# Supplementary material for: Glycinergic axonal inhibition subserves acute spatial sensitivity to sudden increases in sound intensity
Source: eLife journal article supplement (doi:10.7554/elife.62183), 2021-06-14
Supplement: supp [file elife-62183-supp-v1.zip]

Archive with 32 entries (32 files):
- elife_poa_e62183_Transparent_Reporting_File.pdf
- elife_poa_e62183_Figure_1_figure_supplement_1.jpg
- elife_poa_e62183_Figure_1_figure_supplement_2.jpg
- elife_poa_e62183_Figure_1_figure_supplement_3.jpg
- elife_poa_e62183_Figure_1_figure_supplement_4.jpg
- elife_poa_e62183_Figure_1_figure_supplement_5.jpg
- elife_poa_e62183_Figure_2_figure_supplement_1.jpg
- elife_poa_e62183_Figure_3_figure_supplement_1.jpg
- elife_poa_e62183_Figure_4_figure_supplement_1.jpg
- elife_poa_e62183_Figure_6_figure_supplement_1.jpg
- elife_poa_e62183_Figure_7_figure_supplement_1.jpg
- elife_poa_e62183_Figure_7_figure_supplement_2.jpg
- elife_poa_e62183_Figure_8_figure_supplement_1.jpg
- elife_poa_e62183_Figure_8_figure_supplement_2.jpg
- elife_poa_e62183_Figure_1_source_data_1.xlsx
- elife_poa_e62183_Figure_1_figure_supplement_1_source_data_1.xlsx
- elife_poa_e62183_Figure_1_figure_supplement_2_source_data_1.xlsx
- elife_poa_e62183_Figure_1_figure_supplement_3_source_data_1.xlsx
- elife_poa_e62183_Figure_1_figure_supplement_4_source_data_1.xlsx
- elife_poa_e62183_Figure_1_figure_supplement_5_source_data_1.xlsx
- elife_poa_e62183_Figure_2_source_data_1.xlsx
- elife_poa_e62183_Figure_2_figure_supplement_1_source_data_1.xlsx
- elife_poa_e62183_Figure_3_source_data_1.xlsx
- elife_poa_e62183_Figure_3_figure_supplement_1_source_data_1.xlsx
- elife_poa_e62183_Figure_4_source_data_1.xlsx
- elife_poa_e62183_Figure_4_figure_supplement_1_source_data_1.xlsx
- elife_poa_e62183_Figure_7_source_data_1.xlsx
- elife_poa_e62183_Figure_7_figure_supplement_2_source_data_1.xlsx
- elife_poa_e62183_Figure_8_source_data_1.xlsx
- elife_poa_e62183_Figure_8_figure_supplement_1_source_data_1.xlsx
- elife_poa_e62183_Figure_8_figure_supplement_2_source_data_1.xlsx
- elife_poa_e62183_Source_code_1.m
