# Supplementary material for: Glycinergic axonal inhibition subserves acute spatial sensitivity to sudden increases in sound intensity
Source: eLife journal article supplement (doi:10.7554/elife.62183), 2021-06-14
Supplement: supp [file elife-62183-supp-v1.zip › elife_poa_e62183_Figure_1_figure_supplement_1_source_data_1.xlsx]

## Sheet: panel A
Top panel		ILD (dB)	Spike rate (/s)	s.e.m.
		-50	1.02	0.0348
		-40	1.03	0.0223
		-30	0.98	0.0141
		-20	0.03	0.0171
		-10	0	0
		0	0	0
		10	0.07	0.0256
		20	0.11	0.0314
Bottom panel		Stimulus frequency (Hz)	Threshold (dB SPL)
		102	71.965
		109	70.7168
		117	67.5583
		126	69.3821
		135	67.5618
		144	66.5653
		155	66.2094
		166	64.9247
		178	67.2163
		190	66.7129
		204	65.6468
		219	63.7961
		234	64.6401
		251	62.664
		269	62.9387
		289	64.3519
		309	60.9864
		331	61.9015
		355	62.3127
		381	62.1705
		408	60.6429
		437	60.493
		469	60.8584
		502	61.9378
		538	60.5586
		577	64.1686
		619	66.2174
		663	69.4103
		710	69.9374
		761	71.0078
		816	65.8233
		875	73.0619
		937	68.4641
		1005	69.1929
		1077	62.4413
		1154	62.9973
		1237	61.3989
		1326	62.9942
		1421	68.5107
		1523	64.2975
		1632	65.2014
		1749	62.3304
		1875	59.7749
		2010	59.1383
		2154	56.533
		2308	56.5273
		2474	54.2598
		2652	55.3166
		2842	52.7484
		3046	49.2816
		3265	50.862
		3499	48.6452
		3750	42.4284
		4019	39.806
		4308	30.9948
		4617	22.8724
		4948	18.25
		5303	11.25
		5684	10.0052
		6092	26.0052
		6529	47.5625
		6998	61.4896
		7500	65.0625
		8038	67.6042
		8615	76.4167
		9234	80.75
		9896	83.5
		10607	82.375
		11368	80.6667
		12184	78.9167
		13058	72.25
		13995	75.75
		15000	79.75

## Sheet: panel B
Top panel		ILD (dB)	Spike rate (/s)	s.e.m.
		-30	1	0
		-28	0.65	0.1094
		-26	0.55	0.1141
		-24	0.15	0.0819
		-22	0	0
		-20	0	0
		-18	0	0
		-16	0	0
		-14	0	0
		-12	0	0
		-10	0	0
		-8	0	0
Bottom panel		Stimulus frequency (Hz)	Threshold (dB SPL)
		1088	53.2302
		1166	52.9162
		1250	53.2073
		1340	50.2531
		1436	49.0792
		1539	48.3353
		1649	47.1709
		1768	44.9875
		1895	45.6831
		2031	47.1587
		2176	44.8164
		2333	44.0498
		2500	42.7676
		2679	39.3652
		2872	35.7344
		3078	30.3008
		3299	27.4297
		3536	21.0391
		3789	15.5625
		4061	15.2969
		4353	18.7812
		4665	30.8437
		5000	45.75
		5359	63.3125
		5743	74.375
		6156	70.625
		6598	79
		7071	79.25
		7579	80
		8123	80
		8706	79
		9330	80
		10000	80
