# Supplementary material for: Glycinergic axonal inhibition subserves acute spatial sensitivity to sudden increases in sound intensity
Source: eLife journal article supplement (doi:10.7554/elife.62183), 2021-06-14
Supplement: supp [file elife-62183-supp-v1.zip › elife_poa_e62183_Figure_1_figure_supplement_2_source_data_1.xlsx]

## Sheet: Principal LSO
Dataset no:	1		2		3		4		5		6		7		8		9		10		11		12		13		14		15		16		17		18		19		20		21		22		23		24
Cell no:	1		1		2		2		2		2		3		3		4		4		4		4		4		4		4		5		5		5		5		6		6		7		7		8
	ITD (ms)	Spikes/click	ITD (ms)	Spikes/click	ITD (ms)	Spikes/click	ITD (ms)	Spikes/click	ITD (ms)	Spikes/click	ITD (ms)	Spikes/click	ITD (ms)	Spikes/click	ITD (ms)	Spikes/click	ITD (ms)	Spikes/click	ITD (ms)	Spikes/click	ITD (ms)	Spikes/click	ITD (ms)	Spikes/click	ITD (ms)	Spikes/click	ITD (ms)	Spikes/click	ITD (ms)	Spikes/click	ITD (ms)	Spikes/click	ITD (ms)	Spikes/click	ITD (ms)	Spikes/click	ITD (ms)	Spikes/click	ITD (ms)	Spikes/click	ITD (ms)	Spikes/click	ITD (ms)	Spikes/click	ITD (ms)	Spikes/click	ITD (ms)	Spikes/click
	-1.5	1	-1.5	1	-1.5	1	-1.5	0.25	-1.45	0.7	-1.45	0.9	-1.45	1	-0.6	0.625	-1.45	1.7	-1.45	0	-1.45	1.7	-1.45	1.1	-1.45	2	-1.45	0	-1.45	1	-1.45	0.9	-1.45	0.925	-0.95	0.3375	-1.1	1	-1.5	1	-1.45	1	-1.5	0.6875	-1.5	1	-1.5	1.1
	-1.45	1	-1.45	1.025	-1.45	1	-1.45	0.3	-1.4	0.65	-1.4	0.875	-1.4	1	-0.55	0.4875	-1.4	1.75	-1.4	0	-1.4	1.575	-1.4	1.35	-1.4	1.875	-1.4	0	-1.4	1	-1.4	0.90625	-1.4	0.925	-0.9	0.3	-1.05	1	-1.45	1	-1.4	1	-1.45	0.7	-1.45	1	-1.45	1.1
	-1.4	1	-1.4	1.05	-1.4	1	-1.4	0.3875	-1.35	0.575	-1.35	0.875	-1.35	1	-0.5	0.325	-1.35	1.7	-1.35	1.19209e-08	-1.35	1.4	-1.35	1.5	-1.35	1.5	-1.35	0	-1.35	1	-1.35	0.925	-1.35	0.9375	-0.85	0.1375	-1	0.9875	-1.4	1	-1.35	1	-1.4	0.7	-1.4	1	-1.4	1.1
	-1.35	1	-1.35	1.025	-1.35	1	-1.35	0.45	-1.3	0.65	-1.3	0.775	-1.3	1	-0.45	0.1375	-1.3	1.675	-1.3	0.05	-1.3	1.225	-1.3	1.575	-1.3	1.25	-1.3	0	-1.3	1	-1.3	0.95	-1.3	0.95	-0.8	0.15	-0.95	0.975	-1.35	1	-1.3	1	-1.35	0.7	-1.35	1	-1.35	1.075
	-1.3	1	-1.3	1	-1.3	1	-1.3	0.5	-1.25	0.725	-1.25	0.75	-1.25	1	-0.4	0.025	-1.25	1.8	-1.25	0.2	-1.25	1.1	-1.25	1.6	-1.25	1.5	-1.25	0	-1.25	1	-1.25	0.975	-1.25	0.9625	-0.75	0.3	-0.9	0.9625	-1.3	1	-1.25	1	-1.3	0.7125	-1.3	1	-1.3	1.025
	-1.25	1	-1.25	1	-1.25	1	-1.25	0.55	-1.2	0.675	-1.2	0.825	-1.2	1	-0.35	0	-1.2	1.925	-1.2	0.3	-1.2	1.05	-1.2	1.55	-1.2	1.875	-1.2	0	-1.2	1	-1.2	0.9875	-1.2	0.9875	-0.7	0.4625	-0.85	0.95	-1.25	1	-1.2	1	-1.25	0.75	-1.25	1	-1.25	1.05
	-1.2	1	-1.2	1	-1.2	1	-1.2	0.5625	-1.15	0.5	-1.15	0.85	-1.15	1	-0.3	3.72529e-09	-1.15	1.9	-1.15	0.2	-1.15	1.1	-1.15	1.4	-1.15	2	-1.15	0	-1.15	1	-1.15	0.975	-1.15	0.975	-0.65	0.45	-0.8	0.9125	-1.2	1	-1.15	1	-1.2	0.8	-1.2	1	-1.2	1.125
	-1.15	1	-1.15	1	-1.15	1	-1.15	0.5	-1.1	0.4	-1.1	0.875	-1.1	1	-0.25	0.0125	-1.1	1.775	-1.1	0.075	-1.1	1.125	-1.1	1.25	-1.1	1.875	-1.1	0	-1.1	1	-1.1	0.95625	-1.1	0.925	-0.6	0.2125	-0.75	0.8375	-1.15	1	-1.1	1	-1.15	0.85	-1.15	1	-1.15	1.1
	-1.1	1	-1.1	1	-1.1	1	-1.1	0.4375	-1.05	0.45	-1.05	0.9	-1.05	1	-0.2	0.025	-1.05	1.6	-1.05	0.1	-1.05	1	-1.05	1.2	-1.05	1.5	-1.05	0	-1.05	1	-1.05	0.95	-1.05	0.9	-0.55	0.0625	-0.7	0.75	-1.1	1	-1.05	1	-1.1	0.875	-1.1	1	-1.1	1.075
	-1.05	1	-1.05	1	-1.05	1	-1.05	0.45	-1	0.5	-1	0.8	-1	1	-0.15	0.0125	-1	1.475	-1	0.2	-1	0.775	-1	1.175	-1	1.25	-1	0	-1	0.875	-1	0.925	-1	0.9	-0.5	0.025	-0.65	0.525	-1.05	1	-1	1	-1.05	0.85	-1.05	1	-1.05	1.1
	-1	1	-1	1	-1	1	-1	0.4625	-0.95	0.375	-0.95	0.6	-0.95	1	-0.1	0	-0.95	1.5	-0.95	0.3	-0.95	0.5	-0.95	1.1	-0.95	1.5	-0.95	0	-0.95	0.5	-0.95	0.85	-0.95	0.9	-0.45	0.0125	-0.6	0.2375	-1	1	-0.95	1	-1	0.8	-1	1	-1	1.05
	-0.95	1	-0.95	1	-0.95	1	-0.95	0.4	-0.9	0.2	-0.9	0.5	-0.9	1	-0.05	0	-0.9	1.525	-0.9	0.325	-0.9	0.275	-0.9	1	-0.9	1.75	-0.9	0	-0.9	0.125	-0.9	0.73125	-0.9	0.85	-0.4	0.025	-0.55	0.0875001	-0.95	1	-0.9	1	-0.95	0.75	-0.95	1	-0.95	1
	-0.9	1	-0.9	1	-0.9	1	-0.9	0.3125	-0.85	0.15	-0.85	0.425	-0.85	1	0	0	-0.85	1.4	-0.85	0.2	-0.85	0.2	-0.85	0.9	-0.85	1.5	-0.85	0	-0.85	0	-0.85	0.575	-0.85	0.6625	-0.35	0.0125	-0.5	0.025	-0.9	1	-0.85	1	-0.9	0.7125	-0.9	1	-0.9	1.05
	-0.85	1	-0.85	1	-0.85	1	-0.85	0.25	-0.8	0.15	-0.8	0.3	-0.8	1	0.05	0	-0.8	1.225	-0.8	0.05	-0.8	0.175	-0.8	0.8	-0.8	1.125	-0.8	0	-0.8	0	-0.8	0.40625	-0.8	0.425	-0.3	0	-0.45	1.49012e-08	-0.85	1	-0.8	1	-0.85	0.7	-0.85	1	-0.85	1.15
	-0.8	1	-0.8	1	-0.8	1	-0.8	0.1875	-0.75	0.175	-0.75	0.25	-0.75	1	0.1	1.93715e-08	-0.75	1.1	-0.75	7.15256e-08	-0.75	0.0999999	-0.75	0.7	-0.75	1	-0.75	0	-0.75	0	-0.75	0.25	-0.75	0.275	-0.25	2.38419e-08	-0.4	0.0125	-0.8	0.99375	-0.75	1	-0.8	0.65	-0.8	1.0125	-0.8	1.175
	-0.75	1	-0.75	1	-0.75	1	-0.75	0.0999998	-0.7	0.15	-0.7	0.175	-0.7	1	0.15	0.025	-0.7	0.925	-0.7	0.0750002	-0.7	0.025	-0.7	0.55	-0.7	0.875	-0.7	0	-0.7	0	-0.7	0.125	-0.7	0.15	-0.2	0.025	-0.35	0.0375	-0.75	0.975	-0.7	1	-0.75	0.5	-0.75	1.05	-0.75	1.1
	-0.7	1	-0.7	1	-0.7	1	-0.7	0.0249999	-0.65	0.05	-0.65	0.075	-0.65	1	0.2	0.075	-0.65	0.6	-0.65	0.3	-0.65	0	-0.65	0.3	-0.65	0.5	-0.65	0	-0.65	0	-0.65	0.05	-0.65	0.0375	-0.15	0.0625001	-0.3	0.0375	-0.7	0.95	-0.65	1	-0.7	0.3125	-0.7	1.075	-0.7	1.05
	-0.65	1	-0.65	1	-0.65	1	-0.65	0	-0.6	2.83122e-08	-0.6	0.05	-0.6	0.9625	0.25	0.1	-0.6	0.275	-0.6	0.475	-0.6	0	-0.6	0.0749999	-0.6	0.125	-0.6	0	-0.6	0	-0.6	0.0125	-0.6	0	-0.1	0.125	-0.25	0.025	-0.65	0.925	-0.6	1	-0.65	0.15	-0.65	1.05	-0.65	1.05
	-0.6	0.9875	-0.6	1	-0.6	0.9	-0.6	0	-0.55	0.025	-0.55	0.025	-0.55	0.85	0.3	0.1375	-0.55	0.0999999	-0.55	0.4	-0.55	0	-0.55	0	-0.55	0	-0.55	0	-0.55	0	-0.55	0	-0.55	0	-0.05	0.325	-0.2	0.05	-0.6	0.9	-0.55	1	-0.6	0.0374999	-0.6	0.9375	-0.6	1.025
	-0.55	0.95	-0.55	1	-0.55	0.8	-0.55	0	-0.5	0.05	-0.5	0	-0.5	0.7375	0.35	0.3125	-0.5	0.025	-0.5	0.225	-0.5	0	-0.5	0	-0.5	0	-0.5	0	-0.5	0	-0.5	0	-0.5	0	0	0.6125	-0.15	0.1	-0.55	0.875	-0.5	1	-0.55	0	-0.55	0.7	-0.55	0.875
	-0.5	0.849999	-0.5	1	-0.5	0.699999	-0.5	0	-0.45	0.025	-0.45	0	-0.45	0.7	0.4	0.6	-0.45	0	-0.45	0.0999999	-0.45	0	-0.45	0	-0.45	0	-0.45	0	-0.45	0	-0.45	0	-0.45	0	0.05	0.8125	-0.1	0.3125	-0.5	0.85	-0.45	0.9	-0.5	0	-0.5	0.45	-0.5	0.7
	-0.45	0.649999	-0.45	0.949999	-0.45	0.349999	-0.45	0	-0.4	0	-0.4	0	-0.4	0.65	0.45	0.8125	-0.4	0	-0.4	0.025	-0.4	0	-0.4	0	-0.4	0	-0.4	0	-0.4	0	-0.4	0	-0.4	0	0.1	0.9375	-0.05	0.625	-0.45	0.825	-0.4	0.7	-0.45	0	-0.45	0.3	-0.45	0.7
	-0.4	0.412499	-0.4	0.724998	-0.4	0.0499999	-0.4	0	-0.35	0	-0.35	0	-0.35	0.5	0.5	0.9125	-0.35	0	-0.35	0	-0.35	0	-0.35	0	-0.35	0	-0.35	0	-0.35	0	-0.35	8.9407e-09	-0.35	0	0.15	0.9875	0	0.725	-0.4	0.775	-0.35	0.5	-0.4	0	-0.4	0.2	-0.4	0.6
	-0.35	0.2	-0.35	0.349998	-0.35	0	-0.35	0	-0.3	0	-0.3	0	-0.3	0.325	0.55	0.975	-0.3	0	-0.3	0	-0.3	0	-0.3	0	-0.3	0	-0.3	0	-0.3	0	-0.3	0.00625003	-0.3	1.86265e-08	0.2	0.9625	0.05	0.7875	-0.35	0.674999	-0.3	0.275	-0.35	0	-0.35	0.0999999	-0.35	0.35
	-0.3	0.0499998	-0.3	0.0749996	-0.3	0	-0.3	0	-0.25	0	-0.25	0	-0.25	0.2	0.6	1	-0.25	0	-0.25	3.8743e-08	-0.25	0	-0.25	0	-0.25	0	-0.25	0	-0.25	0	-0.25	0.025	-0.25	0.0125001	0.25	1.0125	0.1	0.95	-0.3	0.549999	-0.25	0.15	-0.3	0	-0.3	0.025	-0.3	0.25
	-0.25	0	-0.25	0	-0.25	0	-0.25	0	-0.2	0	-0.2	0	-0.2	0.1125			-0.2	0	-0.2	0.0250001	-0.2	0	-0.2	0	-0.2	0	-0.2	0	-0.2	0	-0.2	0.05	-0.2	0.0750001	0.3	1.0625	0.15	1.0125	-0.25	0.425	-0.2	0.125	-0.25	0	-0.25	0	-0.25	0.25
	-0.2	0	-0.2	0	-0.2	0	-0.2	0	-0.15	0	-0.15	0	-0.15	0.05			-0.15	0	-0.15	0.1	-0.15	0	-0.15	0	-0.15	0	-0.15	0	-0.15	0	-0.15	0.0750001	-0.15	0.1375	0.35	1.0375	0.2	0.9875	-0.2	0.33125	-0.15	0.05	-0.2	0	-0.2	0	-0.2	0.225
	-0.15	0	-0.15	0	-0.15	0	-0.15	0	-0.1	0	-0.1	0	-0.1	0.025			-0.1	0	-0.1	0.15	-0.1	0	-0.1	0	-0.1	0	-0.1	0	-0.1	0	-0.1	0.13125	-0.1	0.2	0.4	1.025	0.25	1.025	-0.15	0.3	-0.1	0.0250002	-0.15	0	-0.15	5.66243e-08	-0.15	0.15
	-0.1	0	-0.1	0	-0.1	0	-0.1	0	-0.05	0	-0.05	0	-0.05	0.05			-0.05	0	-0.05	0.1	-0.05	0	-0.05	0	-0.05	0	-0.05	0	-0.05	0	-0.05	0.25	-0.05	0.3375			0.3	1.1125	-0.1	0.3	-0.05	0.125	-0.1	0	-0.1	0.0250001	-0.1	0.0749999
	-0.05	0	-0.05	0	-0.05	0	-0.05	0	0	0	0	0	0	0.075			0	0	0	0.0250001	0	0	0	0	0	0	0	0	0	0	0	0.4	0	0.5			0.35	1.125	-0.05	0.3	0	0.2	-0.05	0	-0.05	0.1	-0.05	0.0249999
	0	0.0375	0	0.0250005	0	0	0	0	0.05	0	0.05	0	0.05	0.05			0.05	0	0.05	9.23871e-08	0.05	0	0.05	0	0.05	0	0.05	0	0.05	0	0.05	0.55	0.05	0.6625			0.4	1.0875	0	0.3125	0.05	0.175	0	0	0	0.2	0	6.10948e-08
	0.05	0.15	0.05	0.150001	0.05	0	0.05	0	0.1	0	0.1	0	0.1	0.0375001			0.1	0	0.1	0.0250001	0.1	0	0.1	0	0.1	0	0.1	0	0.1	0	0.1	0.6875	0.1	0.8125					0.05	0.35	0.1	0.175	0.05	0	0.05	0.3	0.05	0.0250001
	0.1	0.312501	0.1	0.400001	0.1	0	0.1	0	0.15	0	0.15	0	0.15	0.1			0.15	0	0.15	0.1	0.15	0	0.15	0	0.15	0	0.15	0	0.15	0	0.15	0.8	0.15	0.8875					0.1	0.4	0.15	0.2	0.1	0	0.1	0.425	0.1	0.0500001
	0.15	0.500001	0.15	0.625001	0.15	0	0.15	0	0.2	0	0.2	0	0.2	0.2375			0.2	0	0.2	0.15	0.2	0	0.2	0	0.2	0	0.2	0	0.2	0	0.2	0.88125	0.2	0.9					0.15	0.45	0.2	0.325	0.15	0	0.15	0.6	0.15	0.0750001
	0.2	0.675	0.2	0.775001	0.2	0	0.2	0	0.25	0	0.25	0	0.25	0.45			0.25	5.36442e-08	0.25	0.0999999	0.25	0	0.25	0	0.25	0	0.25	0	0.25	0	0.25	0.925	0.25	0.925					0.2	0.5	0.25	0.5	0.2	0	0.2	0.775	0.2	0.125
	0.25	0.8	0.25	0.925	0.25	0	0.25	0	0.3	0	0.3	0	0.3	0.6625			0.3	0.0250002	0.3	0.0500001	0.3	0	0.3	0	0.3	0	0.3	0	0.3	0	0.3	0.9375	0.3	0.925					0.25	0.55	0.3	0.5	0.25	3.42727e-08	0.25	0.9	0.25	0.15
	0.3	0.8875	0.3	0.975	0.3	0	0.3	0	0.35	0	0.35	0	0.35	0.8			0.35	0.1	0.35	0.1	0.35	0	0.35	0	0.35	0	0.35	2.83122e-07	0.35	0	0.35	0.925	0.35	0.8875					0.3	0.6	0.35	0.525	0.3	0.0125001	0.3	0.975	0.3	0.15
	0.35	0.95	0.35	0.95	0.35	0	0.35	0	0.4	0	0.4	0	0.4	0.8875			0.4	0.15	0.4	0.225	0.4	0	0.4	0	0.4	0	0.4	0.125001	0.4	0	0.4	0.9	0.4	0.8625					0.35	0.65	0.4	0.55	0.35	0.0500002	0.35	1	0.35	0.175
	0.4	0.9875	0.4	0.975	0.4	0	0.4	0	0.45	0	0.45	0	0.45	0.95			0.45	0.0999998	0.45	0.4	0.45	0	0.45	0	0.45	0	0.45	0.500001	0.45	0	0.45	0.875	0.45	0.825					0.4	0.69375	0.45	0.45	0.4	0.1125	0.4	1	0.4	0.25
	0.45	1	0.45	1	0.45	0	0.45	0	0.5	0	0.5	0	0.5	0.9875			0.5	0.0249999	0.5	0.475	0.5	0	0.5	0	0.5	0	0.5	0.749999	0.5	0	0.5	0.85625	0.5	0.7875					0.45	0.725	0.5	0.550001	0.45	0.2	0.45	1	0.45	0.25
	0.5	1	0.5	1	0.5	0	0.5	0	0.55	0	0.55	0	0.55	1			0.55	6.25849e-08	0.55	0.3	0.55	0	0.55	0	0.55	0	0.55	0.499999	0.55	0	0.55	0.85	0.55	0.7625					0.5	0.75	0.55	0.825	0.5	0.2875	0.5	1	0.5	0.175
	0.55	1	0.55	1	0.55	1.54972e-07	0.55	0	0.6	0	0.6	6.4075e-08	0.6	1			0.6	0.0250002	0.6	0.1	0.6	0	0.6	0	0.6	0	0.6	0.125	0.6	0	0.6	0.8125	0.6	0.7125					0.55	0.775	0.6	0.975	0.55	0.35	0.55	1	0.55	0.2
	0.6	1	0.6	1	0.6	0.0500002	0.6	0	0.65	0	0.65	0.0250001	0.65	1			0.65	0.1	0.65	0.1	0.65	0	0.65	0	0.65	0	0.65	0	0.65	0	0.65	0.7	0.65	0.625					0.6	0.8	0.65	1	0.6	0.3875	0.6	1	0.6	0.3
	0.65	1	0.65	1	0.65	0.1	0.65	0	0.7	0	0.7	0.0499999	0.7	1			0.7	0.15	0.7	0.175	0.7	0	0.7	0	0.7	0	0.7	0	0.7	0	0.7	0.575	0.7	0.55					0.65	0.825	0.7	1	0.65	0.4	0.65	1	0.65	0.450001
	0.7	1	0.7	1	0.7	0.1	0.7	0	0.75	0	0.75	0.0249999	0.75	1			0.75	0.0999998	0.75	0.2	0.75	0	0.75	0	0.75	0	0.75	3.42727e-07	0.75	0	0.75	0.5	0.75	0.475					0.7	0.85	0.75	0.975	0.7	0.462501	0.7	1	0.7	0.7
	0.75	1	0.75	1	0.75	0.200001	0.75	0	0.8	0	0.8	0	0.8	1			0.8	0.0249999	0.8	0.175	0.8	0	0.8	0	0.8	0	0.8	0.125001	0.8	0	0.8	0.425	0.8	0.35					0.75	0.875	0.8	0.95	0.75	0.650001	0.75	1	0.75	0.85
	0.8	1	0.8	1	0.8	0.450001	0.8	0	0.85	0	0.85	0	0.85	1			0.85	0	0.85	0.0999999	0.85	0	0.85	0	0.85	0	0.85	0.500001	0.85	0	0.85	0.3	0.85	0.25					0.8	0.9	0.85	0.975	0.8	0.8375	0.8	1	0.8	0.775
	0.85	1	0.85	1	0.85	0.750001	0.85	0	0.9	0	0.9	0	0.9	1			0.9	0	0.9	0.0500001	0.9	0	0.9	0	0.9	0	0.9	0.749999	0.9	0	0.9	0.18125	0.9	0.2625					0.85	0.925	0.9	1	0.85	0.9	0.85	1	0.85	0.65
	0.9	1	0.9	1	0.9	0.95	0.9	0	0.95	0	0.95	7.45058e-08	0.95	1			0.95	0	0.95	0.1	0.95	0	0.95	0	0.95	0	0.95	0.499999	0.95	0	0.95	0.125	0.95	0.325					0.9	0.95	0.95	1	0.9	0.875	0.9	1	0.9	0.650001
	0.95	1			0.95	1	0.95	5.96046e-08	1	7.59959e-08	1	0.0250005	1	1			1	0	1	0.175	1	0	1	0	1	0	1	0.125	1	0	1	0.1125	1	0.3125					0.95	0.975	1	1	0.95	0.8	0.95	1	0.95	0.825001
	1	1			1	1	1	0.0125002	1.05	0.0250001	1.05	0.175001	1.05	1			1.05	0	1.05	0.2	1.05	0	1.05	0	1.05	0	1.05	0	1.05	0	1.05	0.125	1.05	0.2125					1	0.99375	1.05	1	1	0.75	1	1	1	0.975
	1.05	1			1.05	1	1.05	0.0500001	1.1	0.05	1.1	0.35	1.1	1			1.1	0	1.1	0.2	1.1	0	1.1	0	1.1	0	1.1	0	1.1	0	1.1	0.13125	1.1	0.15					1.05	1	1.1	1	1.05	0.8	1.05	1	1.05	0.975
	1.1	1			1.1	0.949999	1.1	0.0749999	1.15	0.0500002	1.15	0.4	1.15	1			1.15	8.04663e-08	1.15	0.2	1.15	0	1.15	0	1.15	0	1.15	4.02331e-07	1.15	0	1.15	0.0999999	1.15	0.15					1.1	1	1.15	1	1.1	0.8625	1.1	1	1.1	0.925
	1.15	1			1.15	0.8	1.15	0.0499998	1.2	0.125	1.2	0.425	1.2	1			1.2	0.0250002	1.2	0.2	1.2	0	1.2	0	1.2	0	1.2	0.125001	1.2	0	1.2	0.0812501	1.2	0.1375					1.15	1	1.2	1	1.15	0.85	1.15	1	1.15	0.9
	1.2	1			1.2	0.75	1.2	0.0124999	1.25	0.225	1.25	0.475	1.25	1			1.25	0.1	1.25	0.2	1.25	0	1.25	0	1.25	0	1.25	0.500001	1.25	0	1.25	0.125	1.25	0.2					1.2	1	1.25	1	1.2	0.8375	1.2	1	1.2	0.925
	1.25	1			1.25	0.85	1.25	1.2815e-07	1.3	0.225	1.3	0.525	1.3	1			1.3	0.175	1.3	0.2	1.3	0	1.3	0	1.3	0	1.3	0.749999	1.3	0	1.3	0.16875	1.3	0.3375					1.25	1	1.3	1	1.25	0.9	1.25	1	1.25	0.95
	1.3	1			1.3	0.9	1.3	0.0250004	1.35	0.275001	1.35	0.525	1.35	1			1.35	0.2	1.35	0.2	1.35	0	1.35	0	1.35	0	1.35	0.499999	1.35	0	1.35	0.15	1.35	0.4					1.3	1	1.35	1	1.3	0.9625	1.3	1	1.3	1
	1.35	1			1.35	0.95	1.35	0.1	1.4	0.425	1.4	0.625001	1.4	1			1.4	0.175	1.4	0.250001	1.4	0	1.4	0	1.4	0	1.4	0.125	1.4	0	1.4	0.13125	1.4	0.4125					1.35	1	1.4	1	1.35	0.95	1.35	1	1.35	1.05
	1.4	1			1.4	1	1.4	0.1625																															1.4	1			1.4	0.925	1.4	1	1.4	1
	1.45	1			1.45	1	1.45	0.15																															1.45	1			1.45	0.95	1.45	1	1.45	1
	1.5	1			1.5	1	1.5	0.1375																															1.5	1			1.5	0.9875	1.5	1	1.5	1.125

## Sheet: Non-principal LSO
Dataset no:	1		2		3		4		5		6		7		8		9		10		11		12		13		14		15		16		17		18		19		20		21		22		23		24		25
Cell no:	1		2		2		2		3		3		4		4		4		5		5		5		5		6		6		6		6		6		6		6		6		7		7		7		7
	ITD (ms)	Spikes/click	ITD (ms)	Spikes/click	ITD (ms)	Spikes/click	ITD (ms)	Spikes/click	ITD (ms)	Spikes/click	ITD (ms)	Spikes/click	ITD (ms)	Spikes/click	ITD (ms)	Spikes/click	ITD (ms)	Spikes/click	ITD (ms)	Spikes/click	ITD (ms)	Spikes/click	ITD (ms)	Spikes/click	ITD (ms)	Spikes/click	ITD (ms)	Spikes/click	ITD (ms)	Spikes/click	ITD (ms)	Spikes/click	ITD (ms)	Spikes/click	ITD (ms)	Spikes/click	ITD (ms)	Spikes/click	ITD (ms)	Spikes/click	ITD (ms)	Spikes/click	ITD (ms)	Spikes/click	ITD (ms)	Spikes/click	ITD (ms)	Spikes/click	ITD (ms)
	-1.5	0	-1.45	0	-1.45	0	-1.45	0	-0.95	1.025	-0.45	0.44375	-0.35	0.05	-0.95	1	-0.45	0.95	-0.95	0.025	-0.95	0	-0.95	0.05	-1.5	0.01	-1.5	0.325	-1.5	0.9125	-1.5	0.5	-1.45	0.375	-1.45	0.975	-1.45	1	-1.45	0.35	-1.45	0.8	-1.5	0.15	-1.5	1.05	-1.45	1	-1.45
	-1.45	0	-1.4	0	-1.4	0	-1.4	0	-0.9	1.0125	-0.4	0.46875	-0.3	0.025	-0.9	1	-0.4	0.85	-0.9	0.04375	-0.9	0	-0.9	0.04125	-1.45	0.01	-1.45	0.2	-1.45	0.9	-1.45	0.55	-1.4	0.4375	-1.4	0.95	-1.4	1	-1.4	0.275	-1.4	0.7	-1.45	0.125	-1.45	1.075	-1.4	1	-1.4
	-1.4	0	-1.35	0	-1.35	0	-1.35	0	-0.85	1	-0.35	0.41875	-0.25	0	-0.85	1	-0.35	0.775	-0.85	0.05	-0.85	0	-0.85	0.035	-1.4	0.015	-1.4	0.0750001	-1.4	0.8875	-1.4	0.525	-1.35	0.416667	-1.35	0.875	-1.35	1	-1.35	0.25	-1.35	0.6125	-1.4	0.1125	-1.4	1.10625	-1.35	1	-1.35
	-1.35	0	-1.3	0	-1.3	0	-1.3	0	-0.8	1	-0.3	0.45	-0.2	0	-0.8	1	-0.3	0.725	-0.8	0.05625	-0.8	0	-0.8	0.035	-1.35	0.02	-1.35	0.1	-1.35	0.85	-1.35	0.575	-1.3	0.470833	-1.3	0.8125	-1.3	0.9875	-1.3	0.275	-1.3	0.5625	-1.35	0.125	-1.35	1.15	-1.3	1	-1.3
	-1.3	0	-1.25	0	-1.25	0	-1.25	0	-0.75	1	-0.25	0.45	-0.15	0	-0.75	1	-0.25	0.7	-0.75	0.075	-0.75	0	-0.75	0.045	-1.3	0.00999998	-1.3	0.1625	-1.3	0.8125	-1.3	0.7	-1.25	0.541667	-1.25	0.775	-1.25	0.975	-1.25	0.2125	-1.25	0.5	-1.3	0.15	-1.3	1.2	-1.25	1	-1.25
	-1.25	0	-1.2	0	-1.2	0	-1.2	0	-0.7	1	-0.2	0.33125	-0.1	0	-0.7	1	-0.2	0.55	-0.7	0.08125	-0.7	0	-0.7	0.05125	-1.25	0	-1.25	0.15	-1.25	0.8	-1.25	0.65	-1.2	0.495833	-1.2	0.725	-1.2	0.9875	-1.2	0.2	-1.2	0.4875	-1.25	0.175	-1.25	1.25	-1.2	1.025	-1.2
	-1.2	0	-1.15	0	-1.15	0	-1.15	0	-0.65	1	-0.15	0.275	-0.05	0	-0.65	1	-0.15	0.35	-0.65	0.05	-0.65	0	-0.65	0.04	-1.2	0	-1.2	0.125	-1.2	0.7875	-1.2	0.475	-1.15	0.425	-1.15	0.775	-1.15	0.95	-1.15	0.2375	-1.15	0.4625	-1.2	0.1875	-1.2	1.275	-1.15	1.05	-1.15
	-1.15	9.4374e-08	-1.1	0	-1.1	0	-1.1	0	-0.6	1	-0.1	0.25	0	0	-0.6	1	-0.1	0.325	-0.6	0.0125	-0.6	0	-0.6	0.025	-1.15	2.26498e-08	-1.15	0.15	-1.15	0.75	-1.15	0.45	-1.1	0.3875	-1.1	0.8625	-1.1	0.85	-1.1	0.175	-1.1	0.35	-1.15	0.175	-1.15	1.25	-1.1	1.05	-1.1
	-1.1	0.041667	-1.05	0	-1.05	0	-1.05	0	-0.55	1.0125	-0.05	0.23125	0.05	3.27826e-08	-0.55	1	-0.05	0.275	-0.55	0	-0.55	3.72529e-09	-0.55	0.02	-1.1	0.0100001	-1.1	0.1875	-1.1	0.75	-1.1	0.5	-1.05	0.316667	-1.05	0.7875	-1.05	0.6875	-1.05	0.1375	-1.05	0.225	-1.1	0.15	-1.1	1.2	-1.05	1.05	-1.05
	-1.05	0.166667	-1	0	-1	0	-1	0	-0.5	1.0125	0	0.36875	0.1	0.0250001	-0.5	1	0	0.2	-0.5	0	-0.5	0.00625001	-0.5	0.025			-1.05	0.2	-1.05	0.85	-1.05	0.475	-1	0.245833	-1	0.7	-1	0.525	-1	0.225	-1	0.1375	-1.05	0.125	-1.05	1.15	-1	1.025	-1
	-1	0.333334	-0.95	0	-0.95	0	-0.95	0	-0.45	0.975	0.05	0.4375	0.15	0.075	-0.45	1	0.05	0.275	-0.45	8.9407e-09	-0.45	0.025	-0.45	0.04			-1	0.2125	-1	0.9375	-1	0.525	-0.95	0.341667	-0.95	0.725	-0.95	0.525	-0.95	0.35	-0.95	0.075	-1	0.125	-1	1.11875	-0.95	1.025	-0.95
	-0.95	0.5	-0.9	0	-0.9	0	-0.9	0	-0.4	0.875	0.1	0.3	0.2	0.1	-0.4	0.8	0.1	0.425	-0.4	0.0125	-0.4	0.0375	-0.4	0.05625			-0.95	0.25	-0.95	0.9	-0.95	0.6	-0.9	0.483333	-0.9	0.7625	-0.9	0.475	-0.9	0.325	-0.9	0.05	-0.95	0.175	-0.95	1.125	-0.9	1.05	-0.9
	-0.9	0.666667	-0.85	0	-0.85	0	-0.85	0	-0.35	0.8	0.15	0.225	0.25	0.125	-0.35	0.55	0.15	0.6	-0.35	0.05	-0.35	0.025	-0.35	0.065			-0.9	0.275	-0.9	0.85	-0.9	0.575	-0.85	0.391667	-0.85	0.65	-0.85	0.3875	-0.85	0.2	-0.85	0.05	-0.9	0.25	-0.9	1.15	-0.85	1.025	-0.85
	-0.85	0.833334	-0.8	0	-0.8	0	-0.8	0	-0.3	0.7625	0.2	0.2875	0.3	0.15	-0.3	0.55	0.2	0.8	-0.3	0.09375	-0.3	0.00625	-0.3	0.0675			-0.85	0.25	-0.85	0.9	-0.85	0.55	-0.8	0.170833	-0.8	0.35	-0.8	0.45	-0.8	0.125	-0.8	0.0375	-0.85	0.325	-0.85	1.175	-0.8	1	-0.8
	-0.8	1.04167	-0.75	0	-0.75	0	-0.75	0	-0.25	0.6	0.25	0.36875	0.35	0.125	-0.25	0.4	0.25	0.925	-0.25	0.125	-0.25	0	-0.25	0.065			-0.8	0.225	-0.8	0.95	-0.8	0.424999	-0.75	0.0916667	-0.75	0.1875	-0.75	0.4375	-0.75	0.0750001	-0.75	0.0125	-0.8	0.35625	-0.8	1.1625	-0.75	1	-0.75
	-0.75	1.33333	-0.7	0	-0.7	0	-0.7	0	-0.2	0.425	0.3	0.45	0.4	0.075	-0.2	0.15	0.3	0.95	-0.2	0.13125	-0.2	0	-0.2	0.0625			-0.75	0.25	-0.75	0.9	-0.75	0.175	-0.7	0.125	-0.7	0.1875	-0.7	0.3375	-0.7	0.125	-0.7	0	-0.75	0.3	-0.75	1.075	-0.7	0.975	-0.7
	-0.7	1.625	-0.65	0	-0.65	2.68221e-08	-0.65	0	-0.15	0.3625	0.35	0.59375	0.45	0.0500002	-0.15	0.15	0.35	0.95	-0.15	0.1	-0.15	6.70551e-09	-0.15	0.065			-0.7	0.2875	-0.7	0.85	-0.7	0.0750002	-0.65	0.125	-0.65	0.15	-0.65	0.2625	-0.65	0.3	-0.65	0	-0.7	0.2	-0.7	0.95	-0.65	0.95	-0.65
	-0.65	1.83333	-0.6	0	-0.6	0.025	-0.6	0	-0.1	0.35	0.4	0.7375	0.5	0.15	-0.1	0.2	0.4	0.95	-0.1	0.0625	-0.1	0.00625001	-0.1	0.07125			-0.65	0.3	-0.65	0.9	-0.65	0.15	-0.6	0.0875	-0.6	0.125	-0.6	0.2	-0.6	0.35	-0.6	0	-0.65	0.0999999	-0.65	0.825	-0.6	0.8	-0.6
	-0.6	1.91667	-0.55	0	-0.55	0.05	-0.55	0	-0.05	0.35			0.55	0.3	-0.05	0.15			-0.05	0.05	-0.05	0.025	-0.05	0.08			-0.6	0.325	-0.6	0.975	-0.6	0.2	-0.55	0.0708333	-0.55	0.1125	-0.55	0.1375	-0.55	0.2125	-0.55	0	-0.6	0.025	-0.6	0.725	-0.55	0.425	-0.55
	-0.55	1.83333	-0.5	0	-0.5	0.025	-0.5	0	0	0.375			0.6	0.3	0	0.1			0	0.06875	0	0.0375	0	0.0875			-0.55	0.4	-0.55	1	-0.55	0.175	-0.5	0.129167	-0.5	0.1	-0.5	0.0875	-0.5	0.1	-0.5	0	-0.55	0	-0.55	0.675	-0.5	0.225	-0.5
	-0.5	1.66667	-0.45	0	-0.45	0	-0.45	0	0.05	0.4375			0.65	0.3	0.05	0.15			0.05	0.125	0.05	0.025	0.05	0.09			-0.5	0.4625	-0.5	0.975	-0.5	0.125	-0.45	0.175	-0.45	0.0875	-0.45	0.0875	-0.45	0.075	-0.45	0	-0.5	0	-0.5	0.65	-0.45	0.325	-0.45
	-0.45	1.5	-0.4	0	-0.4	0	-0.4	0	0.1	0.5125			0.7	0.375	0.1	0.15			0.1	0.1625	0.1	0.00625	0.1	0.085			-0.45	0.45	-0.45	0.9	-0.45	0.0749999	-0.4	0.0916666	-0.4	0.05	-0.4	0.075	-0.4	0.0625	-0.4	0	-0.45	0	-0.45	0.625	-0.4	0.425	-0.4
	-0.4	1.375	-0.35	0	-0.35	0	-0.35	0	0.15	0.55			0.75	0.375	0.15	0.1			0.15	0.125	0.15	0	0.15	0.07			-0.4	0.3875	-0.4	0.8375	-0.4	0.05	-0.35	0.0208333	-0.35	0.025	-0.35	0.0375	-0.35	0.0375	-0.35	0	-0.4	0	-0.4	0.5875	-0.35	0.5	-0.35
	-0.35	1.33333	-0.3	0	-0.3	0	-0.3	0	0.2	0.6125			0.8	0.45	0.2	0.25			0.2	0.075	0.2	0	0.2	0.0625			-0.35	0.3	-0.35	0.85	-0.35	0.0499999	-0.3	0.025	-0.3	0.0375	-0.3	0.025	-0.3	0.0375	-0.3	0	-0.35	0	-0.35	0.525	-0.3	0.5	-0.3
	-0.3	1.25	-0.25	0	-0.25	0	-0.25	0	0.25	0.75			0.85	0.675	0.25	0.55			0.25	0.075	0.25	0	0.25	0.08			-0.3	0.2375	-0.3	0.875	-0.3	0.025	-0.25	0.0125	-0.25	0.0375	-0.25	0.0125	-0.25	0.05	-0.25	0	-0.3	0	-0.3	0.45	-0.25	0.35	-0.25
	-0.25	0.999999	-0.2	0	-0.2	0	-0.2	0	0.3	0.825			0.9	0.8	0.3	0.7			0.3	0.0875	0.3	0	0.3	0.1025			-0.25	0.25	-0.25	0.85	-0.25	0.0250003	-0.2	1.25729e-08	-0.2	0.0125	-0.2	0	-0.2	0.0375	-0.2	0	-0.25	0	-0.25	0.375	-0.2	0.325	-0.2
	-0.2	0.75	-0.15	0	-0.15	0	-0.15	0	0.35	0.85					0.35	0.75			0.35	0.075	0.35	2.08616e-08	0.35	0.11			-0.2	0.2875	-0.2	0.8125	-0.2	0.125	-0.15	0.00416668	-0.15	0.025	-0.15	0	-0.15	0.025	-0.15	0	-0.2	0	-0.2	0.3125	-0.15	0.475	-0.15
	-0.15	0.666667	-0.1	0	-0.1	0	-0.1	0	0.4	0.9125					0.4	0.9			0.4	0.0625	0.4	0.0125001	0.4	0.10875			-0.15	0.3	-0.15	0.8	-0.15	0.175	-0.1	0.0208333	-0.1	0.05	-0.1	2.16066e-08	-0.1	0.025	-0.1	0	-0.15	0	-0.15	0.275	-0.1	0.55	-0.1
	-0.1	0.625	-0.05	0	-0.05	0	-0.05	0	0.45	0.95					0.45	0.95			0.45	0.075	0.45	0.0500001	0.45	0.105			-0.1	0.3125	-0.1	0.8	-0.1	0.0749997	-0.05	0.0291667	-0.05	0.05	-0.05	0.0125	-0.05	0.0125	-0.05	0	-0.1	0	-0.1	0.25	-0.05	0.525	-0.05
	-0.05	0.5	0	0	0	0.025	0	0	0.5	0.975					0.5	0.9			0.5	0.09375	0.5	0.0937501	0.5	0.0975			-0.05	0.35	-0.05	0.8	-0.05	0	0	0.0208334	0	0.05	0	0.025	0	0.0125	0	0	-0.05	0	-0.05	0.225	0	0.475	0
	0	0.333334	0.05	0	0.05	0.0499999	0.05	0	0.55	1.025					0.55	0.95			0.55	0.1	0.55	0.125	0.55	0.085			0	0.4125	0	0.8125	0	0	0.05	0.0208334	0.05	0.05	0.05	0.0125	0.05	0.0375	0.05	0	0	0	0	0.19375	0.05	0.4	0.05
	0.05	0.166667	0.1	0	0.1	0.025	0.1	0	0.6	1.0375					0.6	1			0.6	0.1	0.6	0.125	0.6	0.07125			0.05	0.5	0.05	0.85	0.05	0	0.1	0.0541667	0.1	0.0625	0.1	0.0125	0.1	0.05	0.1	0	0.05	0	0.05	0.15	0.1	0.3	0.1
	0.1	0.0416667	0.15	0	0.15	0	0.15	0	0.65	1.025					0.65	1			0.65	0.1	0.65	0.0749999	0.65	0.06			0.1	0.5875	0.1	0.875	0.1	9.38773e-08	0.15	0.0791666	0.15	0.0875	0.15	0.025	0.15	0.0375	0.15	0	0.1	0	0.1	0.1	0.15	0.35	0.15
	0.15	0	0.2	0	0.2	5.21541e-08	0.2	0	0.7	1.0375					0.7	1			0.7	0.09375	0.7	0.025	0.7	0.06			0.15	0.65	0.15	0.85	0.15	0.0250003	0.2	0.0708333	0.2	0.1125	0.2	0.025	0.2	0.025	0.2	0	0.15	3.27826e-08	0.15	0.05	0.2	0.4	0.2
	0.2	0	0.25	5.36442e-08	0.25	0.0250001	0.25	0	0.75	1.05					0.75	1			0.75	0.075	0.75	0.025	0.75	0.08			0.2	0.624999	0.2	0.8125	0.2	0.1	0.25	0.141667	0.25	0.125	0.25	0.0375	0.25	0.0375001	0.25	0	0.2	0.0125001	0.2	0.0250001	0.25	0.2	0.25
	0.25	0	0.3	0.0250001	0.3	0.0750001	0.3	0	0.8	1.0625					0.8	1			0.8	0.05625	0.8	0.0375	0.8	0.09875			0.25	0.449999	0.25	0.8	0.25	0.125	0.3	0.25	0.3	0.1125	0.3	0.0500001	0.3	0.0625	0.3	0	0.25	0.0500001	0.25	0.0500001	0.3	0.0500003	0.3
	0.3	0	0.35	0.05	0.35	0.0999999	0.35	0	0.85	1.075					0.85	1			0.85	0.05	0.85	0.025	0.85	0.095			0.3	0.3	0.3	0.8125	0.3	0.175	0.35	0.245834	0.35	0.0875002	0.35	0.0875001	0.35	0.0624999	0.35	0	0.3	0.1	0.3	0.1	0.35	0.175	0.35
	0.35	0	0.4	0.05	0.4	0.0749999	0.4	0	0.9	1.075					0.9	1			0.9	0.05	0.9	0.0187501	0.9	0.09			0.35	0.35	0.35	0.85	0.35	0.275	0.4	0.216667	0.4	0.175	0.4	0.1375	0.4	0.025	0.4	0	0.35	0.15	0.35	0.15	0.4	0.4	0.4
	0.4	0	0.45	0.05	0.45	0.0249999	0.45	0																			0.4	0.45	0.4	0.8875	0.4	0.2	0.45	0.283334	0.45	0.3625	0.45	0.1125	0.45	0.0250001	0.45	2.98023e-08	0.4	0.18125	0.4	0.175	0.45	0.399999	0.45
	0.45	1.73847e-07	0.5	0.05	0.5	1.2219e-07	0.5	0																			0.45	0.45	0.45	0.9	0.45	0.100001	0.5	0.308333	0.5	0.4	0.5	0.15	0.5	0.0500001	0.5	0.0125	0.45	0.175	0.45	0.15	0.5	0.175	0.5
	0.5	0.0416672	0.55	0.05	0.55	0.0500001	0.55	2.08616e-07																			0.5	0.462501	0.5	0.9125	0.5	0.225001	0.55	0.229167	0.55	0.4	0.55	0.275	0.55	0.0875003	0.55	0.025	0.5	0.15	0.5	0.0999999	0.55	0.0500003	0.55
	0.55	0.166667	0.6	0.0500001	0.6	0.0999999	0.6	0.0833335																			0.55	0.600001	0.55	0.95	0.55	0.475	0.6	0.2375	0.6	0.5625	0.6	0.3	0.6	0.2	0.6	0.0125	0.55	0.125	0.55	0.0499999	0.6	0.150001	0.6
	0.6	0.333334	0.65	0.0750001	0.65	0.05	0.65	0.166666																			0.6	0.775001	0.6	0.9625	0.6	0.499999	0.65	0.304167	0.65	0.7375	0.65	0.3125	0.65	0.2375	0.65	3.27826e-08	0.6	0.0999999	0.6	0.01875	0.65	0.425	0.65
	0.65	0.5	0.7	0.1	0.7	0.0500002	0.7	0.0833331																			0.65	0.9	0.65	0.9	0.65	0.325	0.7	0.270834	0.7	0.7375	0.7	0.425	0.7	0.1375	0.7	0.0125001	0.65	0.0749999	0.65	0.0250001	0.7	0.575	0.7
	0.7	0.541666	0.75	0.1	0.75	0.125	0.75	0																			0.7	0.874999	0.7	0.85	0.7	0.325	0.75	0.2	0.75	0.575	0.75	0.5	0.75	0.0499999	0.75	0.0500001	0.7	0.0499999	0.7	0.0500001	0.75	0.425	0.75
	0.75	0.333332	0.8	0.125	0.8	0.0999998	0.8	0																			0.75	0.599999	0.75	0.9	0.75	0.35	0.8	0.170833	0.8	0.5875	0.8	0.4875	0.8	0.0250001	0.8	0.075	0.75	0.0249999	0.75	0.0750001	0.8	0.375001	0.8
	0.8	0.125	0.85	0.2	0.85	0.0249999	0.85	0																			0.8	0.35	0.8	0.9625	0.8	0.3	0.85	0.129167	0.85	0.725	0.85	0.55	0.85	0.0500001	0.85	0.075	0.8	0.00624998	0.8	0.11875	0.85	0.625001	0.85
	0.85	0.166668	0.9	0.25	0.9	1.46031e-07	0.9	0																			0.85	0.400001	0.85	0.95	0.85	0.400001	0.9	0.120834	0.9	0.7625	0.9	0.6	0.9	0.0875001	0.9	0.075	0.85	0	0.85	0.2	0.9	0.875	0.9
	0.9	0.375001	0.95	0.325	0.95	0.0500003	0.95	0																			0.9	0.525	0.9	0.925	0.9	0.575001	0.95	0.258334	0.95	0.825	0.95	0.525	0.95	0.1375	0.95	0.0625	0.9	0	0.9	0.3			0.95
	0.95	0.666668	1	0.425	1	0.15	1	0																			0.95	0.5	0.95	0.95	0.95	0.725	1	0.379167	1	0.8875	1	0.55	1	0.175	1	0.0625002	0.95	8.9407e-08	0.95	0.4			1
	1	0.875	1.05	0.425	1.05	0.175	1.05	0																			1	0.45	1	0.9625	1	0.7	1.05	0.366667	1.05	0.8875	1.05	0.65	1.05	0.125	1.05	0.1375	1	0.0250003	1	0.5			1.05
	1.05	0.833333	1.1	0.4	1.1	0.125	1.1	0																			1.05	0.5	1.05	0.9	1.05	0.6	1.1	0.325	1.1	0.875	1.1	0.7125	1.1	0.125	1.1	0.2375	1.05	0.1	1.05	0.6			1.1
	1.1	0.791668	1.15	0.4	1.15	0.0999999	1.15	0																			1.1	0.5875	1.1	0.85	1.1	0.6	1.15	0.2625	1.15	0.925	1.15	0.85	1.15	0.1875	1.15	0.3125	1.1	0.2	1.1	0.7			1.15
	1.15	1	1.2	0.375	1.2	0.0750001	1.2	0																			1.15	0.65	1.15	0.9	1.15	0.55	1.2	0.191667	1.2	0.95	1.2	0.9375	1.2	0.1375	1.2	0.375	1.15	0.3	1.15	0.8			1.2
	1.2	1.16667	1.25	0.275	1.25	0.1	1.25	0																			1.2	0.7	1.2	0.9625	1.2	0.525	1.25	0.208333	1.25	0.9125	1.25	0.9125	1.25	0.0875002	1.25	0.3625	1.2	0.3625	1.2	0.8875			1.25
	1.25	0.999999	1.3	0.275	1.3	0.225	1.3	0																			1.25	0.75	1.25	0.95	1.25	0.550001	1.3	0.304167	1.3	0.875	1.3	0.8875	1.3	0.1375	1.3	0.3625	1.25	0.35	1.25	0.95			1.3
	1.3	0.833334	1.35	0.325	1.35	0.225	1.35	0																			1.3	0.775	1.3	0.925	1.3	0.650001	1.35	0.366667	1.35	0.85	1.35	0.8625	1.35	0.2125	1.35	0.4375	1.3	0.3	1.3	1			1.35
	1.35	1	1.4	0.225	1.4	0.125	1.4	0																			1.35	0.75	1.35	0.95	1.35	0.8	1.4	0.383333	1.4	0.875	1.4	0.9	1.4	0.2375	1.4	0.45	1.35	0.25	1.35	1.05			1.4
	1.4	1.25																									1.4	0.725	1.4	0.975	1.4	0.8											1.4	0.23125	1.4	1.1125			1.45
	1.45	1.33333																									1.45	0.75	1.45	0.95	1.45	0.725											1.45	0.275	1.45	1.2			1.5
	1.5	1.29167																									1.5	0.7625	1.5	0.925	1.5	0.675											1.5	0.35	1.5	1.3
[truncated: 27 more columns]

## Sheet: MSO
Dataset no:	1		2		3		4		5		6		7		8		9		10		11		12		13		14		15		16		17		18		19		20		21		22		23		24		25
Cell no:	1		1		1		2		3		3		3		4		4		5		5		6		6		7		7		7		8		8		9		9		10		10		11		11		11
	ITD (ms)	Spikes/click	ITD (ms)	Spikes/click	ITD (ms)	Spikes/click	ITD (ms)	Spikes/click	ITD (ms)	Spikes/click	ITD (ms)	Spikes/click	ITD (ms)	Spikes/click	ITD (ms)	Spikes/click	ITD (ms)	Spikes/click	ITD (ms)	Spikes/click	ITD (ms)	Spikes/click	ITD (ms)	Spikes/click	ITD (ms)	Spikes/click	ITD (ms)	Spikes/click	ITD (ms)	Spikes/click	ITD (ms)	Spikes/click	ITD (ms)	Spikes/click	ITD (ms)	Spikes/click	ITD (ms)	Spikes/click	ITD (ms)	Spikes/click	ITD (ms)	Spikes/click	ITD (ms)	Spikes/click	ITD (ms)	Spikes/click	ITD (ms)	Spikes/click	ITD (ms)
	-1.5		-1.5		-1.5		-1.5	0.175	-1.5	0.4875	-1.5	0.7125	-1.5		-1.5	0.275	-1.5	0	-1.5	1	-1.5	0.975	-1.5	1.175	-1.5	1	-1.5		-1.5		-1.5		-1.5	0.525	-1.5	0.26875	-1.5		-1.5		-1.5	0.325	-1.5	0.3375	-1.5	0.35	-1.5	0.05625	-1.5
	-1.45		-1.45		-1.45		-1.45	0.0999999	-1.45	0.45	-1.45	0.75	-1.45		-1.45	0.2	-1.45	0	-1.45	1	-1.45	0.9	-1.45	1.1	-1.45	1	-1.45		-1.45		-1.45		-1.45	0.45	-1.45	0.325	-1.45		-1.45		-1.45	0.4	-1.45	0.45	-1.45	0.2	-1.45	0.075	-1.45
	-1.4		-1.4		-1.4		-1.4	0.025	-1.4	0.4375	-1.4	0.75	-1.4		-1.4	0.1375	-1.4	0	-1.4	1	-1.4	0.85	-1.4	1.125	-1.4	1	-1.4		-1.4		-1.4		-1.4	0.4	-1.4	0.38125	-1.4		-1.4		-1.4	0.5125	-1.4	0.525	-1.4	0.05	-1.4	0.1	-1.4
	-1.35		-1.35		-1.35		-1.35	5.0664e-08	-1.35	0.5	-1.35	0.65	-1.35		-1.35	0.15	-1.35	2.5332e-08	-1.35	1	-1.35	0.9	-1.35	1.4	-1.35	1	-1.35		-1.35		-1.35		-1.35	0.45	-1.35	0.4	-1.35		-1.35		-1.35	0.65	-1.35	0.45	-1.35	0	-1.35	0.125	-1.35
	-1.3		-1.3		-1.3		-1.3	0.0250002	-1.3	0.55	-1.3	0.5625	-1.3		-1.3	0.1875	-1.3	0.0125001	-1.3	1	-1.3	0.975	-1.3	1.6	-1.3	1	-1.3		-1.3		-1.3		-1.3	0.54375	-1.3	0.38125	-1.3		-1.3		-1.3	0.7375	-1.3	0.3875	-1.3	0	-1.3	0.15	-1.3
	-1.25		-1.25		-1.25		-1.25	0.1	-1.25	0.5	-1.25	0.6	-1.25		-1.25	0.2	-1.25	0.0500001	-1.25	1	-1.25	1	-1.25	1.4	-1.25	1	-1.25		-1.25		-1.25		-1.25	0.625	-1.25	0.325	-1.25		-1.25		-1.25	0.7	-1.25	0.5	-1.25	2.38419e-08	-1.25	0.175	-1.25
	-1.2		-1.2		-1.2		-1.2	0.15	-1.2	0.4125	-1.2	0.675	-1.2		-1.2	0.1875	-1.2	0.0749999	-1.2	1	-1.2	1	-1.2	1.15	-1.2	1	-1.2		-1.2		-1.2		-1.2	0.66875	-1.2	0.26875	-1.2		-1.2		-1.2	0.5875	-1.2	0.5875	-1.2	0.0250001	-1.2	0.175	-1.2
	-1.15		-1.15		-1.15		-1.15	0.0999999	-1.15	0.35	-1.15	0.7	-1.15		-1.15	0.15	-1.15	0.0499999	-1.15	1	-1.15	1	-1.15	1.2	-1.15	1	-1.15		-1.15		-1.15		-1.15	0.65	-1.15	0.25	-1.15		-1.15		-1.15	0.45	-1.15	0.45	-1.15	0.1	-1.15	0.125	-1.15
	-1.1		-1.1		-1.1		-1.1	0.0500001	-1.1	0.2875	-1.1	0.65	-1.1		-1.1	0.1125	-1.1	0.0125	-1.1	1	-1.1	0.975	-1.1	1.275	-1.1	1	-1.1		-1.1		-1.1		-1.1	0.63125	-1.1	0.25625	-1.1		-1.1		-1.1	0.3625	-1.1	0.275	-1.1	0.175	-1.1	0.06875	-1.1
	-1.05		-1.05		-1.05		-1.05	0.1	-1.05	0.2	-1.05	0.5	-1.05		-1.05	0.1	-1.05	0	-1.05	1	-1.05	0.9	-1.05	1.1	-1.05	1	-1.05		-1.05		-1.05		-1.05	0.675	-1.05	0.275	-1.05		-1.05		-1.05	0.4	-1.05	0.25	-1.05	0.2	-1.05	0.05	-1.05
	-1		-1		-1		-1	0.15	-1	0.1625	-1	0.375	-1		-1	0.1125	-1	0	-1	1	-1	0.85	-1	0.9	-1	0.975	-1		-1		-1		-1	0.7375	-1	0.31875	-1		-1		-1	0.5	-1	0.3125	-1	0.175	-1	0.0750001	-1
	-0.95	9.93411e-09	-0.95	0	-0.95	0.0833333	-0.95	0.0999999	-0.95	0.25	-0.95	0.4	-0.95	0.6	-0.95	0.15	-0.95	0	-0.95	1	-0.95	0.9	-0.95	0.9	-0.95	0.9	-0.95	0.1	-0.95		-0.95		-0.95	0.775	-0.95	0.4	-0.95	0.275	-0.95	1.2125	-0.95	0.6	-0.95	0.4	-0.95	0.0999999	-0.95	0.15	-0.95
	-0.9	0.0833333	-0.9	0	-0.9	0.0833333	-0.9	0.0500001	-0.9	0.325	-0.9	0.4625	-0.9	0.6	-0.9	0.2	-0.9	0	-0.9	1	-0.9	0.95	-0.9	1.05	-0.9	0.85	-0.9	0.1	-0.9		-0.9		-0.9	0.7375	-0.9	0.4625	-0.9	0.2875	-0.9	1.2125	-0.9	0.675	-0.9	0.4625	-0.9	0.0500001	-0.9	0.20625	-0.9
	-0.85	0.166667	-0.85	1.98682e-08	-0.85	0.166667	-0.85	0.1	-0.85	0.25	-0.85	0.45	-0.85	0.6	-0.85	0.25	-0.85	3.27826e-08	-0.85	1	-0.85	0.9	-0.85	1.3	-0.85	0.9	-0.85	0.075	-0.85		-0.85		-0.85	0.575	-0.85	0.45	-0.85	0.3125	-0.85	1.2625	-0.85	0.7	-0.85	0.45	-0.85	0.1	-0.85	0.175	-0.85
	-0.8	0.166667	-0.8	0.0833334	-0.8	0.25	-0.8	0.15	-0.8	0.1375	-0.8	0.45	-0.8	0.625	-0.8	0.275	-0.8	0.0125001	-0.8	0.975	-0.8	0.85	-0.8	1.5	-0.8	0.975	-0.8	0.075	-0.8		-0.8		-0.8	0.41875	-0.8	0.4125	-0.8	0.2625	-0.8	1.225	-0.8	0.6875	-0.8	0.4	-0.8	0.175	-0.8	0.11875	-0.8
	-0.75	0.25	-0.75	0.25	-0.75	0.333333	-0.75	0.0999999	-0.75	0.1	-0.75	0.55	-0.75	0.625	-0.75	0.25	-0.75	0.0500001	-0.75	0.9	-0.75	0.9	-0.75	1.5	-0.75	1	-0.75	0.15	-0.75		-0.75		-0.75	0.4	-0.75	0.4	-0.75	0.225	-0.75	1.1625	-0.75	0.65	-0.75	0.35	-0.75	0.2	-0.75	0.1	-0.75
	-0.7	0.25	-0.7	0.333333	-0.7	0.25	-0.7	0.0750003	-0.7	0.162501	-0.7	0.6625	-0.7	0.8	-0.7	0.225	-0.7	0.0749999	-0.7	0.825	-0.7	0.975	-0.7	1.4	-0.7	1	-0.7	0.15	-0.7		-0.7		-0.7	0.44375	-0.7	0.45	-0.7	0.275	-0.7	1.15	-0.7	0.6	-0.7	0.3125	-0.7	0.175	-0.7	0.09375	-0.7
	-0.65	0.0833333	-0.65	0.333333	-0.65	0.333333	-0.65	0.2	-0.65	0.35	-0.65	0.7	-0.65	0.925	-0.65	0.25	-0.65	0.0499999	-0.65	0.8	-0.65	1	-0.65	1.3	-0.65	1	-0.65	0.05	-0.65		-0.65		-0.65	0.475	-0.65	0.6	-0.65	0.3	-0.65	1.125	-0.65	0.55	-0.65	0.3	-0.65	0.0999999	-0.65	0.075	-0.65
	-0.6	0.0833334	-0.6	0.25	-0.6	0.416667	-0.6	0.3	-0.6	0.525	-0.6	0.7375	-0.6	0.975	-0.6	0.3	-0.6	0.0125	-0.6	0.825	-0.6	1	-0.6	1.225	-0.6	1	-0.6	0.025	-0.6		-0.6		-0.6	0.49375	-0.6	0.725	-0.6	0.3375	-0.6	1.0625	-0.6	0.5125	-0.6	0.2875	-0.6	0.025	-0.6	0.0625	-0.6
	-0.55	0.25	-0.55	0.0833333	-0.55	0.166667	-0.55	0.2	-0.55	0.55	-0.55	0.85	-0.55	1.125	-0.55	0.35	-0.55	0	-0.55	0.9	-0.55	1	-0.55	1.2	-0.55	1	-0.55	0.075	-0.55		-0.55		-0.55	0.5	-0.55	0.7	-0.55	0.45	-0.55	1.05	-0.55	0.5	-0.55	0.25	-0.55	4.47035e-08	-0.55	0.075	-0.55
	-0.5	0.416667	-0.5	0	-0.5	0.0833334	-0.5	0.0499999	-0.5	0.55	-0.5	0.95	-0.5	1.225	-0.5	0.4	-0.5	0	-0.5	0.95	-0.5	1.025	-0.5	1.175	-0.5	1	-0.5	0.125	-0.5		-0.5		-0.5	0.53125	-0.5	0.65	-0.5	0.5	-0.5	1.15	-0.5	0.525	-0.5	0.25	-0.5	0.0250001	-0.5	0.1	-0.5
	-0.45	0.5	-0.45	5.96046e-08	-0.45	0.25	-0.45	0	-0.45	0.65	-0.45	0.95	-0.45	1.4	-0.45	0.45	-0.45	0	-0.45	0.9	-0.45	1.1	-0.45	1.1	-0.45	1	-0.45	0.15	-0.45	0.2125	-0.45	0.2125	-0.45	0.625	-0.45	0.7	-0.45	0.525	-0.45	1.175	-0.45	0.6	-0.45	0.35	-0.45	0.1	-0.45	0.125	-0.45
	-0.4	0.416667	-0.4	0.0833335	-0.4	0.25	-0.4	0	-0.4	0.7875	-0.4	0.925	-0.4	1.675	-0.4	0.525	-0.4	0	-0.4	0.85	-0.4	1.15	-0.4	1.025	-0.4	1	-0.4	0.1	-0.4	0.25	-0.4	0.1625	-0.4	0.725	-0.4	0.78125	-0.4	0.575	-0.4	1.125	-0.4	0.6875	-0.4	0.5	-0.4	0.175	-0.4	0.13125	-0.4
	-0.35	0.333333	-0.35	0.25	-0.35	0.166667	-0.35	0	-0.35	0.9	-0.35	0.95	-0.35	1.875	-0.35	0.65	-0.35	4.02331e-08	-0.35	0.9	-0.35	1.1	-0.35	1	-0.35	1	-0.35	0.1	-0.35	0.25	-0.35	0.15	-0.35	0.775	-0.35	0.825	-0.35	0.575	-0.35	1.125	-0.35	0.75	-0.35	0.65	-0.35	0.2	-0.35	0.0999999	-0.35
	-0.3	0.416667	-0.3	0.333333	-0.3	0.25	-0.3	0	-0.3	0.975	-0.3	0.9875	-0.3	1.975	-0.3	0.725	-0.3	0.0125001	-0.3	0.975	-0.3	1.025	-0.3	1.075	-0.3	1	-0.3	0.175	-0.3	0.2	-0.3	0.225	-0.3	0.825	-0.3	0.85625	-0.3	0.525	-0.3	1.025	-0.3	0.8	-0.3	0.775	-0.3	0.2	-0.3	0.0625	-0.3
	-0.25	0.416667	-0.25	0.416667	-0.25	0.416667	-0.25	0	-0.25	1	-0.25	1	-0.25	1.975	-0.25	0.65	-0.25	0.0500001	-0.25	1	-0.25	1	-0.25	1.3	-0.25	1	-0.25	0.15	-0.25	0.1625	-0.25	0.3375	-0.25	0.925	-0.25	0.9	-0.25	0.5875	-0.25	0.9625	-0.25	0.85	-0.25	0.85	-0.25	0.2	-0.25	0.05	-0.25
	-0.2	0.25	-0.2	0.416667	-0.2	0.583333	-0.2	0	-0.2	1	-0.2	1	-0.2	1.925	-0.2	0.525	-0.2	0.0749999	-0.2	1	-0.2	1	-0.2	1.55	-0.2	1	-0.2	0.075	-0.2	0.225	-0.2	0.3875	-0.2	1.0125	-0.2	0.94375	-0.2	0.725	-0.2	1.025	-0.2	0.8625	-0.2	0.875	-0.2	0.225	-0.2	0.0625001	-0.2
	-0.15	0.416667	-0.15	0.416667	-0.15	0.666667	-0.15	0	-0.15	1	-0.15	1	-0.15	1.9	-0.15	0.45	-0.15	0.0499999	-0.15	1	-0.15	1	-0.15	1.7	-0.15	1	-0.15	0.0500001	-0.15	0.2875	-0.15	0.3125	-0.15	1.025	-0.15	0.975	-0.15	0.8375	-0.15	1.0875	-0.15	0.8	-0.15	0.85	-0.15	0.3	-0.15	0.1	-0.15
	-0.1	0.75	-0.1	0.583333	-0.1	0.666667	-0.1	0	-0.1	1	-0.1	1	-0.1	1.9	-0.1	0.4375	-0.1	0.025	-0.1	0.975	-0.1	1	-0.1	1.775	-0.1	1	-0.1	0.1	-0.1	0.275	-0.1	0.2375	-0.1	1.00625	-0.1	0.96875	-0.1	0.9125	-0.1	1.175	-0.1	0.7375	-0.1	0.825	-0.1	0.325	-0.1	0.14375	-0.1
	-0.05	0.666666	-0.05	0.583333	-0.05	0.666667	-0.05	0	-0.05	1	-0.05	1	-0.05	1.925	-0.05	0.5	-0.05	0.05	-0.05	0.9	-0.05	1	-0.05	1.8	-0.05	1	-0.05	0.15	-0.05	0.2625	-0.05	0.2625	-0.05	1	-0.05	0.9	-0.05	0.9	-0.05	1.2	-0.05	0.75	-0.05	0.85	-0.05	0.2	-0.05	0.175	-0.05
	0	0.583333	0	0.5	0	0.583333	0	0.025	0	1.025	0	1	0	1.95	0	0.5875	0	0.0749999	0	0.825	0	0.95	0	1.775	0	1	0	0.125	0	0.2625	0	0.3875	0	1.0125	0	0.8625	0	0.9375	0	1.15	0	0.775	0	0.8875	0	0.0750002	0	0.1875	0
	0.05	0.75	0.05	0.583334	0.05	0.5	0.05	0.0999999	0.05	1.1	0.05	1	0.05	1.925	0.05	0.65	0.05	0.05	0.05	0.8	0.05	0.8	0.05	1.7	0.05	1	0.05	0.1	0.05	0.2375	0.05	0.45	0.05	1.05	0.05	0.95	0.05	1	0.05	1.1375	0.05	0.75	0.05	0.9	0.05	0.1	0.05	0.175	0.05
	0.1	0.833333	0.1	0.75	0.1	0.5	0.1	0.15	0.1	1.1625	0.1	1	0.1	1.875	0.1	0.6625	0.1	0.0250001	0.1	0.825	0.1	0.675	0.1	1.625	0.1	1	0.1	0.1	0.1	0.275	0.1	0.35	0.1	1.06875	0.1	1.025	0.1	0.975	0.1	1.1875	0.1	0.7125	0.1	0.8625	0.1	0.15	0.1	0.16875	0.1
	0.15	0.916667	0.15	0.75	0.15	0.5	0.15	0.0999997	0.15	1.15	0.15	1	0.15	1.825	0.15	0.6	0.15	0.0500001	0.15	0.9	0.15	0.7	0.15	1.6	0.15	1	0.15	0.125	0.15	0.3125	0.15	0.2875	0.15	1.025	0.15	0.95	0.15	0.9375	0.15	1.25	0.15	0.7	0.15	0.75	0.15	0.0999999	0.15	0.2	0.15
	0.2	1	0.2	0.75	0.2	0.666667	0.2	0.0249999	0.2	1.1	0.2	1	0.2	1.825	0.2	0.55	0.2	0.0749999	0.2	0.95	0.2	0.775	0.2	1.575	0.2	1	0.2	0.15	0.2	0.225	0.2	0.3375	0.2	0.96875	0.2	0.825	0.2	0.925	0.2	1.25	0.2	0.65	0.2	0.6125	0.2	0.0500001	0.2	0.20625	0.2
	0.25	1	0.25	0.833333	0.25	0.833333	0.25	0	0.25	1.05	0.25	1	0.25	1.85	0.25	0.6	0.25	0.0499999	0.25	0.9	0.25	0.8	0.25	1.5	0.25	1	0.25	0.125	0.25	0.1375	0.25	0.3625	0.25	0.95	0.25	0.75	0.25	0.95	0.25	1.1875	0.25	0.5	0.25	0.5	0.25	0.1	0.25	0.125	0.25
	0.3	0.916666	0.3	0.833333	0.3	0.75	0.3	0	0.3	1.0375	0.3	0.9875	0.3	1.75	0.3	0.625	0.3	0.0250001	0.3	0.85	0.3	0.825	0.3	1.45	0.3	1	0.3	0.0749999	0.3	0.1375	0.3	0.35	0.3	0.93125	0.3	0.6875	0.3	0.925	0.3	1.1375	0.3	0.3375	0.3	0.4625	0.3	0.15	0.3	0.0312499	0.3
	0.35	0.75	0.35	0.833333	0.35	0.666667	0.35	0	0.35	1.1	0.35	0.95	0.35	1.6	0.35	0.5	0.35	0.0500001	0.35	0.9	0.35	0.9	0.35	1.5	0.35	1	0.35	0.025	0.35	0.1375	0.35	0.2875	0.35	0.875	0.35	0.6	0.35	0.8625	0.35	1.15	0.35	0.25	0.35	0.55	0.35	0.0999999	0.35	1.78814e-08	0.35
	0.4	0.666667	0.4	0.833333	0.4	0.666667	0.4	0	0.4	1.1125	0.4	0.925	0.4	1.525	0.4	0.375	0.4	0.0749999	0.4	0.975	0.4	0.975	0.4	1.525	0.4	1	0.4	0.0500001	0.4	0.1	0.4	0.1625	0.4	0.81875	0.4	0.55625	0.4	0.8375	0.4	1.1875	0.4	0.2375	0.4	0.6375	0.4	0.0750004	0.4	0.00625005	0.4
	0.45	0.583333	0.45	0.916667	0.45	0.75	0.45	0	0.45	0.949999	0.45	0.95	0.45	1.4	0.45	0.4	0.45	0.0499998	0.45	1	0.45	1	0.45	1.4	0.45	1	0.45	0.0999999	0.45		0.45		0.45	0.8	0.45	0.625	0.45	0.825	0.45	1.1625	0.45	0.3	0.45	0.6	0.45	0.2	0.45	0.0250001	0.45
	0.5	0.583334	0.5	0.916667	0.5	0.833333	0.5	0	0.5	0.75	0.5	0.9875	0.5	1.275	0.5	0.4875	0.5	0.0124999	0.5	1	0.5	0.95	0.5	1.275	0.5	1	0.5	0.0499999	0.5		0.5		0.5	0.79375	0.5	0.7125	0.5	0.75	0.5	1.1	0.5	0.3625	0.5	0.525	0.5	0.35	0.5	0.0500001	0.5
	0.55	0.75	0.55	0.833333	0.55	0.75	0.55	0	0.55	0.65	0.55	1	0.55	1.175	0.55	0.55	0.55	5.36442e-08	0.55	1	0.55	0.8	0.55	1.3	0.55	1	0.55	4.76837e-08	0.55		0.55		0.55	0.775	0.55	0.725	0.55	0.5875	0.55	1.075	0.55	0.35	0.55	0.5	0.55	0.4	0.55	0.0750001	0.55
	0.6	0.75	0.6	0.833333	0.6	0.666667	0.6	0	0.6	0.6	0.6	0.9875	0.6	1.05	0.6	0.575	0.6	0.0125002	0.6	0.95	0.6	0.65	0.6	1.35	0.6	1	0.6	0.0250001	0.6		0.6		0.6	0.75625	0.6	0.6875	0.6	0.5375	0.6	1.05	0.6	0.3125	0.6	0.5125	0.6	0.4	0.6	0.1	0.6
	0.65	0.666667	0.65	0.666666	0.65	0.75	0.65	0	0.65	0.55	0.65	0.95	0.65	0.975	0.65	0.55	0.65	0.0500002	0.65	0.8	0.65	0.6	0.65	1.3	0.65	1	0.65	0.1	0.65		0.65		0.65	0.75	0.65	0.625	0.65	0.55	0.65	0.9125	0.65	0.3	0.65	0.55	0.65	0.4	0.65	0.125	0.65
	0.7	0.666667	0.7	0.416667	0.7	0.916666	0.7	0	0.7	0.4875	0.7	0.862499	0.7	0.925	0.7	0.462499	0.7	0.0875001	0.7	0.625	0.7	0.625	0.7	1.325	0.7	1	0.7	0.175	0.7		0.7		0.7	0.7625	0.7	0.575	0.7	0.4625	0.7	0.725	0.7	0.325	0.7	0.5625	0.7	0.4	0.7	0.14375	0.7
	0.75	0.666667	0.75	0.416667	0.75	0.833333	0.75	0	0.75	0.4	0.75	0.699999	0.75	0.85	0.75	0.299999	0.75	0.1	0.75	0.5	0.75	0.7	0.75	1.6	0.75	1	0.75	0.175	0.75		0.75		0.75	0.8	0.75	0.575	0.75	0.4125	0.75	0.725	0.75	0.4	0.75	0.5	0.75	0.4	0.75	0.15	0.75
	0.8	0.666667	0.8	0.583333	0.8	0.583334	0.8	0	0.8	0.35	0.8	0.55	0.8	0.675	0.8	0.15	0.8	0.1	0.8	0.475	0.8	0.725	0.8	1.825	0.8	1	0.8	0.0999998	0.8		0.8		0.8	0.825	0.8	0.58125	0.8	0.4375	0.8	0.825	0.8	0.4875	0.8	0.4625	0.8	0.375	0.8	0.14375	0.8
	0.85	0.666667	0.85	0.583333	0.85	0.666667	0.85	0	0.85	0.4	0.85	0.5	0.85	0.55	0.85	0.0999999	0.85	0.0999999	0.85	0.6	0.85	0.599999	0.85	1.7	0.85	1	0.85	0.0249999	0.85		0.85		0.85	0.8	0.85	0.55	0.85	0.45	0.85	0.8	0.85	0.55	0.85	0.55	0.85	0.3	0.85	0.125	0.85
	0.9	0.75	0.9	0.5	0.9	0.749999	0.9	0	0.9	0.4875	0.9	0.5125	0.9	0.675	0.9	0.0874998	0.9	0.0874998	0.9	0.725	0.9	0.399999	0.9	1.5	0.9	1	0.9	0	0.9		0.9		0.9	0.75	0.9	0.5125	0.9	0.4375	0.9	0.7125	0.9	0.55	0.9	0.6625	0.9	0.25	0.9	0.1125	0.9
	0.95		0.95		0.95		0.95	0	0.95	0.55	0.95	0.55	0.95		0.95	0.0499998	0.95	0.0499998	0.95	0.7	0.95	0.2	0.95	1.5	0.95	1	0.95		0.95		0.95		0.95	0.7	0.95	0.5	0.95		0.95		0.95	0.45	0.95	0.7	0.95	0.3	0.95	0.125	0.95
	1		1		1		1	0	1	0.55	1	0.6	1		1	0.0124999	1	0.0124999	1	0.625	1	0.0750001	1	1.625	1	0.975	1		1		1		1	0.675	1	0.5	1		1		1	0.375	1	0.7125	1	0.35	1	0.1375	1
	1.05		1.05		1.05		1.05	1.2219e-07	1.05	0.45	1.05	0.65	1.05		1.05	1.2219e-07	1.05	0	1.05	0.6	1.05	0.1	1.05	1.8	1.05	0.9	1.05		1.05		1.05		1.05	0.7	1.05	0.5	1.05		1.05		1.05	0.45	1.05	0.75	1.05	0.3	1.05	0.125	1.05
	1.1		1.1		1.1		1.1	0.0250004	1.1	0.375	1.1	0.65	1.1		1.1	0.0250004	1.1	0	1.1	0.55	1.1	0.2	1.1	1.85	1.1	0.8	1.1		1.1		1.1		1.1	0.71875	1.1	0.50625	1.1		1.1		1.1	0.5375	1.1	0.724999	1.1	0.2	1.1	0.0999999	1.1
	1.15		1.15		1.15		1.15	0.1	1.15	0.45	1.15	0.55	1.15		1.15	0.1	1.15	6.25849e-08	1.15	0.4	1.15	0.3	1.15	1.6	1.15	0.7	1.15		1.15		1.15		1.15	0.675	1.15	0.525	1.15		1.15		1.15	0.5	1.15	0.549999	1.15	0.0999999	1.15	0.075	1.15
	1.2		1.2		1.2		1.2	0.15	1.2	0.5375	1.2	0.4625	1.2		1.2	0.15	1.2	0.0125002	1.2	0.25	1.2	0.35	1.2	1.325	1.2	0.65	1.2		1.2		1.2		1.2	0.64375	1.2	0.53125	1.2		1.2		1.2	0.4125	1.2	0.375	1.2	0.0750005	1.2	0.0625	1.2
	1.25		1.25		1.25		1.25	0.0999996	1.25	0.5	1.25	0.5	1.25		1.25	0.0999997	1.25	0.0500001	1.25	0.2	1.25	0.3	1.25	1.3	1.25	0.7	1.25		1.25		1.25		1.25	0.7	1.25	0.5	1.25		1.25		1.25	0.35	1.25	0.35	1.25	0.2	1.25	0.075	1.25
	1.3		1.3		1.3		1.3	0.0249999	1.3	0.4375	1.3	0.524999	1.3		1.3	0.0375001	1.3	0.0749999	1.3	0.175	1.3	0.2	1.3	1.425	1.3	0.8	1.3		1.3		1.3		1.3	0.7625	1.3	0.48125	1.3		1.3		1.3	0.3375	1.3	0.462501	1.3	0.3	1.3	0.0875	1.3
	1.35		1.35		1.35		1.35	0	1.35	0.45	1.35	0.4	1.35		1.35	0.0500001	1.35	0.0499998	1.35	0.0999998	1.35	0.0999999	1.35	1.6	1.35	0.9	1.35		1.35		1.35		1.35	0.75	1.35	0.525	1.35		1.35		1.35	0.4	1.35	0.700001	1.35	0.2	1.35	0.075	1.35
	1.4		1.4		1.4		1.4	0	1.4	0.4875	1.4	0.337501	1.4		1.4	0.0749999	1.4	0.0124999	1.4	0.0500002	1.4	0.0750004	1.4	1.725	1.4	0.975	1.4		1.4		1.4		1.4	0.71875	1.4	0.5875	1.4		1.4		1.4	0.475	1.4	0.8875	1.4	0.0750001	1.4	0.0750002	1.4
	1.45		1.45		1.45		1.45	0	1.45	0.5	1.45	0.550001	1.45		1.45	0.0499998	1.45	6.70552e-08	1.45		1.45		1.45		1.45		1.45		1.45		1.45		1.45	0.725	1.45	0.625	1.45		1.45		1.45	0.5	1.45	0.849999	1.45	0.1	1.45	0.125	1.45
	1.5		1.5		1.5		1.5	0	1.5	0.5	1.5	0.812499	1.5		1.5	0.0124999	1.5	2.01166e-07	1.5		1.5		1.5		1.5		1.5		1.5		1.5		1.5	0.743749	1.5	0.64375	1.5		1.5		1.5	0.5	1.5	0.7375	1.5	0.175	1.5	0.18125	1.5
[truncated: 1 more columns]
