# Supplementary material for: Glycinergic axonal inhibition subserves acute spatial sensitivity to sudden increases in sound intensity
Source: eLife journal article supplement (doi:10.7554/elife.62183), 2021-06-14
Supplement: supp [file elife-62183-supp-v1.zip › elife_poa_e62183_Figure_1_figure_supplement_3_source_data_1.xlsx]

## Sheet: panel A
	40 dB		60 dB		80 dB
	ITD (ms)	Spikes/click	ITD (ms)	Spikes/click	ITD (ms)	Spikes/click
	-1.5	0.4	-1.5	1	-2	1
	-1.45	0.9	-1.45	0.9	-1.95	1
	-1.4	0.6	-1.4	0.8	-1.9	1
	-1.35	0.5	-1.35	1	-1.85	1
	-1.3	0.7	-1.3	0.7	-1.8	1
	-1.25	0.7	-1.25	0.7	-1.75	1
	-1.2	0.8	-1.2	0.9	-1.7	1
	-1.15	0.4	-1.15	0.8	-1.65	1
	-1.1	0.4	-1.1	0.9	-1.6	1
	-1.05	0.4	-1.05	0.9	-1.55	1
	-1	0.6	-1	0.9	-1.5	1
	-0.95	0.4	-0.95	0.5	-1.45	1
	-0.9	0.1	-0.9	0.5	-1.4	1
	-0.85	0.2	-0.85	0.5	-1.35	1
	-0.8	0.1	-0.8	0.2	-1.3	1
	-0.75	0.2	-0.75	0.3	-1.25	1
	-0.7	0.2	-0.7	0.2	-1.2	1
	-0.65	0	-0.65	0	-1.15	1
	-0.6	0	-0.6	0.1	-1.1	1
	-0.55	0	-0.55	0	-1.05	1
	-0.5	0.1	-0.5	0	-1	1
	-0.45	0	-0.45	0	-0.95	1
	-0.4	0	-0.4	0	-0.9	1
	-0.35	0	-0.35	0	-0.85	1
	-0.3	0	-0.3	0	-0.8	1
	-0.25	0	-0.25	0	-0.75	1
	-0.2	0	-0.2	0	-0.7	1
	-0.15	0	-0.15	0	-0.65	1
	-0.1	0	-0.1	0	-0.6	1
	-0.05	0	-0.05	0	-0.55	0.6
	0	0	0	0	-0.5	1
	0.05	0	0.05	0	-0.45	0.2
	0.1	0	0.1	0	-0.4	0
	0.15	0	0.15	0	-0.35	0
	0.2	0	0.2	0	-0.3	0
	0.25	0	0.25	0	-0.25	0
	0.3	0	0.3	0	-0.2	0
	0.35	0	0.35	0	-0.15	0
	0.4	0	0.4	0	-0.1	0
	0.45	0	0.45	0	-0.05	0
	0.5	0	0.5	0	0	0
	0.55	0	0.55	0	0.05	0
	0.6	0	0.6	0	0.1	0
	0.65	0	0.65	0	0.15	0
	0.7	0	0.7	0.1	0.2	0
	0.75	0	0.75	0	0.25	0
	0.8	0	0.8	0	0.3	0
	0.85	0	0.85	0	0.35	0
	0.9	0	0.9	0	0.4	0
	0.95	0	0.95	0	0.45	0
	1	0	1	0	0.5	0
	1.05	0	1.05	0.1	0.55	0
	1.1	0.1	1.1	0.5	0.6	0
	1.15	0	1.15	0.3	0.65	0.2
	1.2	0.1	1.2	0.5	0.7	0
	1.25	0.3	1.25	0.4	0.75	0.2
	1.3	0.2	1.3	0.6	0.8	0.4
	1.35	0.2	1.35	0.5	0.85	0.8
	1.4	0.5	1.4	0.5	0.9	1
	1.45	0.5	1.45	1	0.95	1
	1.5	0.4	1.5	0.7	1	1
					1.05	1
					1.1	1
					1.15	0.8
					1.2	0.6
					1.25	1
					1.3	0.8
					1.35	1
					1.4	1
					1.45	1
					1.5	1
					1.55	1
					1.6	1
					1.65	1
					1.7	1
					1.75	0.6
					1.8	0.4
					1.85	1
					1.9	0.8
					1.95	0.6
					2	0.8

## Sheet: panel B
	70 dB		80 dB
	ITD (ms)	Spikes/click	ITD (ms)	Spikes/click
	-2	0.7	-2	1
	-1.9	0.8	-1.9	1
	-1.8	0.8	-1.8	1
	-1.7	1	-1.7	1
	-1.6	0.6	-1.6	1
	-1.5	0.7	-1.5	1
	-1.4	0.7	-1.4	1
	-1.3	0.7	-1.3	1
	-1.2	0.8	-1.2	1
	-1.1	0.9	-1.1	1
	-1	0.8	-1	1
	-0.9	0.7	-0.9	1
	-0.8	0.7	-0.8	1
	-0.7	0.3	-0.7	1.1
	-0.6	0	-0.6	1
	-0.5	0	-0.5	0.4
	-0.4	0	-0.4	0.2
	-0.3	0	-0.3	0
	-0.2	0	-0.2	0
	-0.1	0	-0.1	0
	0	0	0	0.2
	0.1	0	0.1	0.4
	0.2	0	0.2	0.8
	0.3	0	0.3	1
	0.4	0.1	0.4	1
	0.5	0.3	0.5	1
	0.6	0.4	0.6	1
	0.7	0.4	0.7	1
	0.8	0.9	0.8	1
	0.9	0.9	0.9	1
	1	0.7	1	1
	1.1	0.9	1.1	1
	1.2	0.8	1.2	1
	1.3	1	1.3	1
	1.4	0.9	1.4	1
	1.5	1	1.5	1
	1.6	1	1.6	1
	1.7	1	1.7	1
	1.8	1	1.8	1
	1.9	1	1.9	1
	2	1	2	1

## Sheet: panel C
		LSO - principal			LSO - non principal			MSO
		Sound level (dB)	ITD SNR		Sound level (dB)	ITD SNR		Sound level (dB)	ITD SNR
		40	0.84		60	0.29		50	0.3784
		40	0.8613		60	0.1615		30	0.2247
		40	0.5381		50	0.3835		70	0.5743
		40	0.4259		30	0.1789		60	0.2253
		60	0.6216		50	0.4074		40	0.0773
		50	0.747		80	0.4526		80	0.0761
		50	0.6907		55	0.0395		80	0.0665
		40	0.5812		80	0.078		100	0.0886
		40	0.5077		55	0.0137		90	0.1392
		70	0.6512		55	0.2288		70	0.1609
		55	0.7221		90	0.2196		70	0.2726
		60	0.471		90	0.1571		40	0.1352
		60	0.6817		70	0.3214		50	0.0942
		70	0.6062		70	0.2124		70	0.1719
		80	0.8		50	0.5505		30	0.0448
		55	0.493		40	0.57		30	0.0462
					80	0.1361
					30	0.4147
					70	0.4987
					50	0.6268
					50	0.4564
					60	0.8554
					40	0.3866
					50	0.5887
					50	0.3315
					60	0.672
					55	0.7118
					50	0.2968
					70	0.3576
					40	0.5747
					60	0.574
					80	0.5041
					60	0.6761
					70	0.6277

## Sheet: panel D
		LSO - principal			LSO - non principal			MSO
		Sound level re. threshold	ITD SNR		Sound level re. threshold	ITD SNR		Sound level re. threshold	ITD SNR
		16.9897	0.5381		50	0.3835		35	0.3784
		16.9897	0.4259		30	0.1789		15	0.2247
		36.9897	0.6216		30	0.4074		55	0.5743
		26.9897	0.747		60	0.4526		60	0.0761
		26.9897	0.6907		30	0.0395		60	0.0665
		45	0.471		55	0.078		80	0.0886
		45	0.6817		30	0.0137		35	0.1392
		36	0.6062		30	0.2288		15	0.1609
		46	0.8		85	0.2196		70	0.2726
		35	0.493		85	0.1571		40	0.1352
					65	0.3214		54	0.0942
					65	0.2124		74	0.1719
					45	0.5505
					35	0.57
					75	0.1361
					25	0.4147
					70	0.4987
					50	0.6268
					50	0.4564
					60	0.8554
					40	0.3866
					50	0.5887
					50	0.3315
					60	0.672
					55	0.7118
					20	0.2968
					40	0.3576
					30	0.5747
					50	0.574
					70	0.5041
					50	0.6761
					56	0.6277
