# Supplementary material for: Glycinergic axonal inhibition subserves acute spatial sensitivity to sudden increases in sound intensity
Source: eLife journal article supplement (doi:10.7554/elife.62183), 2021-06-14
Supplement: supp [file elife-62183-supp-v1.zip › elife_poa_e62183_Figure_1_figure_supplement_4_source_data_1.xlsx]

## Sheet: panel A
	Cell 1					Cell 2					Cell 3					Cell 4											Cell 5							Cell6					Cell 7					Cell 8
	ITD (ms)	Noise response (spikes/s)	ITD (ms)	Spikes/click		ITD (ms)	Noise response (spikes/s)	ITD (ms)	Spikes/click		ITD (ms)	Noise response (spikes/s)	ITD (ms)	Spikes/click		ITD (ms)	Noise response 1 (spikes/s)	ITD (ms)	Noise response 2 (spikes/s)	ITD (ms)	Noise response 3 (spikes/s)	ITD (ms)	Noise response 4 (spikes/s)	ITD (ms)	Spikes/click		ITD (ms)	Noise response (spikes/s)	ITD (ms)	Spikes/click	ITD (ms)	Spikes/click		ITD (ms)	Noise response (spikes/s)	ITD (ms)	Spikes/click		ITD (ms)	Noise response (spikes/s)	ITD (ms)	Spikes/click		ITD (ms)	Noise response 1 (spikes/s)	ITD (ms)	Noise response 2 (spikes/s)	ITD (ms)	Spikes/click
	-2	1	-2	0.85		-3	3.3333	-3	0.95		-2	0	-1.5	1		-1	23.8	-1	5.6	-0.7	3.4	-1	2.8	-2	1		-2	2.3333	-2	0.9091	-2	1		-3	10.8333	-2	0.6875		-1	2	-0.5	1		-2	0.2	-2	0.125	-1.5	0.95
	-1.9	0.6667	-1.9	0.7333		-2.9	4.6667	-2.9	0.75		-1.9	0	-1.45	1		-0.9	20.4	-0.9	4.6	-0.6	4.2	-0.9	3.6	-1.8	1		-1.9	8.3333	-1.95	0.9091	-1.9	1		-2.8	9.6667	-1.95	0.625		-0.9	2	-0.475	1		-1.8	0.4	-1.9	0.0625	-1.45	1
	-1.8	0.3333	-1.8	0.6667		-2.8	2	-2.8	0.75		-1.8	0	-1.4	0.95		-0.8	20	-0.8	5.4	-0.5	3	-0.8	2.8	-1.6	1		-1.8	4	-1.9	0.9091	-1.8	1		-2.6	11.8333	-1.9	0.6875		-0.8	1	-0.45	1		-1.7	0	-1.8	0.0625	-1.4	0.95
	-1.7	0.6667	-1.7	0.85		-2.7	2	-2.7	0.9		-1.7	0	-1.35	0.95		-0.7	17.4	-0.7	4	-0.4	2.8	-0.7	3.2	-1.4	0.95		-1.7	2.6667	-1.85	0.9091	-1.7	1		-2.4	14.1667	-1.85	0.6875		-0.7	1.3333	-0.425	0.9		-1.6	0.1	-1.7	0.0625	-1.35	0.9
	-1.6	0.6667	-1.6	1		-2.6	1.6667	-2.6	0.8		-1.6	0	-1.3	0.95		-0.6	18	-0.6	2.8	-0.3	2	-0.6	1.4	-1.2	1		-1.6	1.6667	-1.8	0.9091	-1.6	1		-2.2	11	-1.8	0.625		-0.6	1.6667	-0.4	0.8		-1.4	0.2	-1.6	0.125	-1.3	0.75
	-1.5	1.6667	-1.5	0.9833		-2.5	3.6667	-2.5	1		-1.5	0	-1.25	0.95		-0.5	17.6	-0.5	2.2	-0.2	2	-0.5	1.4	-1	1		-1.4	6.6667	-1.75	0.9091	-1.5	1		-2	15.1667	-1.75	0.625		-0.5	0.3333	-0.375	0.7		-1.2	0	-1.5	0.0625	-1.25	0.85
	-1.4	0.3333	-1.4	0.95		-2.4	2.6667	-2.4	1		-1.4	0	-1.2	1		-0.4	14	-0.4	4.6	-0.1	2.4	-0.4	1.6	-0.8	1		-1.3	2	-1.7	0.9091	-1.4	1		-1.8	14.3333	-1.7	0.6875		-0.4	1.3333	-0.35	0.8		-1.1	0	-1.4	0.125	-1.2	0.65
	-1.3	1.3333	-1.3	0.9667		-2.3	9.3333	-2.3	0.85		-1.3	0	-1.15	0.95		-0.3	14.6	-0.3	3.2	0	2.8	-0.3	2.4	-0.6	0.95		-1.2	5.6667	-1.65	0.9091	-1.3	1		-1.6	16.5	-1.65	0.625		-0.3	0.3333	-0.325	0.9		-1	0	-1.3	0.0625	-1.15	0.75
	-1.2	0.3333	-1.2	0.9		-2.2	4	-2.2	0.9		-1.2	0	-1.1	0.9		-0.2	14.4	-0.2	2.4	0.1	2.4	-0.2	1.6	-0.4	0.05		-1.1	1.6667	-1.6	0.9091	-1.2	1		-1.4	17.3333	-1.6	0.625		-0.2	0.3333	-0.3	0.7		-0.6	0	-1.2	0.0625	-1.1	0.95
	-1.1	0.3333	-1.1	0.7333		-2.1	2.3333	-2.1	0.85		-1.1	0	-1.05	0.85		-0.1	13.8	-0.1	3.2	0.2	3.6	-0.1	2.2	-0.2	0		-1	5.3333	-1.55	0.9091	-1.1	1		-1.2	15	-1.55	0.6875		-0.1	0.3333	-0.275	0.6		-0.3	0	-1.1	0	-1.05	0.8
	-1	0.6667	-1	0.75		-2	2.6667	-2	0.95		-1	1.3333	-1	0.7		0	10.4	0	2.2	0.3	3.6	0	2.8	0	0.05		-0.9	2	-1.5	0.9091	-1	1		-1	8.8182	-1.5	0.6875		0	0.3333	-0.25	0.7		-0.1	0	-1	0.125	-1	0.6
	-0.9	1	-0.9	0.5667		-1.9	4.3333	-1.9	0.95		-0.9	0	-0.95	0.75		0.1	9.4	0.1	1.4	0.4	4.6	0.1	3.2	0.2	0.2		-0.7	3.3333	-1.45	0.9091	-0.9	1		-0.9	5.4	-1.45	0.6875		0.1	0	-0.225	0.5		0	0	-0.9	0.0625	-0.95	0.8
	-0.8	1	-0.8	0.3833		-1.8	3.6667	-1.8	0.85		-0.8	0	-0.9	0.85		0.2	10.2	0.2	1.8	0.5	4.6	0.2	3.4	0.4	0.05		-0.6	5	-1.4	1	-0.8	1		-0.8	8.5455	-1.4	0.6875		0.2	0	-0.2	0.7		0.2	0	-0.8	0	-0.9	0.7
	-0.7	1.3333	-0.7	0.2167		-1.7	7.6667	-1.7	0.95		-0.7	0	-0.85	0.4		0.3	9	0.3	3.2	0.6	3.8	0.3	2.4	0.6	0.15		-0.4	2.6667	-1.35	0.9091	-0.7	1		-0.7	4.6	-1.35	0.6875		0.3	0	-0.175	0.7		0.3	0	-0.7	0.25	-0.85	0.85
	-0.6	1.6667	-0.6	0.0833		-1.6	1	-1.6	0.7		-0.6	0	-0.8	0.45		0.4	10.4	0.4	2.6	0.7	5.8	0.4	1.8	0.8	0.35		-0.3	0.6667	-1.3	0.9091	-0.6	1		-0.6	5.8182	-1.3	0.625		0.4	0	-0.15	0.1		0.5	0	-0.6	0	-0.8	0.2
	-0.5	1.6667	-0.5	0.0167		-1.5	3	-1.5	0.8		-0.5	0	-0.75	0.2		0.5	10	0.5	4.4	0.8	5.6	0.5	4.4				-0.1	2.3333	-1.25	0.9091	-0.5	0.9		-0.5	3	-1.25	0.625		0.5	0.6667	-0.125	0.7		0.6	0	-0.5	0.0625	-0.75	0.15
	-0.4	1	-0.4	0.05		-1.4	2	-1.4	0.8		-0.4	0	-0.7	0.15		0.6	10.8	0.6	2.4	0.9	4.8	0.6	3.8				0.1	3	-1.2	0.9091	-0.4	0.4		-0.4	4.3636	-1.2	0.75		0.6	0	-0.1	0.5		0.9	0	-0.4	0.125	-0.7	0.25
	-0.3	1.6667	-0.3	0		-1.3	0.6667	-1.3	0.75		-0.3	0	-0.65	0.1		0.7	11.8	0.7	3.4	1	6.8	0.7	3.8				0.3	0.3333	-1.15	0.9091	-0.3	0		-0.3	2	-1.15	0.6875		0.7	0.3333	-0.075	0		1	0	-0.3	0.0625	-0.65	0.1
	-0.2	1.3333	-0.2	0		-1.2	2.3333	-1.2	0.65		-0.2	0	-0.6	0.05		0.8	12.2	0.8	3.8			0.8	5.4				0.6	9	-1.1	0.9091	-0.2	0		-0.2	4.4545	-1.1	0.625		0.8	0.3333	-0.05	0.2		1.1	0	-0.2	0.0625	-0.6	0.15
	-0.1	0.6667	-0.1	0		-1.1	0.3333	-1.1	0.65		-0.1	0	-0.55	0		0.9	11.4	0.9	4			0.9	6.4				0.8	2	-1.05	0.9091	-0.1	0		-0.1	1.8	-1.05	0.75		0.9	0.3333	-0.025	0.1		1.2	0	-0.1	0	-0.55	0.1
	0	1	0	0		-1	0.6667	-1	0.5		0	0	-0.5	0		1	15.2	1	5.2			1	8.8				1	3	-1	0.9091	0	0		0	4.8182	-1	0.625		1	0	0	0.2		1.8	0	0	0	-0.5	0.1
	0.1	1.3333	0.1	0		-0.9	0	-1	0.75		0.1	0	-0.45	0													1.1	2.3333	-0.95	0.9091	0.1	0.3		0.1	2.8	-0.95	0.625				0.025	0		2	0	0.1	0.0625	-0.45	0.1
	0.2	1	0.2	0.0167		-0.8	0.1667	-0.95	0.45		0.2	0	-0.4	0													1.2	4.6667	-0.9	0.9091	0.2	0.7		0.2	3.6364	-0.9	0.625				0.05	0.2				0.2	0.0625	-0.4	0.05
	0.3	1	0.3	0.0833		-0.7	0.8333	-0.9	0.25		0.3	0	-0.35	0													1.3	1.6667	-0.85	0.9091	0.3	0.9		0.3	3	-0.85	0.75				0.075	0.2				0.3	0.0625	-0.35	0
	0.4	1	0.4	0.0167		-0.6	0.5	-0.9	0.35		0.4	0	-0.3	0													1.4	0.6667	-0.8	0.9091	0.4	1		0.4	3.4545	-0.8	0.75				0.1	0.5				0.4	0.0625	-0.3	0.05
	0.5	0.3333	0.5	0.2		-0.5	0.1667	-0.85	0.15		0.5	0	-0.25	0													1.6	4	-0.75	0.9091	0.5	1		0.5	1.8	-0.75	0.6875				0.125	0.1				0.5	0.0625	-0.25	0.05
	0.6	1.6667	0.6	0.25		-0.4	0.3333	-0.8	0		0.6	0	-0.2	0													1.7	4.3333	-0.7	0.9091	0.6	1		0.6	4.4545	-0.7	0.625				0.15	0.5				0.6	0.1875	-0.2	0
	0.7	1.3333	0.7	0.4833		-0.3	1	-0.8	0.2		0.7	0	-0.15	0													1.9	4	-0.65	0.9091	0.7	1		0.7	2.8	-0.65	0.6875				0.175	0.7				0.7	0.25	-0.15	0
	0.8	2	0.8	0.6333		-0.2	0.5	-0.75	0.15		0.8	0	-0.1	0															-0.6	0.9091	0.8	1		0.8	5.3636	-0.6	0.625				0.2	0.9				0.8	0.1875	-0.1	0.1
	0.9	1	0.9	0.7333		-0.1	0.3333	-0.7	0		0.9	0	-0.05	0															-0.55	0.9091	0.9	1		0.9	4	-0.55	0.625				0.225	0.8				0.9	0.25	-0.05	0
	1	2.6667	1	0.8		0	0.3333	-0.7	0		1	0	0	0															-0.5	0.9091	1	1		1	6	-0.5	0.3125				0.25	0.9				1	0.3125	0	0.1
	1.1	2	1.1	0.9333		0.1	1	-0.65	0		1.1	1.3333	0.05	0															-0.45	0.9091	1.1	1		1.2	7.6667	-0.45	0.5				0.275	0.4				1.1	0.3125	0.05	0
	1.2	3	1.2	0.85		0.2	1	-0.6	0		1.2	0	0.1	0															-0.4	0.7273	1.2	1		1.4	10.8333	-0.4	0.4375				0.3	1				1.2	0.1875	0.1	0.1
	1.3	2	1.3	0.9833		0.3	2.8333	-0.6	0		1.3	0	0.15	0															-0.35	0.2727	1.3	1		1.6	6.8333	-0.35	0.125				0.325	1				1.3	0.625	0.15	0.05
	1.4	4	1.4	0.8167		0.4	2.8333	-0.55	0		1.4	0	0.2	0															-0.3	0	1.4	1		1.8	7.8333	-0.3	0.1875				0.35	0.9				1.4	0.4375	0.2	0.15
	1.5	2.3333	1.5	0.9167		0.5	4	-0.5	0		1.5	0	0.25	0															-0.25	0	1.5	1		2	10	-0.25	0.125				0.375	1				1.5	0.6875	0.25	0.1
	1.6	5.6667	1.6	1		0.6	6	-0.5	0		1.6	0	0.3	0															-0.2	0	1.6	1		2.2	9	-0.2	0.1875				0.4	1				1.6	0.625	0.3	0.15
	1.7	7.3333	1.7	0.9833		0.7	7.1667	-0.45	0		1.7	0	0.35	0															-0.15	0	1.7	1		2.4	11.5	-0.15	0.0625				0.425	0.9				1.7	0.625	0.35	0.05
	1.8	10.6667	1.8	0.6333		0.8	7.6667	-0.4	0		1.8	0	0.4	0.05															-0.1	0	1.8	1		2.6	11.6667	-0.1	0.0625				0.45	0.9				1.8	0.3125	0.4	0.1
	1.9	13.6667	1.9	1		0.9	15.5	-0.4	0		1.9	0	0.45	0															-0.05	0	1.9	1		2.8	15.6667	-0.05	0				0.475	0.8				1.9	0.5	0.45	0.45
	2	15.6667	2	0.9667		1	16.6667	-0.35	0		2	0	0.5	0.1															0	0	2	1		3	18.3333	0	0				0.5	1				2	0.3125	0.5	0.45
						1.1	6	-0.3	0				0.55	0															0.05	0.0909						0.05	0											0.55	0.25
						1.2	6.3333	-0.3	0				0.6	0.15															0.1	0.3636						0.1	0.0625											0.6	0.65
						1.3	7	-0.25	0				0.65	0.05															0.15	0.6364						0.15	0											0.65	0.7
						1.4	7	-0.2	0				0.7	0.2															0.2	0.6364						0.2	0.125											0.7	0.9
						1.5	8.6667	-0.2	0				0.75	0.3															0.25	0.9091						0.25	0.0625											0.75	0.45
						1.6	6.6667	-0.15	0				0.8	0.2															0.3	0.9091						0.3	0.125											0.8	0.5
						1.7	6.6667	-0.1	0				0.85	0.1															0.35	0.8182						0.35	0.0625											0.85	0.9
						1.8	5.6667	-0.1	0.15				0.9	0.4															0.4	0.9091						0.4	0.1875											0.9	0.6
						1.9	7	-0.05	0.15				0.95	0.7															0.45	0.9091						0.45	0.1875											0.95	0.95
						2	6	0	0.25				1	0.55															0.5	0.9091						0.5	0.0625											1	0.8
						2.1	22.6667	0	0.1				1.05	0.65															0.55	0.9091						0.55	0.125											1.05	1
						2.2	7.3333	0.05	0.4				1.1	0.5															0.6	0.9091						0.6	0.1875											1.1	0.75
						2.3	6	0.1	0.8				1.15	0.65															0.65	0.9091						0.65	0.25											1.15	1
						2.4	7	0.1	0.7				1.2	0.65															0.7	0.9091						0.7	0.4375											1.2	0.95
						2.5	8	0.15	0.85				1.25	0.85															0.75	0.9091						0.75	0.625											1.25	0.9
						2.6	7.3333	0.2	0.8				1.3	0.8															0.8	0.9091						0.8	0.4375											1.3	0.9
						2.7	7.3333	0.2	0.85				1.35	0.95															0.85	0.9091						0.85	0.4375											1.35	0.8
						2.8	8	0.25	1				1.4	0.85															0.9	0.9091						0.9	0.3125											1.4	0.9
						2.9	5	0.3	1				1.45	0.85															0.95	0.9091						0.95	0.5625											1.45	0.9
						3	5.3333	0.3	0.95				1.5	0.9															1	0.9091						1	0.625											1.5	0.9
								0.35	1																											1.05	0.625
								0.4	1																											1.1	0.5625
								0.4	0.95																											1.15	0.5625
								0.45	1																											1.2	0.5625
								0.5	1																											1.25	0.625
								0.5	1																											1.3	0.5625
								0.55	1																											1.35	0.75
								0.6	1																											1.4	0.5625
								0.6	1																											1.45	0.625
								0.65	1																											1.5	0.6875
								0.7	1																											1.55	0.8125
								0.7	1																											1.6	0.625
								0.75	1																											1.65	0.6875
								0.8	1																											1.7	0.8125
								0.8	1																											1.75	0.875
								0.85	1																											1.8	0.6875
								0.9	1																											1.85	0.875
								0.9	1																											1.9	1
								0.95	1																											1.95	0.8125
								1	1																											2	0.875
								1	1
								1.1	1
								1.2	1
								1.3	1
								1.4	1
								1.5	1
								1.6	1
								1.7	1
								1.8	1
								1.9	1
								2	1
								2.1	1
								2.2	1
								2.3	1
								2.4	1
								2.5	1
								2.6	1
								2.7	1
								2.8	1
								2.9	1
								3	1

## Sheet: panel B
					Right panel						Left panel
					ITD (ms)	Bin. beat (spikes/s)	ITD (ms)	Spikes/click			ITD (ms)	Spikes/click	ITD (ms)	Bin. beat envelope (spikes/s)	ITD (ms)	Bin. beat envelope (spikes/s)	ITD (ms)	Bin. beat envelope (spikes/s)	ITD (ms)	Bin. beat envelope (spikes/s)	ITD (ms)	Bin. beat envelope (spikes/s)	ITD (ms)	Bin. beat envelope (spikes/s)	ITD (ms)	Bin. beat envelope (spikes/s)	ITD (ms)	Bin. beat envelope (spikes/s)	ITD (ms)	Bin. beat envelope (spikes/s)	ITD (ms)	Bin. beat envelope (spikes/s)	ITD (ms)	Bin. beat envelope (spikes/s)	ITD (ms)	Bin. beat envelope (spikes/s)	ITD (ms)	Bin. beat envelope (spikes/s)	ITD (ms)	Bin. beat envelope (spikes/s)	ITD (ms)	Bin. beat envelope (spikes/s)	ITD (ms)	Bin. beat envelope (spikes/s)	ITD (ms)	Bin. beat envelope (spikes/s)	ITD (ms)	Bin. beat envelope (spikes/s)	ITD (ms)
					-5.0748	54.1667	-2	1			-2	1	-6.68182	0	-6.68182	0	-5.36905	50	-5.36905	41.6667	-5.57527	83.3333	-5.57527	70.8333	-5.18598	4.16667	-5.18598	8.33333	-5.34706	83.3333	-5.34706	70.8333	-5.12432	72.9167	-5.12432	66.6667	-5.24849	112.5	-5.24849	70.8333	-5.09336	129.167	-5.09336	120.833	-5.19353	100	-5.19353	45.8333	-5.07475
					-4.8758	60.4167	-1.95	1			-1.8	1	-4.77273	0	-4.77273	0	-4.39286	8.33333	-4.39286	0	-4.91935	0	-4.91935	0	-4.69207	62.5	-4.69207	62.5	-4.95098	62.5	-4.95098	66.6667	-4.79372	85.4167	-4.79372	75	-4.96479	75	-4.96479	75	-4.84491	120.833	-4.84491	112.5	-4.97253	100	-4.97253	37.5	-4.87574
					-4.6768	58.3333	-1.9	1			-1.6	1	-4.77273	0	-4.77273	0	-4.39286	8.33333	-4.39286	0	-4.91935	0	-4.91935	0	-4.69207	62.5	-4.69207	62.5	-4.95098	62.5	-4.95098	66.6667	-4.79372	85.4167	-4.79372	75	-4.96479	75	-4.96479	75	-4.84491	120.833	-4.84491	112.5	-4.97253	100	-4.97253	37.5	-4.87574
					-4.4778	64.5833	-1.85	1			-1.4	0.95	-2.86364	31.25	-2.86364	0	-3.41667	0	-3.41667	4.16667	-4.26344	62.5	-4.26344	41.6667	-4.19817	58.3333	-4.19817	58.3333	-4.5549	54.1667	-4.5549	50	-4.46311	125	-4.46311	104.167	-4.68109	125	-4.68109	125	-4.59645	66.6667	-4.59645	54.1667	-4.75153	112.5	-4.75153	66.6667	-4.67673
					-4.2788	62.5	-1.8	1			-1.2	1	-2.86364	31.25	-2.86364	0	-3.41667	0	-3.41667	4.16667	-4.26344	62.5	-4.26344	41.6667	-4.19817	58.3333	-4.19817	58.3333	-4.5549	54.1667	-4.5549	50	-4.46311	125	-4.46311	104.167	-4.68109	125	-4.68109	125	-4.59645	66.6667	-4.59645	54.1667	-4.75153	112.5	-4.75153	66.6667	-4.67673
					-4.0797	54.1667	-1.75	1			-1	1	-2.86364	31.25	-2.86364	0	-3.41667	0	-3.41667	4.16667	-4.26344	62.5	-4.26344	41.6667	-4.19817	58.3333	-4.19817	58.3333	-4.5549	54.1667	-4.5549	50	-4.46311	125	-4.46311	104.167	-4.68109	125	-4.68109	125	-4.59645	66.6667	-4.59645	54.1667	-4.75153	112.5	-4.75153	66.6667	-4.67673
					-3.8807	33.3333	-1.7	1			-0.8	1	-0.954545	0	-0.954545	0	-2.44048	33.3333	-2.44048	20.8333	-3.60753	25	-3.60753	25	-3.70427	50	-3.70427	41.6667	-4.15882	58.3333	-4.15882	45.8333	-4.13251	56.25	-4.13251	37.5	-4.39738	70.8333	-4.39738	37.5	-4.34799	108.333	-4.34799	116.667	-4.53053	100	-4.53053	50	-4.47772
					-3.6817	39.5833	-1.65	1			-0.6	0.95	-0.954545	0	-0.954545	0	-2.44048	33.3333	-2.44048	20.8333	-3.60753	25	-3.60753	25	-3.70427	50	-3.70427	41.6667	-4.15882	58.3333	-4.15882	45.8333	-4.13251	56.25	-4.13251	37.5	-4.39738	70.8333	-4.39738	37.5	-4.34799	108.333	-4.34799	116.667	-4.53053	100	-4.53053	50	-4.47772
					-3.4827	35.4167	-1.6	1			-0.4	0.05	-0.954545	0	-0.954545	0	-2.44048	33.3333	-2.44048	20.8333	-3.60753	25	-3.60753	25	-3.70427	50	-3.70427	41.6667	-4.15882	58.3333	-4.15882	45.8333	-4.13251	56.25	-4.13251	37.5	-4.39738	70.8333	-4.39738	37.5	-4.34799	108.333	-4.34799	116.667	-4.53053	100	-4.53053	50	-4.47772
					-3.2837	27.0833	-1.55	1			-0.2	0	0.954545	2.08333	0.954545	0	-1.46429	0	-1.46429	0	-2.95161	4.16667	-2.95161	4.16667	-3.21037	37.5	-3.21037	37.5	-3.76275	54.1667	-3.76275	37.5	-3.80191	52.0833	-3.80191	50	-4.11368	104.167	-4.11368	104.167	-4.09954	70.8333	-4.09954	75	-4.30952	108.333	-4.30952	54.1667	-4.27871
					-3.0847	39.5833	-1.5	1			0	0.05	0.954545	2.08333	0.954545	0	-1.46429	0	-1.46429	0	-2.95161	4.16667	-2.95161	4.16667	-3.21037	37.5	-3.21037	37.5	-3.76275	54.1667	-3.76275	37.5	-3.80191	52.0833	-3.80191	50	-4.11368	104.167	-4.11368	104.167	-4.09954	70.8333	-4.09954	75	-4.30952	108.333	-4.30952	54.1667	-4.27871
					-2.8857	35.4167	-1.45	1			0.2	0.2	0.954545	2.08333	0.954545	0	-1.46429	0	-1.46429	0	-2.95161	4.16667	-2.95161	4.16667	-3.21037	37.5	-3.21037	37.5	-3.76275	54.1667	-3.76275	37.5	-3.80191	52.0833	-3.80191	50	-4.11368	104.167	-4.11368	104.167	-4.09954	70.8333	-4.09954	75	-4.30952	108.333	-4.30952	54.1667	-4.27871
					-2.6867	37.5	-1.4	1			0.4	0.05	2.86364	2.08333	2.86364	4.16667	-0.488095	4.16667	-0.488095	0	-2.2957	37.5	-2.2957	12.5	-2.71646	12.5	-2.71646	0	-3.36667	50	-3.36667	41.6667	-3.47131	56.25	-3.47131	50	-3.82998	54.1667	-3.82998	58.3333	-3.85108	79.1667	-3.85108	62.5	-4.08852	104.167	-4.08852	66.6667	-4.0797
					-2.4876	43.75	-1.35	1			0.6	0.15	2.86364	2.08333	2.86364	4.16667	-0.488095	4.16667	-0.488095	0	-2.2957	37.5	-2.2957	12.5	-2.71646	12.5	-2.71646	0	-3.36667	50	-3.36667	41.6667	-3.47131	56.25	-3.47131	50	-3.82998	54.1667	-3.82998	58.3333	-3.85108	79.1667	-3.85108	62.5	-4.08852	104.167	-4.08852	66.6667	-4.0797
					-2.2886	31.25	-1.3	1			0.8	0.35	2.86364	2.08333	2.86364	4.16667	-0.488095	4.16667	-0.488095	0	-2.2957	37.5	-2.2957	12.5	-2.71646	12.5	-2.71646	0	-3.36667	50	-3.36667	41.6667	-3.47131	56.25	-3.47131	50	-3.82998	54.1667	-3.82998	58.3333	-3.85108	79.1667	-3.85108	62.5	-4.08852	104.167	-4.08852	66.6667	-4.0797
					-2.0896	43.75	-1.25	1					4.77273	0	4.77273	0	0.488095	0	0.488095	0	-1.63978	0	-1.63978	4.16667	-2.22256	29.1667	-2.22256	12.5	-2.97059	45.8333	-2.97059	33.3333	-3.14071	58.3333	-3.14071	66.6667	-3.54628	50	-3.54628	41.6667	-3.60262	95.8333	-3.60262	83.3333	-3.86752	41.6667	-3.86752	29.1667	-3.88069
					-1.8906	47.9167	-1.2	1					4.77273	0	4.77273	0	0.488095	0	0.488095	0	-1.63978	0	-1.63978	4.16667	-2.22256	29.1667	-2.22256	12.5	-2.97059	45.8333	-2.97059	33.3333	-3.14071	58.3333	-3.14071	66.6667	-3.54628	50	-3.54628	41.6667	-3.60262	95.8333	-3.60262	83.3333	-3.86752	41.6667	-3.86752	29.1667	-3.88069
					-1.6916	43.75	-1.15	1					6.68182	0	6.68182	0	0.488095	0	0.488095	0	-1.63978	0	-1.63978	4.16667	-2.22256	29.1667	-2.22256	12.5	-2.97059	45.8333	-2.97059	33.3333	-3.14071	58.3333	-3.14071	66.6667	-3.54628	50	-3.54628	41.6667	-3.60262	95.8333	-3.60262	83.3333	-3.86752	41.6667	-3.86752	29.1667	-3.88069
					-1.4926	50	-1.1	1									1.46429	0	1.46429	0	-0.983871	0	-0.983871	8.33333	-1.72866	25	-1.72866	16.6667	-2.57451	45.8333	-2.57451	33.3333	-2.81011	66.6667	-2.81011	41.6667	-3.26258	83.3333	-3.26258	83.3333	-3.35417	50	-3.35417	50	-3.64652	104.167	-3.64652	50	-3.68168
					-1.2936	39.5833	-1.05	1									1.46429	0	1.46429	0	-0.983871	0	-0.983871	8.33333	-1.72866	25	-1.72866	16.6667	-2.57451	45.8333	-2.57451	33.3333	-2.81011	66.6667	-2.81011	41.6667	-3.26258	83.3333	-3.26258	83.3333	-3.35417	50	-3.35417	50	-3.64652	104.167	-3.64652	50	-3.68168
					-1.0946	56.25	-1	1									1.46429	0	1.46429	0	-0.983871	0	-0.983871	8.33333	-1.72866	25	-1.72866	16.6667	-2.57451	45.8333	-2.57451	33.3333	-2.81011	66.6667	-2.81011	41.6667	-3.26258	83.3333	-3.26258	83.3333	-3.35417	50	-3.35417	50	-3.64652	104.167	-3.64652	50	-3.68168
					-0.8956	52.0833	-0.95	1									2.44048	4.16667	2.44048	0	-0.327957	0	-0.327957	0	-1.23476	8.33333	-1.23476	0	-2.17843	25	-2.17843	20.8333	-2.47951	29.1667	-2.47951	16.6667	-2.97887	41.6667	-2.97887	29.1667	-3.10571	70.8333	-3.10571	75	-3.42552	87.5	-3.42552	58.3333	-3.48267
					-0.6965	56.25	-0.9	1									2.44048	4.16667	2.44048	0	-0.327957	0	-0.327957	0	-1.23476	8.33333	-1.23476	0	-2.17843	25	-2.17843	20.8333	-2.47951	29.1667	-2.47951	16.6667	-2.97887	41.6667	-2.97887	29.1667	-3.10571	70.8333	-3.10571	75	-3.42552	87.5	-3.42552	58.3333	-3.48267
					-0.4975	47.9167	-0.85	1									2.44048	4.16667	2.44048	0	-0.327957	0	-0.327957	0	-1.23476	8.33333	-1.23476	0	-2.17843	25	-2.17843	20.8333	-2.47951	29.1667	-2.47951	16.6667	-2.97887	41.6667	-2.97887	29.1667	-3.10571	70.8333	-3.10571	75	-3.42552	87.5	-3.42552	58.3333	-3.48267
					-0.2985	56.25	-0.8	1									3.41667	12.5	3.41667	0	0.327957	4.16667	0.327957	8.33333	-0.740854	0	-0.740854	4.16667	-1.78235	16.6667	-1.78235	12.5	-2.14891	18.75	-2.14891	8.33333	-2.69517	75	-2.69517	62.5	-2.85725	37.5	-2.85725	45.8333	-3.20452	75	-3.20452	37.5	-3.28366
					-0.0995	56.25	-0.75	1									3.41667	12.5	3.41667	0	0.327957	4.16667	0.327957	8.33333	-0.740854	0	-0.740854	4.16667	-1.78235	16.6667	-1.78235	12.5	-2.14891	18.75	-2.14891	8.33333	-2.69517	75	-2.69517	62.5	-2.85725	37.5	-2.85725	45.8333	-3.20452	75	-3.20452	37.5	-3.28366
					0.0995	50	-0.7	1									3.41667	12.5	3.41667	0	0.327957	4.16667	0.327957	8.33333	-0.740854	0	-0.740854	4.16667	-1.78235	16.6667	-1.78235	12.5	-2.14891	18.75	-2.14891	8.33333	-2.69517	75	-2.69517	62.5	-2.85725	37.5	-2.85725	45.8333	-3.20452	75	-3.20452	37.5	-3.28366
					0.2985	39.5833	-0.65	1									4.39286	0	4.39286	0	0.983871	0	0.983871	0	-0.246951	0	-0.246951	0	-1.38627	8.33333	-1.38627	16.6667	-1.81831	14.5833	-1.81831	8.33333	-2.41147	37.5	-2.41147	12.5	-2.6088	50	-2.6088	45.8333	-2.98352	79.1667	-2.98352	45.8333	-3.08465
					0.4975	39.5833	-0.6	1									4.39286	0	4.39286	0	0.983871	0	0.983871	0	-0.246951	0	-0.246951	0	-1.38627	8.33333	-1.38627	16.6667	-1.81831	14.5833	-1.81831	8.33333	-2.41147	37.5	-2.41147	12.5	-2.6088	50	-2.6088	45.8333	-2.98352	79.1667	-2.98352	45.8333	-3.08465
					0.6965	20.8333	-0.55	0.6									5.36905	12.5	5.36905	12.5	0.983871	0	0.983871	0	-0.246951	0	-0.246951	0	-1.38627	8.33333	-1.38627	16.6667	-1.81831	14.5833	-1.81831	8.33333	-2.41147	37.5	-2.41147	12.5	-2.6088	50	-2.6088	45.8333	-2.98352	79.1667	-2.98352	45.8333	-3.08465
					0.8956	10.4167	-0.5	1													1.63978	0	1.63978	4.16667	0.246951	4.16667	0.246951	4.16667	-0.990196	4.16667	-0.990196	0	-1.4877	12.5	-1.4877	12.5	-2.12777	20.8333	-2.12777	16.6667	-2.36034	45.8333	-2.36034	54.1667	-2.76252	37.5	-2.76252	20.8333	-2.88564
					1.0946	0	-0.45	0.2													1.63978	0	1.63978	4.16667	0.246951	4.16667	0.246951	4.16667	-0.990196	4.16667	-0.990196	0	-1.4877	12.5	-1.4877	12.5	-2.12777	20.8333	-2.12777	16.6667	-2.36034	45.8333	-2.36034	54.1667	-2.76252	37.5	-2.76252	20.8333	-2.88564
					1.2936	6.25	-0.4	0													1.63978	0	1.63978	4.16667	0.246951	4.16667	0.246951	4.16667	-0.990196	4.16667	-0.990196	0	-1.4877	12.5	-1.4877	12.5	-2.12777	20.8333	-2.12777	16.6667	-2.36034	45.8333	-2.36034	54.1667	-2.76252	37.5	-2.76252	20.8333	-2.88564
					1.4926	2.0833	-0.35	0													2.2957	8.33333	2.2957	16.6667	0.740854	0	0.740854	4.16667	-0.594118	4.16667	-0.594118	8.33333	-1.1571	2.08333	-1.1571	8.33333	-1.84406	25	-1.84406	16.6667	-2.11188	20.8333	-2.11188	20.8333	-2.54151	62.5	-2.54151	33.3333	-2.68663
					1.6916	2.0833	-0.3	0													2.2957	8.33333	2.2957	16.6667	0.740854	0	0.740854	4.16667	-0.594118	4.16667	-0.594118	8.33333	-1.1571	2.08333	-1.1571	8.33333	-1.84406	25	-1.84406	16.6667	-2.11188	20.8333	-2.11188	20.8333	-2.54151	62.5	-2.54151	33.3333	-2.68663
					1.8906	16.6667	-0.25	0													2.2957	8.33333	2.2957	16.6667	0.740854	0	0.740854	4.16667	-0.594118	4.16667	-0.594118	8.33333	-1.1571	2.08333	-1.1571	8.33333	-1.84406	25	-1.84406	16.6667	-2.11188	20.8333	-2.11188	20.8333	-2.54151	62.5	-2.54151	33.3333	-2.68663
					2.0896	12.5	-0.2	0													2.95161	12.5	2.95161	4.16667	1.23476	0	1.23476	0	-0.198039	4.16667	-0.198039	4.16667	-0.826503	2.08333	-0.826503	4.16667	-1.56036	12.5	-1.56036	12.5	-1.86343	25	-1.86343	29.1667	-2.32051	70.8333	-2.32051	29.1667	-2.48762
					2.2886	25	-0.15	0													2.95161	12.5	2.95161	4.16667	1.23476	0	1.23476	0	-0.198039	4.16667	-0.198039	4.16667	-0.826503	2.08333	-0.826503	4.16667	-1.56036	12.5	-1.56036	12.5	-1.86343	25	-1.86343	29.1667	-2.32051	70.8333	-2.32051	29.1667	-2.48762
					2.4876	27.0833	-0.1	0													2.95161	12.5	2.95161	4.16667	1.23476	0	1.23476	0	-0.198039	4.16667	-0.198039	4.16667	-0.826503	2.08333	-0.826503	4.16667	-1.56036	12.5	-1.56036	12.5	-1.86343	25	-1.86343	29.1667	-2.32051	70.8333	-2.32051	29.1667	-2.48762
					2.6867	54.1667	-0.05	0													3.60753	16.6667	3.60753	16.6667	1.72866	0	1.72866	0	0.198039	0	0.198039	8.33333	-0.495902	0	-0.495902	12.5	-1.27666	12.5	-1.27666	20.8333	-1.61497	16.6667	-1.61497	16.6667	-2.09951	37.5	-2.09951	58.3333	-2.28861
					2.8857	58.3333	0	0													3.60753	16.6667	3.60753	16.6667	1.72866	0	1.72866	0	0.198039	0	0.198039	8.33333	-0.495902	0	-0.495902	12.5	-1.27666	12.5	-1.27666	20.8333	-1.61497	16.6667	-1.61497	16.6667	-2.09951	37.5	-2.09951	58.3333	-2.28861
					3.0847	56.25	0.05	0													3.60753	16.6667	3.60753	16.6667	1.72866	0	1.72866	0	0.198039	0	0.198039	8.33333	-0.495902	0	-0.495902	12.5	-1.27666	12.5	-1.27666	20.8333	-1.61497	16.6667	-1.61497	16.6667	-2.09951	37.5	-2.09951	58.3333	-2.28861
					3.2837	62.5	0.1	0													4.26344	0	4.26344	8.33333	2.22256	8.33333	2.22256	0	0.594118	4.16667	0.594118	4.16667	-0.165301	0	-0.165301	0	-0.992958	0	-0.992958	4.16667	-1.36651	0	-1.36651	4.16667	-1.87851	37.5	-1.87851	16.6667	-2.0896
					3.4827	62.5	0.15	0													4.26344	0	4.26344	8.33333	2.22256	8.33333	2.22256	0	0.594118	4.16667	0.594118	4.16667	-0.165301	0	-0.165301	0	-0.992958	0	-0.992958	4.16667	-1.36651	0	-1.36651	4.16667	-1.87851	37.5	-1.87851	16.6667	-2.0896
					3.6817	64.5833	0.2	0													4.26344	0	4.26344	8.33333	2.22256	8.33333	2.22256	0	0.594118	4.16667	0.594118	4.16667	-0.165301	0	-0.165301	0	-0.992958	0	-0.992958	4.16667	-1.36651	0	-1.36651	4.16667	-1.87851	37.5	-1.87851	16.6667	-2.0896
					3.8807	77.0833	0.25	0													4.91935	20.8333	4.91935	12.5	2.71646	20.8333	2.71646	12.5	0.990196	0	0.990196	8.33333	0.165301	0	0.165301	8.33333	-0.709256	4.16667	-0.709256	0	-1.11806	8.33333	-1.11806	0	-1.65751	16.6667	-1.65751	8.33333	-1.89059
					4.0797	70.8333	0.3	0													4.91935	20.8333	4.91935	12.5	2.71646	20.8333	2.71646	12.5	0.990196	0	0.990196	8.33333	0.165301	0	0.165301	8.33333	-0.709256	4.16667	-0.709256	0	-1.11806	8.33333	-1.11806	0	-1.65751	16.6667	-1.65751	8.33333	-1.89059
					4.2788	54.1667	0.35	0													5.57527	37.5	5.57527	29.1667	2.71646	20.8333	2.71646	12.5	0.990196	0	0.990196	8.33333	0.165301	0	0.165301	8.33333	-0.709256	4.16667	-0.709256	0	-1.11806	8.33333	-1.11806	0	-1.65751	16.6667	-1.65751	8.33333	-1.89059
					4.4778	68.75	0.4	0																	3.21037	4.16667	3.21037	25	1.38627	4.16667	1.38627	4.16667	0.495902	2.08333	0.495902	12.5	-0.425553	0	-0.425553	4.16667	-0.869599	0	-0.869599	4.16667	-1.43651	8.33333	-1.43651	0	-1.69158
					4.6768	60.4167	0.45	0																	3.21037	4.16667	3.21037	25	1.38627	4.16667	1.38627	4.16667	0.495902	2.08333	0.495902	12.5	-0.425553	0	-0.425553	4.16667	-0.869599	0	-0.869599	4.16667	-1.43651	8.33333	-1.43651	0	-1.69158
					4.8758	54.1667	0.5	0																	3.21037	4.16667	3.21037	25	1.38627	4.16667	1.38627	4.16667	0.495902	2.08333	0.495902	12.5	-0.425553	0	-0.425553	4.16667	-0.869599	0	-0.869599	4.16667	-1.43651	8.33333	-1.43651	0	-1.69158
					5.0748	60.4167	0.55	0																	3.70427	8.33333	3.70427	8.33333	1.78235	16.6667	1.78235	16.6667	0.826503	10.4167	0.826503	16.6667	-0.141851	0	-0.141851	0	-0.621142	0	-0.621142	8.33333	-1.21551	20.8333	-1.21551	12.5	-1.49257
							0.6	0																	3.70427	8.33333	3.70427	8.33333	1.78235	16.6667	1.78235	16.6667	0.826503	10.4167	0.826503	16.6667	-0.141851	0	-0.141851	0	-0.621142	0	-0.621142	8.33333	-1.21551	20.8333	-1.21551	12.5	-1.49257
							0.65	0.2																	3.70427	8.33333	3.70427	8.33333	1.78235	16.6667	1.78235	16.6667	0.826503	10.4167	0.826503	16.6667	-0.141851	0	-0.141851	0	-0.621142	0	-0.621142	8.33333	-1.21551	20.8333	-1.21551	12.5	-1.49257
							0.7	0																	4.19817	29.1667	4.19817	16.6667	2.17843	4.16667	2.17843	16.6667	1.1571	6.25	1.1571	12.5	0.141851	0	0.141851	4.16667	-0.372685	4.16667	-0.372685	4.16667	-0.994505	4.16667	-0.994505	0	-1.29356
							0.75	0.2																	4.19817	29.1667	4.19817	16.6667	2.17843	4.16667	2.17843	16.6667	1.1571	6.25	1.1571	12.5	0.141851	0	0.141851	4.16667	-0.372685	4.16667	-0.372685	4.16667	-0.994505	4.16667	-0.994505	0	-1.29356
							0.8	0.4																	4.19817	29.1667	4.19817	16.6667	2.17843	4.16667	2.17843	16.6667	1.1571	6.25	1.1571	12.5	0.141851	0	0.141851	4.16667	-0.372685	4.16667	-0.372685	4.16667	-0.994505	4.16667	-0.994505	0	-1.29356
							0.85	0.8																	4.69207	29.1667	4.69207	20.8333	2.57451	25	2.57451	33.3333	1.4877	4.16667	1.4877	8.33333	0.425553	4.16667	0.425553	8.33333	-0.124228	4.16667	-0.124228	4.16667	-0.773504	8.33333	-0.773504	0	-1.09455
							0.9	1																	4.69207	29.1667	4.69207	20.8333	2.57451	25	2.57451	33.3333	1.4877	4.16667	1.4877	8.33333	0.425553	4.16667	0.425553	8.33333	-0.124228	4.16667	-0.124228	4.16667	-0.773504	8.33333	-0.773504	0	-1.09455
							0.95	1																	5.18598	45.8333	5.18598	41.6667	2.57451	25	2.57451	33.3333	1.4877	4.16667	1.4877	8.33333	0.425553	4.16667	0.425553	8.33333	-0.124228	4.16667	-0.124228	4.16667	-0.773504	8.33333	-0.773504	0	-1.09455
							1	1																					2.97059	20.8333	2.97059	25	1.81831	10.4167	1.81831	4.16667	0.709256	12.5	0.709256	12.5	0.124228	8.33333	0.124228	0	-0.552503	0	-0.552503	4.16667	-0.895545
							1.05	1																					2.97059	20.8333	2.97059	25	1.81831	10.4167	1.81831	4.16667	0.709256	12.5	0.709256	12.5	0.124228	8.33333	0.124228	0	-0.552503	0	-0.552503	4.16667	-0.895545
							1.1	1																					2.97059	20.8333	2.97059	25	1.81831	10.4167	1.81831	4.16667	0.709256	12.5	0.709256	12.5	0.124228	8.33333	0.124228	0	-0.552503	0	-0.552503	4.16667	-0.895545
							1.15	0.8																					3.36667	20.8333	3.36667	16.6667	2.14891	12.5	2.14891	12.5	0.992958	25	0.992958	8.33333	0.372685	4.16667	0.372685	0	-0.331502	4.16667	-0.331502	8.33333	-0.696535
							1.2	0.6																					3.36667	20.8333	3.36667	16.6667	2.14891	12.5	2.14891	12.5	0.992958	25	0.992958	8.33333	0.372685	4.16667	0.372685	0	-0.331502	4.16667	-0.331502	8.33333	-0.696535
							1.25	1																					3.36667	20.8333	3.36667	16.6667	2.14891	12.5	2.14891	12.5	0.992958	25	0.992958	8.33333	0.372685	4.16667	0.372685	0	-0.331502	4.16667	-0.331502	8.33333	-0.696535
							1.3	0.8																					3.76275	33.3333	3.76275	16.6667	2.47951	25	2.47951	33.3333	1.27666	16.6667	1.27666	12.5	0.621142	29.1667	0.621142	0	-0.110501	4.16667	-0.110501	8.33333	-0.497525
							1.35	1																					3.76275	33.3333	3.76275	16.6667	2.47951	25	2.47951	33.3333	1.27666	16.6667	1.27666	12.5	0.621142	29.1667	0.621142	0	-0.110501	4.16667	-0.110501	8.33333	-0.497525
							1.4	1																					3.76275	33.3333	3.76275	16.6667	2.47951	25	2.47951	33.3333	1.27666	16.6667	1.27666	12.5	0.621142	29.1667	0.621142	0	-0.110501	4.16667	-0.110501	8.33333	-0.497525
							1.45	1																					4.15882	41.6667	4.15882	25	2.81011	27.0833	2.81011	37.5	1.56036	4.16667	1.56036	4.16667	0.869599	8.33333	0.869599	4.16667	0.110501	0	0.110501	0	-0.298515
							1.5	1																					4.15882	41.6667	4.15882	25	2.81011	27.0833	2.81011	37.5	1.56036	4.16667	1.56036	4.16667	0.869599	8.33333	0.869599	4.16667	0.110501	0	0.110501	0	-0.298515
							1.55	1																					4.15882	41.6667	4.15882	25	2.81011	27.0833	2.81011	37.5	1.56036	4.16667	1.56036	4.16667	0.869599	8.33333	0.869599	4.16667	0.110501	0	0.110501	0	-0.298515
							1.6	1																					4.5549	37.5	4.5549	37.5	3.14071	37.5	3.14071	25	1.84406	45.8333	1.84406	37.5	1.11806	25	1.11806	12.5	0.331502	8.33333	0.331502	0	-0.099505
							1.65	1																					4.5549	37.5	4.5549	37.5	3.14071	37.5	3.14071	25	1.84406	45.8333	1.84406	37.5	1.11806	25	1.11806	12.5	0.331502	8.33333	0.331502	0	-0.099505
							1.7	1																					4.5549	37.5	4.5549	37.5	3.14071	37.5	3.14071	25	1.84406	45.8333	1.84406	37.5	1.11806	25	1.11806	12.5	0.331502	8.33333	0.331502	0	-0.099505
							1.75	0.6																					4.95098	45.8333	4.95098	41.6667	3.47131	27.0833	3.47131	41.6667	2.12777	25	2.12777	12.5	1.36651	8.33333	1.36651	20.8333	0.552503	0	0.552503	4.16667	0.099505
							1.8	0.4																					4.95098	45.8333	4.95098	41.6667	3.47131	27.0833	3.47131	41.6667	2.12777	25	2.12777	12.5	1.36651	8.33333	1.36651	20.8333	0.552503	0	0.552503	4.16667	0.099505
							1.85	1																					5.34706	54.1667	5.34706	54.1667	3.47131	27.0833	3.47131	41.6667	2.12777	25	2.12777	12.5	1.36651	8.33333	1.36651	20.8333	0.552503	0	0.552503	4.16667	0.099505
							1.9	0.8																									3.80191	45.8333	3.80191	66.6667	2.41147	37.5	2.41147	50	1.61497	12.5	1.61497	8.33333	0.773504	16.6667	0.773504	25	0.298515
							1.95	0.6																									3.80191	45.8333	3.80191	66.6667	2.41147	37.5	2.41147	50	1.61497	12.5	1.61497	8.33333	0.773504	16.6667	0.773504	25	0.298515
							2	0.8																									3.80191	45.8333	3.80191	66.6667	2.41147	37.5	2.41147	50	1.61497	12.5	1.61497	8.33333	0.773504	16.6667	0.773504	25	0.298515
																																	4.13251	83.3333	4.13251	79.1667	2.69517	37.5	2.69517	29.1667	1.86343	37.5	1.86343	29.1667	0.994505	12.5	0.994505	12.5	0.497525
																																	4.13251	83.3333	4.13251	79.1667	2.69517	37.5	2.69517	29.1667	1.86343	37.5	1.86343	29.1667	0.994505	12.5	0.994505	12.5	0.497525
																																	4.13251	83.3333	4.13251	79.1667	2.69517	37.5	2.69517	29.1667	1.86343	37.5	1.86343	29.1667	0.994505	12.5	0.994505	12.5	0.497525
																																	4.46311	60.4167	4.46311	58.3333	2.97887	37.5	2.97887	20.8333	2.11188	16.6667	2.11188	20.8333	1.21551	20.8333	1.21551	0	0.696535
																																	4.46311	60.4167	4.46311	58.3333	2.97887	37.5	2.97887	20.8333	2.11188	16.6667	2.11188	20.8333	1.21551	20.8333	1.21551	0	0.696535
																																	4.46311	60.4167	4.46311	58.3333	2.97887	37.5	2.97887	20.8333	2.11188	16.6667	2.11188	20.8333	1.21551	20.8333	1.21551	0	0.696535
																																	4.79372	62.5	4.79372	33.3333	3.26258	104.167	3.26258	83.3333	2.36034	70.8333	2.36034	62.5	1.43651	12.5	1.43651	4.16667	0.895545
																																	4.79372	62.5	4.79372	33.3333	3.26258	104.167	3.26258	83.3333	2.36034	70.8333	2.36034	62.5	1.43651	12.5	1.43651	4.16667	0.895545
																																	5.12432	62.5	5.12432	54.1667	3.26258	104.167	3.26258	83.3333	2.36034	70.8333	2.36034	62.5	1.43651	12.5	1.43651	4.16667	0.895545
																																					3.54628	45.8333	3.54628	41.6667	2.6088	45.8333	2.6088	29.1667	1.65751	16.6667	1.65751	0	1.09455
																																					3.54628	45.8333	3.54628	41.6667	2.6088	45.8333	2.6088	29.1667	1.65751	16.6667	1.65751	0	1.09455
																																					3.54628	45.8333	3.54628	41.6667	2.6088	45.8333	2.6088	29.1667	1.65751	16.6667	1.65751	0	1.09455
																																					3.82998	79.1667	3.82998	83.3333	2.85725	54.1667	2.85725	45.8333	1.87851	33.3333	1.87851	25	1.29356
																																					3.82998	79.1667	3.82998	83.3333	2.85725	54.1667	2.85725	45.8333	1.87851	33.3333	1.87851	25	1.29356
																																					3.82998	79.1667	3.82998	83.3333	2.85725	54.1667	2.85725	45.8333	1.87851	33.3333	1.87851	25	1.29356
																																					4.11368	83.3333	4.11368	70.8333	3.10571	91.6667	3.10571	66.6667	2.09951	41.6667	2.09951	20.8333	1.49257
																																					4.11368	83.3333	4.11368	70.8333	3.10571	91.6667	3.10571	66.6667	2.09951	41.6667	2.09951	20.8333	1.49257
																																					4.11368	83.3333	4.11368	70.8333	3.10571	91.6667	3.10571	66.6667	2.09951	41.6667	2.09951	20.8333	1.49257
																																					4.39738	45.8333	4.39738	54.1667	3.35417	45.8333	3.35417	37.5	2.32051	62.5	2.32051	29.1667	1.69158
																																					4.39738	45.8333	4.39738	54.1667	3.35417	45.8333	3.35417	37.5	2.32051	62.5	2.32051	29.1667	1.69158
																																					4.39738	45.8333	4.39738	54.1667	3.35417	45.8333	3.35417	37.5	2.32051	62.5	2.32051	29.1667	1.69158
																																					4.68109	125	4.68109	100	3.60262	100	3.60262	87.5	2.54151	50	2.54151	16.6667	1.89059
																																					4.68109	125	4.68109	100	3.60262	100	3.60262	87.5	2.54151	50	2.54151	16.6667	1.89059
																																					4.68109	125	4.68109	100	3.60262	100	3.60262	87.5	2.54151	50	2.54151	16.6667	1.89059
																																					4.96479	58.3333	4.96479	70.8333	3.85108	87.5	3.85108	87.5	2.76252	91.6667	2.76252	29.1667	2.0896
																																					4.96479	58.3333	4.96479	70.8333	3.85108	87.5	3.85108	87.5	2.76252	91.6667	2.76252	29.1667	2.0896
																																					5.24849	120.833	5.24849	112.5	3.85108	87.5	3.85108	87.5	2.76252	91.6667	2.76252	29.1667	2.0896
																																									4.09954	87.5	4.09954	70.8333	2.98352	100	2.98352	33.3333	2.28861
																																									4.09954	87.5	4.09954	70.8333	2.98352	100	2.98352	33.3333	2.28861
																																									4.09954	87.5	4.09954	70.8333	2.98352	100	2.98352	33.3333	2.28861
																																									4.34799	137.5	4.34799	120.833	3.20452	87.5	3.20452	33.3333	2.48762
																																									4.34799	137.5	4.34799	120.833	3.20452	87.5	3.20452	33.3333	2.48762
																																									4.34799	137.5	4.34799	120.833	3.20452	87.5	3.20452	33.3333	2.48762
																																									4.59645	62.5	4.59645	66.6667	3.42552	95.8333	3.42552	33.3333	2.68663
																																									4.59645	62.5	4.59645	66.6667	3.42552	95.8333	3.42552	33.3333	2.68663
																																									4.59645	62.5	4.59645	66.6667	3.42552	95.8333	3.42552	33.3333	2.68663
																																									4.84491	125	4.84491	141.667	3.64652	62.5	3.64652	33.3333	2.88564
																																									4.84491	125	4.84491	141.667	3.64652	62.5	3.64652	33.3333	2.88564
																																									5.09336	125	5.09336	95.8333	3.64652	62.5	3.64652	33.3333	2.88564
																																													3.86752	100	3.86752	37.5	3.08465
																																													3.86752	100	3.86752	37.5	3.08465
																																													3.86752	100	3.86752	37.5	3.08465
																																													4.08852	116.667	4.08852	37.5	3.28366
																																													4.08852	116.667	4.08852	37.5	3.28366
																																													4.08852	116.667	4.08852	37.5	3.28366
																																													4.30952	112.5	4.30952	54.1667	3.48267
																																													4.30952	112.5	4.30952	54.1667	3.48267
																																													4.30952	112.5	4.30952	54.1667	3.48267
																																													4.53053	116.667	4.53053	58.3333	3.68168
																																													4.53053	116.667	4.53053	58.3333	3.68168
																																													4.53053	116.667	4.53053	58.3333	3.68168
																																													4.75153	112.5	4.75153	20.8333	3.88069
																																													4.75153	112.5	4.75153	20.8333	3.88069
																																													4.75153	112.5	4.75153	20.8333	3.88069
																																													4.97253	87.5	4.97253	37.5	4.0797
																																													4.97253	87.5	4.97253	37.5	4.0797
																																													5.19353	112.5	5.19353	75	4.0797
																																																	4.27871
																																																	4.27871
																																																	4.27871
																																																	4.47772
																																																	4.47772
																																																	4.47772
																																																	4.67673
																																																	4.67673
																																																	4.67673
																																																	4.87574
																																																	4.87574
																																																	5.07475
[truncated: 33 more columns]

## Sheet: panel C
	ITD (ms)	Tone (spikes/s)	ITD (ms)	Tone sustained (spikes/s)	ITD (ms)	Spikes/click
	-0.8319	18	-0.8319	0	-2	0.9091
	-0.7903	12	-0.7903	0	-1.9	0.9091
	-0.7487	16	-0.7487	0	-1.8	0.9091
	-0.7071	4	-0.7071	0	-1.7	0.9091
	-0.6655	8	-0.6655	0	-1.6	0.9091
	-0.6239	2	-0.6239	0	-1.5	0.9091
	-0.5823	0	-0.5823	0	-1.4	0.9091
	-0.5407	4	-0.5407	0	-1.3	0.9091
	-0.4991	0	-0.4991	0	-1.2	0.9091
	-0.4575	0	-0.4575	0	-1.1	0.9091
	-0.4159	0	-0.4159	0	-1	0.9091
	-0.3744	0	-0.3744	0	-0.9	0.9091
	-0.3328	0	-0.3328	0	-0.8	0.9091
	-0.2912	0	-0.2912	0	-0.7	1
	-0.2496	0	-0.2496	0	-0.6	0.9091
	-0.208	0	-0.208	0	-0.5	0.3636
	-0.1664	0	-0.1664	0	-0.4	0.1818
	-0.1248	0	-0.1248	0	-0.3	0
	-0.0832	0	-0.0832	0	-0.2	0
	-0.0416	0	-0.0416	0	-0.1	0
	0	0	0	0	0	0.1818
	0.0416	0	0.0416	0	0.1	0.3636
	0.0832	0	0.0832	0	0.2	0.7273
	0.1248	0	0.1248	0	0.3	0.9091
	0.1664	0	0.1664	0	0.4	0.9091
	0.208	0	0.208	0	0.5	0.9091
	0.2496	0	0.2496	0	0.6	0.9091
	0.2912	0	0.2912	0	0.7	0.9091
	0.3328	0	0.3328	0	0.8	0.9091
	0.3744	0	0.3744	0	0.9	0.9091
	0.4159	0	0.4159	0	1	0.9091
	0.4575	2	0.4575	0	1.1	0.9091
	0.4991	0	0.4991	0	1.2	0.9091
	0.5407	0	0.5407	0	1.3	0.9091
	0.5823	0	0.5823	0	1.4	0.9091
	0.6239	0	0.6239	0	1.5	0.9091
	0.6655	0	0.6655	0	1.6	0.9091
	0.7071	0	0.7071	0	1.7	0.9091
					1.8	0.9091
					1.9	0.9091
					2	0.9091

## Sheet: panel D
	Ipsilateral (top row)												Ipsilateral (top row)
	Click												Tone sustained
	Time re. EPSP peak (ms)	Mean Vmrel (mV)	Vm rel (mV)	Vm rel (mV)	Vm rel (mV)	Vm rel (mV)	Vm rel (mV)	Vm rel (mV)	Vm rel (mV)	Vm rel (mV)	Vm rel (mV)		Time re. EPSP peak (ms)	Mean Vmrel (mV)	Vm rel (mV)	Vm rel (mV)	Vm rel (mV)	Vm rel (mV)	Vm rel (mV)	Vm rel (mV)	Vm rel (mV)	Vm rel (mV)	Vm rel (mV)
	-0.996477	0.342006	1.29833	0.237846	0.839508	-1.38866	0.446037	0.804554	-0.145721	-0.176968	1.16312		-0.996477	0.96608	1.20372	1.21652	0.818634	4.46605	0.7924	0.0371857	1.48393	2.9827	0.461212	1.18089	-0.912354	1.96621	0.00430679	0.518433	0.661148	1.15475	1.00454	0.41647	-0.115273	0.619259	2.19076	1.92856	-0.0335312	-0.744827	-0.511169	0.669186	1.97401	2.04778	1.8053	0.032547	0.385895	0.0273628	1.86837	2.06044	0.804749
	-0.986237	0.337909	1.34394	0.276527	0.786171	-1.36427	0.402428	0.773911	-0.0803452	-0.221218	1.12403		-0.986237	0.977455	1.11804	1.30389	0.954178	4.40149	0.749317	0.103664	1.6237	3.10014	0.404968	1.11587	-1.02401	1.84158	0.0671082	0.452988	0.672104	1.18243	1.06842	0.336044	-0.0180702	0.638557	2.19376	1.95853	-0.0850906	-0.644039	-0.589664	0.673534	1.91288	1.94387	1.67074	0.0881691	0.426666	0.107193	1.83997	2.00163	0.846149
	-0.975997	0.355448	1.40824	0.341286	0.796688	-1.28099	0.441563	0.830067	-0.173496	-0.315987	1.15166		-0.975997	0.979931	1.05733	1.34572	0.972343	4.40328	0.736332	0.124168	1.75333	3.13529	0.286579	1.00645	-1.11987	1.71758	0.242043	0.45182	0.669792	1.23753	1.08044	0.200512	-0.00878143	0.688385	2.13262	2.02924	-0.134048	-0.584316	-0.75415	0.692383	1.89653	1.88591	1.55035	0.00114441	0.501411	0.134491	1.86123	2.02619	0.932598
	-0.965757	0.369601	1.26667	0.419235	0.871159	-1.23458	0.512886	0.838951	-0.162243	-0.267471	1.0818		-0.965757	0.982307	1.07021	1.38345	0.934639	4.3469	0.747005	0.217056	1.74935	3.17359	0.271488	0.863171	-1.20611	1.65725	0.26342	0.470474	0.654354	1.30049	1.04109	0.130192	0.00423431	0.703682	2.23266	2.02537	-0.21051	-0.582253	-0.843628	0.838924	1.87434	1.80351	1.5331	-0.102684	0.493542	0.0505371	1.87553	2.04872	0.985527
	-0.955517	0.40492	1.41629	0.482929	0.849678	-1.22258	0.388908	0.894508	-0.0836029	-0.147842	1.06599		-0.955517	0.984163	1.11267	1.45082	0.948204	4.27997	0.721684	0.156807	1.67379	3.14889	0.249519	0.758484	-1.14716	1.64185	0.272934	0.51067	0.520851	1.45845	0.984837	0.168419	-0.0320435	0.60915	2.28754	2.15638	-0.310192	-0.501274	-0.802135	0.838867	1.83487	1.83002	1.52422	-0.185654	0.472736	0.0230484	1.91803	2.0586	1.21548
	-0.945277	0.439993	1.86448	0.475288	0.701622	-1.23452	0.306282	0.986206	-0.0532608	-0.145695	1.05953		-0.945277	0.996165	1.08244	1.42503	1.02198	4.27413	0.727432	0.127342	1.72043	3.15534	0.194229	0.746918	-0.967438	1.56841	0.405884	0.477028	0.426857	1.57635	1.0076	0.272083	-0.0247459	0.573399	2.30042	2.18401	-0.320148	-0.471664	-0.901016	0.736706	1.89621	1.75588	1.55062	-0.25489	0.401951	-0.0372963	1.99813	2.07664	1.30525
	-0.935037	0.434147	1.98432	0.447498	0.663639	-1.19543	0.30843	0.980125	-0.0953331	-0.27058	1.08465		-0.935037	1.00859	1.04633	1.41951	1.16484	4.24999	0.831261	0.138035	1.70599	3.23653	0.14241	0.636688	-0.884438	1.52426	0.540131	0.517143	0.419449	1.66624	0.971764	0.342529	-0.0586967	0.547615	2.38824	2.14502	-0.237343	-0.261448	-0.944481	0.677792	1.79062	1.65259	1.42356	-0.286865	0.410416	-0.0786781	2.01109	2.12653	1.44185
	-0.924797	0.415335	1.92458	0.534283	0.676968	-1.13523	0.304031	0.894836	-0.195515	-0.329079	1.06314		-0.924797	1.00622	1.04759	1.41338	1.25828	4.12167	0.862782	0.127342	1.69609	3.32325	0.138966	0.395527	-1.00613	1.54151	0.619984	0.564568	0.423744	1.77331	1.01266	0.33931	-0.125225	0.558949	2.49366	2.18138	-0.249123	-0.0912514	-1.00441	0.671356	1.60951	1.67744	1.40371	-0.242218	0.409286	-0.128578	2.06556	2.15838	1.50785
	-0.914557	0.395928	1.80989	0.580894	0.546745	-1.13844	0.321388	0.849545	-0.25742	-0.178349	1.02909		-0.914557	1.02166	1.05511	1.50093	1.30303	4.00583	0.794044	0.0950356	1.68018	3.38906	0.104156	0.281994	-1.0006	1.5538	0.714508	0.62764	0.352383	1.77778	1.08308	0.234978	-0.117977	0.633923	2.53916	2.26056	-0.296291	0.0137711	-1.1097	0.720287	1.45927	1.67229	1.40859	-0.163563	0.419357	-0.113556	2.13449	2.10948	1.57111
	-0.904317	0.353529	1.73712	0.590908	0.500397	-1.2572	0.349651	0.949123	-0.344574	-0.203144	0.859486		-0.904317	1.03698	1.04243	1.59361	1.3632	3.90793	0.798767	0.131264	1.6707	3.47203	0.107574	0.157444	-0.926685	1.55082	0.817348	0.625771	0.325645	1.85777	1.14358	0.190067	-0.116062	0.565601	2.50391	2.31342	-0.337467	0.0542412	-1.22187	0.720764	1.42408	1.59829	1.33394	-0.165127	0.340858	-0.23893	2.15713	2.12981	1.65811
	-0.894077	0.317607	1.70081	0.531326	0.478043	-1.36118	0.34758	0.998055	-0.332535	-0.282227	0.778591		-0.894077	1.04454	1.05011	1.61233	1.41822	3.96198	0.770775	0.266075	1.75359	3.44595	0.0810623	0.0374565	-1.03529	1.44662	0.924934	0.575676	0.264145	1.87244	1.25375	0.33709	-0.094532	0.627987	2.61001	2.37676	-0.500629	0.12677	-1.36665	0.736	1.35898	1.54583	1.23079	-0.170929	0.308529	-0.28672	2.12946	2.03012	1.69361
	-0.883837	0.314443	1.66338	0.483738	0.497734	-1.31344	0.382187	0.987698	-0.278439	-0.360748	0.767876		-0.883837	1.06491	1.05623	1.68789	1.54572	3.89427	0.88892	0.324669	1.76069	3.39279	-0.0406265	-0.0447273	-1.03474	1.41523	1.04887	0.627472	0.281334	1.93668	1.2737	0.398659	-0.182091	0.61655	2.73616	2.48457	-0.520992	0.239136	-1.3358	0.786377	1.31829	1.51054	1.21086	-0.0604935	0.241653	-0.257061	2.13264	1.97785	1.79843
	-0.873597	0.323118	1.62393	0.509155	0.458611	-1.29092	0.451496	0.975418	-0.302063	-0.377621	0.860058		-0.873597	1.07997	1.21958	1.74778	1.62342	3.77891	0.909546	0.331451	1.72109	3.36566	-0.154552	-0.101948	-1.08193	1.2214	1.1428	0.733185	0.409714	1.92746	1.3436	0.464432	-0.152977	0.692406	2.85981	2.53347	-0.472553	0.385944	-1.36519	0.867584	1.15289	1.55849	1.13754	-0.0852089	0.317543	-0.169895	2.16291	1.98793	1.89438
	-0.863357	0.33844	1.66104	0.451637	0.395874	-1.29828	0.546101	0.84642	-0.21566	-0.322117	0.980949		-0.863357	1.09202	1.2809	1.73254	1.76076	3.66232	1.00016	0.417629	1.71721	3.37298	-0.158604	-0.11544	-1.07932	1.09488	1.16064	0.686314	0.397484	1.97386	1.31563	0.513199	-0.0800209	0.728607	2.84502	2.51839	-0.477551	0.557415	-1.31915	0.854805	0.977318	1.58953	1.03678	-0.0602493	0.358105	-0.0897408	2.16541	1.86062	2.0359
	-0.853117	0.352264	1.58829	0.537262	0.334599	-1.31992	0.615669	0.785362	-0.0783653	-0.297035	1.00452		-0.853117	1.10736	1.25412	1.83102	1.82825	3.6325	0.995987	0.480438	1.70078	3.35725	-0.245735	-0.136063	-0.994358	1.03616	1.21613	0.643913	0.379555	1.96709	1.29801	0.59449	-0.0944824	0.71814	2.91646	2.58951	-0.42815	0.666405	-1.30704	0.907509	0.828911	1.57365	0.984589	-0.140358	0.428009	0.0178986	2.17609	1.81007	2.2473
	-0.842877	0.325559	1.47133	0.590042	0.244175	-1.29816	0.652706	0.659752	-0.135433	-0.317039	1.06267		-0.842877	1.12139	1.12769	1.88417	1.93488	3.44965	0.967827	0.412582	1.62415	3.30837	-0.342808	-0.275883	-0.965652	0.968449	1.28433	0.607651	0.381565	2.08696	1.29296	0.600578	-0.0589142	0.662365	3.00945	2.63583	-0.376389	0.680294	-1.30986	0.905991	0.806213	1.66094	0.96965	-0.14341	0.507584	0.071804	2.21901	1.82084	2.26962
	-0.832637	0.305066	1.38531	0.595928	0.137245	-1.29086	0.636635	0.700508	-0.0911369	-0.306831	0.978802		-0.832637	1.12134	1.02247	1.83741	2.12452	3.27721	0.933281	0.343872	1.56962	3.21093	-0.385628	-0.275551	-0.977135	1.01074	1.40525	0.574089	0.416626	2.16624	1.26889	0.671547	-0.0206795	0.587822	3.04952	2.76445	-0.275158	0.694588	-1.42119	0.951065	0.856995	1.56863	0.958054	-0.081665	0.53207	-0.00445557	2.15224	1.75739	2.30115
	-0.822397	0.302664	1.42746	0.614407	0.0494499	-1.28907	0.588619	0.781967	-0.131607	-0.244686	0.927437		-0.822397	1.12352	1.03519	1.87819	2.28974	3.21167	1.00006	0.255657	1.45776	3.063	-0.471519	-0.347397	-1.0149	1.04681	1.34744	0.586128	0.529495	2.10973	1.29674	0.696243	0.053669	0.537731	3.16431	2.82488	-0.320911	0.69635	-1.55547	0.915504	0.812714	1.53021	1.02995	-0.0135651	0.592995	-0.025486	2.10245	1.76604	2.23367
	-0.812157	0.304939	1.39865	0.69783	0.00701904	-1.38028	0.707222	0.785355	-0.122059	-0.185501	0.836216		-0.812157	1.13508	1.04529	1.94727	2.28393	3.04251	1.10683	0.294415	1.3417	2.90998	-0.486969	-0.327904	-0.929619	1.10859	1.34179	0.549484	0.532402	2.03828	1.33783	0.623482	0.113464	0.541367	3.18937	2.79655	-0.358257	0.784721	-1.58639	0.907341	0.730419	1.46253	1.11787	0.114029	0.616982	0.0777969	2.14211	1.69568	2.1595
	-0.801917	0.339052	1.34994	0.684128	0.055912	-1.25777	0.761322	0.848747	-0.0147324	-0.177731	0.801647		-0.801917	1.13611	1.10218	1.96245	2.24172	2.81652	1.19762	0.360752	1.2943	2.78954	-0.452908	-0.34066	-0.898148	1.24847	1.31574	0.523392	0.518299	1.98819	1.49171	0.572937	0.102558	0.507309	3.25151	2.74248	-0.402832	0.882782	-1.55123	0.860596	0.62318	1.47169	1.07632	0.158207	0.554016	0.213947	2.18418	1.67147	2.10411
	-0.791677	0.353744	1.2741	0.719334	0.106655	-1.20696	0.714432	0.79451	0.0896721	-0.113579	0.805534		-0.791677	1.14317	1.07162	1.93632	2.37794	2.76193	1.25077	0.43087	1.15171	2.66552	-0.47543	-0.380192	-0.877651	1.30687	1.25661	0.5541	0.517776	1.98802	1.52688	0.525238	0.10648	0.507988	3.38004	2.7906	-0.470112	1.01709	-1.52837	0.911274	0.550262	1.45718	1.11238	0.210476	0.507538	0.155441	2.19646	1.61047	2.13012
	-0.781437	0.345399	1.16495	0.728451	0.0450134	-1.2609	0.688492	0.766304	0.182045	-0.0270958	0.821331		-0.781437	1.15574	1.05883	1.92146	2.58588	2.77567	1.29263	0.338547	1.07992	2.50034	-0.531136	-0.34399	-0.883652	1.17543	1.21477	0.529041	0.563004	1.97689	1.51674	0.522938	0.0571251	0.479977	3.44164	2.92443	-0.514412	1.01335	-1.53075	0.943306	0.563717	1.33875	1.09296	0.240471	0.500004	0.121368	2.09751	1.66071	2.2216
	-0.771197	0.311031	1.12899	0.70174	-0.0895386	-1.26197	0.618542	0.79583	0.171791	-0.00466156	0.738552		-0.771197	1.16728	0.962654	1.86145	2.66539	2.7539	1.27461	0.307816	1.01445	2.44937	-0.611313	-0.50045	-0.842903	1.04841	1.25611	0.476589	0.506306	1.98934	1.51903	0.588577	-0.0328064	0.524345	3.44238	3.05862	-0.503227	0.982571	-1.47381	1.01616	0.538685	1.30202	1.06588	0.210667	0.521683	0.143623	2.12604	1.69071	2.28715
	-0.760957	0.319042	1.0813	0.691822	-0.0666847	-1.21082	0.537552	0.797871	0.203575	0.113403	0.723366		-0.760957	1.17846	0.910034	1.77709	2.77061	2.61698	1.17704	0.357677	0.91626	2.35004	-0.815487	-0.575233	-0.782547	0.984528	1.26901	0.554993	0.445118	1.93424	1.56886	0.577332	-0.0611649	0.506058	3.5777	3.12438	-0.405121	0.998108	-1.38717	1.19368	0.55175	1.33566	1.04151	0.262737	0.578968	0.230328	2.20243	1.64201	2.38027
	-0.750717	0.299053	1.08166	0.671986	-0.101326	-1.20201	0.475014	0.753452	0.165878	0.149132	0.697697		-0.750717	1.19284	0.982826	1.70839	2.79455	2.54424	1.13456	0.336926	0.839584	2.27184	-1.03946	-0.468849	-0.893028	0.851311	1.30813	0.632145	0.475708	1.8918	1.46963	0.630966	-0.0669937	0.534153	3.63789	3.20594	-0.339088	1.04647	-1.28043	1.33696	0.527161	1.35238	0.917259	0.164749	0.756542	0.251118	2.20308	1.54359	2.38137
	-0.740477	0.299497	1.10595	0.668671	-0.202431	-1.1984	0.541306	0.835979	0.208214	0.0701523	0.666023		-0.740477	1.20645	1.05436	1.7494	2.78882	2.45072	1.18301	0.302856	0.804607	2.11507	-1.10327	-0.392029	-0.781128	0.82449	1.34145	0.731064	0.577831	1.8672	1.42527	0.687149	0.0303268	0.551414	3.82063	3.11329	-0.453407	1.06715	-1.26572	1.28702	0.52494	1.37125	0.877357	0.0838776	0.873081	0.302139	2.2225	1.35037	2.4605
	-0.730237	0.302864	1.11304	0.704838	-0.277794	-1.23185	0.562813	0.942902	0.298882	0.0363617	0.57658		-0.730237	1.22961	1.06509	1.71144	2.82972	2.39121	1.29469	0.307816	0.695984	2.04218	-1.05201	-0.280533	-0.644253	0.907612	1.36953	0.818695	0.657024	1.85	1.42469	0.684444	0.158302	0.55019	3.86447	3.11026	-0.516769	1.08083	-1.19762	1.18164	0.565186	1.38369	0.923561	0.0860367	0.845615	0.353123	2.17529	1.19564	2.41422
	-0.719997	0.325818	1.12603	0.696091	-0.251209	-1.17902	0.648319	0.971031	0.334774	0.0806808	0.505672		-0.719997	1.23894	1.02676	1.6784	2.95978	2.25792	1.36797	0.285019	0.609566	1.95264	-0.971531	-0.238846	-0.627548	0.877548	1.3919	0.790493	0.651924	1.75804	1.46966	0.718132	0.229717	0.527382	3.96489	3.06148	-0.498245	1.0556	-1.17708	1.13231	0.603523	1.37204	1.06137	0.156822	0.818935	0.349213	2.16769	1.11452	2.32124
	-0.709757	0.349664	1.0997	0.66143	-0.334106	-1.06733	0.660755	1.04428	0.480965	0.160156	0.441109		-0.709757	1.24743	0.965595	1.66599	3.03351	2.1307	1.23086	0.328819	0.592152	1.91949	-1.00604	-0.227245	-0.564766	0.822773	1.33917	0.84156	0.663654	1.75693	1.48817	0.76487	0.252121	0.51334	4.07568	3.08549	-0.439835	1.11182	-1.17806	1.09736	0.67765	1.38261	1.23106	0.273148	0.807037	0.382401	2.11026	1.09134	2.34687
	-0.699517	0.363923	1.03759	0.597847	-0.2784	-1.01887	0.697578	1.03489	0.581169	0.152145	0.471367		-0.699517	1.24968	0.937241	1.6345	3.05843	2.0649	1.20713	0.395718	0.613918	1.95508	-1.10559	-0.223183	-0.543499	0.789261	1.38126	0.889557	0.686741	1.79679	1.54934	0.842262	0.238506	0.5625	4.15627	3.1544	-0.30291	1.27582	-1.16385	1.0653	0.615646	1.45818	1.19445	0.335281	0.814842	0.40044	2.06282	1.05547	2.30629
	-0.689277	0.363496	0.951958	0.652683	-0.227474	-0.951385	0.638416	0.961243	0.649002	0.115837	0.481186		-0.689277	1.26099	0.91555	1.58763	3.0435	1.9416	1.33927	0.416351	0.561237	1.7926	-1.08401	-0.17923	-0.439072	0.803413	1.39154	0.930038	0.724483	1.82915	1.45804	0.919937	0.253597	0.677944	4.16646	3.25069	-0.239452	1.28937	-1.17422	0.997917	0.628414	1.36557	1.28854	0.426712	0.83046	0.436092	2.06482	0.999275	2.31068
	-0.679037	0.360009	0.92865	0.718582	-0.272438	-0.874199	0.568771	0.879791	0.67905	0.109734	0.502136		-0.679037	1.26871	0.924423	1.5719	3.04092	1.75296	1.41075	0.351192	0.568142	1.62789	-1.04693	-0.0242538	-0.391293	0.777046	1.32685	0.992554	0.833344	1.84929	1.3863	1.07527	0.203384	0.734665	4.16526	3.33183	-0.260315	1.31481	-1.18829	1.00111	0.616135	1.31469	1.24487	0.566723	0.836914	0.407814	2.0451	1.0453	2.34665
	-0.668797	0.365978	1.00708	0.809074	-0.311005	-0.790108	0.589432	0.848282	0.692688	0.0456581	0.402702		-0.668797	1.27571	0.833645	1.46811	3.07199	1.66592	1.46531	0.384521	0.630905	1.58565	-0.957726	-0.0372734	-0.316032	0.684086	1.30505	1.05957	0.899689	1.75056	1.29808	1.27788	0.114418	0.750092	4.23179	3.35085	-0.173115	1.30872	-1.14389	1.00112	0.589005	1.32802	1.23092	0.620605	0.866188	0.424194	2.05634	1.09146	2.34164
	-0.658557	0.421891	1.07574	0.950348	-0.240944	-0.725697	0.615917	0.903282	0.762535	0.0922928	0.363541		-0.658557	1.29051	0.866379	1.46184	3.12891	1.67496	1.51624	0.296844	0.668621	1.55571	-0.891136	-0.0319099	-0.215561	0.66457	1.31261	1.15728	0.889626	1.62385	1.31139	1.27277	0.0587845	0.788441	4.28443	3.41658	-0.0744324	1.27382	-1.07697	1.00784	0.568821	1.40508	1.32185	0.623131	1.03878	0.392151	2.04569	1.04637	2.25586
	-0.648317	0.47794	1.05117	0.998329	-0.121235	-0.634659	0.717712	1.00328	0.796379	0.142704	0.347782		-0.648317	1.3136	0.811783	1.49775	3.44509	1.72172	1.58773	0.475494	0.698425	1.52502	-0.840149	0.101162	-0.185081	0.599567	1.30243	1.24516	0.908615	1.58651	1.34815	1.38237	0.00502014	0.832428	4.2672	3.50355	0.0146179	1.3483	-0.978027	0.998631	0.60133	1.46151	1.41143	0.534668	1.06739	0.354927	2.08702	1.02598	2.15437
	-0.638076	0.515642	0.915016	1.05382	-0.0979156	-0.568508	0.747288	1.09023	0.906826	0.205639	0.388386		-0.638076	1.34251	0.757305	1.53661	3.57167	1.72134	1.61266	0.647118	0.625053	1.53096	-0.772747	0.184631	-0.182209	0.578667	1.27048	1.29617	0.975719	1.61338	1.40804	1.43446	-0.00408554	0.92329	4.22796	3.52689	-0.00512695	1.41155	-0.923084	1.05319	0.666763	1.43413	1.45561	0.551487	1.1244	0.430943	2.03551	0.958099	2.14565
	-0.627836	0.561219	0.889778	1.1301	0.0182037	-0.448009	0.831917	1.10184	0.883827	0.222446	0.420868		-0.627836	1.34869	0.732796	1.55005	3.46706	1.62012	1.65002	0.665165	0.641289	1.51295	-0.69101	0.218121	-0.113808	0.587479	1.32663	1.36578	1.0297	1.577	1.50421	1.49659	0.0499268	0.902119	4.1467	3.5298	-0.0249252	1.47073	-0.78907	1.0539	0.640026	1.44407	1.49139	0.608269	1.18256	0.488163	1.97868	0.855175	2.14081
	-0.617596	0.603466	0.845718	1.28121	0.0706329	-0.327156	0.867775	1.06121	0.854828	0.290905	0.486065		-0.617596	1.36134	0.765743	1.46619	3.28975	1.57501	1.70345	0.489738	0.689758	1.42551	-0.638435	0.37431	-0.0906563	0.575878	1.45165	1.44248	1.08595	1.61647	1.49411	1.63521	0.13237	0.937595	3.98076	3.58694	-0.0457153	1.54895	-0.652035	1.03688	0.680748	1.50854	1.49765	0.688332	1.18429	0.600006	1.97313	0.672413	2.10868
	-0.607356	0.661171	0.816715	1.36765	0.151089	-0.199738	0.845528	1.12866	0.904274	0.43092	0.505436		-0.607356	1.36567	0.877632	1.42332	3.13286	1.38141	1.72734	0.38065	0.643982	1.35968	-0.580223	0.460457	-0.0172234	0.54776	1.60849	1.54731	1.13566	1.50542	1.41999	1.73023	0.165199	0.929012	4.043	3.60157	0.00413895	1.59209	-0.557423	0.997902	0.765099	1.55241	1.56548	0.74765	1.17878	0.625015	1.90662	0.588848	2.06175
	-0.597116	0.732576	0.873138	1.31069	0.277569	0.0267029	0.819481	1.24699	0.995613	0.527657	0.515343		-0.597116	1.37585	0.934498	1.34657	3.04026	1.16091	1.75791	0.405598	0.599194	1.31643	-0.551208	0.589077	0.0369072	0.582718	1.62512	1.57785	1.16713	1.46315	1.40092	1.74713	0.22588	0.97604	4.14861	3.58579	0.0229263	1.66004	-0.546978	1.01185	0.917686	1.5255	1.59623	0.803917	1.14764	0.694942	1.93378	0.566116	1.97672
	-0.586876	0.770654	0.839714	1.32434	0.449764	0.0414619	0.790894	1.38502	1.02232	0.591122	0.491249		-0.586876	1.39578	0.995125	1.24716	3.06063	1.052	1.81259	0.539677	0.625443	1.32858	-0.64621	0.811172	0.160709	0.660492	1.55411	1.61061	1.18349	1.4116	1.34122	1.8337	0.210476	1.0432	4.08279	3.62532	0.0496407	1.65057	-0.642082	1.07464	1.04604	1.50871	1.60794	0.892082	1.11064	0.773064	1.92167	0.543156	2.07492
	-0.576636	0.829167	0.847588	1.39792	0.527954	0.0648766	0.724709	1.47102	1.16453	0.729286	0.534618		-0.576636	1.40202	1.02562	1.11644	3.1251	1.00887	1.77298	0.606625	0.587296	1.34618	-0.652847	0.995495	0.170448	0.622417	1.52327	1.68304	1.18859	1.40094	1.40707	1.8609	0.221386	1.14229	4.0385	3.66402	0.0881577	1.58484	-0.749756	1.13571	1.05624	1.43566	1.67804	0.909843	1.07448	0.73774	1.85358	0.513237	2.22599
	-0.566396	0.90786	0.785591	1.57053	0.672638	0.0809555	0.710274	1.5682	1.3824	0.836456	0.563694		-0.566396	1.41535	1.08302	1.08356	3.03902	1.0116	1.67437	0.702206	0.55267	1.31259	-0.546837	1.12619	0.179077	0.673737	1.51338	1.70416	1.23272	1.35911	1.4372	1.95878	0.146889	1.25658	4.02792	3.61101	-0.018795	1.49359	-0.752625	1.16546	1.05794	1.40266	1.84068	0.905205	1.10593	0.729633	1.8721	0.520229	2.23658
	-0.556156	0.966891	0.846565	1.72585	0.771168	0.0896721	0.687824	1.69005	1.39497	0.888802	0.607109		-0.556156	1.4321	1.15468	1.203	2.95519	0.978699	1.64876	0.688854	0.588551	1.27454	-0.364563	1.20911	0.370312	0.659672	1.65641	1.73322	1.27675	1.27798	1.44534	2.00895	0.0863075	1.29345	4.07646	3.57772	-0.00329971	1.49765	-0.724659	1.18697	1.00319	1.37144	2.0101	0.995949	1.11164	0.888184	1.90219	0.491421	2.19881
	-0.545916	1.01692	0.898411	1.78328	0.828651	0.139526	0.709282	1.85035	1.39816	0.905254	0.639343		-0.545916	1.45186	1.221	1.26066	2.88749	0.982643	1.65625	0.712315	0.539589	1.28924	-0.243591	1.3575	0.442146	0.607063	1.70375	1.76028	1.3187	1.20754	1.53436	2.10825	0.166218	1.33867	4.00251	3.51324	0.141884	1.6024	-0.691422	1.19968	1.03753	1.34489	2.05622	1.03618	1.16428	0.988308	1.93899	0.463463	2.20192
	-0.535676	1.06272	0.861599	1.8002	0.914001	0.23967	0.819958	1.89847	1.40638	0.882351	0.74189		-0.535676	1.46951	1.25776	1.22007	2.89213	1.05154	1.6891	0.703453	0.431347	1.29142	-0.105404	1.64716	0.513138	0.631119	1.61885	1.79842	1.31978	1.21688	1.56521	2.24062	0.211945	1.40803	4.001	3.45411	0.21595	1.77161	-0.644333	1.18293	1.0533	1.41191	2.02164	0.879932	1.25563	1.09284	1.99479	0.447609	2.2362
	-0.525436	1.14017	0.930534	1.85501	1.10104	0.378731	0.8755	2.00309	1.52295	0.767281	0.82737		-0.525436	1.49264	1.31282	1.17893	2.86308	1.07744	1.8386	0.778954	0.467697	1.32561	0.147942	1.92735	0.668732	0.646423	1.6365	1.85639	1.32837	1.32549	1.50165	2.34196	0.213711	1.49067	4.00976	3.42934	0.196579	1.74287	-0.562294	1.16196	1.04861	1.4501	2.09276	0.881744	1.40817	1.13664	1.96132	0.326912	2.15267
	-0.515196	1.22746	0.971138	1.96087	1.2899	0.461628	0.849083	2.08036	1.68493	0.774529	0.974667		-0.515196	1.52262	1.34957	1.22916	2.93627	1.07307	1.97995	0.919121	0.499107	1.30289	0.345913	2.09543	0.839615	0.670937	1.659	1.86967	1.38671	1.33575	1.48375	2.40307	0.219276	1.47035	4.05843	3.4107	0.2826	1.7978	-0.494099	1.13163	1.0947	1.4855	2.2016	1.02213	1.55623	1.10042	1.90678	0.269619	2.27431
	-0.504956	1.30786	1.0211	1.98315	1.4726	0.58688	0.885498	2.1272	1.7689	0.823643	1.10173		-0.504956	1.55362	1.39469	1.4012	3.02252	1.13306	2.16061	1.03628	0.594822	1.23829	0.389862	2.2892	0.99794	0.629711	1.75882	1.89822	1.41328	1.19938	1.54078	2.35083	0.277271	1.53128	4.09539	3.39542	0.29134	1.87933	-0.417336	1.10231	1.05347	1.41494	2.33201	1.10227	1.79796	1.21837	1.95217	0.242844	2.46899
	-0.494716	1.36141	1.00107	2.01013	1.62978	0.704037	0.879372	2.15252	1.88891	0.944427	1.04247		-0.494716	1.58368	1.4759	1.55808	3.03807	1.14951	2.28788	1.16794	0.656906	1.14342	0.458374	2.5233	1.12733	0.584198	1.70121	2.01876	1.43278	1.07635	1.56812	2.40673	0.206017	1.58548	3.98185	3.3222	0.348774	1.90164	-0.278625	1.10799	1.02029	1.404	2.47895	1.07767	1.94454	1.26679	1.93229	0.309959	2.47277
	-0.484476	1.42113	1.01938	2.05782	1.78107	0.756393	0.891983	2.16636	1.94118	1.07691	1.09909		-0.484476	1.61263	1.60147	1.69703	3.02383	1.21118	2.39904	1.26558	0.658848	1.05107	0.498428	2.66721	1.30899	0.624908	1.6496	2.11774	1.47548	1.02278	1.60961	2.48964	0.17511	1.54356	3.99715	3.29573	0.428963	1.91562	-0.133251	1.16736	0.956264	1.40142	2.62274	1.14212	2.02617	1.37757	1.87363	0.229515	2.49845
	-0.474236	1.49595	1.07965	2.14685	1.95153	0.837948	0.892475	2.14301	1.95936	1.20516	1.24756		-0.474236	1.63788	1.62534	1.79048	3.04906	1.30317	2.42619	1.27657	0.641155	0.985027	0.492096	2.83388	1.37392	0.61013	1.58056	2.09274	1.57775	1.09644	1.50098	2.58691	0.181984	1.5849	4.03091	3.26449	0.563526	1.90844	-0.0455132	1.29983	0.953697	1.34192	2.77374	1.18789	2.0705	1.45273	1.79601	0.150482	2.50849
	-0.463996	1.59427	1.22374	2.18099	2.11032	1.02136	0.998699	2.11239	2.073	1.33233	1.29558		-0.463996	1.681	1.60131	1.93605	3.01826	1.4677	2.39474	1.34315	0.712456	1.01736	0.567459	3.00105	1.38655	0.61182	1.58288	2.1944	1.61822	1.17251	1.55048	2.6298	0.263134	1.69737	4.04526	3.273	0.597023	1.95673	-0.0149956	1.39941	1.01883	1.22024	2.87128	1.2563	2.18752	1.56616	1.77983	0.196671	2.59187
	-0.453756	1.69802	1.30023	2.32574	2.26855	1.26482	1.08558	2.27189	2.11611	1.37975	1.26952		-0.453756	1.72516	1.67543	2.03959	3.00584	1.42803	2.4058	1.44514	0.734558	1.11381	0.650097	3.12212	1.48244	0.527111	1.66051	2.27826	1.63342	1.32669	1.65467	2.69106	0.22842	1.73792	4.15129	3.30824	0.575878	2.05292	0.0493317	1.38631	1.1073	1.21665	2.8269	1.40655	2.2998	1.62299	1.86008	0.172138	2.67255
	-0.443516	1.78499	1.45683	2.45071	2.39828	1.44128	1.05161	2.41098	2.15137	1.38385	1.31997		-0.443516	1.77478	1.81772	2.13206	3.02482	1.48689	2.47211	1.5155	0.769608	1.28019	0.744217	3.33406	1.66494	0.5243	1.71622	2.32457	1.71343	1.42558	1.75354	2.71248	0.200417	1.87432	4.09521	3.22927	0.61039	2.05313	0.055233	1.42458	1.15804	1.21265	2.7962	1.63695	2.4253	1.82241	1.9571	0.188972	2.69946
	-0.433276	1.89105	1.61253	2.61921	2.55867	1.5777	1.05719	2.48796	2.12822	1.56634	1.41161		-0.433276	1.83632	2.00652	2.30382	3.01685	1.45253	2.58013	1.66275	0.908638	1.34802	0.923195	3.47864	1.78937	0.571625	1.74475	2.41496	1.87954	1.50031	1.75281	2.75855	0.17524	1.97849	3.95868	3.10772	0.686169	2.01864	0.168648	1.63403	1.12984	1.23951	2.87561	1.71237	2.46607	1.9925	1.98962	0.243713	2.89866
	-0.423036	2.0109	1.72455	2.8843	2.72066	1.77491	1.1019	2.59829	2.17658	1.66596	1.45095		-0.423036	1.89062	2.06955	2.4375	2.96942	1.61058	2.64058	1.80151	0.991203	1.31587	1.11058	3.56552	1.85797	0.671257	1.76287	2.5084	1.90842	1.51133	1.83709	2.80399	0.0901375	2.10851	3.95136	3.03276	0.819733	2.01456	0.255051	1.83251	0.998402	1.30907	2.9475	1.80066	2.44693	2.18868	1.99143	0.308506	3.07448
	-0.412796	2.13154	1.9294	3.10222	2.86939	1.87378	1.18542	2.62616	2.27357	1.77745	1.54648		-0.412796	1.95012	2.1192	2.65249	2.9284	1.79906	2.66809	1.8969	1.04386	1.24678	1.29356	3.70424	1.90609	0.77021	1.74963	2.77881	1.97451	1.61779	2.01925	2.80525	0.115871	2.25028	4.0357	3.00431	1.00841	2.03585	0.309086	1.91135	0.941578	1.35994	3.01921	1.83064	2.53989	2.26738	2.02048	0.280643	3.17087
	-0.402556	2.26353	2.02912	3.22323	2.95545	1.90355	1.37405	2.70576	2.50862	1.90759	1.76442		-0.402556	2.01959	2.26785	2.88726	2.9681	1.84212	2.6911	1.94836	1.07149	1.32672	1.58831	3.86632	2.05046	0.855961	1.84959	2.84608	1.97691	1.58886	2.10433	2.80585	0.123764	2.36892	4.09554	2.96892	1.19064	2.04482	0.434353	2.06139	0.952053	1.40929	3.09537	1.83207	2.60767	2.3558	2.10187	0.360062	3.28783
	-0.392316	2.42177	2.20846	3.23853	3.07776	2.21991	1.62954	2.84742	2.63179	2.06373	1.87875		-0.392316	2.09098	2.34424	3.00905	2.99374	1.90329	2.74775	1.93236	1.22695	1.36201	1.8107	3.9502	2.32612	1.00547	1.91779	2.84917	2.07079	1.65598	2.13577	2.84821	0.253105	2.53817	4.02218	2.91524	1.31972	2.01431	0.735142	2.22047	0.943508	1.39367	3.23665	1.85232	2.5726	2.42007	2.19467	0.411789	3.39053
	-0.382076	2.55508	2.24712	3.32843	3.25776	2.44835	1.86641	3.00444	2.72371	2.16348	1.95599		-0.382076	2.16437	2.42695	3.21633	2.95589	1.99285	2.84481	1.93199	1.36491	1.46865	1.84349	4.02874	2.33931	1.12907	1.85081	2.91488	2.20064	1.64615	2.08339	2.94546	0.386517	2.79504	3.98458	2.84261	1.40971	2.06308	1.00217	2.35533	0.962036	1.52452	3.3803	1.92243	2.70511	2.56998	2.20361	0.498669	3.4928
	-0.371836	2.70226	2.43529	3.43556	3.45421	2.54836	2.06854	3.17424	2.80362	2.27953	2.12099		-0.371836	2.2294	2.50568	3.40113	2.96662	2.13386	3.00352	1.90629	1.43375	1.41129	2.01875	4.18517	2.25326	1.12831	1.73311	2.98145	2.25558	1.71568	2.1268	3.05962	0.423161	2.9675	4.04573	2.81374	1.53442	2.07857	1.13298	2.43716	0.959053	1.61569	3.3938	2.08192	2.8847	2.65915	2.18908	0.469471	3.53273
	-0.361596	2.85949	2.62725	3.64193	3.60252	2.65243	2.31861	3.30495	2.93034	2.40282	2.25459		-0.361596	2.29362	2.63969	3.5835	3.0141	1.88301	3.14547	1.93872	1.48964	1.42133	2.21538	4.25716	2.29082	1.04556	1.7759	3.04284	2.19287	1.86121	2.18507	3.20093	0.540066	3.07201	4.09274	2.86481	1.59675	2.13572	1.31128	2.58311	0.969696	1.74781	3.37296	2.24099	3.06968	2.85503	2.13993	0.577606	3.63145
	-0.351356	3.02352	2.70744	3.88756	3.74446	2.72401	2.57208	3.34676	3.10902	2.71642	2.40389		-0.351356	2.37034	2.69761	3.89155	3.14082	1.60815	3.08315	1.99627	1.57045	1.54262	2.40312	4.28401	2.39333	1.0528	2.24315	3.07114	2.12435	1.96285	2.2722	3.33006	0.753284	3.20746	4.07779	2.89556	1.6998	2.05798	1.40836	2.74877	0.928799	1.89895	3.3479	2.46902	3.14269	3.01857	2.10611	0.73209	3.61226
	-0.341116	3.178	2.76829	4.10686	3.93883	2.94502	2.69044	3.30436	3.21663	3.07856	2.55305		-0.341116	2.45923	2.79936	3.99033	3.2351	1.79319	3.11361	2.08391	1.60653	1.60458	2.60339	4.40414	2.47633	1.09353	2.45271	3.13366	2.20184	1.94545	2.43975	3.43212	0.889732	3.35132	3.98183	3.04259	1.77351	2.10752	1.48379	2.921	0.988701	2.08246	3.35094	2.73956	3.37003	3.14743	2.22585	0.89753	3.70044
	-0.330876	3.34789	2.98673	4.222	4.10798	3.20193	2.81632	3.27499	3.41382	3.33689	2.77033		-0.330876	2.54812	2.8201	4.04941	3.36664	2.08223	3.19316	2.14051	1.71218	1.67162	2.74553	4.48326	2.5919	1.2115	2.34644	3.12263	2.24261	2.00526	2.4456	3.53389	0.935005	3.48439	3.99017	3.07093	1.93324	2.24576	1.67391	3.15108	1.03375	2.20687	3.28545	2.93129	3.52656	3.19173	2.3812	0.927414	3.81556
	-0.320636	3.50167	3.17165	4.34588	4.18445	3.43965	2.9901	3.39162	3.54426	3.48795	2.9595		-0.320636	2.64192	2.84839	4.19902	3.56802	2.3644	3.23982	2.20157	1.93002	1.7239	2.89462	4.50171	2.64479	1.36864	2.27186	3.108	2.39563	2.13603	2.46101	3.61938	1.08031	3.69884	4.00641	3.05218	2.05436	2.34617	1.82804	3.28169	1.12751	2.39265	3.2146	3.10503	3.60958	3.19811	2.53741	1.07365	3.89952
	-0.310396	3.67561	3.34805	4.48405	4.21411	3.65469	3.40831	3.50803	3.69465	3.64863	3.11998		-0.310396	2.74604	2.99088	4.36501	3.74222	2.5449	3.31314	2.15751	2.17568	1.94562	3.00748	4.58955	2.73558	1.51007	2.25482	3.12292	2.48946	2.1946	2.4743	3.62463	1.16723	3.93628	4.0489	3.09501	2.19183	2.43354	2.04101	3.44229	1.31616	2.56453	3.11755	3.19903	3.76135	3.32763	2.6066	1.18713	4.03424
	-0.300156	3.83456	3.52893	4.7238	4.28555	3.86404	3.70464	3.53637	3.77984	3.84724	3.24061		-0.300156	2.8451	3.10035	4.43821	3.79596	2.8131	3.45922	2.17304	2.36921	2.02223	3.13036	4.68184	2.85658	1.63248	2.20279	3.16848	2.54797	2.31872	2.51901	3.73066	1.26669	4.19513	4.01683	3.21967	2.35305	2.50104	2.22346	3.60712	1.47149	2.76586	3.03263	3.14603	3.9263	3.46281	2.71144	1.36999	4.0745
	-0.289916	3.96152	3.68185	4.89596	4.26177	3.92476	3.93645	3.63308	3.92617	4.01412	3.37951		-0.289916	2.95239	3.13927	4.56129	3.93208	3.04794	3.5908	2.26206	2.52179	2.13155	3.2213	4.72312	2.9838	1.755	2.19176	3.32549	2.55913	2.58854	2.5691	3.93543	1.36306	4.31728	4.07525	3.36931	2.49275	2.63974	2.49042	3.77981	1.57769	2.86829	3.07495	3.20127	4.08698	3.65852	2.85305	1.45292	4.11121
	-0.279676	4.14746	3.92976	5.06637	4.33401	4.10196	4.14328	3.87312	4.09838	4.24657	3.53367		-0.279676	3.04583	3.21497	4.66753	4.03792	3.1667	3.64742	2.3381	2.73473	2.21617	3.33955	4.69283	3.11465	1.84674	2.23352	3.45029	2.67824	2.73382	2.59067	4.14272	1.53999	4.52391	4.14373	3.30982	2.64765	2.70042	2.81706	3.96439	1.64201	3.01244	3.09227	3.30408	4.12942	3.80914	2.91053	1.53742	4.05655
	-0.269436	4.34843	4.17297	5.12961	4.52018	4.39446	4.27322	4.01561	4.34069	4.44082	3.84833		-0.269436	3.13971	3.27596	4.80177	4.08663	3.28756	3.56438	2.39836	2.93906	2.35489	3.46593	4.7093	3.13039	1.89923	2.32758	3.57725	2.85478	2.83673	2.59151	4.30409	1.67057	4.72285	4.109	3.19387	2.74652	2.77557	3.07278	4.12619	1.70063	3.2334	3.19001	3.44019	4.21297	3.8769	2.96617	1.68447	4.01337
	-0.259196	4.53657	4.31582	5.2938	4.56375	4.6877	4.50499	4.10503	4.52327	4.69786	4.13688		-0.259196	3.2409	3.42803	4.90768	4.17625	3.30102	3.59375	2.5872	3.06915	2.45623	3.61497	4.68169	3.2331	1.87078	2.45549	3.6941	2.89562	2.967	2.70696	4.37758	1.80724	4.87231	3.97039	3.19131	2.89402	2.82599	3.17857	4.23867	1.84514	3.4272	3.20663	3.64118	4.25606	4.0458	3.05767	1.83588	4.0225
	-0.248956	4.69926	4.34359	5.38073	4.62453	4.99633	4.79285	4.24139	4.58918	4.94441	4.38034		-0.248956	3.33598	3.51745	4.98457	4.34261	3.38816	3.60687	2.77511	3.06668	2.58287	3.71866	4.62551	3.37562	2.03304	2.51564	3.78808	2.94073	3.21466	2.71188	4.49689	1.9853	5.02333	3.93231	3.25158	2.99535	2.94087	3.32258	4.39848	1.99819	3.57854	3.23726	3.92559	4.35462	4.21587	3.16555	1.99812	4.10063
	-0.238715	4.89489	4.45032	5.49831	4.83606	5.12813	5.11037	4.31334	4.81388	5.25692	4.64664		-0.238715	3.44288	3.52526	5.03885	4.45074	3.46661	3.51722	2.91595	3.13021	2.83933	3.86469	4.55364	3.53729	2.13516	2.61638	3.83911	3.09908	3.37534	2.83944	4.66306	2.17757	5.16602	3.95621	3.17354	3.08106	3.03638	3.50578	4.46645	2.10843	3.73363	3.22347	4.13053	4.46384	4.32768	3.27265	2.16918	4.21106
	-0.228475	5.05666	4.58733	5.70253	4.92164	5.25452	5.35902	4.40904	5.00216	5.48008	4.79368		-0.228475	3.56191	3.562	5.1918	4.52914	3.56037	3.4948	2.93753	3.17475	3.12742	3.93464	4.54412	3.77989	2.35619	2.61897	3.90058	3.22354	3.52983	2.92167	4.7962	2.40343	5.31672	4.10135	3.20701	3.1727	3.07573	3.71595	4.47768	2.26914	4.02976	3.20927	4.28213	4.54896	4.31908	3.39648	2.35497	4.36153
	-0.218235	5.17958	4.71252	5.82688	4.94978	5.43777	5.47423	4.54042	5.08177	5.65145	4.94139		-0.218235	3.68476	3.62251	5.31297	4.63175	3.63549	3.49044	3.10155	3.25623	3.29076	4.04461	4.5405	3.9954	2.61282	2.60294	4.00798	3.40728	3.71859	2.95737	4.85616	2.63651	5.40567	4.18139	3.41396	3.32033	3.18452	3.92899	4.65304	2.34894	4.27146	3.13076	4.3087	4.58245	4.39401	3.52581	2.59242	4.45848
	-0.207995	5.35177	4.83783	5.96269	5.033	5.71159	5.7869	4.79396	5.09448	5.9145	5.03098		-0.207995	3.80758	3.66788	5.42882	4.75513	3.76234	3.53383	3.2858	3.28121	3.47784	4.24103	4.64513	4.08435	2.81686	2.79668	4.06824	3.55251	3.8651	2.99977	4.93459	2.88087	5.54156	4.17255	3.54526	3.49947	3.27925	4.19669	4.88261	2.60319	4.47288	2.98618	4.4192	4.70856	4.48986	3.65644	2.81732	4.44184
	-0.197755	5.54361	5.04491	6.26054	5.08076	5.98679	6.04976	4.99977	5.21951	6.10593	5.14456		-0.197755	3.92572	3.69453	5.46151	5.04797	3.85006	3.61521	3.38189	3.37222	3.63237	4.34647	4.61352	4.09047	2.97031	2.93201	4.15865	3.61391	4.03318	3.01167	5.07982	3.01104	5.76075	4.16627	3.67355	3.62184	3.33961	4.34472	5.09659	2.88946	4.7476	3.01644	4.56983	4.7318	4.58768	3.77135	3.03282	4.40574
	-0.187515	5.65574	5.1805	6.24033	5.10999	6.24459	6.1398	5.02626	5.34599	6.32297	5.29126		-0.187515	4.03954	3.71505	5.46619	5.23182	3.97159	3.63672	3.44149	3.47251	3.72141	4.45547	4.63465	4.08493	3.111	2.95795	4.31987	3.78741	4.19294	3.10064	5.17632	3.25252	6.01741	4.15933	3.72309	3.70203	3.36797	4.58194	5.21906	3.11761	4.98381	3.12234	4.64559	4.67533	4.70082	3.81046	3.19324	4.34891
	-0.177275	5.76351	5.29538	6.08585	5.13927	6.30228	6.39361	5.14755	5.4685	6.54632	5.49284		-0.177275	4.15551	3.84974	5.40389	5.32079	4.04787	3.65483	3.5597	3.60465	3.82402	4.59661	4.63499	4.21492	3.24358	3.02591	4.48938	3.93076	4.41269	3.27353	5.22417	3.43351	6.17511	4.20454	3.78076	3.82087	3.46663	4.77555	5.42339	3.27409	5.194	3.14467	4.7545	4.72744	4.81148	3.80399	3.38052	4.44113
	-0.167035	5.94655	5.35668	6.28846	5.20181	6.52364	6.68895	5.25306	5.6039	6.85958	5.74291		-0.167035	4.26764	3.9851	5.27842	5.37404	4.17789	3.6828	3.70002	3.79554	3.96704	4.7188	4.71205	4.28084	3.40118	3.10492	4.54378	4.04046	4.57166	3.39575	5.26839	3.66754	6.32577	4.32759	3.83021	4.02827	3.51304	4.91382	5.58839	3.39064	5.33141	3.06087	4.90118	4.7631	4.89106	3.86721	3.53617	4.49202
	-0.156795	6.12462	5.4785	6.63282	5.26738	6.70711	6.86399	5.24583	5.78181	7.13202	6.01214		-0.156795	4.38523	4.04384	5.3223	5.54887	4.19814	3.76756	3.80793	3.92725	4.1872	4.81482	4.80029	4.32935	3.55074	3.24861	4.74075	4.05664	4.78769	3.37591	5.29497	4.02071	6.42853	4.47112	3.89709	4.13078	3.65466	5.06424	5.82166	3.43539	5.41768	3.08985	5.02182	4.84358	4.9803	3.96556	3.65726	4.57205
	-0.146555	6.28746	5.66708	6.88611	5.28092	6.89982	7.00578	5.38888	5.94226	7.29745	6.21883		-0.146555	4.49596	4.09162	5.42314	5.71382	4.23618	3.8166	3.81837	4.04008	4.38564	4.71714	4.93274	4.42531	3.73336	3.34171	4.94766	4.13797	5.01207	3.49092	5.35529	4.19518	6.52336	4.64521	3.8946	4.25923	3.75508	5.2021	6.01846	3.50746	5.59273	3.10175	5.21397	4.87844	5.05234	4.10391	3.86066	4.62912
	-0.136315	6.44666	5.82472	7.00863	5.42742	7.06041	7.22179	5.55764	6.03772	7.49413	6.38746		-0.136315	4.61027	4.10847	5.51568	5.83899	4.27339	3.84632	3.98375	4.091	4.51847	4.77903	5.08541	4.60686	3.80633	3.41182	5.13124	4.31273	5.19159	3.61669	5.40465	4.324	6.66988	4.91402	3.85186	4.44627	3.90934	5.41506	6.0906	3.62914	5.65263	3.19356	5.39214	4.8736	5.1396	4.21516	4.05736	4.76472
	-0.126075	6.57424	5.98832	7.16285	5.51245	7.21134	7.40036	5.65834	6.06229	7.59018	6.58205		-0.126075	4.7172	4.05346	5.56101	6.06403	4.32159	3.84202	4.09811	4.17447	4.6665	4.92622	5.21382	4.77106	3.90242	3.41555	5.24216	4.43869	5.40257	3.72533	5.41048	4.45924	6.88204	5.09142	3.83176	4.72318	4.03542	5.64382	6.20689	3.70915	5.74008	3.29568	5.48721	4.91617	5.19698	4.25245	4.30242	4.83304
	-0.115835	6.69611	6.02338	7.33428	5.55235	7.41405	7.517	5.81027	6.20923	7.70153	6.70291		-0.115835	4.81767	3.99616	5.64085	6.27329	4.39563	3.93554	4.25476	4.20663	4.85729	5.01763	5.31631	4.87482	3.98419	3.40182	5.33378	4.53832	5.64766	3.74811	5.42686	4.61785	6.98289	5.18792	3.8924	4.88722	4.20017	5.78902	6.37234	3.84823	5.84357	3.31749	5.5822	4.99701	5.27705	4.21633	4.50911	4.73555
	-0.105595	6.76683	6.07936	7.49556	5.53442	7.40782	7.56959	5.87867	6.33533	7.75829	6.84245		-0.105595	4.92054	4.07327	5.65754	6.52256	4.48719	4.08206	4.37817	4.32088	5.04002	4.96184	5.36168	4.92004	4.17052	3.52538	5.42228	4.60099	5.79692	3.76746	5.53892	4.81175	6.96748	5.26244	3.98961	5.06133	4.34828	5.88547	6.45529	3.97074	6.01538	3.32771	5.65874	5.10617	5.437	4.26455	4.65564	4.69307
	-0.0953551	6.81965	6.13	7.61708	5.48444	7.38666	7.57914	5.97751	6.53623	7.8066	6.85923		-0.0953551	5.01314	4.10007	5.64117	6.64119	4.56842	4.11008	4.51251	4.45123	5.10215	5.03607	5.46254	5.0751	4.3237	3.66888	5.4611	4.69965	5.91114	3.89768	5.68267	5.00385	6.98574	5.30398	4.10676	5.18977	4.36787	6.00065	6.61382	4.10823	6.08528	3.3391	5.63459	5.07374	5.49338	4.3309	4.82665	4.82355
	-0.0851151	6.93539	6.2799	7.87238	5.48036	7.47329	7.66773	6.09485	6.73636	7.91985	6.89381		-0.0851151	5.0908	4.09554	5.6482	6.84045	4.65171	4.08588	4.53257	4.53168	5.17643	5.03507	5.48223	5.14798	4.41183	3.83652	5.5322	4.77808	5.98209	4.05115	5.82816	5.09835	7.03146	5.28561	4.16792	5.34689	4.36366	6.08144	6.73969	4.17578	6.16769	3.37362	5.71501	5.1727	5.55233	4.41322	4.81794	4.97366
	-0.0748751	7.02537	6.23537	8.00805	5.44063	7.7273	7.78828	6.11726	6.80407	8.01617	7.09116		-0.0748751	5.16346	4.17016	5.62303	6.96868	4.85212	4.05019	4.57444	4.54885	5.28349	4.99573	5.44466	5.24501	4.46951	3.89186	5.64655	4.89571	6.10955	4.14276	5.99277	5.14837	7.11514	5.37452	4.24999	5.4367	4.42102	6.27054	6.81168	4.30201	6.22113	3.41125	5.84566	5.1589	5.50715	4.57815	4.86242	5.13411
	-0.064635	7.10828	6.26591	8.07038	5.47364	7.91858	7.92738	6.14382	6.85047	8.05535	7.26894		-0.064635	5.22181	4.15758	5.60307	7.05965	4.89776	4.03428	4.69563	4.59412	5.34707	5.06449	5.50607	5.31604	4.46175	3.89105	5.66783	4.91927	6.24696	4.29908	5.96892	5.30591	7.21753	5.35646	4.2356	5.40049	4.44987	6.29771	6.90531	4.31167	6.21686	3.46374	5.91511	5.08914	5.55378	4.71746	4.94011	5.20917
	-0.054395	7.19462	6.42229	8.17316	5.4996	8.0459	7.95433	6.18204	6.90808	8.10155	7.46463		-0.054395	5.2728	4.25818	5.63849	7.18958	4.87209	4.09079	4.78445	4.5648	5.39983	5.1475	5.53745	5.3288	4.54555	3.90483	5.75286	4.93422	6.3166	4.40668	6.00834	5.40694	7.24722	5.45204	4.16743	5.4736	4.46299	6.43169	6.93479	4.31141	6.20762	3.56679	6.00245	5.08971	5.59108	4.71371	5.07257	5.20407
	-0.044155	7.25736	6.52975	8.30286	5.5016	8.05353	7.91148	6.26403	7.05943	8.18143	7.51214		-0.044155	5.30408	4.31499	5.79493	7.16486	4.95319	4.12656	4.75283	4.61354	5.39463	5.31881	5.52966	5.37569	4.55035	3.82635	5.80138	5.03614	6.36726	4.37944	5.94908	5.41297	7.29566	5.45309	4.1827	5.56592	4.37057	6.51103	6.99978	4.33289	6.19651	3.56042	5.95167	5.15908	5.65165	4.70918	5.19978	5.14943
	-0.033915	7.32168	6.54824	8.38309	5.54266	8.09863	7.92694	6.36229	7.21864	8.18838	7.62621		-0.033915	5.32697	4.40475	5.7915	7.22964	5.0019	4.22149	4.80769	4.60403	5.52053	5.41706	5.49114	5.37977	4.59792	3.88274	5.88298	5.05511	6.36323	4.38653	5.87204	5.40232	7.3707	5.50742	4.23229	5.63151	4.22454	6.55865	7.01592	4.38026	6.28291	3.60751	5.94311	5.28362	5.71695	4.66495	5.26556	5.09153
	-0.0236749	7.37462	6.48589	8.41776	5.60919	8.11477	7.98624	6.42991	7.37234	8.24754	7.70795		-0.0236749	5.33575	4.40315	5.81024	7.28844	5.02479	4.18414	4.86784	4.58474	5.59756	5.39912	5.40945	5.31301	4.68703	3.99727	5.90167	5.02184	6.37705	4.41742	5.71982	5.37899	7.42488	5.61008	4.32669	5.68581	4.20274	6.52435	6.97314	4.33768	6.3087	3.60713	5.95526	5.1777	5.76875	4.71751	5.26809	5.09768
	-0.0134349	7.44165	6.53106	8.48695	5.70577	8.18384	8.07772	6.50868	7.43575	8.30748	7.7376		-0.0134349	5.35122	4.31894	5.79987	7.28378	5.01738	4.1469	4.97355	4.56691	5.53503	5.27229	5.45654	5.26131	4.71202	3.9976	5.94411	5.01609	6.46924	4.37765	5.69686	5.41647	7.54221	5.64362	4.40995	5.61526	4.26464	6.56718	6.93444	4.39396	6.30397	3.65025	6.05182	5.10975	5.7163	4.67033	5.18365	5.22878
	-0.00319489	7.50667	6.55365	8.57364	5.85204	8.20389	8.13221	6.62704	7.48242	8.37677	7.75842		-0.00319489	5.36521	4.3574	5.79704	7.26915	5.03259	4.08288	4.94733	4.59545	5.47998	5.20847	5.49653	5.27511	4.74361	3.96681	5.93185	5.00917	6.60293	4.32757	5.78242	5.39264	7.57673	5.59974	4.46428	5.61441	4.26601	6.62221	6.95821	4.55447	6.35719	3.67067	6.15782	4.99422	5.63322	4.5728	5.22704	5.16014
	0.00704514	7.46406	6.44923	8.55941	5.82696	8.14618	8.11663	6.53896	7.45932	8.33392	7.7459		0.00704514	5.36926	4.35071	5.77252	7.19924	5.09245	4.19806	4.95355	4.6495	5.50655	5.18527	5.57217	5.16292	4.74236	3.95602	5.97639	4.93727	6.63904	4.35376	5.84036	5.37852	7.58058	5.55101	4.51003	5.57721	4.39772	6.63359	7.00165	4.51915	6.39707	3.69644	6.21999	4.95444	5.59206	4.52849	5.34191	5.16455
	0.0172852	7.37489	6.45716	8.45554	5.76064	8.10844	8.07561	6.4791	7.21777	8.16748	7.65227		0.0172852	5.36744	4.39229	5.81881	7.19992	5.13332	4.16936	4.97224	4.68733	5.6539	5.17762	5.66666	5.08744	4.71462	4.03023	5.98588	4.9701	6.53231	4.30565	5.85913	5.28473	7.54733	5.5053	4.54203	5.52757	4.42802	6.60247	6.9642	4.41718	6.43373	3.71982	6.20153	4.91545	5.62174	4.63783	5.38237	5.11389
	0.0275252	7.28676	6.42533	8.33356	5.58481	7.99731	7.99765	6.42913	7.13605	8.09307	7.5839		0.0275252	5.34304	4.35535	5.8437	7.15121	5.11889	4.08411	4.95721	4.69469	5.67554	5.19498	5.53872	5.06684	4.71534	3.85127	5.91653	4.95725	6.4106	4.22197	5.82413	5.2614	7.58791	5.47718	4.51198	5.44895	4.38184	6.5813	6.95193	4.39513	6.39545	3.73514	6.13185	4.94169	5.67641	4.73229	5.24236	5.03824
	0.0377652	7.25124	6.37767	8.20614	5.41874	8.0003	7.98183	6.37668	7.16759	8.09957	7.63265		0.0377652	5.30376	4.28772	5.79455	7.14282	5.02185	4.05753	4.89341	4.59016	5.58894	5.15554	5.53011	5.05755	4.66688	3.7206	5.87693	4.94011	6.32352	4.09429	5.83776	5.26928	7.55924	5.44796	4.43238	5.47466	4.33642	6.54494	6.91881	4.36479	6.32545	3.7468	6.18578	4.93645	5.60255	4.73314	5.14889	4.98407
	0.0480052	7.20872	6.42059	8.12201	5.35677	7.88665	7.93391	6.44521	7.17411	7.96767	7.57153		0.0480052	5.25469	4.25893	5.72971	7.06491	4.96882	4.08317	4.82283	4.5475	5.40543	5.16319	5.56765	5.13523	4.67631	3.67574	5.86518	4.78926	6.36539	3.98182	5.81353	5.27797	7.52586	5.4438	4.3228	5.45959	4.34369	6.4631	6.85644	4.31089	6.18662	3.711	6.05552	4.94308	5.63531	4.62823	5.05853	4.98806
	0.0582453	7.13887	6.38605	8.09349	5.3586	7.77923	7.84354	6.36486	7.13068	7.79945	7.49392		0.0582453	5.19303	4.23205	5.66055	6.94474	4.87085	4.11441	4.69131	4.49767	5.25248	5.16582	5.44312	5.1189	4.65102	3.6519	5.76493	4.74087	6.35352	3.9021	5.77198	5.1505	7.46619	5.38811	4.18941	5.38195	4.34401	6.39745	6.6503	4.25794	6.13723	3.62064	5.85965	4.95025	5.56738	4.56594	4.97856	4.94999
	0.0684853	7.04645	6.25761	8.01592	5.3129	7.7178	7.72684	6.17184	7.10868	7.63109	7.47541		0.0684853	5.13797	4.23298	5.56526	6.87047	4.74122	4.09608	4.53422	4.42311	5.07518	5.08419	5.30858	5.18439	4.64128	3.7292	5.5591	5.10852	6.31324	3.85413	5.72369	5.12193	7.42701	5.34727	4.20797	5.29021	4.22729	6.27119	6.59117	4.16507	6.22387	3.62253	5.68637	5.0269	5.4454	4.59937	4.94184	4.9364
	0.0787253	6.95801	6.18163	7.86169	5.29741	7.67921	7.61099	6.07295	7.03395	7.46289	7.42138		0.0787253	5.07767	4.20438	5.41573	6.78225	4.77945	4.06027	4.41333	4.3757	4.84817	5.04562	5.17032	5.24817	4.60346	3.7784	5.45986	5.33378	6.23646	3.84926	5.58454	5.13029	7.28489	5.28159	4.26946	5.20964	4.18284	6.1806	6.53276	4.05396	6.23233	3.52132	5.64814	5.0679	5.4111	4.52677	4.86207	4.8503
	0.0889653	6.87643	6.16402	7.76637	5.21976	7.5924	7.46738	6.06674	6.90176	7.33622	7.37321		0.0889653	5.01388	4.1394	5.32779	6.73135	4.80553	3.9909	4.22079	4.28036	4.69812	5.07241	5.10572	5.12983	4.5828	3.73457	5.35981	5.23539	6.14137	3.7089	5.60157	5.13387	7.17261	5.21723	4.33179	5.14081	4.20165	6.09605	6.45073	4.00486	6.10802	3.42662	5.57318	5.13398	5.36916	4.44928	4.80964	4.86951
	0.0992054	6.79238	6.12793	7.65591	5.22394	7.46031	7.34317	5.9994	6.81618	7.27162	7.23296		0.0992054	4.93234	3.99545	5.20935	6.62869	4.68179	3.83619	4.08262	4.2127	4.69328	5.07449	4.99408	4.99736	4.53391	3.62246	5.36261	5.01937	6.10461	3.56676	5.63402	5.13644	7.07222	5.05909	4.28387	5.0075	4.23973	5.91061	6.43612	3.83422	6.04458	3.36588	5.4473	5.14717	5.37012	4.38415	4.76387	4.83801
	0.109445	6.69132	6.02711	7.58939	5.23919	7.34389	7.23897	5.96276	6.72554	7.11364	6.9814		0.109445	4.84822	3.93585	5.08463	6.53377	4.68346	3.74627	4.00224	4.17334	4.64097	5.08736	4.80839	4.85903	4.4445	3.41907	5.36994	4.77124	6.02557	3.43114	5.57582	5.06326	6.81188	4.82289	4.1419	4.80175	4.2267	5.66039	6.39582	3.83613	5.90497	3.30219	5.4133	5.08219	5.21522	4.35107	4.77819	4.81643
	0.119685	6.59163	5.91537	7.40559	5.21117	7.19778	7.21668	5.92571	6.61971	6.94095	6.89169		0.119685	4.78006	4.00232	4.92412	6.46123	4.67847	3.76398	3.99445	4.19664	4.52727	5.0864	4.69543	4.82354	4.47758	3.38407	5.40818	4.45172	5.91512	3.27375	5.48539	4.98096	6.59743	4.84799	3.97606	4.60417	4.15046	5.541	6.35434	3.86897	5.7799	3.32005	5.32688	4.9446	5.10625	4.27856	4.76144	4.77023
	0.129925	6.49502	5.69424	7.20146	5.24037	7.03522	7.24606	5.90184	6.48397	6.70859	6.94341		0.129925	4.7086	3.95827	4.80989	6.38083	4.54103	3.75478	3.93283	4.22017	4.51917	5.09665	4.57509	4.75694	4.43988	3.30653	5.33333	4.27579	5.80914	3.26388	5.43418	5.00789	6.45466	4.72445	3.86431	4.46731	4.10887	5.46576	6.34695	3.72745	5.73652	3.246	5.2739	4.99973	5.0089	4.2192	4.79598	4.69434
	0.140165	6.38559	5.50355	7.04974	5.18879	6.9319	7.14666	5.85192	6.40194	6.46957	6.92623		0.140165	4.61745	3.82529	4.65014	6.27514	4.51524	3.71857	3.81865	4.24761	4.37086	5.02843	4.36713	4.63283	4.44838	3.13981	5.17473	4.11123	5.808	3.33207	5.32413	4.98439	6.3911	4.56651	3.6823	4.30133	3.99949	5.3254	6.16262	3.53164	5.74187	3.13861	5.18756	5.04164	4.91612	4.1006	4.80671	4.6522
	0.150406	6.28622	5.39608	6.85626	5.12992	6.97868	7.00674	5.59733	6.3404	6.39682	6.87371		0.150406	4.5206	3.72695	4.50072	6.02682	4.50771	3.69542	3.75883	4.16697	4.18397	5.03707	4.19366	4.52295	4.38993	3.0455	5.10872	3.97266	5.632	3.3394	5.13792	4.86789	6.30541	4.50079	3.56754	4.23405	3.99969	5.18377	6.03347	3.46536	5.64544	2.94313	5.10989	5.01279	4.79667	3.92825	4.68795	4.55222
	0.160646	6.17308	5.3404	6.72248	4.94791	6.87836	6.90787	5.43521	6.08926	6.31868	6.91755		0.160646	4.42367	3.59636	4.41823	5.83607	4.52135	3.60172	3.55369	4.096	4.04133	5.0717	4.17994	4.38608	4.31385	2.90755	5.05149	3.8329	5.41654	3.2866	5.12302	4.83484	6.2266	4.33207	3.52733	4.13498	3.94747	5.02547	5.91143	3.37317	5.46031	2.74055	4.97464	5.00319	4.68148	3.85733	4.57804	4.34202
	0.170886	6.06992	5.28596	6.52488	4.9147	6.7747	6.7869	5.26129	5.83464	6.22163	7.02454		0.170886	4.31354	3.50666	4.29636	5.6483	4.51081	3.54469	3.36007	3.99773	3.89493	5.05413	4.20425	4.24142	4.2177	2.7909	5.03608	3.73993	5.29783	3.17106	5.05216	4.72812	6.00095	4.15229	3.43513	4.05025	3.99728	4.93962	5.75119	3.17428	5.35616	2.62902	4.82898	4.98778	4.48055	3.782	4.48064	4.16508
	0.181126	5.93679	5.23674	6.37484	4.76984	6.6553	6.6281	5.2056	5.67317	5.98863	6.89888		0.181126	4.20946	3.46729	4.08968	5.37996	4.45535	3.49784	3.27131	3.91241	3.80775	5.02958	4.14251	4.10135	4.19595	2.69043	4.98085	3.68471	5.14089	3.03527	4.92661	4.57433	5.77693	4.0554	3.41279	3.79529	4.07878	4.83462	5.5239	2.97674	5.33848	2.54349	4.66477	5.01067	4.30756	3.72274	4.49046	4.03266
	0.191366	5.81709	5.24654	6.22142	4.61385	6.40826	6.49819	5.19239	5.52219	5.78901	6.86196		0.191366	4.11307	3.34126	3.90525	5.24484	4.42689	3.42077	3.17123	3.82669	3.66453	5.07134	4.04034	3.96546	4.13354	2.70884	4.79784	3.59048	5.11665	2.88126	4.85003	4.51363	5.61453	3.97713	3.32307	3.61652	4.14445	4.70144	5.39709	2.8806	5.41211	2.42023	4.52558	4.96268	4.34438	3.65076	4.40021	3.87246
	0.201606	5.68036	5.20626	6.12212	4.40181	6.22031	6.41664	5.0587	5.34343	5.68628	6.66767		0.201606	4.01292	3.27194	3.77547	5.13665	4.35852	3.34142	2.96741	3.66433	3.48867	5.09383	3.83483	3.75349	4.10632	2.71175	4.59566	3.50465	5.01844	2.79749	4.68178	4.51257	5.36646	3.91167	3.25644	3.48288	4.18315	4.5105	5.35076	2.82693	5.38408	2.37645	4.47394	4.8339	4.18849	3.61451	4.27618	3.76008
	0.211846	5.54606	5.1242	6.03502	4.2318	6.08723	6.18576	4.94625	5.19863	5.61765	6.48799		0.211846	3.90743	3.24395	3.59955	5.06374	4.31402	3.22789	2.8069	3.56281	3.37962	4.99712	3.65152	3.59721	4.10422	2.68039	4.48713	3.48003	4.96581	2.68819	4.46496	4.36073	5.08101	3.87061	3.18462	3.4337	4.15847	4.31845	5.3038	2.81488	5.32025	2.36103	4.2843	4.74303	4.10944	3.60775	4.27509	3.7224
	0.222086	5.3821	5.11124	5.90443	3.94868	5.90938	6.00652	4.90722	5.04877	5.39627	6.20641		0.222086	3.80795	3.24581	3.40307	4.93221	4.25785	3.17623	2.72923	3.38957	3.20911	4.92337	3.47372	3.40931	4.07754	2.64606	4.37025	3.46221	4.79926	2.54652	4.28653	4.23179	4.91014	3.68394	3.05505	3.35748	4.20412	4.17571	5.30307	2.74064	5.13754	2.25455	3.99265	4.66843	3.98699	3.56323	4.22105	3.59731
	0.232326	5.24142	5.04321	5.78203	3.7922	5.75728	5.88589	4.82401	4.91045	5.21281	5.9649		0.232326	3.7156	3.19989	3.27494	4.66628	4.3102	3.13729	2.63652	3.31426	3.07076	4.84251	3.37174	3.31111	3.95664	2.65356	4.14933	3.37257	4.61922	2.51882	4.2438	4.21882	4.64771	3.40803	2.97783	3.1408	4.2491	3.95168	5.35324	2.65519	4.98159	2.18391	3.81238	4.53276	3.867	3.45895	4.21711	3.44965
	0.242566	5.10529	5.05477	5.66922	3.79556	5.55836	5.6919	4.62723	4.78673	4.97803	5.78579		0.242566	3.61644	3.11265	3.19474	4.40804	4.29644	3.039	2.56922	3.22556	2.90264	4.80296	3.21169	3.14663	3.85629	2.55572	4.04184	3.36015	4.4781	2.51882	4.18664	4.18863	4.48387	3.27856	2.9421	3.05886	4.28361	3.74091	5.26515	2.51428	4.83153	2.0503	3.74445	4.52677	3.80804	3.39624	4.00857	3.30366
	0.252806	4.93463	4.97047	5.44999	3.76501	5.26329	5.47712	4.47356	4.64463	4.72644	5.64117		0.252806	3.52094	3.01869	3.12528	4.17867	4.3069	2.9309	2.48559	3.20581	2.79596	4.70396	3.13666	3.00935	3.86395	2.44104	3.86701	3.31361	4.25059	2.47915	4.14846	4.0886	4.38668	3.25365	2.91723	2.93199	4.24163	3.58221	5.14178	2.43238	4.71902	1.90359	3.69024	4.5602	3.65857	3.40586	3.84595	3.23918
	0.263046	4.78685	4.80088	5.2629	3.70121	4.99047	5.36673	4.39046	4.46375	4.59272	5.51251		0.263046	3.42084	3.01392	3.00247	4.09006	4.29087	2.87335	2.3946	3.21218	2.69822	4.60686	3.08386	2.86367	3.91773	2.32267	3.77368	3.26761	4.03352	2.32473	4.0516	4.00957	4.20338	3.17789	2.83054	2.91555	4.23293	3.52144	4.89327	2.37787	4.54054	1.78242	3.56624	4.60603	3.49536	3.26211	3.64678	3.19945
	0.273286	4.64311	4.6778	5.18702	3.57414	4.8232	5.14523	4.17969	4.31286	4.3942	5.49383		0.273286	3.3153	2.88634	2.77475	3.8782	4.2545	2.81424	2.28246	3.07802	2.62759	4.61545	2.98175	2.73162	3.99657	2.2928	3.65812	3.21243	3.82918	2.23707	4.01658	3.89265	4.02608	3.03656	2.71312	2.82558	4.25449	3.31724	4.67687	2.36821	4.3098	1.62645	3.35271	4.51556	3.28845	3.08521	3.51846	3.11746
	0.283526	4.50368	4.53862	5.02514	3.58612	4.66245	4.86885	4.00965	4.16902	4.3343	5.33893		0.283526	3.22094	2.68869	2.63468	3.62172	4.22882	2.88663	2.15181	2.92245	2.48319	4.63248	2.89049	2.63297	3.90519	2.1443	3.61979	3.16894	3.72259	2.18934	3.92492	3.83335	3.84449	2.84981	2.54721	2.86401	4.24447	3.26646	4.5521	2.25272	4.10612	1.53901	3.2438	4.3752	3.1027	2.97597	3.38425	3.01533
	0.293766	4.34127	4.44068	4.86927	3.46086	4.48906	4.67027	3.84773	3.97684	4.17839	5.13832		0.293766	3.11629	2.59679	2.53493	3.21426	4.07111	2.8372	1.98791	3.19193	2.29932	4.58874	2.76394	2.52339	3.85914	1.99784	3.47726	3.14796	3.57726	2.02478	3.71973	3.87426	3.57005	2.69225	2.341	2.79768	4.27834	3.17595	4.50865	2.24081	4.02246	1.56772	3.17899	4.24672	3.01321	2.88613	3.22148	2.92308
	0.304006	4.22951	4.38531	4.8672	3.38548	4.2482	4.63005	3.70541	3.81197	4.03125	5.00076		0.304006	3.01536	2.60674	2.42725	2.99892	3.90294	2.77437	1.86968	3.3103	2.20163	4.49818	2.56438	2.31345	3.78401	1.92577	3.34761	3.10566	3.41787	1.92924	3.57513	3.83741	3.37138	2.52452	2.13392	2.73965	4.29664	3.0471	4.54945	2.14159	3.88766	1.46262	3.09948	4.13226	2.94291	2.74229	3.13878	2.85825
	0.314246	4.1195	4.29184	4.77235	3.34275	4.11784	4.57133	3.60281	3.66066	3.7904	4.92549		0.314246	2.919	2.54762	2.25499	2.79533	3.74296	2.82326	1.85291	3.13307	2.02213	4.42484	2.44389	2.08385	3.7805	1.9112	3.21573	3.11132	3.29511	1.8517	3.46794	3.86543	3.14567	2.45016	2.06165	2.69199	4.31354	2.94751	4.43171	2.04891	3.77811	1.40088	3.01683	3.98655	2.82276	2.63229	3.10943	2.74986
	0.324486	4.01449	4.21736	4.78227	3.2478	3.90756	4.49276	3.47614	3.59702	3.6688	4.74067		0.324486	2.83379	2.27839	2.1691	2.71299	3.67762	2.69591	1.85165	2.89312	1.91652	4.38832	2.33388	2.05471	3.74385	1.7954	3.05231	3.07391	3.22792	1.72295	3.46847	3.83182	2.96985	2.41826	2.07271	2.77251	4.26232	2.9395	4.35716	1.84061	3.72032	1.31459	2.9601	3.92448	2.68436	2.57614	3.0267	2.6268
	0.334726	3.88452	4.06204	4.72726	3.2072	3.68093	4.3658	3.376	3.45646	3.51682	4.56817		0.334726	2.7411	2.23212	2.02456	2.62062	3.64943	2.54721	1.79082	2.62015	1.88264	4.27888	2.23684	1.97761	3.5506	1.68556	2.88618	3.09605	3.16243	1.55977	3.43193	3.79924	2.79098	2.29497	2.04177	2.80729	4.10077	2.93881	4.20281	1.56905	3.70876	1.29806	2.87828	3.85368	2.51634	2.55339	2.96456	2.50888
	0.344966	3.79547	3.94728	4.63057	3.17018	3.59137	4.2128	3.43109	3.31838	3.4239	4.43369		0.344966	2.65348	2.17645	1.96799	2.3786	3.63485	2.52176	1.7275	2.43928	1.8696	4.1848	2.18367	1.89213	3.40091	1.69328	2.78024	3.15351	3.08433	1.40018	3.37522	3.70099	2.51752	2.19287	2.02908	2.78236	3.9705	2.89191	4.16071	1.46967	3.58152	1.24944	2.75857	3.82281	2.48806	2.54131	2.8464	2.47242
	0.355206	3.69102	3.93891	4.48068	3.11	3.48777	4.0098	3.38977	3.19606	3.32436	4.28183		0.355206	2.57614	2.0948	1.82885	2.17842	3.70833	2.61232	1.64974	2.20072	1.82819	4.19264	2.10458	1.84461	3.35536	1.59531	2.77061	3.077	3.00039	1.3276	3.31117	3.57032	2.35547	2.03649	1.96884	2.85708	3.91595	2.85329	4.13229	1.42942	3.55671	1.17704	2.70955	3.66962	2.28535	2.54385	2.75178	2.50969
	0.365446	3.54631	3.93783	4.4138	2.94285	3.29754	3.79714	3.23444	3.02211	3.17998	4.09109		0.365446	2.49356	1.97685	1.72153	2.01495	3.6669	2.66492	1.5598	2.10247	1.73911	4.15174	2.05817	1.82106	3.30466	1.48717	2.714	2.93822	2.90325	1.2193	3.16759	3.56462	2.18938	1.85652	1.8989	2.91313	3.87882	2.75078	4.03815	1.35284	3.42292	1.15754	2.5602	3.91719	2.19622	2.57898	2.59037	2.58705
	0.375686	3.4031	3.9668	4.25756	2.83007	3.17483	3.59766	3.01895	2.8243	2.97936	3.97838		0.375686	2.40764	1.86243	1.64184	1.88565	3.55098	2.56452	1.5074	2.10184	1.59041	4.17094	1.99277	1.75943	3.27203	1.33096	2.56225	2.78156	2.61889	1.13303	3.15248	3.43907	2.06041	1.63961	1.71799	3.01525	3.81335	2.71224	3.92152	1.26094	3.25994	1.07931	2.46336	4.1357	2.05612	2.55764	2.44038	2.7154
	0.385926	3.21581	3.86118	4.04076	2.73046	2.98603	3.41846	2.81545	2.62573	2.69135	3.77285		0.385926	2.3312	1.78632	1.59101	1.74829	3.49791	2.49114	1.52694	2.07066	1.61336	4.09597	1.96719	1.70396	3.18158	1.21919	2.45054	2.68316	2.35142	1.05529	3.08735	3.41096	1.92318	1.56231	1.49404	3.05557	3.72598	2.66029	3.89056	1.14359	3.08485	0.982872	2.43917	4.02514	2.05455	2.52638	2.37814	2.71263
	0.396166	3.11097	3.83163	3.86912	2.65974	2.92251	3.38553	2.72324	2.5062	2.47364	3.6271		0.396166	2.25427	1.71424	1.42899	1.61652	3.39508	2.43634	1.4321	1.96705	1.74636	4.03522	1.89857	1.61819	3.15096	1.23179	2.38507	2.56376	2.15858	0.92664	2.99788	3.41456	1.72036	1.51552	1.37246	3.03764	3.62322	2.59313	3.78032	1.11549	2.87661	1.03054	2.43707	3.81902	1.87278	2.40869	2.29498	2.64482
	0.406406	2.98831	3.70687	3.73133	2.5657	2.85187	3.28466	2.55502	2.41317	2.33325	3.45292		0.406406	2.16575	1.76992	1.25889	1.32097	3.28335	2.42398	1.46203	1.80671	1.79631	3.95776	1.76999	1.52621	3.12655	1.24195	2.30378	2.50479	2.06237	0.845711	2.89268	3.33177	1.51123	1.41381	1.30432	3.06404	3.51152	2.46616	3.68511	1.06565	2.63414	0.949741	2.45512	3.59192	1.66735	2.28159	2.23183	2.603
	0.416646	2.84503	3.57357	3.5578	2.53799	2.63047	3.17106	2.38762	2.29348	2.17212	3.28112		0.416646	2.08165	1.81677	1.21419	1.12829	3.15072	2.41232	1.39371	1.62995	1.82825	3.84283	1.74544	1.47951	3.06332	1.21283	2.24928	2.33588	1.97196	0.820328	2.72049	3.25209	1.40881	1.24149	1.26289	3.14201	3.47102	2.33834	3.63552	1.05982	2.52545	0.843803	2.39222	3.3341	1.50749	2.222	2.14668	2.54594
	0.426886	2.70468	3.5105	3.43281	2.48673	2.51874	3.03792	2.14157	2.08115	2.044	3.0887		0.426886	2.01073	1.83499	1.14359	1.0078	3.04932	2.37474	1.38982	1.64468	1.82072	3.74397	1.69609	1.37475	2.93918	1.19526	2.14204	2.24361	1.75779	0.74052	2.56367	3.22265	1.22286	1.23555	1.21233	3.20627	3.36649	2.28532	3.60094	1.12281	2.42311	0.80476	2.25629	3.0698	1.37455	2.14192	2.15174	2.56506
	0.437126	2.57355	3.40571	3.37187	2.40329	2.4531	2.90102	2.04114	1.90009	1.92464	2.76105		0.437126	1.93821	1.78502	1.09377	0.912395	2.92423	2.32253	1.39635	1.66734	1.81825	3.67708	1.63505	1.26434	2.79408	1.10975	2.06799	2.07629	1.68431	0.745262	2.4755	3.18765	1.10044	1.06443	1.08885	3.2284	3.22596	2.28436	3.56323	1.08252	2.41999	0.746277	2.13493	2.90715	1.18147	2.09093	2.03756	2.5233
	0.447366	2.4438	3.3102	3.25979	2.29988	2.4371	2.72771	1.88941	1.76564	1.716	2.58846		0.447366	1.87288	1.68127	1.02623	0.92794	2.79963	2.26201	1.36714	1.57503	1.74203	3.55487	1.47852	1.27113	2.68878	1.06727	1.86223	1.97598	1.50468	0.675766	2.47835	3.07542	0.952068	0.89753	1.04505	3.2628	3.16028	2.27153	3.51686	1.1349	2.38971	0.635696	2.05335	2.88627	1.07238	1.93035	1.94183	2.5192
	0.457606	2.33902	3.18004	3.1656	2.28006	2.30991	2.67934	1.82599	1.56831	1.55277	2.48915		0.457606	1.80482	1.59099	0.880791	0.878738	2.77667	2.19685	1.37835	1.46135	1.67959	3.50824	1.31517	1.27517	2.61976	0.959518	1.63767	1.96779	1.44408	0.589111	2.42584	2.95012	0.776123	0.702812	1.00784	3.27985	3.0317	2.17509	3.40209	1.08721	2.40622	0.521374	2.05635	2.86946	0.944557	1.79167	1.86099	2.50763
	0.467846	2.2043	3.02609	2.96527	2.24243	2.23756	2.53222	1.74408	1.31966	1.38083	2.39061		0.467846	1.74344	1.65088	0.717258	0.853634	2.70758	2.14027	1.39639	1.22554	1.61516	3.46465	1.25515	1.28927	2.50985	0.859371	1.61304	2.08015	1.33279	0.535011	2.36661	2.87294	0.618141	0.59407	0.963058	3.27493	2.89169	2.08402	3.25689	1.04078	2.26808	0.58271	2.12907	2.66988	0.881863	1.65121	1.77898	2.51543
	0.478086	2.11906	2.84182	2.94938	2.17752	2.10572	2.38825	1.6232	1.36755	1.36135	2.25676		0.478086	1.68039	1.57532	0.657345	0.760582	2.67546	2.08484	1.30277	1.04034	1.57789	3.47967	1.26115	1.23638	2.40382	0.80426	1.50549	2.11967	1.26955	0.468342	2.204	2.86725	0.552456	0.594616	0.953007	3.28987	2.8302	1.95059	3.2485	0.995865	2.15364	0.595497	2.14857	2.61393	0.779106	1.55666	1.75227	2.49516
	0.488326	2.04261	2.76731	2.72431	2.17636	1.97054	2.2369	1.58728	1.41013	1.31452	2.19612		0.488326	1.61556	1.5356	0.617767	0.581123	2.70407	2.08208	1.23936	0.896732	1.63349	3.43341	1.35926	1.1287	2.2159	0.732635	1.42845	1.95421	1.20014	0.427048	1.94997	2.85735	0.525597	0.452965	0.890152	3.25686	2.76546	1.87898	3.09262	0.933338	2.03319	0.635807	2.06069	2.59099	0.661652	1.43465	1.67336	2.50557
	0.498566	1.94278	2.71132	2.56803	2.23069	1.91779	2.08063	1.4118	1.32212	1.18333	2.05934		0.498566	1.54824	1.51746	0.550072	0.420906	2.62943	2.10299	1.21466	0.728035	1.64895	3.3756	1.37958	1.03977	2.11376	0.672451	1.30042	1.82834	1.11956	0.254776	1.70982	2.83956	0.481247	0.383545	0.76572	3.25193	2.61514	1.84393	2.93772	0.928688	1.96538	0.619095	2.06886	2.53121	0.529385	1.3243	1.56299	2.55479
	0.508806	1.81926	2.60483	2.37143	2.22517	1.78395	1.91452	1.3149	1.20317	1.04879	1.90661		0.508806	1.48003	1.44118	0.353161	0.301552	2.4802	2.15642	1.17773	0.660221	1.66909	3.3435	1.32332	0.978317	2.09932	0.604393	1.21415	1.70293	1.05312	0.104492	1.55609	2.80458	0.287319	0.194469	0.622108	3.1635	2.45521	1.76977	2.88499	0.908401	1.84332	0.669456	2.13992	2.41308	0.369286	1.25891	1.48577	2.54459
	0.519046	1.68709	2.47128	2.25943	2.07492	1.70994	1.77229	1.13885	1.02807	0.944794	1.78425		0.519046	1.4154	1.37217	0.276497	0.316208	2.43795	2.06511	1.22232	0.580719	1.7692	3.31601	1.21944	0.782482	2.12986	0.524544	1.17149	1.57485	0.920238	0.00938416	1.37484	2.64094	0.0814133	0.0597229	0.640869	3.21026	2.3349	1.68073	2.75928	1.00608	1.75461	0.620022	2.20649	2.33164	0.320938	1.13423	1.35023	2.49285
	0.529287	1.58079	2.33612	2.2038	2.00632	1.67752	1.65507	0.982094	0.905205	0.850616	1.61034		0.529287	1.36541	1.32315	0.211693	0.392429	2.43439	2.02126	1.24845	0.495663	1.79388	3.17461	1.11744	0.694218	2.10494	0.608864	1.21488	1.44607	0.804401	-0.0792007	1.20935	2.48742	-0.0323143	-0.018692	0.649277	3.26895	2.22067	1.67535	2.7207	1.09078	1.75478	0.529305	2.21228	2.28707	0.299683	0.930061	1.26649	2.30507
	0.539527	1.46519	2.2012	2.12734	1.8767	1.59627	1.56593	0.921967	0.792801	0.771904	1.33261		0.539527	1.32426	1.21915	0.100746	0.303284	2.37138	1.97277	1.22733	0.419132	1.78759	3.00478	1.10576	0.729027	2.07153	0.634361	1.29821	1.41434	0.703171	-0.17379	1.1585	2.32784	-0.114925	-0.104103	0.662281	3.25964	2.27723	1.61312	2.68739	1.21354	1.81332	0.528217	2.20037	2.19878	0.240936	0.813023	1.1893	2.34814
	0.549767	1.36216	2.09267	2.02023	1.75814	1.4055	1.43759	0.922356	0.74519	0.704815	1.17295		0.549767	1.27927	1.13989	0.0515862	0.255608	2.33345	1.88203	1.1545	0.408283	1.78577	2.90238	1.07587	0.712101	1.89712	0.601807	1.17867	1.28717	0.555481	-0.175858	1.11541	2.19926	-0.27636	-0.177654	0.71397	3.1557	2.29075	1.64487	2.66189	1.26088	1.82882	0.551643	2.13928	2.17184	0.127117	0.755875	1.23556	2.44843
	0.560007	1.27528	2.0451	1.82914	1.70121	1.31713	1.31771	0.900398	0.66922	0.604546	1.09303		0.560007	1.22685	1.20516	0.0465088	0.198643	2.21516	1.82722	1.09772	0.43552	1.76954	2.79998	0.981285	0.698723	1.80785	0.580742	1.0232	1.20327	0.465752	-0.104507	1.08559	2.11363	-0.39072	-0.266335	0.774025	3.04893	2.23167	1.56023	2.36198	1.1469	1.72596	0.617622	2.06232	2.14447	0.0852127	0.592796	1.21762	2.58634
	0.570247	1.2176	1.96465	1.74652	1.66919	1.28558	1.18298	0.87484	0.556934	0.561989	1.11572		0.570247	1.18416	1.24438	0.0165482	0.238705	2.23827	1.80628	0.994446	0.301147	1.65343	2.76321	0.919785	0.811317	1.68908	0.71434	0.931026	1.18567	0.385944	-0.0394592	1.05493	2.04239	-0.437721	-0.286461	0.856224	3.03037	2.12244	1.56695	1.82004	1.09406	1.72262	0.54044	2.02753	2.12997	0.141636	0.44302	1.25909	2.51827
	0.580487	1.14776	1.80874	1.59381	1.57132	1.26363	1.16116	0.75568	0.59433	0.459625	1.12158		0.580487	1.14436	1.23129	-0.075531	0.230003	2.08981	1.78802	0.864174	0.116436	1.63655	2.73832	0.891273	0.882317	1.58869	0.651375	0.883938	1.25871	0.334621	-0.103577	0.984802	1.92477	-0.539146	-0.334309	0.952271	3.08489	2.03884	1.51254	1.70169	1.02742	1.60122	0.448204	2.06833	2.05886	0.0542412	0.347366	1.39904	2.37191
	0.590727	1.03958	1.69849	1.43256	1.49845	1.16922	1.06749	0.574162	0.581108	0.293121	1.04164		0.590727	1.1092	1.10547	-0.28944	0.180077	1.99046	1.70493	0.794235	0.0594063	1.55144	2.7673	0.793221	0.880886	1.45225	0.658203	0.916832	1.23994	0.271858	-0.0764351	0.938957	1.81848	-0.630482	-0.33865	0.980106	3.17307	1.95942	1.4543	1.80782	1.01204	1.50875	0.511456	2.02557	1.98923	-0.00525284	0.306152	1.55031	2.30737
	0.600967	0.948253	1.62547	1.35145	1.35283	1.10443	0.969349	0.43758	0.544464	0.211216	0.937489		0.600967	1.07186	1.0755	-0.376842	0.192348	1.86388	1.66084	0.72086	-0.0422554	1.46594	2.56914	0.668217	0.826778	1.41896	0.690224	0.933758	1.08034	0.107075	-0.099884	0.711552	1.79229	-0.730061	-0.35627	0.943081	3.15608	1.9053	1.36897	1.94769	1.07584	1.43475	0.621311	1.94731	1.94042	-0.0282059	0.326267	1.52325	2.26405
	0.611207	0.880739	1.54109	1.20608	1.29772	1.13399	0.886429	0.300491	0.484478	0.210289	0.866081		0.611207	1.04508	1.11506	-0.422749	0.166	1.70694	1.6805	0.78001	-0.0570755	1.45219	2.37669	0.602402	0.821304	1.474	0.682785	1.08642	0.923149	0.0191116	-0.0270691	0.576202	1.72865	-0.771641	-0.400448	0.814739	3.16837	1.85754	1.40447	1.9931	1.021	1.33858	0.678173	1.8811	1.86594	-0.0485764	0.338451	1.37934	2.22857
	0.621447	0.830123	1.46444	1.07941	1.25441	1.11451	0.938618	0.295246	0.448826	0.0881805	0.78746		0.621447	1.02127	1.19977	-0.399193	0.147343	1.69475	1.72437	0.680496	-0.160385	1.42054	2.4653	0.599972	0.823845	1.38323	0.863235	1.13398	0.811913	-0.0460243	-0.020752	0.420666	1.52656	-0.899609	-0.395401	0.753014	3.20708	1.80497	1.50527	2.02604	0.980713	1.21915	0.602882	1.83813	1.77684	-0.064167	0.35006	1.26573	2.23246
	0.631687	0.74097	1.47918	0.929882	1.11004	1.02023	0.927952	0.11338	0.34845	0.098217	0.641396		0.631687	0.986836	1.18871	-0.459194	0.144829	1.64828	1.72962	0.546303	-0.205406	1.34885	2.50838	0.519363	0.788036	1.32489	0.982849	1.0674	0.747253	-0.050209	-0.0475159	0.287144	1.27234	-1.05944	-0.359425	0.737263	3.16053	1.75204	1.5291	1.92826	1.03554	1.19035	0.622551	1.72552	1.70864	-0.150188	0.392605	1.20107	2.23117
	0.641927	0.629021	1.41516	0.787605	0.899826	0.881317	0.93845	0.0171928	0.234131	0.0971832	0.390327		0.641927	0.956732	1.28659	-0.541065	0.126888	1.55919	1.71115	0.464859	-0.305367	1.27158	2.48783	0.534943	0.776234	1.29435	0.98814	1.06569	0.682953	-0.0721207	-0.0993233	0.228493	1.13483	-1.1603	-0.374733	0.817959	3.14056	1.63981	1.53705	1.80423	1.03717	1.14117	0.616112	1.63671	1.69949	-0.269516	0.296452	1.24619	2.25492
	0.652167	0.504876	1.21685	0.629295	0.775028	0.749432	0.888168	-0.0862961	0.0832596	0.0505333	0.237617		0.652167	0.926187	1.38742	-0.729355	0.0730209	1.52509	1.78656	0.524952	-0.436115	1.22346	2.45744	0.424721	0.746265	1.23239	0.997536	1.08323	0.61306	-0.151093	-0.105999	0.244476	1.01985	-1.1647	-0.40823	0.905289	3.14806	1.54185	1.37405	1.74903	0.904648	1.13101	0.595703	1.6334	1.65848	-0.294876	0.186825	1.1688	2.27802
	0.662407	0.385707	0.98698	0.557999	0.737892	0.641968	0.701286	-0.105942	-0.152527	0.0135307	0.0901794		0.662407	0.893925	1.36108	-0.817848	0.0829124	1.40866	1.86052	0.439095	-0.471363	1.21595	2.48381	0.290432	0.763393	1.10982	1.08607	1.04363	0.579357	-0.217152	-0.192474	0.124302	0.945442	-1.20252	-0.514755	1.02233	3.04302	1.43502	1.30499	1.70259	0.864151	1.08257	0.51712	1.61916	1.66051	-0.298367	0.105419	1.21755	2.24527
	0.672647	0.307417	0.89996	0.520668	0.649143	0.483643	0.581791	-0.109924	-0.324604	0.0409393	0.0251389		0.672647	0.870643	1.27845	-0.843979	0.104706	1.34001	1.914	0.556507	-0.526524	1.16859	2.66006	0.168682	0.849869	1.09851	1.1616	0.913254	0.690071	-0.321087	-0.291595	0.0810051	0.925041	-1.23361	-0.432396	1.03599	2.98712	1.35202	1.22358	1.6098	0.885132	0.979057	0.448586	1.5597	1.61514	-0.261337	-0.0237541	1.24928	2.36354
	0.682887	0.206223	0.808178	0.385334	0.533997	0.289776	0.463631	-0.171753	-0.444221	0.00274277	-0.0116806		0.682887	0.872598	1.23529	-0.805138	0.00357819	1.33271	1.87505	0.940254	-0.524807	1.14049	2.69317	0.0684433	0.991821	1.03629	1.17952	0.882675	0.725807	-0.33482	-0.247715	-0.0188217	0.856796	-1.26694	-0.350475	1.0505	2.97319	1.23925	1.15596	1.56786	0.890102	0.925007	0.364319	1.63601	1.61915	-0.268085	-0.149307	1.26206	2.39825
	0.693127	0.0819401	0.640308	0.243103	0.462486	0.186375	0.372658	-0.317474	-0.433098	-0.186729	-0.230167		0.693127	0.865275	1.29074	-0.793026	-0.0613556	1.28917	1.84077	0.961258	-0.586018	1.08379	2.73261	0.0898285	1.13658	0.954666	1.13808	0.889183	0.601151	-0.41666	-0.271137	-0.0791779	0.817894	-1.28114	-0.278069	1.08607	2.95219	1.21601	1.07967	1.47078	0.872684	0.888084	0.331776	1.62268	1.71201	-0.123737	-0.201416	1.30774	2.46569
	0.703367	-0.0149761	0.578369	0.101067	0.399998	0.118092	0.274811	-0.355495	-0.50267	-0.325249	-0.423706		0.703367	0.856903	1.35943	-0.81955	-0.0889626	1.14814	1.82726	0.719547	-0.614525	1.08892	2.76133	0.148705	1.25427	0.898422	1.22278	0.935356	0.539795	-0.498421	-0.283073	-0.128197	0.779694	-1.25905	-0.20113	1.2085	3.03184	1.24831	0.967995	1.45498	0.81456	0.817814	0.298611	1.49898	1.69411	-0.0158768	-0.203403	1.31724	2.44141
	0.713607	-0.0638597	0.593666	0.0397224	0.337532	0.0839119	0.187328	-0.368473	-0.613403	-0.398148	-0.436874		0.713607	0.830408	1.36251	-0.917038	-0.0892639	1.04141	1.83162	0.420036	-0.678585	0.994339	2.77704	0.221054	1.33519	0.860168	1.22221	0.812904	0.355309	-0.524734	-0.356552	-0.152538	0.804161	-1.29166	-0.0333405	1.33876	3.08192	1.16491	0.92012	1.38706	0.738159	0.723019	0.248981	1.39823	1.64308	0.034111	-0.159176	1.23034	2.51455
	0.723847	-0.0900442	0.52713	-0.0356674	0.283363	0.110725	0.107838	-0.379456	-0.701271	-0.343369	-0.379692		0.723847	0.812217	1.5298	-0.90538	-0.217197	0.889519	1.76254	0.203968	-0.82589	0.928989	2.87659	0.323479	1.24446	0.901524	1.39639	0.742092	0.285934	-0.565098	-0.384483	-0.166389	0.768471	-1.3511	0.0595703	1.40753	3.04687	1.11726	0.903297	1.4231	0.786179	0.618458	0.104141	1.34451	1.61772	0.0106583	-0.151737	1.09042	2.72454
	0.734087	-0.130873	0.395714	-0.169182	0.29155	0.102077	0.161015	-0.519146	-0.763119	-0.220749	-0.456013		0.734087	0.791333	1.47491	-0.942158	-0.24913	0.834244	1.71508	0.0505943	-0.917656	0.806396	3.00288	0.348392	1.12371	0.903263	1.55877	0.677803	0.269691	-0.564823	-0.408077	-0.233063	0.679722	-1.42809	0.0561638	1.45895	2.96232	1.01407	0.881329	1.40281	0.904266	0.49633	-0.0137405	1.24571	1.51834	0.0673065	-0.15131	1.08396	2.81338
	0.744327	-0.197903	0.245167	-0.2743	0.262142	-0.0102158	0.191677	-0.608608	-0.794258	-0.253841	-0.538887		0.744327	0.780471	1.3472	-1.0377	-0.19482	0.789276	1.83345	-0.0872231	-0.934124	0.747158	3.19606	0.268616	1.08852	0.902035	1.64821	0.678875	0.270035	-0.61636	-0.495888	-0.415993	0.559105	-1.36059	0.131599	1.55697	2.89783	1.00314	0.800346	1.38321	0.921562	0.358765	-0.0399933	1.13203	1.39104	0.0469437	-0.0845757	1.05776	2.91397
	0.754567	-0.266648	0.1474	-0.325607	0.177814	-0.163982	0.18121	-0.691116	-0.776112	-0.300644	-0.648796		0.754567	0.767008	1.28901	-1.057	-0.139618	0.715199	1.81822	-0.252247	-0.884293	0.65905	3.24167	0.210251	1.02015	0.938931	1.75543	0.631405	0.256004	-0.635323	-0.582153	-0.492142	0.406242	-1.37135	0.260632	1.57625	2.74952	0.99136	0.671688	1.4051	0.918762	0.383018	-0.0714378	1.04662	1.35648	0.0622749	0.00721741	1.00266	2.93481
	0.764807	-0.367823	0.0436668	-0.426575	0.0676193	-0.388618	0.100616	-0.774788	-0.823914	-0.420345	-0.688072		0.764807	0.757147	1.21291	-1.07243	-0.0900497	0.741722	1.76122	-0.249229	-0.877617	0.672642	3.31499	0.106018	1.07639	0.835648	1.8315	0.540447	0.159145	-0.591537	-0.600632	-0.48914	0.300732	-1.43617	0.275459	1.61633	2.67126	0.961391	0.578941	1.37953	0.918152	0.300636	-0.0537376	1.03659	1.23997	0.106907	-0.112732	0.964905	3.02785
	0.775047	-0.455581	-0.0452271	-0.51627	-0.0477066	-0.464188	-0.0641556	-0.747059	-0.942482	-0.502502	-0.770638		0.775047	0.73881	1.22065	-1.04453	-0.205017	0.649094	1.58379	-0.227985	-0.733265	0.592342	3.42665	0.0549316	1.17625	0.757423	1.98535	0.497307	0.0575333	-0.606022	-0.593826	-0.527882	0.165718	-1.42279	0.268143	1.68359	2.51645	0.933899	0.442078	1.35054	0.894928	0.174324	-0.0835419	0.926472	1.21354	0.217285	-0.151024	0.92086	3.07542
	0.785287	-0.54727	-0.0809784	-0.635147	-0.184429	-0.562859	-0.165428	-0.78299	-0.982414	-0.693668	-0.837517		0.785287	0.72879	1.1311	-0.992271	-0.305603	0.556602	1.54283	-0.242519	-0.675034	0.581493	3.46925	0.0445747	1.2319	0.68821	2.07838	0.538292	-0.00561142	-0.692162	-0.503086	-0.525879	0.0182304	-1.46476	0.333847	1.6901	2.41462	0.892345	0.31102	1.32468	0.878479	0.1563	-0.164268	0.785461	1.193	0.351494	-0.129829	1.00178	3.12118
	0.795527	-0.633579	-0.228752	-0.730797	-0.222122	-0.687325	-0.235451	-0.745964	-1.10917	-0.789558	-0.953075		0.795527	0.730202	1.15952	-0.948284	-0.476463	0.548317	1.56886	-0.317131	-0.686272	0.64056	3.50222	-0.00530243	1.28915	0.647095	2.10909	0.563232	-0.10656	-0.854942	-0.529751	-0.651154	-0.0178909	-1.48414	0.467205	1.67371	2.42884	0.861851	0.239052	1.31146	0.944199	0.116135	-0.276287	0.730194	1.18494	0.527706	-0.172577	1.06731	3.16068
	0.805767	-0.668059	-0.212334	-0.859783	-0.293911	-0.666401	-0.346794	-0.683823	-1.20375	-0.773499	-0.972237		0.805767	0.720333	1.23734	-0.964436	-0.567207	0.551891	1.5621	-0.333508	-0.712109	0.544216	3.48012	0.0319481	1.34479	0.585033	2.1212	0.421333	-0.16272	-0.919064	-0.494099	-0.732143	0.00643921	-1.48092	0.505402	1.61626	2.36854	0.81815	0.231686	1.2874	1.01626	0.00872803	-0.394844	0.689888	1.1964	0.565544	-0.287769	1.15615	3.11276
	0.816007	-0.673541	-0.195358	-0.978027	-0.00416183	-0.689995	-0.358482	-0.768063	-1.29006	-0.79533	-0.982391		0.816007	0.707139	1.30283	-1.00085	-0.602291	0.447289	1.63217	-0.34705	-0.694832	0.471046	3.51461	0.0938644	1.40679	0.519173	2.11728	0.343254	-0.23111	-1.0665	-0.517845	-0.756668	0.0261459	-1.61906	0.547661	1.60398	2.31609	0.742626	0.287548	1.30399	0.932407	-0.0665283	-0.451763	0.48465	1.20077	0.666588	-0.302029	1.21402	3.02695
	0.826247	-0.669949	-0.220047	-1.022	0.341705	-0.711979	-0.377556	-0.828709	-1.36204	-0.780571	-1.06835		0.826247	0.688546	1.30841	-1.04656	-0.700268	0.503445	1.55552	-0.381611	-0.641235	0.447536	3.63252	0.00726318	1.48663	0.490513	2.14035	0.300621	-0.326023	-1.16137	-0.581703	-0.778961	-0.0737915	-1.69659	0.766396	1.69489	2.2438	0.74892	0.302673	1.22026	0.975086	-0.118504	-0.572968	0.276817	1.0963	0.717606	-0.291618	1.16132	3.07295
	0.836487	-0.723921	-0.291481	-1.07809	0.219498	-0.761475	-0.429596	-0.917385	-1.34851	-0.801323	-1.10693		0.836487	0.674866	1.33541	-1.05788	-0.765404	0.597923	1.42645	-0.471195	-0.564503	0.412132	3.76962	-0.0898361	1.51934	0.398651	2.24501	0.317184	-0.361633	-1.15461	-0.666115	-0.672386	-0.218056	-1.72629	1.06522	1.64303	2.23353	0.702183	0.230446	1.132	0.970936	-0.239094	-0.720535	0.17836	0.945282	0.771095	-0.215862	1.19732	3.09736
	0.846727	-0.791634	-0.366318	-1.12444	0.0705986	-0.749538	-0.536728	-1.02281	-1.42262	-0.829399	-1.14344		0.846727	0.666386	1.25377	-1.09837	-0.864006	0.674477	1.3781	-0.560841	-0.471172	0.340858	3.74452	-0.22142	1.5989	0.298088	2.31685	0.366371	-0.409683	-1.1521	-0.737572	-0.658138	-0.258812	-1.75967	1.20838	1.7312	2.15437	0.686325	0.1889	1.04077	0.985909	-0.314209	-0.744556	0.153542	0.953476	0.86031	-0.17688	1.23675	3.04268
	0.856967	-0.847117	-0.407265	-1.21593	-0.140118	-0.868191	-0.560066	-1.14741	-1.38823	-0.803173	-1.09366		0.856967	0.644776	1.13553	-1.17641	-0.957211	0.623562	1.24209	-0.530884	-0.445255	0.296463	3.73892	-0.340042	1.6838	0.318497	2.4217	0.409355	-0.487564	-1.13238	-0.81311	-0.594925	-0.267754	-1.88673	1.22304	1.83593	2.09138	0.679184	0.144447	1.03587	0.875618	-0.338753	-0.833641	0.200012	0.85614	0.917412	-0.180874	1.31359	2.92621
	0.867207	-0.898482	-0.516903	-1.28516	-0.330841	-0.954403	-0.572716	-1.2242	-1.27068	-0.77803	-1.15341		0.867207	0.620282	1.04606	-1.27077	-1.06665	0.516273	1.19626	-0.585968	-0.401436	0.321602	3.64818	-0.28046	1.73724	0.407734	2.49307	0.337051	-0.478218	-1.1407	-0.894413	-0.602253	-0.268173	-2.06698	1.21838	1.81713	1.97671	0.657295	0.0585938	1.05828	0.797939	-0.436878	-0.961327	0.227501	0.752441	0.985386	-0.131519	1.37445	2.86434
	0.877447	-0.944517	-0.674271	-1.40969	-0.466167	-0.946175	-0.523125	-1.20496	-1.30476	-0.771774	-1.19973		0.877447	0.616432	0.993458	-1.33254	-1.0834	0.488735	1.12133	-0.774742	-0.297546	0.345112	3.63152	-0.287041	1.74197	0.380817	2.6065	0.197281	-0.462891	-1.11644	-1.02084	-0.557137	-0.312145	-2.10598	1.18398	1.77204	1.95255	0.554516	-0.0164833	1.16041	0.820652	-0.40226	-1.0315	0.281788	0.724331	1.11305	-0.160717	1.38973	2.82313
	0.887687	-0.989056	-0.727531	-1.47383	-0.613392	-0.985573	-0.468338	-1.15948	-1.3976	-0.837681	-1.23808		0.887687	0.606652	0.981178	-1.40734	-1.12219	0.425007	1.08501	-0.906395	-0.114235	0.3354	3.61728	-0.262173	1.78604	0.216389	2.59282	0.101234	-0.485405	-1.07765	-1.10341	-0.473522	-0.477467	-2.02332	1.28852	1.75537	1.84503	0.416008	-0.0691986	1.16734	0.896923	-0.340755	-1.02306	0.294533	0.674702	1.19569	-0.179623	1.40154	2.7915
	0.897927	-1.03269	-0.711929	-1.54681	-0.717964	-1.05101	-0.401295	-1.20363	-1.39796	-0.92926	-1.33437		0.897927	0.591	1.01688	-1.37226	-1.22298	0.359001	0.967709	-0.945957	-0.00698471	0.393738	3.59242	-0.295589	1.87917	0.229015	2.56321	0.132656	-0.563179	-1.0675	-1.20597	-0.467594	-0.590012	-1.96833	1.38854	1.73454	1.78215	0.372269	-0.125942	1.03344	0.901844	-0.275097	-1.03529	0.308933	0.675098	1.29446	-0.0738945	1.409	2.80752
	0.908167	-1.09501	-0.769222	-1.62145	-0.70536	-1.16996	-0.42168	-1.24993	-1.39166	-1.08443	-1.44143		0.908167	0.575918	1.10595	-1.3814	-1.29425	0.275135	0.873917	-0.987946	0.109795	0.369122	3.5526	-0.255226	1.94439	0.176064	2.54507	0.190544	-0.674923	-1.12339	-1.28267	-0.519093	-0.690365	-2.01037	1.49767	1.74858	1.71812	0.371613	-0.190163	0.87289	0.80986	-0.290211	-1.14331	0.334335	0.558472	1.33951	0.0837326	1.51653	2.82948
	0.918407	-1.1374	-0.814926	-1.68284	-0.747513	-1.19439	-0.378647	-1.30157	-1.42085	-1.13765	-1.55822		0.918407	0.574802	1.18394	-1.38982	-1.33152	0.271561	0.767376	-1.11055	0.211395	0.381161	3.52198	-0.197861	2.01046	0.0703011	2.40311	0.127594	-0.618347	-1.21	-1.40572	-0.559433	-0.719189	-2.07005	1.64015	1.6638	1.60472	0.320938	-0.203999	0.793648	0.864162	-0.228889	-1.2299	0.318279	0.396469	1.31294	0.162792	1.60887	2.94852
	0.928648	-1.14946	-0.798023	-1.78311	-0.669621	-1.27499	-0.334976	-1.40977	-1.42063	-1.11395	-1.54008		0.928648	0.566388	1.22305	-1.42439	-1.27721	0.333729	0.670403	-1.21232	0.291695	0.429668	3.46016	-0.161774	2.13734	-0.0272255	2.23751	0.0284424	-0.592907	-1.22115	-1.50182	-0.487194	-0.729378	-2.17998	1.80897	1.53619	1.522	0.280682	-0.19265	0.751274	0.823044	-0.163326	-1.27911	0.247566	0.238934	1.23819	0.14949	1.59559	3.09851
	0.938888	-1.16094	-0.871624	-1.8401	-0.535271	-1.30109	-0.386726	-1.4579	-1.36095	-1.12654	-1.56827		0.938888	0.558431	1.22795	-1.39172	-1.23175	0.303139	0.63044	-1.30179	0.378395	0.512924	3.44521	-0.0715103	2.14705	-0.0809517	2.07073	-0.00414658	-0.437054	-1.19057	-1.45675	-0.436241	-0.797272	-2.27537	1.82059	1.44024	1.56669	0.264481	-0.236225	0.759426	0.737183	-0.247749	-1.28992	0.213402	0.201004	1.20597	0.121593	1.56181	3.15353
	0.949128	-1.2147	-0.970184	-1.90247	-0.663731	-1.48174	-0.42664	-1.3958	-1.35909	-1.15987	-1.57279		0.949128	0.554177	1.29053	-1.35706	-1.17934	0.198769	0.646927	-1.36007	0.400032	0.523796	3.47177	-0.0587769	2.1569	-0.193794	2.06823	0.0634193	-0.41674	-1.21294	-1.41331	-0.510834	-0.808365	-2.43018	1.86589	1.34857	1.49925	0.179878	-0.265869	0.645279	0.733391	-0.30162	-1.22227	0.210541	0.239326	1.16329	0.0194473	1.59206	3.11105
	0.959368	-1.25586	-0.954212	-1.97469	-0.780415	-1.52495	-0.507114	-1.39243	-1.38332	-1.14015	-1.64544		0.959368	0.554703	1.35223	-1.33723	-1.12371	0.0892792	0.631657	-1.43657	0.516479	0.520222	3.48267	-0.108395	2.11892	-0.321518	2.08885	0.142208	-0.461411	-1.14478	-1.31532	-0.551899	-0.87788	-2.46127	2.02779	1.2964	1.38461	0.264336	-0.328205	0.52557	0.73518	-0.291801	-1.32975	0.285164	0.130787	1.14509	0.0366592	1.62794	3.04033
	0.969608	-1.29603	-0.959442	-2.05597	-0.884594	-1.63349	-0.469254	-1.43439	-1.42724	-1.14537	-1.65447		0.969608	0.546831	1.31077	-1.30022	-1.03865	0.0558777	0.609257	-1.5878	0.581852	0.507679	3.42869	-0.102875	2.14055	-0.371429	2.01423	0.0314484	-0.469238	-1.22529	-1.35825	-0.649128	-0.94212	-2.44303	2.17748	1.26652	1.30685	0.306717	-0.455879	0.381866	0.685097	-0.30547	-1.42596	0.285843	0.0105782	1.11593	0.0821609	1.58589	2.90946
	0.979848	-1.33005	-0.975357	-2.09946	-0.93943	-1.61376	-0.414917	-1.50521	-1.46298	-1.22547	-1.73387		0.979848	0.546427	1.29547	-1.29893	-0.918793	-0.00921249	0.554871	-1.67781	0.645798	0.586845	3.353	-0.0682831	2.26331	-0.364574	2.01814	-0.0555038	-0.547058	-1.28701	-1.37015	-0.658688	-0.99419	-2.51165	2.20188	1.28822	1.2179	0.318638	-0.592312	0.32325	0.640751	-0.422859	-1.5434	0.241257	-0.120293	1.03994	0.132252	1.61838	2.90296
	0.990088	-1.39068	-1.0055	-2.22427	-1.00604	-1.6825	-0.333561	-1.65562	-1.5054	-1.34875	-1.75445		0.990088	0.546355	1.32841	-1.42024	-0.780365	0.00823975	0.480858	-1.70339	0.78651	0.660229	3.36981	-0.0956764	2.37622	-0.332664	2.07416	-0.0376053	-0.566563	-1.15028	-1.31923	-0.618824	-1.03009	-2.56495	2.2748	1.38473	1.19967	0.297585	-0.712059	0.195473	0.553432	-0.462791	-1.60012	0.226807	-0.19537	1.02166	0.171543	1.55817	2.82604
	1.00033	-1.44045	-0.948872	-2.27853	-1.08725	-1.74989	-0.333443	-1.75286	-1.49432	-1.47305	-1.84586		1.00033	0.548734	1.33697	-1.45143	-0.701794	0.109543	0.479404	-1.73277	0.982716	0.627769	3.3849	-0.100395	2.40125	-0.281818	1.99699	0.0246429	-0.523304	-1.09976	-1.3315	-0.602993	-1.16502	-2.57374	2.39812	1.42996	1.08557	0.308552	-0.621376	0.149155	0.542656	-0.453899	-1.56619	0.30164	-0.242783	0.995865	0.284672	1.5675	2.76519
	1.01057	-1.48925	-0.981735	-2.22887	-1.17332	-1.80817	-0.445595	-1.87907	-1.43804	-1.57102	-1.87743		1.01057	0.551666	1.4054	-1.42841	-0.600361	0.180603	0.41267	-1.7732	1.16631	0.513245	3.41226	-0.171612	2.34388	-0.26754	1.93782	0.0793953	-0.518116	-1.08466	-1.41738	-0.636131	-1.30263	-2.563	2.52577	1.34989	1.04989	0.267353	-0.516304	0.113575	0.502064	-0.393707	-1.53313	0.425339	-0.294899	1.06749	0.317955	1.55384	2.78348
	1.02081	-1.54061	-1.02924	-2.28442	-1.2117	-1.94238	-0.483322	-1.83274	-1.54283	-1.6545	-1.88436		1.02081	0.55104	1.39215	-1.40228	-0.39645	0.165703	0.28677	-1.85945	1.17524	0.437325	3.44304	-0.106987	2.25375	-0.313721	1.84317	0.116661	-0.588703	-1.05585	-1.45267	-0.673206	-1.31615	-2.4986	2.59432	1.34338	1.03022	0.218861	-0.323898	-0.0562439	0.530174	-0.329838	-1.53712	0.515499	-0.200066	1.02367	0.390984	1.4918	2.78672
	1.03105	-1.56426	-1.02099	-2.33461	-1.31778	-1.90792	-0.574432	-1.87127	-1.53827	-1.65249	-1.86062		1.03105	0.549136	1.43468	-1.41348	-0.226341	0.0694504	0.236534	-2.00209	1.26104	0.370266	3.3296	-0.131203	2.18599	-0.353168	1.75199	0.169125	-0.548992	-1.12715	-1.3901	-0.604805	-1.38167	-2.35888	2.72081	1.25222	1.02339	0.33374	-0.348804	-0.172173	0.572052	-0.314308	-1.50715	0.523521	-0.25296	0.878765	0.432419	1.37483	2.78257
	1.04129	-1.58302	-1.02576	-2.44181	-1.23338	-1.95366	-0.681278	-1.87048	-1.53464	-1.57737	-1.92882		1.04129	0.543948	1.45617	-1.44336	-0.130161	0.128628	0.252319	-2.10188	1.42558	0.39753	3.25381	-0.0716286	2.1949	-0.428375	1.60499	0.208214	-0.452503	-1.17722	-1.32563	-0.563202	-1.40718	-2.21704	2.76086	1.18452	0.960304	0.358524	-0.397713	-0.254868	0.578251	-0.304054	-1.47936	0.540104	-0.311359	0.790882	0.664497	1.25306	2.80609
	1.05153	-1.59133	-1.10175	-2.50646	-1.1855	-1.92344	-0.738834	-1.853	-1.61891	-1.47942	-1.91466		1.05153	0.537551	1.4986	-1.4749	0.0331306	0.150776	0.181068	-2.16894	1.58261	0.468445	3.13095	-0.118385	2.27981	-0.500046	1.46221	0.135033	-0.339363	-1.19173	-1.30539	-0.606544	-1.42825	-2.09239	2.83514	1.15965	0.911213	0.447479	-0.268696	-0.295017	0.446671	-0.292454	-1.51551	0.440517	-0.328575	0.683643	0.831581	1.13794	2.67472
	1.06177	-1.57733	-1.17799	-2.54659	-1.13416	-1.84983	-0.716682	-1.7878	-1.63599	-1.45656	-1.89041		1.06177	0.535558	1.51183	-1.54384	0.19342	0.195042	0.123444	-2.15874	1.61609	0.415245	3.09395	-0.0917511	2.23703	-0.516758	1.30344	0.0834846	-0.275848	-1.15231	-1.31319	-0.622589	-1.40569	-1.97264	2.84953	1.117	0.828529	0.57769	-0.180222	-0.334988	0.221493	-0.292538	-1.49172	0.362389	-0.399063	0.609367	0.823681	1.09405	2.51744
	1.07201	-1.57504	-1.20088	-2.502	-1.08747	-1.83654	-0.781391	-1.77089	-1.66862	-1.48701	-1.84053		1.07201	0.54019	1.62595	-1.57629	0.318577	0.178696	0.0455551	-2.2081	1.69139	0.398674	3.04787	-0.0319939	2.29781	-0.541958	1.20268	0.0144157	-0.265408	-1.12254	-1.32971	-0.744686	-1.46484	-1.93221	2.90585	1.13599	0.788784	0.621033	-0.15974	-0.350319	0.0825653	-0.224457	-1.48676	0.331558	-0.37365	0.502411	0.845116	1.01295	2.50489
	1.08225	-1.55658	-1.25064	-2.4132	-1.1173	-1.88451	-0.763794	-1.79053	-1.61935	-1.4533	-1.71663		1.08225	0.538129	1.66922	-1.57401	0.354877	0.178566	0.0451584	-2.29764	1.70488	0.472084	3.0496	0.00224304	2.22019	-0.641068	1.14244	0.0652809	-0.280819	-1.12207	-1.28361	-0.869438	-1.46104	-1.88962	2.94176	1.11134	0.659958	0.600697	-0.147972	-0.50219	0.0465622	-0.16893	-1.4744	0.223866	-0.390182	0.478951	0.915901	1.01789	2.4326
	1.09249	-1.58498	-1.34461	-2.41079	-1.22657	-1.89487	-0.700485	-1.72864	-1.58867	-1.57761	-1.79262		1.09249	0.539631	1.65718	-1.55911	0.489498	0.19603	0.0424385	-2.36438	1.81002	0.609161	3.05219	-0.0105934	2.15055	-0.635315	1.04944	0.0757713	-0.245415	-1.0259	-1.19796	-0.948174	-1.52112	-1.94796	2.87763	1.12466	0.544167	0.567486	-0.219639	-0.509319	-0.0760078	-0.250221	-1.35464	0.212193	-0.410793	0.44698	1.04771	1.10649	2.30302
	1.10273	-1.62069	-1.41226	-2.48307	-1.28488	-1.85523	-0.706875	-1.68928	-1.65384	-1.6599	-1.84089		1.10273	0.536727	1.63485	-1.60516	0.603889	0.135078	0.0126381	-2.47853	1.81174	0.705948	2.96456	-0.120075	2.10252	-0.630424	0.969528	0.109642	-0.322247	-0.931175	-1.14339	-0.970123	-1.55376	-1.99537	2.8505	1.13236	0.472561	0.521961	-0.318275	-0.485298	-0.0302162	-0.275524	-1.29659	0.332642	-0.534698	0.607052	1.16636	1.14809	2.15835
	1.11297	-1.66809	-1.48423	-2.60501	-1.20856	-1.90808	-0.615929	-1.72123	-1.81142	-1.75774	-1.90065		1.11297	0.540584	1.52494	-1.60668	0.706043	0.062706	-0.00481415	-2.48574	1.86252	0.692917	2.8161	-0.154137	2.02689	-0.672318	0.962662	0.198166	-0.34132	-0.907803	-1.03665	-0.999973	-1.48034	-1.9379	2.78033	1.13115	0.495522	0.481621	-0.328716	-0.491817	0.0582237	-0.374481	-1.24166	0.395275	-0.611996	0.656071	1.31654	1.11143	2.03672
	1.12321	-1.72209	-1.68143	-2.64498	-1.15069	-1.99191	-0.681675	-1.70007	-1.92381	-1.7896	-1.93466		1.12321	0.542187	1.45618	-1.54127	0.857487	0.0485687	-0.133095	-2.49682	1.88758	0.773003	2.65851	-0.181469	1.9982	-0.695297	0.914471	0.0946426	-0.347576	-0.900864	-0.947792	-1.02618	-1.49058	-1.89727	2.75547	1.19598	0.581684	0.449898	-0.266716	-0.617886	-0.0159836	-0.500187	-1.19769	0.356079	-0.572609	0.595226	1.43636	1.04333	2.00106
	1.13345	-1.73857	-1.69824	-2.61074	-1.12277	-2.03988	-0.780937	-1.69684	-1.89478	-1.8834	-1.91954		1.13345	0.533761	1.36203	-1.54848	0.907436	0.0511322	-0.120567	-2.56778	1.97778	0.733627	2.49608	-0.150261	1.99156	-0.727367	0.831547	0.0944862	-0.409649	-0.886543	-0.851734	-1.01788	-1.54753	-1.84179	2.74674	1.26233	0.486031	0.409912	-0.177692	-0.592957	-0.0157585	-0.534248	-1.14365	0.193848	-0.590523	0.479652	1.52593	0.944782	1.97952
	1.14369	-1.77567	-1.71666	-2.66175	-1.12424	-2.07402	-0.850365	-1.77793	-1.8931	-1.89196	-1.99101		1.14369	0.524857	1.33459	-1.48623	0.91777	0.0189552	-0.0658035	-2.60937	2.0565	0.672428	2.46431	-0.08815	2.02213	-0.650597	0.734974	0.0857506	-0.493702	-0.917957	-0.77673	-0.951172	-1.71624	-1.76688	2.80329	1.2211	0.395679	0.34938	-0.170597	-0.5924	-0.0727158	-0.648079	-1.15677	0.0914497	-0.619434	0.410152	1.56209	0.904839	1.92263
	1.15393	-1.79561	-1.70748	-2.70538	-1.2458	-2.08647	-0.879738	-1.78296	-1.90099	-1.81099	-2.04068		1.15393	0.517454	1.36386	-1.41377	0.894024	0.0143204	-0.0775566	-2.60349	2.02108	0.742008	2.43594	-0.0177956	2.01252	-0.622581	0.686089	0.041954	-0.610802	-0.999378	-0.690018	-0.920509	-1.7658	-1.70983	2.82024	1.13873	0.317314	0.335709	-0.0582199	-0.547417	-0.0605202	-0.699196	-1.07482	-0.0156631	-0.628456	0.310387	1.70304	0.819008	1.87046
	1.16417	-1.77846	-1.62517	-2.80873	-1.35699	-2.08303	-0.923859	-1.66476	-1.8649	-1.71	-1.96873		1.16417	0.509105	1.42758	-1.34615	0.912689	0.0294342	-0.107861	-2.64622	2.07803	0.785175	2.37159	0.000492096	1.97687	-0.776085	0.666061	-0.0110626	-0.645859	-1.02099	-0.667141	-0.904949	-1.66118	-1.69234	2.74935	1.02293	0.271202	0.402348	-0.00592041	-0.662598	-0.18222	-0.681541	-0.95396	-0.0504494	-0.633892	0.386406	1.86641	0.761024	1.69362
	1.17441	-1.75853	-1.53512	-2.7483	-1.40025	-2.11127	-0.99902	-1.52744	-1.85655	-1.76173	-1.88705		1.17441	0.499877	1.49477	-1.43355	0.988724	0.00524521	-0.191925	-2.76179	2.11889	0.778271	2.36663	-0.0148048	1.97952	-0.912102	0.589848	-0.0479927	-0.642021	-0.946568	-0.629807	-0.930153	-1.59908	-1.62139	2.7919	0.988785	0.222137	0.368813	0.0218163	-0.708748	-0.312874	-0.72155	-0.84742	-0.109253	-0.654961	0.326942	1.91671	0.777832	1.49314
	1.18465	-1.758	-1.50665	-2.73263	-1.39748	-2.09601	-0.992668	-1.53906	-1.89576	-1.79962	-1.86208		1.18465	0.497503	1.54276	-1.53593	1.09026	-0.0153618	-0.224361	-2.73715	2.11148	0.797432	2.31334	-0.0706749	1.95593	-0.858948	0.576843	0.0403404	-0.573467	-0.822327	-0.619183	-0.904331	-1.59286	-1.57938	2.82599	0.913181	0.225712	0.335815	0.108807	-0.651417	-0.286541	-0.84351	-0.793941	-0.173042	-0.651535	0.312439	2.06968	0.692799	1.27546
	1.19489	-1.79006	-1.55586	-2.74699	-1.48856	-2.13499	-1.02707	-1.50952	-1.95521	-1.83173	-1.86061		1.19489	0.4892	1.52966	-1.51932	1.11766	-0.0957947	-0.336178	-2.75603	2.10365	0.80986	2.30255	-0.326633	1.95882	-0.801968	0.41547	0.00917053	-0.546726	-0.716812	-0.644905	-0.926311	-1.66864	-1.5024	2.83767	0.825264	0.238029	0.390911	0.24852	-0.705696	-0.313805	-0.977383	-0.770496	-0.210892	-0.571663	0.677696	2.23083	0.699059	1.15804
	1.20513	-1.81417	-1.56363	-2.77866	-1.54266	-2.20785	-1.11943	-1.5651	-1.82168	-1.898	-1.83052		1.20513	0.473663	1.44384	-1.47932	1.18436	-0.203522	-0.409576	-2.83883	2.07576	0.796104	2.2347	-0.373337	1.8951	-0.806904	0.376678	0.0247879	-0.632271	-0.684738	-0.680969	-1.11625	-1.63494	-1.41244	2.75991	0.7411	0.247955	0.357773	0.336208	-0.787766	-0.381016	-0.990509	-0.811848	-0.185284	-0.582027	0.852123	2.38713	0.573921	1.06977
	1.21537	-1.85404	-1.65857	-2.72391	-1.57	-2.2569	-1.22258	-1.65593	-1.88817	-1.92859	-1.7817		1.21537	0.46183	1.39574	-1.45691	1.13182	-0.343903	-0.462326	-2.85712	2.01936	0.769951	2.12404	-0.314831	1.82089	-0.927124	0.364986	0.0677986	-0.640709	-0.67168	-0.60788	-1.25947	-1.60706	-1.29557	2.61478	0.678707	0.234333	0.249187	0.457493	-0.858829	-0.422691	-1.01507	-0.869591	-0.146015	-0.70145	0.771824	2.66206	0.439453	0.871803
	1.22561	-1.91779	-1.72615	-2.71976	-1.66794	-2.36062	-1.20753	-1.72529	-1.98419	-1.97699	-1.89164		1.22561	0.452548	1.28641	-1.40544	1.08937	-0.404034	-0.573978	-2.78817	2.01403	0.722694	1.95171	-0.345657	1.73089	-0.983597	0.318233	0.100555	-0.596405	-0.612553	-0.509079	-1.31495	-1.70212	-1.23917	2.63759	0.638535	0.206234	0.15004	0.573208	-0.908859	-0.42672	-0.982269	-0.882492	-0.223183	-0.831604	0.565399	2.84273	0.459339	0.723328
	1.23585	-1.93218	-1.72073	-2.7522	-1.69141	-2.42065	-1.1707	-1.77773	-1.97567	-1.92677	-1.9538		1.23585	0.449137	1.228	-1.35538	1.13019	-0.349434	-0.531921	-2.61464	1.97179	0.62162	1.94637	-0.297451	1.68279	-0.993988	0.324203	0.14806	-0.525986	-0.618313	-0.44883	-1.33593	-1.67161	-1.16821	2.60247	0.649776	0.120285	0.161983	0.64241	-0.849674	-0.483162	-1.07983	-0.910458	-0.281391	-0.858006	0.4543	2.96314	0.478077	0.632359
	1.24609	-1.94589	-1.78753	-2.79064	-1.6623	-2.4876	-1.13186	-1.78093	-1.97093	-1.93984	-1.96134		1.24609	0.453385	1.20909	-1.29654	1.17309	-0.306664	-0.498318	-2.63315	1.95586	0.648037	1.94707	-0.309013	1.74356	-1.03551	0.32835	0.0757942	-0.576885	-0.55085	-0.320885	-1.35684	-1.72041	-0.66259	2.66742	0.662628	0.0301514	0.111809	0.654404	-0.789459	-0.473866	-1.42369	-0.996311	-0.276978	-0.785645	0.329876	3.23191	0.433769	0.630775
	1.25633	-1.91807	-1.81544	-2.77687	-1.56369	-2.40002	-1.13725	-1.81085	-1.96247	-1.90723	-1.88885		1.25633	0.452327	1.27263	-1.2752	1.08663	-0.234482	-0.499783	-2.66539	1.99886	0.684608	1.87759	-0.398643	1.79042	-1.02433	0.422001	0.067894	-0.624725	-0.484905	-0.257515	-1.34167	-1.72581	-0.42902	2.63889	0.65023	0.103035	0.113789	0.6716	-0.780876	-0.438618	-1.38991	-1.08105	-0.28796	-0.701485	0.26025	3.40216	0.352409	0.457443
	1.26657	-1.89047	-1.83415	-2.85821	-1.43861	-2.40311	-1.12902	-1.86603	-1.79787	-1.8592	-1.82806		1.26657	0.438138	1.23761	-1.18447	1.10107	-0.188385	-0.518448	-2.69646	2.03364	0.656033	1.7959	-0.355038	1.76139	-0.984272	0.337925	0.026535	-0.637039	-0.511288	-0.27301	-1.40235	-1.63958	-0.498699	2.59325	0.590183	0.144283	0.0194473	0.679588	-0.861298	-0.475723	-1.20215	-1.02153	-0.324329	-0.709923	0.218407	3.45782	0.373363	0.369408
	1.27681	-1.88277	-1.80044	-2.85937	-1.46166	-2.4651	-1.14951	-1.86917	-1.68652	-1.89346	-1.75966		1.27681	0.428997	1.15894	-1.13907	1.06728	-0.206455	-0.459621	-2.72691	1.96916	0.614597	1.72526	-0.323627	1.78139	-0.978706	0.345364	-0.00315475	-0.538063	-0.483845	-0.346516	-1.48833	-1.56419	-0.552155	2.49013	0.498119	0.151817	-0.061058	0.569298	-0.96357	-0.512646	-1.07304	-0.85667	-0.342392	-0.739239	0.280403	3.54498	0.347069	0.275627
	1.28705	-1.86826	-1.77903	-2.87728	-1.54709	-2.35654	-1.14091	-1.8959	-1.65499	-1.89557	-1.66702		1.28705	0.42801	1.05364	-1.05453	1.02706	-0.207409	-0.427483	-2.72757	1.92966	0.495316	1.64365	-0.282249	1.67227	-0.929569	0.362659	-0.0288582	-0.425777	-0.436661	-0.310669	-1.43429	-1.49329	-0.589046	2.38351	0.514954	0.15234	-0.131485	0.39114	-0.996971	-0.499294	-0.955734	-0.773239	-0.341137	-0.714264	0.333252	3.5984	0.306168	0.216675
	1.29729	-1.83296	-1.82981	-2.86674	-1.58093	-2.2681	-1.09563	-1.87421	-1.62197	-1.75349	-1.60574		1.29729	0.417174	0.991013	-1.18945	1.05173	-0.255322	-0.4338	-2.71516	1.78672	0.503803	1.57801	-0.242279	1.6575	-0.864124	0.32618	-0.0475388	-0.45565	-0.345261	-0.236557	-1.36859	-1.58627	-0.587448	2.25959	0.545311	0.180435	-0.109612	0.266876	-0.902222	-0.492104	-0.951633	-0.678215	-0.402187	-0.718651	0.454609	3.66812	0.250771	0.110962
	1.30753	-1.81295	-1.7677	-2.82082	-1.64697	-2.28176	-1.11229	-1.83177	-1.5741	-1.6945	-1.58667		1.30753	0.411058	1.01128	-1.29405	1.0447	-0.306915	-0.492249	-2.83213	1.74426	0.520626	1.48182	-0.180031	1.59706	-0.859818	0.396515	-0.0963058	-0.565536	-0.157688	-0.146603	-1.36115	-1.6813	-0.464783	2.17113	0.560593	0.195591	-0.0968781	0.328159	-0.789413	-0.576759	-0.96035	-0.57497	-0.37635	-0.646568	0.464462	3.80206	0.165321	0.0251198
	1.31777	-1.83415	-1.80066	-2.74137	-1.55178	-2.27473	-1.2472	-1.90048	-1.56572	-1.74605	-1.67939		1.31777	0.410675	1.02514	-1.25991	1.06527	-0.260376	-0.432644	-2.89954	1.74892	0.637749	1.45461	-0.154648	1.55035	-0.878773	0.415936	-0.0772781	-0.630783	-0.0651588	-0.0947227	-1.39603	-1.72308	-0.318939	2.18451	0.565674	0.206306	-0.197372	0.327484	-0.78009	-0.645527	-0.947556	-0.567684	-0.331314	-0.623997	0.46114	3.76699	0.123825	-0.089859
	1.32801	-1.84039	-1.76753	-2.67614	-1.62643	-2.23026	-1.36528	-1.88207	-1.50974	-1.77152	-1.73454		1.32801	0.407005	0.921082	-1.16219	1.04474	-0.198101	-0.43684	-2.93887	1.64596	0.554539	1.44342	-0.14045	1.54516	-0.851852	0.545422	-0.138885	-0.65081	-0.0253525	-0.044426	-1.33913	-1.7683	-0.212177	2.15208	0.532127	0.292698	-0.290237	0.296951	-0.77338	-0.553379	-0.905331	-0.560913	-0.359283	-0.570618	0.509575	3.80521	0.0615845	-0.133991
	1.33825	-1.87553	-1.7529	-2.66963	-1.74176	-2.20996	-1.42239	-1.85355	-1.55293	-1.88035	-1.79631		1.33825	0.409423	0.876831	-1.12613	1.07385	-0.220737	-0.479992	-3.02372	1.64064	0.614952	1.36213	-0.113819	1.48032	-0.788101	0.584007	-0.132664	-0.651798	-0.0349274	0.0708733	-1.27538	-1.72107	-0.165939	1.99138	0.559868	0.436489	-0.447353	0.381638	-0.764774	-0.606796	-0.924633	-0.579033	-0.299358	-0.615692	0.489441	3.98741	0.0748634	-0.1968
	1.34849	-1.92004	-1.82389	-2.60173	-1.7815	-2.31126	-1.43676	-1.89454	-1.61787	-1.93875	-1.87405		1.34849	0.412936	0.763275	-1.12002	0.983086	-0.267776	-0.448654	-2.99448	1.60383	0.681892	1.29631	-0.149677	1.46095	-0.695786	0.5821	-0.295624	-0.680801	0.0216866	0.151516	-1.18764	-1.6873	-0.067337	1.79006	0.665306	0.538746	-0.437485	0.429153	-0.667618	-0.653336	-1.01764	-0.554012	-0.304634	-0.756073	0.49231	4.10779	0.0591507	-0.170597
	1.35873	-1.95611	-1.79793	-2.63176	-1.84032	-2.40508	-1.59158	-1.85489	-1.65581	-1.94167	-1.88596		1.35873	0.423121	0.704281	-1.0743	0.883427	-0.329018	-0.425171	-2.93515	1.64652	0.624527	1.23867	-0.225544	1.42204	-0.59211	0.573944	-0.416588	-0.648365	0.141373	0.162594	-1.19839	-1.56866	0.0792656	1.73619	0.705017	0.681709	-0.453472	0.365448	-0.491951	-0.630127	-1.0561	-0.600792	-0.359879	-0.640343	0.515297	4.15651	0.0233192	-0.124859
	1.36897	-1.98626	-1.83682	-2.78232	-1.89607	-2.41469	-1.67579	-1.8491	-1.63668	-1.94524	-1.83964		1.36897	0.426563	0.745514	-1.03979	0.823418	-0.481758	-0.283371	-2.93776	1.64785	0.552528	1.12019	-0.156116	1.40154	-0.567303	0.578571	-0.476002	-0.613102	0.204006	0.128998	-1.2085	-1.481	0.055172	1.64297	0.713959	0.932552	-0.305344	0.361149	-0.34058	-0.670872	-1.00076	-0.63076	-0.42511	-0.609478	0.638103	4.11818	0.0814362	-0.160656
	1.37921	-1.97603	-1.88619	-2.84982	-1.86105	-2.36327	-1.67292	-1.81098	-1.54211	-1.93785	-1.86003		1.37921	0.426397	0.716534	-0.989388	0.761738	-0.444817	-0.252197	-2.91004	1.66063	0.502769	0.924042	-0.169071	1.3868	-0.465153	0.542618	-0.538643	-0.630211	0.242973	0.01828	-1.1878	-1.37944	0.0468521	1.56974	0.777649	1.11547	-0.247551	0.362366	-0.308132	-0.65802	-0.813126	-0.638374	-0.551876	-0.558327	0.731922	4.12108	0.136032	-0.228867
	1.38945	-1.93254	-1.84486	-2.86926	-1.84335	-2.2539	-1.59406	-1.89302	-1.43811	-1.89056	-1.76577		1.38945	0.429021	0.774517	-0.944756	0.832691	-0.454506	-0.300465	-2.93942	1.66723	0.47691	0.770988	-0.252056	1.34904	-0.273354	0.501553	-0.482426	-0.450943	0.330402	-0.0018692	-1.15345	-1.31724	0.110474	1.44581	0.744724	1.20382	-0.288414	0.51152	-0.187	-0.501736	-0.72361	-0.535439	-0.669823	-0.522049	0.838806	4.13412	0.107384	-0.307522
	1.39969	-1.91723	-1.85735	-2.83414	-1.90253	-2.23123	-1.5336	-1.88955	-1.46935	-1.83615	-1.70116		1.39969	0.432354	0.878193	-0.878784	0.84026	-0.487137	-0.305588	-2.9526	1.69434	0.467731	0.581161	-0.377796	1.36545	-0.184807	0.429367	-0.401791	-0.259018	0.399685	-0.0738449	-1.18723	-1.33798	0.141327	1.35269	0.636261	1.36839	-0.365017	0.517334	-0.127491	-0.470901	-0.748371	-0.497696	-0.725445	-0.430592	0.967621	4.15586	0.13694	-0.358055
	1.40993	-1.90369	-1.88992	-2.83778	-1.89716	-2.14158	-1.59448	-1.86456	-1.43853	-1.81768	-1.65152		1.40993	0.440571	0.937393	-0.878605	0.840187	-0.531937	-0.318966	-2.84474	1.71731	0.511696	0.459743	-0.419624	1.31964	-0.144264	0.413872	-0.381565	-0.290848	0.562347	-0.195892	-1.28475	-1.30408	0.280857	1.25039	0.642467	1.54935	-0.446938	0.583889	-0.118885	-0.452717	-0.764927	-0.569271	-0.699337	-0.346088	1.02306	4.18766	0.229336	-0.407658
	1.42017	-1.91977	-1.94982	-2.86566	-1.98896	-2.1307	-1.59836	-1.87738	-1.37281	-1.826	-1.66829		1.42017	0.45777	0.927185	-0.876698	0.816704	-0.556477	-0.223621	-2.8216	1.73341	0.578682	0.443722	-0.457096	1.30293	-0.0301132	0.431755	-0.463898	-0.305637	0.602985	-0.250504	-1.3372	-1.14157	0.411179	1.19207	0.698616	1.61766	-0.476383	0.619377	0.00390244	-0.430187	-0.765823	-0.614914	-0.602627	-0.268875	1.13935	4.2575	0.349857	-0.514587
	1.43041	-1.89949	-1.90395	-2.79044	-2.07089	-2.11934	-1.59175	-1.80229	-1.40662	-1.80709	-1.60304		1.43041	0.466282	0.957298	-0.794647	0.796478	-0.580868	-0.212837	-2.76752	1.66365	0.621216	0.358788	-0.583801	1.33617	0.147308	0.377014	-0.541828	-0.292526	0.646664	-0.184677	-1.34139	-1.03176	0.556328	1.19128	0.737778	1.66151	-0.457169	0.660267	0.098362	-0.393364	-0.762497	-0.572872	-0.583206	-0.165054	1.17687	4.27978	0.376034	-0.620365
	1.44065	-1.87346	-1.9099	-2.7552	-1.99348	-2.14232	-1.53111	-1.77587	-1.43855	-1.8039	-1.51082		1.44065	0.479957	1.0574	-0.760372	0.858418	-0.640091	-0.23912	-2.74189	1.71003	0.593662	0.291626	-0.600433	1.29682	0.357216	0.448227	-0.601101	-0.336559	0.710678	-0.224503	-1.2199	-0.975594	0.639336	1.04629	0.754848	1.90294	-0.464783	0.647987	0.180355	-0.397858	-0.827942	-0.395344	-0.573227	-0.131805	1.1958	4.26577	0.353329	-0.579189
	1.45089	-1.88684	-1.86121	-2.63963	-2.02114	-2.13679	-1.59138	-1.86443	-1.49001	-1.83353	-1.54346		1.45089	0.496467	1.03082	-0.708874	0.903561	-0.587616	-0.192055	-2.73087	1.71011	0.565125	0.11491	-0.558838	1.25334	0.482109	0.504829	-0.651249	-0.400639	0.790016	-0.141987	-1.11091	-0.850628	0.785568	0.941982	0.900879	2.19855	-0.427399	0.545422	0.300575	-0.426792	-0.872311	-0.315353	-0.55798	-0.0521278	1.29078	4.31261	0.311317	-0.567657
	1.46113	-1.88565	-1.87111	-2.62127	-1.84796	-2.19959	-1.58083	-1.89544	-1.43821	-1.88531	-1.6311		1.46113	0.515383	0.926868	-0.593208	0.823322	-0.54892	-0.0329742	-2.6922	1.70423	0.486328	0.0440979	-0.547958	1.19619	0.61264	0.46077	-0.649117	-0.371288	0.803177	0.0130424	-1.02974	-0.756786	0.916794	0.811508	1.02419	2.41772	-0.462875	0.468445	0.519897	-0.376423	-0.927422	-0.309525	-0.511932	0.0755463	1.37104	4.37838	0.280739	-0.659775
	1.47137	-1.87245	-1.8656	-2.69152	-1.83946	-2.10332	-1.6209	-1.82456	-1.3297	-1.90064	-1.67637		1.47137	0.529677	0.860085	-0.590611	0.697018	-0.546227	0.0884209	-2.72753	1.82032	0.462746	-0.0758629	-0.519665	1.09	0.668922	0.419991	-0.625381	-0.365353	0.781036	-0.00852203	-0.947117	-0.593098	1.03886	0.713078	1.06916	2.65211	-0.440296	0.466492	0.684978	-0.365456	-1.01323	-0.277637	-0.459202	0.196983	1.43558	4.37098	0.235668	-0.605202
	1.48161	-1.8916	-1.90284	-2.64286	-1.88573	-2.34556	-1.66056	-1.75416	-1.29237	-1.84533	-1.69503		1.48161	0.538459	0.915997	-0.600346	0.620628	-0.536655	0.151577	-2.83866	1.97189	0.41349	-0.20319	-0.466949	0.985241	0.808956	0.337925	-0.609787	-0.406193	0.771011	-0.166473	-0.91687	-0.464844	1.21339	0.658577	1.08904	2.85911	-0.476669	0.559235	0.691559	-0.315269	-1.07841	-0.167305	-0.395164	0.243919	1.55946	4.37622	0.250648	-0.51585
	1.49185	-1.8938	-1.88076	-2.67746	-1.93464	-2.4997	-1.63116	-1.70176	-1.26514	-1.81093	-1.64263		1.49185	0.543531	0.881424	-0.646351	0.573563	-0.513489	0.147106	-2.81797	2.09831	0.362411	-0.343544	-0.474438	0.902176	0.887421	0.255146	-0.619564	-0.357414	0.808159	-0.232037	-0.841103	-0.294334	1.36808	0.711861	1.03807	2.95665	-0.476082	0.617672	0.733463	-0.323135	-1.1574	-0.152515	-0.359138	0.240757	1.80199	4.33731	0.284649	-0.518703
	Contralateral (top row)													Contralateral (top row)
	Click													Tone sustained
	Time re. IPSP trough (ms)	Mean Vmrel (mV)	Vm rel (mV)	Vm rel (mV)	Vm rel (mV)	Vm rel (mV)	Vm rel (mV)	Vm rel (mV)	Vm rel (mV)	Vm rel (mV)	Vm rel (mV)	Vm rel (mV)		Time re. IPSP trough (ms)	Mean Vmrel (mV)	Vm rel (mV)	Vm rel (mV)	Vm rel (mV)	Vm rel (mV)	Vm rel (mV)	Vm rel (mV)	Vm rel (mV)	Vm rel (mV)	Vm rel (mV)	Vm rel (mV)
	-0.996477	0.254766	0.693901	1.37246	-1.75463	0.169773	-1.02836	0.46664	0.0884132	3.79419	-0.717358	-0.537365		-0.996477	-0.812097	-3.41306	0.0782471	0.388302	-1.79086	-1.6793	0.625267	1.14526	-0.985336	-1.91205	-1.09921	-1.0265	-0.275925	-1.85269	-2.16937	-0.635086	0.244019	-2.23301	0.788853	-0.141171	-1.23127	-1.55128	-3.27663	-0.319412	-2.04723	-2.63063	-0.857285	-1.4553	-2.81961	0.082077	-1.84697	0.537312	-2.30165	-3.12985	-0.969254
	-0.986237	0.283696	0.682133	1.38463	-1.77444	0.103413	-0.984364	0.613827	0.180561	3.78382	-0.613194	-0.539429		-0.986237	-0.82485	-3.50159	0.0451431	0.344742	-1.82488	-1.65551	0.728165	1.22041	-0.933777	-1.83647	-1.14131	-1.03153	-0.368462	-1.8294	-2.22263	-0.49987	0.226749	-2.15386	0.855385	-0.075901	-1.25407	-1.60986	-3.26442	-0.315773	-1.99095	-2.6811	-0.870003	-1.55301	-2.85468	0.14286	-1.84921	0.631855	-2.36803	-3.11135	-1.01066
	-0.975997	0.296167	0.762482	1.33786	-1.79078	0.0557137	-0.91547	0.741665	0.263401	3.72813	-0.706177	-0.515156		-0.975997	-0.840726	-3.55647	-0.0946884	0.221264	-1.80257	-1.56752	0.880562	1.24576	-0.947201	-1.86919	-1.13108	-1.12794	-0.526096	-1.91264	-2.33558	-0.4576	0.180614	-2.11349	0.932571	-0.0708351	-1.20353	-1.73888	-3.22497	-0.329506	-2.01032	-2.74562	-0.808632	-1.58313	-2.86929	0.248718	-1.82813	0.668907	-2.47613	-3.12282	-1.05822
	-0.965757	0.343447	0.926624	1.31527	-1.63437	0.0814133	-0.846973	0.833839	0.212132	3.758	-0.713924	-0.49754		-0.965757	-0.860332	-3.68552	-0.238754	0.126686	-1.76452	-1.44442	0.971004	1.21774	-0.942932	-1.82182	-1.12609	-1.21944	-0.617443	-2.03362	-2.27197	-0.375298	0.132431	-2.11694	0.93428	0.0254974	-1.21744	-1.88552	-3.273	-0.332214	-2.16106	-2.80674	-0.740013	-1.52789	-2.8725	0.350155	-1.82769	0.638329	-2.52304	-3.1152	-0.95731
	-0.955517	0.355065	0.872978	1.37276	-1.60379	-0.0752373	-0.805107	0.862331	0.167091	3.83886	-0.717991	-0.361244		-0.955517	-0.87255	-3.60561	-0.324394	0.0892143	-1.6358	-1.46642	1.0306	1.19766	-0.865734	-1.83044	-1.17477	-1.29443	-0.657879	-2.07005	-2.26543	-0.282921	0.218811	-2.25667	0.859631	0.227394	-1.22491	-1.951	-3.24159	-0.391422	-2.20347	-2.83973	-0.684479	-1.57647	-2.93182	0.480148	-1.84002	0.678574	-2.60001	-3.16703	-0.927959
	-0.945277	0.324529	0.770554	1.42621	-1.71075	-0.185497	-0.856693	0.840015	0.197285	3.8788	-0.794605	-0.320034		-0.945277	-0.890193	-3.54045	-0.340664	-0.0281601	-1.4927	-1.59053	1.06188	1.05518	-0.792229	-1.84814	-1.23275	-1.25352	-0.728775	-2.04557	-2.21994	-0.2658	0.278221	-2.31183	0.768173	0.313034	-1.34239	-1.96455	-3.21777	-0.464905	-2.2028	-2.90495	-0.719177	-1.58287	-2.93565	0.539005	-1.83044	0.691235	-2.71564	-3.07567	-0.979553
	-0.935037	0.309884	0.692051	1.38607	-1.71715	-0.133362	-0.807838	0.740276	0.200687	3.83666	-0.79929	-0.299267		-0.935037	-0.905152	-3.60153	-0.429405	-0.128914	-1.45694	-1.57584	1.11918	0.948166	-0.707375	-1.80563	-1.20585	-1.25034	-0.797451	-2.09035	-2.15887	-0.290752	0.291573	-2.37535	0.623573	0.285004	-1.37185	-1.95137	-3.11832	-0.556755	-2.22646	-2.93348	-0.713455	-1.59019	-2.97252	0.578129	-1.87953	0.699032	-2.81879	-3.10445	-1.07596
	-0.924797	0.305238	0.743587	1.32338	-1.69428	-0.0466042	-0.699215	0.61005	0.185429	3.86826	-0.881367	-0.356857		-0.924797	-0.915366	-3.58375	-0.417187	-0.191772	-1.44893	-1.50281	1.25868	0.978992	-0.613811	-1.79042	-1.2142	-1.2421	-0.706245	-2.11497	-2.12523	-0.185143	0.164482	-2.48084	0.559151	0.299965	-1.30988	-2.07804	-3.11946	-0.647499	-2.18539	-2.89183	-0.769356	-1.57626	-3.08572	0.620361	-1.9291	0.700153	-2.92558	-3.00952	-1.1595
	-0.914557	0.287262	0.735004	1.29184	-1.69238	-0.0934525	-0.669319	0.512569	0.250729	3.80977	-0.881199	-0.390942		-0.914557	-0.92353	-3.51251	-0.378563	-0.224068	-1.3849	-1.45606	1.40799	0.989723	-0.525749	-1.74392	-1.18373	-1.36501	-0.680473	-2.02282	-2.14329	-0.276806	-0.00511169	-2.67588	0.620018	0.283669	-1.21003	-2.19791	-3.16991	-0.723484	-2.16373	-2.87667	-0.794945	-1.56598	-3.12883	0.758598	-1.87226	0.610161	-3.02079	-3.01461	-1.20127
	-0.904317	0.277755	0.794827	1.31943	-1.60664	-0.132542	-0.590698	0.530239	0.164646	3.67103	-0.911037	-0.461704		-0.904317	-0.93789	-3.54091	-0.435139	-0.243961	-1.37244	-1.36451	1.51441	0.928207	-0.365673	-1.81763	-1.191	-1.35966	-0.67786	-2.01583	-2.0423	-0.229298	-0.177002	-2.72682	0.637234	0.31974	-1.1874	-2.17555	-3.12715	-0.879059	-2.17276	-2.93897	-0.793365	-1.60573	-3.05916	0.781834	-1.76214	0.584625	-3.06649	-3.14194	-1.26923
	-0.894077	0.268452	0.860638	1.34882	-1.62452	-0.171047	-0.524216	0.547523	0.0603142	3.57397	-0.958305	-0.428658		-0.894077	-0.945022	-3.49414	-0.512875	-0.201061	-1.34505	-1.33089	1.58238	0.890205	-0.229885	-1.84146	-1.27721	-1.39129	-0.735535	-2.03811	-1.97176	-0.254036	-0.175312	-2.71104	0.603497	0.347603	-1.09256	-2.20593	-3.14944	-0.932384	-2.11335	-3.01385	-0.833523	-1.63017	-3.03049	0.845428	-1.74354	0.619339	-3.09389	-3.06213	-1.29543
	-0.883837	0.248471	0.86182	1.45663	-1.61129	-0.333851	-0.456467	0.53273	0.0370102	3.49916	-1.01241	-0.488621		-0.883837	-0.96078	-3.48457	-0.580585	-0.246037	-1.23372	-1.25188	1.53129	1.00297	-0.229935	-1.82846	-1.35361	-1.37127	-0.877048	-2.14434	-2.01496	-0.195793	-0.176559	-2.57259	0.499271	0.258659	-1.0373	-2.32257	-3.29584	-0.875832	-2.00613	-3.10346	-0.692093	-1.69646	-3.06034	0.900375	-1.68439	0.614998	-3.11721	-3.06173	-1.24982
	-0.873597	0.261264	0.8437	1.52218	-1.59751	-0.24704	-0.513561	0.533302	0.0925484	3.47488	-1.0176	-0.47826		-0.873597	-0.982942	-3.51676	-0.665794	-0.290108	-1.22594	-1.18214	1.43517	1.04718	-0.311497	-1.71999	-1.40543	-1.26311	-0.989975	-2.17416	-2.05107	-0.0754471	-0.172451	-2.4789	0.406494	0.209175	-1.07647	-2.33679	-3.30548	-0.858978	-1.98511	-3.08584	-0.640308	-1.73486	-3.05341	0.938263	-1.57329	0.531376	-3.10257	-3.1982	-1.27487
	-0.863357	0.250694	0.840111	1.56259	-1.6195	-0.243034	-0.463085	0.517567	0.125679	3.39827	-1.15305	-0.458614		-0.863357	-1.00306	-3.59403	-0.757076	-0.419144	-1.31556	-1.1123	1.48663	1.07769	-0.283363	-1.6553	-1.4038	-1.21478	-1.08076	-2.30647	-2.1005	-0.056221	-0.224365	-2.55973	0.338554	0.192642	-1.05541	-2.39893	-3.23301	-0.892792	-1.96391	-3.07499	-0.566208	-1.64807	-3.07497	0.918091	-1.47358	0.367867	-3.09573	-3.34857	-1.22557
	-0.853117	0.229553	0.823635	1.44766	-1.663	-0.265591	-0.433475	0.444683	0.204121	3.39445	-1.22172	-0.435238		-0.853117	-1.00982	-3.58577	-0.785736	-0.432457	-1.28256	-1.11776	1.52843	1.17817	-0.301014	-1.64574	-1.3848	-1.21659	-1.0795	-2.39588	-2.10575	-0.0268326	-0.29081	-2.4734	0.352287	0.146332	-1.07066	-2.42052	-3.17613	-0.949646	-1.87943	-3.07452	-0.601318	-1.62902	-3.17537	1.04669	-1.45544	0.448956	-3.06464	-3.38212	-1.29721
	-0.842877	0.213452	0.821823	1.40565	-1.71849	-0.237423	-0.395576	0.268238	0.217716	3.26369	-1.22455	-0.266567		-0.842877	-1.03046	-3.63959	-0.8806	-0.518253	-1.22989	-1.11131	1.55898	1.18279	-0.227478	-1.70628	-1.37862	-1.34559	-1.18242	-2.24204	-2.23355	0.0519867	-0.378025	-2.53829	0.414894	0.101875	-1.20984	-2.37026	-3.17897	-1.01279	-1.78814	-3.07046	-0.596439	-1.61309	-3.26566	1.12592	-1.48778	0.43708	-3.08808	-3.26114	-1.34378
	-0.832637	0.208311	0.808422	1.4048	-1.77018	-0.218204	-0.360886	0.142567	0.267406	3.21439	-1.25826	-0.146954		-0.832637	-1.04977	-3.70258	-1.03371	-0.569988	-1.18674	-1.10574	1.59218	1.08422	-0.10202	-1.82272	-1.3646	-1.42928	-1.26227	-2.18334	-2.26925	0.138042	-0.430523	-2.60485	0.371098	0.116005	-1.27277	-2.30695	-3.14923	-1.03484	-1.79738	-3.06027	-0.586498	-1.6445	-3.29848	1.15385	-1.53191	0.426422	-3.07201	-3.18311	-1.34881
	-0.822397	0.160834	0.751694	1.32931	-1.79735	-0.18615	-0.354473	0.0317421	0.22728	3.05904	-1.29821	-0.154549		-0.822397	-1.06733	-3.65084	-1.2743	-0.62252	-1.18623	-1.10076	1.65446	0.979794	0.0840302	-1.91084	-1.33722	-1.41053	-1.24832	-2.21944	-2.29347	0.202526	-0.474442	-2.66475	0.258766	0.0429993	-1.28689	-2.30661	-3.19661	-1.02173	-1.7817	-3.12121	-0.680996	-1.61124	-3.34245	1.03874	-1.45402	0.427425	-3.09165	-3.1196	-1.37032
	-0.812157	0.113479	0.676472	1.28939	-1.84727	-0.223736	-0.32896	-0.0215683	0.183552	2.92828	-1.35522	-0.166134		-0.812157	-1.08794	-3.67267	-1.44912	-0.738884	-1.1947	-1.09909	1.64044	0.838303	0.166485	-1.89534	-1.35149	-1.29927	-1.27847	-2.22066	-2.27206	0.245117	-0.447777	-2.67389	0.18214	0.0589027	-1.24219	-2.43276	-3.13311	-0.987152	-1.76347	-3.11245	-0.676598	-1.68111	-3.40633	0.954819	-1.34306	0.364532	-3.16035	-3.01136	-1.39234
	-0.801917	0.0671955	0.601681	1.24918	-1.96655	-0.325687	-0.195606	-0.0152512	0.165184	2.76564	-1.42506	-0.181572		-0.801917	-1.10033	-3.72581	-1.55337	-0.750053	-1.21803	-1.06397	1.55332	0.668823	0.319992	-1.88959	-1.37891	-1.15553	-1.26895	-2.29242	-2.27852	0.319572	-0.515106	-2.75874	0.034153	0.120293	-1.26637	-2.39489	-3.04387	-1.09642	-1.7874	-3.10228	-0.629627	-1.72704	-3.32906	0.894115	-1.32951	0.281044	-3.16351	-2.97437	-1.33136
	-0.791677	0.0678791	0.643715	1.26065	-2.02024	-0.387196	-0.0664635	0.0173988	0.196644	2.66127	-1.57148	-0.0555077		-0.791677	-1.12369	-3.66281	-1.64354	-0.888313	-1.21976	-1.05007	1.48064	0.561569	0.372948	-1.96451	-1.39838	-1.08216	-1.17984	-2.37337	-2.34095	0.364197	-0.569496	-2.75958	-0.122261	0.167393	-1.28854	-2.41363	-3.0175	-1.18827	-1.7972	-3.07597	-0.53561	-1.71889	-3.32273	0.928486	-1.38674	0.227737	-3.0612	-2.99509	-1.30072
	-0.781437	0.0395489	0.664967	1.18174	-2.15457	-0.472012	-0.0222359	-0.0443993	0.289234	2.53296	-1.5932	0.0130119		-0.781437	-1.14123	-3.61917	-1.61769	-0.934864	-1.09168	-1.08216	1.46587	0.504219	0.369904	-1.96842	-1.34224	-1.08925	-1.17484	-2.53671	-2.47817	0.396965	-0.641476	-2.7531	-0.148094	0.20031	-1.31538	-2.41645	-3.00634	-1.18874	-1.79441	-3.054	-0.499226	-1.71085	-3.27307	1.00467	-1.38836	0.278183	-2.97532	-3.01213	-1.39717
	-0.771197	-0.00222321	0.577244	1.13171	-2.29049	-0.461475	0.0225639	-0.148048	0.385723	2.36643	-1.6363	0.030407		-0.771197	-1.16314	-3.54414	-1.67241	-1.06328	-1.09008	-1.12825	1.37948	0.517365	0.408836	-2.05393	-1.40196	-1.12373	-1.18489	-2.64123	-2.54634	0.413441	-0.602844	-2.75363	-0.0786819	0.192261	-1.26167	-2.42542	-2.9693	-1.20599	-1.81919	-3.11389	-0.541164	-1.70532	-3.25685	1.01632	-1.41779	0.357594	-2.90042	-2.98421	-1.45295
	-0.760957	-0.0470116	0.516384	0.959225	-2.29476	-0.53009	0.190098	-0.397961	0.376019	2.2412	-1.72986	0.199635		-0.760957	-1.17999	-3.50835	-1.67207	-1.12034	-1.14517	-1.08643	1.29458	0.481953	0.44043	-2.09557	-1.46643	-1.19939	-1.16394	-2.7613	-2.57757	0.306389	-0.606636	-2.76881	-0.0444298	0.191948	-1.25344	-2.39135	-2.99456	-1.29601	-1.75817	-3.0301	-0.524269	-1.8983	-3.38477	0.985764	-1.4381	0.326336	-2.88813	-2.88697	-1.41016
	-0.750717	-0.106198	0.490517	0.838623	-2.48886	-0.562626	0.258762	-0.590099	0.40266	2.16447	-1.79428	0.218861		-0.750717	-1.19793	-3.47126	-1.86111	-1.14422	-1.1608	-1.03399	1.33554	0.421131	0.439072	-2.07466	-1.48267	-1.22708	-1.12336	-2.76271	-2.66097	0.224995	-0.588547	-2.74792	-0.0491486	0.189316	-1.30897	-2.32236	-2.95575	-1.34052	-1.73057	-2.99297	-0.488007	-2.00429	-3.48966	0.911804	-1.40703	0.355446	-2.95612	-2.73453	-1.39137
	-0.740477	-0.189944	0.470989	0.724586	-2.68846	-0.624851	0.303062	-0.760082	0.298065	1.952	-1.83021	0.255459		-0.740477	-1.21804	-3.39602	-2.12346	-1.16566	-1.23111	-1.11779	1.23868	0.433861	0.415466	-2.0691	-1.57886	-1.10965	-1.09771	-2.65471	-2.7434	0.111427	-0.570251	-2.78382	-0.0713692	0.296543	-1.33854	-2.28671	-2.94402	-1.3586	-1.7179	-2.93304	-0.484303	-2.15397	-3.57412	0.932785	-1.3445	0.333595	-2.90413	-2.739	-1.35241
	-0.730237	-0.255104	0.375935	0.646385	-2.83419	-0.614552	0.400776	-0.846058	0.209351	1.82494	-1.90202	0.188408		-0.730237	-1.23819	-3.41933	-2.21219	-1.26562	-1.2421	-1.12825	1.23459	0.3993	0.398647	-1.99182	-1.58669	-1.07529	-1.17694	-2.63083	-2.70193	0.082695	-0.600601	-2.78814	-0.0262985	0.381397	-1.4024	-2.25826	-2.93277	-1.40384	-1.71776	-2.90085	-0.488235	-2.2848	-3.59314	0.851532	-1.29156	0.308479	-2.89799	-2.78112	-1.42389
	-0.719997	-0.318624	0.16629	0.617252	-2.91584	-0.699669	0.401814	-0.992329	0.22678	1.67273	-1.90467	0.241405		-0.719997	-1.25989	-3.42426	-2.36094	-1.37833	-1.25095	-1.24489	1.16839	0.303307	0.440228	-1.96796	-1.47348	-1.01507	-1.2071	-2.62997	-2.63415	0.108215	-0.637852	-2.84208	-0.0728874	0.412716	-1.26855	-2.35566	-2.83416	-1.43043	-1.77133	-2.86944	-0.5569	-2.26175	-3.58404	0.756882	-1.23232	0.24836	-2.85627	-2.79265	-1.4225
	-0.709757	-0.391121	0.0579681	0.476894	-2.98747	-0.781216	0.36673	-1.1759	0.239094	1.55626	-1.92429	0.260719		-0.709757	-1.28534	-3.55788	-2.42992	-1.42713	-1.20411	-1.3986	1.08528	0.295422	0.448772	-1.94899	-1.43356	-0.992966	-1.19209	-2.60706	-2.65094	0.150265	-0.67308	-2.90519	-0.150429	0.458809	-1.21027	-2.31635	-2.6778	-1.60012	-1.71845	-2.9153	-0.483192	-2.28297	-3.58428	0.805462	-1.17393	0.178955	-2.84705	-2.71082	-1.38066
	-0.699517	-0.482773	-0.0663567	0.369591	-3.10976	-0.953068	0.279015	-1.37998	0.204845	1.48518	-1.9273	0.2701		-0.699517	-1.31631	-3.58509	-2.43909	-1.51409	-1.20173	-1.34332	1.00024	0.167477	0.463142	-2.0124	-1.54539	-0.964165	-1.16306	-2.57421	-2.69301	0.193024	-0.685741	-2.95387	-0.207642	0.558674	-1.22125	-2.45261	-2.57505	-1.62362	-1.80641	-2.83813	-0.429466	-2.31936	-3.60187	0.874603	-1.18781	0.106968	-2.78547	-2.63728	-1.39934
	-0.689277	-0.56095	-0.171009	0.270638	-3.15807	-1.04979	0.181385	-1.55	0.203522	1.39068	-1.94505	0.218185		-0.689277	-1.34249	-3.6531	-2.54955	-1.44424	-1.26456	-1.36023	0.93745	0.0675316	0.42466	-2.04807	-1.46433	-0.88855	-1.11642	-2.54326	-2.66228	0.127243	-0.700462	-2.91088	-0.244049	0.574825	-1.1666	-2.5009	-2.57814	-1.5761	-1.72044	-2.73295	-0.52055	-2.38873	-3.64304	0.883259	-1.22131	0.00576019	-2.87767	-2.64248	-1.34678
	-0.679037	-0.674011	-0.302021	0.135075	-3.34329	-1.20605	0.116413	-1.68697	0.143547	1.24015	-1.96927	0.132305		-0.679037	-1.37078	-3.58633	-2.67842	-1.28778	-1.34623	-1.37806	0.760651	-0.00125122	0.45327	-2.00488	-1.47964	-0.91058	-1.15308	-2.55311	-2.72272	0.122608	-0.792778	-2.8368	-0.241352	0.525177	-1.14021	-2.45996	-2.64301	-1.58036	-1.68914	-2.73219	-0.667583	-2.39332	-3.75835	0.832008	-1.19621	-0.0175591	-2.87365	-2.72006	-1.38665
	-0.668797	-0.746152	-0.402084	-0.0307617	-3.52832	-1.31744	0.0761108	-1.67014	0.0824394	1.03422	-1.90261	0.197063		-0.668797	-1.39997	-3.60263	-2.74557	-1.37278	-1.34433	-1.41998	0.583614	-0.00830078	0.421856	-1.90268	-1.53593	-1.04259	-1.17544	-2.58166	-2.87815	0.141182	-0.878407	-2.92131	-0.228153	0.439846	-1.1897	-2.39669	-2.67499	-1.61146	-1.60104	-2.64244	-0.783566	-2.46409	-3.78532	0.76313	-1.19394	-0.0584259	-2.945	-2.74594	-1.3309
	-0.658557	-0.844395	-0.615196	-0.173763	-3.66987	-1.46921	0.0350571	-1.71885	-0.0340614	0.834568	-1.91383	0.2812		-0.658557	-1.4317	-3.69699	-2.89525	-1.41354	-1.25431	-1.48758	0.438488	-0.00563049	0.450825	-1.8941	-1.53754	-1.1457	-1.27798	-2.55423	-2.95134	0.109169	-0.915039	-2.89857	-0.193439	0.422848	-1.19331	-2.42931	-2.69499	-1.6326	-1.58132	-2.51751	-0.902664	-2.54409	-3.84113	0.72472	-1.18592	-0.0662117	-2.96891	-2.69235	-1.28034
	-0.648317	-0.904619	-0.557095	-0.228992	-3.83709	-1.5212	0.0408974	-1.91995	-0.151257	0.769203	-1.98288	0.342175		-0.648317	-1.45556	-3.74761	-3.02024	-1.41525	-1.15705	-1.59679	0.208755	-0.015213	0.450203	-1.88384	-1.48135	-1.12287	-1.3579	-2.56496	-2.93732	0.0759811	-0.885571	-2.85995	-0.216354	0.435127	-1.1228	-2.43875	-2.65535	-1.65727	-1.6577	-2.537	-0.850307	-2.57121	-3.82923	0.757668	-1.10599	-0.0603943	-2.98572	-2.65954	-1.17435
	-0.638076	-0.947132	-0.315411	-0.355736	-3.92739	-1.70886	0.135216	-2.13652	-0.119129	0.643581	-2.02798	0.340908		-0.638076	-1.48068	-3.7144	-3.13518	-1.41788	-1.18769	-1.53736	0.0643692	-0.0407333	0.417492	-1.89188	-1.40381	-1.05219	-1.38679	-2.55	-3.08927	0.183224	-0.896263	-2.88039	-0.294647	0.44186	-1.10603	-2.39701	-2.70379	-1.65694	-1.5785	-2.5905	-0.7463	-2.71539	-3.84387	0.722504	-1.14875	-0.185467	-2.88441	-2.61065	-1.14325
	-0.627836	-1.03144	-0.462109	-0.512806	-3.97058	-1.83659	0.108799	-2.25676	-0.0679398	0.539669	-2.05901	0.202976		-0.627836	-1.49978	-3.60275	-3.26272	-1.47685	-1.18285	-1.55464	0.016655	-0.108196	0.364254	-1.82808	-1.42146	-0.951195	-1.3906	-2.46991	-3.15297	0.273979	-0.902283	-2.88005	-0.328686	0.42543	-1.10856	-2.32404	-2.70566	-1.62095	-1.49049	-2.60103	-0.661671	-2.74404	-3.88103	0.632538	-1.14544	-0.274086	-2.78529	-2.52112	-1.21387
	-0.617596	-1.13774	-0.823765	-0.759892	-3.97988	-1.98915	-0.00365448	-2.37869	0.00728989	0.501236	-2.13154	0.180634		-0.617596	-1.51343	-3.55389	-3.32946	-1.4761	-1.25847	-1.6476	-0.0343323	-0.191128	0.284241	-1.8067	-1.40823	-0.930798	-1.39848	-2.51332	-3.07522	0.251743	-0.932003	-2.9577	-0.265396	0.350727	-1.04988	-2.24734	-2.70312	-1.63503	-1.42715	-2.5864	-0.606621	-2.79015	-3.7968	0.525593	-1.10701	-0.298893	-2.76439	-2.42965	-1.13645
	-0.607356	-1.27187	-1.18058	-0.991215	-4.04089	-2.15319	-0.192707	-2.50923	0.111324	0.351521	-2.22598	0.112255		-0.607356	-1.53954	-3.53298	-3.32161	-1.42707	-1.42852	-1.73196	-0.15937	-0.311279	0.186035	-1.89542	-1.35108	-0.886475	-1.48315	-2.53173	-2.98579	0.231018	-0.966679	-2.91079	-0.302315	0.23328	-0.934853	-2.23275	-2.72424	-1.63701	-1.48419	-2.58882	-0.523163	-2.85256	-3.74192	0.348518	-1.07303	-0.333416	-2.82844	-2.32575	-1.18492
	-0.597116	-1.38678	-1.47737	-1.20182	-4.12411	-2.1793	-0.288265	-2.74039	0.150509	0.223503	-2.19487	-0.0356712		-0.597116	-1.57165	-3.55114	-3.41068	-1.43597	-1.39991	-1.80884	-0.26976	-0.396336	0.215637	-1.86194	-1.36887	-0.94632	-1.47644	-2.51744	-2.96466	0.199219	-0.939381	-2.94657	-0.308372	0.116219	-0.988258	-2.21127	-2.83578	-1.71478	-1.48281	-2.54431	-0.516178	-2.88366	-3.68855	0.304401	-1.09109	-0.481796	-2.85634	-2.2271	-1.22459
	-0.586876	-1.51075	-1.68026	-1.2523	-4.2911	-2.32867	-0.340324	-2.94216	0.0853157	0.180492	-2.36982	-0.168648		-0.586876	-1.60921	-3.6156	-3.52851	-1.49456	-1.40868	-1.76151	-0.34293	-0.549126	0.157608	-1.89661	-1.42669	-1.03951	-1.52015	-2.54568	-3.01249	0.192856	-0.950493	-2.87819	-0.377167	0.030777	-1.0922	-2.27598	-2.88897	-1.7917	-1.55955	-2.51723	-0.504734	-2.85197	-3.59949	0.245605	-1.10332	-0.54866	-2.98102	-2.15991	-1.31702
	-0.576636	-1.59783	-1.78769	-1.44609	-4.38624	-2.50558	-0.374569	-3.01308	0.0113182	0.181408	-2.44439	-0.213367		-0.576636	-1.64355	-3.67659	-3.62746	-1.63207	-1.44527	-1.76853	-0.481869	-0.57143	0.056694	-1.94422	-1.44185	-1.07008	-1.47038	-2.54736	-3.07893	0.230335	-0.948074	-2.84944	-0.448883	-0.096283	-1.14344	-2.2485	-2.93447	-1.72813	-1.59518	-2.57314	-0.4748	-2.9441	-3.50503	0.183628	-1.02079	-0.612999	-3.07744	-2.13425	-1.38129
	-0.566396	-1.726	-1.96094	-1.65054	-4.48116	-2.64875	-0.480015	-3.06529	-0.125542	0.00336838	-2.51411	-0.336994		-0.566396	-1.6727	-3.62704	-3.70515	-1.79558	-1.44825	-1.76507	-0.637177	-0.644375	0.0100822	-1.96162	-1.57671	-1.15438	-1.46774	-2.50414	-3.15438	0.245632	-0.981651	-2.85567	-0.44545	-0.157906	-1.13888	-2.25354	-2.91474	-1.64573	-1.60959	-2.54419	-0.49268	-3.04289	-3.49117	0.114761	-1.06	-0.764763	-3.13965	-2.16512	-1.38894
	-0.556156	-1.84728	-2.04064	-1.85173	-4.51161	-2.88253	-0.629368	-3.14687	-0.201065	-0.147953	-2.58728	-0.473778		-0.556156	-1.70659	-3.6474	-3.78891	-1.80896	-1.43584	-1.85243	-0.888477	-0.615082	-0.0536575	-1.97075	-1.56815	-1.17885	-1.45079	-2.46147	-3.27556	0.211704	-0.960003	-3.03217	-0.453808	-0.206257	-1.19899	-2.22272	-2.83163	-1.6851	-1.72511	-2.61871	-0.469551	-3.11035	-3.52412	0.0591507	-1.01089	-0.820068	-3.21072	-2.14925	-1.43863
	-0.545916	-1.97258	-2.17246	-2.0882	-4.59555	-3.13564	-0.661579	-3.26579	-0.229721	-0.272686	-2.68889	-0.615231		-0.545916	-1.74764	-3.62756	-3.82491	-1.83475	-1.54902	-1.90977	-1.10668	-0.539661	-0.140289	-2.01713	-1.58984	-1.22726	-1.4752	-2.48144	-3.39506	0.0509377	-0.999771	-3.17453	-0.420216	-0.21254	-1.28257	-2.23137	-2.70774	-1.71834	-1.74392	-2.66719	-0.568272	-3.22012	-3.60988	0.00154877	-1.03004	-0.78373	-3.23994	-2.10359	-1.44767
	-0.535676	-2.12604	-2.37909	-2.39881	-4.6809	-3.37284	-0.714436	-3.41102	-0.321835	-0.33416	-2.83194	-0.815357		-0.535676	-1.77858	-3.7263	-3.76009	-1.82687	-1.66236	-1.9296	-1.26508	-0.56155	-0.133564	-1.97868	-1.62551	-1.32071	-1.55095	-2.40372	-3.42616	-0.133015	-1.04277	-3.19812	-0.510345	-0.238453	-1.3481	-2.27099	-2.68072	-1.69509	-1.71189	-2.71864	-0.71273	-3.2672	-3.70207	0.0273209	-1.01598	-0.743439	-3.15906	-2.14824	-1.49273
	-0.525436	-2.22939	-2.58661	-2.61987	-4.66735	-3.49265	-0.896008	-3.46166	-0.337513	-0.493031	-2.83314	-0.906101		-0.525436	-1.80602	-3.75825	-3.69215	-1.81886	-1.7558	-1.91465	-1.3068	-0.655018	-0.217186	-1.92445	-1.67251	-1.5023	-1.60843	-2.36015	-3.44622	-0.195038	-1.12183	-3.18046	-0.641453	-0.348152	-1.2522	-2.24526	-2.74669	-1.6656	-1.68415	-2.66935	-0.770699	-3.29448	-3.64645	-0.0152473	-1.00801	-0.729073	-3.04572	-2.15777	-1.50144
	-0.515196	-2.36037	-2.80129	-2.81459	-4.68492	-3.65452	-1.01297	-3.57605	-0.429829	-0.723392	-2.88416	-1.022		-0.515196	-1.8342	-3.74792	-3.68563	-1.81943	-1.71461	-1.97978	-1.32401	-0.782444	-0.220039	-1.95771	-1.57713	-1.62135	-1.67755	-2.35249	-3.40817	-0.202801	-1.23027	-3.10836	-0.660923	-0.398685	-1.20568	-2.21513	-2.7942	-1.71259	-1.60065	-2.62256	-0.69828	-3.29168	-3.53244	-0.0430374	-1.00505	-0.884083	-2.99226	-2.15099	-1.52301
	-0.504956	-2.47483	-2.80548	-3.07979	-4.72662	-3.78949	-1.12936	-3.64222	-0.448574	-0.962105	-2.99257	-1.17212		-0.504956	-1.85164	-3.78625	-3.71796	-1.92688	-1.7094	-2.02383	-1.38228	-0.956524	-0.243095	-1.9893	-1.4886	-1.61285	-1.68293	-2.43026	-3.37878	-0.257835	-1.28038	-2.95516	-0.638424	-0.460205	-1.18914	-2.18067	-2.80244	-1.68965	-1.54773	-2.62502	-0.590397	-3.3909	-3.46999	0.0652199	-0.863174	-1.0283	-2.95597	-2.13834	-1.53289
	-0.494716	-2.57327	-2.84994	-3.21373	-4.82235	-3.89686	-1.12809	-3.65196	-0.57996	-1.1604	-3.07408	-1.35534		-0.494716	-1.87502	-3.75314	-3.6945	-1.95824	-1.79101	-2.05997	-1.51433	-1.07186	-0.278625	-2.02418	-1.54548	-1.57106	-1.61942	-2.55758	-3.40999	-0.29224	-1.26485	-2.84591	-0.558842	-0.437096	-1.25202	-2.19665	-2.77116	-1.69258	-1.6409	-2.52912	-0.594986	-3.41502	-3.54667	0.0165443	-0.749115	-1.23383	-2.98782	-2.19623	-1.42236
	-0.484476	-2.68307	-2.93067	-3.45067	-4.8607	-4.06441	-1.15055	-3.69388	-0.708874	-1.3451	-3.11047	-1.51535		-0.484476	-1.89769	-3.742	-3.64238	-1.99216	-1.8399	-1.99249	-1.70377	-1.15343	-0.36248	-1.93499	-1.61785	-1.4956	-1.63715	-2.60472	-3.42528	-0.31691	-1.23554	-2.82463	-0.572041	-0.622749	-1.33915	-2.21776	-2.72764	-1.74394	-1.76166	-2.43116	-0.600231	-3.41436	-3.46154	-0.0352173	-0.692085	-1.31355	-3.04898	-2.19291	-1.42584
	-0.474236	-2.81587	-3.09738	-3.63227	-4.88638	-4.19532	-1.33558	-3.81353	-0.801723	-1.58478	-3.17771	-1.63404		-0.474236	-1.92678	-3.66381	-3.65459	-2.11066	-1.83242	-1.93737	-1.82128	-1.20579	-0.364353	-1.94609	-1.67385	-1.44001	-1.61674	-2.5853	-3.43673	-0.366093	-1.31265	-2.82164	-0.562813	-0.726677	-1.39549	-2.25455	-2.7326	-1.78793	-1.84095	-2.48724	-0.621323	-3.33444	-3.35897	-0.140656	-0.739014	-1.47387	-3.0392	-2.12906	-1.4355
	-0.463996	-2.96667	-3.26645	-3.76139	-4.943	-4.27345	-1.66507	-3.96735	-0.901405	-1.76967	-3.37152	-1.7474		-0.463996	-1.95898	-3.64654	-3.63314	-2.18837	-1.91766	-1.88456	-1.77112	-1.32169	-0.445702	-1.98885	-1.68355	-1.4963	-1.59665	-2.54519	-3.43568	-0.359776	-1.33139	-2.88647	-0.61536	-0.80098	-1.33243	-2.28002	-2.69926	-1.83964	-1.9178	-2.62033	-0.682652	-3.22318	-3.31992	-0.159527	-0.808361	-1.54915	-3.02755	-2.14022	-1.48159
	-0.453756	-3.11106	-3.44581	-3.88292	-4.95323	-4.43262	-1.88171	-4.10048	-0.913601	-1.99474	-3.46159	-2.04385		-0.453756	-2.00217	-3.68899	-3.66016	-2.15282	-1.93668	-1.8633	-1.79456	-1.41996	-0.622013	-1.9785	-1.79199	-1.55119	-1.61944	-2.56405	-3.50267	-0.387012	-1.40078	-2.93094	-0.658325	-0.924194	-1.35298	-2.33201	-2.67743	-1.90175	-1.8978	-2.73376	-0.811077	-3.23399	-3.3072	-0.0625877	-0.816788	-1.63952	-3.04446	-2.27271	-1.56243
	-0.443516	-3.2617	-3.70067	-3.99191	-5.02777	-4.61537	-2.11592	-4.19217	-1.01165	-2.26676	-3.42952	-2.26528		-0.443516	-2.04367	-3.72652	-3.76227	-2.13019	-1.92085	-1.99323	-1.89503	-1.42044	-0.700653	-2.03021	-1.76443	-1.57764	-1.70831	-2.55334	-3.70458	-0.451267	-1.42704	-2.98194	-0.640823	-1.05304	-1.3341	-2.35797	-2.66869	-1.87212	-1.86539	-2.86889	-0.886131	-3.16401	-3.24996	-0.0670547	-0.855434	-1.76665	-2.9866	-2.31971	-1.64602
	-0.433276	-3.38691	-3.92459	-4.16635	-5.0778	-4.65697	-2.28802	-4.22519	-1.15152	-2.4375	-3.45859	-2.48259		-0.433276	-2.07285	-3.70992	-3.84082	-2.12287	-1.98065	-2.13023	-1.92101	-1.3908	-0.789104	-2.13455	-1.7187	-1.56561	-1.72689	-2.5355	-3.74902	-0.439606	-1.44451	-3.02639	-0.67432	-1.03829	-1.41582	-2.28301	-2.62802	-1.74538	-1.88548	-2.94021	-0.847328	-3.17837	-3.17075	-0.158001	-0.900986	-1.90743	-2.97612	-2.33832	-1.72503
	-0.423036	-3.50762	-4.08879	-4.36525	-5.07374	-4.80352	-2.39338	-4.23406	-1.37634	-2.56484	-3.49132	-2.68498		-0.423036	-2.09726	-3.68488	-3.88467	-2.14039	-2.00568	-2.08981	-1.95859	-1.39633	-0.838814	-2.19024	-1.6838	-1.55542	-1.73367	-2.47369	-3.75956	-0.58606	-1.53548	-3.06578	-0.7146	-0.973259	-1.52131	-2.27002	-2.49777	-1.58718	-1.87892	-3.0349	-0.955009	-3.2145	-3.11778	-0.246597	-0.933418	-2.07232	-2.98352	-2.37792	-1.78109
	-0.412796	-3.63062	-4.24862	-4.535	-5.12054	-4.98053	-2.52431	-4.20948	-1.58433	-2.68775	-3.54229	-2.87331		-0.412796	-2.12168	-3.70219	-3.86267	-2.16055	-2.03104	-2.10607	-1.99178	-1.45425	-0.942638	-2.27647	-1.779	-1.60419	-1.65878	-2.45941	-3.66596	-0.632694	-1.57679	-3.05522	-0.6688	-1.10511	-1.56683	-2.3702	-2.40315	-1.59732	-1.84418	-3.0928	-1.04827	-3.20853	-3.09527	-0.222813	-0.956253	-2.10703	-2.91214	-2.416	-1.80083
	-0.402556	-3.71192	-4.37523	-4.62679	-5.20177	-5.02803	-2.5593	-4.1969	-1.6895	-2.79296	-3.62983	-3.01886		-0.402556	-2.15173	-3.73714	-3.79412	-2.21386	-2.02073	-2.03564	-2.11395	-1.45879	-0.917843	-2.22198	-1.88315	-1.69866	-1.72456	-2.42802	-3.70174	-0.681458	-1.76029	-3.06743	-0.69442	-1.18035	-1.59978	-2.45621	-2.40692	-1.72161	-1.88313	-3.10553	-1.10102	-3.19589	-3.0881	-0.231579	-0.986778	-2.1642	-2.82803	-2.34858	-1.80518
	-0.392316	-3.81092	-4.58022	-4.67121	-5.25685	-5.01024	-2.69426	-4.21546	-1.77116	-2.93983	-3.74281	-3.2272		-0.392316	-2.17595	-3.72234	-3.67003	-2.20051	-2.03479	-2.07672	-2.20857	-1.52339	-0.977287	-2.14691	-1.92524	-1.72256	-1.86758	-2.45899	-3.64111	-0.65873	-1.85899	-3.02972	-0.803982	-1.26365	-1.63052	-2.56957	-2.45601	-1.87795	-1.96148	-3.01727	-1.20583	-3.1687	-3.05393	-0.232254	-0.995972	-2.20304	-2.75281	-2.38501	-1.80918
	-0.382076	-3.90787	-4.80822	-4.76128	-5.21038	-5.12403	-2.79278	-4.25256	-1.8904	-3.09184	-3.82278	-3.32442		-0.382076	-2.19817	-3.65708	-3.58045	-2.20591	-2.04669	-2.04128	-2.26103	-1.61275	-1.02995	-2.15639	-1.96364	-1.70203	-1.94676	-2.48273	-3.59743	-0.661209	-1.94577	-3.00112	-0.891006	-1.42806	-1.68568	-2.55513	-2.50824	-1.96513	-2.0911	-2.98728	-1.11598	-3.12618	-3.08461	-0.22345	-1.02868	-2.20488	-2.83553	-2.45134	-1.82618
	-0.371836	-3.9978	-4.90429	-4.88054	-5.19246	-5.2499	-2.89999	-4.27368	-2.02649	-3.22169	-3.91806	-3.4109		-0.371836	-2.21549	-3.65799	-3.55209	-2.17215	-2.01957	-2.09001	-2.28578	-1.69497	-1.14394	-2.12394	-1.97296	-1.79484	-1.98976	-2.48218	-3.61648	-0.604855	-1.91046	-3.12927	-0.881794	-1.5072	-1.68704	-2.49951	-2.51836	-1.8931	-2.18759	-2.92699	-1.08476	-3.03516	-3.12946	-0.195824	-1.01762	-2.29441	-3.0061	-2.46326	-1.88755
	-0.361596	-4.0894	-4.95826	-5.00683	-5.21315	-5.3307	-2.9992	-4.26692	-2.23805	-3.41291	-3.96245	-3.5055		-0.361596	-2.24328	-3.62621	-3.5312	-2.14358	-2.06335	-2.1078	-2.30134	-1.72513	-1.18645	-2.12723	-2.01023	-1.8798	-2.13257	-2.55083	-3.69602	-0.831257	-1.84195	-3.30026	-0.893475	-1.54034	-1.65986	-2.52006	-2.43347	-1.86484	-2.23435	-2.81781	-1.07788	-3.01793	-3.11091	-0.278866	-1.10418	-2.50001	-3.06784	-2.48298	-1.95497
	-0.351356	-4.17166	-5.0578	-5.11459	-5.10099	-5.40508	-3.15708	-4.31898	-2.31337	-3.61183	-3.97676	-3.66012		-0.351356	-2.27199	-3.59912	-3.5555	-2.08508	-2.15736	-2.20161	-2.34553	-1.68399	-1.24141	-2.22845	-1.92276	-1.86483	-2.16056	-2.61482	-3.70925	-0.921593	-1.92184	-3.33255	-0.883224	-1.64795	-1.66291	-2.60911	-2.34281	-1.86687	-2.3664	-2.77413	-1.08817	-3.07413	-3.09635	-0.320152	-1.10592	-2.5636	-3.0701	-2.58346	-2.04643
	-0.341116	-4.26275	-5.15457	-5.16792	-5.14931	-5.47343	-3.32492	-4.39738	-2.48436	-3.66042	-4.04457	-3.77063		-0.341116	-2.3055	-3.60013	-3.64452	-2.20185	-2.26371	-2.21587	-2.46635	-1.69276	-1.25748	-2.24303	-1.83377	-1.90761	-2.04559	-2.65026	-3.77245	-0.932728	-1.93316	-3.29208	-1.03736	-1.612	-1.65137	-2.73709	-2.36119	-1.91922	-2.40675	-2.78344	-1.09918	-3.0829	-3.08496	-0.307072	-1.25948	-2.57623	-3.07573	-2.65645	-2.07218
	-0.330876	-4.36125	-5.17081	-5.31513	-5.05894	-5.57038	-3.48317	-4.47305	-2.73219	-3.78548	-4.05834	-3.965		-0.330876	-2.34098	-3.64077	-3.58237	-2.3041	-2.43388	-2.17138	-2.60112	-1.76047	-1.37197	-2.25888	-1.85919	-1.947	-1.96694	-2.71264	-3.80557	-0.959423	-1.97462	-3.29958	-1.12946	-1.66556	-1.78016	-2.71472	-2.37624	-1.90697	-2.44659	-2.76085	-0.998642	-3.2037	-3.07695	-0.32383	-1.33617	-2.58852	-3.14363	-2.68428	-2.1006
	-0.320636	-4.46119	-5.31383	-5.43729	-5.02636	-5.66375	-3.71261	-4.43762	-2.89205	-3.94345	-4.03274	-4.15217		-0.320636	-2.36094	-3.58838	-3.46249	-2.29166	-2.54629	-2.15851	-2.62432	-1.85611	-1.32946	-2.2262	-1.95245	-1.92604	-1.99757	-2.855	-3.81628	-1.08121	-2.07973	-3.25955	-1.10364	-1.72202	-1.80703	-2.64058	-2.44831	-1.86232	-2.48897	-2.76774	-1.00581	-3.26561	-3.08253	-0.384785	-1.37112	-2.64363	-3.13509	-2.7299	-2.10844
	-0.310396	-4.5858	-5.49994	-5.4952	-5.03343	-5.85478	-3.91726	-4.47048	-3.00895	-4.11707	-4.10677	-4.35413		-0.310396	-2.38031	-3.59881	-3.38956	-2.33706	-2.58194	-2.18779	-2.67226	-1.91077	-1.28425	-2.30205	-2.03731	-1.94653	-2.03506	-2.87761	-3.88866	-1.19858	-2.1506	-3.21093	-1.19012	-1.79157	-1.9025	-2.60558	-2.43548	-1.82532	-2.48979	-2.8988	-1.00241	-3.32652	-3.08093	-0.505459	-1.50174	-2.70477	-3.15565	-2.82169	-2.09442
	-0.300156	-4.71405	-5.69373	-5.64068	-5.02179	-5.8649	-4.11975	-4.53629	-3.18492	-4.35188	-4.15607	-4.57045		-0.300156	-2.40498	-3.60594	-3.33894	-2.3838	-2.55139	-2.12408	-2.73948	-2.05842	-1.2496	-2.35773	-2.10616	-2.07477	-2.13195	-3.01521	-3.90273	-1.26422	-2.1092	-3.13741	-1.18022	-1.80684	-1.99516	-2.61992	-2.37098	-1.89336	-2.50347	-3.11778	-1.07885	-3.39632	-3.09334	-0.623371	-1.59155	-2.73285	-3.14949	-2.83711	-2.00544
	-0.289916	-4.81343	-5.70894	-5.7073	-5.11176	-5.93262	-4.23721	-4.55376	-3.38728	-4.53444	-4.1828	-4.7782		-0.289916	-2.42795	-3.63058	-3.47692	-2.51763	-2.5548	-2.09549	-2.71118	-2.10088	-1.23775	-2.39577	-2.18773	-2.0954	-2.24501	-3.01884	-3.90961	-1.24963	-2.20321	-3.16232	-1.14663	-1.81928	-2.07719	-2.66707	-2.32482	-1.93174	-2.53288	-3.15393	-1.19262	-3.36731	-3.12363	-0.780155	-1.62834	-2.71993	-3.12605	-2.85065	-2.02776
	-0.279676	-4.8716	-5.64767	-5.82015	-5.07902	-5.93561	-4.39867	-4.53263	-3.54252	-4.63966	-4.18621	-4.93383		-0.279676	-2.44715	-3.57001	-3.564	-2.64154	-2.67379	-2.03738	-2.69283	-2.07918	-1.34573	-2.45333	-2.27896	-2.1618	-2.3414	-3.05686	-3.89911	-1.22385	-2.26251	-3.12952	-1.18463	-1.93497	-2.07312	-2.66265	-2.31178	-1.88911	-2.56814	-3.2226	-1.14096	-3.32629	-3.2043	-0.894821	-1.64173	-2.69695	-3.01429	-2.85726	-2.13874
	-0.269436	-4.96257	-5.75197	-5.92226	-5.13299	-5.97986	-4.51168	-4.55903	-3.79313	-4.85881	-4.19876	-4.91718		-0.269436	-2.47038	-3.60006	-3.60144	-2.7123	-2.70721	-2.07103	-2.73473	-2.10088	-1.50057	-2.49869	-2.34788	-2.26615	-2.39377	-3.04116	-3.87791	-1.39415	-2.29534	-3.10081	-1.25594	-2.02854	-2.03234	-2.73936	-2.2496	-1.90211	-2.54183	-3.33899	-1.23564	-3.37107	-3.227	-0.958241	-1.66637	-2.72186	-2.95818	-2.81435	-2.25724
	-0.259196	-5.0269	-5.78104	-6.01341	-5.11329	-6.02973	-4.60769	-4.55357	-3.93962	-4.91069	-4.26469	-5.0553		-0.259196	-2.4954	-3.5659	-3.47234	-2.65777	-2.75346	-2.21839	-2.70687	-2.07701	-1.58844	-2.58484	-2.3254	-2.34134	-2.43941	-3.03923	-3.96901	-1.53961	-2.28858	-3.15169	-1.38551	-2.05569	-2.02476	-2.78833	-2.21725	-1.92994	-2.60208	-3.35482	-1.30117	-3.39338	-3.22554	-0.932514	-1.78839	-2.83933	-2.93156	-2.87574	-2.23034
	-0.248956	-5.11449	-5.6609	-6.15609	-5.11897	-6.17686	-4.79454	-4.54422	-4.02601	-5.12391	-4.35352	-5.1899		-0.248956	-2.52182	-3.55502	-3.42109	-2.59129	-2.70992	-2.26899	-2.6655	-2.08486	-1.77551	-2.62606	-2.30163	-2.34108	-2.48107	-3.04237	-3.95382	-1.53654	-2.3599	-3.2562	-1.49903	-2.08386	-2.06928	-2.79182	-2.25337	-1.89978	-2.78185	-3.2579	-1.46394	-3.28378	-3.21826	-1.00734	-1.94293	-2.9214	-2.85218	-2.85423	-2.10562
	-0.238715	-5.19782	-5.625	-6.25392	-5.15362	-6.19038	-4.87141	-4.57753	-4.20304	-5.30781	-4.48595	-5.30955		-0.238715	-2.54646	-3.59145	-3.47556	-2.55759	-2.77866	-2.17431	-2.71641	-2.04072	-1.77513	-2.65045	-2.24774	-2.3301	-2.48438	-2.87014	-4.0058	-1.61772	-2.38462	-3.34815	-1.54693	-2.14153	-2.07552	-2.77493	-2.33127	-1.86037	-2.82872	-3.21859	-1.51473	-3.25278	-3.21398	-1.08619	-2.06605	-2.98784	-2.85734	-2.81747	-2.02657
	-0.228475	-5.28918	-5.71955	-6.27157	-5.18826	-6.18275	-4.87268	-4.77217	-4.33587	-5.51354	-4.52035	-5.51506		-0.228475	-2.57555	-3.58675	-3.53315	-2.65263	-2.92131	-2.24624	-2.80887	-2.10162	-1.8212	-2.67041	-2.16796	-2.29005	-2.51823	-2.82236	-4.05045	-1.75914	-2.4702	-3.31752	-1.60125	-2.11578	-2.07701	-2.80109	-2.45219	-1.86842	-2.85715	-3.2799	-1.56425	-3.17639	-3.23933	-1.04694	-2.21281	-3.01013	-2.91621	-2.69912	-1.93873
	-0.218235	-5.36619	-5.90869	-6.30538	-5.17413	-6.16072	-4.91496	-4.93521	-4.48228	-5.5491	-4.62414	-5.60729		-0.218235	-2.6057	-3.61285	-3.54698	-2.79076	-3.03085	-2.29774	-2.91262	-2.18761	-1.85998	-2.7642	-2.18606	-2.31186	-2.53391	-2.83132	-4.0308	-1.88083	-2.54514	-3.27049	-1.72267	-2.18599	-2.06697	-2.83929	-2.55699	-1.95428	-2.96684	-3.33076	-1.73126	-3.27123	-3.23606	-0.966312	-2.28596	-2.95017	-3.00348	-2.6536	-1.89498
	-0.207995	-5.41114	-5.91768	-6.39736	-5.10534	-6.22961	-5.00907	-5.0504	-4.47336	-5.62352	-4.59312	-5.7119		-0.207995	-2.6466	-3.68584	-3.60542	-2.80197	-3.10518	-2.41783	-2.98337	-2.12376	-1.93797	-2.78536	-2.35999	-2.36535	-2.63958	-2.8313	-4.05419	-1.90631	-2.55506	-3.20689	-1.87236	-2.25111	-2.06392	-2.85908	-2.69149	-1.99775	-3.02787	-3.26758	-1.78441	-3.44241	-3.30139	-1.02252	-2.38792	-3.00239	-2.95835	-2.73435	-1.88337
	-0.197755	-5.48469	-5.94856	-6.38061	-5.07238	-6.32471	-5.14856	-5.11096	-4.58596	-5.7788	-4.67447	-5.82187		-0.197755	-2.68601	-3.70031	-3.70464	-2.84383	-3.16919	-2.44392	-3.01048	-1.98622	-2.01644	-2.79195	-2.50225	-2.41805	-2.736	-2.90401	-4.08373	-1.92435	-2.49058	-3.29467	-1.95366	-2.23713	-2.08841	-2.80174	-2.69917	-1.93535	-3.0198	-3.28868	-1.84722	-3.61383	-3.33492	-1.09638	-2.47034	-3.03624	-3.00935	-2.81986	-1.91978
	-0.187515	-5.5317	-5.9599	-6.2884	-5.07537	-6.38025	-5.22493	-5.14149	-4.72612	-5.90494	-4.7252	-5.8904		-0.187515	-2.72224	-3.69766	-3.64925	-2.80848	-3.21825	-2.48435	-3.00935	-1.95747	-2.06277	-2.76969	-2.56446	-2.57055	-2.87142	-3.03019	-4.12669	-1.97807	-2.57428	-3.38941	-1.97874	-2.28954	-2.08524	-2.81065	-2.66558	-1.84887	-3.01292	-3.32482	-1.87581	-3.73821	-3.36913	-1.09	-2.50778	-3.08435	-3.05379	-2.89872	-2.0571
	-0.177275	-5.56551	-5.881	-6.27593	-5.09611	-6.38186	-5.43564	-5.20538	-4.86025	-5.89603	-4.66114	-5.9617		-0.177275	-2.7439	-3.72951	-3.64413	-2.85548	-3.26458	-2.54085	-3.05549	-1.98331	-2.16861	-2.74635	-2.58511	-2.60947	-2.86579	-3.04816	-4.09308	-2.04213	-2.59965	-3.42765	-1.99704	-2.3357	-2.06557	-2.83748	-2.6011	-1.86067	-3.10598	-3.25399	-1.91669	-4.07401	-3.31006	-1.27534	-2.61732	-3.12099	-3.13766	-2.84841	-2.12098
	-0.167035	-5.57919	-5.92766	-6.25964	-5.15014	-6.2321	-5.5164	-5.22185	-4.97572	-5.86645	-4.61849	-6.02346		-0.167035	-2.76716	-3.68531	-3.53976	-2.90424	-3.24973	-2.62867	-3.18992	-2.02998	-2.25707	-2.71541	-2.59469	-2.5587	-2.89581	-3.09552	-4.10899	-2.17418	-2.59106	-3.4346	-2.02275	-2.35262	-2.04408	-2.96997	-2.6006	-1.95884	-3.10112	-3.1916	-1.97964	-4.27275	-3.19252	-1.43028	-2.75934	-3.12961	-3.1893	-2.82542	-2.18509
	-0.156795	-5.60604	-5.98932	-6.2521	-5.12333	-6.17272	-5.51103	-5.20045	-5.10405	-5.91404	-4.65252	-6.14084		-0.156795	-2.77894	-3.74343	-3.47812	-2.99299	-3.30301	-2.632	-3.1926	-2.17994	-2.24369	-2.68377	-2.67985	-2.51981	-2.92507	-3.17445	-4.06593	-2.1799	-2.61523	-3.35887	-2.07013	-2.34373	-2.0844	-2.6949	-2.61131	-2.02922	-3.13659	-3.17815	-2.03077	-4.1776	-3.16405	-1.54391	-2.86281	-3.09392	-3.16621	-2.86555	-2.16587
	-0.146555	-5.66963	-6.08744	-6.33392	-5.10835	-6.15049	-5.62564	-5.26989	-5.23433	-5.9817	-4.72453	-6.18003		-0.146555	-2.7883	-3.80457	-3.53707	-3.00162	-3.39651	-2.63661	-3.1891	-2.23046	-2.16724	-2.72623	-2.752	-2.48629	-2.84585	-3.23101	-4.11718	-2.11652	-2.60514	-3.34502	-2.20347	-2.4493	-1.95364	-2.35503	-2.62119	-2.08648	-3.19512	-3.2142	-2.15464	-4.09154	-3.14928	-1.63961	-2.92789	-3.06696	-3.07365	-2.87907	-2.17765
	-0.136315	-5.71968	-6.20353	-6.37716	-5.06023	-6.22062	-5.61246	-5.30041	-5.41934	-5.98647	-4.86564	-6.15093		-0.136315	-2.81305	-3.91203	-3.66726	-3.0952	-3.45914	-2.62778	-3.13845	-2.20931	-2.17982	-2.84354	-2.71292	-2.406	-2.85827	-3.18311	-4.16599	-2.21149	-2.67089	-3.4989	-2.2769	-2.52018	-1.95781	-2.38283	-2.70126	-2.09136	-3.21712	-3.16573	-2.16323	-3.96362	-3.12988	-1.76141	-2.90281	-3.16779	-3.13861	-2.93179	-2.20941
	-0.126075	-5.74831	-6.16806	-6.40963	-4.97292	-6.26035	-5.69597	-5.39029	-5.50338	-5.94932	-4.86728	-6.26593		-0.126075	-2.84386	-3.95683	-3.75436	-3.15763	-3.5826	-2.65186	-3.17152	-2.27246	-2.2199	-2.88593	-2.70189	-2.43124	-2.91369	-3.1044	-4.25284	-2.29341	-2.64717	-3.51777	-2.26705	-2.52236	-2.06666	-2.54728	-2.76311	-2.16747	-3.29965	-3.2285	-2.1301	-3.84232	-3.20481	-1.76025	-2.91791	-3.18682	-3.07175	-2.97523	-2.31744
	-0.115835	-5.78308	-6.13688	-6.50724	-5.04939	-6.35999	-5.67733	-5.417	-5.50374	-5.91911	-4.90516	-6.35494		-0.115835	-2.87183	-4.03529	-3.83004	-3.18531	-3.68649	-2.64053	-3.25458	-2.24611	-2.25823	-2.89875	-2.77229	-2.47772	-2.87437	-3.0049	-4.30944	-2.26382	-2.67419	-3.43314	-2.31376	-2.50027	-2.20855	-2.85426	-2.8392	-2.24002	-3.27684	-3.24603	-2.16277	-3.77623	-3.28226	-1.73885	-3.01052	-3.15376	-3.08223	-2.97992	-2.31799
	-0.105595	-5.82564	-6.07433	-6.58949	-5.11738	-6.34333	-5.70176	-5.51017	-5.53138	-5.96996	-4.9858	-6.43283		-0.105595	-2.89207	-3.96083	-3.89648	-3.22634	-3.712	-2.70845	-3.24474	-2.20926	-2.29464	-2.91198	-2.81046	-2.53198	-2.87887	-2.95356	-4.35838	-2.3147	-2.62199	-3.46887	-2.34317	-2.57859	-2.31969	-2.9502	-2.88747	-2.23994	-3.25008	-3.21009	-2.25867	-3.84439	-3.33244	-1.81628	-3.07544	-3.12026	-3.20108	-3.07924	-2.23453
	-0.0953551	-5.85186	-6.10456	-6.55867	-5.16555	-6.32141	-5.76159	-5.58752	-5.56686	-6.04029	-4.9654	-6.44676		-0.0953551	-2.91157	-3.96944	-3.97234	-3.2323	-3.71313	-2.70132	-3.27877	-2.15469	-2.34743	-2.92556	-2.87704	-2.52514	-2.92071	-3.04958	-4.32316	-2.40322	-2.65466	-3.50941	-2.27031	-2.70728	-2.3504	-3.06219	-2.99752	-2.08574	-3.21344	-3.29993	-2.39092	-3.90845	-3.31435	-1.91492	-3.19935	-3.06509	-3.24578	-3.1282	-2.2122
	-0.0851151	-5.88579	-6.11166	-6.54673	-5.19344	-6.38669	-5.81402	-5.60451	-5.62146	-6.13957	-4.98877	-6.45107		-0.0851151	-2.94255	-4.06165	-4.02871	-3.25965	-3.66024	-2.6816	-3.36174	-2.16589	-2.3844	-2.94075	-2.97447	-2.54491	-2.95668	-3.19278	-4.29719	-2.4652	-2.74923	-3.50038	-2.31432	-2.77902	-2.39984	-3.1689	-3.0873	-2.00764	-3.22986	-3.39757	-2.54754	-3.99335	-3.28783	-2.01114	-3.27909	-3.069	-3.28982	-3.16373	-2.30064
	-0.0748751	-5.8985	-6.10594	-6.5257	-5.152	-6.44832	-5.82405	-5.61172	-5.62362	-6.16739	-4.958	-6.56828		-0.0748751	-2.97813	-4.10374	-4.01671	-3.19653	-3.70902	-2.59477	-3.43199	-2.15154	-2.4498	-2.91751	-3.08157	-2.67451	-3.07384	-3.22319	-4.31926	-2.4627	-2.90328	-3.49837	-2.38863	-2.86277	-2.47283	-3.16314	-3.06903	-2.00243	-3.20411	-3.41621	-2.70771	-4.04441	-3.2893	-2.18176	-3.3031	-3.08118	-3.21399	-3.15367	-2.31123
	-0.064635	-5.91392	-6.07072	-6.48146	-5.25806	-6.52237	-5.92775	-5.56509	-5.65549	-6.11299	-4.91585	-6.62939		-0.064635	-3.00182	-4.18444	-3.98445	-3.19839	-3.78965	-2.64814	-3.4148	-2.23752	-2.43346	-2.98939	-3.06083	-2.78774	-3.15217	-3.10235	-4.3007	-2.60131	-3.04402	-3.61633	-2.36797	-2.91486	-2.4329	-3.15189	-3.02604	-1.97809	-3.13548	-3.41549	-2.70966	-3.98756	-3.31694	-2.22892	-3.28407	-3.07596	-3.17305	-3.21594	-2.40062
	-0.054395	-5.93859	-6.0251	-6.49799	-5.25413	-6.51353	-6.01993	-5.6049	-5.71218	-6.15355	-4.92684	-6.67778		-0.054395	-3.02411	-4.12911	-3.96076	-3.30759	-3.86398	-2.71664	-3.41665	-2.3594	-2.44986	-3.09816	-3.13786	-2.8148	-3.18877	-3.09528	-4.38462	-2.60802	-3.14748	-3.61374	-2.27924	-2.94166	-2.46328	-3.14384	-3.0366	-1.95346	-3.21706	-3.42984	-2.70586	-4.12048	-3.43703	-2.25068	-3.30849	-3.15113	-3.12122	-3.21102	-2.43937
	-0.044155	-5.93733	-6.05294	-6.49461	-5.30891	-6.50423	-6.02716	-5.58151	-5.67261	-6.18314	-4.8945	-6.65371		-0.044155	-3.0328	-4.09978	-3.94756	-3.34275	-3.87481	-2.83364	-3.39171	-2.36164	-2.44213	-3.18546	-3.19748	-2.82124	-3.19016	-3.1564	-4.3973	-2.49746	-3.25171	-3.53748	-2.27157	-2.97884	-2.40524	-3.15113	-3.0498	-2.04996	-3.24257	-3.38161	-2.73598	-4.12028	-3.48726	-2.32914	-3.35399	-3.10958	-3.19004	-3.1919	-2.4536
	-0.033915	-5.96573	-6.08902	-6.50644	-5.35468	-6.49357	-6.02752	-5.63842	-5.7248	-6.13778	-4.94873	-6.73632		-0.033915	-3.05083	-3.99362	-3.85848	-3.35064	-3.80981	-2.74962	-3.27402	-2.34026	-2.43553	-3.29188	-3.2665	-2.82675	-3.31605	-3.2616	-4.40858	-2.4346	-3.22999	-3.5174	-2.31746	-3.04568	-2.38624	-3.11673	-3.08616	-2.11555	-3.31231	-3.31047	-2.8561	-4.07804	-3.57698	-2.3311	-3.35906	-3.15144	-3.19587	-3.16149	-2.43441
	-0.0236749	-6.01978	-6.16096	-6.59994	-5.36558	-6.46254	-6.14802	-5.67539	-5.72163	-6.15617	-5.04272	-6.86487		-0.0236749	-3.06136	-4.01122	-3.92245	-3.35058	-3.73544	-2.75076	-3.22034	-2.41676	-2.46611	-3.32289	-3.30763	-2.72083	-3.43318	-3.22282	-4.40493	-2.48905	-3.12151	-3.47941	-2.3768	-3.13517	-2.4099	-3.0903	-2.99662	-2.06634	-3.28251	-3.36447	-2.9073	-4.06232	-3.52254	-2.3641	-3.30644	-3.17381	-3.19808	-3.12759	-2.41031
	-0.0134349	-6.09009	-6.24873	-6.72212	-5.4151	-6.53075	-6.29566	-5.70911	-5.75088	-6.23608	-5.07069	-6.92182		-0.0134349	-3.07129	-3.9867	-3.99964	-3.4974	-3.77312	-2.73229	-3.13733	-2.40887	-2.56079	-3.26392	-3.30038	-2.73049	-3.47201	-3.16363	-4.39992	-2.53917	-3.06192	-3.56303	-2.46447	-3.16987	-2.46363	-3.14155	-2.99847	-2.02636	-3.32192	-3.37554	-2.96792	-4.0294	-3.42674	-2.34839	-3.17586	-3.16947	-3.28589	-3.19373	-2.38553
	-0.00319489	-6.13322	-6.26675	-6.7994	-5.44929	-6.5777	-6.38443	-5.73415	-5.825	-6.24572	-5.08357	-6.96614		-0.00319489	-3.0796	-4.03808	-3.9795	-3.51079	-3.82436	-2.74287	-3.14821	-2.37872	-2.63592	-3.26462	-3.21336	-2.64161	-3.48354	-3.17643	-4.42857	-2.53276	-2.98971	-3.63109	-2.46087	-3.18692	-2.44163	-3.13218	-2.94555	-1.97275	-3.35841	-3.40209	-2.95171	-4.01748	-3.43501	-2.35378	-3.20042	-3.1644	-3.23467	-3.18416	-2.37831
	0.00704514	-6.08323	-6.23652	-6.78321	-5.32357	-6.49184	-6.36927	-5.73059	-5.70501	-6.23575	-5.01109	-6.94542		0.00704514	-3.07242	-3.99836	-3.93403	-3.47308	-3.90449	-2.82023	-3.221	-2.34235	-2.72483	-3.28679	-3.03977	-2.53604	-3.50522	-3.13437	-4.45701	-2.52469	-2.93864	-3.61926	-2.47116	-3.14026	-2.41855	-3.1087	-2.92131	-1.90967	-3.42662	-3.50628	-2.92667	-3.89779	-3.38376	-2.30043	-3.26656	-3.20468	-3.23335	-3.17516	-2.39332
	0.0172852	-6.00858	-6.16636	-6.7705	-5.28973	-6.37973	-6.26336	-5.7146	-5.60631	-6.10255	-4.99798	-6.79465		0.0172852	-3.06296	-3.99924	-3.94741	-3.50014	-4.03739	-2.77621	-3.35067	-2.33629	-2.74459	-3.27871	-2.9677	-2.56136	-3.40633	-3.12252	-4.41874	-2.61207	-2.89773	-3.68364	-2.52302	-3.08671	-2.38861	-3.09001	-2.89038	-1.86864	-3.3961	-3.62587	-3.10996	-3.889	-3.38259	-2.32629	-3.35159	-3.26205	-3.23392	-3.19049	-2.37864
	0.0275252	-5.96287	-6.08838	-6.68373	-5.28556	-6.29576	-6.28983	-5.68882	-5.55945	-6.06273	-4.98102	-6.69345		0.0275252	-3.05423	-4.10148	-3.95723	-3.41902	-4.02485	-2.75104	-3.36829	-2.34681	-2.82193	-3.30074	-2.99889	-2.60123	-3.40629	-3.12057	-4.37871	-2.63208	-2.98901	-3.72591	-2.54689	-3.1334	-2.37561	-2.99673	-2.85834	-1.87533	-3.32321	-3.65232	-3.16689	-3.89355	-3.39724	-2.28267	-3.37292	-3.26608	-3.22528	-3.11366	-2.43429
	0.0377652	-5.95217	-6.10641	-6.70325	-5.26722	-6.29249	-6.24982	-5.66793	-5.5483	-6.10744	-4.90655	-6.67223		0.0377652	-3.05039	-4.13629	-3.97208	-3.35168	-3.98846	-2.75955	-3.38287	-2.38013	-2.78581	-3.27111	-3.0583	-2.67644	-3.35074	-3.14871	-4.38173	-2.60302	-2.95988	-3.66563	-2.59486	-3.07458	-2.26783	-2.91834	-2.88919	-1.94684	-3.37551	-3.55443	-3.08125	-3.85657	-3.3844	-2.23573	-3.3866	-3.27506	-3.34276	-3.00954	-2.43702
	0.0480052	-5.93746	-6.138	-6.58545	-5.34653	-6.25419	-6.15905	-5.59811	-5.53251	-6.15657	-4.94378	-6.66038		0.0480052	-3.03417	-4.21496	-4.00815	-3.30974	-4.00577	-2.74356	-3.35186	-2.38543	-2.64207	-3.20211	-3.04237	-2.68955	-3.37051	-3.13733	-4.36752	-2.51003	-2.95044	-3.63548	-2.53194	-3.0411	-2.21923	-2.88995	-2.86646	-2.03328	-3.41543	-3.47313	-3.00691	-3.89383	-3.45006	-2.20294	-3.35524	-3.1909	-3.39071	-3.02476	-2.32078
	0.0582453	-5.94266	-6.13414	-6.48276	-5.35804	-6.26417	-6.17823	-5.65464	-5.63444	-6.08526	-4.97129	-6.66362		0.0582453	-3.01103	-4.21632	-3.99953	-3.32728	-3.95554	-2.70454	-3.28532	-2.38801	-2.48494	-3.14634	-2.97254	-2.67059	-3.32931	-3.16668	-4.38102	-2.41066	-2.87143	-3.60063	-2.41418	-3.03886	-2.23527	-2.86472	-2.87601	-2.07622	-3.41714	-3.53333	-2.92485	-3.9093	-3.44798	-2.17084	-3.27876	-3.22144	-3.3042	-3.03381	-2.30303
	0.0684853	-5.96172	-6.17618	-6.49422	-5.29392	-6.30359	-6.15681	-5.71478	-5.78082	-6.17046	-4.99328	-6.53318		0.0684853	-2.98225	-4.12906	-3.97537	-3.35134	-3.96703	-2.65464	-3.30682	-2.39198	-2.33865	-3.18363	-2.93118	-2.61653	-3.30022	-3.26436	-4.40164	-2.42709	-2.81025	-3.54913	-2.24142	-3.01843	-2.21752	-2.88499	-2.87249	-2.05447	-3.30135	-3.38985	-2.94135	-3.94849	-3.3978	-2.09347	-3.18885	-3.18957	-3.25111	-2.93827	-2.22516
	0.0787253	-5.94459	-6.15234	-6.50697	-5.15236	-6.24269	-6.12569	-5.71889	-5.74809	-6.21138	-5.05515	-6.53238		0.0787253	-2.94804	-4.06469	-3.97221	-3.29232	-3.85705	-2.57085	-3.31968	-2.34454	-2.11504	-3.11165	-2.90926	-2.59637	-3.30505	-3.38966	-4.34269	-2.36581	-2.66402	-3.61084	-2.18442	-2.91438	-2.21074	-2.99274	-2.8635	-1.95547	-3.16867	-3.35034	-2.85696	-3.92657	-3.33198	-2.15829	-3.14236	-3.13977	-3.18554	-2.88607	-2.1797
	0.0889653	-5.94275	-6.0795	-6.49794	-5.21223	-6.37757	-6.11289	-5.64178	-5.65523	-6.20765	-5.07444	-6.5683		0.0889653	-2.9265	-4.12655	-3.96339	-3.21325	-3.77863	-2.54611	-3.33678	-2.30416	-1.99638	-3.05616	-2.89731	-2.59844	-3.26476	-3.36155	-4.26576	-2.27834	-2.55504	-3.68834	-2.1791	-2.93076	-2.07574	-3.05065	-3.00861	-2.00361	-3.05551	-3.29456	-2.74831	-3.9775	-3.264	-2.22483	-3.17985	-3.17791	-2.92053	-2.88852	-2.1129
	0.0992054	-5.91987	-6.05037	-6.48384	-5.18793	-6.41161	-6.14329	-5.54489	-5.61877	-6.22057	-5.00031	-6.53707		0.0992054	-2.90055	-4.06711	-3.89342	-3.18221	-3.69579	-2.58781	-3.33532	-2.25814	-2.09149	-2.89885	-3.00664	-2.58477	-3.21275	-3.28339	-4.17408	-2.25423	-2.54692	-3.5647	-2.13676	-2.93117	-2.08266	-2.97611	-3.06063	-1.99144	-2.94856	-3.24733	-2.63928	-3.91899	-3.21443	-2.26379	-3.17605	-3.21632	-2.77386	-2.86172	-2.04408
	0.109445	-5.91323	-6.08645	-6.49229	-5.20398	-6.48355	-6.09494	-5.52502	-5.60182	-6.22633	-4.90233	-6.51559		0.109445	-2.87311	-4.05477	-3.87279	-3.08681	-3.7151	-2.63413	-3.36906	-2.25072	-2.16037	-2.8954	-2.97599	-2.54348	-3.0452	-3.1927	-4.09309	-2.29061	-2.5603	-3.55588	-2.21577	-2.93175	-2.0283	-2.9054	-2.98722	-1.98565	-2.96359	-3.24126	-2.6733	-3.87363	-3.1224	-2.16613	-3.1112	-3.19477	-2.79272	-2.84132	-2.02055
	0.119685	-5.85702	-5.97085	-6.41697	-5.11643	-6.51222	-6.08441	-5.52675	-5.52789	-6.15245	-4.79452	-6.46773		0.119685	-2.84323	-4.08904	-3.9124	-2.99931	-3.73979	-2.68569	-3.3645	-2.17515	-2.16308	-2.97945	-2.85162	-2.50148	-2.93331	-3.1755	-4.10738	-2.34863	-2.50125	-3.51451	-2.33419	-2.9469	-2.05116	-2.81246	-2.86893	-1.86198	-2.99625	-3.21422	-2.59365	-3.82122	-3.09833	-2.08396	-3.18426	-3.1319	-2.74649	-2.87082	-1.94965
	0.129925	-5.80885	-5.91768	-6.40964	-5.07587	-6.48788	-6.17881	-5.47282	-5.44557	-6.02204	-4.73619	-6.34202		0.129925	-2.81816	-4.09623	-3.86875	-2.98525	-3.72257	-2.64109	-3.28269	-2.1274	-2.16071	-3.00191	-2.75943	-2.6078	-2.76443	-3.13118	-4.13469	-2.38705	-2.47767	-3.44986	-2.43144	-2.93792	-1.95599	-2.80408	-2.87795	-1.89061	-2.9095	-3.2058	-2.45248	-3.89175	-3.12894	-2.00913	-3.1323	-3.06219	-2.78146	-2.82178	-1.93021
	0.140165	-5.76783	-5.88798	-6.27683	-5.06324	-6.44434	-6.18744	-5.48579	-5.46025	-5.87992	-4.70329	-6.28921		0.140165	-2.7889	-3.9842	-3.84021	-3.01228	-3.61403	-2.56723	-3.2059	-2.11905	-2.19341	-3.02995	-2.54996	-2.60688	-2.62867	-3.19718	-4.15223	-2.35883	-2.42887	-3.39296	-2.47427	-2.91932	-1.82487	-2.74194	-2.87527	-1.86444	-2.81658	-3.13593	-2.30603	-4.02141	-3.07456	-2.04375	-3.08043	-3.06586	-2.77164	-2.7225	-1.86692
	0.150406	-5.72285	-5.82136	-6.2492	-5.01632	-6.40358	-6.16138	-5.45203	-5.40568	-5.75371	-4.65459	-6.31062		0.150406	-2.74972	-4.07587	-3.77014	-2.88167	-3.52581	-2.54129	-3.03576	-2.09869	-2.16592	-2.98884	-2.51237	-2.58675	-2.60881	-3.19429	-4.19884	-2.30981	-2.36639	-3.35935	-2.40358	-2.75179	-1.76016	-2.71734	-2.78416	-1.77848	-2.77036	-2.9992	-2.26307	-4.029	-3.01783	-2.04444	-2.96224	-3.00205	-2.8102	-2.68646	-1.83485
	0.160646	-5.68959	-5.81898	-6.15769	-5.05108	-6.35124	-6.15161	-5.47065	-5.31719	-5.73057	-4.56179	-6.28506		0.160646	-2.72051	-4.09055	-3.64182	-2.82369	-3.46698	-2.50546	-3.03	-2.08458	-2.12019	-2.98673	-2.49432	-2.58506	-2.61565	-3.15187	-4.14333	-2.30118	-2.30318	-3.4103	-2.29378	-2.58551	-1.65344	-2.72513	-2.71619	-1.73577	-2.71078	-2.95391	-2.30415	-4.09344	-2.8979	-2.02296	-2.94187	-2.96764	-2.81366	-2.67532	-1.7244
	0.170886	-5.66881	-5.81289	-6.42447	-5.0989	-6.2512	-6.18641	-5.41758	-5.15316	-5.74321	-4.39874	-6.20159		0.170886	-2.67942	-3.94304	-3.51015	-2.86942	-3.4737	-2.51878	-3.03305	-2.06422	-2.10922	-3.034	-2.53199	-2.49704	-2.5859	-2.8312	-4.16711	-2.34817	-2.2326	-3.38493	-2.19047	-2.50972	-1.64231	-2.72265	-2.64046	-1.58107	-2.64407	-2.98309	-2.13436	-4.09062	-2.87305	-1.99214	-2.92968	-2.97587	-2.67161	-2.61088	-1.61355
	0.181126	-5.66043	-5.84524	-6.6461	-5.24906	-6.16848	-6.20536	-5.37065	-5.07766	-5.70316	-4.31173	-6.02683		0.181126	-2.64263	-3.81012	-3.52198	-2.84506	-3.45869	-2.54009	-3.07634	-2.03978	-2.19109	-3.00203	-2.68182	-2.33563	-2.51225	-2.50193	-4.10258	-2.34433	-2.18631	-3.2981	-2.20728	-2.48792	-1.756	-2.66855	-2.64314	-1.5524	-2.64795	-2.98534	-1.99908	-4.04099	-2.81075	-1.80581	-2.81742	-2.9263	-2.47997	-2.57488	-1.50983
	0.191366	-5.61766	-5.77266	-6.47748	-5.27751	-6.16375	-6.20462	-5.39792	-5.04707	-5.7102	-4.21484	-5.91051		0.191366	-2.608	-3.73862	-3.47092	-2.88363	-3.46313	-2.53686	-3.09459	-1.98274	-2.20522	-2.99216	-2.81874	-2.20157	-2.41629	-2.55996	-4.02749	-2.28969	-2.18676	-3.28853	-2.23924	-2.52536	-1.70602	-2.66199	-2.64064	-1.42775	-2.62514	-2.97438	-1.97277	-4.01359	-2.8033	-1.69526	-2.79468	-2.85564	-2.4093	-2.54822	-1.42234
	0.201606	-5.58268	-5.73238	-6.22235	-5.32024	-6.15865	-6.1796	-5.36683	-5.10314	-5.71791	-4.19551	-5.83017		0.201606	-2.58217	-3.70206	-3.42773	-2.85526	-3.41331	-2.47844	-3.10966	-1.97183	-2.13483	-3.01603	-2.85138	-2.1154	-2.2599	-2.74361	-4.02144	-2.22751	-2.12501	-3.27514	-2.23287	-2.48588	-1.69506	-2.60433	-2.64986	-1.37466	-2.58878	-3.00356	-1.99629	-3.89677	-2.80376	-1.6827	-2.79006	-2.76134	-2.39401	-2.50142	-1.36127
	0.211846	-5.52272	-5.67303	-5.94734	-5.33057	-6.11156	-6.01387	-5.40598	-5.19625	-5.70806	-4.04947	-5.79106		0.211846	-2.56067	-3.66325	-3.39087	-2.72797	-3.41821	-2.37527	-3.08948	-2.06654	-2.06487	-3.0941	-2.83933	-1.9743	-2.0435	-2.88375	-4.0265	-2.16832	-2.0995	-3.23837	-2.29221	-2.45825	-1.78167	-2.54941	-2.592	-1.31479	-2.49368	-3.1117	-2.04499	-3.86655	-2.79486	-1.72806	-2.9129	-2.72026	-2.37394	-2.47941	-1.34021
	0.222086	-5.5065	-5.63372	-5.83966	-5.29462	-6.09367	-6.02443	-5.4607	-5.18053	-5.76068	-3.96526	-5.81172		0.222086	-2.53465	-3.7947	-3.3336	-2.67852	-3.37657	-2.17691	-3.12014	-2.17117	-1.94999	-3.16008	-2.78598	-1.88847	-1.93412	-2.95587	-4.16385	-2.07513	-2.08653	-3.32	-2.26682	-2.41354	-1.81592	-2.45843	-2.52266	-1.18302	-2.3657	-2.9778	-2.10323	-3.88802	-2.82521	-1.7803	-2.97369	-2.77713	-2.47412	-2.39767	-1.26772
	0.232326	-5.48435	-5.67311	-5.71006	-5.15915	-6.07615	-6.02934	-5.5111	-5.11831	-5.82393	-3.96148	-5.78086		0.232326	-2.49525	-3.81091	-3.39048	-2.58032	-3.38123	-2.05134	-3.09096	-2.13101	-1.82495	-3.11271	-2.69752	-1.83678	-1.83469	-3.02909	-4.13017	-2.01421	-2.09225	-3.35929	-2.17223	-2.4533	-1.79838	-2.46133	-2.4451	-1.0132	-2.23446	-2.90954	-1.97675	-3.7468	-2.85209	-1.76681	-3.02333	-2.74791	-2.59567	-2.3676	-1.19124
	0.242566	-5.45515	-5.7304	-5.49881	-5.07722	-6.01973	-6.02618	-5.56069	-5.12937	-5.86629	-3.93584	-5.70694		0.242566	-2.46234	-3.84702	-3.35445	-2.45422	-3.39831	-1.94291	-3.08224	-2.00518	-1.67712	-3.10854	-2.6412	-1.72535	-1.7484	-3.07174	-4.09193	-1.94057	-2.1035	-3.34232	-2.04234	-2.47332	-1.71685	-2.54402	-2.48432	-0.886703	-2.1265	-2.97585	-1.86037	-3.70519	-2.83104	-1.84181	-2.90187	-2.70213	-2.63005	-2.37162	-1.16608
	0.252806	-5.3822	-5.73133	-5.42733	-5.00058	-5.90599	-5.99684	-5.50417	-5.02872	-5.82138	-3.84426	-5.56141		0.252806	-2.43227	-3.80652	-3.27908	-2.33012	-3.26419	-1.89773	-3.10552	-1.96496	-1.53489	-3.07748	-2.55657	-1.62712	-1.64214	-3.09215	-4.13322	-1.99852	-2.07242	-3.39347	-1.97306	-2.44799	-1.60666	-2.55773	-2.43055	-0.761593	-2.13521	-3.00632	-1.82417	-3.62423	-2.82823	-1.86174	-2.80104	-2.68972	-2.63727	-2.27032	-1.10059
	0.263046	-5.3328	-5.72359	-5.35366	-4.93325	-5.84717	-5.9803	-5.55626	-5.01869	-5.70798	-3.78784	-5.41925		0.263046	-2.40287	-3.75407	-3.17529	-2.4099	-3.19532	-1.93775	-3.16486	-2.00577	-1.51174	-3.04858	-2.51591	-1.60128	-1.6459	-3.06466	-4.15582	-2.06496	-2.05084	-3.44417	-2.00923	-2.47639	-1.47437	-2.65588	-2.32785	-0.672112	-1.99219	-3.02279	-1.65483	-3.53043	-2.84703	-1.80359	-2.77549	-2.64106	-2.77206	-2.22614	-1.04486
	0.273286	-5.29705	-5.71481	-5.38633	-4.94739	-5.74302	-5.91988	-5.50972	-4.94224	-5.68604	-3.82648	-5.29459		0.273286	-2.36535	-3.77026	-3.19852	-2.45941	-3.07296	-1.87248	-3.21815	-2.0285	-1.55559	-2.90752	-2.49523	-1.60001	-1.66808	-3.01168	-4.2324	-1.9775	-1.94629	-3.32247	-1.96902	-2.5192	-1.29727	-2.66113	-2.2389	-0.602711	-1.78555	-2.98959	-1.50671	-3.40484	-2.83752	-1.79015	-2.76777	-2.61594	-2.75532	-2.18101	-1.02718
	0.283526	-5.25476	-5.67672	-5.39508	-5.02788	-5.66431	-5.77217	-5.42656	-4.92288	-5.62871	-3.77062	-5.26265		0.283526	-2.33423	-3.7742	-3.07932	-2.46896	-2.94753	-1.7978	-3.15648	-1.98167	-1.60232	-2.88371	-2.39806	-1.52953	-1.62876	-3.01383	-4.26197	-1.89491	-1.82854	-3.2235	-1.94777	-2.53718	-1.16464	-2.62699	-2.25734	-0.579811	-1.66586	-2.95979	-1.60992	-3.34142	-2.69895	-1.75231	-2.80969	-2.50688	-2.68532	-2.24322	-1.01699
	0.293766	-5.22425	-5.61383	-5.29285	-4.99214	-5.62038	-5.77777	-5.32455	-5.03717	-5.55304	-3.69755	-5.33323		0.293766	-2.29831	-3.74649	-3.00227	-2.5133	-2.92109	-1.82204	-3.03065	-1.8581	-1.5602	-2.97637	-2.38885	-1.41074	-1.49403	-3.03556	-4.17999	-1.81318	-1.83362	-3.14391	-1.89648	-2.37807	-1.09385	-2.60123	-2.2894	-0.532448	-1.55326	-2.84737	-1.65973	-3.29716	-2.63758	-1.78493	-2.71922	-2.31944	-2.69687	-2.24041	-0.922943
	0.304006	-5.18253	-5.58484	-5.16677	-4.91191	-5.61331	-5.84644	-5.38758	-4.95292	-5.51899	-3.52634	-5.31617		0.304006	-2.2608	-3.73915	-2.998	-2.49045	-3.0112	-1.79448	-3.00304	-1.8319	-1.51596	-3.05772	-2.40877	-1.23558	-1.23429	-2.93181	-4.15852	-1.85018	-1.75248	-3.03474	-1.84087	-2.25127	-1.11068	-2.57304	-2.24841	-0.345993	-1.52654	-2.86618	-1.65101	-3.2058	-2.65079	-1.82016	-2.64374	-2.22795	-2.69542	-2.22465	-0.795567
	0.314246	-5.13797	-5.594	-5.01427	-4.79877	-5.49189	-5.81249	-5.43417	-4.93904	-5.48333	-3.50679	-5.30499		0.314246	-2.22412	-3.66914	-2.92316	-2.42143	-3.15028	-1.78688	-2.92561	-1.88626	-1.43845	-3.08678	-2.44758	-1.1488	-1.09819	-2.8567	-4.2504	-1.75006	-1.71285	-3.01503	-1.83939	-2.27727	-1.0404	-2.57957	-2.20076	-0.321438	-1.57972	-2.86392	-1.54979	-3.07986	-2.68518	-1.75523	-2.6031	-2.24078	-2.71402	-2.2648	-0.775555
	0.324486	-5.0914	-5.49304	-4.90864	-4.75262	-5.3834	-5.78987	-5.50132	-4.88964	-5.35639	-3.58783	-5.25128		0.324486	-2.18349	-3.61983	-2.77823	-2.34903	-3.19947	-1.72377	-2.96956	-1.89577	-1.38105	-3.14137	-2.37404	-1.02634	-0.955879	-2.818	-4.30075	-1.695	-1.70856	-3.13882	-1.73586	-2.31858	-1.01122	-2.44256	-2.24791	-0.285366	-1.53601	-2.65802	-1.51406	-2.98253	-2.60404	-1.68452	-2.66373	-2.17815	-2.75663	-2.27474	-0.849464
	0.334726	-5.04301	-5.33241	-4.87181	-4.6918	-5.41932	-5.7638	-5.46585	-4.81978	-5.28999	-3.60078	-5.17458		0.334726	-2.15198	-3.65487	-2.79973	-2.25671	-3.18576	-1.77937	-2.90199	-1.81859	-1.40549	-3.1749	-2.32719	-0.855339	-0.852478	-2.80846	-4.24881	-1.71241	-1.74392	-3.18235	-1.65681	-2.3166	-1.00403	-2.42691	-2.26151	-0.219204	-1.45975	-2.63845	-1.53247	-2.92266	-2.55275	-1.62047	-2.69526	-2.21418	-2.70322	-2.18721	-0.725399
	0.344966	-5.00152	-5.16557	-4.79206	-4.65839	-5.46478	-5.7237	-5.54546	-4.8232	-5.1942	-3.6426	-5.00521		0.344966	-2.12015	-3.67294	-2.7494	-2.23571	-3.10802	-1.76088	-2.81875	-1.71846	-1.40849	-3.06964	-2.31135	-0.807121	-0.75412	-2.7644	-4.25237	-1.77583	-1.78046	-3.09073	-1.6523	-2.31147	-0.996735	-2.44967	-2.2475	-0.200546	-1.44231	-2.76105	-1.50462	-2.81631	-2.48788	-1.66811	-2.72363	-2.14552	-2.76371	-2.145	-0.691784
	0.355206	-4.95119	-5.10419	-4.76099	-4.57147	-5.35473	-5.74979	-5.54009	-4.7339	-5.20653	-3.65506	-4.83519		0.355206	-2.08951	-3.67368	-2.66516	-2.25407	-3.03371	-1.60738	-2.70012	-1.75026	-1.36432	-3.03122	-2.34089	-0.889122	-0.61797	-2.73942	-4.2295	-1.83887	-1.80899	-3.12898	-1.53838	-2.39097	-0.971676	-2.44322	-2.23316	-0.114571	-1.45243	-2.83697	-1.45958	-2.70326	-2.35992	-1.60968	-2.65775	-2.12119	-2.76287	-2.22024	-0.631836
	0.365446	-4.90523	-5.11981	-4.72923	-4.47454	-5.26673	-5.73816	-5.51825	-4.69703	-5.17215	-3.59182	-4.74457		0.365446	-2.06376	-3.68745	-2.66584	-2.29958	-3.01149	-1.58006	-2.71865	-1.73481	-1.3774	-3.13224	-2.22279	-0.858166	-0.475845	-2.72546	-4.23095	-1.83292	-1.81725	-3.1246	-1.40699	-2.49535	-0.920013	-2.37603	-2.16302	-0.0180511	-1.39799	-2.77856	-1.46836	-2.67623	-2.27962	-1.60344	-2.69032	-2.11809	-2.89258	-2.16068	-0.600914
	0.375686	-4.87972	-5.08553	-4.71101	-4.35897	-5.30826	-5.75371	-5.37706	-4.67052	-5.17104	-3.61515	-4.7459		0.375686	-2.02097	-3.61493	-2.6806	-2.39261	-2.95012	-1.46198	-2.73489	-1.73466	-1.35964	-3.18657	-2.20231	-0.818432	-0.371864	-2.71751	-4.26839	-1.76164	-1.71863	-3.13018	-1.28966	-2.52183	-0.923763	-2.30923	-2.0388	0.131226	-1.30771	-2.78167	-1.39624	-2.61169	-2.21342	-1.50366	-2.65249	-2.05302	-2.98639	-2.14249	-0.611866
	0.385926	-4.85581	-4.98977	-4.77287	-4.32002	-5.25674	-5.71628	-5.37172	-4.63242	-5.21677	-3.58073	-4.70075		0.385926	-1.98623	-3.60472	-2.57899	-2.38866	-2.96842	-1.4469	-2.65783	-1.62549	-1.27075	-3.1355	-2.24265	-0.852428	-0.203812	-2.67485	-4.2264	-1.69408	-1.61309	-3.04425	-1.2195	-2.58069	-0.894989	-2.25941	-1.88787	0.249493	-1.22801	-2.85748	-1.33062	-2.6042	-2.23331	-1.40264	-2.63826	-2.09942	-3.08713	-2.06479	-0.602058
	0.396166	-4.81399	-4.79123	-4.79415	-4.32829	-5.14348	-5.61269	-5.41075	-4.63409	-5.1999	-3.62287	-4.60247		0.396166	-1.9627	-3.57442	-2.4232	-2.37643	-2.99857	-1.53271	-2.64589	-1.58646	-1.1449	-3.04253	-2.23416	-0.81699	-0.156818	-2.62868	-4.1551	-1.65665	-1.54579	-2.95942	-1.24016	-2.57996	-0.938179	-2.25426	-1.84325	0.213573	-1.20144	-2.87321	-1.25126	-2.50273	-2.18361	-1.41133	-2.6474	-2.11702	-3.13983	-1.96785	-0.676144
	0.406406	-4.76357	-4.81209	-4.72662	-4.23545	-5.06824	-5.45591	-5.42951	-4.62101	-5.14961	-3.68252	-4.4548		0.406406	-1.94316	-3.50493	-2.33806	-2.42411	-2.9121	-1.54767	-2.70504	-1.58031	-1.16849	-2.98791	-2.33027	-0.749901	-0.0983963	-2.67937	-4.19127	-1.60909	-1.48673	-2.98921	-1.20258	-2.47698	-1.05106	-2.21185	-1.85004	0.177929	-1.22712	-2.77322	-1.27989	-2.50001	-2.14608	-1.4488	-2.64107	-2.05668	-3.10674	-2.01675	-0.64328
	0.416646	-4.72756	-4.83988	-4.62297	-4.15639	-5.0737	-5.39698	-5.45469	-4.63101	-5.08936	-3.63937	-4.37125		0.416646	-1.92242	-3.41397	-2.39654	-2.38086	-2.81588	-1.47987	-2.76798	-1.69364	-1.22421	-2.84331	-2.37732	-0.779976	-0.0175476	-2.71171	-4.17321	-1.60213	-1.44628	-2.90757	-1.0934	-2.36152	-1.08118	-2.291	-1.86807	0.228657	-1.28933	-2.64442	-1.41397	-2.53996	-2.09947	-1.48457	-2.6609	-1.98669	-3.02725	-2.03849	-0.512505
	0.426886	-4.67373	-4.76667	-4.55495	-4.05448	-5.01556	-5.44144	-5.39518	-4.60056	-4.99071	-3.58731	-4.33045		0.426886	-1.90398	-3.36581	-2.35113	-2.4906	-2.83066	-1.42292	-2.71481	-1.74543	-1.22198	-2.76145	-2.41239	-0.769318	0.151836	-2.57728	-4.1558	-1.57972	-1.34866	-2.97659	-0.980545	-2.29647	-1.01999	-2.33444	-1.88085	0.315845	-1.37011	-2.58136	-1.43682	-2.52792	-2.08537	-1.45715	-2.60707	-1.92647	-2.98167	-2.14671	-0.51149
	0.437126	-4.63095	-4.67456	-4.58559	-4.05167	-5.01378	-5.44363	-5.37104	-4.52293	-4.87191	-3.53196	-4.24241		0.437126	-1.88901	-3.30625	-2.30353	-2.60315	-2.79948	-1.38463	-2.60677	-1.79056	-1.25415	-2.80004	-2.42541	-0.731113	0.212658	-2.56879	-4.21899	-1.54247	-1.34345	-2.86594	-0.946617	-2.24935	-1.00963	-2.3258	-1.95115	0.35741	-1.27981	-2.58395	-1.48251	-2.4895	-1.99107	-1.44273	-2.45421	-1.87992	-2.94919	-2.19033	-0.624466
	0.447366	-4.61456	-4.65392	-4.59605	-4.05834	-4.99115	-5.464	-5.39432	-4.44866	-4.80219	-3.53585	-4.20108		0.447366	-1.85703	-3.3103	-2.29607	-2.60345	-2.72136	-1.26413	-2.56081	-1.76989	-1.25755	-2.7421	-2.3537	-0.68029	0.25222	-2.55044	-4.31794	-1.49022	-1.24479	-2.80408	-0.909378	-2.23466	-0.851883	-2.39848	-1.88013	0.446953	-1.23096	-2.64984	-1.54994	-2.42282	-1.84709	-1.42936	-2.45521	-1.84296	-2.9747	-2.22155	-0.655796
	0.457606	-4.56807	-4.70818	-4.54177	-3.92497	-4.89896	-5.48658	-5.40398	-4.33265	-4.76215	-3.55581	-4.06564		0.457606	-1.82992	-3.27893	-2.18455	-2.54936	-2.59266	-1.2355	-2.54003	-1.75853	-1.20851	-2.7141	-2.34208	-0.66391	0.343559	-2.49706	-4.30149	-1.44904	-1.08229	-2.76418	-0.841797	-2.25451	-0.783756	-2.43317	-1.83176	0.455963	-1.22873	-2.64554	-1.54055	-2.37907	-1.7168	-1.33737	-2.57193	-1.66729	-2.96786	-2.18272	-0.717354
	0.467846	-4.51076	-4.58936	-4.57231	-3.99633	-4.85048	-5.35095	-5.31445	-4.19292	-4.67342	-3.55693	-4.01048		0.467846	-1.79588	-3.18394	-2.11893	-2.53902	-2.555	-1.2427	-2.55273	-1.76485	-1.13776	-2.68359	-2.30382	-0.705101	0.348915	-2.49812	-4.2588	-1.41071	-0.927937	-2.81146	-0.677158	-2.29691	-0.820957	-2.40413	-1.82303	0.449036	-1.20345	-2.63511	-1.41322	-2.15342	-1.68452	-1.24823	-2.59586	-1.47305	-2.86238	-2.11845	-0.691902
	0.478086	-4.45407	-4.4882	-4.48824	-3.98823	-4.78164	-5.27219	-5.33876	-4.19809	-4.57748	-3.45014	-3.95779		0.478086	-1.76811	-3.19978	-1.89114	-2.51087	-2.46518	-1.26933	-2.4897	-1.76154	-1.12802	-2.66317	-2.31475	-0.708607	0.471043	-2.51174	-4.27886	-1.42373	-0.762974	-2.75246	-0.533081	-2.40429	-0.932156	-2.35913	-1.7598	0.411152	-1.20546	-2.58914	-1.38141	-2.08636	-1.69598	-1.25769	-2.55412	-1.28987	-2.86863	-2.11945	-0.691257
	0.488326	-4.41095	-4.48678	-4.37097	-3.9244	-4.77186	-5.2095	-5.30482	-4.26346	-4.51947	-3.35988	-3.8984		0.488326	-1.74316	-3.21838	-1.79566	-2.49892	-2.3717	-1.35734	-2.4495	-1.73299	-1.09122	-2.59298	-2.32753	-0.774052	0.525963	-2.40173	-4.23455	-1.50628	-0.700912	-2.61176	-0.445663	-2.3829	-0.990417	-2.27439	-1.67947	0.384758	-1.15566	-2.55309	-1.39722	-2.13869	-1.74034	-1.28938	-2.46912	-1.22856	-2.97237	-2.11227	-0.726639
	0.498566	-4.35126	-4.46933	-4.36741	-3.87979	-4.69748	-5.13437	-5.24319	-4.16383	-4.48335	-3.2713	-3.80259		0.498566	-1.71547	-3.14026	-1.78572	-2.54271	-2.28648	-1.31505	-2.35477	-1.734	-1.06601	-2.59159	-2.31921	-0.779785	0.597157	-2.34516	-4.23034	-1.59491	-0.481487	-2.48854	-0.414085	-2.39034	-1.06701	-2.14365	-1.55027	0.419662	-1.23451	-2.54996	-1.41443	-2.0185	-1.76822	-1.31312	-2.48135	-1.1531	-3.04576	-2.11361	-0.763596
	0.508806	-4.29428	-4.41026	-4.39455	-3.75436	-4.63749	-5.04129	-5.22876	-4.07444	-4.35298	-3.30731	-3.74134		0.508806	-1.69107	-3.0283	-1.81847	-2.51693	-2.22488	-1.2606	-2.32304	-1.73849	-1.13257	-2.5652	-2.32459	-0.782097	0.651573	-2.30961	-4.11781	-1.63225	-0.275002	-2.36713	-0.34827	-2.42863	-1.20391	-2.08273	-1.50233	0.498817	-1.37988	-2.54661	-1.4417	-1.91939	-1.69394	-1.35718	-2.51072	-1.02769	-3.14063	-2.01904	-0.685513
	0.519046	-4.23213	-4.30378	-4.31934	-3.68511	-4.59639	-5.0164	-5.22693	-3.97435	-4.22872	-3.34441	-3.62586		0.519046	-1.66062	-2.91231	-1.70241	-2.50416	-2.19709	-1.30639	-2.28519	-1.75359	-1.13118	-2.59874	-2.34557	-0.772694	0.617718	-2.21151	-4.03055	-1.47895	-0.174431	-2.27829	-0.323273	-2.38501	-1.29527	-2.03513	-1.4207	0.516571	-1.36897	-2.48373	-1.48979	-1.80814	-1.55714	-1.37967	-2.4551	-0.961197	-3.18229	-1.93661	-0.651131
	0.529287	-4.21595	-4.23787	-4.404	-3.6665	-4.49267	-5.00727	-5.15138	-3.87745	-4.25619	-3.37656	-3.68961		0.529287	-1.63285	-2.85132	-1.64164	-2.45271	-2.19281	-1.24805	-2.30378	-1.78068	-1.12093	-2.57202	-2.32767	-0.670532	0.546738	-1.93568	-3.96439	-1.39797	-0.0385284	-2.23249	-0.171616	-2.31193	-1.39225	-2.054	-1.44568	0.518417	-1.39023	-2.34177	-1.48526	-1.73106	-1.47634	-1.36975	-2.35717	-0.876034	-3.16467	-1.94308	-0.583229
	0.539527	-4.20265	-4.17748	-4.40252	-3.77963	-4.46176	-5.00628	-5.10559	-3.75041	-4.32016	-3.39569	-3.62695		0.539527	-1.61861	-2.85081	-1.53153	-2.47384	-2.36248	-1.22699	-2.27807	-1.81453	-1.10874	-2.62838	-2.20448	-0.678471	0.460876	-1.89455	-3.78059	-1.27256	0.110996	-2.26116	-0.0800476	-2.28431	-1.39282	-2.13082	-1.50113	0.502678	-1.45979	-2.19484	-1.46576	-1.62243	-1.4499	-1.39326	-2.34139	-0.865852	-3.1637	-1.96847	-0.574173
	0.549767	-4.14047	-4.18859	-4.33731	-3.73911	-4.37674	-4.88652	-5.08839	-3.60697	-4.34574	-3.29476	-3.54055		0.549767	-1.60254	-2.79773	-1.42053	-2.54806	-2.49112	-1.1825	-2.19438	-1.79986	-1.04268	-2.70276	-2.27774	-0.727905	0.375389	-1.87991	-3.66012	-1.25338	0.22298	-2.17761	-0.0470276	-2.26837	-1.44204	-2.0891	-1.47305	0.565304	-1.47846	-2.11802	-1.49532	-1.57484	-1.37513	-1.44197	-2.30165	-0.730549	-3.15543	-1.89471	-0.596146
	0.560007	-4.08869	-4.25652	-4.26556	-3.68469	-4.33048	-4.7937	-5.02216	-3.52667	-4.34047	-3.18359	-3.48309		0.560007	-1.58566	-2.82611	-1.32133	-2.61152	-2.55926	-1.11404	-2.13092	-1.67474	-1.01498	-2.68561	-2.37846	-0.72303	0.32663	-1.92089	-3.64626	-1.23377	0.386738	-2.15336	-0.0756378	-2.31304	-1.49466	-2.20591	-1.45397	0.706802	-1.41578	-2.19407	-1.54901	-1.62235	-1.26904	-1.4616	-2.23635	-0.792538	-3.17898	-1.81071	-0.633633
	0.570247	-4.06504	-4.19342	-4.25276	-3.61792	-4.3939	-4.76974	-5.01789	-3.41131	-4.39734	-3.22489	-3.37128		0.570247	-1.56405	-2.76427	-1.26508	-2.54834	-2.62505	-1.06763	-2.06555	-1.55419	-1.04579	-2.65784	-2.37411	-0.755001	0.282181	-1.8621	-3.58735	-1.11145	0.568306	-2.11129	-0.100517	-2.2878	-1.52217	-2.42962	-1.34917	0.810303	-1.41858	-2.13605	-1.36219	-1.50822	-1.29138	-1.50249	-2.24259	-0.780083	-3.12787	-1.82038	-0.682461
	0.580487	-4.03341	-4.12746	-4.27898	-3.55738	-4.38072	-4.79782	-4.95604	-3.26832	-4.41671	-3.29496	-3.25571		0.580487	-1.54586	-2.6496	-1.23413	-2.44141	-2.56004	-1.07619	-2.05205	-1.5834	-1.06583	-2.52777	-2.31319	-0.707306	0.149464	-1.79801	-3.50345	-1.06042	0.691364	-2.00609	-0.0374107	-2.23611	-1.49069	-2.52972	-1.25706	0.719975	-1.44353	-2.10005	-1.40308	-1.40635	-1.19554	-1.54055	-2.27689	-0.668941	-3.13651	-1.92789	-0.691879
	0.590727	-4.02065	-4.14219	-4.2339	-3.50555	-4.37786	-4.7735	-4.89651	-3.21747	-4.3734	-3.40353	-3.28261		0.590727	-1.52781	-2.68239	-1.14261	-2.44404	-2.48622	-0.977089	-2.03179	-1.58935	-1.10794	-2.41709	-2.27371	-0.80415	0.195946	-1.83757	-3.43063	-1.15682	0.754616	-2.02197	-0.0479088	-2.1329	-1.56049	-2.55197	-1.24335	0.736137	-1.39778	-2.11189	-1.46146	-1.35279	-1.07365	-1.52536	-2.31515	-0.597252	-3.19002	-1.9385	-0.685776
	0.600967	-4.0055	-4.11155	-4.17232	-3.43874	-4.27638	-4.68346	-4.9302	-3.33124	-4.32497	-3.47046	-3.31568		0.600967	-1.51383	-2.70568	-1.0908	-2.41102	-2.39836	-0.92572	-1.984	-1.41754	-1.20244	-2.3279	-2.27142	-0.90815	0.315655	-1.80987	-3.39619	-1.05382	0.810265	-2.04586	-0.0957108	-2.11245	-1.63835	-2.56233	-1.18296	0.79641	-1.39227	-2.1045	-1.49396	-1.37546	-0.930988	-1.52958	-2.3418	-0.547672	-3.22839	-1.83299	-0.625351
	0.611207	-3.94584	-4.06441	-4.05145	-3.35005	-4.07526	-4.62742	-4.93332	-3.33876	-4.2425	-3.49437	-3.28086		0.611207	-1.48491	-2.68651	-0.999199	-2.46263	-2.38258	-0.837456	-1.92382	-1.42138	-1.16265	-2.31932	-2.24625	-0.947987	0.392841	-1.77546	-3.35191	-0.936867	0.875057	-1.98186	-0.080658	-2.14439	-1.6936	-2.52784	-1.10002	0.837387	-1.46037	-2.03037	-1.47636	-1.37862	-0.737099	-1.41562	-2.32254	-0.520218	-3.19976	-1.75713	-0.55888
	0.621447	-3.89462	-4.04164	-3.9863	-3.24541	-3.96659	-4.57624	-4.93582	-3.23086	-4.19237	-3.54292	-3.22803		0.621447	-1.45453	-2.66202	-1.09785	-2.49122	-2.26825	-0.720001	-1.81668	-1.41731	-1.0793	-2.34497	-2.18311	-0.904976	0.373089	-1.67471	-3.27328	-0.928558	0.873302	-1.92938	-0.126339	-2.24825	-1.74569	-2.57404	-0.950111	0.872776	-1.44561	-1.99572	-1.37647	-1.40901	-0.647404	-1.34106	-2.1847	-0.439011	-3.13773	-1.69207	-0.520706
	0.631687	-3.85933	-4.09466	-3.95196	-3.23938	-3.8505	-4.5018	-4.98038	-3.22656	-4.1485	-3.45646	-3.14312		0.631687	-1.43556	-2.4933	-1.1961	-2.4215	-2.1849	-0.716244	-1.87417	-1.39061	-1.10016	-2.29271	-2.23322	-0.839451	0.344467	-1.66906	-3.16274	-0.809109	0.970806	-1.85157	-0.262558	-2.24239	-1.79849	-2.61546	-0.853477	0.937172	-1.44957	-1.93926	-1.34116	-1.37415	-0.624382	-1.29743	-2.15986	-0.403679	-3.15514	-1.61597	-0.493347
	0.641927	-3.83117	-4.05872	-4.04657	-3.21079	-3.89272	-4.42914	-4.99046	-3.12124	-4.03792	-3.40303	-3.12114		0.641927	-1.4196	-2.36001	-1.15997	-2.43743	-2.1861	-0.71447	-1.8008	-1.36961	-1.14631	-2.27361	-2.20281	-0.929691	0.193787	-1.61906	-3.07237	-0.813057	1.07412	-1.82119	-0.219238	-2.32051	-1.75847	-2.67377	-0.836422	1.07557	-1.41271	-1.94255	-1.31924	-1.2799	-0.578606	-1.25698	-2.21125	-0.346626	-3.17365	-1.59769	-0.470451
	0.652167	-3.77196	-3.93155	-4.08881	-3.07483	-3.90886	-4.32077	-4.94354	-2.94056	-3.90318	-3.43984	-3.16768		0.652167	-1.40962	-2.27988	-1.09516	-2.49065	-2.21802	-0.711372	-1.69448	-1.36171	-1.24544	-2.22388	-2.13186	-0.921093	0.0875854	-1.55282	-2.96854	-0.897537	1.24938	-1.79208	-0.195896	-2.28332	-1.72359	-2.64104	-0.732933	1.06163	-1.29507	-1.85375	-1.32703	-1.20227	-0.6045	-1.29696	-2.14183	-0.335934	-3.13312	-1.62719	-0.3582
	0.662407	-3.71557	-3.82786	-4.17669	-2.95779	-3.93899	-4.22578	-4.86182	-2.80561	-3.78593	-3.38307	-3.1921		0.662407	-1.40077	-2.18681	-0.947224	-2.60271	-2.20864	-0.618492	-1.61312	-1.33241	-1.25323	-2.20216	-2.13283	-0.975014	0.0926476	-1.43026	-2.80393	-0.932194	1.37118	-1.78624	-0.260124	-2.30832	-1.8091	-2.62149	-0.74781	0.990604	-1.2362	-1.83567	-1.28057	-1.09903	-0.70565	-1.24626	-2.05476	-0.382141	-3.10875	-1.64228	-0.223694
	0.672647	-3.65689	-3.72384	-4.15993	-2.911	-3.95137	-4.07191	-4.75572	-2.68105	-3.85675	-3.31851	-3.13879		0.672647	-1.38571	-2.1947	-0.802734	-2.60569	-2.12201	-0.616768	-1.54174	-1.27126	-1.36909	-2.21492	-2.06176	-1.05287	0.0165596	-1.34283	-2.68348	-0.952866	1.4084	-1.78038	-0.293602	-2.35987	-1.79464	-2.58671	-0.722111	1.0811	-1.16969	-1.77019	-1.27747	-1.15985	-0.718834	-1.32437	-2.01765	-0.408897	-2.94607	-1.54693	-0.123703
	0.682887	-3.62358	-3.62643	-4.16533	-2.86747	-3.92952	-3.95958	-4.73645	-2.70246	-3.93917	-3.28697	-3.02238		0.682887	-1.35691	-2.26612	-0.750877	-2.57495	-2.06071	-0.568951	-1.43473	-1.18716	-1.38761	-2.14542	-1.9558	-1.14227	0.00755692	-1.29493	-2.47632	-0.884727	1.43735	-1.79583	-0.298168	-2.35322	-1.67631	-2.50607	-0.713097	1.17923	-1.12888	-1.75279	-1.20147	-1.16321	-0.655235	-1.28343	-1.90601	-0.459324	-2.90118	-1.55113	-0.0536804
	0.693127	-3.61092	-3.5613	-4.12261	-2.81754	-3.96133	-3.93163	-4.72363	-2.69242	-3.95146	-3.31145	-3.03582		0.693127	-1.32535	-2.32649	-0.844242	-2.52503	-1.98134	-0.621368	-1.32769	-1.16067	-1.38477	-2.06384	-1.87327	-1.17744	0.0192642	-1.21417	-2.35351	-0.841393	1.37274	-1.79842	-0.373566	-2.35295	-1.68601	-2.45603	-0.741104	1.2691	-1.04058	-1.74489	-1.21501	-1.10696	-0.560738	-1.2852	-1.79165	-0.452377	-2.88792	-1.51859	0.0475311
	0.703367	-3.58678	-3.5239	-4.09621	-2.81574	-3.96555	-3.79043	-4.70491	-2.67216	-3.88852	-3.419	-2.99138		0.703367	-1.30557	-2.29495	-0.876167	-2.55202	-1.82549	-0.680092	-1.24148	-1.1748	-1.35995	-2.06966	-1.85405	-1.18064	0.0155678	-1.16452	-2.18694	-0.868759	1.4423	-1.78095	-0.439083	-2.28789	-1.80293	-2.51913	-0.691807	1.25987	-1.00742	-1.68453	-1.1745	-1.12677	-0.545082	-1.26143	-1.6713	-0.412849	-2.87052	-1.4843	0.121521
	0.713607	-3.59415	-3.57244	-4.16656	-2.84398	-3.9015	-3.67656	-4.6357	-2.68158	-3.86628	-3.51915	-3.07775		0.713607	-1.28551	-2.32315	-0.840271	-2.65083	-1.68147	-0.705219	-1.17588	-1.19563	-1.32425	-2.10658	-1.76344	-1.18443	-0.0306854	-1.15083	-2.09159	-0.96489	1.46987	-1.70583	-0.434544	-2.24361	-1.88194	-2.61007	-0.615799	1.31718	-0.87677	-1.61283	-1.16786	-1.15209	-0.512657	-1.18588	-1.68186	-0.474632	-2.77622	-1.50476	0.139305
	0.723847	-3.5725	-3.44323	-4.057	-2.8176	-3.8552	-3.66096	-4.51187	-2.65227	-3.99128	-3.5497	-3.1859		0.723847	-1.26041	-2.28225	-0.811256	-2.70461	-1.68708	-0.683403	-1.18123	-1.25319	-1.29283	-2.15143	-1.72065	-1.24937	-0.0736847	-1.09904	-1.91666	-1.05503	1.53899	-1.54871	-0.42244	-2.22783	-1.8553	-2.69728	-0.661186	1.28682	-0.622395	-1.64507	-1.2041	-1.20092	-0.489628	-1.15489	-1.71937	-0.558052	-2.68341	-1.51962	0.237072
	0.734087	-3.53423	-3.45562	-4.08632	-2.63309	-3.7688	-3.65829	-4.38196	-2.59456	-4.04142	-3.49286	-3.22942		0.734087	-1.23378	-2.25754	-0.87751	-2.85269	-1.6609	-0.606953	-1.10786	-1.27467	-1.27126	-2.09848	-1.73371	-1.26634	-0.0851021	-1.11332	-1.75356	-1.02702	1.54591	-1.4582	-0.374271	-2.21694	-1.88509	-2.78671	-0.61319	1.2911	-0.454453	-1.69645	-1.18896	-1.1299	-0.376499	-1.06719	-1.7142	-0.512539	-2.70229	-1.50459	0.3255
	0.744327	-3.50968	-3.46563	-4.13479	-2.54319	-3.73593	-3.66771	-4.30837	-2.4568	-4.07613	-3.52842	-3.17985		0.744327	-1.20279	-2.07949	-0.837135	-2.81235	-1.67569	-0.581467	-1.09391	-1.33662	-1.30759	-2.16773	-1.91164	-1.26682	-0.173771	-1.11934	-1.64101	-1.02615	1.51974	-1.30861	-0.385582	-2.22457	-1.92248	-2.81332	-0.630104	1.42793	-0.265221	-1.65762	-1.25373	-1.09571	-0.3214	-1.05506	-1.70972	-0.440895	-2.67792	-1.43283	0.488827
	0.754567	-3.49188	-3.44661	-4.03402	-2.50114	-3.83411	-3.69982	-4.3172	-2.36877	-4.00923	-3.56559	-3.14227		0.754567	-1.17027	-1.98782	-0.800453	-2.65895	-1.69004	-0.522957	-0.988159	-1.34884	-1.31174	-2.15535	-2.01048	-1.23832	-0.139286	-1.07759	-1.54438	-0.979664	1.52074	-1.30035	-0.36657	-2.35098	-2.03336	-2.83623	-0.551868	1.40681	-0.122536	-1.5686	-1.24685	-1.10979	-0.286495	-1.01953	-1.58128	-0.349308	-2.59936	-1.47128	0.587452
	0.764807	-3.4663	-3.43695	-3.94393	-2.61427	-3.88428	-3.6388	-4.35135	-2.28899	-3.90428	-3.51155	-3.0886		0.764807	-1.14319	-1.98069	-0.816216	-2.64188	-1.78283	-0.469734	-0.966488	-1.31674	-1.37275	-2.09072	-1.99671	-1.20583	-0.0736732	-1.03941	-1.3729	-1.08458	1.48372	-1.31768	-0.305275	-2.26866	-1.9928	-2.87734	-0.499035	1.44423	0.00823975	-1.42369	-1.18839	-1.06691	-0.244534	-1.0376	-1.58268	-0.328255	-2.6284	-1.54121	0.710167
	0.775047	-3.44777	-3.44366	-3.88928	-2.71903	-3.99026	-3.45703	-4.39542	-2.20226	-3.87661	-3.41648	-3.08765		0.775047	-1.12181	-2.02449	-0.820721	-2.67623	-1.87662	-0.407207	-0.919376	-1.26121	-1.40377	-2.02221	-1.95941	-1.18003	0.0318985	-0.910736	-1.23706	-1.25597	1.48501	-1.30687	-0.23719	-2.23979	-1.91487	-2.92705	-0.462082	1.4475	0.165176	-1.32604	-1.11106	-0.990639	-0.124741	-1.14753	-1.62614	-0.253654	-2.63229	-1.53884	0.891388
	0.785287	-3.40941	-3.40976	-3.8618	-2.70396	-3.99949	-3.32642	-4.34781	-2.11202	-3.95652	-3.29534	-3.08094		0.785287	-1.10355	-2.15881	-0.796829	-2.70336	-1.8031	-0.35535	-0.88308	-1.18774	-1.44053	-2.02199	-1.98462	-1.13089	0.0284882	-0.760303	-1.16193	-1.40227	1.53074	-1.32743	-0.239574	-2.1827	-1.7859	-2.86683	-0.489819	1.3736	0.21888	-1.24615	-1.2018	-0.933456	-0.0441093	-1.09512	-1.64101	-0.324619	-2.65315	-1.48869	1.07471
	0.795527	-3.35563	-3.312	-3.80048	-2.67445	-3.92539	-3.21647	-4.35096	-2.0362	-3.97159	-3.2828	-2.98598		0.795527	-1.07823	-2.15784	-0.880959	-2.68966	-1.74757	-0.35136	-0.770058	-1.11952	-1.42343	-1.98579	-1.94119	-1.16187	-0.000892639	-0.734863	-1.15956	-1.52137	1.68263	-1.27496	-0.206005	-2.12024	-1.7995	-2.77283	-0.489094	1.37241	0.329365	-1.05995	-1.28196	-0.915134	0.0363808	-0.973164	-1.63837	-0.358894	-2.67952	-1.43682	1.18587
	0.805767	-3.30814	-3.24186	-3.77756	-2.61823	-3.7804	-3.14948	-4.34107	-1.97007	-4.01138	-3.29481	-2.89655		0.805767	-1.06126	-2.09158	-0.90659	-2.72242	-1.7125	-0.231922	-0.667313	-1.20645	-1.42493	-2.05135	-1.98816	-1.20917	-0.0177383	-0.723206	-1.14926	-1.44019	1.70602	-1.20385	-0.208412	-2.06247	-1.88645	-2.72919	-0.393749	1.44104	0.284996	-1.01452	-1.28957	-0.876415	0.130413	-0.912979	-1.58401	-0.353935	-2.55527	-1.3702	1.20686
	0.816007	-3.28385	-3.18764	-3.7039	-2.65442	-3.67227	-3.13356	-4.35041	-1.86452	-4.01341	-3.37436	-2.88401		0.816007	-1.02804	-2.01984	-0.936497	-2.7021	-1.63694	-0.163509	-0.64925	-1.30357	-1.32301	-2.09471	-1.99282	-1.25685	-0.0641937	-0.70647	-0.9832	-1.42272	1.6633	-1.14545	-0.263084	-2.04145	-1.97913	-2.57928	-0.246002	1.4914	0.446426	-1.02936	-1.28735	-0.786888	0.0493889	-0.87154	-1.5824	-0.335037	-2.53663	-1.36558	1.221
	0.826247	-3.25915	-3.11205	-3.58494	-2.60517	-3.63997	-3.05056	-4.39466	-1.82206	-4.06762	-3.43097	-2.88351		0.826247	-1.00792	-1.93365	-0.890575	-2.70865	-1.57753	-0.118671	-0.580395	-1.37568	-1.23383	-2.09353	-1.92993	-1.30757	-0.115707	-0.665535	-0.783073	-1.41367	1.65018	-1.0784	-0.335148	-2.07458	-1.99456	-2.55507	-0.240448	1.41057	0.567482	-0.994732	-1.23649	-0.688805	-0.0617981	-0.871208	-1.62151	-0.375473	-2.49525	-1.34405	1.1386
	0.836487	-3.24213	-3.1237	-3.48302	-2.64482	-3.67585	-2.89649	-4.47711	-1.77753	-4.08452	-3.39328	-2.86502		0.836487	-0.99929	-1.92667	-0.817142	-2.73893	-1.63821	-0.105156	-0.464943	-1.33241	-1.13803	-2.11151	-1.93789	-1.34678	-0.149704	-0.55275	-0.682617	-1.53338	1.54585	-1.04743	-0.334179	-2.20132	-1.93971	-2.618	-0.182869	1.37063	0.73465	-0.948456	-1.24448	-0.594532	-0.0246658	-0.907696	-1.58993	-0.491966	-2.48552	-1.37092	1.1343
	0.846727	-3.2311	-3.09972	-3.5088	-2.69714	-3.71252	-2.70115	-4.43249	-1.86946	-4.06267	-3.34127	-2.88578		0.846727	-0.986666	-2.00358	-0.795757	-2.69851	-1.71224	-0.12685	-0.397171	-1.32753	-1.17069	-2.09483	-1.9997	-1.42465	-0.187424	-0.540123	-0.603092	-1.48683	1.42936	-1.07088	-0.176346	-2.2493	-1.90356	-2.75048	-0.197994	1.31818	0.909653	-0.892929	-1.29776	-0.510025	0.0546799	-0.875309	-1.63322	-0.456978	-2.48336	-1.41119	1.24173
	0.856967	-3.18373	-3.22234	-3.42723	-2.69932	-3.59085	-2.63327	-4.31296	-1.85476	-3.97605	-3.26625	-2.85424		0.856967	-0.968972	-2.02604	-0.76059	-2.70866	-1.81776	-0.0967522	-0.399197	-1.31284	-1.21297	-2.03489	-2.03339	-1.43027	-0.149754	-0.433052	-0.587929	-1.43502	1.3989	-1.02496	0.0365601	-2.23611	-1.86259	-2.72479	-0.229958	1.31683	1.02849	-0.957882	-1.26939	-0.513794	0.154636	-0.896145	-1.67279	-0.455002	-2.49289	-1.40021	1.23316
	0.867207	-3.12649	-3.25518	-3.42217	-2.71694	-3.53718	-2.5623	-4.15462	-1.7674	-3.75487	-3.22932	-2.86489		0.867207	-0.94978	-2.03699	-0.85796	-2.72585	-1.85944	-0.194862	-0.307381	-1.35394	-1.26472	-2.07918	-2.02867	-1.41621	-0.144039	-0.450836	-0.492466	-1.44698	1.36777	-0.911438	0.143383	-2.28821	-1.86374	-2.72343	-0.302959	1.35368	1.11835	-1.08691	-1.25538	-0.45438	0.21907	-0.863968	-1.62028	-0.439335	-2.58785	-1.38863	1.18208
	0.877447	-3.03013	-3.21308	-3.34484	-2.51594	-3.42859	-2.38205	-3.99097	-1.70974	-3.6577	-3.22913	-2.82925		0.877447	-0.935178	-2.00411	-0.840355	-2.74105	-1.8729	-0.211788	-0.232063	-1.31971	-1.21928	-2.09735	-1.91199	-1.23136	-0.0947838	-0.457775	-0.43441	-1.5312	1.3528	-0.85807	0.164925	-2.35788	-1.89809	-2.70934	-0.379852	1.3549	1.16228	-1.13628	-1.30183	-0.529659	0.171635	-0.816307	-1.48872	-0.4277	-2.53828	-1.34332	1.17165
	0.887687	-2.97118	-3.20562	-3.25737	-2.41143	-3.35218	-2.18559	-3.8224	-1.68943	-3.65306	-3.30167	-2.833		0.887687	-0.906917	-1.96215	-0.892902	-2.72697	-1.81838	-0.163795	-0.158966	-1.22781	-1.23341	-2.09338	-1.84759	-1.22459	-0.0732536	-0.421192	-0.32444	-1.57901	1.26614	-0.773884	0.14645	-2.34233	-2.0003	-2.69521	-0.385334	1.28098	1.33729	-1.27731	-1.34026	-0.592697	0.210609	-0.769878	-1.46397	-0.419605	-2.59644	-1.25308	1.19897
	0.897927	-2.93921	-3.12484	-3.21515	-2.385	-3.30011	-2.11438	-3.70977	-1.63702	-3.76696	-3.33542	-2.80346		0.897927	-0.886806	-1.91241	-0.880768	-2.75941	-1.80412	-0.201157	-0.0307198	-1.20618	-1.28673	-2.16301	-1.84792	-1.25211	-0.135601	-0.39592	-0.298248	-1.537	1.25893	-0.732185	0.163307	-2.34579	-2.13457	-2.71163	-0.36042	1.23181	1.4436	-1.63398	-1.36884	-0.608734	0.336277	-0.782738	-1.40414	-0.398304	-2.68653	-1.28463	1.20005
	0.908167	-2.89961	-3.04507	-3.12475	-2.43057	-3.24317	-2.06133	-3.63322	-1.62762	-3.79459	-3.29602	-2.73979		0.908167	-0.864482	-1.92504	-0.885162	-2.66113	-1.78035	-0.321106	0.126766	-1.04192	-1.35549	-2.18395	-1.78619	-1.32705	-0.137833	-0.302303	-0.262344	-1.48374	1.30726	-0.710739	0.187134	-2.33326	-2.11001	-2.71155	-0.441551	1.2832	1.59284	-1.70005	-1.37073	-0.569664	0.412071	-0.774792	-1.28951	-0.346329	-2.69796	-1.31209	1.24009
	0.918407	-2.88808	-2.99236	-3.09695	-2.55853	-3.30576	-1.9563	-3.61703	-1.62857	-3.75666	-3.28275	-2.68591		0.918407	-0.826975	-1.85495	-0.820972	-2.59953	-1.73452	-0.300014	0.224152	-0.951698	-1.34642	-2.11934	-1.73415	-1.47479	-0.176502	-0.283123	-0.245583	-1.48821	1.36842	-0.632385	0.153419	-2.28347	-2.09905	-2.69907	-0.449303	1.40604	1.68504	-1.54138	-1.36292	-0.575481	0.57198	-0.846924	-1.31395	-0.247826	-2.67158	-1.26372	1.29037
	0.928648	-2.84438	-2.91771	-3.11654	-2.27033	-3.38296	-1.88245	-3.5719	-1.58103	-3.7071	-3.2685	-2.74531		0.928648	-0.802008	-1.88334	-0.851021	-2.63892	-1.68491	-0.280941	0.30912	-0.970543	-1.35644	-2.1458	-1.72845	-1.55886	-0.206783	-0.257683	-0.212036	-1.57918	1.3738	-0.604275	0.222672	-2.15562	-2.2117	-2.66099	-0.390137	1.55654	1.7614	-1.25129	-1.37514	-0.644623	0.677177	-0.800323	-1.32232	-0.214104	-2.69512	-1.18893	1.34396
	0.938888	-2.80912	-2.87355	-3.19606	-1.99595	-3.34674	-1.83717	-3.49632	-1.53405	-3.71564	-3.30226	-2.79346		0.938888	-0.791821	-1.89556	-0.951195	-2.66141	-1.63716	-0.24675	0.388527	-1.0927	-1.34147	-2.07447	-1.77883	-1.58897	-0.282578	-0.443493	-0.141766	-1.70636	1.37722	-0.697376	0.369762	-2.09666	-2.2215	-2.60273	-0.447166	1.58056	1.83313	-1.03829	-1.50352	-0.663475	0.809753	-0.793636	-1.35417	-0.232124	-2.70126	-1.12155	1.37169
	0.949128	-2.80778	-2.94677	-3.26372	-2.08899	-3.22982	-1.76365	-3.41314	-1.5098	-3.74786	-3.30732	-2.80668		0.949128	-0.775096	-1.83771	-0.949249	-2.73701	-1.59037	-0.203087	0.427567	-1.08503	-1.35892	-2.10971	-1.78443	-1.61687	-0.352097	-0.501549	-0.0776291	-1.7573	1.25877	-0.697433	0.477528	-2.07857	-2.11288	-2.64531	-0.514198	1.55446	1.87883	-0.906181	-1.55464	-0.637329	0.938988	-0.716553	-1.3966	-0.262032	-2.71047	-1.1106	1.39339
	0.959368	-2.81546	-3.07094	-3.2967	-2.25293	-3.15792	-1.69809	-3.34748	-1.496	-3.78263	-3.25895	-2.79297		0.959368	-0.759347	-1.75847	-0.938427	-2.8324	-1.58311	-0.16687	0.544441	-1.04156	-1.30513	-2.04698	-1.80617	-1.6006	-0.484455	-0.432423	0.0567894	-1.76254	1.1496	-0.601135	0.622929	-2.08908	-2.05467	-2.66943	-0.505283	1.4677	1.93741	-0.869835	-1.65485	-0.692139	0.938343	-0.725639	-1.43039	-0.269035	-2.65937	-1.02531	1.45321
	0.969608	-2.84982	-3.15637	-3.37196	-2.46381	-3.06721	-1.72463	-3.34385	-1.43018	-3.87234	-3.28279	-2.78502		0.969608	-0.744084	-1.67519	-0.926052	-2.83214	-1.6216	-0.218655	0.686905	-0.950649	-1.23096	-2.05384	-1.82755	-1.66011	-0.741375	-0.38768	0.0840073	-1.73081	1.07044	-0.503304	0.809738	-2.16034	-2.0578	-2.65925	-0.464973	1.47268	2.08365	-0.875153	-1.64713	-0.62883	0.905823	-0.817764	-1.47874	-0.310932	-2.59136	-1.03439	1.44459
	0.979848	-2.84183	-3.12733	-3.38375	-2.58619	-2.87999	-1.78162	-3.33562	-1.35662	-3.83933	-3.31279	-2.81506		0.979848	-0.726046	-1.68622	-0.995743	-2.74478	-1.62328	-0.231007	0.774754	-0.906517	-1.21529	-2.06903	-1.79893	-1.6626	-0.84375	-0.318779	0.140091	-1.7542	1.0287	-0.479534	0.89642	-2.23781	-2.1046	-2.50169	-0.374901	1.51578	2.09312	-0.767639	-1.60821	-0.595192	0.839245	-0.832664	-1.4894	-0.275623	-2.51833	-0.986206	1.42739
	0.990088	-2.82382	-3.1447	-3.48255	-2.63466	-2.71582	-1.737	-3.25045	-1.37737	-3.75915	-3.28696	-2.84949		0.990088	-0.708353	-1.64615	-0.92881	-2.70422	-1.63319	-0.245548	0.825489	-0.820457	-1.30046	-2.06388	-1.81184	-1.63383	-0.895702	-0.421322	0.22377	-1.77499	0.985683	-0.436974	0.961231	-2.11396	-1.9413	-2.38658	-0.293041	1.57819	2.072	-0.702084	-1.68599	-0.555191	0.870861	-0.734745	-1.41196	-0.187172	-2.58298	-0.947979	1.36029
	1.00033	-2.8003	-3.08085	-3.58084	-2.59677	-2.7329	-1.6119	-3.2136	-1.36882	-3.7226	-3.30471	-2.79001		1.00033	-0.698062	-1.57325	-0.952301	-2.71225	-1.67566	-0.265602	0.790966	-0.690472	-1.38905	-2.12002	-1.83122	-1.57248	-0.945618	-0.50124	0.371765	-1.70424	0.905296	-0.276093	1.09319	-2.03143	-1.79141	-2.43922	-0.220253	1.63034	2.03035	-0.72633	-1.66617	-0.546608	0.901695	-0.600651	-1.28269	-0.236729	-2.62788	-0.995625	1.2547
	1.01057	-2.7597	-2.99705	-3.5107	-2.53072	-2.74948	-1.46405	-3.33933	-1.33571	-3.69273	-3.22427	-2.75294		1.01057	-0.67654	-1.48991	-0.933609	-2.70942	-1.67084	-0.171196	0.810455	-0.573242	-1.39617	-2.16106	-1.86501	-1.64433	-0.919785	-0.440918	0.415657	-1.71405	0.821724	-0.163612	1.27311	-2.04913	-1.72274	-2.43116	-0.114204	1.66142	2.02625	-0.755074	-1.54486	-0.530315	0.837467	-0.53289	-1.31069	-0.249325	-2.66501	-1.02478	1.1522
	1.02081	-2.67594	-2.94425	-3.42547	-2.40175	-2.72185	-1.30955	-3.36668	-1.25839	-3.64486	-3.15622	-2.53039		1.02081	-0.665106	-1.47701	-1.02583	-2.72021	-1.70173	-0.144039	0.777901	-0.60413	-1.34251	-2.12693	-1.80674	-1.73236	-1.03506	-0.475361	0.415993	-1.70002	0.739395	-0.117138	1.29319	-2.13831	-1.70454	-2.41161	-0.180016	1.70964	2.06613	-0.7355	-1.49318	-0.521614	0.834404	-0.541794	-1.34983	-0.188164	-2.60681	-1.06362	1.10675
	1.03105	-2.62257	-2.82748	-3.40771	-2.26955	-2.69552	-1.31577	-3.32294	-1.21942	-3.64758	-3.16382	-2.35589		1.03105	-0.65966	-1.38068	-1.08192	-2.76761	-1.70206	-0.221756	0.72858	-0.652229	-1.27716	-2.1257	-1.74842	-1.81911	-1.1293	-0.522041	0.365105	-1.63499	0.634087	-0.084568	1.42762	-2.17961	-1.70173	-2.45762	-0.251606	1.6762	2.14378	-0.689198	-1.54617	-0.572144	0.863121	-0.53476	-1.28955	-0.125347	-2.53141	-1.03958	1.0966
	1.04129	-2.59521	-2.78398	-3.27543	-2.23035	-2.68925	-1.32232	-3.34316	-1.16202	-3.64514	-3.21815	-2.28228		1.04129	-0.655532	-1.33563	-1.19422	-2.83569	-1.64069	-0.292397	0.595535	-0.730263	-1.26586	-2.03055	-1.71483	-1.87111	-1.21518	-0.541641	0.375748	-1.69544	0.52029	0.0220184	1.56585	-2.27307	-1.61586	-2.41691	-0.306259	1.59644	2.1902	-0.660587	-1.65022	-0.573601	0.870552	-0.521877	-1.17636	-0.0990753	-2.40293	-0.937153	1.16462
	1.05153	-2.5194	-2.73339	-3.04097	-2.207	-2.60073	-1.17716	-3.32858	-1.12906	-3.56501	-3.20348	-2.2086		1.05153	-0.650065	-1.28864	-1.15714	-2.94263	-1.59494	-0.229218	0.511429	-0.666725	-1.25389	-1.99257	-1.6229	-1.94629	-1.24792	-0.583851	0.308598	-1.80935	0.499866	-0.0193138	1.78454	-2.27245	-1.54115	-2.32105	-0.348843	1.51529	2.21293	-0.610687	-1.70049	-0.497272	0.994896	-0.455105	-1.14265	-0.0985985	-2.36678	-0.99168	1.19631
	1.06177	-2.43702	-2.73405	-2.89817	-2.15443	-2.51852	-1.15071	-3.25094	-0.955803	-3.45314	-3.1156	-2.13888		1.06177	-0.638311	-1.43652	-1.10529	-2.89512	-1.52085	-0.253548	0.522934	-0.5844	-1.34378	-1.90688	-1.68512	-1.90107	-1.39246	-0.628521	0.478565	-1.93808	0.455605	-0.0596161	1.87005	-2.30745	-1.45577	-2.29388	-0.363983	1.52449	2.19188	-0.71143	-1.64581	-0.542931	1.22151	-0.432312	-1.13995	-0.149345	-2.47737	-1.00928	1.14793
	1.07201	-2.39464	-2.77424	-2.90014	-2.09536	-2.53492	-1.08511	-3.28298	-0.874439	-3.31436	-3.01611	-2.06878		1.07201	-0.631259	-1.71619	-1.11423	-2.92145	-1.55149	-0.247753	0.583733	-0.527275	-1.43671	-1.8912	-1.6669	-1.93189	-1.45489	-0.737511	0.535748	-2.00238	0.443901	-0.0723877	1.95316	-2.29543	-1.3769	-2.2538	-0.366356	1.53624	2.09393	-0.940445	-1.66038	-0.506237	1.24273	-0.453499	-1.16309	-0.17215	-2.50431	-0.983582	1.04674
	1.08225	-2.39453	-2.87395	-2.98849	-1.97602	-2.57991	-1.04023	-3.27216	-0.843422	-3.34249	-2.98572	-2.0429		1.08225	-0.620564	-1.70553	-1.12684	-2.9959	-1.57861	-0.20734	0.61034	-0.378098	-1.51421	-1.8181	-1.63029	-1.88964	-1.43102	-0.78014	0.469078	-2.02348	0.399555	-0.0328407	2.06248	-2.16952	-1.36495	-2.11232	-0.278843	1.52271	2.01718	-0.930885	-1.716	-0.505077	1.29642	-0.533558	-1.18731	-0.151611	-2.50314	-0.950745	0.985146
	1.09249	-2.38356	-2.87333	-2.9935	-1.87529	-2.75924	-0.926319	-3.16626	-0.909859	-3.29912	-2.93636	-2.0963		1.09249	-0.601671	-1.46929	-1.2696	-2.91515	-1.62507	-0.200893	0.610733	-0.283028	-1.46795	-1.77917	-1.58511	-1.9058	-1.44566	-0.753605	0.528492	-2.03787	0.420448	-0.10215	2.1827	-2.12717	-1.3065	-2.1854	-0.259712	1.46297	1.93738	-0.83654	-1.87323	-0.572979	1.4339	-0.53363	-1.1688	-0.0572701	-2.44547	-0.944672	0.917717
	1.10273	-2.3515	-2.79247	-3.03762	-1.76144	-2.74848	-0.922424	-2.90958	-0.952736	-3.28754	-2.91664	-2.18609		1.10273	-0.597463	-1.27785	-1.29308	-2.86653	-1.76233	-0.21384	0.614014	-0.183784	-1.40396	-1.8047	-1.63303	-1.93713	-1.50779	-0.69561	0.500008	-2.03594	0.444042	-0.0123596	2.25653	-2.10569	-1.13565	-2.2121	-0.257923	1.42669	1.8684	-0.82246	-1.94011	-0.626541	1.5139	-0.489071	-1.00666	-0.0815659	-2.40679	-0.990917	0.89209
	1.11297	-2.32586	-2.71254	-3.00614	-1.78022	-2.6659	-0.953442	-2.66948	-1.02501	-3.34421	-2.87754	-2.2241		1.11297	-0.599438	-1.24061	-1.33038	-2.89293	-1.8039	-0.21714	0.626434	-0.112213	-1.40003	-1.79929	-1.78023	-1.89453	-1.5892	-0.645306	0.550808	-1.99449	0.418327	0.066349	2.33928	-2.18638	-0.983681	-2.30173	-0.218582	1.4263	1.79961	-0.879059	-1.95738	-0.705246	1.51762	-0.46624	-0.992905	-0.190674	-2.404	-0.952805	0.858414
	1.12321	-2.2885	-2.576	-3.00694	-1.74255	-2.41236	-0.97559	-2.62156	-1.05112	-3.41407	-2.90643	-2.17841		1.12321	-0.599375	-1.19799	-1.32102	-2.91702	-1.80712	-0.187504	0.546001	-0.0361938	-1.31009	-1.75124	-1.77699	-1.88237	-1.62974	-0.627686	0.545334	-1.97547	0.272392	0.0569458	2.45731	-2.22441	-0.855186	-2.35858	-0.300575	1.44335	1.74309	-0.939404	-1.90211	-0.781731	1.51624	-0.437462	-1.14535	-0.281464	-2.34165	-1.08584	0.761696
	1.13345	-2.2577	-2.46156	-2.97459	-1.57626	-2.37759	-0.980751	-2.67254	-1.11324	-3.44296	-2.8643	-2.11324		1.13345	-0.582007	-1.03048	-1.27996	-2.98021	-1.84541	-0.0754242	0.536728	0.125755	-1.28356	-1.68239	-1.73557	-1.79296	-1.64703	-0.589779	0.549854	-1.8809	0.124142	0.0331993	2.55564	-2.18207	-0.728798	-2.34793	-0.357567	1.41835	1.739	-0.938797	-1.89956	-0.8302	1.51006	-0.430191	-1.28952	-0.276028	-2.28423	-1.16367	0.736176
	1.14369	-2.27139	-2.43899	-3.0019	-1.43909	-2.41094	-1.00297	-2.78948	-1.19198	-3.46	-2.88552	-2.09307		1.14369	-0.575562	-0.987827	-1.31866	-3.07921	-1.8884	-0.0929222	0.459087	0.165497	-1.33903	-1.60595	-1.66501	-1.78178	-1.70277	-0.601494	0.500786	-1.83677	-0.0493393	0.0960808	2.66212	-2.00609	-0.696648	-2.32903	-0.315392	1.26538	1.68754	-0.919846	-1.95477	-0.810936	1.54745	-0.329926	-1.33668	-0.283577	-2.22342	-1.16275	0.669014
	1.15393	-2.22295	-2.42488	-2.94462	-1.31301	-2.40294	-0.975624	-2.82237	-1.16211	-3.16321	-2.909	-2.11175		1.15393	-0.574994	-0.900795	-1.28257	-3.2348	-1.8757	-0.0129013	0.398132	0.0868073	-1.40649	-1.53644	-1.65349	-1.77699	-1.73968	-0.654636	0.515522	-1.9111	-0.187622	0.0916939	2.76186	-1.93317	-0.683212	-2.23764	-0.269344	1.08638	1.62532	-0.910213	-2.08365	-0.957691	1.55028	-0.300205	-1.28038	-0.318993	-2.18866	-1.16132	0.698444
	1.16417	-2.18154	-2.38467	-2.94838	-1.33823	-2.37827	-0.956837	-2.74733	-1.11254	-2.92113	-2.93699	-2.09098		1.16417	-0.573135	-0.899948	-1.2764	-3.30239	-1.83846	0.00204849	0.422546	-0.0371094	-1.47775	-1.55197	-1.59271	-1.81636	-1.71527	-0.753555	0.470009	-1.86272	-0.27803	0.0822678	2.82279	-1.93797	-0.67778	-2.17157	-0.347164	0.929234	1.59863	-0.95433	-2.19775	-0.966145	1.58114	-0.252415	-1.2415	-0.35849	-2.15412	-1.16825	0.595924
	1.17441	-2.13386	-2.35303	-2.94508	-1.28049	-2.30164	-0.938381	-2.59275	-1.27818	-2.66438	-2.90531	-2.07935		1.17441	-0.56734	-0.87632	-1.28129	-3.29443	-1.70368	0.00447083	0.366302	-0.144447	-1.45942	-1.49947	-1.60495	-1.80545	-1.7447	-0.819519	0.530472	-1.84137	-0.410583	0.103973	2.76959	-1.89636	-0.618233	-2.1392	-0.444782	0.90884	1.53712	-0.907551	-2.17965	-0.916149	1.54568	-0.242676	-1.12286	-0.342228	-2.10052	-1.1562	0.561298
	1.18465	-2.08375	-2.36252	-2.97042	-1.25728	-2.19133	-0.879253	-2.47934	-1.26585	-2.55096	-2.81781	-2.06269		1.18465	-0.573928	-0.924278	-1.2941	-3.24574	-1.63062	-0.148964	0.307724	-0.186134	-1.46235	-1.50691	-1.71519	-1.83669	-1.75603	-0.70546	0.56094	-1.76442	-0.536419	0.199116	2.75842	-1.87369	-0.516701	-2.1335	-0.409233	1.0383	1.46941	-0.842487	-2.12381	-0.939167	1.50967	-0.202904	-1.12536	-0.334026	-1.77837	-1.20695	0.481213
	1.19489	-2.03249	-2.31279	-3.0496	-1.12178	-2.12985	-0.715668	-2.50777	-1.20284	-2.45964	-2.82349	-2.00153		1.19489	-0.565211	-0.982224	-1.32257	-3.14613	-1.57775	-0.133041	0.260128	-0.179268	-1.46047	-1.37671	-1.75487	-1.82618	-1.64592	-0.73558	0.511871	-1.59398	-0.636826	0.289715	2.78121	-1.90938	-0.341869	-2.20205	-0.32066	1.02019	1.45232	-0.845554	-2.2019	-0.886284	1.53333	-0.133026	-1.1507	-0.369202	-1.4191	-1.22054	0.488029
	1.20513	-1.98029	-2.15919	-3.03976	-1.0441	-2.08906	-0.617153	-2.48594	-1.11917	-2.46664	-2.7978	-1.98406		1.20513	-0.5494	-1.00482	-1.39414	-3.07963	-1.53066	-0.0553741	0.340843	-0.0235596	-1.41445	-1.29554	-1.83048	-1.76752	-1.70884	-0.761868	0.58136	-1.46073	-0.656631	0.364983	2.84261	-1.9407	-0.193382	-2.30518	-0.257526	0.995506	1.58772	-0.870087	-2.3238	-0.80162	1.5088	-0.175224	-1.10658	-0.402596	-1.49877	-1.23471	0.530003
	1.21537	-1.93604	-1.98165	-2.90963	-1.00291	-2.02828	-0.601654	-2.44624	-1.1643	-2.37299	-2.74343	-2.10935		1.21537	-0.535661	-0.995853	-1.3858	-3.15843	-1.61041	-0.100361	0.356091	0.0476494	-1.37727	-1.32664	-1.88546	-1.7568	-1.6996	-0.754726	0.724075	-1.50066	-0.649239	0.377464	2.87614	-1.88714	-0.040329	-2.29799	-0.265602	0.974644	1.624	-0.868568	-2.26853	-0.677635	1.52714	-0.191841	-1.06969	-0.313293	-1.63974	-1.27708	0.480282
	1.22561	-1.90407	-1.81161	-2.75647	-0.979961	-2.04523	-0.606384	-2.44012	-1.1922	-2.33666	-2.79128	-2.08079		1.22561	-0.523152	-0.953804	-1.4052	-3.15901	-1.64502	-0.128391	0.343098	-0.00485229	-1.29831	-1.3929	-1.88055	-1.75727	-1.75523	-0.700859	0.78405	-1.60066	-0.574543	0.418079	2.92287	-1.9197	0.108337	-2.24807	-0.259933	1.04448	1.53171	-0.878765	-2.32864	-0.679306	1.55856	-0.185825	-1.12074	-0.285103	-1.81329	-1.32063	0.416985
	1.23585	-1.86921	-1.74049	-2.63671	-0.908787	-1.98329	-0.619965	-2.50007	-1.13651	-2.31623	-2.8314	-2.01865		1.23585	-0.523121	-0.909332	-1.37625	-3.17898	-1.63448	-0.111305	0.291504	0.00561523	-1.29879	-1.43626	-1.76535	-1.72161	-1.7448	-0.749279	0.879372	-1.66315	-0.521114	0.420559	2.91021	-1.91832	0.182762	-2.2111	-0.353325	1.09374	1.36713	-0.962166	-2.41407	-0.706802	1.48563	-0.206005	-1.13409	-0.330032	-1.99434	-1.35064	0.28516
	1.24609	-1.83338	-1.62613	-2.59599	-0.86285	-1.98008	-0.572781	-2.47815	-1.16814	-2.25805	-2.85509	-1.9365		1.24609	-0.516724	-0.813557	-1.42454	-3.21761	-1.66161	-0.0876923	0.198746	-0.068882	-1.34907	-1.39375	-1.6452	-1.55556	-1.73114	-0.797298	0.921272	-1.53643	-0.527954	0.400414	2.92604	-1.89597	0.236404	-2.12333	-0.401356	1.10029	1.35509	-1.00763	-2.42614	-0.70887	1.49041	-0.22998	-1.07656	-0.387394	-2.09985	-1.26918	0.197399
	1.25633	-1.79758	-1.57611	-2.58976	-0.757462	-1.87351	-0.605495	-2.55352	-1.24453	-2.16153	-2.77847	-1.83545		1.25633	-0.512703	-0.820663	-1.38329	-3.23942	-1.69824	-0.170448	0.220894	-0.151947	-1.28432	-1.24471	-1.62828	-1.4628	-1.82445	-0.924423	0.970695	-1.45139	-0.620392	0.403141	3.08565	-1.88762	0.281475	-2.13383	-0.288799	1.10011	1.29256	-1.05794	-2.32793	-0.785378	1.52041	-0.169003	-1.07231	-0.309933	-2.18381	-1.27712	0.0455856
	1.26657	-1.78321	-1.57769	-2.6321	-0.711697	-1.79664	-0.602013	-2.55464	-1.41594	-2.04725	-2.67195	-1.82222		1.26657	-0.501084	-0.788979	-1.40857	-3.26949	-1.6243	-0.219894	0.264618	-0.131657	-1.20373	-1.10274	-1.56356	-1.46383	-1.84594	-0.91349	1.06015	-1.41629	-0.686966	0.448193	3.1762	-1.86428	0.346985	-2.28043	-0.275875	0.889397	1.1361	-1.17219	-2.20704	-0.733696	1.49703	-0.0816841	-1.02309	-0.385666	-2.21511	-1.23099	-0.0164032
	1.27681	-1.7582	-1.62732	-2.62431	-0.602879	-1.69684	-0.591412	-2.51043	-1.5021	-2.00308	-2.60852	-1.81509		1.27681	-0.490197	-0.704456	-1.34969	-3.27351	-1.61312	-0.272308	0.294651	-0.17873	-1.21267	-1.05098	-1.53265	-1.49123	-1.88918	-0.854336	1.08874	-1.34313	-0.624073	0.50193	3.19104	-1.84245	0.4081	-2.32042	-0.323418	0.82531	1.03111	-1.16093	-2.1473	-0.690582	1.4924	-0.0527496	-0.972107	-0.503326	-2.22367	-1.22207	0.0385399
	1.28705	-1.76154	-1.70238	-2.65981	-0.462299	-1.84613	-0.692524	-2.40442	-1.52156	-1.89169	-2.59143	-1.8432		1.28705	-0.475954	-0.711823	-1.2965	-3.29879	-1.66944	-0.297104	0.273869	-0.201393	-1.36782	-0.975571	-1.51282	-1.49884	-1.91544	-0.767708	1.32085	-1.30971	-0.673035	0.495255	3.25277	-1.8284	0.49324	-2.26498	-0.366592	0.804924	1.0472	-1.09744	-2.12191	-0.540627	1.43086	-0.064949	-0.895264	-0.540054	-2.20888	-1.25141	0.108574
	1.29729	-1.75073	-1.77539	-2.62123	-0.383442	-1.95451	-0.761047	-2.27309	-1.53516	-1.68689	-2.64634	-1.87022		1.29729	-0.466519	-0.74258	-1.31794	-3.31817	-1.70184	-0.181988	0.326908	-0.227428	-1.42265	-0.956306	-1.51065	-1.43724	-1.82553	-0.79657	1.48388	-1.39657	-0.692226	0.551952	3.29346	-1.83448	0.654221	-2.32265	-0.399162	0.784847	1.07416	-1.08674	-2.16045	-0.42012	1.39937	-0.0292892	-0.942661	-0.539352	-2.34449	-1.27841	0.0992508
	1.30753	-1.73468	-1.7469	-2.54272	-0.326614	-2.01236	-0.896469	-2.24906	-1.48422	-1.47495	-2.70875	-1.90471		1.30753	-0.460792	-0.673592	-1.36546	-3.37569	-1.69015	-0.1423	0.318947	-0.211311	-1.39604	-0.936749	-1.3803	-1.43052	-1.85157	-0.77058	1.6581	-1.43863	-0.784172	0.597664	3.24256	-1.90128	0.788654	-2.38452	-0.448071	0.776432	0.996578	-1.01267	-2.13257	-0.402653	1.30724	0.091362	-0.957371	-0.557861	-2.31315	-1.30396	0.0435333
	1.31777	-1.73096	-1.70041	-2.55064	-0.277905	-1.98362	-1.0592	-2.24977	-1.48343	-1.28072	-2.79764	-1.92624		1.31777	-0.455769	-0.627781	-1.47537	-3.4185	-1.78609	-0.145699	0.299736	-0.255264	-1.51937	-1.01598	-1.29504	-1.43474	-1.85461	-0.786293	1.88754	-1.39365	-0.967575	0.720562	3.23043	-1.92157	0.865211	-2.32978	-0.47139	0.691605	0.945518	-1.06647	-2.10636	-0.376991	1.13752	0.168121	-0.983845	-0.600506	-2.22411	-1.32595	0.0375862
	1.32801	-1.73016	-1.61715	-2.58576	-0.243763	-1.91595	-1.12335	-2.279	-1.56638	-1.16106	-2.81343	-1.99575		1.32801	-0.449654	-0.624039	-1.5719	-3.39108	-1.86733	-0.228622	0.285721	-0.29229	-1.57453	-1.03289	-1.21692	-1.3861	-1.89575	-0.653183	2.18823	-1.24816	-1.09218	0.774906	3.08348	-1.93467	0.911209	-2.31603	-0.376213	0.662865	0.894131	-1.11915	-2.13972	-0.398495	0.909271	0.112484	-0.992493	-0.632767	-2.14358	-1.33407	-0.0356064
	1.33825	-1.70299	-1.49215	-2.54898	-0.18578	-1.94388	-1.07196	-2.34595	-1.58011	-1.05286	-2.82281	-1.98544		1.33825	-0.442302	-0.635056	-1.66711	-3.36355	-1.88466	-0.302849	0.336159	-0.292908	-1.56881	-0.831844	-1.1608	-1.37161	-1.88795	-0.550186	2.36047	-1.204	-1.1565	0.83226	2.91225	-1.91106	0.951065	-2.3014	-0.35268	0.590313	0.77412	-1.06818	-2.22343	-0.429848	0.871742	-0.0142365	-0.969292	-0.7561	-2.06449	-1.37253	-0.0308151
	1.34849	-1.67151	-1.35873	-2.53609	-0.135593	-1.9218	-1.00063	-2.29894	-1.58168	-1.02852	-2.835	-2.01811		1.34849	-0.437107	-0.623119	-1.65336	-3.33556	-1.83187	-0.296654	0.305069	-0.276436	-1.46022	-0.674488	-1.23837	-1.35436	-1.97395	-0.642635	2.48946	-1.19109	-1.1453	0.804565	2.77518	-1.87357	0.969479	-2.14606	-0.37656	0.660194	0.589573	-0.913273	-2.29259	-0.452972	0.83556	-0.0545502	-0.911812	-0.839722	-2.05938	-1.4079	-0.0420456
	1.35873	-1.61678	-1.27901	-2.54702	-0.0945473	-1.79146	-0.86544	-2.23574	-1.50959	-0.96999	-2.92491	-1.95007		1.35873	-0.433505	-0.568653	-1.61572	-3.31364	-1.77884	-0.368584	0.374687	-0.285603	-1.37203	-0.602581	-1.23099	-1.27197	-1.92288	-0.700912	2.62592	-1.11472	-1.16799	0.838318	2.60355	-1.8194	0.981129	-2.02182	-0.422859	0.696648	0.561878	-0.828613	-2.24341	-0.440361	0.857635	0.0118713	-0.809204	-0.70108	-2.04448	-1.48524	-0.105701
	1.36897	-1.52952	-1.27373	-2.49871	-0.073391	-1.68504	-0.722607	-2.18309	-1.39186	-0.825993	-2.83273	-1.80809		1.36897	-0.425269	-0.619034	-1.67113	-3.2281	-1.6982	-0.374733	0.378429	-0.292839	-1.38397	-0.541355	-1.15655	-1.29195	-1.94088	-0.732765	2.80984	-1.02602	-1.16384	0.855373	2.48587	-1.69146	1.05444	-1.97256	-0.402653	0.636623	0.500893	-0.799751	-2.16969	-0.458385	0.851166	0.0235291	-0.720051	-0.500713	-2.17142	-1.43271	-0.0940323
	1.37921	-1.43981	-1.17804	-2.36897	0.0230026	-1.60143	-0.650841	-2.16695	-1.37116	-0.670296	-2.67865	-1.73473		1.37921	-0.41115	-0.713551	-1.66341	-3.17507	-1.68851	-0.36174	0.420799	-0.332222	-1.3536	-0.559116	-1.08674	-1.35721	-1.93322	-0.695873	2.97673	-0.903229	-1.24922	0.804985	2.55166	-1.66641	1.11737	-2.01476	-0.27087	0.48735	0.354717	-0.798668	-2.12453	-0.444542	0.794575	0.0773087	-0.753464	-0.460804	-2.20844	-1.35536	-0.206196
	1.38945	-1.35497	-1.14907	-2.2678	0.055378	-1.41412	-0.592819	-2.09262	-1.34522	-0.558346	-2.54112	-1.644		1.38945	-0.411159	-0.795162	-1.62376	-3.13205	-1.64489	-0.394928	0.501167	-0.436531	-1.32952	-0.40313	-1.09825	-1.34607	-1.99236	-0.736336	3.11591	-0.836445	-1.36404	0.793003	2.55053	-1.70206	1.07403	-2.06321	-0.299503	0.3535	0.265285	-0.738487	-2.17899	-0.426376	0.769516	0.142776	-0.774181	-0.533974	-2.18302	-1.35735	-0.234497
	1.39969	-1.29971	-1.06708	-2.21901	0.123199	-1.38096	-0.547447	-2.04207	-1.41453	-0.493851	-2.42733	-1.52799		1.39969	-0.414858	-0.791801	-1.58746	-3.24122	-1.63425	-0.406635	0.567329	-0.546898	-1.35468	-0.279415	-1.06605	-1.28914	-2.10424	-0.733234	3.24619	-0.808743	-1.4669	0.85479	2.58335	-1.71522	1.10976	-2.05439	-0.404991	0.361313	0.301064	-0.704704	-2.12274	-0.542412	0.699936	0.21138	-0.725605	-0.560795	-2.18183	-1.30353	-0.312592
	1.40993	-1.27872	-0.979557	-2.21914	0.266582	-1.39608	-0.533119	-2.0515	-1.44667	-0.475842	-2.47663	-1.47527		1.40993	-0.405963	-0.872829	-1.5772	-3.42265	-1.63472	-0.304344	0.622406	-0.592293	-1.32943	-0.17424	-0.9282	-1.29678	-2.13045	-0.656773	3.3313	-0.787197	-1.42722	0.882957	2.60431	-1.65263	1.1573	-2.09396	-0.536144	0.321861	0.348579	-0.596844	-2.16039	-0.64378	0.656578	0.313938	-0.615028	-0.595772	-2.15014	-1.25625	-0.355507
	1.42017	-1.26923	-0.93898	-2.18307	0.35387	-1.3766	-0.48447	-2.14706	-1.48343	-0.436314	-2.51197	-1.48431		1.42017	-0.393345	-0.758469	-1.652	-3.46566	-1.73581	-0.309143	0.745785	-0.680592	-1.35974	-0.097477	-0.931789	-1.26925	-2.13381	-0.694454	3.5419	-0.816154	-1.35331	0.948967	2.54854	-1.55289	1.23628	-2.16487	-0.533401	0.296413	0.231144	-0.562729	-2.14182	-0.582253	0.623199	0.397934	-0.586178	-0.662243	-2.12224	-1.1919	-0.317635
	1.43041	-1.25565	-0.887711	-2.08355	0.297127	-1.32922	-0.48801	-2.11866	-1.46088	-0.417343	-2.49718	-1.57109		1.43041	-0.384297	-0.740303	-1.66923	-3.34346	-1.73781	-0.328495	0.862228	-0.717926	-1.39819	-0.0744133	-0.90313	-1.15149	-2.11102	-0.754486	3.61489	-0.733147	-1.19653	0.946114	2.51547	-1.61515	1.24105	-2.17227	-0.443676	0.301159	0.236954	-0.482903	-2.06302	-0.565159	0.523224	0.473236	-0.524261	-0.65551	-2.12658	-1.20707	-0.41819
	1.44065	-1.22431	-0.853542	-2.03426	0.258907	-1.29308	-0.457317	-2.06508	-1.52485	-0.347393	-2.40425	-1.52221		1.44065	-0.378324	-0.83736	-1.76852	-3.20419	-1.72185	-0.403343	0.917839	-0.795948	-1.42158	-0.0062027	-0.793316	-1.15314	-2.12844	-0.872456	3.83884	-0.72496	-1.14149	0.945938	2.53042	-1.67155	1.27512	-2.17052	-0.483562	0.322102	0.217793	-0.352608	-1.96548	-0.576714	0.507545	0.507011	-0.442268	-0.704887	-2.12959	-1.24197	-0.624023
	1.45089	-1.18264	-0.8745	-1.92787	0.340279	-1.30037	-0.448757	-1.98225	-1.57055	-0.183372	-2.42437	-1.45461		1.45089	-0.372567	-0.965309	-1.71738	-3.15696	-1.70741	-0.492908	0.913109	-0.787415	-1.39845	0.0401611	-0.606255	-1.17816	-2.23507	-0.93718	3.92731	-0.652683	-1.17152	0.967407	2.61308	-1.72163	1.40352	-2.18128	-0.592243	0.314629	0.0928383	-0.277283	-1.82484	-0.59124	0.572624	0.526299	-0.39476	-0.724804	-2.10786	-1.30136	-0.626671
	1.46113	-1.18892	-0.937763	-1.99141	0.445908	-1.34486	-0.414555	-1.97671	-1.50624	-0.141182	-2.447	-1.57538		1.46113	-0.364189	-1.04922	-1.72189	-3.03594	-1.69202	-0.545742	0.900116	-0.767982	-1.37155	0.0404358	-0.561749	-1.21857	-2.25288	-1.00661	4.06274	-0.525009	-1.16077	1.02879	2.55307	-1.68031	1.55286	-2.16545	-0.613392	0.236286	0.0115051	-0.224686	-1.76311	-0.557529	0.601208	0.575947	-0.438843	-0.684822	-2.04642	-1.37621	-0.613174
	1.47137	-1.17471	-0.95771	-2.06237	0.548325	-1.25447	-0.390018	-1.97047	-1.50451	-0.126369	-2.45763	-1.57191		1.47137	-0.356568	-1.19895	-1.70933	-2.84233	-1.74789	-0.568989	0.92112	-0.735191	-1.37551	0.0922089	-0.527275	-1.24855	-2.25008	-0.969173	4.20788	-0.407127	-1.20906	1.15461	2.43973	-1.50547	1.57256	-2.24765	-0.612152	0.202717	0.0171547	-0.219215	-1.81246	-0.618351	0.535095	0.651001	-0.487888	-0.679741	-1.96069	-1.41337	-0.643921
	1.48161	-1.13581	-0.923195	-2.08558	0.620232	-1.20404	-0.361839	-1.94241	-1.55581	0.0172081	-2.40951	-1.5131		1.48161	-0.35132	-1.35423	-1.77014	-2.71244	-1.86112	-0.543785	0.925014	-0.68343	-1.27574	0.211906	-0.446083	-1.32141	-2.18483	-0.935543	4.30973	-0.325836	-1.32964	1.17003	2.42364	-1.50595	1.51967	-2.20182	-0.642075	0.186218	0.00938416	-0.220207	-1.854	-0.604187	0.422634	0.667259	-0.466896	-0.626972	-1.86466	-1.42854	-0.651131
	1.49185	-1.14069	-0.880199	-2.19095	0.567493	-1.23249	-0.362949	-2.01269	-1.5911	0.0770416	-2.30714	-1.47396		1.49185	-0.346392	-1.45966	-1.8227	-2.72733	-1.8575	-0.626766	0.998699	-0.6595	-1.27902	0.329315	-0.410164	-1.35182	-2.16058	-0.925735	4.35215	-0.249493	-1.44837	1.17376	2.38242	-1.44487	1.42004	-2.19902	-0.563847	0.1008	-0.0547295	-0.258862	-1.88282	-0.585583	0.252163	0.746296	-0.394524	-0.649773	-1.86588	-1.41505	-0.723709
	Ipsilateral (bottom row)												Ipsilateral (bottom row)
	Click												Tone sustained
	Time re. EPSP peak (ms)	Mean Vmrel (mV)	Vm rel (mV)	Vm rel (mV)	Vm rel (mV)	Vm rel (mV)	Vm rel (mV)	Vm rel (mV)	Vm rel (mV)				Time re. EPSP peak (ms)	Mean Vmrel (mV)	Vm rel (mV)	Vm rel (mV)	Vm rel (mV)	Vm rel (mV)	Vm rel (mV)	Vm rel (mV)	Vm rel (mV)	Vm rel (mV)	Vm rel (mV)	Vm rel (mV)	Vm rel (mV)	Vm rel (mV)	Vm rel (mV)	Vm rel (mV)	Vm rel (mV)	Vm rel (mV)	Vm rel (mV)	Vm rel (mV)	Vm rel (mV)	Vm rel (mV)	Vm rel (mV)	Vm rel (mV)	Vm rel (mV)	Vm rel (mV)	Vm rel (mV)	Vm rel (mV)	Vm rel (mV)	Vm rel (mV)	Vm rel (mV)	Vm rel (mV)
	-0.99615	0.258884	0.164623	0.507828	0.0504227	0.0292969	0.417061	0.274105	0.368851				-0.99615	2.81685	6.89485	2.65469	5.79059	3.65201	4.31104	0.628624	3.12184	0.218151	4.75342	2.8036	2.46227	4.22546	3.1852	3.23241	3.74993	2.1342	2.79839	2.94543	2.92109	1.924	3.55991	0.750755	0.454914	-0.170578	3.14209	2.0947	0.622581	2.83119	4.25541	2.55744
	-0.98591	0.235571	0.21246	0.461559	-0.0221939	-0.0435181	0.409035	0.230164	0.401493				-0.98591	2.83239	6.91967	2.61445	5.81335	3.70967	4.19721	0.602028	3.0672	0.348541	4.73872	2.81994	2.39587	4.15263	3.15468	3.34929	3.79583	2.01818	2.82509	2.96799	2.93285	1.90102	3.51984	0.842297	0.485344	-0.0963707	3.14431	2.30104	0.770901	2.80553	4.33198	2.54261
	-0.97567	0.202087	0.120705	0.447372	0.0484047	-0.0539246	0.375313	0.153473	0.323265				-0.97567	2.85559	7.02836	2.56016	5.91136	3.81371	4.18787	0.58062	3.10906	0.515591	4.73681	2.83633	2.36283	4.14502	3.1768	3.36405	3.7342	1.87595	2.86514	3.03113	2.99348	1.89861	3.43217	0.958023	0.542233	-0.0859871	3.14172	2.47985	0.76326	2.83905	4.32045	2.54984
	-0.96543	0.21388	0.140472	0.449532	0.10162	-0.0820923	0.363571	0.18689	0.337166				-0.96543	2.89324	7.00126	2.56195	5.92938	3.84612	4.2315	0.756897	3.20401	0.620457	4.8022	2.85321	2.35865	4.1563	3.13665	3.27428	3.60999	1.9452	2.90509	3.04024	3.0334	1.90141	3.53065	0.999081	0.657173	-0.0348701	3.21804	2.62019	0.811684	2.9201	4.30059	2.60637
	-0.95519	0.226013	0.19173	0.507637	0.116306	-0.131245	0.406796	0.146133	0.344734				-0.95519	2.90736	6.96201	2.56114	5.96779	3.8424	4.20786	0.865185	3.17033	0.714489	4.7663	2.87542	2.3373	4.16719	3.09574	3.2254	3.57632	2.01248	2.97153	3.05045	3.05817	1.949	3.50986	1.04186	0.757523	0.0341148	3.14609	2.71484	0.810524	2.86698	4.38466	2.57795
	-0.94495	0.274266	0.296684	0.491718	0.0821648	-0.125294	0.536484	0.17931	0.458794				-0.94495	2.93977	6.93853	2.69231	5.97623	3.9521	4.26048	0.909206	3.20414	0.833023	4.82586	2.86012	2.31811	4.0542	3.0788	3.30888	3.66695	2.13396	3.06945	3.07232	2.97052	1.9335	3.44109	1.09262	0.935947	0.114857	3.10327	2.81829	0.780689	2.77158	4.45773	2.6184
	-0.93471	0.288107	0.319	0.424175	0.0742378	0.0108185	0.541374	0.204449	0.442692				-0.93471	2.97826	7.02123	2.77354	5.96664	4.07543	4.31331	0.983475	3.27715	0.941429	4.83414	2.90397	2.36051	4.02171	3.1413	3.30275	3.64269	2.25079	3.10075	3.05549	2.90004	1.97021	3.47583	1.26147	1.0238	0.187958	3.0627	2.84761	0.683327	2.81758	4.56011	2.59071
	-0.92447	0.296616	0.291199	0.44281	0.0593719	0.0511131	0.55006	0.207611	0.474148				-0.92447	3.01483	6.94336	2.84829	5.96665	4.10096	4.41669	1.10448	3.21297	1.0065	4.84066	3.07952	2.40333	3.98283	3.08865	3.3045	3.69066	2.39497	3.07902	3.0879	2.92472	2.0025	3.4419	1.25247	1.11923	0.28299	2.96528	3.02562	0.780357	2.7429	4.69092	2.66415
	-0.91423	0.30983	0.263268	0.558262	0.0258026	0.0311584	0.536114	0.204273	0.549931				-0.91423	3.06603	6.88327	2.95177	5.9626	4.19132	4.43908	1.27522	3.14838	1.07473	4.85447	3.18458	2.36202	3.98345	2.98411	3.29356	3.79815	2.43361	3.27731	3.24975	2.98992	1.994	3.59575	1.32479	1.30627	0.521721	2.97205	3.01189	0.760185	2.75806	4.77646	2.62245
	-0.903989	0.335203	0.374798	0.574753	-0.00469971	0.0365219	0.472851	0.235649	0.656551				-0.903989	3.09867	6.73207	2.97034	5.9341	4.26929	4.39862	1.44197	3.16343	1.14068	4.78473	3.24597	2.30411	4.041	2.96429	3.39389	3.83545	2.57463	3.42833	3.4165	3.06379	1.90642	3.71021	1.3158	1.42982	0.67395	2.96944	3.00355	0.777313	2.71623	4.79876	2.55549
	-0.893749	0.344872	0.387783	0.582367	-0.0606499	0.0419426	0.439316	0.234776	0.788567				-0.893749	3.14903	6.71131	2.95205	5.94641	4.41545	4.40205	1.54453	3.13701	1.28297	4.85128	3.33742	2.41104	4.10867	2.96933	3.38496	3.9085	2.66669	3.46313	3.42456	3.13539	2.0118	3.77883	1.32269	1.5025	0.756668	2.93378	3.12368	0.799438	2.75866	4.88937	2.54061
	-0.883509	0.357382	0.451046	0.563354	-0.0319519	0.061245	0.475624	0.259308	0.723045				-0.883509	3.1693	6.69078	2.92113	5.8937	4.46182	4.46326	1.58882	3.09253	1.34655	4.9941	3.38864	2.40224	4.08535	2.88843	3.33097	3.88372	2.55267	3.53644	3.34119	3.02641	2.07562	3.92214	1.50455	1.59797	0.764366	2.90441	3.185	0.929176	2.68665	4.91731	2.70313
	-0.873269	0.331779	0.378078	0.676254	-0.0428009	-0.0195084	0.477119	0.197914	0.655396				-0.873269	3.20364	6.49149	2.98139	5.90136	4.48592	4.49921	1.74364	3.07673	1.46658	4.99962	3.33613	2.39536	4.05322	2.82518	3.26673	3.89542	2.68763	3.57362	3.47496	3.07736	2.06842	3.90813	1.61097	1.73542	0.836502	2.88643	3.28249	0.973816	2.70972	5.01361	2.85217
	-0.863029	0.384596	0.43259	0.844936	-0.0429916	0.0562973	0.547199	0.218842	0.635296				-0.863029	3.24072	6.4723	2.85539	5.88879	4.53298	4.53325	1.76734	3.15877	1.50995	5.00334	3.40674	2.41313	4.08641	2.8519	3.24141	3.90632	2.69084	3.73008	3.57829	3.13935	2.04209	3.90732	1.63013	1.83046	0.960037	2.95805	3.35356	0.965107	2.72214	5.20278	2.88324
	-0.852789	0.413023	0.474743	0.9412	-0.126858	0.0590134	0.595955	0.245422	0.701683				-0.852789	3.2923	6.61175	2.92062	5.85057	4.60028	4.46519	1.82072	3.05366	1.63976	5.0618	3.437	2.52612	4.12924	2.80804	3.32365	4.10565	2.68537	3.76099	3.66652	3.21992	2.00576	3.81406	1.63821	1.97391	1.18486	2.86939	3.4487	1.02111	2.88107	5.30479	2.94027
	-0.842549	0.430156	0.473804	0.903683	-0.188606	0.120312	0.694008	0.206966	0.800926				-0.842549	3.32448	6.63925	2.98032	5.94062	4.64586	4.44076	2.03519	3.05837	1.77636	5.02368	3.44791	2.50819	4.10014	2.83429	3.40848	4.15711	2.58426	3.75251	3.66182	3.25645	2.08463	3.77487	1.63206	2.08471	1.34449	2.82993	3.5028	1.11148	2.95393	5.32374	2.84022
	-0.832309	0.464375	0.479797	0.924927	-0.206284	0.212791	0.790436	0.205021	0.843933				-0.832309	3.34355	6.54505	2.95612	5.92696	4.60757	4.45503	2.13166	3.04486	1.92876	4.92867	3.47293	2.48944	4.12555	2.77208	3.39488	4.16438	2.64368	3.76066	3.65123	3.26054	2.08592	3.81541	1.68336	2.30912	1.41576	2.91239	3.52065	1.14263	3.04705	5.31981	2.79441
	-0.822069	0.517092	0.524517	0.999241	-0.111702	0.330093	0.767155	0.217052	0.893288				-0.822069	3.3892	6.48079	2.90288	5.84875	4.60001	4.63086	2.18849	3.08284	2.13573	4.93621	3.41615	2.58485	4.33811	2.7253	3.4563	4.1104	2.75623	3.80522	3.70197	3.32993	2.10795	3.8005	1.83668	2.46496	1.47174	2.93649	3.60081	1.22971	3.0723	5.34031	2.78349
	-0.811829	0.567394	0.628071	1.09625	-0.0678711	0.36282	0.72226	0.260193	0.970036				-0.811829	3.44409	6.37006	3.05122	5.85923	4.58809	4.75547	2.27041	3.12651	2.23426	4.99932	3.46979	2.73618	4.36211	2.71493	3.51729	4.14144	2.80553	3.94175	3.71004	3.42071	2.22678	3.80326	1.92163	2.59414	1.6149	2.92847	3.61864	1.27727	2.98716	5.43404	2.84211
	-0.801589	0.616511	0.656731	1.25511	-0.114769	0.353653	0.70713	0.304726	1.153				-0.801589	3.48301	6.32263	3.21393	5.926	4.71115	4.77698	2.29882	3.23837	2.25172	4.90992	3.58717	2.74128	4.32153	2.64334	3.46965	4.17694	2.83761	3.96003	3.7852	3.43429	2.37163	3.68856	1.96125	2.70173	1.79568	2.92138	3.66227	1.29616	3.05366	5.49043	2.94094
	-0.791349	0.642533	0.66238	1.32646	-0.203949	0.284618	0.759357	0.28022	1.38864				-0.791349	3.53132	6.32399	3.17	5.87575	4.72821	4.85077	2.46221	3.24143	2.32979	4.85101	3.71643	2.72158	4.31591	2.63042	3.48898	4.2894	2.89455	4.05557	3.90054	3.58501	2.48875	3.63576	2.00511	2.8252	1.92971	2.93042	3.72517	1.37502	3.04496	5.51958	3.02829
	-0.781109	0.654177	0.668259	1.3722	-0.304001	0.273685	0.876266	0.261097	1.43173				-0.781109	3.58526	6.27032	3.23539	5.80912	4.77507	4.81551	2.69761	3.2699	2.43496	4.89546	3.69458	2.78321	4.3596	2.60298	3.56408	4.37506	3.03676	4.1731	3.99372	3.6101	2.45421	3.76992	2.06379	3.1202	2.03116	2.93677	3.75849	1.43605	2.95972	5.50804	3.12288
	-0.770869	0.697212	0.694138	1.36159	-0.214748	0.393326	0.855274	0.395412	1.39549				-0.770869	3.63509	6.26667	3.29957	5.80733	4.82718	4.72706	2.9137	3.29152	2.58443	4.9454	3.71306	2.87281	4.34491	2.63335	3.71246	4.36913	3.05657	4.2359	4.1182	3.6833	2.42786	3.89323	2.01591	3.2572	2.10128	2.89332	3.87031	1.52768	2.96294	5.50835	3.19198
	-0.760629	0.729832	0.705811	1.30432	-0.135464	0.46249	0.808983	0.528221	1.43446				-0.760629	3.66968	6.28259	3.30862	5.79602	4.92977	4.72325	2.97261	3.20351	2.77886	4.99786	3.79692	2.91084	4.32036	2.58764	3.62262	4.45443	3.03334	4.1797	4.214	3.72457	2.48724	4.00312	2.09808	3.36036	2.27359	2.76501	3.87241	1.64816	2.98242	5.59563	3.16691
	-0.750389	0.756741	0.748734	1.34675	-0.102001	0.527924	0.737732	0.557953	1.4801				-0.750389	3.6997	6.3049	3.37031	5.83995	4.98001	4.76567	2.94736	3.28456	2.835	4.94516	3.80683	2.85294	4.32778	2.495	3.51648	4.45273	3.09546	4.24731	4.30487	3.84906	2.57803	4.03703	2.15877	3.41262	2.38862	2.81069	3.95844	1.62989	3.04305	5.60311	3.14946
	-0.740149	0.812067	0.741104	1.4414	-0.0553665	0.635929	0.793247	0.615173	1.51298				-0.740149	3.74247	6.23497	3.32932	5.87458	4.94904	4.79905	3.08593	3.40702	2.89552	4.96334	3.7822	2.88923	4.32886	2.52428	3.56981	4.44848	3.09107	4.31403	4.40014	3.87315	2.62594	3.9659	2.23557	3.57784	2.58886	2.89587	3.98159	1.66919	3.14965	5.65495	3.16886
	-0.729909	0.875227	0.766678	1.5719	-0.0276604	0.684147	0.90694	0.681633	1.54295				-0.729909	3.78715	6.34978	3.43686	5.94512	5.00831	4.83069	3.16411	3.42874	2.96079	4.87627	3.83704	2.9225	4.32913	2.54669	3.73051	4.43836	3.09756	4.49286	4.41719	3.95893	2.5846	3.95276	2.24795	3.62801	2.58674	2.95032	4.07213	1.71849	3.15355	5.65902	3.28954
	-0.719669	0.895221	0.784489	1.63333	-0.131538	0.66684	0.936321	0.735207	1.6419				-0.719669	3.83626	6.32784	3.43795	5.90961	5.08966	4.89448	3.36279	3.36353	2.9993	4.75996	3.90849	3.05248	4.24835	2.63955	3.86497	4.47836	3.13457	4.64469	4.41943	4.07246	2.59647	4.01791	2.25266	3.60428	2.62873	2.98978	4.21817	1.78174	3.27843	5.73364	3.3776
	-0.709429	0.961134	0.930565	1.70978	-0.115246	0.759476	0.976593	0.796696	1.67008				-0.709429	3.87357	6.27272	3.47341	5.84908	5.03375	4.93908	3.5004	3.45203	3.08527	4.78471	3.96839	3.02314	4.30654	2.50705	3.98692	4.51481	3.23639	4.61718	4.43745	4.19096	2.59391	4.10714	2.22264	3.68604	2.7183	3.00304	4.2633	1.81884	3.42849	5.76925	3.41699
	-0.699189	1.07514	1.0972	1.88252	-0.0381279	0.943153	1.04614	0.834316	1.76077				-0.699189	3.92232	6.19646	3.49442	5.89651	4.99742	4.89262	3.68737	3.56535	3.28295	4.92941	4.00525	3.04676	4.44655	2.53349	3.98743	4.57635	3.32533	4.68409	4.41767	4.1842	2.53765	4.27123	2.3101	3.81555	2.78314	2.96256	4.34321	1.74144	3.44473	5.75652	3.55386
	-0.688949	1.12437	1.22295	1.98698	0.00447845	0.903721	1.11801	0.87027	1.76415				-0.688949	3.97192	6.16287	3.62297	5.94964	5.12151	4.85844	3.69701	3.52671	3.30171	5.01706	4.00645	3.06817	4.50352	2.65355	3.9891	4.64265	3.4113	4.76772	4.42524	4.11784	2.69215	4.28694	2.43914	4.00312	2.88999	2.99483	4.50611	1.8409	3.42895	5.68231	3.54969
	-0.678709	1.15954	1.14162	2.03505	-0.0309906	0.956467	1.13914	0.969383	1.90609				-0.678709	4.01703	6.1892	3.68315	5.98198	5.25276	4.91981	3.74349	3.551	3.42507	4.92693	3.99334	3.27348	4.50761	2.64262	4.03192	4.6658	3.49994	4.73244	4.41832	4.18664	2.67133	4.32031	2.53818	4.11617	3.00185	3.04656	4.61959	1.86419	3.48861	5.64607	3.57244
	-0.668469	1.20841	1.07668	2.08933	-0.0939407	1.09695	1.14593	1.07376	2.07014				-0.668469	4.03555	6.27706	3.68457	5.98256	5.22849	4.97561	3.7992	3.64389	3.49799	4.79697	4.03282	3.44052	4.55612	2.6599	3.9744	4.76824	3.56197	4.68306	4.38443	4.21012	2.70462	4.26879	2.52963	4.071	3.03744	2.93874	4.49475	1.9426	3.58044	5.71388	3.62667
	-0.658229	1.28866	1.1555	2.21179	-0.123245	1.194	1.21019	1.22122	2.15118				-0.658229	4.06105	6.36665	3.69199	5.98798	5.14613	4.92301	3.88722	3.55627	3.62179	4.77091	4.18884	3.55698	4.56843	2.71003	3.96989	4.6833	3.54585	4.71512	4.35915	4.2984	2.79438	4.35499	2.50306	4.04504	3.16924	2.93541	4.37997	2.08818	3.63628	5.74927	3.62762
	-0.647989	1.36624	1.21496	2.33187	0.0149536	1.24312	1.26045	1.26884	2.22947				-0.647989	4.12412	6.29837	3.77879	6.05772	5.22527	4.86787	4.0804	3.58678	3.73157	4.786	4.26774	3.56666	4.56764	2.7141	3.99313	4.71631	3.59685	4.76441	4.48308	4.40001	2.81295	4.41516	2.61695	4.19959	3.22507	2.99946	4.46608	2.22653	3.64577	5.82452	3.80871
	-0.637749	1.44952	1.28595	2.56222	0.10981	1.34483	1.27948	1.30122	2.2631				-0.637749	4.17846	6.18629	3.8722	6.05114	5.17196	4.87382	4.16623	3.59684	3.84089	4.7538	4.30623	3.47278	4.60602	2.70972	4.09885	4.82766	3.65442	4.83789	4.50947	4.49289	2.94109	4.41527	2.69949	4.35263	3.34965	3.14783	4.62666	2.36871	3.68674	5.86004	3.87671
	-0.627509	1.53831	1.44981	2.65084	0.209518	1.381	1.31381	1.37589	2.38734				-0.627509	4.2322	6.14642	3.96876	5.9285	5.19507	4.97479	4.2188	3.63892	3.9404	4.65171	4.37545	3.53049	4.82117	2.84251	4.12241	4.84243	3.67762	4.92188	4.49431	4.6188	2.99789	4.44118	2.79487	4.47009	3.45459	3.1789	4.72103	2.49654	3.77838	5.79795	3.92422
	-0.617269	1.6231	1.50583	2.83421	0.169735	1.49092	1.42222	1.44293	2.49586				-0.617269	4.27936	6.03085	4.12508	5.94302	5.09372	5.01108	4.32452	3.56486	4.04515	4.60847	4.42763	3.66432	4.85621	3.03075	4.18057	4.88344	3.66944	5.0293	4.52443	4.70102	3.05856	4.45473	2.79533	4.56593	3.62548	3.12104	4.78981	2.5415	3.86584	5.87358	3.97527
	-0.607029	1.68476	1.54121	2.94059	0.158829	1.52814	1.55811	1.51997	2.54646				-0.607029	4.32372	6.03234	4.10061	5.95961	5.036	5.02034	4.42791	3.69093	4.19197	4.69732	4.43823	3.67187	4.78476	3.1063	4.26668	4.91385	3.65823	5.11921	4.47807	4.69134	3.0514	4.47654	2.87231	4.74014	3.86662	3.14132	4.77193	2.65114	3.93724	5.91734	4.00006
	-0.596789	1.78352	1.74069	3.07621	0.199814	1.6692	1.63126	1.52597	2.64152				-0.596789	4.37592	6.1116	4.13247	5.86761	5.06378	5.0403	4.58733	3.78648	4.33078	4.65627	4.55635	3.75703	4.74921	3.17217	4.32102	5.01084	3.6482	5.08456	4.56063	4.77188	3.08045	4.48825	2.92735	4.70868	4.01179	3.14172	4.8287	2.78901	4.03854	5.92588	4.12885
	-0.586549	1.87772	1.83522	3.15396	0.293045	1.77248	1.74141	1.6696	2.67833				-0.586549	4.43973	6.22146	4.24398	5.92955	5.18764	5.06684	4.70444	3.88385	4.35247	4.64626	4.67643	3.83929	4.79209	3.28585	4.38866	5.14029	3.61203	5.09691	4.63263	4.89165	3.12203	4.56017	3.02733	4.79042	4.06042	3.14956	4.83398	2.8604	4.06535	5.89547	4.23454
	-0.576309	1.96297	1.94128	3.20881	0.32217	1.90759	1.80039	1.7818	2.77876				-0.576309	4.51367	6.24878	4.35349	5.98045	5.3914	5.07263	4.87755	3.93478	4.39411	4.73827	4.7819	3.9831	4.91942	3.4146	4.48529	5.15377	3.64677	5.10233	4.69106	4.88509	3.19848	4.59729	3.06824	4.91523	4.21978	3.22826	4.86467	2.90218	4.14638	5.89133	4.32348
	-0.566069	2.02116	1.9834	3.3346	0.254471	2.02288	1.85779	1.8645	2.83051				-0.566069	4.56776	6.11925	4.55777	6.00668	5.3727	5.14629	4.94835	4.03802	4.47509	4.76485	4.89884	4.05729	4.9183	3.37457	4.57245	5.16313	3.75876	5.09013	4.79765	4.8979	3.24473	4.6184	3.18584	4.90535	4.42278	3.26693	4.98155	3.00559	4.16949	5.88473	4.38934
	-0.555829	2.09744	2.00989	3.42989	0.35804	2.09215	1.92528	2.00409	2.86276				-0.555829	4.61555	6.13673	4.70931	6.00404	5.37119	5.19386	4.99233	4.14022	4.51613	4.7126	4.86121	4.08656	4.90274	3.49878	4.57532	5.15251	3.81252	5.1683	4.8143	5.05688	3.35997	4.74914	3.32748	4.90954	4.44133	3.27348	4.97504	3.05948	4.22144	5.93754	4.50649
	-0.545589	2.15058	1.91703	3.59661	0.394817	2.05148	2.0346	2.09234	2.96721				-0.545589	4.65931	6.17323	4.76614	5.8781	5.33725	5.25229	5.01986	4.27818	4.62522	4.66965	4.81113	4.17777	4.95481	3.52399	4.5917	5.19763	3.89399	5.2634	4.84473	5.22483	3.45218	4.9202	3.44196	4.94752	4.35197	3.24099	5.00467	3.10971	4.35681	5.94825	4.52106
	-0.535349	2.24332	1.98927	3.67112	0.514526	2.16492	2.07142	2.26183	3.03013				-0.535349	4.70064	6.18713	4.82986	5.87537	5.42393	5.26076	5.0314	4.3167	4.82585	4.66853	4.77515	4.21234	4.92579	3.57084	4.60055	5.16409	3.91936	5.37745	4.89116	5.39511	3.49766	5.00315	3.39757	5.02811	4.43571	3.21327	5.06024	3.20091	4.46068	5.90546	4.56501
	-0.525109	2.38201	2.14482	3.80172	0.621838	2.36786	2.11361	2.49195	3.13228				-0.525109	4.75383	6.24301	4.87656	5.96926	5.38381	5.24232	5.07087	4.27159	5.02668	4.73278	4.87785	4.15456	4.95313	3.66156	4.62057	5.16853	3.94933	5.49076	4.86697	5.51904	3.60345	4.99197	3.4059	5.14275	4.58279	3.20929	5.10785	3.34765	4.56684	5.95437	4.62281
	-0.514868	2.47788	2.14321	3.9483	0.722977	2.51048	2.18279	2.68593	3.15148				-0.514868	4.79062	6.26674	4.88002	6.05417	5.33566	5.25314	5.14486	4.31455	5.11684	4.7126	4.8495	4.22084	5.01909	3.72728	4.77847	5.1481	4.10324	5.45287	4.86116	5.54454	3.67528	4.99732	3.52055	5.21701	4.66536	3.22179	5.16989	3.32579	4.62346	5.928	4.59059
	-0.504628	2.58657	2.21694	4.06218	0.8815	2.60702	2.29559	2.90459	3.13819				-0.504628	4.84019	6.19904	5.05353	6.17926	5.382	5.17731	5.24894	4.37915	5.16731	4.70335	4.99424	4.29599	5.02573	3.88953	4.78428	5.23679	4.2021	5.52091	4.86893	5.44258	3.82316	5.01578	3.50654	5.40156	4.76293	3.17535	5.21353	3.32831	4.69262	5.84277	4.69223
	-0.494388	2.67775	2.39709	4.0522	0.945358	2.71038	2.42767	2.94352	3.26803				-0.494388	4.8955	6.09289	5.12362	6.15657	5.51494	5.20325	5.35114	4.40682	5.20669	4.78817	5.10691	4.30059	5.04291	4.0156	4.98573	5.35728	4.20797	5.58265	4.95889	5.54272	3.83309	5.06568	3.59522	5.45354	4.75974	3.241	5.26467	3.35185	4.74896	5.80851	4.79754
	-0.484148	2.75969	2.4689	4.17061	0.964027	2.88184	2.52571	2.94451	3.36226				-0.484148	4.95178	6.13657	5.16691	6.1473	5.59225	5.15613	5.45802	4.53553	5.26115	4.81786	5.12868	4.39257	4.94289	3.98409	5.05731	5.46391	4.27551	5.63043	5.02965	5.64842	3.89572	5.2727	3.73944	5.40699	4.96974	3.25684	5.29372	3.44991	4.77214	5.8344	4.83668
	-0.473908	2.81867	2.53647	4.31784	0.952812	2.97261	2.58196	2.99351	3.37553				-0.473908	5.00399	6.25658	5.31722	6.06829	5.71706	5.07819	5.66985	4.6151	5.34605	4.7783	5.11629	4.45456	4.95046	4.14602	5.07801	5.47325	4.33073	5.63874	5.10685	5.68382	3.92365	5.32982	3.95542	5.38088	5.10371	3.34997	5.28326	3.53053	4.80977	5.84703	4.78037
	-0.463668	2.88389	2.53954	4.40308	1.00116	3.12624	2.5435	3.13737	3.43635				-0.463668	5.06406	6.32541	5.40179	6.08326	5.77563	5.05303	5.79303	4.78382	5.28211	4.71731	5.18831	4.48675	5.0685	4.29678	5.10291	5.50417	4.33942	5.62243	5.21773	5.79707	4.08516	5.37553	4.00897	5.56232	5.08677	3.46765	5.27228	3.64445	4.88009	5.84328	4.85581
	-0.453428	2.96977	2.65989	4.52954	1.01914	3.24641	2.5835	3.26534	3.4846				-0.453428	5.1271	6.31273	5.58817	6.15811	5.78609	5.16101	5.79926	4.79252	5.4855	4.71421	5.23059	4.56171	5.22921	4.27393	5.26728	5.51229	4.40279	5.50322	5.26118	5.81233	4.12167	5.38368	4.05122	5.74807	5.15718	3.52989	5.2603	3.76966	5.03832	5.94392	4.95711
	-0.443188	3.09189	2.84731	4.59095	1.20253	3.30562	2.68526	3.43674	3.57485				-0.443188	5.1891	6.3964	5.67615	6.15383	5.76362	5.20874	5.80854	4.91085	5.62399	4.79526	5.266	4.65582	5.34355	4.31453	5.44219	5.4301	4.53497	5.61572	5.28008	5.80365	4.18612	5.35104	4.10739	5.73542	5.25236	3.59015	5.34549	3.85898	5.17498	5.92154	5.12554
	-0.432948	3.20788	2.92365	4.74693	1.38588	3.34135	2.82154	3.59256	3.64322				-0.432948	5.24739	6.44915	5.8178	6.18185	5.7537	5.22689	5.76506	5.06892	5.59102	4.83352	5.23861	4.61131	5.30526	4.39168	5.54324	5.46052	4.59892	5.71967	5.38573	5.89482	4.38965	5.3714	4.27253	5.83433	5.37041	3.65492	5.43076	3.93387	5.26561	5.87178	5.18867
	-0.422708	3.29612	2.90622	4.87872	1.44553	3.48959	2.84278	3.81098	3.69902				-0.422708	5.31201	6.48808	5.82246	6.21497	5.78742	5.22549	5.79476	5.16196	5.62383	4.91925	5.27017	4.65772	5.42274	4.55383	5.54204	5.46656	4.63377	5.86118	5.52486	5.97584	4.44979	5.51483	4.337	5.89591	5.40121	3.80482	5.48081	3.96994	5.44603	5.8773	5.23566
	-0.412468	3.39618	3.04696	4.86665	1.5487	3.57316	2.97844	4.0369	3.72245				-0.412468	5.37608	6.54984	5.95275	6.2887	5.73793	5.32189	5.92956	5.30687	5.6559	4.95924	5.28954	4.7464	5.52697	4.64574	5.57798	5.54095	4.61982	5.93881	5.55857	6.09047	4.58792	5.48568	4.47894	6.06154	5.42636	3.83102	5.46138	3.94099	5.46152	6.01393	5.29508
	-0.402228	3.5036	3.15948	4.9905	1.57423	3.7086	3.10797	4.1447	3.83974				-0.402228	5.42563	6.50968	6.04119	6.34073	5.76808	5.38948	5.98446	5.38118	5.80234	4.92991	5.4754	4.77584	5.50805	4.71978	5.56633	5.54524	4.62363	5.92667	5.60682	6.10303	4.55676	5.6112	4.65631	6.13023	5.54716	3.92728	5.41103	4.00565	5.49123	5.99017	5.44417
	-0.391988	3.59947	3.30591	5.16904	1.63507	3.86807	3.12025	4.19237	3.90561				-0.391988	5.49158	6.62037	6.1261	6.28706	5.84068	5.47658	6.02684	5.45913	5.96873	4.94705	5.61009	4.93794	5.56255	4.78667	5.57141	5.48832	4.67258	5.90572	5.6357	6.11125	4.61545	5.63306	4.8778	6.18908	5.6048	3.98183	5.44866	4.06924	5.63842	6.06696	5.58741
	-0.381748	3.66549	3.42284	5.32013	1.69949	3.99578	3.16579	4.24677	3.80767				-0.381748	5.55256	6.66533	6.18803	6.36822	5.94148	5.51469	6.01157	5.5206	6.11198	4.91365	5.65791	5.12141	5.66736	4.89837	5.70454	5.48575	4.77932	6.01374	5.66095	6.11373	4.74584	5.73234	4.88233	6.16999	5.58757	4.03417	5.44642	4.21873	5.76336	6.05267	5.60479
	-0.371508	3.73672	3.51477	5.29778	1.79651	4.17902	3.2088	4.37788	3.78224				-0.371508	5.61263	6.76991	6.26059	6.45841	5.9761	5.48048	6.14593	5.57661	6.24826	4.98514	5.59311	5.20889	5.81354	5.07916	5.82508	5.5358	4.88979	6.07171	5.699	6.08076	4.86598	5.83167	4.87669	6.12956	5.59969	4.04264	5.49993	4.32626	5.86582	5.99517	5.64735
	-0.361268	3.82996	3.55067	5.27899	1.88783	4.27525	3.472	4.55329	3.79167				-0.361268	5.65664	6.88164	6.34067	6.49596	5.99342	5.38082	6.25125	5.56718	6.28198	4.93465	5.632	5.19122	5.77488	5.25589	5.93462	5.49554	4.97459	6.11093	5.71264	6.11736	4.919	5.82656	4.94719	6.14697	5.61618	4.16161	5.62167	4.46746	5.93652	5.91435	5.81458
	-0.351028	3.97229	3.69444	5.42524	2.09919	4.4498	3.63057	4.59486	3.91194				-0.351028	5.71456	7.00702	6.50256	6.45363	6.13705	5.49474	6.3596	5.59414	6.31153	4.89309	5.7051	5.17534	5.78295	5.38727	5.98867	5.59343	5.00697	6.13054	5.70177	6.17653	4.96013	5.87553	5.02997	6.25107	5.71024	4.221	5.67953	4.50543	6.01669	5.96941	5.81588
	-0.340788	4.04161	3.77333	5.55268	2.13766	4.60801	3.63535	4.66013	3.92414				-0.340788	5.76197	7.0894	6.5747	6.33987	6.16222	5.61071	6.52657	5.70002	6.45474	4.80241	5.77882	5.31363	5.91836	5.44062	6.05887	5.68958	5.03404	6.07449	5.81573	6.28323	5.00505	5.92888	5.15942	6.34955	5.72651	4.06577	5.68101	4.54684	6.06099	5.89512	5.77184
	-0.330548	4.12193	3.8159	5.67446	2.16756	4.72383	3.68724	4.83491	3.94962				-0.330548	5.81257	7.10367	6.6954	6.43004	6.06541	5.58542	6.52721	5.8055	6.52257	4.71362	5.9193	5.46362	5.99898	5.52502	6.139	5.69516	5.07001	6.11441	5.85236	6.24599	5.10249	6.01523	5.38505	6.32113	5.73368	4.0731	5.77847	4.59548	6.14918	5.91238	5.83829
	-0.320308	4.20252	3.82967	5.79544	2.29427	4.7718	3.76241	4.90412	4.05993				-0.320308	5.85812	7.09834	6.74808	6.435	6.10883	5.60905	6.41248	5.91014	6.55781	4.70324	5.94654	5.56804	6.09983	5.66682	6.10744	5.64499	5.10729	6.14626	5.88988	6.26565	5.23932	6.00002	5.53267	6.38483	5.82861	4.16435	5.83438	4.69726	6.22018	5.89299	5.92335
	-0.310068	4.2906	3.82381	5.81245	2.39766	4.84703	3.84985	5.10334	4.20006				-0.310068	5.92317	7.11494	6.78353	6.41727	6.10678	5.6722	6.34489	6.089	6.48262	4.72681	5.97269	5.60835	6.26176	5.83174	6.16998	5.77625	5.10946	6.27777	6.07873	6.16796	5.42186	6.09451	5.64303	6.51452	5.76003	4.38087	5.83332	4.85259	6.23437	6.00021	5.96697
	-0.299828	4.38135	3.85341	5.85954	2.47461	4.9953	3.99754	5.17895	4.31009				-0.299828	5.97962	7.23689	6.90405	6.39336	6.1876	5.7449	6.36829	6.2034	6.61441	4.70799	6.09129	5.6422	6.31053	5.8138	6.28152	5.78179	5.10303	6.34067	6.08881	6.17458	5.51836	6.09085	5.79326	6.5593	5.79586	4.47958	5.83337	4.96394	6.30538	6.04197	6.01774
	-0.289588	4.46765	3.8511	5.90581	2.49714	5.13956	4.18883	5.23515	4.45593				-0.289588	6.05754	7.31085	7.04364	6.52439	6.22165	5.83463	6.50239	6.36578	6.68155	4.77364	6.18689	5.66239	6.33228	5.97359	6.33169	5.79887	5.17169	6.35353	6.12248	6.18542	5.55682	6.23521	6.04218	6.61127	5.90148	4.46976	5.80563	5.0827	6.45009	6.06559	6.12804
	-0.279348	4.52291	3.99161	6.00607	2.5811	5.20256	4.20945	5.28395	4.38564				-0.279348	6.11184	7.39713	7.13105	6.63786	6.2054	5.88635	6.58631	6.45232	6.71227	4.78938	6.26731	5.74146	6.36219	6.18036	6.37594	5.90826	5.257	6.37085	6.11268	6.19931	5.53517	6.32058	6.11303	6.71117	5.92579	4.50555	5.84498	5.15409	6.51934	6.04281	6.10915
	-0.269108	4.60561	4.11723	6.07761	2.66647	5.37436	4.20216	5.34506	4.45642				-0.269108	6.15513	7.42956	7.28147	6.67849	6.23494	5.91194	6.5372	6.48819	6.7524	4.8716	6.32393	5.73069	6.39384	6.36798	6.31846	5.97156	5.47099	6.34254	6.19471	6.16924	5.59534	6.30884	6.23397	6.69255	5.92968	4.59079	5.89678	5.24151	6.56199	6.02473	6.10786
	-0.258868	4.67961	4.27177	6.15378	2.71533	5.4669	4.24028	5.48292	4.42628				-0.258868	6.20327	7.47203	7.37935	6.70959	6.18464	5.98744	6.53093	6.61734	6.87846	4.98087	6.37904	5.7667	6.47981	6.45753	6.29761	5.95425	5.523	6.44719	6.17264	6.14664	5.73738	6.30073	6.3898	6.70653	5.98831	4.65716	5.90257	5.29684	6.52011	5.9467	6.28691
	-0.248628	4.75042	4.24022	6.19233	2.78096	5.54764	4.31218	5.70322	4.47639				-0.248628	6.24844	7.49075	7.45781	6.63623	6.26094	5.99231	6.6707	6.74931	6.84175	4.8992	6.38997	5.79111	6.585	6.49783	6.29742	5.90075	5.51291	6.51561	6.18134	6.21582	5.83882	6.27354	6.46145	6.84353	6.02663	4.81959	6.01185	5.41229	6.56462	5.94656	6.36762
	-0.238388	4.83529	4.26241	6.28785	2.95172	5.5631	4.36684	5.7505	4.66463				-0.238388	6.26495	7.45374	7.54677	6.56682	6.31166	6.02419	6.68739	6.83371	6.85627	4.76131	6.41906	5.87761	6.63826	6.54224	6.22366	5.94398	5.54919	6.54055	6.22905	6.16483	5.89843	6.29196	6.52212	6.7887	6.01014	4.9615	5.98771	5.37477	6.62766	5.98914	6.3261
	-0.228148	4.90587	4.32928	6.34647	3.16608	5.62472	4.35746	5.82338	4.69373				-0.228148	6.30729	7.56498	7.60462	6.71084	6.38417	6.03621	6.74684	6.93417	6.9233	4.78075	6.52506	5.9354	6.6772	6.70245	6.30914	5.91955	5.57569	6.5076	6.28107	6.14208	5.85879	6.30833	6.59324	6.79412	5.99758	5.00215	6.02578	5.30981	6.591	6.08279	6.39417
	-0.217908	4.95304	4.34661	6.32717	3.38476	5.68526	4.40845	5.9061	4.61295				-0.217908	6.3542	7.64147	7.66391	6.75863	6.35087	6.18635	6.6945	7.04338	6.99002	4.82151	6.57478	6.00922	6.77976	6.85426	6.33454	5.95253	5.75226	6.52464	6.30926	6.19521	5.99755	6.39465	6.67773	6.81179	5.99152	4.95396	5.98013	5.29914	6.62629	6.05281	6.40321
	-0.207668	4.9578	4.44975	6.3319	3.07026	5.7505	4.51157	6.07913	4.51153				-0.207668	6.41259	7.54837	7.68642	6.71583	6.37159	6.24386	6.77168	7.04092	7.07626	4.79867	6.60399	6.16666	6.85382	6.96067	6.50373	6.06926	5.86515	6.61367	6.30351	6.2167	6.15329	6.51299	6.7187	6.89739	5.96038	5.03009	6.04227	5.46969	6.72866	5.98628	6.46705
	-0.197428	4.97722	4.51832	6.37473	2.92654	5.84632	4.57786	6.10477	4.49197				-0.197428	6.46313	7.49138	7.66956	6.85236	6.28436	6.16671	6.75359	7.17053	7.10152	4.88801	6.61544	6.15339	7.00924	7.01483	6.57618	6.09317	5.89691	6.72352	6.40886	6.2907	6.30083	6.65559	6.8547	6.83934	6.00705	5.14221	6.13306	5.59111	6.73948	5.95703	6.51308
	-0.187188	5.04215	4.55482	6.46214	3.26503	5.82052	4.55201	6.14114	4.49936				-0.187188	6.51879	7.52752	7.73271	6.87083	6.39022	6.17657	6.77038	7.31728	7.02196	4.94327	6.6907	6.11993	7.15632	7.03699	6.67174	6.17797	5.91367	6.75548	6.43575	6.25496	6.7443	6.66818	6.99807	6.81174	6.04744	5.17957	6.13056	5.70271	6.7635	5.96629	6.58711
	-0.176948	5.12259	4.59836	6.41563	3.45393	6.01418	4.6465	6.23024	4.49931				-0.176948	6.56454	7.57305	7.89593	6.94377	6.46231	6.30206	6.84529	7.45889	7.08642	4.88634	6.84815	6.09482	7.16879	7.10494	6.73414	6.16985	6.00024	6.75465	6.37132	6.23172	6.79869	6.69526	7.06483	6.89301	6.07071	5.28088	6.02668	5.70291	6.77669	6.04012	6.65379
	-0.166708	5.20739	4.56831	6.3824	3.57657	6.15825	4.85305	6.33573	4.57745				-0.166708	6.57821	7.51549	7.89156	6.96375	6.4345	6.39771	6.85047	7.52251	7.1365	4.83703	6.88935	6.1503	7.21808	7.24488	6.78581	6.14177	6.03474	6.81703	6.28043	6.27333	6.6756	6.71153	7.00984	6.91658	6.05652	5.25661	5.9891	5.71727	6.80506	6.0615	6.76137
	-0.156468	5.2575	4.63241	6.34655	3.68044	6.12493	4.87473	6.48671	4.65675				-0.156468	6.61624	7.69167	7.78205	6.93304	6.50131	6.34739	6.92242	7.66872	7.24992	4.79237	6.95474	6.1575	7.27654	7.27051	6.83469	6.10247	6.03461	6.83292	6.36697	6.27479	6.63277	6.76743	7.16823	6.92009	6.14371	5.3661	5.97972	5.75279	6.79557	6.11697	6.84918
	-0.146228	5.2878	4.58589	6.48401	3.752	6.14081	4.77659	6.57472	4.70059				-0.146228	6.64986	7.80419	7.78906	6.94147	6.55785	6.27639	6.88556	7.72854	7.30229	4.76051	6.99754	6.30396	7.27341	7.36265	6.87432	6.08171	6.13065	6.78862	6.35057	6.32217	6.62626	6.73351	7.33335	6.96116	6.14499	5.40829	6.012	5.86238	6.88361	6.08079	6.9179
	-0.135988	5.35397	4.63717	6.54131	3.84893	6.1954	4.78743	6.72285	4.74474				-0.135988	6.68652	7.82447	7.9683	6.94886	6.67133	6.20678	6.93082	7.75359	7.32797	4.85475	6.99831	6.25971	7.2874	7.44878	6.89798	6.18108	6.12397	6.81446	6.37517	6.46176	6.651	6.67319	7.4099	7.00697	6.06863	5.48758	6.13688	5.95185	6.94195	6.08126	6.85096
	-0.125748	5.41236	4.63345	6.47834	3.97234	6.34758	4.81985	6.77641	4.85856				-0.125748	6.71302	7.83345	7.95042	7.02123	6.66814	6.26303	6.97523	7.77131	7.35419	5.01612	7.05554	6.26684	7.31424	7.52138	6.86146	6.26315	6.20377	6.93282	6.40662	6.52757	6.58457	6.59528	7.42923	7.02537	6.00152	5.53379	6.18935	5.9919	6.94465	6.08277	6.80556
	-0.115507	5.4228	4.74572	6.47221	3.9979	6.26744	4.84774	6.74502	4.88358				-0.115507	6.74508	7.95388	7.92221	7.04234	6.71043	6.29178	6.93169	7.79823	7.42303	4.98444	7.07675	6.35675	7.34603	7.4939	6.94434	6.32594	6.27632	7.04417	6.41862	6.45797	6.69482	6.62138	7.51994	7.13479	5.97385	5.55926	6.236	5.91223	7.00095	6.05379	6.84666
	-0.105267	5.44898	4.85737	6.45273	4.0106	6.28851	4.85281	6.72815	4.95267				-0.105267	6.78336	8.03718	8.00061	7.00212	6.77956	6.32637	6.95611	7.80811	7.53375	4.91168	7.15564	6.35426	7.4054	7.59702	7.05503	6.40242	6.30347	7.06567	6.51831	6.40561	6.69387	6.70942	7.57673	7.13565	5.99869	5.53791	6.2593	5.82201	7.0533	6.12172	6.97385
	-0.0950274	5.46364	4.85051	6.47743	4.06116	6.31562	4.89696	6.74519	4.8986				-0.0950274	6.8138	7.98802	8.144	6.96134	6.79562	6.27758	6.96963	7.80505	7.53069	4.91099	7.12423	6.46009	7.48652	7.72995	7.12201	6.49488	6.26493	7.00259	6.59164	6.4595	6.71717	6.81444	7.68535	7.11709	6.02506	5.45364	6.33502	5.87958	7.08622	6.21455	6.96674
	-0.0847874	5.46134	4.90788	6.50565	4.09394	6.29638	4.89336	6.76375	4.76845				-0.0847874	6.84611	7.93613	8.14061	7.0834	6.71544	6.32088	7.07531	7.91159	7.49055	4.83088	7.16519	6.47586	7.46997	7.87722	7.17778	6.5191	6.22779	6.96544	6.69092	6.58512	6.70298	6.78202	7.76199	7.11586	6.06533	5.54856	6.35646	5.96658	7.14637	6.28753	6.99055
	-0.0745474	5.49042	4.98864	6.5484	4.16171	6.32491	4.91237	6.7299	4.76701				-0.0745474	6.86553	7.89046	8.21074	7.12833	6.66278	6.48299	7.01064	7.8995	7.38533	4.77713	7.12175	6.56639	7.46925	7.94354	7.18192	6.60722	6.27614	6.98683	6.72233	6.68401	6.73829	6.73708	7.72076	6.99365	6.11355	5.70174	6.33983	5.99152	7.20405	6.35305	7.06517
	-0.0643074	5.50261	4.87648	6.6886	4.16562	6.24707	4.8999	6.77784	4.86273				-0.0643074	6.87414	7.86087	8.17892	7.12785	6.61346	6.50216	7.0067	7.90984	7.33621	4.85414	7.16032	6.49152	7.45886	7.91788	7.21368	6.60305	6.26249	7.05825	6.73141	6.57488	6.77836	6.6959	7.72855	7.0615	6.1604	5.74717	6.46739	6.04902	7.16065	6.3189	7.19389
	-0.0540673	5.50274	4.77927	6.61121	4.27399	6.28107	4.89361	6.82762	4.85243				-0.0540673	6.88535	7.88066	8.14285	7.06781	6.68833	6.50296	6.93755	7.90294	7.40234	4.93063	7.18602	6.44314	7.49427	7.97989	7.28279	6.57903	6.35357	7.07404	6.64738	6.49193	6.77224	6.65002	7.842	7.11156	6.12242	5.67614	6.51096	6.06259	7.14764	6.46838	7.20849
	-0.0438273	5.51913	4.77785	6.59025	4.28261	6.37193	4.84953	6.91925	4.84247				-0.0438273	6.88232	8.07591	8.20084	6.99066	6.70486	6.38694	6.98404	7.96819	7.43142	4.91625	7.24252	6.41832	7.52356	7.93496	7.26804	6.46894	6.41993	6.91304	6.58269	6.4793	6.78997	6.68821	7.80141	7.04198	6.08678	5.7572	6.43413	6.1159	7.13583	6.5336	7.17418
	-0.0335873	5.57767	4.9671	6.64513	4.39355	6.49924	4.84171	6.90572	4.79126				-0.0335873	6.911	8.17221	8.21766	7.11039	6.66817	6.41932	6.97694	8.00826	7.43675	4.90876	7.31927	6.43891	7.50542	7.95707	7.40126	6.44269	6.48166	6.96145	6.59314	6.50868	6.79556	6.76244	7.82153	7.15754	6.1651	5.80954	6.45498	6.05377	7.12268	6.53952	7.11917
	-0.0233473	5.61837	5.03445	6.65704	4.44711	6.40009	4.95546	6.96543	4.869				-0.0233473	6.91948	8.04523	8.26054	7.13318	6.56066	6.47155	7.01589	7.99063	7.46247	4.9293	7.32344	6.54064	7.47486	7.9048	7.31433	6.45138	6.46438	7.00122	6.60938	6.47607	6.86024	6.80272	7.92864	7.16786	6.192	5.75825	6.45816	6.08821	7.22167	6.52274	7.15382
	-0.0131072	5.65753	5.02678	6.69635	4.46284	6.43741	5.02012	7.03723	4.92196				-0.0131072	6.93368	8.03134	8.24201	7.08681	6.59015	6.57367	7.13511	8.02384	7.54557	5.01553	7.37308	6.59439	7.54536	7.89501	7.25589	6.49239	6.4218	6.99075	6.62675	6.51529	6.82025	6.79778	7.93347	7.17622	6.17523	5.6376	6.49513	6.10424	7.28633	6.40446	7.22495
	-0.00286721	5.74555	5.15992	6.72575	4.52368	6.56074	5.06989	7.19473	4.98418				-0.00286721	6.94414	8.00464	8.22305	7.11209	6.63329	6.67321	7.19751	8.03241	7.59667	5.00971	7.33081	6.53081	7.58003	7.99726	7.12119	6.52469	6.40562	6.92503	6.76734	6.60543	6.74862	6.8187	7.91398	7.17511	6.1796	5.62492	6.44052	6.18085	7.31318	6.41037	7.24739
	0.00737282	5.68012	5.12516	6.56453	4.52352	6.4887	4.97897	7.11338	4.96656				0.00737282	6.94205	7.97846	8.34844	7.1298	6.73797	6.67821	7.21354	8.09307	7.65208	4.93375	7.28765	6.50841	7.59719	7.9588	7.1037	6.53297	6.40578	7.00811	6.79114	6.65325	6.69497	6.85885	7.91642	7.12127	6.15738	5.56742	6.37865	6.14652	7.33422	6.31331	7.16014
	0.0176128	5.63351	5.13637	6.43147	4.52015	6.48011	4.94101	7.00901	4.91642				0.0176128	6.93525	8.00462	8.42369	7.12663	6.79147	6.61307	7.20918	8.078	7.62591	4.93449	7.23985	6.48672	7.54932	7.82158	7.13623	6.56128	6.46668	7.14241	6.71555	6.57224	6.68322	6.81894	7.89071	7.10299	6.1763	5.66157	6.29544	6.1339	7.3037	6.3352	7.15665
	0.0278529	5.60027	5.0323	6.37801	4.45595	6.45438	4.98337	6.99664	4.90122				0.0278529	6.93006	7.95694	8.42063	7.15142	6.6866	6.62379	7.19123	8.1156	7.58681	4.94764	7.17293	6.59766	7.46677	7.9192	7.11489	6.52455	6.52137	7.08101	6.67028	6.53507	6.72058	6.78333	7.84635	7.09386	6.25439	5.82323	6.38045	6.15849	7.27225	6.12791	7.1565
	0.0380929	5.62703	5.03201	6.36897	4.51117	6.51899	5.034	6.99667	4.92738				0.0380929	6.9005	7.84055	8.38251	7.09391	6.67657	6.63055	7.12643	8.02901	7.50384	4.98615	7.11356	6.58893	7.46716	7.89771	7.15357	6.52952	6.46261	6.9311	6.67692	6.54403	6.73095	6.69732	7.80247	7.06186	6.22142	5.82016	6.3764	6.1008	7.26706	6.06777	7.2342
	0.0483329	5.61019	4.98917	6.40646	4.51544	6.55088	4.90842	6.98618	4.9148				0.0483329	6.8975	7.81188	8.34467	7.11427	6.7132	6.60439	7.04531	8.13322	7.47021	4.89491	7.13755	6.63124	7.5028	7.88638	7.24053	6.45532	6.42507	6.99018	6.63691	6.55285	6.68435	6.7403	7.75988	6.99972	6.16777	5.84124	6.42193	6.19777	7.19261	6.1063	7.22211
	0.058573	5.57813	5.01576	6.38831	4.46077	6.46725	4.84528	6.9295	4.94004				0.058573	6.88398	7.81775	8.34937	7.19884	6.65223	6.51878	7.00497	8.09753	7.53331	4.92847	7.29687	6.47371	7.51016	7.8434	7.28619	6.47089	6.37803	7.02067	6.50943	6.55973	6.74693	6.76297	7.66384	7.02916	6.07401	5.77113	6.38907	6.15554	7.20931	6.16052	7.10656
	0.068813	5.56499	5.04713	6.33474	4.40781	6.4284	4.9155	6.91077	4.91059				0.068813	6.85105	7.85955	8.27434	7.15351	6.66653	6.4367	6.94609	8.00243	7.50248	4.98029	7.20277	6.43613	7.47794	7.8018	7.29168	6.49311	6.39884	6.9591	6.45593	6.50238	6.8588	6.72773	7.62883	6.99869	6.06551	5.69175	6.21805	6.12197	7.17176	6.14986	7.0569
	0.079053	5.56817	5.00014	6.35246	4.38872	6.38534	4.86996	7.03264	4.94795				0.079053	6.81175	7.81044	8.21054	7.03162	6.60535	6.3159	6.98583	7.94157	7.49056	5.06251	7.13128	6.35446	7.43919	7.75262	7.29641	6.39187	6.32311	6.96313	6.42567	6.44424	6.83723	6.67601	7.65434	7.01529	6.06628	5.61715	6.06989	6.12945	7.13539	6.11447	7.06057
	0.089293	5.59093	5.0071	6.34573	4.50831	6.34977	4.86025	7.13651	4.92881				0.089293	6.78311	7.83358	8.14761	6.98642	6.62553	6.2842	7.06821	7.91678	7.51184	5.01006	7.15278	6.29204	7.38973	7.68497	7.2392	6.31635	6.20174	6.97207	6.42266	6.4177	6.76543	6.67638	7.63604	7.12969	6.1177	5.5023	5.92843	6.05744	7.1853	6.07005	6.951
	0.0995331	5.54803	4.99081	6.32338	4.49982	6.33271	4.76708	7.03759	4.88482				0.0995331	6.76077	7.82015	8.18753	7.04698	6.58079	6.33485	7.05061	7.91571	7.47321	4.91154	7.1323	6.36109	7.32127	7.65237	7.11024	6.28741	6.16694	7.09122	6.38641	6.41234	6.67453	6.75097	7.57146	7.12244	6.03479	5.40562	5.90858	5.97472	7.11758	6.05583	6.96376
	0.109773	5.50085	4.93285	6.30298	4.5224	6.21878	4.7487	6.93663	4.84361				0.109773	6.71377	7.83482	8.09689	6.99944	6.53455	6.27867	6.91746	7.81678	7.40198	4.89945	7.07906	6.33477	7.23405	7.56147	7.13916	6.3399	6.11405	7.0427	6.37204	6.34833	6.70608	6.73979	7.48788	7.13383	5.9572	5.42329	5.84473	5.94946	6.98643	5.94687	6.89211
	0.120013	5.43165	4.91648	6.12904	4.49524	6.03827	4.73299	6.94242	4.76708				0.120013	6.68413	7.84446	7.98671	6.96468	6.5716	6.36638	6.85171	7.77039	7.30965	4.82033	7.04146	6.31033	7.27345	7.45531	7.07999	6.33905	6.09155	6.94828	6.41877	6.30518	6.70325	6.70191	7.51949	7.168	5.94025	5.39215	5.84663	5.96624	6.96095	5.75709	6.81872
	0.130253	5.40668	4.92831	6.12333	4.47045	6.02988	4.60604	6.95166	4.73711				0.130253	6.68109	7.87258	7.9946	7.00247	6.56211	6.28746	6.82421	7.72519	7.30061	4.80315	7.06015	6.30994	7.39185	7.40635	7.0359	6.33943	6.06129	6.98678	6.35254	6.3618	6.70667	6.6638	7.53895	7.18544	6.06173	5.3261	5.84508	5.96727	6.97694	5.63699	6.84544
	0.140493	5.38092	4.96736	6.04396	4.37128	6.00488	4.59652	6.93208	4.75035				0.140493	6.64436	7.87419	7.94601	6.99572	6.4509	6.28067	6.76921	7.63005	7.17225	4.77842	7.04521	6.2631	7.29071	7.34245	7.01154	6.27404	6.02902	7.03684	6.29468	6.37258	6.6457	6.62732	7.49627	7.19044	6.14624	5.29891	5.82642	5.95652	6.91011	5.59074	6.78447
	0.150733	5.34459	4.89214	5.91263	4.34815	6.00504	4.64887	6.82246	4.78281				0.150733	6.58985	7.71302	7.95396	6.92025	6.32422	6.23486	6.72164	7.58566	7.07099	4.68429	7.10834	6.25384	7.19112	7.23855	7.01614	6.13603	5.9705	7.02213	6.20352	6.36556	6.63649	6.61815	7.49153	7.02824	5.98908	5.33438	5.80699	5.97216	6.80239	5.63179	6.66973
	0.160973	5.3111	4.78329	5.82898	4.35482	5.96551	4.65858	6.87361	4.71294				0.160973	6.5509	7.78685	8.05174	6.9916	6.33197	6.20208	6.80323	7.58609	7.02923	4.58014	6.96237	6.26818	7.15564	7.17171	6.92165	6.05853	5.89969	6.86969	6.14543	6.30591	6.59042	6.51356	7.42713	6.99597	5.93215	5.47412	5.72307	5.9105	6.79521	5.51352	6.52957
	0.171213	5.29024	4.81376	5.87029	4.39093	5.86074	4.63968	6.82458	4.63171				0.171213	6.52599	7.70547	8.1046	6.99799	6.38265	6.20469	6.78875	7.62431	7.10764	4.5182	6.82676	6.1583	7.19543	7.15899	6.87692	5.98477	5.88208	6.80336	6.12367	6.22786	6.61348	6.47594	7.37831	6.96323	6.03699	5.44207	5.60595	5.87968	6.8035	5.41105	6.49696
	0.181453	5.24552	4.81612	5.87891	4.37513	5.80725	4.57826	6.73196	4.53098				0.181453	6.50647	7.7239	8.16937	6.91926	6.35637	6.1509	6.77875	7.58696	7.1159	4.53924	6.83487	6.03895	7.21752	7.16407	6.86433	5.97282	5.90289	6.82194	6.16164	6.07527	6.54708	6.47454	7.33087	6.98561	5.97615	5.37457	5.57707	5.85447	6.84782	5.36278	6.46811
	0.191693	5.20272	4.7303	5.9097	4.32648	5.77374	4.48192	6.63686	4.56004				0.191693	6.46639	7.74091	8.18256	6.84043	6.26365	6.07188	6.71006	7.50575	7.05569	4.62681	6.88231	6.00896	7.1004	7.08375	6.90479	5.97532	5.85252	6.72669	6.259	5.95589	6.44158	6.44587	7.20849	6.90022	6.05288	5.31844	5.61607	5.86452	6.81363	5.25679	6.32591
	0.201933	5.15325	4.69754	5.88248	4.31928	5.73238	4.41427	6.55826	4.46852				0.201933	6.40849	7.71137	8.12032	6.79049	6.16613	5.99683	6.68889	7.42992	6.96594	4.75831	6.78342	5.99218	7.0068	6.97498	6.84953	5.94064	5.7382	6.61717	6.24213	6.00636	6.38371	6.32318	7.06329	6.8684	6.01697	5.2955	5.65474	5.82212	6.79937	5.13506	6.11283
	0.212173	5.08646	4.62467	5.80325	4.32476	5.70058	4.30505	6.42922	4.41771				0.212173	6.37315	7.66613	8.11811	6.83158	6.12257	5.95969	6.63684	7.39777	6.89993	4.72337	6.60281	6.09989	6.91572	6.88953	6.68306	5.90112	5.6849	6.61192	6.15624	6.11407	6.39346	6.30926	7.02507	6.91744	6.10741	5.22123	5.66265	5.70912	6.7741	5.01228	6.04721
	0.222413	5.05142	4.62212	5.64112	4.3556	5.65378	4.29646	6.38904	4.40182				0.222413	6.33396	7.61987	8.06445	6.79896	6.0893	5.899	6.47665	7.41954	6.87481	4.74202	6.63028	5.97982	6.822	6.84405	6.73016	5.78357	5.7226	6.53112	6.12814	6.13056	6.37532	6.28066	6.98956	6.89724	6.09157	5.1137	5.55975	5.72899	6.70312	4.9252	6.0668
	0.232653	5.06011	4.699	5.52159	4.40712	5.60663	4.33953	6.33918	4.50769				0.232653	6.29606	7.54298	8.13795	6.82308	6.01011	5.87892	6.39783	7.32437	6.84982	4.74182	6.61131	5.9128	6.7874	6.79091	6.63428	5.64308	5.7998	6.561	6.03739	6.07504	6.39901	6.31506	7.04381	6.80349	5.94408	5.05937	5.55888	5.71471	6.65544	4.83126	5.99683
	0.242893	5.05811	4.75101	5.59228	4.48525	5.58264	4.31236	6.23731	4.44593				0.242893	6.24969	7.38895	8.15129	6.86422	5.94695	5.79587	6.43326	7.17564	6.85719	4.64295	6.52262	5.97948	6.76766	6.72494	6.50142	5.6181	5.73735	6.609	6.00205	6.03476	6.31448	6.18845	7.00555	6.76739	5.86173	5.14972	5.63536	5.6959	6.70235	4.69806	5.71807
	0.253133	5.01185	4.69664	5.5363	4.43596	5.50542	4.30295	6.24165	4.36402				0.253133	6.20216	7.34725	8.1105	6.92981	5.87918	5.76424	6.45795	7.10939	6.76313	4.51398	6.49097	6.07111	6.67361	6.64601	6.4803	5.60903	5.74969	6.58962	5.88675	6.08645	6.12806	6.05613	7.01041	6.7652	5.76308	5.09325	5.47211	5.54779	6.7101	4.70382	5.65575
	0.263373	4.97147	4.6529	5.41076	4.39526	5.40215	4.29422	6.18023	4.46476				0.263373	6.15572	7.29277	8.18236	6.91844	5.83814	5.68018	6.37226	7.0734	6.73645	4.51049	6.50313	5.97801	6.66133	6.57936	6.47636	5.48329	5.71612	6.46954	5.88707	6.0734	6.11221	6.03028	6.90451	6.75289	5.74381	5.02171	5.32756	5.48491	6.66689	4.57338	5.62129
	0.273614	4.97104	4.63745	5.49319	4.45027	5.39202	4.28091	6.14666	4.39677				0.273614	6.09532	7.23018	8.11855	6.80458	5.76446	5.53679	6.26295	7.00168	6.64577	4.50976	6.51139	5.9528	6.58804	6.51755	6.46987	5.36779	5.61786	6.45967	5.80492	5.98074	5.97963	6.03461	6.76876	6.7249	5.77351	5.07078	5.20493	5.52027	6.61665	4.45601	5.56414
	0.283854	4.90121	4.50681	5.47826	4.391	5.36838	4.20551	6.07316	4.28533				0.283854	6.05615	7.20835	8.05466	6.72414	5.67034	5.50117	6.20461	7.05535	6.60828	4.43348	6.41084	5.99134	6.54022	6.5028	6.40775	5.36903	5.65514	6.43771	5.80183	5.90742	5.88723	6.01653	6.71937	6.73799	5.71926	5.04729	5.1561	5.54722	6.59234	4.31028	5.4664
	0.294094	4.83342	4.41536	5.42584	4.36904	5.28924	4.20461	5.93509	4.19479				0.294094	5.99885	7.07514	7.99312	6.70281	5.72816	5.42425	6.18859	6.96889	6.41031	4.43641	6.27478	5.92517	6.47969	6.44607	6.36235	5.36602	5.75945	6.28345	5.72956	5.87008	5.85649	5.93586	6.73163	6.6651	5.62582	5.03207	5.03608	5.61944	6.49819	4.20549	5.33493
	0.304334	4.7837	4.41853	5.29094	4.37453	5.03861	4.2175	5.91129	4.23451				0.304334	5.95574	7.02051	8.02213	6.79462	5.75737	5.43835	6.16694	6.91355	6.30449	4.40367	6.11654	5.84619	6.4354	6.4324	6.27969	5.19757	5.74597	6.192	5.63094	5.81584	5.85786	5.84314	6.7608	6.56837	5.68341	4.96901	4.94096	5.64149	6.4542	4.14595	5.29272
	0.314574	4.73302	4.43993	5.15892	4.20151	5.01694	4.1935	5.86335	4.25697				0.314574	5.9164	7.06714	8.0548	6.82565	5.76374	5.45156	6.09656	6.86565	6.23878	4.39872	6.07017	5.79015	6.26126	6.48714	6.21314	5.10263	5.56078	6.1903	5.56227	5.77017	5.79305	5.74556	6.66041	6.58195	5.73988	4.95244	4.92202	5.57582	6.39803	4.13761	5.2146
	0.324814	4.69565	4.39138	5.11079	4.19771	5.07904	4.10574	5.81471	4.17017				0.324814	5.86671	6.95922	8.01142	6.89593	5.70793	5.31585	5.91908	6.85612	6.12058	4.30208	5.92131	5.7605	6.16385	6.41441	6.1405	5.15017	5.50301	6.11514	5.49338	5.68772	5.78594	5.71708	6.54284	6.55408	5.6875	4.92319	5.0015	5.59583	6.4095	4.15914	5.18659
	0.335054	4.65152	4.2614	5.10121	4.18737	5.00588	4.10087	5.76841	4.13549				0.335054	5.81972	7.01966	7.94283	6.82791	5.66234	5.22464	5.78662	6.76836	6.04311	4.3208	5.91458	5.68791	6.12174	6.36916	6.06354	5.20876	5.47399	6.00163	5.42791	5.60926	5.77001	5.63872	6.5445	6.42202	5.72655	4.86328	5.10588	5.55794	6.30123	4.02438	5.16228
	0.345294	4.60413	4.18702	5.19628	4.26243	4.89368	4.04083	5.62835	4.02035				0.345294	5.75741	7.07819	7.87589	6.74729	5.55988	5.08292	5.72301	6.63162	5.9636	4.2543	5.92105	5.75953	6.07927	6.32093	6.02276	5.09852	5.39999	5.86682	5.39241	5.49902	5.70019	5.5776	6.42133	6.36868	5.6524	4.7196	5.18409	5.549	6.26589	3.91079	5.09568
	0.355534	4.53842	4.1552	5.0793	4.30615	4.73304	3.96549	5.47493	4.05483				0.355534	5.71606	7.05889	7.77677	6.61211	5.42756	5.18253	5.80425	6.52901	6.04327	4.26009	5.79472	5.72757	6.00012	6.16484	6.0192	4.93067	5.37915	5.90962	5.35189	5.43407	5.72459	5.44601	6.40509	6.38886	5.53299	4.69724	5.13229	5.56234	6.21395	3.96062	5.01158
	0.365774	4.50713	4.22458	4.93272	4.37288	4.66613	3.96708	5.39026	3.99628				0.365774	5.67073	7.00925	7.76601	6.48994	5.41616	5.20959	5.75897	6.55716	6.01194	4.13594	5.63251	5.78243	5.85968	6.00566	6.05199	4.90895	5.31416	5.78896	5.35915	5.40678	5.69522	5.3812	6.2945	6.30064	5.44631	4.72028	5.25403	5.59603	6.22153	3.84067	4.90616
	0.376014	4.47887	4.21	4.86018	4.31178	4.67606	3.85789	5.40812	4.02805				0.376014	5.60356	6.89709	7.59246	6.46233	5.46126	5.13534	5.613	6.47344	6.05597	4.07879	5.5225	5.72673	5.69697	6.03104	5.95064	4.75883	5.26533	5.76068	5.32546	5.42458	5.5867	5.34625	6.11649	6.201	5.45146	4.69919	5.22967	5.4818	6.21757	3.67199	4.87213
	0.386254	4.4187	4.05392	4.66064	4.28769	4.65826	3.86982	5.36178	4.03881				0.386254	5.53238	6.82051	7.54909	6.40998	5.47535	5.00834	5.50836	6.3708	6.04534	4.17744	5.42706	5.63215	5.6485	5.9882	5.85286	4.68522	5.23884	5.69163	5.16396	5.35162	5.50708	5.17548	5.96249	6.02113	5.38589	4.66094	5.23455	5.42822	6.16587	3.57726	4.80728
	0.396494	4.33388	3.95748	4.53675	4.18497	4.57787	3.82223	5.31326	3.94463				0.396494	5.48825	6.74913	7.45272	6.47066	5.45061	4.96691	5.47695	6.32096	5.99289	4.17478	5.37225	5.63942	5.60323	5.97814	5.8137	4.78883	5.19748	5.60423	5.09277	5.34173	5.41118	5.02583	5.94039	5.92792	5.38585	4.63388	5.22308	5.46014	6.06461	3.44311	4.64396
	0.406734	4.2551	3.9558	4.47807	4.09786	4.47726	3.69396	5.2516	3.83115				0.406734	5.4493	6.72668	7.44307	6.44297	5.32044	4.88102	5.31683	6.26822	5.89754	4.2467	5.36821	5.64248	5.6812	5.89609	5.72803	4.79876	5.10593	5.46478	5.07693	5.24733	5.35285	5.03543	5.89548	5.92997	5.4299	4.66484	5.16695	5.50444	6.04627	3.32291	4.57686
	0.416974	4.2033	3.91043	4.44492	4.07881	4.375	3.61803	5.15221	3.84373				0.416974	5.41936	6.73101	7.4382	6.38339	5.42421	4.93445	5.31745	6.18939	5.81129	4.12883	5.30804	5.67188	5.54738	5.91929	5.52966	4.83562	5.07321	5.48363	5.04068	5.18658	5.33023	5.07048	5.91292	5.8947	5.35341	4.67206	5.19017	5.45294	6.00151	3.1753	4.57284
	0.427214	4.12767	3.81343	4.36756	4.11568	4.24812	3.52712	5.05505	3.76675				0.427214	5.37004	6.61953	7.41559	6.49222	5.44116	4.85989	5.30345	6.1617	5.78051	4.06585	5.30386	5.57866	5.39503	5.85479	5.40913	4.74944	5.05409	5.51057	4.99481	5.17674	5.18307	4.91113	5.79277	5.83464	5.38183	4.57423	5.13211	5.44904	5.96244	3.11972	4.59333
	0.437454	4.02614	3.64118	4.2732	3.96708	4.10336	3.55823	4.96287	3.67709				0.437454	5.32177	6.60779	7.39713	6.50973	5.43066	4.73832	5.22941	6.0355	5.71952	4.03339	5.26994	5.51394	5.29829	5.8769	5.304	4.66311	5.04156	5.35572	5.0271	5.19142	5.1476	4.8276	5.58456	5.82398	5.24466	4.61087	5.16497	5.42609	5.83185	3.18053	4.56696
	0.447694	3.94327	3.56998	4.16179	3.89342	4.06055	3.46001	4.85857	3.59859				0.447694	5.26046	6.52987	7.32226	6.4571	5.43022	4.56819	5.15718	5.96376	5.62072	3.8836	5.15576	5.58477	5.24069	5.82541	5.30555	4.60938	5.06441	5.26954	4.97861	5.24822	5.02665	4.79296	5.38603	5.7679	5.09763	4.61119	5.21416	5.33672	5.74136	3.16362	4.46019
	0.457934	3.90697	3.52061	4.05018	3.88443	4.06181	3.42088	4.85396	3.55695				0.457934	5.21325	6.46128	7.1909	6.51111	5.35364	4.49259	5.14434	5.91126	5.56193	3.88228	5.09187	5.6287	5.23234	5.75682	5.26211	4.57653	5.09204	5.20876	4.90244	5.10379	4.89565	4.75149	5.44566	5.80796	4.94885	4.58965	5.18752	5.26382	5.66748	3.05006	4.42467
	0.468174	3.84288	3.36319	3.96404	3.75719	4.03879	3.40865	4.82124	3.54709				0.468174	5.15926	6.42715	7.08676	6.49938	5.26113	4.50004	5.05514	5.87252	5.52238	3.91082	4.91868	5.53515	5.18292	5.73114	5.29792	4.46449	5.03412	5.12766	4.82971	5.10195	4.75688	4.80493	5.43687	5.71326	4.90933	4.4664	5.20757	5.25527	5.63528	2.86092	4.3719
	0.478414	3.81142	3.30861	3.89174	3.776	3.91161	3.40667	4.79176	3.59354				0.478414	5.0972	6.4063	7.11631	6.50675	5.17479	4.54843	4.94293	5.86291	5.42627	3.87554	4.94462	5.53081	5.03775	5.74454	5.20893	4.35403	4.98404	5.00263	4.72606	5.14061	4.63558	4.74872	5.35576	5.4785	4.86811	4.26881	5.10107	5.24055	5.57978	2.69612	4.40884
	0.488654	3.76664	3.22726	3.86371	3.75884	3.8896	3.46454	4.63907	3.52346				0.488654	5.03655	6.21193	7.06433	6.46984	5.04079	4.64607	4.82992	5.69058	5.35512	3.83861	4.93545	5.43657	4.98362	5.89174	5.07617	4.30405	4.93227	4.89702	4.64297	5.12529	4.57607	4.6545	5.30513	5.32088	4.74813	4.32558	4.96255	5.32861	5.52239	2.72876	4.25144
	0.498894	3.68719	3.13144	3.81761	3.82275	3.79279	3.35574	4.54113	3.34889				0.498894	5.00407	6.14986	7.01427	6.42982	5.08147	4.61371	4.69446	5.67449	5.2631	3.85039	4.86913	5.44754	4.99391	5.84227	4.98488	4.26365	4.89577	4.88173	4.65959	5.04226	4.58675	4.64351	5.32919	5.27881	4.69928	4.38313	4.93027	5.30933	5.43191	2.68284	4.19468
	0.509134	3.61707	3.09178	3.72224	3.77859	3.73288	3.28314	4.46134	3.24953				0.509134	4.96604	6.23209	7.05794	6.3706	5.04047	4.57717	4.63808	5.60573	5.18023	3.8726	4.78425	5.47192	4.99549	5.84068	4.96563	4.15983	4.87357	4.8386	4.56891	4.97806	4.47855	4.4818	5.22613	5.1813	4.68396	4.41516	4.99892	5.20586	5.47651	2.64972	4.13135
	0.519374	3.57539	3.09852	3.65774	3.7783	3.59835	3.17504	4.44133	3.27843				0.519374	4.91217	6.29906	6.9877	6.34868	4.97887	4.5564	4.52663	5.49832	5.09852	3.89824	4.79855	5.27643	4.98783	5.78428	4.86504	4.14426	4.86845	4.74602	4.51847	4.93216	4.40156	4.28035	5.13465	5.0355	4.69	4.29652	4.99303	5.1811	5.45288	2.6507	4.13486
	0.529614	3.51718	2.99181	3.56087	3.66778	3.50625	3.24206	4.39112	3.26039				0.529614	4.86723	6.34638	6.93697	6.28656	5.0142	4.46021	4.57211	5.4244	4.9518	4.00331	4.84626	5.27893	4.7559	5.66837	4.76933	4.10061	4.85196	4.75851	4.51586	4.84807	4.34674	4.17889	4.96205	4.99912	4.65817	4.29615	4.96548	5.14305	5.32595	2.70068	4.05073
	0.539854	3.41683	2.93339	3.49792	3.50575	3.49068	3.15743	4.16722	3.16541				0.539854	4.82309	6.34855	6.75589	6.31519	5.00114	4.36496	4.56258	5.26117	4.81364	4.1106	4.78023	5.37411	4.68018	5.70987	4.67516	4.1274	4.81803	4.78369	4.5395	4.73823	4.37578	4.17971	4.86959	4.89856	4.67596	4.15351	4.93425	4.99781	5.17056	2.67102	4.00585
	0.550094	3.34539	2.89028	3.47212	3.41833	3.39484	3.12019	4.1122	3.00977				0.550094	4.77738	6.28872	6.54844	6.27297	4.92649	4.27892	4.59281	5.16726	4.88128	4.18233	4.56551	5.32802	4.63811	5.72396	4.58288	4.19693	4.85341	4.60332	4.50309	4.77106	4.33309	4.12208	4.82908	4.91837	4.59939	4.01467	4.89617	4.98944	5.09698	2.59642	4.02034
	0.560334	3.27177	2.79882	3.3649	3.37477	3.26437	3.02615	4.0153	3.05805				0.560334	4.73794	6.2789	6.40251	6.25522	4.91809	4.29744	4.47925	5.04421	4.93712	4.10547	4.53695	5.27531	4.48872	5.77267	4.58516	4.26863	4.86952	4.47454	4.4275	4.75443	4.32365	3.96832	4.79064	4.80089	4.57652	3.97029	4.96384	4.92148	5.08031	2.54911	4.02156
	0.570574	3.21455	2.69508	3.27046	3.37477	3.21951	2.93353	3.9613	3.0472				0.570574	4.6798	6.16985	6.3253	6.21973	4.99704	4.32802	4.38964	4.99907	4.75048	4.01926	4.54274	5.27237	4.34285	5.79486	4.48372	4.14259	4.84557	4.33986	4.35519	4.66771	4.2505	3.95499	4.75851	4.71263	4.54543	3.96385	4.95164	4.78832	5.05265	2.48884	3.94084
	0.580814	3.16456	2.55485	3.24263	3.37724	3.16427	2.88785	3.94464	2.98045				0.580814	4.61568	6.21251	6.20464	6.09123	4.87061	4.26918	4.35506	4.92904	4.56197	3.94566	4.42733	5.27134	4.27402	5.76907	4.40848	4.07964	4.78297	4.3656	4.27293	4.58042	4.14259	3.9534	4.77377	4.62568	4.45654	3.96192	4.8554	4.74973	5.03139	2.41171	3.83656
	0.591054	3.10046	2.4439	3.23774	3.48005	3.0474	2.7492	3.84583	2.89908				0.591054	4.55949	6.22605	6.18483	6.04092	4.78094	4.30159	4.33364	4.77	4.4959	3.94889	4.35544	5.29614	4.20758	5.71001	4.38634	4.06676	4.73322	4.32516	4.16409	4.41645	4.05363	3.8556	4.67361	4.55151	4.3698	3.94588	4.8519	4.76297	4.95922	2.23349	3.78321
	0.601294	3.07388	2.4992	3.17978	3.57739	3.01517	2.67758	3.78818	2.77988				0.601294	4.50861	6.23415	6.14615	6.03352	4.66709	4.36221	4.23379	4.59285	4.36583	4.05894	4.34379	5.27737	4.0631	5.64629	4.33848	4.0665	4.67634	4.25657	4.14786	4.32281	3.99937	3.80299	4.45845	4.4724	4.24604	3.97149	4.93243	4.79054	4.84552	2.14452	3.76105
	0.611534	2.99893	2.46322	3.10149	3.48471	2.91736	2.61521	3.7312	2.67933				0.611534	4.46146	6.22275	6.05812	6.08791	4.71055	4.34027	4.23096	4.51288	4.33979	4.15101	4.31123	5.22976	3.95731	5.7197	4.23317	3.98864	4.58833	4.24107	4.08107	4.16972	3.94894	3.69708	4.32838	4.35273	4.20004	3.99164	4.83143	4.74181	4.71619	2.14742	3.71382
	0.621774	2.92993	2.31653	3.04306	3.4828	2.82736	2.59769	3.58948	2.65255				0.621774	4.42782	6.17419	5.9326	6.08513	4.78997	4.30903	4.2407	4.54387	4.34897	4.18237	4.25891	5.24246	3.96323	5.72466	4.13887	3.92558	4.61492	4.14368	4.04197	4.17873	3.8541	3.55667	4.31089	4.17337	4.17682	4.05975	4.74107	4.64606	4.69634	2.16457	3.61521
	0.632014	2.85564	2.29239	3.07991	3.35398	2.74076	2.52548	3.51371	2.48325				0.632014	4.37699	6.02574	5.82739	6.06406	4.75049	4.28934	4.11768	4.47131	4.3387	4.06601	4.35112	5.22203	3.84306	5.6881	4.09488	3.87994	4.64391	4.04102	3.94114	4.08504	3.76676	3.47704	4.22511	4.11777	4.29498	4.076	4.59454	4.57988	4.54304	2.22639	3.66729
	0.642254	2.79928	2.33614	3.04714	3.18517	2.67608	2.41182	3.43372	2.50489				0.642254	4.33646	5.94322	5.79624	6.02	4.76091	4.20152	4.07497	4.44241	4.28483	4.00506	4.33324	5.29092	3.75381	5.72986	4.05034	3.83198	4.61077	4.0257	3.92213	3.94563	3.66387	3.40787	4.13594	4.07943	4.25316	4.07567	4.49145	4.57023	4.46554	2.21522	3.71196
	0.652494	2.73458	2.35419	2.99775	3.04903	2.48379	2.34577	3.4691	2.4424				0.652494	4.33	5.9105	5.81983	5.99308	4.79067	4.27554	4.12983	4.46972	4.13869	4.06509	4.32901	5.33231	3.77641	5.76426	3.98115	3.78897	4.58971	4.05683	4.00262	3.97218	3.53998	3.40191	4.16751	3.94925	4.1368	4.09572	4.60894	4.57095	4.37755	2.21247	3.65256
	0.662735	2.74454	2.2952	3.02361	3.00957	2.47727	2.48096	3.52009	2.40509				0.662735	4.28896	5.90714	5.67675	6.03016	4.8313	4.24919	4.08596	4.39366	4.1304	4.0554	4.31137	5.33688	3.76248	5.71149	3.91785	3.74791	4.62578	4.03559	3.92482	3.93798	3.5658	3.29284	4.09209	3.92947	4.01706	4.0629	4.6657	4.48715	4.18628	2.11801	3.57944
	0.672975	2.66679	2.18696	2.92998	3.02398	2.34723	2.38287	3.40984	2.38666				0.672975	4.22044	5.93347	5.64899	5.90824	4.77568	4.09658	4.05198	4.31425	4.02872	4.08252	4.25416	5.15413	3.64544	5.54204	3.71975	3.72126	4.64827	3.84319	3.86235	3.93494	3.53906	3.23571	4.09372	3.7877	4.05122	4.0018	4.61731	4.43228	4.16634	2.09714	3.42493
	0.683215	2.58203	2.13156	2.84007	3.00625	2.30541	2.23201	3.24572	2.31319				0.683215	4.15433	5.93478	5.48639	5.73835	4.70325	4.08857	4.09278	4.16478	4.02094	3.98732	4.2565	5.13006	3.56113	5.54425	3.55914	3.63432	4.55145	3.75646	3.81064	3.82873	3.39192	3.11924	4.14475	3.7678	3.95807	4.00786	4.50004	4.30215	4.07588	2.10262	3.40973
	0.693455	2.50427	2.05746	2.81221	2.91016	2.28867	2.12846	3.18308	2.14983				0.693455	4.13198	5.86346	5.32336	5.61096	4.6832	4.25078	4.15653	4.09309	4.05089	3.9154	4.22342	5.14621	3.56889	5.57445	3.52797	3.68903	4.53955	3.73648	3.82251	3.82218	3.26816	3.07309	4.21119	3.54974	3.9277	3.99982	4.4301	4.29094	4.01462	2.14845	3.44717
	0.703695	2.44703	1.92972	2.70219	2.80697	2.2051	2.11058	3.20947	2.16519				0.703695	4.08919	5.8606	5.24063	5.50249	4.59336	4.25183	4.11328	4.06638	4.06456	3.83715	4.23634	5.11627	3.53652	5.48793	3.41209	3.70259	4.543	3.66401	3.84986	3.91647	3.24566	2.94482	4.16309	3.51555	3.69171	3.94379	4.42694	4.34199	3.96361	2.06523	3.37795
	0.713935	2.40552	1.83834	2.60976	2.81162	2.15029	2.10034	3.16083	2.16749				0.713935	4.04672	5.81674	5.07637	5.53531	4.55045	4.11362	4.16858	4.02778	3.99918	3.96334	4.19628	5.18546	3.44612	5.4533	3.33509	3.67981	4.53815	3.67731	3.83945	3.90726	3.18208	2.8675	4.06389	3.44869	3.60188	3.79247	4.33057	4.23673	3.86293	2.09155	3.4137
	0.724175	2.35687	1.83539	2.6412	2.7013	2.07516	2.15507	3.0759	2.01408				0.724175	4.01656	5.89126	4.93636	5.5012	4.5667	4.12017	4.22336	4.00753	4.068	3.99989	4.21788	5.15684	3.26235	5.34053	3.23491	3.6498	4.57194	3.58696	3.8725	3.81124	3.15532	2.81335	3.977	3.35369	3.57336	3.76064	4.30965	4.27124	3.65395	2.19945	3.40987
	0.734415	2.27424	1.75496	2.63899	2.54516	2.03441	2.10432	2.89537	1.94645				0.734415	3.99457	5.95451	4.87851	5.53313	4.5485	4.13136	4.26683	3.91735	4.01578	4.01397	4.25454	5.12928	3.21688	5.3942	3.13472	3.58867	4.51349	3.53998	3.80775	3.77085	3.05663	2.74287	3.92587	3.24882	3.6296	3.76746	4.33706	4.29758	3.59811	2.2166	3.40627
	0.744655	2.19195	1.72166	2.60822	2.39183	1.86596	2.03891	2.8349	1.88217				0.744655	3.96628	5.98746	4.90727	5.5333	4.55402	4.15535	4.27308	3.74936	3.94103	4.09092	4.20219	5.13872	3.25024	5.37476	3.02288	3.59592	4.39638	3.54558	3.71732	3.77578	3.01263	2.83634	3.85997	3.10174	3.64816	3.76197	4.23555	4.26535	3.55431	2.12849	3.37231
	0.754895	2.1298	1.75033	2.58717	2.39119	1.77524	1.92658	2.67329	1.80482				0.754895	3.92222	5.95065	4.87499	5.43559	4.58656	4.16087	4.30668	3.60431	4.00907	4.09838	4.19255	5.17827	3.2121	5.22128	2.91366	3.54552	4.3695	3.45968	3.7155	3.8062	2.95192	2.74788	3.7724	3.012	3.63174	3.6344	3.98059	4.31438	3.4197	2.17241	3.38792
	0.765135	2.0993	1.69911	2.60493	2.50523	1.70181	1.81868	2.58437	1.78098				0.765135	3.89262	5.92987	4.81382	5.3985	4.62818	4.13991	4.29978	3.56723	4.06029	4.14494	4.12461	5.16193	3.11612	5.1688	2.88452	3.42928	4.45338	3.3055	3.72946	3.73285	2.86266	2.63818	3.74638	2.93316	3.66214	3.57176	3.89905	4.31514	3.44225	2.20871	3.41009
	0.775375	2.06582	1.6699	2.64404	2.39393	1.62242	1.8456	2.48959	1.79525				0.775375	3.87283	5.96423	4.7363	5.46923	4.62912	4.07325	4.28827	3.52882	4.00094	4.08788	4.085	5.16339	3.18931	5.16709	2.74753	3.4637	4.53492	3.21307	3.76591	3.64183	2.80211	2.61046	3.66718	2.88383	3.68663	3.60961	3.89131	4.21486	3.33968	2.28227	3.4472
	0.785615	2.03944	1.70131	2.60363	2.41149	1.56886	1.86732	2.37198	1.75146				0.785615	3.84089	5.90602	4.60865	5.44209	4.55997	4.14728	4.27569	3.47742	4.06805	4.02623	4.02626	5.09436	3.16903	5.11769	2.63645	3.49136	4.52547	3.12953	3.76138	3.67944	2.78463	2.5504	3.74384	2.80852	3.64673	3.57608	3.85834	4.19441	3.11767	2.28044	3.52325
	0.795855	1.98577	1.6573	2.40514	2.36072	1.63619	1.82702	2.35548	1.65853				0.795855	3.80096	5.80245	4.49085	5.41119	4.47452	4.18069	4.29213	3.46607	4.16603	3.96639	4.10556	5.01999	2.99697	5.08968	2.60459	3.43546	4.46556	3.20202	3.79207	3.71071	2.69424	2.53028	3.6165	2.71296	3.54686	3.53138	3.84905	4.26204	2.92355	2.26009	3.42881
	0.806095	1.92367	1.60942	2.19924	2.30033	1.66432	1.81976	2.26756	1.60503				0.806095	3.75712	5.7788	4.40521	5.25369	4.41136	3.9978	4.39002	3.4229	4.1902	4.01199	4.23152	4.97007	2.95347	5.02767	2.63293	3.29301	4.43596	3.19201	3.80586	3.61627	2.5471	2.406	3.51294	2.61951	3.42094	3.55651	3.72252	4.28075	2.89156	2.3363	3.39869
	0.816335	1.86264	1.60028	2.17462	2.1817	1.50128	1.80314	2.16616	1.61131				0.816335	3.72239	5.79979	4.3825	5.20335	4.3926	4.00573	4.35033	3.33083	4.10062	4.05451	4.26566	5.00529	2.90464	5.01128	2.65262	3.30857	4.48214	3.16751	3.64333	3.60048	2.52773	2.28831	3.46029	2.60772	3.33458	3.55107	3.59442	4.22265	2.90277	2.22663	3.29363
	0.826575	1.82707	1.52655	2.22652	2.06783	1.40323	1.91813	2.09057	1.55663				0.826575	3.68895	5.77435	4.34798	5.25274	4.44347	4.09251	4.31964	3.16233	4.01105	3.9973	4.27624	5.04348	2.83245	5.00151	2.57277	3.23945	4.44857	3.19769	3.55115	3.5871	2.49333	2.31354	3.40094	2.47985	3.33807	3.5457	3.49929	4.11484	2.87754	2.17668	3.27706
	0.836815	1.78711	1.51498	2.23728	2.04272	1.30128	1.91478	2.04806	1.45065				0.836815	3.64663	5.68368	4.33356	5.2433	4.50406	4.07785	4.37572	3.0624	4.06871	4.02444	4.25905	5.0872	2.59678	4.95897	2.54373	3.08372	4.35533	3.11248	3.60312	3.53638	2.33502	2.36091	3.22274	2.42122	3.25951	3.50305	3.44858	4.03918	2.77707	2.19449	3.32653
	0.847055	1.73737	1.4824	2.23593	1.98104	1.26276	1.87204	1.96896	1.35847				0.847055	3.62528	5.63449	4.35397	5.14433	4.5132	4.07533	4.44427	3.12871	4.07331	4.00191	4.24534	5.0074	2.57367	4.90541	2.41493	3.08681	4.26847	3.08122	3.66458	3.54227	2.29921	2.26824	3.13379	2.33673	3.24404	3.54303	3.51593	4.07674	2.71177	2.14128	3.32789
	0.857295	1.71522	1.48866	2.28355	1.88562	1.26865	1.81019	1.94445	1.32541				0.857295	3.62097	5.66232	4.33052	5.13452	4.5464	4.06608	4.52413	3.0859	4.08187	3.99104	4.19471	5.09864	2.60317	4.84706	2.28465	3.10964	4.23597	3.09333	3.6053	3.51329	2.39568	2.21884	3.12961	2.2382	3.17768	3.59616	3.55179	4.13166	2.68506	2.14498	3.35092
	0.867535	1.65053	1.49429	2.22424	1.71539	1.2541	1.75581	1.86532	1.24459				0.867535	3.6042	5.68434	4.26685	5.21118	4.48993	4.01551	4.54812	3.04981	4.18124	3.97717	4.22926	5.13605	2.49041	4.78057	2.23225	3.19177	4.26709	3.15708	3.52188	3.43088	2.37709	2.14265	3.14042	2.18497	3.11412	3.6111	3.49788	4.02375	2.54426	2.17041	3.45783
	0.877775	1.61442	1.47178	2.21134	1.64091	1.26392	1.7401	1.79712	1.17577				0.877775	3.5948	5.6504	4.16661	5.21584	4.49447	4.06139	4.56958	3.0564	4.25428	4.00916	4.22248	5.25109	2.50937	4.75978	2.08882	3.19778	4.27335	3.20598	3.62296	3.37647	2.40521	2.09967	3.07111	2.11922	3.10744	3.61743	3.4505	3.95879	2.41695	2.23476	3.37665
	0.888015	1.5374	1.33022	2.13237	1.58949	1.26011	1.65163	1.64016	1.15786				0.888015	3.55328	5.57549	3.68705	5.13728	4.5683	4.01537	4.69832	3.00569	4.29379	3.96514	4.32759	5.28321	2.49681	4.61464	2.0754	3.12782	4.21514	3.19659	3.66816	3.46148	2.44582	2.01549	2.99198	1.95653	3.28159	3.41564	3.30612	3.88446	2.35571	2.25089	3.28079
	0.898255	1.5169	1.29288	2.1036	1.64602	1.28648	1.59166	1.59619	1.10144				0.898255	3.53147	5.55439	3.37395	5.12127	4.58001	3.92176	4.83727	2.9766	4.3748	3.93111	4.35389	5.35928	2.38074	4.50358	2.13963	3.08735	4.2451	3.06265	3.63272	3.50233	2.5287	1.94051	2.96545	1.90558	3.35273	3.30369	3.20994	3.8833	2.38539	2.1568	3.37352
	0.908495	1.4773	1.16145	2.03905	1.53112	1.32397	1.60844	1.55466	1.12241				0.908495	3.50879	5.52988	3.55794	5.25309	4.41378	3.78785	4.84358	2.93003	4.36793	3.91978	4.25836	5.30742	2.35033	4.49761	2.15032	3.1718	4.18845	3.0354	3.48667	3.58405	2.51461	1.88567	3.04477	1.91587	3.28232	3.24995	3.10068	3.85896	2.31911	2.08348	3.37399
	0.918735	1.45419	1.15173	1.98576	1.48859	1.39784	1.62063	1.45858	1.07623				0.918735	3.48359	5.46295	3.61892	5.22812	4.42876	3.8005	4.83215	2.88626	4.45158	3.82664	4.22636	5.21973	2.26663	4.48531	2.10652	3.22794	4.17095	2.98897	3.38475	3.59146	2.53801	1.90612	3.07261	1.82311	3.21678	3.31308	2.96693	3.99974	2.15828	2.02074	3.28773
	0.928975	1.42731	1.07422	1.84765	1.53157	1.39278	1.58565	1.45742	1.10188				0.928975	3.48756	5.5467	3.70308	5.05667	4.45415	3.86189	4.79845	2.74774	4.51195	3.91206	4.20446	5.18552	2.2911	4.532	2.09905	3.23066	4.17971	2.97439	3.32225	3.57812	2.63401	1.99926	3.02903	1.72233	3.13109	3.34856	2.87739	4.3128	1.98111	1.94591	3.45528
	0.939215	1.35432	0.949783	1.73362	1.47337	1.30346	1.52099	1.37765	1.12135				0.939215	3.47525	5.63641	3.69844	4.94958	4.50225	3.96694	4.78767	2.59048	4.49035	3.92971	4.16113	5.15633	2.34394	4.52964	2.10508	3.21753	4.22303	2.85852	3.27205	3.45671	2.64721	1.93433	3.00342	1.69153	3.03513	3.40962	2.8958	4.23389	1.98437	2.08595	3.46048
	0.949455	1.2988	0.907059	1.60427	1.48806	1.21686	1.41781	1.40174	1.05581				0.949455	3.42779	5.56673	3.67163	4.99843	4.4705	3.87298	4.80258	2.52995	4.45441	3.94865	4.19656	5.16575	2.27882	4.45549	2.03978	3.18379	4.17907	2.88349	3.19687	3.49592	2.51523	1.76178	2.98738	1.58765	3.06895	3.37919	2.7671	4.085	1.82347	2.08595	3.38058
	0.959695	1.32489	0.990555	1.62621	1.50822	1.19862	1.39764	1.43843	1.11456				0.959695	3.36629	5.43719	3.6451	5.03256	4.35814	3.94582	4.75769	2.47406	4.36014	3.94199	4.10875	5.07661	2.01453	4.41298	1.944	3.11779	4.11043	2.85222	3.10263	3.39227	2.4506	1.7215	2.98137	1.51721	3.13081	3.23889	2.72525	3.96095	1.57659	2.17379	3.42672
	0.969935	1.31124	1.00867	1.63279	1.50005	1.1256	1.37775	1.42453	1.10925				0.969935	3.35511	5.48024	3.55155	5.09127	4.3674	3.96532	4.83715	2.40296	4.44833	3.93199	4.15833	5.0687	1.93709	4.37219	1.85647	3.14425	4.09647	2.92859	3.04605	3.40594	2.51593	1.77321	2.87055	1.52031	3.15147	3.12972	2.62286	3.94365	1.48954	2.13159	3.4142
	0.980175	1.25266	0.995605	1.5769	1.50773	1.06232	1.24039	1.32322	1.06246				0.980175	3.35639	5.46215	3.55727	5.18158	4.39452	3.99762	4.93058	2.37383	4.47734	3.84908	4.24487	5.05113	1.84337	4.28598	1.87196	3.20512	4.05976	2.92572	3.0642	3.40343	2.58755	1.81834	2.82228	1.46375	3.21834	3.08517	2.58641	3.95883	1.47568	2.04081	3.45509
	0.990415	1.21987	0.984974	1.55663	1.43459	1.0475	1.25204	1.21321	1.05013				0.990415	3.34979	5.40401	3.54503	5.03082	4.40445	4.0585	4.96633	2.34626	4.56059	3.8407	4.25836	5.08895	1.87188	4.11977	1.86183	3.30473	4.05619	2.94196	3.11084	3.36883	2.65683	1.78348	2.87961	1.41004	3.21301	3.08447	2.3894	3.98153	1.45634	2.05566	3.44318
	1.00066	1.17279	0.827911	1.58963	1.39633	0.911469	1.33801	1.13857	1.00763				1.00066	3.32881	5.41641	3.51813	5.00945	4.40331	4.03308	4.94698	2.25684	4.45996	3.85158	4.23807	5.13961	1.8978	4.03912	1.72916	3.19756	3.95125	2.90231	3.1589	3.42749	2.55849	1.74052	3.0015	1.43833	3.25349	3.02411	2.37366	3.91418	1.42356	2.03552	3.52385
	1.0109	1.1148	0.739578	1.52634	1.39946	0.712566	1.26316	1.15041	1.01209				1.0109	3.30523	5.40651	3.47894	4.95447	4.42841	4.02019	4.89685	2.16104	4.54993	3.8439	4.17045	5.21983	1.89904	3.97475	1.66529	3.0884	3.90016	2.87151	3.17804	3.36446	2.5733	1.72679	2.99226	1.3659	3.29315	2.94558	2.29866	3.93166	1.36935	2.10603	3.48203
	1.02114	1.11891	0.711372	1.58475	1.49846	0.604038	1.23016	1.16663	1.03698				1.02114	3.28566	5.30356	3.46207	4.93623	4.25485	4.01108	4.9152	2.1461	4.64418	3.78729	4.17447	5.21716	1.92329	3.93676	1.5829	3.13276	3.79785	2.88007	3.22275	3.2972	2.59057	1.77569	2.97503	1.31984	3.29299	2.98974	2.2446	3.88694	1.32312	2.11762	3.42785
	1.03138	1.10671	0.704952	1.53729	1.58627	0.60981	1.23322	1.07467	1.00072				1.03138	3.25487	5.29133	3.31754	4.96812	4.1974	3.95181	4.9326	2.08415	4.6308	3.79544	4.05361	5.13069	1.99008	3.90176	1.58498	3.24296	3.73362	2.86064	3.12403	3.24141	2.62317	1.71325	2.98096	1.30895	3.21139	2.92918	2.10622	3.9139	1.41109	2.05261	3.36253
	1.04162	1.04992	0.722309	1.47319	1.46408	0.655346	1.25615	0.947853	0.830536				1.04162	3.25019	5.14942	3.3323	5.01826	4.21094	3.95434	4.97925	2.01707	4.77744	3.88174	4.02557	5.03494	2.05573	3.84273	1.63251	3.33389	3.68287	2.87713	3.07948	3.29744	2.7487	1.68372	2.9374	1.24342	3.19822	2.85798	2.02443	3.85195	1.35969	2.02526	3.39198
	1.05186	1.00939	0.692146	1.40609	1.36137	0.74194	1.19463	0.840851	0.82869				1.05186	3.24185	5.0645	3.32331	4.99178	4.15368	3.8968	5.03817	2.02416	4.84631	3.8284	4.12597	4.94049	2.04572	3.7823	1.66385	3.39059	3.64003	2.87084	3.04689	3.46321	2.75671	1.67188	2.91679	1.24213	3.26364	2.87175	2.01165	3.81705	1.21309	1.96899	3.38474
	1.0621	0.982843	0.665661	1.3988	1.42851	0.689121	1.10095	0.846001	0.750854				1.0621	3.2279	5.1038	3.39561	5.04657	4.10594	3.9529	5.02233	1.90958	4.81589	3.80928	4.12153	4.96767	1.94138	3.79953	1.61711	3.45049	3.63187	2.98946	2.9631	3.46904	2.76903	1.58933	2.97347	1.08207	3.30026	2.8732	1.96394	3.81015	1.06932	1.96111	3.33194
	1.07234	0.991298	0.631447	1.41165	1.42796	0.696022	1.09472	0.898571	0.778717				1.07234	3.21396	5.08553	3.47142	5.04733	4.11811	4.08683	4.96651	1.80101	4.7065	3.78823	4.11702	4.82636	1.93983	3.78853	1.54302	3.46991	3.5968	3.05244	2.90733	3.35263	2.77697	1.65287	2.91442	0.920937	3.38038	2.88398	2.01689	3.73067	1.02011	2.02044	3.43581
	1.08258	1.01048	0.5914	1.38158	1.39106	0.658531	1.24144	0.940674	0.868706				1.08258	3.20001	5.08852	3.51743	5.13726	4.15463	4.06882	5.0166	1.81316	4.66704	3.77807	4.02747	4.82178	1.91928	3.73393	1.5546	3.5458	3.50334	3.01794	2.88404	3.2813	2.80293	1.6263	2.9431	0.880501	3.43952	2.73475	1.90703	3.7119	0.99939	1.97243	3.45153
	1.09282	0.983266	0.512009	1.39277	1.41363	0.634689	1.26896	0.940582	0.720234				1.09282	3.17926	4.9884	3.51294	5.08508	4.25545	4.01822	5.05413	1.79769	4.75837	3.71272	4.04462	4.77799	1.94967	3.5999	1.56784	3.59591	3.36325	3.04731	2.73075	3.27269	2.73353	1.60069	2.96082	0.930138	3.38264	2.63636	1.75933	3.72203	0.940475	2.03078	3.548
	1.10306	0.948238	0.425762	1.49088	1.4216	0.634438	1.07942	0.960976	0.624588				1.10306	3.1701	4.97294	3.41674	4.97422	4.29663	3.91555	5.02649	1.75129	4.74515	3.65329	4.06086	4.74908	2.07249	3.51669	1.5732	3.60656	3.29723	3.03559	2.67384	3.22383	2.77792	1.56125	3.0463	0.903046	3.40063	2.78082	1.68075	3.79147	0.876366	2.10091	3.62189
	1.1133	0.895173	0.342602	1.58125	1.45486	0.541656	0.899628	0.91433	0.531891				1.1133	3.17437	5.04936	3.41224	4.97827	4.24236	3.93754	5.04613	1.71996	4.70562	3.64902	4.07717	4.7135	2.04915	3.49836	1.58404	3.67105	3.20985	3.09753	2.69991	3.27952	2.77926	1.53922	3.03092	0.938507	3.45726	2.80265	1.67737	3.79411	0.810612	2.11856	3.66219
	1.12354	0.837062	0.361271	1.45883	1.37851	0.479012	0.93129	0.835606	0.414917				1.12354	3.16869	5.0425	3.3952	4.98756	4.21991	4.01872	4.99173	1.64759	4.71763	3.60326	4.09515	4.8029	2.06108	3.3261	1.5301	3.72491	3.23747	3.16493	2.75845	3.37251	2.72662	1.41805	3.14069	0.891102	3.57593	2.72376	1.55865	3.73885	0.832569	2.16762	3.58928
	1.13378	0.799656	0.305313	1.39381	1.33906	0.419289	0.970798	0.74387	0.425453				1.13378	3.14885	4.83879	3.22759	5.04019	4.22821	3.98462	4.97659	1.74035	4.73735	3.66584	4.12693	4.83498	2.07161	3.23112	1.44312	3.67705	3.13607	3.20496	2.67117	3.46741	2.77678	1.43065	3.23759	0.872276	3.54352	2.57156	1.51166	3.63892	0.745213	2.2459	3.58757
	1.14402	0.787545	0.326351	1.33624	1.24805	0.445587	1.04149	0.735493	0.379604				1.14402	3.1452	4.71158	3.15029	5.04636	4.23349	3.98129	5.09445	1.77239	4.70506	3.69907	4.24465	4.807	1.94652	3.19793	1.53789	3.73652	3.01582	3.15108	2.52813	3.47943	2.80124	1.43299	3.33648	0.964783	3.53582	2.48562	1.53285	3.60281	0.645508	2.32324	3.6558
	1.15426	0.77319	0.403973	1.24547	1.20861	0.361389	0.949211	0.869865	0.37381				1.15426	3.12675	4.59273	3.08299	4.99341	4.15556	4.06557	5.14235	1.59055	4.67354	3.69044	4.2541	4.85369	1.90925	3.05271	1.4157	3.76341	2.98803	3.12535	2.46428	3.46839	2.86624	1.42673	3.26452	0.950157	3.59353	2.60489	1.50341	3.58178	0.627529	2.36575	3.73584
	1.1645	0.757867	0.409168	1.17831	1.22807	0.268967	0.906185	0.833824	0.480553				1.1645	3.10435	4.54628	3.1549	4.97496	4.20834	4.13058	5.16178	1.51302	4.66406	3.6432	4.23099	4.77725	1.90333	3.00575	1.03594	3.85781	2.94529	3.05991	2.46119	3.48943	2.85609	1.49986	3.16013	0.894249	3.49309	2.58597	1.43103	3.60705	0.623024	2.48627	3.72962
	1.17474	0.720149	0.350243	1.16698	1.188	0.253624	0.897175	0.743465	0.441555				1.17474	3.08398	4.56382	3.16673	4.98096	4.30455	4.12709	5.24423	1.45019	4.80237	3.6867	4.14664	4.61688	1.81067	3.06824	1.01394	3.76028	2.79469	3.1357	2.53627	3.45792	2.82043	1.5272	3.23056	0.82251	3.40036	2.55954	1.32432	3.56613	0.49807	2.35865	3.74366
	1.18498	0.66838	0.204536	1.1187	1.17411	0.247959	0.925133	0.604317	0.4039				1.18498	3.07005	4.49451	3.17359	4.9155	4.21918	3.96013	5.33111	1.42972	4.8577	3.68964	4.05974	4.4497	1.79268	2.95545	1.08757	3.73621	2.72538	3.17182	2.5485	3.48035	2.84681	1.53632	3.32153	0.795067	3.43131	2.59858	1.24997	3.56876	0.46283	2.34837	3.86362
	1.19522	0.596959	0.0505638	0.950737	1.13964	0.202148	0.941582	0.478416	0.41563				1.19522	3.07882	4.47198	3.28044	4.94637	4.22945	3.95538	5.27285	1.44118	4.76273	3.62334	4.10293	4.38065	1.80972	2.86693	1.15678	3.9025	2.70881	3.14149	2.51386	3.52208	2.77164	1.44111	3.39812	0.783394	3.5808	2.66775	1.21357	3.52285	0.443207	2.46656	3.98613
	1.20546	0.537035	0.044281	0.873093	1.10503	0.179581	0.824375	0.386448	0.346443				1.20546	3.09625	4.39928	3.29153	4.98647	4.18281	4.18689	5.1997	1.47815	4.80965	3.55064	4.1058	4.33074	1.83216	2.8107	1.25834	4.04701	2.68463	3.22847	2.51228	3.55293	2.70878	1.35192	3.50648	0.680195	3.67793	2.58719	1.21108	3.56357	0.55537	2.51106	4.08575
	1.2157	0.508927	0.0391541	0.955147	1.00662	0.11422	0.827316	0.467712	0.152321				1.2157	3.09968	4.3913	3.21743	5.00835	4.20607	4.21533	5.20158	1.47396	4.85614	3.58581	4.10845	4.34688	1.80904	2.76284	1.35002	4.05017	2.69038	3.25225	2.46756	3.55331	2.71275	1.40807	3.60471	0.629936	3.70323	2.50604	1.17488	3.60398	0.532806	2.49351	4.07357
	1.22594	0.465846	-0.00284195	0.87735	0.968723	0.0605392	0.824219	0.467113	0.0658226				1.22594	3.09497	4.36657	3.19688	4.9784	4.2057	4.11214	5.31518	1.44167	4.90205	3.53102	4.03878	4.46204	1.81849	2.66008	1.39737	4.14094	2.63904	3.16508	2.45807	3.50504	2.70371	1.45242	3.68869	0.567841	3.8604	2.44969	1.07809	3.61209	0.467907	2.50278	4.13084
	1.23618	0.406452	0.00566864	0.734428	0.953526	-0.0772667	0.801521	0.453777	-0.0264931				1.23618	3.09681	4.39828	3.16743	4.96641	4.24484	4.13503	5.37183	1.40354	4.86412	3.58518	3.98408	4.50089	1.88113	2.53993	1.38154	4.23293	2.57946	3.21201	2.43624	3.54969	2.63762	1.50863	3.81841	0.591633	3.96832	2.42842	0.994671	3.54095	0.422691	2.51082	4.04745
	1.24642	0.42908	-0.0250778	0.752167	1.02333	-0.0298767	0.780411	0.488228	0.0143738				1.24642	3.09776	4.42416	3.1026	4.87544	4.2003	4.15252	5.32114	1.42974	4.95552	3.60424	3.96928	4.409	1.72431	2.54868	1.3069	4.41031	2.61537	3.36147	2.38149	3.61578	2.54061	1.46465	3.93516	0.54847	4.01484	2.42312	0.995872	3.46712	0.433529	2.58528	4.11601
	1.25666	0.429818	-0.0765991	0.878544	1.02263	0.00126648	0.720116	0.480721	-0.0179482				1.25666	3.0939	4.40409	3.10836	4.86393	4.21331	4.18826	5.32591	1.46035	4.9187	3.44642	3.96539	4.27278	1.68295	2.45225	1.28004	4.59052	2.43596	3.34151	2.38964	3.681	2.48708	1.27975	4.05595	0.619232	4.02608	2.36546	1.07848	3.53026	0.485489	2.68252	4.18545
	1.2669	0.395788	-0.120422	0.903564	0.993877	-0.0732841	0.656704	0.469822	-0.059742				1.2669	3.08037	4.40823	3.133	4.79959	4.18627	4.13699	5.33294	1.36275	4.96159	3.39679	3.9162	4.19511	1.81171	2.34675	1.22149	4.63097	2.36732	3.3403	2.35001	3.77729	2.41126	1.34641	4.07069	0.56152	4.18195	2.37996	1.01423	3.48527	0.452065	2.74174	4.09057
	1.27714	0.382523	-0.17157	0.858669	0.973541	-0.0388184	0.624485	0.494961	-0.0636063				1.27714	3.06788	4.36339	3.14479	4.69641	4.17684	4.16162	5.23246	1.4025	4.97068	3.35182	3.91394	4.14203	1.88913	2.28954	1.26786	4.60859	2.23288	3.38069	2.36206	3.81007	2.43815	1.3875	4.07053	0.539776	4.18083	2.33939	0.946922	3.41114	0.356186	2.75544	4.21308
	1.28738	0.362816	-0.241905	0.84507	0.994629	0.0120697	0.536316	0.404999	-0.0114632				1.28738	3.06228	4.33818	3.10207	4.66383	4.16828	4.17571	5.13677	1.37619	4.95924	3.40384	3.86552	4.10118	1.85725	2.34088	1.22959	4.68281	2.21843	3.40636	2.34698	3.7325	2.42619	1.42308	4.13646	0.51503	4.25124	2.36217	0.935646	3.39212	0.32811	2.80183	4.19093
	1.29762	0.270426	-0.24926	0.767117	0.974777	-0.330643	0.547581	0.239487	-0.0560799				1.29762	3.0732	4.32998	3.09414	4.69257	4.24175	4.14159	5.18837	1.38809	4.93124	3.43737	3.85801	4.15572	1.77613	2.39612	1.12497	4.69579	2.27625	3.49187	2.32643	3.64704	2.43339	1.34151	4.26814	0.533768	4.4043	2.41501	0.884697	3.33341	0.293434	2.88869	4.2061
	1.30786	0.231303	-0.176567	0.772076	0.947121	-0.561646	0.533005	0.118347	-0.0132141				1.30786	3.08773	4.33244	3.22966	4.64519	4.43526	4.15334	5.22845	1.5387	4.87915	3.42326	3.7956	4.19305	1.77721	2.28358	1.12663	4.77935	2.24184	3.4865	2.15083	3.68151	2.55644	1.33654	4.2397	0.535736	4.45257	2.45134	0.859009	3.3201	0.286186	2.85831	4.35446
	1.3181	0.232682	-0.11105	0.752491	0.903316	-0.467297	0.461025	0.0616112	0.0286789				1.3181	3.10048	4.4164	3.30158	4.62138	4.53851	4.1702	5.24307	1.54928	4.78644	3.41968	3.76176	4.21092	1.8166	2.1974	1.1392	4.80466	2.13443	3.47456	2.22958	3.7416	2.56337	1.27895	4.32638	0.428806	4.541	2.42622	0.924644	3.35351	0.256073	2.92709	4.43111
	1.32834	0.244395	-0.240166	0.727158	0.897903	-0.334591	0.545982	0.0251579	0.0893173				1.32834	3.1155	4.40533	3.15044	4.70911	4.53236	4.20432	5.31821	1.51473	4.72368	3.44623	3.7249	4.15635	1.8475	2.20275	1.17873	4.87791	2.04574	3.46391	2.38844	3.72147	2.54108	1.26067	4.32317	0.532639	4.55341	2.35769	0.975239	3.44766	0.321041	3.01002	4.53038
	1.33858	0.226406	-0.284916	0.679283	0.847725	-0.248531	0.599365	0.0342178	-0.0423012				1.33858	3.12942	4.41054	3.14656	4.76862	4.65113	4.11477	5.27069	1.55539	4.64365	3.47921	3.70654	4.11746	1.84204	2.09868	1.18343	5.02001	2.00535	3.49094	2.41047	3.6758	2.54153	1.31895	4.36143	0.456844	4.58771	2.42551	0.925766	3.51371	0.403187	3.10805	4.64851
	1.34882	0.19042	-0.225121	0.607246	0.805595	-0.296803	0.518112	-0.0468063	-0.0292816				1.34882	3.14627	4.39609	3.20157	4.72602	4.73037	4.04655	5.32536	1.50458	4.59889	3.35659	3.74339	4.13846	1.85833	2.00037	1.25723	5.00539	2.06939	3.64961	2.3534	3.72951	2.48763	1.37462	4.35923	0.55122	4.61973	2.56673	0.928581	3.50114	0.401031	3.12084	4.78617
	1.35906	0.15514	-0.28458	0.536629	0.840588	-0.288841	0.470634	-0.115128	-0.0733185				1.35906	3.15161	4.43923	3.23024	4.71488	4.73046	4.04202	5.24928	1.42803	4.6506	3.22075	3.71518	4.11744	1.90498	1.90294	1.35056	5.02943	2.04848	3.72836	2.25903	3.80289	2.47001	1.43305	4.38276	0.523708	4.67233	2.55634	0.984116	3.45798	0.464523	3.26607	4.77255
	1.3693	0.117147	-0.360245	0.526043	0.751358	-0.31385	0.421791	-0.12677	-0.0783005				1.3693	3.14376	4.35947	3.20066	4.74025	4.73548	4.02181	5.20041	1.58624	4.67199	3.20514	3.69493	4.00298	1.92196	1.85274	1.36367	5.09697	1.90815	3.78671	2.18841	3.81509	2.44579	1.37814	4.40281	0.469944	4.7135	2.47525	0.907158	3.41306	0.519524	3.39068	4.84385
	1.37954	0.0696438	-0.471214	0.515919	0.715237	-0.425652	0.359173	-0.154095	-0.0518608				1.37954	3.16069	4.24771	3.17582	4.84533	4.8905	4.06043	5.14693	1.66718	4.7048	3.23063	3.72555	4.0261	1.97588	1.78065	1.29823	5.15219	1.78453	3.8195	2.37531	3.87569	2.39602	1.34515	4.4645	0.566994	4.81065	2.39705	0.884209	3.38718	0.547707	3.41558	4.82272
	1.38978	0.0635196	-0.48595	0.503212	0.638992	-0.483875	0.441879	-0.115734	-0.0538864				1.38978	3.16333	4.30838	3.22629	4.80993	4.97808	4.07506	5.16091	1.66951	4.68916	3.18319	3.68506	3.95972	2.05141	1.74298	1.21674	5.15669	1.78425	3.78468	2.41326	3.83958	2.34045	1.24942	4.44871	0.533665	4.85304	2.58073	0.940273	3.38874	0.505852	3.5155	4.80877
	1.40002	0.0747185	-0.475315	0.346832	0.779266	-0.380901	0.471287	-0.0835228	-0.134617				1.40002	3.17377	4.48646	3.28819	4.85408	4.99346	4.10775	5.25422	1.69585	4.58755	3.14454	3.64448	3.96201	2.12609	1.6927	1.20757	5.1941	1.78381	3.90748	2.30765	3.78735	2.31069	1.22542	4.38925	0.470848	4.89498	2.58163	0.929916	3.46207	0.503014	3.60256	4.8175
	1.41026	0.067488	-0.513798	0.347858	0.865646	-0.270504	0.425724	-0.200745	-0.181767				1.41026	3.19361	4.52938	3.30735	4.71608	5.05868	4.09708	5.26543	1.7044	4.58834	3.23002	3.68249	3.86769	2.0876	1.65452	1.20837	5.34104	1.77932	4.06229	2.27274	3.7965	2.3269	1.13446	4.46269	0.518867	5.00881	2.56964	0.994644	3.53564	0.489605	3.63773	4.88012
	1.4205	0.0342772	-0.510948	0.370522	0.836487	-0.283817	0.295357	-0.295738	-0.171921				1.4205	3.19666	4.5741	3.27408	4.71944	5.07116	4.14939	5.3135	1.68996	4.58897	3.20232	3.6039	3.85002	2.0144	1.67376	1.16193	5.41607	1.72808	4.07866	2.20787	3.85358	2.2804	1.11531	4.47372	0.548313	5.04673	2.5836	1.02302	3.54062	0.494469	3.75407	4.86831
	1.43074	-0.0141983	-0.494835	0.322647	0.780373	-0.3367	0.235218	-0.40131	-0.204781				1.43074	3.20795	4.63147	3.24327	4.76463	5.13162	4.1274	5.4008	1.69661	4.53102	3.13312	3.55245	3.92434	2.05079	1.56312	1.1521	5.44088	1.75027	4.06121	2.21902	3.94542	2.28051	1.23812	4.5333	0.517841	5.04933	2.53452	1.06036	3.60686	0.405785	3.81726	4.87497
	1.44098	-0.0366849	-0.545425	0.354164	0.739342	-0.411552	0.294476	-0.519829	-0.167969				1.44098	3.22088	4.69109	3.21223	4.80278	5.22576	4.13951	5.44519	1.65194	4.5008	3.03092	3.51367	3.8722	2.05197	1.54959	1.02319	5.62212	1.75845	4.13731	2.25723	3.96962	2.26457	1.232	4.60987	0.448128	5.01284	2.59416	1.08495	3.6225	0.42791	3.92756	4.94633
	1.45122	-0.0681932	-0.630741	0.318642	0.753647	-0.490814	0.300808	-0.493771	-0.235123				1.45122	3.23355	4.71716	3.23483	4.77571	5.28812	4.1445	5.42332	1.69386	4.48341	3.0889	3.47663	3.83805	2.10072	1.41325	1.06953	5.6899	1.68528	4.22055	2.21748	4.08498	2.26947	1.25011	4.67762	0.424572	5.08055	2.58126	1.13307	3.60987	0.409592	3.92005	5.0041
	1.46146	-0.0960514	-0.676086	0.241783	0.738853	-0.509815	0.29332	-0.3964	-0.364014				1.46146	3.24246	4.69602	3.27474	4.65818	5.27634	4.12805	5.44948	1.82141	4.44801	3.10912	3.5361	3.73323	2.1391	1.36427	1.14414	5.6404	1.56623	4.2627	2.12006	4.08449	2.27577	1.25648	4.72638	0.439499	5.14465	2.62408	1.17953	3.63996	0.445648	3.9828	5.10704
	1.4717	-0.0906988	-0.568958	0.0958633	0.785332	-0.439545	0.191589	-0.294022	-0.405151				1.4717	3.26	4.70436	3.30417	4.60354	5.30772	4.11383	5.43122	1.90782	4.4806	3.13284	3.52866	3.79021	2.22074	1.32224	1.17817	5.62286	1.4781	4.25914	2.17847	4.1156	2.34408	1.24915	4.67725	0.492348	5.20097	2.68859	1.20935	3.65592	0.402439	4.0486	5.1509
	1.48194	-0.11235	-0.588184	0.039772	0.722	-0.39225	0.156933	-0.235718	-0.489002				1.48194	3.26219	4.60867	3.32758	4.635	5.38173	4.09655	5.30597	1.81441	4.4543	2.9994	3.50687	3.9451	2.20915	1.24916	1.18014	5.65857	1.43635	4.26767	2.14283	4.17906	2.40106	1.24099	4.66862	0.467297	5.22333	2.77369	1.30446	3.66552	0.40773	4.13153	5.18297
	1.49218	-0.124046	-0.593063	0.0551987	0.741787	-0.452976	0.156715	-0.227089	-0.548893				1.49218	3.27726	4.64697	3.34922	4.66733	5.43219	4.11438	5.19632	1.71783	4.49177	2.96944	3.49721	3.95359	2.16534	1.19714	1.21665	5.78923	1.4697	4.27592	2.11703	4.1954	2.32397	1.24383	4.73856	0.499451	5.27597	2.91547	1.31098	3.6813	0.472534	4.19292	5.20031
	Contralateral (bottom row)													Contralateral (bottom row)
	Click													Tone sustained
	Time re. IPSP trough(ms)	Mean Vmrel (mV)	Vm rel (mV)	Vm rel (mV)	Vm rel (mV)	Vm rel (mV)	Vm rel (mV)	Vm rel (mV)	Vm rel (mV)	Vm rel (mV)	Vm rel (mV)	Vm rel (mV)		Time re. IPSP trough(ms)	Mean Vmrel (mV)	Vm rel (mV)	Vm rel (mV)	Vm rel (mV)	Vm rel (mV)	Vm rel (mV)	Vm rel (mV)	Vm rel (mV)	Vm rel (mV)	Vm rel (mV)	Vm rel (mV)	Vm rel (mV)
	-1.99967	0.270908	0.089962	0.138672	0.0895309	0.507137	0.279446	0.625473	0.550632	-0.0202103	0.294502	0.153931		-1.99967	-4.04558	-8.63104	-6.10947	-3.4897	-4.77054	-5.31027	-4.9874	-3.55618	-4.86963	-4.89496	-4.79661	-3.55357	-4.0327	-4.77666	-4.72989	-1.93119	-4.27374	-3.8614	-2.58558	-3.47316	-3.91306	-3.57544	-3.40659	-2.98625	-2.43592	-2.86306	-2.72989	-3.24046	-3.97073	-3.56678
	-1.98943	0.26171	0.0284729	0.0792236	0.144035	0.482414	0.380379	0.612709	0.469967	0.00880432	0.250381	0.160713		-1.98943	-4.02594	-8.64167	-6.13511	-3.55251	-4.77103	-5.28633	-4.81948	-3.61409	-4.81588	-4.89046	-4.79918	-3.50229	-3.96823	-4.77702	-4.73211	-2.00808	-4.15377	-3.86479	-2.58765	-3.44125	-3.88968	-3.58767	-3.46491	-2.90738	-2.41525	-2.7994	-2.66796	-3.19205	-3.98177	-3.48529
	-1.97919	0.256296	-0.0661888	0.0347595	0.151188	0.493546	0.402374	0.580959	0.509743	0.143501	0.156956	0.15612		-1.97919	-4.02879	-8.62918	-6.16419	-3.63372	-4.70859	-5.23742	-4.83548	-3.64402	-4.76989	-4.89413	-4.70018	-3.51877	-3.93778	-4.80603	-4.74883	-2.03016	-4.20381	-3.84571	-2.60401	-3.4069	-3.94431	-3.60422	-3.46714	-2.92508	-2.42614	-2.74732	-2.64854	-3.2632	-4.02899	-3.46122
	-1.96895	0.280088	0.0119629	0.0132523	0.250607	0.570557	0.35524	0.660805	0.508804	0.126072	0.0856705	0.217911		-1.96895	-4.03153	-8.51706	-6.16576	-3.62641	-4.761	-5.0938	-4.91636	-3.67083	-4.60777	-4.94469	-4.75439	-3.53959	-3.98497	-4.88734	-4.71074	-2.03887	-4.25829	-3.77387	-2.61396	-3.46196	-3.90878	-3.6448	-3.45256	-3.00082	-2.36633	-2.7888	-2.66964	-3.24547	-4.0204	-3.48906
	-1.95871	0.280431	0.0789948	0.0514946	0.210648	0.537807	0.446159	0.746899	0.499172	0.080677	0.028019	0.124435		-1.95871	-4.03683	-8.56308	-6.06041	-3.61229	-4.72423	-5.08207	-4.98993	-3.70135	-4.56218	-4.89476	-4.84569	-3.58882	-3.91619	-4.94728	-4.67057	-2.05457	-4.28936	-3.80125	-2.67303	-3.44417	-3.94063	-3.66642	-3.46255	-3.06514	-2.42051	-2.78696	-2.68023	-3.19947	-3.93742	-3.48739
	-1.94847	0.293882	0.08815	0.131245	0.25404	0.511929	0.399666	0.726959	0.56221	0.135204	0.036068	0.0933456		-1.94847	-4.01767	-8.46784	-5.97858	-3.58219	-4.63802	-5.04641	-5.04925	-3.53064	-4.48233	-5.04258	-4.81466	-3.6585	-3.92426	-5.02039	-4.66753	-2.01085	-4.22888	-3.81238	-2.64644	-3.4357	-3.959	-3.65667	-3.44216	-3.04779	-2.39861	-2.79109	-2.6702	-3.12774	-3.95481	-3.42703
	-1.93823	0.259151	0.00386047	0.180931	0.220543	0.465302	0.24633	0.651749	0.593922	0.117893	0.0647736	0.0462036		-1.93823	-4.00878	-8.42994	-5.9509	-3.60423	-4.6304	-5.03189	-5.07211	-3.53339	-4.47601	-4.96281	-4.79975	-3.71121	-3.94696	-5.04382	-4.62861	-1.98095	-4.19626	-3.85084	-2.66583	-3.47255	-3.88791	-3.62529	-3.3992	-2.98952	-2.41985	-2.80415	-2.67265	-3.13293	-3.89249	-3.44223
	-1.92799	0.26099	0.00839996	0.194046	0.203533	0.481613	0.326042	0.5784	0.567371	0.0803299	0.106365	0.063797		-1.92799	-4.00382	-8.3632	-6.0097	-3.63792	-4.59304	-4.95557	-5.13987	-3.53671	-4.50396	-4.89825	-4.76466	-3.75196	-3.93737	-5.05712	-4.58664	-2.09136	-4.15789	-3.87014	-2.60653	-3.48973	-3.846	-3.57787	-3.3824	-3.00095	-2.3942	-2.86116	-2.67267	-3.12724	-3.9178	-3.37877
	-1.91775	0.240906	0.0788879	0.101276	0.191517	0.400501	0.357014	0.588398	0.504967	0.0479736	0.193222	-0.0546951		-1.91775	-3.99289	-8.36108	-6.03568	-3.61308	-4.55212	-4.93208	-5.21783	-3.60114	-4.56164	-4.83848	-4.65187	-3.73479	-3.89704	-4.93599	-4.67621	-2.09536	-4.17262	-3.86869	-2.55842	-3.62346	-3.81884	-3.54155	-3.33745	-2.99524	-2.28514	-2.8299	-2.75264	-3.03025	-3.86642	-3.40891
	-1.90751	0.225804	0.113113	0.030323	0.168892	0.403648	0.30405	0.603432	0.435753	0.0893173	0.119682	-0.0101738		-1.90751	-3.99934	-8.35511	-6.1022	-3.59904	-4.57906	-5.03515	-5.23989	-3.70614	-4.5774	-4.85723	-4.63619	-3.66378	-3.83266	-4.92894	-4.68425	-2.2165	-4.15314	-3.79034	-2.57973	-3.59008	-3.76735	-3.53166	-3.29627	-3.13162	-2.27396	-2.8026	-2.76648	-3.02119	-3.87591	-3.38685
	-1.89727	0.220001	0.0597076	-0.0418854	0.230007	0.428848	0.266594	0.570271	0.445839	0.076004	0.00585938	0.158768		-1.89727	-3.98334	-8.3094	-6.21254	-3.6013	-4.58295	-4.91718	-5.2048	-3.72895	-4.47956	-4.85401	-4.72674	-3.60579	-3.832	-4.97145	-4.59342	-2.26895	-4.14154	-3.76706	-2.51629	-3.4873	-3.77516	-3.48675	-3.20675	-3.14547	-2.22797	-2.86672	-2.74459	-2.94072	-3.89887	-3.42261
	-1.88703	0.232628	0.0492058	-0.0332069	0.255684	0.499008	0.229641	0.591618	0.44735	0.102135	-0.0918808	0.27673		-1.88703	-3.97605	-8.36999	-6.254	-3.67391	-4.57491	-4.91829	-5.1649	-3.83004	-4.39105	-4.86846	-4.82086	-3.70769	-3.80814	-4.87579	-4.53429	-2.31184	-4.09021	-3.77881	-2.45881	-3.47367	-3.80809	-3.47484	-3.15809	-3.07421	-2.16421	-2.84456	-2.70873	-2.89504	-3.86461	-3.40751
	-1.87679	0.218542	0.0172348	0.0523987	0.19136	0.432606	0.116821	0.604683	0.493984	0.0921059	-0.0121155	0.196342		-1.87679	-3.98309	-8.37648	-6.32302	-3.63865	-4.5308	-4.94856	-5.21085	-3.805	-4.43966	-4.9632	-4.804	-3.64907	-3.74148	-4.7946	-4.50401	-2.33964	-4.0971	-3.83113	-2.45444	-3.43919	-3.85482	-3.52132	-3.36146	-3.08007	-2.18507	-2.78119	-2.73273	-2.89327	-3.83546	-3.37347
	-1.86655	0.170594	-0.0535774	0.0345421	0.16267	0.347919	0.236206	0.497314	0.510071	0.145432	-0.284332	0.109692		-1.86655	-3.9747	-8.36696	-6.39534	-3.67636	-4.58266	-4.91234	-5.24859	-3.66273	-4.43587	-5.07547	-4.79883	-3.54764	-3.66874	-4.73422	-4.4794	-2.26211	-4.03763	-3.81784	-2.43869	-3.52831	-3.80647	-3.52212	-3.45055	-3.04749	-2.08923	-2.75438	-2.68325	-2.88018	-3.92072	-3.44221
	-1.85631	0.0868671	-0.124695	0.0798759	0.111076	0.24688	0.282806	0.446793	0.330383	0.075264	-0.682205	0.102493		-1.85631	-3.96736	-8.338	-6.37729	-3.63853	-4.6897	-4.83081	-5.23793	-3.53212	-4.38594	-5.06345	-4.80539	-3.54893	-3.64586	-4.70719	-4.52182	-2.24628	-4.01556	-3.71515	-2.38669	-3.58723	-3.86137	-3.51926	-3.4753	-3.12114	-2.11315	-2.69387	-2.67024	-2.87761	-3.94473	-3.50294
	-1.84607	0.101768	-0.188118	0.121517	0.113052	0.263996	0.217896	0.479694	0.192589	0.091217	-0.488667	0.2145		-1.84607	-3.97053	-8.38515	-6.29895	-3.63445	-4.72807	-4.88586	-5.15034	-3.50864	-4.39429	-5.07719	-4.8007	-3.60186	-3.58886	-4.76696	-4.53207	-2.29842	-4.04507	-3.67423	-2.39346	-3.61682	-3.81128	-3.59683	-3.39384	-3.25726	-2.19097	-2.73011	-2.65973	-2.74596	-3.89949	-3.4786
	-1.83583	0.121378	-0.148483	0.118763	0.113815	0.281807	0.153214	0.597389	0.137135	0.0386429	-0.331589	0.253086		-1.83583	-3.97785	-8.35253	-6.2837	-3.539	-4.72984	-4.85557	-5.15358	-3.6222	-4.3688	-5.11771	-4.76767	-3.64814	-3.59351	-4.88218	-4.39722	-2.27947	-3.93853	-3.73687	-2.43808	-3.64741	-3.72696	-3.58572	-3.37623	-3.30789	-2.26257	-2.78966	-2.68487	-2.86295	-3.90322	-3.50543
	-1.82559	0.118964	-0.248211	0.0493011	0.107929	0.239582	0.115177	0.670914	0.184448	0.00410461	-0.217228	0.283619		-1.82559	-3.96804	-8.22052	-6.277	-3.65247	-4.80201	-4.77604	-5.16766	-3.65685	-4.36747	-5.06061	-4.71682	-3.62294	-3.64103	-4.79679	-4.32638	-2.23361	-3.94051	-3.63446	-2.5232	-3.55561	-3.7037	-3.5397	-3.40059	-3.3187	-2.32574	-2.83846	-2.70398	-2.80261	-3.98461	-3.48319
	-1.81535	0.127618	-0.23513	0.0309753	0.16642	0.255058	0.111526	0.689678	0.183125	-0.0259094	-0.292843	0.393276		-1.81535	-3.96304	-8.22387	-6.34362	-3.72165	-4.79273	-4.72948	-5.16145	-3.69031	-4.37419	-5.08487	-4.75589	-3.61934	-3.67543	-4.76405	-4.42879	-2.14278	-3.9364	-3.53641	-2.51477	-3.5424	-3.63538	-3.43828	-3.45949	-3.25242	-2.29124	-2.85934	-2.71412	-2.76432	-4.02608	-3.449
	-1.80511	0.125317	-0.284477	-0.0112076	0.25415	0.190781	-0.00271225	0.633331	0.163624	0.0309448	-0.156921	0.435658		-1.80511	-3.95548	-8.21113	-6.27097	-3.75554	-4.77898	-4.79238	-5.21576	-3.65753	-4.36845	-5.05853	-4.79516	-3.61149	-3.75045	-4.81135	-4.51015	-2.14345	-3.93742	-3.50465	-2.52776	-3.46804	-3.62921	-3.35261	-3.49263	-3.14631	-2.21604	-2.90602	-2.67804	-2.75952	-3.90698	-3.45244
	-1.79487	0.132406	-0.340443	-0.00997162	0.358826	0.196621	0.00667191	0.599808	0.0872345	0.10894	-0.0355415	0.351913		-1.79487	-3.94825	-8.20498	-6.22733	-3.87404	-4.8602	-4.83799	-5.21775	-3.72975	-4.33246	-5.05725	-4.79001	-3.65332	-3.78112	-4.80803	-4.54012	-2.22617	-3.9505	-3.54453	-2.48296	-3.29491	-3.57219	-3.32118	-3.44902	-3.09888	-2.14824	-2.96055	-2.55351	-2.81295	-3.83757	-3.33163
	-1.78463	0.105883	-0.444153	-0.00717926	0.287491	0.308796	0.0272102	0.500389	3.05176e-05	0.161762	-0.113625	0.338108		-1.78463	-3.94087	-8.19419	-6.23552	-3.89281	-4.85994	-4.729	-5.15597	-3.6884	-4.36809	-5.18075	-4.68579	-3.64072	-3.74161	-4.89875	-4.48283	-2.29699	-3.96382	-3.60919	-2.45742	-3.27915	-3.60183	-3.35182	-3.31503	-3.13506	-2.06472	-2.9332	-2.5916	-2.87158	-3.75372	-3.30586
	-1.77439	0.117529	-0.413055	-0.0493011	0.387222	0.34893	0.0809631	0.502342	0.00307083	0.149281	-0.16058	0.326416		-1.77439	-3.95221	-8.20812	-6.27708	-3.8196	-4.79249	-4.58453	-5.26118	-3.70599	-4.33566	-5.28571	-4.61211	-3.64783	-3.70082	-4.87566	-4.48542	-2.39712	-3.88783	-3.61564	-2.50735	-3.35123	-3.63955	-3.4054	-3.3475	-3.16851	-2.06683	-2.92805	-2.67644	-2.95981	-3.72972	-3.34082
	-1.76415	0.131179	-0.287148	-0.0920105	0.390751	0.416538	0.0471573	0.420017	-0.0316887	0.297314	-0.176792	0.327656		-1.76415	-3.9478	-8.18331	-6.19902	-3.80072	-4.74993	-4.58683	-5.27417	-3.5941	-4.29292	-5.35628	-4.6029	-3.69361	-3.64184	-4.91605	-4.51032	-2.55457	-3.86111	-3.61193	-2.44138	-3.38681	-3.61621	-3.44343	-3.37757	-3.23821	-1.97157	-2.96775	-2.62088	-2.93492	-3.64413	-3.41364
	-1.75391	0.14277	-0.256031	-0.0370674	0.325806	0.391941	-0.0307846	0.400208	0.0664749	0.417595	-0.212975	0.362534		-1.75391	-3.9397	-8.23843	-6.15043	-3.85327	-4.75676	-4.57225	-5.28369	-3.53366	-4.23889	-5.30844	-4.57248	-3.71431	-3.60856	-4.81309	-4.58785	-2.60233	-3.98043	-3.57669	-2.34069	-3.52138	-3.52975	-3.41803	-3.33902	-3.2091	-1.98728	-2.92429	-2.56302	-2.93856	-3.63498	-3.45361
	-1.74367	0.115456	-0.315647	-0.0895691	0.254604	0.401184	-0.109547	0.405403	0.0813217	0.472637	-0.206394	0.260563		-1.74367	-3.92273	-8.18884	-6.20156	-3.82438	-4.79531	-4.50503	-5.28028	-3.56181	-4.17633	-5.33122	-4.57791	-3.63091	-3.50016	-4.84334	-4.60105	-2.60795	-3.96361	-3.0607	-2.31482	-3.54569	-3.59615	-3.54884	-3.33654	-3.18304	-2.01492	-2.94461	-2.62406	-2.95385	-3.63681	-3.40959
	-1.73343	0.0984425	-0.395985	-0.318188	0.190708	0.277405	-0.00906372	0.595455	0.00757599	0.519272	-0.242668	0.359913		-1.73343	-3.92498	-8.16969	-6.21593	-3.77767	-4.8227	-4.44999	-5.34777	-3.60707	-4.17384	-5.36391	-4.53211	-3.62944	-3.47736	-4.86228	-4.61363	-2.64476	-3.91196	-3.04552	-2.34562	-3.51546	-3.69024	-3.58438	-3.32335	-3.20393	-2.04023	-2.95871	-2.57121	-2.87867	-3.67707	-3.39
	-1.72319	0.065625	-0.377457	-0.401539	0.100323	0.281448	0.0478935	0.544926	-0.150875	0.447971	-0.176041	0.3396		-1.72319	-3.91461	-8.17048	-6.17936	-3.82483	-4.91223	-4.43301	-5.26966	-3.66229	-4.09254	-5.34717	-4.51671	-3.55641	-3.41983	-4.80693	-4.50856	-2.67833	-3.93007	-3.18927	-2.5055	-3.44533	-3.62323	-3.54414	-3.23019	-3.28936	-2.09513	-2.96194	-2.55315	-2.74839	-3.66715	-3.36239
	-1.71295	0.0350475	-0.3102	-0.355774	0.0852394	0.204895	0.00386047	0.468559	-0.111179	0.269695	-0.206966	0.302345		-1.71295	-3.9104	-8.24656	-6.08434	-3.88682	-4.85746	-4.41846	-5.29547	-3.68062	-4.07209	-5.40482	-4.48045	-3.57685	-3.41375	-4.78064	-4.50649	-2.67245	-3.88043	-3.26388	-2.52028	-3.42366	-3.63469	-3.60521	-3.17443	-3.27532	-2.01273	-2.96414	-2.58225	-2.69383	-3.62758	-3.36589
	-1.70271	0.0373955	-0.260181	-0.347893	0.108654	0.201015	-0.0121078	0.438957	-0.03125	0.157265	-0.1684	0.287895		-1.70271	-3.91781	-8.32808	-6.12479	-3.8545	-4.88719	-4.40984	-5.28108	-3.72497	-4.06499	-5.44922	-4.51422	-3.59218	-3.46733	-4.72943	-4.51735	-2.66179	-3.86626	-3.30857	-2.45124	-3.31757	-3.64773	-3.57163	-3.22335	-3.23468	-2.00705	-3.04026	-2.61102	-2.6518	-3.66614	-3.41227
	-1.69247	0.0436634	-0.246384	-0.351791	0.0881386	0.159832	-0.0873489	0.472923	-0.0944786	0.253731	-0.094059	0.336071		-1.69247	-3.91701	-8.31681	-6.11461	-3.85225	-4.85402	-4.33995	-5.29665	-3.7253	-4.13472	-5.49664	-4.51833	-3.65609	-3.44696	-4.73982	-4.51271	-2.62818	-3.94213	-3.36878	-2.45238	-3.24065	-3.57013	-3.50206	-3.22201	-3.14923	-2.05326	-3.11919	-2.71029	-2.59963	-3.67554	-3.35492
	-1.68223	0.0348354	-0.171917	-0.425201	0.0673027	0.199444	-0.106552	0.453716	-0.195221	0.242729	-0.114063	0.398117		-1.68223	-3.90127	-8.26551	-6.0847	-3.76477	-4.77085	-4.30207	-5.3916	-3.84656	-4.17868	-5.47132	-4.58956	-3.63911	-3.49126	-4.79635	-4.4894	-2.5231	-3.864	-3.46498	-2.41928	-3.31945	-3.44559	-3.5145	-3.2103	-3.06097	-1.9488	-3.02604	-2.81404	-2.60532	-3.54781	-3.29097
	-1.67199	0.00445251	-0.133533	-0.494095	-0.0525665	0.16151	-0.105114	0.364563	-0.160603	0.315674	-0.189941	0.338631		-1.67199	-3.88799	-8.2165	-6.05795	-3.74486	-4.77616	-4.25488	-5.32143	-3.96522	-4.11253	-5.45346	-4.5144	-3.62296	-3.55367	-4.80851	-4.43349	-2.56118	-3.83291	-3.45334	-2.40562	-3.336	-3.35757	-3.55379	-3.22472	-3.03848	-2.00264	-3.00309	-2.81024	-2.55815	-3.45967	-3.31832
	-1.66175	0.00866928	-0.185471	-0.429371	-0.0758209	0.048645	-0.13092	0.296837	-0.101498	0.393124	-0.225643	0.496811		-1.66175	-3.91048	-8.15921	-6.00428	-3.78873	-4.76838	-4.2698	-5.28859	-4.08919	-4.07553	-5.57861	-4.37889	-3.66437	-3.66503	-4.79789	-4.44669	-2.61272	-3.81141	-3.46852	-2.50211	-3.42406	-3.38115	-3.57796	-3.27868	-2.98137	-2.04932	-3.02016	-2.8069	-2.57093	-3.48779	-3.45555
	-1.65151	-0.0028244	-0.282543	-0.406712	-0.0402985	0.0441971	-0.159363	0.310417	-0.207512	0.334839	-0.20694	0.58567		-1.65151	-3.93047	-8.07435	-6.0495	-3.80788	-4.87693	-4.34568	-5.27408	-4.07635	-4.04385	-5.62088	-4.42299	-3.68992	-3.72102	-4.90807	-4.39672	-2.66339	-3.80597	-3.40203	-2.56038	-3.53934	-3.49792	-3.58542	-3.293	-2.98323	-1.99885	-3.09344	-2.73238	-2.53609	-3.51131	-3.4727
	-1.64127	-0.0176807	-0.319508	-0.368145	-0.0309258	0.0392723	-0.19936	0.268791	-0.298492	0.290306	-0.147598	0.588852		-1.64127	-3.91751	-8.13671	-5.94467	-3.83236	-4.86192	-4.34568	-5.22292	-4.13131	-4.00934	-5.60414	-4.42392	-3.66418	-3.79445	-4.91084	-4.40936	-2.68942	-3.72174	-3.34139	-2.56668	-3.4834	-3.53788	-3.59261	-3.26866	-2.95336	-1.88843	-3.19434	-2.79046	-2.499	-3.40205	-3.38664
	-1.63103	-0.0152348	-0.295311	-0.18882	-0.00169754	0.0567017	-0.28965	0.209503	-0.317959	0.322159	-0.13456	0.487286		-1.63103	-3.9103	-8.16071	-5.951	-3.84805	-4.86543	-4.36505	-5.24897	-4.21878	-3.93534	-5.61844	-4.34129	-3.66037	-3.74787	-4.87978	-4.41615	-2.68661	-3.66448	-3.29454	-2.59651	-3.38027	-3.53944	-3.58574	-3.33265	-2.99367	-1.904	-3.23872	-2.75256	-2.50699	-3.30176	-3.36346
	-1.62079	-0.0213596	-0.453812	-0.0184555	-0.00494003	-0.000495911	-0.38047	0.236732	-0.249237	0.290924	-0.179008	0.545166		-1.62079	-3.90257	-8.11025	-5.97968	-3.91362	-4.93119	-4.3446	-5.32084	-4.1904	-3.93493	-5.60011	-4.33752	-3.62061	-3.56567	-4.86547	-4.40614	-2.70941	-3.63426	-3.31844	-2.6785	-3.37325	-3.49674	-3.50966	-3.24962	-3.09674	-1.9264	-3.18969	-2.70435	-2.55164	-3.1758	-3.43896
	-1.61055	-0.0218384	-0.341896	-0.054863	-0.168556	-0.0193787	-0.267094	0.436119	-0.264671	0.257355	-0.226013	0.430614		-1.61055	-3.88645	-8.06181	-6.00979	-3.87828	-4.94239	-4.31616	-5.35575	-4.27717	-3.98947	-5.55017	-4.25453	-3.63238	-3.48918	-4.8989	-4.32479	-2.7503	-3.49842	-3.3215	-2.62569	-3.39179	-3.46701	-3.45821	-3.14719	-3.16156	-1.91928	-3.25116	-2.57896	-2.61592	-3.14002	-3.39923
	-1.60031	-0.027504	-0.348896	-0.269192	-0.220364	-0.0810432	-0.205296	0.535461	-0.216644	0.312263	-0.157146	0.375816		-1.60031	-3.88189	-7.98561	-5.97283	-3.84972	-4.94682	-4.21478	-5.24275	-4.41076	-3.94766	-5.58485	-4.21753	-3.66113	-3.56824	-4.87082	-4.29124	-2.86931	-3.51338	-3.2813	-2.71284	-3.41207	-3.47426	-3.46186	-3.16919	-3.0648	-1.95777	-3.28147	-2.58113	-2.54499	-3.16843	-3.31739
	-1.59007	-0.0358505	-0.337891	-0.334496	-0.140789	-0.104858	-0.20583	0.532871	-0.22506	0.248463	-0.179581	0.388664		-1.59007	-3.88359	-8.02283	-5.94038	-3.95787	-4.97977	-4.05968	-5.1537	-4.42316	-3.90524	-5.67037	-4.33519	-3.62961	-3.58754	-4.88517	-4.21874	-2.92133	-3.64133	-3.31096	-2.73896	-3.46097	-3.40989	-3.42326	-3.09612	-2.99632	-1.94601	-3.37306	-2.66603	-2.40871	-3.16819	-3.29385
	-1.57983	-0.044952	-0.371834	-0.329998	-0.0937157	-0.0385475	-0.210686	0.475117	-0.293045	0.218555	-0.276108	0.470741		-1.57983	-3.89245	-8.01873	-5.86424	-4.04409	-4.92747	-4.10263	-5.18273	-4.45225	-3.92747	-5.73973	-4.33747	-3.72262	-3.62291	-4.90521	-4.21765	-2.95553	-3.77776	-3.37001	-2.71927	-3.5043	-3.31234	-3.35209	-3.01466	-3.05833	-1.92733	-3.32079	-2.68556	-2.3733	-3.10912	-3.3355
	-1.56959	-0.0256851	-0.332825	-0.238461	0.00846863	0.0917397	-0.210957	0.468666	-0.361557	0.156502	-0.36433	0.525902		-1.56959	-3.88359	-8.02442	-5.79831	-4.12302	-4.93457	-4.11481	-5.20534	-4.53217	-3.88769	-5.76354	-4.20436	-3.77776	-3.58523	-4.95345	-4.15759	-2.98249	-3.75444	-3.27884	-2.71549	-3.39801	-3.32164	-3.31494	-3.04638	-3.13603	-1.87501	-3.25183	-2.7099	-2.26619	-3.12806	-3.38263
	-1.55935	-0.0577965	-0.328331	-0.219147	0.0306091	0.0788879	-0.299473	0.368065	-0.321129	0.0623055	-0.382477	0.432724		-1.55935	-3.86359	-7.9913	-5.79905	-4.05651	-4.95671	-4.04271	-5.09713	-4.55196	-3.92731	-5.77089	-4.10963	-3.71181	-3.6435	-5.03331	-4.19755	-3.02256	-3.64611	-3.27026	-2.5896	-3.3458	-3.31163	-3.35529	-2.99048	-3.16256	-1.84409	-3.2722	-2.65046	-2.19275	-3.06432	-3.4367
	-1.54911	-0.0551617	-0.34137	-0.244503	-0.0113449	0.0610085	-0.192757	0.365524	-0.286179	0.0570984	-0.380138	0.421043		-1.54911	-3.86343	-8.00371	-5.88679	-3.95365	-4.90874	-4.03587	-5.05831	-4.62713	-3.95612	-5.76931	-4.10721	-3.6852	-3.68509	-5.03506	-4.12152	-3.06653	-3.52553	-3.26737	-2.5283	-3.38635	-3.28283	-3.4327	-3.00941	-3.13218	-1.83146	-3.29116	-2.70544	-2.20332	-3.13172	-3.41143
	-1.53887	-0.0625942	-0.301987	-0.381496	-0.0172195	-0.0351486	-0.140694	0.423237	-0.267414	0.122971	-0.436764	0.408573		-1.53887	-3.869	-7.9898	-5.87643	-3.87282	-5.00524	-4.00059	-5.2019	-4.60178	-3.87436	-5.75988	-4.10478	-3.75201	-3.58655	-5.00307	-4.1527	-3.09724	-3.60984	-3.24373	-2.52309	-3.41262	-3.24492	-3.4556	-3.03954	-3.10958	-1.80628	-3.24547	-2.66251	-2.3273	-3.17812	-3.46333
	-1.52863	-0.0669956	-0.249664	-0.388355	-0.11694	-0.0214157	-0.245502	0.465614	-0.22562	0.167294	-0.450542	0.395176		-1.52863	-3.88388	-7.92176	-5.90548	-3.95591	-5.112	-4.15878	-5.12008	-4.71531	-3.75411	-5.762	-4.18367	-3.81411	-3.60062	-4.83055	-4.18748	-3.02045	-3.65424	-3.26345	-2.54481	-3.38646	-3.21063	-3.4219	-3.07261	-3.18312	-1.72175	-3.21952	-2.75732	-2.48732	-3.16471	-3.50234
	-1.51839	-0.0669975	-0.228672	-0.39267	-0.0981293	0.0586815	-0.287727	0.510761	-0.222652	0.100117	-0.393169	0.283485		-1.51839	-3.88632	-7.88417	-5.87462	-4.06271	-5.15449	-4.10316	-5.0712	-4.70565	-3.67901	-5.66693	-4.15256	-3.81124	-3.69543	-4.81408	-4.21049	-3.02752	-3.66057	-3.17664	-2.60865	-3.39799	-3.19175	-3.43636	-3.06859	-3.13507	-1.82996	-3.2824	-2.72524	-2.56435	-3.21628	-3.49618
	-1.50815	-0.0684383	-0.301579	-0.445156	-0.15728	0.217827	-0.309891	0.527046	-0.30069	0.15752	-0.29287	0.220688		-1.50815	-3.87544	-7.89609	-5.80725	-4.08025	-4.94105	-4.10854	-5.01859	-4.68515	-3.69853	-5.76615	-4.18763	-3.89938	-3.64045	-4.78884	-4.23256	-3.06318	-3.57062	-3.14743	-2.6236	-3.29475	-3.18969	-3.39874	-3.07528	-3.10537	-1.95063	-3.34482	-2.74276	-2.41336	-3.33051	-3.38666
	-1.49791	-0.1073	-0.41024	-0.393768	-0.245422	0.116104	-0.292892	0.429459	-0.321751	0.142437	-0.323059	0.226135		-1.49791	-3.89582	-7.92411	-5.87696	-4.12741	-4.97388	-4.1872	-4.98195	-4.7268	-3.83696	-5.67142	-4.16443	-3.98302	-3.64611	-4.83046	-4.21109	-3.1505	-3.47337	-3.12716	-2.657	-3.2642	-3.112	-3.35983	-3.19949	-3.09454	-2.03192	-3.4263	-2.89202	-2.32428	-3.39383	-3.33043
	-1.48767	-0.12516	-0.484341	-0.364296	-0.158329	-0.0647507	-0.320747	0.38913	-0.235802	0.14127	-0.364323	0.21059		-1.48767	-3.89195	-8.00573	-5.81406	-4.12753	-4.99152	-4.16752	-4.98354	-4.73158	-3.89749	-5.6153	-4.11031	-3.96058	-3.58648	-4.84841	-4.32145	-3.14412	-3.52416	-3.1952	-2.68364	-3.21296	-3.06255	-3.34687	-3.21963	-3.13496	-2.01072	-3.36648	-2.85888	-2.38101	-3.31356	-3.25024
	-1.47743	-0.100398	-0.436573	-0.298386	-0.0478439	-0.0945358	-0.242897	0.389763	-0.163368	0.105293	-0.425819	0.210388		-1.47743	-3.89873	-8.02308	-5.70968	-4.16721	-4.95259	-4.09951	-4.91559	-4.8181	-3.8617	-5.65747	-4.10765	-4.042	-3.56728	-4.8618	-4.2881	-3.12756	-3.64486	-3.2653	-2.70953	-3.29815	-3.1041	-3.41006	-3.26789	-3.13446	-2.08381	-3.31393	-2.83376	-2.40841	-3.219	-3.17053
	-1.46719	-0.12633	-0.428181	-0.37513	-0.0472832	-0.0255508	-0.340599	0.365612	-0.154846	0.0781822	-0.474377	0.138874		-1.46719	-3.88913	-8.0183	-5.69812	-4.08846	-4.88564	-4.03564	-4.92099	-4.75619	-3.85594	-5.6957	-4.12346	-4.0375	-3.66874	-4.91801	-4.24746	-3.01347	-3.75273	-3.27152	-2.68609	-3.38914	-3.17139	-3.39711	-3.25302	-3.07452	-2.03479	-3.35871	-2.81359	-2.31549	-3.12086	-3.18221
	-1.45695	-0.119837	-0.449699	-0.376968	-0.130444	0.0814896	-0.394371	0.453644	-0.111561	0.0409889	-0.433235	0.121788		-1.45695	-3.89727	-7.9821	-5.65249	-3.99546	-4.91576	-4.1825	-4.9752	-4.79762	-3.92222	-5.79173	-4.11024	-4.05469	-3.70715	-4.91869	-4.24549	-3.09512	-3.67174	-3.24205	-2.597	-3.44219	-3.24132	-3.38507	-3.29396	-3.04739	-1.94347	-3.39162	-2.79664	-2.25554	-3.21677	-3.14957
	-1.44671	-0.102328	-0.503151	-0.334671	-0.238281	0.105949	-0.38604	0.543018	-0.0497513	0.0510521	-0.406914	0.195511		-1.44671	-3.90721	-7.97873	-5.69362	-3.96177	-4.80127	-4.1904	-5.02526	-4.79324	-3.93318	-5.72345	-4.11591	-4.09126	-3.7868	-4.94573	-4.19677	-3.26361	-3.65104	-3.09735	-2.61142	-3.41507	-3.24353	-3.42137	-3.24603	-3.10275	-2.0331	-3.44495	-2.89843	-2.27408	-3.24026	-3.12864
	-1.43647	-0.140129	-0.665405	-0.418858	-0.20924	0.0415154	-0.353935	0.569553	-0.0920944	0.0104713	-0.465515	0.18222		-1.43647	-3.91732	-8.0703	-5.61583	-3.96842	-4.81533	-4.14491	-5.00489	-4.86905	-3.9454	-5.7985	-4.1529	-4.09476	-3.82931	-4.93392	-4.15877	-3.26401	-3.67758	-2.95117	-2.75141	-3.26936	-3.17079	-3.47011	-3.2727	-3.13144	-2.21923	-3.38254	-2.93158	-2.23157	-3.3409	-3.13549
	-1.42623	-0.172666	-0.680084	-0.404076	-0.156372	-0.0266266	-0.404854	0.456425	-0.133278	-0.0400085	-0.56992	0.232132		-1.42623	-3.9213	-8.02559	-5.58702	-4.03569	-4.79235	-4.23955	-4.97076	-4.85811	-3.89277	-5.8483	-4.17124	-4.17045	-3.76641	-4.86175	-4.23755	-3.28875	-3.72618	-2.98268	-2.70587	-3.2216	-3.11253	-3.5414	-3.29679	-3.18477	-2.17543	-3.38986	-2.89843	-2.14059	-3.41994	-3.17521
	-1.41599	-0.187774	-0.601032	-0.441387	-0.163273	-0.171726	-0.374023	0.485283	-0.18837	0.0228233	-0.626965	0.180931		-1.41599	-3.9261	-7.94201	-5.64235	-4.03643	-4.85434	-4.2596	-5.06312	-4.83543	-3.86947	-5.82906	-4.10646	-4.108	-3.75569	-4.78902	-4.26352	-3.38124	-3.76413	-3.03016	-2.63785	-3.32977	-3.01432	-3.54969	-3.29105	-3.25352	-2.06634	-3.43797	-2.92377	-2.1161	-3.51571	-3.19091
	-1.40575	-0.224907	-0.643593	-0.448151	-0.308231	-0.20079	-0.415962	0.527744	-0.199871	0.0682411	-0.67057	0.0421104		-1.40575	-3.95228	-7.95029	-5.59685	-4.01447	-4.92999	-4.3255	-5.08818	-4.87175	-3.92999	-5.96122	-4.05981	-4.0957	-3.79328	-4.82663	-4.21958	-3.37509	-3.77005	-3.09872	-2.67224	-3.39458	-2.96899	-3.57684	-3.37001	-3.27375	-2.09827	-3.42225	-2.9967	-2.16863	-3.5345	-3.23222
	-1.39551	-0.270146	-0.742786	-0.446171	-0.412968	-0.161697	-0.428932	0.416348	-0.25832	0.0667648	-0.698109	-0.0355911		-1.39551	-3.93273	-7.95462	-5.65638	-3.97607	-4.82904	-4.27505	-4.99122	-4.81229	-3.82453	-5.84529	-4.09207	-4.08778	-3.84819	-4.82694	-4.18603	-3.40659	-3.72364	-3.06216	-2.69038	-3.44191	-2.96067	-3.50684	-3.39112	-3.30383	-2.21561	-3.3761	-2.92756	-2.19666	-3.46986	-3.17072
	-1.38527	-0.29502	-0.833897	-0.416656	-0.4636	-0.177734	-0.513069	0.348446	-0.260929	0.0908432	-0.697544	-0.026062		-1.38527	-3.92217	-7.94451	-5.57562	-3.98095	-4.76379	-4.19373	-4.96556	-4.84569	-3.72921	-5.69319	-4.12762	-4.06396	-3.8417	-4.86163	-4.21152	-3.34067	-3.65077	-3.07048	-2.74099	-3.45459	-2.98438	-3.50815	-3.4532	-3.25929	-2.27391	-3.35485	-2.99028	-2.20424	-3.46221	-3.19624
	-1.37503	-0.328391	-0.895756	-0.550671	-0.449722	-0.169163	-0.619179	0.315315	-0.28376	0.0719147	-0.694683	-0.00820541		-1.37503	-3.94597	-7.94355	-5.62853	-4.03506	-4.78732	-4.20908	-4.99002	-4.81777	-3.63128	-5.66063	-4.21195	-4.05787	-3.83022	-4.82528	-4.3257	-3.40059	-3.79076	-3.13906	-2.80475	-3.46545	-2.97383	-3.4709	-3.51565	-3.41105	-2.19279	-3.37374	-3.07385	-2.24978	-3.48267	-3.13388
	-1.36479	-0.371067	-0.862999	-0.75552	-0.536602	-0.243301	-0.589684	0.255974	-0.233868	0.121063	-0.791878	-0.0738564		-1.36479	-3.95629	-7.93583	-5.55951	-4.14399	-4.80582	-4.27148	-4.97898	-4.86714	-3.62569	-5.7313	-4.11513	-4.07672	-3.74797	-4.84369	-4.41214	-3.50653	-3.74498	-3.1191	-2.90471	-3.37309	-3.00201	-3.55281	-3.56305	-3.42467	-2.21646	-3.35757	-3.11248	-2.28611	-3.42366	-3.02967
	-1.35455	-0.38519	-0.90329	-0.78688	-0.543598	-0.201752	-0.667591	0.308605	-0.193932	0.0138817	-0.824661	-0.0526848		-1.35455	-3.95545	-8.02924	-5.52194	-4.1515	-4.76277	-4.27769	-4.94637	-5.03411	-3.58142	-5.77278	-4.0836	-4.02745	-3.63793	-4.93194	-4.3761	-3.44927	-3.67833	-3.09502	-3.03475	-3.31828	-3.07826	-3.53667	-3.55847	-3.41399	-2.22038	-3.37869	-3.1562	-2.19859	-3.42137	-3.03483
	-1.34431	-0.419924	-0.928406	-0.798767	-0.548126	-0.135105	-0.727226	0.319836	-0.27713	-0.184914	-0.88908	-0.0303192		-1.34431	-3.96472	-7.9794	-5.50515	-4.13696	-4.75314	-4.25417	-4.90991	-5.17902	-3.54974	-5.81846	-4.1211	-4.03709	-3.63974	-4.87778	-4.40725	-3.45475	-3.76689	-3.06546	-3.06035	-3.38895	-3.11159	-3.53665	-3.53252	-3.50003	-2.32769	-3.42702	-3.07362	-2.1672	-3.41777	-2.97755
	-1.33407	-0.447576	-0.933319	-0.774616	-0.558998	-0.156406	-0.707199	0.293655	-0.324291	-0.216858	-0.96965	-0.128075		-1.33407	-3.99229	-7.97332	-5.5891	-4.2086	-4.76735	-4.26108	-5.01882	-5.19646	-3.56752	-5.78074	-4.27813	-4.21142	-3.62651	-4.89103	-4.24865	-3.60193	-3.77974	-3.08167	-2.94794	-3.47523	-3.20998	-3.53038	-3.43777	-3.60467	-2.37056	-3.55257	-3.05338	-2.20019	-3.31938	-2.99224
	-1.32383	-0.503034	-1.10979	-0.775284	-0.592392	-0.17107	-0.790733	0.264175	-0.445145	-0.226692	-1.04039	-0.143021		-1.32383	-3.99145	-7.9419	-5.59995	-4.29621	-4.7639	-4.20924	-5.09027	-5.21328	-3.5437	-5.70974	-4.21534	-4.21783	-3.72929	-4.85701	-4.25551	-3.61816	-3.81236	-2.97419	-2.94826	-3.45243	-3.12411	-3.5233	-3.41174	-3.64109	-2.4052	-3.56182	-3.12916	-2.20524	-3.31816	-2.98357
	-1.31359	-0.509364	-1.1214	-0.72047	-0.571014	-0.190025	-0.904446	0.300724	-0.489349	-0.209301	-1.00449	-0.183872		-1.31359	-3.98339	-8.00578	-5.5309	-4.43176	-4.69273	-4.1595	-5.12355	-5.20967	-3.54089	-5.64245	-4.10368	-4.24766	-3.70211	-4.82863	-4.3771	-3.53791	-3.77497	-2.89211	-2.9389	-3.45069	-3.14263	-3.45129	-3.42014	-3.61316	-2.40891	-3.50429	-3.11445	-2.18171	-3.40778	-3.08303
	-1.30335	-0.507641	-1.03511	-0.79586	-0.484032	-0.159828	-0.912086	0.222321	-0.523514	-0.137142	-1.08273	-0.168423		-1.30335	-3.99661	-8.06405	-5.41772	-4.46384	-4.67173	-4.10054	-5.12228	-5.24213	-3.61061	-5.70068	-4.09311	-4.23568	-3.75177	-4.82749	-4.41999	-3.4719	-3.62658	-3.01184	-2.91797	-3.51249	-3.1351	-3.50003	-3.45401	-3.6457	-2.42919	-3.43336	-3.19284	-2.1573	-3.51523	-3.17665
	-1.29311	-0.554045	-1.06799	-0.955383	-0.584694	-0.154739	-0.870422	0.143097	-0.566246	-0.0993538	-1.19968	-0.18504		-1.29311	-4.02919	-8.04999	-5.43229	-4.44062	-4.75816	-4.17331	-5.02843	-5.22189	-3.69353	-5.74977	-4.1183	-4.19428	-3.77635	-4.80008	-4.44319	-3.63588	-3.67281	-3.09547	-2.93152	-3.57951	-3.12631	-3.61923	-3.5	-3.66231	-2.42125	-3.45881	-3.34153	-2.21237	-3.53619	-3.17315
	-1.28287	-0.6081	-1.14133	-1.11112	-0.761276	-0.236744	-0.920204	0.127048	-0.481888	-0.164719	-1.1838	-0.206966		-1.28287	-4.03132	-8.05165	-5.49652	-4.44921	-4.74808	-4.26146	-5.02112	-5.27091	-3.62219	-5.74524	-4.1262	-4.19774	-3.70822	-4.83649	-4.30698	-3.73811	-3.7467	-3.1445	-2.91938	-3.48048	-3.02932	-3.64745	-3.53659	-3.68706	-2.39024	-3.49282	-3.39381	-2.17237	-3.49635	-3.19094
	-1.27263	-0.680466	-1.31914	-1.12777	-0.927109	-0.326683	-1.05311	0.0711021	-0.532082	-0.185387	-1.17147	-0.233009		-1.27263	-4.0311	-8.00426	-5.53101	-4.51991	-4.6827	-4.27743	-5.02149	-5.27913	-3.52949	-5.70504	-4.18286	-4.22596	-3.73106	-4.81335	-4.25486	-3.78858	-3.79985	-3.11517	-2.87107	-3.4732	-2.99062	-3.6514	-3.66499	-3.72946	-2.48491	-3.41321	-3.30125	-2.17543	-3.49467	-3.18967
	-1.26239	-0.70351	-1.38216	-1.1423	-0.948551	-0.375774	-1.18095	0.121063	-0.51799	-0.141354	-1.19128	-0.275806		-1.26239	-4.02366	-8.02122	-5.56125	-4.59431	-4.70139	-4.19867	-4.98702	-5.24578	-3.60354	-5.64042	-4.29513	-4.16219	-3.66335	-4.87549	-4.25707	-3.79366	-3.7049	-3.07652	-2.83498	-3.53632	-2.90053	-3.65869	-3.73502	-3.6816	-2.59225	-3.42355	-3.20932	-2.14356	-3.45108	-3.13741
	-1.25215	-0.727715	-1.43225	-1.32452	-0.88076	-0.259998	-1.24429	0.0536957	-0.561043	-0.155991	-1.21382	-0.258186		-1.25215	-4.04477	-7.96799	-5.50753	-4.7058	-4.69493	-4.27238	-4.99487	-5.29573	-3.65497	-5.58505	-4.23293	-4.24213	-3.68451	-4.97668	-4.22363	-3.86409	-3.86012	-3.01246	-2.9032	-3.56707	-2.82634	-3.74102	-3.68351	-3.73265	-2.59347	-3.50652	-3.21859	-2.17371	-3.41586	-3.16049
	-1.24191	-0.780076	-1.47829	-1.54276	-0.890305	-0.312798	-1.32475	0.0914154	-0.592274	-0.247711	-1.25126	-0.252014		-1.24191	-4.06035	-8.04834	-5.48697	-4.74706	-4.6998	-4.35794	-5.02078	-5.26563	-3.70256	-5.5686	-4.2537	-4.29165	-3.68842	-5.11285	-4.21774	-3.95197	-3.79189	-2.98561	-2.92155	-3.50615	-2.88443	-3.68769	-3.516	-3.70074	-2.61137	-3.59397	-3.2876	-2.18004	-3.4701	-3.19912
	-1.23167	-0.815656	-1.59371	-1.5219	-0.95145	-0.314121	-1.33056	0.15889	-0.584724	-0.284081	-1.43788	-0.297016		-1.23167	-4.06069	-8.14368	-5.50513	-4.78562	-4.61507	-4.36901	-5.03839	-5.26392	-3.71209	-5.64662	-4.20371	-4.25904	-3.61978	-5.07439	-4.29699	-3.94181	-3.679	-2.93733	-2.92419	-3.55342	-2.94947	-3.70214	-3.47537	-3.72515	-2.61735	-3.56939	-3.33508	-2.19075	-3.48224	-3.14394
	-1.22143	-0.831752	-1.63732	-1.5061	-0.993698	-0.448792	-1.32969	0.171978	-0.544956	-0.275162	-1.5144	-0.239376		-1.22143	-4.07613	-8.10289	-5.53752	-4.84252	-4.66446	-4.38845	-4.97992	-5.33743	-3.6868	-5.67729	-4.16772	-4.26463	-3.6101	-5.08814	-4.24809	-3.92799	-3.75668	-2.93757	-2.91529	-3.67036	-3.00692	-3.77927	-3.54821	-3.76019	-2.54969	-3.61795	-3.35895	-2.13206	-3.44871	-3.20205
	-1.21119	-0.871271	-1.71513	-1.5413	-1.02444	-0.498123	-1.42266	0.15144	-0.573296	-0.283092	-1.63248	-0.173634		-1.21119	-4.08208	-7.99918	-5.53233	-4.82854	-4.65275	-4.51157	-5.06464	-5.34639	-3.68912	-5.73692	-4.16881	-4.3203	-3.65115	-5.04005	-4.18853	-3.95622	-3.8567	-2.87219	-2.84524	-3.67236	-2.99935	-3.6937	-3.56876	-3.84688	-2.62022	-3.56659	-3.3744	-2.14355	-3.45755	-3.17627
	-1.20095	-0.924374	-1.77187	-1.61851	-1.10099	-0.487919	-1.56266	0.104172	-0.623173	-0.340527	-1.70961	-0.132652		-1.20095	-4.0914	-7.87074	-5.45217	-4.87641	-4.56502	-4.55111	-5.14896	-5.41817	-3.59186	-5.79502	-4.13441	-4.32293	-3.66503	-5.04936	-4.15973	-3.94072	-3.83796	-2.81197	-2.76034	-3.72455	-3.13588	-3.71925	-3.64825	-3.91341	-2.61363	-3.52825	-3.47581	-2.26392	-3.49059	-3.18505
	-1.19071	-0.992837	-1.83006	-1.73811	-1.18986	-0.582306	-1.59497	-0.0324669	-0.636833	-0.435585	-1.73743	-0.150757		-1.19071	-4.10544	-7.87458	-5.4395	-4.88031	-4.67458	-4.50692	-4.96806	-5.4459	-3.57302	-5.81902	-4.03444	-4.31236	-3.76216	-5.08992	-4.15589	-4.0408	-3.77965	-2.91712	-2.83809	-3.81247	-3.15852	-3.73404	-3.57619	-3.81747	-2.69751	-3.54048	-3.5614	-2.29704	-3.53539	-3.21504
	-1.18047	-1.0521	-1.95576	-1.92142	-1.24611	-0.593014	-1.62809	-0.0771713	-0.582867	-0.478428	-1.76908	-0.269058		-1.18047	-4.12595	-7.93918	-5.42761	-4.92649	-4.78972	-4.4278	-4.89838	-5.43573	-3.62925	-5.79213	-3.99821	-4.43127	-3.80237	-5.1425	-4.2163	-4.15118	-3.81057	-2.96635	-2.84178	-3.82942	-3.09107	-3.76164	-3.64337	-3.81491	-2.69244	-3.53114	-3.54949	-2.3083	-3.53683	-3.26699
	-1.17023	-1.10039	-2.02658	-1.99148	-1.37715	-0.738625	-1.67463	-0.0213432	-0.608089	-0.385502	-1.81722	-0.363304		-1.17023	-4.15176	-8.03361	-5.43579	-4.9355	-4.7314	-4.43646	-4.9076	-5.35643	-3.6489	-5.8186	-3.99572	-4.40915	-3.76839	-5.27801	-4.27116	-4.26847	-3.84314	-2.99625	-2.82212	-3.79562	-3.07122	-3.73106	-3.68493	-3.87912	-2.82192	-3.62815	-3.49675	-2.39537	-3.61504	-3.32508
	-1.15999	-1.16728	-2.00846	-2.08962	-1.4971	-0.783749	-1.75226	-0.0071106	-0.742455	-0.362831	-1.96793	-0.461311		-1.15999	-4.16278	-8.07919	-5.38902	-4.96278	-4.74879	-4.47856	-4.93767	-5.43656	-3.67886	-5.71496	-3.97269	-4.40308	-3.67745	-5.30914	-4.21881	-4.26458	-3.97713	-2.90835	-2.7883	-3.86231	-3.0498	-3.6656	-3.76777	-3.87989	-2.93585	-3.73443	-3.44719	-2.45179	-3.64787	-3.33217
	-1.14975	-1.21184	-2.08022	-2.13919	-1.53286	-0.81007	-1.85794	-0.0156326	-0.897713	-0.231712	-2.05491	-0.498146		-1.14975	-4.16972	-8.12592	-5.35767	-4.97236	-4.71419	-4.435	-5.00002	-5.38539	-3.72472	-5.71601	-3.94162	-4.34817	-3.61469	-5.3703	-4.19196	-4.22507	-4.10699	-2.83101	-2.89382	-3.94055	-2.9879	-3.7128	-3.85542	-3.83997	-2.96017	-3.81516	-3.47668	-2.37307	-3.6502	-3.35498
	-1.13951	-1.24793	-2.19822	-2.22071	-1.53276	-0.744514	-1.91539	-0.0667992	-0.975231	-0.243729	-2.12905	-0.452881		-1.13951	-4.16378	-8.0391	-5.32524	-4.96365	-4.6787	-4.5951	-5.03441	-5.38073	-3.71475	-5.79209	-3.91302	-4.25238	-3.66181	-5.40986	-4.21976	-4.20008	-4.06871	-2.88017	-2.93158	-3.95951	-2.93448	-3.82441	-3.83383	-3.76774	-2.9307	-3.73263	-3.488	-2.25335	-3.63037	-3.33344
	-1.12927	-1.27799	-2.23265	-2.28607	-1.60876	-0.763683	-2.0097	-0.100128	-0.990658	-0.213604	-2.20372	-0.370903		-1.12927	-4.17364	-8.0861	-5.37177	-5.02798	-4.56752	-4.66108	-5.08674	-5.34233	-3.71773	-5.86183	-3.88922	-4.17124	-3.70483	-5.40502	-4.20472	-4.26954	-3.95316	-2.82642	-2.91614	-3.96661	-2.95927	-3.8118	-3.86946	-3.80899	-3.01931	-3.74653	-3.56656	-2.22068	-3.61954	-3.38351
	-1.11903	-1.34612	-2.50761	-2.41351	-1.62642	-0.770359	-2.03335	-0.113922	-1.10979	-0.229767	-2.36041	-0.296074		-1.11903	-4.18897	-8.12851	-5.38112	-5.05046	-4.63402	-4.65568	-5.1327	-5.33487	-3.65309	-5.8322	-3.90715	-4.2302	-3.72279	-5.39505	-4.1972	-4.29016	-3.99677	-2.7928	-2.96015	-3.93392	-3.07824	-3.84636	-3.9101	-3.90243	-3.08396	-3.62899	-3.60241	-2.24135	-3.58889	-3.36864
	-1.10879	-1.37978	-2.6444	-2.48431	-1.6273	-0.835007	-2.177	-0.108391	-1.11348	-0.234074	-2.32386	-0.249928		-1.10879	-4.20104	-8.27583	-5.42755	-5.14671	-4.70435	-4.6718	-5.02868	-5.42847	-3.54548	-5.81505	-3.93805	-4.32588	-3.62174	-5.43303	-4.14056	-4.2706	-3.94086	-2.75781	-2.89584	-3.96074	-3.17821	-3.92779	-4.03565	-3.95278	-3.15873	-3.5536	-3.52816	-2.28144	-3.51957	-3.36511
	-1.09855	-1.4042	-2.74089	-2.57771	-1.59068	-0.780529	-2.29113	-0.114635	-1.1419	-0.174385	-2.33261	-0.297565		-1.09855	-4.21274	-8.30723	-5.52089	-5.12004	-4.73574	-4.63731	-5.12368	-5.56509	-3.52708	-5.88286	-3.8874	-4.43422	-3.59442	-5.446	-4.15647	-4.26258	-3.95617	-2.75806	-2.87528	-3.91675	-3.21211	-3.92603	-4.04148	-3.89603	-3.19683	-3.66799	-3.41917	-2.19168	-3.5549	-3.35598
	-1.08831	-1.46339	-2.69504	-2.64627	-1.70775	-0.784534	-2.363	-0.237492	-1.29342	-0.16584	-2.33343	-0.407093		-1.08831	-4.22635	-8.35725	-5.55808	-5.08952	-4.81338	-4.67421	-5.11658	-5.65941	-3.5314	-5.86309	-3.83246	-4.49222	-3.56363	-5.43752	-4.13811	-4.23125	-3.97338	-2.81309	-2.81535	-3.97234	-3.22625	-3.96196	-4.09116	-3.91562	-3.19736	-3.71268	-3.42675	-2.18646	-3.58407	-3.32968
	-1.07807	-1.5375	-2.6848	-2.68848	-1.80432	-1.02437	-2.43421	-0.368671	-1.30898	-0.203659	-2.45097	-0.406498		-1.07807	-4.23785	-8.43445	-5.6239	-5.06136	-4.79854	-4.62515	-5.13453	-5.65624	-3.57766	-5.72842	-3.79538	-4.49177	-3.50385	-5.39787	-4.14378	-4.35996	-3.96653	-2.89968	-2.84556	-3.98883	-3.24124	-3.93326	-4.05698	-3.9418	-3.17908	-3.70673	-3.54078	-2.22688	-3.61968	-3.41772
	-1.06783	-1.62067	-2.76675	-2.76223	-1.82419	-1.17469	-2.57502	-0.389214	-1.32511	-0.269131	-2.53169	-0.588634		-1.06783	-4.23566	-8.36624	-5.61082	-5.02407	-4.86654	-4.49135	-5.05595	-5.66312	-3.63618	-5.63	-3.85629	-4.40475	-3.63028	-5.35101	-4.14246	-4.37104	-3.94465	-2.91486	-2.85999	-3.9631	-3.30534	-4.05816	-3.95478	-3.89018	-3.23109	-3.78574	-3.53835	-2.24635	-3.63315	-3.40842
	-1.05759	-1.65784	-2.81103	-2.89604	-1.89433	-1.2411	-2.62925	-0.378601	-1.3622	-0.249523	-2.53499	-0.581291		-1.05759	-4.25139	-8.36131	-5.53086	-5.01441	-4.90421	-4.44041	-5.13403	-5.74245	-3.51981	-5.62741	-3.95119	-4.45107	-3.72248	-5.38542	-4.14164	-4.41571	-4.0178	-2.90955	-2.79553	-4.03888	-3.20618	-4.20189	-3.97351	-3.87785	-3.24232	-3.86832	-3.51805	-2.26535	-3.6314	-3.40134
	-1.04735	-1.66924	-2.84423	-2.89719	-1.87256	-1.35099	-2.65508	-0.409691	-1.41092	-0.232533	-2.58174	-0.437492		-1.04735	-4.26657	-8.37609	-5.38549	-5.09672	-4.88477	-4.54466	-5.15454	-5.786	-3.5449	-5.65753	-3.94397	-4.4332	-3.6905	-5.469	-4.13209	-4.44117	-4.01477	-2.97668	-2.76215	-4.03635	-3.18737	-4.23045	-4.03899	-3.89553	-3.33855	-3.86338	-3.54118	-2.26489	-3.61012	-3.4294
	-1.03711	-1.7262	-2.86979	-2.97405	-1.98962	-1.45287	-2.72908	-0.437954	-1.45969	-0.265125	-2.71916	-0.364712		-1.03711	-4.27329	-8.45383	-5.40725	-5.10451	-4.9002	-4.61916	-5.16208	-5.73298	-3.60936	-5.7261	-3.87088	-4.4557	-3.61654	-5.48477	-4.17902	-4.41712	-3.98957	-2.92095	-2.70495	-3.99568	-3.18749	-4.29698	-4.00769	-3.88452	-3.43748	-3.8248	-3.57215	-2.40946	-3.57227	-3.38198
	-1.02687	-1.80865	-2.94945	-3.06538	-2.10999	-1.56732	-2.83342	-0.450317	-1.61858	-0.318935	-2.79346	-0.379684		-1.02687	-4.27472	-8.58345	-5.3902	-5.10654	-4.92057	-4.68063	-5.12439	-5.65507	-3.67114	-5.67603	-3.84092	-4.42383	-3.59439	-5.55478	-4.10321	-4.34067	-3.94704	-2.84644	-2.75516	-4.07051	-3.12825	-4.30932	-3.91397	-3.9293	-3.55477	-3.82323	-3.6355	-2.46018	-3.5541	-3.37324
	-1.01663	-1.89305	-3.02054	-3.22435	-2.28736	-1.60906	-2.95686	-0.564148	-1.7461	-0.336292	-2.75939	-0.42643		-1.01663	-4.28951	-8.55218	-5.35204	-5.08047	-4.99506	-4.70259	-5.08153	-5.64965	-3.67851	-5.70621	-3.80478	-4.43878	-3.53651	-5.66784	-4.13364	-4.27071	-3.88824	-2.92685	-2.77833	-4.23837	-3.13579	-4.34591	-3.81899	-3.99322	-3.58901	-3.78913	-3.7818	-2.4467	-3.60154	-3.41148
	-1.00639	-1.96404	-3.16464	-3.39549	-2.38572	-1.71489	-3.02141	-0.560715	-1.7236	-0.319508	-2.90417	-0.450249		-1.00639	-4.29538	-8.43261	-5.36252	-5.02431	-4.97417	-4.72295	-5.0454	-5.60466	-3.65779	-5.75537	-3.80919	-4.49054	-3.61799	-5.6561	-4.21998	-4.27741	-3.97122	-3.02297	-2.73241	-4.2709	-3.1826	-4.31834	-3.91178	-4.05513	-3.70104	-3.75613	-3.66746	-2.32235	-3.61718	-3.38561
	-0.99615	-2.01755	-3.27423	-3.53214	-2.44538	-1.71624	-3.11257	-0.544361	-1.71117	-0.336578	-2.98955	-0.513294		-0.99615	-4.30189	-8.43456	-5.4016	-4.96066	-4.98103	-4.81665	-5.04187	-5.59428	-3.65676	-5.81774	-3.77551	-4.51645	-3.71482	-5.63837	-4.30889	-4.3486	-3.90157	-2.97396	-2.66628	-4.26311	-3.16585	-4.26833	-3.99618	-3.95868	-3.73803	-3.86874	-3.58431	-2.33407	-3.58431	-3.44355
	-0.98591	-2.08231	-3.4159	-3.68449	-2.52349	-1.65444	-3.16767	-0.644608	-1.79708	-0.310486	-3.07112	-0.553848		-0.98591	-4.30748	-8.48453	-5.36958	-5.00343	-5.01965	-4.87268	-4.96397	-5.58855	-3.62336	-5.82067	-3.80122	-4.55739	-3.67342	-5.63855	-4.30592	-4.35331	-3.9698	-2.9052	-2.68	-4.12998	-3.18531	-4.19768	-4.08639	-3.92844	-3.72134	-3.92964	-3.64732	-2.4773	-3.51294	-3.46925
	-0.97567	-2.11858	-3.39207	-3.74803	-2.70149	-1.65779	-3.22716	-0.614948	-1.86971	-0.295349	-3.06084	-0.618389		-0.97567	-4.31804	-8.55112	-5.39741	-5.00665	-4.96809	-4.73627	-4.87809	-5.6151	-3.70213	-5.71842	-3.86821	-4.51414	-3.63003	-5.65709	-4.29198	-4.38458	-4.0169	-2.95842	-2.72004	-4.15196	-3.25874	-4.16316	-4.06954	-4.01947	-3.67949	-4.05764	-3.68425	-2.49503	-3.54606	-3.48313
	-0.96543	-2.18776	-3.41945	-3.73888	-2.73163	-1.84359	-3.32629	-0.652531	-2.08123	-0.373367	-3.07508	-0.635532		-0.96543	-4.33449	-8.54198	-5.3625	-5.04682	-4.9303	-4.75743	-4.92049	-5.64809	-3.58205	-5.67519	-3.85048	-4.5351	-3.61522	-5.63952	-4.27031	-4.44998	-4.12973	-3.00828	-2.81627	-4.22373	-3.26779	-4.23684	-4.11451	-3.99846	-3.64983	-4.07681	-3.65133	-2.54725	-3.61418	-3.53981
	-0.95519	-2.28072	-3.47903	-3.8079	-2.77419	-2.00076	-3.42566	-0.739521	-2.19376	-0.500587	-3.18473	-0.701065		-0.95519	-4.3706	-8.58136	-5.46511	-5.09887	-5.02161	-4.79798	-4.95747	-5.62589	-3.61025	-5.69265	-3.83047	-4.60967	-3.61163	-5.64254	-4.24315	-4.50187	-4.06871	-3.04465	-2.93832	-4.36102	-3.21452	-4.30314	-4.26377	-4.06453	-3.69277	-4.0435	-3.63327	-2.62219	-3.6509	-3.55546
	-0.94495	-2.34386	-3.54417	-3.95802	-2.93551	-2.03306	-3.51881	-0.780552	-2.17854	-0.476784	-3.28467	-0.728516		-0.94495	-4.39816	-8.55841	-5.50356	-5.07972	-5.13281	-4.88425	-4.96687	-5.61879	-3.64825	-5.71672	-3.82859	-4.69409	-3.60383	-5.68051	-4.29022	-4.63276	-4.11963	-3.07827	-2.98291	-4.37282	-3.15139	-4.33828	-4.3076	-4.06403	-3.66223	-3.99557	-3.71479	-2.73492	-3.67869	-3.50628
	-0.93471	-2.41449	-3.62347	-4.13267	-3.10035	-2.13095	-3.54285	-0.734562	-2.20393	-0.502281	-3.38015	-0.79369		-0.93471	-4.42655	-8.61752	-5.57785	-5.13269	-5.11688	-5.00758	-4.91985	-5.67278	-3.73845	-5.66304	-3.83297	-4.64941	-3.63898	-5.69943	-4.35476	-4.66558	-4.09517	-3.04943	-3.07822	-4.39891	-3.0952	-4.45525	-4.29634	-4.04838	-3.67133	-4.04354	-3.6777	-2.77123	-3.77803	-3.62344
	-0.92447	-2.49692	-3.67316	-4.20525	-3.27607	-2.2799	-3.62434	-0.875549	-2.23473	-0.499649	-3.49832	-0.8022		-0.92447	-4.4277	-8.66697	-5.60481	-5.11615	-5.07924	-5.09093	-5.02043	-5.69007	-3.7634	-5.78084	-3.84247	-4.55314	-3.61482	-5.61974	-4.32186	-4.6806	-4.07011	-3.0115	-3.06811	-4.34215	-3.07088	-4.44838	-4.24611	-4.07026	-3.71806	-4.05328	-3.71861	-2.7576	-3.71635	-3.66648
	-0.91423	-2.57084	-3.79247	-4.19529	-3.35006	-2.27513	-3.78178	-1.01681	-2.37507	-0.518959	-3.59118	-0.811691		-0.91423	-4.4337	-8.6651	-5.66664	-5.07659	-5.10699	-5.10746	-4.9818	-5.64882	-3.69992	-5.82499	-3.73651	-4.61738	-3.67073	-5.63813	-4.41959	-4.76567	-4.04092	-3.0617	-3.02333	-4.32808	-3.21265	-4.38882	-4.1524	-3.95969	-3.84971	-4.07728	-3.75132	-2.77826	-3.6699	-3.65693
	-0.903989	-2.64563	-3.84323	-4.30413	-3.43783	-2.32766	-4.07042	-1.09209	-2.45084	-0.49073	-3.63512	-0.804214		-0.903989	-4.43661	-8.70008	-5.70034	-5.03088	-5.12289	-5.14238	-4.6654	-5.62656	-3.80706	-5.80337	-3.81257	-4.66013	-3.74186	-5.71333	-4.44576	-4.67117	-4.06052	-3.00815	-3.07627	-4.23852	-3.27205	-4.36604	-4.21095	-3.89234	-3.89228	-3.9755	-3.80433	-2.84748	-3.72722	-3.64627
	-0.893749	-2.70185	-3.87015	-4.42111	-3.49502	-2.40314	-4.27525	-1.14449	-2.48596	-0.487465	-3.57422	-0.86171		-0.893749	-4.45642	-8.71212	-5.79293	-5.05713	-5.18278	-5.15956	-4.64145	-5.55614	-3.84473	-5.88273	-3.90465	-4.57157	-3.78083	-5.78538	-4.48427	-4.75203	-4.09597	-3.01688	-3.17783	-4.19585	-3.3218	-4.44976	-4.27945	-3.82151	-3.87559	-4.04076	-3.78604	-2.80756	-3.71031	-3.54854
	-0.883509	-2.77439	-3.95058	-4.57458	-3.5636	-2.50475	-4.3648	-1.23016	-2.63433	-0.413033	-3.59702	-0.911072		-0.883509	-4.47034	-8.7706	-5.68434	-4.96949	-5.29551	-5.14957	-4.79578	-5.56528	-3.86523	-5.85803	-3.96827	-4.57612	-3.72741	-5.79176	-4.55455	-4.79327	-4.06191	-3.01474	-3.2585	-4.2861	-3.28797	-4.50734	-4.24465	-3.94497	-3.81664	-3.99901	-3.70407	-2.90572	-3.63006	-3.6129
	-0.873269	-2.84203	-4.00982	-4.63183	-3.59296	-2.72038	-4.36678	-1.23616	-2.7385	-0.418823	-3.63272	-1.07236		-0.873269	-4.4957	-8.80914	-5.69283	-5.01067	-5.4113	-5.04042	-4.88933	-5.54656	-3.71896	-5.80617	-3.97999	-4.62367	-3.72178	-5.73945	-4.70358	-4.78498	-4.02102	-3.00986	-3.36262	-4.32827	-3.30273	-4.61213	-4.2182	-3.97391	-3.82479	-4.01453	-3.83136	-3.04427	-3.63485	-3.71777
	-0.863029	-2.90925	-3.96588	-4.68641	-3.60107	-2.89672	-4.4985	-1.31297	-2.81763	-0.509003	-3.72586	-1.07851		-0.863029	-4.50722	-8.82134	-5.65221	-5.05943	-5.31999	-5.03743	-4.96799	-5.51321	-3.70582	-5.72011	-3.93995	-4.63409	-3.78745	-5.63016	-4.77089	-4.84272	-4.0216	-3.0548	-3.32229	-4.427	-3.33866	-4.75723	-4.1907	-4.03823	-3.87458	-4.12845	-3.79032	-3.02678	-3.58366	-3.7523
	-0.852789	-3.01033	-4.04183	-4.83212	-3.71909	-2.88804	-4.64146	-1.44305	-2.8621	-0.61467	-3.81787	-1.24311		-0.852789	-4.52018	-8.81507	-5.61731	-5.05773	-5.35978	-5.15662	-5.12029	-5.57697	-3.75373	-5.75787	-3.94282	-4.63679	-3.75658	-5.61673	-4.76416	-4.72356	-4.08183	-3.08623	-3.32278	-4.49366	-3.39724	-4.76384	-4.18025	-4.01021	-4.00342	-4.06882	-3.77398	-2.90827	-3.59706	-3.74176
	-0.842549	-3.07639	-4.00715	-4.87971	-3.83046	-2.84646	-4.793	-1.52103	-2.98795	-0.671619	-3.87701	-1.34951		-0.842549	-4.51969	-8.80681	-5.57133	-4.97451	-5.34999	-5.14892	-5.31289	-5.60855	-3.67984	-5.73423	-3.97404	-4.566	-3.67257	-5.70664	-4.77862	-4.69987	-4.15799	-3.12631	-3.32408	-4.40485	-3.40315	-4.71375	-4.22071	-4.04529	-4.00626	-4.00318	-3.8011	-2.82891	-3.7316	-3.71902
	-0.832309	-3.16396	-4.11222	-5.00792	-3.94724	-2.93385	-4.90973	-1.51567	-3.13399	-0.702026	-3.93069	-1.44631		-0.832309	-4.55919	-8.85485	-5.64986	-4.96899	-5.45623	-5.23111	-5.3399	-5.59406	-3.66695	-5.71328	-3.98912	-4.59813	-3.63518	-5.72731	-4.73559	-4.78686	-4.24088	-3.16614	-3.38683	-4.4036	-3.38293	-4.81833	-4.20009	-4.0944	-3.95924	-4.11955	-3.86536	-3.0167	-3.87448	-3.74042
	-0.822069	-3.21844	-4.21246	-5.11791	-4.05194	-3.10053	-4.90012	-1.48637	-3.17655	-0.797276	-3.88205	-1.45916		-0.822069	-4.5872	-8.83781	-5.66838	-4.96496	-5.4973	-5.26797	-5.28607	-5.66558	-3.5801	-5.70694	-3.96579	-4.66486	-3.71568	-5.79721	-4.70837	-4.77845	-4.24433	-3.18853	-3.42015	-4.34462	-3.42781	-4.8469	-4.27367	-4.07057	-4.0264	-4.26733	-3.97211	-3.11295	-3.9289	-3.79898
	-0.811829	-3.29254	-4.27397	-5.14868	-4.16574	-3.29642	-4.92385	-1.52335	-3.31585	-0.869087	-3.88604	-1.52242		-0.811829	-4.60236	-8.89877	-5.68633	-4.99518	-5.42779	-5.20425	-5.30135	-5.61568	-3.68312	-5.77571	-3.92766	-4.78388	-3.76483	-5.7593	-4.75026	-4.83341	-4.23035	-3.16956	-3.41058	-4.42607	-3.56698	-4.82249	-4.27936	-4.05904	-4.16266	-4.26616	-3.98911	-3.08912	-3.86897	-3.72057
	-0.801589	-3.33748	-4.27576	-5.21931	-4.23312	-3.38282	-5.03052	-1.56	-3.33523	-0.833694	-3.95873	-1.54566		-0.801589	-4.60585	-8.96773	-5.61844	-5.01947	-5.36725	-5.18993	-5.30181	-5.48932	-3.78131	-5.80127	-3.90529	-4.82198	-3.75862	-5.76682	-4.68974	-4.94082	-4.24832	-3.24944	-3.53969	-4.44261	-3.55971	-4.72264	-4.26795	-3.99907	-4.23055	-4.2418	-3.994	-3.12487	-3.8133	-3.71592
	-0.791349	-3.40118	-4.28483	-5.33057	-4.20386	-3.47645	-5.08522	-1.6427	-3.39945	-0.84589	-4.0601	-1.68268		-0.791349	-4.61517	-8.99229	-5.68875	-5.09164	-5.43229	-5.24773	-5.27253	-5.50207	-3.77368	-5.84883	-3.85773	-4.78017	-3.75906	-5.87298	-4.65128	-4.95539	-4.31714	-3.27519	-3.57761	-4.47833	-3.44581	-4.70232	-4.19855	-3.9376	-4.23367	-4.27452	-3.94873	-3.18782	-3.8119	-3.72432
	-0.781109	-3.48144	-4.3849	-5.45135	-4.2188	-3.56803	-5.1433	-1.72829	-3.54896	-0.845772	-4.15404	-1.77092		-0.781109	-4.6336	-9.05959	-5.77934	-5.13796	-5.5179	-5.23995	-5.23094	-5.54144	-3.66458	-5.8745	-3.79171	-4.81567	-3.66935	-5.92861	-4.53209	-4.99184	-4.31039	-3.37264	-3.60427	-4.51243	-3.41983	-4.68721	-4.28927	-3.937	-4.26663	-4.28823	-3.9737	-3.28905	-3.79507	-3.8531
	-0.770869	-3.57218	-4.47653	-5.50734	-4.39648	-3.64248	-5.20491	-1.87292	-3.73263	-0.902981	-4.18166	-1.8039		-0.770869	-4.63818	-9.06155	-5.70094	-5.11939	-5.60311	-5.24107	-5.21362	-5.54406	-3.66921	-5.78162	-3.76775	-4.72227	-3.66568	-5.96003	-4.43698	-5.0145	-4.37194	-3.4216	-3.6344	-4.63496	-3.49686	-4.61253	-4.31024	-4.03889	-4.2468	-4.27811	-3.90467	-3.32114	-3.82321	-3.91009
	-0.760629	-3.65374	-4.52154	-5.57154	-4.46159	-3.81262	-5.32645	-1.92501	-3.80519	-0.918797	-4.23424	-1.96046		-0.760629	-4.6688	-9.24166	-5.65911	-5.16839	-5.60138	-5.24285	-5.28262	-5.60279	-3.69431	-5.68937	-3.82303	-4.75311	-3.5918	-5.96881	-4.54537	-5.08229	-4.27765	-3.47766	-3.58224	-4.63175	-3.57473	-4.67601	-4.34533	-4.08139	-4.3399	-4.24889	-3.95683	-3.3519	-3.86878	-4.03537
	-0.750389	-3.71318	-4.48582	-5.55249	-4.47087	-3.97334	-5.55412	-2.00767	-3.74126	-0.95076	-4.35994	-2.03551		-0.750389	-4.69369	-9.25433	-5.73556	-5.188	-5.50272	-5.30244	-5.29624	-5.61232	-3.66251	-5.77526	-3.97361	-4.74634	-3.68049	-5.96003	-4.68471	-5.10781	-4.25814	-3.53447	-3.63633	-4.50145	-3.59475	-4.85035	-4.40318	-4.09877	-4.3869	-4.23061	-3.99632	-3.37197	-3.77364	-3.99765
	-0.740149	-3.76504	-4.47583	-5.72128	-4.5508	-3.92956	-5.57489	-2.12414	-3.76192	-1.0149	-4.33152	-2.16558		-0.740149	-4.71484	-9.24584	-5.80009	-5.14123	-5.53198	-5.41293	-5.318	-5.58511	-3.55205	-5.76243	-3.98912	-4.7496	-3.82656	-6.04154	-4.6828	-5.14364	-4.3049	-3.4846	-3.73698	-4.50022	-3.60477	-4.91717	-4.37018	-4.0853	-4.42885	-4.28292	-4.07306	-3.38427	-3.78586	-3.98849
	-0.729909	-3.83727	-4.5293	-5.77872	-4.71811	-4.0033	-5.62995	-2.23785	-3.84166	-1.11589	-4.3799	-2.13801		-0.729909	-4.7176	-9.2618	-5.78284	-5.18758	-5.57953	-5.34166	-5.37076	-5.56993	-3.55176	-5.79804	-3.96754	-4.79848	-3.87288	-5.98271	-4.66213	-5.16448	-4.234	-3.51238	-3.76644	-4.48093	-3.53119	-4.85846	-4.37472	-4.1779	-4.37216	-4.21617	-4.04345	-3.44659	-3.90343	-4.00034
	-0.719669	-3.91307	-4.60217	-5.75623	-4.78523	-4.05054	-5.75902	-2.33839	-3.94768	-1.1967	-4.53112	-2.16367		-0.719669	-4.73363	-9.32164	-5.83832	-5.24173	-5.6368	-5.25719	-5.46124	-5.50212	-3.66125	-5.82249	-3.93784	-4.84714	-3.95768	-5.91308	-4.68332	-5.1609	-4.22196	-3.59793	-3.8107	-4.45007	-3.50465	-4.86491	-4.34243	-4.17707	-4.51049	-4.2645	-4.0249	-3.44248	-3.84061	-3.97979
	-0.709429	-3.96283	-4.61102	-5.78276	-4.78594	-4.18492	-5.78002	-2.50301	-4.0468	-1.12042	-4.57726	-2.2362		-0.709429	-4.75505	-9.2486	-5.79345	-5.25718	-5.84161	-5.36315	-5.48529	-5.54993	-3.71293	-5.77334	-3.98845	-4.87668	-3.87084	-5.95848	-4.75917	-5.2834	-4.22594	-3.65615	-3.78059	-4.47042	-3.55499	-4.9837	-4.26576	-4.08572	-4.54166	-4.24308	-4.073	-3.46186	-3.80244	-3.98855
	-0.699189	-4.01094	-4.46732	-5.89926	-4.80299	-4.26678	-5.76573	-2.57749	-4.14111	-1.2338	-4.65634	-2.29856		-0.699189	-4.76948	-9.26382	-5.70533	-5.23859	-5.87711	-5.48877	-5.45487	-5.50456	-3.71904	-5.70977	-3.97768	-4.88243	-3.96082	-5.95464	-4.81837	-5.34491	-4.20472	-3.74279	-3.77004	-4.60257	-3.45728	-4.95475	-4.37237	-4.09769	-4.59389	-4.27617	-4.03449	-3.45149	-3.89777	-3.95827
	-0.688949	-4.0464	-4.50785	-5.8945	-4.83875	-4.25935	-5.84472	-2.43254	-4.18667	-1.39663	-4.64935	-2.45367		-0.688949	-4.7667	-9.24343	-5.6905	-5.27935	-5.78034	-5.49686	-5.36036	-5.53221	-3.65462	-5.63587	-3.9649	-4.90153	-3.97033	-5.97453	-4.88819	-5.3357	-4.18129	-3.77235	-3.7655	-4.57083	-3.45591	-4.98807	-4.41417	-4.12397	-4.62999	-4.36281	-4.00693	-3.40042	-3.87592	-3.97756
	-0.678709	-4.1153	-4.65662	-5.96245	-4.88921	-4.33593	-5.90555	-2.52087	-4.21419	-1.45259	-4.68943	-2.52618		-0.678709	-4.77037	-9.28087	-5.72583	-5.36532	-5.7218	-5.41874	-5.2575	-5.48742	-3.63729	-5.6288	-4.05594	-4.91698	-3.97513	-6.08007	-4.92085	-5.30631	-4.23709	-3.79178	-3.72721	-4.54367	-3.49519	-5.01892	-4.44101	-4.189	-4.65661	-4.31763	-3.93948	-3.40726	-3.82386	-3.97308
	-0.668469	-4.15745	-4.68011	-6.05463	-4.86629	-4.3513	-6.02228	-2.65489	-4.20874	-1.44787	-4.71184	-2.5765		-0.668469	-4.77501	-9.28891	-5.75024	-5.36798	-5.68351	-5.38701	-5.32665	-5.35513	-3.62147	-5.69408	-4.08659	-4.91294	-4.04323	-6.0369	-4.89238	-5.24527	-4.16473	-3.84366	-3.69012	-4.57606	-3.53109	-5.02056	-4.45327	-4.19409	-4.71829	-4.28099	-3.91753	-3.5774	-3.9141	-3.90102
	-0.658229	-4.22907	-4.61376	-6.09315	-4.91595	-4.46002	-6.16993	-2.71025	-4.37166	-1.57142	-4.69964	-2.68488		-0.658229	-4.79427	-9.39624	-5.86647	-5.37559	-5.69389	-5.49002	-5.33298	-5.41937	-3.73392	-5.64991	-4.1337	-4.90133	-4.0639	-6.03117	-4.90504	-5.15795	-4.22205	-3.86846	-3.62308	-4.63557	-3.55603	-5.047	-4.38443	-4.2216	-4.75882	-4.25045	-3.91096	-3.66763	-3.92401	-3.81231
	-0.647989	-4.29075	-4.60047	-6.07989	-4.95797	-4.5714	-6.30168	-2.78487	-4.41413	-1.65519	-4.69677	-2.84517		-0.647989	-4.81838	-9.47064	-5.82068	-5.36513	-5.70694	-5.61737	-5.29309	-5.42474	-3.85728	-5.643	-4.24201	-4.81604	-4.12137	-5.98314	-4.95857	-5.21938	-4.13324	-3.84709	-3.73353	-4.71705	-3.58213	-5.06585	-4.4542	-4.26028	-4.81459	-4.29672	-3.93513	-3.63195	-3.89533	-3.82652
	-0.637749	-4.34699	-4.68359	-6.20032	-4.9079	-4.64336	-6.32872	-2.92855	-4.46515	-1.69243	-4.66155	-2.95834		-0.637749	-4.8201	-9.3623	-5.80656	-5.37362	-5.77187	-5.61327	-5.36687	-5.47006	-3.85736	-5.63708	-4.21741	-4.92036	-4.02267	-5.98662	-4.93015	-5.24067	-4.05299	-3.93147	-3.77904	-4.67068	-3.56423	-5.06801	-4.44564	-4.28998	-4.90073	-4.25988	-3.89838	-3.60013	-3.91816	-3.82682
	-0.627509	-4.39881	-4.65269	-6.21586	-4.93254	-4.6423	-6.42428	-3.06239	-4.5715	-1.81427	-4.64301	-3.02922		-0.627509	-4.83944	-9.45599	-5.87251	-5.38082	-5.81702	-5.64777	-5.40414	-5.48503	-3.89122	-5.66584	-4.21888	-4.93974	-4.03041	-6.01184	-5.00375	-5.24205	-4.02693	-3.95623	-3.77556	-4.57549	-3.49683	-5.0634	-4.44938	-4.26725	-5.00525	-4.28355	-3.96429	-3.6748	-3.91795	-3.81987
	-0.617269	-4.45304	-4.5974	-6.25549	-4.96307	-4.64697	-6.55945	-3.10597	-4.66277	-1.9402	-4.70343	-3.09562		-0.617269	-4.86364	-9.45706	-5.92753	-5.49843	-5.85693	-5.62461	-5.35601	-5.50017	-3.8428	-5.76104	-4.36861	-4.91438	-4.00978	-5.95345	-5.0913	-5.21749	-4.05859	-3.8696	-3.72386	-4.63409	-3.5731	-5.10297	-4.45571	-4.32453	-5.07846	-4.25395	-4.0454	-3.78778	-3.88493	-3.87289
	-0.607029	-4.49972	-4.58677	-6.35624	-5.0095	-4.62875	-6.5408	-3.17206	-4.81302	-1.9517	-4.73234	-3.20603		-0.607029	-4.87954	-9.54549	-5.96182	-5.56287	-5.92006	-5.68645	-5.37021	-5.62327	-3.81293	-5.71803	-4.44991	-4.88982	-4.02168	-5.90563	-4.99233	-5.2649	-4.03235	-3.84764	-3.6699	-4.76741	-3.55184	-5.11409	-4.40545	-4.25927	-5.15751	-4.2463	-4.06318	-3.81359	-3.93395	-3.91872
	-0.596789	-4.52221	-4.58722	-6.32542	-5.07132	-4.74855	-6.54619	-3.13103	-4.92497	-1.91367	-4.71937	-3.25441		-0.596789	-4.89144	-9.51192	-5.99723	-5.59661	-5.8926	-5.72974	-5.43319	-5.57643	-3.75595	-5.74741	-4.47061	-4.87003	-4.02058	-5.95774	-4.94937	-5.22455	-4.04085	-3.92699	-3.7513	-4.84883	-3.56158	-5.03327	-4.49377	-4.25927	-5.15887	-4.34529	-3.99083	-3.84753	-3.95524	-3.90419
	-0.586549	-4.5772	-4.48722	-6.3679	-5.14565	-4.8995	-6.55411	-3.17054	-5.03012	-1.91973	-4.79467	-3.40252		-0.586549	-4.91067	-9.66136	-6.0398	-5.61901	-5.89185	-5.76548	-5.4592	-5.43052	-3.83683	-5.74113	-4.52845	-4.93039	-4.09201	-6.05893	-4.94217	-5.1759	-4.10089	-3.95205	-3.72395	-4.76773	-3.60193	-5.01876	-4.55838	-4.24155	-5.1245	-4.33807	-4.00254	-3.90609	-3.94715	-3.95282
	-0.576309	-4.61269	-4.47028	-6.30997	-5.10878	-4.90984	-6.6345	-3.23816	-5.11647	-1.96076	-4.79713	-3.58102		-0.576309	-4.90406	-9.63306	-6.00869	-5.6103	-5.9036	-5.81986	-5.45386	-5.39581	-3.86006	-5.68666	-4.57939	-5.00892	-4.05943	-6.02893	-4.98019	-5.2323	-4.09832	-3.90718	-3.62491	-4.76622	-3.61097	-4.96347	-4.48193	-4.2412	-5.141	-4.32174	-4.0461	-3.9225	-3.91797	-3.91325
	-0.566069	-4.6263	-4.41181	-6.27048	-5.04185	-4.86227	-6.70888	-3.25853	-5.18143	-2.04707	-4.77991	-3.70076		-0.566069	-4.90336	-9.65978	-5.94876	-5.58104	-5.89238	-5.83991	-5.4181	-5.40148	-3.95848	-5.67707	-4.54371	-4.97969	-3.96794	-6.05313	-5.08715	-5.24539	-4.066	-3.94604	-3.61084	-4.69966	-3.67596	-5.01008	-4.54413	-4.24244	-5.15527	-4.30951	-4.0815	-3.84874	-3.829	-3.92436
	-0.555829	-4.64544	-4.43754	-6.30455	-5.1369	-4.81989	-6.74872	-3.23697	-5.1485	-2.1748	-4.72607	-3.72046		-0.555829	-4.91593	-9.75154	-5.94094	-5.56845	-5.94296	-5.87934	-5.53423	-5.3966	-3.99619	-5.79426	-4.49344	-5.05327	-3.96451	-6.05794	-5.19482	-5.17365	-3.96842	-3.95171	-3.59855	-4.68709	-3.74174	-5.16347	-4.48745	-4.23412	-5.12349	-4.32639	-4.07212	-3.79313	-3.76304	-3.9091
	-0.545589	-4.70863	-4.47772	-6.40563	-5.31847	-4.87075	-6.89513	-3.22273	-5.17084	-2.22905	-4.71309	-3.78294		-0.545589	-4.93838	-9.75137	-5.98758	-5.50947	-6.03847	-5.82751	-5.67082	-5.37357	-4.03181	-5.64489	-4.55513	-5.05254	-4.0309	-6.09616	-5.14959	-5.13476	-4.00885	-4.00193	-3.60963	-4.67501	-3.83784	-5.2103	-4.54692	-4.1941	-5.14777	-4.3745	-4.10225	-3.88195	-3.80086	-3.96646
	-0.535349	-4.75197	-4.50534	-6.46754	-5.2304	-4.90775	-6.92058	-3.34602	-5.21033	-2.20332	-4.75838	-3.97009		-0.535349	-4.96524	-9.68889	-6.09666	-5.59325	-6.15431	-5.84453	-5.67741	-5.36542	-4.1688	-5.49129	-4.64171	-5.04807	-4.1121	-5.96335	-5.14691	-5.19189	-3.98837	-4.00052	-3.55742	-4.72443	-3.84673	-5.27744	-4.56237	-4.33477	-5.26271	-4.39048	-4.07847	-4.01386	-3.79494	-3.97496
	-0.525109	-4.78681	-4.44462	-6.43864	-5.2808	-5.01614	-6.98154	-3.43077	-5.23795	-2.21144	-4.76947	-4.05674		-0.525109	-4.95945	-9.65163	-6.063	-5.66683	-6.07443	-5.84628	-5.53181	-5.42507	-4.22229	-5.50391	-4.65908	-4.99227	-4.07335	-5.90304	-5.06083	-5.21748	-3.92849	-4.05175	-3.56754	-4.75588	-3.90085	-5.32523	-4.55917	-4.39653	-5.27423	-4.32389	-4.09402	-3.97239	-3.80096	-3.98184
	-0.514868	-4.76089	-4.49176	-6.39595	-5.29565	-4.93842	-6.96825	-3.49395	-5.2175	-2.34055	-4.71458	-3.75233		-0.514868	-4.95738	-9.66539	-6.09113	-5.70308	-6.06277	-5.83006	-5.44936	-5.34195	-4.20192	-5.61001	-4.71532	-4.89959	-3.95114	-5.84426	-4.98527	-5.25458	-3.91532	-4.10006	-3.63874	-4.78062	-3.90555	-5.31211	-4.6483	-4.34208	-5.30771	-4.28053	-4.0682	-3.96064	-3.84533	-4.05309
	-0.504628	-4.75859	-4.40368	-6.38957	-5.31311	-4.951	-6.96068	-3.54056	-5.14174	-2.39397	-4.7756	-3.71595		-0.504628	-4.97001	-9.69063	-6.18512	-5.82213	-6.01577	-5.88526	-5.54638	-5.36387	-4.23821	-5.7062	-4.68304	-4.88938	-3.86828	-5.78365	-4.9656	-5.14649	-3.91413	-4.19775	-3.70811	-4.73304	-3.91202	-5.25044	-4.55372	-4.4136	-5.34153	-4.30016	-4.05899	-3.93296	-3.94988	-4.07389
	-0.494388	-4.78766	-4.41945	-6.43532	-5.25324	-5.01549	-6.90422	-3.43403	-5.22329	-2.46367	-4.82241	-3.90548		-0.494388	-4.9887	-9.73374	-6.15358	-5.91301	-6.05059	-5.95615	-5.48943	-5.39624	-4.28061	-5.656	-4.75735	-4.88242	-3.92707	-5.78731	-5.03727	-5.1063	-4.08999	-4.11235	-3.77219	-4.64636	-3.94775	-5.17579	-4.53482	-4.42118	-5.42773	-4.36757	-4.06555	-3.93538	-3.98158	-4.06703
	-0.484148	-4.82969	-4.55048	-6.42258	-5.25074	-5.11725	-6.87533	-3.29169	-5.22218	-2.50647	-4.90215	-4.15799		-0.484148	-4.99354	-9.75162	-6.21661	-6.01408	-6.00195	-6.00718	-5.51858	-5.47253	-4.31828	-5.58593	-4.7993	-4.81645	-3.8974	-5.83388	-5.05704	-4.9565	-4.14814	-4.04867	-3.76435	-4.66024	-3.96041	-5.05476	-4.51641	-4.36057	-5.44046	-4.47981	-4.09627	-3.9034	-4.01313	-4.11861
	-0.473908	-4.90182	-4.60839	-6.37265	-5.37226	-5.20301	-6.9768	-3.28909	-5.26421	-2.63459	-4.87144	-4.42578		-0.473908	-4.99358	-9.75129	-6.27656	-5.94269	-5.85855	-6.14521	-5.5299	-5.56456	-4.27899	-5.51095	-4.77528	-4.80199	-3.89855	-5.84891	-5.07154	-4.93625	-4.13486	-4.06913	-3.74472	-4.71938	-3.96745	-5.07523	-4.52933	-4.28268	-5.4474	-4.52756	-4.1401	-3.87777	-3.9724	-4.13464
	-0.463668	-4.97894	-4.65064	-6.37454	-5.45171	-5.21828	-6.98481	-3.48328	-5.35973	-2.79631	-4.85234	-4.61776		-0.463668	-5.0278	-9.8333	-6.31448	-5.86249	-5.98399	-6.09643	-5.52456	-5.55424	-4.28907	-5.59417	-4.71694	-4.82758	-3.85364	-5.81061	-5.16428	-5.01493	-4.19614	-4.2557	-3.83522	-4.6821	-3.88068	-5.17713	-4.52192	-4.32548	-5.51605	-4.60875	-4.1877	-4.14557	-3.95963	-4.07345
	-0.453428	-5.01428	-4.72167	-6.42945	-5.46912	-5.29492	-6.9627	-3.69326	-5.26572	-2.79966	-4.85629	-4.64998		-0.453428	-5.03843	-9.8616	-6.31532	-5.75528	-6.00574	-6.0873	-5.5645	-5.48791	-4.35017	-5.62284	-4.75644	-4.83887	-3.85867	-5.799	-5.29565	-5.06596	-4.17597	-4.28953	-3.91972	-4.66355	-3.88327	-5.18496	-4.49099	-4.3909	-5.44669	-4.65947	-4.1098	-4.25651	-3.90494	-4.0728
	-0.443188	-5.04436	-4.72784	-6.44333	-5.44394	-5.29835	-6.95192	-3.80148	-5.27758	-2.89307	-4.87221	-4.73391		-0.443188	-5.05041	-9.80189	-6.38623	-5.7722	-6.05375	-6.03387	-5.52437	-5.41699	-4.48135	-5.71544	-4.79118	-4.75259	-3.89051	-5.92506	-5.41236	-5.18899	-4.14653	-4.24337	-3.85996	-4.57091	-4.0192	-5.32428	-4.48896	-4.27754	-5.37093	-4.61491	-4.09702	-4.30218	-3.94915	-4.05024
	-0.432948	-5.07713	-4.76279	-6.4637	-5.49767	-5.28827	-7.14931	-3.70958	-5.28977	-2.95587	-4.83105	-4.82332		-0.432948	-5.05507	-9.82124	-6.38512	-5.89516	-6.15058	-6.00043	-5.48307	-5.41724	-4.53159	-5.64586	-4.81397	-4.74633	-3.93614	-6.06607	-5.33813	-5.19335	-4.07183	-4.24994	-3.87015	-4.41444	-4.05414	-5.38196	-4.55489	-4.29634	-5.31058	-4.62304	-4.01113	-4.25889	-4.06651	-4.00901
	-0.422708	-5.13377	-4.88194	-6.46796	-5.53966	-5.18872	-7.21903	-3.81569	-5.43758	-3.09134	-4.89637	-4.79943		-0.422708	-5.07208	-9.96351	-6.47906	-5.97589	-6.2871	-6.02168	-5.50185	-5.36834	-4.58805	-5.84962	-4.7651	-4.65271	-3.9955	-5.94461	-5.18788	-5.1716	-4.07424	-4.28626	-3.8613	-4.39288	-4.00536	-5.31372	-4.62281	-4.32283	-5.27458	-4.61197	-4.06815	-4.30707	-4.18699	-4.00953
	-0.412468	-5.16851	-4.8459	-6.40694	-5.55121	-5.23534	-7.27106	-3.97137	-5.48649	-3.06897	-4.91001	-4.93784		-0.412468	-5.09139	-9.92943	-6.5335	-6.03642	-6.3518	-6.15197	-5.49702	-5.39266	-4.67601	-6.03389	-4.76805	-4.61144	-3.92427	-5.83245	-5.12389	-5.20587	-4.09446	-4.3048	-3.88421	-4.4163	-4.08992	-5.23367	-4.55207	-4.40706	-5.26379	-4.62689	-4.07886	-4.37278	-4.20128	-4.05557
	-0.402228	-5.16931	-4.80659	-6.35578	-5.47464	-5.22568	-7.27702	-4.02207	-5.54404	-3.14458	-4.82004	-5.02266		-0.402228	-5.0751	-9.83628	-6.42562	-6.01538	-6.36647	-6.19602	-5.48642	-5.35878	-4.67647	-5.90085	-4.68496	-4.57117	-3.96413	-5.76563	-5.00846	-5.25281	-4.08805	-4.32719	-3.85538	-4.48987	-4.15721	-5.25415	-4.50878	-4.4741	-5.27785	-4.69077	-4.05611	-4.25126	-4.17539	-4.0624
	-0.391988	-5.19361	-4.76593	-6.35306	-5.48877	-5.3453	-7.27732	-4.01129	-5.43142	-3.28547	-4.83859	-5.13892		-0.391988	-5.06665	-9.80276	-6.47145	-5.97989	-6.38106	-6.21653	-5.48285	-5.22799	-4.81418	-5.7615	-4.7434	-4.67123	-3.93356	-5.67847	-4.96266	-5.22367	-4.10859	-4.34009	-3.71332	-4.45704	-4.25505	-5.22503	-4.49911	-4.43267	-5.24072	-4.80227	-4.05414	-4.1959	-4.1269	-4.13079
	-0.381748	-5.25862	-4.86357	-6.48272	-5.37212	-5.43317	-7.25625	-4.15888	-5.46394	-3.39486	-4.97785	-5.18287		-0.381748	-5.08078	-9.80842	-6.49686	-6.02479	-6.44709	-6.19465	-5.52416	-5.24244	-4.83107	-5.6866	-4.84568	-4.64082	-4.12091	-5.68387	-4.91166	-5.19107	-4.1319	-4.39497	-3.71238	-4.495	-4.26929	-5.20444	-4.49936	-4.399	-5.26129	-4.86552	-3.97011	-4.21138	-4.15419	-4.12359
	-0.371508	-5.25058	-4.89725	-6.54747	-5.28841	-5.42157	-7.12166	-4.19436	-5.47008	-3.33433	-5.02379	-5.20684		-0.371508	-5.0828	-9.8706	-6.50348	-5.95584	-6.44443	-6.15844	-5.58312	-5.34766	-4.88471	-5.59003	-4.7958	-4.59579	-4.10008	-5.68612	-4.80169	-5.14748	-4.20772	-4.33791	-3.78062	-4.52598	-4.19442	-5.19082	-4.52195	-4.47974	-5.30924	-4.91719	-3.92987	-4.33833	-4.16772	-4.03433
	-0.361268	-5.23129	-4.84163	-6.56009	-5.39454	-5.38721	-7.01913	-4.13195	-5.49173	-3.33292	-4.92072	-5.23295		-0.361268	-5.08653	-9.97962	-6.4922	-5.95803	-6.41133	-6.13432	-5.61499	-5.35308	-4.82671	-5.45744	-4.71515	-4.54844	-4.15242	-5.8226	-4.85582	-5.06894	-4.23168	-4.29942	-3.74595	-4.52948	-4.19928	-5.16983	-4.50795	-4.54919	-5.4155	-4.96502	-3.98821	-4.33818	-4.18636	-3.99238
	-0.351028	-5.24965	-4.83873	-6.58337	-5.45786	-5.34981	-7.03437	-4.12636	-5.45229	-3.44931	-4.91462	-5.28977		-0.351028	-5.08479	-9.94916	-6.49646	-5.93321	-6.34188	-6.17975	-5.60965	-5.37817	-4.84046	-5.41324	-4.66563	-4.48729	-4.09446	-5.89698	-4.8604	-5.12632	-4.22703	-4.34863	-3.74455	-4.57157	-4.13546	-5.22605	-4.43327	-4.54987	-5.47917	-4.96107	-4.01923	-4.37797	-4.17193	-3.94009
	-0.340788	-5.27457	-4.83145	-6.49054	-5.47288	-5.39839	-7.07858	-4.23973	-5.38182	-3.58157	-4.90244	-5.3683		-0.340788	-5.09488	-9.93697	-6.45317	-5.97595	-6.29028	-6.18581	-5.57767	-5.38617	-4.91376	-5.54271	-4.63721	-4.5051	-4.06592	-5.86552	-4.98108	-5.15184	-4.25916	-4.43851	-3.71608	-4.64004	-4.1558	-5.22098	-4.39085	-4.57022	-5.49599	-4.9942	-3.9614	-4.46092	-4.07021	-3.90791
	-0.330548	-5.31009	-4.75437	-6.51846	-5.39643	-5.32139	-7.11848	-4.31147	-5.59124	-3.66791	-4.85389	-5.56731		-0.330548	-5.11605	-9.9648	-6.41519	-5.97925	-6.29697	-6.22697	-5.54523	-5.4162	-4.88383	-5.51355	-4.61881	-4.54111	-4.08738	-5.76865	-4.98459	-5.20506	-4.35681	-4.55529	-3.71148	-4.70601	-4.2701	-5.14428	-4.32969	-4.65611	-5.55794	-4.97615	-3.96218	-4.53076	-4.11084	-4.05025
	-0.320308	-5.329	-4.80492	-6.62419	-5.43551	-5.21856	-7.1156	-4.27118	-5.65061	-3.67213	-4.80655	-5.69072		-0.320308	-5.11007	-9.99526	-6.42544	-6.03823	-6.30595	-6.26181	-5.51297	-5.3928	-4.8581	-5.45525	-4.52404	-4.59768	-4.10302	-5.69648	-5.01208	-5.27185	-4.42991	-4.57308	-3.71999	-4.59094	-4.25565	-5.02634	-4.37297	-4.62634	-5.60014	-5.03763	-3.78136	-4.44509	-4.16854	-4.11298
	-0.310068	-5.33109	-4.84948	-6.61969	-5.51822	-5.14791	-7.17965	-4.12014	-5.60475	-3.78854	-4.78156	-5.70094		-0.310068	-5.12851	-9.96419	-6.45348	-6.04979	-6.34262	-6.33334	-5.45687	-5.40007	-5.0254	-5.52524	-4.51877	-4.59652	-4.1771	-5.8051	-5.10344	-5.32637	-4.32796	-4.58369	-3.70996	-4.49981	-4.21276	-4.98438	-4.34083	-4.6373	-5.49619	-5.05134	-3.81457	-4.53658	-4.24017	-4.21299
	-0.299828	-5.3312	-4.92638	-6.7425	-5.52471	-5.17182	-7.1858	-4.04326	-5.44899	-3.756	-4.856	-5.65652		-0.299828	-5.15142	-9.90044	-6.5637	-6.16566	-6.25703	-6.43665	-5.4272	-5.35946	-5.08597	-5.67708	-4.6909	-4.62228	-4.13445	-5.83354	-5.08563	-5.37467	-4.30464	-4.5758	-3.83583	-4.54654	-4.23173	-4.91143	-4.2979	-4.68726	-5.4063	-5.02477	-3.89854	-4.6298	-4.24052	-4.18551
	-0.289588	-5.36775	-4.80826	-6.72834	-5.57852	-5.24395	-7.20837	-4.06168	-5.54413	-3.85971	-4.96128	-5.68321		-0.289588	-5.16327	-9.92677	-6.66565	-6.2853	-6.34295	-6.46872	-5.43668	-5.3595	-5.17444	-5.62288	-4.71547	-4.62027	-4.11707	-5.76341	-5.11958	-5.37835	-4.35337	-4.6309	-3.80279	-4.50451	-4.2537	-4.92507	-4.27458	-4.64253	-5.51392	-5.0231	-3.8118	-4.60126	-4.25118	-4.14904
	-0.279348	-5.40719	-4.74271	-6.73499	-5.55285	-5.26591	-7.15034	-4.14794	-5.58795	-4.00522	-5.05159	-5.83237		-0.279348	-5.14822	-9.89668	-6.6177	-6.28253	-6.33051	-6.38784	-5.43983	-5.36258	-5.17718	-5.54938	-4.72905	-4.54016	-4.09116	-5.81051	-5.04626	-5.27811	-4.38361	-4.6083	-3.75793	-4.47142	-4.29243	-4.91303	-4.26795	-4.69031	-5.55441	-5.07613	-3.70795	-4.65037	-4.24049	-4.14463
[truncated: 320 more rows]
[truncated: 66 more columns]

## Sheet: panel E
	Tone sustained
[truncated: 1,077 more rows]
[truncated: 151 more columns]
