# Supplementary material for: Glycinergic axonal inhibition subserves acute spatial sensitivity to sudden increases in sound intensity
Source: eLife journal article supplement (doi:10.7554/elife.62183), 2021-06-14
Supplement: supp [file elife-62183-supp-v1.zip › elife_poa_e62183_Figure_1_figure_supplement_5_source_data_1.xlsx]

## Sheet: panel A
	Ipsilateral stimulus																						Contralateral stimulus																							Av Vm rel
	ITD (ms):	0.901122	0.798722	0.706562	0.604162	0.501761	0.399361	0.296961	0.204801	0.0921602	0	-0.0921602	-0.204801	-0.296961	-0.399361	-0.501761	-0.604162	-0.706562	-0.798722	-0.901122	-1.00352		ITD (ms):	0.901122	0.798722	0.706562	0.604162	0.501761	0.399361	0.296961	0.204801	0.0921602	0	-0.0921602	-0.204801	-0.296961	-0.399361	-0.501761	-0.604162	-0.706562	-0.798722	-0.901122	-1.00352			ITD (ms):	0.901122	0.798722	0.706562
	Time (ms)	Stimulus waveform (A.U.)	Stimulus waveform (A.U.)	Stimulus waveform (A.U.)	Stimulus waveform (A.U.)	Stimulus waveform (A.U.)	Stimulus waveform (A.U.)	Stimulus waveform (A.U.)	Stimulus waveform (A.U.)	Stimulus waveform (A.U.)	Stimulus waveform (A.U.)	Stimulus waveform (A.U.)	Stimulus waveform (A.U.)	Stimulus waveform (A.U.)	Stimulus waveform (A.U.)	Stimulus waveform (A.U.)	Stimulus waveform (A.U.)	Stimulus waveform (A.U.)	Stimulus waveform (A.U.)	Stimulus waveform (A.U.)	Stimulus waveform (A.U.)		Time (ms)	Stimulus waveform (A.U.)	Stimulus waveform (A.U.)	Stimulus waveform (A.U.)	Stimulus waveform (A.U.)	Stimulus waveform (A.U.)	Stimulus waveform (A.U.)	Stimulus waveform (A.U.)	Stimulus waveform (A.U.)	Stimulus waveform (A.U.)	Stimulus waveform (A.U.)	Stimulus waveform (A.U.)	Stimulus waveform (A.U.)	Stimulus waveform (A.U.)	Stimulus waveform (A.U.)	Stimulus waveform (A.U.)	Stimulus waveform (A.U.)	Stimulus waveform (A.U.)	Stimulus waveform (A.U.)	Stimulus waveform (A.U.)	Stimulus waveform (A.U.)			Time (ms)	Av Vm rel	Av Vm rel	Av Vm rel
	-5	0.000240271	0.000272604	0.000267373	0.000249235	0.000260967	0.000283066	0.000262887	0.000272142	0.000246726	0.000266875	0.00023657	0.00029502	0.000256295	0.00029347	0.000249387	0.000277566	0.000249703	0.000264034	0.000265515	0.000244709		-5	5.37083e-05	2.5016e-05	5.34439e-05	-3.49961e-06	3.73891e-08	2.09239e-05	1.52018e-05	6.25718e-05	3.24311e-05	5.16509e-05	4.63054e-05	3.60649e-05	3.02805e-05	2.91058e-05	4.49496e-05	4.26028e-05	3.04674e-05	4.92118e-05	9.38131e-05	3.59331e-05			0.00737282	-0.470271	0.167824	-1.08898
	-4.98976	0.000249203	0.000278374	0.000240871	0.000248112	0.000277081	0.000304603	0.0002451	0.000236044	0.000275508	0.000243425	0.000241825	0.000273662	0.000241216	0.00025905	0.000284081	0.000304536	0.000280556	0.000299453	0.000286649	0.000244856		-4.98976	8.38524e-05	3.19279e-05	6.38866e-05	9.3744e-07	4.6564e-06	3.04169e-05	3.05206e-05	5.3281e-05	3.76283e-05	3.1294e-05	6.44207e-05	3.0486e-05	3.12201e-05	8.05167e-05	6.20413e-05	3.08444e-05	6.46984e-05	3.14859e-05	7.60194e-05	2.70359e-05			0.0380929	-0.723323	0.311169	-0.593231
	-4.97952	0.00024479	0.000256655	0.000257733	0.000284577	0.000283017	0.000264199	0.000246227	0.000247763	0.000270981	0.000276065	0.000246063	0.000242699	0.000236853	0.000224071	0.000322306	0.000321485	0.000310654	0.000302038	0.000281275	0.000258052		-4.97952	9.44279e-05	1.44821e-05	6.83359e-05	1.36572e-06	5.44543e-05	2.23686e-05	3.06804e-05	1.51338e-05	2.98401e-05	3.77014e-05	3.63871e-05	3.11773e-05	4.25151e-05	9.50506e-05	5.48335e-05	2.74698e-05	5.928e-05	3.83757e-05	3.90418e-05	6.78846e-06			0.068813	-1.36203	-0.0573823	-0.729703
	-4.96928	0.000248725	0.00024392	0.000277631	0.000306344	0.000270092	0.000207845	0.000248265	0.000290539	0.000230758	0.000305178	0.00024373	0.000211522	0.000248505	0.00021156	0.000320645	0.000335841	0.000298022	0.000279154	0.000255771	0.000280115		-4.96928	7.08207e-05	-1.7013e-06	5.35163e-05	-5.83889e-07	9.71194e-05	3.45728e-05	3.30117e-05	-1.01517e-06	3.06307e-05	6.08493e-05	1.27219e-06	3.01256e-05	6.93609e-05	7.19269e-05	3.68132e-05	3.07457e-05	2.26455e-05	5.83707e-05	2.16808e-05	1.72607e-06			0.0995331	-1.62235	0.247764	-0.395341
	-4.95904	0.000270704	0.000252995	0.000260902	0.000275156	0.000248953	0.000204984	0.000236962	0.00031157	0.000214681	0.000277744	0.000251251	0.000208126	0.000267152	0.000222693	0.000275986	0.000332659	0.000245103	0.000275434	0.000242844	0.000286215		-4.95904	3.53989e-05	2.66341e-05	1.88212e-05	-1.11676e-06	7.68272e-05	7.42485e-05	2.27146e-05	1.84669e-05	2.90632e-05	6.05917e-05	1.84364e-05	2.3126e-05	9.16841e-05	4.40387e-05	2.58047e-05	4.38456e-05	-2.47266e-06	5.76544e-05	2.89115e-05	3.0383e-05			0.130253	-1.90351	-0.00506247	-0.432322
	-4.9488	0.000285562	0.000272359	0.000238569	0.000231516	0.000245725	0.000254687	0.00023471	0.000293846	0.000247295	0.000243855	0.00027117	0.000251671	0.000274413	0.000239885	0.00022613	0.000302854	0.000208878	0.000299586	0.000256048	0.000265956		-4.9488	1.88122e-05	6.01595e-05	-5.49605e-06	1.51028e-06	1.32102e-05	9.09961e-05	2.49966e-06	3.45028e-05	1.14196e-05	2.98329e-05	5.76704e-05	3.34944e-05	8.7586e-05	3.13916e-05	2.71506e-05	6.22435e-05	3.97819e-06	3.56746e-05	2.68206e-05	7.48919e-05			0.160973	-2.60448	-0.184956	0.0206196
	-4.93856	0.000276735	0.00028308	0.000253634	0.000229208	0.000262952	0.000298838	0.000264791	0.000260091	0.000278166	0.000255426	0.000282177	0.000302441	0.000258613	0.000252531	0.000203178	0.000272744	0.000221661	0.000309648	0.000273502	0.000243273		-4.93856	2.85955e-05	4.75221e-05	8.86202e-06	1.42976e-05	-1.85726e-05	5.91407e-05	8.09521e-06	3.086e-05	-7.12398e-07	9.8697e-07	5.50706e-05	5.91088e-05	6.80336e-05	3.40632e-05	3.90271e-05	6.93343e-05	2.31779e-05	2.22909e-05	3.95465e-06	9.76616e-05			0.191693	-2.54029	-0.388392	0.0732276
	-4.92832	0.000262983	0.000275989	0.000287501	0.000252021	0.00027743	0.000301977	0.00030078	0.00023226	0.000264999	0.000274843	0.000276073	0.000299478	0.000238486	0.000269033	0.000207971	0.000276503	0.000251359	0.000282285	0.00026764	0.000251399		-4.92832	4.06013e-05	3.00202e-05	4.66065e-05	4.46077e-05	1.71762e-05	2.62733e-05	4.62453e-05	3.54693e-05	1.33906e-05	1.01005e-06	3.14574e-05	5.76448e-05	6.08463e-05	5.39019e-05	5.66227e-05	5.98801e-05	3.14345e-05	2.85385e-05	1.17351e-06	8.23973e-05			0.222413	-2.60973	0.172441	0.140106
	-4.91808	0.000272861	0.000257134	0.00028974	0.000240281	0.000276851	0.000271115	0.000295542	0.00021599	0.000238154	0.000257539	0.000269134	0.00024563	0.000249984	0.000292003	0.000228645	0.000291044	0.000254711	0.000247361	0.00024663	0.000286948		-4.91808	3.19628e-05	5.98113e-05	6.49981e-05	8.01988e-05	7.43996e-05	3.76202e-05	7.60202e-05	5.53838e-05	3.56324e-05	2.81582e-05	4.86132e-05	2.08274e-05	6.44471e-05	8.329e-05	6.31122e-05	5.27325e-05	2.92722e-05	3.64627e-05	5.07563e-05	4.75458e-05			0.253133	-2.61032	0.326689	0.197397
	-4.90784	0.000298683	0.00024438	0.000257668	0.00018926	0.000274088	0.000235443	0.000255484	0.000215659	0.000236022	0.000244861	0.000274086	0.000210132	0.000293823	0.000305303	0.000262959	0.000268063	0.000238119	0.000242401	0.000242092	0.000310666		-4.90784	1.77943e-05	9.17144e-05	5.43972e-05	9.38631e-05	9.23189e-05	6.87496e-05	6.9392e-05	5.98195e-05	3.8338e-05	6.53732e-05	8.9567e-05	-1.2076e-06	5.48167e-05	9.38197e-05	4.0914e-05	6.38302e-05	3.38369e-05	3.22217e-05	0.000108108	2.32195e-05			0.283854	-2.61715	0.0764343	-0.0181777
	-4.8976	0.000305551	0.000242053	0.000238693	0.000166149	0.000275296	0.000226571	0.00023634	0.000233698	0.000246951	0.000276471	0.000271176	0.00022468	0.000316654	0.000295204	0.000299908	0.000222251	0.000234468	0.000254879	0.000270247	0.000294657		-4.8976	2.98412e-05	6.79278e-05	5.12962e-05	7.61179e-05	7.2397e-05	7.39323e-05	4.43336e-05	3.96985e-05	2.68802e-05	9.07333e-05	8.47089e-05	1.62088e-05	3.48026e-05	7.59125e-05	9.38614e-06	7.44398e-05	5.1241e-05	1.84923e-05	9.78244e-05	2.28965e-05			0.314574	-2.70189	-0.305026	0.147394
	-4.88736	0.000277018	0.000244182	0.000256825	0.0002149	0.000272573	0.000257364	0.000263228	0.000253879	0.00024687	0.000306777	0.000245555	0.000248256	0.000284714	0.000276707	0.000309428	0.000216922	0.000252528	0.000246661	0.000310956	0.000257078		-4.88736	5.899e-05	3.04651e-05	7.7408e-05	4.78675e-05	5.80395e-05	5.35738e-05	3.06216e-05	2.4493e-05	2.47635e-05	9.01018e-05	3.312e-05	3.16221e-05	3.38299e-05	6.13358e-05	1.92618e-05	5.43415e-05	6.39179e-05	1.59519e-06	2.96096e-05	3.92946e-05			0.345294	-2.90106	-0.0184643	0.0369062
	-4.87712	0.000243767	0.00025313	0.00027638	0.000286775	0.00026988	0.00029711	0.000293913	0.000251543	0.000243217	0.000281977	0.000231331	0.000247022	0.000245049	0.000269935	0.000279184	0.000244333	0.000270665	0.000216735	0.000335174	0.000238774		-4.87712	6.0905e-05	3.9545e-05	9.75341e-05	3.2438e-05	6.12954e-05	3.55749e-05	3.72843e-05	2.80504e-05	3.45076e-05	7.27648e-05	3.83096e-06	1.38865e-05	5.40421e-05	6.72721e-05	7.80716e-05	1.35354e-05	4.96687e-05	-9.95782e-06	-9.55067e-07	5.69033e-05			0.376014	-2.78746	0.102643	-0.290156
	-4.86688	0.000243699	0.000276054	0.000263153	0.000308373	0.000282475	0.000300448	0.00028307	0.000231527	0.000244601	0.000236295	0.000274591	0.000245811	0.000257589	0.000274185	0.000246677	0.000237252	0.000274675	0.000212409	0.000329561	0.000257779		-4.86688	2.60011e-05	6.15448e-05	6.99656e-05	3.0579e-05	5.67404e-05	2.91268e-05	5.64124e-05	3.1877e-05	3.66879e-05	5.90492e-05	3.05804e-05	-8.29145e-07	6.10706e-05	6.34687e-05	0.000121461	2.53298e-06	1.46238e-05	-1.20864e-06	4.55052e-05	6.04857e-05			0.406734	-2.85813	0.229512	-0.274117
	-4.85664	0.000277126	0.000290592	0.000243543	0.000283984	0.000301735	0.000265085	0.000246841	0.000233429	0.000241712	0.000227708	0.000337514	0.00026437	0.000297296	0.000275384	0.000249032	0.000204223	0.000273306	0.000255501	0.000305567	0.000293576		-4.85664	-5.54845e-07	3.88327e-05	1.52169e-05	3.0976e-05	3.78208e-05	2.8206e-05	7.18422e-05	2.97158e-05	2.48372e-05	4.73047e-05	7.47478e-05	2.89587e-05	4.06182e-05	3.69029e-05	0.00010219	4.72623e-05	-5.15382e-06	3.06763e-05	9.17038e-05	4.25722e-05			0.437454	-2.60524	0.358713	0.121708
	-4.8464	0.000306183	0.000271207	0.000254733	0.000269504	0.000301425	0.000234537	0.000239696	0.000272956	0.000238079	0.000250302	0.000333546	0.000275062	0.00030055	0.000274596	0.000271984	0.000229903	0.000276494	0.000305004	0.000282559	0.000309688		-4.8464	1.14152e-05	-3.33878e-06	-7.76623e-06	3.00396e-05	2.80636e-05	3.45665e-05	6.57411e-05	3.76726e-05	2.10403e-05	2.33508e-05	9.19103e-05	7.64794e-05	2.58568e-05	2.96362e-05	6.3971e-05	0.000106767	1.35399e-05	6.11621e-05	7.09513e-05	1.79436e-05			0.468174	-2.60198	0.341085	-0.0528809
	-4.83616	0.000303004	0.000240584	0.000274588	0.000274946	0.000282121	0.000235751	0.000274087	0.000305584	0.000255443	0.000266499	0.00026726	0.000256773	0.000277325	0.000276638	0.000279841	0.000308563	0.000277311	0.000308112	0.000274616	0.000289286		-4.83616	3.17177e-05	-1.22752e-05	1.76142e-05	3.02082e-05	3.14861e-05	5.12786e-05	3.50211e-05	5.65505e-05	4.5191e-05	-6.24789e-08	7.96756e-05	8.19801e-05	4.67629e-05	5.62471e-05	6.72629e-05	0.000117413	4.95649e-05	5.9966e-05	2.98606e-05	1.91185e-05			0.498894	-2.51591	0.31692	0.035514
	-4.82592	0.000271709	0.000248061	0.000262666	0.000265559	0.000269667	0.000250098	0.00030427	0.000281762	0.000290715	0.000279982	0.000246094	0.000240355	0.00028261	0.000274804	0.000274978	0.000332191	0.000270026	0.000273056	0.00027629	0.000252652		-4.82592	2.15795e-05	1.83413e-06	5.08721e-05	3.13369e-05	2.37866e-05	6.77412e-05	2.90513e-06	6.6511e-05	8.06405e-05	4.89314e-06	5.95181e-05	4.32113e-05	7.89466e-05	6.16333e-05	9.0981e-05	7.38557e-05	6.70903e-05	2.91639e-05	3.4653e-05	5.55681e-05			0.529614	-2.56984	0.526635	0.110031
	-4.81568	0.000240181	0.000278697	0.000243068	0.000245385	0.000271949	0.000250295	0.000288712	0.000224608	0.000313411	0.000311779	0.000301598	0.000257273	0.000304923	0.000259242	0.000274891	0.000274657	0.000269107	0.000244872	0.000273988	0.000239098		-4.81568	-2.85664e-06	3.97643e-06	6.09302e-05	3.11997e-05	3.78234e-06	6.80046e-05	-1.23216e-06	6.26329e-05	9.67891e-05	2.69663e-05	4.34439e-05	2.11244e-05	7.41843e-05	2.07408e-05	7.71929e-05	3.40536e-05	6.34739e-05	1.08638e-06	6.28941e-05	8.94897e-05			0.560334	-2.37281	0.597043	0.555213
	-4.80544	0.000231539	0.000267103	0.000262377	0.000256068	0.000279426	0.000234768	0.000247734	0.000202671	0.000310683	0.000343834	0.00033516	0.000286103	0.000288621	0.000243891	0.000274925	0.000239605	0.000286402	0.000244972	0.000259276	0.000263622		-4.80544	2.05089e-06	-3.68e-07	6.53328e-05	2.87285e-05	5.66634e-06	5.14588e-05	2.68417e-05	5.98189e-05	9.35369e-05	2.65499e-05	2.83226e-05	4.63877e-05	3.05594e-05	4.09352e-07	3.28284e-05	3.47403e-05	6.07194e-05	1.12356e-06	6.6234e-05	8.03636e-05			0.591054	-2.30979	0.188347	0.508665
	-4.7952	0.000248889	0.000208903	0.000300131	0.000296199	0.000296276	0.000217663	0.000228707	0.000235266	0.000296794	0.000333809	0.000287962	0.000285902	0.000249427	0.000249443	0.000268057	0.000278177	0.000304096	0.000259419	0.000242364	0.000298762		-4.7952	3.89318e-05	1.75444e-06	8.60592e-05	2.85499e-05	4.41978e-05	3.44268e-05	5.89869e-05	6.15976e-05	9.19599e-05	4.59772e-06	1.04138e-05	6.90845e-05	-2.41855e-07	4.58733e-05	1.17887e-05	4.13457e-05	6.26418e-05	2.04191e-05	6.18024e-05	4.11415e-05			0.621774	-2.00406	0.499731	0.134834
	-4.78496	0.000270331	0.000183873	0.00030228	0.000311811	0.000319477	0.000213394	0.000242986	0.000265825	0.00028105	0.000282362	0.000239646	0.000262102	0.000252981	0.000277035	0.000274516	0.000314327	0.000298228	0.000276994	0.000237385	0.000306284		-4.78496	6.53827e-05	-2.09179e-06	9.94982e-05	4.4399e-05	8.70435e-05	2.9115e-05	6.22232e-05	5.38703e-05	9.32777e-05	5.21251e-06	-8.51791e-07	4.10391e-05	1.67313e-05	9.35099e-05	3.03797e-05	1.61966e-05	5.40185e-05	3.06366e-05	7.97794e-05	1.76054e-05			0.652494	-2.09572	0.588566	0.382646
	-4.77472	0.000272839	0.000230351	0.000278198	0.000283156	0.000315442	0.000231765	0.000255401	0.000249707	0.000266004	0.000242842	0.00025464	0.000260806	0.000296166	0.000301426	0.000298148	0.000293072	0.00027892	0.000294197	0.000245784	0.000282594		-4.77472	5.62015e-05	-9.50883e-06	7.1166e-05	8.24452e-05	9.67689e-05	3.04228e-05	3.24463e-05	3.38591e-05	8.79772e-05	4.08245e-05	9.1056e-06	1.76223e-06	5.43236e-05	7.46202e-05	6.33573e-05	-7.15543e-06	3.55659e-05	1.75877e-05	9.12037e-05	2.57488e-05			0.683215	-2.07052	0.751524	0.341439
	-4.76448	0.000255965	0.000286881	0.00027061	0.000254856	0.000272654	0.000263074	0.000244328	0.000219563	0.000267782	0.00025635	0.000274967	0.000299316	0.000311399	0.000304207	0.000304645	0.000263981	0.000271437	0.000306698	0.000250168	0.000254353		-4.76448	3.49068e-05	9.00209e-06	2.51149e-05	0.000114462	7.1801e-05	3.03397e-05	1.90287e-07	1.9511e-05	8.79729e-05	7.10593e-05	3.79188e-05	1.46901e-05	6.91158e-05	2.57427e-05	9.28606e-05	1.86374e-05	2.55786e-05	-3.13302e-06	6.23879e-05	4.49111e-05			0.713935	-2.09165	0.63143	0.493129
	-4.75424	0.000240784	0.000290966	0.000274998	0.000268556	0.000243284	0.000277319	0.00023035	0.000238334	0.000292125	0.000295453	0.000242135	0.000334837	0.000282277	0.000289094	0.000272632	0.00026924	0.000274575	0.000309659	0.000241359	0.000243767		-4.75424	3.18226e-05	4.8472e-05	2.4963e-05	9.97204e-05	3.7643e-05	3.05904e-05	-3.76533e-07	2.81166e-05	0.000101472	6.87909e-05	6.07968e-05	5.53082e-05	6.25702e-05	1.47954e-05	0.000107014	5.88987e-05	2.90242e-05	-8.16522e-06	2.43677e-05	5.90455e-05			0.744655	-1.97393	0.821227	0.321933
	-4.744	0.000239844	0.000267228	0.000267071	0.000302206	0.000260718	0.000261408	0.000245264	0.00030065	0.000307764	0.000301176	0.000209457	0.000318392	0.000253019	0.000271811	0.000243161	0.000273395	0.000271285	0.000301992	0.000234283	0.000251158		-4.744	3.67564e-05	5.8906e-05	7.30022e-05	5.05011e-05	1.92455e-05	2.76083e-05	3.20927e-05	5.83514e-05	9.97679e-05	5.57627e-05	5.76995e-05	5.11207e-05	6.08028e-05	3.37097e-05	8.90394e-05	4.70567e-05	3.28176e-05	2.86237e-06	2.01776e-05	6.69419e-05			0.775375	-1.80631	0.840922	0.257204
	-4.73376	0.000245877	0.00026568	0.000271846	0.000307695	0.000276895	0.000244175	0.000281988	0.000335829	0.000285075	0.000263376	0.000237943	0.000262246	0.000244668	0.000256186	0.000262026	0.000251761	0.000271389	0.000275188	0.000251131	0.000270788		-4.73376	2.36674e-05	2.37568e-05	9.39133e-05	2.92937e-05	2.65195e-05	8.5048e-06	6.30999e-05	9.04657e-05	6.36483e-05	5.70786e-05	3.82855e-05	9.17384e-06	6.22609e-05	3.79933e-05	4.92249e-05	5.39946e-06	3.11404e-05	7.63329e-06	3.28707e-05	6.34029e-05			0.806095	-1.75897	0.786009	0.0124484
	-4.72352	0.000246365	0.000277838	0.000310143	0.000276183	0.000252382	0.000253411	0.0003059	0.000302115	0.000249136	0.000229477	0.00028793	0.000224293	0.000240412	0.000240956	0.000311029	0.000245187	0.000295438	0.000231767	0.000285621	0.000293247		-4.72352	2.37507e-06	-7.76198e-06	4.96123e-05	5.33623e-05	4.77992e-05	-1.73342e-05	5.94134e-05	9.5843e-05	3.19551e-05	6.53664e-05	3.08797e-05	3.33724e-06	4.86212e-05	2.89577e-05	3.05213e-05	1.40541e-05	3.0118e-05	-4.14331e-06	2.11576e-05	4.54058e-05			0.836815	-1.63831	0.768553	0.192472
	-4.71328	0.000242407	0.000263603	0.000335987	0.000245576	0.000240387	0.000272684	0.000296938	0.000244908	0.000244773	0.000233886	0.000291893	0.000234655	0.000242718	0.00023491	0.000328352	0.000284525	0.000331029	0.000204686	0.000310274	0.000305064		-4.71328	4.58568e-06	7.32597e-06	1.3096e-06	6.29221e-05	6.07309e-05	-1.00649e-05	2.53324e-05	6.2088e-05	4.20929e-05	6.4753e-05	4.68896e-05	4.7313e-05	3.14111e-05	2.86919e-05	4.73789e-05	7.34458e-05	3.07231e-05	-1.12627e-05	-8.96982e-06	3.0967e-05			0.867535	-1.53009	0.799493	-0.306796
	-4.70304	0.000241994	0.000230234	0.000301237	0.000239915	0.000281464	0.000268881	0.000271149	0.000225395	0.000269736	0.000259252	0.000264558	0.000265029	0.000260409	0.00024967	0.000297781	0.000333134	0.000339657	0.000224698	0.000311471	0.000296621		-4.70304	2.5352e-05	4.77241e-05	6.99227e-06	2.50979e-05	5.97592e-05	4.2431e-05	-1.8166e-06	1.59039e-05	6.13064e-05	5.40365e-05	6.78247e-05	7.90628e-05	3.7667e-05	3.01837e-05	6.16669e-05	0.000102654	2.93235e-05	1.00635e-05	-1.61555e-05	3.9005e-05			0.898255	-1.57689	1.21737	-0.0902789
	-4.6928	0.00024543	0.000226548	0.000244747	0.000244123	0.000307458	0.00024771	0.000250394	0.000244885	0.000283271	0.000274242	0.000261521	0.000276334	0.000274454	0.000270927	0.000268043	0.000342452	0.000310826	0.000264614	0.000300561	0.000276193		-4.6928	2.7789e-05	6.5856e-05	3.05123e-05	-2.93843e-07	6.05502e-05	8.89235e-05	6.19279e-06	1.33166e-07	4.64168e-05	3.73411e-05	6.99836e-05	6.77562e-05	6.00669e-05	2.59802e-05	4.61994e-05	7.39807e-05	3.00718e-05	4.71591e-05	1.37654e-05	6.00283e-05			0.928975	-1.73296	1.42819	-0.446647
	-4.68256	0.000245179	0.000266403	0.000228245	0.000240731	0.000252335	0.000237791	0.000244046	0.000264607	0.000275892	0.000268989	0.00028448	0.000262489	0.000270098	0.000271667	0.000280578	0.000313061	0.000270267	0.000271663	0.000286021	0.000255068		-4.68256	7.50929e-06	5.20709e-05	1.84776e-05	3.88432e-05	6.7306e-05	7.83764e-05	3.56372e-05	1.72133e-05	2.92551e-05	2.12384e-05	5.25612e-05	4.45011e-05	6.16263e-05	3.69498e-05	2.8798e-05	4.55718e-05	3.47058e-05	6.25641e-05	5.0846e-05	6.88318e-05			0.959695	-1.98021	1.25899	-0.416975
	-4.67232	0.000244592	0.000302606	0.000244644	0.000244257	0.000185176	0.000243231	0.000254305	0.000275489	0.000276381	0.00025058	0.000287606	0.000245778	0.000274261	0.000252309	0.000306488	0.00028042	0.000245377	0.000248777	0.000265119	0.000244166		-4.67232	-1.52491e-07	3.41317e-05	-3.0404e-08	9.21661e-05	6.24144e-05	3.56584e-05	4.65509e-05	3.09487e-05	6.20527e-05	2.35096e-05	3.47078e-05	3.23501e-05	3.15244e-05	7.08864e-05	4.13477e-05	5.51826e-05	3.17031e-05	4.43961e-05	6.14258e-05	6.1486e-05			0.990415	-2.03619	1.05288	-0.409961
	-4.66208	0.000260184	0.00029725	0.00024887	0.000262363	0.000202409	0.000244326	0.000281485	0.000291023	0.000301547	0.000233711	0.000259219	0.000246612	0.000297215	0.000243925	0.000299228	0.000267862	0.000238596	0.000250212	0.000245484	0.000258791		-4.66208	1.88822e-05	3.00283e-05	2.49289e-05	8.35024e-05	4.13796e-05	2.57195e-05	2.35146e-05	2.82819e-05	0.000118174	5.37541e-05	3.01893e-05	2.52506e-05	4.57149e-07	9.92939e-05	6.72341e-05	7.19447e-05	1.43841e-05	2.56447e-05	4.39952e-05	5.59229e-05			1.02114	-1.51274	1.0436	-0.412588
	-4.65184	0.000292193	0.000276868	0.00024417	0.000274822	0.000273173	0.000243336	0.000305871	0.000306094	0.000330123	0.000238355	0.000239925	0.000269614	0.000304942	0.000260127	0.000274181	0.00027273	0.000243708	0.000288081	0.00025046	0.000306517		-4.65184	4.18347e-05	3.08534e-05	6.29468e-05	2.75319e-05	3.05519e-05	5.75408e-05	-2.44692e-06	3.18768e-05	0.00012991	8.76601e-05	3.22681e-05	2.8219e-05	4.05305e-07	0.00010025	7.13672e-05	6.5421e-05	1.66836e-07	4.0787e-05	2.05418e-05	6.14617e-05			1.05186	-1.34473	0.723659	-0.567442
	-4.6416	0.000309396	0.000277965	0.00025693	0.000271717	0.000299126	0.000262547	0.000299466	0.000298028	0.000336344	0.000262301	0.000255543	0.000297765	0.000283242	0.000283199	0.000281198	0.000278276	0.000256908	0.000307924	0.000285358	0.000348315		-4.6416	5.59782e-05	3.18278e-05	4.85841e-05	-6.2414e-06	4.51059e-05	7.21622e-05	6.4319e-06	4.11376e-05	9.45173e-05	8.56043e-05	2.50402e-05	4.88236e-05	3.00812e-05	8.50344e-05	5.61305e-05	4.68036e-05	8.37473e-06	7.94745e-05	5.03129e-06	6.62168e-05			1.08258	-1.65246	0.860702	-0.35561
	-4.63136	0.000288485	0.000280934	0.000275995	0.000275715	0.000274026	0.000302704	0.000264163	0.000269201	0.000313173	0.000275396	0.000275365	0.000306269	0.000275304	0.000298593	0.000306794	0.000275708	0.000274707	0.000272375	0.000318887	0.000332354		-4.63136	6.82265e-05	4.88929e-05	-6.708e-06	1.88377e-06	6.13983e-05	3.41349e-05	4.28894e-05	2.57872e-05	6.45175e-05	4.24422e-05	6.73883e-06	6.19268e-05	6.30537e-05	6.89098e-05	5.24671e-05	3.26294e-05	3.06822e-05	9.8362e-05	-3.74469e-06	6.06519e-05			1.1133	-1.31219	0.96248	-0.971689
	-4.62112	0.000252762	0.000256476	0.000267881	0.000285366	0.000260919	0.000325175	0.000239912	0.000245487	0.000275314	0.000266228	0.000264395	0.000283653	0.000297414	0.000309442	0.000294298	0.000270604	0.000282386	0.000218262	0.000317037	0.000272011		-4.62112	6.86049e-05	8.29427e-05	-2.95324e-05	1.98601e-05	5.30321e-05	-1.09457e-05	6.39821e-05	-3.73677e-06	6.1204e-05	-1.278e-06	-2.56816e-06	3.97441e-05	7.38616e-05	5.63427e-05	6.74267e-05	2.45632e-05	4.12062e-05	7.60668e-05	-4.25589e-06	5.51527e-05			1.14402	-1.49987	0.849902	-1.12567
	-4.61088	0.00023834	0.000238993	0.000239227	0.000270293	0.000275753	0.000305786	0.000253185	0.000246271	0.000245989	0.000269998	0.000244372	0.000246627	0.000303432	0.000311102	0.000252726	0.000273623	0.000274005	0.000203565	0.000287718	0.000244346		-4.61088	3.99965e-05	9.72107e-05	9.93712e-06	3.2542e-05	2.89841e-05	-6.99803e-07	4.83863e-05	7.61938e-06	6.35244e-05	-4.33065e-06	1.67483e-05	2.08173e-06	5.85976e-05	5.55725e-05	7.20123e-05	2.86668e-05	2.96823e-05	3.97276e-05	8.48246e-06	6.26918e-05			1.17474	-1.6057	0.472253	-0.867387
	-4.60064	0.000242945	0.000269493	0.00022764	0.000240384	0.000281297	0.000273479	0.000286807	0.00026387	0.000244474	0.000306091	0.00025378	0.00021936	0.000268891	0.000295074	0.000250767	0.000279592	0.00026531	0.000234071	0.000271416	0.000275699		-4.60064	4.68483e-06	6.92297e-05	6.80662e-05	4.89105e-05	1.01033e-05	4.75287e-05	2.27984e-05	6.33621e-05	6.11937e-05	2.94454e-05	5.19337e-05	-1.18721e-05	3.65165e-05	6.83696e-05	4.96957e-05	4.72314e-05	9.26098e-06	2.96078e-05	2.60088e-05	7.14336e-05			1.20546	-1.65112	0.53694	-1.22308
	-4.5904	0.000242649	0.000305257	0.000251701	0.000250364	0.000274079	0.000275288	0.00030665	0.00027572	0.000262017	0.000335224	0.000274531	0.000213536	0.000242601	0.000276776	0.000291415	0.000275765	0.000276339	0.000268506	0.000286721	0.000307379		-4.5904	7.47013e-06	3.48736e-05	9.35213e-05	6.26502e-05	-1.08325e-06	6.07453e-05	2.1023e-05	9.36236e-05	6.08132e-05	5.95246e-05	6.54182e-05	-3.488e-07	3.14273e-05	7.06407e-05	2.86703e-05	6.10658e-05	-3.29584e-08	5.06418e-05	3.32135e-05	5.67733e-05			1.23618	-1.69908	0.736539	-1.47208
	-4.58016	0.000241659	0.000279112	0.000289045	0.000294658	0.00028284	0.000302181	0.000298004	0.000263226	0.000275064	0.000316345	0.000259255	0.000223321	0.00025696	0.000276945	0.000302632	0.000259445	0.000288961	0.000273036	0.000305432	0.000293907		-4.58016	4.91215e-05	3.14077e-05	7.93949e-05	5.31276e-05	-6.4247e-06	2.32801e-05	3.76371e-05	6.233e-05	6.11624e-05	5.72307e-05	4.5381e-05	7.09728e-06	4.64856e-05	4.21752e-05	3.964e-05	5.23959e-05	1.1217e-05	7.26134e-05	3.11941e-05	2.07924e-05			1.2669	-1.77238	0.488412	-1.37496
	-4.56992	0.000255948	0.000221646	0.000306445	0.000299567	0.000309245	0.000303567	0.000265687	0.000235608	0.000274515	0.000277159	0.000220375	0.000244736	0.000276726	0.000280186	0.000263675	0.000244605	0.000269455	0.000252216	0.00029175	0.000272214		-4.56992	8.06907e-05	3.39685e-05	5.62798e-05	2.26294e-05	2.63134e-06	1.52798e-07	4.03127e-05	2.10038e-05	5.92107e-05	3.28983e-05	2.85238e-05	-2.25358e-07	6.41672e-05	6.49756e-06	6.13435e-05	3.15809e-05	3.3643e-05	6.90353e-05	3.10343e-05	-2.10568e-06			1.29762	-1.70769	0.310816	-1.53175
	-4.55968	0.000273013	0.000216454	0.000292206	0.000246175	0.000319731	0.000266576	0.000226993	0.000226825	0.000275045	0.000265038	0.000216961	0.000275406	0.000273064	0.000257004	0.000233289	0.000239767	0.000227293	0.000233633	0.000254177	0.000284506		-4.55968	6.90333e-05	1.07923e-05	5.32897e-05	-2.53794e-07	2.28558e-05	2.87426e-05	1.89064e-05	1.92353e-05	6.19181e-05	1.11898e-05	4.98132e-05	-5.78143e-06	6.81967e-05	2.53488e-06	5.01252e-05	1.44279e-05	4.30188e-05	4.11886e-05	3.16112e-05	9.40441e-06			1.32834	-1.11415	0.199603	-1.96077
	-4.54944	0.000272847	0.000265319	0.000267738	0.00020847	0.000298486	0.000243921	0.000208676	0.000260651	0.000279033	0.000274444	0.000261622	0.000306923	0.000279498	0.000221116	0.000239009	0.000244148	0.000215244	0.000238302	0.000231914	0.000310323		-4.54944	3.15174e-05	-3.17845e-06	6.40883e-05	3.63639e-06	2.99162e-05	6.39055e-05	-1.88056e-07	3.54613e-05	6.60926e-05	2.70881e-07	8.68414e-05	6.31552e-07	5.7428e-05	2.47896e-05	1.22245e-05	8.21492e-09	2.57383e-05	8.01085e-06	2.69708e-05	3.77869e-05			1.35906	-1.02511	-0.15208	-2.02625
	-4.5392	0.000272459	0.000294503	0.000262862	0.000225676	0.000263041	0.000270629	0.000227029	0.000314933	0.000272107	0.000267	0.000302552	0.000318356	0.000316333	0.000212417	0.00024557	0.000255011	0.000247358	0.000259784	0.000239815	0.000312716		-4.5392	2.90024e-06	3.46421e-05	5.40783e-05	2.20533e-05	1.3218e-05	6.53769e-05	6.9292e-06	3.48117e-05	5.93075e-05	-3.56201e-06	8.69139e-05	5.97426e-06	3.99585e-05	3.00669e-05	-3.88381e-06	-9.31572e-06	1.38528e-06	-1.13381e-05	2.76555e-05	5.65152e-05			1.38978	-0.566247	-0.576185	-1.99544
	-4.52896	0.000291439	0.000278604	0.000283901	0.000248439	0.000240141	0.000309682	0.000263225	0.000338345	0.000252385	0.000244014	0.000307102	0.000302225	0.000335397	0.000235322	0.000241819	0.000275764	0.00027953	0.000274367	0.000252062	0.000302395		-4.52896	-5.03615e-06	8.73577e-05	1.52266e-05	3.24842e-05	-1.69389e-06	6.23773e-05	2.65271e-05	3.06504e-05	5.13661e-05	4.15268e-08	4.15893e-05	-1.30174e-06	2.89561e-05	6.70996e-06	1.79888e-05	9.3716e-07	4.01005e-06	-5.57432e-06	4.41222e-05	6.20814e-05			1.4205	-0.635891	-0.46296	-1.83119
	-4.51872	0.000305874	0.000255272	0.000305064	0.000243696	0.000237455	0.000305303	0.000278265	0.000305537	0.000244407	0.000234022	0.000298384	0.000278198	0.000290744	0.000259333	0.000254223	0.000298019	0.000280707	0.000266795	0.000246961	0.000302672		-4.51872	-1.02958e-06	9.35061e-05	-9.18151e-06	3.15194e-05	1.11893e-05	8.18873e-05	2.81168e-05	4.71747e-05	6.68036e-05	5.1455e-06	-2.3061e-06	-8.49789e-06	4.04962e-05	-4.17664e-07	4.64305e-05	2.34351e-05	3.70517e-05	2.2482e-05	6.03921e-05	6.24873e-05			1.45122	-0.45453	-0.267336	-1.7387
	-4.50848	0.000283115	0.000245048	0.000297565	0.000251215	0.000247991	0.000265448	0.000257562	0.000251513	0.000259494	0.000244957	0.000303644	0.000276196	0.000223138	0.000272066	0.000273743	0.000304729	0.000273358	0.000247603	0.000234907	0.000303851		-4.50848	9.24532e-06	6.41252e-05	1.51056e-05	3.09135e-05	3.78175e-05	9.04245e-05	8.38487e-06	7.04147e-05	9.29848e-05	-6.10645e-07	-3.74644e-06	3.17946e-06	7.39971e-05	4.412e-05	5.93029e-05	3.02569e-05	6.74773e-05	5.54754e-05	5.41687e-05	6.02356e-05			1.48194	0.00652151	0.0653893	-1.97711
	-4.49824	0.000246342	0.000231353	0.000262291	0.000288883	0.000263611	0.000240427	0.000225316	0.000233744	0.000278181	0.000260322	0.000306222	0.000294786	0.000212847	0.000280188	0.000264664	0.000289876	0.000275676	0.000236345	0.000240566	0.000287669		-4.49824	2.84772e-05	4.37398e-05	5.43627e-05	3.21946e-05	4.26661e-05	5.9499e-05	-7.83726e-06	7.14338e-05	8.45102e-05	-1.01554e-05	2.91729e-05	2.40778e-05	9.70297e-05	0.000100995	6.35772e-05	2.29226e-05	6.99361e-05	7.78684e-05	3.35455e-05	5.8966e-05			1.51266	0.154122	-0.202229	-1.87047
	-4.488	0.00024202	0.000214291	0.000236196	0.000306088	0.000279513	0.00024752	0.000212091	0.000260223	0.000279721	0.000276369	0.000279407	0.00030517	0.000272663	0.000277818	0.000244295	0.000272887	0.000270736	0.000241949	0.000269305	0.000268056		-4.488	5.1379e-05	3.14479e-05	5.65858e-05	2.82373e-05	2.28112e-05	2.36768e-05	-4.63603e-06	4.64207e-05	3.33113e-05	2.66186e-06	5.95261e-05	3.03343e-05	8.06674e-05	0.00010103	6.29938e-05	3.3814e-05	5.72035e-05	9.03136e-05	2.40678e-05	6.36859e-05			1.54338	0.346931	0.193861	-1.83966
	-4.47776	0.000273058	0.000208348	0.000253459	0.000270802	0.000283581	0.000253303	0.000221473	0.000279558	0.000272444	0.000294811	0.000233778	0.000290502	0.00033059	0.000257229	0.00025926	0.000269911	0.000251298	0.000257465	0.000302414	0.000267502		-4.47776	6.13334e-05	1.7093e-05	3.41533e-05	2.58535e-05	1.6096e-05	2.09595e-05	1.00137e-05	1.28182e-05	-8.12699e-06	3.80748e-05	5.9438e-05	2.62767e-05	4.38392e-05	4.96469e-05	5.64046e-05	6.00069e-05	5.51728e-05	9.7993e-05	2.9724e-05	6.61266e-05			1.5741	0.905772	0.0190469	-1.82152
	-4.46752	0.000300898	0.000213589	0.000293814	0.000224012	0.000263518	0.000237906	0.000238886	0.000259728	0.000271607	0.000305486	0.000213342	0.000270599	0.000323568	0.000243259	0.000298361	0.000275391	0.000244729	0.000273241	0.000307569	0.000280158		-4.46752	5.049e-05	3.04231e-05	3.65675e-05	3.89115e-05	4.61181e-05	3.39398e-05	2.57251e-05	-1.03555e-05	3.45031e-06	6.32328e-05	3.25393e-05	3.38435e-05	2.67588e-05	2.73979e-05	5.81106e-05	5.70764e-05	6.54144e-05	9.37362e-05	3.3483e-05	5.3896e-05			1.60482	1.15486	-0.0982976	-1.79603
	-4.45728	0.000305174	0.000223114	0.000294665	0.000209679	0.000228067	0.000229547	0.000254996	0.000239758	0.000275855	0.000294583	0.000236346	0.000268602	0.000269585	0.000263514	0.00030675	0.000275222	0.000262729	0.000280316	0.000277525	0.000281527		-4.45728	3.0588e-05	7.58266e-05	5.90078e-05	5.80307e-05	8.39989e-05	3.36221e-05	4.23359e-05	-8.84652e-06	4.56483e-05	6.37443e-05	1.29627e-05	4.17401e-05	3.02051e-05	6.55965e-05	7.17566e-05	1.85637e-05	6.80098e-05	6.80445e-05	3.07204e-05	3.56271e-05			1.63554	1.4083	-0.203817	-1.61886
	-4.44704	0.000291786	0.000245295	0.000241655	0.000220797	0.000209042	0.000258066	0.000270796	0.000263308	0.000275968	0.000269415	0.000274175	0.000275749	0.000227014	0.000301586	0.000280295	0.000275435	0.000279301	0.00027541	0.000251232	0.000264452		-4.44704	1.34669e-05	9.11655e-05	5.09751e-05	5.74936e-05	8.93202e-05	3.13605e-05	5.82171e-05	1.90328e-05	6.66147e-05	6.16111e-05	3.0085e-05	2.12532e-05	2.81598e-05	9.3234e-05	6.71314e-05	4.77104e-07	5.34464e-05	3.26966e-05	3.66609e-05	2.95211e-05			1.66626	1.09027	0.115769	-1.58999
	-4.4368	0.000273801	0.000272133	0.000206428	0.000236623	0.000225983	0.000297805	0.000281975	0.000300878	0.000273622	0.000248357	0.000287552	0.000263315	0.000214361	0.000310752	0.000264008	0.000288857	0.000276913	0.00026067	0.000273346	0.000246526		-4.4368	-6.3227e-07	4.36878e-05	1.1342e-05	3.74143e-05	6.89593e-05	4.73494e-05	6.59288e-05	5.33617e-05	5.29394e-05	6.59225e-05	6.18724e-05	-6.62075e-06	2.52377e-05	5.3503e-05	2.91697e-05	3.24754e-05	3.53845e-05	1.50716e-05	6.03961e-05	3.15731e-05			1.69698	0.78878	-0.0987985	-1.74517
	-4.42656	0.000263367	0.000273042	0.000243861	0.00025459	0.000261153	0.000299206	0.000278206	0.000294066	0.000273681	0.000245036	0.000274036	0.000233761	0.000214291	0.000278208	0.000272968	0.000310726	0.000276301	0.000244487	0.000315159	0.000247098		-4.42656	-8.17324e-06	-1.67864e-06	-2.00798e-07	2.94658e-05	5.92862e-05	6.84219e-05	6.30147e-05	6.42909e-05	3.398e-05	5.71946e-05	6.05985e-05	1.53638e-05	4.25039e-05	1.78927e-06	2.08526e-07	6.73351e-05	2.98211e-05	3.00087e-05	8.67043e-05	2.7485e-05			1.7277	0.570575	-0.0553449	-1.97159
	-4.41632	0.000277123	0.000239355	0.000299453	0.000271105	0.000278498	0.000261982	0.000252987	0.000253415	0.000274876	0.000259353	0.000253825	0.000226392	0.000229515	0.000234516	0.00027256	0.000317107	0.000294842	0.000228055	0.000304364	0.000265962		-4.41632	1.71114e-06	1.79591e-05	4.19189e-05	5.02188e-05	6.35025e-05	6.95448e-05	5.16033e-05	4.16389e-05	3.11892e-05	3.57528e-05	3.23928e-05	8.62066e-05	6.1744e-05	1.31704e-05	2.00314e-05	5.54607e-05	3.20448e-05	6.49179e-05	9.17254e-05	2.59731e-05			1.75842	0.371556	0.125769	-1.98296
	-4.40608	0.00031138	0.000211854	0.000288296	0.000275903	0.00026097	0.000238004	0.000218465	0.00024027	0.000274724	0.000279909	0.000243874	0.000261862	0.000270166	0.000213789	0.000247523	0.000294883	0.000309956	0.000213344	0.000240049	0.000282445		-4.40608	2.21084e-05	6.65569e-05	8.54317e-05	7.4322e-05	5.06411e-05	5.26339e-05	3.36876e-05	8.48112e-06	3.30826e-05	3.30961e-05	3.22471e-05	0.000134389	5.10338e-05	6.01759e-05	5.85006e-05	2.0232e-05	2.52919e-05	9.22813e-05	6.71377e-05	4.21277e-05			1.78914	0.68098	0.227274	-1.69789
	-4.39584	0.000337571	0.000221563	0.000227983	0.000274193	0.00022525	0.000256476	0.00019946	0.000267177	0.000274168	0.000285882	0.000251307	0.00030133	0.000304097	0.000220263	0.000227823	0.000258817	0.00029145	0.000214147	0.000214668	0.000279451		-4.39584	3.06594e-05	7.76899e-05	7.49321e-05	6.94929e-05	1.42885e-05	3.64482e-05	1.99486e-05	-2.40375e-06	2.64627e-05	5.33857e-05	6.13846e-05	0.000117701	3.09324e-05	6.56882e-05	6.05142e-05	1.48064e-05	7.40342e-06	8.94079e-05	2.82034e-05	6.02248e-05			1.81986	0.709174	-0.312806	-1.51638
	-4.3856	0.000329739	0.000248132	0.000203794	0.000277046	0.00020654	0.000290713	0.000210844	0.00028081	0.000273696	0.00026428	0.000278582	0.000296229	0.00029036	0.000244598	0.0002421	0.00024123	0.000252654	0.000247431	0.000272454	0.000266471		-4.3856	2.6264e-05	5.7635e-05	2.63476e-05	4.22232e-05	-1.19068e-05	2.45911e-05	2.80781e-05	1.33791e-05	2.46972e-05	5.97617e-05	5.76891e-05	7.12507e-05	4.12836e-05	3.00894e-05	3.23365e-05	4.23876e-05	-6.07496e-06	5.86547e-05	4.27635e-07	5.38974e-05			1.85058	0.401024	-0.365884	-1.6546
	-4.37536	0.000298949	0.000254639	0.000234397	0.000277357	0.000227801	0.000305929	0.000233376	0.000252727	0.000277949	0.000227643	0.000304705	0.000257992	0.000252063	0.000276507	0.000270196	0.000257165	0.000238408	0.000292396	0.00034045	0.000268984		-4.37536	3.37221e-05	5.2573e-05	-1.01053e-06	2.87181e-05	-6.38385e-06	7.86782e-06	5.25376e-05	2.94357e-05	4.23213e-05	3.94988e-05	1.41707e-05	3.93326e-05	6.17664e-05	1.39605e-05	2.68465e-05	6.2224e-05	-4.27465e-06	3.03456e-05	1.72009e-06	3.38532e-05			1.8813	0.271899	-0.161693	-1.82461
	-4.36512	0.000276419	0.00023975	0.000258431	0.00026163	0.000274273	0.000299628	0.000243737	0.000222418	0.00029522	0.000212593	0.000302348	0.00024086	0.000239355	0.000306674	0.00027496	0.000285086	0.00025992	0.000303776	0.000340317	0.000289748		-4.36512	5.5672e-05	6.30199e-05	1.82236e-05	4.34494e-05	8.14066e-06	-4.90337e-06	6.17751e-05	2.90829e-05	6.07285e-05	3.25571e-05	2.6483e-06	2.51319e-05	4.40189e-05	3.20298e-05	6.02812e-05	5.71598e-05	8.94996e-06	3.25242e-05	3.08114e-05	3.40819e-05			1.91202	0.48735	-0.194441	-1.92588
	-4.35488	0.000275625	0.00022211	0.000247604	0.000244665	0.000304461	0.000283083	0.000256682	0.000237084	0.000317054	0.000243323	0.000279542	0.000261754	0.000245174	0.000318335	0.000254141	0.000287436	0.000276849	0.000272075	0.000298768	0.000304599		-4.35488	5.8435e-05	5.29816e-05	5.51163e-05	6.04707e-05	3.96532e-06	1.28765e-05	4.50158e-05	2.89681e-05	5.34953e-05	6.65588e-05	4.17028e-05	2.38626e-05	5.36143e-06	4.34085e-05	9.26886e-05	5.35368e-05	2.55948e-05	5.41321e-05	6.58785e-05	5.60717e-05			1.94274	0.361369	-0.333646	-1.75779
	-4.34464	0.000278642	0.000211127	0.000241561	0.000256312	0.000291378	0.000261175	0.00030368	0.000281973	0.000315052	0.000296486	0.000276915	0.000283752	0.000231601	0.000302086	0.000244239	0.000259296	0.000260226	0.000240647	0.000276566	0.000301262		-4.34464	2.59355e-05	2.23474e-05	7.20223e-05	5.36045e-05	-3.68601e-06	6.06523e-05	3.07255e-05	4.49564e-05	3.36515e-05	0.000104123	6.05392e-05	4.53265e-05	6.91112e-06	2.81369e-05	9.15358e-05	7.2593e-05	3.70128e-05	6.02899e-05	7.68707e-05	6.41199e-05			1.97346	0.546779	-0.520614	-1.93667
	-4.3344	0.000271914	0.000208208	0.000268671	0.000297088	0.000253356	0.000245016	0.000352935	0.000305484	0.000279295	0.000316841	0.000298603	0.000280158	0.000213749	0.000267518	0.000260021	0.000239293	0.000242368	0.00023676	0.000273685	0.000302036		-4.3344	-5.90955e-06	1.32224e-05	6.39478e-05	3.35862e-05	1.9076e-05	9.27518e-05	3.40776e-05	6.06935e-05	3.48059e-05	8.99032e-05	3.61597e-05	8.11162e-05	5.13069e-05	6.72195e-06	7.18507e-05	9.28334e-05	3.3979e-05	4.31781e-05	5.5011e-05	3.89014e-05			2.00418	0.220013	-0.366867	-2.02041
	-4.32416	0.000267879	0.000217939	0.000293441	0.000325301	0.000229943	0.000249821	0.000334379	0.000284653	0.000246317	0.000285292	0.000301802	0.000268397	0.000225397	0.000241416	0.000274888	0.00025897	0.000262779	0.000246115	0.000259097	0.000321578		-4.32416	4.00314e-06	4.25723e-05	4.70375e-05	2.56738e-05	6.03519e-05	7.47412e-05	3.02995e-05	5.40105e-05	5.56676e-05	3.20015e-05	3.62438e-05	9.64769e-05	8.00073e-05	2.90633e-07	6.08553e-05	8.07334e-05	2.29689e-05	2.90453e-05	2.89066e-05	5.72888e-06			2.0349	-0.0977766	-0.459199	-2.73484
	-4.31392	0.000279321	0.000234795	0.000278725	0.000310232	0.000238935	0.000269753	0.000255373	0.000246802	0.000255643	0.00024794	0.000267699	0.000270934	0.000243923	0.00023764	0.00026327	0.00029602	0.000299865	0.000258209	0.000240394	0.000336296		-4.31392	4.43789e-05	6.83924e-05	3.21066e-05	3.00374e-05	6.73432e-05	3.7058e-05	8.42102e-06	3.23462e-05	6.66328e-05	-3.97059e-06	7.80382e-05	7.45247e-05	6.62255e-05	1.27164e-05	5.24857e-05	4.35138e-05	2.66309e-05	2.98624e-05	3.64372e-05	-1.8092e-06			2.06562	-0.302833	-0.544621	-3.1286
	-4.30368	0.000285166	0.000248541	0.000246447	0.000276116	0.000262325	0.000275842	0.000213417	0.000221642	0.000295495	0.000250883	0.000238818	0.00027936	0.000230452	0.000245484	0.000242171	0.000304821	0.00030415	0.000281005	0.000237914	0.000317271		-4.30368	6.69976e-05	4.85359e-05	2.43611e-05	3.08323e-05	2.87608e-05	3.19978e-05	5.13914e-07	1.41483e-05	6.24909e-05	1.70976e-05	8.76472e-05	4.0491e-05	4.05449e-05	3.49105e-05	2.67651e-05	2.48313e-05	4.29927e-05	2.97302e-05	7.33853e-05	1.40074e-05			2.09634	-0.341083	-0.823896	-3.05208
	-4.29344	0.000263559	0.000262858	0.000243027	0.000272687	0.00027467	0.000253231	0.000245039	0.00021368	0.000319254	0.000272594	0.000252271	0.000277304	0.000213197	0.000246536	0.000237405	0.000282682	0.000279267	0.000292274	0.000247102	0.000279171		-4.29344	5.26891e-05	8.16115e-06	2.97651e-05	3.0166e-05	1.39513e-07	5.62416e-05	1.996e-05	4.32874e-07	6.06004e-05	5.48209e-05	4.64611e-05	2.83145e-05	3.07829e-05	4.34864e-05	-1.87266e-06	4.65908e-05	3.63755e-05	2.56546e-05	9.31776e-05	2.92403e-05			2.12706	0.0358853	-0.383704	-3.26642
	-4.2832	0.00024002	0.000282459	0.000258108	0.000299094	0.000265983	0.000219995	0.000275372	0.000218503	0.000309791	0.000266602	0.000285171	0.000269004	0.000235015	0.000243961	0.000245226	0.000271234	0.000265765	0.000260393	0.000260103	0.000253499		-4.2832	3.16949e-05	5.49364e-06	3.95934e-05	4.15413e-05	1.5001e-05	6.16251e-05	3.01179e-05	-9.56193e-06	6.17539e-05	5.72183e-05	3.38344e-05	4.15513e-05	3.18142e-05	2.36072e-05	3.96293e-06	8.19771e-05	2.90425e-06	3.58118e-05	6.49377e-05	3.99422e-05			2.15778	-0.207545	-0.29689	-3.2905
	-4.27296	0.00025655	0.000286088	0.000245128	0.000306096	0.0002466	0.000210269	0.000255286	0.00024467	0.000288245	0.000245094	0.00029025	0.000271279	0.000272515	0.000255055	0.000246142	0.000293769	0.000273218	0.000216108	0.000283844	0.000244647		-4.27296	3.57097e-05	4.27697e-05	3.12604e-05	6.04221e-05	3.12333e-05	3.63205e-05	1.15856e-05	3.42305e-07	5.77157e-05	3.51885e-05	7.45471e-05	5.84684e-05	3.10389e-05	-5.39961e-07	4.1273e-05	9.45119e-05	-3.93019e-06	5.6537e-05	1.35622e-05	5.93081e-05			2.1885	-0.108609	-0.525917	-3.12505
	-4.26272	0.000295976	0.000259581	0.000209117	0.000272666	0.000233611	0.00024065	0.000246706	0.000284282	0.000275739	0.000256368	0.000258854	0.000286529	0.000280619	0.000283885	0.000244331	0.000321002	0.000277578	0.000223282	0.000305838	0.000238565		-4.26272	5.50038e-05	6.96694e-05	6.02378e-06	6.85335e-05	1.25819e-05	2.37054e-05	2.95835e-07	3.42351e-05	5.95274e-05	3.36283e-05	9.03193e-05	6.42121e-05	2.12369e-05	5.00925e-06	6.22381e-05	8.10523e-05	3.62867e-05	5.84594e-05	-1.02631e-05	7.63252e-05			2.21922	-0.200451	-0.495037	-3.43403
	-4.25248	0.000299827	0.000238199	0.000214271	0.000244207	0.000242239	0.000295832	0.000295506	0.000305374	0.000271493	0.000295933	0.000222174	0.000302682	0.000274664	0.00030652	0.000256142	0.000314501	0.000274797	0.000265838	0.000296742	0.000243505		-4.25248	6.24172e-05	6.65534e-05	2.37905e-07	6.13485e-05	-9.5559e-07	5.34185e-05	1.74277e-05	6.20832e-05	7.06095e-05	5.50873e-05	5.00667e-05	6.23034e-05	8.69042e-07	2.66834e-05	4.56651e-05	6.41945e-05	6.20446e-05	3.85847e-05	1.51561e-05	6.2458e-05			2.24994	-0.460934	-0.600526	-3.34848
	-4.24224	0.000261052	0.0002614	0.000270656	0.000255543	0.000271315	0.000337258	0.000339897	0.000292038	0.00027372	0.000304522	0.00021567	0.000308767	0.000280287	0.000298102	0.000281305	0.000276262	0.000275708	0.000266845	0.00026061	0.000271108		-4.24224	5.93787e-05	5.62586e-05	3.0859e-05	4.64625e-05	2.96121e-05	9.364e-05	3.16902e-05	5.50469e-05	6.42588e-05	6.61221e-05	2.85735e-05	5.44307e-05	-1.44847e-05	2.8194e-05	2.89992e-05	5.85663e-05	3.20638e-05	3.11807e-05	6.68414e-05	2.9155e-05			2.28066	-0.805333	-0.577918	-3.34204
	-4.232	0.000236943	0.000299973	0.00030532	0.00027481	0.000304125	0.000338431	0.000315028	0.000273367	0.000285401	0.000260617	0.000249407	0.000306266	0.00027449	0.000263719	0.000301171	0.000245937	0.000275114	0.000224374	0.000237628	0.00030542		-4.232	6.79805e-05	4.22722e-05	6.23313e-05	3.00218e-05	6.10105e-05	9.51535e-05	2.75388e-05	2.79785e-05	3.52622e-05	6.1971e-05	6.76769e-05	3.48979e-05	2.4445e-07	2.08617e-05	4.40835e-05	6.06137e-05	4.13455e-07	5.01549e-05	0.000104477	3.09116e-05			2.31138	-0.282667	-0.683028	-3.53624
	-4.22176	0.000258924	0.000295736	0.000275489	0.000253592	0.000317979	0.000306275	0.000263707	0.00027242	0.000303853	0.000211782	0.000297178	0.000296549	0.000238159	0.000235934	0.000303817	0.000255022	0.000260428	0.000221402	0.000241211	0.000316551		-4.22176	8.70064e-05	1.27572e-05	5.61299e-05	2.12301e-05	3.93396e-05	5.86507e-05	3.49465e-05	1.84924e-05	2.89918e-05	6.31203e-05	0.000104658	1.61805e-05	3.90894e-05	4.42485e-05	6.54299e-05	6.21659e-05	1.47227e-05	6.44575e-05	0.000104804	8.2389e-05			2.3421	-0.547112	-0.467362	-3.6855
	-4.21152	0.000289014	0.000256439	0.000242944	0.000210533	0.000305025	0.000275952	0.000256243	0.00027379	0.000313396	0.000207521	0.000313933	0.000277771	0.000213344	0.000235713	0.000289317	0.000296409	0.000244278	0.00027882	0.000241603	0.000304153		-4.21152	9.08782e-05	-5.23086e-06	2.78202e-05	3.23784e-05	-1.41199e-07	3.12245e-05	5.7651e-05	3.34777e-05	6.52859e-05	6.3861e-05	8.36628e-05	2.67212e-05	6.14773e-05	8.42133e-05	5.36806e-05	6.14253e-05	3.06919e-05	4.72645e-05	7.52046e-05	0.00012331			2.37282	-0.974851	-0.368744	-3.4368
	-4.20128	0.000284712	0.000236033	0.000266978	0.000204838	0.000273194	0.000276069	0.000282287	0.000258379	0.000305687	0.000240542	0.000284457	0.000254358	0.000228314	0.000250173	0.000266043	0.000326698	0.000241811	0.000313311	0.000222374	0.000286079		-4.20128	7.115e-05	2.07154e-05	1.86513e-05	5.45858e-05	1.1317e-05	4.01908e-05	5.71922e-05	4.24412e-05	9.18941e-05	4.59037e-05	3.47544e-05	5.83315e-05	4.77227e-05	8.54728e-05	1.77316e-05	6.13689e-05	9.39377e-06	1.50184e-05	4.13916e-05	0.000102741			2.40354	-1.0784	-0.399207	-3.49346
	-4.19104	0.00025629	0.000242305	0.000309707	0.000251897	0.000242865	0.00030418	0.000286862	0.00024168	0.00028737	0.000271574	0.000248183	0.000243992	0.0002442	0.000251722	0.000247122	0.000311452	0.000244011	0.000273115	0.000210005	0.000273634		-4.19104	4.79019e-05	5.7323e-05	3.32949e-05	6.04417e-05	6.39158e-05	6.08843e-05	3.4174e-05	2.56318e-05	6.74366e-05	2.99633e-05	5.18899e-06	6.30111e-05	2.99288e-05	4.65755e-05	-2.93771e-06	6.16869e-05	5.60094e-07	-9.63862e-07	2.40279e-05	5.7874e-05			2.43426	-0.865592	-0.197998	-3.66957
	-4.1808	0.000241745	0.000241884	0.000304585	0.000299173	0.000231883	0.000322566	0.000267486	0.000239484	0.000274558	0.000273534	0.000252968	0.000254008	0.000227464	0.000233295	0.000246133	0.000265822	0.000230714	0.000218616	0.00022932	0.000269178		-4.1808	3.45182e-05	5.32076e-05	4.0411e-05	4.37854e-05	8.65314e-05	5.71297e-05	3.5718e-05	2.69598e-06	3.02999e-05	4.96244e-05	-4.17093e-06	3.37451e-05	4.10373e-05	2.68595e-05	6.5503e-06	5.37188e-05	3.81655e-05	5.84331e-06	2.61323e-05	5.77898e-05			2.46498	-0.905996	-0.368959	-3.97484
	-4.17056	0.00025832	0.000239619	0.000267671	0.000302412	0.000246329	0.000304719	0.00026377	0.000245893	0.000271912	0.000248909	0.000292494	0.000273897	0.00021348	0.000214516	0.000262962	0.000243553	0.000212671	0.000224493	0.000263188	0.000276011		-4.17056	2.07377e-05	3.14495e-05	2.71118e-05	2.91376e-05	5.71866e-05	3.02126e-05	5.99444e-05	2.53306e-06	2.54355e-05	8.78291e-05	-4.03521e-06	2.96267e-05	6.35626e-05	4.90076e-05	2.57055e-05	3.31478e-05	6.08059e-05	2.29029e-05	3.81841e-05	9.76099e-05			2.4957	-0.932569	-0.708994	-3.68852
	-4.16032	0.000294702	0.000265708	0.000258783	0.000280063	0.000268269	0.000273951	0.000282666	0.000257695	0.000274813	0.000219158	0.000313771	0.000290417	0.000230239	0.000221131	0.000281616	0.00026701	0.000217951	0.000276096	0.000277234	0.000281385		-4.16032	2.88581e-06	4.23909e-05	1.82749e-05	2.91077e-05	2.68833e-05	6.49836e-06	5.1955e-05	2.09982e-05	3.03663e-05	9.6233e-05	1.47307e-05	7.13981e-05	5.79289e-05	6.62543e-05	2.94322e-05	1.64935e-05	2.65999e-05	4.16688e-05	5.36943e-05	0.000103964			2.52642	-0.734629	-0.451065	-3.0701
	-4.15008	0.000321449	0.00030136	0.000279563	0.000275901	0.00027383	0.000275858	0.0002868	0.000283285	0.000276356	0.000212374	0.000288323	0.000305284	0.000244341	0.000257135	0.000283034	0.000303516	0.000248065	0.000306804	0.000263386	0.00027168		-4.15008	4.95595e-06	6.24224e-05	3.84098e-05	3.02889e-05	3.32761e-05	9.37547e-08	1.17284e-05	3.2167e-05	1.36753e-05	6.54946e-05	5.07528e-05	9.18044e-05	2.31743e-05	4.4886e-05	1.20919e-05	2.87557e-05	-1.13787e-07	5.79066e-05	7.782e-05	4.72803e-05			2.55714	-0.885924	-0.517049	-2.82783
	-4.13984	0.000312961	0.000295408	0.000274157	0.000283809	0.000258276	0.000300832	0.000260527	0.000306871	0.000273935	0.000236985	0.000247453	0.000313703	0.000227323	0.000291602	0.000261089	0.000315217	0.000262587	0.000288141	0.000245918	0.000262676		-4.13984	4.67033e-05	3.90109e-05	7.51554e-05	2.77167e-05	4.55587e-05	9.91502e-06	3.61457e-06	3.06003e-05	-1.37254e-07	2.57245e-05	7.52631e-05	4.75212e-05	-2.75503e-06	1.63893e-05	-9.49663e-06	6.55876e-05	3.16993e-05	6.07295e-05	0.000112327	-7.01657e-06			2.58786	-1.05902	-0.247428	-2.78394
	-4.1296	0.000274502	0.000252533	0.000228905	0.000266043	0.000241684	0.000303862	0.000240119	0.000296942	0.000260781	0.000273009	0.000239342	0.000304107	0.000212626	0.000286922	0.00022708	0.000305438	0.000237714	0.000251608	0.000248294	0.000281569		-4.1296	0.000103127	1.84568e-06	9.40424e-05	3.30219e-05	2.39878e-05	3.35951e-05	4.2199e-05	3.20507e-05	1.46886e-05	7.43958e-07	6.75657e-05	-1.37669e-06	4.32224e-06	2.10446e-05	-1.00035e-05	9.17461e-05	6.27603e-05	4.06584e-05	0.000133129	1.14821e-05			2.61858	-0.778072	-0.0400708	-2.92816
	-4.11936	0.000245678	0.000226819	0.000200161	0.000227186	0.00023835	0.000290412	0.000255181	0.000259693	0.000241505	0.000288464	0.000263005	0.000281304	0.000228193	0.000250483	0.00020316	0.000283307	0.000208145	0.000241049	0.000268756	0.000307906		-4.11936	0.000124658	2.2187e-05	8.0093e-05	3.87019e-05	-5.87032e-06	5.77809e-05	7.01421e-05	3.56726e-05	3.19003e-05	6.3663e-07	4.22789e-05	4.95524e-06	2.5629e-05	4.8058e-05	1.74703e-05	8.48754e-05	3.44824e-05	9.34205e-06	0.000107561	7.29072e-05			2.6493	-0.544193	0.33485	-2.2813
	-4.10912	0.000251086	0.000240078	0.000228537	0.000213719	0.000246715	0.000311057	0.00027591	0.000241815	0.000242191	0.000274882	0.00027617	0.000275365	0.000247637	0.000236981	0.000205585	0.000242596	0.000219513	0.000265765	0.000283423	0.000297004		-4.10912	9.86062e-05	8.42275e-05	5.15987e-05	2.2875e-05	8.00343e-06	5.96291e-05	6.41711e-05	2.34139e-05	2.87669e-05	3.02806e-05	2.98859e-05	3.24551e-05	2.85769e-05	6.17207e-05	5.16251e-05	6.05097e-05	-5.57526e-06	-2.89314e-06	4.52272e-05	8.81551e-05			2.68002	-0.448123	0.480201	-1.65545
	-4.09888	0.000272218	0.000262831	0.000270327	0.000232357	0.000261434	0.000347843	0.000263453	0.000260795	0.00028654	0.000250277	0.000259381	0.000293978	0.000246062	0.000271019	0.000226982	0.000194993	0.00024715	0.000291025	0.000277788	0.000257593		-4.09888	6.4401e-05	9.8313e-05	3.36554e-05	-1.37833e-06	5.00495e-05	4.01336e-05	6.52268e-05	2.27185e-06	3.42872e-05	6.49746e-05	4.14908e-05	3.35525e-05	1.01234e-05	5.72387e-05	6.79602e-05	4.04606e-05	4.54245e-06	1.93339e-05	2.35423e-06	3.7258e-05			2.71074	-0.500015	1.0118	-1.16641
	-4.08864	0.000279289	0.000273998	0.000267291	0.000247849	0.000279257	0.000324025	0.000242306	0.000279122	0.000346942	0.000244479	0.000244025	0.000304476	0.000246155	0.000304402	0.00024282	0.000184137	0.000236621	0.000281467	0.000265993	0.000244836		-4.08864	5.66273e-05	3.91565e-05	3.03952e-05	1.04558e-05	5.8373e-05	3.09317e-05	8.68652e-05	6.84025e-06	6.91934e-05	6.01427e-05	5.95939e-05	3.18806e-05	-1.0746e-06	5.82921e-05	6.48956e-05	3.02402e-05	3.80684e-05	5.5092e-05	9.78198e-06	-1.18367e-05			2.74146	-0.428642	1.14101	-1.23901
	-4.0784	0.000275021	0.000277276	0.000242183	0.000258481	0.00028453	0.000244801	0.000259763	0.000261777	0.000363854	0.000269309	0.000255089	0.000277089	0.000264414	0.000287461	0.000241764	0.000216762	0.000206546	0.000248434	0.000271681	0.000265928		-4.0784	6.1457e-05	-1.75076e-05	3.03697e-05	6.33339e-05	3.42258e-05	4.65277e-05	8.62844e-05	4.32462e-05	9.38717e-05	1.86188e-05	5.79856e-05	5.21504e-05	1.43949e-05	6.9913e-05	5.33524e-05	3.58974e-05	4.18416e-05	7.15368e-05	2.99203e-05	-1.29751e-05			2.77218	0.390476	0.991261	-0.659409
	-4.06816	0.000274079	0.000275192	0.000256866	0.000289864	0.000266327	0.000215382	0.00029797	0.000229979	0.000318404	0.000308016	0.000273454	0.000238259	0.000275905	0.000249144	0.000240908	0.00024591	0.000227426	0.000240614	0.000285921	0.000272914		-4.06816	4.99908e-05	-3.45931e-06	3.26176e-05	0.000102319	3.62607e-05	6.43576e-05	4.67664e-05	6.92329e-05	6.71498e-05	6.23689e-07	3.39886e-05	5.98602e-05	3.86171e-05	6.65597e-05	3.66219e-05	6.59528e-05	2.62757e-05	6.35806e-05	1.9302e-05	7.73994e-06			2.8029	0.606186	1.18493	-0.510372
	-4.05792	0.000274806	0.000261383	0.000297666	0.000314027	0.000244604	0.000268605	0.000302004	0.000229556	0.000259473	0.000323044	0.000274422	0.000239945	0.000259711	0.000245337	0.000255875	0.000244621	0.000288041	0.000273209	0.000278124	0.000251996		-4.05792	3.12421e-05	5.78656e-05	4.85154e-05	8.56591e-05	6.21942e-05	6.60092e-05	1.29192e-05	5.03973e-05	1.75998e-05	3.21205e-05	1.56885e-05	3.78933e-05	4.06023e-05	3.47712e-05	2.03334e-05	9.73171e-05	2.57675e-05	5.4298e-05	2.43016e-07	2.19186e-05			2.83362	0.783856	1.00799	-0.252191
	-4.04768	0.000269867	0.00024443	0.000296772	0.000285154	0.000249424	0.000309542	0.000278603	0.000265793	0.000237287	0.000300773	0.000273958	0.000287569	0.000232917	0.000270656	0.0002731	0.000245984	0.000299102	0.000304091	0.000248771	0.00024532		-4.04768	3.55385e-05	9.18855e-05	7.17949e-05	4.10436e-05	4.98035e-05	5.86313e-05	2.12325e-05	8.97165e-06	7.32972e-06	6.30934e-05	2.84727e-05	3.38996e-05	2.21317e-05	2.74404e-06	2.41699e-05	8.59827e-05	3.10597e-05	5.98196e-05	1.79479e-05	3.93729e-05			2.86434	0.790475	1.13018	-0.159818
	-4.03744	0.000274459	0.000237696	0.000255576	0.000243534	0.000270243	0.000276285	0.000279131	0.000299389	0.000250551	0.000272589	0.000290294	0.000320373	0.000216459	0.000280379	0.000268857	0.000266547	0.000242669	0.000289848	0.0002424	0.000266182		-4.03744	6.09469e-05	6.07396e-05	7.25993e-05	2.3711e-05	6.46734e-06	4.49442e-05	5.09094e-05	-6.62236e-06	4.76393e-05	5.19111e-05	5.63659e-05	6.96778e-05	1.8218e-05	3.60485e-06	5.58717e-05	3.30259e-05	1.58544e-05	6.86554e-05	5.84409e-05	5.91514e-05			2.89506	1.19065	1.52644	0.477351
	-4.0272	0.000301534	0.000244419	0.000247531	0.000261743	0.000270863	0.00023493	0.000302198	0.000305583	0.00026836	0.000278257	0.00030511	0.000290156	0.000214208	0.000274719	0.000248361	0.00027306	0.000207444	0.000247338	0.000275885	0.000273838		-4.0272	7.33516e-05	-1.41798e-06	4.40019e-05	4.34294e-05	1.1536e-05	2.30601e-05	6.29117e-05	1.826e-05	8.80922e-05	2.74985e-05	6.16617e-05	9.45739e-05	4.88888e-05	2.75647e-05	8.83291e-05	-3.87808e-06	-9.34329e-06	6.25624e-05	6.70739e-05	5.57565e-05			2.92578	1.46188	1.8836	0.416213
	-4.01696	0.000336651	0.000258331	0.000289495	0.000304524	0.000250507	0.000250544	0.000295296	0.000303564	0.000276562	0.000303313	0.000293242	0.000230391	0.000229929	0.000283289	0.000235803	0.000252508	0.000243163	0.000225549	0.000304908	0.000252339		-4.01696	6.06494e-05	-2.95849e-05	2.60754e-05	6.20278e-05	6.99979e-05	1.64792e-05	5.02722e-05	5.35941e-05	8.49981e-05	2.5345e-05	4.08732e-05	7.7353e-05	8.64312e-05	3.96403e-05	8.97051e-05	8.78558e-06	-1.2308e-05	4.38548e-05	3.25811e-05	3.48833e-05			2.9565	1.59325	2.08656	0.480451
	-4.00672	0.000349561	0.000275793	0.00030892	0.000282888	0.000245099	0.000285586	0.000253276	0.00030733	0.000277305	0.000300542	0.000274525	0.000217201	0.000260694	0.000303701	0.000241738	0.000245528	0.000295051	0.000243061	0.000285825	0.000245483		-4.00672	4.93161e-05	3.9738e-06	4.58071e-05	5.27351e-05	9.41176e-05	4.4559e-05	3.3182e-05	6.24126e-05	4.97599e-05	3.10905e-05	3.07043e-05	5.71168e-05	8.2563e-05	3.17011e-05	6.59086e-05	3.62432e-05	1.54116e-05	3.08492e-05	-1.69886e-06	3.45173e-05			2.98722	2.01827	2.15815	0.77669
	-3.99648	0.000333562	0.00028418	0.000265979	0.000223014	0.00026466	0.000285246	0.000227218	0.000289719	0.000269996	0.000264068	0.000281624	0.000266797	0.000277882	0.000310239	0.000256469	0.000265816	0.000308963	0.00026953	0.000244091	0.00028329		-3.99648	6.31955e-05	6.21205e-05	6.50311e-05	3.34368e-05	5.33969e-05	6.93656e-05	2.69359e-05	3.99637e-05	1.97031e-05	2.79891e-05	4.73936e-05	6.01479e-05	2.76296e-05	2.41493e-05	4.45302e-05	3.82002e-05	5.05432e-05	2.97897e-05	3.58284e-08	5.57941e-05			3.01794	2.01712	2.64953	1.16204
	-3.98624	0.000302243	0.000272133	0.000218034	0.000226575	0.000280236	0.000267913	0.000240067	0.000233953	0.000253233	0.000241913	0.000306346	0.000323197	0.000262116	0.000305437	0.000272691	0.000272972	0.000299055	0.000274582	0.000228751	0.000326285		-3.98624	8.76705e-05	9.3583e-05	4.10707e-05	3.45922e-05	1.65018e-05	4.38511e-05	2.98724e-05	1.76917e-05	5.39155e-06	3.43381e-05	6.13743e-05	5.73775e-05	-2.6413e-05	3.00772e-05	3.22622e-05	2.89732e-05	6.40658e-05	3.06214e-05	3.06579e-05	5.88835e-05			3.04866	1.91616	2.78616	1.27678
	-3.976	0.000270854	0.000249598	0.000228957	0.000288677	0.000277244	0.000268943	0.000255652	0.000186541	0.000237615	0.000257602	0.00030544	0.000340487	0.000243177	0.000297954	0.000282631	0.000252396	0.000284541	0.000258405	0.0002452	0.00032065		-3.976	9.02739e-05	9.43239e-05	4.36711e-06	5.47138e-05	2.32885e-05	1.847e-06	3.25881e-05	2.44468e-05	-4.76467e-06	5.40964e-05	4.85925e-05	3.69045e-05	-1.94251e-05	4.47133e-05	1.73869e-05	4.1771e-05	4.55732e-05	2.86075e-05	6.24314e-05	3.71296e-05			3.07938	2.00294	2.97401	1.10649
	-3.96576	0.000247606	0.000245285	0.00027845	0.000311824	0.000273159	0.000278157	0.000246582	0.000195738	0.000237697	0.000279583	0.000270078	0.000328884	0.000255358	0.000274672	0.00027611	0.00024545	0.000259383	0.00024359	0.00026421	0.000274437		-3.96576	6.09999e-05	9.17651e-05	6.64059e-06	6.76895e-05	3.52032e-05	1.58041e-05	3.10434e-05	4.45987e-05	-6.39273e-06	6.11104e-05	2.91827e-05	3.29234e-05	3.70567e-05	6.12683e-05	1.04655e-06	7.24265e-05	1.25592e-05	3.09286e-05	7.24272e-05	3.02217e-05			3.1101	2.35559	2.85938	0.742958
	-3.95552	0.000245785	0.000263031	0.000305475	0.000282148	0.000275417	0.0002768	0.000231435	0.000236449	0.000253641	0.000279621	0.000239697	0.000312513	0.000275265	0.000233753	0.000254968	0.000265841	0.00024103	0.000240658	0.000275403	0.000244205		-3.95552	2.57433e-05	8.5163e-05	2.87878e-05	6.37277e-05	3.06549e-05	7.3962e-05	2.8152e-05	3.75888e-05	1.17023e-05	5.66299e-05	2.65499e-05	5.36085e-05	6.65668e-05	7.08392e-05	-5.21831e-06	9.17631e-05	-3.179e-06	3.5246e-05	5.96273e-05	5.30614e-05			3.14082	2.51042	2.90675	0.741401
	-3.94528	0.000272418	0.000275055	0.000293307	0.000274258	0.000267779	0.000273166	0.000241787	0.000257601	0.0002705	0.000272773	0.000247405	0.000299638	0.000258016	0.000213594	0.00024407	0.000273469	0.000260698	0.000244453	0.000279361	0.000255017		-3.94528	1.74598e-05	5.17485e-05	2.16125e-05	5.75801e-05	3.8059e-05	9.30686e-05	3.00492e-05	3.93779e-06	3.04204e-05	6.70459e-05	3.09146e-05	6.05072e-05	3.43854e-05	6.02058e-05	-3.33767e-07	8.78025e-05	1.38656e-05	2.95266e-05	4.99185e-05	6.73489e-05			3.17154	2.64523	2.76193	0.360309
	-3.93504	0.000313958	0.000261202	0.000276075	0.000300917	0.000248793	0.000274422	0.000275551	0.000269923	0.000276447	0.000273895	0.000270544	0.000299012	0.0002197	0.000229767	0.000256184	0.000253077	0.000298119	0.000245473	0.000273156	0.000273824		-3.93504	3.50754e-05	7.59776e-06	1.02872e-06	5.99011e-05	5.87439e-05	5.11448e-05	4.15821e-05	-4.64836e-06	2.23731e-05	7.51481e-05	2.89152e-05	4.04294e-05	-3.45557e-08	2.85532e-05	1.10156e-05	7.05371e-05	4.91716e-05	2.13604e-05	6.43461e-05	4.26371e-05			3.20226	2.53188	2.43828	0.536792
	-3.9248	0.000339123	0.000239248	0.000275752	0.000296635	0.000242947	0.000273197	0.000304559	0.000304456	0.000275051	0.00027332	0.000273019	0.000313375	0.000218284	0.000244131	0.000274766	0.000243599	0.000302827	0.000243717	0.000266133	0.0002654		-3.9248	4.27821e-05	5.4788e-06	1.04963e-05	6.42086e-05	5.18573e-05	1.40864e-05	6.05246e-05	3.82036e-05	2.41237e-06	4.30716e-05	3.26163e-05	2.52505e-05	1.99236e-05	-2.11193e-06	3.08169e-05	5.58446e-05	7.84774e-05	3.41454e-05	7.83742e-05	3.33015e-06			3.23298	2.29511	2.34463	0.311636
	-3.91456	0.000329685	0.000234816	0.00027642	0.000252296	0.000265027	0.000272602	0.000302744	0.000334893	0.000274451	0.000270436	0.000264716	0.000315514	0.000262902	0.000228147	0.000278534	0.000263249	0.000279449	0.000241997	0.000278107	0.000246003		-3.91456	2.44128e-05	5.57021e-05	3.0114e-05	6.25714e-05	1.15603e-05	2.22216e-05	7.19349e-05	8.80002e-05	5.59526e-06	1.46347e-06	4.98665e-05	2.85748e-05	5.75533e-05	-1.01743e-05	5.3643e-05	5.58723e-05	9.12911e-05	5.94913e-05	5.32766e-05	-4.77382e-06			3.2637	2.31287	2.61842	0.936302
	-3.90432	0.000295993	0.000249598	0.000259244	0.000234035	0.000296034	0.000279166	0.000274451	0.000317497	0.000274911	0.000282158	0.000281401	0.000282195	0.000296603	0.000213068	0.000274495	0.0002806	0.000276111	0.000245261	0.000290186	0.000249212		-3.90432	1.46477e-05	0.000101128	1.84011e-05	5.29997e-05	-1.63729e-05	3.97337e-05	6.11267e-05	9.21204e-05	2.60842e-05	1.32639e-05	6.3006e-05	3.04494e-05	5.4189e-05	2.36216e-06	6.10297e-05	6.71044e-05	8.76055e-05	5.74146e-05	7.87725e-06	2.59458e-05			3.29442	2.19544	2.37483	0.126133
	-3.89408	0.000267829	0.000266861	0.000243954	0.000267652	0.000307218	0.000279108	0.000246944	0.000277459	0.000273151	0.000301678	0.000308005	0.000246417	0.000281562	0.000226561	0.000274895	0.000277486	0.000299804	0.000257692	0.000264831	0.000271045		-3.89408	4.23928e-05	9.1298e-05	9.91524e-08	3.43798e-05	-6.08324e-06	3.42787e-05	3.7063e-05	6.37262e-05	3.25616e-05	5.52019e-05	6.14309e-05	2.82543e-05	3.18766e-05	1.90332e-05	4.65661e-05	6.8102e-05	6.82008e-05	2.16181e-05	5.42769e-06	5.83264e-05			3.32514	2.0581	2.18447	-0.506649
	-3.88384	0.000264599	0.000277161	0.000262228	0.000296721	0.000287249	0.000259687	0.000244655	0.000264623	0.000273511	0.000301226	0.00029636	0.00025683	0.000247181	0.000246489	0.000273983	0.000273566	0.000306926	0.000280641	0.000220698	0.000280793		-3.88384	6.98969e-05	4.30784e-05	1.41622e-05	1.13692e-05	1.82686e-05	2.96303e-05	3.11979e-05	5.11027e-05	2.91876e-05	5.06949e-05	6.35698e-05	3.98514e-05	4.12262e-05	3.33192e-05	2.9416e-05	4.90251e-05	4.20467e-05	-2.26316e-06	5.6748e-05	5.82893e-05			3.35586	2.02134	1.96985	-0.587397
	-3.8736	0.000281878	0.000278522	0.000302381	0.000278895	0.000250763	0.000243731	0.000261221	0.000274295	0.000277748	0.000281642	0.000255077	0.000296855	0.000241772	0.000246701	0.000259667	0.000275997	0.000281342	0.000301253	0.000219102	0.000275466		-3.8736	4.68978e-05	6.22015e-06	3.08248e-05	-8.14618e-08	3.00084e-05	5.21937e-05	5.89738e-05	6.08368e-05	4.16972e-05	8.75092e-06	8.11688e-05	5.813e-05	6.11313e-05	4.98354e-05	2.63924e-05	3.16769e-05	2.99185e-05	1.24618e-05	9.88487e-05	3.4169e-05			3.38658	1.62335	1.55116	-0.237933
	-3.86336	0.000299586	0.000269605	0.000305942	0.000244605	0.000226809	0.000254242	0.000275436	0.000274757	0.000276881	0.000270757	0.00024827	0.000301963	0.000263579	0.000244989	0.000241991	0.000267202	0.000258844	0.000303176	0.000258191	0.000273292		-3.86336	3.44023e-06	1.53529e-06	1.3256e-05	9.57072e-06	3.06551e-05	7.8366e-05	9.44586e-05	5.7548e-05	5.99728e-05	7.24638e-06	9.37052e-05	6.10869e-05	4.15651e-05	6.29671e-05	3.11948e-05	3.39661e-05	4.13934e-05	3.56824e-05	8.67485e-05	1.86432e-05			3.4173	1.32536	1.73618	0.1211
	-3.85312	0.000306564	0.000252714	0.000247609	0.000242861	0.000239241	0.000272711	0.000276692	0.000274664	0.000261821	0.0002737	0.000286177	0.000258321	0.000275126	0.000260453	0.000237562	0.000248715	0.000270148	0.000286358	0.000274325	0.000274987		-3.85312	1.22369e-05	1.72903e-05	-4.18195e-07	2.93455e-05	3.05477e-05	6.9217e-05	9.50882e-05	3.06685e-05	5.37316e-05	4.92971e-05	7.93751e-05	5.88633e-05	2.53688e-06	5.29738e-05	3.11026e-05	3.55346e-05	5.93184e-05	3.69683e-05	4.96278e-05	2.83997e-05			3.44802	0.817403	1.89416	0.0777852
	-3.84288	0.000306499	0.000239049	0.000181355	0.000266716	0.000277444	0.000273018	0.000274409	0.000283532	0.000245419	0.000273267	0.00030779	0.000221901	0.000259713	0.000278097	0.000245794	0.000240901	0.000296275	0.000270411	0.000252604	0.000263777		-3.84288	6.89545e-05	4.35298e-05	2.93386e-05	4.53905e-05	3.08714e-05	2.91891e-05	5.37691e-05	1.40462e-05	3.28945e-05	6.25337e-05	4.97546e-05	7.39235e-05	-6.21762e-07	2.15445e-05	3.15013e-05	1.58626e-05	6.42914e-05	2.8007e-05	3.13373e-05	5.69523e-05			3.47874	0.0479879	1.84174	0.0287062
	-3.83264	0.000302007	0.000238654	0.000183191	0.000274866	0.000304345	0.000272389	0.000275105	0.000273347	0.000248406	0.000272342	0.000287152	0.000235339	0.000244323	0.000278763	0.000248926	0.00024378	0.000305538	0.000268931	0.000246064	0.00024495		-3.83264	9.72225e-05	7.71935e-05	6.12889e-05	6.08717e-05	3.06484e-05	1.1866e-06	9.90711e-06	3.2003e-05	3.38765e-05	3.64557e-05	3.19964e-05	9.11915e-05	2.89839e-05	1.00282e-05	4.56258e-05	-9.57047e-07	6.14013e-05	2.72951e-05	3.1202e-05	9.03366e-05			3.50946	-0.486306	1.55179	0.149926
	-3.8224	0.000286029	0.000251534	0.000249815	0.00025487	0.000296591	0.000291561	0.000273425	0.000233325	0.000271215	0.000280583	0.000272034	0.000270263	0.000253792	0.000273233	0.0002419	0.000241894	0.000299449	0.00027945	0.000267844	0.000237629		-3.8224	7.39771e-05	9.95163e-05	5.06301e-05	8.02668e-05	3.0623e-05	8.4148e-06	1.3296e-06	5.9588e-05	5.79414e-05	3.74608e-05	3.17363e-05	8.30987e-05	5.0278e-05	4.69365e-05	6.46498e-05	1.20933e-05	6.26867e-05	3.36489e-05	3.04584e-05	0.00010823			3.54018	-0.890645	1.94534	0.387439
	-3.81216	0.000264232	0.000268478	0.000306609	0.000244303	0.000275444	0.000305923	0.000259359	0.00021401	0.000286938	0.000280025	0.000291451	0.000277639	0.000274567	0.000274449	0.000237704	0.000241654	0.000304162	0.000295311	0.000271105	0.000244102		-3.81216	5.82812e-05	8.24737e-05	3.01983e-05	9.19568e-05	3.06433e-05	2.87074e-05	1.91114e-05	5.98929e-05	7.14865e-05	8.0592e-05	3.24782e-05	6.3495e-05	6.11583e-05	9.10022e-05	5.74514e-05	3.04146e-05	6.18237e-05	4.81061e-05	3.3281e-05	9.21164e-05			3.5709	-1.90369	1.65972	0.10919
	-3.80192	0.000263802	0.000278584	0.000303387	0.000270068	0.000275729	0.00028343	0.000239807	0.000243925	0.000276768	0.000255751	0.000312863	0.000255106	0.000271224	0.000271822	0.000248604	0.000256008	0.000316458	0.000311204	0.00024825	0.000247506		-3.80192	8.10353e-05	3.27435e-05	3.35888e-05	8.27027e-05	3.0325e-05	3.36793e-05	3.29217e-05	3.82933e-05	6.25606e-05	9.63567e-05	2.98663e-05	6.02209e-05	8.08167e-05	7.96788e-05	1.76791e-05	1.92513e-05	4.81014e-05	7.11715e-05	5.01226e-05	5.35737e-05			3.60162	-2.96804	1.27286	-0.0501363
	-3.79168	0.000291962	0.000277214	0.00027208	0.000307005	0.000304874	0.000246686	0.000233994	0.000276911	0.000252585	0.000241042	0.000310527	0.000243212	0.000242962	0.000254319	0.000266587	0.000272883	0.000305999	0.000313586	0.000251638	0.000243939		-3.79168	9.32988e-05	-2.15526e-07	2.87585e-05	5.95262e-05	3.06312e-05	3.04301e-05	4.37081e-05	3.14351e-05	5.37187e-05	4.78718e-05	4.43464e-05	6.23245e-05	9.16986e-05	2.39771e-05	-1.00189e-05	2.06996e-07	3.09811e-05	7.56996e-05	6.86625e-05	3.02782e-05			3.63234	-3.67021	0.614114	-0.36266
	-3.78144	0.000309985	0.000270968	0.000263529	0.000307076	0.0003339	0.00023385	0.000250175	0.000266635	0.00024391	0.000267686	0.000298661	0.000258816	0.000226704	0.000240855	0.000276271	0.000274049	0.000267964	0.000291409	0.000291108	0.000241045		-3.78144	5.43659e-05	1.10661e-05	7.15683e-07	3.95045e-05	3.02119e-05	4.07891e-05	7.05111e-05	4.86062e-05	6.06977e-05	-8.20346e-06	8.50038e-05	4.70213e-05	6.61332e-05	-5.76659e-06	1.26518e-05	1.60781e-05	2.60462e-05	4.00811e-05	6.86154e-05	3.15462e-05			3.66306	-4.55715	0.404783	-0.85038
	-3.7712	0.000285672	0.000271906	0.000276046	0.000269508	0.000335093	0.00024353	0.000269673	0.000240308	0.000257203	0.000302706	0.000284215	0.000274437	0.000246818	0.000256759	0.000275404	0.000273154	0.000244051	0.000256766	0.00030513	0.000244673		-3.7712	7.95049e-07	3.04258e-05	4.38744e-06	2.99777e-05	3.07671e-05	6.0486e-05	9.57625e-05	6.23827e-05	6.91362e-05	-7.53498e-06	0.000119846	3.09825e-05	2.83103e-05	1.46593e-05	5.28576e-05	5.5698e-05	3.07179e-05	1.75228e-06	5.08428e-05	2.98854e-05			3.69378	-4.9464	-0.204076	-1.34083
	-3.76096	0.000249466	0.000279345	0.000268942	0.000239561	0.000306086	0.0002559	0.000274297	0.000236671	0.000274657	0.000291686	0.000258249	0.000263988	0.000274475	0.000288563	0.000274782	0.000288803	0.000256719	0.000236096	0.000264936	0.000255896		-3.76096	-9.19725e-06	2.34199e-05	5.96631e-05	2.83153e-05	4.11074e-05	6.85349e-05	8.24528e-05	5.99739e-05	6.12875e-05	3.54277e-05	0.000112498	4.00275e-05	2.80685e-05	3.92085e-05	5.90026e-05	7.32177e-05	3.23336e-05	1.29653e-05	3.4085e-05	2.09212e-05			3.7245	-5.86936	-1.18821	-1.87639
	-3.75072	0.000247918	0.000278465	0.000238077	0.000247433	0.000272309	0.000274646	0.00027173	0.000245593	0.000279323	0.00024957	0.000240827	0.000244847	0.000272302	0.000290698	0.00027641	0.000304994	0.000275051	0.000238695	0.000229289	0.000277959		-3.75072	2.50962e-05	2.22201e-05	9.24099e-05	3.1218e-05	6.32055e-05	6.12822e-05	4.35056e-05	6.39961e-05	4.23936e-05	6.11391e-05	7.47997e-05	6.04619e-05	6.71185e-05	3.62085e-05	5.11989e-05	6.2916e-05	3.05537e-05	5.30567e-05	2.93081e-05	3.41417e-05			3.75522	-6.60232	-2.06033	-1.90828
	-3.74048	0.000270104	0.000261643	0.000225324	0.000269129	0.000260438	0.000290212	0.000277756	0.000245187	0.000274275	0.000236866	0.000262017	0.000240298	0.000249058	0.00025001	0.000270297	0.000288516	0.000263125	0.000252043	0.000253987	0.000299909		-3.74048	5.7511e-05	6.04914e-05	4.99781e-05	3.31868e-05	7.61492e-05	4.71811e-05	3.12455e-05	8.40779e-05	3.03735e-05	4.83775e-05	4.49075e-05	6.55958e-05	9.70388e-05	2.7243e-05	7.60738e-05	5.5733e-05	3.07962e-05	5.52737e-05	3.05325e-05	6.24652e-05			3.78594	-7.03433	-2.74068	-2.16034
	-3.73024	0.000275395	0.000245343	0.000252675	0.000273911	0.000277996	0.000273029	0.000281402	0.000244541	0.000262428	0.00026963	0.000299382	0.000244144	0.000245933	0.000214031	0.000253149	0.000247143	0.000243043	0.000267592	0.000301532	0.000304078		-3.73024	5.79177e-05	9.3268e-05	-1.12444e-05	2.94023e-05	5.68205e-05	2.98488e-05	5.23966e-05	8.99583e-05	2.96975e-05	3.10835e-05	3.2552e-05	6.12864e-05	8.78798e-05	3.00519e-05	0.000101318	6.08507e-05	3.03698e-05	1.40436e-05	2.99808e-05	5.63105e-05			3.81666	-7.30692	-3.2622	-3.18229
	-3.72	0.000271873	0.000249344	0.000279747	0.000269781	0.000302026	0.000236344	0.000265136	0.000247339	0.000241813	0.000303847	0.000298179	0.000240577	0.000266329	0.000227034	0.000238171	0.000225074	0.000260315	0.000286857	0.000293903	0.000288809		-3.72	3.67153e-05	6.37825e-05	-2.01763e-05	2.56675e-05	1.72142e-05	1.94565e-05	6.04299e-05	5.91619e-05	3.05488e-05	4.02231e-05	3.06099e-05	6.24648e-05	6.41139e-05	2.60984e-05	6.96566e-05	6.20889e-05	2.74726e-05	-8.19068e-06	2.9911e-05	1.49593e-05			3.84738	-7.7704	-3.9687	-4.22395
	-3.70976	0.000294157	0.000270126	0.00026721	0.000277045	0.000302639	0.000248406	0.000244862	0.000240464	0.000218156	0.000306283	0.000256131	0.000244711	0.000273275	0.000265011	0.000238494	0.000243241	0.000314004	0.00030316	0.000226478	0.00027072		-3.70976	1.59575e-05	7.65528e-06	8.53197e-06	3.4337e-05	2.75019e-07	3.28583e-05	3.97847e-05	1.99199e-05	2.88374e-05	6.04392e-05	5.07347e-05	6.1014e-05	6.39343e-05	6.36943e-06	2.67359e-05	6.11275e-05	3.23352e-05	1.78606e-05	3.20451e-05	2.28411e-06			3.8781	-7.8999	-4.57702	-5.01621
	-3.69952	0.000330691	0.00028308	0.000241698	0.00027283	0.000272239	0.000320112	0.000250373	0.000234423	0.000215098	0.00027987	0.000225855	0.000272502	0.000253406	0.000278592	0.000251998	0.000262732	0.000348519	0.000301218	0.000181125	0.000254665		-3.69952	2.26555e-06	-2.29073e-06	2.63365e-05	5.29915e-05	2.76018e-05	5.79589e-05	2.99479e-05	1.46799e-05	3.13499e-05	5.70294e-05	8.93433e-05	5.32637e-05	8.42165e-05	-1.59655e-06	5.65541e-05	7.35702e-05	4.95015e-05	4.8199e-05	3.12594e-05	3.82413e-05			3.90882	-7.85762	-5.04087	-6.13004
	-3.68928	0.000336375	0.000276874	0.000251741	0.000224811	0.000237759	0.000367913	0.000271026	0.000254498	0.000243379	0.000244913	0.000237516	0.00030751	0.000245624	0.000273258	0.000268132	0.000243574	0.000326877	0.000281358	0.000215754	0.000241354		-3.68928	-5.69604e-06	2.63696e-05	3.3566e-05	6.16124e-05	6.9146e-05	5.93912e-05	5.05105e-05	4.28103e-05	3.58665e-05	3.12503e-05	9.81922e-05	6.33734e-05	9.08573e-05	2.02422e-05	0.000117459	9.20862e-05	6.23224e-05	3.93083e-05	3.22196e-05	6.36065e-05			3.93954	-8.21496	-5.56902	-6.97591
	-3.67904	0.000310099	0.000266255	0.000277392	0.00016326	0.000230006	0.000330968	0.000269642	0.000278529	0.000280117	0.000225573	0.00026423	0.000318419	0.000276918	0.00028526	0.000282866	0.000208023	0.000273435	0.000259283	0.000290393	0.000249449		-3.67904	-2.13327e-06	3.66024e-05	5.0703e-05	4.74746e-05	7.88372e-05	3.73247e-05	6.51393e-05	6.44997e-05	2.77303e-05	1.78452e-05	5.7487e-05	9.95947e-05	7.33705e-05	4.47019e-05	9.90943e-05	8.90011e-05	5.15814e-05	8.26477e-06	5.27155e-05	4.53921e-05			3.97026	-8.22877	-6.42413	-7.50132
	-3.6688	0.000286783	0.000272428	0.000262948	0.000161513	0.000251303	0.000264471	0.0002483	0.000261365	0.000288623	0.000244975	0.000274743	0.000301756	0.000313552	0.000304678	0.000298977	0.000215832	0.000238515	0.000245965	0.00032677	0.000289077		-3.6688	1.46041e-05	3.03068e-05	6.35571e-05	2.13142e-05	5.23419e-05	3.22534e-05	4.46198e-05	5.13031e-05	7.22677e-06	3.10657e-05	2.9105e-05	0.000123136	5.84763e-05	3.7909e-05	1.97654e-05	5.90637e-05	2.2902e-05	-2.29099e-06	8.77565e-05	2.90886e-05			4.00098	-8.08227	-6.44683	-7.98351
	-3.65856	0.00027605	0.000292246	0.000221533	0.000229374	0.000272885	0.000249623	0.000250013	0.000221049	0.000269312	0.000286429	0.00027151	0.000270519	0.000303808	0.000290743	0.000312333	0.000268908	0.000235455	0.000240764	0.00031087	0.000317235		-3.65856	2.97322e-05	4.45776e-05	4.85876e-05	2.71011e-06	2.87992e-05	5.2808e-05	1.7009e-05	1.55017e-05	1.57875e-06	4.31902e-05	5.88198e-05	9.91566e-05	6.09473e-05	1.44943e-05	-2.07283e-06	3.11094e-05	4.7186e-07	1.41421e-05	9.64369e-05	4.75168e-05			4.0317	-7.9394	-6.76518	-8.57443
	-3.64832	0.000259857	0.000305027	0.000220659	0.000295925	0.000271071	0.000283664	0.000288486	0.000220533	0.000260154	0.000305092	0.000273601	0.000239139	0.000256129	0.000251935	0.000310633	0.000306782	0.000249337	0.000243145	0.000285858	0.000286982		-3.64832	3.10585e-05	6.14068e-05	1.75106e-05	1.90013e-06	3.59065e-05	5.99161e-05	2.14749e-05	-6.16215e-06	3.03054e-05	2.88652e-05	9.1642e-05	5.43697e-05	5.68294e-05	2.16411e-05	4.67136e-05	3.21924e-05	4.46464e-06	2.95847e-05	5.63148e-05	6.34486e-05			4.06242	-8.02829	-6.83908	-8.61027
	-3.63808	0.000244579	0.000296377	0.000261289	0.000310717	0.000252032	0.000307888	0.000322666	0.000260195	0.000283205	0.000289095	0.000280663	0.000227227	0.000231747	0.00023323	0.000287306	0.000295255	0.000277898	0.000246726	0.000275767	0.000229112		-3.63808	3.02165e-05	3.86425e-05	-3.78519e-07	1.76267e-05	5.58654e-05	4.01297e-05	4.42108e-05	1.0603e-05	7.12674e-05	3.2388e-06	6.81149e-05	4.24331e-05	2.44599e-05	6.59018e-05	6.84764e-05	5.26983e-05	3.61296e-05	2.98157e-05	5.26739e-06	4.51537e-05			4.09314	-8.05178	-6.89757	-9.00935
	-3.62784	0.000250142	0.000275461	0.000271945	0.000300747	0.00024368	0.000300796	0.000315843	0.000277063	0.000307448	0.00027358	0.000276246	0.000252681	0.000261321	0.00024188	0.000253301	0.000272267	0.000318486	0.000244596	0.000264282	0.000215397		-3.62784	4.27886e-05	7.85574e-07	5.03566e-06	4.14287e-05	6.09561e-05	3.15464e-05	4.03651e-05	5.46584e-05	8.07251e-05	1.70918e-06	3.18601e-05	6.80298e-05	-1.35251e-05	9.33408e-05	3.85631e-05	6.0768e-05	7.15225e-05	2.98179e-05	-1.08673e-05	2.59821e-05			4.12386	-7.81789	-7.2301	-9.26941
	-3.6176	0.000273945	0.000255995	0.000232209	0.000302338	0.00025977	0.000282966	0.000278963	0.000253931	0.000298268	0.000265472	0.000248866	0.000293438	0.000301001	0.000247258	0.000225569	0.000271706	0.000328737	0.000246509	0.000245849	0.00024091		-3.6176	6.08827e-05	8.66007e-06	2.28131e-05	5.91209e-05	5.7815e-05	5.12678e-05	7.50303e-06	8.87565e-05	4.70256e-05	3.2113e-05	4.19711e-05	8.08734e-05	-1.65497e-05	6.27895e-05	2.81768e-05	4.49274e-05	7.58542e-05	3.67038e-05	-9.63633e-07	4.30697e-05			4.15458	-8.10787	-7.65418	-9.14507
	-3.60736	0.000294631	0.000244058	0.0002056	0.000303786	0.000282759	0.000271804	0.000248168	0.000241309	0.000275081	0.000237935	0.000214844	0.000302627	0.000295984	0.000244267	0.000213778	0.000273235	0.000281344	0.000271311	0.00023683	0.000231846		-3.60736	6.6318e-05	6.1838e-05	3.56993e-05	5.78759e-05	6.60536e-05	5.98216e-05	-5.36311e-06	8.3564e-05	7.19136e-06	6.52637e-05	6.13841e-05	4.88456e-05	1.97208e-05	6.77229e-06	5.55637e-05	2.89608e-05	5.011e-05	3.22587e-05	1.00253e-06	7.3931e-05			4.1853	-8.47675	-7.75105	-9.09883
	-3.59712	0.000305262	0.000238831	0.0002285	0.000285612	0.000284554	0.0002697	0.000244701	0.000263615	0.000280956	0.000205667	0.000206731	0.000269686	0.000257632	0.000245759	0.000219348	0.000254324	0.000236344	0.000296916	0.000243575	0.000174595		-3.59712	6.11693e-05	0.000100895	3.37282e-05	3.97598e-05	7.10978e-05	2.7769e-05	2.59072e-05	4.60695e-05	4.54479e-06	7.16852e-05	3.46119e-05	5.34461e-06	5.62635e-05	-1.69836e-05	6.29472e-05	3.87601e-05	4.36982e-05	1.06286e-05	-5.0168e-07	7.46512e-05			4.21602	-8.18145	-7.66967	-9.22127
	-3.58688	0.000299849	0.000244779	0.000257177	0.000264964	0.00026288	0.000279748	0.000267192	0.000284537	0.000304263	0.000221616	0.00024412	0.000235937	0.000240535	0.000244967	0.000239646	0.000245103	0.000267328	0.000277163	0.000248703	0.000148652		-3.58688	5.96572e-05	9.00104e-05	2.97588e-05	2.30535e-05	4.52572e-05	-1.23763e-05	5.9016e-05	1.46127e-05	3.9254e-05	5.83142e-05	7.19638e-09	7.42637e-06	5.46608e-05	-2.43916e-06	3.5958e-05	6.9418e-05	8.10076e-05	-2.31664e-07	2.19511e-05	4.23456e-05			4.24674	-7.87052	-7.42857	-9.7759
	-3.57664	0.000272311	0.000260456	0.000251806	0.000267096	0.000244314	0.000297759	0.000295518	0.000279203	0.000295569	0.000267908	0.000302186	0.000233413	0.000261142	0.000235086	0.000256724	0.000275271	0.000329193	0.000222781	0.000244241	0.000204828		-3.57664	6.11315e-05	4.26463e-05	4.83862e-05	2.44773e-05	7.08677e-06	-1.51817e-05	5.23412e-05	2.06928e-05	7.20541e-05	5.42203e-05	1.84516e-05	5.90488e-05	1.78383e-05	1.69726e-05	2.00266e-05	9.24964e-05	0.00010568	1.50528e-05	6.08074e-05	8.69685e-06			4.27746	-7.88127	-7.28122	-9.69193
	-3.5664	0.000241347	0.000275732	0.000234142	0.000287373	0.000249762	0.000305912	0.00030614	0.000268432	0.000256384	0.000267734	0.000336274	0.000250923	0.000288446	0.000242555	0.000247907	0.00031332	0.000316793	0.000213457	0.000239865	0.000287089		-3.5664	5.03887e-05	-3.44254e-06	7.88768e-05	4.21601e-05	6.13995e-06	1.29416e-05	3.17726e-05	5.16977e-05	7.25109e-05	6.34125e-05	6.28236e-05	0.000102795	-1.53461e-05	2.98024e-05	2.8959e-05	8.68069e-05	6.35557e-05	3.06047e-05	7.77614e-05	-4.95685e-06			4.30818	-7.37597	-7.2698	-9.74374
	-3.55616	0.000247015	0.000278816	0.000237859	0.000303612	0.000268492	0.000290166	0.000293055	0.00027197	0.000245988	0.00022264	0.000328143	0.00026643	0.000302534	0.00027794	0.000218504	0.000304929	0.000239373	0.000276714	0.000244338	0.000313752		-3.55616	2.82313e-05	-7.25615e-06	7.41856e-05	5.88851e-05	4.50691e-05	3.12143e-05	3.98884e-05	6.46682e-05	4.91649e-05	5.53098e-05	7.27901e-05	9.03041e-05	-1.17506e-05	4.54481e-05	3.44826e-05	5.46909e-05	5.31196e-06	2.80502e-05	6.03635e-05	-2.85342e-06			4.3389	-7.42277	-6.78338	-9.50444
	-3.54592	0.000284989	0.000273723	0.000257525	0.000300484	0.000277447	0.000260196	0.000276183	0.000278816	0.00028435	0.000221563	0.00030287	0.000281044	0.000304953	0.000305059	0.000211596	0.000257145	0.000207577	0.000336858	0.000247241	0.00028077		-3.54592	1.80894e-05	3.91823e-05	3.12234e-05	5.86324e-05	6.96541e-05	2.70466e-05	6.02035e-05	4.46328e-05	3.12882e-05	1.75835e-05	6.06701e-05	3.85875e-05	2.29527e-05	6.10698e-05	3.08153e-05	2.07779e-05	1.67388e-05	3.12235e-05	3.55748e-05	5.93887e-06			4.36962	-7.39832	-7.25671	-9.27289
	-3.53568	0.000305504	0.000271168	0.000272299	0.000280797	0.000275206	0.000241956	0.000271424	0.000276586	0.000316199	0.000279175	0.00028402	0.000298801	0.000286939	0.000295141	0.000251028	0.000231649	0.000252242	0.000322391	0.00024385	0.000247235		-3.53568	3.45778e-05	7.82852e-05	1.97404e-05	3.90876e-05	4.72425e-05	2.54465e-05	5.20717e-05	2.87537e-05	3.57956e-05	-1.00195e-05	7.19447e-05	2.26466e-06	5.54012e-05	7.31834e-05	3.24916e-05	1.51236e-05	7.66134e-05	5.31601e-05	3.11862e-05	2.2611e-05			4.40034	-7.40365	-7.10933	-8.99684
	-3.52544	0.000288867	0.000275707	0.000277046	0.000269072	0.000275277	0.000254628	0.000274431	0.000265887	0.000295204	0.000305493	0.000273361	0.000305185	0.000249562	0.000274155	0.00030318	0.000260127	0.000291859	0.000270762	0.000249538	0.000249841		-3.52544	5.80293e-05	5.07725e-05	7.52456e-05	1.3251e-05	7.89669e-06	3.74724e-05	3.13322e-05	5.12015e-05	5.46179e-05	1.50552e-05	9.34136e-05	5.76424e-06	6.41592e-05	9.26333e-05	3.12008e-05	4.57515e-05	9.05831e-05	6.03193e-05	4.6321e-05	4.62371e-05			4.43106	-6.93758	-7.09853	-9.33684
	-3.5152	0.0002732	0.000278637	0.000275998	0.000293115	0.00027661	0.000290594	0.000274248	0.000248503	0.000249524	0.000266147	0.000268921	0.000287551	0.000236924	0.000262495	0.000313087	0.000300173	0.000282371	0.00025529	0.000279247	0.000270674		-3.5152	5.91653e-05	-2.76541e-06	0.000123248	-4.69309e-08	-4.55102e-06	3.82497e-05	4.52328e-05	8.78687e-05	6.3477e-05	7.13198e-05	7.50769e-05	2.51298e-05	6.08002e-05	0.000109576	1.29388e-05	8.36161e-05	4.61079e-05	3.04421e-05	6.28394e-05	6.11394e-05			4.46178	-6.94085	-6.92959	-9.20034
	-3.50496	0.000276615	0.000271776	0.000265902	0.000336208	0.000265563	0.000314175	0.000274516	0.000226136	0.000236016	0.000241766	0.000276677	0.000263815	0.000274178	0.000241737	0.000275057	0.000296989	0.000267459	0.000277947	0.000308667	0.000273156		-3.50496	4.05458e-05	1.22694e-05	8.5779e-05	7.03759e-06	1.71112e-05	1.85147e-05	8.95797e-05	8.61612e-05	4.43112e-05	9.29311e-05	2.00439e-05	3.17655e-05	6.83903e-05	8.84603e-05	-2.07683e-08	8.80979e-05	2.16644e-05	-3.06047e-06	6.73787e-05	5.35087e-05			4.4925	-6.85934	-6.97901	-9.2403
	-3.49472	0.000270606	0.00025558	0.000247659	0.000342764	0.000247417	0.000293526	0.000277569	0.000213629	0.000265868	0.00027921	0.000283464	0.000264593	0.000306667	0.000211024	0.000228994	0.000258797	0.000273312	0.000287686	0.000300425	0.000250812		-3.49472	2.96047e-05	8.96097e-05	9.74007e-06	2.60143e-05	5.19556e-05	1.78812e-05	0.000112695	3.9235e-05	9.1601e-06	5.69532e-05	-1.28153e-05	2.91774e-05	8.78835e-05	3.16837e-05	2.23641e-05	5.26716e-05	4.9332e-05	-7.35555e-06	5.90826e-05	3.44566e-05			4.52322	-6.67916	-6.67647	-9.1601
	-3.48448	0.000247912	0.000240271	0.000235192	0.000294423	0.000244846	0.000242029	0.000274758	0.000222216	0.000300446	0.000315175	0.000269251	0.000289918	0.000275626	0.00021761	0.000213764	0.000240308	0.000268282	0.000270413	0.000261817	0.000230744		-3.48448	3.23275e-05	0.000122278	-2.50443e-06	4.55158e-05	7.45607e-05	6.01371e-05	9.22183e-05	-4.36014e-06	-4.84357e-06	1.77769e-05	8.83639e-06	3.6753e-05	9.3716e-05	-7.99822e-07	6.24939e-05	1.57463e-05	7.59987e-05	9.62164e-07	4.31984e-05	2.52578e-05			4.55394	-6.34103	-6.26279	-8.75542
	-3.47424	0.000248618	0.0002363	0.000241859	0.00024746	0.000266805	0.000211987	0.000258286	0.00024225	0.00029835	0.000295015	0.000246109	0.000306652	0.000220386	0.00027097	0.000235743	0.000261009	0.000247093	0.000250884	0.000243681	0.000239072		-3.47424	2.71436e-05	7.14385e-05	5.23358e-05	5.98983e-05	6.75639e-05	9.43394e-05	5.46719e-05	-2.926e-06	2.03762e-05	3.43478e-05	4.88199e-05	5.50123e-05	6.90334e-05	2.49857e-05	6.8057e-05	1.70921e-05	6.67888e-05	-5.18284e-07	2.77654e-05	2.89813e-05			4.58466	-6.28292	-6.23094	-8.98207
	-3.464	0.000283505	0.000251355	0.000254068	0.000250034	0.000294982	0.000231076	0.000243902	0.000251185	0.000257972	0.000260095	0.000247661	0.000294989	0.000212104	0.000306862	0.000278301	0.000284421	0.000251768	0.000242836	0.000261463	0.000264614		-3.464	8.11993e-06	1.809e-05	8.84077e-05	5.892e-05	4.03751e-05	6.56563e-05	3.00662e-05	3.25544e-05	5.56384e-05	8.7387e-05	6.14741e-05	6.62206e-05	3.47512e-05	6.67473e-05	2.61979e-05	4.85182e-05	5.18371e-05	2.15212e-06	2.31798e-05	3.91001e-05			4.61538	-6.31363	-6.30051	-9.05033
	-3.45376	0.000311018	0.000283555	0.000246476	0.000273268	0.000306325	0.000268076	0.000251291	0.000244753	0.0002207	0.000263312	0.000268337	0.000276805	0.000240356	0.000279629	0.000308539	0.000280932	0.000294521	0.000239844	0.000275282	0.000275484		-3.45376	1.12318e-07	1.91866e-05	6.58218e-05	3.47312e-05	2.87678e-05	9.80519e-06	2.45708e-05	6.05137e-05	6.05012e-05	0.000105058	5.65463e-05	6.35527e-05	2.81721e-05	7.41854e-05	-1.11234e-05	6.52642e-05	5.81779e-05	2.05405e-05	3.52209e-05	5.76895e-05			4.6461	-6.37839	-6.44435	-8.99574
	-3.44352	0.000309133	0.000315397	0.000220587	0.000266921	0.000288628	0.000274892	0.000276734	0.000238102	0.000232521	0.00028564	0.000273293	0.000276439	0.000249926	0.000237684	0.000301986	0.000267402	0.000326491	0.000248367	0.000259047	0.000261992		-3.44352	1.70045e-05	3.41767e-05	2.41342e-05	1.06414e-05	4.65347e-05	-1.83163e-06	3.13894e-05	5.66365e-05	3.67732e-05	6.66017e-05	6.61873e-05	5.82538e-05	5.07269e-05	5.76602e-05	5.10345e-06	4.83883e-05	6.79849e-05	3.08558e-05	5.43469e-05	7.49943e-05			4.67682	-6.59604	-6.37299	-8.9796
	-3.43328	0.000304781	0.000319424	0.000212857	0.000245121	0.000250453	0.000250603	0.00028868	0.000243989	0.000288189	0.000283604	0.000266194	0.000278642	0.000244159	0.00024435	0.000267293	0.000269842	0.000311637	0.000278642	0.000239811	0.00024553		-3.43328	3.64637e-05	2.95765e-05	7.72798e-07	2.71107e-05	6.15326e-05	2.50229e-05	3.713e-05	3.11019e-05	2.03672e-05	3.09686e-05	7.39901e-05	5.9826e-05	6.23639e-05	5.28627e-05	4.91222e-05	3.01492e-05	6.30242e-05	1.44797e-05	6.10691e-05	6.46016e-05			4.70754	-6.98129	-6.48643	-8.80709
	-3.42304	0.000308351	0.00028855	0.000240306	0.00024921	0.000223004	0.00023278	0.000271002	0.000249862	0.000332814	0.000259437	0.000286642	0.000254357	0.000249223	0.000284816	0.000241228	0.000281861	0.00027715	0.00031533	0.000240114	0.000233819		-3.42304	3.57531e-05	3.89863e-05	-6.39581e-06	7.50368e-05	4.88341e-05	3.56096e-05	2.85601e-05	7.35533e-06	2.77485e-05	4.29056e-05	4.79659e-05	6.39745e-05	3.69484e-05	6.54251e-05	5.93393e-05	4.02787e-05	5.64694e-05	-3.30423e-06	4.64725e-05	3.2644e-05			4.73826	-6.8319	-6.49576	-8.43782
	-3.4128	0.000297355	0.00025216	0.000274359	0.000273889	0.000239337	0.000240896	0.000245845	0.000243869	0.00032343	0.000244533	0.000327022	0.000218623	0.000245543	0.000295755	0.000239176	0.000280329	0.00027227	0.000322453	0.000244669	0.000215193		-3.4128	2.89681e-05	7.63451e-05	-2.21443e-07	9.24222e-05	3.14907e-05	2.99831e-05	9.2187e-06	5.87552e-08	3.83669e-05	6.37988e-05	2.17147e-05	6.28722e-05	1.55798e-06	8.15925e-05	3.50671e-05	5.91755e-05	6.05867e-05	1.01707e-05	2.16097e-05	2.89807e-05			4.76899	-6.90451	-5.97102	-7.96433
	-3.40256	0.000276558	0.000245244	0.000281371	0.00028221	0.000284939	0.00025241	0.000246352	0.000243912	0.000280754	0.000246116	0.000327984	0.00021771	0.000217026	0.00026032	0.000244866	0.000255398	0.000295717	0.000289517	0.000242102	0.00019739		-3.40256	4.42623e-05	9.59574e-05	2.66489e-05	5.83532e-05	3.15721e-05	4.32015e-05	-1.0719e-07	1.12039e-05	3.2666e-05	4.17934e-05	4.85166e-05	5.32458e-05	-5.22635e-07	9.59616e-05	3.49106e-05	5.83783e-05	5.80428e-05	4.12669e-05	3.38563e-06	6.7491e-05			4.79971	-6.48862	-5.54841	-8.16412
	-3.39232	0.000280894	0.000264987	0.000274581	0.000274598	0.000305726	0.000246288	0.000266009	0.000278397	0.000256965	0.000246179	0.000273849	0.000262984	0.000213016	0.000220232	0.000244174	0.000221037	0.000305926	0.000250601	0.000248796	0.000212841		-3.39232	7.81791e-05	7.5388e-05	6.22604e-05	3.0585e-05	3.12223e-05	6.094e-05	1.22876e-05	3.21565e-05	2.16527e-05	3.98703e-06	9.15351e-05	3.52204e-05	2.98781e-05	0.000100777	7.30388e-05	5.66445e-05	3.34269e-05	4.60276e-05	1.3433e-06	9.19608e-05			4.83043	-6.47697	-5.52766	-7.67409
	-3.38208	0.000302905	0.000280274	0.000284441	0.000272804	0.000277619	0.000234444	0.000274642	0.000325679	0.000271854	0.000238447	0.000229557	0.000308099	0.000262099	0.000217867	0.000244641	0.000206197	0.000286928	0.000249361	0.00026726	0.000255214		-3.38208	9.6228e-05	4.91044e-05	7.63743e-05	4.58319e-05	2.10814e-05	4.91131e-05	3.59866e-05	4.2294e-05	2.85014e-05	1.1654e-05	7.59595e-05	1.34488e-05	4.8547e-05	8.21255e-05	9.1551e-05	8.4515e-05	1.09448e-05	1.58555e-05	1.6868e-05	6.55221e-05			4.86115	-6.30582	-5.16082	-7.23084
	-3.37184	0.000295195	0.000277599	0.00030645	0.000274428	0.000244542	0.000241969	0.000269921	0.000333532	0.000290016	0.000240196	0.00024907	0.000309374	0.000305522	0.00025155	0.00024682	0.000232845	0.000274504	0.000285672	0.000276571	0.000274558		-3.37184	7.77578e-05	3.65568e-05	5.91507e-05	6.11931e-05	3.00188e-05	3.08912e-05	5.45864e-05	2.76847e-05	5.1479e-05	5.36001e-05	3.20496e-05	3.9322e-07	2.98831e-05	4.6327e-05	5.84e-05	0.000119265	2.8839e-05	-6.06606e-06	4.26168e-05	3.01054e-05			4.89187	-5.39163	-4.4736	-6.57586
	-3.3616	0.000256529	0.000272123	0.000303323	0.000261367	0.000249089	0.00026369	0.000279354	0.000297968	0.000276523	0.000258444	0.000299881	0.0002741	0.000285468	0.000285834	0.00024122	0.000282324	0.000290032	0.000313306	0.000274138	0.000254162		-3.3616	4.20475e-05	1.904e-05	3.48045e-05	4.32813e-05	5.98146e-05	4.38734e-05	6.24266e-05	3.93594e-06	6.17021e-05	5.88165e-05	5.0307e-05	6.63679e-06	9.65184e-07	2.68736e-05	2.36455e-05	0.000112919	7.54462e-05	1.46216e-05	6.06108e-05	2.62921e-05			4.92259	-4.68307	-4.06575	-5.85661
	-3.35136	0.000239402	0.000274155	0.000269954	0.000242517	0.000275139	0.000274655	0.000301439	0.00027279	0.000246519	0.00027372	0.000314703	0.000245449	0.000241847	0.000287699	0.00023581	0.000306317	0.000305194	0.000295356	0.000277148	0.000244896		-3.35136	2.25834e-05	2.48095e-07	3.17018e-05	3.10139e-05	6.06995e-05	6.13249e-05	6.27305e-05	1.7332e-06	3.89671e-05	1.14974e-05	0.000111079	2.78644e-05	1.14589e-06	4.39231e-05	3.72609e-05	6.9595e-05	9.186e-05	5.22354e-05	5.58241e-05	3.04066e-05			4.95331	-4.23546	-3.83469	-5.14819
	-3.34112	0.00026298	0.000270657	0.000251135	0.000236648	0.000282671	0.000269687	0.000300373	0.000276345	0.000243875	0.000271733	0.000286367	0.000248925	0.000233525	0.000260426	0.000254125	0.000282315	0.000292114	0.000253381	0.000279567	0.000276354		-3.34112	2.68364e-05	1.18418e-05	4.8666e-05	5.04731e-05	2.0045e-05	3.90667e-05	6.0522e-05	2.12336e-05	5.55472e-07	-1.91267e-05	0.00011092	4.87878e-05	2.37673e-05	7.29659e-05	7.28477e-05	3.59098e-05	5.09388e-05	6.01172e-05	3.66388e-05	2.21288e-05			4.98403	-3.84357	-2.97834	-4.19052
	-3.33088	0.000287002	0.000251676	0.000283127	0.000246032	0.000274062	0.000274405	0.000266144	0.000270898	0.000267263	0.000272382	0.000269459	0.000273037	0.000244582	0.00024065	0.000290339	0.000246954	0.000274142	0.000238164	0.000263042	0.000306681		-3.33088	3.48283e-05	4.9976e-05	6.26486e-05	6.03445e-05	5.79896e-07	4.28874e-07	5.98576e-05	3.02681e-05	-1.7489e-05	1.86309e-05	4.85643e-05	6.07582e-05	2.96513e-05	7.38988e-05	7.65418e-05	3.02459e-05	-1.92308e-06	3.91284e-05	3.0114e-05	3.41772e-05			5.01475	-3.38606	-2.49637	-3.36973
	-3.32064	0.000281307	0.000232864	0.000330441	0.000261555	0.00027206	0.00029577	0.000236	0.000246501	0.000274338	0.00029095	0.000291358	0.000285504	0.00023171	0.000256349	0.000307828	0.00024484	0.000273404	0.000254871	0.000244294	0.000294572		-3.32064	3.26035e-05	7.33167e-05	6.30226e-05	3.91912e-05	3.45819e-05	-1.52196e-06	6.24665e-05	1.43638e-05	9.82907e-07	8.17753e-05	2.77337e-05	6.46516e-05	1.0536e-05	4.52692e-05	4.79982e-05	3.2451e-05	-1.50226e-05	2.57836e-05	4.97295e-05	7.61662e-05			5.04547	-2.46462	-1.95392	-2.78873
	-3.3104	0.000258834	0.000237953	0.000329729	0.000276784	0.00027432	0.000304932	0.000235577	0.00024953	0.000253077	0.000305306	0.000309714	0.000275066	0.000211736	0.000292736	0.00029035	0.000272095	0.000274121	0.000255353	0.000252573	0.000272793		-3.3104	2.75023e-05	6.61903e-05	6.13127e-05	3.251e-05	6.15801e-05	3.17321e-05	6.41604e-05	-3.24654e-06	3.80469e-05	9.51418e-05	7.50621e-05	6.14526e-05	2.07509e-07	2.71693e-05	2.85231e-05	3.0787e-05	1.62569e-06	2.92968e-05	7.46131e-05	8.95192e-05			5.07619	-1.90832	-1.05529	-1.69053
	-3.30016	0.000244354	0.000261883	0.000278368	0.000271728	0.000261531	0.000278586	0.000250335	0.000288254	0.000244675	0.000292143	0.000278934	0.000262784	0.000221611	0.00030995	0.000262329	0.000287186	0.000266724	0.000220137	0.000272618	0.00028501		-3.30016	2.92435e-05	4.88554e-05	6.35699e-05	5.62056e-05	3.23206e-05	5.80585e-05	5.64645e-05	-3.89794e-06	6.20646e-05	5.66505e-05	0.00010458	4.85878e-05	1.57299e-05	4.20952e-05	3.80179e-05	3.05945e-05	7.08199e-06	2.96041e-05	7.13542e-05	4.14576e-05			5.10691	-1.13763	-0.145424	-0.582649
	-3.28992	0.000253912	0.000275358	0.00023694	0.000231666	0.000241205	0.000241864	0.000264857	0.000303928	0.000264067	0.000275052	0.000224623	0.00027521	0.000249017	0.000289445	0.000247111	0.000275503	0.000277924	0.000203599	0.000267442	0.000307548		-3.28992	3.34315e-05	3.39766e-05	5.85039e-05	5.66132e-05	-2.5135e-06	6.08438e-05	3.86497e-05	9.02233e-07	5.4517e-05	3.07074e-05	7.40431e-05	3.0244e-05	3.28672e-05	6.12524e-05	5.71159e-05	3.07242e-05	-7.67327e-07	2.7709e-05	3.62136e-05	-5.3021e-06			5.13763	-0.111294	0.894351	0.250275
	-3.27968	0.000293928	0.000263558	0.000235832	0.000186429	0.0002348	0.000230519	0.000284265	0.000268822	0.000274002	0.000283609	0.000206172	0.000299887	0.00025469	0.000253646	0.000241886	0.000263381	0.00030451	0.000252731	0.000246901	0.000286173		-3.27968	3.18116e-05	2.1962e-05	4.15551e-05	1.73251e-05	2.05852e-05	4.93575e-05	2.85386e-05	-5.68952e-07	2.73052e-05	4.59272e-05	4.25562e-05	2.10057e-05	3.30496e-05	5.22301e-05	5.92934e-05	2.80331e-05	8.22776e-06	4.23989e-05	3.74934e-06	1.64533e-05			5.16835	1.0443	2.05186	0.959526
	-3.26944	0.000332202	0.000246057	0.000246123	0.000190985	0.000247764	0.000246742	0.000302827	0.000237541	0.000254953	0.000304603	0.000234436	0.00030443	0.000240009	0.000239912	0.000241172	0.000274672	0.000300424	0.000323481	0.000248914	0.000229097		-3.26944	2.68217e-05	2.6507e-05	2.74715e-05	1.40618e-06	6.93121e-05	2.73858e-05	4.55307e-05	2.74108e-06	1.48197e-05	6.13156e-05	5.45744e-05	3.1968e-05	3.08435e-05	3.25025e-05	4.06786e-05	3.06341e-05	3.57234e-05	6.08172e-05	4.01254e-06	7.50039e-05			5.19907	1.77669	2.87931	2.10737
	-3.2592	0.000315208	0.000241849	0.000244521	0.00024377	0.000266125	0.000265661	0.000300584	0.000253794	0.000244559	0.000308377	0.000267247	0.000284778	0.000235548	0.000261013	0.00025106	0.000287875	0.000260177	0.00033583	0.000270748	0.000199018		-3.2592	2.89031e-05	5.71016e-05	2.64107e-05	3.73817e-05	6.78905e-05	3.08514e-06	7.54898e-05	1.95996e-05	3.59681e-05	4.58108e-05	7.55145e-05	5.3082e-05	3.43274e-05	3.70214e-05	2.15434e-05	3.72106e-05	4.55354e-05	4.79934e-05	2.5629e-05	8.90161e-05			5.22979	2.90127	3.50414	2.75675
	-3.24896	0.000253703	0.000244205	0.000245523	0.000281793	0.000275125	0.000275595	0.000281289	0.000285153	0.000262702	0.000305207	0.000275731	0.00027483	0.000248414	0.000296312	0.000268886	0.000273332	0.00024577	0.000288363	0.000273033	0.000226447		-3.24896	4.25053e-05	8.94034e-05	3.40221e-05	6.54464e-05	1.61533e-05	2.51514e-06	7.60029e-05	3.54412e-05	6.34185e-05	3.06292e-05	6.62509e-05	6.0897e-05	2.58685e-05	5.72912e-05	2.35543e-05	2.98149e-05	2.42629e-05	8.55248e-06	3.73531e-05	4.4451e-05			5.26051	3.94665	4.43088	3.71342
	-3.23872	0.000238786	0.000240953	0.000249669	0.00026707	0.000262692	0.000277115	0.000271224	0.000285889	0.000274334	0.000317883	0.000264629	0.000289488	0.000252592	0.000315562	0.000278679	0.000245026	0.000280487	0.000245966	0.00024944	0.000267988		-3.23872	5.94539e-05	8.99147e-05	4.88418e-05	4.59818e-05	-1.4652e-05	3.45214e-05	3.54662e-05	3.468e-05	5.58762e-05	4.5306e-05	4.12919e-05	4.59759e-05	4.82812e-06	6.25123e-05	4.40489e-05	8.05093e-06	1.18263e-05	-9.19897e-06	3.23508e-05	2.54445e-06			5.29123	4.99181	4.8306	4.45869
	-3.22848	0.000306122	0.000243078	0.000235285	0.000230667	0.000236125	0.000273518	0.00027456	0.000263815	0.000255595	0.000336234	0.000246919	0.000306921	0.000237674	0.000309597	0.00027635	0.00024582	0.000308559	0.000241821	0.000233182	0.000268746		-3.22848	6.6785e-05	6.39008e-05	6.94638e-05	2.91917e-05	1.32386e-05	6.54782e-05	4.4797e-07	2.95405e-05	1.85168e-05	6.13986e-05	3.06377e-05	2.90736e-05	3.8165e-06	5.94948e-05	5.98423e-05	5.24365e-07	4.34896e-05	2.05395e-05	2.67752e-05	5.86319e-06			5.32195	5.89659	5.77321	5.15012
	-3.21824	0.000365263	0.000259008	0.000213159	0.000212817	0.00022828	0.000270847	0.000268985	0.000247517	0.000244856	0.00033006	0.000232736	0.000307884	0.000231148	0.000290715	0.000272092	0.000271285	0.000292283	0.000254959	0.000241602	0.000232024		-3.21824	6.19682e-05	4.76957e-05	7.4004e-05	6.3053e-05	5.57276e-05	5.76251e-05	1.50041e-05	4.50064e-05	-1.42784e-06	4.67459e-05	3.31354e-05	3.76776e-05	3.66923e-05	7.39874e-05	5.95506e-05	1.78991e-05	8.6802e-05	6.80621e-05	2.94475e-05	2.79569e-05			5.35267	6.87293	6.13483	5.41645
	-3.208	0.000328085	0.000274283	0.000223639	0.000217318	0.000256609	0.000276688	0.000250046	0.000242199	0.000275566	0.000302095	0.000241282	0.000305009	0.000258728	0.000276278	0.000272992	0.000271766	0.000269219	0.000271425	0.000251762	0.000208691		-3.208	5.64069e-05	6.00591e-05	4.35674e-05	0.000106517	5.46058e-05	2.01869e-05	5.40498e-05	7.82346e-05	1.47861e-05	3.04765e-05	3.13698e-05	6.76055e-05	7.45723e-05	9.171e-05	5.86322e-05	3.08456e-05	8.48315e-05	9.14522e-05	3.9531e-05	2.58706e-05			5.38339	7.90066	6.41959	6.78647
	-3.19776	0.000246837	0.000274103	0.000261713	0.000233502	0.000281709	0.000281027	0.00023806	0.000242302	0.000313603	0.000279296	0.000276048	0.000307438	0.000297009	0.000272508	0.000281379	0.000234356	0.000270295	0.000292561	0.000245595	0.000225365		-3.19776	6.08697e-05	8.34121e-05	5.49275e-06	9.20659e-05	1.68494e-05	-3.97724e-06	5.60747e-05	9.54461e-05	3.49149e-05	5.44998e-05	2.42561e-05	7.99272e-05	9.11753e-05	7.63795e-05	7.2598e-05	1.65189e-05	4.57525e-05	8.31862e-05	5.86162e-05	5.08755e-06			5.41411	9.37421	6.80724	8.63764
	-3.18752	0.000226714	0.000274626	0.000276212	0.000252076	0.000260289	0.000268716	0.000241819	0.000246472	0.000304004	0.000274671	0.000304671	0.00030201	0.000300539	0.000274662	0.000300081	0.000213432	0.000274718	0.000305276	0.000236315	0.00025777		-3.18752	6.87373e-05	9.19195e-05	7.60587e-06	2.99215e-05	-2.86231e-06	6.00798e-06	1.32465e-05	8.08419e-05	3.41274e-05	9.67822e-05	2.95222e-05	5.03407e-05	8.95257e-05	3.65382e-05	9.00167e-05	-1.87322e-06	3.03276e-05	6.34087e-05	7.47017e-05	2.7771e-06			5.44483	11.1178	7.59432	10.9297
	-3.17728	0.000274836	0.000290434	0.000254143	0.000252854	0.000219653	0.000248154	0.000246882	0.000246811	0.000257075	0.000275809	0.00028848	0.000283074	0.000264732	0.000268378	0.000311627	0.000241963	0.000270928	0.000292863	0.000243105	0.000273601		-3.17728	6.12077e-05	7.94373e-05	4.63186e-05	-5.68913e-06	1.57366e-05	2.71616e-05	-1.39567e-05	6.24737e-05	3.14221e-05	9.80391e-05	5.71106e-05	8.43903e-06	7.44359e-05	1.64565e-05	8.76076e-05	8.28897e-06	5.15735e-05	4.69578e-05	6.33577e-05	2.30798e-05			5.47555	14.1668	8.15152	14.014
	-3.16704	0.000312048	0.00030536	0.000240512	0.000231997	0.000221345	0.000246663	0.000244994	0.000238419	0.000233778	0.000274022	0.000244743	0.000274617	0.000228573	0.000247241	0.000285372	0.000281641	0.000281856	0.000275161	0.000253535	0.000273687		-3.16704	3.0126e-05	6.0604e-05	6.79232e-05	1.88433e-05	3.85794e-05	2.73413e-05	1.66609e-05	6.49954e-05	4.77367e-05	5.02709e-05	9.14593e-05	4.10198e-06	4.69582e-05	2.83702e-05	6.59488e-05	3.68081e-05	6.0702e-05	3.17863e-05	3.35923e-05	3.05436e-05			5.50627	19.2287	9.21313	17.9895
	-3.1568	0.000304068	0.000295346	0.000262011	0.000230097	0.00026066	0.000265783	0.000242406	0.000238524	0.00025685	0.00027243	0.000233258	0.000291179	0.000215132	0.000227842	0.000230678	0.000287065	0.00030268	0.00028099	0.000244744	0.000274048		-3.1568	-8.89129e-07	5.2689e-05	4.59796e-05	5.6181e-05	3.77916e-05	7.36773e-06	6.54736e-05	6.67666e-05	6.79786e-05	6.43818e-06	0.00010505	3.90203e-05	2.87302e-05	4.02534e-05	5.07696e-05	4.50447e-05	3.97596e-05	1.33412e-05	3.01057e-05	1.03226e-05			5.53699	26.2037	11.2947	23.3292
	-3.14656	0.000282232	0.000272915	0.000287401	0.000271879	0.000275894	0.000274864	0.000243734	0.000258599	0.00027916	0.00027555	0.000276311	0.000308792	0.0002119	0.000241323	0.000210347	0.000268886	0.000299057	0.00030474	0.000220869	0.000272448		-3.14656	8.86071e-06	6.27827e-05	1.01405e-05	5.57831e-05	2.24064e-05	1.96095e-06	6.77772e-05	4.50798e-05	6.88365e-05	1.77085e-06	9.12185e-05	6.81986e-05	4.04328e-05	3.17975e-05	5.85448e-05	2.24973e-05	3.03816e-05	1.03555e-07	5.6636e-05	-5.00774e-06			5.56771	35.333	14.5426	29.9307
	-3.13632	0.000274362	0.00026537	0.000282682	0.000307053	0.00025274	0.000256677	0.00024432	0.000275122	0.000263008	0.000277813	0.000309669	0.000295592	0.000210963	0.000289507	0.000252531	0.000252566	0.00027772	0.000315159	0.000213752	0.000255362		-3.13632	6.80498e-05	8.27537e-05	-3.04881e-06	3.46209e-05	6.08183e-06	3.48428e-05	3.14239e-05	2.84332e-05	5.31738e-05	8.58624e-06	6.98567e-05	6.76172e-05	6.01271e-05	2.03892e-05	7.25713e-05	-1.30588e-07	5.12354e-05	6.36218e-06	6.09452e-05	1.49385e-05			5.59843	44.6077	18.7009	37.0613
	-3.12608	0.000273152	0.000276374	0.000258329	0.00028391	0.000245878	0.000238587	0.00024407	0.000263649	0.000241192	0.000271502	0.000268957	0.000259821	0.000220976	0.00033486	0.000302272	0.000240083	0.000280016	0.000304748	0.000230879	0.000227423		-3.12608	0.000124085	9.15283e-05	1.41814e-05	3.14584e-05	-3.1199e-06	7.89714e-05	2.5826e-05	4.61882e-05	3.65097e-05	-6.07595e-06	6.11221e-05	5.84376e-05	5.38716e-05	2.99363e-05	6.42379e-05	4.67224e-06	6.41473e-05	3.13691e-05	3.26172e-05	5.17811e-05			5.62915	52.2027	24.2249	44.3075
	-3.11584	0.000275418	0.000282567	0.000244646	0.000245821	0.000284829	0.000254857	0.0002444	0.00024526	0.0002557	0.000255174	0.000193774	0.00023932	0.000238603	0.000338166	0.000301867	0.000235462	0.000301434	0.000287788	0.000244205	0.000212568		-3.11584	0.000117179	6.8895e-05	5.00261e-05	3.45094e-05	1.41671e-05	8.11195e-05	6.84961e-05	6.36693e-05	2.70106e-05	-1.67556e-05	6.2893e-05	5.93119e-05	3.40395e-05	6.03502e-05	3.05451e-05	2.48773e-05	4.41452e-05	5.471e-05	3.23395e-05	6.50746e-05			5.65987	57.1632	31.7367	49.3607
	-3.1056	0.00028852	0.000271446	0.000245064	0.000261518	0.000324319	0.000294347	0.000244288	0.000251357	0.000277344	0.000239885	0.00018789	0.000255149	0.000251344	0.000304511	0.000275945	0.000252928	0.000299593	0.00027356	0.0002309	0.00022155		-3.1056	6.14488e-05	2.17657e-05	7.83625e-05	1.51023e-05	5.55811e-05	3.4756e-05	9.30884e-05	3.81709e-05	2.76084e-05	1.52229e-05	6.02696e-05	6.16427e-05	3.16247e-05	9.23008e-05	1.02401e-06	2.88784e-05	1.52241e-05	6.12198e-05	7.50388e-05	4.83518e-05			5.69059	59.0484	40.5072	51.3721
	-3.09536	0.000308465	0.000252685	0.000244675	0.000301797	0.000317197	0.000311347	0.000242385	0.000271611	0.000260093	0.000238257	0.000260462	0.000290244	0.000266782	0.000265349	0.000270354	0.000274495	0.000278187	0.000256618	0.000212441	0.000239444		-3.09536	2.86434e-05	-9.34882e-06	6.98418e-05	-2.26229e-06	7.01618e-05	-1.66835e-06	6.09275e-05	2.43927e-06	3.41146e-05	5.85808e-05	4.57663e-05	6.04418e-05	3.42341e-05	0.000104225	3.34621e-06	1.03607e-05	1.21845e-06	5.86896e-05	9.03594e-05	3.18718e-05			5.72131	57.8665	48.9892	50.8434
	-3.08512	0.000314719	0.000242868	0.00024568	0.000286282	0.000283828	0.000290154	0.00024387	0.000277277	0.000237905	0.000247843	0.000306649	0.000313418	0.000293379	0.000243293	0.000274765	0.000267574	0.000279442	0.000243262	0.000220251	0.000251872		-3.08512	4.48991e-05	7.95212e-06	3.40668e-05	2.12228e-05	3.59209e-05	1.61773e-05	3.06971e-05	1.35393e-05	3.33873e-05	5.09196e-05	2.80159e-05	6.3264e-05	1.52672e-05	9.05195e-05	3.00029e-05	-2.60696e-06	2.30065e-06	6.20476e-05	5.23518e-05	3.29641e-05			5.75203	54.6168	55.0504	48.2874
	-3.07488	0.00030027	0.000242766	0.000267234	0.000225317	0.00027239	0.000271041	0.000246945	0.00027441	0.000271375	0.000249749	0.000264238	0.000311662	0.000307673	0.000238566	0.000259053	0.00024643	0.00030118	0.000250822	0.000248252	0.000268122		-3.07488	6.26476e-05	4.92979e-05	2.52873e-05	5.79258e-05	2.01131e-05	5.44747e-05	5.62403e-05	5.55021e-05	2.87207e-05	8.93315e-06	2.22121e-05	6.4453e-05	-1.78315e-06	6.88046e-05	4.56567e-05	1.35603e-05	2.04544e-05	6.71454e-05	3.1029e-05	3.35255e-05			5.78275	49.7634	58.4043	44.1784
	-3.06464	0.000280512	0.000244078	0.000300266	0.000201144	0.000278598	0.000291847	0.000244313	0.000278573	0.000327863	0.000238374	0.000204492	0.000295675	0.000284569	0.000244959	0.000244088	0.000247998	0.000300787	0.000279559	0.000257862	0.000293214		-3.06464	4.7378e-05	5.85083e-05	6.39717e-05	4.96295e-05	7.26388e-05	5.74327e-05	9.16141e-05	7.24775e-05	4.71144e-05	6.8124e-06	3.44519e-05	5.59491e-05	1.99774e-05	6.13022e-05	2.99805e-05	4.52594e-05	5.10016e-05	5.86077e-05	5.51198e-05	1.7008e-05			5.81347	43.7955	57.7952	38.998
	-3.0544	0.000274373	0.000243278	0.000307811	0.000235368	0.00025725	0.000329245	0.000237182	0.000276458	0.000321972	0.000235424	0.000209219	0.000280095	0.000248859	0.000249171	0.000257019	0.000253951	0.000278788	0.000293531	0.000239288	0.000306179		-3.0544	2.65107e-05	2.3885e-05	9.29166e-05	6.59516e-06	0.00012269	3.47857e-05	7.28749e-05	6.2462e-05	8.80881e-05	4.72316e-05	5.30592e-05	5.52051e-05	5.67817e-05	6.49663e-05	2.94776e-06	6.16602e-05	6.38206e-05	3.8748e-05	5.66959e-05	7.61617e-07			5.84419	37.2284	55.3631	33.3152
	-3.04415	0.000277269	0.000244734	0.0002836	0.00027056	0.00020379	0.000329594	0.000244569	0.000254711	0.000260261	0.000255904	0.000256349	0.000266247	0.00024344	0.000242361	0.00027511	0.00022308	0.000276102	0.000265438	0.00022848	0.000292325		-3.04415	2.65476e-05	-5.4013e-06	6.03573e-05	-6.68048e-06	9.13297e-05	3.48239e-05	2.9972e-05	5.99754e-05	0.000100605	6.14716e-05	6.24716e-05	7.23597e-05	5.89713e-05	5.92511e-05	1.11416e-06	5.80866e-05	4.97328e-05	3.10622e-05	1.34773e-05	7.0302e-06			5.87491	31.1149	50.3178	27.6134
	-3.03391	0.000270229	0.000245786	0.000273167	0.000275347	0.00017879	0.000288335	0.000273854	0.000243456	0.00023142	0.000275359	0.000279557	0.00024992	0.000269262	0.000234535	0.000264252	0.000184126	0.000299443	0.00022213	0.000252416	0.000275691		-3.03391	3.10967e-05	8.81996e-06	4.52798e-06	2.51351e-05	3.50865e-05	5.69747e-05	2.93395e-05	6.18152e-05	5.63688e-05	3.78582e-05	6.19858e-05	7.25827e-05	3.42442e-05	4.12804e-05	3.20165e-05	5.7203e-05	5.31539e-05	4.66975e-05	5.27271e-06	2.72599e-05			5.90563	25.333	45.6438	22.0742
	-3.02367	0.000250739	0.000242256	0.00029628	0.0002718	0.000223712	0.00025568	0.000306915	0.000268448	0.000263458	0.000265611	0.000269423	0.000236669	0.000293893	0.000249381	0.00024214	0.000200946	0.000313457	0.000217414	0.000278619	0.000275941		-3.02367	2.82052e-05	4.12638e-05	-5.17364e-06	4.91188e-05	4.70092e-05	5.85503e-05	6.35187e-05	4.53514e-05	5.72637e-06	3.34653e-05	6.14534e-05	3.13582e-05	2.49404e-05	2.93784e-05	6.35962e-05	6.79216e-05	9.71866e-05	6.39252e-05	6.0907e-05	4.33151e-05			5.93635	19.6005	40.3797	16.6221
	-3.01343	0.000245758	0.00024063	0.000306524	0.000274602	0.000295819	0.000266421	0.000316836	0.000304381	0.000292616	0.000245526	0.000252596	0.000239377	0.000304622	0.000284665	0.000238217	0.000258526	0.000307036	0.000252639	0.000267055	0.000275793		-3.01343	3.5617e-05	4.5023e-05	2.80595e-05	3.33875e-05	8.95639e-05	3.55481e-05	7.74615e-05	3.05866e-05	4.55283e-06	5.63562e-05	6.24361e-05	-2.24113e-06	3.05858e-05	2.97689e-05	5.99971e-05	6.86199e-05	0.000124976	5.35219e-05	9.3976e-05	5.88914e-05			5.96707	14.7383	34.3636	12.018
	-3.00319	0.000276649	0.000247167	0.000264926	0.000267146	0.000318144	0.000296851	0.000302825	0.000313068	0.000280157	0.000250904	0.000239876	0.00025678	0.000302121	0.000307769	0.000244729	0.000280462	0.000300917	0.00027916	0.000241096	0.000264665		-3.00319	5.4762e-05	1.73308e-05	4.61092e-05	1.32057e-05	6.84748e-05	2.94401e-05	5.79794e-05	5.23777e-05	2.84287e-05	5.6423e-05	5.9964e-05	2.74497e-05	2.12329e-05	3.01742e-05	2.39334e-05	4.18459e-05	8.69158e-05	1.95915e-05	5.79438e-05	7.40864e-05			5.99779	10.7336	28.2396	8.12225
	-2.99295	0.000324511	0.000248559	0.000214489	0.00024542	0.000281121	0.000307043	0.000283935	0.000305091	0.000260518	0.000271417	0.000235776	0.000272508	0.000277908	0.000295729	0.000243083	0.000253534	0.000304489	0.000276444	0.000253969	0.000272484		-2.99295	6.17977e-05	-3.26552e-06	3.12369e-05	2.89221e-05	5.92234e-06	5.46962e-05	2.65697e-05	9.23468e-05	2.24544e-05	3.38994e-05	5.84082e-05	8.36268e-05	1.25077e-06	2.79946e-05	-4.75406e-06	6.86673e-06	3.42298e-05	-2.7693e-06	2.52852e-05	6.38525e-05			6.02851	7.54556	22.3692	4.65218
	-2.98271	0.000344333	0.000240143	0.000213292	0.000223714	0.000242824	0.000290728	0.000273148	0.000304651	0.000270444	0.000269732	0.000254998	0.000275502	0.000235239	0.000265524	0.000246012	0.000239101	0.000306087	0.000277458	0.000293764	0.000302744		-2.98271	5.84803e-05	1.10225e-05	1.87254e-05	6.01609e-05	-6.61641e-06	7.57472e-05	-4.63084e-06	9.71213e-05	5.89393e-07	3.75401e-05	6.42301e-05	8.72998e-05	-4.57608e-06	3.28825e-05	5.3071e-06	-4.54636e-07	4.15743e-05	6.01031e-06	4.59927e-05	2.38021e-05			6.05923	4.32977	17.2299	1.91415
	-2.97247	0.000319174	0.000252809	0.000244582	0.00021365	0.000242874	0.000275249	0.000261	0.000304729	0.000294915	0.000249172	0.000290845	0.000274315	0.000213532	0.000245554	0.000263754	0.000264898	0.000305127	0.00029758	0.000302653	0.000306103		-2.97247	6.68586e-05	4.71264e-05	3.1001e-05	6.13775e-05	2.81181e-05	6.54068e-05	-1.83255e-05	5.84105e-05	2.21411e-05	5.99222e-05	6.68123e-05	4.07295e-05	-8.59448e-08	3.74648e-05	4.05524e-05	2.31863e-05	8.80742e-05	2.56012e-05	6.16017e-05	-5.82202e-08			6.08995	1.82757	12.4592	-0.337376
	-2.96223	0.000282434	0.000303182	0.000245235	0.000219316	0.000254523	0.000281713	0.0002387	0.000289042	0.000305414	0.0002406	0.000308703	0.0002768	0.000236559	0.000246384	0.000275177	0.000288159	0.000306212	0.000302305	0.0002797	0.000265583		-2.96223	7.13539e-05	6.72228e-05	5.1433e-05	3.62696e-05	3.32055e-05	4.11566e-05	8.93196e-06	2.49905e-05	8.47928e-05	4.74727e-05	5.30571e-05	1.32526e-05	-1.93268e-06	2.34648e-05	6.52467e-05	3.72139e-05	9.85658e-05	3.03782e-05	2.54737e-05	2.40939e-05			6.12067	-0.371443	8.69112	-1.92678
	-2.95199	0.000276125	0.000340243	0.00021143	0.000245466	0.000244904	0.000302946	0.000216823	0.000273672	0.000295502	0.000244136	0.000290614	0.000276073	0.000274906	0.000262144	0.000260606	0.000279362	0.000305415	0.000268272	0.000279523	0.000244224		-2.95199	4.11963e-05	4.81061e-05	6.15548e-05	3.1167e-05	1.14184e-06	3.07003e-05	5.33023e-05	3.32339e-05	0.000112325	7.64963e-06	3.46348e-05	2.6867e-05	8.23377e-08	1.54114e-06	6.68234e-05	1.05627e-05	6.36587e-05	2.71228e-05	-1.09077e-05	6.15118e-05			6.15139	-1.97023	5.15068	-3.74678
	-2.94175	0.000297237	0.000310776	0.00020218	0.00027395	0.000229665	0.000307743	0.00021553	0.000273551	0.00027629	0.000240288	0.000259669	0.000262463	0.000285565	0.000281181	0.000238294	0.000264522	0.00030064	0.000229431	0.000303505	0.000276734		-2.94175	3.33748e-06	8.73297e-06	6.24639e-05	5.44993e-05	-5.4631e-06	3.29068e-05	5.63149e-05	5.88747e-05	6.65771e-05	-1.45699e-06	3.06933e-05	4.02292e-05	1.69886e-05	6.76792e-06	5.82135e-05	-2.47259e-05	3.41596e-05	3.75382e-05	7.14188e-06	6.93503e-05			6.18211	-3.37845	2.55269	-5.21633
	-2.93151	0.000306997	0.000254351	0.000251662	0.000272871	0.000244362	0.000278131	0.000232612	0.000273575	0.000255962	0.00024073	0.000244684	0.000245681	0.000273959	0.000284085	0.000234633	0.000271483	0.000305057	0.00022888	0.000291978	0.000305317		-2.93151	1.16375e-05	-6.41993e-06	6.1106e-05	5.99382e-05	3.09433e-05	3.10993e-05	1.70092e-05	5.90274e-05	1.24313e-05	2.4633e-05	3.30449e-05	3.22554e-05	3.09225e-05	4.2915e-05	4.4591e-05	-1.00313e-05	3.06007e-05	5.68507e-05	5.12074e-05	6.09735e-05			6.21283	-4.89835	0.761498	-6.18299
	-2.92127	0.000286809	0.000249584	0.000315972	0.000238759	0.000274537	0.000233553	0.000246797	0.000257645	0.000244264	0.000260739	0.00024491	0.000239803	0.000268719	0.000263392	0.000250936	0.000283445	0.00031458	0.00026333	0.000235945	0.000277407		-2.92127	5.15868e-05	1.99617e-05	6.02689e-05	2.57115e-05	6.29089e-05	2.56142e-05	9.82226e-07	3.70432e-05	2.89221e-05	3.83532e-05	2.49656e-05	2.45937e-05	2.83835e-05	6.7385e-05	2.17595e-05	4.51402e-05	3.13295e-05	5.88145e-05	6.72332e-05	6.23814e-05			6.24355	-5.63533	-1.50848	-7.10603
	-2.91103	0.00025619	0.000292162	0.000334452	0.000211828	0.000273334	0.000213642	0.000246711	0.000241989	0.000250138	0.000275464	0.000244523	0.000243794	0.00027536	0.000243661	0.000269239	0.000277032	0.000304269	0.000297483	0.000202932	0.000242664		-2.91103	6.14176e-05	5.51897e-05	6.15544e-05	-8.97851e-07	6.04145e-05	3.02947e-05	3.4942e-05	3.22284e-05	8.71887e-05	3.13129e-05	2.2845e-05	2.99396e-05	3.21806e-05	4.93283e-05	1.48671e-06	6.45928e-05	3.07633e-05	3.90547e-05	4.72539e-05	6.01374e-05			6.27427	-6.50046	-3.10365	-8.22971
	-2.90079	0.000242305	0.000315399	0.000303536	0.000220341	0.000234912	0.000225624	0.000243151	0.000241153	0.000275099	0.000259144	0.000246304	0.000244493	0.000278369	0.000250977	0.000274096	0.000263576	0.000267595	0.00030526	0.000227312	0.000264503		-2.90079	3.71393e-05	6.02005e-05	6.26393e-05	2.38526e-05	4.08268e-05	3.94316e-05	6.98782e-05	5.17686e-05	9.13374e-05	3.78297e-05	5.09722e-05	3.50897e-05	6.18146e-05	1.60997e-05	4.41451e-06	2.50143e-05	4.2899e-05	2.77488e-05	1.31888e-05	4.10509e-05			6.30499	-7.35173	-4.49199	-9.03239
	-2.89055	0.000257117	0.000307418	0.00026897	0.000249243	0.000213677	0.000244351	0.000243621	0.000244104	0.000300183	0.000243357	0.000265306	0.000244006	0.000273349	0.000270454	0.000258359	0.000272117	0.000243689	0.000285708	0.000259721	0.000309748		-2.89055	3.01325e-05	3.81715e-05	6.06892e-05	6.71473e-05	3.04021e-05	3.032e-05	6.92158e-05	6.07597e-05	3.12204e-05	5.91223e-05	8.69068e-05	3.0983e-05	9.57171e-05	1.6386e-05	2.41798e-05	-1.01543e-06	6.26037e-05	4.78716e-05	-1.3105e-05	3.08548e-05			6.33571	-7.67373	-5.40299	-9.49983
	-2.88031	0.000294413	0.000305637	0.00025247	0.000269005	0.000240962	0.000255258	0.000243548	0.000240986	0.000304689	0.000266175	0.000284442	0.000253989	0.000260043	0.00027387	0.000233573	0.000298076	0.000264403	0.000261953	0.000253396	0.000297278		-2.88031	5.38316e-05	1.63585e-05	5.98159e-05	6.45878e-05	3.96011e-05	5.43242e-06	5.81013e-05	4.36684e-05	3.65368e-07	5.93557e-05	8.43286e-05	1.77659e-05	0.000103272	5.02376e-05	2.94543e-05	3.15813e-05	6.92283e-05	7.62909e-05	-1.03418e-05	4.64789e-05			6.36643	-8.16694	-6.13066	-9.81578
	-2.87007	0.000318007	0.000307971	0.000240951	0.000275223	0.00027812	0.000276525	0.000242479	0.000248596	0.000288853	0.000302982	0.000261041	0.00027482	0.000240066	0.000271234	0.000230578	0.00030597	0.000310725	0.000265152	0.000230423	0.000230223		-2.87007	7.09251e-05	2.92561e-06	6.11249e-05	2.02434e-05	6.56294e-05	8.48302e-07	6.04253e-05	2.79191e-05	3.65416e-05	3.33926e-05	4.39494e-05	-1.17741e-07	8.82583e-05	6.78346e-05	1.00855e-05	6.13348e-05	5.94498e-05	7.20283e-05	2.44569e-05	6.3147e-05			6.39715	-8.41383	-6.60606	-9.81715
	-2.85983	0.00028893	0.00028783	0.000234472	0.000275791	0.000272523	0.000312818	0.000246025	0.000279251	0.000273261	0.000302661	0.000205505	0.000285462	0.000229966	0.000282211	0.000263829	0.000277266	0.000337005	0.000294674	0.000234954	0.000192424		-2.85983	6.45322e-05	-7.22344e-06	4.96057e-05	4.34524e-06	9.02468e-05	3.12759e-05	5.76595e-05	2.99214e-05	6.07264e-05	1.73368e-05	9.49864e-06	-2.2836e-06	7.14661e-05	4.12135e-05	-3.42002e-06	3.32155e-05	4.35142e-05	3.96424e-05	5.75558e-05	6.26296e-05			6.42787	-8.66743	-7.1479	-10.0641
	-2.84959	0.000232191	0.00027253	0.000251509	0.000273602	0.00023751	0.000336567	0.000247351	0.000316852	0.000261262	0.000275803	0.000199695	0.000273485	0.000252517	0.000283628	0.00030047	0.000244435	0.000333971	0.000309407	0.000268811	0.000226367		-2.84959	5.13357e-05	-3.86712e-06	2.22687e-05	4.48143e-05	8.89024e-05	6.35839e-05	3.83743e-05	2.77346e-05	2.54524e-05	2.95406e-05	2.7649e-07	3.34068e-05	5.78353e-05	5.34558e-06	1.55015e-05	1.03698e-07	2.82631e-05	2.67918e-05	5.61634e-05	6.2093e-05			6.45859	-9.25252	-7.41893	-10.0995
	-2.83935	0.000232899	0.000299566	0.00027506	0.000270946	0.000225728	0.000325454	0.000239213	0.000335994	0.000239887	0.000274041	0.000273174	0.000250924	0.000292132	0.000249276	0.000296928	0.000246802	0.000328582	0.000283034	0.000300647	0.000272694		-2.83935	3.51566e-05	2.37693e-05	1.32018e-05	7.71045e-05	5.78772e-05	6.8331e-05	3.00105e-05	9.02581e-06	1.28683e-07	4.34134e-05	-9.20746e-07	8.25768e-05	4.1612e-05	3.76893e-06	4.46558e-05	2.33683e-05	2.22737e-05	4.33878e-05	3.49113e-05	6.68527e-05			6.48931	-9.54688	-7.69061	-10.0031
	-2.82911	0.000310008	0.000334097	0.000267699	0.00027852	0.000252229	0.000302242	0.000237292	0.000331474	0.000214621	0.000304935	0.000334349	0.000244604	0.000303246	0.000214935	0.000258896	0.000275448	0.000338547	0.00024833	0.000304723	0.00026747		-2.82911	9.70675e-06	5.74466e-05	4.45857e-05	4.46126e-05	2.40865e-05	6.03118e-05	4.99109e-05	-7.84188e-07	3.40801e-05	3.08439e-05	-1.16667e-06	8.99044e-05	2.73567e-05	2.54015e-05	4.18255e-05	6.18917e-05	3.48317e-05	3.94986e-05	2.71976e-05	5.56186e-05			6.52003	-9.35519	-7.7966	-10.0748
	-2.81887	0.000366195	0.000319478	0.000243224	0.000296588	0.000276902	0.000297771	0.000256478	0.00031438	0.00021728	0.000314422	0.000304506	0.000259935	0.000270933	0.000228344	0.000231842	0.00027933	0.000345528	0.000247226	0.000281766	0.000239364		-2.81887	-1.84992e-06	6.94421e-05	7.17617e-05	-2.83783e-06	1.71085e-05	6.00484e-05	6.76087e-05	1.64845e-05	6.22563e-05	4.2897e-06	9.37536e-06	5.16765e-05	2.49253e-05	3.39018e-05	1.41816e-05	5.41045e-05	5.4821e-05	1.91179e-07	3.09712e-05	3.32561e-05			6.55075	-9.31823	-8.17595	-10.0841
	-2.80863	0.000323801	0.000278169	0.000254128	0.000305866	0.000269198	0.000306212	0.000275005	0.000299884	0.000251606	0.000272383	0.000248098	0.000275751	0.000234119	0.000267327	0.00023772	0.000240234	0.000328299	0.000270286	0.000252853	0.000255847		-2.80863	3.0342e-05	6.22438e-05	4.39095e-05	1.60219e-05	3.82501e-05	6.09024e-05	4.79763e-05	3.83576e-05	3.08755e-05	5.50233e-07	2.76794e-05	3.09772e-05	3.50001e-05	3.04031e-05	1.64775e-05	2.97185e-05	6.12432e-05	-8.24513e-06	2.21856e-05	3.51976e-05			6.58147	-9.30224	-8.2491	-10.2659
	-2.79839	0.000248877	0.000264612	0.0002941	0.000290176	0.000247641	0.000296731	0.000265019	0.000299554	0.000277749	0.000219581	0.000257515	0.000266953	0.000230069	0.000279382	0.000252155	0.00020254	0.000293589	0.000280592	0.000243068	0.000299732		-2.79839	8.68128e-05	5.77669e-05	-1.61257e-07	7.64224e-05	5.98475e-05	5.79041e-05	6.12656e-06	3.77284e-05	-4.82595e-06	3.00181e-05	4.29271e-05	6.17653e-05	5.07613e-05	3.46788e-05	6.36255e-05	4.08856e-05	5.83407e-05	4.83673e-05	2.88378e-06	5.808e-05			6.61219	-9.09589	-8.29164	-10.6116
	-2.78815	0.000245487	0.000274211	0.000300918	0.000265091	0.000246844	0.000266257	0.000245501	0.000310921	0.000265092	0.00021551	0.0003019	0.000237916	0.000255881	0.000273564	0.000248582	0.000218818	0.000269319	0.000275464	0.000255789	0.000293951		-2.78815	0.000113545	6.1037e-05	1.6955e-05	8.66016e-05	5.7529e-05	6.38417e-05	-8.05701e-06	2.45426e-05	8.82479e-06	6.33148e-05	5.9002e-05	9.50474e-05	6.78605e-05	3.41287e-05	9.49682e-05	6.24872e-05	6.40605e-05	9.25005e-05	-6.08041e-06	5.43501e-05			6.64291	-9.22913	-8.12627	-10.9756
	-2.77791	0.000302015	0.000273172	0.000262669	0.000262647	0.000265277	0.000243025	0.000251157	0.000313053	0.000236524	0.000252968	0.000301907	0.000214688	0.000288941	0.000288276	0.000234894	0.000274554	0.000268434	0.000274288	0.000273062	0.00023651		-2.77791	9.38541e-05	6.21652e-05	7.67398e-05	4.40603e-05	3.83858e-05	7.1439e-05	2.77233e-05	2.49134e-05	3.74479e-05	7.0948e-05	7.3664e-05	7.38409e-05	8.43387e-05	1.2066e-05	6.72819e-05	5.02319e-05	6.84418e-05	5.63491e-05	-1.17385e-06	1.61645e-05			6.67363	-9.19005	-7.91335	-10.9629
	-2.76767	0.000328107	0.000274413	0.000235378	0.000288262	0.000276893	0.000248308	0.000271208	0.000288977	0.000230611	0.000275024	0.000275835	0.000215975	0.000313836	0.000306103	0.000238384	0.000306534	0.000277278	0.000275392	0.000277846	0.000211135		-2.76767	6.48075e-05	6.12557e-05	8.54462e-05	3.47132e-05	3.03072e-05	5.1829e-05	8.04084e-05	3.70447e-05	4.96434e-05	5.96599e-05	6.35422e-05	1.71754e-05	9.56838e-05	-1.80524e-06	3.14675e-05	2.86677e-05	5.47564e-05	2.60741e-06	8.73094e-06	-1.1242e-06			6.70435	-9.06505	-7.51212	-10.6883
	-2.75743	0.000305549	0.000294403	0.000241099	0.000308011	0.000275038	0.000268026	0.000274023	0.00025358	0.000254407	0.000258507	0.000274925	0.00023316	0.000316085	0.000277751	0.000266147	0.000281709	0.000277154	0.000261786	0.000274901	0.000249438		-2.75743	6.11579e-05	6.30722e-05	2.68269e-05	7.66201e-05	4.61556e-05	1.24562e-05	9.92902e-05	3.66127e-05	7.08589e-05	5.4989e-05	2.56953e-05	-1.16466e-05	9.61788e-05	2.39729e-05	5.04241e-05	3.96905e-05	4.78423e-05	1.65965e-05	2.80797e-05	3.44479e-05			6.73507	-8.83437	-7.36435	-10.4233
	-2.74719	0.000289754	0.00030502	0.00024012	0.00029245	0.000275773	0.000273424	0.000271687	0.000241356	0.000287929	0.000243505	0.000275195	0.000246503	0.000288935	0.000219934	0.000299373	0.000234571	0.000274534	0.000244789	0.000273575	0.000288422		-2.74719	7.08837e-05	6.10671e-05	-1.46443e-05	9.10938e-05	7.23108e-05	2.23855e-06	7.23916e-05	2.13202e-05	9.63485e-05	6.30019e-05	1.82885e-07	1.0006e-05	8.59274e-05	5.88813e-05	8.93799e-05	6.59437e-05	7.64784e-05	5.95755e-05	6.11247e-05	7.96407e-05			6.76579	-8.40206	-7.23174	-10.2995
	-2.73695	0.000305918	0.000285724	0.000218694	0.000256342	0.000278408	0.000255912	0.000290029	0.000263105	0.000312693	0.000258488	0.000246649	0.000246414	0.000253258	0.000201348	0.000316159	0.000210836	0.000289724	0.000249521	0.000274651	0.000283707		-2.73695	6.03778e-05	4.709e-05	9.72345e-06	4.89397e-05	8.95365e-05	3.65902e-05	3.57083e-05	2.1538e-05	7.85356e-05	6.75452e-05	1.0753e-05	4.72065e-05	6.97885e-05	5.68321e-05	7.17159e-05	7.04372e-05	0.000102185	4.719e-05	9.10164e-05	7.88542e-05			6.79651	-8.4535	-7.07877	-10.4424
	-2.72671	0.000317942	0.000275023	0.00021849	0.000236323	0.000266619	0.000240369	0.000306432	0.000288278	0.000315504	0.000276518	0.000244622	0.000244211	0.000243317	0.000239674	0.000309182	0.000216866	0.000316412	0.000273821	0.000273594	0.000267825		-2.72671	2.45971e-05	2.9597e-05	5.75908e-05	2.45254e-05	8.96848e-05	7.15766e-05	2.77354e-05	5.39679e-05	3.57831e-05	5.79969e-05	3.08533e-05	6.39393e-05	5.16165e-05	3.2368e-05	9.34131e-06	5.737e-05	6.87631e-05	1.16792e-06	9.92514e-05	3.65893e-05			6.82723	-8.47599	-7.17806	-10.4356
	-2.71647	0.00030321	0.000294666	0.000257794	0.00024058	0.000247353	0.000254533	0.00028425	0.000283142	0.000291947	0.000264061	0.000300031	0.000257336	0.000263732	0.000270621	0.000274781	0.000232613	0.000318276	0.00028552	0.000274678	0.000271137		-2.71647	-6.04315e-07	2.34438e-05	8.59539e-05	6.71529e-05	7.30153e-05	7.18525e-05	4.67107e-05	8.82109e-05	4.13776e-05	4.07941e-05	4.12075e-05	6.23912e-05	3.50444e-05	2.52294e-05	-1.57221e-05	4.31962e-05	9.89644e-06	-2.16573e-06	9.18786e-05	2.3691e-06			6.85795	-8.14311	-7.01909	-10.1673
	-2.70623	0.000280265	0.000303967	0.000292838	0.000246432	0.000247497	0.000290666	0.000247807	0.000253985	0.000257339	0.00023775	0.000335504	0.000286089	0.000284008	0.000246284	0.000220601	0.000249266	0.000287217	0.000274493	0.000277398	0.000275921		-2.70623	1.89464e-05	3.22486e-05	9.89549e-05	0.000118893	4.82029e-05	5.22215e-05	6.11354e-05	8.30979e-05	8.46647e-05	2.81382e-05	6.32611e-05	6.16503e-05	2.97667e-05	3.05573e-05	2.31806e-05	2.35408e-05	1.10389e-05	3.09435e-05	8.06777e-05	9.41438e-06			6.88867	-7.97775	-6.85089	-9.53972
	-2.69599	0.0002752	0.000272083	0.000284727	0.000244081	0.000267153	0.000309694	0.000245393	0.000240811	0.000237055	0.000232519	0.000291442	0.000305877	0.000280943	0.000204115	0.000183846	0.000265992	0.000268417	0.000264419	0.000274215	0.000273175		-2.69599	6.7101e-05	4.83359e-05	9.7924e-05	0.000108943	3.21688e-05	3.634e-05	5.21838e-05	4.2778e-05	7.98661e-05	2.65855e-05	9.48525e-05	6.30273e-05	4.78849e-05	2.73576e-05	7.35851e-05	2.79581e-06	7.00024e-05	4.1243e-05	5.98499e-05	4.6883e-05			6.91939	-7.62451	-6.72587	-9.32985
	-2.68575	0.000288969	0.000241564	0.000252192	0.000248847	0.000278908	0.0002942	0.000271475	0.000264383	0.000238672	0.000251077	0.000241738	0.000298967	0.000262108	0.000213658	0.000208656	0.000277504	0.000290696	0.000275636	0.000260049	0.000282719		-2.68575	8.71992e-05	6.33616e-05	7.06347e-05	5.64311e-05	3.19453e-05	2.63927e-05	3.27085e-05	7.33349e-06	2.12886e-05	3.2753e-05	8.82738e-05	5.88442e-05	8.65034e-05	3.06426e-05	9.19043e-05	3.48328e-06	0.000101039	3.0247e-05	2.5081e-05	7.6468e-05			6.95011	-7.42638	-5.97279	-9.11252
	-2.67551	0.00030793	0.00025313	0.000240543	0.000268283	0.000275812	0.00027431	0.000283815	0.00029986	0.000251326	0.000269153	0.000264178	0.000280123	0.000246822	0.000270068	0.000274327	0.00027825	0.000310694	0.000286977	0.000242411	0.000302044		-2.67551	5.23364e-05	6.92203e-05	3.62676e-05	2.91367e-05	3.30469e-05	2.53395e-05	2.42738e-05	-1.12101e-06	-6.6008e-06	3.47169e-05	3.50068e-05	5.71557e-05	0.000118944	5.1957e-05	8.19901e-05	2.28011e-05	7.50826e-05	3.90374e-05	-1.31417e-06	7.03768e-05			6.98083	-7.65828	-5.51742	-9.10638
	-2.66527	0.000313975	0.000277904	0.000263809	0.000283784	0.000274932	0.000282873	0.000275707	0.000306968	0.000267603	0.0002758	0.000309255	0.000273127	0.000241327	0.000305577	0.000305412	0.000270468	0.000282313	0.000271761	0.000225174	0.000301013		-2.66527	5.55164e-06	5.66878e-05	2.69758e-05	4.48609e-05	2.46749e-05	4.04275e-05	2.99296e-05	7.76252e-06	1.95156e-05	2.72942e-05	-2.32658e-06	6.65856e-05	0.000114756	6.09407e-05	6.20218e-05	3.17902e-05	4.99325e-05	6.34006e-05	5.03249e-06	4.04732e-05			7.01155	-6.97152	-5.20955	-9.1653
	-2.65503	0.000300846	0.000267995	0.000298818	0.00027881	0.000276651	0.000303604	0.000262666	0.000280933	0.000281571	0.000276236	0.00029122	0.000274667	0.0002426	0.000290739	0.000273655	0.000255385	0.000244788	0.000244094	0.000212401	0.000279849		-2.65503	4.63088e-06	2.43547e-05	3.15787e-05	6.16544e-05	2.44767e-05	5.82698e-05	3.50057e-05	2.58551e-05	3.31025e-05	2.40359e-05	1.11548e-05	6.89253e-05	7.46698e-05	4.17147e-05	4.91107e-05	2.81937e-05	5.72053e-05	7.02874e-05	3.51797e-05	2.72175e-05			7.04227	-6.9518	-5.24042	-8.77501
	-2.64479	0.000281361	0.000236464	0.000315798	0.000259824	0.000264582	0.000294859	0.00024498	0.000251596	0.000279934	0.000271336	0.000233429	0.000274732	0.00025062	0.000274505	0.000244114	0.000233568	0.000265151	0.000247407	0.00021812	0.000268813		-2.64479	4.23494e-05	-5.41433e-06	1.84976e-05	4.96579e-05	5.18707e-05	6.06177e-05	3.09181e-05	5.63815e-05	8.62406e-06	3.86723e-05	3.3131e-05	4.78698e-05	3.5216e-05	3.10418e-05	6.14794e-05	3.72717e-05	6.06077e-05	5.91875e-05	5.80939e-05	5.11809e-05			7.07299	-6.80406	-5.33192	-8.18087
	-2.63455	0.000273904	0.000228824	0.000308288	0.000245561	0.000246499	0.000256665	0.000228178	0.000243713	0.000264583	0.000255246	0.000217108	0.000290005	0.000269028	0.000291039	0.000268053	0.00021558	0.000323587	0.000284084	0.000251631	0.000273846		-2.63455	6.2445e-05	1.70549e-06	4.44479e-07	3.15641e-05	8.69261e-05	5.87611e-05	2.52572e-05	8.8821e-05	-2.07674e-06	5.80764e-05	3.07692e-05	2.89516e-05	2.80728e-05	4.95384e-05	8.94286e-05	5.69777e-05	3.84918e-05	4.52603e-05	6.05745e-05	8.66041e-05			7.10371	-6.57713	-5.20645	-7.94301
	-2.62431	0.000274705	0.000252888	0.000289475	0.000242252	0.000247238	0.00023528	0.000244415	0.000247637	0.000266562	0.000236007	0.000256249	0.000327842	0.000291294	0.000304777	0.000306386	0.000217089	0.00033676	0.00030567	0.000281369	0.000269377		-2.62431	4.47592e-05	4.54109e-05	1.49792e-05	3.89078e-05	8.64194e-05	6.80965e-05	3.07233e-05	9.48582e-05	2.24487e-05	5.81679e-05	3.38565e-05	4.15883e-05	3.98097e-05	6.08728e-05	9.06803e-05	5.8545e-05	1.99413e-05	2.62036e-05	5.67809e-05	9.36517e-05			7.13443	-6.34171	-5.02432	-7.83464
	-2.61407	0.00027462	0.000273614	0.000275713	0.000243974	0.000268692	0.000260051	0.00028953	0.000244894	0.000296389	0.00023504	0.000295948	0.000344721	0.000304325	0.000277222	0.000301141	0.000235732	0.000288913	0.000278564	0.00026654	0.000248392		-2.61407	2.8501e-05	7.33077e-05	5.60728e-05	5.93934e-05	4.32324e-05	6.8245e-05	4.78676e-05	6.50374e-05	3.50176e-05	4.01078e-05	5.6432e-05	6.14015e-05	3.44844e-05	4.27028e-05	4.67178e-05	3.95312e-05	2.62707e-05	4.80455e-06	6.43867e-05	6.77042e-05			7.16515	-6.35024	-4.83861	-7.64661
	-2.60383	0.000285622	0.000271978	0.000272003	0.000243149	0.000289892	0.000301479	0.000304267	0.000236927	0.000310631	0.000256405	0.000305024	0.000304678	0.000304291	0.000238467	0.000272231	0.000249597	0.000249805	0.000235014	0.000223639	0.000232425		-2.60383	4.39178e-05	4.5989e-05	7.85378e-05	5.7477e-05	-4.13729e-07	3.7346e-05	6.15677e-05	3.07681e-05	9.50653e-06	2.23138e-05	5.64625e-05	5.05923e-05	1.45069e-05	3.08116e-05	-3.91486e-06	2.22082e-05	4.35468e-05	1.61556e-06	8.23992e-05	3.88464e-05			7.19587	-6.0819	-4.59132	-7.41406
	-2.59359	0.000318235	0.000267802	0.000274573	0.000243586	0.000303149	0.000310842	0.000258753	0.000243351	0.00027284	0.000273903	0.000301986	0.000251875	0.000304516	0.00023193	0.000266144	0.000246692	0.000266287	0.000225801	0.000218741	0.000240802		-2.59359	6.85847e-05	2.71174e-06	6.37466e-05	3.33077e-05	-4.2669e-06	3.5244e-06	5.38663e-05	2.97497e-05	-1.59492e-05	7.32801e-06	1.90854e-05	3.06936e-05	2.47237e-05	4.8421e-05	-1.7634e-05	7.8261e-06	5.84891e-05	1.85238e-05	9.28298e-05	3.03124e-05			7.22659	-6.29433	-4.01021	-7.1993
	-2.58335	0.000341696	0.000282503	0.000268275	0.00025343	0.000310699	0.0002797	0.000210802	0.000263623	0.000220628	0.000270868	0.000307923	0.000247479	0.000309318	0.000247456	0.000275229	0.000244225	0.000302146	0.00025363	0.000269345	0.000270028		-2.58335	6.98041e-05	1.19756e-05	3.78012e-05	2.00869e-05	2.66525e-05	5.82782e-06	2.79239e-05	5.45718e-05	-6.2561e-06	-8.09253e-06	-1.15681e-06	4.22402e-05	7.87645e-05	6.17195e-05	4.5441e-06	-1.17063e-05	6.86416e-05	3.42107e-05	7.95538e-05	3.43577e-05			7.25731	-6.25127	-4.20219	-6.93812
	-2.57311	0.000322539	0.000301746	0.000245348	0.000273316	0.000307101	0.000247374	0.00021568	0.000274673	0.000211513	0.000269432	0.000311566	0.000271632	0.000306339	0.00025024	0.00026393	0.000263693	0.000307777	0.000275707	0.000314794	0.000302774		-2.57311	5.57106e-05	6.78026e-05	3.03964e-05	2.96701e-05	5.82533e-05	2.79418e-05	1.36601e-05	6.12763e-05	2.05181e-05	-7.75574e-06	3.17952e-05	6.21368e-05	0.000121561	4.55437e-05	3.76438e-05	-1.13687e-05	6.4113e-05	4.63034e-05	5.29919e-05	3.16543e-05			7.28803	-5.4951	-3.94048	-6.60597
	-2.56287	0.000284546	0.000303417	0.000225953	0.000285244	0.000289171	0.00024724	0.000248088	0.000261815	0.000239082	0.000285032	0.000297571	0.00026744	0.000289766	0.000241758	0.000239982	0.000290479	0.000286034	0.000270593	0.000302321	0.000310514		-2.56287	5.53305e-05	9.87768e-05	4.34662e-05	3.84013e-05	6.80627e-05	2.58078e-05	3.60881e-05	3.12949e-05	3.11095e-05	1.63518e-05	7.46786e-05	4.2264e-05	9.81038e-05	2.75046e-05	6.58133e-05	3.31955e-05	4.21287e-05	7.13409e-05	4.6929e-05	1.67954e-05			7.31875	-4.83544	-3.75583	-6.26984
	-2.55263	0.00027401	0.000299821	0.000244242	0.000275106	0.000275157	0.000270429	0.000255295	0.000243513	0.00025439	0.000285034	0.00027853	0.000245934	0.000275205	0.000240707	0.000233705	0.000285405	0.000274288	0.00026435	0.000257981	0.000277296		-2.55263	6.44596e-05	7.76025e-05	6.13034e-05	3.09009e-05	6.20402e-05	3.0147e-06	7.71839e-05	-8.5432e-07	2.51247e-05	3.30478e-05	7.54925e-05	4.23908e-06	3.37717e-05	2.92292e-05	7.51702e-05	8.49191e-05	2.98689e-05	9.55346e-05	7.37929e-05	6.22802e-07			7.34947	-4.25144	-3.61039	-6.52805
	-2.54239	0.000279621	0.00031503	0.000287359	0.000252056	0.000275714	0.000284406	0.000241301	0.000238937	0.000246042	0.000244697	0.00027499	0.0002516	0.000264815	0.000245071	0.000248475	0.000242401	0.000286128	0.000286397	0.00023775	0.000227565		-2.54239	4.95981e-05	5.10301e-05	6.95046e-05	2.15289e-05	5.74656e-05	9.82237e-07	9.07933e-05	2.56374e-06	2.82441e-05	1.64216e-05	5.0694e-05	8.83459e-06	1.98897e-06	2.80027e-05	5.31209e-05	8.48624e-05	5.18081e-05	7.93301e-05	9.70429e-05	-5.06114e-06			7.38019	-4.14692	-3.43646	-6.22202
	-2.53215	0.000262154	0.000334609	0.00030494	0.000244265	0.000275169	0.000276943	0.000236879	0.000244578	0.000231992	0.000211779	0.000277581	0.000272592	0.000244338	0.00024405	0.000265629	0.000212324	0.000304233	0.00032217	0.000253225	0.000213553		-2.53215	9.95211e-06	5.4513e-05	6.03405e-05	3.11823e-05	6.09721e-05	2.67846e-05	6.10181e-05	3.37515e-05	5.50866e-05	-1.84617e-06	4.88282e-05	5.31766e-05	3.02967e-05	9.0225e-06	1.44717e-05	4.14352e-05	8.96032e-05	2.49633e-05	7.89911e-05	-3.96364e-08			7.41091	-3.78092	-3.29456	-5.77589
	-2.52191	0.000240626	0.000328405	0.000285512	0.000259297	0.000258187	0.000258238	0.000247111	0.000245834	0.000215474	0.000239997	0.00026923	0.000272844	0.000224054	0.000246004	0.000277035	0.000238778	0.000309081	0.000340006	0.00027251	0.000244983		-2.52191	-7.63499e-06	6.67795e-05	3.20311e-05	6.19178e-05	6.43323e-05	4.33442e-05	2.34439e-05	5.84009e-05	8.95343e-05	1.91037e-05	7.62507e-05	7.80233e-05	7.60516e-05	-2.0294e-07	5.7939e-07	1.51197e-05	0.000105313	-6.46652e-06	4.08003e-05	3.47173e-06			7.44163	-3.77739	-2.75673	-5.34885
	-2.51167	0.000261244	0.000308553	0.000274878	0.000275107	0.000244176	0.000244662	0.000261783	0.000243811	0.000198386	0.000296048	0.000266409	0.000272365	0.000246022	0.00026131	0.000279025	0.000295579	0.000305289	0.000338173	0.000270466	0.000275161		-2.51167	1.71635e-05	6.4342e-05	-2.96807e-06	9.34968e-05	6.13081e-05	3.23348e-05	1.67476e-05	6.02606e-05	9.71126e-05	5.62056e-05	9.5178e-05	6.43964e-05	9.17808e-05	1.80961e-05	3.04823e-05	2.64135e-05	9.24699e-05	2.76473e-05	3.1465e-05	-1.43282e-07			7.47235	-3.38035	-2.91971	-5.05663
	-2.50143	0.000300292	0.000306637	0.000284124	0.000266222	0.000253765	0.000248547	0.00027949	0.000242971	0.00021182	0.000308302	0.000289379	0.000296831	0.000305495	0.000284087	0.000271418	0.000316487	0.000303516	0.000332701	0.000251769	0.000265764		-2.50143	3.5992e-05	5.88814e-05	-1.76008e-05	9.44633e-05	5.8384e-05	1.9931e-05	3.78344e-05	4.58269e-05	6.35438e-05	5.86139e-05	7.86664e-05	5.05369e-05	7.6635e-05	3.4431e-05	7.48654e-05	3.97891e-05	7.26202e-05	8.91182e-05	5.22812e-05	5.02602e-06			7.50307	-3.31826	-2.58984	-4.85988
	-2.49119	0.000293769	0.000310186	0.000269907	0.000241249	0.000275315	0.000273305	0.000285729	0.000244693	0.00026408	0.000280164	0.000309089	0.000307209	0.000335457	0.000301166	0.000268111	0.000282921	0.000305195	0.000318261	0.000241166	0.000242814		-2.49119	1.20743e-05	6.11224e-05	5.14909e-06	5.52559e-05	6.13737e-05	2.97871e-05	5.72623e-05	2.75549e-05	1.72869e-05	3.41643e-05	4.23839e-05	5.97255e-05	6.04183e-05	1.76576e-05	9.43267e-05	3.28551e-05	6.11386e-05	0.000106032	6.51781e-05	3.37969e-05			7.53379	-2.81998	-2.50891	-4.57987
	-2.48095	0.000252591	0.000285417	0.00022684	0.000230529	0.000281605	0.000292038	0.000265066	0.000255114	0.000305183	0.000265673	0.0002868	0.000262612	0.000296756	0.000304291	0.000280222	0.000241629	0.000304484	0.000287985	0.000259168	0.000247816		-2.48095	-7.14855e-06	5.65084e-05	4.45963e-05	1.01985e-05	5.59626e-05	4.31106e-05	6.12027e-05	2.0598e-05	-1.63504e-09	3.24051e-05	2.44475e-05	6.96655e-05	5.89056e-05	-1.34021e-05	8.82755e-05	2.30731e-05	5.84289e-05	6.72209e-05	6.1841e-05	6.34068e-05			7.56451	-2.7351	-2.44141	-4.29447
	-2.47071	0.000248345	0.000249613	0.000216162	0.000248304	0.000273869	0.000274693	0.000241606	0.000281657	0.000287246	0.000273527	0.000249535	0.000214563	0.000237499	0.00028805	0.000285144	0.000241097	0.000305292	0.000270192	0.000294527	0.000279059		-2.47071	3.1682e-05	3.72143e-05	6.16296e-05	1.47502e-06	2.75484e-05	3.06495e-05	5.98141e-05	3.59711e-05	1.5244e-05	5.76956e-05	4.55936e-05	6.19779e-05	6.10048e-05	-1.46806e-05	8.5942e-05	2.88484e-05	6.15451e-05	3.17362e-05	6.35593e-05	5.83792e-05			7.59523	-2.54425	-2.19113	-4.23766
	-2.46047	0.000292191	0.000246521	0.000253279	0.000271276	0.000269859	0.00024022	0.000252278	0.000305459	0.000242516	0.000273933	0.000249302	0.000236453	0.000211909	0.000259358	0.000261389	0.000274253	0.000307175	0.000289351	0.000309495	0.000302535		-2.46047	8.56875e-05	2.12936e-05	4.64586e-05	2.14992e-05	-2.8164e-06	3.08237e-06	6.2892e-05	5.89356e-05	3.09712e-05	6.39176e-05	8.95154e-05	5.30024e-05	4.9864e-05	2.16734e-05	9.74721e-05	4.60636e-05	6.42427e-05	4.11623e-05	6.56816e-05	3.26223e-05			7.62595	-2.59722	-2.06467	-4.75983
	-2.45023	0.000315891	0.000269713	0.000275094	0.000272566	0.0002755	0.000245584	0.000275587	0.000300403	0.000236821	0.000273463	0.000271984	0.000304741	0.000214778	0.000242622	0.000238879	0.000303826	0.000304509	0.000309624	0.000290453	0.000303869		-2.45023	8.07577e-05	2.60997e-05	2.7457e-05	3.04741e-05	3.39942e-06	8.05976e-07	6.48016e-05	5.68103e-05	3.03905e-05	3.47401e-05	0.000120144	6.11573e-05	2.59643e-05	5.65489e-05	0.000100126	6.06768e-05	6.05773e-05	6.22894e-05	4.77558e-05	3.37342e-05			7.65667	-2.1617	-1.94737	-4.94409
	-2.43999	0.000286002	0.000278158	0.000253793	0.000254647	0.000278847	0.000288943	0.000265094	0.000278212	0.000279231	0.000291786	0.000266396	0.000324472	0.000224855	0.000252213	0.000259733	0.000310442	0.000299995	0.000279653	0.000273091	0.000289844		-2.43999	3.77348e-05	4.52581e-05	2.6063e-05	2.42294e-05	4.12015e-05	3.3559e-05	5.58449e-05	2.28572e-05	3.13796e-05	1.1385e-05	0.000113889	7.17012e-05	4.87217e-06	5.68818e-05	8.04831e-05	5.80284e-05	5.65531e-05	4.52149e-05	2.92268e-05	5.84239e-05			7.68739	-2.20778	-2.1828	-4.46897
	-2.42975	0.000252521	0.000273792	0.000247015	0.000242257	0.000272678	0.000303891	0.00024095	0.000278221	0.000313347	0.000305522	0.000244874	0.000272027	0.00025219	0.00027064	0.000299516	0.000305394	0.000306919	0.000223717	0.000287092	0.000269725		-2.42975	3.14044e-05	6.00979e-05	3.17377e-05	3.71951e-05	6.19259e-05	6.25199e-05	3.84983e-05	-6.00039e-06	4.72339e-05	2.82464e-05	7.49894e-05	6.03815e-05	8.16765e-07	3.65122e-05	6.18745e-05	3.16942e-05	6.2842e-05	6.71528e-06	4.74856e-05	5.7319e-05			7.71811	-2.29028	-1.804	-4.45329
	-2.41951	0.000266569	0.000286275	0.000283068	0.000242778	0.000257251	0.000266915	0.000259108	0.000299778	0.000300752	0.000281607	0.000259544	0.000224874	0.000291109	0.000275506	0.000293705	0.000295801	0.000315081	0.000219443	0.000305774	0.00025091		-2.41951	5.81526e-05	5.71696e-05	3.06017e-05	7.41217e-05	4.577e-05	5.34586e-05	2.62175e-05	6.09564e-06	6.25801e-05	6.07324e-05	2.7765e-05	3.59563e-05	1.46422e-05	2.72782e-05	6.55945e-05	7.98483e-07	6.94261e-05	5.1549e-06	8.56485e-05	3.14708e-05			7.74883	-2.25317	-1.81561	-4.47854
	-2.40927	0.00030241	0.000304669	0.00030821	0.00024347	0.000240821	0.000244343	0.000299698	0.000300583	0.00026225	0.000244773	0.000299523	0.000248497	0.00030454	0.000273604	0.000237564	0.000274177	0.000299258	0.000283992	0.00028837	0.000243139		-2.40927	5.09409e-05	3.55352e-05	3.28994e-05	9.35515e-05	2.91213e-05	2.80081e-05	2.70629e-05	4.57753e-05	6.3608e-05	6.17839e-05	1.00069e-06	3.14822e-05	3.67584e-05	3.03244e-05	6.90246e-05	3.22587e-07	5.69867e-05	4.81485e-05	8.72776e-05	3.74812e-05			7.77955	-1.54009	-1.88274	-4.35146
	-2.39903	0.000307854	0.000289119	0.00028898	0.000240116	0.000235692	0.00027595	0.000294183	0.00026592	0.000243119	0.000234776	0.000300033	0.000300203	0.000285274	0.000278362	0.000193831	0.000238533	0.000262818	0.00033886	0.000250554	0.000244068		-2.39903	6.38431e-06	9.20732e-06	4.98917e-05	7.56904e-05	4.18788e-05	3.2542e-05	3.43998e-05	6.68979e-05	6.12645e-05	2.74054e-05	1.19053e-05	5.11608e-05	5.48466e-05	2.85496e-05	4.17301e-05	3.39843e-05	3.46697e-05	8.0973e-05	4.31712e-05	7.83788e-05			7.81027	-0.990897	-2.03112	-4.13322
	-2.38879	0.000289796	0.000248477	0.00027224	0.000250285	0.000249049	0.000307173	0.000252913	0.00023355	0.000255719	0.000244314	0.00025336	0.000301338	0.000273468	0.000278356	0.00020126	0.000212808	0.000241294	0.00031859	0.000240342	0.000243034		-2.38879	-9.12166e-06	-5.5096e-07	6.4423e-05	5.84738e-05	6.79985e-05	6.81964e-05	3.46955e-05	5.14657e-05	6.37306e-05	-2.57744e-07	5.27244e-05	6.07924e-05	6.26404e-05	2.79285e-05	5.23777e-06	6.20349e-05	3.31081e-05	6.87161e-05	2.21762e-06	8.85996e-05			7.84099	-0.551349	-1.931	-3.97639
	-2.37855	0.000300937	0.000234597	0.000291375	0.00028283	0.00026795	0.000281729	0.000250028	0.000234017	0.000279906	0.000244743	0.000220025	0.000257422	0.000279001	0.000259492	0.000235561	0.000218556	0.000242866	0.000264457	0.000267576	0.000240348		-2.37855	2.54612e-05	1.17877e-05	5.05883e-05	7.57701e-05	8.53665e-05	8.39072e-05	2.17668e-05	3.06682e-05	5.86992e-05	7.61605e-06	9.07182e-05	4.307e-05	6.29556e-05	4.20882e-05	7.60515e-06	5.36411e-05	5.31665e-05	3.81898e-05	-2.50419e-06	5.08093e-05			7.87171	-0.599874	-2.0924	-3.31581
	-2.36831	0.000338666	0.000270342	0.000308423	0.000316108	0.000275077	0.000235082	0.000291385	0.000253579	0.000296856	0.000244547	0.000238458	0.000246892	0.00026522	0.000243425	0.000266089	0.000247435	0.000242457	0.000265833	0.000297078	0.00024879		-2.36831	5.3333e-05	2.95504e-05	1.49636e-05	9.63975e-05	9.33626e-05	4.9994e-05	4.14551e-06	3.77867e-05	4.11038e-05	3.20685e-05	9.45469e-05	3.09094e-05	5.90549e-05	5.8753e-05	4.78938e-05	2.83051e-05	6.01211e-05	2.90157e-05	1.34013e-05	2.77155e-05			7.90243	-0.616295	-2.17498	-3.33836
	-2.35807	0.000338465	0.000318776	0.000289882	0.00031889	0.000272453	0.000226586	0.000314169	0.000268841	0.000307695	0.000259259	0.000280805	0.000285647	0.000227007	0.000260003	0.000289526	0.000269773	0.000236495	0.000321302	0.000305625	0.000266602		-2.35807	3.34884e-05	3.59298e-05	-5.13008e-06	6.67801e-05	8.36695e-05	5.53027e-06	-4.76548e-08	5.88331e-05	2.87187e-05	3.96802e-05	6.4892e-05	5.73638e-05	4.50966e-05	6.69853e-05	7.65838e-05	2.12679e-05	4.0945e-05	4.43216e-05	2.85423e-05	4.8195e-05			7.93315	-0.798587	-2.60243	-3.1699
	-2.34783	0.000281793	0.000335922	0.00026504	0.000289045	0.000278553	0.000252	0.000306757	0.000281396	0.000311748	0.000275815	0.000304803	0.000303986	0.000214296	0.000298505	0.000304298	0.000274454	0.000253565	0.000339882	0.000296487	0.0002771		-2.34783	-1.77218e-06	3.09565e-05	1.27676e-05	1.80122e-06	4.37867e-05	5.54575e-06	1.99721e-05	5.3579e-05	3.01865e-05	2.92231e-05	3.26585e-05	0.000100231	1.89587e-05	8.58365e-05	6.79826e-05	3.25299e-05	3.11776e-05	6.03655e-05	4.2962e-05	6.31306e-05			7.96387	-1.74706	-2.5611	-2.66752
	-2.33759	0.000244195	0.000311903	0.000267043	0.000254584	0.000296668	0.000271069	0.000308035	0.000298783	0.000297882	0.000276948	0.000290172	0.000269171	0.000249098	0.00031794	0.000298659	0.000272452	0.00029083	0.000286826	0.0002772	0.000275703		-2.33759	-6.93998e-07	1.84847e-05	4.85929e-05	-2.00039e-05	3.01281e-06	4.30005e-05	5.11599e-05	1.66305e-05	2.84065e-05	2.4108e-05	2.27281e-05	0.000110518	-1.06407e-06	0.000113364	4.47934e-05	3.70924e-05	6.20693e-05	5.55186e-05	5.96476e-05	4.3323e-05			7.99459	-2.26429	-2.32695	-1.93931
	-2.32735	0.00027194	0.000274317	0.000281121	0.000239042	0.00030621	0.000274798	0.000310389	0.00030715	0.000264555	0.000274646	0.000246394	0.00024081	0.000291903	0.000307705	0.00027885	0.000275577	0.000305994	0.000244456	0.000252686	0.00027476		-2.32735	3.52524e-05	-2.06527e-07	6.78085e-05	3.29001e-05	9.48476e-06	6.33664e-05	6.4009e-05	-1.36339e-05	1.1833e-05	3.22603e-05	3.02145e-05	8.24675e-05	9.01497e-06	9.97727e-05	3.19806e-05	2.84741e-05	0.000107996	3.27514e-05	6.97569e-05	2.52319e-05			8.02531	-3.08951	-2.64958	-1.94666
	-2.31711	0.00030532	0.000257027	0.000280213	0.000240619	0.000289711	0.000274856	0.000279548	0.000288057	0.000235536	0.000277316	0.000208812	0.000258083	0.000306666	0.000296439	0.000267464	0.000279035	0.000286051	0.000269839	0.000243688	0.000276462		-2.31711	6.14365e-05	-1.26568e-05	6.4491e-05	8.93208e-05	4.94685e-05	4.60035e-05	4.3199e-05	-9.03077e-06	-4.98129e-06	3.65681e-05	3.484e-05	5.83614e-05	4.4482e-05	3.5442e-05	2.83219e-05	2.34887e-05	0.000113798	2.49233e-05	6.24007e-05	2.94338e-05			8.05603	-3.71461	-3.24609	-1.9468
	-2.30687	0.000280722	0.000276556	0.00026498	0.000249333	0.000263619	0.000273776	0.000245991	0.000253715	0.000233632	0.000272064	0.000213634	0.000276939	0.000300233	0.000303952	0.000272799	0.000270486	0.000271855	0.000304699	0.000266322	0.000268784		-2.30687	5.22982e-05	1.62945e-06	5.92716e-05	7.29659e-05	5.83266e-05	2.48533e-05	7.16507e-06	1.52886e-05	-6.04508e-06	2.8432e-05	3.06341e-05	6.74209e-05	7.23022e-05	-9.87967e-07	2.93923e-05	3.49479e-05	6.65896e-05	5.87026e-05	3.42945e-05	2.56716e-05			8.08675	-4.6212	-3.37027	-2.17163
	-2.29663	0.000242931	0.00031397	0.00024894	0.000265372	0.000262585	0.000272478	0.000255096	0.000240471	0.000253464	0.0002539	0.000241425	0.000259777	0.00028464	0.000305924	0.000279513	0.000240649	0.000290272	0.000289511	0.000304759	0.000250955		-2.29663	2.94315e-05	3.72965e-05	6.13874e-05	1.43138e-05	2.03804e-05	2.5712e-05	-1.21978e-05	2.98161e-05	5.9712e-06	2.38319e-05	2.73217e-05	8.95e-05	7.0075e-05	3.97375e-05	4.0658e-05	5.47982e-05	1.29721e-05	0.000101816	3.40637e-07	4.67289e-06			8.11747	-5.46744	-3.81254	-2.25226
	-2.28639	0.000259992	0.000336519	0.00023856	0.000288376	0.000290227	0.000276934	0.00027485	0.000257629	0.000270929	0.000242768	0.000243391	0.000238652	0.000259931	0.000277202	0.000276086	0.000203669	0.000315181	0.000274621	0.000321033	0.000238969		-2.28639	2.31626e-05	6.26805e-05	5.62707e-05	1.17971e-06	-1.28003e-05	3.24396e-05	-3.74407e-06	2.87616e-05	2.22538e-05	3.40622e-05	3.08641e-05	8.63494e-05	4.80536e-05	9.05403e-05	5.89647e-05	5.95366e-05	-9.01709e-07	9.21103e-05	-6.38996e-06	5.60189e-06			8.14819	-6.12681	-4.6764	-2.65787
	-2.27615	0.000309946	0.000327157	0.000240047	0.00030439	0.000308251	0.000278821	0.000258336	0.000274009	0.000274931	0.000245065	0.000226104	0.000240496	0.000242543	0.000240332	0.000262297	0.000194518	0.000314005	0.000308707	0.000304261	0.000241145		-2.27615	3.1592e-05	6.42325e-05	3.69058e-05	4.51632e-05	-8.8222e-06	2.98294e-05	1.59525e-05	2.84082e-05	3.64277e-05	4.03667e-05	3.3663e-05	5.21593e-05	3.16821e-05	8.33617e-05	6.78863e-05	3.05524e-05	1.92872e-05	3.26445e-05	3.24705e-05	4.41068e-05			8.17891	-6.64968	-4.96684	-3.40786
	-2.26591	0.000324605	0.00030105	0.000255147	0.000298774	0.000293475	0.000268709	0.000242784	0.000270317	0.000273867	0.000240642	0.000248484	0.000243827	0.000256988	0.000243722	0.000245619	0.000228701	0.000292501	0.000335485	0.000278931	0.000247433		-2.26591	3.40119e-05	6.13072e-05	2.64393e-05	7.3128e-05	1.09688e-05	3.71455e-05	2.92331e-05	4.0246e-05	3.74642e-05	2.31889e-05	3.01444e-05	2.02805e-05	3.5383e-05	6.13131e-05	6.21905e-05	-1.41521e-05	4.10449e-05	-1.39719e-08	8.30855e-05	7.83075e-05			8.20963	-6.4067	-5.58916	-3.75766
	-2.25567	0.00030038	0.000280524	0.000271747	0.000279657	0.00027501	0.000265373	0.000266061	0.000271124	0.000275986	0.000221035	0.000300928	0.000239928	0.000293969	0.000282995	0.000235691	0.00026828	0.000276039	0.000293679	0.000275335	0.000246701		-2.25567	3.04222e-05	6.40512e-05	4.93822e-05	4.53487e-05	2.57433e-05	7.16062e-05	3.99113e-05	5.77726e-05	1.93504e-05	8.41177e-07	2.71783e-05	2.02819e-05	5.42655e-05	7.89416e-05	5.56537e-05	-2.32408e-05	5.53168e-05	2.88766e-05	9.03033e-05	7.13836e-05			8.24035	-7.27549	-5.82436	-4.33756
	-2.24543	0.000278782	0.000274043	0.000276504	0.000269252	0.000279763	0.000291661	0.000276853	0.000287097	0.000276951	0.000215316	0.000299429	0.000252758	0.000315827	0.000305189	0.000243244	0.000270223	0.000278121	0.000241719	0.000292487	0.000235615		-2.24543	4.00781e-05	5.93844e-05	8.88212e-05	4.32234e-06	3.68881e-05	0.000107971	5.90732e-05	6.66344e-05	4.14769e-07	5.00805e-06	3.1489e-05	3.91676e-05	7.01624e-05	9.14513e-05	6.07303e-05	2.16461e-05	6.8897e-05	6.25768e-05	5.29215e-05	4.12213e-05			8.27107	-8.09113	-6.30055	-5.25165
	-2.23519	0.000274344	0.000273323	0.000274709	0.000273443	0.000281393	0.000327796	0.000235144	0.000281351	0.000267813	0.000246779	0.000226716	0.000273667	0.000309365	0.000288252	0.000262661	0.000249113	0.000296783	0.000258545	0.000305588	0.000218115		-2.23519	6.75322e-05	5.15176e-05	9.78403e-05	-3.46077e-06	3.62636e-05	0.000106231	7.4272e-05	6.2795e-05	9.56561e-06	2.61715e-05	3.50723e-05	3.99552e-05	6.65593e-05	4.77947e-05	6.9107e-05	6.36462e-05	6.88728e-05	5.12658e-05	3.05761e-05	2.84032e-05			8.30179	-8.29775	-6.56299	-5.77369
	-2.22495	0.000273581	0.000275691	0.000275359	0.000271167	0.000254596	0.000334151	0.000212604	0.000237502	0.000250263	0.000289127	0.00018116	0.000266223	0.000298188	0.00027471	0.00027466	0.000245339	0.000315501	0.000310565	0.000294401	0.000209679		-2.22495	9.09962e-05	6.85388e-05	5.77118e-05	1.31881e-05	1.48558e-05	6.79736e-05	6.26952e-05	5.6746e-05	4.65313e-05	2.71747e-05	2.88947e-05	1.97979e-05	4.5465e-05	-2.24278e-06	6.14126e-05	4.62369e-05	3.99324e-05	2.92513e-05	5.8189e-05	4.28688e-05			8.33251	-8.22373	-6.51962	-6.15597
	-2.21471	0.000275463	0.000288097	0.000275325	0.000249834	0.000238784	0.000312722	0.000261889	0.000212089	0.000237953	0.00029279	0.000222828	0.000244224	0.0003024	0.000291026	0.000264473	0.000250297	0.000312122	0.000311264	0.000270763	0.000232871		-2.21471	8.82082e-05	0.000107309	6.53822e-06	2.80473e-05	-1.78688e-06	3.51393e-05	3.50832e-05	5.99371e-05	7.59366e-05	6.70822e-06	2.32315e-05	1.86495e-05	3.02941e-05	2.58324e-06	3.09259e-05	4.62318e-06	5.32199e-06	4.13844e-05	9.64015e-05	5.99158e-05			8.36323	-8.25774	-6.60564	-6.89898
	-2.20447	0.00027873	0.000312762	0.00027059	0.000230604	0.000271403	0.00029992	0.000305163	0.000242598	0.000240794	0.000256003	0.00028575	0.00025658	0.000310742	0.000305235	0.00024337	0.000231553	0.000286148	0.000266371	0.00026221	0.000279893		-2.20447	5.81406e-05	0.000121649	-5.55599e-06	4.04345e-05	1.772e-05	3.13487e-05	3.05199e-05	6.80106e-05	7.00407e-05	1.36705e-06	3.50964e-05	5.07539e-05	4.40156e-05	3.39216e-05	-8.46489e-07	1.09423e-05	2.23109e-06	6.34968e-05	9.16563e-05	5.58752e-05			8.39395	-7.91533	-7.05588	-7.21558
	-2.19423	0.000269938	0.000333177	0.000272948	0.000240057	0.000305669	0.00030477	0.0002662	0.000274428	0.000249118	0.000234522	0.000293672	0.000295325	0.000307192	0.000289103	0.000233584	0.000209882	0.000271919	0.000250258	0.000279953	0.000305954		-2.19423	1.97067e-05	8.96991e-05	2.46441e-05	5.81233e-05	5.50096e-05	3.39194e-05	5.28365e-05	6.32269e-05	4.2618e-05	2.09728e-05	5.61381e-05	6.86506e-05	8.30313e-05	4.83848e-05	-1.13486e-06	5.22925e-05	2.49934e-05	5.23674e-05	5.20681e-05	3.50059e-05			8.42467	-7.75978	-7.11962	-7.60252
	-2.18399	0.000249584	0.000332701	0.000288417	0.000259565	0.00027729	0.00029595	0.00021267	0.000249994	0.000246991	0.000263645	0.000266819	0.000305647	0.000298389	0.000273951	0.000245762	0.000230194	0.00029441	0.00028439	0.000301772	0.000284327		-2.18399	-2.38315e-06	5.08715e-05	5.72461e-05	7.05977e-05	6.30807e-05	1.80258e-05	6.09267e-05	3.53414e-05	2.90692e-05	3.47127e-05	5.93293e-05	3.7124e-05	0.00011832	6.57381e-05	3.42907e-05	5.44402e-05	3.68706e-05	2.61107e-05	2.72733e-05	2.00224e-05			8.45539	-7.67942	-7.18835	-7.66635
	-2.17375	0.000246837	0.000314986	0.000304213	0.000248371	0.0002205	0.000257725	0.000230314	0.000214328	0.00023689	0.000302058	0.000250013	0.00028223	0.00030308	0.000288751	0.00026507	0.000269385	0.000330483	0.000312571	0.000302753	0.000248033		-2.17375	6.71589e-06	4.81825e-05	6.23462e-05	6.35981e-05	3.68189e-05	6.25152e-07	4.0632e-05	1.51274e-06	4.19491e-05	3.06136e-05	4.08269e-05	9.91427e-07	0.000124631	9.40126e-05	6.57469e-05	1.27089e-05	3.14463e-05	3.30699e-05	3.42652e-05	2.72527e-05			8.48611	-7.94938	-7.91561	-8.15998
	-2.16351	0.000278136	0.000301474	0.000306643	0.000212453	0.000216969	0.000217321	0.000277226	0.000231772	0.000239949	0.000293345	0.000240618	0.000268706	0.000314217	0.000306843	0.000275217	0.0002638	0.000336459	0.000297229	0.000284935	0.000236904		-2.16351	3.95253e-05	6.94699e-05	4.64081e-05	4.27552e-05	1.72122e-05	8.22392e-06	3.11639e-05	-4.07843e-06	5.95999e-05	3.83631e-05	2.96912e-05	1.68015e-05	0.000101541	8.45733e-05	5.81257e-05	1.30414e-07	3.56909e-05	7.31187e-05	4.1017e-05	5.50203e-05			8.51683	-7.75644	-7.67644	-8.32386
	-2.15327	0.000320267	0.000302526	0.000305093	0.000210912	0.000266577	0.000209544	0.000273197	0.000274222	0.000260341	0.000254035	0.00023434	0.000274212	0.00030754	0.000293176	0.000275838	0.000222289	0.000310471	0.000271213	0.00027207	0.000243624		-2.15327	7.32159e-05	7.28812e-05	3.12078e-05	3.06423e-05	2.74492e-05	2.77594e-05	5.06491e-05	2.99172e-05	5.63121e-05	7.47736e-05	4.53945e-05	5.61539e-05	6.56067e-05	2.92997e-05	3.21547e-05	4.25294e-05	5.72385e-05	9.88024e-05	2.24359e-05	8.8644e-05			8.54755	-7.48087	-7.5604	-8.65996
	-2.14303	0.000338695	0.000304253	0.000308401	0.000262448	0.000295809	0.00023457	0.000240662	0.000274461	0.000274703	0.000243647	0.000256359	0.000267097	0.000283056	0.00027041	0.000273767	0.000220569	0.00029056	0.000283317	0.000273072	0.000242602		-2.14303	9.07485e-05	4.91496e-05	2.70706e-05	4.09628e-05	4.18965e-05	3.1587e-05	6.05579e-05	6.67097e-05	3.49038e-05	0.000108716	6.8493e-05	5.20179e-05	2.93183e-05	-2.76541e-06	3.36939e-05	8.08449e-05	7.16066e-05	8.25201e-05	-6.20021e-07	0.000105862			8.57827	-7.64983	-7.56963	-8.76368
	-2.13279	0.000328602	0.000288075	0.000305367	0.000304844	0.00027821	0.000268566	0.000235375	0.000243275	0.000264305	0.000267372	0.000295924	0.000247099	0.000274112	0.000280581	0.00026129	0.000281555	0.000301808	0.000321697	0.000272955	0.000243472		-2.13279	8.87298e-05	2.9599e-05	3.05757e-05	6.07547e-05	3.28928e-05	2.92289e-05	4.02872e-05	6.03214e-05	2.11385e-05	0.000103556	6.98851e-05	9.53989e-06	1.27485e-06	1.68641e-05	5.83027e-05	7.13284e-05	6.36199e-05	4.58998e-05	7.4509e-06	9.35831e-05			8.60899	-7.90963	-7.81957	-8.96628
	-2.12255	0.000310627	0.000263801	0.000279016	0.000276543	0.000251239	0.000292853	0.000244851	0.000232375	0.000245922	0.000275411	0.000299836	0.000246686	0.000291014	0.000315688	0.000239487	0.000340412	0.000326329	0.000335593	0.000257094	0.00025987		-2.12255	7.16622e-05	3.79222e-05	3.31555e-05	6.04322e-05	1.70083e-05	4.38036e-05	3.23372e-05	1.91383e-05	2.8435e-05	6.67417e-05	5.4777e-05	-1.31419e-05	-2.68903e-06	3.04714e-05	5.68393e-05	4.10966e-05	4.50585e-05	2.78116e-05	4.34722e-05	6.83485e-05			8.63971	-7.95553	-7.78742	-9.13388
	-2.11231	0.000302914	0.000263212	0.000243105	0.000213113	0.000243964	0.000304578	0.000240428	0.000245082	0.000241495	0.00025237	0.000261484	0.000269824	0.000305126	0.000324627	0.000240799	0.000343529	0.000336018	0.000315218	0.000236618	0.000274559		-2.11231	5.37119e-05	5.74436e-05	3.04829e-05	3.02515e-05	2.86541e-05	6.06439e-05	6.53009e-05	3.95755e-07	3.91511e-05	3.54196e-05	5.30548e-05	-3.20373e-06	2.95712e-05	8.85756e-06	1.9529e-05	2.94487e-05	3.14408e-05	4.31281e-05	6.63401e-05	6.11462e-05			8.67043	-8.04927	-7.73535	-9.16812
	-2.10207	0.000304822	0.000290553	0.000228562	0.000198106	0.000251903	0.000300369	0.000248886	0.000248682	0.000244423	0.000233644	0.000239014	0.000283651	0.000299776	0.000288317	0.000292965	0.000309156	0.000323322	0.000304349	0.000234583	0.000271693		-2.10207	5.4249e-05	5.86314e-05	2.75017e-05	-6.99e-07	5.81491e-05	5.2461e-05	9.4714e-05	2.94023e-05	3.23162e-05	2.79764e-05	6.98326e-05	9.53934e-06	7.69064e-05	3.46179e-06	-5.9968e-07	3.93e-05	2.61682e-05	7.41338e-05	5.00495e-05	7.0176e-05			8.70116	-7.9021	-7.74912	-9.25264
	-2.09183	0.000301698	0.000307704	0.000246219	0.000247552	0.00027399	0.000277921	0.000285037	0.000243636	0.000233255	0.000239898	0.000259783	0.000276506	0.0003057	0.000248032	0.000356053	0.000279356	0.000305742	0.000323726	0.000254783	0.000275018		-2.09183	6.97723e-05	3.99067e-05	3.11033e-05	1.02032e-06	6.167e-05	3.21653e-05	7.06329e-05	6.37753e-05	1.89264e-05	3.06426e-05	7.27498e-05	2.5958e-05	9.15762e-05	4.00734e-05	2.97641e-05	5.7199e-05	3.0219e-05	9.2487e-05	1.47843e-05	6.0589e-05			8.73188	-7.47192	-8.04936	-9.78133
	-2.08159	0.000283876	0.000296175	0.000269352	0.000288495	0.000301129	0.000249162	0.000306841	0.000244077	0.000214432	0.000255377	0.000284717	0.000268684	0.000340028	0.000251578	0.000356998	0.000261845	0.000299868	0.000339381	0.000273467	0.000295964		-2.08159	6.9464e-05	1.95252e-05	3.51492e-05	2.43371e-05	3.65074e-05	2.68959e-05	1.65115e-05	5.73464e-05	2.89282e-05	2.84106e-05	4.17292e-05	6.24635e-05	5.17296e-05	6.69244e-05	7.23674e-05	7.04201e-05	4.41824e-05	8.61496e-05	-2.56706e-06	2.31269e-05			8.7626	-7.37785	-7.89218	-9.81703
	-2.07135	0.000264658	0.000295137	0.000274165	0.000270588	0.00030481	0.000243282	0.000289656	0.000243239	0.000214128	0.000270933	0.000281687	0.000273693	0.000366674	0.000288848	0.000288881	0.000246719	0.000305203	0.000321587	0.000269091	0.000304675		-2.07135	4.8173e-05	4.23357e-06	2.93669e-05	2.96629e-05	3.09718e-05	3.05858e-05	-9.26169e-06	2.55792e-05	6.39613e-05	2.87109e-05	5.84862e-06	9.12929e-05	-2.94227e-06	4.8051e-05	7.70324e-05	6.47848e-05	6.13192e-05	6.75542e-05	7.75596e-06	-1.74358e-07			8.79332	-7.60015	-7.83393	-9.8638
	-2.06111	0.000267673	0.00032821	0.000269339	0.000235476	0.000273554	0.000270769	0.000271011	0.000237132	0.000243521	0.000284738	0.00026482	0.000278727	0.00034526	0.000309611	0.000227264	0.000236459	0.000299733	0.000288343	0.00024999	0.000285292		-2.06111	4.92539e-05	-2.12767e-06	2.1858e-05	1.00945e-05	5.62107e-05	2.8006e-05	9.47628e-06	1.53196e-05	9.16771e-05	4.22875e-05	3.78415e-06	7.39774e-05	-1.1073e-05	2.08406e-05	5.03598e-05	4.21083e-05	6.88915e-05	6.01648e-05	2.57018e-05	2.38957e-05			8.82404	-7.3926	-7.90595	-9.79045
	-2.05087	0.000286085	0.000344454	0.000276774	0.000249882	0.000242777	0.000304833	0.000273699	0.000249188	0.000282398	0.00027909	0.000250221	0.00027509	0.000300572	0.000291205	0.000226424	0.00024206	0.000272969	0.000272323	0.000242949	0.000275134		-2.05087	8.79039e-05	1.76946e-05	3.49005e-05	3.71779e-07	5.98744e-05	3.04857e-05	4.43389e-05	3.65732e-05	9.38329e-05	5.93e-05	2.5329e-05	3.29128e-05	3.7909e-05	2.30917e-05	3.15609e-05	3.00837e-05	6.04988e-05	7.78408e-05	3.2823e-05	6.49247e-05			8.85476	-7.32624	-7.78791	-9.70307
	-2.04063	0.000283176	0.000298802	0.00028551	0.000296254	0.000238542	0.000305889	0.000270959	0.00028433	0.000305462	0.000244711	0.00023246	0.00027056	0.000286448	0.000258772	0.000255032	0.000259428	0.0002449	0.000284916	0.000261447	0.000293933		-2.04063	0.000102461	5.75905e-05	6.9346e-05	1.64102e-05	2.20075e-05	4.01107e-05	6.73658e-05	5.82355e-05	9.20875e-05	6.41203e-05	2.92188e-05	1.79895e-05	8.85727e-05	3.59572e-05	3.22761e-05	4.37346e-05	4.21875e-05	0.000109933	3.11916e-05	6.58248e-05			8.88548	-7.65821	-7.5329	-9.72919
	-2.03039	0.000251524	0.000247024	0.000267783	0.000300181	0.00024436	0.000273453	0.000251501	0.00030787	0.000299236	0.000215024	0.000215676	0.000274514	0.000309633	0.000242646	0.00025637	0.000273902	0.000245514	0.000319888	0.00029609	0.000304194		-2.03039	5.11542e-05	6.8552e-05	9.49817e-05	3.24133e-05	3.02793e-07	2.98535e-05	6.90447e-05	6.01465e-05	0.00010786	6.13949e-05	7.77124e-06	3.03144e-05	8.79301e-05	3.35921e-05	3.37354e-05	6.05505e-05	3.02387e-05	0.000125955	3.09441e-05	2.23662e-05			8.9162	-7.6238	-7.05721	-9.66413
	-2.02015	0.000238718	0.000265636	0.000229639	0.000247078	0.000241752	0.000242643	0.000243468	0.000294146	0.000272225	0.000219937	0.000217135	0.000278717	0.000321914	0.000253009	0.000232747	0.000276387	0.000266047	0.000353966	0.000328418	0.000275743		-2.02015	8.5663e-07	2.97375e-05	8.59328e-05	3.18454e-05	3.08513e-05	4.14795e-07	5.34506e-05	5.60993e-05	0.000122751	6.27906e-05	-8.64075e-06	3.64342e-05	4.99522e-05	3.11859e-05	2.7019e-05	6.05592e-05	3.94185e-05	0.000107052	3.18693e-05	-1.01981e-05			8.94692	-7.88914	-6.7467	-9.56106
	-2.00991	0.00027133	0.000325691	0.000212795	0.000210104	0.000245919	0.000245652	0.000248583	0.000267337	0.000246265	0.000242489	0.000237288	0.000274465	0.00029793	0.000287983	0.000230266	0.000274676	0.000274302	0.000349679	0.000338693	0.000236999		-2.00991	2.76685e-05	-1.11034e-06	5.07324e-05	3.14582e-05	6.39654e-05	2.17845e-06	3.56235e-05	6.62586e-05	0.000103267	6.19227e-05	-3.86289e-06	3.04898e-05	2.97303e-05	5.01401e-05	2.54588e-05	6.08192e-05	6.49688e-05	7.10887e-05	2.42957e-05	7.40954e-06			8.97764	-7.51927	-6.31245	-9.44471
	-1.99967	0.000303858	0.000341409	0.000229544	0.000237513	0.000263721	0.000277425	0.000232045	0.000263007	0.000245805	0.000256278	0.000257395	0.000267662	0.000271046	0.000324553	0.000264538	0.000275825	0.000267328	0.000297772	0.000316655	0.000217786		-1.99967	8.5777e-05	2.38445e-05	1.53789e-05	3.60895e-05	5.25388e-05	5.22682e-05	2.93594e-05	8.60597e-05	5.51311e-05	4.7999e-05	9.95541e-06	2.86636e-05	4.53607e-05	7.37329e-05	3.95331e-05	7.86795e-05	7.73276e-05	5.17919e-05	6.03087e-06	4.69774e-05			9.00836	-7.24707	-6.09757	-9.53782
	-1.98943	0.000292158	0.000310778	0.000247557	0.000286312	0.000275613	0.000307469	0.00019424	0.000283064	0.000274441	0.000273674	0.000271142	0.000275806	0.000280303	0.000320054	0.00029964	0.000274668	0.000279452	0.000248775	0.000279784	0.000213007		-1.98943	7.78702e-05	5.93689e-05	-4.25032e-06	2.5116e-05	2.66776e-05	9.44845e-05	3.08473e-05	8.95209e-05	2.35842e-05	3.10968e-05	2.58149e-05	3.06398e-05	6.44938e-05	7.00805e-05	5.77086e-05	9.19012e-05	5.4446e-05	5.75218e-05	-9.70008e-06	6.19413e-05			9.03908	-7.12843	-6.10758	-9.76268
	-1.97919	0.00027368	0.000295202	0.000245849	0.000293028	0.000273708	0.000303676	0.000184045	0.000302236	0.000310185	0.000300486	0.000286721	0.000296401	0.000304537	0.00026968	0.000301506	0.000260308	0.000316475	0.000254564	0.00026962	0.000221417		-1.97919	1.12783e-05	4.92431e-05	-6.43262e-06	3.16571e-06	2.51095e-05	8.51587e-05	2.90545e-05	5.89746e-05	3.49124e-05	2.60866e-05	4.64593e-05	2.8537e-05	6.47155e-05	4.21251e-05	5.90016e-05	7.02734e-05	1.52793e-05	6.74517e-05	-5.40738e-06	5.72694e-05			9.0698	-7.04019	-6.22632	-9.57072
	-1.96895	0.000297731	0.000304402	0.000245977	0.000263404	0.000276168	0.000267394	0.000221553	0.000302537	0.000320313	0.000305054	0.000303242	0.000304478	0.000299443	0.000239136	0.000281237	0.000243653	0.000336011	0.000296629	0.000300541	0.000257919		-1.96895	-2.54377e-05	2.99273e-05	5.52058e-06	3.94862e-06	3.10259e-05	5.77771e-05	2.76823e-05	1.24129e-05	5.99336e-05	3.06876e-05	6.08513e-05	3.17073e-05	6.07156e-05	2.75951e-05	3.97295e-05	2.89104e-05	-3.31922e-07	6.42404e-05	2.23491e-05	6.57024e-05			9.10052	-6.89285	-6.1388	-9.21637
	-1.95871	0.00033378	0.000297363	0.000263272	0.00024356	0.000281398	0.000237393	0.000266368	0.000285512	0.00029882	0.0002714	0.000302762	0.000279581	0.00027512	0.000276984	0.00026978	0.000248541	0.000307471	0.000311459	0.000333541	0.000299674		-1.95871	-4.669e-06	5.6066e-05	2.28961e-05	2.53627e-05	2.65077e-05	5.50067e-05	3.80773e-05	-8.26023e-06	5.79784e-05	4.13639e-05	5.34065e-05	4.75307e-05	6.24726e-05	4.90671e-05	2.08956e-05	1.22408e-05	1.57327e-05	4.96304e-05	5.61109e-05	7.46722e-05			9.13124	-6.61608	-5.94305	-9.19282
	-1.94847	0.000321749	0.000276128	0.000279107	0.000246471	0.000267909	0.000250621	0.000278544	0.000267469	0.00027545	0.000243594	0.000279346	0.000237392	0.000282373	0.000330816	0.000273006	0.000277533	0.000264115	0.000282335	0.00032291	0.000297863		-1.94847	2.27885e-05	9.09457e-05	3.35946e-05	2.73472e-05	3.72046e-05	6.13932e-05	5.58683e-05	1.47636e-05	3.62275e-05	6.25589e-05	3.32922e-05	6.30235e-05	5.90062e-05	8.49456e-05	2.41616e-05	3.35438e-05	3.43202e-05	3.33467e-05	6.60524e-05	4.67111e-05			9.16196	-6.1704	-5.96176	-8.88062
	-1.93823	0.00027797	0.00027116	0.000278034	0.000248186	0.000244513	0.000289073	0.000264201	0.000266537	0.000277046	0.000254932	0.000252016	0.000211432	0.000320534	0.000318161	0.000275193	0.000293719	0.000256558	0.000255158	0.000281109	0.000258182		-1.93823	3.01991e-05	7.30422e-05	3.32234e-05	6.34225e-06	7.32268e-05	4.73086e-05	6.51211e-05	5.09597e-05	3.26476e-05	7.79251e-05	2.32187e-05	6.56381e-05	5.48066e-05	0.000100413	4.53895e-05	5.98477e-05	3.50602e-05	2.45727e-05	3.78158e-05	4.03063e-06			9.19268	-5.55778	-6.48448	-8.24654
	-1.92799	0.000259227	0.000274863	0.000272572	0.000240079	0.000251373	0.000305595	0.00024797	0.000285834	0.00028391	0.000275584	0.000243828	0.000216651	0.000336561	0.000255479	0.000274121	0.000268836	0.000285744	0.00026928	0.000257158	0.000245909		-1.92799	4.15372e-05	3.19306e-05	2.86064e-05	2.26573e-06	9.51932e-05	2.61428e-05	6.28043e-05	6.44039e-05	5.14017e-05	5.73601e-05	2.934e-05	5.95787e-05	6.98744e-05	9.38262e-05	6.07455e-05	5.94143e-05	2.90429e-05	2.90475e-05	-9.77624e-07	1.1105e-05			9.2234	-5.24115	-6.2266	-8.07123
	-1.91775	0.000273799	0.000260693	0.000273488	0.000238856	0.000289229	0.000289234	0.000239408	0.000304555	0.00026638	0.000265321	0.000248276	0.00023515	0.000316272	0.000229049	0.000277112	0.000225615	0.000307687	0.000301674	0.000271386	0.000283511		-1.91775	6.08194e-05	3.25887e-05	2.7988e-05	2.24551e-05	7.82145e-05	2.32814e-05	5.95826e-05	6.11098e-05	6.26108e-05	1.36416e-05	4.32472e-05	4.71559e-05	9.15834e-05	8.88403e-05	5.46835e-05	3.96449e-05	2.93324e-05	3.73225e-05	-3.1554e-06	6.70003e-05			9.25412	-4.48443	-6.04114	-7.98125
	-1.90751	0.000290537	0.00024419	0.00027448	0.000249555	0.000305246	0.000269306	0.000241074	0.00029597	0.000242636	0.000241228	0.000244781	0.000245271	0.000301484	0.000265866	0.000277035	0.000215513	0.000298233	0.000307008	0.000296004	0.00031105		-1.90751	4.97722e-05	6.11707e-05	3.5664e-05	3.24524e-05	5.34344e-05	3.46094e-05	6.06279e-05	6.40735e-05	5.98115e-05	1.66436e-06	6.02263e-05	2.36704e-05	8.29447e-05	9.1787e-05	3.52881e-05	3.0826e-05	3.05352e-05	3.21696e-05	3.41582e-05	9.90314e-05			9.28484	-4.457	-6.18958	-7.49857
	-1.89727	0.000305245	0.000244128	0.000273625	0.000251098	0.000270052	0.000255642	0.000254294	0.000259636	0.000251199	0.0002363	0.000234698	0.0002446	0.000305815	0.000306721	0.000261602	0.000248066	0.000277952	0.000282822	0.00030516	0.000276409		-1.89727	-1.91017e-07	6.00558e-05	5.25095e-05	2.81667e-05	5.36357e-05	4.82436e-05	6.2212e-05	6.59032e-05	6.44322e-05	3.47792e-05	7.18789e-05	7.86451e-07	4.62058e-05	8.58197e-05	2.23979e-05	4.51482e-05	2.86653e-05	1.94618e-05	6.09344e-05	7.73945e-05			9.31556	-4.17911	-5.95044	-7.12096
	-1.88703	0.000317331	0.000243805	0.000276491	0.000231962	0.00023101	0.000236519	0.000271329	0.000228481	0.000274473	0.000245704	0.000243806	0.000244268	0.000298147	0.000307456	0.000245131	0.000278609	0.000277649	0.000273848	0.000302594	0.000215851		-1.88703	-3.17085e-05	2.92997e-05	6.96345e-05	3.97088e-05	6.65222e-05	7.12983e-05	6.19511e-05	4.89411e-05	7.04925e-05	6.45641e-05	6.16486e-05	5.1771e-06	2.29524e-05	6.43765e-05	2.75352e-05	6.49403e-05	3.51894e-05	2.8798e-05	4.83125e-05	5.19743e-05			9.34628	-4.11608	-5.44498	-6.33238
	-1.87679	0.000303554	0.00023386	0.000277038	0.00021384	0.0002478	0.000228384	0.00027921	0.000233822	0.000266541	0.000247036	0.000269256	0.000245336	0.000277641	0.000285164	0.000250249	0.000267656	0.000296718	0.000300899	0.000305013	0.000200815		-1.87679	3.00873e-06	7.33671e-06	6.86899e-05	6.03503e-05	6.68397e-05	0.000105919	5.58902e-05	3.08807e-05	4.78421e-05	6.43296e-05	2.78287e-05	3.88165e-05	2.67551e-05	4.18827e-05	4.48161e-05	6.82052e-05	5.35003e-05	6.50048e-05	3.07415e-05	5.65708e-05			9.377	-3.24969	-5.16875	-5.64195
	-1.86655	0.000262223	0.000246754	0.000269241	0.000220497	0.000298583	0.000263941	0.000276306	0.000264699	0.000242427	0.000243417	0.000274175	0.000242418	0.000279672	0.000274566	0.000271604	0.000235928	0.000306491	0.000335228	0.000309916	0.000234214		-1.86655	5.94197e-05	-6.02198e-07	4.61416e-05	5.02522e-05	5.40986e-05	0.000127688	3.64289e-05	3.96408e-05	8.75021e-06	6.202e-05	-4.45023e-07	6.93088e-05	3.24453e-05	3.09885e-05	5.97522e-05	5.83966e-05	6.27138e-05	9.17252e-05	4.19095e-05	6.09294e-05			9.40772	-2.59801	-4.64283	-4.96685
	-1.85631	0.000244717	0.000286179	0.000269253	0.000239799	0.000300483	0.000320145	0.000264917	0.00027858	0.000256693	0.000243914	0.00024225	0.000239881	0.000300902	0.000283985	0.000281704	0.000229549	0.000288443	0.000344023	0.000304952	0.000251575		-1.85631	5.78871e-05	-6.66133e-06	2.91212e-05	1.2112e-05	3.84009e-05	0.000112868	8.82092e-06	5.935e-05	4.92642e-06	6.79878e-05	4.95427e-06	7.11713e-05	3.0332e-05	2.93412e-05	6.46914e-05	5.63035e-05	4.48477e-05	8.28151e-05	6.14811e-05	4.08656e-05			9.43844	-2.12083	-4.16636	-4.24378
	-1.84607	0.000275234	0.000304916	0.000289092	0.000244501	0.000232825	0.000333507	0.000247127	0.000253731	0.000296987	0.000243167	0.000212445	0.000249489	0.000300812	0.000304588	0.000275634	0.000252222	0.000262323	0.000335397	0.000287765	0.000223882		-1.84607	9.50992e-06	2.90492e-06	4.49536e-05	-9.42362e-06	2.07083e-05	7.24982e-05	-1.55629e-06	5.44825e-05	4.32935e-05	5.44239e-05	3.2703e-05	5.31966e-05	3.34166e-05	3.05991e-05	6.20097e-05	6.29854e-05	1.7929e-05	6.08299e-05	6.3014e-05	2.11609e-05			9.46916	-1.65009	-3.61757	-3.66315
	-1.83583	0.000307443	0.000285304	0.000305738	0.000241276	0.000180201	0.000295124	0.000233374	0.000218769	0.00029785	0.000239966	0.000219892	0.000267289	0.000279796	0.000315685	0.000270113	0.000259269	0.000263542	0.000322665	0.000274097	0.000205611		-1.83583	4.08559e-06	3.60932e-05	8.203e-05	-3.07397e-06	3.70188e-06	3.88722e-05	2.13109e-05	3.36263e-05	6.83749e-05	2.8961e-05	4.44628e-05	3.62708e-05	3.48851e-05	3.07969e-05	5.14797e-05	5.20346e-05	1.89098e-05	5.56512e-05	6.15186e-05	2.50067e-05			9.49988	-1.04337	-2.81923	-3.50678
	-1.82559	0.000297175	0.000275494	0.000293292	0.00025943	0.000209931	0.000262643	0.000241686	0.000213376	0.000257473	0.000248857	0.00024697	0.000277091	0.000272717	0.000304871	0.000274235	0.000230558	0.000292098	0.000303532	0.000271938	0.000244589		-1.82559	6.02493e-05	6.4545e-05	0.00010398	1.4697e-06	8.8173e-07	2.73898e-05	5.78096e-05	3.40269e-05	4.71464e-05	4.00381e-05	2.78341e-05	2.78044e-05	1.66483e-05	3.06695e-05	3.20572e-05	1.55836e-05	4.98091e-05	6.15531e-05	6.80705e-05	4.14888e-05			9.5306	-0.334065	-1.93424	-2.73635
	-1.81535	0.000270571	0.000295556	0.000274626	0.000296652	0.000266939	0.000267448	0.000264016	0.000238175	0.000241669	0.000267968	0.000254117	0.000275596	0.000276639	0.000290704	0.000277578	0.000206609	0.000308353	0.000288772	0.00027478	0.000298153		-1.81535	9.23298e-05	6.66353e-05	9.68062e-05	-1.64575e-06	2.01156e-05	2.8665e-05	7.41019e-05	5.66887e-05	1.56624e-05	8.1804e-05	1.53466e-05	2.71714e-05	-1.67327e-06	3.96124e-05	1.8065e-05	-8.01528e-06	6.67283e-05	6.08465e-05	5.88528e-05	5.6957e-05			9.56132	0.624602	-0.927792	-2.08056
	-1.80511	0.000266445	0.000303656	0.000290157	0.000311513	0.000263422	0.000279469	0.000274585	0.00025612	0.000266422	0.000273686	0.000241733	0.000274665	0.000261838	0.000307125	0.000274769	0.000227744	0.00029164	0.000309746	0.000274255	0.000296063		-1.80511	5.77718e-05	6.05073e-05	7.71063e-05	1.44947e-05	4.78383e-05	3.44745e-05	6.26729e-05	6.89902e-05	1.93337e-05	8.49004e-05	3.61906e-05	3.66566e-05	2.11316e-05	6.28875e-05	3.00616e-05	1.49803e-05	4.04837e-05	6.21509e-05	3.26134e-05	6.80565e-05			9.59204	1.71441	-0.287248	-1.86336
	-1.79487	0.000276478	0.000282528	0.000329581	0.000284441	0.000220631	0.000276109	0.000276025	0.000247229	0.000271665	0.000256309	0.000236781	0.000276158	0.000243666	0.000337741	0.000271308	0.000266621	0.00027386	0.000353509	0.000274862	0.000252978		-1.79487	2.91117e-05	6.24047e-05	6.29811e-05	5.25774e-05	6.13442e-05	5.08095e-05	4.2706e-05	6.26921e-05	4.9095e-05	3.07167e-05	6.48816e-05	5.39021e-05	7.82392e-05	7.84087e-05	5.72176e-05	5.45505e-05	4.26969e-06	7.8168e-05	3.41195e-05	6.53387e-05			9.62276	2.42293	0.42669	-1.63872
	-1.78463	0.000276308	0.00027667	0.000335891	0.000247448	0.000220591	0.000277382	0.000304082	0.000232505	0.000230236	0.000237438	0.000246461	0.000269049	0.000260387	0.000332584	0.000274797	0.000270446	0.000285424	0.00036382	0.000276453	0.000238996		-1.78463	6.14337e-05	5.85581e-05	5.86717e-05	7.77058e-05	5.7302e-05	7.7469e-05	3.07938e-05	5.84433e-05	6.38032e-05	-1.17345e-05	5.50076e-05	6.68576e-05	0.000108396	5.70326e-05	6.0871e-05	5.4202e-05	8.94688e-06	9.296e-05	7.27101e-05	4.61639e-05			9.65348	3.35116	0.852716	-1.08073
	-1.77439	0.000275645	0.000299003	0.00028609	0.000241286	0.000264391	0.000297051	0.000353948	0.000241334	0.000197547	0.00023719	0.000250354	0.00025177	0.000299017	0.000292672	0.000278927	0.000247441	0.000304289	0.000327631	0.000273429	0.00026753		-1.77439	9.68129e-05	4.09987e-05	6.09297e-05	6.67821e-05	5.77124e-05	9.3094e-05	2.74933e-05	6.13051e-05	4.95622e-05	6.79414e-06	1.48455e-05	6.57075e-05	7.48458e-05	1.40612e-05	2.96686e-05	1.54696e-05	4.97916e-05	8.21934e-05	9.1349e-05	3.13657e-05			9.6842	3.68293	1.71171	-0.68353
	-1.76415	0.00029086	0.000300176	0.00022441	0.000261259	0.000285228	0.000314369	0.000365645	0.000265017	0.0002256	0.000251895	0.0002409	0.000233827	0.000308315	0.000274467	0.000273818	0.000252478	0.000295626	0.000303809	0.000269215	0.000287473		-1.76415	6.89824e-05	2.81452e-05	5.77419e-05	3.35154e-05	7.6235e-05	8.16053e-05	3.08036e-05	5.34454e-05	3.20044e-05	5.01606e-05	1.54373e-06	5.24528e-05	1.61852e-05	1.4183e-06	-1.41563e-06	-5.31392e-06	7.69362e-05	5.61442e-05	6.00218e-05	3.31474e-05			9.71492	3.93315	2.04912	-0.167328
	-1.75391	0.000310294	0.000262482	0.000210909	0.000274496	0.000275679	0.000310618	0.000307993	0.000274844	0.00028435	0.00026834	0.000235867	0.000218736	0.000280667	0.000283111	0.000257584	0.000291734	0.000276148	0.000321851	0.000278314	0.000277499		-1.75391	1.5347e-05	2.91832e-05	3.46799e-05	3.19085e-06	9.2101e-05	6.28996e-05	4.35282e-05	3.2262e-05	3.6199e-05	6.55484e-05	3.43889e-05	3.57783e-05	-2.7467e-06	3.28213e-05	-6.6728e-06	1.6513e-05	6.71523e-05	4.87474e-05	2.4394e-05	3.23961e-05			9.74564	4.41512	2.87274	-0.232062
	-1.74367	0.000312578	0.000242812	0.000251685	0.000269651	0.00028268	0.000287196	0.000240955	0.000268103	0.000308311	0.000279101	0.000250173	0.000205985	0.000252551	0.000268342	0.000242764	0.000307118	0.00028164	0.000335076	0.000296798	0.000266555		-1.74367	8.90191e-06	3.00251e-05	2.91963e-06	-1.03517e-05	7.71528e-05	6.79025e-05	6.24857e-05	1.97247e-05	5.62408e-05	5.26327e-05	6.9051e-05	2.47866e-05	2.73255e-05	6.58317e-05	9.27403e-07	4.29128e-05	4.3073e-05	6.6951e-05	2.22405e-05	2.03552e-05			9.77636	5.10696	3.17117	0.532402
	-1.73343	0.000298687	0.000276617	0.000302409	0.000272876	0.000303953	0.000253054	0.000235806	0.000274083	0.000282005	0.000278894	0.000269536	0.000207666	0.00024434	0.00023617	0.000237812	0.000266894	0.000302782	0.00030439	0.000306162	0.00027324		-1.73343	4.60942e-05	2.72815e-05	-1.42342e-06	-2.04391e-06	3.78289e-05	8.89703e-05	7.13306e-05	3.00275e-05	6.95647e-05	3.65537e-05	7.02608e-05	2.69253e-05	5.92219e-05	6.9496e-05	1.1067e-05	3.83345e-05	3.0835e-05	7.62808e-05	3.37588e-05	2.69855e-05			9.80708	5.65118	3.36626	1.08739
	-1.72319	0.000281901	0.000319517	0.000319431	0.000301613	0.000290575	0.000226316	0.000279856	0.000297194	0.000248359	0.000265427	0.000274152	0.000233544	0.000242263	0.000255605	0.000246626	0.000214256	0.000301132	0.00026492	0.000304284	0.000280089		-1.72319	6.74494e-05	3.66217e-05	3.09641e-05	2.63202e-05	5.33702e-06	8.45627e-05	5.89012e-05	5.01524e-05	6.48182e-05	2.20836e-05	5.72137e-05	4.15821e-05	6.24647e-05	5.82142e-05	3.57997e-05	2.01453e-05	3.70166e-05	4.95233e-05	4.51699e-05	6.53124e-05			9.8378	6.09718	3.38183	1.59963
	-1.71295	0.000270587	0.000319787	0.000305705	0.000334631	0.000248618	0.000236225	0.000299424	0.000305015	0.000238839	0.000248364	0.000270559	0.000267785	0.000243391	0.000318044	0.00027366	0.000205196	0.000277891	0.000260896	0.000306775	0.000275456		-1.71295	5.11877e-05	5.58733e-05	6.09048e-05	5.98332e-05	-1.24008e-06	4.14705e-05	3.80137e-05	6.13391e-05	4.1356e-05	4.95875e-06	5.68836e-05	5.80636e-05	6.05465e-05	4.47934e-05	6.35631e-05	2.34076e-05	5.76771e-05	9.67343e-06	7.27539e-05	9.18629e-05			9.86852	6.24818	3.67996	1.54745
	-1.70271	0.000269394	0.000290915	0.000294423	0.000335579	0.000236223	0.000279098	0.000266958	0.000276818	0.000243311	0.000240894	0.000281108	0.000282859	0.000263095	0.00032957	0.000312881	0.000237399	0.000265529	0.000282969	0.000310242	0.000263021		-1.70271	3.10911e-05	5.97552e-05	5.44903e-05	7.47301e-05	1.93355e-05	4.61578e-06	3.06305e-05	6.22855e-05	5.64112e-06	-1.53073e-06	6.36399e-05	6.55865e-05	7.79381e-05	2.3913e-05	5.56174e-05	4.72759e-05	7.54612e-05	3.3782e-06	9.79377e-05	6.92706e-05			9.89924	6.95887	3.79206	1.55348
	-1.69247	0.000281967	0.000274363	0.000305503	0.000305378	0.000270851	0.00030562	0.000224056	0.000242596	0.000248959	0.00024309	0.000301229	0.000276822	0.000303588	0.000272266	0.000327384	0.000269512	0.000273501	0.000299863	0.000297914	0.000244952		-1.69247	3.63899e-05	4.10725e-05	3.02713e-05	6.13934e-05	5.79577e-05	2.22988e-05	3.43576e-05	6.1104e-05	-1.2942e-05	1.90076e-05	6.38437e-05	6.2988e-05	9.1996e-05	1.43344e-05	1.57081e-05	6.18112e-05	6.45078e-05	3.78736e-05	7.80273e-05	3.14739e-05			9.92996	8.63105	3.84484	1.62339
	-1.68223	0.000300025	0.000276973	0.000317714	0.00027771	0.000305234	0.000283405	0.000214667	0.000234797	0.000270474	0.000244213	0.000300133	0.000269869	0.000334716	0.00024226	0.000292147	0.000278228	0.000279373	0.000307553	0.00027784	0.000222061		-1.68223	5.52344e-05	2.34484e-05	2.28062e-05	3.77139e-05	8.29976e-05	7.52829e-05	2.76651e-05	5.2457e-05	2.2434e-05	5.27353e-05	5.79554e-05	5.20847e-05	6.99243e-05	4.59568e-05	1.51933e-06	5.21494e-05	2.56436e-05	7.16085e-05	3.62195e-05	3.2277e-05			9.96068	11.101	3.69919	1.34352
	-1.67199	0.000304627	0.000277434	0.000303233	0.000274892	0.000305764	0.000247055	0.000231533	0.000245079	0.000303486	0.000243298	0.000265886	0.000273476	0.000335604	0.000280104	0.000246567	0.000275086	0.000275008	0.000310047	0.000278197	0.000213688		-1.67199	6.35604e-05	2.49863e-05	3.11793e-05	3.0843e-05	6.28568e-05	9.42902e-05	8.16007e-06	2.72452e-05	9.2974e-05	6.43796e-05	4.33967e-05	3.39884e-05	3.03607e-05	8.93145e-05	3.54263e-05	3.3899e-05	1.50428e-07	7.14911e-05	4.01461e-05	6.15104e-05			9.9914	14.398	3.76567	1.08589
	-1.66175	0.00028667	0.000270362	0.000266221	0.000279975	0.000286351	0.000237678	0.000247073	0.000246003	0.000307038	0.000250057	0.000225198	0.000277728	0.000324739	0.000310522	0.000252117	0.000275	0.000271432	0.000295227	0.000298168	0.000235777		-1.66175	6.15203e-05	3.94353e-05	3.40529e-05	4.53692e-05	2.3731e-05	5.15981e-05	3.75678e-07	2.51471e-07	0.00012349	4.64268e-05	1.55238e-05	1.99745e-05	2.38133e-05	7.97568e-05	6.66341e-05	2.60395e-05	1.95993e-05	5.33492e-05	8.16436e-05	6.3877e-05			10.0221	19.0763	3.81474	1.04204
	-1.65151	0.000258965	0.000270912	0.000243143	0.000273623	0.000274628	0.000243987	0.000258435	0.000245011	0.000268289	0.000269072	0.000209688	0.000275277	0.000337069	0.000288986	0.000292911	0.000275582	0.000274627	0.000260142	0.000304244	0.000276917		-1.65151	6.242e-05	5.55994e-05	3.0252e-05	6.23027e-05	3.09307e-05	1.95173e-06	1.6105e-05	3.05278e-06	8.19907e-05	3.10061e-05	-4.07681e-06	2.78155e-05	6.42037e-05	2.3276e-05	5.25224e-05	2.92622e-05	6.08579e-05	5.21648e-05	8.61507e-05	2.83417e-05			10.0528	25.4115	3.44186	0.299142
	-1.64127	0.000243799	0.000280302	0.000253239	0.000265289	0.000273531	0.0002398	0.000284584	0.000269305	0.00024403	0.000290488	0.000225347	0.00027136	0.00036368	0.000271915	0.00030245	0.000265109	0.000275241	0.000236014	0.000284233	0.000304586		-1.64127	6.32432e-05	6.76409e-05	2.98479e-05	6.55771e-05	8.06454e-05	7.8885e-06	3.49912e-05	3.7372e-05	3.14642e-05	3.47691e-05	1.84092e-05	5.21017e-05	0.000111192	-5.11086e-06	2.10574e-05	3.83127e-05	7.67554e-05	7.31411e-05	4.53568e-05	5.54529e-06			10.0836	33.5387	3.55592	0.0823677
	-1.63103	0.000250421	0.000279126	0.000277992	0.000277541	0.000274627	0.000243562	0.000321683	0.000313532	0.000271301	0.00030383	0.000259453	0.00027417	0.000364253	0.000293498	0.000278823	0.000246689	0.000274744	0.000254508	0.00027056	0.000303928		-1.63103	5.64563e-05	6.61858e-05	3.04226e-05	6.06668e-05	9.03773e-05	5.9562e-05	3.63137e-05	6.38699e-05	3.39532e-05	3.32936e-05	7.31913e-05	6.18518e-05	0.000121474	1.74981e-05	1.79113e-05	5.73298e-05	6.05223e-05	9.09889e-05	2.75603e-05	3.60574e-05			10.1143	42.8424	3.44978	-0.108659
	-1.62079	0.000268905	0.000264789	0.000285467	0.000301074	0.000272948	0.000274586	0.000335315	0.000329603	0.000305411	0.000306645	0.000293729	0.000278575	0.000330308	0.000306865	0.000280233	0.000235714	0.000284928	0.000298219	0.000290764	0.00028687		-1.62079	5.6415e-05	4.79453e-05	2.7882e-05	6.00401e-05	3.49388e-05	9.75732e-05	2.77733e-05	5.26002e-05	6.15357e-05	1.75115e-05	0.000104221	4.48454e-05	9.33323e-05	3.37922e-05	4.0758e-05	8.25821e-05	4.87421e-05	8.6619e-05	5.18162e-05	9.48289e-05			10.145	50.4997	2.86433	-0.544273
	-1.61055	0.000281117	0.000267457	0.000270243	0.000302488	0.000275273	0.000305415	0.000303629	0.00029142	0.000295888	0.000305314	0.00030786	0.000275047	0.000302826	0.000285605	0.000304723	0.000242521	0.000306862	0.000313847	0.000320576	0.000272847		-1.61055	7.59042e-05	3.15147e-05	3.28034e-05	6.08018e-05	3.98033e-08	9.15219e-05	2.68788e-05	2.4471e-05	5.7172e-05	2.55492e-05	7.89163e-05	3.0652e-05	5.63328e-05	1.23095e-05	5.84374e-05	9.24761e-05	6.29748e-05	6.80162e-05	6.30454e-05	0.000123241			10.1757	56.0029	2.53784	-0.953927
	-1.60031	0.000278101	0.000296057	0.000250061	0.000270255	0.000288242	0.000299154	0.000258984	0.000234139	0.000274046	0.000304952	0.000289985	0.00026009	0.000302086	0.000268502	0.000293202	0.000259194	0.000316651	0.000281497	0.000316474	0.000260288		-1.60031	9.2367e-05	3.72298e-05	5.02144e-05	4.84438e-05	4.23405e-05	5.83997e-05	3.30838e-05	1.86978e-05	2.91029e-05	7.02976e-05	3.22565e-05	4.3197e-05	3.41242e-05	-6.00341e-06	6.12546e-05	7.79717e-05	7.58996e-05	5.56765e-05	3.99642e-05	9.84977e-05			10.2064	58.5014	2.53269	-1.39936
	-1.59007	0.00026304	0.000309225	0.000244426	0.000239594	0.000307703	0.000273269	0.000255078	0.000212069	0.000284678	0.000305408	0.000254018	0.000244042	0.000304514	0.000273499	0.000252117	0.000274004	0.000302507	0.000246321	0.000282589	0.000239146		-1.59007	8.06342e-05	5.70887e-05	6.2451e-05	2.57327e-05	9.68666e-05	2.94589e-05	3.37525e-05	3.64419e-05	1.9837e-05	9.32884e-05	2.26826e-05	6.13361e-05	3.15212e-05	1.41123e-05	6.05939e-05	6.17502e-05	5.73165e-05	5.82252e-05	2.27049e-05	5.29091e-05			10.2372	57.5806	2.3795	-1.51346
	-1.57983	0.000247028	0.000278641	0.000257645	0.000247563	0.000314728	0.000265121	0.000293831	0.000228984	0.000306393	0.000297195	0.000230794	0.000237408	0.000298129	0.000268827	0.000251816	0.00027928	0.0002902	0.000256148	0.000269348	0.000216867		-1.57983	6.2079e-05	6.69092e-05	5.05062e-05	1.88301e-05	9.08451e-05	2.95275e-05	2.78385e-05	4.27737e-05	3.2253e-05	5.20004e-05	5.86602e-05	5.44563e-05	4.53188e-05	5.40815e-05	6.20235e-05	6.08948e-05	2.91584e-05	6.57267e-05	2.83051e-05	2.8386e-05			10.2679	54.9199	2.63066	-1.75824
	-1.56959	0.000238628	0.000245921	0.000282082	0.000285541	0.000301255	0.000275814	0.000315438	0.000249744	0.000297496	0.000276064	0.000238224	0.000244819	0.000311316	0.00024848	0.000293333	0.000274807	0.000310811	0.000295325	0.000293838	0.00021564		-1.56959	7.06761e-05	6.2566e-05	2.1529e-05	3.64665e-05	5.56829e-05	6.65379e-05	2.72244e-05	2.08602e-05	4.55692e-05	1.27058e-06	9.07058e-05	2.91982e-05	6.57323e-05	8.5061e-05	6.19627e-05	6.13379e-05	3.43576e-05	6.44085e-05	3.0813e-05	3.39454e-05			10.2986	50.5023	2.02382	-1.88749
	-1.55935	0.000242063	0.000253826	0.000301452	0.000309285	0.000281926	0.000279484	0.000284132	0.000261949	0.000270602	0.000251754	0.000261372	0.000260319	0.000348735	0.000246233	0.000301739	0.000261316	0.000339954	0.000313763	0.000309175	0.000233423		-1.55935	9.07665e-05	5.86242e-05	1.386e-07	4.44816e-05	5.08476e-05	0.000111855	3.44201e-05	-1.78549e-06	6.55211e-05	1.257e-05	7.66713e-05	8.66072e-06	7.15006e-05	9.55773e-05	6.06243e-05	5.48545e-05	6.03686e-05	5.09409e-05	2.82311e-05	5.14466e-05			10.3293	45.2409	1.89251	-1.85743
	-1.54911	0.000255318	0.000274056	0.000303364	0.00029872	0.000273141	0.000273593	0.000245616	0.000286562	0.00025234	0.000244119	0.000274231	0.000275887	0.00036622	0.000267941	0.000260635	0.000243522	0.000328661	0.000306611	0.000279304	0.000245911		-1.54911	7.8898e-05	6.07984e-05	5.21495e-06	2.11257e-05	6.29524e-05	0.00012055	3.49787e-05	8.54645e-06	0.000100901	6.09741e-05	3.70307e-05	-4.1721e-07	5.55769e-05	7.50739e-05	6.12542e-05	6.18558e-05	5.67135e-05	3.41147e-05	4.76235e-05	6.37766e-05			10.36	39.4822	1.50208	-1.94204
	-1.53887	0.000272444	0.000261928	0.000287685	0.000278378	0.000262442	0.000271455	0.000257407	0.000322799	0.000242538	0.000257005	0.000272123	0.000281156	0.00033581	0.000280458	0.000232151	0.000224677	0.000286522	0.000309397	0.000245483	0.000244618		-1.53887	3.67682e-05	6.22656e-05	3.73183e-05	9.32458e-06	5.10389e-05	8.86049e-05	2.4339e-05	4.41887e-05	0.000124169	6.8722e-05	2.53819e-05	5.51249e-06	4.74928e-05	2.80907e-05	5.85194e-05	8.50977e-05	2.91044e-05	2.55154e-05	8.47519e-05	6.50437e-05			10.3908	33.2087	1.25392	-2.708
	-1.52863	0.000280995	0.000243963	0.000266	0.000275659	0.000234559	0.000275316	0.000297186	0.000337135	0.000247431	0.000275179	0.000273357	0.000272485	0.000291966	0.00027551	0.000239889	0.000213178	0.000278017	0.000331338	0.000260815	0.000244831		-1.52863	1.16005e-05	6.13342e-05	7.37237e-05	5.14408e-05	2.26186e-05	5.63591e-05	2.36905e-05	6.85309e-05	0.00010194	2.89455e-05	5.48667e-05	3.67539e-05	7.2643e-05	-1.5323e-06	4.09085e-05	9.11284e-05	3.94627e-05	2.89616e-05	0.000103795	5.90482e-05			10.4215	27.436	1.05247	-2.64309
	-1.51839	0.000275706	0.000265354	0.000248721	0.000279518	0.000209807	0.00027592	0.000299173	0.000317851	0.000287362	0.000280015	0.000280957	0.000255034	0.000273986	0.000279212	0.00024511	0.000219279	0.000315477	0.000338866	0.000300961	0.000247166		-1.51839	2.74548e-05	6.14648e-05	7.83382e-05	9.74005e-05	4.43988e-06	4.22981e-05	4.50319e-05	6.65275e-05	4.68088e-05	6.82562e-06	8.16658e-05	7.80739e-05	9.84767e-05	2.48826e-05	1.19937e-05	7.03547e-05	9.50216e-05	3.49943e-05	9.4951e-05	5.72077e-05			10.4522	22.1902	0.923705	-2.59929
	-1.50815	0.000267521	0.000303587	0.000243891	0.000266769	0.000222281	0.000274179	0.000258607	0.000297597	0.000333002	0.000274002	0.000276641	0.0002424	0.000275652	0.000300236	0.000241175	0.00024876	0.000336363	0.000312355	0.000298266	0.00024025		-1.50815	5.52694e-05	6.13596e-05	4.15742e-05	7.12309e-05	-4.1342e-07	2.49517e-05	6.22314e-05	5.77286e-05	4.58687e-06	3.41476e-05	6.60784e-05	9.11833e-05	7.82211e-05	8.12966e-05	-2.48712e-06	6.21639e-05	0.000125097	3.20771e-05	7.85086e-05	6.47296e-05			10.4829	17.5463	0.516315	-3.20922
	-1.49791	0.000273876	0.000303939	0.00025928	0.000246761	0.000259296	0.000274119	0.000230062	0.000300615	0.000327282	0.000270336	0.000255778	0.000240667	0.000274878	0.000313639	0.00026156	0.000286438	0.000303757	0.00027014	0.000250782	0.000236016		-1.49791	6.15928e-05	5.94659e-05	3.57172e-06	8.89337e-06	1.05308e-05	1.61354e-06	5.09286e-05	5.88097e-05	4.45304e-06	6.71391e-05	2.19501e-05	7.26174e-05	3.6615e-05	0.000108708	1.67101e-05	8.29052e-05	9.30575e-05	2.42808e-05	6.35517e-05	6.78553e-05			10.5136	13.0573	0.38861	-3.43894
	-1.48767	0.000284661	0.000275192	0.000289977	0.000248204	0.000277561	0.000274321	0.000237917	0.000305598	0.000284557	0.000275476	0.000244122	0.000245047	0.000276707	0.000307322	0.000298742	0.000306252	0.000262897	0.000244925	0.000219904	0.000254615		-1.48767	5.46865e-05	6.11758e-05	8.75874e-06	1.56478e-05	4.73001e-05	5.50325e-06	3.24947e-05	6.31095e-05	3.72552e-05	5.72559e-05	-4.26484e-07	6.04416e-05	3.93379e-05	9.57467e-05	5.32094e-05	9.01246e-05	4.70017e-05	2.86916e-05	4.52426e-05	5.25119e-05			10.5444	9.50194	0.390717	-3.50771
	-1.47743	0.00027494	0.000263365	0.00030842	0.000268264	0.000273008	0.000272894	0.000255768	0.000286781	0.000280258	0.000278573	0.000249071	0.000245996	0.00029342	0.00029847	0.000305607	0.000294491	0.00026164	0.000255823	0.000240466	0.000275628		-1.47743	6.10986e-05	6.56436e-05	4.6314e-05	9.26012e-05	8.6609e-05	4.15856e-05	3.30079e-05	6.22811e-05	7.0469e-05	1.74951e-05	3.05489e-05	6.49193e-05	8.07245e-05	8.1623e-05	7.22351e-05	5.77577e-05	3.10755e-05	4.7997e-05	3.12323e-05	3.27943e-05			10.5751	6.78111	-0.112449	-3.58005
	-1.46719	0.000248858	0.000274984	0.000291331	0.000273474	0.000280862	0.000277154	0.000269898	0.000261283	0.000320682	0.000273233	0.000244681	0.000243021	0.000313084	0.0003037	0.00028031	0.000269623	0.000282642	0.000300854	0.000281994	0.000265198		-1.46719	7.27479e-05	6.09432e-05	6.99703e-05	0.000131552	8.4462e-05	6.48024e-05	3.38486e-05	6.04359e-05	7.44928e-05	3.57424e-07	9.03124e-05	5.61309e-05	8.55591e-05	8.97913e-05	6.45574e-05	2.69345e-05	3.00658e-05	6.11683e-05	3.04171e-05	3.55339e-05			10.6058	3.95713	-0.372356	-3.71503
	-1.45695	0.000244571	0.000279025	0.000254845	0.000253317	0.000302129	0.000292687	0.000289562	0.000264656	0.000333078	0.000269133	0.000220485	0.000241892	0.000313141	0.000311347	0.000264531	0.000262208	0.000284319	0.00034294	0.000304897	0.000243082		-1.45695	6.03532e-05	4.38452e-05	6.5554e-05	8.8677e-05	4.62807e-05	4.8296e-05	1.87298e-05	6.09773e-05	4.98638e-05	2.82688e-05	0.000111443	3.37235e-05	2.97829e-05	0.000100998	5.30295e-05	3.82144e-05	2.73658e-05	5.13373e-05	3.09019e-05	5.61292e-05			10.6365	1.22536	-0.173061	-3.7818
	-1.44671	0.000266099	0.000274538	0.000239727	0.00023942	0.000297631	0.000311607	0.000304945	0.000294263	0.000295182	0.000277018	0.000213843	0.000245315	0.000292882	0.000306225	0.000272547	0.000281026	0.000263849	0.000337009	0.000297385	0.000257213		-1.44671	3.275e-05	3.00699e-05	5.79564e-05	3.59257e-05	2.65064e-05	2.23284e-05	2.31514e-05	6.1377e-05	2.9294e-05	6.88484e-05	6.00715e-05	3.50293e-05	-2.11891e-05	9.35105e-05	5.84609e-05	6.80518e-05	3.78685e-05	3.121e-05	1.70737e-05	5.69163e-05			10.6672	-0.425042	-0.22262	-4.06963
	-1.43647	0.000273919	0.00028406	0.000261534	0.00025961	0.000260788	0.000314682	0.000294898	0.000309106	0.000267242	0.000282822	0.000244665	0.000246378	0.000275512	0.000296152	0.00027909	0.000301481	0.00024623	0.000283854	0.000274603	0.000296268		-1.43647	3.20363e-05	2.91022e-05	6.01277e-05	2.72089e-05	4.70596e-05	2.13421e-05	6.7386e-05	6.14974e-05	3.77525e-05	7.77623e-05	-4.69014e-06	5.73437e-05	-1.48533e-05	7.38684e-05	7.70264e-05	7.32985e-05	5.79549e-05	2.38383e-05	-2.94553e-08	1.99635e-05			10.698	-1.74467	-0.430706	-3.95847
	-1.42623	0.000252681	0.000307836	0.000294271	0.000296274	0.000233376	0.000292538	0.000276003	0.000284313	0.000273568	0.000268635	0.000275543	0.000242005	0.000279683	0.000304266	0.000275218	0.000304015	0.000246433	0.000243994	0.000261166	0.000300637		-1.42623	5.71134e-05	3.04809e-05	6.13295e-05	3.39197e-05	7.17685e-05	3.91204e-05	9.42315e-05	5.79276e-05	5.80215e-05	5.28993e-05	3.00166e-06	5.65451e-05	1.91306e-05	6.15042e-05	9.12231e-05	5.4302e-05	5.65619e-05	3.07231e-05	4.059e-06	-1.99212e-05			10.7287	-3.39016	-1.02864	-4.20958
	-1.41599	0.000245427	0.00031797	0.000306898	0.000309563	0.000237363	0.000258182	0.000280692	0.00024878	0.000265797	0.000246746	0.000266671	0.000240651	0.00029864	0.000327498	0.00027358	0.000300519	0.000263354	0.000260832	0.00027592	0.000260257		-1.41599	5.91369e-05	2.75829e-05	6.03485e-05	3.07238e-05	6.90584e-05	5.53744e-05	5.4856e-05	3.90398e-05	5.71189e-05	3.0311e-05	6.74572e-05	3.41953e-05	3.18017e-05	6.06211e-05	8.68802e-05	3.64353e-05	3.56622e-05	3.42103e-05	3.22593e-05	-1.50343e-05			10.7594	-4.2936	-1.17593	-4.40643
	-1.40575	0.000275953	0.0003004	0.000294671	0.000286903	0.000252535	0.000235957	0.000303008	0.000250124	0.000227059	0.00024745	0.000242291	0.00024725	0.000310611	0.000335698	0.000274953	0.0003095	0.000288691	0.000307528	0.00030132	0.000228253		-1.40575	3.23204e-05	3.24772e-05	6.48507e-05	3.67667e-05	4.96525e-05	6.51721e-05	2.90912e-06	8.29183e-06	3.7054e-05	3.48389e-05	9.0414e-05	3.60409e-05	2.96994e-05	6.12666e-05	6.36786e-05	2.88002e-05	3.34382e-05	3.04845e-05	5.85912e-05	3.05607e-05			10.7901	-4.89466	-1.62117	-4.28398
	-1.39551	0.000308938	0.000265821	0.000277152	0.00025266	0.000267175	0.000237307	0.000304657	0.000293745	0.000212519	0.000267413	0.000247705	0.000248848	0.0003077	0.000308573	0.000263307	0.000315257	0.000305608	0.000324998	0.000303934	0.000236233		-1.39551	3.55139e-05	4.94695e-05	6.45374e-05	5.65285e-05	3.42826e-05	6.59154e-05	1.27208e-05	-3.0806e-06	3.08006e-05	5.34838e-05	4.94725e-05	5.84488e-05	4.90013e-05	5.88839e-05	3.78995e-05	2.8209e-05	5.48622e-05	3.72989e-05	6.02844e-05	6.18952e-05			10.8208	-5.60974	-1.89272	-4.52603
	-1.38527	0.00031213	0.000240818	0.000276346	0.000228694	0.000288472	0.000253353	0.000277515	0.000328946	0.000252368	0.000273332	0.000279418	0.000237867	0.000300654	0.000273487	0.000244638	0.000291378	0.000293833	0.000301701	0.000282776	0.000258622		-1.38527	8.83775e-05	6.30744e-05	4.69397e-05	6.53972e-05	2.67811e-05	5.24633e-05	5.84346e-05	2.27395e-05	5.06866e-05	6.29774e-05	3.29834e-05	5.45659e-05	8.58951e-05	6.16574e-05	3.04323e-05	3.26894e-05	6.08737e-05	6.46584e-05	4.31465e-05	4.43726e-05			10.8516	-6.30782	-1.88347	-4.73841
	-1.37503	0.000303306	0.000248178	0.000298606	0.000215477	0.000304999	0.000269757	0.000249098	0.00031313	0.00029536	0.000255238	0.000291387	0.000235093	0.000302397	0.000273004	0.000245027	0.000253095	0.000256627	0.000274867	0.000275409	0.000271646		-1.37503	0.000125474	6.42494e-05	3.08726e-05	6.16614e-05	2.76511e-05	3.48229e-05	6.48678e-05	5.72487e-05	7.12428e-05	6.17511e-05	8.3101e-05	3.21078e-05	9.72406e-05	7.57643e-05	4.41553e-05	3.40802e-05	3.85864e-05	9.09423e-05	2.94203e-05	7.22107e-06			10.8823	-7.07019	-1.47913	-4.50166
	-1.36479	0.000293576	0.000285219	0.000320901	0.00021396	0.000296214	0.000278025	0.000243864	0.000266839	0.000288203	0.000239347	0.000268161	0.000260798	0.00031513	0.000308835	0.000274995	0.000247931	0.000232605	0.000276679	0.000293343	0.000284033		-1.36479	9.81395e-05	5.96868e-05	4.03907e-05	6.33951e-05	4.02398e-05	2.89913e-05	3.18868e-05	6.62746e-05	6.81014e-05	6.19571e-05	0.000126587	3.95228e-05	6.68361e-05	9.32554e-05	6.13748e-05	2.64687e-05	2.61489e-05	8.97664e-05	2.74925e-05	-6.63907e-06			10.913	-7.0675	-1.78682	-4.94702
	-1.35455	0.000263911	0.000311806	0.00031121	0.000236672	0.000277349	0.000276643	0.000257349	0.000244151	0.000250458	0.000240209	0.000243007	0.000295988	0.000332584	0.000328839	0.000304829	0.000285209	0.000258432	0.000296127	0.000305145	0.000301942		-1.35455	5.10693e-05	4.71442e-05	5.96577e-05	6.34566e-05	5.75785e-05	3.08784e-05	1.66875e-05	6.11176e-05	4.74169e-05	6.36978e-05	0.000111106	6.23308e-05	3.36993e-05	9.93255e-05	6.57424e-05	2.40861e-05	5.01093e-05	6.90631e-05	3.17847e-05	-9.4178e-07			10.9437	-7.57496	-2.21321	-4.68477
	-1.34431	0.000222505	0.000295525	0.000270465	0.000270794	0.000274548	0.000271148	0.000274776	0.00025127	0.000238174	0.00024745	0.00024805	0.000308865	0.00033632	0.000298256	0.000304248	0.000315215	0.000309023	0.000305024	0.00028918	0.00030584		-1.34431	4.53203e-05	2.28018e-05	5.59927e-05	4.62104e-05	6.54467e-05	2.85753e-05	3.07598e-05	7.13988e-05	3.17856e-05	5.60826e-05	9.02302e-05	4.50793e-05	3.58153e-05	8.98517e-05	6.09941e-05	4.1622e-05	7.99247e-05	6.20879e-05	4.35221e-05	-1.38911e-06			10.9744	-7.79581	-2.01899	-4.73286
	-1.33407	0.000217985	0.000257026	0.000244206	0.000277504	0.000276674	0.000272239	0.000281862	0.000246264	0.000266327	0.000260954	0.000268412	0.000305085	0.000312254	0.000251143	0.000281709	0.000295471	0.000315394	0.000291847	0.000272717	0.000281783		-1.33407	6.83253e-05	1.34843e-05	3.34375e-05	3.07226e-05	6.24243e-05	2.84657e-05	3.76572e-05	9.07934e-05	3.52282e-05	3.8627e-05	0.000108977	5.40237e-06	5.80771e-05	7.35567e-05	5.96083e-05	6.11678e-05	7.08814e-05	7.91158e-05	6.77411e-05	-1.85506e-06			11.0052	-7.78049	-2.35043	-4.48132
	-1.32383	0.000255056	0.000243873	0.000262839	0.000250732	0.000260576	0.000279604	0.000273813	0.000216836	0.000300263	0.000293292	0.00027401	0.00030844	0.000277314	0.000247791	0.000275364	0.000249952	0.000259527	0.000268768	0.000284953	0.000242387		-1.32383	7.21154e-05	4.66088e-05	2.16614e-05	4.22133e-05	5.90529e-05	3.64366e-05	3.03414e-05	8.9052e-05	5.50705e-05	2.52909e-05	0.000121736	1.04241e-05	6.50928e-05	5.85217e-05	6.11307e-05	5.09402e-05	2.7647e-05	9.31795e-05	9.0131e-05	1.46616e-05			11.0359	-7.90434	-2.44539	-4.51777
	-1.31359	0.000277472	0.000261862	0.000302281	0.000241984	0.000244425	0.000278257	0.000255063	0.000212454	0.000303859	0.000329086	0.00026939	0.000310127	0.000271992	0.000284987	0.000293416	0.000235459	0.000214187	0.000249725	0.000311807	0.000215291		-1.31359	5.45537e-05	8.86214e-05	2.93887e-05	6.07698e-05	6.06851e-05	3.51529e-05	3.74279e-05	6.27063e-05	7.21571e-05	2.62181e-05	8.87678e-05	5.20275e-05	6.09702e-05	4.30378e-05	5.07812e-05	1.40722e-05	-1.31893e-07	7.99545e-05	8.86243e-05	3.03859e-05			11.0666	-8.1376	-2.50032	-4.60412
	-1.30335	0.000258328	0.000280592	0.000318267	0.000276526	0.00025346	0.000260254	0.0002438	0.000258734	0.000280586	0.000330367	0.000280712	0.000284982	0.000297027	0.000306144	0.000305101	0.000266122	0.00024033	0.000244034	0.000317202	0.000216437		-1.30335	5.07393e-05	8.21889e-05	4.44118e-05	4.60454e-05	6.27772e-05	1.34225e-05	6.39996e-05	3.69627e-05	6.61957e-05	3.7951e-05	5.22587e-05	6.17909e-05	7.18207e-05	2.73512e-05	2.7044e-05	-1.24823e-05	1.83948e-05	5.48454e-05	6.94574e-05	1.97949e-05			11.0973	-7.67941	-2.4451	-4.49656
	-1.29311	0.000239844	0.000293219	0.000306017	0.00030508	0.000272659	0.000244697	0.000253647	0.000305191	0.000261987	0.000292429	0.000300802	0.000249668	0.000306468	0.000289141	0.000289658	0.000300571	0.000298513	0.000256698	0.000296819	0.000241215		-1.29311	7.1463e-05	4.20282e-05	6.0592e-05	2.79204e-06	6.16041e-05	-1.52617e-06	7.74218e-05	3.06341e-05	4.20703e-05	5.39973e-05	5.33632e-05	3.59944e-05	9.08286e-05	2.24903e-05	1.58405e-05	-7.20217e-06	5.67483e-05	5.05058e-05	6.03365e-05	8.35529e-07			11.128	-7.60638	-2.37026	-4.45493
	-1.28287	0.000256078	0.000317665	0.000287265	0.000280865	0.000282084	0.000251291	0.000278076	0.000291898	0.000270528	0.000253047	0.000303524	0.000245034	0.000281751	0.000271823	0.000273014	0.000300407	0.000310925	0.0002847	0.000277332	0.000266294		-1.28287	9.07691e-05	3.26179e-05	7.08775e-05	-2.11587e-05	5.97847e-05	1.96515e-05	5.62413e-05	4.24748e-05	2.97496e-05	7.2822e-05	6.24197e-05	3.20591e-05	8.80405e-05	3.5848e-05	3.65875e-05	1.35816e-05	6.50284e-05	6.76153e-05	6.3759e-05	6.02631e-06			11.1588	-7.9703	-2.1742	-4.06549
	-1.27263	0.000290487	0.000339255	0.00027464	0.00024449	0.000301863	0.000271469	0.000288228	0.00024199	0.000293614	0.000241764	0.000299025	0.000269458	0.000273578	0.000274399	0.000284138	0.000279003	0.000278653	0.000306123	0.00027539	0.000274686		-1.27263	8.74398e-05	5.5745e-05	6.12068e-05	-7.33236e-07	6.10077e-05	5.67074e-05	1.84597e-05	6.21254e-05	4.36959e-05	8.92362e-05	4.50642e-05	5.67527e-05	6.27658e-05	5.48624e-05	6.28359e-05	2.77666e-05	3.50182e-05	7.27661e-05	5.57903e-05	2.94383e-05			11.1895	-7.63484	-1.74325	-4.28698
	-1.26239	0.000321791	0.000318851	0.000267994	0.000257688	0.000335885	0.000281005	0.000269036	0.000220891	0.000305319	0.000252661	0.000313481	0.000277611	0.000317016	0.000270779	0.000310899	0.000275082	0.00025975	0.000297479	0.000277427	0.00027138		-1.26239	6.96733e-05	5.66464e-05	3.77096e-05	3.07781e-05	6.28331e-05	6.272e-05	-1.37172e-06	7.22439e-05	6.05662e-05	8.96409e-05	2.29726e-05	6.0931e-05	3.94254e-05	6.18552e-05	5.63225e-05	3.78414e-05	1.00466e-05	5.0432e-05	3.51247e-05	4.76366e-05			11.2202	-7.36352	-1.99113	-4.16855
	-1.25215	0.000346906	0.000264161	0.00027538	0.000306306	0.000337392	0.000275981	0.000243358	0.000247783	0.000295303	0.00026983	0.000320545	0.000251162	0.000366064	0.000249966	0.000317567	0.000298053	0.000273269	0.000262786	0.000270946	0.000274627		-1.25215	5.40475e-05	3.41596e-05	3.10034e-05	3.01433e-05	6.14141e-05	3.46412e-05	1.01391e-05	5.91105e-05	5.35943e-05	6.9096e-05	2.43215e-05	3.55542e-05	3.06416e-05	5.99413e-05	3.1957e-05	5.58388e-05	2.77566e-05	2.93476e-05	3.54434e-05	6.11943e-05			11.2509	-7.22971	-1.98235	-4.31423
	-1.24191	0.00034868	0.000234002	0.000293587	0.000324991	0.000285314	0.000264158	0.000249047	0.000285687	0.000276395	0.000281862	0.000278357	0.000219093	0.000356008	0.000247632	0.000297742	0.000317419	0.000283466	0.000234877	0.000268292	0.000282208		-1.24191	3.94427e-05	3.69602e-05	4.86436e-05	5.82202e-06	5.97472e-05	2.2179e-05	3.71907e-05	3.47243e-05	3.22763e-05	4.81603e-05	3.51363e-05	2.05396e-05	3.80051e-05	6.33521e-05	3.56525e-05	7.1743e-05	7.04464e-05	3.78259e-05	7.10392e-05	7.12335e-05			11.2816	-6.90599	-2.33653	-4.33542
	-1.23167	0.000308731	0.000257063	0.000305629	0.000303136	0.00024423	0.000246229	0.000283691	0.000306863	0.000258885	0.00027855	0.000222096	0.000212301	0.000303037	0.000281723	0.000276805	0.000309751	0.000274989	0.000235938	0.00028383	0.00027373		-1.23167	1.81956e-05	5.9092e-05	6.15593e-05	7.65516e-07	6.12657e-05	5.65584e-05	5.65312e-05	3.25742e-05	2.39964e-05	5.47169e-05	3.4011e-05	2.89205e-05	6.23951e-05	6.65425e-05	6.01169e-05	6.53478e-05	9.18664e-05	5.78443e-05	0.000102477	6.0298e-05			11.3124	-6.90362	-2.04626	-3.92174
	-1.22143	0.000256036	0.00029643	0.000305108	0.000288896	0.000265577	0.000223082	0.000309692	0.000310528	0.000244717	0.000258905	0.000222571	0.000226834	0.000269819	0.000316564	0.000277259	0.000286841	0.000268067	0.000250538	0.000302855	0.000240331		-1.22143	1.08066e-06	5.29224e-05	5.69473e-05	2.06083e-05	5.41354e-05	9.92176e-05	6.17173e-05	6.37677e-05	3.03938e-05	8.326e-05	2.76593e-05	3.54397e-05	8.0398e-05	5.35003e-05	5.37045e-05	4.7788e-05	7.8983e-05	5.9175e-05	8.48053e-05	3.41407e-05			11.3431	-6.78334	-1.82128	-3.72805
	-1.21119	0.000241571	0.000308645	0.000305254	0.000308331	0.000306131	0.000213484	0.000309364	0.00030287	0.000236513	0.00024433	0.000264186	0.000243052	0.000275881	0.000316389	0.000294401	0.00027495	0.000274831	0.000250285	0.000300229	0.000212482		-1.21119	5.63018e-06	3.13561e-05	6.42109e-05	3.05201e-05	2.95318e-05	9.35282e-05	6.17943e-05	9.57598e-05	2.55402e-05	9.45955e-05	2.87259e-05	3.11296e-05	5.75637e-05	3.37197e-05	1.51457e-05	5.62287e-05	6.10599e-05	5.51365e-05	3.55737e-05	3.20089e-05			11.3738	-6.67333	-2.04007	-3.97171
	-1.20095	0.000265567	0.000293251	0.000299172	0.000323753	0.000302965	0.000225449	0.000304199	0.000287068	0.000244153	0.000252473	0.000272927	0.000247295	0.000284418	0.000293536	0.000309298	0.000276039	0.000278671	0.000236505	0.000280476	0.000228033		-1.20095	2.49749e-05	4.19162e-05	9.89239e-05	2.40931e-05	1.23377e-05	4.96926e-05	5.98748e-05	8.97416e-05	-7.90706e-21	6.86186e-05	3.22225e-05	2.91067e-05	1.12112e-05	3.45214e-05	-6.97603e-07	8.98008e-05	5.90157e-05	7.46723e-05	1.90112e-05	5.69101e-05			11.4045	-6.69103	-1.88135	-3.75849
	-1.19071	0.000282501	0.000276602	0.000266036	0.000298085	0.000272128	0.000244153	0.000306381	0.000270912	0.000262616	0.000272152	0.000248557	0.00024421	0.000271869	0.000277297	0.000309552	0.000275306	0.000274389	0.000236363	0.000274309	0.000282362		-1.19071	3.53236e-05	6.27381e-05	0.000124113	3.4294e-05	3.381e-05	3.06341e-05	4.62551e-05	5.16079e-05	-1.76675e-05	3.42493e-05	3.0903e-05	3.06454e-05	2.21953e-06	5.44779e-05	1.97895e-05	9.5328e-05	6.1173e-05	9.56776e-05	5.63319e-05	5.86663e-05			11.4352	-6.62163	-2.25858	-3.38837
	-1.18047	0.000276696	0.000277522	0.000221387	0.000253556	0.000253156	0.000257994	0.000301025	0.000255355	0.000274882	0.000279653	0.00024941	0.000250067	0.000250905	0.00027347	0.00030157	0.000268993	0.00028027	0.000258112	0.000294677	0.000318482		-1.18047	3.20431e-05	4.11737e-05	0.000100809	6.03493e-05	6.76764e-05	5.19927e-05	1.99675e-05	2.5545e-05	1.67141e-06	2.4273e-05	3.38872e-05	2.83304e-05	3.85426e-05	6.1169e-05	3.30988e-05	4.77977e-05	5.69395e-05	7.06246e-05	9.19057e-05	2.14265e-05			11.466	-6.44019	-2.50177	-3.39758
	-1.17023	0.000276784	0.000298185	0.000218418	0.00024789	0.000242436	0.000275537	0.000283079	0.000240156	0.000274398	0.000275239	0.000272041	0.000274471	0.000244416	0.000273772	0.000300734	0.000273533	0.000309046	0.000275239	0.000316536	0.000297552		-1.17023	2.94613e-05	3.74648e-06	4.95266e-05	5.62673e-05	5.64611e-05	6.06518e-05	5.33117e-07	3.68355e-05	4.14215e-05	3.01711e-05	5.28985e-05	3.05673e-05	6.26696e-05	4.14998e-05	2.82038e-05	1.40972e-06	6.32189e-05	1.44383e-05	7.54049e-05	-1.04882e-07			11.4967	-6.5385	-2.49695	-3.60123
	-1.15999	0.000298593	0.00031899	0.00026729	0.000294419	0.000232993	0.000287672	0.000271097	0.000236113	0.000274921	0.000272509	0.000266306	0.00029255	0.000257628	0.000275911	0.000309641	0.000292891	0.000336883	0.000264744	0.000312285	0.000252661		-1.15999	3.07834e-05	8.05119e-06	2.31008e-05	1.68569e-05	9.99293e-06	2.79738e-05	4.48782e-06	5.95058e-05	6.18492e-05	2.96859e-05	7.47679e-05	4.64788e-05	5.66871e-05	2.08998e-05	3.92771e-05	1.35254e-05	9.38984e-05	-3.1387e-06	3.70926e-05	2.90084e-05			11.5274	-6.3657	-2.13267	-3.71195
	-1.14975	0.000316225	0.00031174	0.000314746	0.000346075	0.000249228	0.000271866	0.000271893	0.000249092	0.000278103	0.000274547	0.000245181	0.000273115	0.000278812	0.000276719	0.000311114	0.000305252	0.000332148	0.000245431	0.000288779	0.000248059		-1.14975	2.82807e-05	3.00722e-05	3.73864e-05	1.27356e-06	4.41408e-06	-1.02532e-06	2.22328e-05	5.69349e-05	5.9216e-05	3.00655e-05	6.94179e-05	6.15089e-05	6.65841e-05	2.37803e-05	6.12434e-05	6.00548e-05	0.000126006	4.12234e-05	3.32613e-05	6.77433e-05			11.5581	-6.03679	-1.70453	-3.23731
	-1.13951	0.000308841	0.000273789	0.000318588	0.000354559	0.000278189	0.000242032	0.000277756	0.000254332	0.000273316	0.000274206	0.000254664	0.000229123	0.000284543	0.000266778	0.000294259	0.000284928	0.000297056	0.000254073	0.000274985	0.00028565		-1.13951	2.87487e-05	1.62546e-05	5.931e-05	3.5548e-05	5.81143e-05	1.14532e-05	3.68121e-05	3.61986e-05	6.26799e-05	4.49863e-05	3.28704e-05	5.34789e-05	9.50265e-05	4.33967e-05	4.88156e-05	7.89731e-05	0.000122426	9.33463e-05	5.6387e-05	7.14862e-05			11.5888	-6.0373	-1.87093	-3.50948
	-1.12927	0.000294069	0.000244957	0.000297715	0.00032396	0.000267196	0.000247955	0.000293029	0.000234909	0.000266136	0.00027461	0.000274568	0.00021437	0.000269382	0.000248684	0.000276174	0.000243488	0.000272179	0.000293519	0.000276539	0.000305365		-1.12927	4.27866e-05	-1.91836e-06	5.77958e-05	6.62128e-05	9.42637e-05	3.18252e-05	5.11864e-05	3.27162e-05	7.21544e-05	6.10622e-05	2.22087e-06	2.85478e-05	8.17504e-05	5.92674e-05	9.38214e-06	6.08463e-05	8.21142e-05	9.96145e-05	6.36926e-05	5.84463e-05			11.6196	-5.81127	-1.91377	-3.56047
	-1.11903	0.000301474	0.000259265	0.000281337	0.00028847	0.000223157	0.000288625	0.000317714	0.000225823	0.000278628	0.000277395	0.000259853	0.000245092	0.000261359	0.000242229	0.000279362	0.000221279	0.000283756	0.000322991	0.000275768	0.000274349		-1.11903	5.95962e-05	3.40706e-05	3.9401e-05	5.02674e-05	6.4099e-05	1.8762e-05	7.40365e-05	5.14328e-05	5.52908e-05	6.24517e-05	6.35144e-06	1.70586e-05	2.37809e-05	5.86269e-05	3.64072e-06	3.95421e-05	4.22682e-05	6.03786e-05	5.97258e-05	5.95104e-05			11.6503	-5.51383	-1.3767	-3.38931
	-1.10879	0.000325623	0.000300421	0.000270668	0.000270378	0.000218794	0.000303529	0.000318952	0.000267559	0.000301909	0.00027443	0.000242445	0.000276817	0.000284714	0.000263641	0.00029859	0.000247027	0.000310975	0.000312296	0.000274397	0.000233538		-1.10879	7.32356e-05	8.8277e-05	2.81081e-05	2.45198e-05	2.33311e-05	-1.63818e-06	9.16147e-05	6.45099e-05	1.49329e-05	6.13467e-05	2.76863e-05	3.40485e-05	2.75011e-07	3.8982e-05	4.45039e-05	3.02798e-05	2.99744e-05	9.40202e-06	7.46929e-05	5.82994e-05			11.681	-5.08204	-1.32915	-3.45267
	-1.09855	0.00033629	0.000321504	0.000266717	0.000269763	0.000259494	0.000269213	0.000277347	0.000325248	0.000301935	0.000258914	0.000270831	0.000268151	0.000309796	0.000302962	0.000310646	0.000300876	0.00031547	0.000281662	0.000297713	0.000230097		-1.09855	6.44069e-05	8.2983e-05	2.92191e-05	3.86991e-05	3.45435e-05	2.01392e-05	8.48741e-05	6.23894e-05	1.5327e-06	6.72249e-05	3.51279e-05	5.78798e-05	3.76438e-05	1.08319e-05	7.75029e-05	2.72815e-05	3.25621e-05	-1.30317e-05	9.21504e-05	2.74775e-05			11.7117	-4.28796	-1.0593	-3.51396
	-1.08831	0.000321654	0.000307294	0.000286075	0.000277983	0.00027239	0.000241335	0.000241801	0.00032637	0.000279065	0.000243312	0.000304782	0.00023951	0.000293737	0.000332659	0.000308051	0.000337672	0.000300893	0.000272908	0.000329373	0.000251998		-1.08831	0.000877523	3.39409e-05	3.04749e-05	7.44479e-05	7.1802e-05	7.35869e-05	6.56515e-05	6.22587e-05	3.46242e-05	5.97884e-05	3.09931e-05	5.95007e-05	6.57435e-05	-1.72765e-06	6.94954e-05	3.14336e-05	2.83862e-05	1.9371e-05	7.38476e-05	-1.29814e-05			11.7424	-3.92326	-0.822202	-3.28546
	-1.07807	0.00030572	0.000282007	0.000322142	0.000280335	0.000246631	0.000256909	0.00026807	0.000270195	0.000278858	0.000238812	0.000275777	0.000231442	0.000254459	0.000332114	0.000296957	0.000331397	0.000308196	0.000284388	0.000313185	0.000255069		-1.07807	0.000222555	2.16247e-05	2.86862e-05	7.83969e-05	7.70328e-05	0.000101368	6.02732e-05	6.48104e-05	6.64657e-05	2.6602e-05	3.13461e-05	4.14529e-05	4.55018e-05	1.68614e-05	4.52887e-05	3.69127e-05	2.39435e-05	7.83461e-05	3.51082e-05	-1.81741e-05			11.7732	-3.73534	-0.687672	-3.15437
	-1.06783	0.000304954	0.0002745	0.00033884	0.000266071	0.000253333	0.000277217	0.000324738	0.000228307	0.000314648	0.000245208	0.000217132	0.00024902	0.000245894	0.000309777	0.000280028	0.000299867	0.000354334	0.000278183	0.000252695	0.000234789		-1.06783	-0.00191663	5.9736e-05	3.57674e-05	4.20108e-05	5.00859e-05	8.43054e-05	6.36961e-05	5.25574e-05	5.37257e-05	-1.7078e-06	3.11289e-05	2.92526e-05	2.74709e-05	5.39806e-05	3.22803e-05	2.83177e-05	3.75082e-05	9.51254e-05	2.11563e-05	1.80912e-05			11.8039	-3.41421	-0.780289	-3.35248
	-1.05759	0.000305386	0.000286702	0.00032007	0.000246449	0.000296567	0.000261717	0.000333278	0.000234932	0.000338133	0.000258425	0.000215139	0.00026768	0.000267109	0.000293995	0.000263858	0.000275853	0.000396843	0.000248606	0.000239822	0.000230307		-1.05759	-9.28545e-05	8.44232e-05	5.41515e-05	6.02863e-06	3.0427e-05	6.24193e-05	4.63359e-05	3.32564e-05	2.13342e-05	6.43796e-06	2.3778e-05	3.01709e-05	4.69908e-05	8.33764e-05	2.78823e-05	1.75769e-05	5.81684e-05	5.60633e-05	3.0058e-05	5.49648e-05			11.8346	-3.45763	-0.565625	-3.1508
	-1.04735	0.000289416	0.00030536	0.000290108	0.000250103	0.000294772	0.000239319	0.000288141	0.000251316	0.000308685	0.000277715	0.000271965	0.000275769	0.000274526	0.000302502	0.000269139	0.000276544	0.00038272	0.00024219	0.000309759	0.000262208		-1.04735	0.00397818	6.08141e-05	6.29059e-05	2.78375e-06	3.5049e-05	6.27675e-05	8.89141e-06	3.54971e-05	1.75399e-05	3.48341e-05	2.96434e-05	2.97486e-05	6.81276e-05	9.23048e-05	2.86655e-05	3.77868e-05	5.75825e-05	3.01914e-05	2.36502e-05	5.81575e-05			11.8653	-3.03483	0.0148841	-2.75601
	-1.03711	0.000274563	0.00031295	0.000274925	0.000285665	0.000236515	0.000252647	0.000255825	0.000247104	0.000255953	0.000287233	0.000303928	0.000276336	0.000269455	0.000315695	0.000295755	0.00029348	0.000314763	0.000276387	0.000365873	0.000298586		-1.03711	-0.000137257	2.03499e-05	4.40907e-05	2.23589e-05	5.23936e-05	5.43013e-05	-7.77967e-06	5.60713e-05	3.88117e-05	4.38603e-05	6.27191e-05	2.6238e-05	6.47274e-05	8.27917e-05	4.24537e-05	7.92408e-05	3.82109e-05	5.21721e-05	1.03132e-06	3.85163e-05			11.896	-2.21538	0.0566381	-2.34283
	-1.02687	0.000283858	0.000304287	0.000278685	0.000321735	0.000210894	0.00028606	0.000268537	0.000244846	0.000235462	0.000267912	0.000274644	0.000273261	0.000286707	0.000307281	0.000307574	0.000306711	0.000250653	0.000304851	0.000322871	0.000301798		-1.02687	-0.00697503	-5.59389e-07	1.58806e-05	3.58163e-05	6.64068e-05	1.26741e-05	1.99514e-05	6.01662e-05	4.23139e-05	2.54986e-05	9.19085e-05	3.55711e-05	6.1098e-05	6.3358e-05	6.00716e-05	8.93785e-05	2.89705e-05	6.22554e-05	-4.96325e-07	2.68562e-05			11.9268	-2.24625	-0.0214921	-2.53895
	-1.01663	0.000306241	0.000287139	0.000296585	0.000318921	0.000251139	0.000290978	0.000287009	0.000265515	0.000254839	0.000230094	0.000236214	0.000270919	0.000308231	0.000290057	0.000280177	0.000296125	0.000235147	0.000291969	0.000244823	0.000281468		-1.01663	0.00103272	-2.70383e-06	1.81325e-05	3.33361e-05	6.62228e-05	-1.47138e-05	5.99492e-05	3.88041e-05	2.06057e-05	4.42577e-06	7.59668e-05	5.53744e-05	6.50229e-05	5.0058e-05	5.05915e-05	5.51924e-05	3.24292e-05	2.28084e-05	3.0173e-05	2.92627e-05			11.9575	-2.1367	-0.234747	-2.48233
	-1.00639	0.000303856	0.000273274	0.000315486	0.000279046	0.000287926	0.000257185	0.000278389	0.000286194	0.000274114	0.00021247	0.000245691	0.000279154	0.000287358	0.000303202	0.000246532	0.000264187	0.000256097	0.00027468	0.000232766	0.000271156		-1.00639	0.0115705	1.392e-06	5.75275e-05	2.81202e-05	5.5656e-05	2.39611e-05	6.5202e-05	2.09012e-05	1.62962e-05	1.09778e-06	2.85082e-05	5.95943e-05	4.75088e-05	5.99019e-05	7.05382e-06	2.49632e-05	2.38205e-05	-5.16643e-08	5.90171e-05	3.03236e-05			11.9882	-2.19958	-0.221914	-2.26746
	-0.99615	0.00027008	0.000258602	0.000312744	0.000246572	0.000281461	0.000220312	0.000262533	0.000280747	0.000270663	0.000227941	0.000286709	0.000297029	0.000248443	0.00033725	0.000247551	0.000241038	0.000273253	0.000288502	0.000276169	0.000274077		-0.99615	-0.00257254	1.97089e-05	9.04609e-05	2.94456e-05	5.52294e-05	8.38905e-05	3.81788e-05	2.59285e-05	4.83318e-05	1.55304e-05	6.78171e-06	4.08893e-05	1.03085e-05	8.5083e-05	-2.65641e-05	2.64516e-05	4.16606e-06	4.4537e-05	6.09841e-05	2.86947e-05			12.0189	-1.73733	-0.151163	-1.91322
	-0.98591	0.000239867	0.000241985	0.000285579	0.000250732	0.000270896	0.000217487	0.000271253	0.000257634	0.000267365	0.000248718	0.00030479	0.000306538	0.00025541	0.000336165	0.000272531	0.000250511	0.000272599	0.000305275	0.000302531	0.000272754		-0.98591	-0.0179602	0.000164517	7.90177e-05	3.17147e-05	7.03768e-05	7.89941e-05	2.83023e-05	4.31751e-05	6.97116e-05	3.72955e-05	3.45082e-05	2.85739e-05	-3.02978e-06	9.20722e-05	-4.98613e-06	2.91105e-05	2.87725e-06	9.27329e-05	5.37047e-05	3.80994e-05			12.0496	-1.47516	-0.248545	-2.03711
	-0.97567	0.000248071	0.000244276	0.000271019	0.000270868	0.000275488	0.000252156	0.000295473	0.000244078	0.000287541	0.000249703	0.000277901	0.000291671	0.000296207	0.000283787	0.000281642	0.000271322	0.000271704	0.00029061	0.000305283	0.000271989		-0.97567	0.00593473	0.000986837	4.07893e-05	3.08996e-05	7.12053e-05	2.02248e-05	5.90151e-05	5.84392e-05	4.0494e-05	5.50015e-05	6.78196e-05	4.55988e-05	2.046e-05	6.38057e-05	4.7831e-05	1.05381e-05	2.2927e-05	7.38821e-05	6.25086e-05	5.6288e-05			12.0804	-1.31768	-0.0936504	-1.76777
	-0.96543	0.000283709	0.000284964	0.000296486	0.000275319	0.000265156	0.000295362	0.000305605	0.000251439	0.000307781	0.000241402	0.000239763	0.000257175	0.000304602	0.000243731	0.000274874	0.000272038	0.000279494	0.000274318	0.000310107	0.000281312		-0.96543	0.027936	-0.000366152	1.33332e-05	3.07564e-05	3.74747e-05	-4.57961e-06	9.0831e-05	6.62583e-05	1.8127e-06	6.29327e-05	5.6722e-05	7.19333e-05	4.21547e-05	2.9936e-05	6.23066e-05	-1.49003e-06	3.57582e-05	2.75259e-05	7.3495e-05	6.57969e-05			12.1111	-1.30228	0.00151657	-1.35339
	-0.95519	0.000307154	0.000331729	0.000331993	0.000272805	0.000244769	0.000311051	0.000292292	0.000270935	0.000287354	0.000240982	0.000229392	0.000223131	0.0002801	0.000263478	0.000280985	0.000266623	0.000279597	0.000288341	0.000302261	0.000280453		-0.95519	-0.0119459	-0.00195399	1.72669e-06	3.10227e-05	2.67549e-06	2.10976e-05	7.79042e-05	6.30665e-05	1.43925e-05	6.33887e-05	1.54084e-05	7.22426e-05	3.57506e-05	3.12496e-05	2.43839e-05	1.59038e-05	3.24803e-05	1.87595e-05	5.7636e-05	6.31581e-05			12.1418	-1.20922	0.0257737	-1.36721
	-0.94495	0.000295363	0.000328607	0.000326335	0.00028601	0.000257184	0.000288194	0.000275287	0.000282753	0.000233055	0.00024557	0.000248666	0.000211034	0.000272076	0.000307921	0.000305035	0.000286237	0.000261212	0.000305934	0.000265584	0.000254468		-0.94495	-0.0443114	0.00121217	-8.21747e-07	2.89837e-05	1.18707e-05	3.02456e-05	3.30401e-05	5.44063e-05	5.47243e-05	5.83361e-05	1.22431e-06	4.71945e-05	2.14217e-05	6.39986e-05	-2.73343e-08	3.86421e-05	2.94924e-05	3.18089e-05	2.93506e-05	5.51589e-05			12.1725	-1.37042	-0.452531	-1.55296
	-0.93471	0.000268235	0.000275116	0.000283189	0.00030381	0.000296448	0.000252788	0.000270261	0.00027668	0.000194582	0.000245437	0.000268812	0.00022942	0.000276712	0.000319002	0.000317354	0.000308759	0.00024461	0.000292945	0.000243732	0.000240367		-0.93471	0.0252804	0.00386524	2.20485e-05	2.97026e-05	5.18089e-05	5.80685e-06	1.64852e-06	5.87196e-05	5.26226e-05	4.29622e-05	3.22265e-05	3.02475e-05	2.61302e-05	8.17594e-05	2.9351e-05	3.7853e-05	3.05384e-05	2.9996e-05	3.50918e-05	3.73245e-05			12.2032	-1.78795	-0.0310551	-1.40423
	-0.92447	0.000260454	0.000239585	0.000254657	0.000298356	0.000308676	0.000240994	0.000274636	0.000265264	0.000201975	0.00024314	0.000274914	0.000261953	0.000258235	0.000303097	0.000304295	0.000289913	0.000251249	0.000271878	0.000271999	0.000269816		-0.92447	0.0802738	-0.00253637	6.95881e-05	3.37104e-05	6.70061e-05	6.40526e-06	-6.99007e-08	7.95785e-05	1.0918e-05	2.16079e-05	6.71401e-05	3.51282e-05	4.62545e-05	5.60287e-05	6.165e-05	2.42984e-05	3.23105e-05	3.30418e-05	7.44657e-05	9.99223e-06			12.234	-1.40495	-0.271294	-1.32852
	-0.91423	0.000284062	0.000267054	0.000269844	0.000277622	0.000282826	0.000262888	0.000276074	0.000272487	0.000242664	0.00024346	0.000274687	0.000277218	0.00024216	0.000298307	0.000282848	0.000250439	0.000270681	0.000270216	0.000310901	0.000303682		-0.91423	-0.076986	-0.00642037	9.32085e-05	3.15698e-05	3.99023e-05	4.80513e-05	1.3851e-05	9.21359e-05	-4.23923e-06	1.87846e-05	7.05554e-05	3.66208e-05	6.05988e-05	1.31152e-05	3.96588e-05	2.41066e-05	5.1451e-05	5.5761e-05	9.10421e-05	-1.64236e-06			12.2647	-1.44441	-0.360313	-1.29363
	-0.90399	0.000318838	0.000322548	0.000298882	0.000268055	0.000256167	0.000295115	0.000274603	0.000295192	0.000292368	0.000244042	0.000273562	0.000263408	0.000268476	0.000305838	0.00027445	0.000252146	0.000278134	0.000274857	0.000303171	0.000288049		-0.90399	-0.348922	0.00510989	0.000235448	3.075e-05	1.2612e-05	7.03657e-05	3.12378e-05	7.90109e-05	2.20868e-05	4.86579e-05	5.82285e-05	1.59559e-05	5.51908e-05	1.41974e-06	-2.34914e-06	4.07473e-05	8.88062e-05	5.75828e-05	5.95543e-05	1.55616e-05			12.2954	-1.54804	-0.407914	-1.21508
	-0.893749	0.000340687	0.000344388	0.000305875	0.000273534	0.000245534	0.00030765	0.00027495	0.000305451	0.000324176	0.000243672	0.000260204	0.000245422	0.000303199	0.000295378	0.000275389	0.000292319	0.000274999	0.000272179	0.00026465	0.000248173		-0.893749	-0.407328	0.0102887	8.05155e-05	5.60033e-05	2.39802e-05	4.24696e-05	3.91665e-05	6.16723e-05	4.08131e-05	8.4589e-05	5.76054e-05	-1.75499e-06	3.42102e-05	3.16673e-05	8.32877e-06	5.79978e-05	9.82343e-05	2.08088e-05	2.37418e-05	3.09244e-05			12.3261	-1.33922	-0.452976	-1.04779
	-0.883509	0.000341743	0.000325698	0.000296817	0.000282914	0.00023893	0.000288297	0.000274155	0.000290699	0.000313846	0.00024478	0.000236396	0.000249911	0.000295115	0.000269051	0.00027407	0.000308544	0.000275632	0.000277074	0.000254578	0.000243494		-0.883509	-0.18447	-0.00893908	0.000256265	9.46163e-05	5.6324e-05	1.17003e-05	2.94821e-05	6.91081e-05	3.32271e-05	9.02229e-05	6.12479e-05	1.60589e-05	1.87387e-05	6.7156e-05	6.99682e-05	5.95255e-05	5.22357e-05	-9.88939e-07	2.1671e-05	1.67173e-05			12.3568	-0.71555	-0.130362	-1.32434
	-0.873269	0.000329991	0.000306122	0.000303975	0.000302862	0.000241812	0.000252194	0.000260393	0.000274791	0.000276486	0.000245147	0.000230127	0.000269685	0.000274943	0.000261037	0.00027029	0.000284726	0.000275981	0.000283514	0.000286908	0.000271687		-0.873269	0.0237038	-0.0152638	7.46161e-05	9.4492e-05	6.39971e-05	2.26423e-05	2.84476e-05	9.16406e-05	2.81178e-05	6.99459e-05	4.68085e-05	5.35481e-05	2.80472e-05	7.26071e-05	0.000109044	4.0299e-05	3.33083e-06	2.9182e-05	3.34754e-05	-5.81125e-08			12.3876	-0.712689	-0.532332	-1.40943
	-0.863029	0.000314129	0.000307552	0.00032782	0.000330645	0.000261063	0.000229134	0.000242396	0.000274123	0.000269571	0.000241452	0.000256364	0.000279803	0.000288618	0.000280733	0.000276829	0.000265253	0.000261799	0.000265748	0.000312384	0.000283891		-0.863029	0.0193108	0.0157271	-0.000858591	5.06822e-05	3.48508e-05	5.47994e-05	6.83907e-05	9.1883e-05	3.12759e-05	5.19909e-05	2.2167e-05	6.40881e-05	5.2398e-05	5.68996e-05	8.31034e-05	1.79437e-05	1.18077e-05	7.3634e-05	3.24482e-05	1.84012e-05			12.4183	-0.738538	-0.831017	-2.17088
	-0.852789	0.000297662	0.000310516	0.000335837	0.000336275	0.000274756	0.000238923	0.000247583	0.000274428	0.000303289	0.000241118	0.000279853	0.000276371	0.00030548	0.000289643	0.000294465	0.000271174	0.000245129	0.000240547	0.000293038	0.000275113		-0.852789	-0.054338	0.0228336	-2.71165e-05	3.0212e-05	2.17615e-06	6.4015e-05	0.00010982	6.00478e-05	1.99485e-05	3.8008e-05	1.85817e-05	3.85429e-05	6.16579e-05	5.23796e-05	2.64962e-05	2.21928e-05	5.59511e-05	9.0939e-05	3.23638e-05	5.87744e-05			12.449	-0.746479	-0.590105	-1.70792
	-0.842549	0.000281431	0.00029575	0.000308683	0.000304612	0.00026221	0.000265322	0.000281038	0.000258556	0.000310344	0.000252964	0.000261146	0.000267964	0.000279075	0.000263578	0.00030586	0.000277585	0.00024859	0.000255044	0.000253706	0.000279618		-0.842549	-0.0274787	-0.0272529	0.00193483	6.41782e-05	-1.78102e-07	3.87224e-05	8.09006e-05	2.95209e-05	1.39252e-06	1.51397e-05	4.26195e-05	1.60916e-05	4.66965e-05	6.63551e-05	-2.41193e-06	5.15255e-05	8.19835e-05	9.22218e-05	4.93595e-05	8.49323e-05			12.4797	-0.655326	-0.452621	-0.995859
	-0.832309	0.000269849	0.000276843	0.000273751	0.00027452	0.000244767	0.0002754	0.000297545	0.000243624	0.000255734	0.000270502	0.000221896	0.000250147	0.000244505	0.000237506	0.000293247	0.000274886	0.0002723	0.00029507	0.000247533	0.000304668		-0.832309	0.0399843	-0.0350362	-5.27651e-05	9.19099e-05	2.80693e-05	3.91682e-06	1.06035e-05	3.1996e-05	4.74633e-06	-8.11719e-07	6.25001e-05	2.5553e-05	3.08149e-05	7.24765e-05	1.14189e-05	6.46451e-05	9.09683e-05	9.44755e-05	6.65858e-05	9.1879e-05			12.5104	-0.365376	-0.35752	-0.902728
	-0.822069	0.000269827	0.000278843	0.000263619	0.000281197	0.000243351	0.000266303	0.000263023	0.000251957	0.000213602	0.000278379	0.000218548	0.000215295	0.000250925	0.000255947	0.000268099	0.000276494	0.000293978	0.000301586	0.00028321	0.000317744		-0.822069	0.0390157	0.0515478	-0.00344829	6.49722e-05	6.44319e-05	-5.74734e-06	8.97193e-06	5.44537e-05	2.79795e-05	1.07725e-05	5.38492e-05	5.0086e-05	2.94031e-05	4.99618e-05	3.61105e-05	4.32007e-05	0.000101983	8.62987e-05	6.59158e-05	8.66078e-05			12.5412	-0.574336	-0.27158	-0.711175
	-0.811829	0.000282487	0.000298639	0.00027571	0.000306305	0.000244269	0.000272227	0.000215861	0.000277923	0.000248109	0.000275747	0.000256322	0.000185055	0.000275016	0.000295753	0.000261278	0.000276969	0.000304912	0.000278098	0.000316823	0.000304609		-0.811829	0.00369521	0.0618337	0.000637348	3.87853e-05	9.14536e-05	2.54185e-05	8.53801e-05	6.0359e-05	4.83107e-05	2.90566e-05	3.46598e-05	6.11891e-05	3.05694e-05	1.36161e-05	3.96629e-05	2.81526e-05	9.31261e-05	6.68488e-05	5.82015e-05	6.02736e-05			12.5719	-0.464874	-0.260942	-0.447282
	-0.801589	0.000299466	0.000305842	0.000281292	0.000312681	0.000235954	0.000299138	0.000221307	0.000297808	0.000303444	0.000272758	0.00028538	0.000191809	0.000274836	0.000301664	0.000283616	0.000259556	0.000307682	0.00028124	0.000314843	0.000283265		-0.801589	0.00273727	-0.150857	0.00598595	0.000216106	0.000101921	7.30229e-05	0.000122916	4.23249e-05	6.07507e-05	2.74373e-05	3.08839e-05	5.8627e-05	2.62411e-05	-2.35955e-06	2.58548e-05	5.40423e-05	5.34074e-05	6.29115e-05	5.87708e-05	1.90867e-05			12.6026	-0.900486	-0.237677	-0.486988
	-0.791349	0.000309605	0.000285381	0.000273286	0.000304263	0.000244724	0.000306234	0.000264493	0.000305899	0.000293684	0.000274109	0.000280792	0.00023772	0.000275736	0.000278945	0.000305527	0.000243775	0.000305168	0.000305076	0.000295915	0.000274426		-0.791349	0.0145759	-0.394456	-0.00150737	8.44409e-05	9.13868e-05	9.22535e-05	7.13564e-05	3.03267e-05	6.02842e-05	2.70603e-05	3.32082e-05	6.04197e-05	3.16364e-05	1.50988e-05	2.11506e-05	8.89453e-05	3.06399e-05	8.25371e-05	6.30796e-05	-4.65223e-08			12.6333	-1.34941	-0.460094	-0.329034
	-0.781109	0.000308295	0.000261298	0.000268226	0.000301486	0.000280244	0.000273093	0.000267738	0.000307733	0.000244729	0.000275625	0.000269141	0.000286824	0.000308415	0.000279654	0.000299445	0.000261128	0.00030084	0.000291335	0.000296169	0.000274473		-0.781109	0.00110153	-0.367157	-0.00930621	0.00035729	6.10141e-05	6.86134e-05	2.13273e-05	4.38182e-05	3.12754e-05	5.06767e-05	2.47617e-05	6.81386e-05	5.13235e-05	4.05761e-05	4.02582e-05	8.66428e-05	5.02404e-05	9.49272e-05	6.24228e-05	1.5334e-05			12.664	-1.69638	-0.668112	-0.327703
	-0.770869	0.000296725	0.000266208	0.00027648	0.000305668	0.00030567	0.000244291	0.000213343	0.0003032	0.00023753	0.00027519	0.000271844	0.000305401	0.000336621	0.000302643	0.000279463	0.000300507	0.000305629	0.00025097	0.00031896	0.000274459		-0.770869	-0.0168468	-0.11877	0.00336333	-0.000164937	2.88594e-05	3.11357e-05	3.81331e-05	6.49576e-05	-6.00754e-06	6.36603e-05	2.36647e-05	6.25936e-05	6.10284e-05	4.05441e-05	7.39014e-05	6.32261e-05	6.06458e-05	7.60159e-05	6.05138e-05	3.14474e-05			12.6948	-2.08235	-1.20915	-0.148463
	-0.760629	0.000279827	0.000293847	0.000282149	0.000306512	0.000292529	0.000254059	0.000176984	0.000288359	0.000275879	0.000267665	0.000276815	0.000285097	0.000312903	0.00029509	0.000275185	0.000318498	0.000313347	0.000252508	0.000336247	0.000273272		-0.760629	-0.0136231	0.0339187	0.0140888	-0.00104189	1.89204e-05	7.73647e-06	6.95063e-05	6.91031e-05	1.09989e-06	3.3821e-05	4.72839e-05	3.30048e-05	4.55549e-05	2.00703e-05	0.000100712	6.477e-05	2.72064e-05	4.37569e-05	6.15469e-05	2.88265e-05			12.7255	-2.75966	-1.47581	-0.0213848
	-0.750389	0.000266368	0.000307254	0.000270411	0.000304308	0.000273736	0.000275025	0.000209734	0.000269634	0.000294106	0.000247585	0.000275146	0.000245059	0.000269022	0.00025549	0.000279222	0.000306726	0.000302834	0.000293748	0.000324738	0.00027493		-0.750389	-0.0029417	-0.010304	-0.00628991	0.000537211	3.26494e-05	-5.71042e-08	6.71473e-05	5.73967e-05	4.70625e-05	1.32629e-06	6.42462e-05	4.78722e-07	2.95019e-05	1.90617e-05	0.00010205	8.98035e-05	-7.6143e-07	2.97094e-05	5.75116e-05	3.28941e-05			12.7562	-4.02028	-1.74667	0.125279
	-0.740149	0.000269607	0.000291159	0.000250018	0.00029355	0.000285871	0.000275508	0.000262603	0.000253052	0.000272221	0.000221885	0.000275082	0.000213516	0.000269345	0.000245428	0.000265093	0.000296155	0.000268729	0.000306547	0.000288824	0.000275399		-0.740149	-0.000148528	-0.0619048	-0.0198154	0.00218131	4.13153e-05	6.68175e-06	6.06271e-05	4.21323e-05	5.98818e-05	9.87587e-06	4.50045e-05	-1.53396e-06	4.11174e-05	4.95238e-05	8.03912e-05	0.00010093	1.48704e-05	3.46498e-05	3.96193e-05	5.46887e-05			12.7869	-4.31464	-1.98517	0.019873
	-0.729909	0.000294519	0.000274857	0.000244883	0.000266747	0.000306709	0.000275097	0.000264443	0.000240854	0.000247475	0.000213136	0.000276197	0.000214054	0.000316092	0.000285863	0.000244144	0.000304659	0.000242037	0.000282094	0.000252664	0.00027473		-0.729909	0.00117675	-0.00993442	0.00963827	-0.00113509	2.74196e-05	3.32196e-05	6.56721e-05	2.47348e-05	2.0452e-05	3.00107e-05	2.71758e-05	3.16207e-05	6.51529e-05	6.76567e-05	6.2411e-05	9.23447e-05	3.06616e-05	3.42067e-05	1.43889e-05	5.85681e-05			12.8176	-4.9978	-2.51598	-0.536146
	-0.719669	0.000328954	0.000283533	0.000259871	0.000240723	0.00028704	0.000283052	0.000223947	0.000238512	0.000244549	0.000227168	0.000265028	0.000244202	0.00034778	0.000322929	0.000254335	0.000305778	0.000249444	0.000269356	0.00024097	0.000284589		-0.719669	0.00558274	0.0448482	-0.00167754	-0.00371595	1.64168e-05	6.14998e-05	5.05049e-05	6.20957e-06	9.9231e-07	2.66071e-05	5.52086e-05	6.39149e-05	5.9472e-05	3.90625e-05	6.36685e-05	8.84203e-05	1.16358e-05	2.28884e-05	1.15439e-07	2.39795e-05			12.8484	-5.55218	-2.94291	-0.760805
	-0.709429	0.000348446	0.000302763	0.0002807	0.000252607	0.000232088	0.000271415	0.000204658	0.000247894	0.000247431	0.000243789	0.000246824	0.000276119	0.000324539	0.000315433	0.000292024	0.000274617	0.000280853	0.000274236	0.00026056	0.00031382		-0.709429	0.00703393	0.0277014	-0.147072	0.00253084	7.75079e-05	5.88991e-05	2.66718e-05	1.93428e-07	3.64911e-05	2.9853e-05	9.0914e-05	5.95998e-05	1.88089e-05	2.09925e-06	6.49174e-05	9.19023e-05	1.42785e-06	2.49044e-05	6.56378e-06	-1.77368e-06			12.8791	-5.83635	-3.43483	-1.68486
	-0.699189	0.000339963	0.000307444	0.000296589	0.000303643	0.000199213	0.000242386	0.000231319	0.00025107	0.000242864	0.000244939	0.000245512	0.000274966	0.000269765	0.000286151	0.000309961	0.000228454	0.000303578	0.000273328	0.000296541	0.000339532		-0.699189	0.0037672	9.65155e-05	-0.314757	0.00620993	0.00026288	3.3499e-05	5.05282e-05	1.54929e-05	6.14592e-05	5.83143e-05	6.84124e-05	2.48188e-05	-9.62634e-06	1.71712e-05	5.71619e-05	8.23465e-05	3.40706e-05	4.86433e-05	2.54431e-05	3.75865e-05			12.9098	-6.42941	-4.02819	-2.7165
	-0.688949	0.000310269	0.000304976	0.000308952	0.000344488	0.000225143	0.000249114	0.00026679	0.000237	0.000238581	0.000244193	0.000268983	0.000239046	0.000240659	0.000273564	0.000288181	0.00021404	0.000302936	0.000292829	0.000319893	0.00032611		-0.688949	0.00027232	0.00864779	-0.286599	-0.00451267	9.99019e-05	3.40089e-05	0.000108542	4.08486e-05	3.00501e-05	6.10521e-05	8.98501e-06	-1.50895e-06	1.10266e-05	7.53415e-05	7.38313e-05	6.02831e-05	6.50387e-05	6.28764e-05	4.376e-05	0.000113465			12.9405	-6.90492	-4.78769	-3.37526
	-0.678709	0.00027837	0.000308654	0.000311688	0.000332061	0.000279805	0.000292624	0.000276194	0.000231575	0.000247032	0.000257744	0.000289127	0.000207214	0.00026785	0.000281939	0.000256349	0.000242989	0.00028665	0.000349483	0.000311108	0.000274415		-0.678709	-0.00235188	0.0150733	-0.0677438	-0.00925526	0.000275105	7.10321e-05	0.000117195	5.84946e-05	-3.68163e-06	1.77812e-05	-9.53192e-06	6.07685e-06	5.13464e-05	0.00011251	0.000122828	5.07605e-05	5.18204e-05	4.66863e-05	5.85253e-05	0.000131102			12.9712	-7.08015	-5.52207	-4.35295
	-0.668469	0.000255767	0.000306443	0.000297223	0.000287942	0.000309066	0.000300615	0.000272644	0.000261487	0.000264738	0.000275195	0.000278768	0.000218389	0.0003246	0.000299673	0.000243595	0.000276511	0.000270817	0.000373091	0.000277039	0.000235016		-0.668469	-0.00348545	-0.00366486	0.0980769	0.00803867	-0.000286791	9.22672e-05	5.71275e-05	5.91992e-05	1.07118e-05	9.93023e-07	2.45343e-05	3.57152e-05	5.8681e-05	0.000100313	0.000137239	6.28508e-05	2.45306e-05	3.03057e-05	6.80375e-05	6.1005e-05			13.002	-7.50766	-5.53269	-5.17364
	-0.658229	0.000244716	0.000286453	0.000278481	0.000267734	0.000294784	0.000247676	0.000282825	0.00029902	0.00027553	0.000269559	0.000250462	0.000256233	0.000349848	0.000320577	0.000249389	0.000271663	0.000267302	0.000305156	0.000247081	0.000248078		-0.658229	-0.00307749	-0.0173309	0.077689	0.0135581	-0.000830048	6.26709e-05	5.73028e-06	4.22887e-05	3.37307e-05	5.06279e-05	4.88559e-05	5.77402e-05	3.70634e-05	6.6318e-05	7.40004e-05	7.32643e-05	2.22617e-05	4.35666e-05	6.37143e-05	-4.31687e-06			13.0327	-7.67425	-5.71197	-6.28416
	-0.647989	0.000240477	0.000274507	0.000274823	0.000283152	0.000264044	0.000209694	0.000301186	0.000300275	0.000262902	0.000240807	0.000242944	0.000276035	0.000316021	0.000335291	0.000267324	0.00023955	0.000280199	0.000220472	0.000238266	0.000292203		-0.647989	-0.00143335	-0.0106776	-0.00391047	-0.0133691	0.00085887	2.31147e-05	1.70156e-05	2.09505e-05	1.86048e-05	9.31944e-05	3.33956e-05	6.08301e-05	3.30632e-05	3.63566e-05	6.00072e-06	5.71707e-05	3.4814e-05	6.10127e-05	4.48997e-05	2.06324e-05			13.0634	-7.68199	-5.95306	-6.93308
	-0.637749	0.000243793	0.000289073	0.000277288	0.000287788	0.000245679	0.000239097	0.000306634	0.000279001	0.000235762	0.000216135	0.000261482	0.000272634	0.000261112	0.000323589	0.000291421	0.000225474	0.000298201	0.000219149	0.000243232	0.00031237		-0.637749	0.000506735	-0.00235536	-0.0121727	-0.0185998	0.00178254	3.06618e-05	5.40456e-05	2.0817e-05	-4.38038e-06	6.70355e-05	1.56917e-05	5.91006e-05	5.31085e-05	1.18224e-05	1.54597e-05	2.05064e-05	4.72578e-05	4.94519e-05	3.09156e-05	8.27371e-05			13.0941	-7.45903	-6.27938	-7.40426
	-0.627509	0.000256425	0.000305174	0.000269301	0.000256421	0.000246111	0.000286008	0.00030439	0.000275986	0.000227884	0.000214388	0.000274585	0.000277241	0.000241384	0.000282654	0.000305356	0.000251081	0.000306616	0.000270389	0.000252221	0.000293206		-0.627509	0.00187504	-0.00110517	0.0142689	0.0185753	-0.00171037	7.61136e-05	6.4078e-05	4.63035e-05	9.38091e-06	2.74593e-05	2.90012e-05	6.17243e-05	6.27196e-05	-2.16841e-07	5.77932e-05	-1.17511e-06	7.3767e-05	3.11737e-05	3.89627e-05	8.06888e-05			13.1248	-7.32818	-6.71646	-8.10983
	-0.617269	0.000274736	0.000294553	0.000267005	0.00023455	0.000261123	0.000288982	0.000309391	0.000280004	0.000258551	0.000219161	0.000269644	0.000284944	0.000261698	0.000243192	0.000295677	0.000289047	0.000305449	0.000278124	0.000272638	0.000272883		-0.617269	0.00223542	0.00152632	0.000165581	-0.0127533	-0.00298589	0.000101289	5.34372e-05	6.37266e-05	4.0482e-05	3.92119e-05	5.50653e-05	5.18931e-05	5.91013e-05	1.02022e-05	4.48409e-05	2.13772e-05	0.000111242	4.02628e-05	5.98827e-05	3.62041e-05			13.1556	-7.56171	-7.20818	-8.1035
	-0.607029	0.000282623	0.000273892	0.000289002	0.00026914	0.000286319	0.000267432	0.000309265	0.000258644	0.000297667	0.000210954	0.00027444	0.000265424	0.000281944	0.000241582	0.000277231	0.000306739	0.000305467	0.000245824	0.000298151	0.000283517		-0.607029	0.00161547	0.00624217	-0.0279588	-0.184548	0.0033701	0.000146031	5.7133e-05	4.92711e-05	4.40184e-05	6.29417e-05	6.13802e-05	1.93197e-05	6.67924e-05	2.89918e-05	3.03796e-06	7.36307e-05	0.000120759	6.04591e-05	7.01313e-05	4.35694e-05			13.1863	-8.06827	-7.283	-8.57333
	-0.596789	0.000273937	0.000259659	0.000307618	0.000324751	0.000305417	0.000266107	0.000282585	0.00023975	0.00030003	0.000202209	0.00028982	0.000238599	0.000279359	0.000267257	0.000270916	0.000304389	0.000306424	0.000242848	0.000305352	0.000304314		-0.596789	0.000488863	0.00668771	-0.0216795	-0.335704	0.00478792	0.000213607	7.24267e-05	3.05134e-05	1.89435e-05	3.69309e-05	4.5656e-05	-5.78014e-06	7.05115e-05	3.51603e-05	2.01237e-05	0.000103443	8.60913e-05	6.28948e-05	6.16916e-05	8.78869e-05			13.217	-8.14327	-7.01141	-8.85558
	-0.586549	0.000263775	0.00024223	0.000291122	0.000330209	0.000295972	0.000279355	0.000248237	0.000266751	0.000264393	0.000220927	0.000273306	0.000256147	0.000270366	0.000275562	0.000274359	0.000307631	0.00030276	0.000274101	0.000295603	0.000294649		-0.586549	-0.000620943	0.00330361	-0.000188957	-0.257592	-0.00584385	0.000137446	6.64056e-05	4.07417e-05	-7.81027e-07	-8.42344e-06	3.03475e-05	1.04367e-05	4.30421e-05	3.10833e-05	8.37276e-05	8.11038e-05	4.26655e-05	6.11736e-05	4.46627e-05	7.35486e-05			13.2477	-7.94556	-7.05408	-9.31795
	-0.576309	0.00027718	0.000227655	0.000271171	0.00028829	0.000260207	0.000278943	0.000244368	0.000303907	0.000233043	0.000258304	0.000216235	0.000298568	0.000271914	0.00025314	0.000272525	0.000325103	0.000301731	0.000285841	0.000305659	0.000257021		-0.576309	-0.00122296	5.8142e-05	0.00415702	-0.0205154	-0.00690984	0.000331257	3.82195e-05	6.01793e-05	7.49604e-06	-3.80786e-06	2.87709e-05	4.81418e-05	2.23427e-05	2.22085e-05	0.000103897	3.97549e-05	2.72903e-05	6.93972e-05	3.04263e-05	1.22189e-05			13.2784	-7.93818	-6.98273	-9.13266
	-0.566069	0.000311826	0.00024947	0.000298341	0.000267178	0.000231932	0.000273162	0.000270283	0.000283189	0.00023412	0.000275674	0.000182709	0.000296407	0.000277336	0.000243777	0.000273359	0.000337101	0.000309826	0.000274399	0.000334447	0.000236863		-0.566069	-0.0011595	-0.00246358	0.00156829	0.112638	0.00989859	-0.000481998	2.85586e-05	5.2495e-05	4.08097e-05	4.57933e-05	3.03888e-05	6.34037e-05	5.99183e-05	7.85043e-07	6.61967e-05	3.47118e-05	3.84211e-05	6.05408e-05	2.46187e-05	1.03513e-05			13.3092	-7.77506	-7.3263	-9.61552
	-0.555829	0.000337413	0.000293504	0.000354029	0.000293291	0.000235894	0.000288774	0.000286133	0.000224798	0.00025543	0.000259318	0.000209001	0.000254722	0.000276741	0.000273962	0.000295794	0.000322805	0.000311094	0.000279508	0.000334064	0.00025998		-0.555829	-0.000603378	-0.00350905	0.00737896	0.0620332	0.00984386	-0.000849236	5.0542e-05	3.24281e-05	7.98707e-05	7.32377e-05	1.79339e-05	5.91805e-05	0.000115294	-1.87156e-05	4.12378e-05	7.03105e-05	5.54959e-05	2.2054e-05	3.14877e-05	7.38447e-05			13.3399	-7.80856	-6.94326	-9.99304
	-0.545589	0.000328214	0.00030272	0.000372797	0.000319696	0.000254328	0.00032195	0.000276472	0.000205211	0.000272202	0.000238742	0.000247177	0.000249756	0.00026782	0.000305379	0.000333531	0.000295385	0.000292488	0.000307154	0.000294691	0.000296909		-0.545589	0.000113739	-0.00296797	0.0114423	-0.0119373	-0.0154137	0.00130222	6.23647e-05	3.7757e-05	9.72435e-05	4.85213e-05	-1.90517e-06	6.65482e-05	0.000111698	7.15439e-07	5.9401e-05	9.81348e-05	6.61111e-05	1.02923e-07	4.88408e-05	9.68593e-05			13.3706	-7.84643	-7.04244	-9.78759
	-0.535349	0.00030005	0.000276209	0.000344416	0.000311249	0.000252234	0.00033945	0.000265519	0.000236033	0.00027197	0.000237519	0.000249724	0.000290871	0.000250431	0.000288237	0.00034473	0.000290484	0.000275216	0.000319531	0.000274813	0.000307703		-0.535349	0.000665456	-0.00125618	0.00535053	-0.0033997	-0.0123313	0.00169792	4.09816e-05	5.89088e-05	7.36714e-05	9.72514e-06	1.38551e-06	7.20905e-05	6.90975e-05	4.8025e-05	7.64652e-05	8.37577e-05	6.52406e-05	2.7782e-05	6.18379e-05	4.81809e-05			13.4013	-7.9274	-7.28715	-10.2278
	-0.525109	0.0002909	0.000280541	0.000321593	0.000293371	0.000225537	0.000321662	0.000273639	0.000263947	0.000253951	0.000248747	0.000244703	0.00030331	0.000233369	0.000241376	0.000306413	0.000321079	0.000278864	0.000301976	0.000294875	0.000297303		-0.525109	0.000883462	0.000652484	-0.00218208	0.0193589	0.0170871	-0.00253035	2.97264e-05	5.62439e-05	2.05782e-05	1.19443e-06	3.81483e-05	4.12955e-05	6.38094e-05	6.01832e-05	6.18302e-05	4.32914e-05	5.14052e-05	6.3857e-05	5.27043e-05	9.61577e-06			13.432	-7.9805	-6.76131	-10.5918
	-0.514869	0.000310889	0.000323295	0.000332042	0.000300433	0.000209998	0.000286137	0.000284196	0.000272972	0.000231863	0.000262996	0.000262164	0.000262653	0.000238121	0.0002216	0.00025404	0.000357422	0.000280254	0.000278319	0.000303771	0.000300492		-0.514869	0.000727507	0.00194416	-0.00452593	-0.00462108	-0.0405403	-0.00265145	6.13285e-05	3.3386e-05	-1.96071e-05	1.95254e-05	6.93863e-05	1.82652e-06	8.93249e-05	2.31866e-05	3.77415e-05	9.86889e-06	3.39248e-05	5.73432e-05	2.64295e-05	2.35318e-05			13.4628	-7.64999	-6.99318	-10.5334
	-0.504628	0.000321859	0.000330029	0.000338563	0.000317307	0.000236448	0.000265345	0.00027513	0.000288218	0.000234136	0.000284859	0.000274766	0.000235511	0.000263093	0.000248532	0.000244529	0.000365265	0.000256333	0.000275934	0.000280786	0.000317761		-0.504628	0.000321289	0.00218952	-0.00458481	-0.0300445	-0.218484	0.004826	9.17452e-05	3.18915e-05	-1.24584e-05	3.69763e-05	5.36983e-05	1.65746e-05	7.90037e-05	-2.02648e-07	3.06594e-05	-4.7351e-06	3.1986e-05	2.59838e-05	1.42519e-05	4.18996e-05			13.4935	-7.38408	-7.32496	-10.5419
	-0.494388	0.000293274	0.00027575	0.00031139	0.000309878	0.000291438	0.000270064	0.000252179	0.000304886	0.00026943	0.000304637	0.000258175	0.000260062	0.000275762	0.000288078	0.00026988	0.00034641	0.000240383	0.000292612	0.000277447	0.00031204		-0.494388	-0.000117539	0.0014958	-0.00421606	-0.0177997	-0.333482	0.00416281	0.000227077	5.81006e-05	2.40508e-05	5.04833e-05	1.18414e-05	7.46679e-05	3.7283e-05	1.81749e-05	3.35049e-05	-4.50872e-06	5.32354e-05	1.78228e-05	3.81191e-05	3.37032e-05			13.5242	-7.49592	-7.01811	-11.1022
	-0.484148	0.000252288	0.000239703	0.000283768	0.000282171	0.000326767	0.000280204	0.000244258	0.000288646	0.00030265	0.000296615	0.00024157	0.000284691	0.000264931	0.000305792	0.000273425	0.000325928	0.000267742	0.000306547	0.000303445	0.000271437		-0.484148	-0.00040358	0.000342519	-0.00175814	0.00142087	-0.217515	-0.00799187	3.5803e-05	6.76407e-05	3.61992e-05	7.33659e-05	2.90852e-06	9.56543e-05	2.79023e-05	3.02591e-05	3.01268e-05	7.37353e-06	7.53208e-05	3.45195e-05	7.73421e-05	2.50304e-05			13.5549	-7.4915	-7.31081	-10.9096
	-0.473908	0.000247292	0.000272955	0.000300665	0.0002731	0.000313541	0.000277451	0.000259454	0.000247078	0.000293372	0.00026068	0.000243408	0.000260883	0.000269586	0.000294446	0.000246579	0.000311848	0.000302969	0.000297168	0.000298274	0.000243503		-0.473908	-0.000445221	-0.00069134	0.001112	0.00199171	0.0118046	-0.00562566	0.000378204	3.43037e-05	9.89746e-06	9.27998e-05	3.78429e-05	5.14601e-05	5.63635e-05	1.90354e-05	2.45772e-05	2.47093e-05	6.78815e-05	4.09843e-05	9.19989e-05	2.97308e-05			13.5856	-7.30913	-7.19753	-11.0331
	-0.463668	0.00026938	0.000316186	0.000331267	0.000291924	0.000272204	0.00026912	0.000275052	0.000225627	0.000253562	0.00023269	0.000242073	0.000217759	0.000308397	0.000269107	0.000246826	0.000294348	0.000290022	0.000264395	0.000254549	0.000271339		-0.463668	-0.000269259	-0.00117387	0.00290748	0.000906681	0.109222	0.0130853	-4.98758e-05	-6.09892e-06	-4.42377e-06	8.11785e-05	6.60346e-05	6.65222e-06	7.09368e-05	3.95309e-05	3.2436e-05	3.44429e-05	3.83604e-05	2.51517e-05	7.52759e-05	3.08614e-05			13.6164	-7.3856	-7.40108	-10.8924
	-0.453428	0.000270583	0.000301245	0.000309333	0.00030542	0.000245724	0.000271975	0.000265701	0.000243254	0.000229854	0.000236428	0.00023609	0.000208106	0.000335874	0.000247944	0.000285848	0.000277071	0.000249542	0.00022679	0.000250819	0.000329636		-0.453428	2.62082e-05	-0.00104796	0.00322164	0.00867983	0.0444484	0.00746337	-0.00112023	-1.05664e-06	2.70894e-05	4.50114e-05	5.22428e-05	1.79085e-05	6.21039e-05	0.000100355	5.19001e-05	3.20386e-05	2.82382e-05	6.1155e-06	5.77549e-05	2.98874e-05			13.6471	-7.18096	-7.27156	-10.5451
	-0.443188	0.000248264	0.000258146	0.000248034	0.000290658	0.000244246	0.000281123	0.000241426	0.000268602	0.000239945	0.000252651	0.000253273	0.000230179	0.000311898	0.000245314	0.000304687	0.000277861	0.000241389	0.000213471	0.000306491	0.000349139		-0.443188	0.000287143	-0.000500923	0.00219592	0.0115314	-0.0170272	-0.0203593	0.000315934	4.87993e-05	6.03034e-05	1.69497e-05	1.9127e-05	5.7265e-05	6.71902e-05	0.0001187	6.12077e-05	3.21787e-05	4.84819e-05	-9.43355e-07	5.82945e-05	4.26182e-05			13.6778	-6.92852	-7.05855	-9.86907
	-0.432948	0.000250079	0.000255604	0.000242898	0.000274815	0.000244915	0.000277924	0.000231578	0.000274605	0.000253906	0.000250948	0.000277128	0.000244473	0.000276093	0.000260544	0.000282905	0.000297898	0.000269853	0.000241299	0.000338687	0.000309686		-0.432948	0.000386673	0.000171606	0.000538437	0.00440239	-0.00144303	-0.00887651	0.00234074	9.22842e-05	4.27428e-05	4.21763e-06	9.33751e-07	6.62295e-05	9.03456e-05	5.44661e-05	4.7511e-05	5.10992e-05	6.1764e-05	-3.28021e-07	6.05838e-05	6.032e-05			13.7085	-6.50242	-7.21574	-9.99403
	-0.422708	0.000286541	0.000293828	0.000316404	0.000284881	0.000236558	0.000257924	0.000247842	0.000269589	0.000246858	0.000229267	0.000264105	0.000237827	0.000280824	0.000279125	0.000276889	0.0003132	0.000293825	0.000292394	0.00030331	0.00026599		-0.422708	0.000318631	0.00071	-0.00102574	-0.00231272	0.014144	0.0226065	-0.000824902	9.1685e-05	3.47537e-06	-6.94761e-06	2.39593e-06	4.15095e-05	9.28701e-05	-1.53232e-05	2.70849e-05	8.04899e-05	5.18683e-05	-3.87161e-07	4.56127e-05	6.35857e-05			13.7392	-6.89813	-7.23844	-9.99704
	-0.412468	0.000314217	0.000313464	0.000366244	0.000305126	0.000242284	0.000243807	0.000268816	0.000275317	0.000233174	0.000213036	0.000237986	0.000239632	0.000304801	0.0002825	0.000301664	0.000308683	0.000304251	0.000316658	0.000263269	0.000273512		-0.412468	0.000173059	0.000912067	-0.00184374	-0.00413287	-0.0122685	-0.0532709	-0.00412983	6.71321e-05	8.28184e-06	-6.66754e-06	1.72544e-05	2.87119e-05	6.2645e-05	-1.94698e-05	2.29065e-05	9.35125e-05	5.81746e-05	-1.6675e-06	2.1121e-05	6.11477e-05			13.77	-6.88196	-7.16378	-9.54212
	-0.402228	0.000311164	0.000286394	0.000316234	0.000307758	0.000273985	0.000260303	0.000274255	0.000283383	0.000241379	0.000225567	0.000263741	0.00026888	0.000289356	0.000268215	0.000299051	0.000298073	0.000311746	0.000288659	0.000266592	0.000306424		-0.402228	4.5418e-05	0.000703265	-0.00166427	-0.00456715	-0.0300198	-0.244759	0.0020177	0.000169415	5.55089e-05	2.22711e-05	4.31954e-05	4.63119e-05	3.34582e-05	8.6147e-06	3.37515e-05	8.05564e-05	9.93097e-05	3.17395e-06	4.50367e-06	7.31981e-05			13.8007	-6.10387	-6.43934	-9.48489
	-0.391988	0.000298681	0.000249496	0.000240939	0.000305316	0.000304577	0.000300638	0.00027037	0.00027226	0.000265627	0.00026342	0.000322452	0.000301948	0.000243777	0.000250217	0.000257418	0.000301953	0.00030622	0.000248555	0.000275094	0.000304918		-0.391988	-3.96345e-05	0.000259885	-0.000787192	-0.00426977	-0.0130846	-0.339351	0.00698803	3.36549e-05	8.30749e-05	5.67204e-05	6.28056e-05	6.1517e-05	3.07011e-05	1.03788e-05	3.82812e-05	6.32951e-05	0.000123034	1.93901e-05	-2.28011e-06	9.20314e-05			13.8314	-5.20107	-6.32861	-9.18098
	-0.381748	0.000284492	0.000250786	0.000245441	0.000318428	0.000301378	0.000317481	0.000278196	0.0002484	0.000275135	0.000292406	0.000327771	0.000303727	0.000232829	0.000242187	0.000248039	0.000313895	0.000282445	0.000252551	0.000255161	0.000274066		-0.381748	-8.66411e-05	-0.000152997	0.000257814	-0.00171993	0.00383485	-0.19044	-0.00374536	0.000413061	6.38799e-05	5.76411e-05	5.0143e-05	4.92076e-05	3.7189e-05	-5.93443e-06	2.48471e-05	6.10395e-05	8.53491e-05	3.7921e-05	-3.69876e-06	8.90976e-05			13.8621	-5.14443	-6.08394	-9.0088
	-0.371508	0.000258675	0.000289296	0.000312672	0.000336777	0.00027443	0.000279322	0.000297	0.000245774	0.000259154	0.000282332	0.000269616	0.000278393	0.00027781	0.000242274	0.000288196	0.000309467	0.000274555	0.0002912	0.000240855	0.000276119		-0.371508	-8.00536e-05	-0.000370442	0.000975405	0.00107223	0.00290713	0.040504	-0.0106147	-0.00020227	3.39103e-05	3.44739e-05	1.30527e-05	3.16409e-05	2.98805e-05	-6.86486e-06	4.97841e-06	6.25261e-05	3.10269e-05	3.89993e-05	8.60288e-06	5.92371e-05			13.8928	-4.70696	-5.78849	-8.88671
	-0.361268	0.00024153	0.000319937	0.00034886	0.000339194	0.000252	0.00022237	0.000305087	0.000266177	0.000244318	0.000248146	0.000227349	0.000254586	0.000318147	0.000246708	0.000302758	0.000279028	0.000295601	0.000307523	0.000261018	0.000308873		-0.361268	-9.46742e-06	-0.00038462	0.00119278	0.00286788	0.00294073	0.111502	0.00694412	-0.00121966	3.02895e-05	3.1852e-05	-5.16895e-06	3.15057e-05	2.00383e-05	6.47551e-06	2.36569e-06	4.97513e-05	2.7802e-05	1.92196e-05	4.26326e-05	3.12598e-05			13.9236	-4.16081	-5.35608	-8.92863
	-0.351028	0.000257111	0.000313205	0.000330874	0.000335443	0.000243895	0.000212967	0.000290353	0.00027346	0.000245413	0.000240088	0.000235993	0.000244613	0.000300778	0.000262076	0.000263397	0.000247011	0.000304742	0.000286063	0.000284368	0.000301015		-0.351028	9.7596e-05	-0.000236663	0.000942825	0.0031941	0.00988261	0.0333084	0.0158031	0.000675737	4.73149e-05	5.67005e-05	1.66564e-05	3.1368e-05	3.31178e-05	2.15377e-05	3.16436e-05	3.23203e-05	6.23238e-05	1.66048e-06	7.76544e-05	3.20845e-05			13.9543	-3.36146	-4.91834	-8.60344
	-0.340788	0.000275988	0.000291733	0.000307108	0.000337924	0.000241725	0.000243666	0.00026604	0.000254408	0.000243973	0.000273603	0.000249911	0.000240222	0.000253191	0.000285311	0.000243246	0.00024321	0.000272508	0.000267042	0.000280109	0.000241427		-0.340788	0.000174443	3.11924e-05	0.000389805	0.00213904	0.0100931	-0.0174011	-0.012069	0.00255406	6.13992e-05	6.5984e-05	4.60493e-05	2.00626e-05	5.88776e-05	4.03931e-05	8.208e-05	2.78199e-05	6.61909e-05	1.97087e-06	7.58115e-05	5.22927e-05			13.985	-2.88844	-4.41342	-8.09284
	-0.330548	0.000260079	0.000297004	0.000306086	0.000332969	0.000244573	0.00024366	0.00024825	0.000244228	0.000225612	0.000304249	0.000244931	0.000243755	0.000247491	0.000287396	0.000280949	0.00027085	0.000243363	0.000271692	0.000271699	0.000214262		-0.330548	0.000174691	0.000286395	-0.000206991	0.000444172	0.00206552	0.00664287	-0.0225912	-0.00141142	6.45652e-05	3.64889e-05	4.11591e-05	2.94795e-05	5.85235e-05	5.7807e-05	0.000119801	3.05932e-05	2.70695e-05	3.49554e-06	3.40842e-05	6.09413e-05			14.0157	-2.33044	-4.17224	-7.30598
	-0.320308	0.000241567	0.000326945	0.000309565	0.000303337	0.000247931	0.000197708	0.000244348	0.000260891	0.000213536	0.000288411	0.000249835	0.000258844	0.000297155	0.000251732	0.000313879	0.000300919	0.000264816	0.000272362	0.000292214	0.000250218		-0.320308	0.000113807	0.00038655	-0.00059533	-0.00107241	-0.00375883	0.0161266	0.0185396	-0.00437549	6.08226e-05	7.03089e-06	8.86532e-06	7.10574e-05	2.41658e-05	6.1147e-05	0.000112854	2.83006e-05	5.33904e-06	-7.58587e-06	4.89535e-07	4.64304e-05			14.0464	-1.17612	-3.66926	-6.67786
	-0.310068	0.000266105	0.000339145	0.000301884	0.000267656	0.000242645	0.000184594	0.000258909	0.000277526	0.000225299	0.000247531	0.000270529	0.000274757	0.000339818	0.000215138	0.000293483	0.000305947	0.000309621	0.00025193	0.000322623	0.000274908		-0.310068	4.34202e-05	0.000311539	-0.000609805	-0.00179285	-0.0047661	-0.0155922	0.00298085	0.00300371	4.83894e-05	2.60194e-05	-4.65761e-06	9.18199e-05	-2.47381e-06	5.91604e-05	6.15588e-05	3.00547e-05	3.65717e-05	-8.05445e-06	1.46258e-05	2.77699e-05			14.0772	-0.507691	-3.32719	-5.71922
	-0.299828	0.000302185	0.000312567	0.000284983	0.000258429	0.000234816	0.000244665	0.000288004	0.00027629	0.000246069	0.000230043	0.00027226	0.000277449	0.000319287	0.000229003	0.000261592	0.000280168	0.000311322	0.000238298	0.000317068	0.000251218		-0.299828	4.28326e-06	0.000159844	-0.000311936	-0.00160042	-0.00461345	-0.029864	-0.163766	0.00720622	4.4888e-05	7.57815e-05	2.20784e-05	5.27273e-05	9.33149e-06	6.66481e-05	6.03284e-06	4.5507e-05	7.22507e-05	2.28575e-05	5.30402e-05	2.39544e-05			14.1079	0.430624	-2.45653	-5.43606
	-0.289588	0.000295407	0.000278815	0.000272054	0.000284038	0.000249204	0.000309455	0.00030676	0.000275075	0.000259983	0.000243211	0.00024983	0.000274541	0.000260416	0.000285433	0.000264979	0.000244586	0.000265412	0.000260991	0.000272408	0.000249626		-0.289588	-4.7822e-06	2.4365e-05	8.83e-05	-0.000767343	-0.00341528	-0.0104655	-0.335321	-0.00535433	0.000181779	9.26499e-05	5.67283e-05	-2.26194e-06	3.59244e-05	6.79324e-05	-8.84329e-06	6.11388e-05	5.39623e-05	5.6731e-05	6.35241e-05	3.37032e-05			14.1386	1.08088	-1.62053	-4.68515
	-0.279348	0.000274438	0.000269331	0.000281577	0.000320272	0.00028492	0.000306916	0.000296876	0.000277914	0.000278057	0.000252639	0.000235815	0.000274772	0.000230623	0.000323798	0.000283677	0.000227243	0.000232813	0.000305671	0.0002425	0.00030366		-0.279348	-1.34526e-06	-8.36326e-05	0.000392785	0.000244809	-0.000553841	0.0034741	-0.280536	-0.0107286	7.88283e-05	6.05104e-05	5.9219e-05	-1.59476e-05	3.94539e-05	4.10755e-05	1.60753e-05	6.32538e-05	6.97074e-06	6.02069e-05	3.85779e-05	4.84851e-05			14.1693	1.82051	-0.855081	-3.30474
	-0.269108	0.00029526	0.000274302	0.000320926	0.000337894	0.000307317	0.000269613	0.000277711	0.000269961	0.00030005	0.000244241	0.000242065	0.000274305	0.000255155	0.000313943	0.000281817	0.000245182	0.000251456	0.000334334	0.000269274	0.000338601		-0.269108	8.22371e-06	-0.000149524	0.00050632	0.000988747	0.00197301	0.000857444	-0.0406392	0.00955434	0.000434433	3.07228e-05	3.55621e-05	2.05815e-06	2.81297e-05	5.98273e-06	3.39624e-05	6.12931e-05	5.84374e-06	5.71586e-05	1.83629e-05	6.70804e-05			14.2	2.77179	-0.0826587	-2.36656
	-0.258868	0.000333136	0.000272056	0.000360171	0.000324271	0.000294424	0.000261756	0.00027595	0.000264699	0.000303423	0.000235641	0.000247438	0.000270486	0.000294219	0.000290423	0.000261727	0.000281748	0.000280078	0.000323943	0.000325722	0.00030545		-0.258868	2.67132e-05	-0.000129046	0.000427711	0.00122804	0.00320449	0.00280478	0.113267	0.015844	-0.000187391	3.20832e-05	2.1476e-05	1.75367e-05	3.91533e-05	7.08773e-07	1.7183e-05	6.43624e-05	5.89368e-05	8.448e-05	2.65878e-05	8.59423e-05			14.2308	3.51779	0.908856	-1.74709
	-0.248628	0.000323419	0.000273383	0.000360425	0.000293032	0.000266903	0.000276885	0.000278917	0.000287752	0.000284789	0.000244796	0.000244635	0.000276449	0.00030408	0.000297396	0.000245425	0.000306132	0.000265959	0.000284338	0.000346394	0.000265		-0.248628	5.72563e-05	-1.61871e-05	0.000209785	0.000942732	0.00291594	0.0107493	0.0721788	-0.0161337	-0.00110457	3.0011e-05	2.86413e-05	3.36826e-05	7.23993e-05	2.35908e-05	-1.86051e-06	6.03301e-05	9.67949e-05	0.00011911	4.02332e-05	9.12675e-05			14.2615	3.91055	1.43249	-1.38833
	-0.238388	0.000278654	0.000290795	0.000325385	0.000272267	0.000249282	0.000267924	0.000262097	0.00031066	0.00027368	0.000263726	0.000243268	0.000293805	0.000285923	0.000326976	0.000250587	0.000307469	0.000225554	0.000247264	0.00031369	0.000267171		-0.238388	8.94141e-05	0.000120253	-1.36992e-05	0.000356457	0.00150668	0.0099716	-0.00822049	-0.0225639	0.000728776	5.69163e-06	3.65287e-05	5.58386e-05	8.10224e-05	4.44235e-05	1.61343e-05	4.20147e-05	8.15207e-05	0.000117624	3.36038e-05	7.53277e-05			14.2922	4.58737	2.15573	-0.433514
	-0.228148	0.000259305	0.000305085	0.000293023	0.000283165	0.000242192	0.000235762	0.000243692	0.000287779	0.000277291	0.00027484	0.000244236	0.0003064	0.000270379	0.000338368	0.000288322	0.000305199	0.00021513	0.000241678	0.000274463	0.000273974		-0.228148	9.72621e-05	0.000183432	-0.000124898	-0.000226647	-0.000184539	0.00170343	-0.00378121	0.0248672	0.00232014	1.50537e-06	3.17314e-05	5.94496e-05	4.2422e-05	5.75767e-05	5.31957e-05	3.04853e-05	5.53346e-05	9.46279e-05	1.96715e-05	5.43711e-05			14.3229	5.0983	3.31618	0.0165115
	-0.217908	0.000273662	0.000293659	0.000278763	0.000318355	0.000240121	0.000215038	0.000254616	0.000247829	0.000269944	0.000264801	0.000241805	0.00030583	0.000270954	0.000314547	0.000337288	0.00030798	0.00023601	0.000260975	0.000272415	0.00025399		-0.217908	6.41653e-05	0.000145549	-0.000133656	-0.00056825	-0.00143945	-0.00338227	0.0231506	0.0022031	-0.00152094	3.72875e-05	2.48694e-05	3.90469e-05	1.65392e-06	7.66368e-05	6.74379e-05	4.4134e-05	5.63773e-05	8.93413e-05	2.75474e-05	5.28323e-05			14.3536	5.98551	3.99641	0.343106
	-0.207668	0.000282581	0.000274902	0.00030034	0.000433514	0.000272087	0.000270099	0.000274621	0.000343183	0.000248071	0.000260131	0.00024365	0.000335505	0.000277712	0.000279892	0.000344818	0.000350371	0.000302769	0.000274364	0.000288123	0.000244436		-0.207668	1.49282e-05	6.28024e-05	-0.000105741	-0.000573364	-0.00185544	-0.00427868	0.000770458	-0.178753	-0.00394732	8.01431e-05	2.97078e-05	3.19307e-05	1.04861e-05	9.18402e-05	6.19231e-05	6.31396e-05	6.03245e-05	9.26298e-05	5.27528e-05	6.8239e-05			14.3844	6.96043	4.75057	1.09723
	-0.197428	0.000274801	0.000281351	0.000317883	0.000487073	0.000321246	0.000398607	0.000558721	0.000419605	0.000394365	0.00038508	0.000280402	0.000434192	0.000278717	0.000280463	0.000379465	0.000574916	0.000386849	0.000604199	0.000277496	0.000265288		-0.197428	-1.04386e-07	6.17583e-06	-3.29138e-05	-0.000308429	-0.00143617	-0.00460896	-0.0292952	-0.347337	0.00313207	0.000191878	4.50604e-05	5.20319e-05	4.95757e-05	7.71946e-05	6.41847e-05	5.36586e-05	4.19488e-05	7.79459e-05	6.19375e-05	7.08031e-05			14.4151	7.8009	5.04111	1.90687
	-0.187188	0.00102968	0.000296095	0.000703076	0.000413996	0.000605559	0.000291839	0.000458944	0.000521191	0.00068246	0.000306171	0.000247048	0.000432038	0.000715374	0.000254214	0.000301415	0.000239923	0.000400625	0.000346243	0.000833116	0.00071566		-0.187188	2.09037e-05	3.01202e-07	0.000121529	8.31193e-05	-0.000448573	-0.00350832	-0.020343	-0.271893	0.00636977	9.40612e-05	6.08878e-05	5.93049e-05	6.08748e-05	3.64606e-05	6.47195e-05	2.50902e-05	2.8246e-05	6.1722e-05	4.53048e-05	4.83549e-05			14.4458	8.77163	5.57384	2.29427
	-0.176948	0.000181263	0.00115863	0.000900704	0.000517859	0.00095219	0.000510769	-0.00016082	0.000560185	8.47601e-05	0.000676942	0.00102733	0.000766458	0.00102234	0.00100013	0.000693086	0.000240922	0.000671709	-2.25779e-05	0.000281503	0.00101157		-0.176948	3.04417e-05	1.64921e-05	0.000260481	0.000407737	0.000592551	-0.00070403	-0.000231589	-0.0220004	-0.00565943	0.000494178	6.78586e-05	2.72717e-05	3.87892e-05	3.67493e-06	3.74823e-05	2.68822e-05	4.58351e-05	6.39476e-05	3.08236e-05	2.91871e-05			14.4765	11.2226	6.00144	2.46967
	-0.166708	-0.00135271	0.000110316	-0.000960649	-0.000299713	-0.000765465	-0.000151073	8.43175e-05	-0.000593276	-9.14457e-05	-2.13532e-05	0.000178169	-0.000296667	-0.000875341	0.000431242	0.000503655	0.00022878	-0.000250107	0.000256181	-0.000860819	-0.000844267		-0.166708	1.92927e-05	3.18729e-05	0.000243564	0.000529123	0.00118992	0.00185078	0.00103574	0.119562	-0.00949298	-0.00021143	6.10401e-05	-9.69385e-06	3.05905e-05	-8.23321e-07	2.91722e-06	7.75788e-05	7.08505e-05	6.17295e-05	3.28544e-05	3.98138e-05			14.5072	14.9509	6.328	2.85584
	-0.156468	0.000516758	-0.00174915	-0.00100837	-0.000384354	-0.00127192	-0.000598023	0.000870531	-0.000497012	0.000586553	-0.000953402	-0.00177633	-0.00110072	-0.00111829	-0.00167445	-0.00108279	1.50838e-05	-0.00066489	0.000592195	0.000283726	-0.001068		-0.156468	3.34593e-05	5.59031e-05	0.000108251	0.000441218	0.00118538	0.00317485	-0.000765697	0.065824	0.00986553	-0.00116335	4.3352e-05	-1.18297e-05	5.17348e-05	1.36269e-05	8.0906e-06	0.000124897	7.04315e-05	4.59597e-05	3.05974e-05	5.97885e-05			14.538	20.036	6.65125	3.37012
	-0.146228	0.0033264	0.000881511	0.00307619	0.00176103	0.00261434	0.00131457	0.000507131	0.00217231	0.000707237	0.0010078	0.000572184	0.00156817	0.00284505	9.93263e-05	-0.000188445	0.000526966	0.00172375	0.000237881	0.0023956	0.0027595		-0.146228	7.68717e-05	9.73422e-05	1.0868e-05	0.00023477	0.000732592	0.00296545	0.00754807	-0.0107548	0.0138586	0.000889813	3.03295e-05	6.91907e-06	6.74601e-05	3.00474e-05	5.45149e-05	0.00011081	4.98969e-05	6.17882e-05	1.93767e-05	5.41871e-05			14.5687	27.4478	7.03552	3.58439
	-0.135988	-0.000578404	0.00428558	0.00255234	0.00160092	0.00300677	0.00193239	-0.000479963	0.00155088	-0.000255901	0.00255592	0.00426431	0.00277535	0.00279617	0.00423706	0.00308171	0.0010015	0.00211784	-3.74304e-05	5.12396e-05	0.00266289		-0.135988	9.05744e-05	0.000129935	-1.33347e-06	2.80821e-05	0.000125675	0.00161897	0.0121833	0.00189125	-0.0162961	0.00248846	3.8751e-05	8.88059e-06	6.27956e-05	3.7107e-05	9.43071e-05	5.46778e-05	3.30431e-05	0.000121948	3.22017e-05	3.37134e-05			14.5994	36.3042	7.15928	3.87371
	-0.125748	-0.00496779	-0.00120027	-0.00495417	-0.00255831	-0.00431202	-0.00195179	8.45684e-05	-0.00344993	-0.000275132	-0.00152099	-0.000688136	-0.0024665	-0.00450393	0.000289922	0.000803747	-0.000350653	-0.00259548	0.000333627	-0.00324241	-0.0044169		-0.125748	6.54037e-05	0.000116669	-3.78344e-06	-0.000114551	-0.000404588	-8.90375e-05	0.00586693	0.0274416	-0.0191795	-0.0017857	6.40768e-05	-7.52016e-06	6.5325e-05	3.06139e-05	9.37059e-05	2.7244e-05	3.29468e-05	0.00015267	7.313e-05	3.56063e-05			14.6301	45.332	7.15569	4.39793
	-0.115507	0.00217952	-0.00663176	-0.00306494	-0.00171249	-0.00408722	-0.00257913	0.00133442	-0.00168385	0.00104347	-0.00379997	-0.00674846	-0.00396089	-0.00354773	-0.00673203	-0.00496627	-0.00106245	-0.00271356	0.000533442	0.00101518	-0.00343012		-0.115507	6.47655e-05	6.64973e-05	-7.39585e-06	-0.000160456	-0.000651772	-0.00139309	-0.00120318	5.68481e-05	0.0233611	-0.00416353	7.70141e-05	-1.06095e-05	8.59445e-05	2.15489e-05	6.301e-05	4.79557e-05	5.12735e-05	9.99579e-05	9.13535e-05	5.68533e-05			14.6609	52.3289	7.16585	4.93219
	-0.105267	0.00858583	0.00347746	0.00951453	0.00548807	0.008429	0.00438907	0.000473436	0.00679852	0.000957158	0.00371046	0.00260128	0.00534552	0.00856806	0.00101807	-0.000168319	0.00170281	0.00550519	0.000210963	0.00594672	0.0083312		-0.105267	9.50797e-05	2.3564e-05	4.22687e-05	-0.000101254	-0.000514507	-0.00182081	-0.00344707	-0.0296572	-0.0107944	0.0036766	7.54572e-05	1.54251e-05	9.4177e-05	3.17387e-05	3.15271e-05	6.1874e-05	7.31179e-05	2.48513e-05	6.1413e-05	5.94146e-05			14.6916	56.5539	7.36157	5.13129
	-0.0950274	-0.00365337	0.01137	0.00496064	0.00320226	0.0066149	0.00465859	-0.00111512	0.00293462	-0.000858359	0.0066888	0.0116626	0.00674322	0.00562369	0.0118842	0.00909043	0.00262115	0.00469888	0.000136038	-0.00131632	0.00546009		-0.0950274	8.29626e-05	5.50487e-06	0.000112971	2.54118e-05	-0.00013641	-0.00139888	-0.0042839	-0.0187035	-0.192194	0.00676664	0.000150403	5.02925e-05	7.10274e-05	6.37533e-05	1.82916e-05	2.78954e-05	7.00304e-05	1.66419e-05	2.75836e-05	3.7075e-05			14.7223	57.8055	7.25163	5.57938
	-0.0847874	-0.0125893	-0.00585651	-0.0148457	-0.00834245	-0.0134529	-0.00680942	0.000169841	-0.0103417	-0.000642353	-0.00599478	-0.00453401	-0.00860904	-0.0135216	-0.00195382	0.000103497	-0.00226654	-0.00862151	0.000294925	-0.00835191	-0.0130465		-0.0847874	2.21269e-05	-1.0623e-06	0.00012541	0.00015876	0.000239306	-0.000458584	-0.00459658	-0.000159836	-0.344071	-0.00648751	8.27064e-05	6.67706e-05	3.97652e-05	9.39659e-05	3.08735e-05	-1.77844e-05	4.16464e-05	7.07435e-05	2.53825e-05	2.20738e-05			14.753	56.7002	7.04293	6.92332
	-0.0745474	0.00762823	-0.0166775	-0.00558901	-0.00349098	-0.0085022	-0.00600751	0.00238434	-0.00277944	0.00193318	-0.00937573	-0.0173171	-0.0091885	-0.00691106	-0.0179111	-0.0138258	-0.0031785	-0.00583564	0.000382429	0.00362543	-0.00658711		-0.0745474	2.77536e-06	7.38726e-06	9.5623e-05	0.000238352	0.00045837	0.000492227	-0.00237409	-0.000939725	-0.254301	-0.010048	0.000497758	6.38321e-05	2.93342e-05	0.000102043	6.43053e-05	-1.76991e-05	2.79037e-05	0.000117314	3.06087e-05	2.80883e-05			14.7837	53.388	6.90472	9.54425
	-0.0643074	0.0199021	0.0116224	0.0246613	0.0140184	0.0226563	0.0118169	0.000237092	0.0171827	0.00152952	0.0109539	0.00956526	0.0150467	0.02265	0.0055921	0.00184327	0.00441854	0.0148083	0.000211505	0.0135081	0.0219873		-0.0643074	4.47699e-05	4.39109e-05	9.09574e-05	0.000237768	0.000512785	0.0010709	0.000480637	-0.00193518	-0.0096591	0.0111347	-0.00034016	5.95403e-05	4.0965e-05	8.89908e-05	9.268e-05	2.01524e-05	4.19381e-05	0.000119606	2.5584e-05	3.54572e-05			14.8145	48.9568	6.35932	12.6217
	-0.0540673	-0.013337	0.026036	0.00721539	0.00481429	0.0119771	0.00874465	-0.00374897	0.00345716	-0.00289813	0.0142173	0.0271394	0.0136123	0.00950024	0.0285152	0.0221304	0.00474674	0.00841935	-0.00055459	-0.00644475	0.00915745		-0.0540673	5.7172e-05	7.23456e-05	9.46254e-05	0.000168359	0.000413978	0.00112908	0.00251336	0.00780806	0.117524	0.0145588	-0.00130885	6.08568e-05	5.85898e-05	6.01016e-05	7.96586e-05	3.71369e-05	3.86792e-05	8.93139e-05	3.5283e-05	3.19813e-05			14.8452	43.3336	5.70391	16.48
	-0.0438273	-0.0308905	-0.0203001	-0.0393538	-0.0205545	-0.0365119	-0.0178075	0.000872803	-0.0258294	-0.00210153	-0.0173703	-0.0170729	-0.0239541	-0.0369521	-0.0107898	-0.00428478	-0.00520671	-0.0226532	0.00128192	-0.0212743	-0.0358084		-0.0438273	1.34103e-05	4.54362e-05	5.21224e-05	7.13191e-05	0.000182209	0.000736056	0.00314724	0.0124416	0.0593134	-0.0184767	0.00101337	6.04871e-05	6.65847e-05	2.44277e-05	2.43102e-05	1.76469e-05	4.46638e-07	5.365e-05	5.91028e-05	2.57905e-05			14.8759	37.1864	5.14464	22.0336
	-0.0335873	0.027686	-0.0401151	-0.00724096	-0.00421052	-0.0152757	-0.010153	0.0117292	-0.00206777	0.00880011	-0.0190842	-0.0418115	-0.0181363	-0.0116476	-0.0444881	-0.0336007	-0.00300761	-0.00978059	0.00653053	0.014619	-0.011193		-0.0335873	8.75201e-06	2.95067e-08	1.97049e-06	4.34947e-06	-5.66099e-05	0.000158302	0.00237607	0.00593873	-0.0126727	-0.0203803	0.00263318	5.95292e-05	6.20849e-05	1.05577e-05	-1.65028e-05	1.56375e-05	-8.3097e-06	4.3924e-05	5.64374e-05	2.86505e-05			14.9066	31.2201	4.88222	29.2327
	-0.0233473	0.0594124	0.0402032	0.0671615	0.0193921	0.0631106	0.0200326	-0.00386146	0.030096	0.00718266	0.0258673	0.0338734	0.037262	0.0697722	0.0236241	0.0106253	-0.0049791	0.0289898	-0.00917651	0.0428609	0.0678187		-0.0233473	8.22079e-05	1.56869e-05	1.29081e-05	-1.34387e-05	-0.000182293	-0.000344985	0.000874156	-0.000715574	0.00108367	0.0275814	-0.00206681	6.94826e-05	6.33557e-05	4.12639e-05	7.24893e-06	6.5289e-05	5.56385e-05	7.19725e-05	3.12692e-05	5.56514e-05			14.9373	25.8557	4.32485	37.6908
	-0.0131072	-0.0781873	0.0727589	-0.0171167	-0.0730065	0.0021946	-0.0478963	-0.0833606	-0.0703022	-0.0490208	-0.00960003	0.0705897	-0.00859961	0.0166287	0.0781095	0.0446484	-0.0810426	-0.0441446	-0.0868686	-0.0434717	0.0162789		-0.0131072	0.000132012	7.6134e-05	5.96582e-05	-1.42082e-06	-0.00018915	-0.000576045	-0.00063873	-0.00284959	0.0231742	-0.00576175	-0.00438229	8.80008e-05	8.85552e-05	8.59178e-05	5.73743e-05	0.000117126	0.00011972	9.90773e-05	3.89046e-05	0.00011575			14.9681	20.4368	3.32334	45.6432
	-0.00286721	-0.298721	-0.115925	-0.27331	-0.262506	-0.24628	-0.232762	-0.206501	-0.27545	-0.165188	-0.194988	-0.112387	-0.215262	-0.223895	-0.0803514	-0.0908283	-0.227823	-0.243568	-0.212982	-0.21647	-0.218212		-0.00286721	8.04273e-05	8.53217e-05	7.43741e-05	3.00038e-05	-0.000130227	-0.000481559	-0.00155323	-0.00413158	-0.00437427	-0.194441	0.00416768	0.00018224	0.00011423	8.49975e-05	5.52583e-05	0.000111291	9.25838e-05	7.98256e-05	7.98145e-05	0.000171271			14.9988	16.1687	3.27029	52.1464
	0.00737282	-0.360759	-0.375361	-0.403234	-0.330156	-0.403919	-0.335349	-0.279288	-0.341358	-0.267052	-0.346589	-0.372325	-0.363997	-0.401242	-0.351709	-0.316965	-0.301484	-0.346706	-0.284339	-0.313447	-0.394117		0.00737282	-4.14874e-06	2.78174e-05	6.12309e-05	9.041e-05	-1.51545e-05	-0.000163004	-0.00164417	-0.00475444	-0.0303012	-0.351448	0.00705689	0.000131525	9.44618e-05	3.28527e-05	9.28944e-06	7.04668e-05	8.37977e-06	3.80447e-05	8.76054e-05	0.000156353			15.0295	12.6016	3.22879	55.1917
	0.0176128	-0.217238	-0.386948	-0.22078	-0.161741	-0.249637	-0.200567	-0.224585	-0.155254	-0.257336	-0.251455	-0.378936	-0.24192	-0.306079	-0.399989	-0.348757	-0.192545	-0.195709	-0.213636	-0.252589	-0.306942		0.0176128	-2.02e-05	-1.40575e-05	6.09839e-05	0.00016114	0.000145413	0.000207958	-0.00102861	-0.00267263	-0.0171534	-0.256944	-0.00729357	0.000441025	3.5426e-05	-8.14166e-06	6.46238e-06	5.44901e-05	-2.31603e-05	3.73959e-05	4.80914e-05	7.04903e-05			15.0602	9.01214	3.04663	56.1004
	0.0278529	-0.0689768	-0.146975	0.0476936	0.0573689	0.0270352	0.0290567	-0.0847374	0.0713012	-0.133639	-0.00401929	-0.117482	0.017663	-0.0867554	-0.157992	-0.119146	-0.00377868	0.0430897	-0.0575804	-0.129133	-0.0962271		0.0278529	2.73371e-05	-6.72921e-06	6.05592e-05	0.000183407	0.000243838	0.000443007	-6.15654e-05	0.000155858	0.0010616	-0.00544728	-0.0103873	0.000239273	4.27442e-08	6.07135e-06	6.29399e-05	6.14896e-05	2.56581e-05	7.71996e-05	3.00476e-05	1.6277e-07			15.0909	6.22715	1.99406	54.6356
	0.0380929	-0.048881	0.0325326	0.109159	0.10569	0.114354	0.110671	0.0166187	0.109846	-0.00675756	0.119824	0.0833966	0.125222	-0.00459249	0.0636771	0.099524	0.0773548	0.116373	0.0392433	-0.0600884	-0.0136045		0.0380929	6.21673e-05	2.12691e-06	2.97577e-05	0.00014039	0.000193114	0.000473543	0.000787331	0.00230351	0.000352261	0.121111	0.0125217	-0.00127536	1.43201e-05	4.28978e-05	9.31165e-05	5.03025e-05	8.21353e-05	9.0673e-05	6.7572e-05	2.40048e-06			15.1217	3.55981	1.31761	50.8921
	0.0483329	-0.0733038	0.00489636	0.0139874	0.0231968	0.0244152	0.0376585	0.0196636	0.0204796	0.0277804	0.0579841	0.0536515	0.0491933	-0.0556027	0.0560143	0.101187	0.0282513	0.0350398	0.0244352	-0.0472313	-0.0588186		0.0483329	4.8002e-05	-2.6461e-06	-1.38747e-06	8.91329e-05	6.21305e-05	0.000352539	0.00118913	0.00310865	-0.000143087	0.0586724	0.0150896	-0.000438656	3.06272e-05	4.59526e-05	5.69416e-05	3.10142e-05	9.22088e-05	5.28096e-05	0.00010387	3.1342e-05			15.1524	1.20596	0.476066	45.4842
	0.0585729	-0.0454914	-0.0580067	-0.0173464	-0.0184531	-0.0195732	-0.0181391	-0.0199262	-0.0151902	-0.00738731	-0.013245	-0.0290288	-0.0143661	-0.0652599	-0.0303846	0.00560722	-0.0241255	-0.0164809	-0.0225019	-0.0385188	-0.0667615		0.0585729	1.17119e-05	1.1754e-05	1.59555e-05	7.07455e-05	-1.29389e-05	0.000172814	0.00103435	0.0025079	0.0087927	-0.0128097	-0.020761	0.00274904	1.356e-05	1.83725e-05	2.66618e-05	4.68246e-05	7.37048e-05	2.01897e-05	8.50095e-05	2.48958e-05			15.1831	-0.760686	0.0189192	40.1287
	0.068813	-0.00184547	-0.0167491	0.0361616	0.00741016	0.0305385	0.00199146	-0.0322992	0.0163698	-0.0325114	0.00246875	-0.00212446	0.0125244	-0.00271904	-0.0125671	-0.00698674	-0.0169444	0.00991039	-0.0292596	-0.0244649	-0.00687953		0.068813	-1.00702e-05	3.18241e-05	6.88032e-05	5.86514e-05	1.30572e-06	6.98684e-06	0.000501078	0.00107258	0.0119164	0.004634	-0.0212982	0.000639444	3.99521e-07	1.37568e-05	5.89254e-05	8.68762e-05	6.11513e-05	4.05495e-05	3.49651e-05	-1.8761e-06			15.2138	-1.86939	-0.184562	34.3267
	0.079053	0.00312939	0.0443759	0.0472777	0.011635	0.0496335	0.014169	-0.0191943	0.0170514	-0.0240095	0.0240013	0.0544421	0.0314403	0.0298293	0.05041	0.0334142	-0.00297488	0.0197482	-0.0140446	-0.0192424	0.0249508		0.079053	-6.32998e-06	1.56878e-05	9.94554e-05	2.4317e-05	2.00983e-05	-0.000124512	-0.000102821	-0.000491202	0.0047738	0.0272265	0.0320615	-0.00502307	2.85879e-05	5.23342e-05	0.000106998	9.64583e-05	5.98897e-05	7.99229e-05	3.99735e-06	-7.30356e-06			15.2445	-3.28014	-0.313239	28.312
	0.089293	-0.00408753	0.0337374	0.000666924	-0.019797	0.00529437	-0.0148515	-0.0132019	-0.0194519	-0.0135752	-0.00491701	0.0366558	-0.00434418	0.0105845	0.0427505	0.0222476	-0.0165231	-0.0143961	-0.0136379	-0.015155	0.00827911		0.089293	1.62523e-05	-4.84671e-06	8.74648e-05	-1.80373e-06	-2.54625e-06	-0.000183806	-0.000516159	-0.00151581	-0.00171461	-0.00282867	-0.00103064	-0.000569494	6.77803e-05	8.90926e-05	0.000109317	6.58441e-05	6.1325e-05	7.70347e-05	-6.65878e-07	6.20773e-07			15.2753	-4.45713	-1.01121	22.6141
	0.0995331	0.00942361	0.00175548	-0.0208188	-0.0287344	-0.0212607	-0.0300989	-0.0138469	-0.0287984	-0.0141996	-0.0306536	-0.00675369	-0.0299975	0.00326888	-0.00122404	-0.0203373	-0.0241332	-0.0304053	-0.0172683	-0.00141178	0.00314674		0.0995331	5.00965e-05	3.48066e-05	6.54086e-05	1.04684e-05	-1.24051e-05	-0.000124032	-0.000608203	-0.00171366	-0.00355779	-0.0301664	-0.197252	0.00855745	8.62001e-05	8.43561e-05	7.57038e-05	3.659e-05	6.15356e-05	3.70653e-05	-9.30807e-08	-1.90404e-06			15.306	-4.98449	-1.18379	17.5104
	0.109773	0.0225091	0.00602752	-0.0054827	-0.00770751	-0.00742694	-0.0114114	-0.00425027	-0.0077435	-0.00882583	-0.0169326	-0.00802208	-0.0148297	0.0189836	-0.00675967	-0.025364	-0.00698423	-0.011244	-0.00522194	0.0121522	0.0194704		0.109773	8.31532e-05	0.000108662	6.20988e-05	3.4441e-05	4.07617e-05	3.95912e-05	-0.000411299	-0.00115715	-0.00442351	-0.0171059	-0.359011	0.000175127	0.000173146	6.35924e-05	4.28905e-05	3.05381e-05	6.12326e-05	2.25345e-05	2.69323e-06	2.88573e-06			15.3367	-5.72896	-1.35255	13.1753
	0.120013	0.0141091	0.0150953	-0.0023107	0.00421995	-0.0015576	0.00387592	0.00989617	0.00190797	0.00579892	0.000778353	0.00412134	-0.000177083	0.0175527	0.00609722	-0.00521488	0.00897801	0.00221793	0.0101944	0.0147192	0.0187378		0.120013	9.45153e-05	0.000132981	6.65534e-05	3.67294e-05	0.000112283	0.000202624	-4.59819e-05	-0.000201958	-0.00444433	0.000332792	-0.259573	-0.0135775	0.000897542	6.52247e-05	2.2631e-05	3.11817e-05	6.15926e-05	5.21222e-05	2.09831e-05	3.49967e-05			15.3674	-6.44486	-1.47511	9.55064
	0.130253	0.000212108	-0.00135839	-0.0137137	0.00116146	-0.0128172	0.00183896	0.0134883	-0.00215393	0.0137457	-0.000568483	-0.00701867	-0.00426474	-0.00251889	-0.00405755	-0.00220471	0.00882354	-0.00109033	0.0124594	0.0105949	-0.000542961		0.130253	7.32106e-05	0.000100413	5.64915e-05	2.92761e-05	0.00011641	0.000242198	0.000305408	0.000691609	-0.00204973	-0.00132626	-0.00171939	0.001137	-0.00045904	6.89209e-05	2.1655e-05	3.05461e-05	6.06955e-05	6.80792e-05	4.90184e-05	6.5572e-05			15.3981	-7.2745	-1.83081	6.19479
	0.140493	-0.00390537	-0.0169039	-0.00984797	0.00383667	-0.011003	0.00275024	0.00851925	0.00236753	0.0104269	-0.000857147	-0.0181117	-0.00318616	-0.0116921	-0.018269	-0.00757314	0.00634326	0.00124235	0.0076788	0.00605325	-0.0101406		0.140493	3.73492e-05	7.2111e-05	3.65924e-05	3.10706e-05	4.9452e-05	0.000155142	0.00049131	0.00116286	0.000751483	-0.00149369	0.123747	0.0212118	-0.00192929	3.82848e-05	4.52184e-05	4.08715e-05	4.95427e-05	3.32972e-05	6.19165e-05	5.6677e-05			15.4289	-7.69592	-1.79256	3.61625
	0.150733	-0.00487268	-0.0115643	0.00515118	0.0109084	0.00400001	0.0101288	0.00447743	0.0113475	0.00547811	0.00852627	-0.00807808	0.00831928	-0.00737244	-0.011062	0.000732056	0.00804414	0.0104309	0.00539966	0.0006996	-0.00711352		0.150733	1.28412e-05	6.3497e-05	3.17954e-05	2.74892e-05	-8.71034e-06	4.89353e-05	0.000468162	0.00106016	0.00265498	0.00848376	0.0573531	-0.00368932	0.00143165	2.35246e-06	6.46611e-05	6.1599e-05	2.48922e-05	-3.21089e-07	5.599e-05	2.01885e-05			15.4596	-7.7023	-2.02639	1.26912
	0.160973	-0.00773134	-0.00223272	0.00986008	0.00880329	0.0100752	0.00981141	0.0013976	0.00975271	0.00254321	0.0117917	0.00475222	0.012042	-0.00515722	0.00240323	0.0114836	0.00551856	0.0106289	0.00267252	-0.00500396	-0.00574364		0.160973	1.49817e-06	4.01611e-05	4.88011e-05	8.0825e-06	-1.22377e-05	2.88758e-06	0.000293767	0.000558301	0.00311667	0.0122115	-0.0130423	-0.0327063	0.00388264	1.39968e-05	4.43393e-05	7.16918e-05	2.4931e-06	2.06807e-05	5.77759e-05	-3.05136e-06			15.4903	-7.72547	-2.26184	-0.563129
	0.171213	-0.00712871	-0.000628711	0.00584397	0.000741232	0.0062449	0.00184495	-0.00345743	0.00182866	-0.00176908	0.00483286	0.00604582	0.00539555	-0.00512589	0.00515908	0.00976526	-0.00182268	0.00279696	-0.00307693	-0.00760443	-0.00591906		0.171213	-6.44629e-06	3.67122e-06	6.61897e-05	1.54679e-06	2.69149e-06	2.03491e-07	8.13179e-05	-2.31763e-05	0.00221893	0.00530907	0.00829434	0.00884098	-0.00286032	5.40385e-05	6.36103e-06	6.00155e-05	2.36854e-06	5.80463e-05	7.34048e-05	6.47658e-06			15.521	-8.00182	-2.33751	-2.21743
	0.181453	-0.00193864	0.0011754	0.00389861	-0.00342521	0.00388264	-0.00330327	-0.00679042	-0.00225762	-0.00613281	-0.00127546	0.00457179	-1.19026e-05	-0.000602973	0.00417626	0.00296417	-0.00595418	-0.00214974	-0.00673293	-0.00620604	-0.00142789		0.181453	-2.14308e-06	-1.10998e-05	6.60917e-05	3.2538e-05	-7.40512e-07	-2.36332e-06	-9.02843e-05	-0.000422406	0.00064992	-0.0009845	0.03133	0.0412903	-0.00647404	6.08137e-05	6.53725e-06	3.93243e-05	2.01632e-05	5.22557e-05	6.74653e-05	3.92407e-05			15.5517	-7.97384	-2.5392	-3.70824
	0.191693	0.00275737	0.00572674	0.00274909	-0.00390686	0.00289917	-0.00405578	-0.00555972	-0.00322433	-0.00638613	-0.00288592	0.00557161	-0.00168859	0.00485803	0.00580384	-1.19768e-05	-0.00513847	-0.00323573	-0.00543945	-0.00277882	0.00420449		0.191693	2.55606e-05	-1.14502e-06	5.8421e-05	7.8688e-05	6.61558e-06	3.85132e-06	-0.000177768	-0.000541507	-0.000833455	-0.00292443	-0.00114597	-0.0911487	0.00554747	3.53395e-05	4.75698e-05	3.06857e-05	3.27164e-05	3.06901e-05	2.64547e-05	7.09472e-05			15.5825	-7.77203	-2.92046	-4.57194
	0.201933	0.00470367	0.00669639	-0.000947515	-0.00407074	-0.000595295	-0.00411894	-0.0019126	-0.00416092	-0.00313551	-0.00381855	0.00403292	-0.00343642	0.00603279	0.00519919	-0.00167839	-0.00310536	-0.00406856	-0.00212283	0.000974278	0.00586731		0.201933	5.94134e-05	1.1515e-05	5.92249e-05	9.84232e-05	5.5462e-05	3.50219e-05	-0.000159598	-0.000410766	-0.00163923	-0.00424661	-0.029735	-0.313819	0.0101576	5.0496e-05	7.66009e-05	4.28561e-05	3.14386e-05	5.07548e-05	-5.39885e-07	7.46698e-05			15.6132	-8.13469	-3.36823	-5.54063
	0.212173	0.00490249	0.00346094	-0.00368098	-0.00270162	-0.00358839	-0.00305461	0.000967809	-0.00326975	0.000137204	-0.00402414	-0.000327856	-0.00421365	0.00449611	0.00104253	-0.0039515	-0.000914866	-0.0035074	0.0004893	0.00391917	0.00482752		0.212173	7.1618e-05	2.96909e-05	6.04381e-05	7.93452e-05	0.000105892	6.95501e-05	-4.94246e-05	-9.4136e-05	-0.00160762	-0.00465983	-0.0167856	-0.347186	-0.00984899	6.72745e-05	6.73649e-05	6.42322e-05	3.24882e-05	8.9021e-05	2.40357e-05	4.81937e-05			15.6439	-8.15098	-3.39013	-6.34838
	0.222413	0.00308485	0.000315302	-0.00378204	-1.73131e-05	-0.00385808	-0.000435406	0.00306364	-0.000798674	0.00246546	-0.00190966	-0.00290792	-0.00254147	0.00199827	-0.00206294	-0.00385105	0.00174735	-0.0010903	0.00275361	0.00447951	0.00256083		0.222413	6.16759e-05	6.36436e-05	4.36479e-05	4.37427e-05	9.55073e-05	8.62019e-05	9.95201e-05	0.000269267	-0.000906259	-0.00244294	-0.000288072	-0.121491	-0.0151288	0.000799195	5.00933e-05	7.10845e-05	4.84827e-05	8.69096e-05	5.95949e-05	2.74842e-05			15.6746	-7.53468	-3.48267	-6.91711
	0.232653	0.000672486	-0.00212627	-0.00223768	0.00213814	-0.00240905	0.00185042	0.00368862	0.00148947	0.00365306	0.000619459	-0.00358202	-0.00015571	-0.000588194	-0.00337506	-0.00189242	0.00325678	0.00130488	0.00357623	0.00347534	-4.32887e-05		0.232653	4.57071e-05	9.2071e-05	1.86618e-05	2.58036e-05	3.35444e-05	9.46248e-05	0.000202158	0.000509383	6.91422e-05	0.000363268	-0.00304717	0.0970603	0.0170365	0.000372089	5.63898e-05	5.78863e-05	6.77519e-05	6.24144e-05	5.4307e-05	4.03826e-05			15.7053	-7.23197	-3.78243	-7.54478
	0.242893	-0.00149661	-0.0031124	-5.32134e-05	0.00304869	-0.000258381	0.00298201	0.00283857	0.00279526	0.00320983	0.00238508	-0.00267515	0.00184114	-0.00234461	-0.00299824	0.000448655	0.00321942	0.00272823	0.00291185	0.00135396	-0.00201151		0.242893	3.0347e-05	8.7394e-05	1.93126e-05	4.47752e-05	-5.68037e-06	0.000100157	0.000209219	0.000517345	0.000869451	0.00239306	-0.0029887	0.101662	0.0224114	-0.00181983	7.84765e-05	5.05056e-05	6.9608e-05	6.94866e-05	3.1279e-05	6.13164e-05			15.7361	-7.11271	-3.43519	-7.69642
	0.253133	-0.00246177	-0.00261689	0.00172679	0.00265821	0.00156292	0.00279855	0.00117191	0.00281158	0.00171155	0.00292618	-0.00082161	0.0027712	-0.00268601	-0.00145414	0.0022274	0.00198842	0.00284005	0.00136961	-0.000679459	-0.0026662		0.253133	2.1619e-05	5.9573e-05	4.93365e-05	7.80119e-05	1.66204e-05	7.96341e-05	0.000142935	0.000322916	0.00118424	0.00307711	0.00800815	0.00679538	-0.0291964	-0.000415986	9.16734e-05	6.65556e-05	5.18558e-05	9.15437e-05	3.8291e-05	5.24958e-05			15.7668	-6.83241	-3.09776	-8.36545
	0.263373	-0.00216921	-0.00105053	0.00252057	0.0014484	0.00243885	0.00164835	-0.000544116	0.00182177	-5.84833e-05	0.00229593	0.00108495	0.00246724	-0.00179123	0.000449432	0.00278003	0.000277808	0.00191093	-0.000312224	-0.00194478	-0.00203233		0.263373	3.19356e-05	3.79348e-05	6.59616e-05	7.65678e-05	5.59584e-05	2.86046e-05	6.13759e-05	7.38015e-05	0.000934455	0.00242407	0.0124346	-0.00781196	-0.0338213	0.00388842	8.45176e-05	7.64901e-05	3.34542e-05	7.47453e-05	6.1111e-05	3.09384e-05			15.7975	-6.58345	-2.87926	-8.73082
	0.273614	-0.000921582	0.000648406	0.00224193	1.23444e-05	0.00224136	0.000166235	-0.00163949	0.000359853	-0.00140425	0.00100233	0.00222455	0.00129985	-0.000285212	0.0018939	0.0022012	-0.00109769	0.000515138	-0.00146235	-0.00207352	-0.000612317		0.273614	5.35162e-05	3.01715e-05	4.45198e-05	3.17145e-05	5.28355e-05	-1.39161e-05	7.13205e-06	-0.000109868	0.000353761	0.000949265	0.00588857	0.0316379	0.0538384	0.000540202	6.42145e-05	5.03824e-05	3.34229e-05	3.07678e-05	5.59721e-05	4.28048e-05			15.8282	-6.78456	-2.77655	-8.69156
	0.283854	0.000517693	0.00178068	0.00128496	-0.00108579	0.00131644	-0.00102605	-0.00172497	-0.000886026	-0.00184384	-0.000374631	0.00224785	-9.85922e-05	0.0011239	0.0023659	0.000932008	-0.00164466	-0.000737763	-0.00169168	-0.00127138	0.000846592		0.283854	6.10579e-05	2.76793e-05	2.59997e-05	-1.44702e-06	1.39046e-05	-1.44621e-05	-2.17847e-05	-0.000182853	-0.00022049	-0.000650486	-0.000177538	0.0214572	0.0531745	-0.00691987	5.07097e-05	2.24334e-05	5.16005e-05	1.37214e-05	2.98258e-05	8.18298e-05			15.8589	-6.81892	-2.49413	-8.70986
	0.294094	0.00151238	0.0020568	9.44742e-05	-0.00143297	0.000123481	-0.00147305	-0.00100359	-0.00140545	-0.00137428	-0.00125777	0.00145586	-0.00110009	0.0018899	0.00187397	-0.000349927	-0.00126994	-0.00137138	-0.0010884	1.62182e-05	0.00170651		0.294094	5.58409e-05	3.20406e-05	5.7502e-05	1.87245e-05	-5.56272e-06	1.63579e-05	-3.15203e-05	-0.000151526	-0.000541685	-0.00164937	-0.00221188	-0.0205084	-0.172145	-0.000167891	5.94854e-05	4.38933e-05	6.92171e-05	3.16809e-05	2.01629e-05	9.07594e-05			15.8897	-6.28962	-1.99197	-8.74259
	0.304334	0.00175568	0.00156475	-0.000840467	-0.00101409	-0.000840569	-0.00113354	6.74107e-05	-0.00113862	-0.000336633	-0.00135127	0.000334754	-0.00136665	0.00184168	0.00074907	-0.0011493	-0.000345285	-0.00123474	-1.83553e-05	0.00110666	0.00178309		0.304334	6.37165e-05	4.75089e-05	0.000112616	5.61293e-05	1.66657e-05	4.88698e-05	-8.21343e-06	-3.76415e-05	-0.000549092	-0.00172892	-0.00395656	-0.025812	-0.405297	0.0115685	9.32898e-05	8.69996e-05	6.79343e-05	5.20256e-05	3.19006e-05	4.87473e-05			15.9204	-6.03386	-1.86023	-8.84043
	0.314574	0.00135648	0.000654089	-0.0011537	-0.000126322	-0.00119739	-0.000286712	0.00094247	-0.000357325	0.000705095	-0.000717025	-0.000595742	-0.000890485	0.00110523	-0.000335002	-0.00120809	0.000579613	-0.000481964	0.000921726	0.00158515	0.00122574		0.314574	7.55584e-05	6.36913e-05	0.000122627	5.64485e-05	4.86375e-05	7.24249e-05	5.3692e-05	0.000119607	-0.00032538	-0.001037	-0.00477801	-0.00542482	-0.3428	-0.000750232	6.53947e-05	8.24897e-05	4.88431e-05	6.18594e-05	4.67281e-05	7.46842e-06			15.9511	-5.62451	-2.03172	-9.18046
	0.324814	0.000626082	-0.000285874	-0.000804264	0.000716332	-0.00089673	0.000576873	0.00135171	0.000468894	0.00130681	0.0002033	-0.00104865	-5.79529e-05	0.000141058	-0.000936291	-0.00059914	0.00113893	0.000404173	0.00134885	0.00140978	0.000403618		0.324814	5.31777e-05	6.66799e-05	7.5464e-05	3.35739e-05	6.09904e-05	8.85372e-05	0.000124449	0.000234445	1.55358e-05	-4.60884e-05	-0.00283743	-0.00156972	-0.0653343	-0.0182749	0.000866881	4.06285e-05	3.20826e-05	6.5267e-05	6.38829e-05	1.84371e-05			15.9818	-5.53962	-1.76557	-9.12649
	0.335054	-0.000137534	-0.000851813	-5.26752e-05	0.00116958	-0.000166254	0.0010833	0.00126829	0.0010278	0.00134278	0.000902021	-0.000902655	0.000677222	-0.000592058	-0.000958573	0.000239372	0.00124302	0.000992995	0.00120139	0.000826434	-0.000368705		0.335054	9.3264e-06	5.91898e-05	2.85553e-05	3.65067e-05	6.0271e-05	9.07003e-05	0.000153405	0.000236616	0.000319179	0.000778209	-8.63868e-05	-0.00658318	0.0869465	0.00299482	4.35145e-05	3.68741e-05	3.52789e-05	6.00897e-05	8.53867e-05	5.97149e-05			16.0125	-5.24765	-1.92827	-8.65135
	0.345294	-0.000639313	-0.000865818	0.00063281	0.00115712	0.000563145	0.001129	0.000797675	0.00117508	0.000911549	0.00114602	-0.000299501	0.00105567	-0.000820265	-0.000556828	0.000901188	0.000993393	0.00113583	0.00071162	0.000159994	-0.000795353		0.345294	4.42429e-06	5.59084e-05	2.64507e-05	5.90547e-05	6.08199e-05	7.2383e-05	0.000121994	0.000140742	0.000462617	0.00115511	0.00209808	0.00144983	0.0253032	0.0286021	-0.00197434	7.79517e-05	5.48608e-05	5.42456e-05	9.04486e-05	6.79895e-05			16.0433	-5.10187	-1.57182	-8.55494
	0.355534	-0.000705935	-0.000408828	0.000978006	0.000775747	0.000988318	0.00080175	0.000187411	0.00091818	0.000277168	0.000987239	0.00039952	0.00105471	-0.000557576	5.35032e-05	0.00116188	0.00049801	0.000920991	0.000180923	-0.000385357	-0.000712774		0.355534	4.29846e-05	6.51534e-05	5.08403e-05	5.03989e-05	6.1521e-05	4.396e-05	6.16877e-05	3.70298e-05	0.000417024	0.00100483	0.00301604	0.0118961	-0.0375765	-0.00740358	0.000285811	8.99377e-05	6.94793e-05	6.41301e-05	6.28011e-05	2.96521e-05			16.074	-4.85292	-1.90761	-8.33994
	0.365774	-0.000341668	0.00022318	0.00097159	0.000245406	0.00102442	0.000318242	-0.000332969	0.000425355	-0.000295525	0.000618755	0.000869243	0.000777652	-5.22566e-05	0.000666771	0.00104254	-4.61591e-05	0.000523406	-0.000239751	-0.000630748	-0.000242994		0.365774	6.17062e-05	8.19671e-05	6.18482e-05	7.01718e-06	6.09874e-05	2.95178e-05	1.55618e-05	2.06674e-07	0.000244808	0.000507393	0.0025767	0.00990721	0.0105295	-0.0456644	0.00413719	4.95052e-05	6.48477e-05	7.41787e-05	2.2373e-05	-6.64663e-08			16.1047	-4.47258	-2.1574	-8.17147
	0.376014	0.000198247	0.000722391	0.000712789	-0.000218132	0.000733116	-0.00012704	-0.00055041	-9.10961e-05	-0.000554092	0.000171109	0.000966063	0.000314087	0.000461757	0.0010055	0.00065963	-0.000387537	5.98247e-05	-0.000452343	-0.000480701	0.000327302		0.376014	4.06172e-05	9.537e-05	5.03308e-05	-1.25683e-05	6.32193e-05	3.9979e-05	-2.19127e-07	6.51399e-06	5.07292e-05	-5.54599e-05	0.00125013	0.00268919	0.0571713	0.017167	-0.000681603	2.2263e-05	5.34291e-05	5.37885e-05	6.61321e-07	1.99193e-05			16.1354	-4.37362	-1.70893	-7.64168
	0.386254	0.000601251	0.000937167	0.00031983	-0.000399359	0.000281507	-0.000356081	-0.000395623	-0.000388902	-0.000398161	-0.000221311	0.000759767	-0.000153001	0.000794375	0.000928134	0.000150594	-0.000377672	-0.000290646	-0.00037332	-2.61245e-06	0.000699662		0.386254	3.21487e-05	9.68584e-05	3.24203e-05	2.36847e-05	6.28266e-05	5.83997e-05	-2.09647e-06	8.6377e-07	-9.708e-05	-0.00043806	-0.000304957	-0.000675353	0.0272144	0.080329	-0.0070313	4.65634e-05	5.78139e-05	2.41723e-05	1.24115e-06	5.76092e-05			16.1661	-3.96217	-1.64604	-7.93477
	0.396494	0.000747899	0.000845145	-8.23786e-05	-0.00024235	-0.000143951	-0.000283961	9.46897e-06	-0.000358135	1.15081e-05	-0.000389543	0.000382418	-0.000402076	0.000854703	0.000538696	-0.000254195	-6.93689e-05	-0.000363249	7.56262e-06	0.000519364	0.000787798		0.396494	5.43618e-05	8.72173e-05	1.58532e-05	6.85149e-05	4.98416e-05	5.90994e-05	7.77366e-07	-9.11141e-07	-0.000154623	-0.000540804	-0.00142119	-0.00248144	-0.00905674	-0.0634863	0.00210149	0.000241266	7.20702e-05	4.17078e-05	3.60748e-06	6.13554e-05			16.1969	-3.66158	-1.61326	-7.72776
	0.406734	0.000688638	0.000530591	-0.000273475	9.33379e-05	-0.000334553	6.06358e-06	0.000423128	-6.64934e-05	0.000415254	-0.000251929	-9.01657e-06	-0.000323593	0.000647829	9.78012e-05	-0.000366534	0.000309717	-0.000150828	0.000473593	0.000774681	0.000664482		0.406734	5.64539e-05	7.20851e-05	6.39863e-07	6.38938e-05	3.23215e-05	3.74591e-05	2.36527e-05	5.98526e-05	-0.000115788	-0.000393461	-0.00173418	-0.00466406	-0.00255441	-0.33895	0.0116225	0.000248494	6.56924e-05	9.97016e-05	-2.45309e-06	3.40221e-05			16.2276	-3.45157	-1.3972	-6.86788
	0.416974	0.000493735	0.000132025	-0.000148402	0.00039671	-0.00022287	0.000329525	0.000621504	0.000304333	0.000624832	9.64874e-05	-0.000245566	-9.65173e-06	0.000277319	-0.000171918	-0.000156907	0.000571938	0.000193709	0.000711978	0.000711795	0.000409068		0.416974	1.91386e-05	5.08918e-05	4.70621e-07	2.85775e-05	3.25514e-05	1.2436e-05	6.6946e-05	0.000158444	-2.16688e-05	-6.93272e-05	-0.00122333	-0.00428666	0.0048728	-0.410136	-0.00432442	-2.69527e-05	3.71355e-05	0.000121261	-5.66999e-06	1.03136e-05			16.2583	-3.04242	-1.23964	-6.4345
	0.427214	0.000193474	-0.000159508	0.000149008	0.000546749	5.69904e-05	0.000505763	0.000593215	0.000554362	0.00063314	0.000415344	-0.000233502	0.000306254	-4.51779e-05	-0.000210312	0.00018853	0.000650734	0.000463725	0.000643381	0.000493192	0.000110795		0.427214	-5.82693e-06	1.85772e-05	3.0153e-05	2.95359e-05	5.75242e-05	7.38586e-07	8.67479e-05	0.000182651	8.54963e-05	0.000289705	-0.000255363	-0.00193615	-0.0107005	-0.18089	-0.0179141	4.1515e-05	2.83586e-05	7.20478e-05	5.77891e-06	3.26386e-07			16.289	-2.81082	-1.61275	-6.05352
	0.437454	-8.41051e-05	-0.000196221	0.00039381	0.000562988	0.000324033	0.000512996	0.000460413	0.000608914	0.000514039	0.000549712	-9.27204e-06	0.000477399	-0.00017426	-5.88929e-05	0.000439434	0.000577095	0.000569858	0.000440248	0.00027137	-0.000122949		0.437454	1.34205e-05	-1.39315e-05	6.53338e-05	7.33793e-05	8.64682e-05	-7.00049e-07	5.21778e-05	0.000102724	0.000173659	0.00052709	0.000656861	0.000695421	-0.018418	0.0511537	0.00870329	-0.000157123	6.00347e-05	1.31392e-05	2.39097e-05	2.1828e-06			16.3197	-2.35667	-1.14285	-6.03343
	0.447694	-0.000152611	-4.72547e-06	0.00048963	0.000486925	0.000481367	0.000441026	0.000296805	0.000506741	0.00033124	0.000518303	0.000259921	0.000497665	-9.49444e-05	0.000170849	0.000525049	0.000418632	0.000527878	0.000266863	7.34929e-05	-0.000154474		0.447694	4.41912e-05	-1.56934e-05	6.02193e-05	9.17382e-05	9.26686e-05	-3.19799e-07	1.40992e-05	2.75167e-05	0.000210012	0.000536357	0.00112037	0.00254121	-0.00578783	0.0564315	0.0276699	-0.000118652	9.10915e-05	1.01164e-05	3.23959e-05	2.97809e-05			16.3505	-2.13289	-1.16247	-5.81733
	0.457934	1.04612e-05	0.000261244	0.000495108	0.000337	0.00053594	0.000339392	0.00010818	0.000340909	0.000166608	0.000405651	0.000428779	0.000422588	0.000102648	0.000368181	0.000507623	0.000227399	0.000395466	0.000122604	-7.10679e-05	3.10023e-05		0.457934	5.78832e-05	2.71008e-05	1.86346e-05	4.831e-05	6.86582e-05	6.20645e-06	4.37436e-05	3.39912e-05	0.00016296	0.000333935	0.00102324	0.00296146	0.00499318	-0.031439	-0.0162914	0.000785647	7.64725e-05	4.68745e-05	3.10641e-05	7.45541e-05			16.3812	-2.3319	-1.29076	-5.61929
	0.468174	0.000244968	0.000447756	0.000451814	0.000174638	0.00049058	0.000200739	-4.75223e-05	0.000198054	7.77642e-05	0.000258891	0.000469495	0.000297679	0.000310033	0.000473632	0.000442562	8.07609e-05	0.00024971	-1.77187e-06	-6.49252e-05	0.000280719		0.468174	6.53487e-05	8.00962e-05	5.7337e-07	-1.71146e-06	3.14269e-05	2.76212e-05	0.000110344	6.27655e-05	6.11468e-05	6.46317e-05	0.000569286	0.00214504	0.00507021	-0.0192025	-0.0434909	0.000485253	3.23989e-05	6.60417e-05	3.12496e-05	9.17359e-05			16.4119	-2.38457	-1.50596	-5.87521
	0.478414	0.000395389	0.000507893	0.000352129	7.91268e-05	0.000345227	4.03179e-05	-3.63122e-05	0.000110461	8.79654e-05	8.9777e-05	0.000430215	0.000160507	0.000455444	0.000478412	0.000318527	4.50583e-05	0.000145348	-2.02834e-05	0.000105079	0.00044345		0.478414	6.73115e-05	9.08114e-05	3.17126e-05	8.3945e-07	4.69903e-06	5.37207e-05	0.000113576	4.70178e-05	8.39224e-07	-0.000130243	3.04717e-05	0.000648415	0.00480543	0.0468993	0.0323804	-0.00146515	3.38764e-06	5.20128e-05	3.23045e-05	7.08148e-05			16.4426	-2.09672	-1.28678	-5.8232
	0.488654	0.000450019	0.000464119	0.000228738	9.86013e-05	0.00017967	-3.14238e-05	0.000153839	9.44488e-05	0.000178033	-2.36779e-05	0.000350692	9.23176e-05	0.000486196	0.000401911	0.000161698	0.000127982	0.000122172	9.97137e-05	0.000312447	0.000488561		0.488654	4.42794e-05	5.04829e-05	6.31323e-05	3.3603e-05	1.42087e-07	6.16482e-05	4.10212e-05	3.12812e-05	2.15343e-05	-0.000188006	-0.00038036	-0.000757939	0.00617145	0.0452852	0.076092	-0.000562007	1.72819e-07	3.38416e-05	2.77772e-05	6.19593e-05			16.4733	-2.06342	-1.10216	-5.78147
	0.498894	0.000444914	0.000349816	0.000139857	0.000192998	9.59585e-05	6.05079e-05	0.000362894	0.000154913	0.000303327	1.19203e-05	0.000239285	0.000128904	0.000408577	0.000272938	7.16214e-05	0.000271257	0.000171614	0.000266411	0.000418671	0.000463734		0.498894	8.10715e-06	4.352e-06	5.19145e-05	4.26222e-05	1.34732e-05	4.68263e-05	-6.32603e-06	6.40349e-05	6.09394e-05	-0.000134162	-0.000558465	-0.00155803	0.0037508	0.00145685	-0.101356	0.00294493	4.53444e-05	3.07343e-05	2.68192e-05	8.48663e-05			16.5041	-1.93624	-0.957437	-5.47748
	0.509134	0.000373508	0.000220113	0.000125143	0.000287031	0.000126971	0.000241537	0.000443082	0.000272039	0.000406172	0.000179224	0.00014188	0.000208809	0.000291179	0.000154916	9.85043e-05	0.000386504	0.00024809	0.000374202	0.000417018	0.000383372		0.509134	-1.00913e-06	-5.13989e-06	2.80626e-05	2.84436e-05	3.17603e-05	3.07659e-05	2.72781e-05	9.41536e-05	6.33846e-05	-2.29382e-05	-0.000470424	-0.00155988	-0.000877091	-0.00646806	-0.369239	0.000886057	6.94749e-05	3.21324e-05	3.69508e-05	8.99444e-05			16.5348	-1.8565	-0.319273	-5.24633
	0.519374	0.000252354	0.000124841	0.000177377	0.000344477	0.000201244	0.000373078	0.000405411	0.000374529	0.000426395	0.000346545	0.000117432	0.000256738	0.000196478	0.000111606	0.00019862	0.000420358	0.00030958	0.000407002	0.000382131	0.000250906		0.519374	2.22729e-05	1.5266e-05	3.72923e-05	2.43022e-05	3.95572e-05	2.93108e-05	7.28882e-05	6.6584e-05	6.17837e-05	0.000107206	-0.000149146	-0.00087658	-0.00342282	0.00679052	-0.393888	-0.00474062	0.000891284	2.72907e-05	3.7856e-05	5.40548e-05			16.5655	-1.65033	-0.0794002	-4.85545
	0.529614	0.000151904	8.97642e-05	0.000263971	0.000368571	0.000247989	0.000396085	0.000340358	0.000392068	0.000368559	0.000398775	0.000161768	0.000274223	0.000147391	0.000149451	0.000309849	0.000373125	0.000336743	0.000386755	0.000334054	0.000139253		0.529614	4.06021e-05	3.02413e-05	6.72513e-05	3.20145e-05	2.84592e-05	3.04757e-05	5.76754e-05	2.09389e-05	9.63909e-05	0.000206401	0.000231426	7.14125e-05	-0.00397636	-0.00252081	-0.14414	-0.000826672	-0.000123388	2.65298e-05	1.42053e-05	2.97463e-05			16.5962	-1.43726	-0.0477537	-4.33646
	0.539854	0.000139709	0.000119672	0.000329082	0.00036317	0.000274771	0.000355262	0.00027881	0.000341434	0.000300652	0.000355423	0.000221608	0.000304813	0.000143993	0.000229483	0.000409678	0.000294812	0.000330951	0.000323847	0.000250029	0.000125474		0.539854	3.44181e-05	2.66229e-05	7.48993e-05	3.25472e-05	8.18947e-06	1.68797e-05	1.47852e-05	1.54733e-05	0.000122556	0.000227208	0.000469315	0.000858778	-0.00289205	-0.0182471	0.0588141	0.00725124	-0.00195658	4.13619e-05	-3.24922e-06	4.73602e-05			16.6269	-1.80035	0.0576931	-3.94243
	0.550094	0.000206384	0.000214112	0.00032923	0.000322329	0.000311555	0.000300438	0.000213289	0.000292447	0.000263078	0.000307783	0.000264223	0.000336013	0.000200404	0.000309039	0.000463937	0.000245506	0.000299168	0.000258155	0.000154611	0.000204265		0.550094	2.34277e-05	2.69965e-05	5.45111e-05	3.13152e-05	1.59419e-07	-8.84887e-07	1.35378e-05	3.79502e-05	8.73689e-05	0.000161418	0.00046855	0.00116474	-0.000886976	-0.012661	0.0363983	0.000638327	0.000709792	5.91769e-05	1.85384e-05	6.10898e-05			16.6577	-1.47504	0.42146	-3.51907
	0.560334	0.000289237	0.000342883	0.000290661	0.000266369	0.000333606	0.000236553	0.000165662	0.000265387	0.000241104	0.000283683	0.000296401	0.000322161	0.000300507	0.000364818	0.000425164	0.00021945	0.000260177	0.000233203	0.000134851	0.000295823		0.560334	2.75809e-05	5.19848e-05	3.48308e-05	4.54147e-05	1.29808e-05	4.11497e-06	4.529e-05	5.41456e-05	2.34616e-05	6.13752e-05	0.000291022	0.000958232	0.00113005	0.00104953	-0.0420283	-0.00874269	0.00394454	5.63576e-05	5.47782e-05	4.11011e-05			16.6884	-1.17805	0.398759	-3.12581
	0.570574	0.00034496	0.000423414	0.000272643	0.000241789	0.000289227	0.000176875	0.00016651	0.000227916	0.000216747	0.000246252	0.000308574	0.000270379	0.000381796	0.000375321	0.000319636	0.000183042	0.000242708	0.000241031	0.000221854	0.000343112		0.570574	4.33038e-05	8.71081e-05	3.04292e-05	6.66937e-05	3.53167e-05	3.50503e-05	4.72725e-05	6.53271e-05	-6.37984e-06	1.09346e-06	7.74841e-05	0.000447992	0.00229809	0.00462009	-0.0118258	1.62157e-05	-0.0016436	3.5654e-05	6.45027e-05	3.27621e-05			16.7191	-1.35166	0.176968	-2.54045
	0.580814	0.000365748	0.000400565	0.000279105	0.000258326	0.000197354	0.000156029	0.000204406	0.000186503	0.000216568	0.000183896	0.000276695	0.000215657	0.000394588	0.000336326	0.000233138	0.000159505	0.000244293	0.000249057	0.000322058	0.000347121		0.580814	5.9062e-05	9.68051e-05	3.07249e-05	7.1061e-05	5.37078e-05	6.14428e-05	8.86518e-06	7.04655e-05	2.80343e-06	-6.75743e-06	-8.35314e-05	-0.000111614	0.00230001	0.00399461	0.0507919	-0.0191185	-0.00677003	2.88562e-05	6.02425e-05	6.73631e-05			16.7498	-1.36835	0.559396	-2.05887
	0.591054	0.00035465	0.000316992	0.000264713	0.000279915	0.000147565	0.000192533	0.00023658	0.000194062	0.000249766	0.000152599	0.000222576	0.000180266	0.000347414	0.000285904	0.000209975	0.000218735	0.00024274	0.000265332	0.000335928	0.000327848		0.591054	6.67839e-05	6.75869e-05	3.17584e-05	5.39507e-05	6.20148e-05	5.88013e-05	-1.05757e-05	4.83191e-05	1.85643e-05	4.09711e-08	-0.000151515	-0.00049049	0.00139564	0.00601292	0.0392669	-0.132958	0.00362247	5.28987e-05	6.89834e-05	9.53981e-05			16.7805	-1.13238	1.35443	-2.0591
	0.601294	0.000312587	0.000254028	0.000225099	0.00027869	0.000176202	0.000249191	0.000250293	0.000247743	0.000278507	0.000178622	0.000194763	0.000177846	0.000281063	0.000258653	0.000225475	0.000340034	0.000236371	0.000313459	0.000284763	0.000296773		0.601294	6.2529e-05	2.37558e-05	4.61021e-05	3.45341e-05	5.12847e-05	3.92851e-05	2.7275e-05	9.81336e-06	3.47031e-05	4.72685e-06	-0.000122265	-0.000582196	0.000141216	0.00579541	-0.00125116	-0.277709	0.0110219	0.000362352	6.67693e-05	6.63124e-05			16.8113	-0.588663	1.85218	-2.04933
	0.611534	0.000259509	0.000243291	0.000218167	0.000275179	0.000226592	0.000277461	0.000265599	0.000288375	0.000279154	0.000215018	0.000209411	0.000224178	0.000227957	0.000247508	0.000258147	0.00039632	0.000251689	0.000361736	0.000257263	0.000262781		0.611534	5.41577e-05	4.9735e-07	7.10423e-05	3.241e-05	1.99175e-05	3.01309e-05	8.0972e-05	3.76169e-06	5.44282e-05	3.32577e-05	-1.9857e-05	-0.00037628	-0.000899634	0.00147966	-0.00237836	-0.284216	-0.00672436	0.000232331	2.92255e-05	1.44939e-05			16.842	-0.662098	1.6975	-1.91845
	0.621774	0.000242935	0.00025708	0.000268912	0.000292451	0.000242539	0.00027648	0.00028666	0.000298859	0.000274069	0.000227477	0.000233856	0.000287352	0.000207652	0.000233686	0.000310647	0.000328546	0.000288034	0.000357766	0.00027203	0.000242241		0.621774	5.98049e-05	7.84104e-06	7.48692e-05	4.92463e-05	-4.5223e-06	3.29885e-05	9.20618e-05	4.16385e-05	6.04091e-05	8.99309e-05	0.000111698	1.17332e-05	-0.0013721	-0.00211835	0.00880882	-0.115937	-0.0167563	-0.000226481	-1.78641e-07	7.77507e-06			16.8727	-0.651614	1.68452	-1.67102
	0.632014	0.000273413	0.000273909	0.000329539	0.000309764	0.000248468	0.00027439	0.000284925	0.000316169	0.000277434	0.000247537	0.000243631	0.000302608	0.000222079	0.000237689	0.000358766	0.000234001	0.000307297	0.000312536	0.000272991	0.000251696		0.632014	8.03581e-05	2.9544e-05	4.51467e-05	6.82976e-05	9.72859e-06	2.74685e-05	6.8338e-05	7.05387e-05	4.38054e-05	0.000123335	0.000208283	0.000370545	-0.00114525	-0.00378563	-0.00456808	0.0523193	0.0122598	-7.13848e-05	2.2888e-05	5.07746e-05			16.9034	-0.786971	1.99454	-1.44798
	0.642254	0.000304676	0.00028311	0.000345592	0.00029424	0.000282244	0.000266566	0.000246317	0.000338076	0.000269695	0.000290074	0.000251028	0.000266534	0.000241173	0.000281852	0.000366301	0.000216084	0.000291476	0.000277968	0.000247216	0.00028573		0.642254	9.19407e-05	4.77902e-05	2.36378e-05	6.94592e-05	4.75441e-05	8.85889e-06	5.67119e-05	4.97952e-05	2.69833e-05	0.000101047	0.00022472	0.000529791	-0.000442745	-0.00359196	-0.0189196	0.0717236	0.0253419	0.000266244	5.93328e-05	8.83448e-05			16.9341	-0.919056	1.83284	-1.40711
	0.652494	0.000296352	0.000274728	0.000318647	0.000255644	0.000311895	0.00022901	0.00021401	0.000316536	0.000248884	0.000302767	0.000272921	0.000240909	0.000243831	0.000331023	0.000342182	0.000250159	0.000265118	0.000274166	0.000233015	0.000315868		0.652494	8.04267e-05	6.12192e-05	4.89438e-05	5.06343e-05	6.23417e-05	-3.76312e-07	6.16632e-05	1.14634e-05	2.76519e-05	5.45123e-05	0.000158939	0.000450103	0.000331008	-0.00203197	-0.0113047	0.00281005	-0.0218067	9.73744e-05	5.37907e-05	8.65599e-05			16.9649	-1.19652	1.73883	-1.60511
	0.662734	0.000274617	0.000261622	0.00028497	0.000238267	0.000282251	0.000185553	0.000230175	0.000260535	0.000246755	0.000255223	0.000299049	0.000244783	0.000255028	0.000336161	0.000321422	0.000257645	0.000249488	0.000276335	0.000243177	0.000315059		0.662734	6.11886e-05	7.70875e-05	8.77221e-05	3.24527e-05	4.39417e-05	1.50386e-05	5.23193e-05	1.44763e-05	2.97301e-05	1.98081e-05	6.14507e-05	0.000239883	0.000826	9.56463e-05	0.00112622	-0.0250165	-0.0390628	-8.80741e-05	3.12669e-05	6.67431e-05			16.9956	-0.84515	1.93109	-1.34974
	0.672975	0.00028107	0.000275921	0.000266895	0.000256691	0.000213561	0.000193442	0.00026867	0.000236987	0.000266161	0.000207993	0.00030533	0.000240073	0.000300039	0.000308608	0.00030903	0.000240819	0.000240255	0.000274589	0.00024923	0.000295052		0.672975	4.71652e-05	9.23255e-05	8.12014e-05	3.48525e-05	2.20645e-05	3.73736e-05	3.28537e-05	6.06966e-05	1.39069e-05	-4.38186e-06	4.60665e-07	3.47215e-05	0.000908079	0.00181572	0.00350077	-0.00553077	0.0409824	2.68619e-05	4.0693e-05	6.06091e-05			17.0263	-0.319645	1.71765	-1.34908
	0.683215	0.000306252	0.000307371	0.000268836	0.000275003	0.000191211	0.000247653	0.000274496	0.000262978	0.000275786	0.000216034	0.000280499	0.000229092	0.000338116	0.000287206	0.000281982	0.0002493	0.000237364	0.00028244	0.000244221	0.000294287		0.683215	2.94784e-05	8.93255e-05	4.12309e-05	5.35482e-05	7.86903e-06	3.92101e-05	3.56532e-05	9.29413e-05	-7.6355e-06	-1.62188e-05	-1.02563e-05	-9.17299e-05	0.000652049	0.00246027	0.00368904	-0.00428775	0.062593	-2.54575e-05	6.10843e-05	6.37854e-05			17.057	-0.550168	1.68693	-1.37481
	0.693455	0.000314434	0.000302107	0.000285891	0.000268158	0.000250688	0.000283439	0.000249067	0.000286311	0.00027162	0.00025218	0.000242972	0.00026185	0.000314111	0.000275744	0.000247845	0.000284988	0.000256127	0.000304702	0.000250652	0.000321823		0.693455	6.77376e-06	5.7457e-05	2.93538e-05	6.77351e-05	-7.73822e-06	2.44149e-05	5.75321e-05	7.45407e-05	-9.40014e-06	1.08016e-05	4.61605e-07	-0.000122959	0.000199933	0.00202886	0.00634666	-0.0229681	-0.137559	-5.24907e-06	4.96898e-05	5.27611e-05			17.0877	-0.578906	1.71024	-1.40309
	0.703695	0.000303689	0.00024742	0.000302887	0.000265851	0.000323547	0.000278344	0.000235322	0.000279151	0.00028208	0.000269499	0.000216774	0.000321134	0.000257721	0.000257166	0.000241309	0.000306282	0.00029124	0.000327259	0.000275183	0.000339847		0.703695	6.04021e-07	1.5471e-05	5.36976e-05	6.5661e-05	-9.72678e-06	2.23752e-05	6.66548e-05	3.71157e-05	1.03245e-05	6.64219e-05	2.00561e-05	-6.82027e-05	-0.000238575	0.000887554	0.00582962	-0.0205018	-0.386023	0.000378916	3.62923e-05	3.31109e-05			17.1185	-0.49705	1.86728	-1.46932
	0.713935	0.000288858	0.000212775	0.000301385	0.000299022	0.000325816	0.000277569	0.000242708	0.000268357	0.00030267	0.000277981	0.000214138	0.0003301	0.000242222	0.000244258	0.000270554	0.000302244	0.00031311	0.000335594	0.000296818	0.000318052		0.713935	1.71354e-05	4.92575e-07	6.30849e-05	5.15995e-05	1.70127e-05	3.87278e-05	6.17759e-05	3.13191e-05	2.81192e-05	9.46569e-05	6.61154e-05	5.60034e-05	-0.000472347	-0.000335885	0.00144614	0.000432567	-0.3617	3.83997e-05	0.000380623	3.82531e-05			17.1492	-0.442575	1.66248	-1.27469
	0.724175	0.000271688	0.000248865	0.000281328	0.000334362	0.000266526	0.000298927	0.000246265	0.000272578	0.000298883	0.000297253	0.000227417	0.000288088	0.000267723	0.000245741	0.000294848	0.000299292	0.000309762	0.000315986	0.000305359	0.000282283		0.724175	3.16996e-05	2.63205e-05	3.9154e-05	3.50621e-05	3.5906e-05	4.14979e-05	6.25631e-05	5.56559e-05	2.94519e-05	7.69372e-05	0.000128915	0.000193229	-0.0004188	-0.00117533	-0.00195053	0.00979315	-0.0895814	-0.000593168	7.28358e-05	7.65028e-05			17.1799	-0.810804	1.32392	-1.13037
	0.734415	0.000250946	0.000316163	0.000264382	0.000316275	0.000229624	0.000300309	0.000244117	0.000277531	0.000277709	0.00030296	0.000246543	0.000278319	0.00027317	0.000244022	0.000277294	0.00030945	0.000300511	0.000270924	0.000306074	0.000270536		0.734415	3.10871e-05	6.85365e-05	1.96213e-05	2.51594e-05	1.23577e-05	1.48688e-05	6.23441e-05	6.39925e-05	2.73281e-05	5.73381e-05	0.000152236	0.000264938	-0.00014615	-0.00134429	-0.0036588	0.00678952	0.0932233	0.000141583	-9.03822e-05	0.000110006			17.2106	-0.147036	1.23278	-1.03625
	0.744655	0.000244788	0.000345285	0.000269786	0.000258483	0.000256987	0.000262868	0.000246139	0.000275684	0.000280402	0.000271006	0.000264178	0.00031944	0.000249608	0.000241987	0.000234019	0.00031274	0.000302366	0.000234728	0.000304675	0.000274835		0.744655	3.14281e-05	9.3558e-05	2.68828e-05	2.80402e-05	-7.61915e-06	-4.91536e-06	4.57161e-05	3.78278e-05	3.87465e-05	6.112e-05	0.000110987	0.000231968	0.00016358	-0.000861724	-0.00354533	0.00706659	0.0482946	0.000425578	0.000116957	0.000102461			17.2413	-0.600593	1.3199	-1.12015
	0.754895	0.000260354	0.000330169	0.000290157	0.000224577	0.000296854	0.000229476	0.00024469	0.000267674	0.00030281	0.000231135	0.000275924	0.00033578	0.000244183	0.000278425	0.000213635	0.000295933	0.00030838	0.000248419	0.000293703	0.000269672		0.754895	3.64595e-05	8.79523e-05	3.699e-05	3.64283e-05	3.25456e-05	1.72266e-05	3.08062e-05	1.39357e-05	5.66996e-05	5.51081e-05	5.2777e-05	0.0001279	0.000374628	-6.90344e-05	-0.00206318	0.00860611	-0.0295424	0.000162655	0.000147563	6.39294e-05			17.2721	-0.688462	1.12157	-1.24993
	0.765135	0.000277233	0.000309997	0.0003042	0.00023758	0.000287465	0.000235027	0.000234914	0.000248391	0.00029204	0.000228117	0.000277584	0.000295815	0.000267625	0.000343289	0.000225772	0.000277005	0.000307438	0.000291181	0.00027029	0.000269531		0.765135	2.60957e-05	5.73708e-05	3.20894e-05	3.34663e-05	8.70784e-05	5.44618e-05	4.08066e-05	2.60149e-05	6.33558e-05	1.94994e-05	2.94366e-05	2.9432e-05	0.00043707	0.000638166	-5.05371e-06	0.00324372	0.00435589	0.00385747	2.62522e-05	3.35943e-05			17.3028	-0.66905	1.0347	-1.30253
	0.775375	0.000277329	0.000304619	0.000304013	0.000262512	0.000245567	0.000254541	0.000243559	0.000227168	0.000235153	0.000258533	0.000273568	0.000259785	0.00028821	0.000364567	0.000244547	0.000276388	0.000297739	0.000303625	0.000246713	0.000299001		0.775375	3.28565e-06	2.21378e-05	3.22698e-05	2.1505e-05	7.36229e-05	5.8105e-05	6.09463e-05	4.83759e-05	6.1178e-05	-6.73011e-06	3.0741e-05	-2.14457e-05	0.000357826	0.000963189	0.001654	-0.0041904	0.0559552	-0.00390379	0.000136939	3.45263e-05			17.3335	-0.376726	1.11233	-1.38245
	0.785615	0.000275176	0.000304857	0.000304234	0.000273781	0.000236789	0.000250739	0.000280268	0.000239449	0.000188226	0.000277998	0.00027188	0.000266572	0.000301589	0.00031702	0.000264673	0.000279553	0.000280805	0.000279715	0.000246741	0.000332983		0.785615	4.49528e-06	1.37603e-05	5.6085e-05	2.65282e-05	1.28613e-05	3.55402e-05	6.5464e-05	3.5001e-05	6.34425e-05	1.11959e-05	1.85236e-05	-3.26884e-05	0.000172618	0.000866354	0.0023163	-0.0064441	0.0316337	-0.0673924	-9.65026e-05	5.63987e-05			17.3642	-1.42166	1.01711	-1.5754
	0.795855	0.000290304	0.000305189	0.00031067	0.000276117	0.000274803	0.000232917	0.000305247	0.000285314	0.000199832	0.000265025	0.000275742	0.000281523	0.000316536	0.00027023	0.000309029	0.000263957	0.000258398	0.00027847	0.00027669	0.000323946		0.795855	3.94662e-05	4.23802e-05	7.95863e-05	5.26681e-05	-1.37994e-05	3.31568e-05	6.12303e-05	-1.55497e-06	6.40635e-05	4.50597e-05	-6.09122e-06	-2.19384e-05	-4.7335e-05	0.00047623	0.00196464	-0.00487214	-0.0102204	-0.192314	-0.00045578	7.28209e-05			17.3949	-1.14061	0.852122	-1.46286
	0.806095	0.000309576	0.000306119	0.000307212	0.000275217	0.000304974	0.000236775	0.000282639	0.00030625	0.000247206	0.000245363	0.00027727	0.000277514	0.000310445	0.000269255	0.000350729	0.000244738	0.000244033	0.00031613	0.000312596	0.000281503		0.806095	6.60224e-05	6.80984e-05	6.57178e-05	6.31645e-05	-2.11279e-06	5.58035e-05	6.38321e-05	-2.28362e-06	4.95864e-05	4.4791e-05	-1.3608e-05	1.1653e-05	-0.000177283	-4.8848e-06	0.000909275	-0.00286779	-0.00825476	-0.284194	0.000393672	6.47713e-05			17.4257	-1.26925	0.94462	-1.73233
	0.816335	0.000298609	0.000302525	0.000279778	0.000269913	0.000286624	0.000263339	0.000241783	0.000264944	0.000274481	0.000249787	0.000272624	0.000272351	0.000269749	0.000272931	0.000329152	0.000251452	0.000256164	0.000335386	0.000320676	0.00025737		0.816335	5.11768e-05	4.86339e-05	2.29863e-05	3.46718e-05	-1.66111e-06	6.13962e-05	6.02572e-05	4.01314e-05	3.22137e-05	1.17472e-05	1.10736e-05	6.84172e-05	-0.000148549	-0.000362673	-0.000287868	-8.35239e-05	0.00294779	-0.235098	0.00111273	0.000784899			17.4564	-1.18177	0.761574	-1.51669
	0.826575	0.000257969	0.000287219	0.000246048	0.000273341	0.000248829	0.000276642	0.000229869	0.000214419	0.000263133	0.000269198	0.00026962	0.000274715	0.000243549	0.000250344	0.000262124	0.00027181	0.000296068	0.000303355	0.000294475	0.000271369		0.826575	2.02421e-05	8.60307e-06	8.05761e-09	1.52291e-06	-3.09185e-06	3.71727e-05	3.2299e-05	6.15411e-05	3.5912e-05	-5.86106e-06	5.96004e-05	0.000116074	-1.82578e-05	-0.000479509	-0.00115558	0.00245286	-0.00904747	-0.0771684	-0.000651972	0.000315334			17.4871	-1.21697	0.517427	-1.40769
	0.836815	0.000234451	0.000265163	0.000232463	0.000292116	0.000236219	0.000259896	0.000246209	0.000222486	0.000245233	0.000276026	0.000279866	0.000271206	0.000269286	0.00024872	0.000248069	0.000268801	0.000334877	0.000266021	0.000257121	0.000294248		0.836815	1.72038e-05	3.76588e-06	1.41392e-05	5.26278e-06	2.82836e-05	2.47935e-05	-3.45199e-06	2.94876e-05	5.69938e-05	1.8108e-05	0.000105973	0.000117538	0.00010057	-0.00034281	-0.00135981	0.00348494	-0.017891	0.0390278	-0.00159945	-0.0015843			17.5178	-0.827429	0.21104	-1.71907
	0.847055	0.000260106	0.000248234	0.000243655	0.000305272	0.000243721	0.000243993	0.000253333	0.000275501	0.000250424	0.000272963	0.000298328	0.000271132	0.000304007	0.000298005	0.000305143	0.000247972	0.000339042	0.000263989	0.000244041	0.000304794		0.847055	4.30645e-05	2.66368e-05	3.04938e-05	2.9764e-05	6.01627e-05	5.25256e-05	-1.43316e-05	-8.38283e-08	6.96669e-05	5.41788e-05	0.00011341	7.55495e-05	0.000151342	-5.54602e-05	-0.000910597	0.00298596	-0.00596616	0.0355036	0.00117428	-0.000251909			17.5485	-0.719511	0.286354	-1.63282
	0.857295	0.000299421	0.000242632	0.000261422	0.000285636	0.000235726	0.000254602	0.000241664	0.000300736	0.000271481	0.000282838	0.000304977	0.000290188	0.000295992	0.000344517	0.000334724	0.000246647	0.000300964	0.000280377	0.00027418	0.000306977		0.857295	6.20641e-05	2.48599e-05	2.73247e-05	2.90053e-05	4.90972e-05	8.40256e-05	4.05856e-06	2.35736e-05	6.36089e-05	6.04228e-05	6.8982e-05	2.65303e-05	0.00016171	0.000230875	-0.000131031	0.00144165	0.00633025	-0.0161437	0.00180472	0.00340335			17.5793	-1.01388	0.0226299	-1.76215
	0.867535	0.000297246	0.000243586	0.000274852	0.00024432	0.000214837	0.000273071	0.00023441	0.000271734	0.000282247	0.000301819	0.000288251	0.00030608	0.000274916	0.000333168	0.000285583	0.00026845	0.000248878	0.000294634	0.000322506	0.000305405		0.867535	5.51244e-05	2.00681e-06	3.09378e-05	1.26352e-07	3.05852e-05	6.87427e-05	2.53739e-05	6.27859e-05	4.75182e-05	3.82447e-05	1.40205e-05	1.59627e-06	0.000153996	0.000390567	0.000571085	-0.000339233	0.00666398	-0.0294134	-0.000745615	0.000290368			17.61	-0.902917	-0.207898	-2.13119
	0.877775	0.000259274	0.00024351	0.000279922	0.000214989	0.000215088	0.000274158	0.000248401	0.000227179	0.000276159	0.000302205	0.000265164	0.000286417	0.000285539	0.000290837	0.000236901	0.000281988	0.000215757	0.000312586	0.000329231	0.000292658		0.877775	3.74209e-05	9.80279e-06	5.35082e-05	-1.76017e-05	4.77949e-05	2.02197e-05	3.03619e-05	5.82906e-05	3.19187e-05	2.22432e-05	-2.05672e-07	3.90257e-06	0.000109252	0.000373103	0.000900628	-0.00161824	0.00489006	-0.0137571	0.0016703	-0.00588638			17.6407	-0.600584	-0.557535	-2.14134
	0.888015	0.000236059	0.000242509	0.000273782	0.00021399	0.000243012	0.000273477	0.000268957	0.000214289	0.000261419	0.000281339	0.000264218	0.000249152	0.000305244	0.000271422	0.000250935	0.000277082	0.000213077	0.000318393	0.000278367	0.000274486		0.888015	2.43646e-05	4.82319e-05	6.06253e-05	1.5232e-06	6.16509e-05	-9.42339e-07	2.71795e-05	2.805e-05	3.09764e-05	2.74613e-05	2.04354e-05	2.56034e-05	2.98117e-05	0.000230568	0.000817864	-0.00197058	0.0054064	-0.0123187	-0.0102975	0.000231215			17.6714	-0.708456	-0.643466	-1.69701
	0.898255	0.000240832	0.000249075	0.000255949	0.000226955	0.000259693	0.000290305	0.000273394	0.000240488	0.000245295	0.000260558	0.000288045	0.000233538	0.000292434	0.00027831	0.000280878	0.000266127	0.000226969	0.00028593	0.000237949	0.000266109		0.898255	9.04404e-06	6.76701e-05	3.92586e-05	4.78257e-05	2.98991e-05	1.96913e-05	3.36599e-05	3.0591e-05	5.8233e-05	3.57314e-05	3.70755e-05	5.29077e-05	-2.45483e-05	5.40078e-05	0.000447971	-0.00135084	0.00316741	-0.0189474	-0.0871648	0.00984094			17.7021	-0.706758	-0.377948	-1.20108
	0.908495	0.000244413	0.000266838	0.000243627	0.000246338	0.000243922	0.000305114	0.000257363	0.000280012	0.000234715	0.000247028	0.000306127	0.000242405	0.000274479	0.000280468	0.000278841	0.00024912	0.000243974	0.000246442	0.000264453	0.000275523		0.908495	-1.12047e-05	6.21076e-05	3.16733e-05	9.54045e-05	-4.10069e-08	3.13763e-05	5.07849e-05	6.71104e-05	9.4508e-05	3.23946e-05	4.92139e-05	6.24028e-05	3.61021e-06	-8.05216e-05	8.96293e-06	-0.000232053	-0.001427	-0.00914947	-0.220197	-0.00112732			17.7329	-0.90283	-0.390471	-1.35102
	0.918735	0.000241688	0.000282971	0.000253465	0.000284438	0.000226032	0.000292243	0.00023981	0.000293781	0.000243554	0.000236338	0.000296456	0.000254692	0.000296581	0.000267436	0.000276524	0.000221227	0.000259984	0.000255951	0.000305497	0.000292582		0.918735	-1.12313e-05	6.49531e-05	5.42367e-05	0.000113787	2.44502e-05	9.19873e-06	6.40087e-05	8.27882e-05	9.28438e-05	2.67455e-05	8.26917e-05	3.99497e-05	7.25196e-05	-0.000136772	-0.000303276	0.000799337	-0.00379481	0.00801114	-0.291307	-0.0153904			17.7636	-1.12251	-0.22018	-1.673
	0.928975	0.00025375	0.000280417	0.000278318	0.000343805	0.000246271	0.000274821	0.000237758	0.000266348	0.000265848	0.000240668	0.000277234	0.000272607	0.000339052	0.000250595	0.00029632	0.000210913	0.000275085	0.00029593	0.000286809	0.00030609		0.928975	2.95349e-05	6.75948e-05	5.87772e-05	8.56114e-05	6.24177e-05	-4.43668e-07	6.45774e-05	5.24179e-05	4.27975e-05	2.94927e-05	0.000119366	2.66605e-06	9.01563e-05	-0.00010759	-0.000405282	0.0012972	-0.00405058	0.0126508	-0.203924	0.00334443			17.7943	-0.769605	-0.200369	-1.38671
	0.939215	0.000272678	0.000259942	0.000287694	0.000382404	0.000289139	0.000285044	0.000247764	0.000225542	0.00027457	0.000262366	0.000278596	0.000297833	0.000341637	0.000239785	0.000305222	0.000252268	0.000280462	0.00030191	0.00024581	0.000308738		0.939215	8.19683e-05	3.78987e-05	2.24324e-05	3.16721e-05	5.51736e-05	3.30252e-05	5.96367e-05	1.11954e-05	-2.96673e-07	3.38278e-05	0.000108271	-1.5271e-05	5.02579e-05	-1.84056e-06	-0.000307318	0.001186	-0.00261974	0.00832375	-0.0332213	0.024083			17.825	-1.16325	0.0437831	-1.4844
	0.949455	0.000267983	0.000244395	0.000269019	0.00035622	0.000304369	0.000305314	0.000250708	0.000214467	0.000257784	0.000274932	0.000298588	0.00030561	0.000297007	0.000239544	0.000298413	0.000328253	0.000273782	0.000278472	0.000261051	0.000304336		0.949455	9.0942e-05	2.41007e-06	-4.44848e-07	-3.82219e-06	2.90314e-05	6.13341e-05	5.90817e-05	1.04193e-06	1.46723e-05	3.14194e-05	5.07807e-05	-9.29917e-07	3.13871e-05	0.000132204	-8.4838e-05	0.000679792	-0.000394901	0.00606606	0.0573284	-0.00751548			17.8557	-1.53657	-0.0664212	-1.77614
	0.959695	0.0002474	0.000251557	0.000244642	0.000284315	0.000274806	0.000288962	0.000236499	0.000232725	0.000243941	0.000266887	0.000310824	0.000277711	0.000252806	0.000252115	0.000319781	0.000370173	0.000266833	0.000280689	0.000302227	0.000302434		0.959695	4.68359e-05	1.45041e-05	2.97751e-05	-6.70621e-06	3.74502e-05	3.73682e-05	6.28472e-05	1.87713e-05	6.41073e-05	2.6766e-05	8.93311e-06	2.29522e-05	5.59874e-05	0.000221808	0.000179549	3.64531e-05	0.0015596	0.00382283	0.026977	-0.0387516			17.8865	-1.3874	0.478795	-1.66993
	0.969935	0.000246857	0.000271274	0.000248543	0.000238934	0.000240448	0.000241161	0.000217021	0.000245734	0.000255377	0.000272343	0.000307209	0.000243928	0.000245466	0.000269946	0.000360941	0.000339387	0.000276895	0.000302924	0.000287654	0.000305282		0.969935	-3.37043e-08	5.53532e-05	6.73906e-05	2.02422e-06	6.40436e-05	-1.53552e-06	6.39753e-05	3.3139e-05	8.39e-05	2.9721e-05	2.0079e-05	3.06095e-05	5.67339e-05	0.000214728	0.000382922	-0.000468175	0.00249772	-0.00214714	-0.0234381	0.0170132			17.9172	-1.43121	0.657971	-1.65112
	0.980175	0.000269347	0.000273794	0.000282243	0.000251451	0.000235008	0.000217763	0.000217621	0.000242791	0.00027637	0.000300902	0.000302154	0.000236028	0.000262725	0.000274084	0.000351555	0.000274248	0.000297177	0.000295991	0.000246318	0.000295079		0.980175	-4.86527e-06	5.52618e-05	5.70447e-05	1.37475e-05	5.78723e-05	2.15036e-06	5.67411e-05	3.25489e-05	5.71349e-05	4.31297e-05	5.32522e-05	2.46742e-05	1.49059e-05	0.000124699	0.000425551	-0.000670243	0.0022581	-0.00691853	-0.0241855	0.072499			17.9479	-1.77163	0.323345	-2.05671
	0.990415	0.000282391	0.000250236	0.000310064	0.000280958	0.000245863	0.00024949	0.000250653	0.000247855	0.00028047	0.000306328	0.000304218	0.000244487	0.00027659	0.000254525	0.000278409	0.000244176	0.000304605	0.000274536	0.000266314	0.000267319		0.990415	1.91451e-05	9.04812e-06	2.07333e-05	3.87929e-05	2.42674e-05	3.36831e-05	4.01738e-05	3.04528e-05	2.79624e-05	6.04785e-05	6.37338e-05	3.17212e-05	3.22776e-06	2.52824e-05	0.000287287	-0.000524848	0.00121414	-0.00644837	-0.0089053	-0.0507354			17.9786	-1.74173	-0.0522313	-2.09832
	1.00066	0.000276406	0.000226634	0.000298069	0.000283543	0.00024658	0.000295418	0.000295611	0.000266306	0.000273649	0.00026859	0.000305989	0.00024458	0.000276947	0.000229596	0.000218339	0.000259088	0.000289487	0.00029145	0.000326204	0.000255063		1.00066	3.11991e-05	-1.37375e-05	1.4163e-05	6.25588e-05	1.30113e-05	4.27258e-05	2.32434e-05	3.12616e-05	3.36909e-05	6.84244e-05	4.783e-05	6.21472e-05	4.34376e-05	-2.22181e-05	5.41693e-05	-0.000138592	-9.74671e-05	-0.0031863	-0.0145835	-0.297827			18.0093	-1.57284	0.108053	-2.32717
	1.0109	0.000270566	0.000238278	0.000262748	0.000270756	0.000244533	0.000303229	0.000312576	0.00027622	0.000272862	0.000244148	0.000305147	0.000244688	0.000273843	0.000233957	0.000226355	0.000274783	0.000271565	0.000330562	0.000330447	0.000288065		1.0109	2.38268e-05	2.21088e-05	4.17046e-05	5.48874e-05	3.86309e-05	2.82402e-05	2.29056e-05	3.062e-05	5.67042e-05	6.1341e-05	3.17529e-05	9.44359e-05	5.89136e-05	-1.08374e-05	-0.000122046	0.000256331	-0.00109184	-0.000260125	-0.0203664	-0.391407			18.0401	-1.38867	0.141967	-2.4434
	1.02114	0.000274026	0.000285633	0.000255669	0.000269628	0.00025831	0.000280289	0.000286795	0.000273704	0.000273973	0.000262971	0.000305972	0.000258971	0.000273922	0.000272194	0.000271375	0.00027016	0.000269007	0.000327069	0.000283071	0.000331313		1.02114	2.74932e-05	6.67187e-05	6.26667e-05	3.07866e-05	6.30152e-05	2.33941e-05	4.34993e-05	4.29462e-05	5.92847e-05	5.37255e-05	3.56869e-05	0.000103916	1.87735e-05	2.47358e-05	-0.000153601	0.000484675	-0.00144168	0.00244708	-0.00603422	-0.235561			18.0708	-1.04592	-0.316442	-3.03495
	1.03138	0.00027489	0.000332451	0.000291071	0.000276842	0.000279986	0.000276896	0.000250998	0.000277485	0.00026059	0.000274238	0.000306077	0.000276453	0.000274306	0.000303747	0.000301593	0.00027607	0.000276419	0.00028336	0.000270063	0.000327833		1.03138	5.83558e-05	6.44084e-05	5.56624e-05	3.93043e-05	5.64087e-05	3.25919e-05	6.1853e-05	7.83077e-05	3.98474e-05	6.1831e-05	5.72976e-05	8.82862e-05	2.8231e-06	5.47117e-05	-7.17959e-05	0.000481857	-0.00110274	0.0037783	0.00998592	-0.0522552			18.1015	-0.787656	-0.539632	-3.46169
	1.04162	0.000274211	0.000339224	0.000315264	0.000276797	0.000284231	0.000299879	0.000245389	0.000281519	0.000239146	0.000248399	0.000294384	0.000278893	0.000272778	0.000291103	0.000302549	0.000300267	0.000277685	0.000260021	0.00030091	0.000288288		1.04162	9.01543e-05	3.30429e-05	3.72651e-05	7.8569e-05	3.62108e-05	3.53085e-05	4.95439e-05	0.000100285	3.08587e-05	7.20052e-05	7.3664e-05	5.73962e-05	5.61591e-05	7.59906e-05	4.0461e-05	0.000304376	-0.000339126	0.00336514	0.011224	-0.0274101			18.1322	-0.732295	-0.880272	-3.87295
	1.05186	0.000285083	0.000307741	0.000286553	0.000273329	0.000267371	0.000300312	0.000266883	0.00026033	0.000233031	0.000246483	0.000276207	0.000273699	0.000277778	0.000251876	0.000283139	0.000302979	0.000272918	0.000272186	0.000299363	0.000275056		1.05186	8.93357e-05	2.93453e-05	2.8382e-05	8.99213e-05	3.08858e-05	2.88872e-05	1.2107e-05	7.30274e-05	4.67754e-05	5.91567e-05	6.41122e-05	2.5163e-05	0.000101549	9.02053e-05	0.000130317	6.04184e-05	0.000443914	0.00175406	0.00720876	-0.073802			18.1629	-1.04443	-0.724417	-4.34476
	1.0621	0.000304368	0.000276094	0.000246222	0.000273827	0.000248108	0.000252022	0.000281337	0.000223708	0.000250995	0.000299862	0.000274986	0.00027304	0.000294182	0.000230305	0.000256134	0.000267962	0.000271782	0.000273868	0.000250596	0.000296841		1.0621	6.2788e-05	5.67553e-05	2.95331e-05	5.27203e-05	3.40562e-05	2.7036e-05	-9.29189e-06	3.42148e-05	6.51677e-05	3.389e-05	3.93161e-05	1.49329e-05	6.84898e-05	9.00399e-05	0.00019285	-0.000142797	0.000917281	-0.000212773	0.00649848	-0.051642			18.1937	-1.17482	-0.970222	-4.53621
	1.07234	0.000304387	0.000274457	0.000256206	0.000274327	0.00024552	0.00020313	0.000277086	0.00021226	0.000271654	0.000336179	0.000302559	0.000274692	0.000311179	0.000240348	0.000243085	0.000242536	0.000276379	0.000247863	0.000227427	0.000303061		1.07234	4.80519e-05	6.16539e-05	3.08623e-05	2.07798e-05	2.63715e-05	3.23179e-05	1.51177e-05	3.95696e-05	6.536e-05	3.24043e-05	3.03166e-05	3.84544e-05	7.52408e-06	6.75495e-05	0.000217246	-0.000216541	0.000932794	-0.00166104	0.00369638	0.0074209			18.2244	-1.26412	-0.890584	-4.94071
	1.08258	0.000275069	0.000284849	0.000296194	0.000273547	0.00026188	0.000210575	0.000271636	0.000233157	0.000271668	0.000295953	0.000326211	0.000273821	0.000312138	0.000260405	0.000254432	0.000256711	0.000278036	0.00022866	0.000269268	0.000281451		1.08258	6.10521e-05	2.51215e-05	3.02215e-05	3.94909e-05	2.15473e-05	3.39078e-05	6.53315e-05	6.23349e-05	6.10933e-05	5.42588e-05	3.79626e-05	6.42467e-05	5.59504e-06	3.08661e-05	0.000184781	-0.0001583	0.000589571	-0.00207373	-0.00301377	0.0183145			18.2551	-0.773559	-1.09375	-5.19466
	1.09282	0.000243481	0.000273977	0.000301301	0.000276293	0.000282163	0.000264059	0.000274216	0.000255464	0.000253804	0.000235851	0.000306466	0.000275311	0.000295583	0.000273781	0.000272385	0.000277176	0.0002696	0.00024206	0.000316979	0.000276815		1.09282	7.50537e-05	-1.91705e-08	3.18607e-05	8.28585e-05	4.25475e-05	2.82747e-05	9.26091e-05	4.74184e-05	7.56692e-05	5.96878e-05	3.12417e-05	5.47208e-05	5.82873e-05	2.44588e-06	0.000110116	-3.01401e-05	0.000101404	-0.00154454	-0.00705122	0.000879458			18.2858	-0.944387	-1.55396	-5.49769
	1.10306	0.000244797	0.000246735	0.000277338	0.000276934	0.000283824	0.000303957	0.000270156	0.000268644	0.000240413	0.000225881	0.00025792	0.000276968	0.0002777	0.000271509	0.00027536	0.000274669	0.000252214	0.00026625	0.000306913	0.000299018		1.10306	6.01809e-05	2.56321e-05	3.28915e-05	9.86409e-05	6.50447e-05	2.56878e-05	7.47715e-05	2.58591e-05	0.000101069	3.85426e-05	5.70539e-06	3.00715e-05	9.32773e-05	-7.2196e-06	3.68778e-05	0.000103841	-0.000302587	-0.000459623	-0.00587693	0.00763933			18.3165	-1.12256	-1.72471	-5.51789
	1.1133	0.00026897	0.000245511	0.000285486	0.00027034	0.00026237	0.000296882	0.000250011	0.000286983	0.000240997	0.000249469	0.000244447	0.000272194	0.000276674	0.000247262	0.000273629	0.000278504	0.000241031	0.000274702	0.000259314	0.000299788		1.1133	2.34861e-05	6.2945e-05	2.34045e-05	7.48422e-05	4.65509e-05	3.63738e-05	3.74388e-05	5.55032e-05	0.000104995	3.30244e-05	2.59967e-07	3.7697e-05	8.0828e-05	-1.24515e-06	1.8669e-06	0.000206763	-0.000474558	0.00061194	-0.00280069	0.0224654			18.3473	-1.39709	-1.82576	-5.64234
	1.12354	0.000273416	0.000279882	0.000325954	0.000270244	0.000243112	0.000261506	0.000224736	0.000303973	0.000245557	0.000264624	0.000287416	0.00026849	0.000295095	0.000214188	0.000286037	0.000311893	0.000256151	0.000270811	0.000244204	0.000261062		1.12354	-8.45225e-07	5.85395e-05	5.07716e-06	3.97415e-05	6.49069e-06	5.40272e-05	1.84648e-05	9.33135e-05	7.62878e-05	6.65446e-05	3.21124e-05	6.32265e-05	6.08548e-05	2.03186e-05	3.68312e-06	0.000244695	-0.000392339	0.00127174	-7.86319e-05	0.0131564			18.378	-1.58694	-1.88087	-6.03231
	1.13378	0.000240916	0.000305986	0.000333058	0.000282412	0.000254224	0.000235643	0.000213394	0.000298418	0.00024509	0.000279927	0.000337905	0.000281776	0.000315215	0.000212523	0.00030396	0.000341062	0.000296532	0.000274775	0.000275694	0.000232528		1.13378	7.01316e-06	2.7149e-05	-1.41751e-06	2.69365e-05	1.03534e-05	6.42208e-05	2.73321e-05	6.28956e-05	4.103e-05	9.55696e-05	6.21361e-05	4.96229e-05	7.07275e-05	5.93406e-05	2.63559e-05	0.000185137	-0.000122564	0.00131374	0.00257331	-0.00519628			18.4087	-2.11429	-1.85263	-6.35281
	1.14402	0.000211952	0.000283519	0.000289943	0.000281803	0.000290219	0.000236609	0.000221991	0.000279106	0.000243339	0.00030149	0.000348557	0.00030238	0.000313569	0.000255764	0.000300341	0.00032821	0.000330636	0.000282125	0.00030594	0.000255762		1.14402	3.42811e-05	1.65948e-05	1.96563e-05	4.90846e-05	6.75104e-05	6.38559e-05	4.6484e-05	5.61825e-06	2.69568e-05	6.97435e-05	5.34104e-05	6.72218e-06	9.09962e-05	9.45956e-05	6.77823e-05	6.46338e-05	0.000190816	0.000813026	0.00365657	-0.00939028			18.4394	-2.04247	-2.00907	-6.45504
	1.15426	0.000230526	0.000237057	0.000255323	0.000255082	0.000317681	0.000250648	0.000241714	0.000265767	0.000243785	0.000301242	0.000333795	0.00029893	0.000284282	0.000305272	0.000276669	0.000292148	0.000332048	0.000273523	0.000306441	0.000305535		1.15426	5.55268e-05	3.45527e-05	5.23218e-05	7.97292e-05	0.000108861	5.71131e-05	6.01221e-05	1.8327e-05	2.96063e-05	1.41559e-05	2.87016e-05	1.22579e-05	8.0631e-05	9.18419e-05	0.000118899	-2.26785e-05	0.000406917	0.000111647	0.00310186	-0.0064094			18.4701	-2.11693	-2.52456	-6.76936
	1.1645	0.000284037	0.000221631	0.000266952	0.000239999	0.00031407	0.000251406	0.000252898	0.000249953	0.000243719	0.000279265	0.000319348	0.000263494	0.000250575	0.000317906	0.000261608	0.000272864	0.000312507	0.000250981	0.00030581	0.000334097		1.1645	6.14428e-05	5.46115e-05	6.37629e-05	7.29939e-05	8.34771e-05	4.08807e-05	6.52623e-05	8.16865e-05	2.97209e-05	2.80587e-06	3.29491e-05	8.44443e-05	4.22863e-05	5.54997e-05	0.000139403	-2.46341e-05	0.00043906	-0.000465593	0.00150194	-0.00693747			18.5009	-2.27093	-3.20124	-6.87905
	1.17474	0.000314718	0.000253278	0.000289269	0.000267	0.000285281	0.000231953	0.000245383	0.000221896	0.000243401	0.000278546	0.000301577	0.000233775	0.000242302	0.000304453	0.000273828	0.000279345	0.000296374	0.000244809	0.000315652	0.00032928		1.17474	6.06203e-05	6.13892e-05	4.75347e-05	2.60279e-05	2.53208e-05	2.07941e-05	6.20311e-05	9.32708e-05	2.80497e-05	5.30714e-05	6.7097e-05	0.000142062	1.77001e-05	3.01172e-05	9.4563e-05	1.73869e-05	0.000292923	-0.000713172	-0.000365383	-0.00587136			18.5316	-2.64743	-3.74709	-6.90122
	1.18498	0.000298609	0.000292718	0.00028077	0.000301825	0.000252526	0.000214401	0.000232575	0.00021104	0.000245258	0.000301216	0.000278656	0.000250822	0.000265266	0.000298292	0.000296482	0.000296241	0.000282047	0.000262367	0.000299891	0.000310544		1.18498	6.16818e-05	5.08393e-05	3.16062e-05	-2.56267e-06	-1.71304e-06	2.1751e-05	4.7874e-05	4.07418e-05	3.84755e-05	9.61577e-05	9.19588e-05	0.00012118	2.55881e-05	3.18657e-05	2.21038e-05	3.4922e-05	7.23856e-05	-0.000620194	-0.00169586	0.000118142			18.5623	-2.6901	-3.76898	-7.18435
	1.19522	0.000272837	0.000305695	0.000252083	0.000298097	0.00023358	0.000219048	0.00024311	0.000238645	0.000245465	0.000297974	0.000276763	0.000303682	0.000295141	0.000305942	0.000305155	0.000310412	0.000258112	0.000274824	0.000245964	0.000292268		1.19522	6.25435e-05	2.18967e-05	3.30613e-05	2.97693e-05	1.2561e-05	4.43462e-05	3.10372e-05	7.50287e-06	5.65384e-05	7.66586e-05	9.02302e-05	5.93346e-05	3.94764e-05	2.93293e-05	1.23227e-07	2.67383e-05	-0.000103231	-0.000270279	-0.00205262	0.00509668			18.593	-2.55235	-3.99238	-6.77982
	1.20546	0.000279901	0.000302252	0.00024216	0.000276412	0.000238227	0.000237636	0.000278882	0.000272207	0.000240508	0.000260042	0.000298037	0.000337071	0.00030623	0.000308941	0.000292228	0.000311253	0.000242428	0.000261014	0.000211419	0.000277454		1.20546	6.06542e-05	-3.97201e-06	3.27667e-05	8.4501e-05	2.94132e-05	4.32631e-05	3.3281e-05	2.6504e-05	6.42566e-05	3.50066e-05	8.59951e-05	2.85568e-05	3.4057e-05	7.37914e-06	2.77727e-05	3.98098e-05	-0.000159679	0.000190056	-0.00148212	0.00579698			18.6237	-2.46443	-3.65931	-6.91417
	1.2157	0.000303698	0.000308133	0.000264575	0.000281722	0.000264711	0.000252535	0.000305248	0.000275366	0.000240712	0.000240327	0.000302153	0.000320568	0.000294509	0.000304372	0.000273789	0.000295449	0.000260415	0.000240948	0.000237555	0.000268435		1.2157	6.03387e-05	9.50027e-06	1.45471e-05	9.75207e-05	2.84941e-05	2.68389e-06	6.15596e-05	4.5661e-05	6.17227e-05	4.09988e-05	9.40408e-05	4.17355e-05	2.16419e-05	1.65916e-06	2.91959e-05	8.75864e-05	-0.000110344	0.000542494	-0.000368762	0.00449647			18.6545	-2.84992	-3.47189	-6.8172
	1.22594	0.000298772	0.00031417	0.000300885	0.000303434	0.00029849	0.000267616	0.00028742	0.000273426	0.000255308	0.000261136	0.00026792	0.000284355	0.00027709	0.000302308	0.000267352	0.000277825	0.00029792	0.000237268	0.000283143	0.000272262		1.22594	6.07939e-05	6.12719e-05	1.28291e-08	6.7116e-05	2.86193e-05	-1.21101e-05	8.23067e-05	3.2627e-05	6.23816e-05	8.18435e-05	8.70043e-05	6.01117e-05	2.71587e-05	3.35015e-05	-7.13662e-06	0.000123783	-2.23915e-05	0.00062328	0.000722916	0.00182312			18.6852	-2.54604	-3.38956	-6.87689
	1.23618	0.000262245	0.000294573	0.000320253	0.000298647	0.000316607	0.000290784	0.000241697	0.000301566	0.000272595	0.000282329	0.000240258	0.000264922	0.000269504	0.000305778	0.000275695	0.000274628	0.000309922	0.000246835	0.000288916	0.000287629		1.23618	4.84673e-05	0.00010108	1.11782e-05	3.77535e-05	3.80933e-05	4.71211e-05	5.8827e-05	1.77278e-05	6.31248e-05	8.68468e-05	4.76419e-05	5.49725e-05	4.78763e-05	6.44974e-05	5.69104e-06	0.000104672	5.69657e-05	0.000418902	0.00134835	-0.000911074			18.7159	-2.88623	-3.74461	-6.75964
	1.24642	0.000240597	0.000258254	0.000307713	0.000276203	0.000308891	0.000306011	0.000219547	0.000335025	0.000270284	0.000278145	0.000267143	0.000251723	0.000273721	0.000306719	0.00028088	0.000276925	0.000282767	0.000260225	0.000270059	0.00030362		1.24642	1.87154e-05	8.85842e-05	2.97087e-05	3.03952e-05	3.40488e-05	0.00011556	1.20572e-05	2.95892e-05	5.12029e-05	4.6385e-05	1.89605e-05	3.53497e-05	6.07938e-05	5.45213e-05	9.46324e-05	5.03993e-05	0.000113393	9.52936e-05	0.00129313	-0.00279388			18.7466	-3.15673	-3.86093	-6.70478
	1.25666	0.000257655	0.000240183	0.000272662	0.000278246	0.000287617	0.000290131	0.000248854	0.000322477	0.000249197	0.000275272	0.000322588	0.000224863	0.000277146	0.00030453	0.000272853	0.000265967	0.000248968	0.000281689	0.000279664	0.000308295		1.25666	-3.4747e-06	4.08188e-05	3.12593e-05	3.77303e-05	1.54352e-05	0.000110033	1.56611e-06	5.21326e-05	3.35329e-05	2.44385e-05	4.55661e-05	2.98544e-05	5.97937e-05	2.43952e-05	0.000156103	1.0776e-05	0.000143759	-0.000148245	0.00072295	-0.00305196			18.7773	-2.88061	-3.68075	-6.66037
	1.2669	0.000282777	0.000243225	0.000244759	0.000303797	0.000275175	0.000252646	0.000294379	0.000274617	0.000233496	0.00029503	0.000332372	0.000210218	0.000274811	0.000304257	0.000266386	0.000248061	0.000242369	0.000303311	0.000317487	0.000305436		1.2669	1.03699e-05	4.85443e-06	3.03139e-05	5.93233e-05	2.51004e-05	6.61273e-05	3.66752e-05	6.12698e-05	2.6403e-05	4.89741e-05	8.92982e-05	5.22332e-05	6.06858e-05	1.84891e-05	0.000117767	5.40778e-07	0.000129976	-0.000232216	1.59062e-05	-0.0020161			18.8081	-3.01076	-3.4473	-6.94477
	1.27714	0.000282454	0.000241665	0.000246117	0.000306388	0.000274983	0.00022244	0.00030303	0.000250166	0.000240705	0.000315363	0.00028078	0.000235176	0.000279511	0.000304382	0.000277678	0.000241652	0.000258316	0.000299606	0.000326891	0.000304489		1.27714	4.73633e-05	3.04983e-06	4.58363e-05	8.84238e-05	7.24707e-05	7.23155e-05	6.24707e-05	6.0275e-05	2.95708e-05	6.90942e-05	8.08782e-05	7.84033e-05	6.70255e-05	3.56272e-05	5.13831e-05	-1.50195e-06	6.93512e-05	-0.000189526	-0.000496401	-0.000355251			18.8388	-3.40714	-3.66078	-6.97642
	1.28738	0.000268512	0.000237563	0.00027481	0.000275362	0.000274979	0.000213255	0.000269305	0.000276701	0.000260246	0.000311523	0.000238573	0.000270257	0.000303666	0.000291814	0.000285765	0.000244086	0.000273628	0.000264938	0.00028509	0.00030534		1.28738	6.41368e-05	2.10151e-05	6.12972e-05	9.22936e-05	9.36792e-05	0.00011714	4.83063e-05	6.12942e-05	3.75408e-05	4.46438e-05	3.82835e-05	6.97152e-05	6.20477e-05	3.94735e-05	4.32425e-05	-2.74628e-06	5.47724e-06	-8.26153e-05	-0.000666062	0.00113405			18.8695	-3.024	-3.8739	-6.90468
	1.29762	0.00026862	0.000257802	0.000302323	0.000253262	0.000270748	0.000220797	0.000241285	0.000318877	0.000273762	0.000291065	0.000261059	0.00027544	0.000323467	0.000264915	0.000268676	0.000241458	0.000276501	0.000237153	0.000242972	0.000294314		1.29762	4.48891e-05	3.89447e-05	6.07332e-05	5.1364e-05	4.86396e-05	0.000118098	2.83181e-05	5.42897e-05	5.73762e-05	1.12555e-05	3.92531e-05	2.7208e-05	4.25822e-05	2.6621e-05	6.49163e-05	1.51653e-05	-1.90298e-05	5.5729e-05	-0.000524653	0.0019307			18.9002	-3.00333	-4.00906	-7.38489
	1.30786	0.000280505	0.000293934	0.000304568	0.00027577	0.000274189	0.00024097	0.000251862	0.000335738	0.000275473	0.000276337	0.000302554	0.000272486	0.000305397	0.000244034	0.000255664	0.000241536	0.000274733	0.000252107	0.000258682	0.000274738		1.30786	1.97698e-05	5.4318e-05	6.16249e-05	-1.11632e-06	7.93382e-07	6.81747e-05	2.97163e-05	2.76763e-05	8.54877e-05	1.99199e-05	8.18591e-05	-2.0307e-07	3.06476e-05	3.58291e-05	5.32811e-05	5.21362e-05	-2.12206e-06	0.000178046	-0.000162527	0.00184021			18.9309	-2.99038	-4.26066	-7.42669
	1.3181	0.000280921	0.000309853	0.000285246	0.000319095	0.000281999	0.00025742	0.000280794	0.000322913	0.000274593	0.000274006	0.00029197	0.000292578	0.000260455	0.000248756	0.000288659	0.000256083	0.00027436	0.000290114	0.0003147	0.000272486		1.3181	2.06891e-05	6.79744e-05	6.98456e-05	-1.87368e-05	2.49079e-05	3.91541e-05	2.82337e-05	8.61818e-06	9.31505e-05	5.67941e-05	8.29878e-05	1.92434e-05	3.32444e-05	7.95413e-05	2.31817e-05	7.64051e-05	2.95431e-05	0.00021986	0.000254135	0.00100753			18.9617	-3.23005	-4.49053	-7.06993
	1.32834	0.000262917	0.000305605	0.000274642	0.000335232	0.000274793	0.000246665	0.000287649	0.000302335	0.000275787	0.000275314	0.000250816	0.000306617	0.000244532	0.00026755	0.000334743	0.000272799	0.000274684	0.000293954	0.000339372	0.000307206		1.32834	4.78895e-05	6.76414e-05	5.89102e-05	2.28105e-06	9.15278e-05	5.85014e-05	7.94718e-06	3.79223e-05	6.46724e-05	6.65822e-05	2.4414e-05	5.71804e-05	3.02119e-05	0.000105797	1.92171e-05	6.67256e-05	6.0486e-05	0.000168669	0.000534394	-4.2746e-05			18.9924	-3.27552	-4.73956	-7.26653
	1.33858	0.000245117	0.000307695	0.000287982	0.000307989	0.000251046	0.000216258	0.000267073	0.000285371	0.000274914	0.000267418	0.000252818	0.000278397	0.000275185	0.000276034	0.000323359	0.000275098	0.000273138	0.000249327	0.000302237	0.000352854		1.33858	8.17681e-05	4.81181e-05	3.13288e-05	3.48973e-05	0.000118513	7.85106e-05	2.23585e-06	9.80192e-05	3.14838e-05	3.39841e-05	-8.94493e-06	7.07665e-05	1.98789e-05	6.90749e-05	3.73255e-05	4.03714e-05	8.65624e-05	7.90379e-05	0.000562878	-0.000828982			19.0231	-3.57646	-4.48883	-7.31556
	1.34882	0.00025223	0.000309667	0.000306764	0.000271114	0.000244586	0.000212644	0.000246117	0.000272446	0.000263052	0.000248418	0.000293793	0.000245331	0.000306431	0.000273854	0.000264981	0.000274034	0.000274731	0.000211998	0.000249065	0.000365263		1.34882	9.82636e-05	3.14464e-05	3.40755e-05	6.46229e-05	9.02332e-05	6.27146e-05	3.42875e-05	0.000122072	3.28699e-05	2.1816e-06	3.36337e-05	6.21694e-05	3.32863e-05	1.04995e-05	5.33058e-05	2.98547e-05	9.16761e-05	1.55134e-05	0.000367633	-0.00106917			19.0538	-3.28936	-4.64794	-7.23872
	1.35906	0.000289569	0.000290291	0.000299682	0.000261527	0.00027324	0.000248416	0.000246845	0.000267258	0.000244131	0.00023223	0.000305143	0.000253266	0.000297251	0.000276938	0.000244871	0.000278767	0.000277976	0.000229132	0.000235327	0.000335206		1.35906	7.72065e-05	3.43516e-05	7.28956e-05	8.7532e-05	5.16922e-05	2.70863e-05	7.08035e-05	8.99994e-05	6.1301e-05	7.18278e-06	8.90871e-05	5.86629e-05	7.31764e-05	9.37166e-06	6.59564e-05	4.18693e-05	6.61853e-05	-9.19115e-06	0.000101648	-0.000783586			19.0845	-3.2652	-4.37003	-7.23809
	1.3693	0.000325566	0.000273057	0.000267823	0.000277639	0.000306956	0.000274674	0.000263916	0.000278674	0.000233983	0.000240073	0.000280677	0.000274337	0.000271943	0.000279433	0.000284217	0.000276051	0.0002739	0.000267713	0.000262714	0.000301922		1.3693	2.88888e-05	3.52851e-05	9.18228e-05	9.0228e-05	2.92878e-05	-2.18483e-08	7.29343e-05	5.62958e-05	7.49231e-05	2.87409e-05	8.03772e-05	6.1354e-05	9.13432e-05	6.66357e-05	7.0424e-05	5.94057e-05	2.82149e-05	-8.08456e-06	-0.000107416	-0.000183724			19.1153	-3.01557	-4.45777	-6.96717
	1.37954	0.000317545	0.000288962	0.000242726	0.000284885	0.000303084	0.000250997	0.000278954	0.000298383	0.000245027	0.000272241	0.00027685	0.000262077	0.000267636	0.000264231	0.000308185	0.000263203	0.000256997	0.000270056	0.000296408	0.00029622		1.37954	-3.39023e-07	1.38841e-05	7.22528e-05	6.28748e-05	2.18737e-05	-8.79734e-06	5.43492e-05	5.68506e-05	6.03012e-05	2.61157e-05	2.48419e-05	5.12499e-05	6.11785e-05	0.000104141	4.75934e-05	7.34721e-05	3.63407e-06	1.96774e-05	-0.000207122	0.000435466			19.146	-2.80382	-4.35763	-7.0677
	1.38978	0.000270429	0.000307488	0.000247627	0.000270593	0.000270103	0.000212379	0.000280004	0.000304228	0.00026425	0.000303206	0.000300307	0.000244157	0.000275062	0.000245156	0.000271502	0.0002724	0.000243392	0.000247508	0.000311961	0.000306777		1.38978	1.3109e-05	-2.03749e-06	6.15651e-05	2.24246e-05	3.32871e-05	8.05694e-07	5.24601e-05	5.96453e-05	4.88331e-05	2.259e-06	-3.48312e-06	3.0743e-05	2.70125e-05	8.09106e-05	9.82904e-06	9.04779e-05	4.68604e-07	7.1051e-05	-0.00018939	0.000766159			19.1767	-2.87409	-3.76781	-6.92346
	1.40002	0.000242862	0.000277934	0.000267075	0.000261645	0.00025459	0.00021309	0.000268311	0.000287881	0.000275293	0.000303389	0.000301669	0.000265701	0.000262508	0.000250783	0.000226193	0.000311607	0.000251401	0.000249795	0.00030896	0.00030783		1.40002	3.1213e-05	1.97126e-05	7.0538e-05	-1.22992e-06	5.57306e-05	2.03952e-05	6.84389e-05	3.97911e-05	6.33043e-05	-2.33113e-06	2.15438e-05	2.11997e-05	3.65476e-05	3.9275e-05	2.84475e-06	0.000104502	1.14055e-05	0.000119922	-6.20616e-05	0.000714827			19.2074	-3.07562	-3.29858	-6.96791
	1.41026	0.000260435	0.000222323	0.00027492	0.000282138	0.000281936	0.000247286	0.000251483	0.000270176	0.000285098	0.000276669	0.000278637	0.000306456	0.000240167	0.000271121	0.000229074	0.000335747	0.000279597	0.000271559	0.000294951	0.000305422		1.41026	1.68074e-05	5.59708e-05	5.10095e-05	3.37178e-06	5.96122e-05	3.06914e-05	7.07405e-05	3.26124e-05	7.6729e-05	2.79426e-05	5.67448e-05	3.13157e-05	6.66513e-05	2.7037e-05	3.995e-05	9.27412e-05	3.54794e-05	0.000130069	0.000128093	0.000405269			19.2381	-3.16364	-3.03239	-7.26184
	1.4205	0.000276365	0.000205353	0.00027161	0.000307109	0.000322961	0.000261357	0.000239431	0.000269934	0.000308923	0.000257761	0.000277366	0.000317676	0.000246771	0.000269992	0.000260974	0.000310261	0.000303632	0.000268364	0.000278526	0.000319124		1.4205	-8.49869e-07	6.75923e-05	6.70124e-06	2.13146e-05	3.91708e-05	1.89581e-05	4.91626e-05	6.59563e-05	5.65415e-05	6.02878e-05	5.84164e-05	4.97641e-05	6.10431e-05	4.04823e-05	7.75309e-05	5.56064e-05	6.97622e-05	9.45667e-05	0.000262302	3.80434e-05			19.2689	-3.01679	-3.11062	-7.17029
	1.43074	0.000255306	0.000237176	0.00027885	0.000297523	0.000334181	0.000240165	0.000239997	0.000275169	0.000323839	0.000273992	0.000301088	0.000303678	0.000286598	0.000248991	0.000275687	0.000274294	0.000302096	0.000246909	0.000268424	0.000339908		1.43074	1.98843e-05	6.20487e-05	9.05903e-06	3.27812e-05	3.23662e-05	-2.72363e-06	3.10672e-05	0.000101351	2.61868e-05	6.15988e-05	3.55301e-05	6.16712e-05	1.76257e-05	5.69204e-05	7.38724e-05	3.04892e-05	9.5115e-05	4.31995e-05	0.000255455	-0.000253687			19.2996	-3.2276	-2.96415	-6.79144
	1.44098	0.000241685	0.000267706	0.000297771	0.000260276	0.000305107	0.00022537	0.000248385	0.000260531	0.000296741	0.000303643	0.00030427	0.000289134	0.00031339	0.000244138	0.000270766	0.000278132	0.000272018	0.000249101	0.000271748	0.000331697		1.44098	5.71297e-05	5.72962e-05	6.60254e-05	3.28328e-05	6.27556e-05	-1.04862e-05	3.43936e-05	8.86585e-05	3.64892e-05	4.06795e-05	2.22845e-05	5.37887e-05	-9.73156e-06	6.66587e-05	4.24334e-05	3.96767e-05	8.82324e-05	7.75123e-06	0.000150083	-0.00040455			19.3303	-2.92978	-2.78279	-6.53285
	1.45122	0.000273567	0.000274384	0.000304708	0.000241904	0.00026407	0.000251667	0.000248305	0.000232791	0.000250407	0.000304681	0.000279357	0.000271565	0.000294137	0.000266326	0.000271312	0.000306529	0.000236161	0.000271024	0.000286144	0.000290082		1.45122	6.75073e-05	3.54321e-05	9.41995e-05	2.96929e-05	9.99488e-05	3.89344e-06	3.67061e-05	3.88722e-05	7.9078e-05	3.06878e-05	2.84076e-05	2.66643e-05	1.11823e-05	6.43314e-05	2.73288e-05	6.25992e-05	4.98025e-05	-8.98242e-07	5.79161e-05	-0.000362159			19.361	-2.94717	-2.59375	-6.43725
	1.46146	0.000304819	0.000281939	0.000287674	0.000259262	0.00024166	0.000292709	0.00023722	0.000228979	0.000250053	0.000271254	0.000263146	0.000247727	0.000254491	0.000291104	0.000279794	0.00030406	0.000226746	0.000276593	0.000302564	0.000262784		1.46146	6.14109e-05	-3.35189e-06	5.74066e-05	2.96177e-05	0.000105294	2.47139e-05	1.7135e-05	2.97844e-06	8.81492e-05	4.37614e-05	4.13177e-05	1.05337e-05	5.00304e-05	5.33392e-05	4.30073e-05	7.90499e-05	1.06671e-05	7.34568e-06	3.14617e-05	-0.000159442			19.3917	-2.66765	-2.59153	-6.65137
	1.4717	0.000282753	0.000303588	0.000267479	0.00028131	0.000249783	0.000304118	0.000237408	0.000263725	0.000302335	0.000242966	0.000272336	0.00024673	0.000246942	0.000303882	0.000278681	0.000271132	0.0002557	0.000273383	0.000310979	0.000291537		1.4717	6.53605e-05	-3.06824e-06	1.87565e-05	3.11392e-05	8.39901e-05	2.95997e-05	-9.37435e-07	5.32554e-06	3.91725e-05	6.22513e-05	5.83205e-05	3.93157e-05	6.02581e-05	5.64167e-05	6.07103e-05	9.3307e-05	4.51566e-07	2.57526e-05	2.47446e-05	9.13214e-05			19.4225	-2.1358	-2.52482	-6.32282
	1.48194	0.000245504	0.000308424	0.000267535	0.000280793	0.000281495	0.000286173	0.000259246	0.000300662	0.000341284	0.000240319	0.000288226	0.000278858	0.000281273	0.000302633	0.000262657	0.000266062	0.000293964	0.000288306	0.000307157	0.000347906		1.48194	6.247e-05	5.44838e-05	2.22704e-05	3.11333e-05	6.52407e-05	1.33868e-05	1.07138e-05	2.52109e-05	-9.01273e-06	6.69284e-05	8.04749e-05	9.64379e-05	4.03995e-05	8.12944e-05	5.32102e-05	9.28765e-05	1.66945e-05	5.61968e-05	3.05337e-06	0.000279709			19.4532	-1.99282	-2.07813	-5.99817
	1.49218	0.000249157	0.000276183	0.00028047	0.00027024	0.000316149	0.000271767	0.000275688	0.000296973	0.000326584	0.00024398	0.000303567	0.000309813	0.000316673	0.000281202	0.000246628	0.000314578	0.000304405	0.000304949	0.000285094	0.000365889		1.49218	3.8773e-05	9.20011e-05	3.44408e-05	3.01953e-05	6.1181e-05	-2.80059e-06	3.00533e-05	2.94488e-05	5.29281e-07	6.03979e-05	9.2048e-05	0.000123622	2.968e-05	9.41302e-05	3.3651e-05	5.24491e-05	3.71999e-05	8.85755e-05	3.63909e-07	0.000350609			19.4839	-2.05613	-2.34971	-5.99592
	1.50242	0.000274237	0.000238586	0.000280747	0.000270627	0.000322314	0.000261115	0.000263304	0.000259441	0.000297608	0.000239024	0.000322339	0.000311778	0.000317121	0.00024849	0.000241803	0.000355296	0.000286171	0.000292846	0.000248025	0.000329467		1.50242	3.03257e-05	5.26758e-05	3.07194e-05	3.02411e-05	6.34614e-05	7.8703e-06	2.05961e-05	9.8826e-06	4.51846e-05	5.72728e-05	8.00493e-05	9.55779e-05	4.82269e-05	6.7967e-05	3.31351e-05	1.13891e-06	5.26814e-05	9.66424e-05	5.31013e-05	0.000292065			19.5146	-1.59787	-2.29291	-5.77177
	1.51266	0.00027645	0.000244527	0.000266958	0.000277679	0.000284739	0.000232521	0.000245436	0.000232423	0.000297073	0.000247383	0.000335561	0.000303408	0.000292794	0.00024158	0.000243841	0.000322595	0.00027015	0.000275024	0.000222454	0.000290735		1.51266	5.40353e-05	-3.25969e-07	3.63395e-05	3.09646e-05	5.55344e-05	4.29184e-05	4.82392e-07	-6.49772e-06	6.63841e-05	6.23456e-05	6.1801e-05	5.012e-05	6.69854e-05	3.33209e-05	5.53749e-05	7.55452e-06	6.62136e-05	6.57349e-05	0.000129617	0.000131989			19.5453	-1.13861	-2.56476	-4.94941
	1.5229	0.000274856	0.000285308	0.000266446	0.00027712	0.000230524	0.000205889	0.000247272	0.000237636	0.000307094	0.000280594	0.000326585	0.000304418	0.000275919	0.000266114	0.000242905	0.000244457	0.000271144	0.000285274	0.000241665	0.000293025		1.5229	6.08991e-05	1.29479e-05	5.66957e-05	3.09027e-05	2.36061e-05	6.57199e-05	1.4634e-05	1.30278e-05	5.56463e-05	6.59312e-05	5.80179e-05	2.98062e-05	5.01564e-05	3.41928e-05	7.33566e-05	6.68106e-05	6.90274e-05	1.96476e-05	0.00015428	-2.25534e-05			19.5761	-0.995579	-2.0055	-5.06023
	1.53314	0.000295069	0.000304863	0.000289124	0.000271663	0.000211773	0.00022923	0.0002478	0.000251409	0.0002923	0.000308239	0.000305156	0.000302908	0.00027568	0.000276077	0.000242999	0.000213918	0.000275959	0.000304791	0.000288504	0.000316573		1.53314	2.42238e-05	6.37633e-05	5.79404e-05	3.02675e-05	-1.74788e-05	5.29328e-05	5.41822e-05	6.15953e-05	5.20924e-05	5.8701e-05	6.12691e-05	3.22735e-05	9.98784e-06	5.92304e-05	6.5708e-05	9.01318e-05	5.13021e-05	-5.85475e-08	0.000103405	-6.99831e-05			19.6068	-0.511796	-2.26723	-4.59894
	1.54338	0.000304424	0.000276157	0.000306268	0.000272475	0.000247497	0.000286932	0.000224561	0.000248266	0.000261748	0.00029765	0.000295476	0.00028614	0.000276422	0.000250672	0.000253703	0.000260614	0.00027493	0.000296354	0.000305324	0.000316514		1.54338	9.01781e-08	7.85544e-05	3.64724e-05	3.03718e-05	-2.07777e-05	3.10987e-05	6.58448e-05	9.24534e-05	6.96146e-05	4.23906e-05	5.86351e-05	3.35003e-05	-6.86016e-06	6.19885e-05	3.64003e-05	4.0468e-05	3.16259e-05	1.37618e-05	3.13014e-05	-2.53822e-05			19.6375	-0.177332	-2.24421	-3.9043
	1.55362	0.00027197	0.000241909	0.000294879	0.000276696	0.000298589	0.000302066	0.000211174	0.000237052	0.000244987	0.000267393	0.000305858	0.000270145	0.000271619	0.000242827	0.000272354	0.000318283	0.000275304	0.000274717	0.000272881	0.000284397		1.55362	2.9277e-05	5.91525e-05	3.14526e-05	3.06454e-05	3.171e-05	3.70857e-05	3.72136e-05	7.55844e-05	7.36527e-05	2.75244e-05	6.18009e-05	2.89076e-05	1.7814e-05	3.27512e-05	3.85338e-06	-9.41314e-06	3.64538e-05	3.06096e-05	-4.18456e-06	2.49059e-05			19.6682	0.14909	-1.93673	-3.66244
	1.56386	0.00024312	0.000246667	0.000276592	0.000275505	0.000313093	0.000248372	0.00023961	0.000240379	0.000244881	0.000259907	0.000314478	0.00027023	0.000272369	0.000287295	0.000280585	0.000323716	0.000277027	0.000270469	0.000243771	0.000250728		1.56386	6.30832e-05	5.25475e-05	5.38775e-05	3.00732e-05	8.55899e-05	5.82278e-05	1.42868e-05	3.79718e-05	4.52511e-05	2.40301e-05	7.96108e-05	2.85423e-05	5.29451e-05	3.99182e-06	-1.32974e-05	3.47979e-06	5.60609e-05	3.06538e-05	4.96653e-07	5.00477e-05			19.6989	0.548538	-1.57858	-3.57745
	1.5741	0.000266747	0.000279708	0.000276713	0.000276003	0.000289181	0.000192144	0.000273225	0.000251362	0.00024479	0.00028332	0.000303233	0.000276567	0.000275383	0.000335385	0.000275204	0.000294143	0.000267338	0.000274533	0.000254355	0.00024334		1.5741	5.22022e-05	6.27632e-05	6.53632e-05	3.48853e-05	8.18713e-05	5.63848e-05	2.70496e-05	2.78887e-05	2.41369e-05	3.55162e-05	9.21062e-05	3.17462e-05	6.5594e-05	-1.05876e-07	-2.59806e-06	4.19397e-05	6.17652e-05	3.0988e-05	1.57599e-05	8.49986e-05			19.7297	0.794631	-1.42049	-3.50162
	1.58434	0.000310198	0.000301536	0.000278322	0.000295148	0.000271994	0.000194392	0.00025838	0.00024729	0.000245191	0.000304746	0.0002819	0.000275464	0.000256943	0.000331118	0.000277471	0.000275694	0.000248855	0.000260608	0.000275643	0.000264123		1.58434	2.81738e-05	6.49893e-05	4.14586e-05	5.36154e-05	4.20343e-05	3.60851e-05	4.53052e-05	5.34854e-05	4.89518e-05	5.40195e-05	8.05844e-05	3.10605e-05	6.18473e-05	1.42518e-05	3.0811e-05	4.46696e-05	5.83931e-05	4.73855e-05	3.21619e-05	0.000120412			19.7604	0.629001	-1.01073	-3.63868
	1.59458	0.000307398	0.000305061	0.000258047	0.000326687	0.000286229	0.000237391	0.000216676	0.000238392	0.000261727	0.000300691	0.000274646	0.000276396	0.000218155	0.000304629	0.000303513	0.000275061	0.000244226	0.000243308	0.000275434	0.000292621		1.59458	2.86871e-05	6.06654e-05	7.38891e-06	7.40429e-05	2.45365e-05	3.05985e-05	3.32215e-05	7.64386e-05	8.74213e-05	6.14551e-05	5.8321e-05	3.25195e-05	6.3294e-05	3.10875e-05	6.04364e-05	2.19499e-05	7.15796e-05	6.16665e-05	5.11652e-05	0.000105001			19.7911	0.822476	-1.23645	-3.63981
	1.60482	0.000265851	0.000305298	0.000242209	0.000338973	0.000304611	0.000270105	0.00020846	0.000264273	0.000291615	0.000282219	0.000277925	0.000293272	0.000205998	0.00031052	0.000325323	0.000274414	0.000264003	0.000251407	0.000275787	0.000305788		1.60482	2.85371e-05	6.12494e-05	-2.14013e-06	6.82561e-05	3.03166e-05	3.44207e-05	1.16436e-05	6.65291e-05	8.16186e-05	4.60237e-05	4.24154e-05	4.89545e-05	6.47144e-05	3.75131e-05	5.87941e-05	2.00102e-05	9.10421e-05	5.11288e-05	6.18017e-05	4.70744e-05			19.8218	0.943765	-0.981587	-3.72124
	1.61506	0.000250712	0.000303846	0.000265312	0.000313879	0.000296486	0.000271764	0.00024204	0.000318797	0.000307329	0.000272195	0.000272627	0.000314799	0.000246898	0.000337205	0.000305414	0.000277198	0.000291052	0.000277964	0.00029461	0.000296641		1.61506	6.68601e-06	6.04709e-05	1.21621e-05	3.88411e-05	2.58316e-05	1.92685e-05	2.8422e-05	3.96341e-05	4.16833e-05	2.19055e-05	2.72685e-05	7.23305e-05	4.31539e-05	2.96625e-05	3.07923e-05	3.93612e-05	8.04655e-05	2.77965e-05	6.0531e-05	5.55518e-06			19.8525	1.03566	-1.14313	-3.61772
	1.6253	0.000286219	0.000289932	0.000301794	0.000279043	0.000277457	0.000252654	0.000271096	0.000338892	0.000293839	0.000273366	0.000265034	0.00031442	0.000297826	0.000333286	0.000258237	0.000294713	0.00030488	0.000287429	0.000304644	0.000278839		1.6253	4.05357e-06	5.73779e-05	2.82074e-05	2.77229e-05	2.43882e-05	-2.57526e-08	7.62774e-05	2.99405e-05	2.75838e-05	1.89512e-05	7.91811e-06	7.28346e-05	6.41986e-06	2.14388e-05	1.34872e-05	4.16897e-05	4.19226e-05	2.01731e-05	6.2142e-05	-3.52788e-07			19.8833	1.39349	-0.815474	-3.2578
	1.63554	0.000317216	0.000268069	0.000295712	0.000274869	0.000274559	0.000233946	0.000274696	0.000294314	0.000275551	0.000274189	0.000280333	0.000289299	0.000309948	0.000301098	0.000244721	0.000309866	0.00029895	0.000270126	0.00028677	0.000262877		1.63554	5.0996e-05	6.45248e-05	4.00568e-05	4.98188e-05	5.69923e-05	1.00587e-05	9.20142e-05	3.75899e-05	5.18656e-05	4.36457e-05	1.45334e-07	3.97199e-05	7.55416e-08	3.33416e-05	3.19486e-05	1.62185e-05	1.77459e-05	3.41067e-05	6.74365e-05	-1.54768e-06			19.914	1.63875	-0.850601	-2.88391
	1.64578	0.000290903	0.000250571	0.000250783	0.000300761	0.000276829	0.000237063	0.00027166	0.000246124	0.000282219	0.000272405	0.000304461	0.000271864	0.000304366	0.000288395	0.000279112	0.000293059	0.000280059	0.000248208	0.000274308	0.000247331		1.64578	0.000104694	7.15381e-05	5.80566e-05	6.2902e-05	9.11534e-05	3.01203e-05	4.84045e-05	3.26446e-05	7.13224e-05	6.40528e-05	1.41787e-05	5.0772e-06	4.7744e-05	5.64239e-05	6.18345e-05	-3.05282e-06	2.5901e-05	5.24204e-05	5.70059e-05	-2.43078e-06			19.9447	1.6737	-0.786773	-2.50993
	1.65602	0.000233152	0.000241859	0.000223298	0.000311077	0.000260273	0.000260837	0.000274703	0.000257718	0.00030266	0.000280209	0.000300112	0.000289624	0.000313951	0.000309664	0.000305502	0.000252093	0.0002648	0.000245444	0.000290779	0.000234834		1.65602	0.000111455	5.01317e-05	7.43339e-05	4.22933e-05	6.88618e-05	1.98936e-05	-1.20618e-06	9.16501e-06	6.53711e-05	4.89183e-05	3.67267e-05	3.62701e-06	0.000103304	5.96455e-05	5.9236e-05	1.3166e-05	3.92345e-05	6.27866e-05	3.48388e-05	2.10476e-05			19.9754	1.5984	-0.688235	-1.81691
	1.66626	0.000213985	0.000240403	0.000240747	0.000280412	0.00024377	0.000275839	0.000266475	0.000303067	0.000296414	0.000299159	0.000276525	0.000326456	0.000310177	0.000321723	0.000280859	0.000235085	0.000270703	0.000261151	0.00030672	0.000241086		1.66626	7.83003e-05	1.09163e-05	6.41182e-05	2.93897e-05	9.59127e-06	-3.21156e-07	-9.44484e-07	-4.55045e-07	5.13285e-05	1.18786e-05	5.3472e-05	2.47805e-05	9.9281e-05	4.08642e-05	2.30836e-05	4.94001e-05	3.40941e-05	6.41591e-05	3.33561e-05	5.69163e-05			20.0061	1.70433	-0.10953	-1.62678
	1.6765	0.000248706	0.000248062	0.000269794	0.000240948	0.00026092	0.000262097	0.000241838	0.000311093	0.00025544	0.000303008	0.000279791	0.000339655	0.000261635	0.000297466	0.000239708	0.000269846	0.000286243	0.000278196	0.000292042	0.00026281		1.6765	4.37279e-05	3.15871e-06	3.39751e-05	5.17148e-05	-1.10267e-05	1.70079e-05	3.36907e-05	1.74337e-05	3.55162e-05	-3.4481e-06	6.41371e-05	3.44771e-05	3.96223e-05	2.99177e-05	-1.08869e-06	6.94193e-05	1.69741e-05	5.97445e-05	5.38476e-05	7.12073e-05			20.0369	1.37584	0.263518	-0.931049
	1.68674	0.000285516	0.000263881	0.00027522	0.000241927	0.000299942	0.000244254	0.00022795	0.000275259	0.000220246	0.000266906	0.00030319	0.000315709	0.00021568	0.00027011	0.000229876	0.000323036	0.000279268	0.000280416	0.000268518	0.000274687		1.68674	2.5362e-05	3.9357e-05	2.94292e-05	6.26006e-05	2.36922e-05	5.55035e-05	5.67726e-05	3.06543e-05	1.70249e-05	1.8123e-05	6.62556e-05	3.04764e-05	3.4314e-07	3.29021e-05	1.13985e-05	6.49571e-05	1.98451e-06	5.69447e-05	5.97833e-05	6.26746e-05			20.0676	1.3111	0.20043	-1.43972
	1.69698	0.000285453	0.000282464	0.000258039	0.000278549	0.000317087	0.000258579	0.000248305	0.000245018	0.000234525	0.0002143	0.000298379	0.000283827	0.000220853	0.000281201	0.000247915	0.000340589	0.000249665	0.000271208	0.000266696	0.000268953		1.69698	2.39836e-05	6.98332e-05	6.49961e-05	2.71414e-05	5.16668e-05	6.07756e-05	6.15337e-05	1.59756e-05	2.35761e-05	4.27212e-05	5.69653e-05	3.77952e-05	2.2998e-05	2.7968e-05	3.35534e-05	5.73556e-05	-5.39214e-06	6.55367e-05	4.10055e-05	5.01245e-05			20.0983	1.05758	0.396507	-0.96983
	1.70722	0.000265069	0.000298664	0.000244205	0.000304859	0.000306746	0.000298406	0.000276051	0.000244354	0.000295233	0.000202558	0.000273654	0.000273778	0.000243479	0.000307211	0.000265167	0.000316079	0.000241931	0.000267951	0.000278479	0.000273502		1.70722	3.85913e-05	5.28638e-05	9.18663e-05	-1.43254e-07	3.43237e-05	3.51268e-05	6.38976e-05	-1.43818e-07	7.32662e-05	3.7501e-05	5.30186e-05	5.76442e-05	6.00142e-05	2.10866e-05	3.62178e-05	5.96305e-05	-1.48585e-06	8.35116e-05	2.85206e-05	3.22373e-05			20.129	1.15648	0.470912	-0.843837
	1.71746	0.00024935	0.000308753	0.000250318	0.000302638	0.000298931	0.000313535	0.000270735	0.000247937	0.000359329	0.000243142	0.000286253	0.000278431	0.00024048	0.000296304	0.000276975	0.000286203	0.000267347	0.000280782	0.00027932	0.000295961		1.71746	5.65691e-05	1.04099e-05	6.9802e-05	3.61955e-05	9.78977e-06	2.41039e-05	5.92877e-05	1.06971e-05	0.000120153	2.3231e-05	7.13667e-05	6.13435e-05	5.57764e-05	3.91121e-05	2.94495e-05	6.31628e-05	1.28712e-05	9.32259e-05	3.20792e-05	6.95474e-06			20.1597	0.986223	0.585429	-0.693298
	1.7277	0.000239773	0.000308288	0.000275683	0.000305363	0.000304819	0.000281532	0.000244396	0.000243878	0.000378944	0.000275766	0.000327795	0.000276487	0.000243728	0.000255967	0.000282085	0.000275172	0.000276255	0.000298621	0.000271278	0.000305334		1.7277	6.21223e-05	-7.04263e-06	2.95419e-05	9.23379e-05	2.77749e-05	3.04898e-05	4.11914e-05	3.18676e-05	0.000103721	4.57184e-05	9.19826e-05	3.73851e-05	3.09503e-05	6.36153e-05	2.96681e-05	6.17945e-05	2.92835e-05	7.94289e-05	2.49099e-05	-1.72382e-07			20.1905	0.574455	0.570664	-0.447287
	1.73794	0.000238651	0.000301056	0.000300018	0.000328315	0.000300531	0.000248129	0.000249362	0.000251367	0.000342054	0.000253795	0.000325475	0.00026671	0.000271775	0.000247332	0.000268772	0.000273994	0.00024069	0.000306821	0.000270668	0.000285999		1.73794	6.02556e-05	1.6444e-05	1.87962e-05	9.53461e-05	7.38866e-05	2.07034e-05	3.014e-05	3.60333e-05	3.77637e-05	9.45793e-05	8.43622e-05	7.77842e-06	3.47111e-05	5.26427e-05	3.01057e-05	6.09126e-05	4.44365e-05	4.57005e-05	4.06151e-06	1.77588e-05			20.2212	0.20713	0.575492	-0.410632
	1.74818	0.000254144	0.000301072	0.00030457	0.000334722	0.000275347	0.000269359	0.000287537	0.00027816	0.000279968	0.000216905	0.000268604	0.000271334	0.00027403	0.000284178	0.000245961	0.000274156	0.000213622	0.000305624	0.000277906	0.00027478		1.74818	6.41652e-05	5.2127e-05	3.16794e-05	5.93216e-05	9.20913e-05	8.86082e-07	4.40967e-05	3.00475e-05	-8.7202e-06	0.000102298	6.3401e-05	-1.27392e-06	6.19093e-05	2.70515e-05	2.71199e-05	6.1479e-05	6.07157e-05	1.10165e-05	5.51528e-06	3.07438e-05			20.2519	0.115799	0.495339	-0.52898
	1.75842	0.000272239	0.000311536	0.000288839	0.00029253	0.000247834	0.000316277	0.000305388	0.000291821	0.00024463	0.000224632	0.000232772	0.000300822	0.000239081	0.000310667	0.000249564	0.000276797	0.000238449	0.000305454	0.000278939	0.000292878		1.75842	6.5597e-05	6.32669e-05	3.57612e-05	4.70362e-05	6.34277e-05	1.19958e-05	6.63371e-05	3.00361e-05	-1.75344e-06	4.73477e-05	6.7667e-05	1.79625e-05	7.26657e-05	4.40141e-05	3.4979e-05	5.94958e-05	6.23824e-05	-2.75075e-06	4.15912e-05	3.42458e-05			20.2826	-0.0233063	0.588892	-0.5391
	1.76866	0.000271902	0.000312041	0.000273208	0.000240143	0.000244435	0.000308227	0.000285475	0.000268461	0.000260272	0.000266222	0.000256928	0.000333638	0.000247433	0.000291939	0.000284996	0.000276122	0.000274766	0.000306939	0.000267114	0.000304695		1.76866	5.03057e-05	4.1962e-05	2.99888e-05	6.28044e-05	3.01808e-05	5.821e-05	7.02746e-05	3.01404e-05	3.28642e-05	1.1659e-06	8.91899e-05	5.65274e-05	5.99816e-05	8.59977e-05	5.35285e-05	6.02871e-05	3.03943e-05	1.44602e-05	7.41185e-05	6.48425e-05			20.3133	-0.230718	0.713604	-0.922605
	1.7789	0.00026907	0.000285315	0.000270245	0.000237099	0.000270227	0.000242005	0.000274895	0.000237779	0.000304598	0.000292333	0.000289819	0.000328736	0.000313738	0.000264419	0.000309904	0.00026234	0.000267884	0.000299318	0.000249991	0.000276325		1.7789	3.21997e-05	1.6605e-05	2.9623e-05	5.92169e-05	3.4468e-05	9.55742e-05	5.53996e-05	2.60571e-05	6.09974e-05	2.14889e-05	8.32314e-05	9.06576e-05	4.31279e-05	8.18023e-05	6.26427e-05	6.64188e-05	-8.44397e-06	4.77245e-05	7.06418e-05	0.000115892			20.3441	-0.0823777	0.257541	-1.10172
	1.78914	0.000293733	0.000250622	0.000275526	0.000282303	0.00030745	0.000213399	0.000294432	0.000252089	0.000327026	0.000302557	0.000283829	0.000278723	0.000332203	0.000266914	0.000293744	0.000245642	0.000243375	0.000281055	0.000239688	0.000241463		1.78914	3.65883e-05	2.15913e-05	3.02571e-05	2.4618e-05	6.31614e-05	9.22291e-05	3.80138e-05	3.41061e-05	7.00281e-05	5.93503e-05	4.49729e-05	9.31701e-05	2.90807e-05	3.91478e-05	6.03788e-05	6.32158e-05	2.14075e-06	6.4331e-05	5.1122e-05	0.000118489			20.3748	0.409607	0.0236734	-1.16641
	1.79938	0.000329964	0.000243203	0.000277678	0.000314693	0.000321929	0.000261813	0.000305238	0.000306589	0.000303852	0.000322276	0.000262496	0.000232018	0.000260489	0.000278153	0.000263308	0.000240438	0.000249799	0.000272585	0.000241335	0.000246647		1.79938	5.68831e-05	5.21049e-05	2.6119e-05	-3.32434e-06	7.45063e-05	5.97979e-05	2.79736e-05	5.54436e-05	6.0735e-05	4.40139e-05	1.74144e-05	6.21437e-05	2.17641e-05	4.10266e-05	6.3795e-05	4.37607e-05	5.96794e-05	5.05093e-05	5.2873e-05	5.25408e-05			20.4055	-0.030508	-0.205519	-1.01188
	1.80962	0.000329777	0.000266725	0.000272685	0.000298428	0.000301494	0.000305502	0.00028637	0.000338248	0.000261631	0.000336378	0.000266909	0.000243269	0.000212408	0.00026	0.000261486	0.000243903	0.000276868	0.000292356	0.000247338	0.000279796		1.80962	6.05625e-05	6.52927e-05	3.47691e-05	4.30634e-06	5.8623e-05	2.996e-05	2.7306e-05	5.83749e-05	4.2172e-05	2.90802e-06	2.37709e-05	3.10039e-05	3.41307e-05	9.98696e-05	6.72157e-05	3.06055e-05	9.21982e-05	3.18485e-05	7.6608e-05	-5.54417e-06			20.4362	-0.277506	-0.18614	-1.26809
	1.81986	0.000287858	0.000287124	0.000258295	0.000259231	0.000274989	0.000279012	0.00027061	0.000309463	0.000243872	0.000313008	0.000290734	0.000291082	0.000259272	0.000227034	0.000288416	0.000243322	0.000284288	0.000321177	0.000246408	0.000290762		1.81986	3.80491e-05	3.84014e-05	6.72623e-05	3.7171e-05	3.84737e-05	2.20102e-05	3.35018e-05	2.59497e-05	3.01558e-05	8.47637e-06	4.41145e-05	3.24817e-05	5.70471e-05	0.000130742	5.1391e-05	4.18163e-05	6.37855e-05	3.69831e-05	9.23477e-05	1.70371e-06			20.4669	-0.288872	0.0977124	-1.78557
	1.8301	0.000247894	0.000279853	0.000239083	0.000243707	0.000276714	0.000243153	0.000273975	0.000261865	0.000247887	0.000276545	0.000304457	0.000304736	0.000309735	0.000229204	0.000306886	0.000243883	0.000272454	0.000317124	0.000239316	0.000268215		1.8301	1.77314e-05	3.95575e-06	9.73406e-05	6.68029e-05	3.00006e-05	3.1562e-05	3.55175e-05	-7.1838e-06	2.95833e-05	5.7187e-05	5.84256e-05	6.21169e-05	5.89934e-05	8.83112e-05	3.13221e-05	6.0686e-05	2.76783e-05	5.64996e-05	8.37609e-05	3.73844e-05			20.4977	-0.258258	0.0705715	-2.03403
	1.84034	0.000241492	0.000255256	0.000232228	0.000260153	0.000287833	0.000266856	0.000270095	0.000255101	0.000242374	0.000274764	0.000303591	0.000267271	0.000280268	0.000272576	0.000296789	0.000255799	0.000257749	0.000274724	0.000240612	0.000244746		1.84034	2.54394e-05	2.58802e-06	8.93053e-05	7.22499e-05	2.96741e-05	3.76645e-05	2.29129e-05	3.03445e-06	3.05006e-05	9.02403e-05	6.59741e-05	8.82545e-05	3.84036e-05	2.64657e-05	3.76007e-05	6.57788e-05	3.63876e-05	6.43312e-05	6.53536e-05	5.38607e-05			20.5284	-0.0921665	-0.0810783	-1.93334
	1.85058	0.000256961	0.000243126	0.000253631	0.000277125	0.000266661	0.000308018	0.000250934	0.000287907	0.000230621	0.000304121	0.000304379	0.000244272	0.00023826	0.000304829	0.000278195	0.000274709	0.00024048	0.000243767	0.000254991	0.000247062		1.85058	4.94201e-05	2.64682e-05	4.56241e-05	5.47728e-05	3.06859e-05	2.90291e-05	4.3191e-06	4.72505e-05	2.87331e-05	9.2127e-05	6.40667e-05	9.13705e-05	3.19692e-05	9.80918e-07	5.77229e-05	6.12536e-05	6.59049e-05	6.14489e-05	5.71054e-05	6.56288e-05			20.5591	-0.048163	-0.057134	-2.05955
	1.86082	0.000272681	0.000260803	0.000289155	0.000264233	0.000223353	0.00029098	0.000241741	0.000309622	0.000250234	0.000317825	0.000303333	0.00027307	0.000264975	0.000292913	0.000274578	0.00028245	0.000229897	0.000261654	0.000271241	0.000264932		1.86082	6.12467e-05	3.90732e-05	6.11633e-06	3.53704e-05	2.96516e-05	2.11202e-05	1.66512e-06	7.09832e-05	3.14823e-05	8.32132e-05	4.80181e-05	7.71492e-05	5.10899e-05	1.10301e-06	5.90409e-05	5.14196e-05	7.10102e-05	6.33686e-05	6.01148e-05	8.74908e-05			20.5898	-0.0767143	0.119763	-2.39467
	1.87106	0.000278674	0.000299736	0.00030938	0.000234525	0.000218364	0.000234755	0.000244884	0.000296246	0.000291856	0.000305024	0.000281668	0.000307169	0.000318537	0.000273995	0.000277061	0.000273913	0.000252853	0.000299499	0.000283218	0.000276687		1.87106	5.78374e-05	3.20582e-05	4.29071e-06	3.06204e-05	3.27763e-05	3.45007e-05	2.04181e-05	4.63621e-05	3.49476e-05	6.09532e-05	3.17604e-05	5.91641e-05	6.11424e-05	2.05225e-07	5.50692e-05	2.9374e-05	5.85205e-05	6.35926e-05	6.27887e-05	8.73692e-05			20.6205	-0.217375	0.144023	-1.89197
	1.8813	0.000275516	0.000324362	0.000307979	0.000228635	0.000268227	0.000206354	0.000239386	0.000275592	0.000303424	0.000295522	0.000246293	0.000297089	0.000323725	0.000286868	0.000265502	0.000256184	0.000294361	0.000304431	0.0003006	0.000276415		1.8813	6.00121e-05	2.60934e-05	3.71126e-05	3.26243e-05	5.83696e-05	5.81261e-05	3.98134e-05	7.50928e-06	2.83936e-05	2.21075e-05	3.63192e-05	4.2486e-05	4.32466e-05	3.70641e-06	8.1434e-05	1.30448e-05	5.68116e-05	4.87141e-05	6.14871e-05	5.17802e-05			20.6513	-0.510147	0.302532	-2.09468
	1.89154	0.000269438	0.000308492	0.000304201	0.000257184	0.000314097	0.00021759	0.000236795	0.000280241	0.000280642	0.000305983	0.000240319	0.000271852	0.000294326	0.000305321	0.000247625	0.00024344	0.00030136	0.000279118	0.000317986	0.000273884		1.89154	6.94486e-05	3.00919e-05	7.58454e-05	2.80411e-05	0.000107478	5.79219e-05	3.78058e-05	5.07041e-06	2.21302e-05	-2.3743e-07	5.8066e-05	2.87374e-05	2.83341e-05	2.3585e-05	0.000118503	3.42064e-05	6.2404e-05	3.21832e-05	6.18137e-05	2.59139e-05			20.682	-0.540536	0.304763	-2.07511
	1.90178	0.000273578	0.00027385	0.000305375	0.000279176	0.000302318	0.000234322	0.000264702	0.000300714	0.000277781	0.000314514	0.000282603	0.000279328	0.000277817	0.00029234	0.000242338	0.00024891	0.000264907	0.000271305	0.000309997	0.000274116		1.90178	6.30175e-05	3.30301e-05	9.4249e-05	2.51375e-05	0.00013612	2.49895e-05	1.64836e-05	4.16772e-05	3.655e-05	1.29142e-05	7.05843e-05	2.40313e-05	4.42416e-05	4.91193e-05	0.000109084	6.88749e-05	6.10972e-05	3.06934e-05	6.20992e-05	4.24346e-05			20.7127	-0.83282	0.242855	-2.19741
	1.91202	0.000289512	0.000273356	0.000303524	0.000263828	0.00026096	0.000247964	0.000300882	0.00030017	0.00030186	0.000303098	0.000332481	0.000311996	0.000270936	0.000274772	0.000244583	0.000280264	0.00024053	0.000299577	0.000272347	0.000274377		1.91202	3.88907e-05	3.07634e-05	8.33618e-05	3.83311e-05	0.00010512	-5.08384e-06	-1.40082e-07	7.40259e-05	5.90125e-05	3.19025e-05	6.26948e-05	3.37825e-05	7.00105e-05	6.12826e-05	4.9698e-05	5.55596e-05	6.37952e-05	3.15693e-05	5.07476e-05	7.06791e-05			20.7434	-1.54111	-0.164933	-1.85214
	1.92226	0.00030479	0.000312005	0.000302041	0.000241479	0.000254697	0.0002659	0.00029486	0.00026471	0.000298358	0.000281687	0.000337521	0.000332204	0.000253034	0.000282485	0.000240157	0.00031995	0.000257501	0.000323902	0.000244868	0.00027385		1.92226	3.02731e-05	2.96322e-05	4.99657e-05	5.69934e-05	4.78365e-05	4.48831e-06	1.10793e-05	7.13408e-05	5.72048e-05	4.03316e-05	5.31789e-05	5.14636e-05	7.09001e-05	5.40024e-05	-7.42339e-07	5.77542e-06	8.1198e-05	2.28782e-05	3.19866e-05	7.14921e-05			20.7741	-1.95563	-0.536942	-1.40733
	1.9325	0.00030752	0.000335715	0.000309818	0.000256717	0.000291001	0.000274793	0.00025413	0.0002226	0.000258469	0.000275077	0.000307034	0.000335869	0.000241963	0.000279594	0.000240809	0.000335323	0.000281216	0.000308889	0.000254263	0.000275397		1.9325	4.94048e-05	3.06326e-05	1.3285e-05	6.09468e-05	3.06457e-05	4.32962e-05	4.89793e-05	4.76128e-05	3.60816e-05	6.73696e-05	6.0438e-05	6.3114e-05	5.33998e-05	3.44e-05	-4.57112e-06	7.01862e-06	9.45576e-05	2.80019e-05	3.78361e-05	5.15335e-05			20.8049	-2.45106	-0.932761	-1.68498
	1.94274	0.000305181	0.000309444	0.000312233	0.000294719	0.000313025	0.000258736	0.000236824	0.000209202	0.000246314	0.000289242	0.000289997	0.00033705	0.00025963	0.000236596	0.000259173	0.000309243	0.000280382	0.000275849	0.000274075	0.000276082		1.94274	6.12451e-05	3.01794e-05	-2.69049e-06	5.79806e-05	5.31657e-05	6.63811e-05	8.05433e-05	3.21784e-05	3.32908e-05	0.000112956	7.06039e-05	6.34199e-05	5.22151e-05	1.30655e-05	1.57627e-05	7.87333e-05	8.05809e-05	6.27454e-05	8.7311e-05	3.51814e-05			20.8356	-2.67559	-0.995357	-1.75132
	1.95298	0.000305752	0.000273716	0.000288494	0.000304758	0.000291515	0.000238879	0.000264456	0.000225098	0.000283589	0.000307993	0.000304894	0.000332933	0.000285977	0.000211853	0.000274698	0.000264284	0.000271639	0.000273397	0.000266099	0.000271931		1.95298	4.3416e-05	3.07179e-05	9.42316e-06	6.98274e-05	5.92093e-05	5.33611e-05	7.06862e-05	3.10228e-05	5.34419e-05	0.00011756	6.15109e-05	6.07456e-05	7.14384e-05	4.38185e-07	2.89734e-05	0.000125917	4.47449e-05	9.14777e-05	0.000138136	2.77532e-05			20.8663	-3.56459	-1.60208	-1.62175
	1.96322	0.000304851	0.000277044	0.000253239	0.000282486	0.000269769	0.000250339	0.000298474	0.000242004	0.000310192	0.000311542	0.000318164	0.000316287	0.000285303	0.000253889	0.000263041	0.000238489	0.000272882	0.000299348	0.000244509	0.000270587		1.96322	3.08793e-05	3.27903e-05	2.8145e-05	8.89125e-05	3.75889e-05	3.20043e-05	2.80021e-05	3.13878e-05	6.0447e-05	5.50611e-05	4.72135e-05	6.16448e-05	7.36718e-05	5.96419e-06	3.83979e-05	8.36068e-05	1.0975e-05	7.409e-05	0.000123998	2.7265e-05			20.897	-4.22291	-2.24171	-1.9436
	1.97346	0.000291531	0.000307688	0.000239025	0.000273431	0.0002879	0.00029434	0.000306663	0.000242859	0.000289881	0.000302706	0.00030434	0.000300947	0.000258662	0.000303784	0.000244965	0.00025109	0.000274275	0.00030549	0.000247317	0.000283105		1.97346	5.7346e-05	3.01271e-05	2.61464e-05	8.77284e-05	3.25015e-05	3.56855e-05	5.23912e-07	2.92681e-05	4.14352e-05	-1.23396e-05	6.22957e-05	5.91247e-05	3.865e-05	2.87656e-05	5.77326e-05	1.46893e-05	-5.13297e-06	3.1305e-05	5.00443e-05	3.7945e-05			20.9277	-4.78374	-2.98353	-2.3776
	1.9837	0.000273052	0.00031886	0.000243931	0.00029578	0.000309926	0.000331783	0.000293699	0.000241645	0.000269094	0.000299471	0.000279311	0.000300556	0.000241865	0.00028781	0.000252243	0.000286035	0.00027208	0.000273102	0.000275215	0.000301431		1.9837	9.4374e-05	2.53966e-05	5.81571e-06	6.77147e-05	5.40153e-05	5.59491e-05	1.12761e-05	3.02997e-05	2.61323e-05	-2.15917e-05	9.4513e-05	4.35574e-05	2.76724e-06	4.47922e-05	7.33803e-05	5.41723e-06	-3.67005e-06	1.37825e-05	-3.03706e-07	5.56204e-05			20.9585	-4.95475	-3.99522	-2.74568
	1.99394	0.000266573	0.000301949	0.000236839	0.000310451	0.000286024	0.00032814	0.000276939	0.000254526	0.000288405	0.000307859	0.000275324	0.000307496	0.000254436	0.000244883	0.00027325	0.000309375	0.000281523	0.000243708	0.000288475	0.000302666		1.99394	9.24753e-05	3.25489e-05	-1.80872e-06	5.64752e-05	6.05396e-05	5.88794e-05	2.95706e-05	2.71914e-05	2.93711e-05	9.91602e-06	8.9293e-05	2.33876e-05	1.12304e-05	3.13503e-05	6.37372e-05	4.45803e-05	3.2045e-06	3.13625e-05	2.01202e-05	6.52013e-05			20.9892	-5.69682	-4.30024	-3.2983
	2.00418	0.000276342	0.000281712	0.000216761	0.000286928	0.000247274	0.00029191	0.000267158	0.000272247	0.000316871	0.000310948	0.000292163	0.000307631	0.000273215	0.000246616	0.000270497	0.000296777	0.000300472	0.000242095	0.000273189	0.000282702		2.00418	5.53438e-05	5.06613e-05	2.0728e-05	5.9946e-05	3.88204e-05	3.91005e-05	2.761e-05	6.86983e-06	2.67761e-05	3.03731e-05	3.68654e-05	2.0954e-05	5.04649e-05	1.12985e-05	4.48842e-05	6.65738e-05	2.20269e-06	5.41033e-05	6.33689e-05	6.29562e-05			21.0199	-6.2811	-4.63769	-4.1935
	2.01442	0.000282024	0.000273833	0.00021971	0.000255533	0.000257022	0.000263771	0.000273146	0.000271602	0.00031401	0.000300892	0.000305995	0.000302959	0.000267488	0.000274986	0.000245747	0.000260049	0.000303403	0.000243696	0.000260069	0.000265195		2.01442	2.81491e-05	6.23474e-05	4.7216e-05	6.14145e-05	2.82746e-05	2.89085e-05	2.86181e-05	-1.17097e-05	6.7634e-06	2.88954e-05	-2.07918e-06	4.16644e-05	6.59159e-05	3.1421e-05	5.87538e-05	5.41753e-05	-4.73859e-07	6.11554e-05	7.20996e-05	5.95186e-05			21.0506	-6.45573	-5.43204	-4.64925
	2.02466	0.000271797	0.000272218	0.000261262	0.000264442	0.000297805	0.000266931	0.000284052	0.000249951	0.000295505	0.000296807	0.000305707	0.000302733	0.000247488	0.000269114	0.000232647	0.000238156	0.000283428	0.000235435	0.000277898	0.000269832		2.02466	3.37494e-05	6.25553e-05	3.89402e-05	6.03225e-05	5.04901e-05	4.82032e-05	5.92079e-05	1.65473e-05	1.6283e-06	2.66908e-05	1.01483e-05	6.08554e-05	4.10103e-05	7.91887e-05	0.000103658	3.66815e-05	1.73074e-05	5.08476e-05	6.02212e-05	6.0562e-05			21.0813	-6.60417	-6.05692	-5.06662
	2.0349	0.000263627	0.00027631	0.000304348	0.000301919	0.000297687	0.000282224	0.000276132	0.000224753	0.000297683	0.000312308	0.000305557	0.000307521	0.000246516	0.000242975	0.000243819	0.000256207	0.000265091	0.000247091	0.000304343	0.000283275		2.0349	5.35702e-05	6.07235e-05	4.25866e-06	6.54508e-05	7.35475e-05	7.31703e-05	9.10426e-05	9.32625e-05	3.88776e-05	3.49971e-05	3.2473e-05	5.49982e-05	1.58273e-05	9.08971e-05	0.000122775	2.64519e-05	5.3044e-05	2.73522e-05	6.01728e-05	6.23523e-05			21.1121	-6.80628	-6.46153	-6.01189
	2.04514	0.000280782	0.000290879	0.00030919	0.000310776	0.000255185	0.000280473	0.00025079	0.000213594	0.000315778	0.000319258	0.000309021	0.000308324	0.000268466	0.000247844	0.000253063	0.000293106	0.000268993	0.000274382	0.000302459	0.000279579		2.04514	6.11197e-05	5.07554e-05	-4.6318e-06	6.43683e-05	6.74295e-05	7.0605e-05	7.87382e-05	0.000150608	9.0115e-05	5.11411e-05	1.99708e-05	3.53758e-05	2.38561e-05	6.25237e-05	8.45649e-05	1.09767e-05	6.71105e-05	4.12375e-06	6.00547e-05	6.21035e-05			21.1428	-7.2736	-6.87537	-6.65264
	2.05538	0.000305388	0.000309558	0.000284709	0.000274538	0.000237524	0.000265635	0.000243923	0.000220808	0.000314189	0.000284788	0.000302042	0.000297872	0.000284022	0.000277514	0.000243731	0.000306376	0.000287248	0.000270742	0.000279419	0.000257109		2.05538	4.78996e-05	2.07413e-05	2.97037e-05	4.58461e-05	5.02599e-05	4.47519e-05	3.16769e-05	0.00013202	0.000101298	6.7459e-05	-3.2998e-06	3.23094e-05	4.98284e-05	6.44922e-05	2.94686e-05	-8.49625e-06	3.74748e-05	1.34632e-06	4.28502e-05	5.52852e-05			21.1735	-7.34079	-7.25614	-6.93822
	2.06562	0.000298768	0.000313764	0.000273395	0.00024485	0.000265462	0.000267356	0.000263101	0.000241486	0.000280857	0.000229877	0.000283267	0.000280548	0.000278056	0.000285284	0.000232289	0.000286142	0.00030256	0.000241039	0.000276778	0.000243512		2.06562	2.32926e-05	-6.11849e-06	6.01256e-05	3.10285e-05	5.53998e-05	2.92428e-05	-1.33516e-06	6.84644e-05	6.47772e-05	6.93048e-05	6.1714e-06	5.20253e-05	6.18783e-05	0.000109495	3.23643e-06	-1.0041e-05	2.76619e-06	1.85255e-05	2.94175e-05	3.59043e-05			21.2042	-7.6137	-7.31597	-7.61674
	2.07586	0.000261547	0.000298615	0.000289999	0.00025634	0.000288217	0.000291414	0.000274623	0.000255622	0.000247636	0.000212678	0.000273564	0.000269347	0.000260463	0.000272968	0.000246089	0.000268611	0.000307527	0.0002514	0.000297563	0.000255048		2.07586	3.4953e-06	1.16774e-05	5.0677e-05	3.50654e-05	7.94519e-05	4.07264e-05	3.42777e-07	2.94728e-05	3.17777e-05	5.01396e-05	3.95851e-05	6.98743e-05	5.16888e-05	0.000118928	3.51554e-08	1.69162e-05	1.17159e-05	3.22518e-05	3.23422e-05	1.674e-05			21.2349	-7.80883	-7.05111	-8.02962
	2.0861	0.00024288	0.00027979	0.000305355	0.000274538	0.000278618	0.000306748	0.000266392	0.000245719	0.000251843	0.000249893	0.000275546	0.000271607	0.000245629	0.000280109	0.00028034	0.000287543	0.000305874	0.000297991	0.000303382	0.000273273		2.0861	1.733e-06	6.57704e-05	3.14816e-05	3.30072e-05	9.21164e-05	5.91429e-05	1.77266e-05	2.99482e-05	4.52172e-05	3.11555e-05	5.98351e-05	6.68031e-05	3.33415e-05	6.54784e-05	5.96239e-06	5.20919e-05	5.25078e-05	3.18694e-05	2.71963e-05	2.57354e-05			21.2657	-7.68121	-7.48389	-8.61611
	2.09634	0.000273064	0.000274074	0.000285974	0.000260472	0.000265585	0.000291903	0.000276623	0.000227713	0.000292795	0.000296483	0.000272418	0.000278949	0.000244838	0.000311639	0.00030713	0.000327455	0.000302958	0.000296801	0.000283423	0.000268655		2.09634	1.80346e-05	9.80431e-05	3.37054e-05	1.00142e-05	8.71495e-05	5.62397e-05	3.13007e-05	3.53164e-05	8.43413e-05	3.73601e-05	6.03468e-05	4.96037e-05	2.37756e-05	2.81568e-05	3.5681e-05	6.31323e-05	7.50422e-05	3.1108e-05	6.38799e-06	5.62921e-05			21.2964	-7.95491	-8.26717	-8.71493
	2.10658	0.000322451	0.000276466	0.000246497	0.000243858	0.000272346	0.000274187	0.000315702	0.000243037	0.000331562	0.000309543	0.000267519	0.000277841	0.000269882	0.000324213	0.000311051	0.000342153	0.000304289	0.000236957	0.000275397	0.000246485		2.10658	3.64002e-05	8.10824e-05	3.18718e-05	-8.28789e-07	8.964e-05	3.51481e-05	3.5076e-05	3.07893e-05	9.68612e-05	5.72216e-05	5.92587e-05	3.39596e-05	2.92833e-05	4.80847e-05	8.02384e-05	4.19179e-05	6.50076e-05	3.42499e-05	2.0693e-06	6.3408e-05			21.3271	-7.88156	-8.23584	-8.87129
	2.11682	0.000342077	0.000269765	0.000235277	0.000266272	0.000281594	0.000290357	0.000335204	0.000287211	0.000338306	0.000294993	0.000282329	0.000263574	0.000304027	0.000294342	0.000303572	0.000314743	0.000308808	0.000216517	0.0002942	0.000241215		2.11682	3.78275e-05	4.90553e-05	6.84699e-06	1.84906e-05	0.000102856	2.88165e-05	2.97499e-05	2.87717e-05	6.94321e-05	5.84431e-05	6.24412e-05	2.63801e-05	3.7135e-05	5.89409e-05	8.9371e-05	1.78945e-05	4.70211e-05	2.62988e-05	2.23345e-05	3.77616e-05			21.3578	-7.70705	-7.76264	-8.97356
	2.12706	0.000326065	0.000251483	0.000273296	0.000303993	0.000276345	0.000329069	0.000305025	0.00030501	0.000320408	0.000279162	0.000303966	0.000246731	0.000307053	0.000252739	0.00029114	0.000279997	0.000306949	0.000271067	0.000305691	0.000271284		2.12706	2.44654e-05	3.44041e-05	-4.57481e-07	3.08473e-05	9.53353e-05	5.39489e-05	2.52468e-05	3.06361e-05	3.65371e-05	3.82048e-05	6.28475e-05	2.82573e-05	3.16175e-05	2.15505e-05	5.22318e-05	2.30898e-05	3.29581e-05	6.98181e-06	2.92571e-05	2.93649e-05			21.3885	-7.68307	-7.39008	-9.56644
	2.1373	0.000307342	0.000242534	0.00031394	0.000304096	0.00026051	0.00034253	0.000271537	0.000273182	0.000306064	0.000266585	0.000298876	0.000244709	0.000270868	0.000247747	0.000269019	0.000276531	0.000284931	0.00031104	0.000288201	0.000306426		2.1373	2.17415e-05	2.56191e-05	3.42172e-05	1.87792e-05	6.47145e-05	7.99563e-05	3.24472e-05	2.86299e-05	2.91956e-05	2.38882e-05	6.00879e-05	4.05109e-05	2.19292e-05	-4.09212e-07	3.05106e-05	4.38433e-05	1.49857e-05	6.13735e-07	8.87051e-06	5.58546e-05			21.4193	-7.87204	-7.35612	-9.4578
	2.14754	0.000306493	0.000259637	0.000304449	0.000274768	0.000245216	0.000312878	0.00028134	0.000243396	0.000305122	0.000249877	0.000277224	0.000267384	0.000244329	0.000282358	0.000246117	0.000298869	0.000247811	0.000276543	0.000268995	0.000306007		2.14754	4.26181e-05	7.64255e-06	6.1355e-05	3.04943e-05	5.95099e-05	6.72709e-05	3.9538e-05	3.11946e-05	4.34424e-05	2.77861e-05	5.97601e-05	5.78944e-05	3.00135e-05	3.45283e-05	6.15258e-05	3.846e-05	4.93465e-07	1.76774e-05	1.74517e-06	6.20401e-05			21.45	-7.48691	-7.39565	-9.74943
	2.15778	0.000308896	0.000289589	0.000260128	0.000262079	0.000236079	0.000267452	0.00030942	0.000254175	0.000305786	0.000235527	0.000280021	0.000297057	0.000256849	0.000310883	0.000247104	0.000312468	0.000224394	0.000229175	0.000270185	0.000270467		2.15778	6.19939e-05	-2.52282e-06	4.44849e-05	8.7819e-05	9.03456e-05	3.02156e-05	2.58878e-05	4.65758e-05	5.97895e-05	3.4074e-05	6.27358e-05	6.80892e-05	4.42252e-05	6.74226e-05	9.78501e-05	1.16309e-05	6.41639e-06	3.65185e-05	3.49971e-05	2.24159e-05			21.4807	-7.16565	-7.52506	-10.1348
	2.16802	0.000296685	0.000305108	0.000244632	0.000275319	0.000243445	0.000244337	0.000302515	0.000276075	0.000294169	0.000239306	0.000301484	0.000306193	0.000274706	0.000296383	0.000267236	0.000307253	0.000241992	0.000230813	0.000276091	0.000244033		2.16802	5.27698e-05	1.5211e-05	3.11551e-05	0.000122384	9.30862e-05	2.68675e-05	2.87755e-06	6.24927e-05	6.6639e-05	3.19288e-05	6.36655e-05	6.34938e-05	3.03043e-05	4.9395e-05	8.73693e-05	1.9832e-05	2.92268e-05	3.6507e-05	7.87548e-05	9.40981e-08			21.5114	-7.14319	-7.75811	-9.76276
	2.17826	0.00027889	0.000301836	0.000266322	0.000282234	0.000270967	0.000259494	0.000264002	0.000275932	0.000275882	0.000258575	0.000299672	0.000297149	0.00026173	0.000262294	0.000273298	0.000301411	0.000284349	0.000251824	0.000273828	0.000252339		2.17826	3.26436e-05	5.24844e-05	6.29575e-05	7.37051e-05	3.92514e-05	7.6063e-05	3.08833e-06	6.58064e-05	6.20625e-05	2.86025e-05	5.60694e-05	4.77903e-05	-2.44175e-06	2.47349e-05	5.01764e-05	7.2353e-05	5.04666e-05	2.60169e-05	9.51763e-05	3.35761e-05			21.5421	-7.07617	-7.18519	-9.15937
	2.1885	0.000272829	0.000301356	0.000273364	0.000273641	0.000305456	0.000301876	0.000239741	0.000275888	0.000266144	0.000273481	0.000278214	0.000302727	0.000243727	0.000259183	0.000255429	0.000304604	0.000305216	0.000249384	0.000279315	0.000275736		2.1885	3.68551e-05	8.49438e-05	9.28326e-05	-5.54682e-06	-5.60332e-08	0.0001214	2.3901e-05	5.99522e-05	4.7621e-05	3.00078e-05	3.89856e-05	3.21086e-05	1.89273e-06	4.19378e-05	3.09152e-05	9.62785e-05	6.12259e-05	2.50845e-05	8.46594e-05	6.13286e-05			21.5729	-7.00746	-6.95007	-8.88854
	2.19874	0.000274774	0.000312149	0.00024955	0.000268319	0.000319393	0.000329315	0.00024961	0.000293718	0.000274211	0.000272675	0.000279733	0.000320682	0.000253751	0.000288026	0.000240665	0.000300874	0.00028096	0.0002429	0.000298262	0.000282273		2.19874	5.75106e-05	9.35801e-05	6.80101e-05	-1.9064e-05	2.63302e-05	0.0001006	2.8799e-05	4.71497e-05	3.10356e-05	3.17984e-05	2.28766e-05	2.58907e-05	5.51062e-05	7.26641e-05	3.17107e-05	5.0257e-05	5.60096e-05	3.88587e-05	6.75115e-05	3.25938e-05			21.6036	-6.6369	-7.53672	-9.17343
	2.20898	0.000272403	0.000312018	0.000246947	0.000275935	0.000303713	0.000306573	0.000268874	0.000305776	0.000291298	0.000272489	0.00030178	0.000308327	0.000276382	0.000292905	0.000241306	0.000279084	0.000243039	0.000261125	0.000305976	0.00027355		2.20898	5.73329e-05	7.28877e-05	2.59237e-05	4.03959e-05	6.21216e-05	3.25429e-05	9.32977e-06	2.62043e-05	2.36321e-05	3.09429e-05	2.39545e-05	3.00568e-05	9.30464e-05	7.23081e-05	3.20985e-05	1.90219e-06	2.93816e-05	5.64192e-05	5.66294e-05	-1.58828e-06			21.6343	-6.36416	-7.40066	-9.40475
	2.21922	0.000272165	0.000283316	0.000284102	0.000281021	0.00027879	0.000256102	0.000274889	0.000301577	0.000305336	0.00029355	0.000296259	0.000261568	0.000280397	0.000248711	0.000245825	0.000251331	0.000231257	0.00028881	0.000286858	0.000268585		2.21922	3.59883e-05	4.00144e-05	2.97898e-05	9.29228e-05	5.08848e-05	-2.31994e-06	1.26241e-07	1.56466e-05	3.08574e-05	2.95089e-05	4.42109e-05	3.51925e-05	6.89529e-05	4.95203e-05	2.9963e-05	1.89239e-05	-5.9501e-07	6.15734e-05	5.76404e-05	1.10473e-05			21.665	-6.23271	-7.22312	-9.62518
	2.22946	0.000280906	0.000249284	0.000304927	0.000271751	0.000275565	0.000244469	0.000273031	0.000308777	0.000308538	0.00033076	0.000256753	0.000243621	0.000273816	0.000210174	0.000258384	0.000243158	0.000245444	0.000302901	0.000258402	0.000276407		2.22946	3.01011e-05	2.77147e-05	6.97469e-05	8.68388e-05	2.96839e-05	3.15564e-05	1.85926e-05	4.00805e-05	4.63391e-05	3.00909e-05	6.14064e-05	3.10177e-05	2.60611e-05	3.36903e-05	3.04955e-05	5.91483e-05	1.86413e-06	4.34884e-05	6.66825e-05	3.15984e-05			21.6957	-6.34697	-6.96895	-10.0504
	2.2397	0.000280145	0.000245	0.000273234	0.00025306	0.000293	0.000282064	0.000276648	0.000320824	0.000304834	0.000351357	0.000234913	0.00027802	0.000273547	0.000235115	0.000290576	0.00026514	0.000251964	0.000306702	0.000244126	0.000291437		2.2397	5.26012e-05	4.48936e-05	9.39286e-05	5.01255e-05	3.41966e-05	7.46837e-05	3.31253e-05	8.16975e-05	6.22648e-05	3.84306e-05	4.977e-05	1.61159e-05	2.92872e-05	2.86923e-05	2.99617e-05	5.45335e-05	3.75715e-05	1.1441e-05	6.64341e-05	1.54284e-05			21.7265	-6.89676	-6.93902	-9.90924
	2.24994	0.000251468	0.000268473	0.000238877	0.000243518	0.000305953	0.00030493	0.000279162	0.000289261	0.000301782	0.000338304	0.000261169	0.000305209	0.000274122	0.000292016	0.000312641	0.000303123	0.000242827	0.000307008	0.000249268	0.000308025		2.24994	7.93906e-05	6.12048e-05	8.88208e-05	2.71576e-05	2.72879e-05	5.83583e-05	1.55767e-05	8.73076e-05	7.86445e-05	5.89416e-05	1.1995e-05	-1.31138e-07	6.89583e-05	2.83851e-05	2.91173e-05	3.11066e-05	6.23773e-05	-3.7351e-06	4.79849e-05	1.63859e-08			21.7572	-7.18494	-6.66081	-9.73966
	2.26018	0.000217844	0.000284339	0.000250863	0.000255756	0.00030454	0.000274424	0.000267083	0.000216422	0.000305756	0.000311893	0.000299689	0.000286845	0.000270288	0.000302353	0.000284142	0.000322746	0.000246782	0.000297399	0.000267927	0.000314007		2.26018	9.14307e-05	5.15257e-05	7.31934e-05	1.4822e-05	-2.52905e-06	7.28076e-06	-7.70593e-06	3.91108e-05	9.28949e-05	7.59857e-05	-1.76565e-05	-6.63093e-06	8.25517e-05	3.70843e-05	3.29679e-05	4.28879e-05	5.02044e-05	1.75275e-05	3.11779e-05	2.86804e-05			21.7879	-6.64183	-6.68693	-9.41746
	2.27042	0.000214624	0.000277383	0.000282504	0.000281306	0.000306195	0.000242804	0.000248127	0.000177925	0.000308943	0.000304879	0.000307898	0.000275108	0.000278201	0.000259035	0.000229	0.0003056	0.000282141	0.000279551	0.000284158	0.000299885		2.27042	8.74459e-05	3.27856e-05	5.57998e-05	-6.5371e-06	7.44054e-06	3.23337e-06	7.93683e-06	-1.53034e-05	8.77088e-05	6.29424e-05	-8.70451e-06	7.12375e-07	5.14801e-05	5.48949e-05	3.38566e-05	6.12849e-05	2.76488e-05	5.36517e-05	3.82532e-05	6.87869e-05			21.8186	-6.07635	-6.53973	-9.12013
	2.28066	0.000238891	0.000266836	0.000285786	0.000289308	0.000311897	0.000264029	0.000246175	0.000210331	0.000303854	0.000313119	0.000295942	0.000298742	0.000298185	0.000237029	0.000210225	0.000274513	0.000313584	0.000267921	0.000279478	0.000278245		2.28066	6.69406e-05	2.96529e-05	3.87017e-05	-1.678e-05	6.75497e-05	5.73006e-05	5.36034e-05	-2.12609e-05	5.50382e-05	2.37924e-05	3.0009e-05	1.60799e-05	2.34716e-05	6.81128e-05	2.53096e-05	3.52857e-05	2.45023e-05	6.46398e-05	5.7999e-05	7.31175e-05			21.8493	-6.27486	-6.4733	-8.94327
	2.2909	0.000259983	0.000272607	0.000268653	0.000262549	0.000299357	0.000311442	0.000265086	0.000261555	0.000298959	0.000305328	0.000301108	0.000302941	0.000303695	0.000282388	0.000233943	0.00027542	0.000296364	0.000271477	0.00026196	0.000277163		2.2909	3.84731e-05	3.16403e-05	2.70546e-05	1.42623e-05	8.9181e-05	9.33209e-05	7.16975e-05	1.78298e-05	2.47991e-05	2.41977e-08	5.93441e-05	3.22588e-05	3.99804e-05	6.5483e-05	2.43245e-05	-5.36359e-07	3.19184e-05	4.01236e-05	5.94637e-05	5.70901e-05			21.8801	-6.00807	-5.88668	-8.78603
	2.30114	0.000272528	0.000282929	0.000265813	0.000223872	0.000264891	0.000324144	0.000281218	0.000278236	0.000307601	0.000271053	0.000318511	0.000261364	0.000285143	0.000344139	0.000249949	0.000311499	0.000241967	0.000285479	0.000268231	0.000296356		2.30114	2.91906e-05	1.71559e-05	1.33022e-05	5.69877e-05	3.61116e-05	6.62307e-05	3.85443e-05	5.39649e-05	3.69408e-05	1.27999e-05	5.45904e-05	4.81758e-05	7.95598e-05	4.93309e-05	4.45868e-05	1.6715e-05	3.15966e-05	7.54366e-06	3.65855e-05	5.62635e-05			21.9108	-5.57754	-5.77277	-8.54111
	2.31138	0.000289264	0.000276634	0.000282029	0.000215763	0.00023902	0.000298597	0.000278668	0.000269192	0.000314113	0.000243605	0.000310111	0.000246461	0.000273612	0.000347385	0.000244158	0.00033596	0.000209564	0.000302097	0.000299633	0.000304901		2.31138	4.76661e-05	3.60125e-07	-8.9214e-06	5.26036e-05	-4.62835e-06	2.44046e-05	1.9397e-06	6.171e-05	7.78907e-05	3.08915e-05	3.31377e-05	6.31509e-05	8.99017e-05	3.28766e-05	6.20865e-05	6.43079e-05	3.18807e-05	-2.21794e-06	1.80572e-05	6.15759e-05			21.9415	-5.34814	-5.21758	-8.34869
	2.32162	0.000304601	0.000255136	0.000298924	0.000248447	0.00023775	0.000275171	0.000269664	0.000254491	0.000300027	0.000249716	0.000277254	0.000296648	0.000290397	0.000292471	0.00025416	0.000312885	0.000224128	0.000310915	0.0003085	0.0002879		2.32162	6.15096e-05	1.49919e-05	-1.46098e-05	1.17302e-05	2.76889e-05	2.05165e-05	1.28721e-05	5.98109e-05	8.96781e-05	2.04089e-05	3.11875e-05	6.79479e-05	5.67407e-05	3.28844e-05	5.05611e-05	6.92037e-05	4.70476e-05	1.86251e-05	2.69177e-05	4.60081e-05			21.9722	-4.58703	-4.49059	-8.36836
	2.33186	0.000297813	0.000244052	0.000308056	0.000290418	0.000247462	0.000277093	0.00027143	0.000231902	0.000289493	0.000277014	0.00027198	0.000338757	0.00030998	0.000247439	0.000292777	0.000269881	0.000250664	0.000306755	0.000280335	0.000268823		2.33186	4.69822e-05	5.84825e-05	1.87051e-05	4.06175e-06	7.11259e-05	3.18489e-05	5.1995e-05	6.20715e-05	5.4722e-05	-1.2494e-06	5.74659e-05	5.89388e-05	1.84723e-05	5.48417e-05	3.15718e-05	2.40034e-05	6.62953e-05	5.53034e-05	4.40841e-05	2.43284e-05			22.0029	-3.99504	-3.33246	-8.33509
	2.3421	0.0002758	0.000254631	0.000308785	0.000307762	0.000260652	0.000293512	0.000279453	0.000212682	0.000316455	0.000296953	0.000302193	0.000311571	0.000296068	0.000250399	0.00032076	0.000255342	0.000252443	0.000298521	0.000271843	0.000268757		2.3421	3.07756e-05	8.36599e-05	5.69874e-05	4.29158e-05	5.75261e-05	1.67922e-05	6.2591e-05	4.73801e-05	2.72475e-05	3.52642e-06	7.86589e-05	5.31062e-05	1.53157e-05	7.69992e-05	3.92209e-05	-1.05898e-05	6.85029e-05	7.87824e-05	3.43484e-05	3.6973e-05			22.0337	-2.99787	-2.6287	-7.41949
	2.35234	0.000264927	0.000274332	0.000298523	0.000298229	0.000284967	0.000308656	0.000278198	0.000224412	0.000346215	0.000305965	0.000307214	0.000266308	0.00025725	0.000272188	0.000311812	0.000280839	0.00023945	0.000303485	0.000303365	0.0002784		2.35234	4.21947e-05	6.19687e-05	5.42684e-05	6.62549e-05	1.5274e-05	-2.90009e-06	3.79973e-05	8.97975e-06	5.4689e-05	3.53704e-05	6.37026e-05	6.54092e-05	4.67313e-05	6.72726e-05	5.91853e-05	6.54662e-06	5.68221e-05	6.55379e-05	4.67506e-06	8.14499e-05			22.0644	-2.40501	-2.06354	-6.93808
	2.36258	0.000274531	0.000289854	0.000281186	0.000280706	0.00030576	0.000311715	0.000262858	0.000261159	0.000318639	0.000309262	0.000263548	0.000262612	0.000237362	0.000275913	0.000286756	0.000317709	0.000237629	0.000315873	0.000308183	0.000279207		2.36258	6.11813e-05	2.79361e-05	3.19451e-05	4.49318e-05	-2.29297e-06	2.23679e-05	2.7172e-05	-8.81008e-06	0.000110026	6.13783e-05	3.13864e-05	7.48299e-05	8.18668e-05	2.7247e-05	5.52961e-05	5.77712e-05	5.45158e-05	2.60902e-05	-1.35623e-06	0.000102848			22.0951	-1.8768	-1.23765	-5.81103
	2.37282	0.00028302	0.000305617	0.0002701	0.000270815	0.000297521	0.00029907	0.000246349	0.000284459	0.000258698	0.000302891	0.000243624	0.000277714	0.00025841	0.000273771	0.000274984	0.000337516	0.000249974	0.000307494	0.000251513	0.000267645		2.37282	5.38425e-05	3.13106e-05	3.91818e-05	2.16931e-05	4.02024e-06	8.16265e-05	5.28018e-05	2.43363e-05	0.00013314	5.83597e-05	2.99678e-05	5.03757e-05	9.37839e-05	2.93958e-07	3.41591e-05	9.74871e-05	6.69951e-05	4.92924e-07	2.18454e-05	7.1827e-05			22.1258	-0.850801	-0.272201	-4.76153
	2.38306	0.000274004	0.000315328	0.000271906	0.000271926	0.000275548	0.000279953	0.00024583	0.000279909	0.0002491	0.000285524	0.000291192	0.000275806	0.000294181	0.000287496	0.000275525	0.000327145	0.000265482	0.000263531	0.000213456	0.000250368		2.38306	2.98764e-05	5.95882e-05	6.06967e-05	2.58192e-05	1.80004e-05	0.000108282	7.17834e-05	6.08356e-05	0.000109129	2.84653e-05	6.61375e-05	8.96057e-06	7.62115e-05	1.8049e-05	2.63948e-05	9.17894e-05	7.00788e-05	9.58008e-06	3.09603e-05	3.38256e-05			22.1565	-0.041086	0.607541	-4.40269
	2.3933	0.000253657	0.000303412	0.000277018	0.000277373	0.000283792	0.000275617	0.000267838	0.000264854	0.000289985	0.000272704	0.000335877	0.000277473	0.000309731	0.000304404	0.000275157	0.000296097	0.00028283	0.000214767	0.000253301	0.000241572		2.3933	2.1537e-05	5.9761e-05	5.10512e-05	3.3337e-05	4.64532e-05	7.13304e-05	4.22214e-05	4.36229e-05	7.31195e-05	-6.94872e-06	9.19783e-05	5.69155e-06	4.42681e-05	5.82277e-05	3.04258e-05	4.82667e-05	4.994e-05	3.01551e-05	1.82675e-05	3.90372e-05			22.1873	0.91827	1.32727	-3.84546
	2.40354	0.000244099	0.000278424	0.000275643	0.000276959	0.000321503	0.000293218	0.000295802	0.000249432	0.000304597	0.000271491	0.000303031	0.000297421	0.000306286	0.000304831	0.000271893	0.000273421	0.000300434	0.000205903	0.000305304	0.000259137		2.40354	3.16176e-05	3.20433e-05	3.01225e-05	3.0164e-05	8.20592e-05	1.57095e-05	-5.1761e-06	4.31867e-06	5.76338e-05	-1.67097e-05	7.16916e-05	5.57745e-05	2.72966e-05	7.55365e-05	2.79426e-05	1.8429e-05	3.10081e-05	3.4342e-05	3.07904e-05	6.1067e-05			22.218	1.80225	2.39698	-2.71689
	2.41378	0.000255392	0.00027609	0.000275789	0.00027021	0.000340187	0.000309687	0.000306048	0.000234288	0.000280615	0.000276199	0.000241233	0.000303239	0.000306088	0.000304872	0.000273926	0.000278258	0.000304041	0.000244807	0.000296384	0.000296204		2.41378	3.74062e-05	3.36255e-05	4.36814e-05	3.73022e-05	9.29526e-05	-1.05242e-06	-6.19212e-06	1.20923e-05	6.03845e-05	9.35954e-06	2.80042e-05	0.000107889	4.49748e-05	6.2108e-05	2.91059e-05	4.50459e-05	3.49879e-05	3.06436e-05	6.70689e-05	5.05871e-05			22.2487	2.86246	3.42272	-1.71948
	2.42402	0.000277134	0.000296696	0.000294774	0.000270727	0.000319122	0.000294398	0.000293003	0.000237444	0.000279544	0.000288799	0.00023566	0.000281645	0.000308417	0.000313897	0.000278774	0.00028506	0.000285662	0.000289726	0.000274588	0.000311601		2.42402	2.88878e-05	7.39607e-05	6.40262e-05	5.69348e-05	7.25702e-05	1.97277e-05	3.91075e-05	5.41363e-05	5.82127e-05	3.49713e-05	1.50471e-06	0.000110895	8.14842e-05	4.96702e-05	4.76942e-05	0.000101941	3.81405e-05	4.06279e-05	5.91682e-05	2.96164e-05			22.2794	3.58989	4.26867	-0.881281
	2.43426	0.000285143	0.000304535	0.000327095	0.000285501	0.000288962	0.000254472	0.00027608	0.000269681	0.000303661	0.000313054	0.000279755	0.000279775	0.0002911	0.000305109	0.000275565	0.000263735	0.000263964	0.000305196	0.000302357	0.000282678		2.43426	1.30229e-05	9.06482e-05	3.81089e-05	6.01082e-05	4.89313e-05	3.52328e-05	6.26184e-05	5.65e-05	3.99241e-05	2.25969e-05	7.77296e-07	7.35467e-05	9.7483e-05	6.13322e-05	6.13629e-05	0.00012309	1.51159e-05	6.26177e-05	5.753e-06	4.43798e-05			22.3101	4.44629	5.37819	-0.128138
	2.4445	0.000270795	0.000296415	0.000339766	0.000302267	0.000276002	0.000235881	0.000270913	0.000302209	0.000291968	0.000321704	0.000307477	0.000330859	0.000255043	0.000266192	0.000259111	0.000239241	0.000265967	0.000300528	0.000336877	0.000247789		2.4445	-2.46192e-06	5.66877e-05	9.283e-07	3.85888e-05	3.55945e-05	3.10362e-05	3.19369e-05	1.03175e-05	2.55441e-05	-2.72431e-06	1.33392e-05	3.89936e-05	7.46246e-05	8.38243e-05	4.77069e-05	8.95036e-05	-4.09288e-06	8.17931e-05	4.19069e-06	6.47254e-05			22.3409	5.05275	6.05848	0.718945
	2.45474	0.000249568	0.000310974	0.000308787	0.00030673	0.000272975	0.000263346	0.000274399	0.000298707	0.000251312	0.000288335	0.000303296	0.000390672	0.000230661	0.000244217	0.00024438	0.000256814	0.000290656	0.00030647	0.000313423	0.000250456		2.45474	-9.11163e-06	2.81897e-05	2.41326e-05	1.49398e-05	2.01546e-05	3.77163e-05	4.71732e-07	-1.36661e-05	4.41135e-05	1.04274e-05	3.44487e-05	2.80667e-05	3.3369e-05	9.17322e-05	3.07898e-05	4.53133e-05	1.90789e-05	9.25135e-05	8.02498e-05	3.67614e-05			22.3716	5.84755	7.21123	1.36058
	2.46498	0.000244963	0.000339721	0.000255043	0.000304973	0.000272745	0.000299905	0.000274445	0.000276574	0.000252262	0.000246169	0.00028982	0.000390496	0.000237782	0.000271204	0.000249182	0.000296325	0.000306974	0.000316641	0.000270369	0.000272116		2.46498	5.3243e-06	4.40763e-05	8.32879e-05	2.11663e-06	2.77829e-06	7.40248e-05	2.02192e-05	2.09518e-05	8.53824e-05	5.00915e-05	5.70326e-05	2.97418e-05	4.21247e-06	7.8389e-05	4.13565e-05	2.86252e-05	5.61893e-05	8.71043e-05	0.000121986	-5.10705e-07			22.4023	6.39603	8.719	2.10036
	2.47522	0.00025943	0.000325901	0.000218863	0.000307136	0.000282314	0.000299514	0.000274503	0.000284089	0.000294183	0.000256279	0.000268954	0.000330538	0.000260817	0.000307177	0.000274983	0.000301181	0.000290231	0.000300244	0.0002752	0.000268043		2.47522	3.85933e-05	6.32047e-05	9.09144e-05	-4.69202e-06	2.43993e-06	0.000109436	6.02943e-05	6.47668e-05	9.98285e-05	5.89966e-05	5.88345e-05	3.08421e-05	-4.07163e-06	5.98045e-05	6.13792e-05	3.5551e-05	5.52321e-05	5.47054e-05	6.21704e-05	3.17076e-05			22.433	6.71959	11.2076	3.12437
	2.48546	0.000279837	0.000269417	0.000212934	0.000306869	0.000300548	0.000277821	0.000284974	0.000329008	0.000306121	0.00031166	0.000234146	0.000279665	0.000274362	0.000301635	0.000299634	0.00027821	0.000253682	0.000260286	0.000311186	0.00024679		2.48546	6.68345e-05	4.68647e-05	4.0239e-05	-2.39137e-06	2.31202e-05	0.000104413	6.14923e-05	6.46305e-05	6.72273e-05	3.57947e-05	2.80118e-05	3.05479e-05	-1.30701e-06	5.40235e-05	5.4862e-05	5.19141e-05	3.27732e-05	1.22584e-05	-8.5059e-06	0.000109171			22.4638	7.29242	15.3143	4.03841
	2.4957	0.000296093	0.00024193	0.000215576	0.000292433	0.000311115	0.000279826	0.000305368	0.000361188	0.000280561	0.000343403	0.000210415	0.000281812	0.000267409	0.000270133	0.000304821	0.000280746	0.000231824	0.000244856	0.000319093	0.000247776		2.4957	6.99982e-05	2.77218e-05	7.01401e-06	1.38391e-05	4.73727e-05	6.57134e-05	3.03533e-05	3.66319e-05	3.29985e-05	3.71934e-05	-6.1941e-06	3.06534e-05	6.28268e-06	6.28656e-05	2.93171e-05	6.91678e-05	3.93158e-05	1.8008e-06	-1.25117e-06	0.00013132			22.4945	7.84339	21.3179	5.21522
	2.50594	0.000308463	0.000263107	0.000213733	0.000275805	0.000307532	0.000301315	0.000315501	0.00034013	0.000276156	0.000322763	0.000221699	0.000303487	0.000247886	0.000249166	0.000290275	0.000303579	0.000239567	0.000274637	0.000300511	0.000270806		2.50594	5.68589e-05	4.35259e-05	2.5926e-05	2.94792e-05	6.04938e-05	3.46551e-05	1.71186e-05	2.95015e-05	4.01583e-05	7.55509e-05	3.39475e-07	3.02243e-05	2.51052e-05	6.89452e-05	2.00098e-05	6.96942e-05	6.06239e-05	3.31746e-05	3.77849e-05	7.51429e-05			22.5252	8.63703	29.1659	7.38729
	2.51618	0.000312246	0.000273376	0.000218441	0.000279216	0.000294773	0.000301358	0.000304061	0.000283481	0.000300428	0.000289702	0.000253494	0.000296584	0.000233477	0.000243795	0.000273221	0.000293297	0.000253478	0.000312102	0.000295457	0.000280837		2.51618	5.28204e-05	6.68037e-05	5.63404e-05	3.05695e-05	5.65549e-05	2.97183e-05	3.16171e-05	5.00297e-05	6.10355e-05	9.77612e-05	4.51205e-05	3.40633e-05	5.88092e-05	5.78784e-05	3.21244e-05	4.67396e-05	4.51789e-05	6.76122e-05	3.96973e-05	1.40831e-05			22.5559	10.6234	39.1401	10.3715
	2.52642	0.000296457	0.000250853	0.000241508	0.000302493	0.000277926	0.000279642	0.00028397	0.000244855	0.000302939	0.000276324	0.00027352	0.000276192	0.000241191	0.000252005	0.000268049	0.000254194	0.000247638	0.000317099	0.000309226	0.000275077		2.52642	6.89236e-05	5.27776e-05	6.19416e-05	2.98814e-05	3.55509e-05	3.16597e-05	3.978e-05	6.14623e-05	4.49023e-05	7.63624e-05	7.20316e-05	5.20729e-05	8.96936e-05	3.83979e-05	3.86679e-05	2.9435e-05	5.55048e-06	7.27647e-05	3.02484e-05	-9.8324e-07			22.5866	13.5962	48.7866	14.1238
	2.53666	0.000262099	0.000248861	0.000267868	0.000316688	0.000264167	0.000269287	0.000273971	0.000249052	0.000279224	0.000272347	0.000271665	0.000282288	0.000263698	0.000283598	0.000276119	0.000242989	0.00023234	0.000299116	0.000313358	0.000280645		2.53666	8.91192e-05	1.73107e-05	4.91575e-05	4.32611e-05	1.53201e-05	2.58013e-05	2.92549e-05	4.54868e-05	5.67915e-06	4.59291e-05	4.91856e-05	8.01505e-05	8.45955e-05	3.00443e-05	2.86198e-05	3.79997e-05	-1.31479e-06	5.43017e-05	4.82825e-05	1.18526e-05			22.6174	17.7385	55.6434	20.1461
	2.5469	0.00023734	0.000285885	0.00027495	0.000306378	0.000271201	0.00027397	0.000264059	0.000274712	0.000269162	0.000271252	0.000255483	0.00030294	0.000274938	0.000312309	0.000281548	0.000266794	0.000240014	0.000282877	0.000298816	0.000303069		2.5469	8.71263e-05	1.36533e-05	3.14458e-05	6.05088e-05	2.58508e-05	2.73394e-05	2.29207e-05	3.06302e-05	3.00816e-06	3.36404e-05	2.25249e-05	9.3942e-05	3.63721e-05	3.18996e-05	2.14814e-05	3.91874e-05	2.62582e-05	2.38187e-05	6.23764e-05	2.88429e-05			22.6481	23.3533	59.617	28.001
	2.55714	0.00025196	0.000312554	0.000258966	0.000292006	0.000302744	0.000272485	0.000239877	0.000285409	0.000274766	0.000284486	0.00023773	0.000298398	0.000261963	0.00029488	0.000271171	0.000279425	0.000267427	0.000269584	0.000280761	0.000314806		2.55714	5.42961e-05	4.80933e-05	1.14641e-05	6.46164e-05	6.62711e-05	4.68537e-05	3.25358e-05	4.27454e-05	5.06517e-05	2.29514e-05	4.58644e-05	7.4887e-05	-1.05512e-05	2.8956e-05	3.47106e-05	7.22539e-06	4.02543e-05	-1.11688e-05	4.36971e-05	4.8404e-05			22.6788	31.2459	60.2724	37.3454
	2.56738	0.000294524	0.000307987	0.000244124	0.000304671	0.000333971	0.000272667	0.000223504	0.000273752	0.00026389	0.000302977	0.000234509	0.000277649	0.000244702	0.000251802	0.000251333	0.000274087	0.000276056	0.000252576	0.0002729	0.000305862		2.56738	1.28072e-05	6.8336e-05	-8.49828e-09	6.13004e-05	9.189e-05	6.14411e-05	3.93211e-05	6.17413e-05	9.63114e-05	4.28318e-06	8.78693e-05	3.80706e-05	-2.16068e-06	2.49013e-05	5.65603e-05	-8.8198e-06	3.15564e-05	-2.05503e-05	2.85671e-05	6.11556e-05			22.7095	40.1844	58.381	45.9431
	2.57762	0.000314201	0.000306351	0.000251566	0.000333279	0.000334141	0.000289313	0.000254035	0.000254909	0.000245204	0.00029924	0.000256561	0.00027336	0.000240788	0.000250095	0.000244306	0.000284222	0.000254538	0.000240685	0.000274003	0.000296799		2.57762	-4.27659e-06	4.65897e-05	9.853e-06	6.23527e-05	7.07097e-05	4.97046e-05	2.67439e-05	5.4456e-05	9.55461e-05	7.57e-07	8.14191e-05	1.80758e-05	5.39834e-05	3.63518e-05	5.87422e-05	4.29144e-05	3.41536e-05	2.1858e-05	4.71278e-05	5.18648e-05			22.7402	48.4212	54.2801	52.2718
	2.58786	0.000285654	0.000311145	0.00027583	0.000335076	0.000306857	0.00030463	0.000313438	0.000243368	0.000250524	0.00027865	0.000291118	0.000276139	0.000244145	0.00028884	0.000258015	0.000304132	0.000243575	0.000240444	0.000272588	0.000305142		2.58786	9.86215e-06	2.60411e-05	3.16165e-05	6.10671e-05	3.20516e-05	3.15689e-05	5.9578e-06	2.83029e-05	6.11924e-05	2.26569e-05	4.06363e-05	2.72581e-05	9.18615e-05	5.57046e-05	2.88626e-05	0.000113648	5.91411e-05	7.92873e-05	6.57424e-05	3.06991e-05			22.771	54.2777	49.2478	55.6124
[truncated: 2,677 more rows]
[truncated: 17 more columns]

## Sheet: panel B
		Isolated clicks		Rustling stimulus (atten. 50 dB)		Rustling stimulus (atten. 20 dB)		Rustling stimulus (atten. 35 dB)
[truncated: 41 more rows]
