# Supplementary material for: Glycinergic axonal inhibition subserves acute spatial sensitivity to sudden increases in sound intensity
Source: eLife journal article supplement (doi:10.7554/elife.62183), 2021-06-14
Supplement: supp [file elife-62183-supp-v1.zip › elife_poa_e62183_Figure_1_source_data_1.xlsx]

## Sheet: panel A
	Principal LSO cell
	ITD (ms)	Spikes/click
		mean	s.e.m.			ITD (ms)	Spikes/click
	-2	1	0		80% of maximum:	-0.42	0.88
	-1.95	1	0			0.229	0.874
	-1.9	1	0		20% of maximum:	-0.337	0.222
	-1.85	1	0			0.069	0.214
	-1.8	1	0
	-1.75	1	0		ITDs halfwidth:	-0.375
	-1.7	1	0			0.124
	-1.65	1	0
	-1.6	1	0
	-1.55	1	0
	-1.5	1	0
	-1.45	1	0
	-1.4	1.1	0.1
	-1.35	1	0
	-1.3	1	0
	-1.25	1	0
	-1.2	1	0
	-1.15	1	0
	-1.1	1	0
	-1.05	1	0
	-1	1	0
	-0.95	1	0
	-0.9	1	0
	-0.85	1	0
	-0.8	1	0
	-0.75	1	0
	-0.7	1	0
	-0.65	1	0
	-0.6	1	0
	-0.55	1	0
	-0.5	1	0
	-0.45	1	0
	-0.4	0.8	0.1333
	-0.35	0.3	0.1528
	-0.3	0	0
	-0.25	0	0
	-0.2	0	0
	-0.15	0	0
	-0.1	0	0
	-0.05	0	0
	0	0	0
	0.05	0.1	0.1
	0.1	0.4	0.1633
	0.15	0.7	0.1528
	0.2	0.7	0.1528
	0.25	1	0
	0.3	1	0
	0.35	0.9	0.1
	0.4	1	0
	0.45	1	0
	0.5	1	0
	0.55	1	0
	0.6	1	0
	0.65	1	0
	0.7	1	0
	0.75	1	0
	0.8	1	0
	0.85	1	0
	0.9	1	0
	0.95	1	0
	1	1	0

## Sheet: panel B
	ITD (ms):	-1.95	-1.9	-1.85	-1.8	-1.75	-1.7	-1.65	-1.6	-1.55	-1.5	-1.45	-1.4	-1.35	-1.3	-1.25	-1.2	-1.15	-1.1	-1.05	-1	-0.95	-0.9	-0.85	-0.8	-0.75	-0.7	-0.65	-0.6	-0.55	-0.5	-0.45	-0.4	-0.35	-0.3	-0.25	-0.2	-0.15	-0.1	-0.0500003	-2.98023e-07	0.0499997	0.0999997	0.15	0.2	0.25	0.3	0.35	0.4
	Time (ms)	Vm rel (mV)	Vm rel (mV)	Vm rel (mV)	Vm rel (mV)	Vm rel (mV)	Vm rel (mV)	Vm rel (mV)	Vm rel (mV)	Vm rel (mV)	Vm rel (mV)	Vm rel (mV)	Vm rel (mV)	Vm rel (mV)	Vm rel (mV)	Vm rel (mV)	Vm rel (mV)	Vm rel (mV)	Vm rel (mV)	Vm rel (mV)	Vm rel (mV)	Vm rel (mV)	Vm rel (mV)	Vm rel (mV)	Vm rel (mV)	Vm rel (mV)	Vm rel (mV)	Vm rel (mV)	Vm rel (mV)	Vm rel (mV)	Vm rel (mV)	Vm rel (mV)	Vm rel (mV)	Vm rel (mV)	Vm rel (mV)	Vm rel (mV)	Vm rel (mV)	Vm rel (mV)	Vm rel (mV)	Vm rel (mV)	Vm rel (mV)	Vm rel (mV)	Vm rel (mV)	Vm rel (mV)	Vm rel (mV)	Vm rel (mV)	Vm rel (mV)	Vm rel (mV)	Vm rel (mV)
	4.001	-0.76604	0.348293	-0.970321	1.05653	-0.324637	-0.0761497	-0.709242	-0.486443	0.69652	-0.417864	0.444151	0.437386	0.0556969	-0.405217	1.04559	-0.370026	-0.439216	0.883014	-0.052678	-0.909874	-0.357849	0.71174	-0.0618053	-0.291212	0.4241	-0.710335	0.409749	-0.226486	0.0541519	0.0229736	-0.881252	0.45465	0.463056	0.710329	-0.225475	-0.464746	0.969152	0.670003	-0.67266	0.0241443	-0.272884	0.32606	0.192054	0.306125	-0.147604	0.328338	0.759118	-0.014748
	4.0624	-0.822948	0.431331	-0.916609	0.962557	-0.39809	-0.0485226	-0.778109	-0.47504	0.623009	-0.457253	0.428712	0.193835	-0.0535412	-0.350319	0.863718	-0.166905	-0.597549	0.824728	0.00481335	-0.912092	-0.254536	0.736874	-0.0227677	-0.151152	0.470343	-0.867785	0.357053	-0.189464	0.0258865	0.137008	-0.859675	0.536344	0.35874	0.600106	-0.0179794	-0.451248	0.946712	0.667409	-0.659644	0.121143	-0.337233	0.273023	-0.0185795	0.33761	-0.164719	0.353444	0.725205	0.0579319
	4.1239	-0.829015	0.366029	-0.781781	0.919473	-0.387477	0.114938	-0.697468	-0.492009	0.602582	-0.605156	0.464179	0.0516834	-0.099234	-0.328377	0.800532	-0.055011	-0.575215	0.826565	0.0772606	-0.768328	-0.125541	0.600741	0.0101567	0.028915	0.664455	-0.845603	0.410632	-0.222206	0.0988273	0.140522	-0.91004	0.618831	0.416001	0.761829	0.0460198	-0.461518	0.883207	0.627476	-0.513746	0.263096	-0.349069	0.278439	-0.0584438	0.211469	0.0445087	0.463048	0.89787	0.0388485
	4.1853	-0.773665	0.341293	-0.767727	0.911394	-0.538177	0.0445618	-0.669581	-0.488047	0.531674	-0.666585	0.310291	-0.153131	-0.128619	-0.457137	0.773172	0.0511074	-0.625683	0.920496	0.199122	-0.76626	0.0298245	0.632474	0.0676609	0.124535	0.843689	-0.896039	0.370212	-0.219318	0.00325279	0.226584	-0.796825	0.545882	0.432409	0.829751	0.194877	-0.462187	0.80765	0.651229	-0.347327	0.389907	-0.226258	0.334323	-0.0105797	0.293372	0.0322811	0.495969	0.83875	-0.0253471
	4.2467	-0.708479	0.382085	-0.716339	0.829419	-0.441242	0.0512947	-0.553206	-0.401286	0.414305	-0.750528	0.376551	-0.232181	-0.163646	-0.441018	0.736217	0.102425	-0.655235	0.918909	0.214318	-0.571589	0.211444	0.583125	0.0607468	0.293702	0.88304	-0.860174	0.378901	-0.26992	0.000184609	0.262574	-0.881249	0.567363	0.316207	0.856794	0.19314	-0.279042	0.82787	0.567699	-0.270886	0.408495	-0.149586	0.286179	-0.107906	0.377154	0.199135	0.654759	0.853679	-0.0213756
	4.3082	-0.743042	0.227305	-0.562957	0.835976	-0.637323	0.221083	-0.514299	-0.244538	0.346626	-0.908359	0.61454	-0.426522	-0.326377	-0.45391	0.665999	0.383303	-0.622908	1.02715	0.173521	-0.45023	0.246416	0.575798	-0.0205784	0.441384	1.1483	-0.897239	0.439833	-0.210608	-0.19122	0.364946	-0.559378	0.59576	0.297747	0.956368	0.328887	-0.269368	0.753955	0.559983	-0.177826	0.636591	0.0561794	0.27624	-0.178147	0.343061	0.337825	0.77981	0.890158	-0.111472
	4.3696	-0.645673	0.156326	-0.729774	0.865571	-0.600168	0.365012	-0.416064	-0.141093	0.198868	-0.930631	0.755539	-0.408336	-0.121592	-0.588757	0.806142	0.367516	-0.475817	1.01801	0.297725	-0.508648	0.428365	0.480649	0.0978874	0.571995	1.24567	-0.790223	0.543227	-0.145541	-0.207483	0.455156	-0.655527	0.664566	0.314086	0.950566	0.342047	-0.0266121	0.598047	0.488057	-0.0111275	0.713543	0.133774	0.370088	-0.0327835	0.463327	0.506789	0.72423	0.798067	-0.197527
	4.4311	-0.564872	0.120628	-0.584957	0.93498	-0.600561	0.490235	-0.371694	-0.0636349	0.0718079	-0.804638	0.938171	-0.554915	-0.154865	-0.476879	0.744401	0.529536	-0.396636	1.11347	0.17769	-0.389971	0.623669	0.615359	0.170781	0.536935	1.26563	-0.798479	0.628882	-0.135052	-0.312713	0.500655	-0.711496	0.701052	0.483524	0.867103	0.43639	0.143103	0.614045	0.311092	0.269981	0.820856	0.256185	0.381868	0.153225	0.454784	0.651866	0.577937	0.630941	-0.314319
	4.4925	-0.56515	0.0582257	-0.75266	1.17332	-0.655822	0.555149	-0.272266	0.015149	-0.0305053	-0.873312	0.898357	-0.415715	-0.0517597	-0.672125	0.857977	0.650098	-0.287658	1.02559	0.129268	-0.295707	0.609109	0.618031	0.235628	0.542788	1.45947	-0.726771	0.445385	-0.0705338	-0.407942	0.506258	-0.520318	0.518308	0.475347	0.924273	0.52437	0.319139	0.609725	0.30437	0.449943	0.914201	0.301931	0.414138	0.122502	0.495162	0.84114	0.482674	0.469887	-0.348188
	4.5539	-0.400455	-0.159654	-0.631257	1.31415	-0.806866	0.540553	-0.205362	0.0360195	-0.0966187	-0.936762	1.09791	-0.524033	-0.136026	-0.818965	0.876526	0.668379	-0.23253	1.0527	0.0561981	-0.393707	0.644934	0.731427	0.175745	0.372245	1.53128	-0.632737	0.410567	-0.0330929	-0.453318	0.492559	-0.559451	0.593147	0.568467	0.889698	0.447926	0.493846	0.593154	0.24935	0.672342	1.00476	0.39255	0.464821	0.108218	0.369714	0.909141	0.431401	0.279227	-0.322171
	4.6154	-0.472086	-0.244794	-0.782808	1.38129	-0.873547	0.495489	0.0196053	0.0750069	-0.115985	-0.805398	1.1636	-0.594744	-0.0880871	-0.804828	0.880491	0.672285	-0.215874	0.975071	0.113309	-0.401871	0.539753	0.580164	0.175375	0.398854	1.47055	-0.58984	0.365986	0.118196	-0.492168	0.427781	-0.475666	0.677752	0.619928	0.823965	0.732952	0.494345	0.711344	0.229292	0.733716	0.910965	0.399535	0.392314	0.0697182	0.301627	1.00466	0.230048	0.0529018	-0.253047
	4.6768	-0.461839	-0.215256	-0.723518	1.32508	-0.904686	0.510964	-0.0255284	0.080545	-0.204508	-0.785213	1.24282	-0.466278	-0.136981	-1.00068	0.952154	0.548225	-0.0406528	0.949971	0.071669	-0.41577	0.514632	0.59651	0.162144	0.24786	1.42035	-0.576637	0.393263	0.120238	-0.521314	0.598169	-0.319086	0.606879	0.559386	0.721703	0.670633	0.700598	0.717418	0.234151	0.95228	0.877968	0.350907	0.338348	0.00460053	0.0630333	1.07614	0.0928272	-0.0968697	-0.228233
	4.7383	-0.434558	-0.265795	-0.766656	1.32859	-0.981034	0.501893	0.0175449	0.0276878	-0.0269341	-0.64004	1.24846	-0.384732	-0.122606	-1.07801	1.07929	0.570903	-0.0164444	0.675996	-0.0477375	-0.369059	0.421727	0.483521	0.0846992	0.072488	1.29805	-0.530313	0.242155	0.232775	-0.450673	0.523104	-0.250679	0.713858	0.670444	0.739325	0.833309	0.881932	0.761501	0.104234	1.01749	0.807067	0.222625	0.239753	-0.124351	0.0560028	1.22373	0.144421	-0.357991	-0.308039
	4.7997	-0.363377	-0.161209	-0.68331	1.346	-0.963484	0.348255	-0.00871085	-0.0582615	-0.245861	-0.476002	1.22184	-0.470138	-0.224848	-1.13814	1.15904	0.554449	-0.0252873	0.622299	-0.00380745	-0.310075	0.227594	0.327674	0.140486	0.0734089	1.09689	-0.473395	0.239236	0.360022	-0.41371	0.519145	-0.0337429	0.786172	0.735144	0.718584	0.954804	0.769514	0.877982	0.106038	0.993029	0.758209	0.0605595	0.34838	-0.326778	-0.0258568	1.20954	-0.141315	-0.695891	-0.558632
	4.8611	-0.40256	-0.152341	-0.651075	1.25269	-0.954968	0.33241	0.123308	-0.0506687	-0.303111	-0.299034	0.991197	-0.395107	-0.261661	-1.06313	1.18195	0.437043	0.0331467	0.562246	-0.0679642	-0.368451	0.134923	0.320255	0.282458	0.0728908	0.988505	-0.496526	0.10117	0.304425	-0.400263	0.726836	0.166118	0.768237	0.76932	0.687565	0.765028	0.84049	0.801339	-0.0196537	1.02603	0.538113	-0.0281387	0.324879	-0.334537	0.0343098	0.972833	-0.2526	-1.12812	-1.07794
	4.9226	-0.202296	-0.0547794	-0.500168	1.13323	-0.730107	0.139093	0.202432	-0.264833	-0.401865	-0.335446	0.734761	-0.192025	-0.203215	-1.0714	1.23033	0.311062	-0.0635659	0.293232	-0.243492	-0.343968	0.0769451	0.332124	0.138589	0.166188	0.782519	-0.554282	0.242626	0.289249	-0.248162	0.690589	0.308361	0.76557	0.729036	0.561699	0.800531	0.826917	0.745662	-0.18133	0.94823	0.285929	-0.0458767	0.386054	-0.485979	-0.0936317	0.559343	-0.724396	-1.90941	-1.89414
	4.984	-0.402625	0.0281391	-0.402285	0.9243	-0.67751	-0.0428799	0.307087	-0.186448	-0.470506	-0.319099	0.612493	-0.136987	-0.279914	-1.18189	1.3091	0.284013	-0.128565	-0.00466575	-0.186333	-0.375276	-0.020311	0.243187	0.137632	0.0841808	0.66309	-0.245354	0.111314	0.248945	-0.176683	0.886383	0.376865	0.780476	0.71477	0.411298	0.534808	0.733404	0.630448	-0.370316	0.906276	0.196304	-0.0724628	0.422354	-0.541598	-0.257506	0.110986	-1.54599	-2.6143	-2.93892
	5.0455	-0.421445	0.10069	-0.222648	0.784818	-0.752228	-0.134663	0.314186	-0.139069	-0.429781	-0.307213	0.365532	-0.0403183	-0.231574	-1.08079	1.25325	0.0137737	-0.322773	-0.0807552	-0.10757	-0.435087	0.0365719	0.112102	0.211362	-0.0750664	0.63397	0.106081	-0.0138565	0.38764	-0.160118	1.10381	0.48836	0.670581	0.587599	0.361443	0.287411	0.453538	0.473397	-0.399718	0.741114	0.0109238	-0.133815	0.169408	-0.954847	-0.792625	-0.759439	-2.60669	-3.64227	-3.98983
	5.1069	-0.447499	0.0197514	-0.0465717	0.728355	-0.76199	-0.262709	0.330407	-0.228376	-0.532257	-0.259224	0.244999	-0.0303654	-0.203652	-1.0383	1.11131	0.05943	-0.442075	-0.256086	-0.210901	-0.348327	0.0145912	0.0489845	0.0642032	-0.0716762	0.455374	-0.00707282	-0.0450104	0.430983	-0.152798	1.31721	0.439968	0.72299	0.442993	0.213869	0.0649075	0.316892	0.361892	-0.503203	0.557433	-0.119291	-0.219699	-0.27563	-1.38798	-1.66762	-1.92863	-3.58313	-4.59801	-4.95743
	5.1683	-0.534877	0.0595916	0.0366024	0.560969	-0.821137	-0.395746	0.304001	-0.127433	-0.659354	-0.287989	-0.0165317	0.0475949	-0.383783	-0.977291	1.19581	-0.0776672	-0.549956	-0.365149	-0.118962	-0.360739	0.107295	0.067464	0.0605148	-0.21533	0.380965	0.0337059	-0.0790317	0.521938	0.0223095	1.34222	0.584409	0.519907	0.144055	0.0694931	-0.11358	0.110422	0.28215	-0.464496	0.386668	-0.302193	-0.536211	-0.84605	-2.25589	-2.78607	-3.1626	-4.68305	-5.55161	-5.72044
	5.2298	-0.499948	0.0772892	0.353596	0.650809	-0.728435	-0.451966	0.501363	-0.180447	-0.531668	-0.264228	-0.0136223	0.10178	-0.157301	-0.872151	1.06189	-0.151579	-0.642033	-0.510188	-0.0586761	-0.379938	0.124	0.147404	0.276468	-0.11414	0.445137	0.213762	-0.132893	0.681654	0.0129097	1.37725	0.731216	0.507494	0.0989632	-0.0791496	-0.293398	-0.0710476	0.16364	-0.384167	0.175787	-0.774096	-1.28856	-1.94742	-3.29692	-3.84542	-4.30531	-5.4791	-6.32777	-6.18057
	5.2912	-0.502761	0.274754	0.501642	0.9275	-0.643372	-0.365224	0.832562	-0.00567857	-0.455409	-0.186838	0.161828	0.396215	-0.0484119	-0.624858	1.1675	0.00655549	-0.528521	-0.490118	0.0620415	-0.0266811	0.39613	0.323019	0.791634	0.192076	0.645436	0.481994	0.111203	0.781909	0.141346	1.39258	0.847412	0.779291	0.237634	-0.0393936	-0.345749	0.0161037	0.171628	-0.0914406	-0.309055	-1.2766	-2.00497	-3.09772	-4.17761	-4.85156	-5.14779	-6.05011	-6.66826	-6.47508
	5.3527	-0.450861	0.362022	1.10993	1.39285	-0.162052	0.00758398	1.17984	0.367774	-0.04239	0.0890252	0.516132	0.915776	0.479545	-0.261201	1.29977	0.398074	-0.174387	-0.185742	0.409592	0.506463	0.987925	0.801409	1.46121	0.612651	0.943315	0.89066	0.344864	1.29144	0.390297	1.45496	1.15337	1.10914	0.622016	0.36118	-0.100751	0.119791	-0.017432	-0.129113	-0.855347	-1.96919	-2.89364	-4.09863	-4.8237	-5.35542	-5.69841	-6.32058	-6.51042	-6.34763
	5.4141	-0.108878	1.07439	1.9852	2.22986	0.595449	0.57291	1.84018	1.08787	0.664144	0.608762	1.01237	1.64576	1.21255	0.728322	2.03808	1.02084	0.637212	0.574632	1.28686	1.20184	1.85594	1.73347	2.67513	1.34505	1.76028	1.93459	0.959656	2.12649	0.945633	1.99628	1.8941	1.91818	1.505	1.06206	0.356692	0.34602	0.0154717	-0.139326	-1.44325	-2.56305	-3.30631	-4.54157	-5.2521	-5.79411	-5.53751	-6.05808	-6.15023	-5.83756
	5.4755	0.958149	2.42396	3.14464	3.51653	2.19974	1.50657	3.07938	2.32125	1.77451	1.90129	1.92593	2.79332	2.41328	2.20288	3.31889	2.14103	1.64226	1.46425	2.96169	2.61401	3.45237	3.11847	4.32735	2.42736	3.1297	3.43735	2.25959	3.77383	2.05731	3.05133	3.03849	3.10152	2.66481	1.83475	1.04516	0.461552	0.156524	-0.213144	-1.75981	-2.84833	-3.51253	-4.75394	-5.00812	-5.48634	-4.9348	-5.26658	-5.25012	-4.6924
	5.537	2.61785	4.34507	4.94914	5.51623	4.57198	3.27291	4.93771	4.34864	3.43347	3.64753	3.51638	4.59807	3.98171	4.64905	5.32927	3.96484	3.4564	3.27585	5.27744	4.51551	5.70842	5.25328	6.38456	3.99447	5.08518	5.76111	4.26638	6.0221	3.74836	4.88238	4.81582	4.75118	3.92464	2.86387	1.82069	0.648363	0.0135052	-0.051252	-1.79497	-2.70075	-3.41506	-4.07708	-4.35974	-4.59537	-3.59772	-4.04493	-3.79455	-2.93928
	5.5984	5.33344	7.09937	7.53072	8.40121	7.61043	5.73279	7.59919	7.1415	6.11658	6.12991	6.07247	7.51259	6.36881	7.61087	8.26263	6.63812	6.31068	5.90278	8.42047	7.18358	8.27073	7.70417	8.85623	6.24412	7.72829	8.79502	7.15617	9.08557	6.20575	7.25211	7.0835	6.63365	5.41029	3.781	2.4948	0.972272	0.0250504	0.339233	-1.47514	-2.01732	-2.69852	-2.93383	-3.29162	-3.1921	-1.85109	-2.30663	-1.89446	-0.755638
	5.6599	8.90534	10.7819	11.1426	12.2854	11.6378	8.88198	11.0292	10.9897	9.85181	9.46078	9.33969	11.6087	9.41805	11.7785	12.0344	10.2224	9.83178	9.304	12.7399	10.5907	11.7701	11.1062	12.6465	9.37203	11.3246	13.656	10.8977	13.2154	9.415	10.1799	9.77077	8.49752	6.48812	4.48969	2.94381	1.21309	0.523954	0.929219	-0.665978	-0.730896	-1.61564	-1.57946	-1.73109	-1.43534	0.312027	-0.203792	0.3077	1.28671
	5.7213	14.4796	16.192	16.7628	17.12	18.0143	13.5138	16.5003	16.4224	15.1894	14.1675	14.0245	17.7124	14.0735	18.1938	16.9415	15.7097	14.7654	13.9684	19.3801	15.6329	17.5484	16.1387	19.0774	13.825	16.4235	20.7773	16.679	19.7564	14.1995	13.563	13.4398	9.84477	6.85816	4.82289	3.14067	1.70538	1.19676	1.63034	0.117947	0.382537	-0.178939	-0.206856	-0.0785572	0.471008	2.33863	2.06585	2.5103	3.22123
	5.7827	22.2905	24.2859	24.92	23.1067	27.1772	20.821	25.2633	24.3774	23.1448	21.5157	20.9321	26.1126	21.3194	26.912	23.7947	23.1152	22.2745	20.6408	28.7217	23.5436	25.508	23.1445	27.4574	21.0932	23.6415	29.0437	24.1598	27.5664	19.6936	17.1026	16.8399	10.9034	7.10911	4.74147	3.21141	2.17959	1.70764	2.22448	1.2125	1.7571	1.51128	1.60283	1.83117	2.55556	4.37605	4.24826	4.4653	4.94389
	5.8442	32.2334	34.1569	34.3236	29.9794	36.7549	30.4119	35.2881	33.5635	32.1778	30.2875	30.2668	34.8337	31.1698	35.1172	31.7175	31.3901	31.6448	28.8298	37.0907	32.378	33.1882	30.7065	35.1325	30.4836	31.1521	35.0325	30.8148	32.6833	23.7806	19.4307	18.172	11.6548	7.24123	4.50478	3.12488	2.60241	2.48223	2.88649	2.12657	2.95727	2.96976	3.033	3.43109	4.30541	6.1087	6.05685	6.23744	6.63944
	5.9056	40.5738	41.6969	41.0889	36.1479	43.129	39.137	42.5115	40.5967	39.5737	37.8355	38.6939	40.6596	39.7108	39.5765	38.1791	37.6246	38.8575	36.0099	41.0324	38.6396	37.8176	36.5981	38.7079	37.5527	35.9275	36.4656	33.1746	32.3713	24.458	19.5405	16.9954	11.6702	7.03997	4.03451	2.90238	2.96989	2.98617	3.24686	3.06186	3.81496	4.26136	4.50715	4.93822	5.51233	7.26817	8.14177	7.9797	8.68652
	5.9671	44.4282	44.4003	42.8243	39.3716	44.5136	43.8068	44.6134	42.6874	42.5178	41.402	43.0145	41.8158	43.6092	39.4561	40.3749	39.5492	41.1813	39.4573	39.7349	39.8118	37.9728	38.367	37.2134	39.3148	36.0585	32.4914	29.937	26.8806	21.2472	16.963	14.0016	10.4151	6.35414	3.45728	2.68369	3.13511	3.42405	3.69114	3.78073	4.70071	5.2945	5.41875	6.16658	6.66244	8.70644	10.4383	10.7074	11.0923
	6.0285	42.7907	42.0866	40.1758	39.0471	41.1081	43.3443	41.5463	40.2594	40.5359	40.142	42.1836	38.6854	42.241	35.2236	38.4007	36.8998	38.2852	38.35	34.3965	36.3381	34.3526	35.6687	31.2937	35.1898	31.0513	25.0009	23.0128	19.0922	15.9137	12.8875	10.1319	8.39484	5.18885	3.14194	2.32368	3.21704	3.90838	3.92987	4.34871	5.20687	5.80542	6.03532	7.15801	7.86628	10.5501	13.1408	13.6788	13.382
	6.0899	37.5409	36.0916	33.7552	35.1644	34.721	38.7558	35.2772	34.5114	35.1734	35.1384	37.2258	32.5496	36.8407	28.594	32.9736	30.9945	31.9338	33.4037	26.9214	29.5517	27.7794	29.4648	23.2251	27.1826	23.1526	16.8151	15.3323	12.3152	10.5836	8.65053	6.46371	6.18143	4.12944	2.6235	1.91796	3.14566	4.00875	4.19354	4.37307	5.41437	6.16177	6.57567	8.44743	9.68381	12.7429	15.64	15.9279	15.2605
	6.1514	30.2161	28.4596	26.3552	29.1676	27.2246	31.6876	27.3938	27.125	28.0397	27.9966	30.0553	25.3057	29.4498	21.4204	26.1831	24.1229	24.2678	26.2833	19.5514	21.8189	20.52	21.4162	15.1654	18.2816	14.9614	9.83199	9.10584	6.9902	6.28866	5.24307	3.53536	3.97416	3.23724	2.14007	1.55811	2.83804	3.85139	4.20166	4.36129	5.21422	6.14855	7.06937	10.0346	11.6071	14.2468	16.8796	16.6699	16.2537
	6.2128	22.7127	20.9145	19.0861	22.4055	20.0344	24.1294	19.8592	20.058	20.8821	20.6715	22.4003	18.4756	21.9303	15.0138	19.3072	17.4126	16.9573	18.8408	13.17	14.4785	13.6944	13.7148	8.58741	10.9688	8.47061	4.60964	4.49756	2.94916	2.91064	2.56903	1.16472	2.36729	2.52251	1.75555	1.23856	2.58197	3.63201	4.0072	4.22204	4.82648	5.91201	7.13248	11.2398	12.4914	14.2936	16.2312	15.6496	16.0675
	6.2743	16.1401	14.4906	13.138	16.2303	13.8499	17.3953	13.4978	13.894	14.6162	14.2375	15.6669	12.6333	15.333	9.69352	13.7407	11.6228	11.208	12.4653	8.21357	8.38462	7.69308	7.68754	3.50424	5.23209	3.51	0.659348	1.05267	0.064954	0.345129	0.624103	-0.653431	1.22737	1.66469	1.60248	1.00008	2.25066	3.23016	3.59613	3.72873	4.23785	5.60033	6.98316	11.6444	11.9198	13.318	13.9831	13.0474	14.744
	6.3357	10.7298	9.34186	8.05931	11.0257	9.07615	11.9804	8.33756	8.68194	9.52526	8.89698	10.1232	8.03407	9.93666	5.53185	8.93237	6.8695	6.37414	6.90049	4.01505	3.26196	2.9222	2.71959	-0.470674	0.90542	-0.202797	-2.23135	-1.47835	-1.9839	-1.47812	-0.865094	-1.92078	0.155106	0.891746	1.08747	0.754334	1.74418	2.83785	2.97073	3.29593	3.52983	5.33631	6.59024	11.1542	10.0858	11.3753	10.79	10.1475	12.3261
	6.3971	6.5397	5.4242	4.24362	6.77914	5.18322	7.42106	4.16488	4.51994	5.29352	4.80531	5.71361	4.23915	5.41845	2.22792	5.01967	2.85976	2.29504	2.66682	0.36657	-0.781028	-0.940703	-0.893278	-3.45567	-2.30477	-3.00517	-4.33115	-3.40097	-3.58547	-2.81586	-1.84502	-2.779	-0.500597	0.326776	1.08218	0.513761	1.23817	2.42897	2.3334	2.68512	2.75669	4.84381	6.03911	9.35023	7.42803	8.986	7.78444	7.25912	9.55172
	6.4586	3.13601	2.29808	1.21742	3.33351	2.00369	3.64526	0.835613	1.17354	1.96044	1.46948	2.23772	1.37886	2.0531	-0.472815	1.78475	-0.396144	-1.00616	-1.0307	-2.80679	-3.9684	-4.02326	-3.70323	-5.45738	-4.5381	-4.81822	-5.8028	-4.70985	-4.56136	-3.80673	-2.52905	-3.36833	-1.00943	-0.100591	0.832495	0.0231202	0.874239	1.8466	1.51646	1.9314	2.05246	4.18757	5.10847	7.05976	5.00134	6.66636	4.92078	4.67954	6.56784
	6.52	0.373722	-0.0449577	-1.21537	0.647511	-0.480273	0.374097	-1.76352	-1.56747	-0.69779	-1.12874	-0.470147	-0.98	-0.68777	-2.71908	-1.12263	-3.18274	-3.89503	-3.95068	-5.20657	-6.32376	-6.20317	-5.71331	-6.84331	-6.19064	-6.00352	-6.70746	-5.6722	-5.07109	-4.26243	-2.8853	-3.80608	-1.40812	-0.566457	0.637306	-0.207308	0.305119	1.27674	0.795491	1.18625	1.13245	3.22324	3.914	4.64203	2.90218	4.4117	2.58199	2.5639	4.01923
	6.5815	-1.65117	-1.94135	-3.29717	-1.74593	-2.4606	-2.08557	-3.72575	-3.62867	-2.68103	-3.2376	-2.56578	-2.91673	-2.9303	-4.66579	-3.62217	-5.47877	-6.15109	-6.07731	-7.18526	-7.87186	-7.64402	-7.19135	-7.68176	-7.11183	-6.78937	-7.2554	-5.89619	-5.53859	-4.69941	-3.14146	-4.18784	-1.74237	-0.82354	0.179223	-0.577595	-0.28432	0.759196	0.263947	0.560221	0.409964	2.07287	2.61695	2.52973	1.21913	2.30297	0.692442	0.655632	1.77095
	6.6429	-3.42354	-3.3615	-4.85431	-3.59167	-4.18143	-3.99276	-5.32014	-5.3844	-4.35615	-4.99773	-4.23566	-4.72131	-4.76426	-6.53475	-5.70312	-7.49719	-7.8962	-7.75005	-8.61744	-8.92458	-8.73894	-8.09715	-8.15692	-7.57526	-7.11525	-7.43965	-6.14074	-5.55681	-4.71453	-3.18966	-4.31675	-1.91845	-1.14092	-0.167804	-0.907856	-0.884495	0.0858112	-0.475059	-0.121968	-0.262451	1.11211	1.18248	0.565411	-0.221761	0.598005	-0.734118	-0.70032	-0.0989326
	6.7043	-4.71439	-4.67301	-6.14281	-5.08138	-5.39081	-5.56808	-6.45913	-6.71491	-5.75688	-6.3649	-5.8478	-6.25011	-6.36595	-8.22668	-7.4332	-8.93616	-9.09306	-8.67756	-9.44336	-9.68032	-9.34467	-8.70135	-8.35083	-7.68764	-7.03521	-7.42578	-6.08891	-5.66588	-4.69118	-3.29256	-4.46963	-2.16413	-1.58536	-0.644397	-1.38091	-1.36946	-0.346237	-0.973683	-0.728495	-1.00666	0.141655	-0.0657799	-0.829868	-1.45181	-0.897503	-1.93268	-1.74166	-1.40032
	6.7658	-5.68938	-5.57459	-7.13328	-5.97531	-6.32876	-6.67831	-7.29467	-7.72096	-6.80328	-7.5899	-7.2047	-7.84671	-7.97147	-9.5362	-8.74551	-10.1057	-9.86498	-9.43655	-9.933	-9.95472	-9.47768	-8.82341	-8.3977	-7.44645	-6.98049	-7.19957	-5.91495	-5.62796	-4.59928	-3.45056	-4.59787	-2.32679	-2.0438	-1.15853	-1.75122	-1.86596	-0.841001	-1.51338	-1.33882	-1.61514	-0.641784	-1.18541	-1.99052	-2.28781	-2.02902	-2.76701	-2.64419	-2.46425
	6.8272	-6.31876	-6.31527	-7.81627	-6.6961	-6.9862	-7.39665	-7.96523	-8.54892	-7.7843	-8.64011	-8.37749	-9.22109	-9.16807	-10.5636	-9.61772	-10.6555	-10.393	-9.78004	-10.1908	-9.97159	-9.40497	-8.73662	-8.06686	-7.19674	-6.61352	-7.04523	-5.66386	-5.34966	-4.49668	-3.56351	-4.50872	-2.62618	-2.29324	-1.67022	-2.19581	-2.31725	-1.46424	-2.01968	-1.88021	-2.09907	-1.42746	-2.13658	-3.09779	-3.07545	-2.74559	-3.60105	-3.31711	-3.53004
	6.8887	-6.83836	-6.85111	-8.10383	-7.05166	-7.46915	-8.04364	-8.58515	-9.22239	-8.76272	-9.61557	-9.36318	-10.2637	-9.8711	-11.1238	-10.047	-10.9271	-10.6414	-9.8664	-10.0817	-9.80991	-9.10867	-8.31501	-7.70572	-6.69233	-6.30196	-6.71738	-5.35076	-5.20388	-4.43316	-3.57635	-4.42251	-2.76087	-2.61704	-2.08308	-2.67597	-2.77625	-1.92591	-2.55233	-2.274	-2.70099	-2.17465	-2.8093	-3.79301	-3.75863	-3.51301	-4.29416	-3.83742	-4.03856
	6.9501	-7.1846	-7.22204	-8.34381	-7.3492	-7.9111	-8.4707	-9.23658	-9.94921	-9.58639	-10.4992	-10.0932	-11.054	-10.3599	-11.5407	-10.4007	-11.0109	-10.5527	-9.84823	-9.68333	-9.38088	-8.72273	-7.85718	-7.38883	-6.22379	-6.02457	-6.29342	-5.06187	-4.99687	-4.43879	-3.62824	-4.45433	-2.96748	-2.83885	-2.57867	-3.04447	-3.0852	-2.45048	-2.82904	-2.71595	-3.17001	-2.80303	-3.40839	-4.45582	-4.07998	-4.00587	-4.60072	-4.12592	-4.6306
	7.0116	-7.34168	-7.41514	-8.66609	-7.69426	-8.32471	-9.08523	-9.8324	-10.6787	-10.3073	-11.0266	-10.7926	-11.3459	-10.6781	-11.5909	-10.356	-10.8152	-10.2704	-9.52143	-9.14611	-8.77744	-8.0031	-7.29274	-6.96798	-5.7436	-5.57703	-6.11232	-5.00363	-4.71979	-4.37864	-3.68491	-4.49193	-3.2036	-3.24492	-3.00979	-3.4482	-3.35962	-2.83865	-3.39313	-3.08239	-3.73924	-3.28194	-4.00464	-4.86422	-4.50272	-4.33393	-5.18404	-4.40818	-4.84469
	7.073	-7.44536	-7.6934	-8.9886	-8.20122	-8.75145	-9.72747	-10.5574	-11.203	-10.8524	-11.5246	-10.9985	-11.488	-10.7154	-11.5111	-10.0362	-10.2508	-9.95308	-9.05604	-8.47074	-8.20592	-7.48153	-6.63132	-6.38638	-5.43232	-5.20082	-5.74383	-4.65302	-4.59865	-4.24418	-3.66858	-4.4964	-3.31686	-3.59747	-3.37818	-3.93163	-3.62442	-3.18243	-3.84808	-3.26938	-4.07731	-3.621	-4.31922	-5.19775	-4.76278	-4.65005	-5.405	-4.68855	-5.19818
	7.1344	-7.60056	-8.02788	-9.42718	-8.6448	-9.22797	-10.2236	-10.9044	-11.6591	-11.2125	-11.6268	-10.9526	-11.4541	-10.4967	-11.3049	-9.61461	-9.82591	-9.16377	-8.46582	-7.77626	-7.55921	-6.79041	-6.04578	-6.07816	-5.01056	-5.05714	-5.40811	-4.48629	-4.52323	-4.28113	-3.61836	-4.55668	-3.6119	-3.84748	-3.59977	-4.24326	-3.80793	-3.47607	-4.08958	-3.58218	-4.31979	-3.86051	-4.45332	-5.38581	-4.91368	-4.76666	-5.53854	-4.9018	-5.51974
	7.1959	-7.89154	-8.42141	-9.71391	-9.18834	-9.73823	-10.7281	-11.2913	-11.9244	-11.3973	-11.746	-11.0354	-11.2143	-10.1854	-10.958	-9.06271	-9.19703	-8.53371	-7.894	-6.88684	-6.90276	-6.28976	-5.59947	-5.8095	-5.03607	-4.64447	-5.36866	-4.49304	-4.48541	-4.541	-3.73155	-4.61756	-3.81681	-4.06347	-3.91023	-4.48655	-4.22135	-3.77625	-4.19017	-3.71868	-4.52866	-3.94908	-4.58585	-5.38972	-5.10422	-4.96706	-5.76358	-4.9095	-5.51273
	7.2573	-8.10494	-8.97456	-10.154	-9.74543	-10.2795	-11.1123	-11.4395	-11.9383	-11.3931	-11.5761	-10.7627	-10.9444	-9.72634	-10.4591	-8.38163	-8.55051	-7.61281	-7.20347	-6.36737	-6.37102	-5.82767	-5.15456	-5.45107	-4.76074	-4.40853	-5.24805	-4.55677	-4.49198	-4.55127	-3.64486	-4.81938	-4.03656	-4.20117	-4.15889	-4.68146	-4.39658	-3.98744	-4.49117	-3.94255	-4.52774	-4.17916	-4.76521	-5.44019	-5.24823	-5.03355	-5.66808	-5.0548	-5.47346
	7.3188	-8.61934	-9.45152	-10.5863	-10.0158	-10.6275	-11.3301	-11.5383	-11.8639	-11.2101	-11.0893	-10.3859	-10.2013	-9.18859	-9.73514	-7.50406	-7.87063	-6.91847	-6.60656	-5.84899	-5.84083	-5.44608	-4.81853	-5.2417	-4.78823	-4.30998	-5.11584	-4.45687	-4.45258	-4.52909	-3.73936	-4.76952	-4.22767	-4.49286	-4.44698	-4.87468	-4.62254	-4.03448	-4.61117	-4.22503	-4.75239	-4.2805	-4.7669	-5.3775	-5.12211	-4.95831	-5.61519	-5.18988	-5.35127
	7.3802	-9.20576	-9.70866	-10.8399	-10.2426	-10.7449	-11.5123	-11.438	-11.5603	-10.8702	-10.594	-9.67053	-9.40382	-8.42765	-8.93908	-6.7877	-7.36862	-6.21043	-5.97784	-5.3941	-5.48846	-5.24043	-4.54836	-5.06381	-4.73532	-4.16494	-5.12531	-4.61072	-4.41783	-4.67201	-3.84181	-4.87148	-4.38762	-4.54109	-4.53223	-4.91038	-4.7836	-4.12012	-4.74981	-4.34934	-4.83835	-4.34756	-5.0525	-5.27828	-5.10875	-4.94767	-5.55063	-5.16857	-5.38607
	7.4416	-9.69777	-10.2039	-11.1916	-10.4422	-10.79	-11.3506	-11.0458	-11.0677	-10.2738	-9.78559	-8.88643	-8.5452	-7.69825	-8.43088	-6.10007	-6.87877	-5.70848	-5.4744	-5.1072	-5.22895	-4.91559	-4.45204	-5.08187	-4.8374	-4.18	-5.06807	-4.75771	-4.53068	-4.76529	-3.89479	-4.98187	-4.47235	-4.61756	-4.57438	-4.93227	-4.89584	-4.0909	-4.77133	-4.51181	-4.74899	-4.33205	-4.8802	-5.06064	-5.1381	-5.01361	-5.43982	-5.21583	-5.33347
	7.5031	-10.0623	-10.3919	-11.312	-10.3774	-10.7063	-11.013	-10.4788	-10.5222	-9.53857	-9.08966	-7.89441	-7.62077	-6.85382	-7.57453	-5.62181	-6.57868	-5.23139	-5.25372	-4.9281	-4.97169	-4.87679	-4.308	-5.0648	-4.87763	-4.2202	-5.20002	-4.80546	-4.5255	-4.97482	-4.06008	-5.14013	-4.66702	-4.78633	-4.59485	-4.95571	-4.9993	-4.33791	-4.74829	-4.562	-4.65007	-4.38715	-4.88942	-4.95762	-5.05041	-4.83901	-5.38118	-5.15734	-5.34168
	7.5645	-10.2874	-10.4579	-11.1744	-10.1476	-10.3167	-10.4789	-9.86585	-9.85935	-8.8931	-8.29335	-7.04437	-6.91416	-6.09382	-6.96803	-5.14575	-5.99346	-4.9028	-4.90812	-4.8593	-4.87415	-4.95078	-4.38324	-5.13257	-4.98621	-4.03455	-5.19924	-4.87713	-4.62662	-5.04435	-4.14639	-4.96856	-4.66797	-4.85423	-4.6183	-4.95464	-5.10116	-4.39308	-4.73246	-4.56225	-4.62392	-4.27588	-4.94137	-4.80996	-4.887	-4.67301	-5.13008	-5.00897	-5.32231
	7.626	-10.3373	-10.3382	-10.9108	-9.65378	-9.59662	-9.93281	-9.06929	-9.05079	-8.04533	-7.65238	-6.11885	-6.24756	-5.62619	-6.46264	-4.63529	-5.7262	-4.82479	-4.61471	-4.76681	-4.84601	-4.78036	-4.36713	-5.14875	-4.92442	-4.24596	-5.29777	-4.75961	-4.69778	-5.06543	-4.29241	-5.10955	-4.65469	-4.8589	-4.57614	-4.91699	-5.10209	-4.39327	-4.72166	-4.62708	-4.60359	-4.31301	-4.88042	-4.86955	-4.80673	-4.6064	-5.04654	-4.84895	-5.15602
	7.6874	-10.3265	-10.0874	-10.5775	-9.15053	-8.9331	-9.17242	-8.07323	-8.36629	-7.32382	-6.92038	-5.33027	-5.76538	-5.09179	-5.88564	-4.37502	-5.35926	-4.76495	-4.44252	-4.77558	-4.85566	-4.85872	-4.44604	-5.24356	-5.01997	-4.09538	-5.44847	-4.88589	-4.75094	-5.02159	-4.45381	-5.09508	-4.62983	-4.7386	-4.53801	-4.89541	-5.20132	-4.35777	-4.66461	-4.51008	-4.45419	-4.37117	-4.72666	-4.74613	-4.73034	-4.50768	-4.7912	-4.66397	-4.93586
	7.7488	-9.97053	-9.78314	-10.0537	-8.44584	-8.18866	-8.44232	-7.30882	-7.53356	-6.6334	-6.37641	-4.63393	-5.29556	-4.83745	-5.49141	-4.19353	-5.10987	-4.61448	-4.3329	-4.78102	-4.89884	-4.83553	-4.49825	-5.27086	-5.05588	-4.11684	-5.45652	-4.8912	-4.84113	-5.05988	-4.42187	-5.08477	-4.46021	-4.81118	-4.47905	-4.76846	-5.14969	-4.30435	-4.68555	-4.34218	-4.47102	-4.21775	-4.66869	-4.62957	-4.67489	-4.29763	-4.56786	-4.5118	-4.83298
	7.8103	-9.67263	-9.11361	-9.28076	-7.76646	-7.34912	-7.66309	-6.43281	-6.79245	-5.9271	-5.80925	-4.09541	-4.92617	-4.54783	-5.23941	-4.08379	-4.96241	-4.65141	-4.2854	-4.93409	-4.96869	-4.97022	-4.45869	-5.40886	-5.1011	-4.15426	-5.45779	-4.92721	-4.82787	-5.06926	-4.31554	-5.09137	-4.32524	-4.72236	-4.35607	-4.74926	-5.26095	-4.30746	-4.32059	-4.34831	-4.30572	-4.09579	-4.46798	-4.48762	-4.39683	-4.15221	-4.35606	-4.21338	-4.72319
	7.8717	-9.06906	-8.57276	-8.4216	-6.92333	-6.5424	-6.92692	-5.60269	-6.17954	-5.31984	-5.28803	-3.61938	-4.60218	-4.21955	-5.06286	-4.01114	-4.84689	-4.64757	-4.40617	-5.05905	-5.08609	-4.98008	-4.36767	-5.37537	-5.09223	-4.12558	-5.44572	-4.95441	-4.83764	-5.02845	-4.33749	-5.01702	-4.31985	-4.66915	-4.39535	-4.66775	-5.0912	-4.11661	-4.25054	-4.20426	-4.27749	-4.02275	-4.35835	-4.34476	-4.27335	-3.98526	-4.23401	-3.98017	-4.4851
	7.9332	-8.44901	-7.77887	-7.66509	-6.16456	-5.76531	-6.22295	-5.09674	-5.57303	-4.84341	-4.94662	-3.37294	-4.41564	-4.23173	-4.95058	-4.03755	-4.79209	-4.63194	-4.46318	-5.17319	-5.29504	-5.15685	-4.34156	-5.49147	-5.11587	-4.21991	-5.41707	-4.83528	-4.72706	-5.08775	-4.30954	-5.05334	-4.36529	-4.58261	-4.19565	-4.63594	-5.06378	-3.9114	-4.14323	-4.11464	-4.15613	-3.83103	-4.14339	-4.16024	-4.0856	-3.81598	-4.05263	-3.89565	-4.21372
	7.9946	-7.77779	-6.96443	-6.84834	-5.57452	-5.14987	-5.50706	-4.48124	-5.05347	-4.49542	-4.75171	-3.2722	-4.30504	-4.05509	-5.07505	-3.86191	-4.84989	-4.78981	-4.63236	-5.29884	-5.26581	-5.15727	-4.23408	-5.46079	-5.02478	-4.34504	-5.441	-4.92518	-4.79613	-4.85845	-4.21286	-4.91151	-4.22651	-4.46491	-4.18977	-4.45493	-4.82659	-3.67222	-3.97123	-3.99528	-3.93243	-3.68574	-4.01783	-3.9862	-3.56745	-3.61467	-3.7844	-3.5937	-3.93872
	8.056	-6.95427	-6.41524	-6.06868	-4.90764	-4.77458	-5.01094	-4.15717	-4.71207	-4.21233	-4.69521	-3.19686	-4.27401	-4.17131	-5.091	-3.95756	-4.85731	-4.89143	-4.67315	-5.43385	-5.4457	-5.09215	-4.27648	-5.45601	-4.91322	-4.31308	-5.35528	-4.83575	-4.84306	-4.80576	-4.0634	-4.97476	-4.0989	-4.30224	-3.89929	-4.19705	-4.68484	-3.43315	-3.87645	-3.82733	-3.79896	-3.57914	-3.85515	-3.86821	-3.4738	-3.2771	-3.55658	-3.34327	-3.74087
	8.1175	-6.29875	-5.60691	-5.39205	-4.32679	-4.23814	-4.48649	-3.86301	-4.4908	-4.01776	-4.56636	-3.2088	-4.31188	-4.11296	-5.13068	-3.92286	-5.07216	-5.06862	-4.82849	-5.46189	-5.4295	-5.15852	-4.20239	-5.47008	-4.82159	-4.38773	-5.29827	-4.76331	-4.78402	-4.82475	-4.08669	-4.7967	-3.86665	-4.09132	-3.70765	-4.12562	-4.4082	-3.19271	-3.57883	-3.58539	-3.65298	-3.41433	-3.69215	-3.57181	-3.34953	-3.17766	-3.28776	-3.14255	-3.3849
	8.1789	-5.5448	-4.99073	-4.77709	-3.89724	-3.99853	-4.16419	-3.59867	-4.29462	-3.88539	-4.60455	-3.52288	-4.30541	-4.14199	-5.19983	-4.19321	-5.08472	-5.12195	-4.83459	-5.41971	-5.42653	-5.17996	-4.35795	-5.47717	-4.71713	-4.21363	-5.27038	-4.59794	-4.65301	-4.6952	-3.98799	-4.69635	-3.79918	-3.78726	-3.5322	-4.0166	-4.20777	-3.00351	-3.47696	-3.32883	-3.45999	-3.14915	-3.47827	-3.25767	-3.16057	-2.92944	-3.19978	-3.04313	-2.90855
	8.2404	-4.96791	-4.4658	-4.27031	-3.65617	-3.70799	-3.93059	-3.55269	-4.25058	-4.06332	-4.60267	-3.41201	-4.46217	-4.24507	-5.2287	-4.27865	-5.19205	-5.17766	-4.89642	-5.4653	-5.36866	-5.13268	-4.17882	-5.37196	-4.55756	-4.243	-5.19891	-4.44033	-4.57588	-4.56946	-3.94308	-4.67663	-3.76759	-3.60666	-3.55324	-4.01534	-3.88928	-2.79429	-3.34406	-3.1636	-3.16242	-3.02485	-3.25317	-3.02647	-2.97016	-2.65459	-2.93796	-2.6572	-2.62964
	8.3018	-4.41293	-3.94981	-4.08459	-3.33221	-3.7211	-3.76978	-3.63992	-4.18941	-4.14865	-4.53694	-3.61651	-4.5134	-4.29267	-5.23279	-4.24614	-5.26474	-5.15317	-4.91426	-5.38595	-5.23511	-5.07253	-4.28363	-5.14412	-4.51259	-4.20053	-4.91267	-4.42205	-4.42673	-4.45482	-3.89605	-4.54717	-3.52559	-3.30895	-3.24618	-3.82267	-3.58969	-2.60717	-3.20187	-2.97997	-2.83347	-2.85982	-3.12626	-2.81552	-2.84883	-2.28288	-2.76517	-2.45225	-2.31455
	8.3632	-3.88603	-3.6554	-3.86146	-3.27759	-3.74492	-3.75656	-3.69744	-4.33893	-4.3315	-4.65874	-3.84425	-4.6453	-4.32573	-5.30578	-4.40441	-5.27829	-5.18883	-4.91585	-5.21981	-5.20936	-5.04607	-4.21269	-5.09472	-4.3689	-4.26325	-4.81186	-4.38972	-4.28984	-4.45536	-3.72667	-4.51173	-3.33827	-3.09213	-3.15014	-3.72641	-3.19814	-2.4207	-2.99902	-2.81766	-2.57109	-2.71301	-2.91826	-2.54545	-2.58645	-1.92392	-2.48346	-2.21456	-1.91603
	8.4247	-3.62315	-3.38185	-3.72778	-3.17887	-3.71058	-3.71196	-3.90985	-4.49311	-4.61106	-4.75719	-3.93819	-4.68671	-4.4082	-5.32778	-4.34551	-5.40607	-5.05007	-5.05491	-5.03207	-5.17116	-4.96513	-4.24138	-4.97931	-4.25029	-4.12539	-4.71978	-4.26006	-4.15522	-4.24767	-3.52554	-4.43385	-3.27049	-2.89001	-2.89825	-3.55454	-2.93386	-2.37889	-2.91879	-2.60012	-2.15514	-2.58887	-2.71463	-2.31167	-2.29065	-1.45854	-2.30349	-1.9924	-1.71856
	8.4861	-3.55724	-3.30253	-3.85778	-3.24368	-3.77609	-3.86276	-4.17705	-4.68366	-4.6398	-4.83565	-4.11684	-4.67517	-4.47394	-5.41603	-4.36189	-5.35146	-5.13742	-4.87977	-4.99904	-5.0712	-4.78025	-4.09359	-4.92036	-4.12516	-4.04771	-4.56982	-4.13521	-3.86556	-4.1352	-3.36197	-4.20221	-3.15862	-2.70719	-2.65059	-3.38994	-2.60481	-2.16234	-2.71817	-2.29704	-1.92759	-2.54667	-2.43947	-2.04308	-2.04259	-1.14549	-1.91712	-1.73754	-1.42487
	8.5476	-3.33387	-3.17925	-3.98372	-3.14378	-3.91245	-3.92361	-4.3347	-4.88999	-4.9106	-4.82155	-4.27405	-4.65573	-4.43547	-5.63512	-4.20965	-5.32819	-4.99259	-4.80711	-4.76674	-4.95668	-4.55845	-4.15057	-4.76499	-3.9294	-3.95459	-4.30246	-3.88555	-3.69824	-3.99528	-3.26869	-4.0178	-3.04963	-2.6153	-2.51595	-3.21785	-2.21505	-2.01901	-2.56936	-2.13397	-1.6799	-2.33151	-2.12294	-1.85972	-1.74523	-0.963808	-1.92578	-1.39312	-1.21107
	8.609	-3.32568	-3.30369	-4.22592	-3.3042	-3.98745	-4.07081	-4.56831	-4.8825	-5.04128	-4.89023	-4.28849	-4.77803	-4.5227	-5.60595	-4.21623	-5.30132	-4.96815	-4.64968	-4.77953	-4.69915	-4.56557	-4.01207	-4.57546	-3.71582	-3.75612	-4.28281	-3.64365	-3.77515	-3.80769	-3.00377	-3.84406	-2.84126	-2.47004	-2.18617	-2.97912	-1.78123	-1.83063	-2.35614	-1.81499	-1.36256	-2.10247	-1.91195	-1.67803	-1.59028	-0.759633	-1.85071	-1.0711	-1.0527
	8.6704	-3.29108	-3.13896	-4.3875	-3.35328	-4.0957	-4.15272	-4.80313	-4.99314	-5.15754	-4.87416	-4.29312	-4.66581	-4.52662	-5.60727	-4.07628	-5.23505	-4.94554	-4.4902	-4.54348	-4.57265	-4.45111	-3.91507	-4.58221	-3.54139	-3.68425	-4.03837	-3.43572	-3.57543	-3.6618	-2.86295	-3.60161	-2.62608	-2.32083	-2.09483	-2.69896	-1.49473	-1.6614	-2.21195	-1.64875	-1.13379	-1.91197	-1.59747	-1.4169	-1.28319	-0.50609	-1.69618	-0.721195	-0.82165
	8.7319	-3.44632	-3.29484	-4.39918	-3.40487	-4.37697	-4.36862	-4.95337	-4.88393	-5.1087	-5.01385	-4.15561	-4.62077	-4.62523	-5.55827	-3.99921	-5.14428	-4.87467	-4.23016	-4.53635	-4.27863	-4.46679	-3.79401	-4.42701	-3.34892	-3.48627	-3.87401	-3.20531	-3.45374	-3.30496	-2.54889	-3.40009	-2.46439	-2.1707	-1.79132	-2.36944	-1.01278	-1.52462	-1.99771	-1.38979	-0.989072	-1.77639	-1.32556	-1.26117	-1.07514	-0.357709	-1.52051	-0.558568	-0.674615
	8.7933	-3.53315	-3.35092	-4.55512	-3.58522	-4.60797	-4.48653	-4.90437	-5.03633	-5.1602	-5.0088	-4.33314	-4.6667	-4.64458	-5.56967	-3.99617	-5.12911	-4.68686	-4.05457	-4.4806	-4.12039	-4.33964	-3.54143	-4.3872	-3.17961	-3.31426	-3.61464	-2.92248	-3.26236	-3.24489	-2.35339	-3.11401	-2.31746	-1.98973	-1.62609	-2.14299	-0.992709	-1.33761	-1.9404	-1.23374	-0.722176	-1.63294	-1.19726	-0.881433	-0.820095	-0.235795	-1.39326	-0.222842	-0.532597
	8.8548	-3.80018	-3.55617	-4.65503	-3.69141	-4.70167	-4.67184	-4.9468	-5.0299	-5.16272	-5.05708	-4.07516	-4.56383	-4.55891	-5.45299	-3.8725	-5.10836	-4.60936	-3.85886	-4.45651	-3.98466	-4.18885	-3.42615	-4.12421	-3.02648	-3.2701	-3.47485	-2.73824	-3.11248	-3.09241	-2.08454	-3.03708	-2.041	-1.80436	-1.66788	-1.95484	-0.813025	-1.24783	-1.71305	-0.994395	-0.546223	-1.36987	-0.976557	-0.678241	-0.607619	-0.154589	-1.28256	-0.0965405	-0.468205
	8.9162	-3.89916	-3.71461	-4.86947	-3.84801	-4.86025	-4.58453	-4.82075	-5.01198	-5.04807	-5.06684	-4.07843	-4.41334	-4.4584	-5.3565	-3.73441	-5.00503	-4.53367	-3.69917	-4.34819	-3.86253	-3.89393	-3.20628	-3.96419	-3.0254	-3.00304	-3.1759	-2.53581	-2.95541	-2.83156	-1.94534	-2.94719	-1.71301	-1.64936	-1.45522	-1.73751	-0.647023	-1.02433	-1.62029	-0.736047	-0.47722	-1.23835	-0.764316	-0.412953	-0.541686	0.065863	-1.16941	0.117605	-0.538077
	8.9776	-4.03812	-3.75821	-4.91164	-3.89679	-4.85129	-4.66438	-4.85662	-4.87018	-4.80291	-5.04472	-4.12542	-4.4193	-4.35737	-5.28493	-3.5996	-4.80297	-4.46468	-3.53105	-4.26777	-3.78666	-3.78008	-2.91547	-3.77002	-2.89562	-2.92743	-2.97878	-2.38392	-2.81951	-2.64049	-1.67375	-2.82937	-1.62085	-1.51769	-1.28065	-1.6909	-0.412029	-0.947304	-1.39257	-0.485366	-0.32691	-0.930235	-0.538053	-0.151294	-0.377346	0.189595	-1.01453	0.297535	-0.364483
	9.0391	-4.08277	-3.90266	-5.08662	-3.97715	-4.7635	-4.49398	-4.75658	-4.97833	-4.83626	-4.8248	-4.06016	-4.29382	-4.24463	-5.06703	-3.41165	-4.80989	-4.43008	-3.49379	-4.19701	-3.72109	-3.46988	-2.70702	-3.53891	-2.73392	-2.70861	-2.82643	-2.26817	-2.53725	-2.57948	-1.45989	-2.61052	-1.14781	-1.27504	-1.05011	-1.44086	-0.230461	-0.698708	-1.24672	-0.209412	-0.130729	-0.659412	-0.352073	-0.0566303	-0.34566	0.37449	-0.961368	0.126484	-0.450763
	9.1005	-4.0743	-3.94403	-5.03135	-4.08744	-4.72672	-4.53425	-4.67993	-4.75199	-4.5742	-4.86623	-3.93466	-4.33459	-4.1203	-4.96437	-3.22963	-4.63062	-4.33702	-3.27161	-4.05674	-3.58288	-3.19077	-2.40534	-3.28613	-2.68159	-2.4903	-2.68901	-1.93709	-2.26757	-2.35668	-1.37106	-2.6048	-0.992064	-1.1414	-0.983679	-1.29462	-0.150851	-0.511318	-1.10933	-0.00145188	-0.144425	-0.526918	-0.169095	0.122391	-0.335219	0.416694	-0.899226	0.206673	-0.421112
	9.162	-3.90977	-3.98773	-4.9418	-4.20334	-4.71694	-4.59843	-4.52932	-4.74124	-4.33934	-4.79808	-3.91017	-4.3691	-3.94619	-4.76197	-3.13528	-4.4018	-4.23299	-3.19284	-3.94541	-3.47111	-2.84788	-2.18906	-2.93662	-2.47872	-2.37569	-2.4813	-1.79853	-2.03865	-2.32233	-1.12634	-2.34458	-0.644174	-0.956604	-0.760726	-1.16177	0.0247837	-0.391043	-0.924582	0.261034	-0.132521	-0.276458	-0.0874603	0.207441	-0.212092	0.460225	-0.853346	0.220359	-0.391832
	9.2234	-3.87931	-4.03484	-4.7713	-4.12262	-4.60785	-4.46134	-4.58063	-4.63085	-4.22528	-4.67829	-3.88579	-4.18362	-3.83718	-4.74406	-3.0579	-4.25133	-4.00578	-3.05225	-3.78039	-3.33887	-2.76219	-2.04937	-2.86897	-2.31804	-2.12047	-2.30854	-1.49231	-1.7968	-2.13156	-1.03043	-1.86071	-0.423473	-0.712598	-0.517602	-0.837052	0.23786	-0.166498	-0.694698	0.442581	-0.0594135	-0.19339	0.0805576	0.468361	-0.132398	0.627317	-0.667029	0.134314	-0.253325
	9.2848	-3.99455	-3.99324	-4.78258	-4.24517	-4.50164	-4.57602	-4.51388	-4.55667	-4.07996	-4.56195	-3.84805	-4.26591	-3.63439	-4.59012	-2.90175	-4.07208	-3.81605	-2.88956	-3.70834	-3.23628	-2.65828	-1.82079	-2.6367	-2.14423	-1.9479	-2.09399	-1.15875	-1.61843	-1.85785	-0.982433	-1.88641	-0.0322937	-0.533413	-0.355939	-0.691798	0.292938	-0.0199112	-0.645236	0.651925	0.075816	-0.0622074	0.203526	0.460166	-0.0127491	0.705669	-0.70709	0.21971	-0.28295
	9.3463	-3.93317	-3.99436	-4.70797	-4.2527	-4.41969	-4.52915	-4.31599	-4.49757	-3.83566	-4.30417	-3.55769	-4.08351	-3.47214	-4.49812	-2.63875	-3.90083	-3.65984	-2.7077	-3.38551	-3.22832	-2.47175	-1.57677	-2.38577	-1.94555	-1.74782	-1.92504	-1.01484	-1.55797	-1.68701	-0.963994	-1.62388	0.239221	-0.3941	-0.319106	-0.493416	0.310839	0.417337	-0.623401	0.80107	0.244323	0.0434147	0.253519	0.416238	0.145856	0.673301	-0.581765	0.143202	-0.0975735
	9.4077	-3.96566	-3.82464	-4.71899	-4.2746	-4.29249	-4.38452	-4.33251	-4.33411	-3.70576	-4.15455	-3.42313	-3.95598	-3.11757	-4.32602	-2.45992	-3.6281	-3.41021	-2.62207	-3.36236	-3.06432	-2.30003	-1.51446	-2.16745	-1.75385	-1.66502	-1.94047	-0.872522	-1.30013	-1.52563	-0.778693	-1.46023	0.559171	-0.235736	-0.0944816	-0.245951	0.449878	0.643932	-0.426112	0.807852	0.0767098	-0.0519375	0.168685	0.366041	0.218222	0.720008	-0.403616	0.186108	-0.0674637
	9.4692	-4.25269	-3.94899	-4.71973	-4.10731	-4.32632	-4.30056	-4.17826	-4.28782	-3.63792	-4.03458	-3.31199	-3.87705	-2.99524	-4.2668	-2.28633	-3.43279	-3.19819	-2.36402	-3.15439	-2.98311	-2.16854	-1.48446	-1.87251	-1.54011	-1.50134	-1.73288	-0.650881	-1.21696	-1.3485	-0.787166	-1.1175	0.704832	0.0228714	0.0868618	-0.00133125	0.226402	0.814463	-0.307396	0.877607	0.199398	0.0695988	0.224516	0.29078	0.250191	0.603661	-0.365509	0.206593	-0.025853
	9.5306	-4.17867	-3.87521	-4.77567	-4.07594	-4.20912	-4.35865	-4.22987	-4.18405	-3.6831	-3.81122	-3.20574	-3.55511	-2.84331	-4.13039	-2.26887	-3.15999	-2.9725	-2.27449	-2.91264	-2.82973	-1.92555	-1.31801	-1.67828	-1.27142	-1.41592	-1.68835	-0.507548	-0.920447	-1.12955	-0.757273	-0.937117	0.847192	0.156413	0.19346	0.0291642	0.135946	1.02831	-0.287991	0.799547	0.267238	-0.0297436	0.0217297	0.28343	0.286642	0.705345	-0.365931	0.143418	0.0845734
	9.592	-4.23069	-3.7914	-4.67379	-4.01453	-4.21103	-4.22792	-4.03259	-4.10713	-3.46012	-3.61253	-3.00974	-3.39803	-2.71426	-4.03953	-2.17927	-2.7844	-2.76284	-2.11466	-2.77093	-2.75219	-1.79318	-1.11276	-1.51758	-1.05883	-1.20172	-1.44074	-0.283306	-0.790071	-0.906839	-0.521063	-0.653259	1.18757	0.348846	0.305617	0.0470867	0.0580238	1.18729	-0.144309	0.883589	0.285104	0.00610048	-0.0261669	0.218221	0.431843	0.64759	-0.373921	0.0917862	0.118336
	9.6535	-4.25572	-3.75556	-4.56599	-3.85739	-4.06932	-4.06866	-4.04298	-4.04063	-3.40085	-3.53218	-2.82998	-3.1599	-2.38979	-3.84597	-2.03106	-2.68615	-2.60446	-1.90863	-2.67945	-2.53848	-1.63247	-1.09398	-1.47739	-0.757627	-1.21336	-1.29003	-0.135728	-0.557239	-0.727575	-0.350325	-0.444083	1.39356	0.364187	0.459056	0.15223	-0.0810676	1.26377	-0.132584	0.792569	0.310737	0.140442	-0.0744938	0.227501	0.531728	0.54188	-0.281636	0.0585838	0.00880965
	9.7149	-4.3764	-3.75959	-4.61045	-3.76857	-3.95769	-3.93068	-3.95111	-3.97048	-3.27804	-3.47254	-2.74523	-2.92158	-2.31328	-3.67038	-1.82118	-2.51393	-2.331	-1.86791	-2.46563	-2.4219	-1.51615	-0.981626	-1.27789	-0.644103	-0.916236	-1.17919	-0.111641	-0.431615	-0.592469	-0.175349	-0.365338	1.42674	0.581632	0.743556	0.166129	-0.0965855	1.36849	-0.131445	0.748946	0.357094	0.193511	-0.144207	0.102613	0.502385	0.65023	-0.308518	-0.157692	0.09673
	9.7764	-4.40635	-3.56197	-4.40705	-3.66532	-3.84561	-3.9017	-3.86924	-3.88299	-3.14328	-3.4168	-2.61491	-2.69934	-2.07076	-3.56368	-1.6298	-2.24401	-2.0155	-1.84252	-2.21212	-2.20511	-1.33964	-0.800241	-1.31799	-0.225964	-0.831529	-1.05161	0.0362057	-0.0830738	-0.357586	0.00547597	-0.209713	1.23357	0.622168	0.666557	0.116901	-0.276649	1.37967	-0.137846	0.582966	0.316003	0.298925	-0.0433254	0.0983112	0.664012	0.466209	-0.190812	-0.266917	0.0149166
	9.8378	-4.29	-3.40211	-4.3784	-3.46025	-3.74444	-3.59063	-3.83184	-3.68008	-2.93564	-3.31958	-2.30868	-2.51107	-2.00944	-3.44663	-1.43586	-2.12148	-1.7364	-1.80103	-2.13052	-2.03541	-1.20677	-0.526197	-1.10851	0.00452004	-0.63738	-0.95798	0.0305626	0.0659115	-0.337368	0.10507	-0.151645	1.31852	0.637857	0.74556	0.0553215	-0.307661	1.35912	-0.276762	0.343761	0.375306	0.276907	-0.00773466	0.159925	0.562381	0.43258	-0.194915	-0.312677	-0.0731979
	9.8992	-4.33381	-3.30802	-4.21312	-3.29861	-3.49621	-3.48539	-3.71912	-3.6392	-2.85981	-3.21929	-2.05266	-2.54753	-1.84232	-3.23156	-1.25738	-2.01118	-1.57842	-1.76486	-1.75106	-1.76439	-1.00339	-0.420762	-0.928409	0.224195	-0.419486	-0.813192	0.135784	0.355104	-0.120195	0.478712	-0.0403568	1.23826	0.682775	0.779036	0.067469	-0.460356	1.23885	-0.283817	0.213959	0.413699	0.374081	-0.144873	0.11212	0.462122	0.48063	-0.202065	-0.383776	-0.0119312
	9.9607	-4.25661	-3.22102	-4.05595	-2.946	-3.36519	-3.3726	-3.50668	-3.60489	-2.73737	-2.971	-1.81641	-2.36723	-1.83653	-3.02131	-1.05877	-1.93594	-1.43269	-1.6203	-1.63541	-1.59206	-0.893374	-0.291529	-0.576093	0.443258	-0.276446	-0.71437	0.104617	0.523064	-0.0068165	0.469879	-0.0187932	1.12448	0.662205	0.734152	-0.0781627	-0.503624	1.27147	-0.295916	-0.0724591	0.382176	0.349465	-0.0265205	-0.0822315	0.407897	0.46625	-0.120496	-0.546221	-0.0727943
	10.0221	-4.17728	-3.05157	-3.75708	-2.8142	-3.14517	-3.1875	-3.47466	-3.47021	-2.57792	-2.98064	-1.59638	-2.22522	-1.76808	-2.80052	-0.952121	-1.6836	-1.05497	-1.49788	-1.44376	-1.42675	-0.732828	-0.149284	-0.499675	0.500019	-0.18552	-0.553296	0.176789	0.528062	0.170319	0.357058	-0.0458473	1.02789	0.736792	0.716254	-0.161013	-0.702283	1.05822	-0.310199	-0.172133	0.418052	0.472017	-0.0535202	-0.104421	0.356178	0.433559	-0.0923527	-0.46023	-0.0228729
	10.0836	-4.1229	-2.99754	-3.64821	-2.60458	-2.91326	-3.00723	-3.28802	-3.24247	-2.31038	-2.73506	-1.32495	-2.07422	-1.63087	-2.54876	-0.887407	-1.5376	-0.678061	-1.31208	-1.35065	-1.26346	-0.583035	-0.0173355	-0.213651	0.605631	-0.055883	-0.395758	0.0405071	0.514984	0.165197	0.421156	-0.0259735	0.997952	0.619692	0.734905	-0.316963	-0.757273	0.925196	-0.243661	-0.37597	0.28881	0.359058	-0.159784	-0.213232	0.298465	0.393142	-0.00452425	-0.669841	-0.0759716
	10.145	-3.77034	-2.81741	-3.45758	-2.35961	-2.77547	-2.69951	-3.11102	-3.14726	-2.28358	-2.65956	-1.0263	-2.05971	-1.55972	-2.34827	-0.689135	-1.31912	-0.305634	-1.127	-1.23521	-1.12242	-0.445513	0.0934379	-0.22657	0.653003	0.188759	-0.32878	0.184821	0.544493	0.309545	0.136804	-0.0946163	0.992558	0.63337	0.639301	-0.476102	-0.815084	0.738588	-0.270679	-0.400533	0.25818	0.480195	-0.291289	-0.176573	0.21026	0.330225	-0.00463024	-0.59653	-0.115563
	10.2064	-3.55871	-2.81256	-3.30911	-2.13912	-2.72652	-2.32141	-2.81094	-3.25202	-2.03987	-2.45872	-0.734613	-2.04778	-1.33306	-2.21961	-0.636673	-1.15866	-0.137126	-0.935296	-1.03778	-0.88658	-0.37178	0.171325	-0.0786564	0.622071	0.262897	-0.240052	0.196614	0.465071	0.214643	0.164199	-0.217431	0.966225	0.532199	0.490871	-0.454511	-0.952004	0.625584	-0.247437	-0.499969	0.218849	0.553542	-0.395435	-0.352089	0.109877	0.327057	0.0165104	-0.695111	-0.23239
	10.2679	-3.26683	-2.67205	-3.10939	-1.79774	-2.52747	-2.06664	-2.65961	-3.00466	-2.05473	-2.12984	-0.551283	-1.97419	-1.19168	-2.00143	-0.609796	-0.980905	0.0376122	-0.778668	-0.909251	-0.753685	-0.341301	0.251488	0.0322075	0.770567	0.440978	-0.271183	0.060479	0.466607	0.175008	-0.0758621	-0.210165	0.890187	0.495639	0.525942	-0.677646	-1.00305	0.431058	-0.368964	-0.587344	0.236656	0.475563	-0.388969	-0.314133	0.0244984	0.348928	-0.224007	-0.61325	-0.199365
	10.3293	-3.20119	-2.6018	-2.8645	-1.78652	-2.38909	-1.79124	-2.50648	-2.85805	-1.86481	-2.03616	-0.401881	-1.81677	-0.971117	-1.76059	-0.540366	-0.845797	0.273401	-0.55979	-0.780899	-0.608725	-0.335504	0.331604	0.0678898	0.730204	0.563205	-0.120708	0.177878	0.287257	0.0784821	-0.208006	-0.465478	0.766062	0.3283	0.310704	-0.654135	-1.01137	0.371258	-0.332293	-0.680267	0.318437	0.521761	-0.406474	-0.501068	-0.0896103	0.241139	-0.251876	-0.591361	-0.224502
	10.3908	-3.05225	-2.58103	-2.71527	-1.41406	-2.18815	-1.41327	-2.40984	-2.68496	-1.80311	-1.82058	-0.228927	-1.73967	-0.781041	-1.61531	-0.487196	-0.733266	0.438682	-0.3557	-0.760074	-0.415953	-0.210738	0.19456	0.155544	0.825399	0.594156	-0.0348801	0.113403	0.25981	0.1111	-0.366829	-0.438539	0.673043	0.278189	0.299666	-0.814149	-0.958004	0.21677	-0.350533	-0.739418	0.37068	0.529526	-0.458351	-0.466005	-0.127364	0.217492	-0.0646152	-0.542861	-0.352937
	10.4522	-2.92495	-2.47115	-2.57346	-1.20706	-2.022	-1.05972	-2.24149	-2.58695	-1.59273	-1.58772	0.0475479	-1.55399	-0.570684	-1.50284	-0.428873	-0.496322	0.475789	-0.236791	-0.727219	-0.19465	-0.285075	0.325619	0.20796	0.726877	0.658128	-0.0845902	0.133175	0.200466	-0.0463623	-0.460738	-0.514426	0.551785	0.106976	0.269956	-0.85684	-0.867198	0.0644791	-0.260917	-0.828043	0.434221	0.499927	-0.554177	-0.506619	-0.223735	0.0188297	-0.249033	-0.582531	-0.413694
	10.5136	-2.774	-2.3587	-2.47895	-1.07717	-1.68693	-0.673003	-2.08414	-2.55969	-1.50665	-1.43987	0.157202	-1.30663	-0.336267	-1.31607	-0.350952	-0.375634	0.313166	-0.00548743	-0.560769	-0.100348	-0.319317	0.20116	0.138383	0.716156	0.678716	0.00285454	0.0949615	0.131719	-0.153984	-0.504939	-0.454265	0.508713	0.162516	0.247907	-0.832536	-0.793867	0.108566	-0.246073	-0.892089	0.591138	0.468945	-0.604739	-0.601514	-0.391708	-0.0555954	-0.029422	-0.507177	-0.443118
	10.5751	-2.54265	-2.09614	-2.39517	-0.852954	-1.53794	-0.2942	-1.93428	-2.28029	-1.41753	-1.38829	0.302538	-1.08036	-0.285893	-1.11354	-0.262808	-0.271943	0.210273	-0.0650162	-0.533607	-0.0699883	-0.473781	0.252443	0.109761	0.745281	0.737719	-0.0892235	-0.0285892	-0.0102158	-0.2375	-0.718843	-0.437259	0.421143	0.125359	0.147612	-0.841041	-0.598167	0.0275673	-0.299915	-0.778975	0.609994	0.541349	-0.62448	-0.765114	-0.349138	0.0647583	-0.0913643	-0.549134	-0.448896
	10.6365	-2.3038	-1.92371	-2.37383	-0.738761	-1.20107	-0.0757553	-1.71435	-2.06582	-1.41289	-1.05794	0.459298	-0.893093	-0.127353	-1.09991	-0.20977	-0.160673	0.16406	0.123571	-0.424315	-0.103739	-0.517003	0.183832	0.07057	0.671288	0.613347	-0.138932	-0.209199	-0.0225609	-0.3576	-0.71835	-0.544143	0.185178	-0.00994758	0.0984081	-0.657567	-0.557139	-0.0789932	-0.373423	-0.658455	0.670123	0.434059	-0.691515	-0.624127	-0.506049	0.0158821	-0.294009	-0.477945	-0.583646
	10.698	-2.19261	-1.73364	-2.13882	-0.448882	-0.981331	0.255099	-1.51899	-1.83772	-1.16401	-0.895356	0.637141	-0.678608	0.0460533	-0.873384	-0.132394	-0.0696945	-0.0979797	0.330123	-0.442583	-0.0884731	-0.595326	0.20004	-0.155114	0.646697	0.617332	-0.0744423	-0.151402	-0.0805729	-0.406657	-0.646214	-0.599462	0.218824	-0.191465	0.177402	-0.752732	-0.536216	-0.205878	-0.189137	-0.677532	0.746825	0.361779	-0.534647	-0.408894	-0.655359	0.0449047	-0.201738	-0.455856	-0.507584
	10.7594	-1.87572	-1.51725	-2.0183	-0.0172249	-0.641852	0.513261	-1.40511	-1.73811	-1.1794	-0.752213	0.673043	-0.453035	-0.0100342	-0.785764	-0.0672478	0.00318069	-0.22669	0.410662	-0.426302	-0.212186	-0.65317	-0.0438419	-0.190205	0.353955	0.528809	-0.152811	-0.28472	-0.0280434	-0.402725	-0.70912	-0.494267	0.229672	-0.153938	0.102905	-0.628671	-0.528171	-0.146695	-0.203259	-0.733627	0.820598	0.380013	-0.542706	-0.408506	-0.552275	0.0015701	-0.210574	-0.340629	-0.481739
	10.8208	-1.86998	-1.19009	-1.79143	0.195639	-0.559707	0.779819	-1.2042	-1.56116	-0.9656	-0.596018	0.609866	-0.1719	0.0378964	-0.649648	0.0912922	0.0051029	-0.415618	0.478656	-0.412648	-0.208758	-0.775562	-0.119459	-0.442748	0.27279	0.531648	-0.197236	-0.291734	0.0271538	-0.353975	-0.632008	-0.500211	0.199435	-0.309425	0.156502	-0.654468	-0.425077	-0.21696	-0.101429	-0.711698	0.75989	0.327102	-0.391143	-0.180492	-0.622946	-0.0683125	-0.354315	-0.284092	-0.603369
	10.8823	-1.48641	-1.08226	-1.76695	0.522972	-0.187066	0.920285	-1.01486	-1.35832	-0.98729	-0.537009	0.773525	0.111407	-0.054932	-0.602894	0.0232033	-0.165718	-0.598577	0.425167	-0.248613	-0.276015	-0.892192	-0.274479	-0.512571	0.143771	0.510594	-0.290907	-0.237466	0.00526201	-0.398945	-0.578502	-0.585078	0.0915516	-0.246959	0.0800144	-0.561208	-0.287307	-0.167123	-0.0396607	-0.675476	0.69945	0.185112	-0.438449	-0.0527847	-0.647757	-0.0396084	-0.293802	-0.309682	-0.562108
	10.9437	-1.24221	-0.832748	-1.55174	0.714116	-0.0952377	0.965721	-0.880175	-1.18031	-0.972027	-0.337146	0.766151	0.307954	0.129519	-0.612595	0.0949406	-0.0412941	-0.609304	0.378231	-0.25034	-0.457804	-0.967835	-0.378267	-0.748868	0.0651081	0.457981	-0.358361	-0.288744	0.172746	-0.366393	-0.442933	-0.434731	0.0376484	-0.322606	0.22316	-0.526131	-0.220554	-0.260128	0.0647865	-0.605637	0.874226	0.135192	-0.337724	0.0693821	-0.68976	-0.0640243	-0.322742	-0.374921	-0.5576
[truncated: 12 more columns]

## Sheet: panel C
	Non-principal LSO cell
	ITD (ms)	Spikes/click
		mean	s.e.m.			ITD (ms)	Spikes/click
	-2	1	0		80% of maximum:
	-1.8	1	0			1.53	1.36
	-1.6	1	0		20% of maximum:	-0.227	0.3405
	-1.4	1.1	0.1			0.919	0.338
	-1.2	1.3	0.1528
	-1	1.1	0.1		ITDs halfwidth:	-0.66
	-0.8	1.2	0.1333			1.174
	-0.6	0.7	0.2603
	-0.4	0.6	0.1633
	-0.2	0.3	0.1528
	0	0.2	0.1333
	0.2	0	0
	0.4	0.2	0.1333
	0.6	0	0
	0.8	0.1	0.1
	1	0.5	0.1667
	1.2	0.9	0.1
	1.4	1.1	0.1
	1.6	1.5	0.1667
	1.8	1.7	0.1528
	2	1.3	0.1528

## Sheet: panel D
	ITD (ms):	-2	-1.8	-1.6	-1.4	-1.2	-1	-0.8	-0.6	-0.4	-0.2	-1.19209e-07	0.2	0.4	0.6	0.8	1	1.2	1.4	1.6	1.8	2
	Time (ms)	Vm rel (mV)	Vm rel (mV)	Vm rel (mV)	Vm rel (mV)	Vm rel (mV)	Vm rel (mV)	Vm rel (mV)	Vm rel (mV)	Vm rel (mV)	Vm rel (mV)	Vm rel (mV)	Vm rel (mV)	Vm rel (mV)	Vm rel (mV)	Vm rel (mV)	Vm rel (mV)	Vm rel (mV)	Vm rel (mV)	Vm rel (mV)	Vm rel (mV)	Vm rel (mV)
	4.001	0.541555	-0.784592	-0.424847	-0.218191	0.413495	-0.258557	0.0401287	-0.379716	-0.2301	0.316194	0.908054	-0.0707157	-1.46682	-5.55334	-9.56972	-11.3756	-12.1634	-12.1775	-12.3921	-12.3916	-11.3232
	4.0624	0.463575	-0.785941	-0.514898	-0.186492	0.454251	-0.284522	-0.00574722	-0.457531	-0.275936	0.443814	0.63145	-0.38436	-2.52919	-6.9164	-10.3724	-11.7655	-12.259	-12.2509	-12.2382	-12.2076	-11.2573
	4.1239	0.55165	-0.895801	-0.502425	-0.209562	0.371387	-0.343192	-0.0130455	-0.57497	-0.263665	0.655654	0.468097	-0.515887	-4.16342	-8.22054	-11.0328	-12.0169	-12.4134	-12.2363	-11.9812	-11.9533	-11.2798
	4.1853	0.569347	-0.804081	-0.46586	-0.150577	0.406688	-0.331887	0.0285603	-0.514956	-0.306945	0.66867	0.333182	-1.08398	-5.70541	-9.52089	-11.6008	-12.2174	-12.4887	-12.0386	-11.8588	-11.7225	-11.2748
	4.2467	0.616109	-0.777029	-0.454316	-0.0694645	0.496057	-0.25763	0.0829868	-0.384845	-0.1536	0.577079	0.357366	-2.00018	-7.08593	-10.4154	-12.0202	-12.2974	-12.4702	-11.8734	-11.5935	-11.5066	-11.3519
	4.3082	0.586243	-0.728449	-0.446988	0.00485383	0.392581	-0.336391	0.133455	-0.12495	-0.0827701	0.497198	0.195883	-3.20637	-8.30866	-11.0691	-12.2821	-12.3765	-12.3866	-11.6487	-11.3352	-11.2808	-11.4611
	4.3696	0.624252	-0.558354	-0.462103	-0.0244041	0.420692	-0.215419	0.0331387	-0.0253666	0.125372	0.463761	-0.215398	-4.74344	-9.45602	-11.6735	-12.4207	-12.4945	-12.308	-11.4704	-11.0602	-10.9709	-11.4404
	4.4311	0.67098	-0.562481	-0.467313	0.15555	0.503091	-0.243943	0.114746	0.187091	0.0924057	0.326102	-1.35481	-6.19121	-10.2963	-12.1313	-12.5675	-12.4658	-12.0803	-11.6093	-10.8166	-10.9221	-11.4767
	4.4925	0.87356	-0.535478	-0.363854	0.345959	0.630778	-0.0692207	0.262193	0.230187	-0.050219	0.216654	-2.57151	-7.51951	-10.921	-12.4199	-12.4773	-12.3016	-11.918	-11.2072	-10.5682	-10.7299	-11.4056
	4.5539	1.22643	-0.263324	0.0127026	0.492267	0.810969	0.0896443	0.486791	0.348243	-0.0602928	0.0381424	-4.06875	-8.55272	-11.3206	-12.5488	-12.2699	-12.0948	-11.517	-10.8135	-10.2597	-10.5867	-11.2886
	4.6154	1.59403	0.0528141	0.369709	0.910466	1.07253	0.530527	0.907603	0.580236	0.166289	-0.5428	-5.30601	-9.43842	-11.5687	-12.375	-11.6869	-11.6567	-11.0175	-10.1541	-9.67152	-10.1168	-11.0009
	4.6768	2.2559	0.730975	0.987121	1.46283	1.44352	1.11884	1.72854	0.864567	0.651444	-1.35516	-6.36963	-9.92396	-11.505	-11.9736	-11.0573	-11.0073	-10.2595	-9.4608	-9.1781	-9.77257	-10.4841
	4.7383	2.97865	1.63243	1.84111	2.19516	2.38542	2.0967	2.65208	1.46278	1.08767	-2.4509	-7.05386	-9.94187	-11.167	-11.3126	-10.0881	-10.071	-9.34055	-8.55251	-8.46526	-9.07212	-9.68183
	4.7997	3.94703	2.79767	2.99855	3.35696	3.50619	3.31599	3.70693	2.37981	1.28044	-3.48052	-7.51599	-9.7633	-10.7486	-10.3809	-8.9934	-8.90038	-8.27742	-7.74991	-7.57504	-8.30229	-8.70856
	4.8611	5.50222	4.58735	4.91677	5.07113	5.22214	5.26469	5.00993	3.74249	1.07797	-4.46674	-7.67425	-9.30155	-9.95577	-9.37143	-7.63954	-7.52816	-7.08957	-6.87458	-6.55523	-7.29021	-7.6866
	4.9226	8.35954	7.25129	8.0832	8.06799	8.08323	8.29189	7.1397	5.60675	0.633985	-5.25181	-7.75214	-8.81214	-9.26396	-8.23716	-6.36233	-6.07474	-5.6657	-5.96776	-5.57635	-6.41394	-6.41063
	4.984	13.6312	10.9491	12.9681	14.0328	12.4469	12.9856	10.1238	7.37872	-0.0293133	-5.84983	-7.55259	-8.33841	-8.32555	-7.03556	-5.07414	-4.70251	-4.19819	-5.0389	-4.45156	-5.38894	-5.01628
	5.0455	22.9918	18.2704	21.8186	23.326	19.6834	21.094	14.8218	8.37987	-0.964198	-6.36352	-7.31911	-7.72645	-7.33542	-5.82017	-3.54239	-3.19007	-2.43689	-4.13717	-3.09496	-4.38879	-3.18851
	5.1069	35.6759	31.2943	34.324	35.8212	31.8319	32.3723	24.6211	8.3107	-2.43958	-6.63603	-7.07773	-7.08868	-6.40425	-4.61007	-1.5756	-1.45726	-0.483538	-2.91878	-1.50656	-2.92669	-1.14672
	5.1683	44.237	42.9869	43.7999	44.2813	43.0852	41.6243	36.9959	8.2311	-4.07382	-6.93701	-6.77139	-6.51544	-5.51654	-3.46592	0.276126	0.00377579	0.889448	-1.70081	-0.202129	-1.04888	0.270968
	5.2298	44.2496	45.3543	44.2844	43.6513	45.7159	43.186	43.2726	9.08971	-5.75432	-7.05307	-6.58196	-6.02494	-4.68865	-1.80778	0.782855	0.272422	0.729178	-1.1755	0.517529	0.177037	0.615122
	5.2912	37.6063	39.6141	37.6229	36.6158	40.2126	37.49	40.907	10.4951	-7.12951	-7.03979	-6.42485	-5.57274	-3.74526	-0.326821	0.23964	-0.179517	-0.206409	-1.29124	0.459859	0.619736	1.09125
	5.3527	28.6201	30.3402	28.3906	27.5794	31.1032	28.4829	33.0117	10.7508	-7.87619	-7.17301	-6.11223	-5.16088	-2.67168	0.0270615	-0.818071	-1.16122	-0.881426	-1.64151	0.468832	0.671215	1.90111
	5.4141	20.5878	21.5679	20.2446	19.424	22.4343	19.6365	23.5232	9.68901	-8.23083	-7.34203	-5.85415	-4.83582	-1.44162	-0.467872	-1.56345	-1.9243	-0.792825	-1.67513	1.79156	0.698197	3.607
	5.4755	14.6814	14.9597	14.5358	13.6046	15.7298	12.5665	15.0886	7.40129	-8.54713	-7.2699	-5.51274	-4.52951	-0.87119	-1.16994	-1.76851	-2.38393	-0.153386	-0.662234	4.6665	1.65056	4.82826
	5.537	10.9862	10.8224	10.8811	9.82329	10.9234	7.27432	8.77326	4.38613	-8.60328	-7.34099	-5.02903	-3.90172	-0.854597	-1.66424	-1.47745	-2.16759	0.970324	1.22655	8.0077	4.68544	5.20459
	5.5984	9.01363	8.59322	8.72565	7.48033	7.60828	3.63958	4.40606	1.3752	-8.65846	-7.40242	-4.83236	-3.39753	-1.14435	-2.0894	-0.844802	-2.05843	2.76767	2.64979	10.3982	10.0356	5.01242
	5.6599	7.96244	7.30561	7.2264	6.02616	5.05301	0.699676	1.31774	-1.17974	-8.60144	-7.26942	-4.78876	-3.19861	-1.43443	-2.35638	0.432673	-1.71734	5.26813	2.96134	11.9083	16.7838	4.54588
	5.7213	7.40048	6.76837	6.25808	4.80432	2.87422	-1.64132	-1.07767	-3.21269	-8.61801	-7.29484	-4.67339	-3.01502	-1.79121	-2.64921	1.47386	-1.67045	8.42724	2.48919	13.9245	22.3509	4.14398
	5.7827	7.25538	6.52186	5.72055	3.57683	0.672699	-3.31453	-2.71466	-4.5742	-8.69192	-7.31249	-4.64612	-3.07197	-1.78234	-3.07096	1.4864	-1.41751	10.6172	1.58784	17.4165	25.3344	4.12917
	5.8442	7.38795	6.46982	5.35447	2.02427	-1.19513	-4.8349	-4.03228	-5.64233	-8.66808	-7.23312	-4.62187	-3.14758	-1.72263	-3.42209	0.72021	-1.42852	10.8731	0.759304	20.4154	25.6773	4.64451
	5.9056	7.61862	6.38098	4.9564	0.503255	-2.81629	-5.93188	-5.11889	-6.43852	-8.68423	-7.09811	-4.54815	-3.52327	-1.84392	-3.85812	-0.479516	-1.46236	9.41764	-0.269204	20.5617	24.665	6.20187
	5.9671	7.91119	6.33996	4.49005	-1.29778	-4.19337	-7.00004	-5.89143	-7.12008	-8.60068	-7.18619	-4.42998	-3.79367	-2.21048	-4.10355	-1.68603	-1.62447	7.32249	-1.14599	18.0906	23.2066	8.5407
	6.0285	7.86942	6.42852	3.35517	-3.04269	-5.30885	-7.67845	-6.72139	-7.60674	-8.61827	-7.09914	-4.50415	-4.10571	-2.59308	-4.51303	-2.6698	-1.72342	5.33261	-1.8316	14.0717	20.363	10.2049
	6.0899	7.70553	6.3877	1.793	-4.48413	-6.37171	-8.409	-7.12698	-7.91802	-8.63301	-7.10605	-4.59162	-4.45595	-3.004	-4.83229	-3.4013	-1.86812	3.67262	-2.42217	10.0008	16.4585	9.705
	6.1514	7.63693	5.92391	-0.089898	-5.8543	-7.29567	-8.80008	-7.66306	-8.22592	-8.61274	-7.1034	-4.86028	-4.91787	-3.4638	-5.1148	-3.97659	-1.90139	2.42915	-2.99609	6.29795	11.9528	8.04397
	6.2128	7.54576	4.91677	-1.91952	-6.9596	-7.98195	-9.17743	-8.01218	-8.48032	-8.57131	-7.24581	-5.14773	-5.19539	-3.88036	-5.3112	-4.37517	-1.94155	1.3244	-3.57717	3.37846	7.75754	5.67175
	6.2743	7.50733	3.27779	-3.73622	-7.88019	-8.70466	-9.57533	-8.37725	-8.78626	-8.62599	-7.42113	-5.42882	-5.58566	-4.11648	-5.59369	-4.72062	-2.10705	0.528578	-4.09199	1.08337	4.36325	3.56849
	6.3357	7.14235	1.21839	-5.32743	-8.74824	-9.13411	-9.85584	-8.55945	-8.88148	-8.46943	-7.61543	-5.83805	-6.08262	-4.38957	-5.64071	-4.82123	-2.24364	-0.000916719	-4.50703	-0.906657	1.82358	1.90383
	6.3971	6.3138	-0.893039	-6.53481	-9.41295	-9.58502	-9.9986	-8.71176	-9.12483	-8.30985	-7.72262	-6.32831	-6.49395	-4.57876	-5.73969	-4.86107	-2.20422	-0.496319	-4.98088	-2.47547	-0.27925	0.694548
	6.4586	4.76262	-2.94672	-7.75697	-9.88395	-9.85372	-10.0899	-8.80984	-9.09086	-8.23514	-7.86303	-6.68597	-6.78812	-4.7398	-5.82598	-4.95762	-2.20674	-1.0057	-5.32679	-3.96828	-1.90107	-0.0511306
	6.52	2.71488	-4.65169	-8.68758	-10.1716	-10.148	-10.1282	-8.7334	-8.96551	-8.14513	-7.9485	-6.91984	-7.12138	-4.75406	-5.83833	-4.92769	-2.23497	-1.41722	-5.69775	-5.10168	-3.04272	-0.848009
	6.5815	0.596336	-6.28925	-9.40842	-10.6012	-10.3108	-10.1972	-8.8109	-8.9542	-8.16367	-8.14653	-7.21695	-7.29687	-4.91096	-5.87894	-4.9474	-2.43806	-1.906	-6.20772	-6.15699	-4.13572	-1.28935
	6.6429	-1.59098	-7.48194	-10.1002	-10.8949	-10.4278	-10.0995	-8.82406	-8.83295	-8.16685	-8.3173	-7.55598	-7.40663	-4.82499	-5.7985	-5.01528	-2.67382	-2.25641	-6.62521	-7.14275	-4.9436	-1.55631
	6.7043	-3.58139	-8.5612	-10.5651	-11.0402	-10.3771	-10.0649	-8.71753	-8.88315	-8.30433	-8.5055	-7.90525	-7.45129	-4.86468	-5.787	-5.00006	-2.93036	-2.64582	-7.08887	-7.95378	-5.55383	-1.72771
	6.7658	-5.23354	-9.1678	-11.0642	-11.2056	-10.3263	-9.99392	-8.82032	-8.80658	-8.47302	-8.77524	-8.02228	-7.45337	-4.73774	-5.72713	-5.01769	-2.93623	-2.97965	-7.30756	-8.47806	-5.95843	-1.73457
	6.8272	-6.5308	-9.82557	-11.3053	-11.1246	-10.1872	-9.96769	-8.48513	-8.72224	-8.51709	-8.7937	-8.12034	-7.32295	-4.57543	-5.57394	-5.09027	-2.944	-3.15256	-7.4549	-8.77999	-6.24048	-1.7504
	6.8887	-7.67749	-10.3963	-11.2652	-11.0752	-10.0474	-9.75033	-8.56911	-8.70638	-8.53462	-8.70636	-8.00047	-7.16949	-4.33144	-5.42794	-5.1687	-2.78819	-3.32803	-7.52544	-9.08332	-6.35129	-1.54498
	6.9501	-8.41576	-10.6976	-11.2439	-10.7832	-9.83792	-9.52999	-8.57189	-8.59224	-8.34842	-8.50784	-7.74503	-6.90153	-4.08968	-5.24643	-5.22787	-2.7796	-3.50741	-7.43322	-9.27199	-6.2925	-1.3794
	7.0116	-8.96691	-10.7699	-11.0159	-10.5149	-9.22002	-9.18849	-8.46983	-8.36188	-8.00229	-8.24421	-7.45998	-6.40526	-3.81914	-4.96838	-5.1789	-2.85855	-3.47516	-7.34099	-9.32245	-5.96151	-0.96444
	7.073	-9.17946	-10.7543	-10.6003	-9.91204	-8.56164	-8.75632	-8.23411	-8.04208	-7.39888	-7.8894	-6.82053	-5.9019	-3.63625	-4.79488	-5.20935	-2.72647	-3.39535	-6.835	-9.03628	-5.66459	-0.423145
	7.1344	-9.31005	-10.42	-10.1031	-9.24232	-7.82056	-8.1772	-7.98257	-7.46879	-6.7974	-7.36651	-6.15325	-5.18397	-3.19334	-4.47009	-5.19096	-2.59432	-3.05153	-6.26223	-8.55742	-5.0541	0.166496
	7.1959	-9.21987	-10.0031	-9.27496	-8.40396	-6.75775	-7.70312	-7.63553	-6.82584	-6.02538	-6.48767	-5.22871	-4.28625	-2.65833	-4.11326	-5.14783	-2.56702	-2.55249	-5.5362	-7.93247	-4.33243	1.09961
	7.2573	-9.00652	-9.39649	-8.5037	-7.44993	-5.71441	-6.98514	-7.07218	-6.00632	-5.17013	-5.63463	-4.2678	-3.37267	-1.84778	-3.60826	-5.18319	-2.44233	-1.87213	-4.69096	-7.20633	-3.47503	2.18207
	7.3188	-8.68298	-8.55504	-7.48753	-6.41368	-4.68004	-6.33279	-6.49317	-4.92534	-4.21388	-4.60104	-3.11679	-2.34237	-1.01494	-3.065	-5.44068	-2.2744	-0.993004	-3.80286	-6.24117	-2.54059	3.35781
	7.3802	-8.25257	-7.75024	-6.575	-5.41235	-3.80633	-5.90844	-5.90775	-3.89469	-3.19675	-3.55265	-2.03939	-1.28236	-0.120532	-2.65342	-5.58499	-1.96663	-0.0770134	-2.86631	-5.14597	-1.52489	4.96196
	7.4416	-7.81516	-7.01231	-5.43645	-4.40151	-2.87623	-5.36304	-5.23456	-2.86705	-2.07979	-2.45536	-0.849549	-0.21703	0.584699	-2.29575	-5.65575	-1.76749	0.983244	-1.77682	-4.22239	-0.50998	7.26908
	7.5031	-7.39523	-6.10661	-4.51035	-3.24997	-2.0723	-4.7736	-4.54073	-1.83123	-0.819337	-1.41458	0.485411	0.931023	1.13178	-2.23115	-5.69898	-1.36997	2.70211	-0.375431	-3.18322	0.950809	11.5159
	7.5645	-6.94362	-5.37327	-3.48013	-1.71395	-1.45527	-4.33891	-3.59699	-0.632474	0.407407	-0.0199272	2.15041	2.15683	1.57424	-2.20895	-5.55002	-0.528626	5.45409	1.00549	-1.74497	2.96647	19.1143
	7.626	-6.46311	-4.5835	-2.51825	-0.576914	-0.852103	-3.52611	-2.43117	0.814605	1.58169	1.44319	4.05639	2.34628	2.26503	-2.2345	-5.4795	0.114474	9.13237	2.95826	-0.115926	5.34333	28.5108
	7.6874	-6.09511	-3.80923	-1.83339	-0.149863	-0.0174912	-2.64214	-1.36374	2.21279	2.45725	2.29236	6.18004	2.19566	3.69121	-2.12568	-5.24158	1.05466	13.1087	5.62807	1.19931	7.90962	35.5103
	7.7488	-5.6944	-3.21525	-1.12196	-0.737953	0.5841	-1.41855	-0.968057	2.71015	3.33314	2.25837	7.33124	1.46805	5.98533	-2.07166	-4.66078	1.67616	16.5789	8.85158	1.58039	10.4189	37.041
	7.8103	-5.06672	-2.96422	-0.501858	-1.81358	0.916058	-0.857843	-0.676489	3.34563	5.10173	1.80116	7.22796	0.506334	7.79721	-2.06422	-4.16039	2.69965	18.4621	13.9253	1.59791	12.3951	33.9231
	7.8717	-4.53908	-2.87945	-0.224501	-2.68908	0.797363	-1.05725	-0.486754	4.82515	8.03154	2.54771	6.82553	-0.494329	8.60713	-2.38928	-3.99666	4.06434	18.5321	19.8578	2.29865	14.407	29.1008
	7.9332	-4.08327	-3.01784	-0.613058	-3.06495	0.731806	-1.66044	-0.133796	6.92379	12.254	5.21072	6.69667	-1.42349	7.82224	-2.79861	-4.22886	5.59331	18.1108	25.0149	4.96015	15.9945	24.6703
	7.9946	-3.8356	-3.18504	-1.07121	-2.98	1.09593	-2.09743	0.136351	9.61281	16.8991	9.59106	6.37232	-2.0772	5.97197	-3.20735	-4.33577	6.74823	17.3461	29.4191	10.4545	18.0686	21.317
	8.056	-3.77894	-3.49547	-1.75573	-2.58607	2.40897	-2.12463	0.491647	12.3731	18.8715	13.18	5.21736	-2.55672	3.68387	-3.33808	-4.41239	7.9892	17.0688	32.4876	16.7502	19.541	18.3495
	8.1175	-3.86273	-3.84713	-2.43258	-2.02723	5.17277	-1.82987	0.742592	14.1914	17.6089	13.7425	3.37432	-2.99455	1.79343	-3.09327	-4.32261	8.39732	17.1955	31.7349	21.3247	20.4584	15.2736
	8.1789	-4.05882	-4.13165	-2.74159	-1.33918	7.89628	-1.34274	1.08041	14.6258	15.2493	11.7582	1.4683	-3.14583	0.393959	-2.93052	-3.85894	8.02336	16.9791	27.2679	23.6761	21.7016	12.7108
	8.2404	-4.15973	-4.58508	-3.05467	-0.105085	9.06039	-0.804683	1.85617	14.2015	13.2144	8.47136	-0.186384	-3.39645	-0.519607	-2.62427	-3.48829	7.46825	15.6358	21.5187	25.0283	22.3496	10.7134
	8.3018	-4.27666	-4.89824	-3.0498	1.78489	8.54453	0.0289287	3.52747	12.4871	12.4737	5.20407	-1.5629	-3.63021	-1.13813	-2.48251	-3.15531	7.59591	13.488	16.1832	25.7537	21.4533	9.31613
	8.3632	-4.28936	-5.16103	-2.89156	2.91694	6.91853	1.04683	6.53413	9.85722	12.2822	2.73593	-2.56665	-3.85864	-1.52009	-2.38551	-2.81108	9.37062	11.1702	12.3191	25.5524	19.1692	8.52193
	8.4247	-4.66188	-5.35766	-2.87993	2.92508	5.43456	2.75238	8.96192	7.13952	11.3674	0.764159	-3.31242	-4.07472	-1.69976	-2.28177	-2.54332	11.6105	9.21447	9.68909	23.9222	16.6301	8.23553
	8.4861	-4.80128	-5.50905	-2.85656	2.34579	4.85842	3.75621	9.63289	4.55705	9.37983	-0.581073	-3.83367	-4.18346	-1.74708	-2.12136	-2.32026	12.4728	7.75943	8.06097	20.7062	15.0509	8.07498
	8.5476	-5.01646	-5.63626	-2.86414	1.2555	5.16315	3.86988	8.44047	2.36205	6.8813	-1.6353	-4.24459	-4.26303	-1.68739	-1.85386	-2.08754	11.5036	6.8027	6.9962	16.9174	13.8806	8.08449
	8.609	-5.17573	-5.78306	-2.94917	0.348001	5.76271	3.13723	6.23634	0.669825	4.28939	-2.47721	-4.60493	-4.36854	-1.65358	-1.74974	-1.88424	9.70092	6.14552	6.39808	13.2931	12.3337	8.16703
	8.6704	-5.31719	-5.99461	-2.93653	-0.294566	5.62116	1.8531	3.90629	-0.760202	1.9016	-3.06813	-4.8615	-4.26475	-1.46153	-1.58569	-1.6983	7.73936	5.83138	6.20855	10.9553	10.6657	8.21454
	8.7319	-5.28431	-6.29555	-2.93673	-0.860919	4.73813	0.548635	1.82014	-1.86713	0.209325	-3.53686	-4.89653	-4.36739	-1.38647	-1.36468	-1.61383	6.29027	5.48486	6.26791	10.1075	9.01922	8.36879
	8.7933	-5.40124	-6.21434	-2.99296	-1.16166	3.36295	-0.490992	-0.0153119	-3.00581	-1.09367	-3.89894	-4.84405	-4.2777	-1.23126	-1.17213	-1.336	5.34597	5.41404	6.3834	10.4608	7.84201	8.41992
	8.8548	-5.50208	-6.20831	-3.09701	-1.51996	2.0885	-1.46048	-1.53197	-3.80763	-2.04787	-3.9824	-4.87906	-4.31098	-1.15006	-0.998169	-1.20569	4.59499	5.34854	6.48303	10.9438	6.91161	8.58645
	8.9162	-5.61536	-6.10887	-3.2179	-1.61647	0.839146	-2.4782	-2.77632	-4.49741	-2.87155	-4.15071	-4.70455	-4.21232	-1.084	-0.832332	-1.07403	4.29134	5.50548	6.52092	10.562	6.40244	8.70221
	8.9776	-5.66962	-6.11199	-3.36187	-1.74209	-0.0544686	-3.31292	-3.88871	-5.13568	-3.52976	-4.1445	-4.68731	-4.04511	-0.879304	-0.732368	-0.725165	4.16494	5.49304	6.60081	9.66977	6.18772	8.66009
	9.0391	-5.5627	-6.06163	-3.61095	-1.85099	-0.803853	-4.07515	-4.88352	-5.56502	-3.87148	-4.20738	-4.58289	-4.01751	-0.757432	-0.510694	-0.684244	4.22934	5.55021	6.56132	8.54381	5.8539	8.60003
	9.1005	-5.59123	-5.92975	-3.86648	-2.13418	-1.60487	-4.97233	-5.60836	-5.89491	-4.2821	-4.36237	-4.59179	-3.84669	-0.70262	-0.428947	-0.628114	4.28012	5.68525	6.64673	7.63526	5.84432	8.63549
	9.162	-5.4376	-5.96162	-4.20214	-2.39732	-2.52345	-5.682	-6.12787	-6.13772	-4.55013	-4.46989	-4.57365	-3.76799	-0.560389	-0.315176	-0.508574	4.32439	5.76364	6.78328	7.0651	5.82827	8.75406
	9.2234	-5.49788	-6.00344	-4.36156	-2.70633	-3.34765	-6.41692	-6.69097	-6.38684	-4.69225	-4.55415	-4.44631	-3.64693	-0.534759	-0.226471	-0.258777	4.61868	5.77351	7.12439	6.56378	5.94737	8.67946
	9.2848	-5.5183	-5.91566	-4.44514	-3.26757	-4.13683	-6.96278	-7.07402	-6.44518	-4.78739	-4.63501	-4.36091	-3.44287	-0.437736	-0.144228	-0.0378647	5.18857	5.73292	8.12647	5.96132	5.95341	8.57341
	9.3463	-5.54444	-6.04467	-4.83385	-3.85109	-5.02589	-7.47149	-7.2826	-6.39446	-4.80656	-4.53602	-4.2361	-3.25351	-0.38736	0.022485	0.0785004	6.64205	5.66842	9.67634	5.65446	5.89742	8.19121
	9.4077	-5.49061	-6.13936	-5.14878	-4.36267	-5.64472	-7.94194	-7.42568	-6.44575	-4.95693	-4.34109	-4.20267	-3.1829	-0.327716	0.0676193	0.326896	8.05188	5.6598	10.6922	5.47419	5.81681	7.89134
	9.4692	-5.60983	-6.35261	-5.54573	-4.96501	-6.32835	-8.18768	-7.72082	-6.44757	-4.99771	-4.18333	-3.96888	-2.98214	-0.287369	0.0770741	0.387376	8.67767	5.52094	10.5833	5.44491	5.69585	7.59468
	9.5306	-5.62384	-6.71898	-6.13806	-5.61133	-6.99582	-8.40645	-7.71301	-6.36581	-5.02095	-3.99552	-3.81838	-2.73694	-0.244033	0.309079	0.540425	8.24183	5.40661	9.76228	5.25875	5.69948	7.28891
	9.592	-5.63174	-6.80447	-6.61809	-6.19005	-7.37937	-8.52384	-7.81704	-6.51887	-4.98773	-3.92103	-3.69873	-2.57324	-0.223739	0.369936	0.641488	7.19447	5.35754	8.73876	5.21598	5.5586	7.06695
	9.6535	-5.77088	-7.10298	-7.24036	-6.76946	-7.71449	-8.56028	-7.89996	-6.42145	-5.00979	-3.77297	-3.52314	-2.39395	-0.0674644	0.330121	0.709373	6.10979	5.19207	7.8955	5.12353	5.39977	6.88119
	9.7149	-6.12277	-7.44844	-7.84899	-7.25713	-7.96833	-8.65775	-7.78801	-6.29394	-4.87356	-3.79525	-3.28164	-2.44704	-0.101682	0.330741	0.809158	5.24193	5.07111	7.04779	4.97058	5.23709	6.85645
	9.7764	-6.30493	-7.76456	-8.30964	-7.81377	-8.2747	-8.71664	-7.71367	-6.16503	-4.88614	-3.75224	-3.15724	-2.35573	-0.165571	0.356329	0.82879	4.67274	4.88026	6.4956	4.94785	4.94304	6.66392
	9.8378	-6.44953	-8.25627	-8.85143	-8.03318	-8.25978	-8.74414	-7.57085	-6.04934	-4.77984	-3.72813	-3.12035	-2.23131	-0.126642	0.3697	0.82766	4.11943	4.8873	6.157	4.67413	4.67003	6.31716
	9.8992	-6.93378	-8.88487	-9.31032	-8.33845	-8.4798	-8.87116	-7.59719	-5.8557	-4.66642	-3.67981	-3.01275	-2.21865	-0.0720909	0.293103	0.839471	3.79929	4.74186	5.8683	4.69158	4.49093	6.16108
	9.9607	-7.36885	-9.34268	-9.58691	-8.50384	-8.39607	-8.73525	-7.44441	-5.94515	-4.72667	-3.70583	-2.88778	-2.2221	-0.160478	0.460674	0.852538	3.5385	4.53381	5.47377	4.44462	4.43591	5.95586
	10.0221	-7.73134	-9.92393	-9.94452	-8.61726	-8.46008	-8.66959	-7.39642	-5.77075	-4.51869	-3.82152	-2.75093	-2.12461	-0.13872	0.329532	0.95509	3.20891	4.47587	5.25971	4.24707	4.17552	5.65741
	10.0836	-8.18443	-10.17	-10.1243	-8.694	-8.43623	-8.46395	-7.12984	-5.53219	-4.52349	-3.77103	-2.78761	-2.00408	-0.0466168	0.294302	1.09311	3.08074	4.32676	5.08484	4.14557	3.87769	5.46528
	10.145	-8.46352	-10.5809	-10.2904	-8.83332	-8.46132	-8.44598	-7.14521	-5.49345	-4.35461	-3.75874	-2.75042	-1.78876	-0.0384651	0.244407	1.27191	3.05389	4.08747	4.87389	3.92967	3.66818	5.16173
	10.2064	-8.98059	-10.7961	-10.3278	-8.76768	-8.39337	-8.35389	-7.09771	-5.37654	-4.35382	-3.81906	-2.63362	-1.71651	-0.0140201	0.220214	1.16339	3.03848	4.04609	4.70632	3.97964	3.5942	4.69602
	10.2679	-9.33859	-10.919	-10.2491	-8.80221	-8.33893	-8.31832	-6.94464	-5.20294	-4.27981	-3.82586	-2.56054	-1.62429	0.0220455	0.239817	1.12554	3.04798	3.88966	4.55537	3.91169	3.43423	4.49271
	10.3293	-9.61633	-11.0152	-10.2243	-8.83347	-8.28988	-8.06166	-6.73516	-5.27006	-4.14705	-3.75517	-2.39319	-1.54689	0.0785908	0.290226	1.02559	2.95376	3.71157	4.36064	3.77775	3.23491	4.27202
	10.3908	-9.82459	-10.9714	-10.1607	-8.77886	-8.0467	-8.01026	-6.60629	-5.05654	-3.9274	-3.65477	-2.27098	-1.44527	-0.0701466	0.220335	0.970523	2.97486	3.60319	4.1917	3.82096	3.05392	4.09897
	10.4522	-10.0056	-10.9051	-9.99552	-8.62865	-7.98659	-7.82219	-6.48776	-4.95495	-3.74042	-3.51753	-2.22428	-1.31109	-0.210551	0.128614	0.769849	2.88779	3.46194	3.97297	3.58044	2.88266	3.8458
	10.5136	-10.1615	-10.8076	-9.89158	-8.66464	-7.90322	-7.7042	-6.33499	-4.82651	-3.70796	-3.47471	-2.1875	-1.28734	-0.236468	0.00820963	0.772399	2.65071	3.29971	3.86639	3.30551	2.69407	3.62704
	10.5751	-10.2291	-10.6838	-9.81397	-8.50752	-7.81456	-7.45735	-6.12134	-4.66796	-3.60359	-3.43346	-2.0719	-1.11668	-0.327749	0.0381394	0.669712	2.47648	3.1146	3.79264	3.17621	2.59127	3.36097
	10.6365	-10.304	-10.476	-9.70774	-8.52632	-7.7092	-7.41943	-6.06208	-4.46779	-3.54249	-3.2561	-2.116	-1.12523	-0.199624	0.101114	0.529386	2.35746	2.97908	3.53069	2.86941	2.41636	3.35738
	10.698	-10.2667	-10.3844	-9.58422	-8.36075	-7.52227	-7.18595	-5.94015	-4.27959	-3.48824	-3.252	-2.06502	-1.14547	-0.111013	0.149818	0.546288	2.14373	2.89958	3.41142	2.71486	2.29185	3.22113
	10.7594	-10.2317	-10.1637	-9.40472	-8.23283	-7.36699	-7.10089	-5.74357	-4.14064	-3.58266	-3.17262	-1.91683	-1.09016	-0.114798	0.11502	0.495232	2.01109	2.73198	3.28317	2.52639	2.03926	3.0495
	10.8208	-10.0231	-9.96023	-9.32139	-7.93115	-7.20081	-6.9252	-5.63408	-4.02388	-3.44508	-3.16526	-1.9661	-1.09471	-0.0492729	0.0684013	0.568934	1.72488	2.56037	3.06503	2.32023	1.89266	3.00724
	10.8823	-9.94479	-9.74887	-9.08828	-7.87364	-6.92973	-6.72647	-5.50283	-4.00617	-3.38588	-3.09962	-1.97204	-1.05656	-0.0109177	0.0123463	0.555611	1.57533	2.46526	2.92655	2.14205	1.76969	2.87371
	10.9437	-9.76341	-9.7281	-8.7708	-7.77518	-6.86172	-6.62423	-5.39988	-4.01923	-3.17612	-3.06119	-1.8693	-0.969622	-0.0932407	-0.0616734	0.544614	1.41366	2.34876	2.81951	1.98312	1.59946	2.84768

## Sheet: panel E
	MSO cell
	ITD (ms)	Spikes/click
		mean	s.e.m.			ITD (ms)	Spikes/click
	-2	0.5	0.1667		80% of maximum:	-0.32	0.96
	-1.9	0.4	0.1633			0.448	0.96
	-1.8	0.3	0.1528		20% of maximum:	-0.672	0.24
	-1.7	0.4	0.1633
	-1.6	0.3	0.1528
	-1.5	0.5	0.1667		ITDs halfwidth:	-0.467
	-1.4	0.4	0.1633			0.6
	-1.3	0.6	0.1633
	-1.2	0.4	0.1633
	-1.1	0.3	0.1528
	-1	0.1	0.1
	-0.9	0.4	0.1633
	-0.8	0.1	0.1
	-0.7	0.1	0.1
	-0.6	0.6	0.1633
	-0.5	0.5	0.1667
	-0.4	0.8	0.1333
	-0.3	1	0
	-0.2	1	0
	-0.1	1	0
	0	1	0
	0.1	1.2	0.1333
	0.2	1.1	0.1
	0.3	1	0
	0.4	1.2	0.1333
	0.5	0.7	0.1528
	0.6	0.6	0.1633
	0.7	0.5	0.1667
	0.8	0.3	0.1528
	0.9	0.5	0.1667
	1	0.6	0.1633
	1.1	0.3	0.1528
	1.2	0.6	0.1633
	1.3	0.4	0.1633
	1.4	0.5	0.1667
	1.5	0.5	0.1667
	1.6	0.4	0.1633
	1.7	0.4	0.1633
	1.8	0.3	0.1528
	1.9	0.4	0.2211
	2	0.3	0.1528

## Sheet: panel F
	ITD (ms):	-3	-2.9	-2.8	-2.7	-2.6	-2.5	-2.4	-2.3	-2.2	-2.1	-2	-1.9	-1.8	-1.7	-1.6	-1.5	-1.4	-1.3	-1.2	-1.1	-1	-0.9	-0.8	-0.7	-0.6	-0.5	-0.4	-0.3	-0.2	-0.1	-1.78814e-07	0.0999998	0.2	0.3	0.4	0.5	0.6	0.7	0.8	0.9	1	1.1	1.2	1.3	1.4	1.5	1.6	1.7
	Time (ms)	Vm rel (mV)	Vm rel (mV)	Vm rel (mV)	Vm rel (mV)	Vm rel (mV)	Vm rel (mV)	Vm rel (mV)	Vm rel (mV)	Vm rel (mV)	Vm rel (mV)	Vm rel (mV)	Vm rel (mV)	Vm rel (mV)	Vm rel (mV)	Vm rel (mV)	Vm rel (mV)	Vm rel (mV)	Vm rel (mV)	Vm rel (mV)	Vm rel (mV)	Vm rel (mV)	Vm rel (mV)	Vm rel (mV)	Vm rel (mV)	Vm rel (mV)	Vm rel (mV)	Vm rel (mV)	Vm rel (mV)	Vm rel (mV)	Vm rel (mV)	Vm rel (mV)	Vm rel (mV)	Vm rel (mV)	Vm rel (mV)	Vm rel (mV)	Vm rel (mV)	Vm rel (mV)	Vm rel (mV)	Vm rel (mV)	Vm rel (mV)	Vm rel (mV)	Vm rel (mV)	Vm rel (mV)	Vm rel (mV)	Vm rel (mV)	Vm rel (mV)	Vm rel (mV)	Vm rel (mV)
	4.001	0.0318546	0.11696	0.328674	-0.114196	-0.495331	0.171715	-0.188066	0.318542	-0.63028	0.149799	0.0933796	0.116525	-0.273329	-0.107859	0.727915	-0.210698	0.549681	0.072464	-0.110291	-0.0703213	-0.0556103	-0.291705	0.0467445	0.114415	-0.0554314	0.0955082	-0.0522132	0.302576	-0.40268	0.211791	-0.284885	0.30863	0.343247	0.219716	-0.574486	-0.0131405	0.357096	0.287672	-0.101748	0.336098	0.302444	0.734235	0.118154	1.07842	1.08605	0.97444	0.369344	-0.506131
	4.0624	-0.137517	0.18886	0.348103	-0.104612	-0.558834	0.139256	-0.250542	0.163641	-0.573419	0.211674	0.187359	0.17349	-0.291714	-0.0335655	0.744411	-0.101702	0.634511	0.0654881	-0.166684	-0.121133	0.0205067	-0.357717	-0.0123516	0.158121	-0.133489	0.0134396	-0.119234	0.180147	-0.331408	0.28678	-0.250671	0.296858	0.410717	0.212386	-0.651989	-0.0585228	0.251665	0.287797	-0.137824	0.345905	0.173458	0.821809	0.2936	1.21883	1.0798	0.756216	0.196845	-0.741265
	4.1239	-0.133698	0.158733	0.446085	0.0449036	-0.514441	0.194752	-0.195078	0.140479	-0.46521	0.187425	0.147514	0.254946	-0.379911	-0.053138	0.639548	-0.0946395	0.62216	0.127816	-0.154271	-0.0762673	0.139148	-0.351026	-0.0279121	0.125077	-0.175088	0.0920876	-0.038628	0.147541	-0.284453	0.291616	-0.244458	0.386727	0.396516	0.112644	-0.641362	-0.0335549	0.230927	0.243654	-0.1346	0.370946	0.200526	0.843644	0.376213	1.43375	1.11809	0.65587	-0.0961468	-1.1144
	4.1853	-0.232967	0.120226	0.374117	0.0667412	-0.543364	0.219484	-0.120811	0.167476	-0.54273	0.250224	0.179279	0.3884	-0.360448	0.00186042	0.552147	0.0533734	0.610256	0.131847	-0.101732	0.0263019	0.10257	-0.40773	0.0109482	0.0424934	-0.155181	0.10973	-0.198863	0.152742	-0.198727	0.388817	-0.237455	0.423623	0.505342	0.0790344	-0.623932	0.0143295	0.321272	0.200358	-0.0833752	0.409822	0.179257	0.869727	0.551752	1.44228	0.91678	0.423563	-0.430428	-1.30928
	4.2467	-0.252852	0.0230469	0.623496	-0.0197918	-0.553225	0.299451	-0.186157	0.164915	-0.498681	0.331512	0.180902	0.431931	-0.274146	0.0185013	0.326495	0.0251041	0.383522	0.271197	-0.0896404	0.0384003	0.189058	-0.211576	-0.0787804	0.0555279	-0.0772968	0.0784042	-0.232885	0.118193	-0.0291183	0.322168	-0.268301	0.49276	0.524342	0.0353691	-0.597478	0.141212	0.431445	0.282075	-0.129741	0.364174	0.16483	0.975559	0.780793	1.4434	0.855586	0.103643	-0.920903	-1.51388
	4.3082	-0.256696	0.0698421	0.606163	-0.0866974	-0.469913	0.343279	-0.116707	0.097028	-0.418536	0.321435	0.296388	0.508674	-0.167387	0.119089	0.382796	0.137814	0.433783	0.261056	-0.0202965	-0.170406	0.221427	-0.241107	-0.0614838	0.0777916	-0.0120403	0.159619	-0.274522	0.0909825	-0.220836	0.342717	-0.256989	0.500462	0.590399	-0.0402611	-0.566925	0.148966	0.578962	0.327206	-0.133571	0.377785	0.258101	1.02299	0.787676	1.29358	0.558128	-0.0918945	-1.25104	-1.5267
	4.3696	-0.274534	0.0638611	0.592474	-0.374334	-0.542739	0.422603	-0.0788807	0.0923901	-0.538129	0.395687	0.256008	0.477102	-0.278978	0.267347	0.308236	0.0930515	0.358162	0.296319	0.0453556	0.00423318	0.380355	-0.225048	-0.125357	0.0657722	0.135203	0.181391	-0.140504	-0.0215809	-0.208333	0.443479	-0.229209	0.503843	0.49505	0.0684078	-0.467662	0.0906963	0.789497	0.398893	-0.145039	0.381335	0.171792	1.02156	0.806858	1.20939	0.257067	-0.389507	-1.56511	-1.65895
	4.4311	-0.204785	0.0817886	0.668519	-0.541919	-0.481167	0.399819	-0.032045	0.17779	-0.550954	0.393865	0.228455	0.306274	-0.288365	0.357979	0.227348	-0.00331535	0.322107	0.320674	0.0665993	-0.248715	0.332161	-0.306836	-0.0267746	0.0151875	0.189834	0.226402	-0.0133041	-0.0888752	-0.252914	0.376755	-0.223448	0.453777	0.581462	0.0228298	-0.309454	0.114432	0.907187	0.416332	-0.0661724	0.435495	0.230349	1.01142	0.755066	0.854302	0.0314686	-0.587862	-1.67467	-1.28697
	4.4925	-0.222723	0.171331	0.786238	-0.492649	-0.428122	0.435106	0.0761051	0.217895	-0.489672	0.362094	0.33101	0.464386	-0.284899	0.287374	0.180229	-0.0359188	0.120907	0.437008	0.212357	-0.011541	0.402676	-0.226257	0.0210758	-0.028281	0.218761	0.240814	0.134983	-0.0499573	-0.203449	0.450368	-0.224741	0.457918	0.476237	0.115966	-0.148244	0.181597	0.950277	0.570243	0.0277134	0.504912	0.243922	0.960088	0.617332	0.760675	-0.160062	-0.779465	-1.65293	-0.91525
	4.5539	-0.277269	0.179147	0.786332	-0.454364	-0.332685	0.282535	0.0515911	0.367756	-0.475112	0.36442	0.342224	0.383049	-0.0872192	0.327618	0.0701057	-0.0360737	0.133895	0.429713	0.177109	-0.213474	0.311245	-0.204063	0.163101	-0.0501381	0.366265	0.216578	0.105701	-0.101448	-0.106993	0.47199	-0.168163	0.429927	0.532851	0.159711	0.041423	0.325546	1.05315	0.715291	0.0893856	0.45538	0.121368	0.744089	0.34171	0.522373	-0.469402	-0.733141	-1.35806	-0.321304
	4.6154	-0.228336	0.281508	0.705687	-0.223439	-0.263666	0.320086	0.096376	0.207816	-0.421961	0.332454	0.315854	0.369053	-0.0863022	0.271819	0.087772	-0.0587982	0.272154	0.529038	0.198424	-0.108595	0.339287	-0.143458	0.18549	0.0105778	0.34296	0.33998	0.134852	-0.112042	-0.0285584	0.49326	-0.0828381	0.325999	0.456691	0.175433	0.108837	0.436535	1.12399	0.924331	0.389129	0.483346	-0.0558735	0.559879	0.0407082	0.324134	-0.542569	-0.71884	-0.929403	0.46331
	4.6768	-0.22593	0.285645	0.693924	-0.0723736	-0.229792	0.306444	0.108653	0.369216	-0.35171	0.307819	0.396988	0.298436	0.117608	0.325407	0.111291	-0.127307	0.181363	0.568961	0.294515	-0.041209	0.412261	0.0222881	0.289362	0.0771172	0.432361	0.231513	0.178407	-0.0968029	0.0836826	0.498673	0.00922471	0.254643	0.54698	0.207285	0.245519	0.637668	1.23359	0.985605	0.352279	0.323987	-0.165734	0.437292	-0.219973	0.181252	-0.645258	-0.288878	-0.19215	1.42572
	4.7383	-0.250607	0.370008	0.695086	0.0189644	-0.234773	0.227218	0.0543774	0.510285	-0.382491	0.368384	0.400906	0.201086	0.0897121	0.218376	0.0398628	-0.147691	0.229359	0.567047	0.331204	0.150067	0.498731	0.0980789	0.392282	0.0465427	0.593725	0.0480988	0.178865	-0.191848	0.0567963	0.469864	-0.000323849	0.218375	0.536778	0.305817	0.43371	0.769776	1.4475	1.05793	0.45222	0.134745	-0.464392	0.325613	-0.36728	0.0348984	-0.549454	0.25805	0.643079	2.39401
	4.7997	-0.14355	0.419101	0.702433	0.155261	-0.150513	0.442533	-0.0641979	0.510029	-0.414384	0.302409	0.33432	0.161424	0.257194	0.257895	0.0019989	-0.13512	0.243023	0.549911	0.221594	0.154044	0.474384	0.250486	0.305275	0.155949	0.634394	0.117581	0.240905	-0.214347	0.0749202	0.526439	-0.0445595	0.153783	0.587902	0.417075	0.631169	0.90069	1.47305	1.06405	0.313036	0.00386467	-0.513255	0.235071	-0.616336	-0.0290051	-0.35481	1.06422	1.52857	3.33911
	4.8611	-0.119392	0.440787	0.596174	0.161153	-0.210846	0.52188	0.0838539	0.586189	-0.447269	0.429159	0.281916	0.279164	0.305248	0.241217	0.00563927	-0.181962	0.0858314	0.538709	0.298066	0.192029	0.431203	0.306775	0.404129	0.226935	0.710561	0.129936	0.328456	-0.218216	0.0900398	0.438858	-0.107114	0.187918	0.543686	0.571219	0.737617	1.08109	1.50843	0.898793	0.153722	-0.325164	-0.598347	0.18309	-0.707125	0.055373	-0.0812401	1.96061	2.42969	4.1855
	4.9226	-0.0834061	0.422474	0.700968	0.344662	-0.12576	0.4829	0.09179	0.588612	-0.342131	0.412963	0.356189	0.271881	0.343718	0.29783	0.0968731	-0.218512	0.136448	0.585983	0.278325	0.357809	0.341426	0.37676	0.532318	0.265904	0.75125	0.17888	0.349129	-0.207981	0.160502	0.570555	-0.0940697	0.20615	0.518809	0.716293	0.82916	1.15157	1.42216	0.677938	-0.103656	-0.346268	-0.711715	0.273498	-0.60335	0.479776	0.470998	2.91662	3.37509	5.04571
	4.984	-0.0442238	0.523757	0.693675	0.316924	-0.221397	0.446487	0.127007	0.678368	-0.385742	0.392086	0.414424	0.258327	0.394598	0.424184	0.156676	-0.0657166	0.17043	0.624012	0.25355	0.456555	0.357581	0.372996	0.516346	0.246658	0.73296	0.355683	0.388434	-0.107255	0.0335193	0.549075	-0.0624577	0.191814	0.659208	0.799478	1.05057	1.13752	1.28271	0.391794	-0.12688	-0.416035	-0.818347	0.321634	-0.334792	1.01186	1.25129	4.03821	4.08956	5.92513
	5.0455	-0.00186234	0.757147	0.622997	0.341999	-0.0606976	0.537737	0.136807	0.759433	-0.415375	0.446178	0.46328	0.436814	0.398841	0.655545	0.244421	-0.093129	0.149858	0.571246	0.306974	0.507001	0.360606	0.418806	0.445262	0.38213	0.707794	0.474277	0.32688	-0.144264	0.0187111	0.591357	-0.0536446	0.349632	0.714624	1.03124	1.14561	1.0244	1.12357	0.142528	-0.253788	-0.450466	-0.830341	0.66099	0.0729584	1.69243	2.0468	5.14285	4.75905	7.02852
	5.1069	-0.0410854	0.874675	0.643362	0.342653	-0.0759472	0.692791	0.154894	0.756848	-0.275655	0.450064	0.443404	0.409168	0.435667	0.669552	0.232549	-0.0555485	0.156861	0.458323	0.400389	0.675096	0.327499	0.416574	0.523461	0.390504	0.884256	0.648283	0.199957	-0.0751232	0.147208	0.636606	0.0317665	0.331335	0.842057	1.16181	1.10174	0.944392	0.916845	-0.0757297	-0.403993	-0.495492	-0.606662	1.01128	0.766365	2.58345	2.99375	6.06656	5.58112	8.64846
	5.1683	0.00249173	0.927684	0.722533	0.309521	-0.121164	0.686271	0.359524	0.732971	-0.351473	0.482095	0.462178	0.629885	0.705301	0.745666	0.187892	0.0844479	0.203105	0.533662	0.458549	0.511607	0.281468	0.388906	0.644388	0.418276	0.867778	0.840114	0.0995278	0.016486	0.210831	0.650328	0.151717	0.361897	0.836818	1.16948	1.01535	0.628663	0.607897	-0.21242	-0.442598	-0.527969	-0.19991	1.49051	1.68774	3.53491	3.74002	6.86625	6.68898	10.6186
	5.2298	0.0817875	0.833482	0.78894	0.29546	-0.0867855	0.713378	0.446888	0.740654	-0.27094	0.522284	0.579053	0.722698	0.651194	0.827232	0.137209	0.180436	0.137589	0.424066	0.611325	0.592575	0.324317	0.310332	0.701837	0.449499	0.854657	0.861197	0.153918	0.039988	0.320529	0.742537	0.374258	0.465697	1.09469	1.17079	0.940487	0.548854	0.425656	-0.155036	-0.503296	-0.589493	0.456213	2.1834	2.73734	4.47999	4.62415	7.81006	8.20511	12.7001
	5.2912	0.060854	0.826969	0.886336	0.286342	-0.0665371	0.778962	0.514333	0.754226	-0.20183	0.52809	0.647457	0.794956	0.60579	0.753824	0.347424	0.327962	0.119187	0.389566	0.72271	0.567223	0.36953	0.302654	0.871089	0.574728	0.835203	1.02691	0.142428	0.121584	0.511184	0.850856	0.392329	0.568076	1.18046	1.10508	0.743056	0.316503	0.0732677	-0.149957	-0.443029	-0.291515	1.21332	2.97341	3.70219	5.26608	5.45838	9.30912	10.0244	14.3853
	5.3527	0.082605	0.90768	0.946216	0.253411	-0.0259899	0.830755	0.330705	0.708588	-0.137468	0.603299	0.643091	0.908189	0.666295	0.839246	0.293702	0.391467	0.168942	0.501187	0.633711	0.750905	0.271684	0.34662	0.719748	0.596715	0.812333	1.11945	0.179633	0.161226	0.619711	0.878959	0.450261	0.660633	1.08889	1.06558	0.631207	0.206565	-0.0357513	-0.0887246	-0.187695	0.137618	2.1759	3.7381	4.7008	6.17659	6.54394	11.1241	12.0413	15.1947
	5.4141	0.170597	1.11485	0.979127	0.3577	-0.0693127	0.890298	0.423204	0.82958	-0.0817745	0.682196	0.748637	1.0198	0.792932	0.733451	0.303427	0.50695	0.114325	0.720734	0.739562	0.871619	0.252118	0.270954	0.681915	0.778283	0.928768	1.08706	0.243644	0.107703	0.806656	0.920739	0.722197	0.612533	1.02246	0.753297	0.37216	-0.119024	-0.0741924	0.058551	0.356915	0.802119	3.12374	4.67097	5.50049	7.35325	7.62803	13.3678	13.8351	15.1414
	5.4755	0.173361	1.07537	1.03577	0.42043	-0.069717	0.95427	0.198186	0.900336	-0.0012676	0.79236	0.894737	1.14601	0.775488	0.802554	0.36826	0.541086	0.374324	0.740203	0.868703	0.858351	0.359752	0.256696	0.720425	0.775284	0.804285	1.11414	0.304411	0.212334	0.963625	0.988195	0.965747	0.652832	0.872546	0.630021	0.137009	-0.131501	-0.0998272	0.351567	0.968792	1.65866	4.19202	5.58211	6.27612	8.8841	8.78878	15.6623	14.7255	14.0972
	5.537	0.219238	1.34107	1.06656	0.380415	0.0672264	0.85297	0.298566	0.809356	0.0187103	0.704195	0.830167	1.24423	0.785436	0.788817	0.538815	0.753743	0.31751	0.96472	0.919832	0.880809	0.392543	0.237226	0.5595	0.763693	0.805183	1.2768	0.377719	0.483546	1.20445	0.997348	0.937598	0.604577	0.54683	0.397086	0.0056301	-0.264627	0.128584	0.809519	1.6265	2.56288	5.15036	6.42059	7.27753	10.931	10.2128	17.2852	14.6817	12.4319
	5.5984	0.252442	1.23885	1.14805	0.404359	0.0927265	0.795442	0.261078	0.745296	-0.00403022	0.717202	0.867985	1.29734	0.78205	0.786367	0.467175	0.755595	0.479837	0.822355	0.803364	0.88538	0.381341	0.174036	0.822607	0.59155	0.904847	1.29252	0.367997	0.503398	1.35387	1.12494	0.827841	0.516751	0.308549	0.233282	-0.0205841	-0.185294	0.469814	1.4482	2.41904	3.6376	6.23843	7.09776	8.57724	12.8678	12.1586	18.0306	13.9194	10.3652
	5.6599	0.408883	1.14836	1.15981	0.404518	0.123714	0.938472	0.527318	0.704918	0.0090309	0.545503	0.758062	1.39222	0.76184	0.740169	0.598836	0.728767	0.517133	0.884336	0.848436	0.844809	0.341401	0.147655	0.710555	0.48254	0.935582	1.28793	0.486091	0.781751	1.31477	1.04642	0.705692	0.257368	0.103064	0.0187286	0.033305	0.0566917	1.08618	2.25848	3.34956	4.67999	7.61375	8.10674	10.6109	14.4974	14.2875	17.4775	12.5044	8.0167
	5.7213	0.291124	1	1.19368	0.422511	-0.0262375	0.905709	0.515649	0.748297	-0.0631874	0.480223	0.659626	1.15872	0.739012	0.677586	0.534585	0.648909	0.500195	0.69242	0.795948	0.895969	0.307225	0.0556366	0.726238	0.515809	0.852029	1.2912	0.389379	0.952602	1.25306	0.980971	0.478008	0.0789524	-0.544962	-0.172748	0.0144176	0.190306	1.62889	3.095	4.14161	5.71691	9.1886	9.38805	13.0474	15.4029	15.9117	15.9249	10.2872	5.52195
	5.7827	0.378233	0.693355	1.13999	0.258786	-0.0241673	0.64669	0.566082	0.635832	-0.13218	0.261205	0.469616	1.10452	0.659715	0.610355	0.496798	0.487018	0.356879	0.490885	0.626104	0.754281	0.198313	-0.237055	0.7741	0.513588	0.798656	1.22046	0.565574	0.933962	1.00261	0.764685	0.173908	-0.579082	-1.0191	-0.221489	0.26794	0.356019	2.23831	3.80022	4.84936	6.66278	10.8925	10.6866	15.4932	15.1435	16.4736	13.2669	7.9069	3.25201
	5.8442	0.189698	0.404283	0.873359	0.0787682	-0.191795	0.271038	0.287918	0.474716	-0.391887	0.228786	0.485644	0.887159	0.615437	0.53876	0.22185	0.242027	0.0879807	0.10304	0.45399	0.671228	-0.0182266	-0.395581	0.66049	0.460963	0.745546	1.16006	0.496648	0.917953	0.628668	0.467926	-0.233517	-0.895383	-1.29921	-0.231577	0.4002	0.766776	2.9933	4.28855	5.5622	7.6279	12.8412	11.8092	17.1793	14.046	15.9433	10.3988	5.55231	1.26411
	5.9056	0.221875	0.198999	0.831571	0.0956581	-0.102347	0.0923138	0.25422	0.454819	-0.407184	0.328228	0.592314	0.895035	0.794538	0.549073	0.428233	0.107584	0.163441	0.0771259	0.273053	0.577994	0.0617447	-0.544938	0.574004	0.431965	0.673749	1.19692	0.540953	0.889439	0.23594	0.314831	-0.493496	-1.10281	-1.13231	0.15381	1.05442	1.50056	4.00327	4.96161	6.48916	8.74012	15.0309	12.6849	18.1017	12.3765	14.7708	7.43886	3.45201	-0.487011
	5.9671	0.433896	0.288137	1.07585	0.368626	0.267268	0.329996	0.487756	0.551688	-0.144966	0.629127	0.908193	1.13546	0.939913	0.910259	0.836521	0.285971	0.343131	0.228907	0.494632	0.772517	0.431774	-0.294264	0.827216	0.783991	0.903593	1.27477	0.826637	0.832141	0.271614	0.289845	-0.418487	-0.830545	-0.659228	0.961094	2.02857	2.56775	5.01203	5.82096	7.69325	10.1463	17.0828	12.9292	18.0219	10.4234	13.0211	5.11064	1.76908	-1.67801
	6.0285	0.860457	0.722933	1.54922	0.998619	0.897174	0.748751	0.9279	0.86635	0.291802	1.06921	1.4918	1.6157	1.41552	1.48088	1.38445	0.762928	0.905726	0.828933	1.17407	1.3201	1.07076	0.197104	1.40687	1.27733	1.44871	1.3974	1.36721	1.17258	0.533463	0.375793	0.0325493	-0.0972252	0.502919	2.09766	3.16114	3.84948	6.05337	7.0243	8.83349	12.0648	18.7156	12.7828	17.3618	8.66685	10.8416	3.22778	0.819609	-2.19693
	6.0899	1.56675	1.60216	2.44654	2.03357	1.82967	1.53906	1.66127	1.3885	1.11489	1.91006	2.12312	2.51941	2.15683	2.31496	2.31954	1.50471	1.78641	1.63106	2.17354	2.26229	1.95853	0.921541	2.38534	2.12752	2.24801	1.87997	2.02219	1.78839	1.14569	0.712396	0.856784	1.08833	1.96454	3.58818	4.67162	5.35442	7.24702	8.70826	10.3805	14.5238	19.5722	12.3139	16.2173	7.12642	8.86926	2.05506	0.298387	-2.21422
	6.1514	2.80181	2.78968	3.67452	3.14275	2.94862	2.73633	2.65569	2.36761	2.2599	2.80952	3.05538	3.56793	3.12858	3.39307	3.39824	2.59875	2.81315	2.65843	3.43996	3.41351	3.3377	2.29769	3.52916	3.1506	3.20421	2.77272	2.97241	2.5834	2.25841	1.58053	2.05889	2.72608	3.81494	5.48915	6.23163	6.82615	8.57462	10.8831	12.0896	16.8948	19.8679	11.4729	14.6513	5.93582	7.43945	1.36164	0.236647	-1.78741
	6.2128	4.11028	4.36305	5.15404	4.47289	4.60813	4.13285	3.86623	3.73587	3.39888	4.25316	4.26131	4.83148	4.32782	4.72273	4.60663	3.9196	3.90393	4.07018	4.65805	4.80941	4.83203	3.81789	4.91143	4.56934	4.27001	3.74758	3.95007	3.6602	3.66864	2.78381	3.62352	4.74159	5.88949	7.70727	8.12923	8.42852	10.2325	13.2815	13.9276	18.56	19.553	10.7151	13.092	5.42903	6.35955	1.23872	0.709032	-0.92136
	6.2743	5.69122	6.14232	6.75257	6.01286	6.18646	5.70559	5.29671	5.17142	4.87174	5.75085	5.60045	6.27049	5.54777	6.09946	5.997	5.31941	5.03279	5.70292	5.86428	6.25305	6.42179	5.74434	6.44685	6.04017	5.71426	4.97842	5.1518	5.00551	5.34267	4.53627	5.47539	7.15634	8.37413	10.2623	10.4456	10.263	12.6399	15.7517	15.4284	19.5035	18.3337	10.1003	11.8382	5.15837	5.75991	1.5892	1.35763	0.26831
	6.3357	7.43371	7.94368	8.49192	7.56161	7.85668	7.31552	6.87011	6.89232	6.53114	7.2878	7.18777	7.86445	7.07244	7.61193	7.60074	7.03095	6.42104	7.408	7.30653	7.82958	8.05797	7.53094	7.95228	7.62617	7.07255	6.40442	6.42778	6.52611	7.10576	6.47721	7.61422	9.81967	11.2107	13.4225	13.8615	12.4634	15.4406	18.3313	16.2374	19.6926	16.9529	9.69723	10.6312	5.29412	5.52068	2.2013	2.46005	1.69824
	6.3971	9.12697	9.83501	10.1341	9.0657	9.75511	8.84298	8.56019	8.59061	8.1914	8.89134	8.86686	9.54868	8.50125	9.17302	9.13933	8.6744	7.82532	9.07001	8.52291	9.32754	9.70412	9.32149	9.50121	9.07271	8.49417	7.87288	7.68496	8.06152	8.99642	8.73786	10.2011	12.823	14.6498	17.6089	18.3592	15.2682	18.0677	20.4187	16.5276	19.0677	15.3931	9.37108	9.43213	5.81458	5.69253	3.13416	3.52594	3.11234
	6.4586	11.0664	11.5343	11.6986	10.6137	11.3071	10.3448	10.2978	10.1692	9.78696	10.4267	10.6439	11.2732	9.92918	10.4882	10.6406	10.4198	9.51818	10.8281	10.0844	10.9356	11.1645	11.1425	10.7754	10.4228	9.78471	9.28938	8.7893	9.39764	11.0678	11.407	12.8622	16.4002	18.7187	22.8391	23.1135	18.2931	20.0312	21.6285	16.286	17.9675	13.6345	9.10722	8.42198	6.36305	5.82356	4.12728	4.65284	4.71868
	6.52	12.8947	13.0947	13.1579	12.0179	13.1829	11.968	11.9267	11.868	11.3438	12.1363	12.6498	12.7163	11.3611	11.8928	12.2008	12.1777	11.1332	12.4694	11.6266	12.3638	12.6079	12.8003	11.9257	11.638	10.8995	10.4706	9.83777	10.8501	13.1622	14.0648	15.6143	20.572	23.3912	28.07	27.2585	21.2704	20.9623	21.5644	15.4062	16.3392	12.0786	9.00107	7.37123	6.87339	5.9638	5.00144	5.66933	6.12035
	6.5815	14.5945	14.7442	14.4309	13.1712	14.6496	13.2516	13.3788	13.4833	12.5741	13.9868	14.6718	13.7761	12.6744	13.157	13.5799	13.8465	12.8435	14.0058	13.151	13.6269	13.6767	14.1876	12.5333	12.4361	11.6263	11.485	10.8523	12.5265	15.0955	16.8621	18.71	24.648	27.9983	32.0772	29.8907	23.6146	21.0739	20.7599	14.2983	14.35	10.4567	8.74913	6.29456	7.2166	6.07975	5.62335	6.59	7.30898
	6.6429	16.0103	16.4981	15.9042	14.1615	16.3847	14.6334	14.5224	14.796	13.6583	15.531	16.2606	14.6313	13.747	14.3043	15.082	15.5389	13.9747	15.2132	14.2038	14.6433	14.3862	14.8727	13.0368	12.9277	12.083	12.3853	11.9257	13.8891	17.026	20.1884	22.4271	28.2497	31.4943	33.8721	30.9767	24.9398	20.389	18.9451	12.8778	12.3938	8.74238	8.31426	5.28687	7.25697	5.77925	6.03434	7.16213	8.11334
	6.7043	16.8802	18.6731	17.2826	14.8129	18.4624	15.6891	15.2873	15.9019	14.3504	17.1151	16.999	15.0971	14.4668	15.5701	16.084	16.7491	15.1091	16.0576	15.0543	15.4945	14.51	15.1631	13.0963	12.9434	12.1303	12.9298	13.0271	15.6421	19.1737	23.9581	26.2965	30.7649	33.0875	33.267	30.4331	24.8182	19.5373	16.4927	11.4042	10.3217	7.0807	7.86309	4.23306	7.03903	5.30111	6.19866	7.64487	8.69668
	6.7658	17.7826	20.602	18.5545	15.2673	21.1251	16.1024	15.8093	16.6813	14.9387	18.3453	16.8959	15.5575	14.9766	16.8611	16.9697	17.5567	15.6563	16.6364	15.3861	16.119	13.9525	15.0616	12.7162	12.5946	11.9137	13.0755	13.8038	17.7514	21.8149	27.7874	29.455	31.579	32.3427	30.8277	28.4971	23.1919	18.2989	13.7636	9.71651	8.25556	5.55425	7.12477	3.27572	6.51314	4.72143	6.09402	7.69584	8.68109
	6.8272	18.653	21.6069	19.8696	15.524	23.4031	16.2547	15.8843	17.2496	15.7788	19.4625	16.3976	16.0952	14.9373	17.9374	16.8106	18.1749	16.1201	17.293	15.7132	16.1482	12.9296	14.9537	12.1901	11.7332	11.6937	12.8081	14.6971	20.5076	24.7344	30.4522	30.8568	30.8083	30.0181	26.9416	25.6552	20.4277	16.7502	11.1254	7.95663	6.34597	3.96086	6.17661	2.33374	5.8184	3.97435	5.73272	7.06152	8.43698
	6.8887	19.5959	22.0553	21.2949	15.697	24.6373	16.1237	15.6084	17.7449	16.629	20.4935	16.072	16.549	14.3511	18.3832	16.2954	18.8936	16.4807	18.2603	15.9801	15.6364	11.4676	14.7297	11.4555	10.4609	11.6894	12.0977	15.9535	23.5134	27.2487	31.4527	30.4133	28.345	26.4276	22.4683	21.9247	16.7844	14.8255	8.57186	6.28324	4.43153	2.58145	5.17112	1.45086	4.96965	3.29332	5.18669	6.19481	7.78279
	6.9501	20.3329	21.8295	22.1547	15.7881	24.7537	15.6273	15.1391	18.0477	17.7264	20.9707	15.8536	16.4988	13.2504	18.0431	15.1308	19.421	16.5213	19.0343	15.7751	14.4114	9.64858	14.3875	10.5668	9.00396	11.9791	11.4844	17.3249	26.3702	28.779	30.6531	28.4258	24.8541	21.985	17.6193	18.0524	13.213	12.7102	6.12532	4.62533	2.80275	1.31951	4.02141	0.529313	3.99844	2.32328	4.29749	5.01355	6.82719
	7.0116	20.5519	21.1636	22.325	16.1216	23.8005	14.6499	14.7979	17.7634	17.9892	20.5808	15.6353	15.7989	11.6792	16.838	13.7409	19.1823	16.1096	19.1472	15.2011	13.0024	7.68165	14.0792	9.53789	7.65632	12.2221	11.0847	18.9049	28.179	28.9435	28.375	25.0701	20.4871	17.2554	13.0515	14.1787	9.60967	10.3631	3.93899	3.02956	1.20886	0.0458343	2.88956	-0.25594	2.85551	1.48522	3.30792	3.64	5.6197
	7.073	20.185	19.4427	21.4361	16.1611	21.8685	13.3016	14.7358	17.209	17.6498	19.3827	15.1243	14.6191	9.83176	14.857	12.0246	18.3215	15.2357	18.7606	14.063	11.3127	5.92436	13.3432	8.28007	6.50531	12.3131	11.4768	19.9077	28.6013	27.6734	24.6908	20.7347	15.8751	12.6193	8.83122	10.4807	6.46916	7.88876	1.93836	1.53218	-0.2328	-1.06904	1.77245	-1.08232	1.81264	0.590427	2.24678	2.23239	4.27969
	7.1344	18.8867	17.123	19.5054	15.6903	19.0662	11.5938	14.8123	15.9152	16.4978	17.3609	14.0492	12.9904	7.90969	12.4533	10.3079	16.3895	13.991	17.7296	12.3876	9.39088	4.24621	12.3805	7.08382	5.83611	12.1689	12.1343	20.2339	27.4802	24.7779	20.1342	15.9738	11.339	8.34295	5.17808	6.92354	3.65263	5.40958	0.106663	0.198328	-1.49884	-2.07551	0.542303	-1.95459	0.632756	-0.145463	1.17978	0.838031	2.95565
	7.1959	16.9106	14.3607	16.9168	14.6693	15.738	9.71585	14.3788	14.3149	14.5988	14.533	12.4965	10.8235	6.09815	9.83541	8.47616	14.0493	12.0946	15.7166	10.5653	7.45927	2.94733	10.9993	6.00313	5.66335	11.9451	12.7334	20.1681	25.3083	20.8763	15.2347	11.2812	7.14494	4.75522	2.01056	3.79371	1.18892	3.11235	-1.4357	-1.11063	-2.67796	-2.94186	-0.47174	-2.69179	-0.328859	-0.869513	0.278469	-0.299918	1.53189
	7.2573	14.1456	11.2701	13.8659	13.0507	12.0734	7.68682	13.4398	12.3259	12.3055	11.7087	10.5428	8.80533	4.32945	7.12318	6.4537	10.9853	9.89915	13.2331	8.32277	5.64551	1.88988	9.45529	4.95465	5.55169	11.8585	12.9393	19.3755	22.169	16.4277	10.5054	7.02987	3.54502	1.46758	-0.400578	1.07906	-0.969759	1.03893	-2.65739	-2.26902	-3.55896	-3.67619	-1.34971	-3.22759	-1.04201	-1.51644	-0.675668	-1.20086	0.32754
	7.3188	11.0822	8.15393	10.4296	10.9442	8.65691	5.62031	12.0182	10.0002	9.60731	8.58265	8.30865	6.56055	2.71468	4.62394	4.546	7.95419	7.45075	10.3578	6.06758	4.10821	1.2262	7.63251	3.99803	5.55583	11.6911	12.7046	18.1353	18.2832	11.764	6.10924	3.05541	0.53261	-1.05532	-2.51087	-1.28584	-2.82815	-0.763682	-3.78119	-3.22585	-4.29418	-4.41187	-2.23112	-3.82786	-1.75027	-1.99491	-1.60053	-1.91343	-0.838718
	7.3802	7.87853	5.1112	7.14144	8.57644	5.19097	3.61199	10.1744	7.75967	6.89549	5.77597	5.94317	4.59966	1.35649	2.32408	2.67861	4.81229	4.96114	7.51994	4.03852	2.62012	0.848597	6.06451	3.14883	5.5139	11.0107	12.2343	16.2367	14.0463	7.31806	2.40463	-0.0898163	-2.07687	-3.22479	-4.14522	-3.19132	-4.23516	-2.35869	-4.58728	-4.02585	-4.8152	-4.80806	-2.88513	-4.33104	-2.2767	-2.43338	-2.1529	-2.37432	-1.72518
	7.4416	4.66655	2.3188	4.05728	5.96039	2.33409	1.79049	7.95017	5.29091	4.4159	3.30943	3.5649	2.76804	-0.0615532	0.326791	0.912821	2.28148	2.77193	4.75483	2.49711	1.58311	0.634536	4.53408	2.52094	5.06997	9.9295	11.576	13.8204	9.95218	3.31435	-0.725022	-2.6559	-4.01617	-4.95982	-5.40332	-4.64852	-5.34831	-3.6113	-5.38916	-4.71257	-5.28024	-5.28954	-3.36537	-4.83978	-2.79048	-2.93331	-2.65451	-2.77716	-2.26695
	7.5031	1.8669	-0.0719282	1.39486	3.61647	-0.25309	0.151932	5.68019	3.11273	2.27334	1.06919	1.5145	1.14841	-1.1952	-1.35216	-0.517953	-0.0989178	0.686488	2.49865	1.20785	0.794038	0.640305	3.00254	1.73874	4.47116	8.3766	10.6897	10.9803	6.08235	0.0383625	-3.16723	-4.74699	-5.52567	-6.28379	-6.48698	-5.96827	-6.35293	-4.70605	-5.91523	-5.08697	-5.49983	-5.61874	-3.86523	-4.97672	-3.0861	-3.15476	-3.0959	-3.29807	-2.79195
	7.5645	-0.613445	-2.04902	-0.754361	1.45416	-2.36856	-1.37465	3.32552	1.07175	0.33864	-0.763992	-0.350369	-0.35656	-2.36916	-2.69911	-1.6796	-1.8124	-0.829309	0.698852	0.413707	0.282302	0.473754	1.77008	1.05476	3.57503	6.50493	9.32977	8.04044	2.47975	-2.83562	-5.29238	-6.41302	-6.72386	-7.24262	-7.1998	-6.94058	-7.1407	-5.4279	-6.3245	-5.53627	-5.58849	-5.68956	-4.19265	-5.2903	-3.27862	-3.44727	-3.31754	-3.61123	-3.2064
	7.626	-2.67109	-3.48562	-2.64503	-0.596175	-3.90424	-2.46768	1.29826	-0.567586	-1.16572	-2.39483	-2.01487	-1.60912	-3.58794	-3.77121	-2.64269	-3.1605	-1.96761	-0.519118	-0.0209377	0.0895821	0.392328	0.475826	0.380149	2.65691	4.54252	7.59439	5.08265	-0.564726	-5.2875	-6.75002	-7.7206	-7.52421	-7.86732	-7.59888	-7.6174	-7.63859	-6.12544	-6.56911	-5.71692	-5.73844	-5.87903	-4.34882	-5.44491	-3.39103	-3.59985	-3.43577	-3.75479	-3.62766
	7.6874	-4.13172	-4.72091	-4.02105	-2.24849	-5.23466	-3.49795	-0.565062	-1.95183	-2.45982	-3.78487	-3.34558	-2.7191	-4.54755	-4.55846	-3.31423	-3.9548	-2.70263	-1.16076	-0.372328	-0.163616	0.417314	-0.510643	-0.227834	1.68607	2.46814	5.76817	2.17009	-2.97954	-7.17875	-7.8693	-8.56627	-8.16658	-8.28548	-7.99918	-8.01581	-7.93601	-6.49522	-6.68508	-5.80352	-5.77694	-5.90166	-4.47648	-5.48374	-3.49541	-3.77545	-3.72377	-3.89846	-3.91223
	7.7488	-5.36507	-5.77246	-5.23146	-3.50533	-6.1493	-4.12441	-2.07027	-3.0719	-3.64614	-4.84979	-4.34716	-3.58644	-5.22186	-5.14599	-3.75327	-4.3236	-3.15674	-1.56448	-0.555502	-0.165478	0.268692	-1.46065	-0.873962	0.635597	0.468828	3.79364	-0.382388	-5.10167	-8.72247	-8.73076	-9.17327	-8.57356	-8.54435	-8.17099	-8.26302	-8.20611	-6.68225	-6.77914	-5.77937	-5.67731	-5.79786	-4.49453	-5.43357	-3.55259	-3.90199	-3.69876	-3.91844	-4.13788
	7.8103	-6.27043	-6.36069	-5.99427	-4.71737	-6.95559	-4.63338	-3.27901	-3.93665	-4.46309	-5.68999	-5.3249	-4.31257	-5.63582	-5.41448	-3.77638	-4.376	-3.11646	-1.71338	-0.607779	-0.489991	-0.0148002	-2.36332	-1.42614	-0.329427	-1.3016	1.7474	-2.76681	-6.66519	-9.63927	-9.14958	-9.45093	-8.74755	-8.66872	-8.21947	-8.44682	-8.14242	-6.86793	-6.74801	-5.71574	-5.61847	-5.71476	-4.30511	-5.3004	-3.73838	-3.9086	-3.8002	-3.87451	-4.31304
	7.8717	-6.87298	-6.70819	-6.5943	-5.52824	-7.35144	-4.99119	-4.2534	-4.72251	-5.31103	-6.33377	-6.04419	-4.82369	-5.75143	-5.37464	-3.42125	-4.03963	-2.83731	-1.6739	-0.542952	-0.609917	-0.177193	-3.22714	-1.91095	-1.31505	-2.81916	-0.157704	-4.73206	-7.92867	-10.1881	-9.35324	-9.65382	-8.83076	-8.59458	-8.16859	-8.49617	-8.10997	-7.00425	-6.62282	-5.6338	-5.46967	-5.57485	-4.23363	-5.19366	-3.83358	-3.98403	-3.85331	-3.73128	-4.42719
	7.9332	-7.24445	-7.0468	-6.93151	-6.04459	-7.463	-5.26056	-5.012	-5.20841	-5.8334	-6.70712	-6.36728	-5.25091	-5.67655	-4.87722	-2.97626	-3.53725	-2.22068	-1.53266	-0.66552	-0.839446	-0.466431	-3.93346	-2.35064	-2.17821	-4.02158	-1.9109	-6.34094	-8.74852	-10.5236	-9.42734	-9.54471	-8.8111	-8.50011	-7.97804	-8.23926	-7.83331	-6.838	-6.32499	-5.44145	-5.24019	-5.3311	-3.99115	-4.89459	-3.9689	-3.99234	-3.79019	-3.71543	-4.4557
	7.9946	-7.56326	-6.99097	-7.02411	-6.33529	-7.57331	-5.29195	-5.58339	-5.69347	-6.42086	-6.99917	-6.68889	-5.42025	-5.28701	-4.3371	-2.15678	-2.91459	-1.52994	-1.45724	-0.757292	-1.02297	-0.789995	-4.54832	-2.74911	-3.02948	-5.01226	-3.4355	-7.55491	-9.28058	-10.4548	-9.34128	-9.41349	-8.68051	-8.32584	-7.72287	-8.08727	-7.61867	-6.74711	-6.10931	-5.23862	-5.02249	-5.06684	-3.87059	-4.5803	-3.93253	-3.85865	-3.7219	-3.59722	-4.56328
	8.056	-7.65414	-6.99213	-7.06871	-6.40156	-7.46744	-5.54395	-6.1648	-6.00376	-6.7617	-7.24506	-6.7713	-5.24703	-4.82815	-3.68803	-1.30357	-2.23839	-0.884162	-1.34622	-0.91627	-1.13345	-1.25457	-5.01003	-3.07438	-3.48109	-5.77522	-4.60306	-8.27021	-9.5612	-10.2458	-9.23784	-9.24626	-8.439	-7.99521	-7.50167	-7.92959	-7.28335	-6.5327	-5.80153	-4.9649	-4.80334	-4.78917	-3.6245	-4.37114	-3.96256	-3.58937	-3.62565	-3.43944	-4.63056
	8.1175	-7.42663	-6.78872	-6.78196	-6.25969	-7.40245	-5.66077	-6.50451	-6.28041	-6.9408	-7.18102	-6.65549	-4.87369	-4.08226	-2.8178	-0.37024	-1.51348	-0.302482	-1.3194	-1.18978	-1.35871	-1.60427	-5.22146	-3.53551	-4.09931	-6.27663	-5.60602	-8.85025	-9.6089	-10.0653	-8.86213	-9.0554	-8.17278	-7.72373	-7.1754	-7.62349	-7.00131	-6.22963	-5.44406	-4.75534	-4.51803	-4.40839	-3.4232	-4.08954	-3.9713	-3.53019	-3.48087	-3.10414	-4.58267
	8.1789	-7.30058	-6.53581	-6.45216	-6.17969	-7.20712	-5.6761	-6.79453	-6.49086	-7.02262	-6.9248	-6.33156	-4.26656	-3.20675	-2.01356	0.243902	-0.884103	0.0426883	-1.5213	-1.50022	-1.60666	-1.98533	-5.51439	-3.77298	-4.60167	-6.68412	-6.25716	-8.96896	-9.62513	-9.64209	-8.46076	-8.81092	-7.93171	-7.40335	-6.84672	-7.34129	-6.61292	-5.81164	-5.04429	-4.55642	-4.29614	-4.05538	-3.2419	-3.82617	-3.85672	-3.43874	-3.32775	-2.95935	-4.47039
	8.2404	-7.00205	-6.19453	-6.18878	-5.97103	-7.06736	-5.58047	-6.84599	-6.5026	-6.9191	-6.4485	-5.83282	-3.41275	-2.09469	-1.13576	1.07955	-0.370222	0.327539	-1.69391	-1.70927	-1.91289	-2.46506	-5.68495	-4.17329	-4.94821	-6.99243	-6.77454	-9.07373	-9.37724	-9.13974	-8.07046	-8.54595	-7.54531	-7.17636	-6.56566	-7.00027	-6.18293	-5.43006	-4.6318	-4.28233	-3.92154	-3.66763	-2.99712	-3.57529	-3.84028	-3.32342	-3.14218	-2.89618	-4.31456
	8.3018	-6.63044	-5.80668	-5.85527	-5.97549	-6.94173	-5.54344	-6.92346	-6.33898	-6.73306	-5.9489	-5.10579	-2.43111	-1.00418	-0.359756	1.50503	-0.0922333	0.473708	-1.96794	-2.09453	-2.20668	-2.76376	-5.92866	-4.42605	-5.19731	-7.03087	-7.06117	-9.12376	-9.02144	-8.61257	-7.54233	-8.31987	-7.0943	-6.83543	-6.14218	-6.59302	-5.6225	-4.95464	-4.28556	-3.95594	-3.68439	-3.29248	-2.81843	-3.31885	-3.69031	-3.18889	-2.95119	-2.59198	-4.28127
	8.3632	-6.16347	-5.34385	-5.44072	-5.82836	-6.72023	-5.28717	-6.89987	-6.07437	-6.13892	-5.04137	-4.17064	-1.38825	0.0623364	0.611782	1.97137	0.217289	0.306933	-2.33272	-2.46614	-2.59569	-3.17944	-5.97469	-4.5387	-5.32325	-7.01773	-7.29113	-9.18292	-8.72131	-8.07564	-6.98916	-7.85454	-6.68232	-6.43441	-5.75612	-6.02907	-5.19782	-4.59507	-4.0331	-3.54904	-3.19072	-3.03181	-2.67215	-2.94055	-3.49874	-2.90485	-2.93273	-2.45776	-4.26001
	8.4247	-5.72228	-4.9437	-5.09339	-5.69383	-6.48599	-5.1908	-6.67569	-5.61482	-5.43716	-4.05469	-2.98849	-0.319535	1.00202	1.23191	2.22458	0.29118	0.0464821	-2.59176	-2.69302	-2.84515	-3.56363	-5.97209	-4.56489	-5.46389	-6.81716	-7.40151	-8.9913	-8.21678	-7.60219	-6.49267	-7.47412	-6.33597	-5.97521	-5.31054	-5.60915	-4.75031	-4.19192	-3.55858	-3.26238	-2.94273	-2.56043	-2.45687	-2.66112	-3.41944	-2.77578	-2.74599	-2.3062	-4.1832
	8.4861	-5.36316	-4.72695	-4.72699	-5.53307	-6.35631	-4.87092	-6.41239	-5.02626	-4.61271	-2.92601	-1.92511	0.509672	1.96879	1.78333	2.28266	0.253613	-0.161985	-2.86678	-2.89992	-3.06555	-3.68802	-5.9739	-4.43792	-5.52832	-6.65753	-7.27345	-8.88723	-7.66515	-7.15749	-5.84175	-6.99943	-5.86894	-5.63544	-4.7903	-5.16409	-4.29193	-3.70889	-3.14317	-3.04612	-2.56488	-2.27403	-2.37427	-2.41323	-3.27097	-2.47429	-2.57502	-2.29142	-4.10773
	8.5476	-5.0169	-4.55691	-4.46885	-5.39096	-6.05541	-4.63467	-5.95634	-4.23599	-3.54245	-1.63181	-0.6551	1.43489	2.58197	2.0284	2.35192	0.23987	-0.381947	-2.99755	-3.27551	-3.24915	-3.9161	-5.82315	-4.32899	-5.44684	-6.32325	-6.95113	-8.50234	-7.25326	-6.73455	-5.35708	-6.48845	-5.19125	-5.22233	-4.43274	-4.71783	-3.92886	-3.34373	-2.86217	-2.62286	-2.12594	-1.86729	-2.22001	-2.27223	-3.04175	-2.12371	-2.46264	-2.24434	-4.03611
	8.609	-4.70932	-4.36029	-4.13743	-5.24429	-5.85686	-4.1897	-5.20891	-3.17394	-2.32091	-0.3258	0.411847	2.21521	2.92769	2.2603	2.22149	0.0884106	-0.741502	-3.25886	-3.43641	-3.5093	-3.9863	-5.73746	-4.35173	-5.35624	-6.04145	-6.64256	-8.22954	-6.60647	-6.24122	-4.79823	-6.08724	-4.64665	-4.72144	-3.95956	-4.25333	-3.58966	-2.8906	-2.36108	-2.36549	-1.88294	-1.3533	-2.1215	-1.86741	-2.75932	-2.01432	-2.2064	-2.13217	-3.95325
	8.6704	-4.28926	-4.24694	-3.72952	-4.94183	-5.44837	-3.53368	-4.28308	-2.02444	-1.0099	0.880568	1.37167	2.68442	3.19599	2.22456	2.01863	-0.0385094	-0.978621	-3.52412	-3.51956	-3.55863	-4.00327	-5.57433	-4.33994	-5.11809	-5.51508	-6.25776	-7.86299	-5.94553	-5.85568	-4.23053	-5.27223	-3.98117	-4.05536	-3.47796	-3.74336	-3.08999	-2.47747	-2.00312	-2.0567	-1.68571	-0.836287	-2.00691	-1.55793	-2.45223	-1.88708	-1.9695	-2.01402	-3.77248
	8.7319	-4.04629	-3.90231	-3.39795	-4.64297	-4.78493	-2.87515	-3.19872	-0.772753	0.439124	2.10367	2.1842	3.18848	3.36716	2.12246	1.79783	-0.314014	-1.27998	-3.81658	-3.57411	-3.64305	-4.04472	-5.35272	-4.34825	-4.94917	-5.17367	-5.88012	-7.37016	-5.28512	-5.43095	-3.62254	-4.67217	-3.31986	-3.5416	-3.02223	-3.17205	-2.68132	-1.90786	-1.59051	-1.6869	-1.52784	-0.532282	-1.95775	-1.3006	-2.00861	-1.68162	-1.72908	-1.88629	-3.60773
	8.7933	-3.7934	-3.62311	-3.02087	-4.29925	-4.18244	-2.07538	-1.95959	0.564483	1.53427	3.03873	2.94738	3.49693	3.54423	1.97399	1.36622	-0.440449	-1.49402	-3.84694	-3.50436	-3.75414	-3.89376	-4.98485	-4.29762	-4.55687	-4.80557	-5.32939	-6.88007	-4.67517	-4.92042	-3.12255	-3.90487	-2.52095	-2.94228	-2.54517	-2.44026	-2.23212	-1.31841	-1.12265	-1.17923	-1.31687	-0.095031	-1.56537	-1.18764	-1.61468	-1.57569	-1.45362	-1.58983	-3.29359
	8.8548	-3.45779	-3.21322	-2.43604	-3.75581	-3.30891	-0.986401	-0.753227	1.84484	2.7724	3.76438	3.42921	3.71098	3.721	1.72991	1.06303	-0.668353	-1.71552	-3.8558	-3.30201	-3.73339	-3.84336	-4.6386	-4.10411	-4.14547	-4.28064	-4.86937	-6.23013	-4.1101	-4.41548	-2.53182	-3.25315	-1.68675	-2.30478	-2.0342	-1.72911	-1.7993	-0.637461	-0.508787	-0.768638	-0.952153	0.34241	-1.27749	-0.833928	-1.21986	-1.32368	-1.11642	-1.32476	-2.8266
	8.9162	-3.07706	-2.83467	-1.92684	-2.96012	-1.99574	0.19206	0.604162	2.9859	3.73872	4.22111	3.65844	3.71196	3.98858	1.44771	0.782798	-0.822247	-1.83665	-3.75921	-3.07882	-3.61381	-3.78815	-4.21789	-3.91015	-3.54809	-3.82236	-4.27012	-5.52498	-3.45437	-3.79539	-1.90855	-2.48332	-0.83063	-1.61284	-1.44968	-0.938268	-1.19859	0.0524429	-0.0710171	-0.184489	-0.50862	0.691908	-1.07888	-0.591191	-0.872671	-1.2327	-0.690505	-0.988318	-2.28739
	8.9776	-2.62447	-2.31268	-1.17514	-1.92466	-0.706111	1.34544	1.73387	4.06911	4.69067	4.63642	3.90103	3.66413	4.50194	1.42672	0.445171	-0.931096	-2.00711	-3.37259	-2.81943	-3.47778	-3.5595	-3.68678	-3.69467	-3.09041	-3.13172	-3.64962	-4.69886	-2.80335	-3.27738	-1.30749	-1.82299	0.024337	-0.951524	-0.962581	-0.219081	-0.674604	0.661275	0.522633	0.527803	-0.025534	0.997952	-0.627485	-0.346106	-0.421054	-0.900198	-0.316306	-0.612832	-1.88314
	9.0391	-2.11651	-1.86897	-0.236547	-0.632344	0.766952	2.71482	2.9122	5.17107	5.75799	4.80838	3.78351	3.5087	4.83249	1.29237	0.128492	-1.01293	-1.95864	-3.07973	-2.49464	-3.0924	-3.31961	-3.19521	-3.43731	-2.49758	-2.36171	-3.08633	-3.87262	-2.09066	-2.58353	-0.631906	-1.07768	0.852084	-0.384166	-0.372909	0.600015	0.0536782	1.29862	1.01851	1.0583	0.456591	1.36945	-0.00565798	-0.164149	-0.0036644	-0.57892	0.114791	-0.172065	-1.16896
	9.1005	-1.44733	-1.02668	0.736069	0.690868	2.08931	4.16549	4.10668	6.36394	7.01144	4.97634	3.67763	3.3364	4.96035	1.1507	-0.177294	-1.17841	-1.92093	-2.60004	-2.12208	-2.67338	-2.92628	-2.59135	-3.00984	-2.04645	-1.55212	-2.56698	-2.93027	-1.23631	-1.95435	0.0284328	-0.575613	1.78759	0.29579	0.114419	1.35787	0.825859	1.89804	1.45035	1.60129	1.14998	1.69537	0.591176	0.0650753	0.371209	-0.190019	0.532684	0.130494	-0.516428
	9.162	-0.562891	-0.341797	1.98062	2.38627	3.24247	5.53612	5.01339	7.66814	8.47938	5.04123	3.34733	2.92853	4.93402	0.941024	-0.421225	-1.19684	-1.86495	-2.1108	-1.91294	-2.3788	-2.52141	-2.00901	-2.48055	-1.52593	-0.775691	-1.80652	-2.09248	-0.520277	-1.16001	0.629801	-0.0228802	2.73145	0.864428	0.733983	2.19947	1.51954	2.45358	1.83595	2.18016	1.59006	2.01718	1.29737	0.453745	0.832412	0.223011	0.980838	0.579609	0.139433
	9.2234	0.242315	0.610766	3.28143	4.21297	4.65001	6.96258	6.14776	9.13559	9.50259	5.0624	2.97557	2.6251	4.62463	0.737523	-0.415791	-1.02768	-1.7751	-1.70354	-1.56989	-1.94756	-2.04275	-1.39894	-1.87537	-0.94697	-0.0656078	-1.17514	-1.19571	0.287743	-0.33404	1.24552	0.490605	3.59394	1.67901	1.40334	3.115	2.26804	2.80785	2.00616	2.69464	2.17538	2.2228	1.89255	0.837095	1.12204	0.773623	1.3753	1.07537	0.824627
	9.2848	1.36854	1.83859	4.6236	6.18839	5.7459	8.51148	7.5202	10.852	10.107	5.01121	2.61537	2.29406	4.3	0.607541	-0.478311	-0.909083	-1.44804	-1.19841	-1.43993	-1.3177	-1.73168	-0.870596	-1.13565	-0.373798	0.727136	-0.528112	-0.271533	0.983885	0.516571	1.74076	0.926149	4.49598	2.53116	2.27774	4.11283	3.07076	2.96081	2.1659	3.03661	2.58141	2.6257	2.47724	1.34873	1.5266	1.16782	1.62221	1.58806	1.42374
	9.3463	2.45283	3.29839	6.30903	8.47318	6.98643	10.7516	9.28982	12.2718	10.122	4.91363	2.14006	1.95034	3.85792	0.516899	-0.485839	-0.679354	-1.19074	-0.660899	-1.11368	-0.901266	-1.47039	-0.393663	-0.576176	0.204198	1.48239	0.120258	0.653524	1.66897	1.67833	2.51236	1.37732	5.38544	3.33993	3.21623	5.03502	3.69868	3.01217	2.39162	3.44166	2.99095	2.88281	3.06186	1.57471	1.91791	1.45334	1.96857	2.0873	1.99314
	9.4077	3.79065	4.83485	8.00139	11.1151	8.18442	14.2328	11.3827	13.0347	9.68376	4.73459	1.70327	1.67929	3.37068	0.543974	-0.393058	-0.39794	-0.665856	0.0664554	-0.810485	-0.530407	-1.06186	-0.11581	0.154942	0.85634	2.06881	0.576217	1.38361	2.50784	2.81899	3.17175	1.89776	6.16269	4.0219	4.04415	5.94941	4.14891	2.99538	2.57088	3.67938	3.14087	3.06346	3.54142	1.85767	2.24582	1.91515	2.15204	2.50714	2.50383
	9.4692	5.20448	6.54369	9.80168	13.9117	9.71127	18.7029	13.5118	12.9014	8.74813	4.46321	1.18511	1.61009	2.75094	0.510509	-0.355063	-0.101851	-0.255239	0.770478	-0.278282	-0.152167	-0.803803	0.321183	0.905338	1.35312	2.64144	1.34078	2.17621	3.48608	3.93741	3.76263	2.43039	6.84333	4.55179	4.62755	6.89185	4.86177	3.07482	2.74358	3.74704	3.2165	3.22769	3.81408	2.08484	2.60328	2.38624	2.28712	2.86118	2.94868
	9.5306	7.09535	8.50283	11.7754	16.405	10.9162	23.14	15.4465	12.1569	7.6974	3.99089	0.713967	1.54412	2.25853	0.357942	-0.323085	0.205467	0.00438195	1.43466	0.201551	0.34124	-0.67884	0.665727	1.46444	1.96965	3.06665	1.73273	2.85836	4.22415	4.92948	4.16687	2.92632	7.37398	4.82427	4.76992	7.67736	5.68199	2.9509	2.90721	3.5827	3.42907	3.35478	4.10567	2.29007	2.87256	2.49994	2.45739	3.09253	3.31763
	9.592	9.58814	11.1241	13.9708	18.3576	11.8836	26.2729	16.7708	11.0874	6.3921	3.59644	0.300877	1.4125	1.7397	0.259623	-0.23322	0.259272	0.184501	1.93557	0.708132	0.699815	-0.571923	1.03821	2.00051	2.20522	3.53373	2.24865	3.356	4.93366	5.5242	4.3856	3.15995	7.40402	4.89716	4.37532	8.27217	6.54553	2.96137	3.06279	3.42759	3.43183	3.45883	4.28425	2.39625	3.06916	2.58126	2.62665	3.18072	3.48757
	9.6535	12.5552	14.7005	16.8084	20.0425	12.4514	27.8708	17.4239	9.58437	5.16866	2.95049	0.0229145	1.31026	1.28359	0.180203	-0.167367	0.33755	0.369463	2.19829	1.09592	0.880424	-0.35096	1.19027	2.55941	2.54502	4.09253	2.58148	4.04001	5.19677	5.52854	4.29641	3.17531	7.14095	4.71105	3.47661	8.66506	7.17389	2.9294	3.07551	3.35102	3.55819	3.61187	4.27603	2.41252	3.22325	2.60963	2.68951	3.32479	3.52041
	9.7149	15.9599	19.4931	19.8424	21.0402	12.6719	27.3843	17.3928	7.9643	3.91183	2.54831	-0.213163	1.21731	0.868841	0.0387825	-0.0780483	0.257962	0.413563	2.49787	1.4719	1.06181	-0.182285	1.41684	2.99802	2.81229	4.64111	2.69336	4.31901	4.9948	5.23356	4.0304	2.89825	6.75399	4.36682	2.34682	8.82014	7.49644	2.89935	3.05692	3.39549	3.69616	3.56098	4.23242	2.53968	3.13279	2.68511	2.74445	3.34274	3.50429
	9.7764	19.2855	24.1679	22.4148	21.4219	12.5697	25.4015	16.3355	6.34982	2.66573	1.96619	-0.240437	1.096	0.372334	-0.000414662	0.110529	0.345581	0.384273	2.64302	1.48986	1.08304	0.0550583	1.44576	3.51034	3.03947	5.41812	2.72197	4.39832	4.58904	4.37165	3.50756	2.49252	6.20567	4.21784	1.26703	8.8336	7.5012	2.88971	3.07004	3.36707	3.6892	3.44272	4.03763	2.39421	3.26451	2.66259	2.76319	3.36916	3.33179
	9.8378	22.2798	27.8898	24.057	20.8865	12.0332	22.0013	14.761	4.90409	1.3252	1.47507	-0.309942	0.74308	0.00218704	-0.168739	0.0846424	0.243102	0.498055	2.68539	1.72231	1.21064	0.263654	1.57681	3.90141	3.1367	6.29065	2.70424	4.0216	3.88434	3.56625	3.01019	2.01369	5.86359	4.2357	0.523715	8.56352	7.24031	2.77102	3.09866	3.33555	3.58812	3.34622	3.8211	2.35273	3.17612	2.63559	2.70202	3.21297	3.23628
	9.8992	24.9179	29.9775	24.7253	19.4737	11.0798	18.0065	12.5809	3.3522	0.209147	0.829617	-0.38233	0.502882	-0.492141	-0.275813	0.235315	0.185717	0.473691	2.52704	1.68495	1.24481	0.292075	1.61038	4.06557	3.06285	7.19718	2.65972	3.55385	3.01395	2.73464	2.44836	1.59736	5.74944	4.48927	0.287147	7.91892	6.64561	2.43033	3.05394	3.03155	3.40076	3.21022	3.43097	2.09637	3.14647	2.52942	2.57037	3.11247	3.05433
	9.9607	26.5002	30.2744	24.2332	17.4236	9.83665	13.8483	10.1612	2.09982	-0.949607	0.283166	-0.640588	0.207865	-0.808032	-0.276773	0.0207821	0.0738766	0.643089	2.42247	1.86535	1.24738	0.318766	1.52977	4.0361	3.03409	8.00698	2.42041	3.05701	2.24471	2.04493	2.13634	1.24063	5.62846	4.71072	0.463206	7.12574	5.79113	2.25388	2.95751	2.82007	3.17325	2.65819	2.91007	1.7398	3.01147	2.35198	2.37265	3.00432	2.70996
	10.0221	26.8237	28.7842	22.4912	14.8461	8.10683	9.75896	7.62352	0.783071	-1.84627	-0.137297	-0.836096	-0.0407539	-1.10505	-0.465477	-0.0520497	0.0283607	0.534494	2.06394	1.83302	1.24532	0.571682	1.54155	3.83095	2.91142	8.6119	2.22521	2.43787	1.56985	1.53875	1.78173	0.925864	5.31815	5.03463	0.62892	6.18082	4.94777	1.96037	2.79065	2.39029	2.90887	2.45299	2.48644	1.2853	2.92201	2.1343	2.01681	2.71844	2.50395
	10.0836	25.7456	25.8162	19.8917	11.8054	6.33697	6.17993	5.14189	-0.255984	-2.42254	-0.633707	-1.17232	-0.420456	-1.32636	-0.557252	-0.393392	-0.072863	0.689431	1.81452	1.91972	1.25946	0.523429	1.48386	3.49376	2.50569	8.96181	1.87844	1.75258	1.2143	1.0089	1.4969	0.758983	4.99562	5.0608	0.861611	5.16118	4.05237	1.70194	2.60437	2.12808	2.69334	2.01363	2.08211	0.855798	2.69673	1.84192	1.8914	2.35153	2.17645
	10.145	23.7367	21.631	16.7181	8.71952	4.48204	2.9117	2.93735	-1.08603	-2.98033	-1.10301	-1.49192	-0.628294	-1.63707	-0.706695	-0.516167	-0.124799	0.602179	1.51703	1.90097	1.19959	0.502902	1.34839	3.08929	2.06977	8.79253	1.62029	1.30111	0.927669	0.629241	1.48892	0.621994	4.50466	4.97293	0.938181	4.11639	3.14361	1.33079	2.525	1.66114	2.35057	1.63523	1.67199	0.456225	2.43265	1.61225	1.50208	1.94818	1.7724
	10.2064	21.0481	17.221	13.0849	5.77654	2.73317	0.391536	0.957223	-1.9144	-3.32854	-1.40195	-1.75352	-0.86984	-1.88078	-0.908186	-0.705571	-0.163707	0.475919	1.24545	1.90145	1.09753	0.347766	1.32635	2.52541	1.58608	8.09173	1.33561	1.0279	0.775822	0.42654	1.36378	0.481066	3.82481	4.72513	1.00051	3.00873	2.33695	0.974168	2.33597	1.31154	1.9266	1.17069	1.28279	0.110569	2.18534	1.14741	1.05643	1.56608	1.51021
	10.2679	17.7988	12.7943	9.59871	3.11436	1.23468	-1.808	-0.774783	-2.62469	-3.52353	-1.8341	-1.92438	-1.12782	-2.07511	-1.01053	-0.856113	-0.0495319	0.252612	0.961699	1.74055	0.959585	0.199931	1.28102	1.98037	1.10511	6.92885	1.04147	0.842052	0.566039	0.19533	1.11512	0.396992	3.18535	4.23634	0.839451	1.90417	1.66203	0.666528	2.03172	0.93686	1.57529	0.753647	0.899958	-0.152685	1.87377	0.902137	0.749961	1.26125	1.11384
	10.3293	14.3906	8.68411	6.30761	0.871252	-0.0261505	-3.33645	-1.99094	-3.0476	-3.80619	-2.2162	-2.28903	-1.2622	-2.1555	-1.11865	-0.911936	0.0764687	0.0897587	0.791852	1.69083	0.842161	-0.0120781	1.08801	1.43992	0.866882	5.65645	0.840278	0.564461	0.515042	0.0425637	1.16316	0.258352	2.41058	3.55845	0.628298	1.04819	1.00829	0.36147	1.76913	0.553094	1.25982	0.322717	0.572191	-0.364417	1.59127	0.59979	0.422128	0.901582	0.767331
	10.3908	10.8594	4.96018	3.50559	-1.03427	-1.30247	-4.66242	-3.15778	-3.48541	-3.97125	-2.40921	-2.47914	-1.30973	-2.38037	-1.25546	-1.17365	0.0179161	0.0221382	0.44408	1.47363	0.77207	-0.00433087	1.05825	1.14264	0.712573	4.22269	0.713433	0.433424	0.420088	-0.102837	0.999239	0.224018	1.61205	2.82279	0.53754	0.240307	0.409184	0.159021	1.52742	0.107975	0.845129	-0.0708077	0.255495	-0.594197	1.48508	0.287032	0.0905838	0.552337	0.362173
	10.4522	7.38545	1.75445	1.03204	-2.6818	-2.33847	-5.53636	-3.87785	-3.68971	-3.84535	-2.65884	-2.4813	-1.41615	-2.51205	-1.27622	-1.13071	0.104078	-0.058186	0.247113	1.33079	0.778553	-0.127188	0.852591	0.767841	0.657341	2.95151	0.49987	0.263697	0.356823	-0.318652	0.756371	0.101257	0.789823	2.12398	0.470446	-0.511908	0.00652812	0.0717174	1.24078	-0.270508	0.583073	-0.440827	0.00464972	-0.604037	1.21227	0.124965	-0.179016	0.251915	0.0482826
	10.5136	4.12895	-0.814904	-0.991589	-3.92568	-3.23448	-6.18635	-4.59798	-3.8539	-3.90023	-2.67892	-2.51495	-1.40349	-2.45956	-1.24161	-1.1141	-0.00808336	-0.224426	0.103413	1.06971	0.683601	-0.039613	0.907768	0.564321	0.457106	1.7837	0.35768	-0.0191307	0.131877	-0.447597	0.55483	-0.144458	0.110569	1.39092	0.363296	-1.02369	-0.397086	-0.00912856	0.979226	-0.551879	0.327883	-0.735548	-0.231158	-0.787054	1.00972	-0.0345963	-0.44182	-0.100832	-0.19536
	10.5751	1.2998	-2.87277	-2.92421	-4.92588	-3.68709	-6.66682	-5.00985	-4.05305	-3.99397	-2.82242	-2.56777	-1.56905	-2.52207	-1.21896	-1.00051	-0.169536	-0.27224	-0.0701385	0.845125	0.705222	-0.100832	0.657867	0.214072	0.358624	0.763261	0.278167	-0.255454	-0.0297138	-0.655088	0.331476	-0.188394	-0.508958	0.711094	0.276978	-1.47892	-0.687584	-0.10744	0.661517	-0.81902	0.0906887	-1.0161	-0.388538	-0.886558	0.763252	-0.164411	-0.609671	-0.277356	-0.460851
	10.6365	-1.12091	-4.49113	-4.35788	-5.67991	-4.25585	-6.83292	-5.32751	-4.11588	-3.99474	-2.90561	-2.51029	-1.43625	-2.4704	-1.1726	-0.866529	-0.458628	-0.349141	-0.223571	0.665629	0.669654	0.0915554	0.589949	0.127355	0.255037	-0.130656	0.197936	-0.500877	-0.112268	-0.779375	0.264256	-0.375117	-1.01088	0.177689	0.246052	-1.82213	-1.04254	-0.235065	0.373038	-1.10736	-0.0435127	-1.19464	-0.633974	-1.00568	0.716433	-0.286061	-0.742924	-0.537821	-0.722209
	10.698	-3.33612	-5.74766	-5.57511	-6.29122	-4.54628	-6.89982	-5.50513	-4.13236	-3.90518	-2.81261	-2.42517	-1.39898	-2.29795	-1.05942	-0.691487	-0.420001	-0.615014	-0.329408	0.513298	0.605008	0.0191189	0.370201	-0.111584	0.186408	-0.828459	0.0449886	-0.612787	-0.270327	-0.811924	-0.0752964	-0.407826	-1.41991	-0.263469	0.210308	-2.08756	-1.26891	-0.245601	0.1767	-1.34574	-0.128496	-1.31286	-0.738529	-1.13027	0.500952	-0.484487	-0.874058	-0.709411	-0.906361
	10.7594	-4.94197	-6.73195	-6.30907	-6.42494	-4.8289	-6.82487	-5.65549	-3.9825	-3.84567	-2.79039	-2.26313	-1.31286	-2.16297	-0.918936	-0.461645	-0.569772	-0.644812	-0.46419	0.300652	0.492147	0.158082	0.210819	-0.176923	0.148371	-1.31165	-0.13097	-0.806314	-0.457223	-0.915424	-0.0454956	-0.660452	-1.72238	-0.517679	0.0965923	-2.40279	-1.59525	-0.487554	-0.124436	-1.50333	-0.380571	-1.49396	-0.862553	-1.21211	0.32756	-0.619484	-0.964308	-0.740864	-1.12038
	10.8208	-6.12057	-7.38346	-6.89767	-6.57598	-4.90071	-6.6167	-5.56225	-3.93384	-3.73124	-2.72181	-2.11365	-1.14141	-2.12764	-0.746134	-0.30966	-0.720716	-0.819761	-0.452879	0.0496403	0.404531	0.26627	0.144734	-0.419844	-0.0394493	-1.75527	-0.100949	-1.04129	-0.637378	-0.993762	-0.0969143	-0.724226	-1.96168	-0.903483	-0.0131851	-2.6043	-1.76204	-0.699331	-0.194581	-1.48554	-0.430711	-1.60157	-0.920571	-1.43187	0.161764	-0.728184	-0.953539	-0.931914	-1.24073
	10.8823	-7.02797	-7.66072	-7.3362	-6.63803	-4.96965	-6.29452	-5.44822	-3.77013	-3.59366	-2.49582	-1.97794	-1.0172	-2.03742	-0.754323	-0.163282	-0.869417	-1.01403	-0.392877	-0.0595379	0.449111	0.304066	-0.0946194	-0.38196	-0.149474	-2.07296	-0.0786587	-1.13035	-0.788334	-1.07081	-0.266247	-0.85496	-2.06609	-1.16338	-0.22155	-2.7859	-1.91797	-0.988808	-0.420087	-1.79985	-0.567571	-1.69187	-0.920596	-1.47854	-0.00885085	-0.871577	-1.11136	-0.865659	-1.2285
	10.9437	-7.71998	-7.88073	-7.60645	-6.59072	-4.83995	-6.15733	-5.38049	-3.55358	-3.32167	-2.37907	-1.87442	-0.771944	-1.92614	-0.549843	0.0210514	-0.963015	-1.08815	-0.268747	-0.418035	0.449408	0.350983	-0.268311	-0.533188	-0.16194	-2.43028	-0.167366	-1.19024	-0.864072	-1.08602	-0.408772	-1.0149	-2.21021	-1.28799	-0.429958	-2.82573	-2.10222	-0.957028	-0.47638	-1.8519	-0.56545	-1.69885	-0.962735	-1.60804	-0.103109	-0.9841	-1.16521	-0.912914	-1.40139
[truncated: 13 more columns]

## Sheet: panel G
Dataset no:	1		2		3		4		5		6		7		8		9		10		11		12		13		14		15		16		17		18		19		20		21		22		23		24
Cell no:	1		1		2		2		2		2		3		3		4		4		4		4		4		4		4		5		5		5		5		6		6		7		7		8
	ITD re. trough (ms)	Spikes/click	ITD re. trough (ms)	Spikes/click	ITD re. trough (ms)	Spikes/click	ITD re. trough (ms)	Spikes/click	ITD re. trough (ms)	Spikes/click	ITD re. trough (ms)	Spikes/click	ITD re. trough (ms)	Spikes/click	ITD re. trough (ms)		ITD re. trough (ms)	Spikes/click	ITD re. trough (ms)	Spikes/click	ITD re. trough (ms)	Spikes/click	ITD re. trough (ms)	Spikes/click	ITD re. trough (ms)	Spikes/click	ITD re. trough (ms)	Spikes/click	ITD re. trough (ms)	Spikes/click	ITD re. trough (ms)		ITD re. trough (ms)	Spikes/click	ITD re. trough (ms)	Spikes/click	ITD re. trough (ms)	Spikes/click	ITD re. trough (ms)	Spikes/click	ITD re. trough (ms)	Spikes/click	ITD re. trough (ms)	Spikes/click	ITD re. trough (ms)	Spikes/click	ITD re. trough (ms)	Spikes/click
	-1.5	1	-1.5	1	-1.5	1	-1.5	0.45	-1.05	0.7	-0.95	0.9	-1.35	1	-0.25	0.625	-1	1.7	-1.1	0	-0.8	1.7	-0.9	1.1	-0.9	2	-0.45	0	-0.6	1	-0.9	0.9	-0.85	0.925	-0.65	0.3375	-0.65	1	-1.5	1	-1.35	1	-1.4	0.75	-1.5	1	-1.5	1.1
	-1.45	1	-1.45	1	-1.45	1	-1.45	0.475	-1	0.65	-0.9	0.875	-1.3	1	-0.2	0.4875	-0.95	1.75	-1.05	0	-0.75	1.575	-0.85	1.35	-0.85	1.875	-0.4	0	-0.55	1	-0.85	0.90625	-0.8	0.925	-0.6	0.3	-0.6	1	-1.45	1	-1.3	1	-1.35	0.7875	-1.45	1	-1.45	1.1
	-1.4	1	-1.4	1	-1.4	1	-1.4	0.45	-0.95	0.575	-0.85	0.875	-1.25	1	-0.15	0.325	-0.9	1.7	-1	1.19209e-08	-0.7	1.4	-0.8	1.5	-0.8	1.5	-0.35	0	-0.5	1	-0.8	0.925	-0.75	0.9375	-0.55	0.1375	-0.55	0.9875	-1.4	1	-1.25	1	-1.3	0.8	-1.4	1	-1.4	1.1
	-1.35	1	-1.35	1	-1.35	1	-1.35	0.45	-0.9	0.65	-0.8	0.775	-1.2	1	-0.1	0.1375	-0.85	1.675	-0.95	0.05	-0.65	1.225	-0.75	1.575	-0.75	1.25	-0.3	0	-0.45	1	-0.75	0.95	-0.7	0.95	-0.5	0.15	-0.5	0.975	-1.35	1	-1.2	1	-1.25	0.825	-1.35	1	-1.35	1.075
	-1.3	1	-1.3	1	-1.3	1	-1.3	0.55	-0.85	0.725	-0.75	0.75	-1.15	1	-0.05	0.025	-0.8	1.8	-0.9	0.2	-0.6	1.1	-0.7	1.6	-0.7	1.5	-0.25	0	-0.4	1	-0.7	0.975	-0.65	0.9625	-0.45	0.3	-0.45	0.9625	-1.3	1	-1.15	1	-1.2	0.9	-1.3	1	-1.3	1.025
	-1.25	1	-1.25	1	-1.25	1	-1.25	0.6375	-0.8	0.675	-0.7	0.825	-1.1	1	0	0	-0.75	1.925	-0.85	0.3	-0.55	1.05	-0.65	1.55	-0.65	1.875	-0.2	0	-0.35	1	-0.65	0.9875	-0.6	0.9875	-0.4	0.4625	-0.4	0.95	-1.25	1	-1.1	1	-1.15	0.925	-1.25	1	-1.25	1.05
	-1.2	1	-1.2	1.025	-1.2	1	-1.2	0.6	-0.75	0.5	-0.65	0.85	-1.05	1	0.05	3.72529e-09	-0.7	1.9	-0.8	0.2	-0.5	1.1	-0.6	1.4	-0.6	2	-0.15	0	-0.3	1	-0.6	0.975	-0.55	0.975	-0.35	0.45	-0.35	0.9125	-1.2	1	-1.05	1	-1.1	0.8	-1.2	1	-1.2	1.125
	-1.15	1	-1.15	1.05	-1.15	1	-1.15	0.5	-0.7	0.4	-0.6	0.875	-1	1	0.1	0.0125	-0.65	1.775	-0.75	0.075	-0.45	1.125	-0.55	1.25	-0.55	1.875	-0.1	0	-0.25	1	-0.55	0.95625	-0.5	0.925	-0.3	0.2125	-0.3	0.8375	-1.15	1	-1	1	-1.05	0.6625	-1.15	1	-1.15	1.1
	-1.1	1	-1.1	1.025	-1.1	1	-1.1	0.4	-0.65	0.45	-0.55	0.9	-0.95	1	0.15	0.025	-0.6	1.6	-0.7	0.1	-0.4	1	-0.5	1.2	-0.5	1.5	-0.05	0	-0.2	1	-0.5	0.95	-0.45	0.9	-0.25	0.0625	-0.25	0.75	-1.1	1	-0.95	1	-1	0.65	-1.1	1	-1.1	1.075
	-1.05	1	-1.05	1	-1.05	1	-1.05	0.3375	-0.6	0.5	-0.5	0.8	-0.9	1	0.2	0.0125	-0.55	1.475	-0.65	0.2	-0.35	0.775	-0.45	1.175	-0.45	1.25	0	0	-0.15	0.875	-0.45	0.925	-0.4	0.9	-0.2	0.025	-0.2	0.525	-1.05	1	-0.9	1	-0.95	0.6875	-1.05	1	-1.05	1.1
	-1	1	-1	1	-1	1	-1	0.35	-0.55	0.375	-0.45	0.6	-0.85	1	0.25	0	-0.5	1.5	-0.6	0.3	-0.3	0.5	-0.4	1.1	-0.4	1.5	0.05	0	-0.1	0.5	-0.4	0.85	-0.35	0.9	-0.15	0.0125	-0.15	0.2375	-1	1	-0.85	1	-0.9	0.7	-1	1	-1	1.05
	-0.95	1	-0.95	1	-0.95	1	-0.95	0.3625	-0.5	0.2	-0.4	0.5	-0.8	1	0.3	0	-0.45	1.525	-0.55	0.325	-0.25	0.275	-0.35	1	-0.35	1.75	0.1	0	-0.05	0.125	-0.35	0.73125	-0.3	0.85	-0.1	0.025	-0.1	0.0875001	-0.95	1	-0.8	1	-0.85	0.7	-0.95	1	-0.95	1
	-0.9	1	-0.9	1	-0.9	1	-0.9	0.3	-0.45	0.15	-0.35	0.425	-0.75	1	0.35	0	-0.4	1.4	-0.5	0.2	-0.2	0.2	-0.3	0.9	-0.3	1.5	0.15	0	0	0	-0.3	0.575	-0.25	0.6625	-0.05	0.0125	-0.05	0.025	-0.9	1	-0.75	1	-0.8	0.7	-0.9	1	-0.9	1.05
	-0.85	1	-0.85	1	-0.85	1	-0.85	0.25	-0.4	0.15	-0.3	0.3	-0.7	1	0.4	0	-0.35	1.225	-0.45	0.05	-0.15	0.175	-0.25	0.8	-0.25	1.125	0.2	0	0.05	0	-0.25	0.40625	-0.2	0.425	0	0	0	1.49012e-08	-0.85	1	-0.7	1	-0.75	0.7125	-0.85	1	-0.85	1.15
	-0.8	1	-0.8	1	-0.8	1	-0.8	0.3	-0.35	0.175	-0.25	0.25	-0.65	1	0.45	1.93715e-08	-0.3	1.1	-0.4	7.15256e-08	-0.1	0.0999999	-0.2	0.7	-0.2	1	0.25	0	0.1	0	-0.2	0.25	-0.15	0.275	0.05	2.38419e-08	0.05	0.0125	-0.8	1	-0.65	1	-0.7	0.75	-0.8	1	-0.8	1.175
	-0.75	1	-0.75	1	-0.75	1	-0.75	0.3875	-0.3	0.15	-0.2	0.175	-0.6	1	0.5	0.025	-0.25	0.925	-0.35	0.0750002	-0.05	0.025	-0.15	0.55	-0.15	0.875	0.3	0	0.15	0	-0.15	0.125	-0.1	0.15	0.1	0.025	0.1	0.0375	-0.75	1	-0.6	1	-0.65	0.8	-0.75	1	-0.75	1.1
	-0.7	1	-0.7	1	-0.7	1	-0.7	0.45	-0.25	0.05	-0.15	0.075	-0.55	1	0.55	0.075	-0.2	0.6	-0.3	0.3	0	0	-0.1	0.3	-0.1	0.5	0.35	0	0.2	0	-0.1	0.05	-0.05	0.0375	0.15	0.0625001	0.15	0.0375	-0.7	1	-0.55	1	-0.6	0.85	-0.7	1	-0.7	1.05
	-0.65	1	-0.65	1	-0.65	1	-0.65	0.5	-0.2	2.83122e-08	-0.1	0.05	-0.5	0.9625	0.6	0.1	-0.15	0.275	-0.25	0.475	0.05	0	-0.05	0.0749999	-0.05	0.125	0.4	0	0.25	0	-0.05	0.0125	0	0	0.2	0.125	0.2	0.025	-0.65	0.99375	-0.5	1	-0.55	0.875	-0.65	1	-0.65	1.05
	-0.6	1	-0.6	1	-0.6	1	-0.6	0.55	-0.15	0.025	-0.05	0.025	-0.45	0.85	0.65	0.1375	-0.1	0.0999999	-0.2	0.4	0.1	0	0	0	0	0	0.45	0	0.3	0	0	0	0.05	0	0.25	0.325	0.25	0.05	-0.6	0.975	-0.45	1	-0.5	0.85	-0.6	1	-0.6	1.025
	-0.55	1	-0.55	1	-0.55	1	-0.55	0.5625	-0.1	0.05	0	0	-0.4	0.7375	0.7	0.3125	-0.05	0.025	-0.15	0.225	0.15	0	0.05	0	0.05	0	0.5	0	0.35	0	0.05	0	0.1	0	0.3	0.6125	0.3	0.1	-0.55	0.95	-0.4	1	-0.45	0.8	-0.55	1.0125	-0.55	0.875
	-0.5	1	-0.5	1	-0.5	1	-0.5	0.5	-0.05	0.025	0.05	0	-0.35	0.7	0.75	0.6	0	0	-0.1	0.0999999	0.2	0	0.1	0	0.1	0	0.55	0	0.4	0	0.1	0	0.15	0	0.35	0.8125	0.35	0.3125	-0.5	0.925	-0.35	0.9	-0.4	0.75	-0.5	1.05	-0.5	0.7
	-0.45	1	-0.45	1	-0.45	1	-0.45	0.4375	0	0	0.1	0	-0.3	0.65	0.8	0.8125	0.05	0	-0.05	0.025	0.25	0	0.15	0	0.15	0	0.6	0	0.45	0	0.15	0	0.2	0	0.4	0.9375	0.4	0.625	-0.45	0.9	-0.3	0.7	-0.35	0.7125	-0.45	1.075	-0.45	0.7
	-0.4	1	-0.4	1	-0.4	1	-0.4	0.45	0.05	0	0.15	0	-0.25	0.5	0.85	0.9125	0.1	0	0	0	0.3	0	0.2	0	0.2	0	0.65	0	0.5	0	0.2	8.9407e-09	0.25	0	0.45	0.9875	0.45	0.725	-0.4	0.875	-0.25	0.5	-0.3	0.7	-0.4	1.05	-0.4	0.6
	-0.35	0.9875	-0.35	1	-0.35	1	-0.35	0.4625	0.1	0	0.2	0	-0.2	0.325	0.9	0.975	0.15	0	0.05	0	0.35	0	0.25	0	0.25	0	0.7	0	0.55	0	0.25	0.00625003	0.3	1.86265e-08	0.5	0.9625	0.5	0.7875	-0.35	0.85	-0.2	0.275	-0.25	0.65	-0.35	0.9375	-0.35	0.35
	-0.3	0.95	-0.3	1	-0.3	1	-0.3	0.4	0.15	0	0.25	0	-0.15	0.2	0.95	1	0.2	0	0.1	3.8743e-08	0.4	0	0.3	0	0.3	0	0.75	0	0.6	0	0.3	0.025	0.35	0.0125001	0.55	1.0125	0.55	0.95	-0.3	0.825	-0.15	0.15	-0.2	0.5	-0.3	0.7	-0.3	0.25
	-0.25	0.849999	-0.25	1	-0.25	0.9	-0.25	0.3125	0.2	0	0.3	0	-0.1	0.1125			0.25	0	0.15	0.0250001	0.45	0	0.35	0	0.35	0	0.8	0	0.65	0	0.35	0.05	0.4	0.0750001	0.6	1.0625	0.6	1.0125	-0.25	0.775	-0.1	0.125	-0.15	0.3125	-0.25	0.45	-0.25	0.25
	-0.2	0.649999	-0.2	0.949999	-0.2	0.8	-0.2	0.25	0.25	0	0.35	0	-0.05	0.05			0.3	0	0.2	0.1	0.5	0	0.4	0	0.4	0	0.85	0	0.7	0	0.4	0.0750001	0.45	0.1375	0.65	1.0375	0.65	0.9875	-0.2	0.674999	-0.05	0.05	-0.1	0.15	-0.2	0.3	-0.2	0.225
	-0.15	0.412499	-0.15	0.724998	-0.15	0.699999	-0.15	0.1875	0.3	0	0.4	0	0	0.025			0.35	0	0.25	0.15	0.55	0	0.45	0	0.45	0	0.9	0	0.75	0	0.45	0.13125	0.5	0.2	0.7	1.025	0.7	1.025	-0.15	0.549999	0	0.0250002	-0.05	0.0374999	-0.15	0.2	-0.15	0.15
	-0.1	0.2	-0.1	0.349998	-0.1	0.349999	-0.1	0.0999998	0.35	0	0.45	0	0.05	0.05			0.4	0	0.3	0.1	0.6	0	0.5	0	0.5	0	0.95	0	0.8	0	0.5	0.25	0.55	0.3375			0.75	1.1125	-0.1	0.425	0.05	0.125	0	0	-0.1	0.0999999	-0.1	0.0749999
	-0.05	0.0499998	-0.05	0.0749996	-0.05	0.0499999	-0.05	0.0249999	0.4	0	0.5	0	0.1	0.075			0.45	0	0.35	0.0250001	0.65	0	0.55	0	0.55	0	1	0	0.85	0	0.55	0.4	0.6	0.5			0.8	1.125	-0.05	0.33125	0.1	0.2	0.05	0	-0.05	0.025	-0.05	0.0249999
	0	0	0	0	0	0	0	0	0.45	0	0.55	0	0.15	0.05			0.5	0	0.4	9.23871e-08	0.7	0	0.6	0	0.6	0	1.05	0	0.9	0	0.6	0.55	0.65	0.6625			0.85	1.0875	0	0.3	0.15	0.175	0.1	0	0	0	0	6.10948e-08
	0.05	0	0.05	0	0.05	0	0.05	0	0.5	0	0.6	0	0.2	0.0375001			0.55	0	0.45	0.0250001	0.75	0	0.65	0	0.65	0	1.1	0	0.95	0	0.65	0.6875	0.7	0.8125					0.05	0.3	0.2	0.175	0.15	0	0.05	0	0.05	0.0250001
	0.1	0	0.1	0	0.1	0	0.1	0	0.55	0	0.65	0	0.25	0.1			0.6	0	0.5	0.1	0.8	0	0.7	0	0.7	0	1.15	0	1	0	0.7	0.8	0.75	0.8875					0.1	0.3	0.25	0.2	0.2	0	0.1	5.66243e-08	0.1	0.0500001
	0.15	0	0.15	0	0.15	0	0.15	0	0.6	0	0.7	0	0.3	0.2375			0.65	0	0.55	0.15	0.85	0	0.75	0	0.75	0	1.2	0	1.05	0	0.75	0.88125	0.8	0.9					0.15	0.3125	0.3	0.325	0.25	0	0.15	0.0250001	0.15	0.0750001
	0.2	0	0.2	0	0.2	0	0.2	0	0.65	0	0.75	0	0.35	0.45			0.7	5.36442e-08	0.6	0.0999999	0.9	0	0.8	0	0.8	0	1.25	0	1.1	0	0.8	0.925	0.85	0.925					0.2	0.35	0.35	0.5	0.3	0	0.2	0.1	0.2	0.125
	0.25	0.0375	0.25	0.0250005	0.25	0	0.25	0	0.7	0	0.8	0	0.4	0.6625			0.75	0.0250002	0.65	0.0500001	0.95	0	0.85	0	0.85	0	1.3	0	1.15	0	0.85	0.9375	0.9	0.925					0.25	0.4	0.4	0.5	0.35	0	0.25	0.2	0.25	0.15
	0.3	0.15	0.3	0.150001	0.3	0	0.3	0	0.75	0	0.85	0	0.45	0.8			0.8	0.1	0.7	0.1	1	0	0.9	0	0.9	0	1.35	2.83122e-07	1.2	0	0.9	0.925	0.95	0.8875					0.3	0.45	0.45	0.525	0.4	0	0.3	0.3	0.3	0.15
	0.35	0.312501	0.35	0.400001	0.35	0	0.35	0	0.8	0	0.9	0	0.5	0.8875			0.85	0.15	0.75	0.225	1.05	0	0.95	0	0.95	0	1.4	0.125001	1.25	0	0.95	0.9	1	0.8625					0.35	0.5	0.5	0.55	0.45	0	0.35	0.425	0.35	0.175
	0.4	0.500001	0.4	0.625001	0.4	0	0.4	0	0.85	0	0.95	0	0.55	0.95			0.9	0.0999998	0.8	0.4	1.1	0	1	0	1	0	1.45	0.500001	1.3	0	1	0.875	1.05	0.825					0.4	0.55	0.55	0.45	0.5	0	0.4	0.6	0.4	0.25
	0.45	0.675	0.45	0.775001	0.45	0	0.45	0	0.9	0	1	0	0.6	0.9875			0.95	0.0249999	0.85	0.475	1.15	0	1.05	0	1.05	0	1.5	0.749999	1.35	0	1.05	0.85625	1.1	0.7875					0.45	0.6	0.6	0.550001	0.55	0	0.45	0.775	0.45	0.25
	0.5	0.8	0.5	0.925	0.5	0	0.5	0	0.95	0	1.05	0	0.65	1			1	6.25849e-08	0.9	0.3	1.2	0	1.1	0	1.1	0			1.4	0	1.1	0.85	1.15	0.7625					0.5	0.65	0.65	0.825	0.6	0	0.5	0.9	0.5	0.175
	0.55	0.8875	0.55	0.975	0.55	0	0.55	0	1	0	1.1	6.4075e-08	0.7	1			1.05	0.0250002	0.95	0.1	1.25	0	1.15	0	1.15	0			1.45	0	1.15	0.8125	1.2	0.7125					0.55	0.69375	0.7	0.975	0.65	0	0.55	0.975	0.55	0.2
	0.6	0.95	0.6	0.95	0.6	0	0.6	0	1.05	0	1.15	0.0250001	0.75	1			1.1	0.1	1	0.1	1.3	0	1.2	0	1.2	0			1.5	0	1.2	0.7	1.25	0.625					0.6	0.725	0.75	1	0.7	0	0.6	1	0.6	0.3
	0.65	0.9875	0.65	0.975	0.65	0	0.65	0	1.1	0	1.2	0.0499999	0.8	1			1.15	0.15	1.05	0.175	1.35	0	1.25	0	1.25	0					1.25	0.575	1.3	0.55					0.65	0.75	0.8	1	0.75	0	0.65	1	0.65	0.450001
	0.7	1	0.7	1	0.7	0	0.7	0	1.15	0	1.25	0.0249999	0.85	1			1.2	0.0999998	1.1	0.2	1.4	0	1.3	0	1.3	0					1.3	0.5	1.35	0.475					0.7	0.775	0.85	0.975	0.8	3.42727e-08	0.7	1	0.7	0.7
	0.75	1	0.75	1	0.75	0	0.75	0	1.2	0	1.3	0	0.9	1			1.25	0.0249999	1.15	0.175	1.45	0	1.35	0	1.35	0					1.35	0.425	1.4	0.35					0.75	0.8	0.9	0.95	0.85	0.0125001	0.75	1	0.75	0.85
	0.8	1	0.8	1	0.8	0	0.8	0	1.25	0	1.35	0	0.95	1			1.3	0	1.2	0.0999999	1.5	0	1.4	0	1.4	0					1.4	0.3	1.45	0.25					0.8	0.825	0.95	0.975	0.9	0.0500002	0.8	1	0.8	0.775
	0.85	1	0.85	1	0.85	0	0.85	0	1.3	0	1.4	0	1	1			1.35	0	1.25	0.0500001			1.45	0	1.45	0					1.45	0.18125	1.5	0.2625					0.85	0.85	1	1	0.95	0.1125	0.85	1	0.85	0.65
	0.9	1	0.9	1	0.9	1.54972e-07	0.9	0	1.35	0	1.45	7.45058e-08	1.05	1			1.4	0	1.3	0.1			1.5	0	1.5	0					1.5	0.125							0.9	0.875	1.05	1	1	0.2	0.9	1	0.9	0.650001
	0.95	1	0.95	1	0.95	0.0500002	0.95	0	1.4	7.59959e-08	1.5	0.0250005	1.1	1			1.45	0	1.35	0.175																			0.95	0.9	1.1	1	1.05	0.2875	0.95	1	0.95	0.825001
	1	1	1	1	1	0.1	1	0	1.45	0.0250001			1.15	1			1.5	0	1.4	0.2																			1	0.925	1.15	1	1.1	0.35	1	1	1	0.975
	1.05	1	1.05	1	1.05	0.1	1.05	0	1.5	0.05			1.2	1					1.45	0.2																			1.05	0.95	1.2	1	1.15	0.3875	1.05	1	1.05	0.975
	1.1	1	1.1	1	1.1	0.200001	1.1	0					1.25	1					1.5	0.2																			1.1	0.975	1.25	1	1.2	0.4	1.1	1	1.1	0.925
	1.15	1	1.15	1	1.15	0.450001	1.15	0					1.3	1																									1.15	0.99375	1.3	1	1.25	0.462501	1.15	1	1.15	0.9
	1.2	1			1.2	0.750001	1.2	0					1.35	1																									1.2	1	1.35	1	1.3	0.650001	1.2	1	1.2	0.925
	1.25	1			1.25	0.95	1.25	0					1.4	1																									1.25	1	1.4	1	1.35	0.8375	1.25	1	1.25	0.95
	1.3	1			1.3	1	1.3	0					1.45	1																									1.3	1	1.45	1	1.4	0.9	1.3	1	1.3	1
	1.35	1			1.35	1	1.35	0					1.5	1																									1.35	1	1.5	1	1.45	0.875	1.35	1	1.35	1.05
	1.4	1			1.4	1	1.4	0																															1.4	1			1.5	0.8	1.4	1	1.4	1
	1.45	1			1.45	0.949999	1.45	0																															1.45	1					1.45	1	1.45	1
	1.5	1			1.5	0.8	1.5	0																															1.5	1					1.5	1	1.5	1.125

## Sheet: panel H
Dataset no:	1		2		3		4		5		6		7		8		9		10		11		12		13		14		15		16		17		18		19		20		21		22		23		24		25
Cell no:	1		2		2		2		3		3		4		4		4		5		5		5		5		6		6		6		6		6		6		6		6		7		7		7		7
	ITD re. trough (ms)	Spikes/click	ITD re. trough (ms)	Spikes/click	ITD re. trough (ms)	Spikes/click	ITD re. trough (ms)	Spikes/click	ITD re. trough (ms)	Spikes/click	ITD re. trough (ms)	Spikes/click	ITD re. trough (ms)	Spikes/click	ITD re. trough (ms)		ITD re. trough (ms)	Spikes/click	ITD re. trough (ms)	Spikes/click	ITD re. trough (ms)	Spikes/click	ITD re. trough (ms)	Spikes/click	ITD re. trough (ms)	Spikes/click	ITD re. trough (ms)	Spikes/click	ITD re. trough (ms)	Spikes/click	ITD re. trough (ms)		ITD re. trough (ms)	Spikes/click	ITD re. trough (ms)	Spikes/click	ITD re. trough (ms)	Spikes/click	ITD re. trough (ms)	Spikes/click	ITD re. trough (ms)	Spikes/click	ITD re. trough (ms)	Spikes/click	ITD re. trough (ms)	Spikes/click	ITD re. trough (ms)	Spikes/click
	-1.5	0	-0.45	0	-0.45	0	-0.45	0	-0.85	1.025	-0.6	0.44375	-0.1	0.05	-0.95	1	-0.45	0.95	-0.4	0.025	0	0	-0.4	0.05	-1.5	0.32	-1.5	0.4	-1.5	0.85	-1.5	0.525	-1.25	0.375	-1.25	0.975	-1.25	1	-1.4	0.35	-0.75	0.8	-1.4	0.025	-1.5	1.15	-1.5	1.025	-1
	-1.45	0	-0.4	0	-0.4	0	-0.4	0	-0.8	1.0125	-0.55	0.46875	-0.05	0.025	-0.9	1	-0.4	0.85	-0.35	0.04375	0.05	0	-0.35	0.04125	-1.45	0.365	-1.45	0.4	-1.45	0.95	-1.45	0.5	-1.2	0.4375	-1.2	0.95	-1.2	1	-1.35	0.275	-0.7	0.7	-1.35	0.05	-1.45	1.175	-1.45	1.05	-0.95
	-1.4	0	-0.35	0	-0.35	0	-0.35	0	-0.75	1	-0.5	0.41875	0	0	-0.85	1	-0.35	0.775	-0.3	0.05	0.1	0	-0.3	0.035	-1.4	0.41	-1.4	0.375	-1.4	0.95	-1.4	0.55	-1.15	0.416667	-1.15	0.875	-1.15	1	-1.3	0.25	-0.65	0.6125	-1.3	0.075	-1.4	1.1625	-1.4	1.025	-0.9
	-1.35	0	-0.3	0	-0.3	0	-0.3	0	-0.7	1	-0.45	0.45	0.05	0	-0.8	1	-0.3	0.725	-0.25	0.05625	0.15	0	-0.25	0.035	-1.35	0.385	-1.35	0.3	-1.35	0.9125	-1.35	0.525	-1.1	0.470833	-1.1	0.8125	-1.1	0.9875	-1.25	0.275	-0.6	0.5625	-1.25	0.1	-1.35	1.075	-1.35	1	-0.85
	-1.3	9.4374e-08	-0.25	0	-0.25	0	-0.25	0	-0.65	1	-0.4	0.45	0.1	0	-0.75	1	-0.25	0.7	-0.2	0.075	0.2	0	-0.2	0.045	-1.3	0.37	-1.3	0.2375	-1.3	0.9	-1.3	0.575	-1.05	0.541667	-1.05	0.775	-1.05	0.975	-1.2	0.2125	-0.55	0.5	-1.2	0.125	-1.3	0.95	-1.3	1	-0.8
	-1.25	0.041667	-0.2	0	-0.2	0	-0.2	0	-0.6	1	-0.35	0.33125	0.15	0	-0.7	1	-0.2	0.55	-0.15	0.08125	0.25	0	-0.15	0.05125	-1.25	0.405	-1.25	0.25	-1.25	0.8875	-1.25	0.7	-1	0.495833	-1	0.725	-1	0.9875	-1.15	0.2	-0.5	0.4875	-1.15	0.15	-1.25	0.825	-1.25	0.975	-0.75
	-1.2	0.166667	-0.15	0	-0.15	0	-0.15	0	-0.55	1	-0.3	0.275	0.2	0	-0.65	1	-0.15	0.35	-0.1	0.05	0.3	0	-0.1	0.04	-1.2	0.39	-1.2	0.2875	-1.2	0.85	-1.2	0.65	-0.95	0.425	-0.95	0.775	-0.95	0.95	-1.1	0.2375	-0.45	0.4625	-1.1	0.175	-1.2	0.725	-1.2	0.95	-0.7
	-1.15	0.333334	-0.1	0	-0.1	0	-0.1	0	-0.5	1	-0.25	0.25	0.25	0	-0.6	1	-0.1	0.325	-0.05	0.0125	0.35	0	-0.05	0.025	-1.15	0.36	-1.15	0.3	-1.15	0.8125	-1.15	0.475	-0.9	0.3875	-0.9	0.8625	-0.9	0.85	-1.05	0.175	-0.4	0.35	-1.05	0.1875	-1.15	0.675	-1.15	0.8	-0.65
	-1.1	0.5	-0.05	0	-0.05	0	-0.05	0	-0.45	1.0125	-0.2	0.23125	0.3	3.27826e-08	-0.55	1	-0.05	0.275	0	0	0.4	3.72529e-09	0	0.02	-1.1	0.43	-1.1	0.3125	-1.1	0.8	-1.1	0.45	-0.85	0.316667	-0.85	0.7875	-0.85	0.6875	-1	0.1375	-0.35	0.225	-1	0.175	-1.1	0.65	-1.1	0.425	-0.6
	-1.05	0.666667	0	0	0	0	0	0	-0.4	1.0125	-0.15	0.36875	0.35	0.0250001	-0.5	1	0	0.2	0.05	0	0.45	0.00625001	0.05	0.025	-1.05	0.525	-1.05	0.35	-1.05	0.7875	-1.05	0.5	-0.8	0.245833	-0.8	0.7	-0.8	0.525	-0.95	0.225	-0.3	0.1375	-0.95	0.15	-1.05	0.625	-1.05	0.225	-0.55
	-1	0.833334	0.05	0	0.05	0	0.05	0	-0.35	0.975	-0.1	0.4375	0.4	0.075	-0.45	1	0.05	0.275	0.1	8.9407e-09	0.5	0.025	0.1	0.04	-1	0.515	-1	0.3625	-1	0.75	-1	0.475	-0.75	0.341667	-0.75	0.725	-0.75	0.525	-0.9	0.35	-0.25	0.075	-0.9	0.125	-1	0.5875	-1	0.325	-0.5
	-0.95	1.04167	0.1	0	0.1	0	0.1	0	-0.3	0.875	-0.05	0.3	0.45	0.1	-0.4	0.8	0.1	0.425	0.15	0.0125	0.55	0.0375	0.15	0.05625	-0.95	0.465	-0.95	0.3	-0.95	0.75	-0.95	0.525	-0.7	0.483333	-0.7	0.7625	-0.7	0.475	-0.85	0.325	-0.2	0.05	-0.85	0.1125	-0.95	0.525	-0.95	0.425	-0.45
	-0.9	1.33333	0.15	0	0.15	0	0.15	0	-0.25	0.8	0	0.225	0.5	0.125	-0.35	0.55	0.15	0.6	0.2	0.05	0.6	0.025	0.2	0.065	-0.9	0.415	-0.9	0.225	-0.9	0.85	-0.9	0.6	-0.65	0.391667	-0.65	0.65	-0.65	0.3875	-0.8	0.2	-0.15	0.05	-0.8	0.125	-0.9	0.45	-0.9	0.5	-0.4
	-0.85	1.625	0.2	0	0.2	0	0.2	0	-0.2	0.7625	0.05	0.2875	0.55	0.15	-0.3	0.55	0.2	0.8	0.25	0.09375	0.65	0.00625	0.25	0.0675	-0.85	0.345	-0.85	0.2	-0.85	0.9375	-0.85	0.575	-0.6	0.170833	-0.6	0.35	-0.6	0.45	-0.75	0.125	-0.1	0.0375	-0.75	0.15	-0.85	0.375	-0.85	0.5	-0.35
	-0.8	1.83333	0.25	0	0.25	0	0.25	0	-0.15	0.6	0.1	0.36875	0.6	0.125	-0.25	0.4	0.25	0.925	0.3	0.125	0.7	0	0.3	0.065	-0.8	0.3	-0.8	0.2125	-0.8	0.9	-0.8	0.55	-0.55	0.0916667	-0.55	0.1875	-0.55	0.4375	-0.7	0.0750001	-0.05	0.0125	-0.7	0.175	-0.8	0.3125	-0.8	0.35	-0.3
	-0.75	1.91667	0.3	0	0.3	0	0.3	0	-0.1	0.425	0.15	0.45	0.65	0.075	-0.2	0.15	0.3	0.95	0.35	0.13125	0.75	0	0.35	0.0625	-0.75	0.28	-0.75	0.25	-0.75	0.85	-0.75	0.424999	-0.5	0.125	-0.5	0.1875	-0.5	0.3375	-0.65	0.125	0	0	-0.65	0.1875	-0.75	0.275	-0.75	0.325	-0.25
	-0.7	1.83333	0.35	0	0.35	2.68221e-08	0.35	0	-0.05	0.3625	0.2	0.59375	0.7	0.0500002	-0.15	0.15	0.35	0.95	0.4	0.1	0.8	6.70551e-09	0.4	0.065	-0.7	0.285	-0.7	0.275	-0.7	0.9	-0.7	0.175	-0.45	0.125	-0.45	0.15	-0.45	0.2625	-0.6	0.3	0.05	0	-0.6	0.175	-0.7	0.25	-0.7	0.475	-0.2
	-0.65	1.66667	0.4	0	0.4	0.025	0.4	0	0	0.35	0.25	0.7375	0.75	0.15	-0.1	0.2	0.4	0.95	0.45	0.0625	0.85	0.00625001	0.45	0.07125	-0.65	0.31	-0.65	0.25	-0.65	0.95	-0.65	0.0750002	-0.4	0.0875	-0.4	0.125	-0.4	0.2	-0.55	0.35	0.1	0	-0.55	0.15	-0.65	0.225	-0.65	0.55	-0.15
	-0.6	1.5	0.45	0	0.45	0.05	0.45	0	0.05	0.35			0.8	0.3	-0.05	0.15			0.5	0.05	0.9	0.025	0.5	0.08	-0.6	0.28	-0.6	0.2375	-0.6	0.9	-0.6	0.15	-0.35	0.0708333	-0.35	0.1125	-0.35	0.1375	-0.5	0.2125	0.15	0	-0.5	0.125	-0.6	0.19375	-0.6	0.525	-0.1
	-0.55	1.375	0.5	0	0.5	0.025	0.5	0	0.1	0.375			0.85	0.3	0	0.1			0.55	0.06875	0.95	0.0375	0.55	0.0875	-0.55	0.185	-0.55	0.3	-0.55	0.85	-0.55	0.2	-0.3	0.129167	-0.3	0.1	-0.3	0.0875	-0.45	0.1	0.2	0	-0.45	0.125	-0.55	0.15	-0.55	0.475	-0.05
	-0.5	1.33333	0.55	0	0.55	0	0.55	0	0.15	0.4375			0.9	0.3	0.05	0.15			0.6	0.125	1	0.025	0.6	0.09	-0.5	0.115	-0.5	0.325	-0.5	0.9	-0.5	0.175	-0.25	0.175	-0.25	0.0875	-0.25	0.0875	-0.4	0.075	0.25	0	-0.4	0.175	-0.5	0.1	-0.5	0.4	0
	-0.45	1.25	0.6	0	0.6	0	0.6	0	0.2	0.5125			0.95	0.375	0.1	0.15			0.65	0.1625	1.05	0.00625	0.65	0.085	-0.45	0.105	-0.45	0.2	-0.45	0.975	-0.45	0.125	-0.2	0.0916666	-0.2	0.05	-0.2	0.075	-0.35	0.0625	0.3	0	-0.35	0.25	-0.45	0.05	-0.45	0.3	0.05
	-0.4	0.999999	0.65	0	0.65	0	0.65	0	0.25	0.55			1	0.375	0.15	0.1			0.7	0.125	1.1	0	0.7	0.07	-0.4	0.1	-0.4	0.0750001	-0.4	1	-0.4	0.0749999	-0.15	0.0208333	-0.15	0.025	-0.15	0.0375	-0.3	0.0375	0.35	0	-0.3	0.325	-0.4	0.0250001	-0.4	0.35	0.1
	-0.35	0.75	0.7	0	0.7	0	0.7	0	0.3	0.6125			1.05	0.45	0.2	0.25			0.75	0.075	1.15	0	0.75	0.0625	-0.35	0.0699999	-0.35	0.1	-0.35	0.975	-0.35	0.05	-0.1	0.025	-0.1	0.0375	-0.1	0.025	-0.25	0.0375	0.4	0	-0.25	0.35625	-0.35	0.0500001	-0.35	0.4	0.15
	-0.3	0.666667	0.75	0	0.75	0	0.75	0	0.35	0.75			1.1	0.675	0.25	0.55			0.8	0.075	1.2	0	0.8	0.08	-0.3	0.03	-0.3	0.1625	-0.3	0.9	-0.3	0.0499999	-0.05	0.0125	-0.05	0.0375	-0.05	0.0125	-0.2	0.05	0.45	0	-0.2	0.3	-0.3	0.1	-0.3	0.2	0.2
	-0.25	0.625	0.8	0	0.8	0	0.8	0	0.4	0.825			1.15	0.8	0.3	0.7			0.85	0.0875	1.25	0	0.85	0.1025	-0.25	0.01	-0.25	0.15	-0.25	0.8375	-0.25	0.025	0	1.25729e-08	0	0.0125	0	0	-0.15	0.0375	0.5	0	-0.15	0.2	-0.25	0.15	-0.25	0.0500003	0.25
	-0.2	0.5	0.85	0	0.85	0	0.85	0	0.45	0.85					0.35	0.75			0.9	0.075	1.3	2.08616e-08	0.9	0.11	-0.2	0.01	-0.2	0.125	-0.2	0.85	-0.2	0.0250003	0.05	0.00416668	0.05	0.025	0.05	0	-0.1	0.025	0.55	0	-0.1	0.0999999	-0.2	0.175	-0.2	0.175	0.3
	-0.15	0.333334	0.9	0	0.9	0	0.9	0	0.5	0.9125					0.4	0.9			0.95	0.0625	1.35	0.0125001	0.95	0.10875	-0.15	0.015	-0.15	0.15	-0.15	0.875	-0.15	0.125	0.1	0.0208333	0.1	0.05	0.1	2.16066e-08	-0.05	0.025	0.6	0	-0.05	0.025	-0.15	0.15	-0.15	0.4	0.35
	-0.1	0.166667	0.95	0	0.95	0	0.95	0	0.55	0.95					0.45	0.95			1	0.075	1.4	0.0500001	1	0.105	-0.1	0.02	-0.1	0.1875	-0.1	0.85	-0.1	0.175	0.15	0.0291667	0.15	0.05	0.15	0.0125	0	0.0125	0.65	0	0	0	-0.1	0.0999999	-0.1	0.399999	0.4
	-0.05	0.0416667	1	0	1	0.025	1	0	0.6	0.975					0.5	0.9			1.05	0.09375	1.45	0.0937501	1.05	0.0975	-0.05	0.00999998	-0.05	0.2	-0.05	0.8125	-0.05	0.0749997	0.2	0.0208334	0.2	0.05	0.2	0.025	0.05	0.0125	0.7	0	0.05	0	-0.05	0.0499999	-0.05	0.175	0.45
	0	0	1.05	0	1.05	0.0499999	1.05	0	0.65	1.025					0.55	0.95			1.1	0.1	1.5	0.125	1.1	0.085	0	0	0	0.2125	0	0.8	0	0	0.25	0.0208334	0.25	0.05	0.25	0.0125	0.1	0.0375	0.75	0	0.1	0	0	0.01875	0	0.0500003	0.5
	0.05	0	1.1	0	1.1	0.025	1.1	0	0.7	1.0375					0.6	1			1.15	0.1			1.15	0.07125	0.05	0	0.05	0.25	0.05	0.8	0.05	0	0.3	0.0541667	0.3	0.0625	0.3	0.0125	0.15	0.05	0.8	0	0.15	0	0.05	0.0250001	0.05	0.150001	0.55
	0.1	0	1.15	0	1.15	0	1.15	0	0.75	1.025					0.65	1			1.2	0.1			1.2	0.06	0.1	2.26498e-08	0.1	0.275	0.1	0.8	0.1	0	0.35	0.0791666	0.35	0.0875	0.35	0.025	0.2	0.0375	0.85	0	0.2	0	0.1	0.0500001	0.1	0.425	0.6
	0.15	0	1.2	0	1.2	5.21541e-08	1.2	0	0.8	1.0375					0.7	1			1.25	0.09375			1.25	0.06	0.15	0.0100001	0.15	0.25	0.15	0.8125	0.15	9.38773e-08	0.4	0.0708333	0.4	0.1125	0.4	0.025	0.25	0.025	0.9	0	0.25	0	0.15	0.0750001	0.15	0.575	0.65
	0.2	0	1.25	5.36442e-08	1.25	0.0250001	1.25	0	0.85	1.05					0.75	1			1.3	0.075			1.3	0.08			0.2	0.225	0.2	0.85	0.2	0.0250003	0.45	0.141667	0.45	0.125	0.45	0.0375	0.3	0.0375001	0.95	0	0.3	0	0.2	0.11875	0.2	0.425	0.7
	0.25	0	1.3	0.0250001	1.3	0.0750001	1.3	0	0.9	1.0625					0.8	1			1.35	0.05625			1.35	0.09875			0.25	0.25	0.25	0.875	0.25	0.1	0.5	0.25	0.5	0.1125	0.5	0.0500001	0.35	0.0625	1	0	0.35	0	0.25	0.2	0.25	0.375001	0.75
	0.3	1.73847e-07	1.35	0.05	1.35	0.0999999	1.35	0	0.95	1.075					0.85	1			1.4	0.05			1.4	0.095			0.3	0.2875	0.3	0.85	0.3	0.125	0.55	0.245834	0.55	0.0875002	0.55	0.0875001	0.4	0.0624999	1.05	0	0.4	0	0.3	0.3	0.3	0.625001	0.8
	0.35	0.0416672	1.4	0.05	1.4	0.0749999	1.4	0	1	1.075					0.9	1			1.45	0.05			1.45	0.09			0.35	0.3	0.35	0.8125	0.35	0.175	0.6	0.216667	0.6	0.175	0.6	0.1375	0.45	0.025	1.1	0	0.45	0	0.35	0.4	0.35	0.875	0.85
	0.4	0.166667	1.45	0.05	1.45	0.0249999	1.45	0																			0.4	0.325	0.4	0.8	0.4	0.275	0.65	0.283334	0.65	0.3625	0.65	0.1125	0.5	0.0250001	1.15	2.98023e-08	0.5	0	0.4	0.5			0.9
	0.45	0.333334	1.5	0.05	1.5	1.2219e-07	1.5	0																			0.45	0.4	0.45	0.8125	0.45	0.2	0.7	0.308333	0.7	0.4	0.7	0.15	0.55	0.0500001	1.2	0.0125	0.55	0	0.45	0.6			0.95
	0.5	0.5																									0.5	0.4625	0.5	0.85	0.5	0.100001	0.75	0.229167	0.75	0.4	0.75	0.275	0.6	0.0875003	1.25	0.025	0.6	0	0.5	0.7			1
	0.55	0.541666																									0.55	0.45	0.55	0.8875	0.55	0.225001	0.8	0.2375	0.8	0.5625	0.8	0.3	0.65	0.2	1.3	0.0125	0.65	0	0.55	0.8			1.05
	0.6	0.333332																									0.6	0.3875	0.6	0.9	0.6	0.475	0.85	0.304167	0.85	0.7375	0.85	0.3125	0.7	0.2375	1.35	3.27826e-08	0.7	3.27826e-08	0.6	0.8875			1.1
	0.65	0.125																									0.65	0.3	0.65	0.9125	0.65	0.499999	0.9	0.270834	0.9	0.7375	0.9	0.425	0.75	0.1375	1.4	0.0125001	0.75	0.0125001	0.65	0.95			1.15
	0.7	0.166668																									0.7	0.2375	0.7	0.95	0.7	0.325	0.95	0.2	0.95	0.575	0.95	0.5	0.8	0.0499999	1.45	0.0500001	0.8	0.0500001	0.7	1			1.2
	0.75	0.375001																									0.75	0.25	0.75	0.9625	0.75	0.325	1	0.170833	1	0.5875	1	0.4875	0.85	0.0250001	1.5	0.075	0.85	0.1	0.75	1.05			1.25
	0.8	0.666668																									0.8	0.2875	0.8	0.9	0.8	0.35	1.05	0.129167	1.05	0.725	1.05	0.55	0.9	0.0500001			0.9	0.15	0.8	1.1125			1.3
	0.85	0.875																									0.85	0.3	0.85	0.85	0.85	0.3	1.1	0.120834	1.1	0.7625	1.1	0.6	0.95	0.0875001			0.95	0.18125	0.85	1.2			1.35
	0.9	0.833333																									0.9	0.3125	0.9	0.9	0.9	0.400001	1.15	0.258334	1.15	0.825	1.15	0.525	1	0.1375			1	0.175	0.9	1.3			1.4
	0.95	0.791668																									0.95	0.35	0.95	0.9625	0.95	0.575001	1.2	0.379167	1.2	0.8875	1.2	0.55	1.05	0.175			1.05	0.15	0.95	1.4			1.45
	1	1																									1	0.4125	1	0.95	1	0.725	1.25	0.366667	1.25	0.8875	1.25	0.65	1.1	0.125			1.1	0.125	1	1.4875			1.5
	1.05	1.16667																									1.05	0.5	1.05	0.925	1.05	0.7	1.3	0.325	1.3	0.875	1.3	0.7125	1.15	0.125			1.15	0.0999999	1.05	1.55
	1.1	0.999999																									1.1	0.5875	1.1	0.95	1.1	0.6	1.35	0.2625	1.35	0.925	1.35	0.85	1.2	0.1875			1.2	0.0749999	1.1	1.6
	1.15	0.833334																									1.15	0.65	1.15	0.9625	1.15	0.6	1.4	0.191667	1.4	0.95	1.4	0.9375	1.25	0.1375			1.25	0.0499999	1.15	1.65
	1.2	1																									1.2	0.624999	1.2	0.9	1.2	0.55	1.45	0.208333	1.45	0.9125	1.45	0.9125	1.3	0.0875002			1.3	0.0249999	1.2	1.6625
	1.25	1.25																									1.25	0.449999	1.25	0.85	1.25	0.525	1.5	0.304167	1.5	0.875	1.5	0.8875	1.35	0.1375			1.35	0.00624998	1.25	1.6
	1.3	1.33333																									1.3	0.3	1.3	0.9	1.3	0.550001							1.4	0.2125			1.4	0	1.3	1.5
	1.35	1.29167																									1.35	0.35	1.35	0.9625	1.35	0.650001							1.45	0.2375			1.45	0
	1.4	1.16667																									1.4	0.45	1.4	0.95	1.4	0.8											1.5	8.9407e-08
	1.45	0.999999																									1.45	0.45	1.45	0.925	1.45	0.8
	1.5	0.833333																									1.5	0.462501	1.5	0.95	1.5	0.725
[truncated: 27 more columns]

## Sheet: panel I
Dataset no:	1		2		3		4		5		6		7		8		9		10		11		12		13		14		15		16		17		18		19		20		21		22		23		24		25
Cell no:	1		1		1		2		3		3		3		4		4		5		5		6		6		7		7		7		8		8		9		9		10		10		11		11		11
	ITD re. trough (ms)	Spikes/click	ITD re. trough (ms)	Spikes/click	ITD re. trough (ms)	Spikes/click	ITD re. trough (ms)	Spikes/click	ITD re. trough (ms)	Spikes/click	ITD re. trough (ms)	Spikes/click	ITD re. trough (ms)	Spikes/click	ITD re. trough (ms)		ITD re. trough (ms)	Spikes/click	ITD re. trough (ms)	Spikes/click	ITD re. trough (ms)	Spikes/click	ITD re. trough (ms)	Spikes/click	ITD re. trough (ms)	Spikes/click	ITD re. trough (ms)	Spikes/click	ITD re. trough (ms)	Spikes/click	ITD re. trough (ms)		ITD re. trough (ms)	Spikes/click	ITD re. trough (ms)	Spikes/click	ITD re. trough (ms)	Spikes/click	ITD re. trough (ms)	Spikes/click	ITD re. trough (ms)	Spikes/click	ITD re. trough (ms)	Spikes/click	ITD re. trough (ms)	Spikes/click	ITD re. trough (ms)	Spikes/click	ITD re. trough (ms)
	-1.5		-1.5		-1.5	0.25	-0.9	0.175	-1.5	0.4375	-1.25	0.7125	-1.2		-1.2	0.275	-1.5	0.0500001	-0.5	1	-1.1	0.975	-1.5	1.4	-0.75	1	-1.5	0.075	-1.5		-1.5		-1.5	0.4	-1.5	0.38125	-1.5		-0.65		-1.3	0.325	-1.5	0.45	-1.5	0.0999999	-0.6	0.05625	-1.5
	-1.45		-1.45		-1.45	0.333333	-0.85	0.0999999	-1.45	0.5	-1.2	0.75	-1.15		-1.15	0.2	-1.45	0.0749999	-0.45	1	-1.05	0.9	-1.45	1.3	-0.7	1	-1.45	0.15	-1.45		-1.45		-1.45	0.45	-1.45	0.4	-1.45		-0.6		-1.25	0.4	-1.45	0.525	-1.45	0.0500001	-0.55	0.075	-1.45
	-1.4		-1.4	0	-1.4	0.25	-0.8	0.025	-1.4	0.55	-1.15	0.75	-1.1		-1.1	0.1375	-1.4	0.0499999	-0.4	1	-1	0.85	-1.4	1.225	-0.65	1	-1.4	0.15	-1.4		-1.4		-1.4	0.54375	-1.4	0.38125	-1.4		-0.55		-1.2	0.5125	-1.4	0.45	-1.4	0.1	-0.5	0.1	-1.4
	-1.35		-1.35	0	-1.35	0.333333	-0.75	5.0664e-08	-1.35	0.5	-1.1	0.65	-1.05		-1.05	0.15	-1.35	0.0125	-0.35	1	-0.95	0.9	-1.35	1.2	-0.6	1	-1.35	0.05	-1.35		-1.35		-1.35	0.625	-1.35	0.325	-1.35		-0.5		-1.15	0.65	-1.35	0.3875	-1.35	0.175	-0.45	0.125	-1.35
	-1.3		-1.3	1.98682e-08	-1.3	0.416667	-0.7	0.0250002	-1.3	0.4125	-1.05	0.5625	-1		-1	0.1875	-1.3	0	-0.3	1	-0.9	0.975	-1.3	1.175	-0.55	1	-1.3	0.025	-1.3		-1.3		-1.3	0.66875	-1.3	0.26875	-1.3		-0.45		-1.1	0.7375	-1.3	0.5	-1.3	0.2	-0.4	0.15	-1.3
	-1.25		-1.25	0.0833334	-1.25	0.166667	-0.65	0.1	-1.25	0.35	-1	0.6	-0.95		-0.95	0.2	-1.25	0	-0.25	1	-0.85	1	-1.25	1.1	-0.5	1	-1.25	0.075	-1.25		-1.25		-1.25	0.65	-1.25	0.25	-1.25		-0.4		-1.05	0.7	-1.25	0.5875	-1.25	0.175	-0.35	0.175	-1.25
	-1.2		-1.2	0.25	-1.2	0.0833334	-0.6	0.15	-1.2	0.2875	-0.95	0.675	-0.9		-0.9	0.1875	-1.2	0	-0.2	1	-0.8	1	-1.2	1.025	-0.45	1	-1.2	0.125	-1.2		-1.2		-1.2	0.63125	-1.2	0.25625	-1.2		-0.35		-1	0.5875	-1.2	0.45	-1.2	0.0999999	-0.3	0.175	-1.2
	-1.15	9.93411e-09	-1.15	0.333333	-1.15	0.25	-0.55	0.0999999	-1.15	0.2	-0.9	0.7	-0.85		-0.85	0.15	-1.15	0	-0.15	1	-0.75	1	-1.15	1	-0.4	1	-1.15	0.15	-1.15		-1.15		-1.15	0.675	-1.15	0.275	-1.15		-0.3		-0.95	0.45	-1.15	0.275	-1.15	0.025	-0.25	0.125	-1.15
	-1.1	0.0833333	-1.1	0.333333	-1.1	0.25	-0.5	0.0500001	-1.1	0.1625	-0.85	0.65	-0.8		-0.8	0.1125	-1.1	4.02331e-08	-0.1	1	-0.7	0.975	-1.1	1.075	-0.35	1	-1.1	0.1	-1.1		-1.1		-1.1	0.7375	-1.1	0.31875	-1.1		-0.25		-0.9	0.3625	-1.1	0.25	-1.1	4.47035e-08	-0.2	0.06875	-1.1
	-1.05	0.166667	-1.05	0.25	-1.05	0.166667	-0.45	0.1	-1.05	0.25	-0.8	0.5	-0.75		-0.75	0.1	-1.05	0.0125001	-0.05	1	-0.65	0.9	-1.05	1.3	-0.3	1	-1.05	0.1	-1.05		-1.05		-1.05	0.775	-1.05	0.4	-1.05		-0.2		-0.85	0.4	-1.05	0.3125	-1.05	0.0250001	-0.15	0.05	-1.05
	-1	0.166667	-1	0.0833333	-1	0.25	-0.4	0.15	-1	0.325	-0.75	0.375	-0.7		-0.7	0.1125	-1	0.0500001	0	1	-0.6	0.85	-1	1.55	-0.25	0.975	-1	0.175	-1		-1		-1	0.7375	-1	0.4625	-1	0.275	-0.15		-0.8	0.5	-1	0.4	-1	0.1	-0.1	0.0750001	-1
	-0.95	0.25	-0.95	0	-0.95	0.416667	-0.35	0.0999999	-0.95	0.25	-0.7	0.4	-0.65	0.6	-0.65	0.15	-0.95	0.0749999	0.05	1	-0.55	0.9	-0.95	1.7	-0.2	0.9	-0.95	0.15	-0.95		-0.95		-0.95	0.575	-0.95	0.45	-0.95	0.2875	-0.1	1.2125	-0.75	0.6	-0.95	0.4625	-0.95	0.175	-0.05	0.15	-0.95
	-0.9	0.25	-0.9	5.96046e-08	-0.9	0.583333	-0.3	0.0500001	-0.9	0.1375	-0.65	0.4625	-0.6	0.6	-0.6	0.2	-0.9	0.0499999	0.1	1	-0.5	0.95	-0.9	1.775	-0.15	0.85	-0.9	0.075	-0.9		-0.9		-0.9	0.41875	-0.9	0.4125	-0.9	0.3125	-0.05	1.2125	-0.7	0.675	-0.9	0.45	-0.9	0.2	0	0.20625	-0.9
	-0.85	0.0833333	-0.85	0.0833335	-0.85	0.666667	-0.25	0.1	-0.85	0.1	-0.6	0.45	-0.55	0.6	-0.55	0.25	-0.85	0.025	0.15	1	-0.45	0.9	-0.85	1.8	-0.1	0.9	-0.85	0.0500001	-0.85		-0.85		-0.85	0.4	-0.85	0.4	-0.85	0.2625	0	1.2625	-0.65	0.7	-0.85	0.4	-0.85	0.2	0.05	0.175	-0.85
	-0.8	0.0833334	-0.8	0.25	-0.8	0.666667	-0.2	0.15	-0.8	0.162501	-0.55	0.45	-0.5	0.625	-0.5	0.275	-0.8	0.05	0.2	0.975	-0.4	0.85	-0.8	1.775	-0.05	0.975	-0.8	0.1	-0.8		-0.8		-0.8	0.44375	-0.8	0.45	-0.8	0.225	0.05	1.225	-0.6	0.6875	-0.8	0.35	-0.8	0.2	0.1	0.11875	-0.8
	-0.75	0.25	-0.75	0.333333	-0.75	0.666667	-0.15	0.0999999	-0.75	0.35	-0.5	0.55	-0.45	0.625	-0.45	0.25	-0.75	0.0749999	0.25	0.9	-0.35	0.9	-0.75	1.7	0	1	-0.75	0.15	-0.75		-0.75		-0.75	0.475	-0.75	0.6	-0.75	0.275	0.1	1.1625	-0.55	0.65	-0.75	0.3125	-0.75	0.225	0.15	0.1	-0.75
	-0.7	0.416667	-0.7	0.416667	-0.7	0.583333	-0.1	0.0750003	-0.7	0.525	-0.45	0.6625	-0.4	0.8	-0.4	0.225	-0.7	0.05	0.3	0.825	-0.3	0.975	-0.7	1.625	0.05	1	-0.7	0.125	-0.7		-0.7		-0.7	0.49375	-0.7	0.725	-0.7	0.3	0.15	1.15	-0.5	0.6	-0.7	0.3	-0.7	0.3	0.2	0.09375	-0.7
	-0.65	0.5	-0.65	0.416667	-0.65	0.5	-0.05	0.2	-0.65	0.55	-0.4	0.7	-0.35	0.925	-0.35	0.25	-0.65	0.0250001	0.35	0.8	-0.25	1	-0.65	1.6	0.1	1	-0.65	0.1	-0.65		-0.65		-0.65	0.5	-0.65	0.7	-0.65	0.3375	0.2	1.125	-0.45	0.55	-0.65	0.2875	-0.65	0.325	0.25	0.075	-0.65
	-0.6	0.416667	-0.6	0.416667	-0.6	0.5	0	0.3	-0.6	0.55	-0.35	0.7375	-0.3	0.975	-0.3	0.3	-0.6	0.0500001	0.4	0.825	-0.2	1	-0.6	1.575	0.15	1	-0.6	0.1	-0.6	0.2125	-0.6		-0.6	0.53125	-0.6	0.65	-0.6	0.45	0.25	1.0625	-0.4	0.5125	-0.6	0.25	-0.6	0.2	0.3	0.0625	-0.6
	-0.55	0.333333	-0.55	0.583333	-0.55	0.5	0.05	0.2	-0.55	0.65	-0.3	0.85	-0.25	1.125	-0.25	0.35	-0.55	0.0749999	0.45	0.9	-0.15	1	-0.55	1.5	0.2	1	-0.55	0.125	-0.55	0.25	-0.55		-0.55	0.625	-0.55	0.7	-0.55	0.5	0.3	1.05	-0.35	0.5	-0.55	0.25	-0.55	0.0750002	0.35	0.075	-0.55
	-0.5	0.416667	-0.5	0.583333	-0.5	0.666667	0.1	0.0499999	-0.5	0.7875	-0.25	0.95	-0.2	1.225	-0.2	0.4	-0.5	0.0499999	0.5	0.95	-0.1	1.025	-0.5	1.45	0.25	1	-0.5	0.15	-0.5	0.25	-0.5	0.2125	-0.5	0.725	-0.5	0.78125	-0.5	0.525	0.35	1.15	-0.3	0.525	-0.5	0.35	-0.5	0.1	0.4	0.1	-0.5
	-0.45	0.416667	-0.45	0.5	-0.45	0.833333	0.15	0	-0.45	0.9	-0.2	0.95	-0.15	1.4	-0.15	0.45	-0.45	0.0250001	0.55	0.9	-0.05	1.1	-0.45	1.5	0.3	1	-0.45	0.125	-0.45	0.2	-0.45	0.1625	-0.45	0.775	-0.45	0.825	-0.45	0.575	0.4	1.175	-0.25	0.6	-0.45	0.5	-0.45	0.15	0.45	0.125	-0.45
	-0.4	0.25	-0.4	0.583334	-0.4	0.75	0.2	0	-0.4	0.975	-0.15	0.925	-0.1	1.675	-0.1	0.525	-0.4	0.0500001	0.6	0.85	0	1.15	-0.4	1.525	0.35	1	-0.4	0.0749999	-0.4	0.1625	-0.4	0.15	-0.4	0.825	-0.4	0.85625	-0.4	0.575	0.45	1.125	-0.2	0.6875	-0.4	0.65	-0.4	0.0999999	0.5	0.13125	-0.4
	-0.35	0.416667	-0.35	0.75	-0.35	0.666667	0.25	0	-0.35	1	-0.1	0.95	-0.05	1.875	-0.05	0.65	-0.35	0.0749999	0.65	0.9	0.05	1.1	-0.35	1.4	0.4	1	-0.35	0.025	-0.35	0.225	-0.35	0.225	-0.35	0.925	-0.35	0.9	-0.35	0.525	0.5	1.125	-0.15	0.75	-0.35	0.775	-0.35	0.0500001	0.55	0.0999999	-0.35
	-0.3	0.75	-0.3	0.75	-0.3	0.666667	0.3	0	-0.3	1	-0.05	0.9875	0	1.975	0	0.725	-0.3	0.0499998	0.7	0.975	0.1	1.025	-0.3	1.275	0.45	1	-0.3	0.0500001	-0.3	0.2875	-0.3	0.3375	-0.3	1.0125	-0.3	0.94375	-0.3	0.5875	0.55	1.025	-0.1	0.8	-0.3	0.85	-0.3	0.1	0.6	0.0625	-0.3
	-0.25	0.666666	-0.25	0.75	-0.25	0.75	0.35	0	-0.25	1	0	1	0.05	1.975	0.05	0.65	-0.25	0.0124999	0.75	1	0.15	1	-0.25	1.3	0.5	1	-0.25	0.0999999	-0.25	0.275	-0.25	0.3875	-0.25	1.025	-0.25	0.975	-0.25	0.725	0.6	0.9625	-0.05	0.85	-0.25	0.875	-0.25	0.15	0.65	0.05	-0.25
	-0.2	0.583333	-0.2	0.833333	-0.2	0.833333	0.4	0	-0.2	1	0.05	1	0.1	1.925	0.1	0.525	-0.2	5.36442e-08	0.8	1	0.2	1	-0.2	1.35	0.55	1	-0.2	0.0499999	-0.2	0.2625	-0.2	0.3125	-0.2	1.00625	-0.2	0.96875	-0.2	0.8375	0.65	1.025	0	0.8625	-0.2	0.85	-0.2	0.0999999	0.7	0.0625001	-0.2
	-0.15	0.75	-0.15	0.833333	-0.15	0.75	0.45	0	-0.15	1	0.1	1	0.15	1.9	0.15	0.45	-0.15	0.0125002	0.85	1	0.25	1	-0.15	1.3	0.6	1	-0.15	4.76837e-08	-0.15	0.2625	-0.15	0.2375	-0.15	1	-0.15	0.9	-0.15	0.9125	0.7	1.0875	0.05	0.8	-0.15	0.825	-0.15	0.0750004	0.75	0.1	-0.15
	-0.1	0.833333	-0.1	0.833333	-0.1	0.666667	0.5	0	-0.1	1.025	0.15	1	0.2	1.9	0.2	0.4375	-0.1	0.0500002	0.9	0.975	0.3	1	-0.1	1.325	0.65	1	-0.1	0.0250001	-0.1	0.2375	-0.1	0.2625	-0.1	1.0125	-0.1	0.8625	-0.1	0.9	0.75	1.175	0.1	0.7375	-0.1	0.85	-0.1	0.2	0.8	0.14375	-0.1
	-0.05	0.916667	-0.05	0.833333	-0.05	0.75	0.55	0	-0.05	1.1	0.2	1	0.25	1.925	0.25	0.5	-0.05	0.0875001	0.95	0.9	0.35	1	-0.05	1.6	0.7	1	-0.05	0.1	-0.05	0.275	-0.05	0.3875	-0.05	1.05	-0.05	0.95	-0.05	0.9375	0.8	1.2	0.15	0.75	-0.05	0.8875	-0.05	0.35	0.85	0.175	-0.05
	0	1	0	0.916667	0	0.916666	0.6	0.025	0	1.1625	0.25	1	0.3	1.95	0.3	0.5875	0	0.1	1	0.825	0.4	0.95	0	1.825	0.75	1	0	0.175	0	0.3125	0	0.45	0	1.06875	0	1.025	0	1	0.85	1.15	0.2	0.775	0	0.9	0	0.4	0.9	0.1875	0
	0.05	1	0.05	0.916667	0.05	0.833333	0.65	0.0999999	0.05	1.15	0.3	1	0.35	1.925	0.35	0.65	0.05	0.1	1.05	0.8	0.45	0.8	0.05	1.7	0.8	1	0.05	0.175	0.05	0.225	0.05	0.35	0.05	1.025	0.05	0.95	0.05	0.975	0.9	1.1375	0.25	0.75	0.05	0.8625	0.05	0.4	0.95	0.175	0.05
	0.1	0.916666	0.1	0.833333	0.1	0.583334	0.7	0.15	0.1	1.1	0.35	1	0.4	1.875	0.4	0.6625	0.1	0.0999999	1.1	0.825	0.5	0.675	0.1	1.5	0.85	1	0.1	0.0999998	0.1	0.1375	0.1	0.2875	0.1	0.96875	0.1	0.825	0.1	0.9375	0.95	1.1875	0.3	0.7125	0.1	0.75	0.1	0.4	1	0.16875	0.1
	0.15	0.75	0.15	0.833333	0.15	0.666667	0.75	0.0999997	0.15	1.05	0.4	1	0.45	1.825	0.45	0.6	0.15	0.0874998	1.15	0.9	0.55	0.7	0.15	1.5	0.9	1	0.15	0.0249999	0.15	0.1375	0.15	0.3375	0.15	0.95	0.15	0.75	0.15	0.925	1	1.25	0.35	0.7	0.15	0.6125	0.15	0.4	1.05	0.2	0.15
	0.2	0.666667	0.2	0.666666	0.2	0.749999	0.8	0.0249999	0.2	1.0375	0.45	1	0.5	1.825	0.5	0.55	0.2	0.0499998	1.2	0.95	0.6	0.775	0.2	1.625	0.95	1	0.2	0	0.2	0.1375	0.2	0.3625	0.2	0.93125	0.2	0.6875	0.2	0.95	1.05	1.25	0.4	0.65	0.2	0.5	0.2	0.4	1.1	0.20625	0.2
	0.25	0.583333	0.25	0.416667	0.25		0.85	0	0.25	1.1	0.5	1	0.55	1.85	0.55	0.6	0.25	0.0124999	1.25	0.9	0.65	0.8	0.25	1.8	1	1	0.25		0.25	0.1	0.25	0.35	0.25	0.875	0.25	0.6	0.25	0.925	1.1	1.1875	0.45	0.5	0.25	0.4625	0.25	0.375	1.15	0.125	0.25
	0.3	0.583334	0.3	0.416667	0.3		0.9	0	0.3	1.1125	0.55	0.9875	0.6	1.75	0.6	0.625	0.3	0	1.3	0.85	0.7	0.825	0.3	1.85	1.05	1	0.3		0.3		0.3	0.2875	0.3	0.81875	0.3	0.55625	0.3	0.8625	1.15	1.1375	0.5	0.3375	0.3	0.55	0.3	0.3	1.2	0.0312499	0.3
	0.35	0.75	0.35	0.583333	0.35		0.95	0	0.35	0.949999	0.6	0.95	0.65	1.6	0.65	0.5	0.35	0	1.35	0.9	0.75	0.9	0.35	1.6	1.1	1	0.35		0.35		0.35	0.1625	0.35	0.8	0.35	0.625	0.35	0.8375	1.2	1.15	0.55	0.25	0.35	0.6375	0.35	0.25	1.25	1.78814e-08	0.35
	0.4	0.75	0.4	0.583333	0.4		1	0	0.4	0.75	0.65	0.925	0.7	1.525	0.7	0.375	0.4	6.25849e-08	1.4	0.975	0.8	0.975	0.4	1.325	1.15	1	0.4		0.4		0.4		0.4	0.79375	0.4	0.7125	0.4	0.825	1.25	1.1875	0.6	0.2375	0.4	0.6	0.4	0.3	1.3	0.00625005	0.4
	0.45	0.666667	0.45	0.5	0.45		1.05	0	0.45	0.65	0.7	0.95	0.75	1.4	0.75	0.4	0.45	0.0125002	1.45	1	0.85	1	0.45	1.3	1.2	1	0.45		0.45		0.45		0.45	0.775	0.45	0.725	0.45	0.75	1.3	1.1625	0.65	0.3	0.45	0.525	0.45	0.35	1.35	0.0250001	0.45
	0.5	0.666667	0.5		0.5		1.1	0	0.5	0.6	0.75	0.9875	0.8	1.275	0.8	0.4875	0.5	0.0500001	1.5	1	0.9	0.95	0.5	1.425	1.25	1	0.5		0.5		0.5		0.5	0.75625	0.5	0.6875	0.5	0.5875	1.35	1.1	0.7	0.3625	0.5	0.5	0.5	0.3	1.4	0.0500001	0.5
	0.55	0.666667	0.55		0.55		1.15	0	0.55	0.55	0.8	1	0.85	1.175	0.85	0.55	0.55	0.0749999			0.95	0.8	0.55	1.6	1.3	1	0.55		0.55		0.55		0.55	0.75	0.55	0.625	0.55	0.5375	1.4	1.075	0.75	0.35	0.55	0.5125	0.55	0.2	1.45	0.0750001	0.55
	0.6	0.666667	0.6		0.6		1.2	0	0.6	0.4875	0.85	0.9875	0.9	1.05	0.9	0.575	0.6	0.0499998			1	0.65	0.6	1.725	1.35	1	0.6		0.6		0.6		0.6	0.7625	0.6	0.575	0.6	0.55	1.45	1.05	0.8	0.3125	0.6	0.55	0.6	0.0999999	1.5	0.1	0.6
	0.65	0.666667	0.65		0.65		1.25	0	0.65	0.4	0.9	0.95	0.95	0.975	0.95	0.55	0.65	0.0124999			1.05	0.6	0.65		1.4	1	0.65		0.65		0.65		0.65	0.8	0.65	0.575	0.65	0.4625	1.5	0.9125	0.85	0.3	0.65	0.5625	0.65	0.0750005			0.65
	0.7	0.75	0.7		0.7		1.3	0	0.7	0.35	0.95	0.862499	1	0.925	1	0.462499	0.7	6.70552e-08			1.1	0.625	0.7		1.45	1	0.7		0.7		0.7		0.7	0.825	0.7	0.58125	0.7	0.4125			0.9	0.325	0.7	0.5	0.7	0.2			0.7
	0.75		0.75		0.75		1.35	0	0.75	0.4	1	0.699999	1.05	0.85	1.05	0.299999	0.75	2.01166e-07			1.15	0.7			1.5	1	0.75		0.75		0.75		0.75	0.8	0.75	0.55	0.75	0.4375			0.95	0.4	0.75	0.4625	0.75	0.3			0.75
	0.8		0.8		0.8		1.4	0	0.8	0.4875	1.05	0.55	1.1	0.675	1.1	0.15					1.2	0.725					0.8		0.8		0.8		0.8	0.75	0.8	0.5125	0.8	0.45			1	0.4875	0.8	0.55	0.8	0.2			0.8
	0.85		0.85				1.45	0	0.85	0.55	1.1	0.5	1.15	0.55	1.15	0.0999999					1.25	0.599999							0.85		0.85		0.85	0.7	0.85	0.5	0.85	0.4375			1.05	0.55	0.85	0.6625	0.85	0.0750001			0.85
	0.9		0.9				1.5	0	0.9	0.55	1.15	0.5125	1.2	0.675	1.2	0.0874998					1.3	0.399999							0.9		0.9		0.9	0.675	0.9	0.5	0.9				1.1	0.55	0.9	0.7	0.9	0.1			0.9
	0.95		0.95						0.95	0.45	1.2	0.55	1.25		1.25	0.0499998					1.35	0.2							0.95		0.95		0.95	0.7	0.95	0.5	0.95				1.15	0.45	0.95	0.7125	0.95	0.175			0.95
	1		1						1	0.375	1.25	0.6	1.3		1.3	0.0124999					1.4	0.0750001							1		1		1	0.71875	1	0.50625	1				1.2	0.375	1	0.75					1
	1.05		1.05						1.05	0.45	1.3	0.65	1.35		1.35	1.2219e-07					1.45	0.1							1.05		1.05		1.05	0.675	1.05	0.525	1.05				1.25	0.45	1.05	0.724999					1.05
	1.1								1.1	0.5375	1.35	0.65	1.4		1.4	0.0250004					1.5	0.2							1.1		1.1		1.1	0.64375	1.1	0.53125	1.1				1.3	0.5375	1.1	0.549999					1.1
	1.15								1.15	0.5	1.4	0.55	1.45		1.45	0.1													1.15		1.15		1.15	0.7	1.15	0.5	1.15				1.35	0.5	1.15	0.375					1.15
	1.2								1.2	0.4375	1.45	0.4625	1.5		1.5	0.15													1.2		1.2		1.2	0.7625	1.2	0.48125	1.2				1.4	0.4125	1.2	0.35
	1.25								1.25	0.45	1.5	0.5																	1.25		1.25		1.25	0.75	1.25	0.525	1.25				1.45	0.35	1.25	0.462501
	1.3								1.3	0.4875																			1.3		1.3		1.3	0.71875	1.3	0.5875	1.3				1.5	0.3375	1.3	0.700001
									1.35	0.5																			1.35		1.35		1.35	0.725	1.35	0.625	1.35						1.35	0.8875
									1.4	0.5																					1.4		1.4	0.743749	1.4	0.64375	1.4						1.4	0.849999
																															1.45						1.45						1.45	0.7375
[truncated: 1 more columns]

## Sheet: panel J
	LSO - principal			LSO - non-principal			MSO
	|left slope| (sp/click/ms)	|right slope| (sp/click/ms)		|left slope| (sp/click/ms)	|right slope| (sp/click/ms)		|left slope| (sp/click/ms)	|right slope| (sp/click/ms)
	3.5459	2.7696		2.6956	0.5157		0.9302	N.D.
	6.2327	3.9562		N.D.	0.885		1.1828	N.D.
	4.8	5.3097		N.D.	0.1598		0.5612	2.5581
	N.D.	1.791		N.D.	1.6667		1.8174	N.D.
	0.9147	N.D.		N.D.	N.D.		N.D.	N.D.
	2.0762	1.5077		N.D.	N.D.		N.D.	N.D.
	2.1171	2.8913		N.D.	1.4159		0.6802	0.3839
	2.8786	4.6365		3.1579	3.2732		N.D.	0.9577
	3.3926	N.D.		2.473	4.4485		N.D.	0.6887
	N.D.	0.1926		N.D.	0.4983		N.D.	N.D.
	2.3311	N.D.		N.D.	0.5528		N.D.	N.D.
	2.2422	N.D.		N.D.	N.D.		N.D.	N.D.
	2.9207	N.D.		0.3218	N.D.		N.D.	N.D.
	N.D.	2.5		N.D.	N.D.		N.D.	N.D.
	4.2857	N.D.		0.439	0.8359		N.D.	N.D.
	2.6729	2.4143		0.8071	0.2779		N.D.	N.D.
	3.5909	3.0464		1.9949	1.1516		N.D.	N.D.
	N.D.	4.465		1.2397	0.9808
	3.3881	3.2909		1.7863	N.D.
	N.D.	N.D.		1.3605	1.1117
	3.871	1.5101		N.D.	1.0708
	1.7143	1.5658		N.D.	1.6122
	3.363	2.6167		0.5683	2.2438
	N.D.	0.8263		3.428	1.6377
				2.9679	N.D.
				5.9541	N.D.
				N.D.	N.D.
				1.7684	0.7831
				N.D.	0.8826
				N.D.	N.D.
				N.D.	N.D.
				N.D.	N.D.
				N.D.	N.D.
				1.1827	1.9775
				N.D.	1.7731
				3.2152	N.D.

[truncated: 2 more sheets: panel K, panel L]
