# Supplementary material for: Glycinergic axonal inhibition subserves acute spatial sensitivity to sudden increases in sound intensity
Source: eLife journal article supplement (doi:10.7554/elife.62183), 2021-06-14
Supplement: supp [file elife-62183-supp-v1.zip › elife_poa_e62183_Figure_2_figure_supplement_1_source_data_1.xlsx]

## Sheet: panel A
		ITD (ms)	Spikes/click
			mean	s.e.m.
		-1.1	1	0
		-1.05	1	0
		-1	1	0
		-0.95	1	0
		-0.9	1	0
		-0.85	1	0
		-0.8	1	0
		-0.75	1	0
		-0.7	1	0
		-0.65	1	0
		-0.6	1	0
		-0.55	1	0
		-0.5	1	0
		-0.45	1	0
		-0.4	0.6	0.1633
		-0.35	0.6	0.1633
		-0.3	0.2	0.1333
		-0.25	0.1	0.1
		-0.2	0.2	0.1333
		-0.15	0	0
		-0.1	0	0
		-0.05	0.1	0.1
		0	0.3	0.1528
		0.05	0.1	0.1
		0.1	0.2	0.1333
		0.15	0.2	0.1333
		0.2	0.2	0.1333
		0.25	0.7	0.1528
		0.3	0.4	0.1633
		0.35	0.5	0.1667
		0.4	0.7	0.1528
		0.45	0.3	0.1528
		0.5	0.5	0.1667
		0.55	0.9	0.1
		0.6	1	0
		0.65	1	0
		0.7	1	0
		0.75	1	0
		0.8	0.9	0.1
		0.85	1	0
		0.9	1	0
		0.95	1	0
		1	1	0
		1.05	1	0
		1.1	1	0

## Sheet: panel B
	ITD -1 ms															ITD -0.4 ms															ITD -0.2 ms															ITD -0.1 ms
	Time from ipsilateral click (ms)	Vm rel Mon ipsi (mV)	Vm rel Mon contra (mV)	Vm rel Binaural (mV)	Vm rel Binaural (mV)	Vm rel Binaural (mV)	Vm rel Binaural (mV)	Vm rel Binaural (mV)	Vm rel Binaural (mV)	Vm rel Binaural (mV)	Vm rel Binaural (mV)	Vm rel Binaural (mV)	Vm rel Binaural (mV)			Time from ipsilateral click (ms)	Vm rel Mon ipsi (mV)	Vm rel Mon contra (mV)	Vm rel Binaural (mV)	Vm rel Binaural (mV)	Vm rel Binaural (mV)	Vm rel Binaural (mV)	Vm rel Binaural (mV)	Vm rel Binaural (mV)	Vm rel Binaural (mV)	Vm rel Binaural (mV)	Vm rel Binaural (mV)	Vm rel Binaural (mV)			Time from ipsilateral click (ms)	Vm rel Mon ipsi (mV)	Vm rel Mon contra (mV)	Vm rel Binaural (mV)	Vm rel Binaural (mV)	Vm rel Binaural (mV)	Vm rel Binaural (mV)	Vm rel Binaural (mV)	Vm rel Binaural (mV)	Vm rel Binaural (mV)	Vm rel Binaural (mV)	Vm rel Binaural (mV)	Vm rel Binaural (mV)			Time from ipsilateral click (ms)	Vm rel Mon ipsi (mV)	Vm rel Mon contra (mV)	Vm rel Binaural (mV)
	3.0077	0.106659	-0.262802	1.40174	1.22158	1.17537	1.32557	1.0267	0.878338	0.799152	0.744228	1.15767	1.09859			3.0077	0.106659	-0.602745	0.250866	0.267338	0.0473404	0.0389862	0.141434	-0.0154724	0.00975037	0.418224	0.0528984	0.299698			3.0077	0.106659	-0.518688	0.284126	-0.0648766	-0.097332	-0.11673	-0.00548172	-0.0738564	0.318634	0.0145493	0.124039	-0.0305977			3.0077	0.106659	-0.512367	-0.20536
	3.01794	0.0917091	-0.231697	1.42265	1.23227	1.20189	1.30794	1.11412	0.930931	0.841564	0.700645	1.13977	1.03258			3.01794	0.0917091	-0.580196	0.276806	0.211525	0.0586433	0.00505066	0.25021	-0.0695343	0.0479431	0.457729	0.0719147	0.304092			3.01794	0.0917091	-0.546852	0.3255	-0.161064	-0.185249	-0.129749	-0.00671387	-0.0802002	0.299553	0.0220947	0.108757	-0.030098			3.01794	0.0917091	-0.487133	-0.158783
	3.02818	0.0885582	-0.244228	1.35556	1.29303	1.24927	1.35793	0.99358	0.898445	0.837654	0.747253	1.12894	0.954678			3.02818	0.0885582	-0.578423	0.212231	0.358761	0.0940704	0.0953979	0.22179	-0.086998	0.0904198	0.557247	0.0422668	0.175648			3.02818	0.0885582	-0.521706	0.403145	-0.222458	-0.0928383	-0.193264	-0.0496597	-0.161701	0.341919	0.0736771	0.06987	0.0619469			3.02818	0.0885582	-0.4884	-0.171654
	3.03842	0.0596924	-0.270508	1.35992	1.18386	1.23245	1.41474	0.948971	0.95327	0.749989	0.788727	1.11809	0.860992			3.03842	0.0596924	-0.60775	0.194683	0.482334	0.124851	0.0838814	0.184254	-0.0965843	-0.0410576	0.432781	0.0700569	0.211159			3.03842	0.0596924	-0.481865	0.432766	-0.156296	-0.0742302	-0.264931	-0.0108833	-0.157925	0.345543	0.184494	0.0548363	0.119308			3.03842	0.0596924	-0.4963	-0.138443
	3.04866	0.0615997	-0.273666	1.40099	1.10178	1.15151	1.35337	0.956638	0.96339	0.788563	0.769165	1.05051	0.859299			3.04866	0.0615997	-0.602375	0.326633	0.395695	0.149696	0.110741	0.0957527	-0.0986099	-0.0695572	0.470165	0.0316086	0.2379			3.04866	0.0615997	-0.501976	0.335278	-0.179794	-0.00660324	-0.140678	-0.0157242	-0.0273514	0.292351	0.0833817	0.0980377	0.0389938			3.04866	0.0615997	-0.491264	-0.136097
	3.0589	0.0352783	-0.249928	1.37778	1.14404	1.21676	1.35336	1.02851	0.923981	0.803108	0.701027	1.03567	0.963642			3.0589	0.0352783	-0.577343	0.308384	0.406288	0.0210304	0.191544	0.144081	-0.0417252	-0.0717278	0.537674	0.00233078	0.274242			3.0589	0.0352783	-0.514874	0.303772	-0.181282	-0.00466156	-0.1171	-0.0670319	0.0119247	0.362267	0.0386429	0.120209	0.0122108			3.0589	0.0352783	-0.501564	-0.185532
	3.06914	0.0641251	-0.259201	1.37719	1.1065	1.20076	1.27598	0.970142	1.0222	0.81461	0.654556	1.05059	0.932816			3.06914	0.0641251	-0.601002	0.341633	0.46574	-0.0563965	0.160484	0.140038	-0.0162201	-0.0588684	0.578934	0.02882	0.273003			3.06914	0.0641251	-0.521206	0.294712	-0.0912094	-0.175404	-0.213341	0.0447388	-0.0583229	0.299393	-0.039238	0.117889	-0.0195465			3.06914	0.0641251	-0.47794	-0.287884
	3.07938	0.0575066	-0.257431	1.38036	1.09166	1.09734	1.26192	0.905842	1.02973	0.768154	0.712376	1.04307	0.887299			3.07938	0.0575066	-0.602959	0.292652	0.392521	-0.0814667	0.133034	0.140656	-0.0809174	-0.0922089	0.509575	0.00453949	0.328735			3.07938	0.0575066	-0.55024	0.342541	-0.177181	-0.147457	-0.241673	0.0461845	-0.138897	0.368534	-0.00927734	0.132385	-0.00137711			3.07938	0.0575066	-0.481689	-0.252853
	3.08962	0.102551	-0.2677	1.31027	1.04624	1.10814	1.30361	0.914684	0.949455	0.749451	0.761585	1.04674	0.964085			3.08962	0.102551	-0.595409	0.091259	0.381531	-0.0434952	0.190861	0.063446	-0.0181274	-0.116566	0.449211	-0.00568008	0.301651			3.08962	0.102551	-0.525669	0.318508	-0.185707	-0.141762	-0.207237	0.00312424	-0.156075	0.423241	-0.0218925	0.135685	-0.0856743			3.08962	0.102551	-0.524784	-0.258369
	3.09986	0.0892258	-0.276237	1.33474	1.04762	1.18066	1.26754	0.946728	0.863602	0.777775	0.824478	1.11604	0.973217			3.09986	0.0892258	-0.556614	0.0871925	0.382782	0.0654144	0.161385	0.0511703	-0.040493	-0.0913734	0.456768	0.112591	0.369156			3.09986	0.0892258	-0.512764	0.31419	-0.193539	-0.142166	-0.151566	0.00871277	-0.067852	0.425793	-0.0498734	0.129009	-0.0862083			3.09986	0.0892258	-0.480259	-0.261528
	3.1101	0.0956268	-0.31321	1.29967	1.12576	1.15097	1.3018	0.959976	0.918186	0.803501	0.873199	1.16305	1.01335			3.1101	0.0956268	-0.563862	0.197697	0.327171	0.0583191	0.148159	0.15942	-0.0598755	0.0391121	0.400009	0.104424	0.405777			3.1101	0.0956268	-0.512367	0.38718	-0.221909	-0.138008	-0.0635757	-0.0570526	-0.0826797	0.32164	-0.0172806	0.0869179	0.00585556			3.1101	0.0956268	-0.446953	-0.165447
	3.12034	0.114334	-0.30558	1.38045	1.15874	1.16298	1.32745	0.990002	0.888969	0.809498	0.80706	1.19475	1.07388			3.12034	0.114334	-0.60672	0.160423	0.213875	0.112144	0.113152	0.151627	-0.01931	-0.0284538	0.486053	0.086937	0.31823			3.12034	0.114334	-0.487133	0.400379	-0.237064	-0.148212	-0.0849991	-0.170921	-0.107525	0.235401	-0.0340271	0.16024	-0.113556			3.12034	0.114334	-0.416832	-0.24131
	3.13058	0.0808258	-0.323997	1.3405	1.09154	1.19053	1.22699	0.991329	0.878273	0.730175	0.83567	1.10482	0.985386			3.13058	0.0808258	-0.590698	0.128819	0.260471	0.147011	0.0295219	0.146061	-0.101067	-0.0510941	0.512043	0.100906	0.27216			3.13058	0.0808258	-0.4884	0.396206	-0.186981	-0.163326	-0.0542679	-0.140808	-0.128395	0.250565	-0.072937	0.115623	-0.152725			3.13058	0.0808258	-0.423897	-0.176247
	3.14082	0.0544052	-0.298355	1.30199	0.966618	1.22677	1.18999	0.91148	0.985611	0.690228	0.845772	1.11499	1.00101			3.14082	0.0544052	-0.598824	0.0311775	0.315643	0.0921631	0.0731049	0.178875	-0.135708	-0.0919228	0.50798	0.0521355	0.197113			3.14082	0.0544052	-0.4963	0.290825	-0.234917	-0.105774	-0.0245934	-0.078476	-0.173016	0.256882	-0.0609818	0.0668678	-0.207195			3.14082	0.0544052	-0.445881	-0.214214
	3.15106	0.0778046	-0.300785	1.32144	1.05239	1.18124	1.20604	1.00161	1.0121	0.6604	0.825062	1.1181	0.908352			3.15106	0.0778046	-0.590866	0.137939	0.284042	0.111214	0.182243	0.159157	-0.187183	0.0202408	0.536407	0.0794373	0.158253			3.15106	0.0778046	-0.491264	0.31295	-0.248325	-0.0773888	-0.0446663	-0.0368004	-0.0852394	0.310932	-0.00417709	0.179211	0.081234			3.15106	0.0778046	-0.458008	-0.147385
	3.1613	0.0811157	-0.306973	1.34084	1.09426	1.13413	1.22751	1.10949	0.979378	0.733967	0.777878	1.11979	0.860397			3.1613	0.0811157	-0.572269	0.291634	0.275532	0.159096	0.146206	0.224167	-0.115761	0.0122185	0.558502	0.061615	0.201191			3.1613	0.0811157	-0.501564	0.344948	-0.21521	-0.213642	-0.0908165	-0.120422	-0.0680962	0.356819	0.0161438	0.199677	0.280823			3.1613	0.0811157	-0.424278	-0.0848961
	3.17154	0.0235748	-0.319466	1.39447	1.16855	1.10194	1.33542	1.11719	0.955917	0.791473	0.802116	0.915966	0.930527			3.17154	0.0235748	-0.559589	0.216167	0.343014	0.194565	0.150185	0.204281	-0.120068	-0.0680809	0.565281	-0.0166092	0.244465			3.17154	0.0235748	-0.47794	0.316933	-0.264553	-0.169823	-0.14167	-0.0490303	-0.178341	0.371777	0.00665665	0.135349	0.0925369			3.17154	0.0235748	-0.440334	-0.104874
	3.18178	0.0424919	-0.317413	1.32965	1.17326	1.12951	1.37602	1.09958	1.08154	0.84502	0.762157	0.945614	0.922981			3.18178	0.0424919	-0.563225	0.213791	0.395634	0.156879	0.130089	0.152927	-0.107979	-0.105728	0.523224	0.0670128	0.225525			3.18178	0.0424919	-0.481689	0.273598	-0.204208	-0.0790329	-0.066246	0.0154495	-0.160786	0.373749	-0.0836906	0.117779	-0.00268936			3.18178	0.0424919	-0.458363	-0.155933
	3.19202	0.0837784	-0.307163	1.32406	1.11495	1.05397	1.28912	1.02736	1.04189	0.85313	0.857796	1.0288	0.885311			3.19202	0.0837784	-0.552025	0.15556	0.367664	0.0374565	0.123138	0.144188	-0.0620613	-0.0802078	0.420029	0.15517	0.250641			3.19202	0.0837784	-0.524784	0.329556	-0.199631	-0.0672569	-0.0456924	0.0134735	-0.0737	0.332119	-0.0698624	0.167011	-0.112972			3.19202	0.0837784	-0.466469	-0.21833
	3.20226	0.0913086	-0.311592	1.20734	1.07357	0.959816	1.31343	0.882847	0.992119	0.864891	0.801876	1.11651	0.865093			3.20226	0.0913086	-0.518688	0.13303	0.415802	0.108971	0.153374	0.108612	-0.110016	-0.110271	0.497665	0.177376	0.225502			3.20226	0.0913086	-0.480259	0.285877	-0.227585	-0.0718002	-0.0725632	-0.00333405	-0.0494041	0.257645	-0.00946808	0.206566	-0.157112			3.20226	0.0913086	-0.451561	-0.184162
	3.2125	0.090023	-0.354008	1.27522	1.04147	1.05342	1.33706	0.928108	1.04671	0.813801	0.822762	1.11299	0.901344			3.2125	0.090023	-0.546852	0.16209	0.385235	0.132935	0.114605	0.0852509	-0.111317	-0.0759468	0.540405	0.0709152	0.254707			3.2125	0.090023	-0.446953	0.356853	-0.201946	-0.100754	-0.115646	0.0164757	-0.0188408	0.332031	-0.0190201	0.138466	-0.163326			3.2125	0.090023	-0.431362	-0.21487
	3.22274	0.1194	-0.369553	1.3686	0.968479	1.04331	1.28975	0.905258	0.954964	0.719257	0.812775	1.08585	0.996876			3.22274	0.1194	-0.521706	0.167538	0.421619	0.0129242	0.112301	0.136906	-0.0968552	-0.0493889	0.429348	0.100727	0.222427			3.22274	0.1194	-0.416832	0.385166	-0.183643	-0.093647	-0.106491	-0.0216713	-0.0690765	0.407112	0.0277481	0.123215	-0.145374			3.22274	0.1194	-0.419067	-0.157566
	3.23298	0.114967	-0.362282	1.41564	0.997604	1.1507	1.15758	0.830086	0.886612	0.801296	0.782448	1.23064	0.973312			3.23298	0.114967	-0.481865	0.151707	0.388161	0.0945587	0.177761	0.0919724	-0.126564	-0.0632324	0.427975	0.000637054	0.206581			3.23298	0.114967	-0.423897	0.335419	-0.137691	-0.138756	-0.12405	-0.0120049	0.00161362	0.436985	0.0812111	0.192322	-0.142857			3.23298	0.114967	-0.421089	-0.182518
	3.24322	0.110466	-0.363247	1.29949	1.05765	1.17242	1.27662	0.896652	0.923195	0.734001	0.806049	1.25063	0.864792			3.24322	0.110466	-0.501976	0.0833664	0.442211	0.127449	0.115593	0.129704	-0.183891	-0.0675316	0.494469	-0.0208054	0.229816			3.24322	0.110466	-0.445881	0.259624	-0.196747	-0.127743	-0.191166	0.044323	-0.0687332	0.413002	-0.00810242	0.153008	-0.112312			3.24322	0.110466	-0.415611	-0.153152
	3.25346	0.0966797	-0.389954	1.29961	1.08525	1.19609	1.32431	0.944622	0.914612	0.703808	0.844818	1.20838	0.899448			3.25346	0.0966797	-0.514874	0.0823174	0.408783	0.0990524	0.124596	0.185684	-0.102722	-0.125816	0.494495	-0.00764465	0.212601			3.25346	0.0966797	-0.458008	0.239899	-0.18671	-0.28653	-0.228573	0.038517	-0.142761	0.358036	-0.0517311	0.274006	-0.118217			3.25346	0.0966797	-0.434761	-0.12215
	3.2637	0.098114	-0.404835	1.26324	1.00945	1.22282	1.25846	0.965553	0.839355	0.6805	0.862709	1.09417	0.98827			3.2637	0.098114	-0.521206	0.119774	0.337376	0.0613365	0.100227	0.0919952	0.00497437	-0.0739441	0.446182	0.0593033	0.206787			3.2637	0.098114	-0.424278	0.291779	-0.135925	-0.228035	-0.152115	-0.0114555	-0.055294	0.32412	-0.0771484	0.246834	-0.0189972			3.2637	0.098114	-0.412575	-0.134811
	3.27394	0.108913	-0.400822	1.21328	1.05419	1.20627	1.21619	0.917347	0.805031	0.743767	0.739777	1.0644	1.04173			3.27394	0.108913	-0.55024	0.185291	0.319885	0.0712051	0.0540009	0.0873604	-0.0364647	-0.0275879	0.469364	0.082428	0.264469			3.27394	0.108913	-0.440334	0.324444	-0.21397	-0.124157	-0.135384	-0.0125771	-0.0570259	0.352013	-0.0783958	0.138203	0.00154114			3.27394	0.108913	-0.382256	-0.146778
	3.28418	0.102943	-0.44112	1.19428	1.04828	1.20678	1.25796	0.926834	0.911217	0.75354	0.709286	1.12217	0.987068			3.28418	0.102943	-0.525669	0.158405	0.340641	0.0959892	0.0849075	0.107605	-0.14106	-0.0728493	0.39547	0.0207024	0.254288			3.28418	0.102943	-0.458363	0.330269	-0.210766	-0.107513	-0.0886459	-0.0106926	-0.0500259	0.38221	-0.0094223	0.0847244	-0.0859451			3.28418	0.102943	-0.371788	-0.124687
	3.29442	0.0762787	-0.425419	1.21149	0.912857	1.21848	1.33666	0.888412	1.0047	0.759823	0.751808	1.0993	0.96743			3.29442	0.0762787	-0.512764	0.0530243	0.446308	0.106312	0.0124664	0.215321	-0.0778275	-0.0756531	0.432354	0.113125	0.24852			3.29442	0.0762787	-0.466469	0.394165	-0.284435	-0.14056	-0.0124702	0.0110741	-0.083683	0.41938	0.0540466	0.13187	-0.164089			3.29442	0.0762787	-0.378784	-0.101562
	3.30466	0.0937424	-0.411011	1.20385	0.914085	1.12943	1.36749	1.00907	0.920834	0.783703	0.69976	1.02439	0.905815			3.30466	0.0937424	-0.512367	0.0352402	0.345875	0.122261	0.100777	0.160805	-0.040947	-0.0564461	0.368492	0.105446	0.310246			3.30466	0.0937424	-0.451561	0.248436	-0.199821	-0.182865	-0.0252037	-0.0232811	-0.0301094	0.46283	0.00400162	0.233021	-0.114174			3.30466	0.0937424	-0.388813	-0.0598526
	3.3149	0.126839	-0.444084	1.25555	0.947662	1.16911	1.35335	0.942619	0.958263	0.80685	0.736622	1.08969	0.953316			3.3149	0.126839	-0.487133	0.0312958	0.277328	0.136902	0.245808	0.125877	-0.127243	0.0298386	0.408821	0.0203552	0.281681			3.3149	0.126839	-0.431362	0.288754	-0.200012	-0.122581	-0.00665283	-0.00318146	0.0292816	0.386742	0.0633278	0.235451	-0.100632			3.3149	0.126839	-0.412498	-0.0587387
	3.32514	0.116776	-0.475075	1.28547	1.00287	1.16413	1.37257	0.878876	0.985397	0.804729	0.780441	1.09039	0.856079			3.32514	0.116776	-0.4884	0.149418	0.319019	0.0788345	0.168213	0.126579	-0.1021	0.0404587	0.404648	0.0234795	0.285332			3.32514	0.116776	-0.419067	0.431835	-0.196365	-0.217747	0.0517349	-0.140751	0.069767	0.361572	0.0297737	0.118271	-0.0405731			3.32514	0.116776	-0.409355	-0.137321
	3.33538	0.116505	-0.449841	1.24008	1.05087	1.1162	1.38902	0.94463	1.03999	0.85004	0.795631	1.10619	1.0159			3.33538	0.116505	-0.4963	0.139214	0.316608	0.0537796	0.210625	0.166706	-0.0948181	-0.0553131	0.531925	0.0021553	0.234116			3.33538	0.116505	-0.421089	0.331177	-0.0468292	-0.144493	-0.0123138	-0.130032	-0.0315247	0.404297	0.0595512	0.173069	-0.0253525			3.33538	0.116505	-0.347694	-0.23362
	3.34562	0.12035	-0.46067	1.3056	1.07398	1.0903	1.40308	1.05222	0.921288	0.773472	0.749092	1.13428	1.04032			3.34562	0.12035	-0.491264	0.162544	0.233768	0.0381851	0.219662	0.156586	-0.0389824	-0.0308304	0.483147	-0.0492859	0.219112			3.34562	0.12035	-0.415611	0.330914	-0.131275	-0.125229	0.0584259	-0.0186577	0.0162621	0.341095	0.0968513	0.223278	0.000671387			3.34562	0.12035	-0.35754	-0.103649
	3.35586	0.121902	-0.45932	1.38968	1.02247	1.11221	1.41967	1.06533	0.972797	0.778561	0.714138	1.17834	0.928642			3.35586	0.121902	-0.501564	0.139927	0.247944	0.161449	0.206371	0.0736046	-0.00691223	-0.0745316	0.444809	0.00459671	0.158577			3.35586	0.121902	-0.434761	0.370815	-0.111679	-0.109219	-0.0240326	0.0396118	0.0286598	0.275887	0.0758705	0.119152	-0.0507317			3.35586	0.121902	-0.364773	-0.0687065
	3.3661	0.124226	-0.471809	1.36868	1.11588	1.0968	1.38905	0.939068	1.02971	0.781914	0.678673	1.12696	0.934673			3.3661	0.124226	-0.47794	0.128094	0.320736	0.135803	0.199913	0.0973587	0.0458488	-0.113728	0.475151	0.0510864	0.225105			3.3661	0.124226	-0.412575	0.272896	-0.00965881	-0.152325	-0.0476379	0.0587349	-0.0833092	0.333298	-0.0307045	0.239433	-0.0392303			3.3661	0.124226	-0.374554	-0.0996552
	3.37634	0.114689	-0.474419	1.35442	1.16482	1.03857	1.3965	0.875504	1.05334	0.69347	0.64769	1.13044	0.97599			3.37634	0.114689	-0.481689	0.0727081	0.287525	0.0915756	0.22504	0.0478668	-0.0149574	-0.209427	0.527195	0.049202	0.268322			3.37634	0.114689	-0.382256	0.203861	-0.129086	-0.16185	-0.0469093	-0.0392075	-0.0564384	0.441006	0.0213089	0.210945	0.0646019			3.37634	0.114689	-0.388012	-0.100266
	3.38658	0.105793	-0.485329	1.38053	1.15954	1.06653	1.31437	0.996239	0.981678	0.764301	0.682465	1.19799	0.974003			3.38658	0.105793	-0.524784	0.151981	0.224606	0.107147	0.157448	0.0704918	-0.109299	-0.18716	0.481754	-0.0730438	0.241524			3.38658	0.105793	-0.371788	0.173557	-0.197803	-0.202858	-0.0351067	-0.0592575	-0.0141678	0.372086	0.0702438	0.197937	-0.0403595			3.38658	0.105793	-0.348656	-0.171227
	3.39682	0.156338	-0.517635	1.3712	1.03824	1.05561	1.37496	0.982418	0.93539	0.844784	0.719765	1.12865	0.920383			3.39682	0.156338	-0.480259	0.175453	0.239292	0.116943	0.131874	0.0857239	-0.0586128	-0.133205	0.413837	0.0383301	0.239902			3.39682	0.156338	-0.378784	0.266563	-0.233498	-0.199718	0.00392151	-0.0351562	-0.0329933	0.257401	0.107506	0.18642	-0.0302162			3.39682	0.156338	-0.33197	-0.0963402
	3.40706	0.110218	-0.512169	1.35835	1.08426	1.03924	1.36198	0.981838	0.918655	0.783211	0.772682	1.07315	0.974884			3.40706	0.110218	-0.446953	0.213329	0.273441	0.11367	0.166508	0.0608368	0.0280991	-0.0946655	0.334148	-0.0179825	0.237598			3.40706	0.110218	-0.388813	0.305401	-0.142078	-0.214169	-0.000297546	0.0468597	-0.0107002	0.256851	0.0159073	0.158524	-0.0149841			3.40706	0.110218	-0.351295	-0.0253754
	3.4173	0.11525	-0.505493	1.35892	1.14988	1.07663	1.26269	1.01796	0.856567	0.738743	0.697937	1.06598	0.910332			3.4173	0.11525	-0.416832	0.308102	0.291363	0.162567	0.186203	-0.0177574	0.04599	-0.112179	0.452366	0.0207748	0.23214			3.4173	0.11525	-0.412498	0.263321	-0.0646477	-0.237392	-0.0494003	-0.0342331	-0.0403862	0.325142	-0.0195084	0.145473	-0.0746117			3.4173	0.11525	-0.33839	-0.0568008
	3.42754	0.11367	-0.51614	1.36987	1.10751	1.11515	1.28492	0.995499	0.961639	0.703545	0.698975	1.09228	0.929237			3.42754	0.11367	-0.423897	0.248863	0.26585	0.1493	0.094635	0.0317383	-0.0503883	-0.0461578	0.485767	0.0641518	0.196556			3.42754	0.11367	-0.409355	0.229561	-0.105957	-0.113808	-0.0151901	-0.00984573	-0.0182457	0.394882	0.0875893	0.121632	-0.0868988			3.42754	0.11367	-0.324699	-0.0419922
	3.43778	0.11314	-0.548927	1.33795	1.089	1.22031	1.37638	0.959484	0.896061	0.733475	0.691631	1.13264	0.968113			3.43778	0.11314	-0.445881	0.254265	0.271488	0.0757942	0.165516	0.131645	-0.0477295	-0.102188	0.39901	0.0677299	0.212982			3.43778	0.11314	-0.347694	0.278645	-0.0787849	-0.0270958	-0.130512	-0.0962219	0.0495377	0.336243	0.0452461	0.223804	-0.107616			3.43778	0.11314	-0.317951	-0.163525
	3.44802	0.126446	-0.546246	1.33392	1.03581	1.22225	1.2599	1.01449	0.895321	0.761631	0.651649	1.065	0.946571			3.44802	0.126446	-0.458008	0.238827	0.372425	0.128189	0.173645	0.0790405	-0.0737991	-0.0991135	0.470501	0.136383	0.269371			3.44802	0.126446	-0.35754	0.3773	-0.0927086	0.00304031	-0.0809059	-0.0785713	0.0107231	0.360691	0.0553665	0.236656	-0.0559921			3.44802	0.126446	-0.322197	-0.227436
	3.45826	0.131538	-0.546028	1.38829	1.09837	1.14078	1.24291	1.06613	0.93652	0.871964	0.69907	1.11446	1.05118			3.45826	0.131538	-0.424278	0.135948	0.366161	0.157429	0.163563	0.0264549	-0.00212097	-0.0622406	0.444344	0.120171	0.283516			3.45826	0.131538	-0.364773	0.311615	-0.0879402	-0.0644798	0.0430336	0.02668	-0.052887	0.354683	0.0358887	0.223507	0.00940704			3.45826	0.131538	-0.319561	-0.0989304
	3.4685	0.0776634	-0.560429	1.34269	1.04079	1.06386	1.4265	0.994522	0.985313	0.799915	0.742867	1.05696	1.04772			3.4685	0.0776634	-0.440334	0.203075	0.317825	0.164238	0.190121	0.0425377	-0.00959396	-0.0738411	0.44754	0.129448	0.275021			3.4685	0.0776634	-0.374554	0.279285	-0.0222244	-0.122662	0.0984879	0.00205231	-0.0116081	0.338867	-0.0232162	0.160862	-0.0368538			3.4685	0.0776634	-0.300072	-0.107094
	3.47874	0.0364037	-0.567169	1.33203	1.02725	1.12395	1.40488	1.02944	0.987137	0.77713	0.700405	1.08472	0.944901			3.47874	0.0364037	-0.458363	0.207726	0.342003	0.144093	0.265785	0.0830231	-0.0523911	-0.103462	0.496895	0.109978	0.231113			3.47874	0.0364037	-0.388012	0.369598	-0.0898018	-0.124775	0.0977249	-0.0334625	0.015667	0.285149	-0.0750122	0.205658	-0.00768661			3.47874	0.0364037	-0.301456	-0.144253
	3.48898	0.0480766	-0.527908	1.29288	1.0388	1.11499	1.44202	1.02376	0.967636	0.824902	0.636139	1.19814	1.01583			3.48898	0.0480766	-0.466469	0.149132	0.250805	0.0687599	0.227783	0.117149	-0.0464058	0.0550957	0.525871	0.091465	0.240738			3.48898	0.0480766	-0.348656	0.358299	-0.146046	-0.0932884	0.0975342	-0.0639191	0.0184822	0.268581	0.00934982	0.200127	-0.008461			3.48898	0.0480766	-0.293694	-0.188606
	3.49922	0.0793762	-0.525612	1.3632	1.11715	1.16169	1.41771	1.06308	0.908688	0.839214	0.727882	1.18507	1.11785			3.49922	0.0793762	-0.451561	0.175468	0.187565	0.0645409	0.270348	0.0227127	-0.0393143	0.0616188	0.527077	0.114712	0.2929			3.49922	0.0793762	-0.33197	0.282063	-0.109249	-0.0461693	0.0662308	-0.020134	-0.0270195	0.312641	0.029213	0.137844	-0.168858			3.49922	0.0793762	-0.271252	-0.140701
	3.50946	0.0802536	-0.557972	1.36602	1.1845	1.1694	1.37819	1.0104	0.945915	0.878242	0.758923	1.09983	0.976696			3.50946	0.0802536	-0.431362	0.232792	0.231209	0.128605	0.272415	0.0278511	0.00217056	0.00790405	0.520855	0.066597	0.185669			3.50946	0.0802536	-0.351295	0.336872	-0.0854607	-0.00203705	0.0258102	-0.00623322	-0.0238457	0.337063	-0.0324211	0.260437	-0.0581932			3.50946	0.0802536	-0.269463	-0.03125
	3.5197	0.0927963	-0.559761	1.45873	1.07781	1.18489	1.30495	1.06773	0.980225	0.847702	0.836933	1.03918	0.940384			3.5197	0.0927963	-0.419067	0.226536	0.286053	0.0259781	0.359375	0.0664978	-0.0107994	-0.0579147	0.538948	0.0189972	0.213581			3.5197	0.0927963	-0.33839	0.278534	-0.0966835	-0.0412445	0.022686	0.0674973	0.0557709	0.418915	-0.013546	0.232971	0.00949478			3.5197	0.0927963	-0.290688	-0.0799599
	3.52994	0.130665	-0.559822	1.45963	1.03732	1.17239	1.42519	1.1222	0.889481	0.863415	0.782501	1.07422	1.01096			3.52994	0.130665	-0.421089	0.167789	0.299778	0.0758095	0.289139	0.0723724	0.048748	-0.117455	0.561298	0.0627136	0.227386			3.52994	0.130665	-0.324699	0.309956	-0.130928	-0.129974	0.0799789	0.0401993	0.0795403	0.392735	0.0422668	0.123215	-0.0290833			3.52994	0.130665	-0.268726	-0.140793
	3.54018	0.141842	-0.572136	1.34402	1.04343	1.11938	1.42177	1.0834	0.921501	0.91526	0.766243	1.1155	1.03538			3.54018	0.141842	-0.415611	0.267769	0.292385	0.124863	0.185726	0.0881958	0.139046	-0.140583	0.559105	0.116024	0.197105			3.54018	0.141842	-0.317951	0.354778	-0.149445	-0.043644	0.0674858	-0.00113297	0.048687	0.403725	0.0833092	0.150574	-0.106926			3.54018	0.141842	-0.26086	-0.129623
	3.55042	0.13792	-0.581993	1.35234	0.999298	1.14958	1.45523	1.01403	0.981964	0.844761	0.746048	1.08202	1.08878			3.55042	0.13792	-0.434761	0.234821	0.340248	0.0822067	0.204094	0.181179	0.0741234	-0.0746994	0.527386	0.0567513	0.132732			3.55042	0.13792	-0.322197	0.365128	-0.169434	-0.0429039	0.0612717	-0.0845566	0.0601006	0.421295	0.107533	0.178074	-0.0636292			3.55042	0.13792	-0.256882	-0.0677414
	3.56066	0.12809	-0.586075	1.49879	0.994347	1.1615	1.44666	0.97963	1.02873	0.8465	0.751831	1.06749	1.03731			3.56066	0.12809	-0.412575	0.212646	0.251125	-0.000953674	0.127178	0.0809937	0.0347137	-0.098732	0.545959	0.0774231	0.174072			3.56066	0.12809	-0.319561	0.376644	-0.043087	-0.115868	0.127209	-0.0215034	0.0253944	0.347782	0.0605392	0.165905	-0.0490379			3.56066	0.12809	-0.227047	-0.00812531
	3.5709	0.123943	-0.576332	1.48663	1.19366	1.13181	1.44181	1.02788	1.05512	0.860409	0.84024	1.04834	0.969959			3.5709	0.123943	-0.382256	0.192181	0.177517	-0.0139809	0.181801	0.212101	0.0514183	-0.129105	0.44743	0.0833435	0.330574			3.5709	0.123943	-0.300072	0.348927	0.0358772	-0.138531	0.0830307	0.064518	0.0245743	0.358582	0.0273743	0.0284195	-0.149952			3.5709	0.123943	-0.226723	-0.0604935
	3.58114	0.0977592	-0.556858	1.43449	1.17082	1.11797	1.4197	1.01976	1.01138	0.849442	0.906544	1.11132	0.982468			3.58114	0.0977592	-0.371788	0.22768	0.204674	-0.0208206	0.146744	0.196259	0.0190163	-0.0972862	0.446571	0.101837	0.324814			3.58114	0.0977592	-0.301456	0.374012	-0.0153427	-0.119709	0.196289	0.110329	0.0781822	0.355698	0.044136	0.0255814	-0.0964508			3.58114	0.0977592	-0.231026	-0.142998
	3.59138	0.111618	-0.566345	1.4969	1.10037	1.09563	1.32638	0.992718	0.987732	0.785751	0.787296	1.27979	1.08279			3.59138	0.111618	-0.378784	0.243702	0.274982	0.0405235	0.0532837	0.247482	0.0593185	-0.164177	0.444332	0.0774078	0.179321			3.59138	0.111618	-0.293694	0.318062	-0.150112	-0.116695	0.0731812	0.00260925	0.00395203	0.371181	-0.00159454	0.0758324	0.00296021			3.59138	0.111618	-0.22718	-0.085434
	3.60162	0.123898	-0.586472	1.53249	1.00805	1.09068	1.36005	1.0997	0.907242	0.761959	1.14589	1.20833	1.06757			3.60162	0.123898	-0.388813	0.238697	0.315514	0.116993	0.0161629	0.255615	0.0600471	-0.0865479	0.494518	0.0961151	0.160423			3.60162	0.123898	-0.271252	0.347141	-0.108231	-0.0667534	0.0175362	-0.0456314	0.0863991	0.352394	0.0454712	0.139893	0.0506554			3.60162	0.123898	-0.218334	-0.00666046
	3.61186	0.117794	-0.602745	1.46454	0.975216	1.15874	1.27662	1.0641	0.796165	0.760265	1.21867	1.01795	1.07721			3.61186	0.117794	-0.412498	0.245621	0.294247	0.109497	0.0888786	0.204388	0.0514908	-0.170097	0.53616	0.118286	0.196796			3.61186	0.117794	-0.269463	0.319324	-0.127724	-0.02911	0.0287743	-0.100243	0.179619	0.382267	0.0554733	0.0510368	-0.0150528			3.61186	0.117794	-0.216637	-0.151009
	3.6221	0.125488	-0.580196	1.32824	1.00548	1.1507	1.30603	0.98613	0.822105	0.713093	1.01029	1.06878	1.02822			3.6221	0.125488	-0.409355	0.180794	0.296608	0.10519	0.196774	0.247101	0.0701332	-0.171711	0.521618	0.0977364	0.304703			3.6221	0.125488	-0.290688	0.288593	-0.169353	-0.091671	0.0389214	-0.0011673	0.0123787	0.434265	0.0183144	0.00942993	-0.00979614			3.6221	0.125488	-0.20277	-0.160332
	3.63234	0.13765	-0.578423	1.26754	1.03346	1.15409	1.28204	1.0224	0.961403	0.771458	0.962463	1.04607	0.979416			3.63234	0.13765	-0.347694	0.241257	0.325932	0.139332	0.221237	0.189213	0.0673523	-0.106964	0.470119	0.0386314	0.292664			3.63234	0.13765	-0.268726	0.336529	-0.140774	-0.159679	0.0288925	-0.0282288	-0.0761948	0.550751	-0.00166321	0.0800133	-0.100487			3.63234	0.13765	-0.204773	-0.100597
	3.64258	0.122272	-0.60775	1.31363	1.0265	1.12076	1.2669	1.03175	0.988354	0.832134	0.849667	1.03336	1.01327			3.64258	0.122272	-0.35754	0.135342	0.331688	0.189724	0.150688	0.152618	0.142494	-0.063858	0.513939	0.0773048	0.28738			3.64258	0.122272	-0.26086	0.329975	-0.208988	-0.063343	0.0539513	0.0168114	-0.0276871	0.469482	-0.0103416	0.102974	-0.103706			3.64258	0.122272	-0.175819	-0.161072
	3.65282	0.0987282	-0.602375	1.32944	0.99205	1.08495	1.35456	1.05812	1.02799	0.775555	0.875046	1.07599	0.974144			3.65282	0.0987282	-0.364773	0.118183	0.294151	0.124207	0.20047	0.133194	0.102917	-0.057518	0.446571	0.123009	0.239101			3.65282	0.0987282	-0.256882	0.331882	-0.175678	-0.0968819	0.0260086	0.0861511	-0.0107956	0.451019	0.064846	0.172256	-0.0159454			3.65282	0.0987282	-0.182762	-0.16745
	3.66306	0.112247	-0.577343	1.31269	1.07193	1.11004	1.41052	0.971645	0.997055	0.800892	0.825607	1.15901	1.05788			3.66306	0.112247	-0.374554	0.0927467	0.237133	0.0543823	0.189384	0.136406	0.118889	-0.0575409	0.4491	0.149353	0.209026			3.66306	0.112247	-0.227047	0.337444	-0.174862	-0.0757675	0.0780945	0.126366	-0.00624466	0.457241	-0.0220261	0.184624	-0.0503883			3.66306	0.112247	-0.176498	-0.13327
	3.6733	0.0923767	-0.601002	1.33055	1.05786	1.18348	1.42204	1.02472	1.09879	0.831059	0.786163	1.22329	1.07204			3.6733	0.0923767	-0.388012	0.11541	0.301693	0.0627518	0.174267	0.0779762	0.0344162	-0.0531235	0.428024	0.0912132	0.200516			3.6733	0.0923767	-0.226723	0.335125	-0.164997	-0.0341988	0.0937805	0.176025	0.00789642	0.449169	-0.000312805	0.205532	-0.032196			3.6733	0.0923767	-0.162952	-0.158508
	3.68354	0.116764	-0.602959	1.37776	1.009	1.09255	1.4969	1.02649	1.02959	0.871998	0.707092	1.05404	1.04045			3.68354	0.116764	-0.348656	0.171272	0.29134	0.0719681	0.138733	0.0862656	0.049614	0.0165825	0.451092	0.0540924	0.202049			3.68354	0.116764	-0.231026	0.282551	-0.223698	-0.0623436	0.0636559	0.0906487	-0.00642014	0.419342	0.00860214	0.143257	-0.10981			3.68354	0.116764	-0.13987	-0.193726
	3.69378	0.140339	-0.595409	1.31966	1.0122	1.19902	1.40521	1.09436	0.969826	0.888271	0.7052	1.07302	1.03829			3.69378	0.140339	-0.33197	0.249386	0.171089	-0.00952148	0.127907	0.176888	0.076046	-0.000358582	0.47472	0.0205002	0.263897			3.69378	0.140339	-0.22718	0.377644	-0.232056	-0.0637627	0.10487	0.0286369	0.0651779	0.385357	0.0234299	0.0638237	-0.089489			3.69378	0.140339	-0.120098	-0.126396
	3.70402	0.128426	-0.556614	1.25753	0.994011	1.1829	1.39006	1.01408	0.944023	0.889641	0.8237	1.07218	1.14758			3.70402	0.128426	-0.351295	0.240891	0.165047	-0.00231171	0.153969	0.0954208	0.0184669	-0.0565186	0.503937	0.0431862	0.291672			3.70402	0.128426	-0.218334	0.287273	-0.259174	-0.0497551	0.17947	0.0497932	0.138287	0.387764	0.0302277	0.124134	-0.107655			3.70402	0.128426	-0.151878	-0.144707
	3.71426	0.119411	-0.563862	1.30276	0.981926	1.11109	1.40327	1.09361	1.02599	0.825577	0.845875	1.14138	1.06311			3.71426	0.119411	-0.33839	0.168728	0.239086	-0.0046463	0.171562	0.0450668	0.0385895	-0.0778694	0.544682	0.0466309	0.226311			3.71426	0.119411	-0.216637	0.277699	-0.232391	-0.0363312	0.105824	0.11145	0.183029	0.450813	0.0793152	0.0975266	0.00276947			3.71426	0.119411	-0.144848	-0.153252
	3.7245	0.0962372	-0.60672	1.23788	1.04842	1.06973	1.44989	1.15021	1.03959	0.812153	0.794113	1.16697	0.985649			3.7245	0.0962372	-0.324699	0.259129	0.206303	0.0417404	0.172707	0.0352173	0.0771408	-0.111008	0.486641	0.112862	0.31575			3.7245	0.0962372	-0.20277	0.337128	-0.201946	-0.0794144	0.195621	0.00856018	0.137405	0.485527	0.0670166	0.118198	0.0554695			3.7245	0.0962372	-0.129879	-0.0804749
	3.73474	0.0905991	-0.590698	1.30102	1.03175	1.05221	1.42352	1.03367	1.04599	0.902958	0.896957	1.13073	0.946976			3.73474	0.0905991	-0.317951	0.186897	0.210812	-0.0137177	0.140785	0.0463066	0.0325432	-0.053894	0.392273	0.0992851	0.366676			3.73474	0.0905991	-0.204773	0.407063	-0.16766	-0.198002	0.242588	-0.0055542	0.128345	0.443829	0.0784683	0.194668	0.0562973			3.73474	0.0905991	-0.163742	-0.163933
	3.74498	0.0873566	-0.598824	1.38063	0.962448	1.10094	1.44001	1.05471	1.00571	0.784687	0.863373	1.1455	1.01613			3.74498	0.0873566	-0.322197	0.141239	0.149525	0.0277519	0.0941811	0.0788269	0.0109901	0.0317535	0.411667	0.0890579	0.332645			3.74498	0.0873566	-0.175819	0.446323	-0.197803	-0.182434	0.192631	0.0475769	0.184994	0.411201	0.103241	0.166153	0.0435486			3.74498	0.0873566	-0.13665	-0.127071
	3.75522	0.104656	-0.590866	1.43284	1.05025	1.08304	1.43122	1.04718	0.950706	0.833683	0.906551	1.1408	1.02629			3.75522	0.104656	-0.319561	0.138523	0.121189	0.0549316	0.150986	0.00921631	0.0847702	0.003479	0.45816	0.0914536	0.243717			3.75522	0.104656	-0.182762	0.339424	-0.169552	-0.074543	0.142635	0.100185	0.144413	0.456787	0.056263	0.224567	0.0102577			3.75522	0.104656	-0.108288	0.00346375
	3.76546	0.0922241	-0.572269	1.37897	1.1027	1.14164	1.46948	1.06154	0.92812	0.855736	0.846375	1.12677	1.03888			3.76546	0.0922241	-0.300072	0.196934	0.173569	0.0999451	0.149185	0.0764885	0.0641823	0.034523	0.462784	0.0839653	0.237328			3.76546	0.0922241	-0.176498	0.348499	-0.203552	-0.0635605	0.239742	0.0186234	0.144142	0.528538	0.105434	0.205196	-0.0503387			3.76546	0.0922241	-0.083168	0.00569153
	3.7757	0.0670166	-0.559589	1.32247	0.991177	0.977684	1.41165	1.03145	0.913406	0.864979	0.810867	1.04609	1.059			3.7757	0.0670166	-0.301456	0.231861	0.121487	0.0690842	0.230286	0.0678215	0.0278854	-0.0350952	0.460938	0.0998116	0.200611			3.7757	0.0670166	-0.162952	0.359898	-0.221241	-0.0585213	0.188778	0.0460014	0.16518	0.555874	0.118095	0.287094	-0.0930862			3.7757	0.0670166	-0.0720291	0.0183716
	3.78594	0.0855713	-0.563225	1.27185	1.01976	1.12354	1.40682	1.01194	0.939537	0.879864	0.835979	1.03724	1.00807			3.78594	0.0855713	-0.293694	0.208202	0.113979	-7.62939e-06	0.260025	0.0746307	0.00585556	-0.0353699	0.450863	0.0624123	0.141872			3.78594	0.0855713	-0.13987	0.402702	-0.166264	-0.139545	0.166534	0.0703354	0.218227	0.55814	0.115986	0.171509	-0.0653915			3.78594	0.0855713	-0.0430984	-0.0663605
	3.79618	0.0789719	-0.552025	1.38764	1.02137	1.18	1.31135	1.06488	0.995171	0.939686	0.816181	1.02473	0.987339			3.79618	0.0789719	-0.271252	0.0983009	0.0978851	-0.0411263	0.271183	0.0201111	-0.00486374	-0.106392	0.3573	0.172562	0.1758			3.79618	0.0789719	-0.120098	0.359715	-0.135784	-0.10458	0.188396	0.1063	0.165195	0.554348	0.162144	0.0917206	-0.0497055			3.79618	0.0789719	-0.0543022	-0.0530167
	3.80642	0.0671539	-0.518688	1.31866	1.02953	1.20167	1.36708	0.970119	1.00156	0.901932	0.910667	1.03622	0.932899			3.80642	0.0671539	-0.269463	0.0364456	0.125935	-0.0997391	0.201439	0.118248	-0.0579681	-0.0923767	0.250465	0.0793533	0.221054			3.80642	0.0671539	-0.151878	0.320019	-0.148262	-0.0172501	0.231827	0.123821	0.000530243	0.463093	0.088089	0.134552	-0.016819			3.80642	0.0671539	-0.061409	0.00802612
	3.81666	0.0533066	-0.546852	1.19017	0.979816	1.1845	1.48517	0.94754	1.04029	0.814945	0.873772	1.05866	0.90971			3.81666	0.0533066	-0.290688	0.199055	0.12064	-0.0542717	0.0912743	0.0967789	0.00999069	-0.104202	0.394241	0.19297	0.138248			3.81666	0.0533066	-0.144848	0.24276	-0.0661659	-0.0457878	0.173851	0.0810738	0.123482	0.497879	-0.0143471	0.130333	-0.0806503			3.81666	0.0533066	-0.0523071	0.0183182
	3.8269	0.0527153	-0.521706	1.23206	1.02454	1.15286	1.46583	1.03942	0.998573	0.804096	0.897171	1.05171	0.875179			3.8269	0.0527153	-0.268726	0.148823	0.121212	-0.0472412	0.174934	0.0134125	0.028553	-0.205662	0.415886	0.220951	0.172405			3.8269	0.0527153	-0.129879	0.27169	-0.0833321	-0.0315285	0.129307	0.116623	0.270481	0.499809	0.0180893	0.171627	-0.0532951			3.8269	0.0527153	-0.037735	-0.0115242
	3.83714	0.0700073	-0.481865	1.2103	1.03296	1.14774	1.40575	1.00557	1.04419	0.827698	0.848686	0.992989	0.951149			3.83714	0.0700073	-0.26086	0.173878	0.129318	-0.0320206	0.146576	-0.0296555	0.0765686	-0.151527	0.440277	0.183315	0.107567			3.83714	0.0700073	-0.163742	0.306213	-0.0483398	0.069416	0.134369	0.102261	0.20396	0.419006	0.141663	0.171272	-0.0186386			3.83714	0.0700073	-0.0167351	-0.0743561
	3.84738	0.0673866	-0.501976	1.31153	1.12778	1.09973	1.33822	1.04193	0.999573	0.793644	0.816898	1.08969	0.912682			3.84738	0.0673866	-0.256882	0.220825	0.168507	-0.0312576	0.140625	-0.0880585	0.1549	-0.125603	0.569515	0.043045	0.243599			3.84738	0.0673866	-0.13665	0.315025	-0.0518112	0.110138	0.155613	-0.0199661	0.104481	0.479057	0.174519	0.126793	0.0523834			3.84738	0.0673866	-0.000450134	-0.0614471
	3.85762	0.0725746	-0.514874	1.30037	1.10802	1.11668	1.35897	1.01107	1.03134	0.7103	0.843575	1.04838	0.914898			3.85762	0.0725746	-0.227047	0.142265	0.129246	-0.1036	0.19643	-0.0300598	0.0829124	-0.104225	0.580029	0.0779343	0.254826			3.85762	0.0725746	-0.108288	0.331882	-0.0345116	0.117363	0.177025	0.0925179	0.152828	0.560738	0.130432	0.172821	0.0944672			3.85762	0.0725746	-0.0152359	-0.00647736
	3.86786	0.0806732	-0.521206	1.33057	1.11932	1.0643	1.2982	0.940483	1.05682	0.723049	0.883045	1.09744	0.958244			3.86786	0.0806732	-0.226723	0.177479	0.0793953	-0.0389175	0.229568	0.0586548	0.0148773	-0.113857	0.527435	0.121971	0.183861			3.86786	0.0806732	-0.083168	0.409534	-0.0279808	0.0889091	0.0950089	0.12944	0.137539	0.635197	0.155312	0.279823	0.127823			3.86786	0.0806732	-0.0032692	-0.0681114
	3.8781	0.0880661	-0.55024	1.31656	1.18565	1.10833	1.41124	0.981743	1.08415	0.759861	0.867847	1.1269	1.005			3.8781	0.0880661	-0.231026	0.199024	0.162426	0.102928	0.151474	-0.0042305	0.0539703	-0.115383	0.509293	0.0454597	0.236504			3.8781	0.0880661	-0.0720291	0.398735	-0.0958252	0.0480461	0.191963	0.0835533	0.0597992	0.541008	0.192863	0.227856	0.206963			3.8781	0.0880661	0.00141907	-0.115906
	3.88834	0.0825577	-0.525669	1.34696	1.21236	1.09789	1.49698	1.01755	1.02005	0.761646	0.860931	1.01156	0.993633			3.88834	0.0825577	-0.22718	0.214542	0.22694	-0.00694656	0.19775	-0.0945663	0.108002	-0.144756	0.424995	0.104969	0.262894			3.88834	0.0825577	-0.0430984	0.364212	-0.103668	0.0803986	0.213024	0.084877	0.164883	0.428688	0.129887	0.231384	0.17691			3.88834	0.0825577	0.0197334	-0.138325
	3.89858	0.100872	-0.512764	1.25531	1.12194	1.11057	1.38995	1.02845	1.03831	0.787991	0.951519	1.06014	1.08721			3.89858	0.100872	-0.218334	0.228207	0.205055	-0.0268555	0.224777	-0.0350189	0.129524	-0.150921	0.38319	0.113354	0.209217			3.89858	0.100872	-0.0543022	0.340752	-0.130524	0.166039	0.185249	0.0628128	0.167744	0.448063	0.0882187	0.227333	0.109413			3.89858	0.100872	-0.00167847	-0.0500641
	3.90882	0.101208	-0.512367	1.25064	1.1266	1.1783	1.4299	1.06393	1.03809	0.762539	0.907101	1.07728	1.0229			3.90882	0.101208	-0.216637	0.235573	0.2383	-0.0400848	0.174553	0.0359688	0.0747108	-0.0389214	0.372654	0.038929	0.249081			3.90882	0.101208	-0.061409	0.384953	-0.0563774	0.0867882	0.262424	0.0918045	0.197952	0.551544	0.104374	0.194733	0.0072403			3.90882	0.101208	-0.0396538	-0.0666313
	3.91906	0.108513	-0.487133	1.28015	1.17561	1.20101	1.43768	0.998489	1.04621	0.798481	0.820221	1.07018	0.921272			3.91906	0.108513	-0.20277	0.173187	0.186337	-0.0751495	0.242477	0.104218	0.097847	-0.0164375	0.497658	0.132507	0.337303			3.91906	0.108513	-0.0523071	0.365723	0.0516624	0.0592117	0.258919	0.0313797	0.19471	0.657345	0.118134	0.27515	0.00205612			3.91906	0.108513	-0.0605392	-0.0735474
	3.9293	0.0894203	-0.4884	1.31423	1.17787	1.07913	1.43132	0.940544	1.04547	0.893398	0.804081	1.10152	0.914352			3.9293	0.0894203	-0.204773	0.284542	0.171112	-0.0864258	0.295097	0.0790634	0.0431061	-0.184402	0.496822	0.180252	0.362045			3.9293	0.0894203	-0.037735	0.406708	0.082859	0.0540619	0.190208	-0.0432968	0.196484	0.615753	0.0572166	0.266743	0.0470047			3.9293	0.0894203	-0.00431442	-0.0366631
	3.93954	0.123455	-0.4963	1.33523	1.22353	1.07793	1.39788	1.044	1.03231	0.897381	0.835217	1.07505	0.981163			3.93954	0.123455	-0.175819	0.313831	0.228489	-0.027977	0.348431	-0.0185928	-0.00959396	-0.164185	0.504196	0.0483475	0.321381			3.93954	0.123455	-0.0167351	0.443161	0.0862541	-1.90735e-05	0.11388	0.0226746	0.154903	0.540722	0.161674	0.205444	0.0272179			3.93954	0.123455	1.90735e-05	0.00363922
	3.94978	0.12355	-0.491264	1.37827	1.20276	1.08439	1.44759	1.09914	0.996235	0.834328	0.887566	1.11292	0.925137			3.94978	0.12355	-0.182762	0.208473	0.214054	-0.0723915	0.24379	0.0301743	0.031414	-0.00213242	0.500549	0.0898666	0.401512			3.94978	0.12355	-0.000450134	0.444607	0.0497704	0.00788116	0.2761	0.113258	0.150375	0.576363	0.124149	0.333015	0.0749512			3.94978	0.12355	0.0260963	0.0332031
	3.96002	0.108742	-0.501564	1.36359	1.17356	1.1099	1.47626	1.10749	0.96114	0.74461	0.874153	1.10452	0.894287			3.96002	0.108742	-0.176498	0.194145	0.228001	-0.0813828	0.212238	-0.0318718	0.0573654	0.00273895	0.521259	0.00558853	0.331772			3.96002	0.108742	-0.0152359	0.437057	-0.067524	0.0557938	0.284424	0.0986443	0.234249	0.628342	0.172596	0.336243	0.0387573			3.96002	0.108742	0.0354424	0.0273857
	3.97026	0.0876808	-0.47794	1.28762	1.16904	1.13718	1.51131	1.15705	0.983597	0.66423	0.87941	1.17488	0.939728			3.97026	0.0876808	-0.162952	0.30098	0.211422	0.0559082	0.235992	-0.0381432	0.0541115	0.0123138	0.498283	-0.049408	0.293533			3.97026	0.0876808	-0.0032692	0.493156	-0.0304985	0.0401764	0.258968	0.119617	0.249714	0.682747	0.230103	0.301697	0.0750694			3.97026	0.0876808	0.0326653	0.0249672
	3.9805	0.0877876	-0.481689	1.21783	1.18388	1.16431	1.47565	1.16833	1.03732	0.598316	0.888672	1.06001	1.07378			3.9805	0.0877876	-0.13987	0.256706	0.221157	0.0655174	0.22176	-0.00173569	0.140404	-0.114658	0.516872	-0.033432	0.30407			3.9805	0.0877876	0.00141907	0.501217	0.0315781	0.0140572	0.202415	0.131252	0.239342	0.558952	0.170177	0.356438	0.0726738			3.9805	0.0877876	0.0174065	0.0432053
	3.99074	0.125519	-0.524784	1.25652	1.05741	1.17599	1.51427	1.02681	1.07638	0.647953	0.86525	1.01326	1.05245			3.99074	0.125519	-0.120098	0.217846	0.171638	-0.0230637	0.230892	-0.0292511	0.164688	-0.23011	0.502361	0.0480576	0.234188			3.99074	0.125519	0.0197334	0.42981	0.0155182	-0.0419273	0.175903	0.0438805	0.266483	0.641693	0.197407	0.347008	0.150661			3.99074	0.125519	0.02071	-0.0275955
	4.00098	0.125038	-0.480259	1.32124	1.13265	1.16145	1.43543	1.05387	0.985802	0.754803	0.898697	1.14715	1.07504			4.00098	0.125038	-0.151878	0.270008	0.143028	-0.0804977	0.268631	-0.0106888	0.186172	-0.173985	0.521461	0.0814056	0.299446			4.00098	0.125038	-0.00167847	0.411179	0.0911903	-0.069725	0.0181084	0.0920334	0.314907	0.649487	0.202911	0.268509	0.152927			4.00098	0.125038	0.00780106	0.0195541
	4.01122	0.140644	-0.446953	1.19205	1.19497	1.15647	1.43718	1.09517	0.966076	0.81937	0.963501	1.17094	1.02463			4.01122	0.140644	-0.144848	0.236988	0.191116	-0.0878792	0.261208	0.0779533	0.173927	-0.186256	0.489918	0.107616	0.351444			4.01122	0.140644	-0.0396538	0.471905	0.0979156	-0.0229073	0.0600548	0.14167	0.29805	0.679005	0.167446	0.29253	0.159126			4.01122	0.140644	0.018177	0.0538979
	4.02146	0.103912	-0.416832	1.25223	1.19636	1.22906	1.41895	1.06536	1.0259	0.860004	0.979977	1.12489	0.957993			4.02146	0.103912	-0.129879	0.161926	0.216343	-0.00932312	0.260994	0.0530624	0.145664	-0.0974045	0.519672	0.0233345	0.342072			4.02146	0.103912	-0.0605392	0.386883	-0.0435982	-0.0068779	0.0667686	0.0879059	0.222282	0.617863	0.204208	0.288811	0.167015			4.02146	0.103912	0.0513802	0.0395699
	4.0317	0.125042	-0.423897	1.2092	1.26773	1.27682	1.40228	1.01844	1.10806	0.911015	0.910763	1.10757	1.04791			4.0317	0.125042	-0.163742	0.238277	0.247707	0.0168076	0.26643	0.014225	0.121346	-0.0551834	0.616531	0.109131	0.323299			4.0317	0.125042	-0.00431442	0.41951	-0.00473404	0.0532265	0.104424	0.113976	0.162365	0.568748	0.30088	0.392796	0.163727			4.0317	0.125042	0.0608025	0.0665092
	4.04194	0.160332	-0.445881	1.26974	1.25402	1.1887	1.52738	1.01853	1.11371	0.840931	0.885536	1.07494	1.06347			4.04194	0.160332	-0.13665	0.297356	0.193047	0.0545044	0.280685	-0.0674591	0.114777	-0.0211029	0.589806	0.0870323	0.311962			4.04194	0.160332	1.90735e-05	0.395931	0.0337791	0.0803719	0.113834	0.177181	0.149563	0.597717	0.326591	0.299191	0.153557			4.04194	0.160332	0.0711212	0.0674629
	4.05218	0.187012	-0.458008	1.25586	1.14715	1.15345	1.52537	1.08607	1.05858	0.843304	0.859024	1.10208	1.07992			4.05218	0.187012	-0.108288	0.264805	0.23222	0.0625305	0.362164	0.126804	0.0738602	-0.0272636	0.585381	0.151749	0.301151			4.05218	0.187012	0.0260963	0.394394	-0.0341797	0.0593529	0.142761	0.199318	0.235455	0.615726	0.25087	0.289536	0.180973			4.05218	0.187012	0.0447655	0.0288315
	4.06242	0.145893	-0.424278	1.22465	1.12845	1.14648	1.49034	1.09668	1.0409	0.815609	0.931122	1.11128	0.999691			4.06242	0.145893	-0.083168	0.229351	0.302174	-0.0167923	0.384544	0.152328	0.1264	0.0458946	0.580437	0.170227	0.323261			4.06242	0.145893	0.0354424	0.347626	-0.0867157	0.0464325	0.187431	0.145088	0.255699	0.579311	0.35915	0.282471	0.272945			4.06242	0.145893	0.0570412	-0.0653343
	4.07266	0.141468	-0.440334	1.26968	1.09997	1.0973	1.54468	1.0074	1.08664	0.82571	0.935822	1.07057	1.00746			4.07266	0.141468	-0.0720291	0.152985	0.336708	0.0304604	0.384899	0.164379	0.240913	-0.0325699	0.562054	0.11235	0.342525			4.07266	0.141468	0.0326653	0.364044	0.0356064	0.177982	0.144478	0.170853	0.215382	0.636986	0.364666	0.314846	0.176697			4.07266	0.141468	0.0596924	0.0208435
	4.0829	0.142597	-0.458363	1.30397	1.20122	1.04581	1.46781	1.06541	1.10255	0.816063	0.909618	1.07499	0.919724			4.0829	0.142597	-0.0430984	0.181698	0.360821	0.071907	0.406071	0.179592	0.124397	-0.00456619	0.617367	0.137482	0.223427			4.0829	0.142597	0.0174065	0.450077	0.0664177	0.151016	0.341213	0.0877724	0.291412	0.694977	0.360447	0.307083	0.145378			4.0829	0.142597	0.0799751	0.040905
	4.09314	0.126144	-0.466469	1.31679	1.15235	1.12057	1.459	1.06638	1.09247	0.806232	0.898415	1.08703	0.978462			4.09314	0.126144	-0.0543022	0.23682	0.307884	0.0528259	0.384003	0.148857	0.142708	0.0492096	0.51897	0.0803413	0.275234			4.09314	0.126144	0.02071	0.391941	0.0542259	0.130062	0.334641	0.117004	0.322216	0.706852	0.328583	0.293205	0.084198			4.09314	0.126144	0.0752945	0.082531
	4.10338	0.138931	-0.451561	1.22867	1.07009	1.13123	1.39336	1.16448	1.01567	0.873158	0.890377	1.104	1.01017			4.10338	0.138931	-0.061409	0.312107	0.384129	0.0465393	0.295898	0.158936	0.120544	0.0428658	0.543266	0.158257	0.341026			4.10338	0.138931	0.00780106	0.303112	-0.0168839	0.1287	0.270069	0.148735	0.282902	0.64645	0.259712	0.348938	0.143398			4.10338	0.138931	0.0763168	0.0163383
	4.11362	0.135132	-0.431362	1.25245	1.24578	1.07839	1.41483	1.18195	1.00671	0.963493	0.825027	1.12661	1.09544			4.11362	0.135132	-0.0523071	0.336838	0.350689	0.0968475	0.371239	0.156704	0.211071	0.0205994	0.602997	0.105637	0.307003			4.11362	0.135132	0.018177	0.309708	-0.0458603	0.0371246	0.182434	0.167427	0.304321	0.69294	0.189713	0.331902	0.179821			4.11362	0.135132	0.0837021	0.0673904
	4.12386	0.152382	-0.419067	1.26911	1.26315	1.12548	1.3853	1.0652	0.953106	0.879734	0.839478	1.13716	1.11771			4.12386	0.152382	-0.037735	0.362968	0.359104	0.162235	0.37735	0.162247	0.173393	-0.0537415	0.527313	0.17683	0.228622			4.12386	0.152382	0.0513802	0.470211	0.0685158	0.164131	0.285255	0.0899429	0.334957	0.736488	0.293663	0.375286	0.150337			4.12386	0.152382	0.0807114	0.0349922
	4.1341	0.156036	-0.421089	1.21849	1.17444	1.18722	1.37049	1.04076	0.990654	0.80442	0.995972	1.23281	1.06269			4.1341	0.156036	-0.0167351	0.309219	0.39127	0.056839	0.356052	0.147156	0.175404	0.0147934	0.479591	0.112099	0.249344			4.1341	0.156036	0.0608025	0.422218	0.124237	0.135494	0.347755	0.0778084	0.245754	0.775108	0.343113	0.424503	0.106087			4.1341	0.156036	0.0514946	-0.0214996
	4.14434	0.132236	-0.415611	1.24399	1.13184	1.16115	1.40538	0.998013	0.986435	0.833038	0.922001	1.2125	1.00172			4.14434	0.132236	-0.000450134	0.257961	0.347256	0.110558	0.447723	0.15284	0.25325	0.0374222	0.48584	0.153584	0.372772			4.14434	0.132236	0.0711212	0.389126	0.181553	0.142841	0.36179	0.245121	0.267677	0.75103	0.384327	0.430862	0.0810204			4.14434	0.132236	0.0379448	-0.0112839
	4.15458	0.132549	-0.434761	1.27417	1.06612	1.12364	1.40416	0.973122	1.07768	0.826855	0.960949	1.19825	1.01526			4.15458	0.132549	-0.0152359	0.282661	0.362221	0.0596771	0.446507	0.171391	0.17902	0.0344887	0.608437	0.10659	0.390137			4.15458	0.132549	0.0447655	0.556789	0.0475044	0.145092	0.35038	0.201347	0.266769	0.612022	0.350765	0.346779	0.0918045			4.15458	0.132549	0.0366898	0.0153847
	4.16482	0.16666	-0.412575	1.28792	1.16795	1.13327	1.36885	0.939018	1.09339	0.820118	0.991585	1.14408	1.03319			4.16482	0.16666	-0.0032692	0.247097	0.295235	-0.038887	0.398087	0.192528	0.142876	0.133575	0.606209	0.0453873	0.302734			4.16482	0.16666	0.0570412	0.523079	0.0494919	0.152695	0.276627	0.124252	0.221939	0.64603	0.335472	0.352898	0.161865			4.16482	0.16666	0.0458069	0.0807915
	4.17506	0.167267	-0.382256	1.36482	1.16338	1.15524	1.34767	1.00456	1.00956	0.892513	1.02605	1.13102	0.961365			4.17506	0.167267	0.00141907	0.25959	0.352764	-0.0142097	0.404522	0.133171	0.217072	0.12059	0.584633	0.133904	0.360836			4.17506	0.167267	0.0596924	0.444996	0.00294113	0.224903	0.345577	0.152588	0.294903	0.68177	0.29599	0.34436	0.143867			4.17506	0.167267	0.0644112	-0.0205383
	4.1853	0.155003	-0.371788	1.4265	1.17251	1.16384	1.36749	1.01615	1.04052	0.837212	0.914314	1.10446	0.97834			4.1853	0.155003	0.0197334	0.269047	0.346771	0.124638	0.495956	0.0923309	0.196194	0.0513191	0.607113	0.172707	0.334251			4.1853	0.155003	0.0799751	0.450424	0.0348206	0.207165	0.265923	0.222145	0.234322	0.758183	0.373764	0.335194	0.0538177			4.1853	0.155003	0.0479088	0.0672264
	4.19554	0.141876	-0.378784	1.42213	1.08641	1.19902	1.42585	1.02029	1.05169	0.818699	0.949341	1.19655	0.977303			4.19554	0.141876	-0.00167847	0.299572	0.364422	0.148106	0.499649	0.129547	0.106312	0.106785	0.603523	0.209076	0.291733			4.19554	0.141876	0.0752945	0.510921	0.131413	0.185207	0.280212	0.206638	0.276283	0.76004	0.403877	0.334419	0.140434			4.19554	0.141876	0.062706	0.107185
	4.20578	0.132198	-0.388813	1.34502	1.17902	1.13198	1.44977	1.01609	1.07997	0.82745	1.01551	1.25649	1.03116			4.20578	0.132198	-0.0396538	0.31712	0.393311	0.0630379	0.492081	0.0756645	0.231354	0.128448	0.528339	0.210793	0.297348			4.20578	0.132198	0.0763168	0.49453	0.253174	0.161087	0.332153	0.195728	0.250153	0.654079	0.349159	0.3088	0.269974			4.20578	0.132198	0.0754013	0.128822
	4.21602	0.189301	-0.412498	1.29918	1.251	1.18653	1.38699	1.09742	1.12482	0.875065	0.96722	1.17582	1.09612			4.21602	0.189301	-0.0605392	0.264969	0.40995	0.0379105	0.539421	0.152031	0.314545	0.142635	0.56675	0.175747	0.277641			4.21602	0.189301	0.0837021	0.568489	0.154171	0.0628738	0.288555	0.294376	0.365379	0.625336	0.354355	0.286831	0.274235			4.21602	0.189301	0.0965462	0.091259
	4.22626	0.187534	-0.409355	1.28755	1.15102	1.19311	1.47401	1.07156	1.04133	0.985054	0.923615	1.23349	1.13604			4.22626	0.187534	-0.00431442	0.285126	0.437523	0.0530853	0.532936	0.141792	0.335373	0.0849609	0.600067	0.152264	0.341431			4.22626	0.187534	0.0807114	0.549057	0.0856972	0.101604	0.32346	0.22086	0.334888	0.684525	0.288322	0.329746	0.21954			4.22626	0.187534	0.119415	0.0783501
	4.2365	0.190823	-0.347694	1.24344	1.12517	1.15554	1.50876	1.01379	1.05945	1.01714	0.937752	1.19859	1.16408			4.2365	0.190823	1.90735e-05	0.284733	0.381039	0.0434418	0.584503	0.221973	0.311008	0.0563049	0.70837	0.188957	0.353088			4.2365	0.190823	0.0514946	0.628784	0.138828	0.135162	0.313889	0.243294	0.428181	0.678097	0.302986	0.324333	0.283272			4.2365	0.190823	0.141304	0.158054
	4.24674	0.182766	-0.35754	1.28922	1.15086	1.17421	1.44691	1.1205	1.07184	0.903793	1.02826	1.23296	1.12264			4.24674	0.182766	0.0260963	0.213017	0.435032	0.0956459	0.556274	0.204243	0.218048	0.117371	0.589264	0.18092	0.445396			4.24674	0.182766	0.0379448	0.586308	0.142403	0.0675087	0.28931	0.152328	0.413853	0.704433	0.265663	0.313091	0.25087			4.24674	0.182766	0.104809	0.123207
	4.25698	0.160095	-0.364773	1.39328	1.18403	1.13261	1.38523	1.13172	1.12195	0.92271	0.984539	1.24339	1.01577			4.25698	0.160095	0.0354424	0.309673	0.402809	0.0438385	0.547882	0.203472	0.24781	0.140785	0.679817	0.159367	0.51569			4.25698	0.160095	0.0366898	0.495853	0.18594	0.17997	0.191486	0.178253	0.32143	0.757027	0.285797	0.266853	0.153831			4.25698	0.160095	0.117962	0.0625305
	4.26722	0.155762	-0.374554	1.33363	1.19364	1.22437	1.33831	1.10864	1.11015	0.985531	1.05005	1.20388	1.02277			4.26722	0.155762	0.0326653	0.322033	0.305954	0.0428696	0.570091	0.244514	0.253166	0.113953	0.685173	0.130173	0.529972			4.26722	0.155762	0.0458069	0.46693	0.13332	0.157681	0.259388	0.176941	0.369732	0.734722	0.349194	0.254002	0.155533			4.26722	0.155762	0.122932	0.118835
	4.27746	0.187057	-0.388012	1.24603	1.09374	1.27972	1.39928	1.15527	0.98468	0.957581	1.00967	1.20068	1.03902			4.27746	0.187057	0.0174065	0.373211	0.311565	0.0197411	0.494152	0.234165	0.329567	0.125542	0.589233	0.111183	0.510983			4.27746	0.187057	0.0644112	0.446331	0.0960312	0.107647	0.218964	0.201523	0.31686	0.662384	0.387615	0.282063	0.113636			4.27746	0.187057	0.10619	0.0996513
	4.2877	0.213837	-0.348656	1.35826	1.12089	1.28197	1.37323	1.05214	0.994305	0.968174	0.957123	1.24088	1.02546			4.2877	0.213837	0.02071	0.332062	0.318741	-0.015007	0.497993	0.171738	0.252762	0.130436	0.595478	0.113972	0.496094			4.2877	0.213837	0.0479088	0.542191	0.0894508	0.0568199	0.240051	0.134239	0.318386	0.772907	0.363274	0.256584	0.106411			4.2877	0.213837	0.121689	0.100414
	4.29794	0.191006	-0.33197	1.33029	1.1242	1.15985	1.41808	0.965252	1.0286	0.940174	0.955547	1.25578	0.995197			4.29794	0.191006	0.00780106	0.271416	0.37941	0.0138435	0.426743	0.21954	0.250507	0.199448	0.610764	0.14275	0.451664			4.29794	0.191006	0.062706	0.474964	0.113388	0.110008	0.267376	0.182068	0.357441	0.676167	0.379463	0.323414	0.0237045			4.29794	0.191006	0.111652	0.0340996
	4.30818	0.157673	-0.351295	1.33051	1.17204	1.15671	1.34484	1.04631	1.11111	1.04503	0.968327	1.33179	1.03538			4.30818	0.157673	0.018177	0.319782	0.360477	-0.0290604	0.501808	0.288048	0.318993	0.151409	0.53846	0.243076	0.524918			4.30818	0.157673	0.0754013	0.449352	0.0844917	0.0916862	0.185131	0.213467	0.288933	0.654327	0.350662	0.4095	0.0908203			4.30818	0.157673	0.0905914	0.0521011
	4.31842	0.161522	-0.33839	1.32867	1.12273	1.25348	1.41439	1.03768	1.19256	1.02884	0.943317	1.33194	1.08116			4.31842	0.161522	0.0513802	0.333214	0.352837	0.0139847	0.454098	0.263409	0.266029	0.0999908	0.601402	0.250381	0.515869			4.31842	0.161522	0.0965462	0.391781	0.0978355	0.0957756	0.213074	0.298012	0.326653	0.709297	0.381393	0.402416	0.101723			4.31842	0.161522	0.090229	0.0496292
	4.32866	0.154625	-0.324699	1.31768	1.11915	1.20565	1.37547	1.10094	1.12609	0.965782	0.890903	1.23701	1.02264			4.32866	0.154625	0.0608025	0.272419	0.312843	0.0487823	0.433182	0.344208	0.168121	0.0485878	0.633553	0.230045	0.526527			4.32866	0.154625	0.119415	0.441849	0.176163	0.0520515	0.184441	0.286415	0.347046	0.57106	0.358612	0.415684	0.125015			4.32866	0.154625	0.109135	-0.0432587
	4.3389	0.14241	-0.317951	1.33713	1.10284	1.2006	1.34299	1.06873	1.10952	1.04063	0.931755	1.28022	1.02131			4.3389	0.14241	0.0711212	0.325291	0.30283	-0.00769806	0.535938	0.248901	0.254368	0.0921707	0.555069	0.218521	0.548569			4.3389	0.14241	0.141304	0.43433	0.26997	0.0252838	0.207199	0.175083	0.283329	0.604607	0.327805	0.43148	0.0515976			4.3389	0.14241	0.135914	0.0512772
	4.34914	0.17894	-0.322197	1.29495	1.17659	1.17408	1.4017	1.07843	1.21075	0.956982	0.926414	1.22799	1.0499			4.34914	0.17894	0.0447655	0.330448	0.32045	0.0188599	0.517303	0.201382	0.321117	0.113297	0.450935	0.179634	0.544373			4.34914	0.17894	0.104809	0.348961	0.20475	0.111271	0.163757	0.168358	0.218822	0.634743	0.365669	0.344444	0.0789566			4.34914	0.17894	0.132214	0.143593
	4.35938	0.183212	-0.319561	1.22681	1.21734	1.15601	1.33941	1.05476	1.17204	0.91391	0.956787	1.21623	1.04253			4.35938	0.183212	0.0570412	0.39077	0.309147	0.0276718	0.539738	0.194111	0.325966	0.108528	0.50024	0.299137	0.417191			4.35938	0.183212	0.117962	0.438511	0.161991	0.225571	0.231232	0.167618	0.169415	0.655415	0.387386	0.277519	0.0672607			4.35938	0.183212	0.127182	0.0470695
	4.36962	0.156044	-0.300072	1.29412	1.2578	1.07784	1.29845	0.991207	1.10456	1.05663	1.00628	1.24771	1.00111			4.36962	0.156044	0.0596924	0.353687	0.349918	0.104546	0.495964	0.183979	0.270153	0.0767937	0.567177	0.27005	0.437218			4.36962	0.156044	0.122932	0.49213	0.174732	0.165333	0.326859	0.251041	0.187592	0.718262	0.363853	0.316002	0.0122604			4.36962	0.156044	0.11245	0.0412521
	4.37986	0.150871	-0.301456	1.40541	1.32684	1.11636	1.33342	0.94437	1.09878	1.08603	1.02173	1.16886	0.976124			4.37986	0.150871	0.0799751	0.234406	0.349567	0.188328	0.569923	0.156334	0.253868	0.0268097	0.485245	0.184975	0.444832			4.37986	0.150871	0.10619	0.459888	0.163612	0.162804	0.309132	0.162399	0.272659	0.652458	0.372955	0.42218	0.0922737			4.37986	0.150871	0.0913048	0.0934982
	4.3901	0.137909	-0.293694	1.36493	1.25959	1.07409	1.36181	0.862949	1.15267	1.06011	1.06408	1.11606	0.997948			4.3901	0.137909	0.0752945	0.243877	0.296211	0.137299	0.567982	0.17646	0.312019	0.102257	0.480595	0.14883	0.500504			4.3901	0.137909	0.121689	0.59668	0.15044	0.145973	0.355148	0.143085	0.19944	0.540161	0.381355	0.374199	0.122528			4.3901	0.137909	0.140438	0.103249
	4.40034	0.173153	-0.271252	1.42072	1.19807	1.06998	1.32143	0.940456	1.13573	1.01583	1.02934	1.07539	0.935211			4.40034	0.173153	0.0763168	0.300663	0.31971	0.0679626	0.519188	0.174488	0.282303	0.118149	0.497284	0.127739	0.486294			4.40034	0.173153	0.111652	0.551548	0.131927	0.0650063	0.33741	0.0992088	0.241821	0.589214	0.275772	0.37674	0.0844612			4.40034	0.173153	0.162727	0.0831528
	4.41058	0.173641	-0.269463	1.34475	1.14534	1.00314	1.29989	1.00822	1.19423	0.942043	1.02149	0.758038	0.963188			4.41058	0.173641	0.0837021	0.381271	0.360096	-0.0205994	0.495296	0.229889	0.205898	0.16069	0.52586	0.127312	0.497261			4.41058	0.173641	0.0905914	0.560932	0.222775	0.105728	0.355766	0.128853	0.327473	0.669777	0.302765	0.336815	0.098568			4.41058	0.173641	0.158531	0.0509071
	4.42082	0.163513	-0.290688	1.27013	1.21149	1.03907	1.33135	0.988049	1.16156	0.927216	1.07077	0.794601	0.948383			4.42082	0.163513	0.0807114	0.348118	0.338188	0.080101	0.57555	0.200012	0.200142	0.176331	0.472847	0.137108	0.420883			4.42082	0.163513	0.090229	0.388744	0.229393	0.163177	0.379814	0.118027	0.335091	0.710678	0.410202	0.358978	0.138073			4.42082	0.163513	0.152534	0.00887299
	4.43106	0.176754	-0.268726	1.30867	1.11772	1.05438	1.34837	1.05994	1.19202	0.972481	1.04739	1.11309	0.920166			4.43106	0.176754	0.0514946	-0.0660744	0.347519	0.0602951	0.519569	0.113834	0.236702	0.177322	0.507561	0.16378	0.327244			4.43106	0.176754	0.109135	0.38419	0.207993	0.163185	0.321148	0.175476	0.330475	0.7262	0.323372	0.37326	0.073185			4.43106	0.176754	0.150612	0.0595856
	4.4413	0.201633	-0.26086	1.25171	1.0467	1.07291	1.30433	1.04989	1.11258	0.946018	0.932697	1.16837	1.00152			4.4413	0.201633	0.0379448	-0.140713	0.353336	0.0864525	0.45409	0.107437	0.230812	0.179504	0.543655	0.247581	0.374142			4.4413	0.201633	0.135914	0.371849	0.165363	0.108723	0.311436	0.222088	0.331276	0.787235	0.272923	0.38023	0.164848			4.4413	0.201633	0.146496	0.0696487
	4.45154	0.174335	-0.256882	1.16072	1.09684	1.03579	1.24641	1.04562	1.07655	0.964947	0.875988	1.12841	0.906254			4.45154	0.174335	0.0366898	0.217152	0.301517	0.0745316	0.487621	0.165642	0.18642	0.156631	0.563351	0.219116	0.38308			4.45154	0.174335	0.132214	0.514702	0.0985336	0.0614204	0.326084	0.205864	0.220795	0.653938	0.390011	0.359322	0.10379			4.45154	0.174335	0.143906	0.00613403
	4.46178	0.176365	-0.227047	1.12398	1.09483	1.01006	1.23956	0.957352	1.07199	0.993496	0.960148	1.07074	0.933376			4.46178	0.176365	0.0458069	0.178947	0.322166	0.157761	0.521465	0.231354	0.108852	0.138081	0.56823	0.127403	0.35527			4.46178	0.176365	0.127182	0.604954	0.161144	0.0956802	0.384422	0.124195	0.20837	0.60778	0.434227	0.395504	0.00561523			4.46178	0.176365	0.144447	0.0335388
	4.47202	0.191311	-0.226723	1.20098	1.16677	0.996925	1.21297	0.877579	1.13372	0.984768	0.989204	1.08899	0.891518			4.47202	0.191311	0.0644112	0.207928	0.13739	0.113918	0.514362	0.212158	0.107948	0.141682	0.607002	0.10508	0.315529			4.47202	0.191311	0.11245	0.50787	0.167572	0.189999	0.407803	0.109825	0.271122	0.584591	0.388977	0.44593	-0.000541687			4.47202	0.191311	0.155598	0.0260735
	4.48226	0.168873	-0.231026	1.19027	1.06116	0.989452	1.1633	0.836594	1.20217	0.913521	0.944046	1.18979	0.942841			4.48226	0.168873	0.0479088	0.34148	0.198353	0.112965	0.584053	0.184788	0.136971	0.236893	0.622787	0.0264816	0.294689			4.48226	0.168873	0.0913048	0.440147	0.186321	0.199345	0.265644	0.109566	0.209095	0.483025	0.430637	0.316193	0.0821266			4.48226	0.168873	0.174458	0.0727234
	4.4925	0.14782	-0.22718	1.2015	1.01721	1.06518	1.17458	0.982174	1.09959	0.898056	0.959091	1.25459	0.891319			4.4925	0.14782	0.062706	0.240101	0.221695	0.0212936	0.495083	0.135437	0.177216	0.161469	0.544109	-0.0658646	0.358955			4.4925	0.14782	0.140438	0.422611	0.143085	0.18288	0.282516	0.155285	0.139095	0.525414	0.393337	0.347771	0.0400352			4.4925	0.14782	0.147606	0.0769997
	4.50274	0.175983	-0.218334	1.12851	1.00511	1.09995	1.23183	0.961369	0.976311	0.887493	0.876598	1.19999	0.917267			4.50274	0.175983	0.0754013	0.207012	0.141811	-0.0206566	0.513073	0.101715	0.202145	0.207779	0.557915	-0.139847	0.413265			4.50274	0.175983	0.162727	0.428547	0.168701	0.111855	0.364483	0.0836487	0.169331	0.511124	0.355461	0.4249	0.0609283			4.50274	0.175983	0.178047	0.0925446
	4.51298	0.160503	-0.216637	1.13138	0.966667	1.06504	1.30994	0.841221	1.11764	0.934025	0.863602	1.18247	0.934242			4.51298	0.160503	0.0965462	0.297539	0.217129	0.00784302	0.541969	0.147835	0.104633	0.168869	0.438156	-0.0317879	0.43222			4.51298	0.160503	0.158531	0.459183	0.139709	0.138645	0.407112	0.0679855	0.240963	0.468697	0.322754	0.323357	0.0250969			4.51298	0.160503	0.204487	0.140755
	4.52322	0.195557	-0.20277	1.08289	1.08852	1.08479	1.2958	0.754841	1.13529	0.877743	0.83194	1.11191	0.943207			4.52322	0.195557	0.119415	0.347202	0.293255	-0.0431747	0.508018	0.0763321	0.05616	0.141823	0.586681	0.0195198	0.382771			4.52322	0.195557	0.152534	0.44817	0.136909	0.111401	0.35355	0.0490532	0.276569	0.506317	0.355026	0.288929	0.0924263			4.52322	0.195557	0.207664	0.195129
	4.53346	0.197922	-0.204773	1.13617	1.14149	0.995159	1.23531	0.725739	1.06042	0.872952	0.83181	1.20783	0.833035			4.53346	0.197922	0.141304	0.387573	0.369133	-0.0267487	0.575169	0.110847	0.0488739	0.0432129	0.516705	0.00141525	0.380768			4.53346	0.197922	0.150612	0.414146	0.138493	0.128853	0.369251	0.0640869	0.238842	0.61747	0.297791	0.35545	0.172771			4.53346	0.197922	0.216511	0.141815
	4.5437	0.182281	-0.175819	1.05201	1.10673	0.952484	1.21634	0.752682	1.12344	0.973866	0.845325	1.1512	0.80011			4.5437	0.182281	0.104809	0.299065	0.248734	0.00989532	0.636932	0.0221558	0.0914803	0.0793839	0.593178	0.0336609	0.450981			4.5437	0.182281	0.146496	0.490414	0.126476	0.143017	0.338242	0.0559578	0.185413	0.666023	0.260181	0.384045	0.050869			4.5437	0.182281	0.262829	0.0781708
	4.55394	0.167931	-0.182762	1.10342	1.03988	1.02133	1.19101	0.81102	1.12563	1.08525	0.865925	1.08347	0.901272			4.55394	0.167931	0.117962	0.269535	0.163166	-0.0502815	0.495716	0.0144882	0.172138	0.0936623	0.588421	0.0168037	0.48838			4.55394	0.167931	0.143906	0.504387	0.222858	0.152973	0.184669	0.151516	0.138191	0.647079	0.214645	0.308014	0.00188828			4.55394	0.167931	0.272923	0.176994
	4.56418	0.133343	-0.176498	1.12763	1.08086	1.04706	1.21104	0.887806	1.15214	1.02764	0.845947	1.11592	0.843086			4.56418	0.133343	0.122932	0.293423	0.153389	-0.0561943	0.477676	0.0381393	0.0956688	0.144302	0.563755	0.0699844	0.464371			4.56418	0.133343	0.144447	0.433495	0.219666	0.150135	0.2005	0.100361	0.0998306	0.623203	0.229069	0.342693	0.0705528			4.56418	0.133343	0.276291	0.0936661
	4.57442	0.147278	-0.162952	1.14137	1.04294	0.939312	1.2148	0.884026	1.13102	0.964375	0.83149	1.03469	0.735466			4.57442	0.147278	0.10619	0.302505	0.248695	-0.053833	0.493786	0.0586548	0.100006	0.087738	0.600986	0.0812836	0.478615			4.57442	0.147278	0.155598	0.470737	0.246571	0.220905	0.316952	0.148453	0.0942726	0.631821	0.267941	0.345779	0.0492401			4.57442	0.147278	0.274204	0.0882072
	4.58466	0.127171	-0.13987	1.08674	0.998177	0.92263	1.22031	0.946384	1.07584	0.848896	0.768166	1.08158	0.863426			4.58466	0.127171	0.121689	0.268833	0.192158	-0.0376205	0.482353	0.027504	0.0770798	0.0860901	0.505749	0.0244713	0.494732			4.58466	0.127171	0.174458	0.450043	0.262783	0.141682	0.315414	0.2313	0.140327	0.567177	0.369576	0.329208	-0.0302162			4.58466	0.127171	0.273243	0.094429
	4.5949	0.153301	-0.120098	1.08574	0.930752	1.02602	1.20848	0.826412	1.09085	0.929504	0.776558	1.12587	0.930168			4.5949	0.153301	0.111652	0.283649	0.222958	-0.00360107	0.492317	0.0297356	0.0614548	0.0410309	0.615421	0.0222054	0.434986			4.5949	0.153301	0.147606	0.416981	0.149784	0.0984535	0.253593	0.203548	0.164249	0.563408	0.39082	0.310722	0.0561867			4.5949	0.153301	0.266445	0.230865
	4.60514	0.148293	-0.151878	1.06801	1.01499	1.03506	1.11562	0.760799	1.05306	0.848633	0.847733	1.20368	0.889698			4.60514	0.148293	0.0905914	0.369167	0.320267	-0.0200348	0.588367	0.123768	0.143551	-0.0779877	0.543991	-0.0336571	0.407784			4.60514	0.148293	0.178047	0.499069	0.137363	0.158241	0.270973	0.26685	0.129551	0.56279	0.33321	0.354733	-0.0426941			4.60514	0.148293	0.312431	0.256672
	4.61538	0.141647	-0.144848	0.968807	1.12862	0.918388	1.10168	0.832256	1.09492	0.872665	0.804653	1.15377	0.893703			4.61538	0.141647	0.090229	0.386074	0.302505	0.0318909	0.588558	0.10318	0.098896	-0.0737762	0.462845	0.0298119	0.374535			4.61538	0.141647	0.204487	0.422657	0.19463	0.154888	0.318501	0.18581	0.169056	0.540768	0.337845	0.408028	-0.116714			4.61538	0.141647	0.357338	0.183731
	4.62562	0.156509	-0.129879	0.934734	1.04169	0.852623	1.09147	0.81691	1.12408	0.900906	0.741684	1.15298	0.917664			4.62562	0.156509	0.109135	0.199986	0.324619	0.000621796	0.567181	0.059227	0.069252	0.0108833	0.487617	0.00497818	0.385586			4.62562	0.156509	0.207664	0.441792	0.133465	0.144245	0.323547	0.254501	0.232174	0.598362	0.294453	0.314522	-0.0898552			4.62562	0.156509	0.341438	0.174492
	4.63586	0.168884	-0.163742	0.930935	1.02975	0.860691	1.09618	0.798908	1.14883	0.878208	0.771767	1.13035	0.853935			4.63586	0.168884	0.135914	0.228882	0.245335	0.000732422	0.673172	0.00701523	0.131821	-0.0944252	0.536186	-0.0664062	0.39138			4.63586	0.168884	0.216511	0.448517	0.182354	0.122917	0.339569	0.236832	0.148479	0.631081	0.30088	0.330662	-0.0319443			4.63586	0.168884	0.341866	0.161449
	4.6461	0.152439	-0.13665	0.977596	0.964321	0.804211	1.1232	0.7855	1.03968	0.950714	0.822723	1.11549	0.882523			4.6461	0.152439	0.132214	0.339081	0.127888	-0.0823479	0.656231	-0.00892639	0.115124	-0.0816612	0.522198	-0.00991058	0.369324			4.6461	0.152439	0.262829	0.531612	0.171299	0.0756035	0.261986	0.3209	0.202709	0.585869	0.362114	0.39064	-0.0418396			4.6461	0.152439	0.329414	0.272568
	4.65634	0.108429	-0.108288	0.964291	0.866673	0.865021	1.11712	0.745934	1.05817	0.906017	0.844818	1.08578	0.806309			4.65634	0.108429	0.127182	0.328373	0.173939	0.00855255	0.594669	0.0597038	0.159454	-0.0209198	0.399452	0.0503006	0.290527			4.65634	0.108429	0.272923	0.538971	0.213158	0.161079	0.311588	0.346863	0.209541	0.582886	0.309868	0.327896	-0.0053978			4.65634	0.108429	0.335712	0.259739
	4.66658	0.11586	-0.083168	0.945679	0.934574	0.807274	1.06534	0.734417	1.07479	0.901932	0.684692	1.09066	0.768009			4.66658	0.11586	0.11245	0.295689	0.254883	-0.0650024	0.571068	0.141609	0.243298	0.0278854	0.396591	0.0420418	0.342159			4.66658	0.11586	0.276291	0.514568	0.22604	0.153339	0.376389	0.293671	0.176281	0.511612	0.416534	0.443886	-0.0726089			4.66658	0.11586	0.344528	0.286705
	4.67682	0.150249	-0.0720291	0.954681	0.89769	0.830284	1.14734	0.774677	1.08775	1.00592	0.629025	1.18202	0.767796			4.67682	0.150249	0.0913048	0.34795	0.178146	-0.112995	0.578091	0.0906982	0.188923	0.0294342	0.41478	0.0849686	0.372295			4.67682	0.150249	0.274204	0.658085	0.199688	0.182106	0.355328	0.278332	0.224037	0.463951	0.382645	0.538944	-0.0316963			4.67682	0.150249	0.35714	0.255257
	4.68706	0.135258	-0.0430984	0.951046	0.874485	0.861168	1.06824	0.779217	1.07265	1.07479	0.776604	1.14373	0.764385			4.68706	0.135258	0.140438	0.251343	0.147152	-0.0861168	0.592979	0.0485687	0.108383	0.0587921	0.454514	0.134678	0.32188			4.68706	0.135258	0.273243	0.668823	0.25066	0.150787	0.349628	0.226437	0.26963	0.509289	0.365395	0.460148	-0.0481567			4.68706	0.135258	0.374901	0.2183
	4.6973	0.116482	-0.0543022	0.959904	1.00933	0.854828	1.12738	0.798767	0.953842	0.991291	0.814236	1.07902	0.790527			4.6973	0.116482	0.162727	0.218201	0.177334	-0.0639992	0.583454	0.0719681	0.135696	-0.0299225	0.491489	0.0593262	0.321854			4.6973	0.116482	0.266445	0.663448	0.253029	0.204136	0.355782	0.240898	0.183132	0.501335	0.30381	0.385284	0.024395			4.6973	0.116482	0.375511	0.209599
	4.70754	0.0888443	-0.061409	0.987186	0.987518	0.824108	1.17339	0.727909	0.921288	0.936932	0.791252	1.11339	0.831356			4.70754	0.0888443	0.158531	0.385475	0.184933	-0.0987396	0.618702	0.183254	0.15464	-0.0975151	0.474579	0.0062561	0.299133			4.70754	0.0888443	0.312431	0.601509	0.199314	0.132324	0.440468	0.329399	0.319603	0.563457	0.198727	0.37701	0.0596313			4.70754	0.0888443	0.381279	0.218826
	4.71778	0.0778427	-0.0523071	0.967018	1.06902	0.80072	1.05312	0.730221	1.01052	0.937626	0.713219	1.05884	0.866978			4.71778	0.0778427	0.152534	0.441551	0.167767	-0.162434	0.625443	0.220982	0.174488	-0.111176	0.480835	0.00983047	0.322834			4.71778	0.0778427	0.357338	0.715092	0.161469	0.139797	0.330254	0.305798	0.328701	0.603653	0.388699	0.343956	0.0873222			4.71778	0.0778427	0.378075	0.249748
	4.72802	0.0726814	-0.037735	1.00764	1.0028	0.746384	1.04064	0.767597	0.923286	1.0513	0.771057	1.02301	0.753654			4.72802	0.0726814	0.150612	0.487782	0.139595	-0.131676	0.728683	0.160629	0.175522	-0.0666504	0.546207	-0.00265121	0.298515			4.72802	0.0726814	0.341438	0.768734	0.205765	0.198032	0.40704	0.277138	0.308849	0.617363	0.38932	0.454353	0.067524			4.72802	0.0726814	0.374916	0.201885
	4.73827	0.0832367	-0.0167351	1.1177	0.999424	0.783443	1.01184	0.762016	0.822796	0.929302	0.831429	0.964092	0.744011			4.73827	0.0832367	0.146496	0.375916	0.163055	-0.0824051	0.673538	0.164833	0.135651	-0.0200882	0.505714	-0.0747032	0.366646			4.73827	0.0832367	0.341866	0.803005	0.361938	0.188282	0.447189	0.341797	0.330349	0.614609	0.382465	0.484482	0.0691223			4.73827	0.0832367	0.368095	0.23542
	4.74851	0.062027	-0.000450134	1.05465	0.938881	0.799034	1.02188	0.658566	0.91058	0.860378	0.827946	0.983509	0.756088			4.74851	0.062027	0.143906	0.305931	0.133312	-0.141151	0.684521	0.15052	0.149559	-0.0783005	0.478043	-0.00377274	0.394905			4.74851	0.062027	0.329414	0.776653	0.319206	0.310909	0.534081	0.415337	0.378803	0.610733	0.426289	0.42981	0.18684			4.74851	0.062027	0.365273	0.305191
	4.75875	0.0702591	-0.0152359	1.04731	0.981209	0.753536	1.02567	0.702648	0.901249	0.956699	0.806789	1.01833	0.823799			4.75875	0.0702591	0.144447	0.318432	0.216331	-0.173519	0.698288	0.207119	0.200382	-0.0194168	0.402084	0.0417633	0.34565			4.75875	0.0702591	0.335712	1.09766	0.368534	0.300373	0.577606	0.450386	0.323101	0.646641	0.436169	0.475956	0.133209			4.75875	0.0702591	0.379059	0.285046
	4.76898	0.074913	-0.0032692	1.03997	0.923656	0.798717	0.971161	0.670704	0.877693	0.933239	0.877846	0.956329	0.813747			4.76898	0.074913	0.155598	0.275757	0.20155	-0.0897141	0.714619	0.114422	0.191952	-0.0260925	0.420624	0.100105	0.299229			4.76898	0.074913	0.344528	1.12815	0.46302	0.291996	0.536488	0.47493	0.357433	0.730324	0.526432	0.414967	0.175648			4.76898	0.074913	0.398739	0.312271
	4.77922	0.0782623	0.00141907	1.08227	0.89035	0.781418	0.954361	0.717968	0.968063	0.986629	0.887001	0.964687	0.730015			4.77922	0.0782623	0.174458	0.284042	0.191357	-0.0207901	0.656563	0.0958595	0.100891	0.051178	0.494328	0.160156	0.394562			4.77922	0.0782623	0.35714	0.912312	0.42252	0.317005	0.476685	0.439705	0.40007	0.733402	0.528927	0.421761	0.271549			4.77922	0.0782623	0.38443	0.36438
	4.78946	0.07127	0.0197334	1.05979	0.964546	0.810455	1.00543	0.732723	0.926212	0.841423	0.849358	0.931393	0.760689			4.78946	0.07127	0.147606	0.368809	0.248779	-0.124836	0.62928	0.0680351	0.14801	0.0910492	0.456753	0.062294	0.409019			4.78946	0.07127	0.374901	0.796543	0.466454	0.399044	0.50082	0.449265	0.412197	0.810684	0.471169	0.507919	0.301483			4.78946	0.07127	0.369316	0.353844
	4.79971	0.0351105	-0.00167847	0.989849	0.90226	0.87793	1.00026	0.72871	0.972618	0.825615	0.73687	0.940189	0.758507			4.79971	0.0351105	0.178047	0.339069	0.203083	-0.131805	0.755806	0.0838089	0.181221	0.108135	0.405922	0.120148	0.393608			4.79971	0.0351105	0.375511	0.865772	0.451012	0.380505	0.560059	0.443089	0.486904	0.681068	0.480324	0.459423	0.189953			4.79971	0.0351105	0.364029	0.346786
	4.80995	0.0660591	-0.0396538	0.891628	0.9683	0.771465	0.945557	0.664837	0.878536	0.80418	0.682049	1.00808	0.680412			4.80995	0.0660591	0.204487	0.347927	0.234509	-0.102364	0.74596	0.137962	0.215546	0.0954742	0.406399	0.23101	0.388962			4.80995	0.0660591	0.381279	0.822865	0.445568	0.402725	0.521229	0.579201	0.455231	0.714935	0.534317	0.540916	0.220551			4.80995	0.0660591	0.32534	0.401669
	4.82019	0.0478516	-0.0605392	0.879852	1.07472	0.713432	0.978203	0.675312	0.883678	0.792389	0.581039	0.978733	0.662651			4.82019	0.0478516	0.207664	0.433327	0.21796	-0.213894	0.708183	0.0378876	0.197521	-0.0073204	0.451332	0.156494	0.496223			4.82019	0.0478516	0.378075	0.770603	0.465698	0.379074	0.532352	0.4758	0.46497	0.660286	0.568077	0.593208	0.305443			4.82019	0.0478516	0.322441	0.39183
	4.83043	0.0624199	-0.00431442	0.970188	1.09589	0.678959	0.935516	0.660839	0.92981	0.935978	0.643864	0.93782	0.714317			4.83043	0.0624199	0.216511	0.30302	0.208164	-0.249775	0.63401	0.0791931	0.142445	-0.0837326	0.55719	0.156197	0.560692			4.83043	0.0624199	0.374916	0.788532	0.345631	0.359119	0.508377	0.435555	0.462654	0.622021	0.635559	0.61504	0.331799			4.83043	0.0624199	0.310558	0.295956
	4.84067	0.0744972	1.90735e-05	0.935715	0.93932	0.675537	0.921474	0.535473	0.929405	0.929527	0.700512	0.98579	0.716629			4.84067	0.0744972	0.262829	0.314713	0.193356	-0.308784	0.635464	0.0361595	0.135174	-0.0531921	0.518566	0.126713	0.42823			4.84067	0.0744972	0.368095	0.742184	0.412769	0.466408	0.510452	0.447021	0.512642	0.691212	0.624519	0.554577	0.382439			4.84067	0.0744972	0.300392	0.327625
	4.85091	0.0500717	0.0260963	0.907024	0.924458	0.669708	0.9212	0.481693	0.965454	0.935654	0.702728	1.05405	0.692009			4.85091	0.0500717	0.272923	0.329376	0.211884	-0.246246	0.574657	0.0912323	0.071682	0.058815	0.555984	0.0877228	0.432243			4.85091	0.0500717	0.365273	0.784504	0.488483	0.493587	0.427269	0.40522	0.526112	0.780823	0.618557	0.56715	0.309864			4.85091	0.0500717	0.285877	0.310078
	4.86115	0.0230026	0.0354424	0.878849	0.953495	0.565712	0.865494	0.535908	0.910927	0.90155	0.649658	1.00607	0.749779			4.86115	0.0230026	0.276291	0.31208	0.267971	-0.155018	0.564583	0.0913429	0.0957146	0.144146	0.570122	0.170811	0.451744			4.86115	0.0230026	0.379059	0.741543	0.488007	0.422108	0.333752	0.364029	0.66164	0.783932	0.679379	0.572578	0.297417			4.86115	0.0230026	0.241886	0.373177
	4.87139	0.000656128	0.0326653	0.841705	0.896156	0.656452	0.804039	0.484722	0.892952	0.814754	0.576332	0.922966	0.683418			4.87139	0.000656128	0.274204	0.344921	0.244713	-0.149536	0.669487	0.0182686	0.228477	0.118866	0.609795	0.190228	0.467354			4.87139	0.000656128	0.398739	0.763287	0.496906	0.369205	0.340092	0.307907	0.578423	0.736557	0.667576	0.639748	0.302296			4.87139	0.000656128	0.209312	0.2901
	4.88163	0.0167847	0.0174065	0.874432	0.892971	0.736656	0.770973	0.395695	0.898125	0.745838	0.621037	0.956821	0.584499			4.88163	0.0167847	0.273243	0.370899	0.165977	-0.17514	0.614471	0.0447083	0.31395	0.0807724	0.563637	0.115223	0.428967			4.88163	0.0167847	0.38443	0.725689	0.427544	0.342644	0.42598	0.267319	0.464016	0.76667	0.569206	0.637032	0.356274			4.88163	0.0167847	0.229996	0.319557
	4.89187	0.000228882	0.02071	0.981384	0.827168	0.693405	0.786064	0.409943	0.892056	0.795132	0.69199	0.915981	0.564507			4.89187	0.000228882	0.266445	0.371471	0.183247	-0.168594	0.748226	0.149265	0.318638	0.0881805	0.470261	0.071846	0.472431			4.89187	0.000228882	0.369316	0.766994	0.300655	0.359406	0.475681	0.209297	0.559513	0.771904	0.538513	0.568069	0.37693			4.89187	0.000228882	0.240715	0.298386
	4.90211	-0.000289917	0.00780106	0.940746	0.699661	0.609421	0.777813	0.494656	0.893414	0.783092	0.700367	0.890217	0.557995			4.90211	-0.000289917	0.312431	0.39909	0.25108	-0.115616	0.764042	0.0649834	0.262714	0.0452423	0.501732	0.102036	0.508251			4.90211	-0.000289917	0.364029	0.753357	0.207317	0.429596	0.551712	0.251377	0.560501	0.750053	0.569275	0.539078	0.406113			4.90211	-0.000289917	0.251991	0.313335
	4.91235	-0.0190964	0.018177	0.954834	0.688122	0.590324	0.769016	0.503532	0.811398	0.78228	0.569214	0.861408	0.428391			4.91235	-0.0190964	0.357338	0.469543	0.306393	-0.0577431	0.653572	0.146809	0.300575	0.161682	0.52673	0.110348	0.459255			4.91235	-0.0190964	0.32534	0.767361	0.21809	0.434093	0.594662	0.286686	0.486664	0.810291	0.612289	0.543549	0.385681			4.91235	-0.0190964	0.203739	0.272289
	4.92259	-0.011013	0.0513802	1.01926	0.810921	0.562332	0.835262	0.465473	0.839745	0.755268	0.506836	0.820385	0.409889			4.92259	-0.011013	0.341438	0.479382	0.22242	-0.117683	0.695354	0.244034	0.34	0.088871	0.579529	0.128967	0.506416			4.92259	-0.011013	0.322441	0.769115	0.369606	0.407936	0.556744	0.399757	0.433582	0.908745	0.676865	0.490616	0.319447			4.92259	-0.011013	0.18475	0.155582
	4.93283	0.00177002	0.0608025	0.954014	0.831856	0.520157	0.778877	0.422924	0.9189	0.763515	0.578918	0.817059	0.324081			4.93283	0.00177002	0.341866	0.44968	0.144497	-0.260052	0.744373	0.134933	0.359726	0.0867577	0.569252	0.0671959	0.46574			4.93283	0.00177002	0.310558	0.694859	0.415226	0.374748	0.523113	0.444916	0.412159	0.818314	0.591019	0.518562	0.34433			4.93283	0.00177002	0.173218	0.153725
	4.94307	-0.000209808	0.0711212	0.966366	0.848518	0.518154	0.774586	0.431602	0.859047	0.735516	0.592628	0.847038	0.278011			4.94307	-0.000209808	0.329414	0.405788	0.119259	-0.21925	0.493595	0.109856	0.238918	0.0280495	0.623398	0.180023	0.459915			4.94307	-0.000209808	0.300392	0.657524	0.30262	0.429428	0.535431	0.429356	0.402184	0.668941	0.497704	0.577904	0.27813			4.94307	-0.000209808	0.175968	0.175457
	4.95331	0.0173798	0.0447655	0.952942	0.862206	0.439682	0.664444	0.379887	0.763069	0.73698	0.627785	0.979816	0.24078			4.95331	0.0173798	0.335712	0.442341	0.18177	-0.109802	0.627777	0.20488	0.242378	-0.00899887	0.644722	0.178226	0.443855			4.95331	0.0173798	0.285877	0.54739	0.250969	0.529636	0.479614	0.267113	0.494404	0.666058	0.547604	0.613712	0.311031			4.95331	0.0173798	0.178925	0.00337601
	4.96355	0.0121918	0.0570412	0.874893	0.858273	0.434032	0.693977	0.322014	0.693489	0.818211	0.562553	1.01578	0.215401			4.96355	0.0121918	0.344528	0.524067	0.219845	-0.0893936	0.726341	0.207191	0.304508	0.0542755	0.652344	0.265759	0.4398			4.96355	0.0121918	0.241886	0.462856	0.260803	0.50193	0.47821	0.208126	0.517292	0.598625	0.48835	0.590515	0.358692			4.96355	0.0121918	0.143654	0.0407982
	4.97379	-0.00868225	0.0596924	0.933891	0.838482	0.476528	0.763054	0.293011	0.706398	0.747185	0.543026	0.888275	0.218048			4.97379	-0.00868225	0.35714	0.51918	0.241611	-0.0407295	0.775501	0.117424	0.240292	0.112831	0.75703	0.258297	0.557404			4.97379	-0.00868225	0.209312	0.486099	0.288189	0.497486	0.454296	0.189743	0.482983	0.537956	0.352497	0.533165	0.349869			4.97379	-0.00868225	0.171368	-0.0242081
	4.98403	-0.0230827	0.0799751	0.889149	0.801849	0.499619	0.708885	0.32169	0.743607	0.761944	0.454525	0.812531	0.221706			4.98403	-0.0230827	0.374901	0.477688	0.34008	-0.0774384	0.654121	0.182587	0.267769	0.0780792	0.765839	0.238426	0.588219			4.98403	-0.0230827	0.229996	0.535095	0.341213	0.374233	0.51899	0.292812	0.458878	0.590469	0.39888	0.404621	0.329643			4.98403	-0.0230827	0.162308	-0.0816193
	4.99427	-0.00101471	0.0752945	0.857433	0.82394	0.441025	0.682137	0.231796	0.696449	0.795582	0.464046	0.839527	0.238205			4.99427	-0.00101471	0.375511	0.393822	0.36446	-0.0822868	0.700329	0.154526	0.272934	0.103615	0.705139	0.239201	0.562943			4.99427	-0.00101471	0.240715	0.442745	0.187408	0.362637	0.488899	0.301968	0.434711	0.586082	0.397232	0.339581	0.360241			4.99427	-0.00101471	0.129013	-0.118599
	5.00451	-0.00671768	0.0763168	0.790985	0.744164	0.362087	0.693367	0.201862	0.729946	0.707741	0.491131	0.849041	0.19521			5.00451	-0.00671768	0.381279	0.516605	0.404755	-0.0981674	0.699623	0.187737	0.176086	0.219025	0.644928	0.24527	0.485569			5.00451	-0.00671768	0.251991	0.397305	0.167343	0.27684	0.485012	0.279572	0.343578	0.521812	0.463196	0.308601	0.299301			5.00451	-0.00671768	0.0921097	-0.0572128
	5.01475	-0.00195312	0.0837021	0.824398	0.794304	0.311516	0.701233	0.199635	0.619446	0.654194	0.442398	0.761654	0.128197			5.01475	-0.00195312	0.378075	0.598469	0.4048	-0.129318	0.718281	0.198639	0.194763	0.176178	0.682964	0.22913	0.50605			5.01475	-0.00195312	0.203739	0.33305	0.115654	0.221004	0.404728	0.317276	0.296207	0.439526	0.503616	0.320236	0.165096			5.01475	-0.00195312	0.103203	-0.0876274
	5.02499	0.0299835	0.0807114	0.792057	0.776695	0.306381	0.652874	0.265972	0.601295	0.688534	0.378242	0.801216	0.063755			5.02499	0.0299835	0.374916	0.53804	0.378098	-0.097393	0.739334	0.205769	0.211731	0.160801	0.736729	0.234146	0.506939			5.02499	0.0299835	0.18475	0.375034	0.156898	0.183681	0.369762	0.215485	0.301579	0.53891	0.302319	0.278011	0.0813522			5.02499	0.0299835	0.119831	-0.0751114
	5.03523	0.039032	0.0514946	0.719898	0.782242	0.32431	0.57336	0.211796	0.598671	0.657707	0.345409	0.781879	0.184052			5.03523	0.039032	0.368095	0.487915	0.424591	-0.126457	0.620384	0.195557	0.206711	0.18103	0.690655	0.340637	0.453308			5.03523	0.039032	0.173218	0.386192	0.145138	0.236084	0.392189	0.049427	0.0487747	0.560104	0.259331	0.220062	0.184433			5.03523	0.039032	0.12579	-0.0313377
	5.04547	0.0466576	0.0379448	0.627666	0.750683	0.227592	0.567924	0.200886	0.668411	0.654488	0.386074	0.688274	0.186016			5.04547	0.0466576	0.365273	0.496761	0.512074	-0.157261	0.638634	0.290398	0.216747	0.096344	0.659615	0.29015	0.360481			5.04547	0.0466576	0.175968	0.475967	0.0806313	0.20731	0.305546	0.00842667	0.0444374	0.504089	0.33316	0.126362	0.126938			5.04547	0.0466576	0.131042	0.00294876
	5.05571	0.0276794	0.0366898	0.644691	0.675034	0.310863	0.620113	0.229923	0.680508	0.639767	0.365845	0.619968	0.143185			5.05571	0.0276794	0.379059	0.425808	0.575947	-0.0936584	0.570637	0.377922	0.171616	0.0847931	0.788429	0.282448	0.416294			5.05571	0.0276794	0.178925	0.31126	0.151485	0.191772	0.330162	0.0703583	-0.0149193	0.487019	0.249222	0.121689	0.0870132			5.05571	0.0276794	0.116112	-0.0451164
	5.06595	0.0163116	0.0458069	0.713497	0.706852	0.251865	0.66396	0.163761	0.707176	0.590687	0.28614	0.663288	0.200321			5.06595	0.0163116	0.398739	0.451534	0.468029	-0.0546455	0.707077	0.325134	0.361935	0.174488	0.782425	0.342117	0.438992			5.06595	0.0163116	0.143654	0.355042	0.00106049	0.138	0.213455	0.0980644	0.0142136	0.341656	0.140003	0.0268364	0.0962067			5.06595	0.0163116	0.13055	0.00590515
	5.07619	0.0175743	0.0644112	0.699848	0.602661	0.288986	0.561775	0.183552	0.634361	0.578495	0.326027	0.642254	0.178688			5.07619	0.0175743	0.38443	0.497761	0.362076	-0.104378	0.647457	0.355854	0.295902	0.177372	0.690094	0.255363	0.411285			5.07619	0.0175743	0.171368	0.379185	-0.0373268	0.0961418	0.171371	0.148403	0.0301323	0.300156	0.0996056	0.058342	0.0819817			5.07619	0.0175743	0.133907	-0.110619
	5.08643	-0.0457687	0.0479088	0.738674	0.544975	0.281754	0.548286	0.108616	0.546444	0.586658	0.394657	0.692593	0.11351			5.08643	-0.0457687	0.369316	0.509716	0.3652	-0.0806198	0.648697	0.500431	0.253048	0.235855	0.755062	0.317162	0.409012			5.08643	-0.0457687	0.162308	0.309494	-0.0181961	0.0957031	0.211346	0.0844574	0.0272942	0.35194	0.103691	0.0755768	-0.0450706			5.08643	-0.0457687	0.111382	-0.0906639
	5.09667	-0.0386543	0.062706	0.773865	0.521347	0.178791	0.552032	0.151436	0.5564	0.579388	0.358036	0.599693	0.227024			5.09667	-0.0386543	0.364029	0.511528	0.367893	-0.136303	0.668476	0.55061	0.337769	0.258087	0.795059	0.374088	0.315968			5.09667	-0.0386543	0.129013	0.234688	-0.0250702	0.104549	0.218937	0.0880356	0.0653076	0.306854	0.167103	0.131584	-0.130936			5.09667	-0.0386543	0.0818863	-0.0216179
	5.10691	-0.0183907	0.0754013	0.666054	0.509872	0.233307	0.49485	0.146729	0.535595	0.509579	0.310291	0.49255	0.194218			5.10691	-0.0183907	0.32534	0.530018	0.422119	-0.125416	0.590809	0.37344	0.334953	0.252506	0.721661	0.29834	0.482136			5.10691	-0.0183907	0.0921097	0.206329	-0.0813026	0.0447311	0.174259	0.0361557	0.109356	0.320396	0.136978	0.0289841	-0.205265			5.10691	-0.0183907	0.0891151	-0.079998
	5.11715	-0.0359802	0.0965462	0.574474	0.484001	0.238575	0.538052	0.0879936	0.492607	0.438446	0.300674	0.508175	0.208202			5.11715	-0.0359802	0.322441	0.491669	0.337769	-0.0582924	0.608166	0.49955	0.425304	0.262009	0.643505	0.193115	0.466743			5.11715	-0.0359802	0.103203	0.296749	-0.0813026	0.0292549	0.22385	-0.0156631	-0.00160217	0.302326	0.19688	-0.00503922	-0.142712			5.11715	-0.0359802	0.0666084	-0.0531769
	5.12739	-0.0184631	0.119415	0.652321	0.533165	0.258602	0.444233	0.169888	0.484787	0.623684	0.306396	0.616703	0.261345			5.12739	-0.0184631	0.310558	0.390591	0.3899	-0.0221558	0.611374	0.473862	0.407089	0.0813599	0.629726	0.216957	0.391727			5.12739	-0.0184631	0.119831	0.218273	-0.0570564	-0.157856	0.136292	-0.0159492	0.00876999	0.167236	0.168972	-0.0246773	-0.109516			5.12739	-0.0184631	0.0860367	-0.151691
	5.13763	-0.0641327	0.141304	0.602573	0.510262	0.171661	0.214779	0.156219	0.564388	0.567844	0.243511	0.597866	0.238087			5.13763	-0.0641327	0.300392	0.449398	0.369263	-0.0451546	0.510784	0.308121	0.387596	0.0995636	0.617924	0.175415	0.42556			5.13763	-0.0641327	0.12579	0.130093	-0.0133553	-0.261677	0.140583	0.0482178	-0.0312538	0.220158	0.129871	-0.0300636	-0.240799			5.13763	-0.0641327	0.0788345	-0.294525
	5.14787	-0.0750885	0.104809	0.536808	0.417961	0.0371857	0.320374	0.195225	0.505104	0.537247	0.126293	0.512371	0.228325			5.14787	-0.0750885	0.285877	0.463604	0.262524	-0.156116	0.513847	0.202526	0.383034	0.0497818	0.622932	0.178879	0.474125			5.14787	-0.0750885	0.131042	0.151768	-0.0551987	-0.245251	0.131264	0.0392799	-0.112911	0.243618	0.245113	0.0580444	-0.169773			5.14787	-0.0750885	0.0994835	-0.386581
	5.15811	-0.0389328	0.117962	0.479488	0.429344	0.0902634	0.27734	0.160351	0.419819	0.503139	0.220993	0.598454	0.11282			5.15811	-0.0389328	0.241886	0.451653	0.218643	-0.144062	0.481247	0.274853	0.358772	0.0975266	0.505318	0.16547	0.449863			5.15811	-0.0389328	0.116112	0.139954	-0.0841255	-0.301643	0.138256	0.0120049	-0.0289268	0.244358	0.135132	0.0172768	-0.119217			5.15811	-0.0389328	0.111568	-0.292652
	5.16835	-0.0292397	0.122932	0.472012	0.453629	0.0834961	0.173328	0.118168	0.432472	0.470467	0.191486	0.537491	0.153103			5.16835	-0.0292397	0.209312	0.371029	0.131954	-0.0877151	0.537964	0.305016	0.364685	0.0706902	0.496426	0.131401	0.369743			5.16835	-0.0292397	0.13055	0.169529	-0.0510368	-0.333035	0.00814056	-0.0080719	-0.049633	0.240829	0.117535	0.0502243	-0.135918			5.16835	-0.0292397	0.130363	-0.312798
	5.17859	-0.00985718	0.10619	0.544197	0.453102	0.109173	0.228951	0.1381	0.476276	0.481182	0.104416	0.385426	0.0911713			5.17859	-0.00985718	0.229996	0.393059	0.0793457	-0.0613937	0.547119	0.257935	0.345364	0.0387192	0.456718	0.167389	0.295654			5.17859	-0.00985718	0.133907	0.174797	-0.0522881	-0.349865	0.0537605	0.0756378	-0.1353	0.124649	0.160912	0.0254517	-0.176464			5.17859	-0.00985718	0.101055	-0.311432
	5.18883	0.00891876	0.121689	0.54702	0.44416	0.0547066	0.287949	0.144451	0.488358	0.526852	0.0610619	0.405334	0.0999451			5.18883	0.00891876	0.240715	0.379292	0.0037117	-0.0894547	0.532585	0.250282	0.279736	0.00623322	0.427784	0.122009	0.220901			5.18883	0.00891876	0.111382	0.219143	-0.0724602	-0.267647	0.120247	0.019146	-0.187546	0.11903	0.241394	0.0281334	-0.101753			5.18883	0.00891876	0.104244	-0.416359
	5.19907	0.00337601	0.111652	0.344746	0.433315	-0.00465012	0.25853	0.149185	0.44191	0.489159	0.229935	0.433182	0.0883331			5.19907	0.00337601	0.251991	0.337067	0.0516663	-0.150139	0.4865	0.263489	0.172066	0.0298843	0.354401	0.148243	0.237648			5.19907	0.00337601	0.0818863	0.260105	-0.0534821	-0.385685	0.0941391	-0.0204773	-0.184994	0.180794	0.223904	0.0888977	-0.132618			5.19907	0.00337601	0.111931	-0.345428
	5.20931	-0.00599289	0.0905914	0.279537	0.528419	0.0568047	0.196121	0.132339	0.452461	0.501507	0.176826	0.413563	0.120785			5.20931	-0.00599289	0.203739	0.34399	-0.00195694	-0.113663	0.56768	0.21854	0.190331	0.066864	0.400295	0.0481949	0.169998			5.20931	-0.00599289	0.0891151	0.222782	-0.142086	-0.466454	0.111553	0.0901489	-0.126572	0.170387	0.193924	0.140991	-0.156292			5.20931	-0.00599289	0.110062	-0.224884
	5.21955	-0.00486755	0.090229	0.380165	0.506748	0.0445366	0.142132	0.0486679	0.527241	0.484222	0.0935669	0.371052	0.148335			5.21955	-0.00486755	0.18475	0.380516	-0.048542	-0.0666351	0.581047	0.208344	0.226093	0.0423088	0.454906	0.0065155	0.213135			5.21955	-0.00486755	0.0666084	0.236538	-0.200752	-0.396	0.131416	0.105034	-0.128895	0.195347	0.153488	0.0317955	-0.133247			5.21955	-0.00486755	0.0782394	-0.265106
	5.22979	0.0098114	0.109135	0.381008	0.498482	0.0975266	0.131531	0.114265	0.583843	0.475388	0.126892	0.423012	0.131958			5.22979	0.0098114	0.173218	0.408619	-0.0231819	-0.100002	0.516769	0.0690842	0.0941048	-0.0266647	0.437958	-0.0944061	0.178436			5.22979	0.0098114	0.0860367	0.314056	-0.137188	-0.315876	0.0766983	0.0610237	-0.140934	0.208771	0.148277	0.011158	-0.0140381			5.22979	0.0098114	0.0817795	-0.196823
	5.24003	0.0332832	0.135914	0.406845	0.494431	0.02005	0.223503	0.0893173	0.562336	0.493809	0.148537	0.396069	0.106335			5.24003	0.0332832	0.175968	0.389648	-0.0405159	-0.0513306	0.48978	0.0694885	0.0992203	-0.101505	0.384895	-0.117912	0.14959			5.24003	0.0332832	0.0788345	0.308407	-0.107746	-0.388382	0.0423317	-0.0849953	-0.112492	0.144184	0.104004	-0.0272026	-0.0488853			5.24003	0.0332832	0.0919647	-0.205486
	5.25027	0.0405617	0.132214	0.436764	0.379204	-0.0315514	0.324722	0.0957642	0.41827	0.480171	0.116138	0.281311	0.0515366			5.25027	0.0405617	0.178925	0.32053	-0.01297	-0.135452	0.516602	0.0742798	0.0709686	-0.10923	0.435669	-0.122269	0.19101			5.25027	0.0405617	0.0994835	0.279438	-0.0796928	-0.38969	0.137684	-0.145912	-0.0466652	0.130081	0.052803	0.0180397	-0.049099			5.25027	0.0405617	0.0837631	-0.284584
	5.26051	0.0417404	0.127182	0.460392	0.418602	0.0263138	0.277779	0.131481	0.443661	0.455921	0.0820427	0.303089	0.0220795			5.26051	0.0417404	0.143654	0.290062	-0.0249863	-0.15522	0.566441	0.101643	0.00893021	-0.0635262	0.386993	-0.100868	0.23082			5.26051	0.0417404	0.111568	0.324108	-0.0215569	-0.247593	0.237476	-0.141998	-0.0838814	0.0713348	0.0164223	-0.0187492	-0.052948			5.26051	0.0417404	0.0805244	-0.174652
	5.27075	0.0374641	0.11245	0.42358	0.403282	0.127522	0.134872	0.0267563	0.461082	0.417072	0.150742	0.419651	0.125374			5.27075	0.0374641	0.171368	0.259354	-0.0582466	-0.2141	0.413414	-0.0370712	-0.0139694	-0.032486	0.379028	-0.136955	0.208393			5.27075	0.0374641	0.130363	0.371841	-0.10989	-0.283421	0.208614	-0.156212	-0.174564	0.11375	-0.0461388	-0.0151405	-0.101288			5.27075	0.0374641	0.0830078	-0.26149
	5.28099	0.00537872	0.0913048	0.428905	0.489391	0.133251	0.0914764	-0.0226898	0.411617	0.420303	0.0849609	0.422405	0.0601921			5.28099	0.00537872	0.162308	0.217693	-0.081562	-0.169022	0.47892	-0.167736	0.0460396	-0.0760803	0.334076	-0.142269	0.215569			5.28099	0.00537872	0.101055	0.402939	-0.168018	-0.272057	0.0332336	-0.189709	-0.180645	0.1464	-0.0362434	-0.0615692	-0.0593147			5.28099	0.00537872	0.0645103	-0.342316
	5.29123	-0.000274658	0.140438	0.553886	0.441788	-0.0263062	0.0792961	-0.0993309	0.433517	0.422817	0.0838776	0.47884	0.0409622			5.29123	-0.000274658	0.129013	0.158466	-0.16613	-0.230885	0.454376	-0.176941	0.00480652	-0.0776062	0.288597	-0.110298	0.280418			5.29123	-0.000274658	0.104244	0.370171	-0.164143	-0.205921	-0.0224686	-0.0746384	-0.0888176	0.145699	0.0441818	-0.0960464	-0.0764008			5.29123	-0.000274658	0.0857162	-0.394005
	5.30147	0.0197067	0.162727	0.524536	0.395287	0.0297203	0.176712	-0.0318375	0.45911	0.387981	0.125221	0.342129	0.136448			5.30147	0.0197067	0.0921097	0.278568	-0.220108	-0.182461	0.341709	-0.146065	-0.0656853	-0.241386	0.32753	-0.15226	0.259865			5.30147	0.0197067	0.111931	0.408115	-0.150791	-0.174732	-0.00329208	-0.0526886	-0.0579872	0.223209	0.0768852	-0.0944138	0.0411072			5.30147	0.0197067	0.0718117	-0.315495
	5.31171	0.0152893	0.158531	0.492435	0.343452	0.00989532	0.0556107	0.0590477	0.407257	0.331142	0.0306625	0.270374	0.596451			5.31171	0.0152893	0.103203	0.212994	-0.154243	-0.124191	0.338631	-0.182575	-0.00107193	-0.226009	0.287991	-0.19334	0.307884			5.31171	0.0152893	0.110062	0.378445	-0.14328	-0.217747	0.00462341	-0.110306	-0.0659065	0.142609	0.0437088	-0.208546	-0.036274			5.31171	0.0152893	0.0800781	-0.330036
	5.32195	0.00462341	0.152534	0.418896	0.342358	0.0974808	0.0550957	0.0268288	0.455536	0.311596	0.0593948	0.215874	0.402252			5.32195	0.00462341	0.119831	0.175014	-0.277218	-0.20438	0.382	-0.243347	0.0365028	-0.0459442	0.350037	-0.208344	0.265533			5.32195	0.00462341	0.0782394	0.313793	-0.200905	-0.211109	-0.108505	-0.10054	-0.0793762	0.0365829	-0.00801468	-0.217915	-0.0534744			5.32195	0.00462341	0.0394135	-0.296013
	5.33219	-0.0123138	0.150612	0.464993	0.417053	0.0614319	0.190056	-0.0107613	0.524857	0.178692	0.0094223	0.28828	0.182987			5.33219	-0.0123138	0.12579	0.206711	0.133053	-0.279736	0.400375	-0.33316	-0.0207901	-0.0424652	0.363792	-0.0892715	0.155441			5.33219	-0.0123138	0.0817795	0.359516	-0.299412	-0.283298	-0.122368	-0.0319214	-0.0971756	0.0796356	-0.0963173	-0.143848	-0.101479			5.33219	-0.0123138	0.0130577	-0.215706
	5.34243	-8.39233e-05	0.146496	0.436798	0.42535	-0.021698	0.184906	0.0320244	0.549114	0.166279	0.118641	0.257278	0.0945473			5.34243	-8.39233e-05	0.131042	0.189342	0.330177	-0.36684	0.333641	-0.293358	-0.100445	-0.101067	0.301113	-0.0704346	0.146286			5.34243	-8.39233e-05	0.0919647	0.327137	-0.295795	-0.355408	-0.0868568	0.0116463	-0.0885429	0.183235	-0.170547	-0.204922	-0.197216			5.34243	-8.39233e-05	0.00403595	-0.21804
	5.35267	-0.0206337	0.143906	0.359924	0.383389	0.0186348	0.261684	0.00206757	0.502647	0.16132	0.0767288	0.360283	-0.0259476			5.35267	-0.0206337	0.116112	0.171139	0.0318298	-0.359566	0.256401	-0.325867	-0.107178	-0.161469	0.391869	-0.0839539	0.167839			5.35267	-0.0206337	0.0837631	0.341549	-0.234997	-0.342678	0.0355225	-0.158131	-0.117905	0.204899	-0.139877	-0.111053	-0.197788			5.35267	-0.0206337	-0.0263405	-0.254242
	5.36291	-0.00986099	0.144447	0.456112	0.420235	0.0226517	0.295818	-0.0177689	0.408974	0.197605	0.0432625	0.411926	-0.132092			5.36291	-0.00986099	0.13055	0.233425	-0.122883	-0.355301	0.228092	-0.331364	-0.0903358	-0.226402	0.357014	-0.0758705	0.118881			5.36291	-0.00986099	0.0805244	0.30545	-0.257542	-0.304688	0.0199547	-0.103329	-0.17738	0.143459	-0.102287	-0.0347137	-0.226791			5.36291	-0.00986099	0.0119362	-0.21431
	5.37315	0.0262451	0.155598	0.470242	0.408672	0.0192871	0.160786	-0.0839081	0.424896	0.183422	0.0391273	0.343704	-0.0358429			5.37315	0.0262451	0.133907	0.252796	-0.153576	-0.448608	0.326893	-0.385254	-0.117756	-0.212132	0.245266	-0.103321	0.0794792			5.37315	0.0262451	0.0830078	0.340809	-0.341991	-0.304806	-0.103031	-0.206314	-0.0727234	0.0979996	-0.150139	-0.0983582	-0.228279			5.37315	0.0262451	0.0162354	-0.238411
	5.38339	0.0573654	0.174458	0.391369	0.364769	-0.0395164	0.0760994	-0.0322266	0.462963	0.217514	0.00424957	0.334179	0.0480881			5.38339	0.0573654	0.111382	0.342419	-0.0509033	-0.515541	0.420555	-0.316521	-0.0737991	-0.163971	0.300983	-0.159184	0.101295			5.38339	0.0573654	0.0645103	0.333656	-0.278103	-0.250553	-0.107586	-0.225868	-0.106556	0.0879402	-0.239212	-0.0803337	-0.244507			5.38339	0.0573654	0.0082283	-0.317844
	5.39363	0.0477295	0.147606	0.379139	0.308456	-0.0377998	0.0788803	0.0549622	0.392044	0.22102	0.024086	0.306629	0.154846			5.39363	0.0477295	0.0818863	0.350254	-0.064621	-0.438866	0.435455	-0.384628	-0.136398	-0.191093	0.24382	-0.160019	0.117043			5.39363	0.0477295	0.0857162	0.335205	-0.251736	-0.376175	-0.0271454	-0.109352	-0.146004	0.105812	-0.200684	-0.012886	-0.252068			5.39363	0.0477295	0.00394058	-0.246258
	5.40387	-0.000160217	0.178047	0.406971	0.342152	0.0329742	0.124584	0.0730324	0.350597	0.219006	0.00766754	0.303112	0.113941			5.40387	-0.000160217	0.0891151	0.373173	-0.055275	-0.378586	0.479706	-0.367161	-0.0964165	-0.251305	0.28476	-0.196709	0.122322			5.40387	-0.000160217	0.0718117	0.332333	-0.268784	-0.297321	0.0672798	-0.048111	-0.101192	0.104462	-0.218994	-0.0259399	-0.272022			5.40387	-0.000160217	0.000816345	-0.237339
	5.41411	-0.00468445	0.204487	0.494175	0.298119	0.0313416	0.116646	0.00837326	0.297367	0.172108	-0.0304184	0.298332	0.051178			5.41411	-0.00468445	0.0666084	0.350681	-0.042366	-0.476967	0.532959	-0.303658	0.0890884	-0.215065	0.391701	-0.132694	0.142399			5.41411	-0.00468445	0.0800781	0.430454	-0.288322	-0.309704	0.0533447	-0.144432	-0.0815582	0.143959	-0.20842	-0.0133972	-0.318153			5.41411	-0.00468445	-0.0413322	-0.297436
	5.42435	0.0316925	0.207664	0.464779	0.260891	-0.0807533	0.182602	0.055378	0.248413	0.239281	-0.13084	0.34528	-0.0111313			5.42435	0.0316925	0.0860367	0.321236	-0.0522385	-0.382328	0.527164	-0.236671	-0.0225525	-0.147438	0.513512	-0.160759	0.113811			5.42435	0.0316925	0.0394135	0.369671	-0.121597	-0.332699	0.0146866	-0.147148	-0.109776	0.208889	-0.128178	0.00268555	-0.197407			5.42435	0.0316925	-0.0100975	-0.187191
	5.43459	0.0695953	0.216511	0.385124	0.229	-0.0308762	0.190483	-0.0567589	0.248039	0.228565	-0.178993	0.29546	-0.0146713			5.43459	0.0695953	0.0788345	0.286129	-0.108086	-0.451946	0.455853	-0.261505	-0.0545349	-0.112297	0.485268	-0.101738	0.128357			5.43459	0.0695953	0.0130577	0.293575	-0.151005	-0.273502	0.0260315	-0.174702	-0.108009	0.208725	-0.140709	-0.0690918	-0.130829			5.43459	0.0695953	0.0217896	-0.170868
	5.44483	0.0915222	0.262829	0.395767	0.253284	-0.0795937	0.166641	0.0116272	0.251965	0.169209	0.0716248	0.366497	0.0733871			5.44483	0.0915222	0.0994835	0.209705	-0.0489082	-0.51635	0.518185	-0.2351	-0.0320282	-0.111511	0.38903	-0.135319	0.17181			5.44483	0.0915222	0.00403595	0.231815	-0.180916	-0.318264	0.0437622	-0.116623	0.0284691	0.153996	-0.169353	-0.0195007	-0.094017			5.44483	0.0915222	0.0389709	-0.196465
	5.45507	0.0629807	0.272923	0.522701	0.24955	-0.114689	0.191376	-0.0275917	0.200439	0.126892	0.0440483	0.390324	0.0440826			5.45507	0.0629807	0.111568	0.194958	0.00581741	-0.513863	0.553535	-0.188862	-0.020134	-0.143158	0.388138	-0.0978279	0.142937			5.45507	0.0629807	-0.0263405	0.211575	-0.170498	-0.275059	0.0397797	-0.103176	-0.00180817	0.124432	-0.147919	-0.0358582	-0.0423393			5.45507	0.0629807	-0.01334	-0.136097
	5.46531	0.0471687	0.276291	0.522335	0.222824	-0.151848	0.0456772	0.0432777	0.20726	0.1301	-0.036274	0.37191	0.0130806			5.46531	0.0471687	0.130363	0.199818	0.0157356	-0.421547	0.526283	-0.155064	-0.0166016	-0.222687	0.447311	-0.0901527	0.132336			5.46531	0.0471687	0.0119362	0.204758	-0.206436	-0.159107	0.057148	-0.175045	-0.0955887	0.243977	-0.180988	-0.117168	-0.0522003			5.46531	0.0471687	-0.00298309	-0.179611
	5.47555	0.0715103	0.274204	0.608498	0.215233	-0.0710602	0.143303	0.0817604	0.31768	0.183411	0.0301971	0.226864	0.00630951			5.47555	0.0715103	0.101055	0.212124	0.00197983	-0.469479	0.529453	-0.149952	-0.0546799	-0.25375	0.406185	0.0256958	0.214962			5.47555	0.0715103	0.0162354	0.332535	-0.13192	-0.136803	0.058712	-0.140179	-0.141376	0.282791	-0.136093	-0.15255	-0.0753365			5.47555	0.0715103	-0.0172386	-0.210388
	5.48579	0.0984383	0.273243	0.58847	0.281261	-0.0696983	0.194298	-0.0220375	0.313389	0.241547	0.0816612	0.285492	0.139641			5.48579	0.0984383	0.104244	0.25565	0.0324974	-0.472092	0.556499	-0.149307	-0.0892029	-0.188591	0.304443	0.0235748	0.224842			5.48579	0.0984383	0.0082283	0.326313	-0.120834	-0.230618	0.167248	-0.152634	-0.0922012	0.34404	0.0578613	-0.161324	-0.137398			5.48579	0.0984383	-0.00152206	-0.225601
	5.49603	0.109833	0.266445	0.600082	0.305458	-0.0840683	0.330708	0.105293	0.343407	0.149864	0.00363922	0.294876	0.198936			5.49603	0.109833	0.111931	0.21941	0.0409279	-0.341282	0.508781	-0.143631	-0.0109291	-0.125793	0.282246	-0.0150833	0.270275			5.49603	0.109833	0.00394058	0.35471	5.72205e-05	-0.149048	0.115749	-0.143589	-0.0811157	0.324894	0.0302582	-0.107216	-0.0338974			5.49603	0.109833	0.0253525	-0.225506
	5.50627	0.105118	0.312431	0.457676	0.330509	-0.0808945	0.25946	0.0813637	0.333534	0.171131	0.0629692	0.273823	0.211182			5.50627	0.105118	0.110062	0.245144	0.0290146	-0.342567	0.59684	-0.142139	0.0750427	-0.0415192	0.180687	-0.00692749	0.269905			5.50627	0.105118	0.000816345	0.30006	-0.00208664	-0.137447	0.00592422	-0.142681	-0.105053	0.295841	0.203175	-0.0705566	-0.064312			5.50627	0.105118	0.0226173	-0.256149
	5.51651	0.124802	0.357338	0.52956	0.392292	-0.0658379	0.221432	0.0733223	0.36409	0.287479	0.0423698	0.147961	0.169659			5.51651	0.124802	0.0782394	0.2505	0.0650063	-0.435455	0.594719	-0.0730858	0.08881	-0.0937004	0.226765	-0.056282	0.202671			5.51651	0.124802	-0.0413322	0.347866	-0.00362778	-0.108097	0.0201111	-0.11377	-0.222473	0.337029	0.119442	0.0651741	-0.120052			5.51651	0.124802	-0.00704193	-0.259811
	5.52675	0.136108	0.341438	0.602787	0.53949	-0.0283012	0.283302	0.024334	0.443733	0.307709	0.00206375	0.283871	0.185871			5.52675	0.136108	0.0817795	0.251163	0.152363	-0.453911	0.523312	-0.0811043	0.0522995	-0.0901947	0.211395	0.00503922	0.205196			5.52675	0.136108	-0.0100975	0.304092	-0.0496292	0.00376892	-0.0406151	-0.10936	-0.161762	0.352646	0.00284195	-0.0558128	-0.164375			5.52675	0.136108	-0.0426064	-0.167854
	5.53699	0.126526	0.341866	0.584976	0.650143	0.0187759	0.350281	0.0748787	0.476395	0.260597	-0.0211906	0.366711	0.24015			5.53699	0.126526	0.0919647	0.401878	0.224232	-0.395679	0.525257	-0.0169373	0.0463638	-0.0509605	0.268177	0.04142	0.221577			5.53699	0.126526	0.0217896	0.311386	0.0579567	0.00618744	0.0258179	-0.0595474	-0.0830841	0.356041	0.0275803	-0.0747223	-0.08461			5.53699	0.126526	-0.0265923	-0.202866
	5.54723	0.166458	0.329414	0.669582	0.614929	-0.0297089	0.349567	0.168461	0.434734	0.350063	0.0850563	0.385532	0.218334			5.54723	0.166458	0.0837631	0.400177	0.239563	-0.378998	0.527332	0.000671387	0.105976	-0.0289078	0.34782	-0.00354385	0.164188			5.54723	0.166458	0.0389709	0.33456	0.0497208	-0.0310555	0.0534668	-0.0772934	0.0114136	0.291733	0.092598	0.0203629	-0.197811			5.54723	0.166458	-0.0474701	-0.15789
	5.55747	0.1716	0.335712	0.603802	0.57349	-0.0192413	0.396702	0.120335	0.560215	0.334625	0.122696	0.412762	0.159073			5.55747	0.1716	0.0805244	0.406242	0.230255	-0.250015	0.509567	0.114216	-0.0154266	0.0180855	0.382343	0.00339508	0.200405			5.55747	0.1716	-0.01334	0.281658	0.0946846	0.0234947	0.104473	-0.0351791	-0.0116539	0.273659	0.170448	0.077404	-0.111042			5.55747	0.1716	-0.0637817	-0.133236
	5.56771	0.223183	0.344528	0.631695	0.612106	0.122276	0.457344	0.104683	0.610554	0.327892	0.0788345	0.448711	0.115074			5.56771	0.223183	0.0830078	0.374046	0.14452	-0.1875	0.442726	0.195293	-0.0139236	0.0907784	0.449211	0.0544891	0.19503			5.56771	0.223183	-0.00298309	0.359035	0.102612	-0.0981445	0.0895844	0.0635147	-0.00712585	0.255253	0.062748	0.0197296	-0.0763283			5.56771	0.223183	-0.0796471	-0.15313
	5.57795	0.231094	0.35714	0.699574	0.690853	0.153866	0.514145	0.171249	0.527313	0.304337	0.115875	0.382137	0.164642			5.57795	0.231094	0.0645103	0.411835	0.173702	-0.249039	0.452538	0.167351	0.0673523	0.153896	0.365677	0.0878906	0.280396			5.57795	0.231094	-0.0172386	0.344002	0.0521622	-0.0742645	0.0793915	0.104939	0.0159187	0.29147	0.109131	0.0258827	-0.0652275			5.57795	0.231094	-0.118576	-0.125561
	5.58819	0.253922	0.374901	0.697834	0.673626	0.187538	0.508545	0.261097	0.514187	0.400215	0.109486	0.35038	0.116055			5.58819	0.253922	0.0857162	0.431442	0.201954	-0.21492	0.477264	0.145473	0.0875626	0.123943	0.315552	0.0714722	0.306023			5.58819	0.253922	-0.00152206	0.346092	0.0800247	-0.0198822	0.0710831	0.15004	0.0183601	0.30687	0.195118	0.0928078	-0.124821			5.58819	0.253922	-0.128941	-0.153263
	5.59843	0.29039	0.375511	0.64587	0.684441	0.212944	0.473534	0.291451	0.637604	0.405697	0.0922012	0.470886	0.246906			5.59843	0.29039	0.0718117	0.41814	0.18618	-0.14547	0.477844	0.226597	0.0812988	0.120422	0.320808	0.0250282	0.144257			5.59843	0.29039	0.0253525	0.358871	0.130733	-0.0181389	0.153481	0.180344	0.0351601	0.276615	0.206253	0.107349	-0.0817146			5.59843	0.29039	-0.151752	-0.137276
	5.60867	0.340729	0.381279	0.650986	0.777145	0.203743	0.426979	0.22253	0.722683	0.314255	0.187256	0.589729	0.235645			5.60867	0.340729	0.0800781	0.296558	0.285568	-0.107773	0.520321	0.196804	0.068512	0.105846	0.280918	0.0505524	0.192966			5.60867	0.340729	0.0226173	0.305489	0.0775528	-0.120937	0.161812	0.266777	0.0173607	0.277626	0.24292	0.0724335	-0.00484848			5.60867	0.340729	-0.189507	-0.110428
	5.61891	0.377628	0.378075	0.749653	0.789452	0.288692	0.440666	0.267353	0.637638	0.359818	0.216118	0.672771	0.11306			5.61891	0.377628	0.0394135	0.361744	0.327755	-0.0971069	0.494644	0.140846	0.165024	0.0869141	0.273254	0.0811195	0.15992			5.61891	0.377628	-0.00704193	0.338638	0.155006	-0.106777	0.159966	0.310734	-0.0146446	0.336052	0.183125	0.0572929	-0.0798073			5.61891	0.377628	-0.212605	-0.0327454
	5.62915	0.394558	0.374916	0.802094	0.832569	0.349655	0.462948	0.303036	0.622204	0.454739	0.140266	0.653053	0.199287			5.62915	0.394558	0.0130577	0.450436	0.388359	-0.109051	0.452324	0.247349	0.203587	0.0840073	0.24379	0.10323	0.216476			5.62915	0.394558	-0.0426064	0.382141	0.184532	-0.109829	0.139091	0.296532	0.00896835	0.314129	0.222225	0.094368	-0.0625687			5.62915	0.394558	-0.22884	0.022522
	5.63939	0.399822	0.368095	0.849064	0.919102	0.358105	0.468529	0.300232	0.662758	0.426609	0.150993	0.72187	0.234272			5.63939	0.399822	0.00403595	0.48101	0.377262	-0.0219421	0.464302	0.339378	0.157475	0.171196	0.235069	0.122627	0.283733			5.63939	0.399822	-0.0265923	0.446251	0.167007	-0.122257	0.229523	0.270569	0.0525665	0.281559	0.28289	0.141541	-0.0747643			5.63939	0.399822	-0.220291	0.0262909
	5.64963	0.417408	0.365273	0.87952	0.987839	0.424885	0.511093	0.384983	0.75119	0.39465	0.219002	0.630974	0.26133			5.64963	0.417408	-0.0263405	0.48534	0.317135	0.00565338	0.534172	0.387184	0.0704651	0.312325	0.363651	0.189941	0.221161			5.64963	0.417408	-0.0474701	0.431503	0.0628319	-0.144909	0.195946	0.272919	-0.0569801	0.185516	0.273796	0.0185471	-0.101871			5.64963	0.417408	-0.238701	0.0614548
	5.65987	0.480572	0.379059	0.878914	1.04777	0.488083	0.510132	0.320068	0.797894	0.431343	0.348549	0.644279	0.20118			5.65987	0.480572	0.0119362	0.527119	0.376652	0.0287933	0.547394	0.365097	0.0443459	0.321781	0.368172	0.130768	0.195435			5.65987	0.480572	-0.0637817	0.452114	-0.350883	-0.18047	0.243248	0.376522	-0.0713768	0.199116	0.223381	0.082531	-0.0857086			5.65987	0.480572	-0.243465	0.120941
	5.67011	0.517204	0.398739	0.875671	0.979389	0.46804	0.580021	0.354488	0.840771	0.522522	0.327599	0.709877	0.187469			5.67011	0.517204	0.0162354	0.454403	0.349594	0.0765724	0.565033	0.452271	0.0377808	0.254097	0.40012	0.155098	0.328388			5.67011	0.517204	-0.0796471	0.538029	-0.146687	-0.187145	0.27108	0.373138	0.0278168	0.164375	0.325542	0.196041	0.0362206			5.67011	0.517204	-0.250969	0.103359
	5.68035	0.56543	0.38443	0.947777	1.04111	0.516071	0.481522	0.36121	0.824932	0.499516	0.340324	0.679874	0.237434			5.68035	0.56543	0.0082283	0.53772	0.422134	0.0707397	0.619583	0.378994	0.127937	0.101318	0.520004	0.284023	0.353302			5.68035	0.56543	-0.118576	0.4972	0.141689	-0.248203	0.289749	0.364567	0.0950851	0.167023	0.354595	0.169849	0.0416336			5.68035	0.56543	-0.258938	0.0788841
	5.69059	0.626003	0.369316	0.970821	1.07881	0.563255	0.403416	0.358837	0.907696	0.540634	0.344257	0.781345	0.416496			5.69059	0.626003	0.00394058	0.553982	0.444641	0.110626	0.545689	0.302757	0.0242233	0.131989	0.538841	0.152836	0.328976			5.69059	0.626003	-0.128941	0.403431	0.190754	-0.168026	0.28796	0.437199	0.0794106	0.202469	0.321442	0.222794	0.0336456			5.69059	0.626003	-0.294373	0.0515518
	5.70083	0.681137	0.364029	1.03672	1.12777	0.600449	0.487396	0.457722	0.990211	0.658852	0.363911	0.813637	0.355782			5.70083	0.681137	0.000816345	0.55484	0.50597	0.182858	0.524708	0.361217	0.129665	0.287079	0.499977	0.198906	0.374619			5.70083	0.681137	-0.151752	0.459934	0.19886	-0.194489	0.308201	0.395824	0.0376015	0.223923	0.347347	0.278084	0.0580139			5.70083	0.681137	-0.306831	0.178272
	5.71107	0.714741	0.32534	1.05905	1.1911	0.622986	0.591537	0.477139	0.976707	0.719303	0.457695	0.859604	0.365345			5.71107	0.714741	-0.0413322	0.529076	0.54958	0.148537	0.651436	0.334133	0.159779	0.271072	0.586403	0.246925	0.387398			5.71107	0.714741	-0.189507	0.512157	0.184261	-0.0872841	0.308456	0.491764	0.00302124	0.278126	0.378319	0.276604	0.0503197			5.71107	0.714741	-0.285767	0.175087
	5.72131	0.756432	0.322441	1.06966	1.16546	0.641502	0.643982	0.499161	0.993958	0.832539	0.521675	0.806461	0.369755			5.72131	0.756432	-0.0100975	0.664654	0.555767	0.100708	0.697693	0.384289	0.194088	0.246738	0.55452	0.216324	0.502338			5.72131	0.756432	-0.212605	0.48455	0.121449	-0.0409355	0.318336	0.561359	0.0462723	0.279739	0.474617	0.219456	0.0234642			5.72131	0.756432	-0.313881	0.158421
	5.73155	0.811413	0.310558	1.0819	1.11402	0.723221	0.697968	0.468174	1.07386	0.85569	0.625854	0.859501	0.411716			5.73155	0.811413	0.0217896	0.752022	0.527302	0.182774	0.753807	0.372917	0.24054	0.296677	0.653938	0.226181	0.506645			5.73155	0.811413	-0.22884	0.554279	0.334904	-0.10215	0.402916	0.557671	0.0300941	0.246529	0.528198	0.230232	0.0576553			5.73155	0.811413	-0.344841	0.134529
	5.74179	0.8703	0.300392	1.13398	1.05469	0.704098	0.685871	0.46254	1.05756	0.939724	0.632896	0.906357	0.450493			5.74179	0.8703	0.0389709	0.768044	0.610374	0.185673	0.80938	0.367073	0.308956	0.346016	0.842125	0.308578	0.479141			5.74179	0.8703	-0.220291	0.752651	0.285564	-0.0768318	0.355972	0.52264	-0.0202599	0.313595	0.526527	0.188469	0.12709			5.74179	0.8703	-0.346107	0.243538
	5.75203	0.910004	0.285877	1.24871	1.06152	0.848785	0.694809	0.539906	1.01729	0.941402	0.678829	0.954296	0.429058			5.75203	0.910004	-0.01334	0.716045	0.656189	0.220993	0.83744	0.406876	0.357555	0.37999	0.797096	0.295658	0.533882			5.75203	0.910004	-0.238701	0.745564	0.310249	-0.0415916	0.396248	0.579552	0.0489502	0.384724	0.488087	0.103928	0.131409			5.75203	0.910004	-0.38409	0.357666
	5.76227	0.931232	0.241886	1.09702	1.05241	0.808811	0.708004	0.514038	1.06555	0.776764	0.638275	0.924953	0.468987			5.76227	0.931232	-0.00298309	0.756756	0.665081	0.238289	0.920841	0.548344	0.369049	0.408672	0.812679	0.23621	0.606995			5.76227	0.931232	-0.243465	0.752522	0.3391	-0.0846519	0.470016	0.572659	0.193863	0.342358	0.596851	0.188423	0.138203			5.76227	0.931232	-0.404079	0.314133
	5.77251	0.969234	0.209312	0.985939	1.19086	0.717808	0.75502	0.477726	1.10041	0.857609	0.70013	0.947079	0.473309			5.77251	0.969234	-0.0172386	0.790825	0.685883	0.279236	1.01228	0.530281	0.443665	0.533768	0.902763	0.262009	0.615944			5.77251	0.969234	-0.250969	0.752342	0.316368	-0.0384064	0.496193	0.56279	0.226715	0.280251	0.692436	0.305916	0.172882			5.77251	0.969234	-0.417164	0.307907
	5.78275	1.03487	0.229996	1.01994	1.12655	0.762558	0.854744	0.423161	1.00135	0.916405	0.762215	1.03898	0.498463			5.78275	1.03487	-0.00152206	0.828518	0.736561	0.355721	1.02161	0.449902	0.497139	0.553333	0.901512	0.295456	0.656857			5.78275	1.03487	-0.258938	0.807957	0.361954	-0.113605	0.520752	0.587021	0.174671	0.283848	0.741787	0.268475	0.172546			5.78275	1.03487	-0.421734	0.403076
	5.79299	1.11438	0.240715	1.07924	1.15032	0.805439	0.901314	0.437634	1.16928	1.00765	0.753868	1.10521	0.625946			5.79299	1.11438	0.0253525	0.952713	0.809566	0.405563	1.03568	0.460808	0.522865	0.524712	0.909534	0.30069	0.685768			5.79299	1.11438	-0.294373	0.880184	0.401318	-0.0986214	0.490772	0.614456	0.210812	0.304844	0.719685	0.422371	0.113739			5.79299	1.11438	-0.395859	0.457039
	5.80323	1.17668	0.251991	1.10254	1.20965	0.815605	0.855625	0.50816	1.19784	0.987309	0.870239	1.17033	0.575996			5.80323	1.17668	0.0226173	0.990261	0.895061	0.432991	1.13192	0.566975	0.542442	0.627007	0.939541	0.385635	0.619354			5.80323	1.17668	-0.306831	0.788822	0.44471	-0.0599594	0.549934	0.620567	0.289364	0.353252	0.706367	0.367157	0.224197			5.80323	1.17668	-0.402603	0.497635
	5.81347	1.26189	0.203739	1.06835	1.31354	0.837791	0.768444	0.563221	1.20479	1.01542	0.908295	1.07954	0.67997			5.81347	1.26189	-0.00704193	1.05462	0.834869	0.481155	1.14251	0.6689	0.626419	0.613941	0.984341	0.488632	0.643974			5.81347	1.26189	-0.285767	0.757851	0.443729	0.0631371	0.548946	0.642075	0.268406	0.375938	0.797813	0.345898	0.27956			5.81347	1.26189	-0.449028	0.470535
	5.82371	1.29673	0.18475	1.17575	1.32177	0.857807	0.917564	0.606686	1.11948	1.13637	0.809135	1.11965	0.733128			5.82371	1.29673	-0.0426064	1.13751	0.919319	0.514618	1.12038	0.715412	0.667015	0.698891	1.09693	0.575584	0.766769			5.82371	1.29673	-0.313881	0.853329	0.478802	0.162899	0.530502	0.700317	0.224537	0.425198	0.844975	0.276699	0.348343			5.82371	1.29673	-0.458176	0.48843
	5.83395	1.3345	0.173218	1.34645	1.24551	0.942387	0.955235	0.614708	1.20565	1.14892	0.843536	1.11747	0.631657			5.83395	1.3345	-0.0265923	1.1997	0.923172	0.530926	1.17152	0.795227	0.78833	0.721359	1.21888	0.545662	0.780682			5.83395	1.3345	-0.344841	0.95668	0.516243	0.126316	0.638481	0.69796	0.292271	0.419739	0.867371	0.371899	0.33168			5.83395	1.3345	-0.475327	0.385944
	5.84419	1.41163	0.175968	1.25788	1.4412	0.976181	0.987076	0.591793	1.28303	1.16288	0.996101	1.068	0.713062			5.84419	1.41163	-0.0474701	1.12247	0.899937	0.586987	1.23454	0.68317	0.891533	0.753391	1.23307	0.650757	0.898354			5.84419	1.41163	-0.346107	1.02283	0.417492	0.125675	0.726078	0.735069	0.348537	0.390518	0.916962	0.398159	0.356514			5.84419	1.41163	-0.479359	0.424255
	5.85443	1.49418	0.178925	1.33374	1.42952	0.954117	1.04372	0.629932	1.31654	1.16071	0.93013	1.17074	0.777222			5.85443	1.49418	-0.0637817	1.15554	0.945259	0.572277	1.25768	0.713066	0.918125	0.876236	1.22421	0.761192	0.975121			5.85443	1.49418	-0.38409	1.08379	0.407871	0.229908	0.740692	0.856449	0.348751	0.377235	0.959137	0.413551	0.366814			5.85443	1.49418	-0.496819	0.448044
	5.86467	1.57506	0.143654	1.29445	1.41215	0.995174	1.03997	0.635319	1.45543	1.2389	0.907341	1.20864	0.762238			5.86467	1.57506	-0.0796471	1.29912	1.0076	0.570728	1.31252	0.803356	0.926723	0.917458	1.31596	0.760262	0.966743			5.86467	1.57506	-0.404079	1.10007	0.534698	0.208988	0.732658	0.812328	0.273994	0.477509	0.981468	0.515499	0.419456			5.86467	1.57506	-0.532661	0.486794
	5.87491	1.63843	0.171368	1.39793	1.49748	1.0416	1.00359	0.582447	1.41815	1.3202	0.947693	1.25006	0.807491			5.87491	1.63843	-0.118576	1.26301	1.12495	0.528313	1.34811	0.866642	1.03462	0.917091	1.32314	0.808281	1.01162			5.87491	1.63843	-0.417164	1.05847	0.5741	0.330975	0.644848	0.779533	0.34576	0.501755	1.03615	0.668289	0.484169			5.87491	1.63843	-0.525639	0.559654
	5.88515	1.71541	0.162308	1.5277	1.54218	1.18166	1.11978	0.664982	1.39549	1.45918	0.962173	1.26715	0.925327			5.88515	1.71541	-0.128941	1.40168	1.16343	0.600124	1.43398	0.826157	1.07395	1.00777	1.37814	0.942844	0.973976			5.88515	1.71541	-0.421734	1.10566	0.474583	0.321545	0.628151	0.761711	0.39925	0.482475	0.98967	0.630497	0.577385			5.88515	1.71541	-0.545174	0.607578
	5.89539	1.79977	0.129013	1.6359	1.51849	1.21936	1.2045	0.657734	1.31536	1.52786	0.998295	1.33639	0.989391			5.89539	1.79977	-0.151752	1.43166	1.07479	0.755039	1.48085	0.933556	1.05389	1.02908	1.36763	1.04984	0.958447			5.89539	1.79977	-0.395859	1.14377	0.463997	0.389755	0.692677	0.810482	0.522976	0.482239	0.969524	0.622669	0.57267			5.89539	1.79977	-0.537323	0.567238
	5.90563	1.88692	0.0921097	1.72292	1.56425	1.32713	1.25655	0.776569	1.44259	1.46582	1.15496	1.51598	1.01863			5.90563	1.88692	-0.189507	1.46028	1.15139	0.83802	1.60839	0.974789	1.06367	1.01311	1.33485	1.07571	1.05995			5.90563	1.88692	-0.402603	1.2628	0.589691	0.512054	0.709808	0.857437	0.511711	0.437073	1.09884	0.686729	0.582844			5.90563	1.88692	-0.568226	0.548702
	5.91587	1.94712	0.103203	1.76528	1.63685	1.31407	1.22314	0.803127	1.45917	1.46614	1.18785	1.53377	0.942684			5.91587	1.94712	-0.212605	1.49749	1.12595	0.90255	1.70503	0.919666	1.06621	0.994751	1.41279	1.04627	1.06026			5.91587	1.94712	-0.449028	1.2482	0.621376	0.483253	0.855705	0.866161	0.530483	0.537064	1.12154	0.728455	0.57272			5.91587	1.94712	-0.587105	0.53653
	5.92611	2.04259	0.119831	1.90887	1.76138	1.30741	1.31696	0.830524	1.5236	1.58362	1.19568	1.52143	1.0463			5.92611	2.04259	-0.22884	1.50031	1.09477	0.91753	1.63593	1.06861	0.978462	1.08712	1.47311	1.05918	1.08587			5.92611	2.04259	-0.458176	1.25053	0.510666	0.57502	0.819553	1.04644	0.596256	0.549316	1.21834	0.686169	0.565224			5.92611	2.04259	-0.595161	0.639122
	5.93635	2.1434	0.12579	2.04536	1.82145	1.40808	1.41027	0.808731	1.52284	1.72585	1.34841	1.55312	1.12145			5.93635	2.1434	-0.220291	1.50103	1.23354	0.914062	1.60978	1.12211	0.996613	1.12841	1.46981	1.07754	1.14761			5.93635	2.1434	-0.475327	1.34553	0.443729	0.527443	0.835964	1.0411	0.578899	0.690544	1.28479	0.762978	0.588039			5.93635	2.1434	-0.585213	0.830086
	5.94659	2.25349	0.131042	2.14492	1.99733	1.48055	1.48481	0.830379	1.57596	1.90809	1.47985	1.60894	1.15986			5.94659	2.25349	-0.238701	1.58119	1.3165	0.956177	1.6136	1.25381	1.05223	1.26104	1.49067	1.04815	1.12322			5.94659	2.25349	-0.479359	1.46483	0.510345	0.520924	0.908768	1.04933	0.570076	0.653519	1.35236	0.845924	0.642044			5.94659	2.25349	-0.617779	0.897949
	5.95683	2.39044	0.116112	2.20679	2.09352	1.65613	1.56107	0.958042	1.59522	1.99224	1.59042	1.72446	1.24927			5.95683	2.39044	-0.243465	1.5418	1.30458	1.00264	1.66991	1.23158	1.14944	1.29616	1.58241	1.09503	1.15601			5.95683	2.39044	-0.496819	1.48273	0.542248	0.608479	0.977848	1.06175	0.546745	0.615036	1.3718	0.851433	0.699368			5.95683	2.39044	-0.631134	0.887589
	5.96707	2.50162	0.13055	2.35675	2.08567	1.84386	1.70544	1.0071	1.61101	2.19138	1.69297	1.82803	1.35483			5.96707	2.50162	-0.250969	1.51763	1.39713	1.1599	1.63403	1.37121	1.21629	1.33435	1.71544	1.06607	1.18515			5.96707	2.50162	-0.532661	1.49777	0.559315	0.650505	0.96265	1.10349	0.640575	0.619102	1.36848	0.891495	0.73233			5.96707	2.50162	-0.674534	0.793056
	5.97731	2.6106	0.133907	2.53194	2.22478	1.901	1.70544	0.996502	1.74001	2.31109	1.91014	1.81291	1.43221			5.97731	2.6106	-0.258938	1.54574	1.54169	1.26228	1.74949	1.36839	1.30877	1.38464	1.82708	1.13676	1.2149			5.97731	2.6106	-0.525639	1.56432	0.591549	0.716572	0.938667	1.13967	0.692776	0.635006	1.39093	0.872898	0.731197			5.97731	2.6106	-0.691391	0.904041
	5.98755	2.795	0.111382	2.50496	2.31565	2.00008	1.75027	1.1597	1.81725	2.47953	2.01165	1.87577	1.48763			5.98755	2.795	-0.294373	1.63545	1.54463	1.13344	1.82787	1.39705	1.40701	1.48972	1.89963	1.28403	1.25934			5.98755	2.795	-0.545174	1.49547	0.602901	0.772839	0.993774	1.21676	0.737743	0.717331	1.45932	0.928497	0.708023			5.98755	2.795	-0.69202	0.929077
	5.99779	2.92538	0.0818863	2.54262	2.5185	2.10361	1.87974	1.28197	1.93459	2.64737	2.07168	2.00993	1.57095			5.99779	2.92538	-0.306831	1.67238	1.63645	1.18747	1.85718	1.42046	1.41082	1.49545	1.97142	1.35046	1.30327			5.99779	2.92538	-0.537323	1.52972	0.634918	0.844635	1.00554	1.35954	0.675087	0.823071	1.41148	0.946251	0.846535			5.99779	2.92538	-0.713783	0.902779
	6.00803	3.03455	0.0891151	2.68447	2.68507	2.25374	2.02105	1.3955	1.92812	2.77094	2.16278	2.09273	1.67391			6.00803	3.03455	-0.285767	1.6933	1.63221	1.23016	1.89671	1.49687	1.43663	1.5509	1.9076	1.37996	1.31998			6.00803	3.03455	-0.568226	1.59755	0.713406	0.915436	0.977158	1.31406	0.753944	0.786972	1.45838	0.930943	0.844673			6.00803	3.03455	-0.750069	1.03767
	6.01827	3.23175	0.0666084	2.85989	2.72938	2.48976	2.13219	1.57515	2.05899	2.9291	2.25018	2.26698	1.85788			6.01827	3.23175	-0.313881	1.81158	1.66005	1.2962	1.95096	1.5134	1.35329	1.65423	2.12582	1.24468	1.44176			6.01827	3.23175	-0.587105	1.59872	0.795135	1.03936	0.957108	1.30449	0.75877	0.597504	1.48718	0.969662	0.878265			6.01827	3.23175	-0.751995	1.07099
	6.02851	3.38575	0.0860367	3.0378	2.88998	2.70404	2.21391	1.70356	2.02232	3.0507	2.38255	2.33011	1.97171			6.02851	3.38575	-0.344841	1.88343	1.80251	1.29015	2.02724	1.51023	1.48549	1.75862	2.31456	1.30658	1.52813			6.02851	3.38575	-0.595161	1.60811	0.764153	1.1093	0.935909	1.378	0.723125	0.45512	1.48542	0.963665	0.869373			6.02851	3.38575	-0.734077	1.07747
	6.03875	3.57433	0.0788345	3.15384	3.15051	2.8695	2.32934	1.83187	2.06662	3.43525	2.67971	2.46666	2.17272			6.03875	3.57433	-0.346107	1.86631	1.9117	1.34561	2.05231	1.58135	1.49697	1.73735	2.3955	1.4156	1.54871			6.03875	3.57433	-0.585213	1.64801	0.794563	1.04165	0.876846	1.39895	0.762417	0.533211	1.54316	0.888107	0.796188			6.03875	3.57433	-0.767403	1.09705
	6.04899	3.7902	0.0994835	3.34024	3.35499	3.03419	2.47214	1.91515	2.20373	3.7304	2.93478	2.525	2.25073			6.04899	3.7902	-0.38409	1.92583	1.97811	1.33132	2.07474	1.56162	1.64127	1.76713	2.43191	1.52875	1.60678			6.04899	3.7902	-0.617779	1.65075	0.788128	1.12479	1.01297	1.39952	0.876122	0.544621	1.59499	0.934364	0.826698			6.04899	3.7902	-0.775452	1.21954
	6.05923	3.98589	0.111568	3.60549	3.59255	3.16202	2.6798	2.14887	2.19577	3.94457	3.27028	2.71903	2.37276			6.05923	3.98589	-0.404079	1.92738	1.97689	1.40134	2.10579	1.63654	1.79649	1.70468	2.50415	1.51801	1.62819			6.05923	3.98589	-0.631134	1.63644	0.851665	1.12839	1.09351	1.46167	0.897495	0.588142	1.64861	0.987568	0.817646			6.05923	3.98589	-0.767467	1.25703
	6.06947	4.19319	0.130363	3.89654	3.82512	3.46699	2.82127	2.29357	2.33384	4.25735	3.52335	2.83857	2.65903			6.06947	4.19319	-0.417164	1.92432	2.0285	1.43497	2.1615	1.72767	1.77579	1.74567	2.61036	1.48479	1.64481			6.06947	4.19319	-0.674534	1.70232	1.00392	1.1019	1.04625	1.44674	0.984638	0.669205	1.76358	1.02565	0.844913			6.06947	4.19319	-0.777981	1.22973
	6.07971	4.42604	0.101055	4.04933	4.01289	3.79937	2.99907	2.40381	2.42827	4.52831	3.81012	2.95984	2.93922			6.07971	4.42604	-0.421734	1.89513	2.04562	1.50909	2.24853	1.83299	1.79665	1.90639	2.71448	1.52713	1.61066			6.07971	4.42604	-0.691391	1.78982	0.991772	1.07881	0.948132	1.47609	1.01549	0.72628	1.85668	1.05976	1.01572			6.07971	4.42604	-0.793739	1.28909
	6.08995	4.71399	0.104244	4.41562	4.29386	3.97894	3.15448	2.49678	2.41375	4.93664	4.16564	3.18651	3.06146			6.08995	4.71399	-0.395859	1.96636	2.1609	1.6535	2.35658	1.84381	1.83141	2.00534	2.95121	1.6121	1.6852			6.08995	4.71399	-0.69202	1.80412	0.911255	1.07573	1.14486	1.48262	1.0046	0.804722	1.83509	1.16242	1.14794			6.08995	4.71399	-0.80938	1.2612
	6.10019	5.02219	0.111931	4.61143	4.65817	4.30368	3.32812	2.68349	2.52886	5.2095	4.43801	3.39712	3.31461			6.10019	5.02219	-0.402603	2.11058	2.25244	1.76997	2.37056	1.92183	1.94072	2.00286	2.92488	1.65517	1.6848			6.10019	5.02219	-0.713783	1.77425	0.958057	1.12485	1.13895	1.56162	0.971382	0.834419	1.86725	1.14029	1.23995			6.10019	5.02219	-0.825661	1.32273
	6.11043	5.30023	0.110062	4.81227	4.86237	4.58235	3.52318	2.95393	2.67357	5.45767	4.72894	3.59185	3.58752			6.11043	5.30023	-0.449028	2.07733	2.35404	1.75495	2.39185	2.0144	1.9967	2.10917	3.05205	1.69691	1.771			6.11043	5.30023	-0.750069	1.81887	0.971111	1.21432	1.06691	1.5966	1.10101	0.830032	1.91338	1.15273	1.14988			6.11043	5.30023	-0.843174	1.41526
	6.12067	5.61504	0.0782394	5.12516	5.11285	4.82588	3.77576	3.18581	2.72549	5.76423	5.11115	3.86829	3.87943			6.12067	5.61504	-0.458176	2.10178	2.42426	1.78741	2.46309	2.12436	2.14324	2.20891	3.31783	1.64534	1.74564			6.12067	5.61504	-0.751995	1.74974	1.01432	1.26801	1.12611	1.63952	1.21933	0.845516	2.00978	1.18491	1.13017			6.12067	5.61504	-0.843651	1.49359
	6.13091	5.9464	0.0817795	5.44159	5.38935	5.10046	4.04774	3.5605	2.83723	6.02094	5.40714	4.11205	4.20656			6.13091	5.9464	-0.475327	2.01935	2.56597	1.84097	2.41356	2.16612	2.18415	2.29832	3.4958	1.60436	1.77335			6.13091	5.9464	-0.734077	1.76254	1.0436	1.28428	1.07099	1.71665	1.28701	0.869499	2.04331	1.15791	1.17662			6.13091	5.9464	-0.853981	1.51185
	6.14115	6.27742	0.0919647	5.75975	5.71614	5.3578	4.32372	3.87834	2.98512	6.35392	5.71102	4.2563	4.47582			6.14115	6.27742	-0.479359	2.05093	2.60422	1.47183	2.46276	2.14689	2.25129	2.39869	3.54518	1.59237	1.86211			6.14115	6.27742	-0.767403	1.88469	1.03637	1.30601	1.08976	1.74922	1.21293	0.858856	2.01561	1.21733	1.27501			6.14115	6.27742	-0.860035	1.53426
	6.15139	6.61702	0.0837631	6.01369	5.89816	5.65307	4.63347	4.12687	3.09185	6.67681	6.00745	4.53278	4.74811			6.15139	6.61702	-0.496819	2.08728	2.67161	1.42992	2.52342	2.30537	2.35569	2.44995	3.66863	1.66566	1.7999			6.15139	6.61702	-0.775452	1.88702	1.08356	1.24108	1.19998	1.71156	1.31629	0.952614	2.0217	1.22699	1.23249			6.15139	6.61702	-0.861588	1.52927
	6.16163	6.9742	0.0805244	6.37081	6.35688	5.9608	4.91066	4.43159	3.17982	7.01882	6.36874	4.98074	4.95219			6.16163	6.9742	-0.532661	2.0877	2.80449	1.64186	2.64996	2.364	2.43141	2.55476	3.8102	1.73823	1.84332			6.16163	6.9742	-0.767467	1.89524	1.12774	1.29977	1.15534	1.74203	1.36841	0.936924	2.07217	1.17478	1.19769			6.16163	6.9742	-0.87542	1.58717
	6.17187	7.3581	0.0830078	6.65826	6.70442	6.28005	5.2796	4.72654	3.21396	7.45705	6.57023	5.25451	5.31528			6.17187	7.3581	-0.525639	2.14238	3.02761	1.798	2.80805	2.43293	2.47096	2.70307	4.03219	1.84475	1.95011			6.17187	7.3581	-0.777981	1.85675	1.11874	1.42602	1.05213	1.85579	1.29757	0.97562	2.10767	1.10938	1.25665			6.17187	7.3581	-0.890118	1.6797
	6.18211	7.74597	0.0645103	6.97789	6.82513	6.5135	5.52027	5.03194	3.37224	7.79057	6.90336	5.46873	5.59859			6.18211	7.74597	-0.545174	2.19967	3.17287	1.92595	2.78996	2.53561	2.55151	2.75956	4.26029	1.83064	1.9144			6.18211	7.74597	-0.793739	1.81046	1.16241	1.51735	1.11835	1.75725	1.31865	1.00149	2.14053	1.21698	1.35146			6.18211	7.74597	-0.901386	1.65855
	6.19235	8.14888	0.0857162	7.34024	7.14099	6.92233	5.77934	5.4201	3.54012	8.10395	7.20778	5.72778	5.90268			6.19235	8.14888	-0.537323	2.16076	3.33744	2.00891	2.87909	2.64357	2.61118	2.95749	4.49482	1.80484	1.9705			6.19235	8.14888	-0.80938	1.87513	1.24069	1.45414	1.19477	1.84976	1.43975	0.952721	2.27736	1.27901	1.22432			6.19235	8.14888	-0.921726	1.72004
	6.20259	8.56207	0.0718117	7.69892	7.50468	7.36638	6.08422	5.75028	3.73482	8.43193	7.64456	5.96312	6.22218			6.20259	8.56207	-0.568226	2.1989	3.40714	1.95439	2.97754	2.69363	2.67222	3.12516	4.73576	1.84047	2.02371			6.20259	8.56207	-0.825661	1.92271	1.13115	1.36319	1.15093	1.95459	1.54107	0.88525	2.2932	1.30812	1.23322			6.20259	8.56207	-0.927738	1.78979
	6.21283	8.97403	0.0800781	8.11421	7.97609	7.75132	6.36695	6.0002	3.94374	8.81635	7.88833	6.23548	6.49857			6.21283	8.97403	-0.587105	2.25157	3.50283	1.97527	2.99199	2.71288	2.92739	3.21395	4.94389	1.83793	2.00513			6.21283	8.97403	-0.843174	1.91817	1.1861	1.3894	1.17841	2.01726	1.58646	0.949909	2.2925	1.37094	1.35416			6.21283	8.97403	-0.913818	1.7654
	6.22307	9.3752	0.0394135	8.41393	8.33521	8.03294	6.72461	6.29199	4.16146	9.15958	8.32145	6.56552	6.85865			6.22307	9.3752	-0.595161	2.27876	3.65895	2.03922	3.12706	2.87262	3.07882	3.34306	5.33492	1.87946	2.10369			6.22307	9.3752	-0.843651	1.92622	1.23379	1.40454	1.13261	2.00702	1.49134	0.883736	2.29409	1.44484	1.3989			6.22307	9.3752	-0.918999	1.72855
	6.23331	9.81289	0.0130577	8.62854	8.55188	8.37611	7.10039	6.58328	4.35634	9.3883	8.78408	6.8742	7.19456			6.23331	9.81289	-0.585213	2.27125	3.75393	2.04709	3.13667	2.98145	3.16148	3.54055	5.57164	1.92416	2.18483			6.23331	9.81289	-0.853981	1.83986	1.22924	1.40896	1.12431	2.05686	1.42479	0.884201	2.42458	1.41915	1.36558			6.23331	9.81289	-0.9627	1.70275
	6.24355	10.2143	0.00403595	9.01049	9.00063	8.74219	7.42241	6.81854	4.49398	9.65728	9.04627	7.06514	7.42659			6.24355	10.2143	-0.617779	2.32887	3.93772	2.10866	3.23024	3.00674	3.17218	3.6858	5.85882	1.86399	2.1838			6.24355	10.2143	-0.860035	1.89307	1.29029	1.46872	1.21008	2.14322	1.54744	0.940144	2.44345	1.42612	1.40628			6.24355	10.2143	-0.952213	1.83609
	6.25379	10.6277	-0.0263405	9.37905	9.36058	9.02033	7.76496	7.13407	4.98331	10.0861	9.43997	7.47197	7.58501			6.25379	10.6277	-0.631134	2.40049	4.08488	2.05512	3.3272	3.14693	3.24581	3.75917	6.00587	1.87233	2.18414			6.25379	10.6277	-0.861588	1.9966	1.35383	1.51931	1.21516	2.14691	1.64428	0.907757	2.47138	1.4087	1.49199			6.25379	10.6277	-0.960415	1.88653
	6.26403	11.0375	0.0119362	9.80728	9.63341	9.41862	8.13739	7.41318	5.19672	10.3683	9.80006	7.77137	7.97421			6.26403	11.0375	-0.674534	2.44879	4.2176	2.07806	3.40603	3.19114	3.31893	3.99476	6.29063	1.89845	2.24117			6.26403	11.0375	-0.87542	2.02694	1.35223	1.56588	1.23151	2.22185	1.53199	0.952557	2.56079	1.45277	1.48636			6.26403	11.0375	-0.973969	1.9214
	6.27427	11.4428	0.0162354	10.1834	9.91457	9.75001	8.46439	7.75723	5.45151	10.6251	10.1581	8.13124	8.38985			6.27427	11.4428	-0.691391	2.43918	4.36832	2.07578	3.51448	3.29644	3.45869	4.15724	6.59663	2.00539	2.26466			6.27427	11.4428	-0.890118	1.97934	1.39416	1.53197	1.24298	2.37255	1.65219	1.08427	2.67823	1.5175	1.40683			6.27427	11.4428	-1.00312	1.9132
	6.28451	11.8483	0.0082283	10.5504	10.2236	10.0384	8.82051	8.05409	5.69195	10.9603	10.4785	8.51667	8.71066			6.28451	11.8483	-0.69202	2.3886	4.65517	2.08824	3.59428	3.40791	3.58914	4.32168	6.83196	2.0091	2.32061			6.28451	11.8483	-0.901386	1.98117	1.30236	1.54426	1.28254	2.43793	1.71323	1.03915	2.6218	1.56767	1.43845			6.28451	11.8483	-0.982136	1.92862
	6.29475	12.2401	0.00394058	10.9131	10.522	10.3475	9.18105	8.35106	5.9352	11.2848	10.8235	8.82076	8.92779			6.29475	12.2401	-0.713783	2.49902	4.82957	2.1887	3.7404	3.5527	3.76227	4.64589	7.10576	1.95325	2.29939			6.29475	12.2401	-0.921726	1.98146	1.34984	1.56753	1.28016	2.50631	1.74084	0.978672	2.6619	1.5006	1.5126			6.29475	12.2401	-1.02143	2.02314
	6.30499	12.6429	0.000816345	11.1788	10.8376	10.783	9.55686	8.7879	6.24701	11.5354	11.2218	9.21272	9.2989			6.30499	12.6429	-0.750069	2.4065	5.05762	2.25786	3.91532	3.68916	3.8602	4.92344	7.42212	1.9179	2.24233			6.30499	12.6429	-0.927738	2.09445	1.31963	1.53647	1.22511	2.51331	1.74555	0.928047	2.75244	1.41225	1.49957			6.30499	12.6429	-1.04291	1.96556
	6.31523	13.0194	-0.0413322	11.5153	11.1742	11.0879	9.86964	9.06678	6.49229	11.8508	11.5095	9.54166	9.63636			6.31523	13.0194	-0.751995	2.43118	5.27278	2.25875	3.95195	3.92949	4.02384	5.19733	7.68008	1.95993	2.24677			6.31523	13.0194	-0.913818	2.07084	1.34209	1.61216	1.31228	2.50864	1.777	1.02893	2.84572	1.5029	1.56337			6.31523	13.0194	-1.04636	1.96339
	6.32547	13.3984	-0.0100975	11.7861	11.4315	11.3709	10.2711	9.2554	6.79279	12.088	11.6231	9.84584	9.93364			6.32547	13.3984	-0.734077	2.54598	5.52343	2.20057	4.12107	4.10005	4.22046	5.4039	7.93412	1.96969	2.29901			6.32547	13.3984	-0.918999	1.94863	1.4388	1.61481	1.29664	2.62979	1.85287	1.13372	2.90809	1.58051	1.61882			6.32547	13.3984	-1.07398	2.08322
	6.33571	13.742	0.0217896	12.0473	11.6481	11.6572	10.5207	9.55991	7.07858	12.2916	11.9452	10.1696	10.1891			6.33571	13.742	-0.767403	2.52361	5.73793	2.10704	4.28084	4.27448	4.3707	5.63533	8.23808	1.95824	2.27674			6.33571	13.742	-0.9627	1.99008	1.44701	1.65272	1.27671	2.76134	1.84466	1.14246	2.8907	1.55611	1.55371			6.33571	13.742	-1.0637	2.17373
	6.34595	14.0794	0.0389709	12.3169	11.9147	11.9838	10.8083	10.0283	7.39191	12.5629	12.3222	10.4745	10.5522			6.34595	14.0794	-0.775452	2.51379	5.98156	2.1306	4.43292	4.52085	4.64189	5.91444	8.60952	2.01384	2.22408			6.34595	14.0794	-0.952213	1.9878	1.47541	1.64433	1.18631	2.78944	1.82143	1.0319	2.88064	1.55053	1.47622			6.34595	14.0794	-1.06438	2.10458
	6.35619	14.4208	-0.01334	12.6211	12.2365	12.2414	11.193	10.301	7.62825	12.6844	12.5691	10.7811	10.8908			6.35619	14.4208	-0.767467	2.44455	6.27523	2.22671	4.62104	4.77482	4.94368	6.24655	8.97737	1.93583	2.29226			6.35619	14.4208	-0.960415	2.04564	1.48264	1.64287	1.29397	2.73246	1.8266	1.00425	3.05252	1.47413	1.48601			6.35619	14.4208	-1.06425	2.11657
	6.36643	14.7138	-0.00298309	12.826	12.5091	12.3967	11.5204	10.5833	7.82537	12.9956	12.7887	11.0725	11.3265			6.36643	14.7138	-0.777981	2.41727	6.54157	2.22006	4.80363	4.98178	5.23524	6.48297	9.20619	2.00671	2.3408			6.36643	14.7138	-0.973969	2.08436	1.4892	1.61063	1.33165	2.87181	1.88938	1.03706	3.02723	1.56893	1.48926			6.36643	14.7138	-1.08575	2.23276
	6.37667	15.0122	-0.0172386	13.0706	12.6924	12.7178	11.7815	10.8502	8.182	13.2062	12.9768	11.3026	11.4729			6.37667	15.0122	-0.793739	2.49102	6.77974	2.24449	4.90722	5.21516	5.38538	6.69205	9.49796	2.04903	2.29205			6.37667	15.0122	-1.00312	2.06774	1.53121	1.56247	1.2669	2.90469	1.83025	1.12332	3.05002	1.51122	1.50989			6.37667	15.0122	-1.09555	2.29181
	6.38691	15.3002	-0.00152206	13.2278	12.9061	12.9432	12.0416	11.2232	8.52463	13.3178	13.16	11.5061	11.6664			6.38691	15.3002	-0.80938	2.46574	7.11705	2.23531	5.06645	5.59497	5.60269	6.94699	9.86569	1.93459	2.27852			6.38691	15.3002	-0.982136	2.14669	1.6345	1.61107	1.33697	3.01107	1.83913	1.07597	3.1199	1.55647	1.45148			6.38691	15.3002	-1.09674	2.27643
	6.39715	15.5596	0.0253525	13.4382	13.0605	13.0767	12.295	11.5178	8.72551	13.3895	13.3101	11.8491	11.9578			6.39715	15.5596	-0.825661	2.48331	7.33897	2.22129	5.26713	5.7458	5.80962	7.14222	10.2015	1.97283	2.32833			6.39715	15.5596	-1.02143	2.06759	1.52298	1.68959	1.31986	3.07637	1.93421	1.05048	3.18939	1.51531	1.45003			6.39715	15.5596	-1.10569	2.31194
	6.40739	15.7976	0.0226173	13.6884	13.2038	13.1759	12.5118	11.8012	9.04883	13.4967	13.5268	12.1345	12.2311			6.40739	15.7976	-0.843174	2.46221	7.60554	2.25364	5.41387	6.00542	6.14061	7.48193	10.4808	1.97552	2.37532			6.40739	15.7976	-1.04291	2.00444	1.55642	1.67339	1.35069	3.00572	1.96349	1.01543	3.28693	1.62024	1.50837			6.40739	15.7976	-1.12134	2.29576
	6.41763	15.9971	-0.00704193	13.8281	13.4263	13.3525	12.7308	12.0847	9.35622	13.6956	13.6974	12.3164	12.4122			6.41763	15.9971	-0.843651	2.44899	7.7626	2.1995	5.69564	6.19931	6.39193	7.82693	10.7784	2.02397	2.42727			6.41763	15.9971	-1.04636	2.06939	1.6735	1.68117	1.32998	3.08931	1.91502	0.996853	3.37654	1.5971	1.45346			6.41763	15.9971	-1.13197	2.3321
	6.42787	16.2164	-0.0426064	13.9432	13.4906	13.4088	13.0988	12.2364	9.7667	13.6816	13.7466	12.4417	12.5462			6.42787	16.2164	-0.853981	2.41287	8.09463	2.12344	6.04046	6.38889	6.67597	8.2025	11.0551	2.10424	2.35881			6.42787	16.2164	-1.07398	2.08148	1.68127	1.60846	1.30612	3.2555	1.90032	1.05587	3.57694	1.51844	1.43321			6.42787	16.2164	-1.14742	2.3354
	6.43811	16.3885	-0.0265923	14.0871	13.6031	13.6021	13.2303	12.5248	10.1031	13.6977	13.887	12.5749	12.7657			6.43811	16.3885	-0.860035	2.39429	8.37493	2.17211	6.21976	6.64465	6.91464	8.42978	11.2379	2.07896	2.32414			6.43811	16.3885	-1.0637	2.01867	1.58163	1.64579	1.35051	3.41996	1.87922	1.11524	3.6104	1.61378	1.49423			6.43811	16.3885	-1.14525	2.31097
	6.44835	16.5381	-0.0474701	14.162	13.632	13.5893	13.3648	12.8138	10.5013	13.7355	13.9874	12.8073	12.8593			6.44835	16.5381	-0.861588	2.40513	8.67107	2.21142	6.44408	6.8936	7.15771	8.75616	11.5042	2.01816	2.39006			6.44835	16.5381	-1.06438	1.92282	1.57191	1.59734	1.3504	3.46109	1.83697	1.14106	3.63261	1.61352	1.54728			6.44835	16.5381	-1.1712	2.37626
	6.45859	16.7021	-0.0637817	14.3114	13.8272	13.7537	13.6021	13.0064	10.7559	13.8152	13.9946	12.9833	13.0445			6.45859	16.7021	-0.87542	2.38724	8.95513	2.12828	6.67506	7.187	7.40643	9.0644	11.7368	2.1241	2.42789			6.45859	16.7021	-1.06425	1.96278	1.57875	1.79728	1.34379	3.7191	1.78378	1.09898	3.80833	1.5789	1.51459			6.45859	16.7021	-1.13822	2.32824
	6.46883	16.8311	-0.0796471	14.4173	13.9362	13.8541	13.707	13.0498	10.9854	13.7793	13.9993	13.293	13.1367			6.46883	16.8311	-0.890118	2.41539	9.22421	2.13386	6.93462	7.34853	7.73598	9.41374	12.0607	2.11848	2.47806			6.46883	16.8311	-1.08575	2.09101	1.56964	2.1519	1.41306	3.66216	1.86394	1.10194	3.9622	1.53221	1.44238			6.46883	16.8311	-1.1655	2.24352
	6.47907	16.9262	-0.118576	14.3858	13.928	13.9137	13.86	13.2952	11.1637	13.7982	13.9858	13.4659	13.1439			6.47907	16.9262	-0.901386	2.38754	9.54319	2.12907	7.10379	7.54941	8.08926	9.6959	12.2588	2.07507	2.44681			6.47907	16.9262	-1.09555	2.08577	1.5624	2.02142	1.40655	3.74898	1.87779	1.14606	4.06581	1.57425	1.53881			6.47907	16.9262	-1.17313	2.26936
	6.48931	16.9781	-0.128941	14.4617	13.8441	13.9367	13.9668	13.4925	11.5191	13.8134	14.0678	13.6531	13.2707			6.48931	16.9781	-0.921726	2.38391	9.91013	2.06988	7.484	7.87576	8.25938	9.83387	12.419	1.99947	2.38796			6.48931	16.9781	-1.09674	1.93168	1.51182	1.81797	1.31228	3.9818	1.85574	1.08484	4.15828	1.61201	1.54937			6.48931	16.9781	-1.16857	2.17577
	6.49955	17.0326	-0.151752	14.4129	13.8585	13.9723	14.1137	13.563	11.7557	13.8325	13.9166	13.8008	13.3425			6.49955	17.0326	-0.927738	2.44872	10.1538	2.01203	7.7242	8.25079	8.47485	10.1661	12.5544	1.94369	2.43861			6.49955	17.0326	-1.10569	1.97329	1.51242	1.59758	1.28539	4.08394	1.79204	1.04764	4.27359	1.69724	1.51811			6.49955	17.0326	-1.18163	2.20691
	6.50979	17.0866	-0.189507	14.4296	13.964	13.9321	14.2393	13.6734	12.0007	13.7998	13.9579	13.8141	13.4289			6.50979	17.0866	-0.913818	2.51701	10.4224	2.11871	8.01213	8.50631	8.7567	10.4908	12.6815	1.88	2.43267			6.50979	17.0866	-1.12134	2.02689	1.56435	1.61166	1.30706	4.22395	1.71929	1.08129	4.36192	1.68037	1.41938			6.50979	17.0866	-1.19549	2.23902
	6.52003	17.0992	-0.212605	14.4291	13.9901	13.914	14.3139	13.7075	12.1619	13.8361	13.9591	13.8942	13.3819			6.52003	17.0992	-0.918999	2.3739	10.7623	2.15808	8.24237	8.78397	9.09617	10.7211	12.892	1.90891	2.41056			6.52003	17.0992	-1.13197	2.0135	1.56983	1.60353	1.34811	4.32836	1.76165	1.14529	4.48083	1.63275	1.51363			6.52003	17.0992	-1.18435	2.32755
	6.53027	17.0975	-0.22884	14.4351	13.9975	13.9703	14.286	13.7897	12.3861	13.753	13.9575	13.8661	13.4299			6.53027	17.0975	-0.9627	2.40455	11.0482	2.20354	8.43927	9.08355	9.41123	11.0217	13.0343	1.88232	2.46139			6.53027	17.0975	-1.14742	1.94559	1.53638	1.60674	1.36674	4.50579	1.83592	1.20546	4.46479	1.62821	1.55207			6.53027	17.0975	-1.18814	2.38858
	6.54051	17.0727	-0.220291	14.4271	13.9306	13.9042	14.3937	13.8875	12.6191	13.7181	13.8746	13.9362	13.4532			6.54051	17.0727	-0.952213	2.41511	11.3604	2.16021	8.76699	9.40939	9.66728	11.2654	13.1125	1.8323	2.45754			6.54051	17.0727	-1.14525	2.01875	1.57387	1.59341	1.37679	4.60468	1.93923	1.13883	4.62922	1.57098	1.48048			6.54051	17.0727	-1.22463	2.44189
	6.55075	17.0411	-0.238701	14.3286	13.9385	13.8412	14.4716	13.9385	12.7276	13.593	13.872	13.9674	13.4027			6.55075	17.0411	-0.960415	2.47661	11.5394	2.15287	9.11285	9.65866	10.0498	11.5424	13.2288	1.84187	2.46687			6.55075	17.0411	-1.1712	1.96585	1.53097	1.58998	1.38992	4.80143	1.97787	1.09168	4.87045	1.58953	1.42519			6.55075	17.0411	-1.2401	2.39189
	6.56099	16.9454	-0.243465	14.3493	13.8454	13.7356	14.4228	13.9312	12.9427	13.5007	13.8071	13.9434	13.4242			6.56099	16.9454	-0.973969	2.46162	11.8275	2.15813	9.33723	9.93363	10.3199	11.7206	13.3589	1.84871	2.39673			6.56099	16.9454	-1.13822	1.89553	1.47041	1.5733	1.34627	5.01731	1.90728	1.11307	4.96045	1.68462	1.47683			6.56099	16.9454	-1.27366	2.3056
	6.57123	16.8984	-0.250969	14.3306	13.8529	13.6747	14.3836	13.9705	13.0898	13.4576	13.6684	13.8865	13.436			6.57123	16.8984	-1.00312	2.4682	12.0809	2.02015	9.60277	10.2369	10.6058	11.8955	13.4113	1.79141	2.4172			6.57123	16.8984	-1.1655	1.97685	1.52093	1.49747	1.30992	5.26556	1.8783	1.09972	5.12679	1.75984	1.53617			6.57123	16.8984	-1.2761	2.3413
	6.58147	16.8408	-0.258938	14.2691	13.8619	13.6969	14.4059	13.9843	13.2324	13.4188	13.6085	13.8813	13.3212			6.58147	16.8408	-0.982136	2.45626	12.304	1.97313	9.8928	10.515	10.9161	12.139	13.5379	1.76287	2.40013			6.58147	16.8408	-1.17313	1.97256	1.57777	1.57684	1.27244	5.51573	1.92466	1.08129	5.21833	1.65071	1.49258			6.58147	16.8408	-1.29582	2.40022
	6.59171	16.7314	-0.294373	14.119	13.7158	13.6567	14.3597	13.8899	13.4178	13.2906	13.5194	14.0197	13.3141			6.59171	16.7314	-1.02143	2.45106	12.5218	2.00179	10.0925	10.8092	11.0815	12.2869	13.6078	1.83303	2.35748			6.59171	16.7314	-1.16857	1.9769	1.5689	1.5347	1.3175	5.78039	1.91665	1.02285	5.29824	1.63626	1.41092			6.59171	16.7314	-1.30197	2.40369
	6.60195	16.6342	-0.306831	14.0056	13.633	13.6233	14.3411	13.8506	13.4149	13.0592	13.3868	13.9803	13.2214			6.60195	16.6342	-1.04291	2.38506	12.8185	2.10121	10.3366	11.0314	11.3344	12.5203	13.5764	1.86151	2.34672			6.60195	16.6342	-1.18163	1.89822	1.46758	1.55323	1.35402	5.90667	1.76781	1.07814	5.53196	1.62079	1.43372			6.60195	16.6342	-1.2961	2.41241
	6.61219	16.5321	-0.285767	13.9315	13.5314	13.5393	14.2589	13.7154	13.5486	12.8886	13.3412	13.8612	13.1739			6.61219	16.5321	-1.04636	2.38618	12.9894	2.05195	10.6602	11.2555	11.5914	12.6509	13.5689	1.7912	2.36264			6.61219	16.5321	-1.19549	1.89663	1.50112	1.45324	1.3203	6.165	1.76928	1.05519	5.72312	1.54878	1.4428			6.61219	16.5321	-1.29048	2.34288
	6.62243	16.4027	-0.313881	13.8102	13.3953	13.4405	14.1956	13.718	13.5467	12.7699	13.3085	13.7632	12.9921			6.62243	16.4027	-1.07398	2.28337	13.1284	1.97008	10.8884	11.4942	11.8698	12.8347	13.5956	1.72812	2.45803			6.62243	16.4027	-1.18435	1.91398	1.4235	1.45078	1.34519	6.5047	1.79402	1.00582	5.96253	1.56839	1.47602			6.62243	16.4027	-1.3176	2.29867
	6.63267	16.2562	-0.344841	13.7802	13.2758	13.2015	14.1638	13.7455	13.6427	12.7342	13.1335	13.7821	12.9101			6.63267	16.2562	-1.0637	2.265	13.2194	1.91956	11.082	11.727	12.133	12.8783	13.6694	1.71181	2.42931			6.63267	16.2562	-1.18814	1.77299	1.37281	1.45824	1.34341	6.77797	1.81935	1.03153	6.1235	1.51106	1.43414			6.63267	16.2562	-1.33926	2.334
	6.64291	16.111	-0.346107	13.5943	13.1128	13.1921	14.1017	13.7057	13.6286	12.6921	13.0969	13.6821	12.9455			6.64291	16.111	-1.06438	2.28454	13.4099	1.8652	11.3609	12.0043	12.4693	13.0579	13.7023	1.69436	2.38129			6.64291	16.111	-1.22463	1.79642	1.28893	1.42738	1.33187	6.94327	1.74892	0.995911	6.34	1.53603	1.35771			6.64291	16.111	-1.33255	2.34079
	6.65315	15.9464	-0.38409	13.424	13.0284	13.0956	14.0161	13.633	13.6557	12.5215	13.0051	13.5924	12.7188			6.65315	15.9464	-1.06425	2.28949	13.5572	1.89214	11.6205	12.1008	12.7179	13.3245	13.5337	1.70611	2.45163			6.65315	15.9464	-1.2401	1.73562	1.14724	1.44403	1.25972	7.13384	1.89254	1.00434	6.57447	1.55613	1.38424			6.65315	15.9464	-1.3077	2.30025
	6.66339	15.8192	-0.404079	13.315	12.8621	12.9236	13.8101	13.5377	13.6214	12.2981	12.9207	13.5037	12.6548			6.66339	15.8192	-1.08575	2.3214	13.672	1.79235	11.8913	12.2875	12.7897	13.4414	13.5886	1.6627	2.39991			6.66339	15.8192	-1.27366	1.76598	1.25853	1.41493	1.28009	7.42489	1.80122	1.02612	6.77479	1.53312	1.36229			6.66339	15.8192	-1.31016	2.25805
	6.67363	15.6523	-0.417164	13.2579	12.7644	12.8139	13.7351	13.3385	13.6469	12.0698	12.8459	13.383	12.5531			6.67363	15.6523	-1.09555	2.346	13.7646	1.73569	12.1121	12.4828	12.9638	13.3054	13.523	1.71207	2.35583			6.67363	15.6523	-1.2761	1.81876	1.27208	1.391	1.33273	7.61475	1.80497	1.06585	7.06792	1.48671	1.36899			6.67363	15.6523	-1.34575	2.34933
	6.68387	15.4559	-0.421734	13.1277	12.7122	12.6588	13.6742	13.3038	13.6105	11.8958	12.6843	13.3285	12.3826			6.68387	15.4559	-1.09674	2.20287	13.8919	1.80227	12.2432	12.607	13.0693	13.2895	13.5047	1.61458	2.35526			6.68387	15.4559	-1.29582	1.83352	1.17107	1.38375	1.33842	7.89564	1.74903	0.991524	7.21007	1.48175	1.37376			6.68387	15.4559	-1.38796	2.37921
	6.69411	15.2666	-0.395859	12.9456	12.5707	12.5551	13.4915	13.2401	13.6528	11.8412	12.5213	13.23	12.1806			6.69411	15.2666	-1.10569	2.13409	13.9593	1.76622	12.3977	12.785	13.2279	13.3394	13.4068	1.53872	2.37153			6.69411	15.2666	-1.30197	1.82372	1.1667	1.30643	1.29845	8.1514	1.72119	1.01045	7.32472	1.49169	1.38774			6.69411	15.2666	-1.37186	2.31131
	6.70435	15.0772	-0.402603	12.8543	12.4296	12.4014	13.4065	13.1118	13.7473	11.6954	12.4191	13.1168	12.0895			6.70435	15.0772	-1.12134	2.10449	14.0633	1.72028	12.5757	12.8883	13.3912	13.3297	13.3417	1.55758	2.32181			6.70435	15.0772	-1.2961	1.74276	1.24382	1.30565	1.22468	8.42776	1.72377	1.02394	7.52621	1.52482	1.33213			6.70435	15.0772	-1.40203	2.364
	6.71459	14.9068	-0.449028	12.6998	12.3396	12.1825	13.3312	13.0646	13.6285	11.5478	12.2105	12.9995	12.001			6.71459	14.9068	-1.13197	2.13556	14.0615	1.65424	12.8221	13.158	13.5679	13.4107	13.1763	1.54269	2.22694			6.71459	14.9068	-1.29048	1.70013	1.16504	1.20982	1.07275	8.6985	1.6799	1.09093	7.75299	1.52314	1.33862			6.71459	14.9068	-1.4209	2.39497
	6.72483	14.7117	-0.458176	12.6526	12.2237	12.0758	13.2463	12.9667	13.6389	11.3738	12.1557	12.9155	11.8784			6.72483	14.7117	-1.14742	2.16676	13.958	1.68413	12.9467	13.2842	13.6685	13.4213	13.1346	1.46205	2.26887			6.72483	14.7117	-1.3176	1.69852	1.15253	1.28065	1.03218	8.92736	1.72009	1.04976	7.93491	1.38141	1.34079			6.72483	14.7117	-1.41624	2.29233
	6.73507	14.5061	-0.475327	12.3997	12.1486	12.007	13.0465	12.795	13.6275	11.1945	12.0673	12.772	11.6687			6.73507	14.5061	-1.14525	2.1615	13.9898	1.58632	13.1339	13.3236	13.7784	13.497	13.0239	1.4162	2.24855			6.73507	14.5061	-1.33926	1.69273	1.21466	1.2929	1.12097	9.24099	1.64936	1.06889	8.15659	1.39586	1.27716			6.73507	14.5061	-1.4113	2.25082
	6.74531	14.3241	-0.479359	12.2165	11.9744	11.8668	12.9002	12.6204	13.5637	11.0763	11.9013	12.6122	11.6064			6.74531	14.3241	-1.1712	2.18732	14.0344	1.63457	13.2966	13.2924	13.8318	13.3873	12.824	1.4165	2.20299			6.74531	14.3241	-1.33255	1.5751	1.17323	1.22005	1.17309	9.50475	1.64492	1.01392	8.41332	1.44025	1.2656			6.74531	14.3241	-1.41308	2.20333
	6.75555	14.1412	-0.496819	12.1208	11.8124	11.7638	12.695	12.4598	13.564	11.0421	11.7745	12.488	11.3727			6.75555	14.1412	-1.13822	2.07352	14.0807	1.63297	13.5033	13.2726	13.8913	13.2527	12.7197	1.30491	2.23519			6.75555	14.1412	-1.3077	1.54948	1.04879	1.13646	1.14207	9.86928	1.58324	0.997196	8.64898	1.31842	1.27461			6.75555	14.1412	-1.44247	2.15574
	6.76579	13.9447	-0.532661	11.8925	11.7125	11.5922	12.5103	12.3445	13.501	10.8916	11.6079	12.4496	11.2386			6.76579	13.9447	-1.1655	2.07552	13.9197	1.64191	13.5703	13.3615	13.9524	13.2086	12.6433	1.2977	2.20269			6.76579	13.9447	-1.31016	1.54081	1.07628	1.13445	1.06773	10.2281	1.6102	1.03736	8.9259	1.35551	1.31081			6.76579	13.9447	-1.44863	2.13892
	6.77603	13.782	-0.525639	11.8178	11.5746	11.4409	12.5684	12.2709	13.4312	10.6829	11.4913	12.3103	11.1551			6.77603	13.782	-1.17313	2.10387	13.9016	1.56757	13.6608	13.5183	13.8813	13.2131	12.501	1.32837	2.10877			6.77603	13.782	-1.34575	1.55452	1.09066	1.14609	1.06137	10.4594	1.54259	0.950348	9.18559	1.35434	1.26777			6.77603	13.782	-1.44473	2.20188
	6.78627	13.6149	-0.545174	11.6898	11.3654	11.3985	12.4121	12.166	13.2881	10.6489	11.3491	12.0742	11.0268			6.78627	13.6149	-1.16857	2.04148	13.8999	1.49601	13.6755	13.4749	13.9769	13.24	12.3339	1.32483	2.05381			6.78627	13.6149	-1.38796	1.52951	1.00821	1.14588	1.03001	10.7205	1.47868	0.988541	9.52553	1.32965	1.20858			6.78627	13.6149	-1.4679	2.15244
	6.79651	13.3819	-0.537323	11.4644	11.2971	11.2807	12.3051	12.034	13.1713	10.5721	11.1941	12.0017	11			6.79651	13.3819	-1.18163	2.01528	13.8869	1.49054	13.8199	13.4781	13.9896	13.1115	12.1873	1.26618	2.09737			6.79651	13.3819	-1.37186	1.48413	0.996361	1.06584	0.953171	11.031	1.41854	0.931049	9.78318	1.30389	1.25154			6.79651	13.3819	-1.45985	2.1944
	6.80675	13.1136	-0.568226	11.49	11.2066	11.066	12.1372	11.9216	13.1008	10.3873	11.0444	11.8688	10.8946			6.80675	13.1136	-1.19549	2.01522	13.7902	1.42068	13.7798	13.5028	13.9747	13.0631	11.9768	1.22488	2.04574			6.80675	13.1136	-1.40203	1.46185	0.977394	1.08911	1.06113	11.2182	1.45102	0.94458	10.048	1.28888	1.26814			6.80675	13.1136	-1.43895	2.07471
	6.81699	12.9291	-0.587105	11.3589	10.9521	10.8564	12.0421	11.8737	12.9757	10.265	10.8718	11.7303	10.7708			6.81699	12.9291	-1.18435	2.0227	13.7992	1.35426	13.7579	13.4692	13.9107	12.8722	11.7964	1.17943	2.01128			6.81699	12.9291	-1.4209	1.37813	0.936733	0.996235	0.977898	11.5207	1.48987	0.936535	10.3028	1.2083	1.23747			6.81699	12.9291	-1.47568	2.07342
	6.82723	12.7524	-0.595161	11.0696	10.8559	10.6575	11.8668	11.6968	12.9079	10.1389	10.7549	11.542	10.4735			6.82723	12.7524	-1.18814	2.07132	13.6417	1.31411	13.7818	13.4263	13.9583	12.7475	11.71	1.20799	2.01738			6.82723	12.7524	-1.41624	1.30178	0.830647	0.924232	0.887096	11.812	1.40822	1.00745	10.5827	1.2047	1.19082			6.82723	12.7524	-1.43928	2.04252
	6.83747	12.5337	-0.585213	10.9164	10.8145	10.6309	11.7613	11.5072	12.734	9.98942	10.5608	11.428	10.3351			6.83747	12.5337	-1.22463	1.93351	13.3884	1.37634	13.716	13.296	13.8451	12.6878	11.6926	1.14506	1.94308			6.83747	12.5337	-1.4113	1.34216	0.779339	0.949585	0.935101	12.1411	1.40145	1.0353	10.8071	1.24691	1.16888			6.83747	12.5337	-1.47634	2.05012
	6.84771	12.3558	-0.617779	10.8427	10.7279	10.4896	11.687	11.4121	12.5886	9.78728	10.3652	11.4093	10.239			6.84771	12.3558	-1.2401	1.83625	13.3113	1.37687	13.7834	13.2885	13.902	12.5517	11.5349	1.11716	2.01848			6.84771	12.3558	-1.41308	1.26461	0.70356	0.877033	0.946327	12.3999	1.52739	0.970436	10.9967	1.1319	1.08903			6.84771	12.3558	-1.46682	2.01958
	6.85795	12.1679	-0.631134	10.6692	10.5235	10.2618	11.503	11.277	12.4139	9.79474	10.1968	11.2455	10.2401			6.85795	12.1679	-1.27366	1.89389	13.1777	1.33302	13.6777	13.1834	13.8542	12.432	11.377	1.11725	1.96628			6.85795	12.1679	-1.44247	1.35913	0.727577	0.880493	0.837349	12.5115	1.39292	0.924446	11.3101	1.10904	1.10643			6.85795	12.1679	-1.46108	1.98368
	6.86819	11.9636	-0.674534	10.4646	10.4518	10.1588	11.398	11.1374	12.3085	9.62938	10.0876	11.0325	10.201			6.86819	11.9636	-1.2761	1.88109	13.0989	1.17786	13.6992	13.1681	13.7436	12.341	11.2676	1.16431	1.91381			6.86819	11.9636	-1.44863	1.31167	0.795734	0.853565	0.751152	12.7127	1.30384	0.979496	11.4976	1.0845	1.09821			6.86819	11.9636	-1.472	1.98524
	6.87843	11.7909	-0.691391	10.2715	10.2388	10.0959	11.2763	11.0538	12.2301	9.55276	9.99503	10.946	10.0573			6.87843	11.7909	-1.29582	1.79353	12.9331	1.07445	13.6604	13.1851	13.5776	12.1924	11.047	1.09841	1.95946			6.87843	11.7909	-1.44473	1.28367	0.762268	0.84988	0.738739	12.846	1.29195	1.01044	11.6649	1.0927	1.15029			6.87843	11.7909	-1.47217	1.95913
	6.88867	11.5944	-0.69202	10.206	10.0402	9.9401	11.1417	10.8457	12.1054	9.44209	9.87967	10.859	9.96304			6.88867	11.5944	-1.30197	1.80251	12.8243	1.03719	13.6183	13.0517	13.4074	12.014	10.9171	1.14071	1.96525			6.88867	11.5944	-1.4679	1.23813	0.782574	0.868618	0.808167	12.998	1.34463	0.910069	11.9347	1.0745	1.17084			6.88867	11.5944	-1.50834	1.92691
	6.89891	11.4122	-0.713783	10.1633	9.90233	9.77789	11.0574	10.6432	11.9985	9.36271	9.80611	10.6515	9.9023			6.89891	11.4122	-1.2961	1.73654	12.7664	1.09425	13.6313	12.8806	13.3113	11.8671	10.7863	1.12335	1.86508			6.89891	11.4122	-1.45985	1.28136	0.879917	0.896194	0.800987	13.0713	1.35724	0.952579	12.105	1.04084	1.10181			6.89891	11.4122	-1.46786	1.88498
	6.90915	11.2272	-0.750069	10.0224	9.9354	9.65327	10.9723	10.5879	11.8562	9.30564	9.62758	10.5423	9.75056			6.90915	11.2272	-1.29048	1.62341	12.5869	1.13096	13.562	12.7913	13.2101	11.6654	10.6818	1.07356	1.81939			6.90915	11.2272	-1.43895	1.27533	0.775524	0.903301	0.818226	13.3185	1.26269	0.952873	12.3511	1.02062	1.16103			6.90915	11.2272	-1.47519	1.91573
	6.91939	11.0298	-0.751995	10.2948	9.78111	9.50587	10.9205	10.452	11.783	9.15097	9.60243	10.4663	9.62999			6.91939	11.0298	-1.3176	1.68871	12.5481	1.13821	13.4709	12.6408	13.0207	11.5011	10.5128	1.03591	1.83097			6.91939	11.0298	-1.47568	1.23175	0.624557	0.831417	0.795685	13.4629	1.27742	0.864445	12.5578	0.981308	1.0491			6.91939	11.0298	-1.46913	1.86964
	6.92963	10.8535	-0.734077	10.1069	9.67373	9.43143	10.7744	10.3494	11.7797	9.01146	9.3766	10.2652	9.57699			6.92963	10.8535	-1.33926	1.63867	12.4109	1.04745	13.3346	12.4652	12.9149	11.4388	10.4012	0.977406	1.8185			6.92963	10.8535	-1.43928	1.15388	0.686726	0.878967	0.836815	13.5438	1.25742	0.842819	12.6419	0.962559	0.962334			6.92963	10.8535	-1.48812	1.92073
	6.93987	10.679	-0.767403	9.7366	9.55022	9.30916	10.6315	10.2569	11.5862	8.8265	9.32553	10.1274	9.41144			6.93987	10.679	-1.33255	1.57769	12.1364	0.995541	13.1464	12.3417	12.8559	11.2623	10.3316	0.878746	1.75448			6.93987	10.679	-1.47634	1.20092	0.669071	0.801495	0.878014	13.608	1.2813	0.906288	12.8195	0.954929	0.948719			6.93987	10.679	-1.49232	1.855
	6.95011	10.5009	-0.775452	9.58897	9.4146	9.22121	10.5508	10.2478	11.3403	8.68327	9.2667	9.98493	9.26072			6.95011	10.5009	-1.3077	1.56763	11.9649	0.976791	13.5038	12.1669	12.806	11.1259	10.3017	0.832672	1.72804			6.95011	10.5009	-1.46682	1.18447	0.554333	0.695671	0.806892	13.8163	1.18608	0.913391	12.9507	0.857067	1.00647			6.95011	10.5009	-1.50523	1.76371
	6.96035	10.29	-0.767467	9.50609	9.16636	9.10862	10.293	10.1533	11.2273	8.70969	9.15903	9.90635	9.09496			6.96035	10.29	-1.31016	1.47647	11.9263	0.833416	13.3585	11.9411	12.6825	10.9046	10.0617	0.867138	1.70651			6.96035	10.29	-1.46108	1.14933	0.575172	0.670841	0.747528	13.9159	1.14424	0.912273	13.1634	0.850071	0.961643			6.96035	10.29	-1.51186	1.80091
	6.97059	10.0991	-0.777981	9.35443	9.06689	8.94157	10.2571	9.96187	11.0451	8.601	9.07445	9.79855	8.995			6.97059	10.0991	-1.34575	1.4909	11.8749	0.832821	12.9751	11.7767	12.4773	10.8304	9.89169	0.817642	1.73			6.97059	10.0991	-1.472	1.12238	0.562664	0.672222	0.746239	13.9079	1.16345	0.914001	13.2681	0.812855	1.0244			6.97059	10.0991	-1.501	1.70347
	6.98083	9.94798	-0.793739	9.28286	9.02673	8.85923	10.2295	9.81462	10.9032	8.50313	8.89853	9.70705	8.98552			6.98083	9.94798	-1.38796	1.52426	11.695	0.733185	12.7702	11.7441	12.2926	10.7378	9.69241	0.760372	1.63621			6.98083	9.94798	-1.47217	1.06705	0.578438	0.613438	0.66198	14.0199	1.14891	0.779213	13.4568	0.781406	1.09159			6.98083	9.94798	-1.48903	1.76464
	6.99107	9.79291	-0.80938	9.21911	8.93661	8.69149	9.97257	9.65551	10.7251	8.37439	8.90226	9.62836	8.93501			6.99107	9.79291	-1.37186	1.43302	11.4755	0.773232	12.5738	11.6127	12.0761	10.5149	9.48912	0.809963	1.57482			6.99107	9.79291	-1.50834	1.08159	0.599609	0.607624	0.672695	13.9327	1.11382	0.774601	13.5962	0.766609	1.06719			6.99107	9.79291	-1.49589	1.74841
	7.00131	9.61789	-0.825661	9.12102	8.76726	8.59145	9.90513	9.57364	10.6633	8.29293	8.81629	9.58382	8.76291			7.00131	9.61789	-1.40203	1.35736	11.2829	0.77874	12.494	11.512	11.8698	10.1749	9.38696	0.737461	1.61327			7.00131	9.61789	-1.46786	1.03852	0.501644	0.568642	0.626301	13.9255	1.01717	0.853565	13.6335	0.791443	0.9874			7.00131	9.61789	-1.51104	1.75658
	7.01155	9.472	-0.843174	8.94191	8.59363	8.53305	9.73795	9.40129	10.5344	8.19828	8.59218	9.44942	8.61365			7.01155	9.472	-1.4209	1.34484	11.2352	0.733997	12.3764	11.4336	11.7586	10.0317	9.2053	0.665539	1.49449			7.01155	9.472	-1.47519	0.96389	0.49612	0.488152	0.621887	13.921	1.08067	0.786507	13.6238	0.794006	0.903969			7.01155	9.472	-1.50163	1.67303
	7.02179	9.303	-0.843651	8.81805	8.52463	8.39002	9.646	9.28836	10.4639	7.97968	8.44625	9.27949	8.56689			7.02179	9.303	-1.41624	1.30935	11.0051	0.701897	12.1313	11.2178	11.5906	9.97859	9.08616	0.629036	1.49746			7.02179	9.303	-1.46913	0.959614	0.397358	0.520813	0.54631	13.9144	1.03467	0.768269	13.7728	0.776783	0.890545			7.02179	9.303	-1.49858	1.59572
	7.03203	9.13496	-0.853981	8.69742	8.53551	8.31242	9.59105	9.14233	10.3135	7.90209	8.42443	9.20125	8.4672			7.03203	9.13496	-1.4113	1.27865	10.8628	0.715652	12.0185	11.0769	11.4463	9.79848	8.99791	0.655598	1.53735			7.03203	9.13496	-1.48812	0.938919	0.397598	0.509598	0.522221	13.8958	1.02486	0.76442	13.8444	0.685253	0.894051			7.03203	9.13496	-1.51008	1.6056
	7.04227	8.95539	-0.860035	8.52241	8.57128	8.16878	9.44252	9.07801	10.2289	7.77172	8.31816	9.13034	8.3621			7.04227	8.95539	-1.41308	1.34976	10.7194	0.663853	11.9434	10.9178	11.2956	9.69499	8.84454	0.572212	1.47753			7.04227	8.95539	-1.49232	0.973515	0.31831	0.524487	0.583828	13.9172	1.03364	0.75462	13.8632	0.570408	0.953236			7.04227	8.95539	-1.52666	1.58543
	7.05251	8.7998	-0.861588	8.47813	8.36406	8.06917	9.28013	8.99491	10.0478	7.67553	8.20857	8.97325	8.22129			7.05251	8.7998	-1.44247	1.38287	10.4966	0.583149	11.7627	10.8074	11.1863	9.57799	8.65186	0.592335	1.45208			7.05251	8.7998	-1.50523	0.986732	0.337311	0.542725	0.632618	13.884	0.912064	0.75753	13.7035	0.661461	0.926819			7.05251	8.7998	-1.55182	1.48205
	7.06275	8.66193	-0.87542	8.49969	8.13367	8.00328	9.14495	8.85617	9.89989	7.55159	8.0624	8.93093	8.19189			7.06275	8.66193	-1.44863	1.27808	10.3849	0.56348	11.5731	10.5545	11.0504	9.44153	8.47469	0.531326	1.3493			7.06275	8.66193	-1.51186	1.00041	0.321709	0.386765	0.649464	13.8105	0.818722	0.702538	13.8069	0.673546	0.949913			7.06275	8.66193	-1.55124	1.43626
	7.07299	8.48857	-0.890118	8.42281	7.94653	7.7935	9.10005	8.62833	9.79403	7.4851	7.98812	8.88749	8.10913			7.07299	8.48857	-1.44473	1.24726	10.1577	0.557819	11.3959	10.3601	10.8659	9.22773	8.42452	0.55825	1.33515			7.07299	8.48857	-1.501	0.844837	0.227066	0.366463	0.624035	13.783	0.741238	0.680973	13.8031	0.702358	0.85936			7.07299	8.48857	-1.54985	1.46815
	7.08323	8.30191	-0.901386	8.35987	7.95889	7.63848	9.07195	8.63505	9.73374	7.55581	7.87413	8.75643	7.98774			7.08323	8.30191	-1.4679	1.31986	10.0014	0.477161	11.181	10.1358	10.7036	9.03151	8.34032	0.504433	1.37566			7.08323	8.30191	-1.48903	0.807262	0.140759	0.336246	0.61507	13.6933	0.80941	0.644543	13.8015	0.623955	0.831116			7.08323	8.30191	-1.56253	1.42137
	7.09347	8.15937	-0.921726	8.29538	7.81722	7.56172	8.86256	8.61817	9.62031	7.48821	7.75267	8.5764	7.81308			7.09347	8.15937	-1.45985	1.22465	9.95419	0.389885	11.0629	10.0489	10.555	9.03214	8.13141	0.535522	1.32141			7.09347	8.15937	-1.49589	0.852909	0.0969276	0.413525	0.628613	13.6536	0.816864	0.591911	13.8296	0.513855	0.842125			7.09347	8.15937	-1.54296	1.46121
	7.10371	8.02168	-0.927738	8.123	7.60544	7.45767	8.75383	8.40761	9.49364	7.36838	7.78306	8.45909	7.68886			7.10371	8.02168	-1.43895	1.14473	9.83459	0.439766	10.9149	9.95644	10.381	8.92886	7.99416	0.497684	1.29691			7.10371	8.02168	-1.51104	0.897514	0.113949	0.323738	0.532196	13.6376	0.789112	0.63361	13.871	0.487591	0.778713			7.10371	8.02168	-1.54694	1.42015
	7.11395	7.85963	-0.913818	7.88997	7.51531	7.41404	8.75765	8.31899	9.40017	7.30694	7.65712	8.33905	7.59536			7.11395	7.85963	-1.47568	1.13718	9.68046	0.39257	10.7626	9.69169	10.1781	8.76086	7.87982	0.434456	1.21165			7.11395	7.85963	-1.50163	0.927998	0.148281	0.29763	0.506985	13.4347	0.831551	0.642994	13.7808	0.53587	0.86451			7.11395	7.85963	-1.55777	1.36489
	7.12419	7.70507	-0.918999	7.77512	7.41455	7.25995	8.5872	8.17681	9.3025	7.14385	7.58912	8.21822	7.51968			7.12419	7.70507	-1.43928	1.13409	9.53524	0.463547	10.5661	9.61926	10.1351	8.56673	7.75306	0.285858	1.25323			7.12419	7.70507	-1.49858	0.972881	0.170631	0.26701	0.446808	13.3088	0.826099	0.530899	13.7333	0.496353	0.802723			7.12419	7.70507	-1.55178	1.3376
	7.13443	7.55154	-0.9627	7.70693	7.49824	7.20166	8.4941	7.99926	9.23796	7.03038	7.64065	8.16438	7.39299			7.13443	7.55154	-1.47634	1.13232	9.29427	0.385895	10.4221	9.53135	9.96417	8.39722	7.59211	0.258549	1.2898			7.13443	7.55154	-1.51008	0.91906	0.168129	0.222363	0.495552	13.2082	0.778347	0.523029	13.6498	0.48455	0.611271			7.13443	7.55154	-1.56797	1.28323
	7.14467	7.40355	-0.952213	7.59418	7.35216	7.16235	8.41019	7.97974	9.18156	6.93774	7.51247	8.09134	7.25794			7.14467	7.40355	-1.46682	1.08824	9.1343	0.251484	10.2679	9.37807	9.80613	8.30659	7.44834	0.252575	1.18223			7.14467	7.40355	-1.52666	0.948917	0.154243	0.24934	0.480427	13.0406	0.807693	0.55381	13.5446	0.512207	0.570923			7.14467	7.40355	-1.56838	1.25031
	7.15491	7.2677	-0.960415	7.41441	7.12234	7.02042	8.25889	7.89129	9.06786	6.8451	7.25637	7.9849	7.2211			7.15491	7.2677	-1.46108	0.999641	9.03289	0.155952	10.1617	9.15404	9.61898	8.15625	7.25807	0.262508	1.10195			7.15491	7.2677	-1.55182	0.888168	0.0986443	0.227772	0.519882	12.94	0.854614	0.49596	13.4764	0.511242	0.670319			7.15491	7.2677	-1.55302	1.2193
	7.16515	7.1218	-0.973969	7.37744	6.9257	6.88699	8.24427	7.78132	8.9147	6.87608	7.17392	7.83906	7.20388			7.16515	7.1218	-1.472	0.992767	8.96198	0.300076	10.0195	8.98605	9.532	7.88066	7.11234	0.254089	1.0907			7.16515	7.1218	-1.55124	0.88406	0.106918	0.251091	0.585808	12.8391	0.777287	0.529491	13.4036	0.494099	0.738014			7.16515	7.1218	-1.56937	1.12855
	7.17539	6.98121	-1.00312	7.25145	6.92445	6.74545	8.04368	7.75727	8.74707	6.72224	7.19545	7.79942	7.07126			7.17539	6.98121	-1.47217	0.981331	8.84159	0.292088	9.80316	8.82803	9.43487	7.70216	7.12125	0.139984	1.05374			7.17539	6.98121	-1.54985	0.836479	0.0812416	0.230278	0.561153	12.7365	0.767155	0.415421	13.2705	0.410316	0.728718			7.17539	6.98121	-1.56399	1.13221
	7.18563	6.85319	-0.982136	7.09985	6.93806	6.64074	7.96043	7.68304	8.65095	6.59205	7.07756	7.67284	6.7984			7.18563	6.85319	-1.50834	0.965237	8.66277	0.205566	9.63348	8.6287	9.25663	7.64627	6.94509	0.104053	1.0042			7.18563	6.85319	-1.56253	0.859798	0.0431747	0.247753	0.535118	12.5093	0.603645	0.39035	13.1417	0.349751	0.622311			7.18563	6.85319	-1.57638	1.11746
	7.19587	6.71227	-1.02143	6.98873	6.85012	6.54141	7.96202	7.49134	8.4579	6.54319	7.0714	7.66151	6.8378			7.19587	6.71227	-1.46786	0.883007	8.49076	0.163128	9.41777	8.64603	9.08141	7.55311	6.8072	0.128372	0.991898			7.19587	6.71227	-1.54296	0.922741	-0.034481	0.107601	0.466858	12.3558	0.613884	0.421368	12.9911	0.278736	0.574627			7.19587	6.71227	-1.5607	1.15934
	7.20611	6.59002	-1.04291	6.96074	6.6433	6.46774	7.89388	7.36107	8.36797	6.47424	7.08063	7.48751	6.86274			7.20611	6.59002	-1.47519	0.833416	8.3063	0.0986328	9.3056	8.41045	9.03024	7.49139	6.65164	0.0649529	0.964729			7.20611	6.59002	-1.54694	0.903465	-0.101357	0.149166	0.511349	12.2159	0.630993	0.468281	12.9018	0.270439	0.641098			7.20611	6.59002	-1.53278	1.08538
	7.21635	6.46303	-1.04636	6.9044	6.59472	6.41875	7.72176	7.29636	8.3423	6.3384	6.95068	7.36009	6.65915			7.21635	6.46303	-1.46913	0.795834	8.17256	-0.0233269	9.23606	8.24166	8.79379	7.40628	6.49952	0.0212021	0.954952			7.21635	6.46303	-1.55777	0.836361	-0.0814247	0.0973969	0.51247	12.0799	0.744244	0.466373	12.8255	0.245991	0.698975			7.21635	6.46303	-1.55182	1.05294
	7.22659	6.33565	-1.07398	6.78169	6.40471	6.33017	7.5676	7.14272	8.25573	6.25999	6.9066	7.26289	6.55277			7.22659	6.33565	-1.48812	0.765457	8.07059	-0.0431862	9.07976	8.11547	8.61438	7.21792	6.41953	0.0461769	0.892532			7.22659	6.33565	-1.55178	0.834827	-0.128727	0.0672607	0.470699	11.9078	0.739162	0.429893	12.7225	0.315548	0.587994			7.22659	6.33565	-1.53407	0.944073
	7.23683	6.19027	-1.0637	6.70087	6.35382	6.25875	7.52073	6.97223	8.18899	6.20428	6.76141	7.1984	6.43625			7.23683	6.19027	-1.49232	0.821423	7.99387	-0.0687675	8.8956	8.09528	8.50196	6.97126	6.44145	-0.024826	0.872173			7.23683	6.19027	-1.56797	0.821888	-0.080471	-0.0177116	0.537788	11.8099	0.646751	0.380932	12.4589	0.294159	0.565876			7.23683	6.19027	-1.5426	0.997822
	7.24707	6.08965	-1.06438	6.62099	6.3135	6.16172	7.42217	6.91394	8.10585	6.11704	6.71672	7.13985	6.39603			7.24707	6.08965	-1.50523	0.839344	7.78483	-0.153519	8.75164	7.96528	8.41889	6.84892	6.32217	-0.0727692	0.799301			7.24707	6.08965	-1.56838	0.803093	-0.0635529	-0.00149918	0.509453	11.7342	0.626114	0.428249	12.2759	0.222374	0.526505			7.24707	6.08965	-1.54493	0.950485
	7.25731	5.94978	-1.06425	6.43811	6.16128	6.02659	7.29232	6.89732	7.99899	5.93026	6.63572	7.04851	6.29864			7.25731	5.94978	-1.51186	0.798931	7.67831	-0.193581	8.62973	7.83967	8.15542	6.68753	6.08478	-0.0542946	0.790386			7.25731	5.94978	-1.55302	0.770931	-0.191582	0.0880623	0.593006	11.5029	0.689892	0.43335	12.0855	0.216602	0.619854			7.25731	5.94978	-1.55086	0.862709
	7.26755	5.82535	-1.08575	6.34382	6.15546	5.90643	7.23845	6.71808	7.87817	5.80134	6.51348	6.97499	6.24284			7.26755	5.82535	-1.501	0.723171	7.53638	-0.204475	8.53265	7.70873	7.97579	6.58283	5.97716	-0.0235214	0.763573			7.26755	5.82535	-1.56937	0.839878	-0.169258	0.0330582	0.384304	11.3404	0.746292	0.394012	12.0929	0.157204	0.537983			7.26755	5.82535	-1.53366	0.766029
	7.27779	5.75165	-1.09555	6.28257	6.09066	5.90956	7.15773	6.60202	7.83792	5.74137	6.42401	6.81872	6.08478			7.27779	5.75165	-1.48903	0.68573	7.41725	-0.284798	8.28404	7.48446	7.87608	6.47203	5.90958	-0.0954208	0.784245			7.27779	5.75165	-1.56399	0.849949	-0.164906	0.0307693	0.0956497	11.1334	0.707726	0.354065	12.0557	0.123421	0.444069			7.27779	5.75165	-1.50868	0.758068
	7.28803	5.59359	-1.09674	6.22055	6.01492	5.78738	7.0066	6.54897	7.67178	5.64046	6.29366	6.80533	5.8574			7.28803	5.59359	-1.49589	0.567211	7.2071	-0.15181	8.04398	7.35675	7.73262	6.34314	5.87421	-0.155048	0.611271			7.28803	5.59359	-1.57638	0.753143	-0.2332	0.0472183	0.322258	10.9455	0.719551	0.330223	11.8686	0.0443687	0.43198			7.28803	5.59359	-1.5271	0.706902
	7.29827	5.46523	-1.10569	6.15994	5.95553	5.67076	6.88883	6.42437	7.55651	5.53302	6.25752	6.69873	5.81845			7.29827	5.46523	-1.51104	0.466148	7.09	-0.148018	7.98349	7.26179	7.61983	6.24126	5.72837	-0.108807	0.567703			7.29827	5.46523	-1.5607	0.801983	-0.292171	0.00883484	0.480675	10.8666	0.679893	0.297153	11.6661	0.0632172	0.49931			7.29827	5.46523	-1.53713	0.686626
	7.30851	5.37218	-1.12134	6.07141	5.82456	5.60147	6.77815	6.28499	7.32586	5.47486	6.23135	6.64047	5.80946			7.30851	5.37218	-1.50163	0.519371	6.92806	-0.257919	7.86813	7.1708	7.55392	6.19946	5.61615	-0.089962	0.530685			7.30851	5.37218	-1.53278	0.657261	-0.301342	-0.0787125	0.494408	10.7841	0.615044	0.224949	11.5142	0.0254631	0.584511			7.30851	5.37218	-1.52903	0.751556
	7.31875	5.26974	-1.13197	6.07418	5.80069	5.50594	6.61815	6.23248	7.27505	5.37175	6.10041	6.52644	5.79838			7.31875	5.26974	-1.49858	0.609364	6.85965	-0.277542	7.68598	6.9181	7.43618	6.06272	5.47786	-0.249474	0.511627			7.31875	5.26974	-1.55182	0.660206	-0.24691	-0.114414	0.375404	10.6334	0.562767	0.271488	11.4067	-0.0138054	0.582066			7.31875	5.26974	-1.5354	0.675709
	7.32899	5.17931	-1.14742	5.93689	5.58251	5.47243	6.58359	6.07693	7.16871	5.28619	5.97661	6.39548	5.68365			7.32899	5.17931	-1.51008	0.582695	6.77951	-0.337242	7.55581	6.68434	7.25472	5.97117	5.30025	-0.354462	0.415886			7.32899	5.17931	-1.53407	0.680317	-0.31892	-0.121517	0.483643	10.4738	0.5173	0.293766	11.215	0.0272675	0.512917			7.32899	5.17931	-1.54731	0.627605
	7.33923	5.09689	-1.14525	5.90421	5.45507	5.35046	6.51105	6.04312	7.14277	5.09951	5.95247	6.39671	5.50165			7.33923	5.09689	-1.52666	0.559021	6.59782	-0.356613	7.52044	6.62975	7.12417	5.8156	5.26963	-0.305779	0.415173			7.33923	5.09689	-1.5426	0.708488	-0.359928	-0.148167	0.423523	10.2836	0.565666	0.260284	11.0191	0.0561142	0.360672			7.33923	5.09689	-1.53798	0.541557
	7.34947	4.94965	-1.1712	5.67796	5.41668	5.26232	6.40055	6.00546	7.16995	5.02813	5.84838	6.26643	5.45446			7.34947	4.94965	-1.55182	0.543133	6.51622	-0.356197	7.45582	6.62011	7.06788	5.61625	5.1615	-0.323456	0.393501			7.34947	4.94965	-1.54493	0.641739	-0.426304	-0.0459633	0.494705	10.122	0.639149	0.203232	10.7924	0.0821609	0.403145			7.34947	4.94965	-1.54295	0.494328
	7.35971	4.83443	-1.13822	5.5554	5.31759	5.15388	6.30718	5.89893	7.04231	5.04984	5.7337	6.19281	5.42196			7.35971	4.83443	-1.55124	0.514378	6.3593	-0.409016	7.17999	6.40133	6.92692	5.47769	4.98737	-0.484688	0.413528			7.35971	4.83443	-1.55086	0.585941	-0.339329	-0.14497	0.486061	10.0124	0.602489	0.276649	10.6478	0.0845909	0.42762			7.35971	4.83443	-1.57148	0.406773
	7.36995	4.70523	-1.1655	5.51148	5.26804	5.07509	6.12957	5.84902	6.90815	5.01505	5.66931	6.10173	5.32302			7.36995	4.70523	-1.54985	0.479259	6.26243	-0.532112	7.16943	6.28141	6.82421	5.35065	4.91185	-0.465591	0.365929			7.36995	4.70523	-1.53366	0.65905	-0.40572	-0.138794	0.481617	9.87751	0.498505	0.249062	10.446	0.0356827	0.415482			7.36995	4.70523	-1.57347	0.518147
	7.38019	4.61272	-1.17313	5.57887	5.32297	4.96895	6.03634	5.7536	6.73843	4.9176	5.59613	6.0389	5.21577			7.38019	4.61272	-1.56253	0.435116	6.24253	-0.565647	7.05382	6.17805	6.72575	5.22693	4.84143	-0.367363	0.332466			7.38019	4.61272	-1.50868	0.672794	-0.426785	-0.120136	0.490543	9.70728	0.559093	0.223019	10.3569	-0.0927544	0.49807			7.38019	4.61272	-1.56543	0.56514
	7.39043	4.50091	-1.16857	5.53339	5.08782	4.94385	5.978	5.64229	6.67819	4.84209	5.56709	6.0563	5.1729			7.39043	4.50091	-1.54296	0.338379	6.119	-0.523685	6.89741	6.15903	6.5712	5.13173	4.77956	-0.362282	0.388294			7.39043	4.50091	-1.5271	0.747398	-0.474037	-0.124657	0.382732	9.5177	0.510197	0.19928	10.1856	-0.130379	0.542343			7.39043	4.50091	-1.56133	0.490578
	7.40067	4.40131	-1.18163	5.38869	4.9595	4.89902	5.89474	5.63559	6.53385	4.75742	5.53865	5.9705	5.09605			7.40067	4.40131	-1.54694	0.326801	5.8871	-0.606403	6.68966	6.08374	6.46347	4.95457	4.62432	-0.466568	0.236279			7.40067	4.40131	-1.53713	0.721123	-0.3922	-0.115978	0.334084	9.29533	0.531071	0.194649	9.92209	-0.037323	0.509674			7.40067	4.40131	-1.55517	0.428108
	7.41091	4.26001	-1.19549	5.2884	4.85126	4.7574	5.78891	5.59438	6.43772	4.64197	5.42054	5.91973	5.05406			7.41091	4.26001	-1.55777	0.396442	5.7987	-0.627014	6.4497	5.95982	6.27866	4.87119	4.49725	-0.587265	0.242264			7.41091	4.26001	-1.52903	0.675274	-0.49408	-0.200722	0.395226	9.08118	0.57209	0.216915	9.87255	-0.0948753	0.470665			7.41091	4.26001	-1.54755	0.428993
	7.42115	4.17351	-1.18435	5.22364	4.7907	4.66034	5.64853	5.48537	6.36388	4.53096	5.27605	5.84909	4.99425			7.42115	4.17351	-1.55178	0.337212	5.70438	-0.606251	6.40535	5.779	6.11884	4.72911	4.37826	-0.57608	0.27166			7.42115	4.17351	-1.5354	0.574375	-0.554195	-0.185535	0.391258	9.0004	0.51363	0.131641	9.80269	-0.193844	0.46624			7.42115	4.17351	-1.5545	0.379982
	7.43139	4.08447	-1.18814	5.18208	4.62748	4.50195	5.55937	5.36703	6.38741	4.47219	5.17658	5.65418	4.82298			7.43139	4.08447	-1.56797	0.255802	5.57896	-0.696823	6.3177	5.51352	6.0155	4.61665	4.30191	-0.640839	0.198296			7.43139	4.08447	-1.54731	0.556995	-0.562862	-0.259827	0.391735	8.8421	0.455025	0.106846	9.60132	-0.194622	0.461662			7.43139	4.08447	-1.54539	0.272575
	7.44163	3.9809	-1.22463	5.05844	4.66307	4.48503	5.55316	5.23798	6.23906	4.4672	5.14172	5.48061	4.79205			7.44163	3.9809	-1.56838	0.23177	5.44698	-0.687359	6.24433	5.38925	5.91232	4.53657	4.25787	-0.601704	0.191765			7.44163	3.9809	-1.53798	0.728539	-0.623421	-0.205158	0.328564	8.68419	0.494461	0.0717659	9.4144	-0.17247	0.366104			7.44163	3.9809	-1.52608	0.35564
	7.45187	3.91531	-1.2401	5.02658	4.59607	4.54391	5.45142	5.10966	6.14619	4.31921	5.09173	5.42537	4.83743			7.45187	3.91531	-1.55302	0.224472	5.31351	-0.746273	6.02235	5.42564	5.82813	4.47829	4.1722	-0.707905	0.159229			7.45187	3.91531	-1.54295	0.697735	-0.658237	-0.194515	0.280426	8.59381	0.582882	0.0789261	9.31171	-0.103386	0.37748			7.45187	3.91531	-1.52993	0.291767
	7.46211	3.81546	-1.27366	4.93225	4.56776	4.45856	5.37171	5.0873	6.09559	4.26902	4.9665	5.43368	4.72612			7.46211	3.81546	-1.56937	0.266315	5.12894	-0.675842	5.95592	5.37024	5.70631	4.26276	4.03728	-0.817471	0.0995941			7.46211	3.81546	-1.57148	0.639633	-0.703289	-0.230286	0.359844	8.41124	0.576359	0.101997	9.13995	-0.13784	0.324135			7.46211	3.81546	-1.53207	0.144547
	7.47235	3.71328	-1.2761	4.79676	4.57129	4.35035	5.28409	4.92345	6.0373	4.2013	4.95836	5.32644	4.55936			7.47235	3.71328	-1.56399	0.205578	5.08865	-0.807522	5.80308	5.32703	5.62365	4.20284	3.95241	-0.817661	-0.0359726			7.47235	3.71328	-1.57347	0.661411	-0.685848	-0.311028	0.386799	8.29204	0.531368	0.101189	8.95458	-0.273453	0.360851			7.47235	3.71328	-1.54156	0.0799561
	7.48259	3.62161	-1.29582	4.7589	4.55948	4.21478	5.21768	4.92864	5.93119	4.15314	4.92957	5.23138	4.40904			7.48259	3.62161	-1.57638	0.108448	4.99412	-0.843369	5.71858	5.12324	5.48235	4.11061	3.87911	-0.826889	0.0367928			7.48259	3.62161	-1.56543	0.696026	-0.719204	-0.37429	0.310062	8.15372	0.58419	0.0715752	8.7873	-0.219391	0.316673			7.48259	3.62161	-1.54404	0.265602
	7.49283	3.51735	-1.30197	4.626	4.36896	4.21804	5.19124	4.86771	5.72194	4.11696	4.86621	5.17588	4.36849			7.49283	3.51735	-1.5607	0.207748	4.86884	-0.847874	5.58733	4.98947	5.32912	4.00607	3.82405	-0.810448	0.0947609			7.49283	3.51735	-1.56133	0.697399	-0.705605	-0.373543	0.326195	8.09573	0.532726	0.141121	8.71828	-0.194557	0.208035			7.49283	3.51735	-1.56858	0.230495
	7.50307	3.44852	-1.2961	4.47723	4.28912	4.16379	5.05458	4.76816	5.79374	3.91543	4.85998	5.10302	4.40902			7.50307	3.44852	-1.53278	0.174618	4.71981	-0.810631	5.50882	4.78437	5.24694	3.91625	3.77261	-0.826054	0.0858841			7.50307	3.44852	-1.55517	0.702576	-0.685204	-0.361439	0.313759	7.98763	0.508457	0.170589	8.52654	-0.199043	0.147728			7.50307	3.44852	-1.5317	0.0652237
	7.51331	3.37976	-1.29048	4.36378	4.24608	4.08062	4.95083	4.7845	5.65464	3.76196	4.76997	5.0596	4.2724			7.51331	3.37976	-1.55182	0.0640144	4.55309	-0.881897	5.52616	4.63572	5.14139	3.82607	3.55361	-0.820461	0.0142136			7.51331	3.37976	-1.54755	0.495731	-0.800503	-0.373123	0.401154	7.8583	0.513	0.0755081	8.38987	-0.28809	0.145512			7.51331	3.37976	-1.51721	0.091423
	7.52355	3.24611	-1.3176	4.39158	4.17676	3.93572	4.9509	4.5487	5.51851	3.73077	4.68941	4.93637	4.20647			7.52355	3.24611	-1.53407	0.0349541	4.4924	-1.01477	5.35786	4.60751	5.0188	3.75433	3.50636	-0.911369	0.0656433			7.52355	3.24611	-1.5545	0.428562	-0.842625	-0.400318	0.35305	7.72808	0.542667	-0.0210876	8.22964	-0.30938	0.0859146			7.52355	3.24611	-1.50964	0.163872
	7.53379	3.13839	-1.33926	4.35789	4.0518	3.82177	4.81338	4.57705	5.48143	3.8033	4.53368	4.84764	4.09315			7.53379	3.13839	-1.5426	0.0783463	4.38472	-0.991257	5.14449	4.54848	4.8591	3.61732	3.5553	-0.953632	-0.0455246			7.53379	3.13839	-1.54539	0.455536	-0.834026	-0.382172	0.36055	7.57587	0.566288	-0.0742073	8.06152	-0.18742	0.139511			7.53379	3.13839	-1.52322	0.11087
	7.54403	3.08465	-1.33255	4.24026	3.96008	3.80297	4.72619	4.55316	5.3269	3.74363	4.56169	4.85962	4.04062			7.54403	3.08465	-1.54493	0.10445	4.21736	-0.95105	5.07311	4.32409	4.75043	3.56763	3.39543	-0.882259	-0.227566			7.54403	3.08465	-1.52608	0.510681	-0.919228	-0.353142	0.314377	7.47252	0.526493	-0.0917091	7.86447	-0.274586	0.215393			7.54403	3.08465	-1.50877	0.0829391
	7.55427	3.01268	-1.3077	4.26453	3.89346	3.85077	4.71135	4.48808	5.24844	3.65391	4.53156	4.77286	3.97816			7.55427	3.01268	-1.55086	0.0896378	4.20933	-0.965843	4.94363	4.26805	4.63649	3.42625	3.34727	-0.931076	-0.193947			7.55427	3.01268	-1.52993	0.584709	-0.809444	-0.328968	0.320782	7.31262	0.529984	-0.0268936	7.71663	-0.310207	0.132027			7.55427	3.01268	-1.49768	0.121395
	7.56451	2.93485	-1.31016	4.26067	3.76581	3.70977	4.59332	4.5044	5.22946	3.65677	4.40565	4.68512	3.87752			7.56451	2.93485	-1.53366	0.0741882	4.10814	-1.00412	4.86663	4.27947	4.60702	3.30467	3.20926	-0.978214	-0.207218			7.56451	2.93485	-1.53207	0.563553	-0.789726	-0.299068	0.291763	7.22026	0.549454	-0.0168762	7.63436	-0.383522	0.146393			7.56451	2.93485	-1.48507	0.082283
	7.57475	2.84978	-1.34575	4.14182	3.76321	3.54929	4.50984	4.40788	5.14109	3.60058	4.22069	4.5889	3.8151			7.57475	2.84978	-1.50868	0.0928307	4.04402	-1.07206	4.78188	4.20686	4.57024	3.26166	3.16019	-0.975685	-0.260612			7.57475	2.84978	-1.54156	0.4949	-0.901905	-0.325058	0.302505	7.07293	0.445965	-0.0529747	7.59259	-0.393532	0.204865			7.57475	2.84978	-1.50819	-0.0460587
	7.58499	2.73695	-1.38796	4.0309	3.81581	3.50299	4.45609	4.25374	5.04943	3.43339	4.19981	4.46721	3.78141			7.58499	2.73695	-1.5271	0.0358009	3.9936	-1.10625	4.65927	4.07323	4.4318	3.13107	3.12256	-0.989571	-0.243256			7.58499	2.73695	-1.54404	0.516808	-0.925507	-0.515018	0.223171	6.86116	0.411896	-0.118183	7.46548	-0.410137	0.118843			7.58499	2.73695	-1.51362	-0.0511818
	7.59523	2.6768	-1.37186	3.93292	3.77225	3.46008	4.44244	4.16051	4.94193	3.26386	4.13583	4.49866	3.652			7.59523	2.6768	-1.53713	-0.0286827	3.84306	-1.1966	4.45404	3.9722	4.24842	3.04462	2.96295	-1.04566	-0.307499			7.59523	2.6768	-1.56858	0.430477	-0.898518	-0.556992	0.192902	6.75173	0.31815	-0.102924	7.32487	-0.393677	0.00429535			7.59523	2.6768	-1.49121	-0.0366287
	7.60547	2.63162	-1.40203	3.90274	3.68195	3.45954	4.3828	4.17208	4.7865	3.20642	4.02149	4.50231	3.60872			7.60547	2.63162	-1.52903	-0.143337	3.72383	-1.1002	4.31256	3.79208	4.21481	2.81845	2.91554	-1.14635	-0.449406			7.60547	2.63162	-1.5317	0.444103	-0.900558	-0.521275	0.160408	6.71208	0.306061	-0.159897	7.12517	-0.392818	-0.0277367			7.60547	2.63162	-1.47937	-0.0200348
	7.61571	2.58685	-1.4209	3.78919	3.55917	3.41106	4.29493	4.07723	4.76311	3.25002	4.01369	4.30282	3.50677			7.61571	2.58685	-1.5354	-0.131542	3.67543	-1.18792	4.32765	3.63756	4.17789	2.83324	2.8827	-1.13056	-0.475353			7.61571	2.58685	-1.51721	0.460247	-0.922909	-0.531288	0.127243	6.49702	0.362366	-0.221313	7.01461	-0.436592	-0.00442123			7.61571	2.58685	-1.47402	-0.0512924
	7.62595	2.48532	-1.41624	3.69178	3.48685	3.27922	4.25555	4.07614	4.63319	3.22441	3.84324	4.25623	3.50535			7.62595	2.48532	-1.54731	-0.0963783	3.55389	-1.12753	4.226	3.43531	4.04317	2.82716	2.76893	-1.19548	-0.40115			7.62595	2.48532	-1.50964	0.468735	-0.905949	-0.454948	0.269569	6.38848	0.428886	-0.217102	6.88659	-0.486694	0.0196991			7.62595	2.48532	-1.46601	-0.0128822
	7.63619	2.39406	-1.4113	3.73033	3.44007	3.23159	4.23103	4.05846	4.58297	3.15473	3.90585	4.12695	3.47142			7.63619	2.39406	-1.53798	-0.0965576	3.42367	-1.17684	4.16312	3.36584	3.92022	2.65643	2.62417	-1.30199	-0.44939			7.63619	2.39406	-1.52322	0.424709	-0.960186	-0.50449	0.236881	6.26276	0.382259	-0.236359	6.80613	-0.485237	0.00472641			7.63619	2.39406	-1.45681	-0.0445557
	7.64643	2.31622	-1.41308	3.67852	3.38029	3.20065	4.0929	3.99346	4.52979	3.04422	3.89463	4.06685	3.45636			7.64643	2.31622	-1.54295	-0.134262	3.35817	-1.34654	4.05621	3.34967	3.77847	2.59108	2.52042	-1.27367	-0.488823			7.64643	2.31622	-1.50877	0.345074	-1.0394	-0.492062	0.207649	6.18318	0.391869	-0.179504	6.74014	-0.453186	0.0630417			7.64643	2.31622	-1.44362	0.00962448
	7.65667	2.1906	-1.44247	3.60629	3.33557	3.07977	4.00216	3.88818	4.51022	2.97327	3.78229	4.0081	3.47346			7.65667	2.1906	-1.57148	-0.147781	3.23989	-1.36694	3.90166	3.30295	3.67669	2.53083	2.61396	-1.25409	-0.501617			7.65667	2.1906	-1.49768	0.4063	-0.855808	-0.43771	0.144279	6.12223	0.329586	-0.171803	6.54595	-0.499687	0.0490341			7.65667	2.1906	-1.438	-0.0376778
	7.66691	2.1187	-1.44863	3.51353	3.33456	3.0663	3.95474	3.74679	4.50318	2.93391	3.66566	3.88195	3.39873			7.66691	2.1187	-1.57347	-0.252422	3.17575	-1.24438	3.77993	3.21352	3.63717	2.48253	2.51344	-1.21085	-0.490948			7.66691	2.1187	-1.48507	0.407852	-0.906361	-0.443874	0.173187	6.05251	0.253635	-0.123634	6.41871	-0.565147	0.0975876			7.66691	2.1187	-1.44598	-0.0333862
	7.67715	2.07647	-1.44473	3.50497	3.29866	3.11495	4.01054	3.75329	4.39134	2.90684	3.5947	3.90321	3.36456			7.67715	2.07647	-1.56543	-0.28553	3.07402	-1.36213	3.66576	3.01975	3.57057	2.31422	2.26527	-1.17897	-0.55806			7.67715	2.07647	-1.50819	0.37146	-0.88139	-0.473942	0.175858	5.96233	0.264317	-0.236832	6.4279	-0.577831	0.083725			7.67715	2.07647	-1.40332	-0.0112228
	7.68739	2.02112	-1.4679	3.45009	3.20732	3.0359	3.90854	3.68372	4.27178	2.89859	3.53511	3.84022	3.17637			7.68739	2.02112	-1.56133	-0.224113	3.00753	-1.3753	3.63346	2.96741	3.40833	2.26849	2.25096	-1.20594	-0.529118			7.68739	2.02112	-1.51362	0.355793	-0.860752	-0.460781	0.23526	5.81429	0.302773	-0.239109	6.3006	-0.656654	-0.00577927			7.68739	2.02112	-1.38949	-0.0141716
	7.69763	1.94445	-1.45985	3.39356	3.15251	2.98335	3.758	3.65776	4.30175	2.7781	3.48469	3.72289	3.08006			7.69763	1.94445	-1.55517	-0.222561	2.89409	-1.36245	3.57729	2.88639	3.33102	2.14094	2.25473	-1.17899	-0.535236			7.69763	1.94445	-1.49121	0.337471	-0.871792	-0.423588	0.200119	5.59824	0.303406	-0.181911	6.09878	-0.615822	-0.0295334			7.69763	1.94445	-1.41004	-0.146564
	7.70787	1.84117	-1.43895	3.31172	3.12218	2.98915	3.74191	3.54765	4.17918	2.60841	3.39082	3.64656	2.92323			7.70787	1.84117	-1.54755	-0.241493	2.93226	-1.3679	3.42503	2.83125	3.21472	2.09676	2.17252	-1.38202	-0.627869			7.70787	1.84117	-1.47937	0.2169	-0.868038	-0.515648	0.172112	5.48872	0.2948	-0.249432	5.89414	-0.589394	-0.0565872			7.70787	1.84117	-1.4407	-0.175114
	7.71811	1.75467	-1.47568	3.16862	2.96678	2.93025	3.68506	3.43789	4.08026	2.55394	3.35906	3.63613	2.9252			7.71811	1.75467	-1.5545	-0.295242	2.82477	-1.37458	3.28596	2.71605	3.18469	1.94625	2.14674	-1.46364	-0.718399			7.71811	1.75467	-1.47402	0.290596	-0.9174	-0.575649	0.104774	5.30671	0.306408	-0.217411	5.77113	-0.5625	-0.183353			7.71811	1.75467	-1.43261	-0.263294
	7.72835	1.68831	-1.43928	3.19184	2.57957	2.80919	3.65569	3.41076	4.02413	2.56944	3.29786	3.63425	2.94311			7.72835	1.68831	-1.54539	-0.305447	2.73068	-1.35582	3.23458	2.63165	3.05314	1.79987	2.00549	-1.45609	-0.698814			7.72835	1.68831	-1.46601	0.33392	-0.933113	-0.515743	0.0569801	5.27937	0.257832	-0.267384	5.69495	-0.611313	-0.213188			7.72835	1.68831	-1.42523	-0.302013
	7.73859	1.65678	-1.47634	3.20829	2.57003	2.66831	3.56375	3.37938	4.01255	2.46667	3.23547	3.50611	2.90582			7.73859	1.65678	-1.52608	-0.318645	2.71915	-1.36882	3.17808	2.59804	2.90981	1.69346	1.90147	-1.44907	-0.604828			7.73859	1.65678	-1.45681	0.359989	-1.02892	-0.499928	0.091217	5.28292	0.236206	-0.338554	5.515	-0.697479	-0.242863			7.73859	1.65678	-1.40191	-0.366158
	7.74883	1.60701	-1.46682	3.02852	2.72557	2.6827	3.47352	3.29458	3.93516	2.41589	3.18456	3.31504	2.76096			7.74883	1.60701	-1.52993	-0.330647	2.55291	-1.44635	3.13444	2.50717	2.93712	1.68717	1.83171	-1.44127	-0.652737			7.74883	1.60701	-1.44362	0.368263	-1.05592	-0.563896	0.0602951	5.12818	0.338619	-0.357998	5.52291	-0.734909	-0.254864			7.74883	1.60701	-1.40252	-0.370663
	7.75907	1.51456	-1.46108	2.95525	2.80235	2.63758	3.56504	3.22422	3.78235	2.28935	3.07513	3.1721	2.70066			7.75907	1.51456	-1.53207	-0.444386	2.5387	-1.42701	2.97728	2.37295	2.82734	1.61018	1.785	-1.5529	-0.729668			7.75907	1.51456	-1.438	0.257923	-1.08033	-0.548542	0.0615578	5.02773	0.346474	-0.357998	5.34145	-0.706505	-0.207935			7.75907	1.51456	-1.39656	-0.334351
	7.76931	1.468	-1.472	2.96634	2.73561	2.55904	3.43999	3.1182	3.68213	2.25889	3.13719	3.22635	2.71265			7.76931	1.468	-1.54156	-0.46973	2.45878	-1.44675	2.87595	1.88686	2.73917	1.57674	1.73914	-1.60316	-0.697273			7.76931	1.468	-1.44598	0.305965	-1.09849	-0.52285	0.131645	5.02998	0.232868	-0.368759	5.23645	-0.640354	-0.274796			7.76931	1.468	-1.3803	-0.356804
	7.77955	1.3896	-1.47217	2.93015	2.63615	2.55028	3.40339	3.09452	3.64965	2.39099	3.08022	3.19696	2.68048			7.77955	1.3896	-1.54404	-0.451088	2.29023	-1.59893	2.78929	1.89639	2.71336	1.41091	1.65836	-1.63497	-0.721329			7.77955	1.3896	-1.40332	0.366474	-1.12906	-0.493942	0.133324	4.84143	0.0995598	-0.390598	5.18148	-0.658943	-0.270912			7.77955	1.3896	-1.39669	-0.369415
	7.78979	1.3474	-1.50834	2.88748	2.61117	2.47688	3.36913	3.07333	3.61111	2.20947	3.01184	3.16087	2.67824			7.78979	1.3474	-1.56858	-0.420712	2.21517	-1.64157	2.598	2.01653	2.62059	1.37266	1.64957	-1.61709	-0.741585			7.78979	1.3474	-1.38949	0.258053	-1.03491	-0.556133	0.0773315	4.6801	0.177315	-0.388134	5.14105	-0.670219	-0.233231			7.78979	1.3474	-1.39174	-0.270195
	7.80003	1.30431	-1.46786	2.84256	2.6302	2.38058	3.30588	3.03138	3.60995	2.10107	2.87838	3.21835	2.61983			7.80003	1.30431	-1.5317	-0.457176	2.21982	-1.59203	2.59984	2.06675	2.66289	1.27105	1.69967	-1.58554	-0.82098			7.80003	1.30431	-1.41004	0.21249	-1.07914	-0.450321	0.0750999	4.52364	0.155643	-0.474094	5.05091	-0.630699	-0.29332			7.80003	1.30431	-1.41345	-0.331528
	7.81027	1.24068	-1.47519	2.76631	2.53339	2.46878	3.12955	2.90055	3.54615	2.13895	2.93703	3.12393	2.5145			7.81027	1.24068	-1.51721	-0.435505	2.22575	-1.55976	2.58601	2.04721	2.56455	1.2153	1.50793	-1.59925	-0.880833			7.81027	1.24068	-1.4407	0.190857	-1.06303	-0.503838	0.157585	4.5398	0.116413	-0.429787	4.89626	-0.678108	-0.317734			7.81027	1.24068	-1.3898	-0.390739
	7.82051	1.17834	-1.46913	2.61168	2.47747	2.31063	3.00519	2.83609	3.46258	2.1306	2.91649	3.09099	2.52564			7.82051	1.17834	-1.50964	-0.336075	2.18596	-1.64816	2.54256	2.0495	2.47208	1.21733	1.33901	-1.61909	-0.865685			7.82051	1.17834	-1.43261	0.202038	-1.0578	-0.593697	0.193878	4.48615	0.126534	-0.287697	4.82208	-0.839924	-0.313446			7.82051	1.17834	-1.38307	-0.448997
	7.83075	1.1231	-1.48812	2.52132	2.53168	2.19251	3.1007	2.8557	3.38669	2.0654	2.71088	3.04189	2.51292			7.83075	1.1231	-1.52322	-0.316628	2.03772	-1.6643	2.43997	2.03755	2.38251	1.117	1.29967	-1.64452	-0.851006			7.83075	1.1231	-1.42523	0.300037	-1.06274	-0.581715	0.174107	4.37146	0.158813	-0.335373	4.71515	-0.744064	-0.282799			7.83075	1.1231	-1.37712	-0.506752
	7.84099	1.08376	-1.49232	2.50289	2.49397	2.2402	3.03085	2.88068	3.3855	2.02334	2.64939	2.9456	2.48918			7.84099	1.08376	-1.50877	-0.295685	1.91422	-1.63363	2.39087	1.96682	2.25599	1.01306	1.33038	-1.7275	-0.860806			7.84099	1.08376	-1.40191	0.312675	-1.07234	-0.510918	0.0590782	4.30565	0.0978966	-0.292553	4.56977	-0.785873	-0.209866			7.84099	1.08376	-1.39741	-0.518784
	7.85123	0.985443	-1.50523	2.53579	2.3103	2.19183	2.96236	2.72639	3.35572	1.88873	2.56225	2.91229	2.45626			7.85123	0.985443	-1.49768	-0.310501	1.78706	-1.71808	2.29445	1.78095	2.27895	0.840351	1.3209	-1.69577	-0.798737			7.85123	0.985443	-1.40252	0.211895	-1.0638	-0.536285	0.0316505	4.15207	0.102474	-0.373161	4.63492	-0.787292	-0.214775			7.85123	0.985443	-1.41652	-0.453625
	7.86147	0.928898	-1.51186	2.52872	2.19463	2.12777	2.9024	2.62343	3.35496	1.92915	2.55827	2.83075	2.26958			7.86147	0.928898	-1.48507	-0.328445	1.72285	-1.82486	2.1925	1.69261	2.14243	0.767799	1.21584	-1.68787	-0.860008			7.86147	0.928898	-1.39656	0.149826	-1.0821	-0.545704	0.0845642	4.10786	0.133293	-0.35051	4.51167	-0.73856	-0.248283			7.86147	0.928898	-1.40909	-0.534721
	7.87171	0.897297	-1.501	2.46033	2.21674	2.14479	2.87804	2.67223	3.10843	1.88436	2.56927	2.67451	2.20231			7.87171	0.897297	-1.50819	-0.390862	1.66336	-1.80626	2.09803	1.79723	2.07374	0.743935	1.17616	-1.60063	-0.897106			7.87171	0.897297	-1.3803	0.183323	-1.10894	-0.60228	0.0257378	4.07166	0.183956	-0.404022	4.37084	-0.699768	-0.278492			7.87171	0.897297	-1.37848	-0.607437
	7.88195	0.83559	-1.48903	2.38923	2.20174	2.09219	2.71288	2.61851	3.04903	1.74727	2.51414	2.60549	2.23977			7.88195	0.83559	-1.51362	-0.477001	1.70704	-1.65565	2.11998	1.5935	2.12389	0.71666	1.02314	-1.63646	-0.897736			7.88195	0.83559	-1.39669	0.177746	-1.06728	-0.640976	0.00655365	3.93818	0.0896263	-0.414417	4.31203	-0.706909	-0.320015			7.88195	0.83559	-1.37332	-0.60273
	7.89219	0.821945	-1.49589	2.35749	2.02403	2.03346	2.65561	2.50761	2.94524	1.71828	2.49318	2.6438	2.1887			7.89219	0.821945	-1.49121	-0.513172	1.59371	-1.62755	2.08897	1.48417	2.05214	0.660393	0.927296	-1.64877	-0.936897			7.89219	0.821945	-1.39174	0.0809441	-1.23944	-0.570152	0.0409241	3.78032	0.017971	-0.451157	4.24271	-0.728783	-0.432621			7.89219	0.821945	-1.37795	-0.558132
	7.90243	0.742065	-1.51104	2.27362	1.97858	2.00884	2.58937	2.4972	2.98715	1.68781	2.54084	2.63549	2.06362			7.90243	0.742065	-1.47937	-0.545414	1.54276	-1.72849	1.9334	1.52803	1.90271	0.619217	0.885803	-1.62888	-0.867172			7.90243	0.742065	-1.41345	0.0812416	-1.21595	-0.51545	0.0245781	3.73529	0.0702095	-0.311817	4.18786	-0.619461	-0.434742			7.90243	0.742065	-1.38686	-0.623627
	7.91267	0.689068	-1.50163	2.22503	2.06937	1.87311	2.582	2.4356	2.98428	1.62234	2.40422	2.53547	2.04364			7.91267	0.689068	-1.47402	-0.616024	1.44965	-1.74639	1.79927	1.44065	1.85494	0.692406	0.847569	-1.64432	-0.912971			7.91267	0.689068	-1.3898	0.177635	-1.17245	-0.62072	-0.0280647	3.70804	0.115017	-0.376549	3.97839	-0.681267	-0.466938			7.91267	0.689068	-1.36269	-0.60405
	7.92291	0.611786	-1.49858	2.16566	2.10823	1.81152	2.56611	2.43026	2.85941	1.51437	2.27827	2.47694	1.98869			7.92291	0.611786	-1.46601	-0.573956	1.36785	-1.73266	1.77252	1.42172	1.7287	0.602791	0.808338	-1.57661	-0.937019			7.92291	0.611786	-1.38307	0.208035	-1.10411	-0.626289	-0.0992317	3.66044	0.0513268	-0.423477	3.8861	-0.674805	-0.463886			7.92291	0.611786	-1.32909	-0.584587
	7.93315	0.564411	-1.51008	2.17062	2.04243	1.89687	2.56002	2.41317	2.8358	1.46141	2.18428	2.49932	1.95062			7.93315	0.564411	-1.45681	-0.545654	1.4023	-1.79041	1.76246	1.31966	1.67555	0.551617	0.778656	-1.60339	-1.06803			7.93315	0.564411	-1.37712	0.111752	-1.10152	-0.556267	-0.0558243	3.59317	0.0482254	-0.42802	3.80032	-0.689793	-0.548668			7.93315	0.564411	-1.28814	-0.489338
	7.94339	0.522671	-1.52666	2.0883	1.89487	1.8396	2.52918	2.34154	2.73345	1.44451	2.14347	2.47965	1.9138			7.94339	0.522671	-1.44362	-0.551437	1.24282	-1.77867	1.70427	1.2863	1.6166	0.387539	0.724045	-1.66548	-1.05583			7.94339	0.522671	-1.39741	0.138332	-1.07138	-0.505375	0.0333519	3.49441	0.0880432	-0.425922	3.74301	-0.757774	-0.479183			7.94339	0.522671	-1.29868	-0.527081
	7.95363	0.456131	-1.55182	1.95578	1.88303	1.8584	2.35641	2.31808	2.68953	1.39656	2.10419	2.42759	1.88114			7.95363	0.456131	-1.438	-0.548275	1.18341	-1.73951	1.64052	1.22091	1.58271	0.292816	0.604454	-1.69156	-0.925194			7.95363	0.456131	-1.41652	0.0817566	-1.08892	-0.638245	0.0499954	3.35849	0.0618019	-0.439667	3.56446	-0.803375	-0.539085			7.95363	0.456131	-1.31363	-0.594444
	7.96387	0.391071	-1.55124	1.9558	1.82006	1.78899	2.28688	2.26275	2.64191	1.29266	2.08316	2.35384	1.79296			7.96387	0.391071	-1.44598	-0.634369	1.15282	-1.69475	1.53205	1.1179	1.50173	0.228592	0.551323	-1.75213	-0.940594			7.96387	0.391071	-1.40909	-0.0113373	-1.12064	-0.610912	0.0646324	3.32637	0.139549	-0.492355	3.49266	-0.716187	-0.552258			7.96387	0.391071	-1.3316	-0.65213
	7.97411	0.353119	-1.54985	1.88211	1.74722	1.69171	2.26818	2.09425	2.52591	1.3101	1.95866	2.36874	1.73404			7.97411	0.353119	-1.40332	-0.58503	1.05683	-1.80109	1.46556	1.07771	1.46709	0.24688	0.434078	-1.79266	-0.987373			7.97411	0.353119	-1.37848	0.0962753	-1.18884	-0.4799	-0.0439682	3.23812	0.059124	-0.436615	3.4214	-0.791023	-0.532089			7.97411	0.353119	-1.33936	-0.593086
	7.98435	0.327736	-1.56253	1.88547	1.69753	1.61197	2.27937	2.14347	2.54235	1.3675	1.95517	2.23529	1.74612			7.98435	0.327736	-1.38949	-0.548409	0.965107	-1.87353	1.33595	1.03975	1.45575	0.233017	0.530273	-1.77651	-0.988647			7.98435	0.327736	-1.37332	0.0570564	-1.22494	-0.48753	-0.104176	3.26579	0.066761	-0.445877	3.27198	-0.883675	-0.482639			7.98435	0.327736	-1.33893	-0.591049
	7.99459	0.316959	-1.54296	1.9853	1.57282	1.63312	2.14877	2.04652	2.48932	1.22079	1.90236	2.16315	1.75206			7.99459	0.316959	-1.41004	-0.550755	0.833271	-1.86093	1.27779	0.997166	1.34659	0.216209	0.460876	-1.7772	-1.03435			7.99459	0.316959	-1.37795	0.0649567	-1.26582	-0.569508	0.0138245	3.10495	0.0542908	-0.470913	3.17726	-0.868034	-0.41246			7.99459	0.316959	-1.31414	-0.652187
	8.00483	0.255497	-1.54694	1.90359	1.54368	1.59054	1.99544	1.90672	2.37092	1.18351	1.87606	2.11179	1.67368			8.00483	0.255497	-1.4407	-0.527534	0.836849	-1.87938	1.26773	0.931374	1.35169	0.0907173	0.373497	-1.76729	-1.08709			8.00483	0.255497	-1.38686	0.0980873	-1.33033	-0.576412	0.0654106	3.08864	-0.0153275	-0.503578	3.15716	-0.771484	-0.506752			8.00483	0.255497	-1.29576	-0.611099
	8.01507	0.205608	-1.55777	1.78395	1.54781	1.51681	1.96073	1.97106	2.36085	1.16285	1.86152	2.07552	1.58311			8.01507	0.205608	-1.43261	-0.461697	0.777687	-1.94495	1.19625	0.829163	1.22599	-0.0380554	0.353683	-1.79976	-1.09211			8.01507	0.205608	-1.36269	0.0912056	-1.36124	-0.510571	-0.0664024	2.98942	-0.0255318	-0.419113	3.16324	-0.776077	-0.485893			8.01507	0.205608	-1.29287	-0.706421
	8.02531	0.183548	-1.55178	1.68866	1.50596	1.51401	1.92458	2.01692	2.30898	1.04318	1.88623	2.10262	1.58655			8.02531	0.183548	-1.42523	-0.515697	0.760998	-1.81113	1.09205	0.756729	1.13589	0.0428886	0.217762	-1.87233	-1.03407			8.02531	0.183548	-1.32909	0.0373726	-1.3023	-0.562534	-0.0603943	2.92853	-0.00419235	-0.439285	3.09185	-0.862648	-0.541111			8.02531	0.183548	-1.27938	-0.596054
	8.03555	0.113338	-1.56797	1.66493	1.54697	1.5718	2.02295	1.91356	2.1819	1.02306	1.84772	2.00187	1.51676			8.03555	0.113338	-1.40191	-0.512505	0.722836	-1.90398	1.11843	0.672165	1.06548	-0.0146408	0.336678	-1.77995	-1.03448			8.03555	0.113338	-1.28814	0.0886459	-1.28137	-0.59005	-0.0801086	2.78276	0.123482	-0.434303	2.93669	-0.942215	-0.445004			8.03555	0.113338	-1.28789	-0.540344
	8.04579	0.0741768	-1.56838	1.63225	1.53483	1.51317	1.98712	1.86048	2.1543	1.07455	1.80543	1.94817	1.43019			8.04579	0.0741768	-1.40252	-0.592495	0.698639	-1.91479	1.104	0.655396	0.975609	-0.0774269	0.343597	-1.7303	-1.10309			8.04579	0.0741768	-1.29868	0.0157623	-1.3208	-0.628063	-0.0928421	2.77048	0.0580711	-0.354645	2.92469	-0.926933	-0.435219			8.04579	0.0741768	-1.26863	-0.574142
	8.05603	0.0195808	-1.55302	1.48586	1.41941	1.49417	1.91278	1.8478	2.2104	1.08826	1.82663	1.90297	1.43575			8.05603	0.0195808	-1.39656	-0.708626	0.66737	-1.81017	1.04297	0.6642	0.862637	-0.201942	0.312141	-1.70129	-1.04658			8.05603	0.0195808	-1.31363	-0.0909767	-1.34728	-0.562618	-0.100124	2.773	0.0624924	-0.379574	2.88755	-0.907349	-0.464737			8.05603	0.0195808	-1.28135	-0.620956
	8.06627	0.00050354	-1.56937	1.52258	1.37164	1.42304	1.87411	1.82618	2.18304	1.02289	1.74529	1.86779	1.48801			8.06627	0.00050354	-1.3803	-0.667976	0.569584	-1.90771	0.919888	0.628857	0.803177	-0.24593	0.217087	-1.64221	-1.12938			8.06627	0.00050354	-1.3316	-0.0301094	-1.30186	-0.594269	-0.11388	2.75642	-0.03545	-0.387775	2.82683	-0.929665	-0.520264			8.06627	0.00050354	-1.25365	-0.679619
	8.07651	-0.0263672	-1.56399	1.52137	1.27276	1.39864	1.8468	1.83438	2.14451	0.943642	1.5819	1.91138	1.41618			8.07651	-0.0263672	-1.39669	-0.668285	0.482559	-1.87156	0.83215	0.620728	0.823593	-0.207863	0.165096	-1.68191	-1.1677			8.07651	-0.0263672	-1.33936	-0.0396843	-1.26248	-0.629089	-0.190453	2.57738	-0.0550575	-0.367439	2.76318	-0.942455	-0.427925			8.07651	-0.0263672	-1.24775	-0.741261
	8.08675	-0.0714645	-1.57638	1.50229	1.28069	1.38113	1.72705	1.75494	2.0532	0.836678	1.61308	1.7872	1.17059			8.08675	-0.0714645	-1.39174	-0.617085	0.489368	-1.80859	0.833206	0.559296	0.780548	-0.336647	0.106792	-1.81562	-1.16371			8.08675	-0.0714645	-1.33893	-0.0648232	-1.26521	-0.700222	-0.192295	2.82046	-0.0150871	-0.605011	2.71999	-0.982796	-0.482437			8.08675	-0.0714645	-1.22521	-0.817307
	8.09699	-0.0983505	-1.5607	1.37891	1.34995	1.27802	1.6339	1.64522	2.00318	0.881485	1.50745	1.72591	1.14169			8.09699	-0.0983505	-1.41345	-0.710209	0.409737	-1.80487	0.86544	0.518375	0.742531	-0.386169	0.00447083	-1.83627	-1.16344			8.09699	-0.0983505	-1.31414	0.0257759	-1.28678	-0.691353	-0.120796	3.01266	-0.0754662	-0.552906	2.57833	-0.98172	-0.646698			8.09699	-0.0983505	-1.23301	-0.847527
	8.10723	-0.158207	-1.53278	1.39779	1.23779	1.16901	1.66535	1.68073	1.94677	0.926514	1.50911	1.72776	1.17928			8.10723	-0.158207	-1.3898	-0.739384	0.398636	-1.80703	0.811764	0.429325	0.649738	-0.455009	-0.0322418	-1.83695	-1.07273			8.10723	-0.158207	-1.29576	0.0560188	-1.27734	-0.693413	-0.0408287	2.62463	0.0354729	-0.538433	2.43545	-0.926422	-0.602837			8.10723	-0.158207	-1.22234	-0.765999
	8.11747	-0.196594	-1.55182	1.34042	1.12957	1.19431	1.63855	1.65403	1.91982	0.87709	1.52514	1.68507	1.23165			8.11747	-0.196594	-1.38307	-0.741886	0.341431	-1.84595	0.775261	0.305515	0.726284	-0.430714	-0.0126953	-1.825	-1.06516			8.11747	-0.196594	-1.29287	-0.0905647	-1.379	-0.606785	-0.0810242	2.43763	0.0939903	-0.561615	2.37517	-0.945698	-0.632607			8.11747	-0.196594	-1.21701	-0.69191
	8.12771	-0.222984	-1.53407	1.33695	1.09322	1.06609	1.59475	1.63159	1.89223	0.799877	1.36738	1.70054	1.30817			8.12771	-0.222984	-1.37712	-0.759563	0.245045	-1.87296	0.556763	0.316803	0.625778	-0.435459	-0.0102463	-1.84789	-1.11042			8.12771	-0.222984	-1.27938	-0.180851	-1.42213	-0.596424	-0.098835	2.38219	0.0366631	-0.590656	2.31673	-0.935005	-0.55825			8.12771	-0.222984	-1.21574	-0.723309
	8.13795	-0.265404	-1.5426	1.20765	1.10876	0.976562	1.63049	1.55705	1.81897	0.807552	1.30931	1.72527	1.27332			8.13795	-0.265404	-1.39741	-0.66354	0.175358	-1.89887	0.585171	0.346214	0.59103	-0.528824	-0.0395622	-1.8557	-1.1953			8.13795	-0.265404	-1.28789	-0.0171776	-1.31887	-0.633999	-0.0174179	2.33584	-0.037262	-0.595352	2.20335	-0.966011	-0.509449			8.13795	-0.265404	-1.20521	-0.751133
	8.14819	-0.285416	-1.54493	1.1297	1.04402	0.955154	1.48977	1.47084	1.7177	0.77198	1.38644	1.77694	1.14746			8.14819	-0.285416	-1.41652	-0.770092	0.163357	-1.89351	0.598629	0.31823	0.532295	-0.530125	0.0246201	-1.90881	-1.09412			8.14819	-0.285416	-1.26863	-0.108753	-1.27333	-0.650204	-0.125816	2.16167	-0.0897369	-0.58297	2.22623	-0.946381	-0.564163			8.14819	-0.285416	-1.19257	-0.673958
	8.15843	-0.293835	-1.55086	1.19569	1.09872	0.997154	1.45216	1.45978	1.70651	0.680443	1.35794	1.64991	1.07443			8.15843	-0.293835	-1.40909	-0.831577	0.235859	-1.9202	0.489471	0.201469	0.503101	-0.604881	-0.00528717	-1.79202	-1.02636			8.15843	-0.293835	-1.28135	-0.232731	-1.32006	-0.619957	-0.209286	2.11363	-0.13866	-0.600647	2.2002	-0.920986	-0.536961			8.15843	-0.293835	-1.17168	-0.687664
	8.16867	-0.341492	-1.53366	1.26928	1.03805	0.977684	1.48352	1.4157	1.67308	0.654415	1.24375	1.58888	1.03156			8.16867	-0.341492	-1.37848	-0.9147	0.225376	-2.00504	0.453621	0.166061	0.431648	-0.646626	-0.00898361	-1.74128	-1.12986			8.16867	-0.341492	-1.25365	-0.136124	-1.41006	-0.626083	-0.201141	2.07381	-0.125153	-0.521229	2.1292	-0.896477	-0.545212			8.16867	-0.341492	-1.18629	-0.784798
	8.17891	-0.381119	-1.50868	1.2194	1.05979	0.951004	1.44726	1.36115	1.58625	0.641724	1.26395	1.47636	1.05735			8.17891	-0.381119	-1.37332	-0.810608	0.0641594	-1.91873	0.473137	0.118439	0.404682	-0.664879	-0.0788651	-1.79562	-1.14002			8.17891	-0.381119	-1.24775	0.00963593	-1.50751	-0.710976	-0.182274	1.96877	-0.109955	-0.501987	2.01281	-0.955318	-0.565132			8.17891	-0.381119	-1.19364	-0.756344
	8.18915	-0.396461	-1.5271	1.18785	0.997162	0.899841	1.49332	1.3583	1.56361	0.675205	1.23512	1.48293	1.03814			8.18915	-0.396461	-1.37795	-0.83773	-0.0537262	-1.9455	0.427994	0.12833	0.330223	-0.673653	-0.0826683	-1.73677	-1.13596			8.18915	-0.396461	-1.22521	-0.0283585	-1.44957	-0.697277	-0.265015	1.99292	-0.125153	-0.454018	1.93171	-0.908302	-0.518818			8.18915	-0.396461	-1.14674	-0.773781
	8.19939	-0.431442	-1.53713	1.13189	0.90501	0.907372	1.51211	1.31157	1.55666	0.628643	1.1656	1.51015	0.971939			8.19939	-0.431442	-1.38686	-0.766071	0.0585442	-1.92376	0.326305	0.0282097	0.335598	-0.710777	-0.237816	-1.75677	-1.08437			8.19939	-0.431442	-1.23301	-0.200497	-1.40219	-0.622318	-0.183823	1.92458	-0.0964355	-0.511574	1.88051	-0.938488	-0.539085			8.19939	-0.431442	-1.14734	-0.794086
	8.20963	-0.4776	-1.52903	1.05573	0.889767	0.863686	1.45292	1.26644	1.5339	0.52504	1.09459	1.39161	0.846542			8.20963	-0.4776	-1.36269	-0.760746	-0.013813	-1.91874	0.282761	-0.0304184	0.298584	-0.743774	-0.187702	-1.79493	-1.02721			8.20963	-0.4776	-1.22234	-0.105045	-1.44946	-0.714931	-0.200714	1.80791	0.0016861	-0.426674	1.78037	-0.914963	-0.546261			8.20963	-0.4776	-1.16003	-0.765793
	8.21987	-0.508312	-1.5354	1.05831	0.902626	0.886608	1.33134	1.24599	1.39936	0.480934	1.17667	1.40015	0.828529			8.21987	-0.508312	-1.32909	-0.865887	-0.0657158	-1.91363	0.25296	-0.047821	0.181866	-0.715614	-0.251812	-1.73939	-1.06089			8.21987	-0.508312	-1.21701	-0.137135	-1.49041	-0.817574	-0.258354	1.76151	0.00717926	-0.493729	1.70841	-0.84742	-0.592121			8.21987	-0.508312	-1.14523	-0.786621
	8.23011	-0.525238	-1.54731	1.07233	0.808777	0.863758	1.4048	1.22126	1.39152	0.500755	1.23811	1.39986	0.860741			8.23011	-0.525238	-1.28814	-0.783703	-0.14735	-1.9355	0.293118	-0.0830612	0.160946	-0.715137	-0.237381	-1.68892	-1.04136			8.23011	-0.525238	-1.21574	-0.115486	-1.44674	-0.72242	-0.168026	1.6547	0.00838852	-0.59737	1.66704	-0.86969	-0.707932			8.23011	-0.525238	-1.13133	-0.810951
	8.24035	-0.522587	-1.53798	0.960953	0.80687	0.789848	1.37469	1.25977	1.48391	0.423237	1.16087	1.30231	0.831596			8.24035	-0.522587	-1.29868	-0.737236	-0.182796	-2.00791	0.213097	-0.175011	0.12447	-0.785507	-0.25708	-1.78298	-1.01641			8.24035	-0.522587	-1.20521	-0.0648003	-1.43154	-0.777637	-0.13274	1.5779	-0.109623	-0.559898	1.69367	-0.945839	-0.663719			8.24035	-0.522587	-1.13814	-0.799973
	8.25059	-0.546165	-1.54295	0.958054	0.734543	0.734375	1.29838	1.21373	1.49944	0.42717	1.01903	1.27367	0.67897			8.25059	-0.546165	-1.31363	-0.807163	-0.202011	-1.93077	0.241192	-0.205154	0.0502243	-0.827217	-0.335331	-1.79259	-1.07661			8.25059	-0.546165	-1.19257	-0.162243	-1.41696	-0.790462	-0.226761	1.47718	-0.0325737	-0.624359	1.56202	-0.993118	-0.61459			8.25059	-0.546165	-1.14138	-0.790939
	8.26083	-0.571793	-1.57148	0.932747	0.741135	0.757885	1.27554	1.09271	1.33168	0.377872	1.02079	1.32406	0.576424			8.26083	-0.571793	-1.3316	-0.76445	-0.292564	-2.02042	0.232933	-0.154301	0.0820618	-0.858307	-0.289974	-1.75574	-1.13657			8.26083	-0.571793	-1.17168	-0.136242	-1.41352	-0.823544	-0.22271	1.46098	-0.151844	-0.640438	1.48279	-0.964737	-0.589024			8.26083	-0.571793	-1.12934	-0.642498
	8.27107	-0.612534	-1.57347	0.849705	0.698959	0.744987	1.20827	1.12623	1.24768	0.347229	0.993401	1.30441	0.734417			8.27107	-0.612534	-1.33936	-0.740417	-0.270676	-2.03432	0.229309	-0.240501	0.111618	-0.806725	-0.330776	-1.86229	-1.08274			8.27107	-0.612534	-1.18629	-0.231621	-1.42957	-0.843037	-0.184731	1.51993	-0.137119	-0.590919	1.44743	-0.918602	-0.695511			8.27107	-0.612534	-1.09428	-0.677498
	8.28131	-0.641266	-1.56543	0.846035	0.78672	0.745655	1.09744	1.11968	1.21907	0.340015	0.953728	1.19925	0.753071			8.28131	-0.641266	-1.33893	-0.861225	-0.201736	-2.01445	0.191875	-0.312027	0.0408897	-0.916412	-0.398224	-1.78087	-1.11784			8.28131	-0.641266	-1.19364	-0.178524	-1.47699	-0.744648	-0.306061	1.56542	-0.0217857	-0.443958	1.40176	-0.86515	-0.736866			8.28131	-0.641266	-1.07125	-0.682301
	8.29155	-0.642956	-1.56133	0.855263	0.794884	0.666084	1.13191	1.08472	1.16387	0.299736	0.970249	1.13583	0.675503			8.29155	-0.642956	-1.31414	-0.786144	-0.319752	-2.13216	0.0313721	-0.331566	0.0552177	-0.98597	-0.402184	-1.77793	-1.14356			8.29155	-0.642956	-1.14674	-0.177284	-1.40393	-0.738491	-0.344551	1.5601	-0.0884132	-0.52676	1.51388	-0.844978	-0.700661			8.29155	-0.642956	-1.08224	-0.621765
	8.30179	-0.657623	-1.55517	0.762493	0.711048	0.663902	1.0781	1.03374	1.13777	0.436741	0.986206	1.23561	0.641754			8.30179	-0.657623	-1.29576	-0.746082	-0.356079	-2.06127	0.0512428	-0.384399	-0.0780563	-0.970177	-0.346775	-1.81342	-1.15567			8.30179	-0.657623	-1.14734	-0.114437	-1.39451	-0.678955	-0.334106	1.44115	-0.11533	-0.551903	1.38561	-0.805172	-0.739475			8.30179	-0.657623	-1.07716	-0.673931
	8.31203	-0.69302	-1.54755	0.805988	0.597046	0.589958	1.04448	1.09004	1.12994	0.428505	1.00994	1.27864	0.72279			8.31203	-0.69302	-1.29287	-0.767933	-0.438477	-2.00694	-0.0383072	-0.380966	-0.0958061	-0.965012	-0.507683	-1.84876	-1.14526			8.31203	-0.69302	-1.16003	-0.154293	-1.45673	-0.730408	-0.287781	1.35579	-0.150806	-0.575699	1.37072	-0.789761	-0.704926			8.31203	-0.69302	-1.0756	-0.697598
	8.32227	-0.711246	-1.5545	0.84359	0.523556	0.620697	1.14292	0.969227	1.12448	0.321239	0.927105	1.236	0.672428			8.32227	-0.711246	-1.27938	-0.740597	-0.415333	-2.0269	-0.00275803	-0.34655	-0.00988007	-1.04176	-0.542507	-1.8727	-1.12608			8.32227	-0.711246	-1.14523	-0.226971	-1.44713	-0.786556	-0.328064	1.27303	-0.176102	-0.569557	1.28506	-0.799965	-0.730431			8.32227	-0.711246	-1.05758	-0.717609
	8.33251	-0.751102	-1.54539	0.748043	0.588367	0.66172	1.112	0.966587	0.983074	0.361343	0.85527	1.15796	0.660919			8.33251	-0.751102	-1.28789	-0.793312	-0.441311	-2.03936	-0.10516	-0.401768	-0.0212898	-1.09984	-0.58691	-1.8544	-1.18427			8.33251	-0.751102	-1.13133	-0.168179	-1.4351	-0.778004	-0.364197	1.28947	-0.083252	-0.602352	1.134	-0.804092	-0.717232			8.33251	-0.751102	-1.0717	-0.681053
	8.34275	-0.764149	-1.52608	0.696571	0.643696	0.603653	1.1254	0.961987	0.967865	0.392506	0.792221	1.16614	0.607029			8.34275	-0.764149	-1.26863	-0.810368	-0.486958	-2.00465	-0.148911	-0.435196	-0.0479927	-1.14108	-0.629063	-1.90742	-1.14349			8.34275	-0.764149	-1.13814	-0.0987167	-1.4222	-0.725185	-0.369026	1.23743	-0.0902214	-0.552879	1.06678	-0.828728	-0.752327			8.34275	-0.764149	-1.04976	-0.719391
	8.35299	-0.804569	-1.52993	0.760277	0.549042	0.525322	1.10062	0.943024	0.962006	0.339931	0.710396	1.12268	0.599003			8.35299	-0.804569	-1.28135	-0.68935	-0.437141	-2.03453	-0.0382614	-0.477516	-0.146008	-1.19226	-0.691448	-1.85476	-1.12867			8.35299	-0.804569	-1.14138	-0.166939	-1.43753	-0.768372	-0.291908	1.22961	-0.134727	-0.597118	1.04568	-0.894974	-0.717659			8.35299	-0.804569	-1.04474	-0.808655
	8.36323	-0.845867	-1.53207	0.639286	0.387642	0.556015	1.04029	0.987347	0.965797	0.327534	0.700893	1.02489	0.519363			8.36323	-0.845867	-1.25365	-0.697552	-0.496651	-1.95542	-0.0593452	-0.589287	-0.22385	-1.23551	-0.691814	-1.83014	-1.10544			8.36323	-0.845867	-1.12934	-0.191151	-1.4778	-0.820267	-0.245537	1.13757	-0.201065	-0.582993	1.05324	-0.880226	-0.690636			8.36323	-0.845867	-1.02327	-0.764435
	8.37347	-0.856354	-1.54156	0.570351	0.353779	0.560081	1.02431	0.90839	0.949814	0.235157	0.713219	0.933872	0.50111			8.37347	-0.856354	-1.24775	-0.715836	-0.547848	-1.96044	-0.119476	-0.61644	-0.251198	-1.19889	-0.684326	-1.87894	-1.22453			8.37347	-0.856354	-1.09428	-0.138699	-1.44818	-0.751148	-0.283943	1.07912	-0.149651	-0.594994	1.05276	-0.91486	-0.726097			8.37347	-0.856354	-0.98822	-0.81908
	8.38371	-0.86414	-1.54404	0.49091	0.45018	0.510071	0.911709	0.910931	0.887993	0.179165	0.717598	0.889683	0.474468			8.38371	-0.86414	-1.22521	-0.784191	-0.641712	-1.94407	-0.191002	-0.605282	-0.250824	-1.17246	-0.724312	-1.87844	-1.28091			8.38371	-0.86414	-1.07125	-0.141369	-1.56161	-0.865948	-0.259449	1.08045	-0.183327	-0.470818	0.955967	-0.870476	-0.767918			8.38371	-0.86414	-1.01178	-0.839836
	8.39395	-0.875828	-1.56858	0.559277	0.402344	0.499954	0.885101	0.812656	0.915768	0.134926	0.684361	0.969563	0.493073			8.39395	-0.875828	-1.23301	-0.674793	-0.656986	-1.92633	-0.193542	-0.67231	-0.278687	-1.20517	-0.744995	-1.8399	-1.28563			8.39395	-0.875828	-1.08224	-0.116455	-1.53578	-0.832069	-0.275803	1.07177	-0.147564	-0.450466	0.854012	-0.954891	-0.699371			8.39395	-0.875828	-1.01723	-0.807961
	8.40419	-0.87075	-1.5317	0.56781	0.350559	0.514626	0.843895	0.828152	0.873795	0.129719	0.667679	0.949978	0.423195			8.40419	-0.87075	-1.22234	-0.653801	-0.586567	-1.92263	-0.231628	-0.767586	-0.342163	-1.24773	-0.724182	-1.89237	-1.30564			8.40419	-0.87075	-1.07716	-0.155972	-1.48266	-0.80286	-0.40847	1.08378	-0.118896	-0.475121	0.89764	-0.927376	-0.714741			8.40419	-0.87075	-0.998543	-0.776787
	8.41443	-0.920204	-1.51721	0.541584	0.340523	0.487984	0.875496	0.773994	0.823357	0.11013	0.62006	0.869583	0.347641			8.41443	-0.920204	-1.21701	-0.734577	-0.619747	-1.8195	-0.310127	-0.789207	-0.342705	-1.28154	-0.727051	-1.84813	-1.22704			8.41443	-0.920204	-1.0756	-0.169392	-1.52469	-0.909626	-0.37978	0.934898	-0.0508041	-0.472843	0.861305	-0.915226	-0.656685			8.41443	-0.920204	-0.994118	-0.827679
	8.42467	-0.930252	-1.50964	0.50848	0.310314	0.344585	0.888275	0.704914	0.933064	0.00553513	0.656013	0.816284	0.420715			8.42467	-0.930252	-1.21574	-0.788593	-0.64764	-1.71609	-0.380295	-0.76265	-0.316956	-1.22614	-0.702438	-1.8021	-1.24224			8.42467	-0.930252	-1.05758	-0.241219	-1.44547	-0.978516	-0.426899	0.827587	-0.0923462	-0.486816	0.772575	-0.992809	-0.716301			8.42467	-0.930252	-0.975327	-0.771923
	8.43491	-0.905918	-1.52322	0.496498	0.281689	0.36285	0.841438	0.710789	0.861229	0.00124359	0.661575	0.795124	0.31139			8.43491	-0.905918	-1.20521	-0.800179	-0.671635	-1.76289	-0.377647	-0.766773	-0.300751	-1.26419	-0.9039	-1.68398	-1.30421			8.43491	-0.905918	-1.0717	-0.204765	-1.51218	-0.909969	-0.402309	0.739609	-0.198917	-0.488342	0.788551	-0.952103	-0.736755			8.43491	-0.905918	-0.991199	-0.708637
	8.44515	-0.951416	-1.50877	0.476463	0.218365	0.315418	0.739143	0.691708	0.738983	0.0224419	0.598301	0.802803	0.376549			8.44515	-0.951416	-1.19257	-0.768742	-0.691151	-1.80589	-0.369709	-0.783787	-0.323711	-1.26414	-0.865551	-1.74096	-1.16616			8.44515	-0.951416	-1.04976	-0.202271	-1.52048	-0.927006	-0.384357	0.670658	-0.140221	-0.459637	0.831226	-0.94231	-0.791775			8.44515	-0.951416	-0.9529	-0.804241
	8.45539	-0.948887	-1.49768	0.419155	0.304878	0.229469	0.798378	0.714081	0.690163	0.0588379	0.536873	0.852306	0.369049			8.45539	-0.948887	-1.17168	-0.691387	-0.804592	-1.88456	-0.400871	-0.83371	-0.41375	-1.30616	-0.882347	-1.80661	-1.1125			8.45539	-0.948887	-1.04474	-0.254868	-1.43877	-0.919353	-0.458778	0.661446	-0.0721016	-0.456379	0.762466	-0.993263	-0.839432			8.45539	-0.948887	-0.936363	-0.738354
	8.46563	-0.967781	-1.48507	0.44915	0.329468	0.388969	0.815746	0.697701	0.619175	-0.0206184	0.514046	0.873409	0.369804			8.46563	-0.967781	-1.18629	-0.653027	-0.807129	-1.7688	-0.416893	-0.803513	-0.46209	-1.31196	-0.855408	-1.77187	-1.07928			8.46563	-0.967781	-1.02327	-0.274014	-1.41138	-0.960861	-0.443699	0.689247	-0.176674	-0.556564	0.562698	-0.955009	-0.786385			8.46563	-0.967781	-0.933502	-0.751846
	8.47587	-0.983238	-1.50819	0.459915	0.297066	0.389091	0.633785	0.653069	0.660767	-0.0478325	0.486877	0.774693	0.392891			8.47587	-0.983238	-1.19364	-0.658474	-0.799728	-1.78425	-0.483936	-0.710876	-0.511887	-1.3661	-0.902256	-1.73947	-1.12402			8.47587	-0.983238	-0.98822	-0.189037	-1.44883	-1.035	-0.386883	0.680496	-0.225361	-0.527321	0.47937	-0.971947	-0.900837			8.47587	-0.983238	-0.921764	-0.730999
	8.48611	-1.04504	-1.51362	0.40987	0.207184	0.408005	0.677906	0.636929	0.699429	-0.0260658	0.451626	0.753437	0.302147			8.48611	-1.04504	-1.14674	-0.71225	-0.89024	-1.76092	-0.469139	-0.80764	-0.37825	-1.38663	-0.968967	-1.83572	-1.12182			8.48611	-1.04504	-1.01178	-0.139164	-1.4022	-0.931202	-0.318993	0.540833	-0.197132	-0.559105	0.509758	-1.02849	-0.842876			8.48611	-1.04504	-0.93663	-0.727264
	8.49635	-1.06079	-1.49121	0.350029	0.144829	0.426079	0.783344	0.639301	0.656857	-0.0833702	0.35664	0.706394	0.304546			8.49635	-1.06079	-1.14734	-0.786518	-0.824436	-1.7554	-0.513176	-0.821362	-0.352394	-1.40536	-0.915253	-1.80263	-1.21667			8.49635	-1.06079	-1.01723	-0.212788	-1.43908	-0.861309	-0.341297	0.567806	-0.226398	-0.570557	0.514011	-1.03369	-0.855896			8.49635	-1.06079	-0.933159	-0.671288
	8.50659	-1.04236	-1.47937	0.345364	0.170696	0.306534	0.719925	0.592716	0.631836	-0.105854	0.387802	0.760578	0.248016			8.50659	-1.04236	-1.16003	-0.857162	-0.83337	-1.74427	-0.684826	-0.857754	-0.403831	-1.46445	-0.864227	-1.77792	-1.21514			8.50659	-1.04236	-0.998543	-0.217457	-1.47524	-0.808514	-0.375916	0.540222	-0.209721	-0.562977	0.426273	-1.02103	-0.784702			8.50659	-1.04236	-0.899708	-0.668533
	8.51683	-1.03119	-1.47402	0.359455	0.154434	0.271812	0.661083	0.625046	0.578918	-0.156567	0.359348	0.696766	0.306534			8.51683	-1.03119	-1.14523	-0.783443	-0.832233	-1.70742	-0.663807	-0.894066	-0.45562	-1.46216	-0.931808	-1.76431	-1.15459			8.51683	-1.03119	-0.994118	-0.203583	-1.38541	-0.878632	-0.380859	0.487648	-0.137707	-0.550831	0.35041	-0.980103	-0.885651			8.51683	-1.03119	-0.879486	-0.679272
	8.52707	-1.03002	-1.46601	0.263603	0.087822	0.271152	0.62431	0.585182	0.518204	-0.0947685	0.318634	0.576923	0.322201			8.52707	-1.03002	-1.13133	-0.727726	-0.872288	-1.79961	-0.590733	-0.915443	-0.495182	-1.44868	-0.942654	-1.67044	-1.13059			8.52707	-1.03002	-0.975327	-0.234505	-1.41547	-0.903904	-0.410877	0.429394	-0.140186	-0.455212	0.291916	-0.977539	-0.855122			8.52707	-1.03002	-0.894672	-0.76384
	8.53731	-1.06152	-1.45681	0.194866	0.0652046	0.278175	0.646935	0.64114	0.509109	-0.010807	0.295975	0.583935	0.263634			8.53731	-1.06152	-1.13814	-0.736069	-0.930073	-1.83724	-0.528576	-0.918659	-0.534855	-1.45104	-0.939045	-1.6388	-1.06596			8.53731	-1.06152	-0.991199	-0.234364	-1.41861	-0.806377	-0.441254	0.47084	-0.150867	-0.372025	0.319359	-0.976025	-0.763935			8.53731	-1.06152	-0.912876	-0.658745
	8.54755	-1.07307	-1.44362	0.264256	0.068367	0.174583	0.627743	0.626484	0.605621	-0.0937881	0.268616	0.65168	0.260925			8.54755	-1.07307	-1.14138	-0.661133	-1.00462	-1.82608	-0.667168	-0.879379	-0.535084	-1.48969	-0.982018	-1.64462	-1.15119			8.54755	-1.07307	-0.9529	-0.216831	-1.38039	-0.867641	-0.395966	0.472595	-0.120144	-0.426102	0.257713	-0.936111	-0.860901			8.54755	-1.07307	-0.87867	-0.744026
	8.55779	-1.06926	-1.438	0.309864	0.120056	0.139488	0.494183	0.666458	0.590302	-0.196415	0.298656	0.686035	0.309326			8.55779	-1.06926	-1.12934	-0.676105	-0.973751	-1.87597	-0.773399	-0.958462	-0.532722	-1.5375	-0.973793	-1.65504	-1.20238			8.55779	-1.06926	-0.936363	-0.198574	-1.38271	-0.868698	-0.395538	0.369728	-0.142914	-0.356934	0.181671	-0.997139	-0.778137			8.55779	-1.06926	-0.866524	-0.737293
	8.56804	-1.09282	-1.44598	0.330143	0.0250549	0.050045	0.588619	0.626316	0.540531	-0.120358	0.260818	0.624393	0.379158			8.56804	-1.09282	-1.09428	-0.647781	-1.04644	-1.91031	-0.676659	-0.994572	-0.604702	-1.55704	-0.886936	-1.76517	-1.10173			8.56804	-1.09282	-0.933502	-0.227474	-1.36338	-0.940598	-0.366856	0.393177	-0.144238	-0.358929	0.179867	-0.969421	-0.7626			8.56804	-1.09282	-0.861053	-0.77774
	8.57827	-1.12096	-1.40332	0.20718	0.108025	0.100349	0.73856	0.628033	0.431599	-0.0423393	0.241032	0.509274	0.275173			8.57827	-1.12096	-1.07125	-0.678143	-1.01033	-1.91824	-0.62447	-1.01818	-0.598297	-1.4835	-0.873814	-1.7814	-1.12171			8.57827	-1.12096	-0.921764	-0.194977	-1.4074	-0.966381	-0.402954	0.293098	-0.211544	-0.409958	0.166267	-0.968037	-0.778587			8.57827	-1.12096	-0.820793	-0.749336
	8.58851	-1.12101	-1.38949	0.219769	0.0945206	0.125637	0.629986	0.580803	0.406826	-0.135593	0.225819	0.475239	0.207081			8.58851	-1.12101	-1.08224	-0.729164	-0.98629	-1.92051	-0.639648	-0.994701	-0.604355	-1.47808	-0.930058	-1.68739	-1.16825			8.58851	-1.12101	-0.93663	-0.146885	-1.42358	-1.00441	-0.504875	0.200233	-0.265247	-0.440109	0.033432	-1.01362	-0.919041			8.58851	-1.12101	-0.820248	-0.757679
	8.59875	-1.13716	-1.41004	0.214821	0.0547295	0.199436	0.652252	0.555283	0.41943	-0.121563	0.227074	0.534378	0.123566			8.59875	-1.13716	-1.07716	-0.619183	-1.01144	-1.83409	-0.765507	-1.0451	-0.594101	-1.47565	-0.891384	-1.6578	-1.14874			8.59875	-1.13716	-0.933159	-0.210438	-1.36012	-0.911606	-0.516853	0.231159	-0.290138	-0.333904	0.0911026	-1.05852	-0.840412			8.59875	-1.13716	-0.833721	-0.752888
	8.60899	-1.17647	-1.4407	0.206074	-0.0269051	0.120972	0.661957	0.488552	0.353371	-0.162773	0.252037	0.529339	0.128475			8.60899	-1.17647	-1.0756	-0.580559	-1.06874	-1.87652	-0.776737	-1.0419	-0.680359	-1.49075	-0.842686	-1.6647	-1.03913			8.60899	-1.17647	-0.899708	-0.213589	-1.29197	-0.906631	-0.460793	0.261929	-0.280853	-0.309052	0.0137367	-0.980877	-0.817078			8.60899	-1.17647	-0.827332	-0.738449
	8.61924	-1.15068	-1.43261	0.195606	-0.0577698	0.296665	0.598324	0.453201	0.37793	-0.216297	0.227463	0.510693	0.109554			8.61924	-1.15068	-1.05758	-0.599289	-0.995621	-1.91825	-0.875977	-1.01909	-0.732216	-1.59152	-0.894962	-1.72346	-1.04339			8.61924	-1.15068	-0.879486	-0.251244	-1.34385	-0.943203	-0.455547	0.254021	-0.292774	-0.350498	-0.0230598	-0.889515	-0.770386			8.61924	-1.15068	-0.816292	-0.759762
	8.62947	-1.14676	-1.42523	0.159344	-0.0467072	0.555817	0.545059	0.437443	0.302937	-0.147251	0.250534	0.484062	0.0799675			8.62947	-1.14676	-1.0717	-0.686199	-1.08827	-1.8755	-0.841881	-1.0501	-0.697716	-1.50846	-0.919209	-1.64346	-1.08487			8.62947	-1.14676	-0.894672	-0.173519	-1.41486	-0.860424	-0.517273	0.149181	-0.266285	-0.380608	-0.147469	-0.890373	-0.779053			8.62947	-1.14676	-0.815727	-0.784786
	8.63972	-1.15506	-1.40191	0.165447	-0.0199356	0.317589	0.543304	0.401512	0.328339	-0.141376	0.247158	0.442745	0.00173187			8.63972	-1.15506	-1.04976	-0.639507	-1.1035	-1.88534	-0.832191	-1.08961	-0.724228	-1.36784	-0.943695	-1.64898	-1.03614			8.63972	-1.15506	-0.912876	-0.149364	-1.27949	-0.800251	-0.516998	0.0643387	-0.306625	-0.473091	-0.138432	-0.905308	-0.782364			8.63972	-1.15506	-0.803326	-0.781067
	8.64995	-1.16784	-1.40252	0.0993538	-0.0934486	0.18692	0.564667	0.466961	0.240456	-0.115604	0.201252	0.339268	0.14658			8.64995	-1.16784	-1.04474	-0.683601	-1.1065	-1.83981	-0.884155	-1.1636	-0.725281	-1.41696	-0.905617	-1.68456	-0.937901			8.64995	-1.16784	-0.87867	-0.114841	-1.25189	-0.835106	-0.490978	0.0153885	-0.330765	-0.475643	-0.0762024	-0.945568	-0.806725			8.64995	-1.16784	-0.784462	-0.788708
	8.6602	-1.17096	-1.39656	0.0664291	-0.108601	0.109695	0.590511	0.376122	0.27808	-0.207493	0.172619	0.351643	0.12722			8.6602	-1.17096	-1.02327	-0.637589	-1.04721	-1.87207	-0.875824	-1.03661	-0.619125	-1.42056	-0.905914	-1.6703	-0.907001			8.6602	-1.17096	-0.866524	-0.247372	-1.21851	-0.903175	-0.461685	-0.033699	-0.329884	-0.525425	-0.0919876	-0.931938	-0.834534			8.6602	-1.17096	-0.779808	-0.909252
	8.67043	-1.17538	-1.3803	0.0724144	-0.104797	0.0488052	0.543724	0.399796	0.248875	-0.29369	0.0905647	0.444935	0.0336418			8.67043	-1.17538	-0.98822	-0.52924	-1.03502	-1.9587	-0.778393	-1.12829	-0.171219	-1.44366	-0.918468	-1.67471	-0.944576			8.67043	-1.17538	-0.861053	-0.318394	-1.36106	-0.857819	-0.513199	-0.0159492	-0.244041	-0.438084	-0.112419	-0.895535	-0.934929			8.67043	-1.17538	-0.749828	-0.757309
	8.68067	-1.20072	-1.39669	0.105125	-0.0898857	0.00970459	0.41312	0.358181	0.188576	-0.243359	0.018158	0.380787	-0.0161972			8.68067	-1.20072	-1.01178	-0.524792	-1.17141	-1.9484	-0.846413	-1.14401	-0.326992	-1.48597	-0.938816	-1.63156	-1.06134			8.68067	-1.20072	-0.820793	-0.318275	-1.32002	-0.807758	-0.503529	-0.0898361	-0.261692	-0.423286	-0.118179	-0.945282	-0.978249			8.68067	-1.20072	-0.766777	-0.652069
	8.69092	-1.19775	-1.39174	0.0787315	-0.10276	-0.000270844	0.304695	0.226673	0.386608	-0.176662	-0.0255203	0.40501	0.0300331			8.69092	-1.19775	-1.01723	-0.482723	-1.17389	-1.97903	-0.819103	-1.06283	-0.597248	-1.55309	-0.953327	-1.60164	-1.02959			8.69092	-1.19775	-0.820248	-0.204502	-1.27352	-0.818264	-0.526989	-0.147858	-0.322826	-0.444855	-0.202923	-0.99152	-1.02073			8.69092	-1.19775	-0.754379	-0.73616
	8.70115	-1.19958	-1.41345	0.029953	-0.102974	0.0385513	0.380085	0.292938	0.335205	-0.155636	-0.0498962	0.410019	0.0307961			8.70115	-1.19958	-0.998543	-0.452217	-1.06573	-1.98537	-0.861839	-1.06937	-0.687225	-1.46773	-0.977203	-1.59488	-1.01601			8.70115	-1.19958	-0.833721	-0.175472	-1.33752	-0.896442	-0.53426	-0.164902	-0.351521	-0.489655	-0.146252	-0.97657	-0.942963			8.70115	-1.19958	-0.756512	-0.676117
	8.7114	-1.19752	-1.3898	0.0156097	-0.0988503	0.0973129	0.308655	0.330406	0.227119	-0.240211	-0.0797615	0.365887	-0.073719			8.7114	-1.19752	-0.994118	-0.555229	-1.1118	-1.97053	-0.968735	-1.10193	-0.746132	-1.43605	-1.00105	-1.53867	-1.01572			8.7114	-1.19752	-0.827332	-0.157902	-1.31421	-0.910183	-0.506401	-0.192749	-0.359222	-0.422634	-0.136688	-0.989067	-0.875443			8.7114	-1.19752	-0.75753	-0.709194
	8.72163	-1.2278	-1.38307	-0.0175781	-0.0643845	-0.0129547	0.318588	0.275318	0.246658	-0.291248	-0.152908	0.323689	-0.0759201			8.72163	-1.2278	-0.975327	-0.568104	-1.10204	-1.90275	-0.995613	-1.11591	-0.78157	-1.52763	-1.02303	-1.46442	-0.958984			8.72163	-1.2278	-0.816292	-0.141476	-1.41574	-0.836384	-0.58849	-0.246021	-0.275234	-0.400604	-0.197128	-1.00728	-0.877232			8.72163	-1.2278	-0.737747	-0.75721
	8.73188	-1.24316	-1.37712	-0.0929184	-0.0122681	0.00188446	0.255714	0.239006	0.301125	-0.322575	-0.153648	0.277592	0.0130196			8.73188	-1.24316	-0.991199	-0.608189	-1.09987	-1.81773	-1.00908	-1.16375	-0.854263	-1.51942	-1.02755	-1.53003	-0.920338			8.73188	-1.24316	-0.815727	-0.24165	-1.3744	-0.783989	-0.631439	-0.318398	-0.323349	-0.509212	-0.335506	-1.05742	-0.861019			8.73188	-1.24316	-0.70507	-0.765095
	8.74212	-1.24982	-1.39741	-0.00101089	-0.0409966	-0.0320282	0.227188	0.200302	0.21447	-0.360844	-0.106274	0.245651	-0.0639038			8.74212	-1.24982	-0.9529	-0.618847	-1.20397	-1.79231	-0.987484	-1.21998	-0.881149	-1.55928	-1.03964	-1.59815	-0.878521			8.74212	-1.24982	-0.803326	-0.262581	-1.33511	-0.845619	-0.668957	-0.39159	-0.33794	-0.526688	-0.343533	-1.029	-0.880501			8.74212	-1.24982	-0.745831	-0.701962
	8.75236	-1.26388	-1.41652	-0.00697708	-0.123512	-0.127029	0.190495	0.238934	0.21875	-0.38335	-0.049469	0.211193	-0.0607834			8.75236	-1.26388	-0.936363	-0.509033	-1.18065	-1.85893	-0.939743	-1.17235	-0.811085	-1.57483	-0.95274	-1.53547	-0.91246			8.75236	-1.26388	-0.784462	-0.142475	-1.26639	-0.896618	-0.66848	-0.404251	-0.301174	-0.443424	-0.377724	-1.07985	-0.826378			8.75236	-1.26388	-0.766811	-0.767178
	8.7626	-1.26743	-1.40909	-0.0238495	-0.180008	-0.064621	0.323174	0.219887	0.200821	-0.296658	-0.109707	0.180363	-0.0720024			8.7626	-1.26743	-0.933502	-0.495514	-1.1982	-1.86148	-0.922802	-1.09908	-0.756203	-1.59867	-1.03503	-1.45295	-0.886665			8.7626	-1.26743	-0.779808	-0.189137	-1.3656	-0.862595	-0.610958	-0.393127	-0.334866	-0.478291	-0.415211	-1.10701	-0.775063			8.7626	-1.26743	-0.778084	-0.784821
	8.77284	-1.25682	-1.37848	0.028244	-0.126484	-0.0974998	0.242699	0.127655	0.107613	-0.331333	-0.1595	0.156094	-0.0727005			8.77284	-1.25682	-0.921764	-0.579006	-1.14713	-1.85501	-0.90918	-1.18246	-0.755142	-1.56639	-1.12461	-1.51718	-0.953922			8.77284	-1.25682	-0.749828	-0.192654	-1.20106	-0.793716	-0.488079	-0.403046	-0.267525	-0.41275	-0.409512	-1.03386	-0.834023			8.77284	-1.25682	-0.703312	-0.774155
	8.78308	-1.26912	-1.37332	0.039402	-0.130653	-0.0943985	0.307335	0.094429	0.176823	-0.342445	-0.12606	0.216827	-0.0928726			8.78308	-1.26912	-0.93663	-0.62344	-1.17777	-1.81593	-0.975372	-1.18937	-0.879074	-1.61255	-1.02076	-1.54832	-0.922092			8.78308	-1.26912	-0.766777	-0.174629	-1.25194	-0.916168	-0.443924	-0.381268	-0.207359	-0.346985	-0.422115	-1.06348	-0.896439			8.78308	-1.26912	-0.671837	-0.731548
	8.79331	-1.26805	-1.37795	-0.0499649	-0.166561	-0.163494	0.257935	0.117962	0.150024	-0.375156	-0.158878	0.286411	-0.1134			8.79331	-1.26805	-0.933159	-0.53931	-1.17527	-1.77851	-0.999565	-1.10082	-0.884293	-1.54055	-0.935787	-1.49473	-0.883945			8.79331	-1.26805	-0.754379	-0.160847	-1.17603	-0.92355	-0.507748	-0.463165	-0.316269	-0.308105	-0.40831	-0.974129	-0.8741			8.79331	-1.26805	-0.677864	-0.756138
	8.80356	-1.24559	-1.38686	-0.0183983	-0.182213	-0.072216	0.218689	0.1604	0.117313	-0.387386	-0.210972	0.26804	-0.118668			8.80356	-1.24559	-0.899708	-0.504398	-1.18914	-1.7664	-1.10777	-1.18545	-0.753139	-1.49627	-0.939865	-1.45263	-0.872383			8.80356	-1.24559	-0.756512	-0.134335	-1.15631	-0.889671	-0.591648	-0.515007	-0.32341	-0.401653	-0.49229	-0.963436	-0.854774			8.80356	-1.24559	-0.669777	-0.738392
	8.8138	-1.28402	-1.36269	0.0186501	-0.106178	-0.00411224	0.234077	0.110657	0.146042	-0.400444	-0.190887	0.290821	-0.178703			8.8138	-1.28402	-0.879486	-0.514301	-1.22628	-1.73903	-1.07935	-1.12035	-0.740932	-1.45471	-0.918549	-1.4736	-0.923691			8.8138	-1.28402	-0.75753	-0.140091	-1.23292	-0.875328	-0.596153	-0.47525	-0.37487	-0.434315	-0.570396	-1.01686	-0.89875			8.8138	-1.28402	-0.673164	-0.744171
	8.82404	-1.31929	-1.32909	-0.0867043	-0.158001	-0.0344276	0.217663	0.115936	0.20293	-0.444145	-0.185905	0.186371	-0.205803			8.82404	-1.31929	-0.894672	-0.479481	-1.18704	-1.67792	-1.03242	-1.20214	-0.833107	-1.41213	-1.00362	-1.40374	-0.916752			8.82404	-1.31929	-0.737747	-0.158703	-1.24247	-0.843067	-0.511551	-0.475418	-0.295349	-0.419296	-0.58947	-1.00728	-0.973591			8.82404	-1.31929	-0.618034	-0.801525
	8.83428	-1.28842	-1.28814	-0.0390358	-0.0592117	-0.0729065	0.180687	0.188869	0.229012	-0.347202	-0.204262	0.143646	-0.157387			8.83428	-1.28842	-0.912876	-0.477863	-1.11931	-1.8211	-1.08739	-1.22783	-0.824142	-1.5352	-0.974579	-1.41005	-0.902145			8.83428	-1.28842	-0.70507	-0.142277	-1.3424	-0.847553	-0.523926	-0.488304	-0.244495	-0.291908	-0.588936	-1.05765	-0.957867			8.83428	-1.28842	-0.638783	-0.831947
	8.84452	-1.27405	-1.29868	-0.0866737	-0.114277	-0.131203	0.132359	0.198513	0.194313	-0.364658	-0.0919533	0.135159	-0.223263			8.84452	-1.27405	-0.87867	-0.542042	-1.15275	-1.83115	-1.056	-1.18684	-0.782036	-1.48792	-0.807343	-1.54853	-0.859493			8.84452	-1.27405	-0.745831	-0.166428	-1.24437	-0.848064	-0.619606	-0.601471	-0.36554	-0.282047	-0.671677	-1.04383	-0.96172			8.84452	-1.27405	-0.636684	-0.703331
	8.85476	-1.28138	-1.31363	-0.0194855	-0.218094	-0.181969	0.19194	0.15276	0.131084	-0.423473	-0.0779953	0.130199	-0.297905			8.85476	-1.28138	-0.866524	-0.570972	-1.1948	-1.78751	-1.07838	-1.21509	-0.838997	-1.46543	-0.761711	-1.43839	-0.748714			8.85476	-1.28138	-0.766811	-0.139759	-1.18874	-0.786587	-0.566566	-0.513741	-0.402622	-0.26506	-0.609249	-0.98394	-0.89558			8.85476	-1.28138	-0.632908	-0.688354
	8.865	-1.27079	-1.3316	0.0552559	-0.196037	-0.241615	0.134457	0.0348625	0.139835	-0.427917	-0.0453911	0.182163	-0.196907			8.865	-1.27079	-0.861053	-0.521122	-1.23365	-1.70155	-1.06934	-1.28788	-0.929054	-1.48285	-0.886806	-1.36934	-0.742447			8.865	-1.27079	-0.778084	-0.14349	-1.11947	-0.900074	-0.542618	-0.528992	-0.389484	-0.27298	-0.612087	-0.981258	-0.937378			8.865	-1.27079	-0.628624	-0.714264
	8.87524	-1.28992	-1.33936	0.0752296	-0.155006	-0.230347	0.22298	0.0695992	0.170925	-0.411278	-0.109718	0.15522	-0.200844			8.87524	-1.28992	-0.820793	-0.537586	-1.21887	-1.75758	-1.07872	-1.25574	-0.902161	-1.5733	-0.964924	-1.32566	-0.678726			8.87524	-1.28992	-0.703312	-0.0784035	-1.12584	-0.825249	-0.550201	-0.526966	-0.406677	-0.315449	-0.717812	-0.991592	-0.948112			8.87524	-1.28992	-0.584236	-0.719734
	8.88548	-1.28854	-1.33893	0.0419693	-0.145519	-0.211571	0.260414	0.087719	0.199856	-0.363632	-0.117836	0.136074	-0.218414			8.88548	-1.28854	-0.820248	-0.58604	-1.06411	-1.83303	-1.07493	-1.17348	-0.919899	-1.64639	-0.983154	-1.27424	-0.783962			8.88548	-1.28854	-0.671837	-0.117752	-1.08147	-0.763451	-0.59861	-0.537884	-0.410015	-0.321007	-0.689575	-0.99369	-0.922104			8.88548	-1.28854	-0.579323	-0.685604
	8.89572	-1.31275	-1.31414	-0.0725899	-0.221161	-0.136902	0.25729	0.091877	0.177814	-0.329895	-0.121017	0.167641	-0.28727			8.89572	-1.31275	-0.833721	-0.529728	-1.0445	-1.70449	-0.998489	-1.2287	-0.936054	-1.60308	-0.926918	-1.34681	-0.826344			8.89572	-1.31275	-0.677864	-0.149929	-1.10337	-0.762615	-0.533558	-0.52037	-0.33736	-0.356258	-0.700409	-0.997696	-0.954231			8.89572	-1.31275	-0.590618	-0.605423
	8.90596	-1.29486	-1.29576	-0.0972672	-0.203732	-0.173485	0.17897	0.0352554	0.182083	-0.43581	-0.125084	0.116707	-0.263355			8.90596	-1.29486	-0.827332	-0.560722	-1.16316	-1.70431	-0.997021	-1.224	-0.983246	-1.56977	-0.937878	-1.39227	-0.780865			8.90596	-1.29486	-0.669777	-0.0845871	-1.09246	-0.756157	-0.51992	-0.571907	-0.390629	-0.385918	-0.698212	-0.950146	-1.02245			8.90596	-1.29486	-0.57111	-0.702629
	8.9162	-1.31221	-1.29287	-0.076992	-0.151875	-0.160263	0.159691	-0.0325737	0.127224	-0.39888	-0.152218	0.0619392	-0.218803			8.9162	-1.31221	-0.816292	-0.487171	-1.18652	-1.67062	-1.06079	-1.25528	-0.916218	-1.58029	-0.970898	-1.36099	-0.731728			8.9162	-1.31221	-0.673164	-0.081192	-1.17345	-0.778027	-0.499607	-0.645374	-0.381702	-0.32407	-0.608402	-1.02756	-0.946899			8.9162	-1.31221	-0.583096	-0.693878
	8.92644	-1.29066	-1.27938	-0.179283	-0.126541	-0.106392	0.247379	0.05756	0.213444	-0.336269	-0.149673	0.0456886	-0.244045			8.92644	-1.29066	-0.815727	-0.473866	-1.21778	-1.55237	-1.09425	-1.27687	-0.997482	-1.49622	-0.881237	-1.37957	-0.730034			8.92644	-1.29066	-0.618034	-0.111591	-1.23315	-0.715656	-0.44482	-0.67675	-0.43903	-0.276657	-0.740246	-1.04458	-0.907272			8.92644	-1.29066	-0.585247	-0.761112
	8.93668	-1.25476	-1.28789	-0.168095	-0.141586	-0.0391731	0.335667	0.0164833	0.234497	-0.422283	-0.142593	0.138142	-0.282356			8.93668	-1.25476	-0.803326	-0.402531	-1.15633	-1.57264	-1.02998	-1.2401	-0.992119	-1.49623	-0.824081	-1.39438	-0.622757			8.93668	-1.25476	-0.638783	-0.112499	-1.27987	-0.728119	-0.446369	-0.619743	-0.411564	-0.260483	-0.722664	-0.999939	-0.981041			8.93668	-1.25476	-0.581123	-0.751003
	8.94692	-1.27279	-1.26863	-0.115818	-0.0849495	-0.0745163	0.311466	-0.00928116	0.176277	-0.420326	-0.171074	0.11903	-0.312645			8.94692	-1.27279	-0.784462	-0.427914	-1.18127	-1.6154	-0.986568	-1.19842	-0.906776	-1.5191	-0.817497	-1.3406	-0.531921			8.94692	-1.27279	-0.636684	-0.160454	-1.29631	-0.761269	-0.520195	-0.663399	-0.436802	-0.2005	-0.679871	-1.03809	-1.00878			8.94692	-1.27279	-0.563148	-0.710281
	8.95716	-1.27881	-1.28135	-0.233013	-0.0997086	-0.109108	0.233925	0.0171356	0.23761	-0.497501	-0.132977	0.0238533	-0.271328			8.95716	-1.27881	-0.779808	-0.448299	-1.13814	-1.63165	-1.03815	-1.21786	-0.884392	-1.5026	-0.857651	-1.31318	-0.672287			8.95716	-1.27881	-0.632908	-0.0949364	-1.23025	-0.794312	-0.544765	-0.723137	-0.452919	-0.252388	-0.694771	-1.05904	-1.05027			8.95716	-1.27881	-0.547447	-0.753563
	8.9674	-1.29741	-1.25365	-0.199921	-0.124584	-0.151001	0.161469	-0.0340996	0.109367	-0.473972	-0.113281	0.137363	-0.290642			8.9674	-1.29741	-0.749828	-0.464497	-1.17116	-1.53327	-1.14147	-1.30378	-1.01801	-1.52234	-0.794571	-1.27899	-0.629433			8.9674	-1.29741	-0.628624	-0.0115623	-1.17181	-0.829971	-0.590542	-0.831093	-0.388771	-0.201389	-0.833492	-1.09961	-1.07543			8.9674	-1.29741	-0.550652	-0.702629
	8.97764	-1.289	-1.24775	-0.204739	-0.246861	-0.199066	0.124275	-0.050705	0.160957	-0.475819	-0.142044	0.104366	-0.253246			8.97764	-1.289	-0.766777	-0.421818	-1.13731	-1.49437	-1.08368	-1.29279	-1.02842	-1.5369	-0.786339	-1.20122	-0.615997			8.97764	-1.289	-0.584236	-0.0720634	-1.16382	-0.6889	-0.561214	-0.867222	-0.351482	-0.255249	-0.879173	-1.13686	-0.957676			8.97764	-1.289	-0.52916	-0.737057
	8.98788	-1.30107	-1.22521	-0.19463	-0.270855	-0.122215	0.149788	-0.0944443	0.0918884	-0.430222	-0.220867	0.115334	-0.246532			8.98788	-1.30107	-0.754379	-0.406384	-1.14125	-1.56252	-1.14469	-1.33568	-0.987633	-1.56379	-0.767193	-1.29777	-0.605625			8.98788	-1.30107	-0.579323	-0.0737877	-1.16402	-0.616928	-0.581921	-0.889896	-0.738411	-0.208923	-0.883621	-1.07348	-0.941082			8.98788	-1.30107	-0.531834	-0.852245
	8.99812	-1.27736	-1.23301	-0.149197	-0.204647	-0.113319	0.14138	-0.035305	0.0926743	-0.430637	-0.186203	0.136742	-0.324581			8.99812	-1.27736	-0.756512	-0.409874	-1.13568	-1.60861	-1.1715	-1.2634	-1.02725	-1.4669	-0.749393	-1.27049	-0.65287			8.99812	-1.27736	-0.590618	-0.0355949	-1.15402	-0.675858	-0.59705	-0.936245	-0.728065	-0.256775	-0.815704	-1.03017	-0.889988			8.99812	-1.27736	-0.566498	-0.81514
	9.00836	-1.26458	-1.22234	-0.182552	-0.251701	-0.2187	0.0504684	-0.134907	0.0984955	-0.405628	-0.0164719	0.190174	-0.396465			9.00836	-1.26458	-0.75753	-0.418266	-1.15898	-1.58432	-1.18126	-1.18436	-0.930237	-1.43285	-0.782856	-1.21104	-0.635918			9.00836	-1.26458	-0.57111	-0.104019	-1.14404	-0.680267	-0.608814	-0.936592	-0.505466	-0.315704	-0.782413	-1.0433	-0.942249			9.00836	-1.26458	-0.525433	-0.734814
	9.0186	-1.28873	-1.21701	-0.0750847	-0.208103	-0.258827	0.0324135	-0.134438	0.0650444	-0.440281	0.00923157	0.147663	-0.306557			9.0186	-1.28873	-0.737747	-0.440952	-1.21753	-1.57124	-1.13514	-1.22515	-0.917984	-1.47987	-0.777206	-1.27126	-0.43951			9.0186	-1.28873	-0.583096	-0.125324	-1.07987	-0.634922	-0.541199	-0.787033	-0.424763	-0.186775	-0.762802	-1.08307	-1.03178			9.0186	-1.28873	-0.464073	-0.590191
	9.02884	-1.27172	-1.21574	-0.0688744	-0.273766	-0.208618	0.0638351	-0.0833702	-0.0254021	-0.350327	-0.12933	0.0927925	-0.203953			9.02884	-1.27172	-0.70507	-0.362331	-1.1992	-1.59889	-1.10461	-1.33194	-1.01901	-1.43273	-0.722801	-1.17224	-0.447521			9.02884	-1.27172	-0.585247	-0.103638	-1.12796	-0.662468	-0.591885	-0.916901	-0.397274	-0.205585	-0.747421	-0.9729	-0.953003			9.02884	-1.27172	-0.489689	-0.641472
	9.03908	-1.26883	-1.20521	-0.250164	-0.373611	-0.234711	0.0660172	-0.0205193	0.0840073	-0.424068	-0.135178	0.0502586	-0.323898			9.03908	-1.26883	-0.745831	-0.370335	-1.18402	-1.5209	-1.12179	-1.30337	-1.01881	-1.42456	-0.692936	-1.13013	-0.531303			9.03908	-1.26883	-0.581123	-0.152943	-1.10646	-0.75153	-0.534275	-1.05607	-0.355812	-0.0749588	-0.80809	-0.976326	-0.986134			9.03908	-1.26883	-0.480152	-0.730007
	9.04932	-1.28068	-1.19257	-0.245602	-0.370407	-0.285149	0.0234222	-0.00520706	0.130569	-0.422123	-0.100441	0.160027	-0.282963			9.04932	-1.28068	-0.766811	-0.376495	-1.28133	-1.55034	-1.16074	-1.31952	-0.995518	-1.38553	-0.672909	-1.09399	-0.512238			9.04932	-1.28068	-0.563148	-0.101147	-1.21333	-0.736534	-0.474442	-0.83865	-0.378201	-0.0489349	-0.904865	-1.00655	-1.01125			9.04932	-1.28068	-0.45974	-0.714836
	9.05956	-1.25292	-1.17168	-0.281128	-0.334465	-0.285088	-0.0311966	-0.120205	0.178532	-0.352482	-0.0304642	0.169514	-0.339993			9.05956	-1.25292	-0.778084	-0.423836	-1.32862	-1.49973	-1.09901	-1.39218	-0.96693	-1.52147	-0.737923	-1.08582	-0.516243			9.05956	-1.25292	-0.547447	-0.0420685	-1.2271	-0.696491	-0.451099	-0.792	-0.404972	-0.0779839	-0.829262	-0.972534	-0.968071			9.05956	-1.25292	-0.459209	-0.635139
	9.0698	-1.24766	-1.18629	-0.299828	-0.276474	-0.307068	-0.0355606	-0.160416	0.132145	-0.36631	-0.0862808	0.109623	-0.31329			9.0698	-1.24766	-0.703312	-0.324867	-1.31303	-1.46014	-1.05074	-1.3601	-1.03222	-1.52689	-0.735352	-1.11554	-0.570976			9.0698	-1.24766	-0.550652	-0.0387154	-1.19754	-0.692665	-0.444424	-0.883759	-0.515316	-0.176682	-0.834587	-1.00513	-0.865707			9.0698	-1.24766	-0.493401	-0.640163
	9.08004	-1.27937	-1.19364	-0.23299	-0.393585	-0.211502	0.0277634	-0.163502	-0.00256348	-0.355988	-0.103844	0.0915871	-0.253555			9.08004	-1.27937	-0.671837	-0.338818	-1.1919	-1.46186	-1.12864	-1.26248	-1.06302	-1.44285	-0.6852	-1.21318	-0.492569			9.08004	-1.27937	-0.52916	0.0225334	-1.12534	-0.758015	-0.487972	-1.0862	-0.473186	-0.184532	-0.966602	-1.04292	-0.884972			9.08004	-1.27937	-0.47538	-0.654121
	9.09028	-1.27773	-1.14674	-0.25745	-0.421844	-0.206074	0.0270233	-0.156769	0.155907	-0.42284	-0.159882	0.0474205	-0.267277			9.09028	-1.27773	-0.677864	-0.389385	-1.18471	-1.3642	-1.14083	-1.38435	-1.04263	-1.4561	-0.657078	-1.21707	-0.507961			9.09028	-1.27773	-0.531834	-0.0329857	-1.04708	-0.714577	-0.52433	-0.999329	-0.48811	-0.0816803	-0.928825	-1.06116	-0.945816			9.09028	-1.27773	-0.434353	-0.642666
	9.10052	-1.24406	-1.14734	-0.252956	-0.356415	-0.243019	0.0962715	-0.212818	0.227463	-0.374195	-0.103302	0.0130501	-0.247715			9.10052	-1.24406	-0.669777	-0.358517	-1.18559	-1.39168	-1.11331	-1.39384	-1.03009	-1.36653	-0.689957	-1.13061	-0.513111			9.10052	-1.24406	-0.566498	-0.0278664	-1.03536	-0.696312	-0.467789	-0.90741	-0.452953	-0.0812263	-0.912956	-0.937988	-0.916325			9.10052	-1.24406	-0.423061	-0.722569
	9.11076	-1.25162	-1.16003	-0.222317	-0.33522	-0.264885	0.0950699	-0.18391	0.152687	-0.442368	-0.101528	0.0186043	-0.195442			9.11076	-1.25162	-0.673164	-0.273666	-1.19706	-1.39726	-1.06232	-1.36424	-1.05792	-1.44926	-0.593956	-1.12892	-0.566238			9.11076	-1.25162	-0.525433	-0.0272636	-1.12654	-0.652786	-0.538433	-0.988377	-0.410896	0.00250626	-0.939102	-0.854279	-0.902374			9.11076	-1.25162	-0.423054	-0.692902
	9.121	-1.25579	-1.14523	-0.203865	-0.360714	-0.291641	0.0688286	-0.108166	0.151161	-0.340958	-0.159058	0.121628	-0.31905			9.121	-1.25579	-0.618034	-0.259693	-1.24522	-1.45365	-1.06614	-1.36782	-1.18771	-1.45451	-0.698921	-1.13607	-0.523918			9.121	-1.25579	-0.464073	-0.0768166	-1.10627	-0.626621	-0.564445	-1.07219	-0.455708	-0.0540009	-0.882629	-0.908325	-0.940483			9.121	-1.25579	-0.455849	-0.626701
	9.13124	-1.26126	-1.13133	-0.220459	-0.42012	-0.231682	0.0738831	-0.104706	0.244152	-0.324276	-0.108643	0.129391	-0.283813			9.13124	-1.26126	-0.638783	-0.335094	-1.29881	-1.47906	-1.14055	-1.31447	-1.08043	-1.3486	-0.688179	-1.13141	-0.537605			9.13124	-1.26126	-0.489689	-0.0975723	-1.01679	-0.604877	-0.510345	-1.09024	-0.528294	-0.015007	-0.987774	-0.941334	-0.982582			9.13124	-1.26126	-0.454113	-0.638145
	9.14148	-1.27559	-1.13814	-0.25639	-0.32402	-0.207592	0.0111084	-0.118607	0.165798	-0.379509	-0.0764961	0.102688	-0.190933			9.14148	-1.27559	-0.636684	-0.333546	-1.35804	-1.48935	-1.13473	-1.23578	-1.0128	-1.33516	-0.668568	-1.17566	-0.640339			9.14148	-1.27559	-0.480152	-0.0837898	-0.972942	-0.655293	-0.476646	-1.06704	-0.504562	-0.0158539	-0.969128	-0.966599	-1.02116			9.14148	-1.27559	-0.453136	-0.679226
	9.15172	-1.27981	-1.14138	-0.282654	-0.248577	-0.198128	0.0703049	-0.160988	0.252258	-0.374584	-0.0985832	-0.0392113	-0.166298			9.15172	-1.27981	-0.632908	-0.432205	-1.32418	-1.52617	-1.20713	-1.34469	-0.981857	-1.41132	-0.639553	-1.14801	-0.577602			9.15172	-1.27981	-0.45974	-0.0463676	-0.930241	-0.709053	-0.506603	-1.04296	-0.496647	0.0472565	-0.976749	-0.974998	-0.996346			9.15172	-1.27981	-0.424656	-0.695843
	9.16196	-1.28866	-1.12934	-0.244221	-0.305496	-0.144241	0.0828705	-0.178738	0.25872	-0.384777	-0.199837	0.0188828	-0.130161			9.16196	-1.28866	-0.628624	-0.444077	-1.29331	-1.48072	-1.21245	-1.338	-1.04362	-1.38536	-0.634331	-1.08624	-0.487885			9.16196	-1.28866	-0.459209	-0.0332947	-0.988796	-0.687683	-0.510288	-1.07272	-0.529797	0.0290985	-1.05702	-0.978374	-0.953743			9.16196	-1.28866	-0.445747	-0.722282
	9.1722	-1.25302	-1.09428	-0.312561	-0.304184	-0.028656	0.112366	-0.178558	0.259998	-0.301033	-0.152344	0.0396957	-0.0952225			9.1722	-1.25302	-0.584236	-0.442371	-1.29039	-1.35703	-1.10263	-1.38602	-1.05756	-1.45414	-0.585732	-1.09766	-0.371727			9.1722	-1.25302	-0.493401	-0.0683746	-0.988903	-0.622868	-0.480282	-1.01451	-0.581772	-0.059761	-1.01104	-0.929485	-0.927444			9.1722	-1.25302	-0.406483	-0.731144
	9.18244	-1.25122	-1.07125	-0.292675	-0.358593	-0.159836	0.039566	-0.241108	0.310661	-0.230938	0.00925446	-0.0208855	-0.156006			9.18244	-1.25122	-0.579323	-0.452232	-1.39473	-1.41385	-1.04897	-1.30743	-1.02472	-1.43111	-0.585052	-1.17317	-0.470337			9.18244	-1.25122	-0.47538	-0.149693	-0.992741	-0.574741	-0.663673	-0.971054	-0.600582	-0.00992966	-1.02536	-0.92535	-0.847469			9.18244	-1.25122	-0.408306	-0.718491
	9.19268	-1.27135	-1.08224	-0.358921	-0.472294	-0.135765	0.0536804	-0.108234	0.259331	-0.30088	0.0582809	-0.0300179	-0.185513			9.19268	-1.27135	-0.590618	-0.44838	-1.32984	-1.33826	-1.08659	-1.22685	-0.988422	-1.41876	-0.594196	-1.07593	-0.384697			9.19268	-1.27135	-0.434353	-0.148594	-1.00032	-0.494953	-0.649742	-1.18409	-0.54681	-0.0862732	-1.05381	-1.00205	-0.875755			9.19268	-1.27135	-0.398968	-0.684135
	9.20292	-1.27097	-1.07716	-0.229771	-0.421333	-0.206764	0.0730133	-0.0599327	0.279285	-0.340527	-0.0252686	-0.0098381	-0.165638			9.20292	-1.27097	-0.57111	-0.373913	-1.20861	-1.34063	-0.97448	-1.35313	-1.05343	-1.49525	-0.648636	-1.03475	-0.426361			9.20292	-1.27097	-0.423061	-0.0728951	-1.03234	-0.477764	-0.606205	-1.17668	-0.561138	-0.0524406	-1.03307	-0.940609	-0.981972			9.20292	-1.27097	-0.361198	-0.695881
	9.21316	-1.27207	-1.0756	-0.270947	-0.320625	-0.244308	-0.00618744	-0.14283	0.344444	-0.275894	0.0158691	-0.0108376	-0.211571			9.21316	-1.27207	-0.583096	-0.30217	-1.22606	-1.38415	-0.90279	-1.34782	-1.07343	-1.47079	-0.789223	-1.10725	-0.466835			9.21316	-1.27207	-0.423054	-0.0194893	-1.02816	-0.501369	-0.52713	-1.18661	-0.506313	-0.0233765	-1.02791	-0.857529	-0.969311			9.21316	-1.27207	-0.369751	-0.596161
	9.2234	-1.24662	-1.05758	-0.225468	-0.344612	-0.2388	0.0638847	-0.146946	0.381386	-0.186184	0.0785141	-0.0144844	-0.0863075			9.2234	-1.24662	-0.585247	-0.374531	-1.25883	-1.38482	-0.980942	-1.33855	-1.10986	-1.40324	-0.738678	-1.06617	-0.451454			9.2234	-1.24662	-0.455849	-0.0658607	-1.04274	-0.519215	-0.524673	-1.13139	-0.589031	0.105858	-1.00529	-0.903366	-0.884979			9.2234	-1.24662	-0.366798	-0.62545
	9.23364	-1.24756	-1.0717	-0.211971	-0.306774	-0.218235	-0.00230026	-0.0530663	0.304607	-0.190693	0.0121384	-0.00462723	-0.0121346			9.23364	-1.24756	-0.581123	-0.456913	-1.25122	-1.36597	-0.993198	-1.30435	-1.02631	-1.47126	-0.685188	-1.02981	-0.47551			9.23364	-1.24756	-0.454113	-0.140808	-1.13173	-0.493477	-0.590733	-1.11945	-0.534184	0.106895	-1.09187	-0.920403	-0.852818			9.23364	-1.24756	-0.378212	-0.743111
	9.24388	-1.22549	-1.04976	-0.343472	-0.263657	-0.189575	-0.0404854	-0.0662155	0.284054	-0.242348	0.00304031	0.0310898	0.0370255			9.24388	-1.22549	-0.563148	-0.408173	-1.24575	-1.27218	-1.12283	-1.29058	-0.948441	-1.43732	-0.567493	-0.930061	-0.490803			9.24388	-1.22549	-0.453136	-0.133026	-1.08959	-0.434372	-0.583771	-1.1376	-0.499435	0.0426788	-1.04878	-0.838375	-0.944885			9.24388	-1.22549	-0.36842	-0.740463
	9.25412	-1.23851	-1.04474	-0.351471	-0.142441	-0.142059	0.0799866	-0.119297	0.315632	-0.226017	0.00997925	0.108227	0.0237961			9.25412	-1.23851	-0.547447	-0.369144	-1.26068	-1.29235	-1.11842	-1.29121	-0.972019	-1.35813	-0.557526	-0.981392	-0.571953			9.25412	-1.23851	-0.424656	-0.120724	-1.00428	-0.439308	-0.497398	-1.09291	-0.572868	0.0846252	-0.981552	-0.820564	-0.908478			9.25412	-1.23851	-0.324921	-0.727409
	9.26436	-1.23781	-1.02327	-0.240547	-0.186455	-0.126266	0.0872498	-0.191608	0.310638	-0.202496	-0.0379906	-0.0111732	-0.028595			9.26436	-1.23781	-0.550652	-0.33091	-1.30629	-1.24171	-1.03345	-1.29044	-0.978516	-1.42778	-0.552734	-0.998741	-0.408779			9.26436	-1.23781	-0.445747	-0.189301	-1.01813	-0.507652	-0.473274	-1.00298	-0.482533	0.0802994	-0.950935	-0.799679	-0.944054			9.26436	-1.23781	-0.302223	-0.709042
	9.2746	-1.2188	-0.98822	-0.267586	-0.26363	-0.182568	0.0548477	-0.111992	0.42342	-0.154308	-0.0164375	-0.0348816	-0.067688			9.2746	-1.2188	-0.52916	-0.338017	-1.32357	-1.21906	-1.00529	-1.28717	-0.971581	-1.34187	-0.581467	-0.955883	-0.366516			9.2746	-1.2188	-0.406483	-0.100601	-1.05522	-0.435825	-0.505615	-1.09872	-0.435635	0.0721245	-0.965878	-0.736053	-0.834618			9.2746	-1.2188	-0.312508	-0.573509
	9.28484	-1.21674	-1.01178	-0.367958	-0.211143	-0.198635	-0.0100479	-0.105484	0.444855	-0.114517	0.0150948	-0.0899773	-0.00980759			9.28484	-1.21674	-0.531834	-0.432499	-1.2825	-1.21201	-1.0719	-1.23132	-0.98679	-1.34847	-0.551815	-0.902302	-0.429806			9.28484	-1.21674	-0.408306	-0.0406227	-1.11969	-0.422466	-0.478081	-1.24676	-0.426861	0.107697	-1.03993	-0.740372	-0.816673			9.28484	-1.21674	-0.263195	-0.621098
	9.29508	-1.20203	-1.01723	-0.406105	-0.169575	-0.147438	0.061367	-0.153248	0.340927	-0.0911751	0.0121613	0.0679359	0.0546112			9.29508	-1.20203	-0.566498	-0.491905	-1.28156	-1.25907	-1.07612	-1.25106	-1.008	-1.37948	-0.493999	-0.857773	-0.38694			9.29508	-1.20203	-0.398968	0.00597382	-0.950603	-0.406979	-0.468662	-1.19674	-0.360081	0.102547	-1.01313	-0.767113	-0.823437			9.29508	-1.20203	-0.297638	-0.5308
	9.30532	-1.18117	-0.998543	-0.319275	-0.16259	-0.109123	0.0568733	-0.203793	0.420265	-0.071331	-0.0331612	0.0680428	0.0353088			9.30532	-1.18117	-0.525433	-0.360035	-1.27119	-1.34938	-0.991123	-1.31212	-0.868736	-1.42059	-0.52914	-0.932175	-0.410172			9.30532	-1.18117	-0.361198	-0.0773888	-0.939598	-0.388966	-0.457798	-1.20229	-0.392765	0.00749969	-1.09511	-0.793682	-0.8494			9.30532	-1.18117	-0.296589	-0.487942
	9.31556	-1.16866	-0.994118	-0.263126	-0.222256	-0.156864	0.0442467	-0.198715	0.473297	-0.0733414	0.0545311	0.0258446	-0.0777702			9.31556	-1.16866	-0.464073	-0.206646	-1.20152	-1.27829	-0.986305	-1.36176	-0.968956	-1.31863	-0.559483	-0.945179	-0.34338			9.31556	-1.16866	-0.369751	-0.114105	-0.998867	-0.494404	-0.377823	-1.25036	-0.51115	0.0672112	-1.00069	-0.803162	-0.921818			9.31556	-1.16866	-0.298859	-0.45137
	9.3258	-1.18966	-0.975327	-0.221722	-0.269402	-0.178741	-0.0601196	-0.14072	0.383095	-0.0619926	0.0500793	0.0652313	-0.0931587			9.3258	-1.18966	-0.489689	-0.210667	-1.28692	-1.19849	-1.0158	-1.33852	-1.02037	-1.40975	-0.494965	-0.945297	-0.333984			9.3258	-1.18966	-0.366798	-0.065609	-0.943604	-0.408482	-0.508533	-1.31917	-0.577206	0.169159	-1.07513	-0.875305	-0.955807			9.3258	-1.18966	-0.276268	-0.462063
	9.33604	-1.21802	-0.991199	-0.237576	-0.246513	-0.206398	0.0312195	-0.156815	0.290955	-0.0964928	0.124802	-0.00857162	0.059288			9.33604	-1.21802	-0.480152	-0.329876	-1.36972	-1.27354	-1.11432	-1.22202	-1.05354	-1.46108	-0.548622	-0.920135	-0.360596			9.33604	-1.21802	-0.378212	-0.069973	-0.951969	-0.407337	-0.610497	-1.29223	-0.541016	0.161552	-1.05254	-0.91927	-0.860497			9.33604	-1.21802	-0.279987	-0.504383
	9.34628	-1.21136	-0.9529	-0.298412	-0.181702	-0.123894	-0.0624924	-0.20005	0.423481	-0.186794	0.0832367	-0.0526657	0.0928574			9.34628	-1.21136	-0.45974	-0.25494	-1.34719	-1.3168	-1.15474	-1.22969	-1.16813	-1.46556	-0.501984	-0.87463	-0.40464			9.34628	-1.21136	-0.36842	-0.0881767	-1.00754	-0.430214	-0.54269	-1.18703	-0.486023	0.0973358	-0.988239	-0.861656	-0.909348			9.34628	-1.21136	-0.273849	-0.454754
	9.35652	-1.19413	-0.936363	-0.242226	-0.188042	-0.123192	0.0148277	-0.196011	0.481728	-0.203224	-0.000152588	0.0828972	0.011364			9.35652	-1.19413	-0.459209	-0.280521	-1.33543	-1.18507	-1.12901	-1.29493	-1.11704	-1.47656	-0.51498	-0.847237	-0.401768			9.35652	-1.19413	-0.324921	-0.0359764	-0.934105	-0.456345	-0.501907	-1.24678	-0.501652	0.0946312	-1.0235	-0.850964	-0.864407			9.35652	-1.19413	-0.294247	-0.557892
	9.36676	-1.18562	-0.933502	-0.219028	-0.196587	-0.169693	-0.0227089	-0.141781	0.405277	-0.108952	0.0617142	0.106739	0.0289688			9.36676	-1.18562	-0.493401	-0.315701	-1.34742	-1.14234	-1.06774	-1.27935	-1.11226	-1.45596	-0.545486	-0.87191	-0.377174			9.36676	-1.18562	-0.302223	0.0132217	-0.949562	-0.475285	-0.474648	-1.18487	-0.470657	0.0841026	-1.03313	-0.821384	-0.86462			9.36676	-1.18562	-0.239784	-0.518555
	9.377	-1.16859	-0.921764	-0.227604	-0.259243	-0.149784	-0.103317	-0.111599	0.382309	-0.0308952	0.119366	0.0963058	0.0805283			9.377	-1.16859	-0.47538	-0.291061	-1.31962	-1.12801	-1.05426	-1.37168	-1.06984	-1.4992	-0.471649	-0.881878	-0.333664			9.377	-1.16859	-0.312508	0.0447655	-0.905518	-0.394047	-0.511169	-1.23624	-0.47224	0.14167	-1.01896	-0.878464	-0.827942			9.377	-1.16859	-0.235149	-0.55687
	9.38724	-1.16792	-0.93663	-0.19408	-0.197754	-0.158272	-0.0758286	-0.184982	0.477947	-0.144749	0.171577	-0.0387192	0.0355988			9.38724	-1.16792	-0.434353	-0.261433	-1.3084	-1.05873	-1.14805	-1.42082	-1.03054	-1.56716	-0.505276	-0.906879	-0.305386			9.38724	-1.16792	-0.263195	-0.0479088	-0.892879	-0.366581	-0.55238	-1.32333	-0.546597	0.107601	-1.01902	-0.892735	-0.840992			9.38724	-1.16792	-0.238274	-0.619431
	9.39748	-1.15925	-0.933159	-0.30257	-0.270687	-0.108658	0.0106926	-0.223812	0.480854	-0.0330238	0.234711	-0.0737419	0.0721588			9.39748	-1.15925	-0.423061	-0.185917	-1.31485	-1.15031	-1.18964	-1.21246	-0.987015	-1.52478	-0.496254	-0.844055	-0.279293			9.39748	-1.15925	-0.297638	-0.106514	-0.842464	-0.418041	-0.487816	-1.37722	-0.480671	0.0774269	-1.14212	-0.981117	-0.852592			9.39748	-1.15925	-0.242054	-0.61277
	9.40772	-1.1672	-0.899708	-0.287373	-0.278046	-0.01614	0.00357437	-0.115234	0.426735	-0.0170021	0.196373	0.0360489	-0.0173874			9.40772	-1.1672	-0.423054	-0.244221	-1.24042	-1.17993	-1.09966	-1.19644	-1.04973	-1.38076	-0.44455	-0.809628	-0.280033			9.40772	-1.1672	-0.296589	-0.0696869	-0.965157	-0.300491	-0.533295	-1.26992	-0.49736	0.192295	-1.22426	-0.858093	-0.853264			9.40772	-1.1672	-0.247643	-0.531761
	9.41796	-1.14904	-0.879486	-0.261707	-0.233677	-0.0109177	-0.00947571	-0.151783	0.477104	-0.121563	0.141251	-0.00063324	-0.0115738			9.41796	-1.14904	-0.455849	-0.28368	-1.25215	-1.11739	-1.16278	-1.26867	-0.969814	-1.37513	-0.379032	-0.86618	-0.340828			9.41796	-1.14904	-0.298859	-0.0873299	-1.02985	-0.219906	-0.579201	-1.27207	-0.461407	0.260914	-1.14347	-0.740131	-0.859222			9.41796	-1.14904	-0.225887	-0.46273
	9.4282	-1.14952	-0.894672	-0.2724	-0.15601	-0.146564	-0.151695	-0.280697	0.567448	-0.0930023	0.123539	-0.0865211	-0.0318985			9.4282	-1.14952	-0.454113	-0.23428	-1.25693	-1.08207	-1.1231	-1.35501	-1.02606	-1.35193	-0.366707	-0.843613	-0.289555			9.4282	-1.14952	-0.276268	-0.0536537	-1.00689	-0.306911	-0.465523	-1.33845	-0.425011	0.194599	-1.0368	-0.705433	-0.796566			9.4282	-1.14952	-0.211327	-0.491795
	9.43844	-1.17501	-0.912876	-0.270718	-0.250153	-0.165283	-0.398903	-0.223217	0.570595	-0.0925484	0.177219	-0.108067	0.0392342			9.43844	-1.17501	-0.453136	-0.245483	-1.27843	-1.08368	-1.00975	-1.32018	-0.875687	-1.42471	-0.375351	-0.829449	-0.196285			9.43844	-1.17501	-0.279987	-0.0334358	-1.03295	-0.346943	-0.312927	-1.41859	-0.471191	0.20969	-1.01655	-0.857471	-0.753914			9.43844	-1.17501	-0.194801	-0.530464
	9.44868	-1.17778	-0.87867	-0.271194	-0.257111	-0.00530243	-0.209213	-0.361691	0.576176	-0.0605164	0.181416	-0.0289116	-0.0109901			9.44868	-1.17778	-0.424656	-0.223072	-1.28881	-1.00995	-1.06785	-1.38673	-0.980743	-1.39001	-0.383244	-0.790253	-0.29467			9.44868	-1.17778	-0.273849	-0.154053	-1.08228	-0.381489	-0.323475	-1.34934	-0.47855	0.126659	-1.06781	-0.79472	-0.810642			9.44868	-1.17778	-0.187141	-0.528656
	9.45892	-1.17603	-0.866524	-0.177391	-0.156906	-0.0881195	0.0667191	-0.322445	0.469887	-0.0609589	0.134472	-0.0066185	-0.00229645			9.45892	-1.17603	-0.445747	-0.240261	-1.34133	-0.978191	-1.04683	-1.344	-1.0509	-1.34848	-0.460873	-0.798969	-0.311348			9.45892	-1.17603	-0.294247	-0.0346794	-1.02198	-0.39706	-0.469337	-1.31082	-0.486034	0.0959167	-1.09024	-0.756653	-0.79771			9.45892	-1.17603	-0.17886	-0.438255
	9.46916	-1.15061	-0.861053	-0.145641	-0.180367	-0.159908	0.153503	-0.209373	0.510254	0.000377655	0.0960617	0.00143814	0.0381241			9.46916	-1.15061	-0.406483	-0.211033	-1.40847	-0.992607	-1.02026	-1.3096	-1.01938	-1.59332	-0.299496	-0.974064	-0.300156			9.46916	-1.15061	-0.239784	-0.0868912	-0.99955	-0.40382	-0.52253	-1.32078	-0.444431	0.116611	-1.06371	-0.743366	-0.75309			9.46916	-1.15061	-0.201378	-0.418171
	9.4794	-1.14145	-0.820793	-0.0691833	-0.181915	-0.149117	0.0814056	-0.208992	0.558006	0.0206757	0.119198	-0.0230942	0.0419617			9.4794	-1.14145	-0.408306	-0.227222	-1.41176	-0.893841	-1.12252	-1.32143	-1.01485	-1.85506	-0.296364	-0.97789	-0.241798			9.4794	-1.14145	-0.235149	0.0609894	-1.03153	-0.358891	-0.440456	-1.38297	-0.427132	0.145138	-1.02523	-0.797798	-0.769341			9.4794	-1.14145	-0.163094	-0.419983
	9.48964	-1.11761	-0.820248	-0.106224	-0.1418	-0.139355	0.0851364	-0.293343	0.462318	0.100044	0.180176	0.0352364	-0.0122643			9.48964	-1.11761	-0.398968	-0.287029	-1.39751	-0.867176	-1.11281	-1.33694	-0.986824	-1.5924	-0.397892	-0.870903	-0.309761			9.48964	-1.11761	-0.238274	0.104248	-0.977329	-0.307358	-0.455009	-1.30906	-0.388531	0.297153	-0.995094	-0.73843	-0.711784			9.48964	-1.11761	-0.156918	-0.448738
	9.49988	-1.12561	-0.833721	-0.192818	-0.0620728	-0.112007	0.00831604	-0.259121	0.465992	0.0587502	0.18325	-0.0138206	0.0725746			9.49988	-1.12561	-0.361198	-0.23801	-1.26121	-0.860699	-1.07271	-1.34704	-0.866009	-1.56873	-0.429504	-0.880592	-0.241131			9.49988	-1.12561	-0.242054	0.105824	-1.00357	-0.256336	-0.44141	-1.19428	-0.365681	0.348557	-0.949959	-0.798512	-0.735413			9.49988	-1.12561	-0.143089	-0.42704
	9.51012	-1.10554	-0.827332	-0.119694	-0.157463	-0.0882492	0.195061	-0.187023	0.490772	0.050518	0.208382	0.0868416	0.0860939			9.51012	-1.10554	-0.369751	-0.231766	-1.31028	-0.952038	-1.05318	-1.30078	-0.931438	-1.47256	-0.445526	-0.888641	-0.211617			9.51012	-1.10554	-0.247643	0.0175362	-0.99641	-0.216496	-0.500641	-1.25214	-0.404148	0.205185	-0.979713	-0.795731	-0.7528			9.51012	-1.10554	-0.132324	-0.450001
	9.52036	-1.10853	-0.816292	-0.205059	-0.133492	-0.130138	0.167072	-0.120457	0.515759	-0.0269127	0.277031	0.0317574	0.0535507			9.52036	-1.10853	-0.366798	-0.216076	-1.34018	-0.989349	-1.12252	-1.24447	-0.985703	-1.31028	-0.382561	-0.878803	-0.192722			9.52036	-1.10853	-0.225887	-0.0450478	-0.916367	-0.258385	-0.51458	-1.28795	-0.486023	0.181248	-0.977665	-0.758278	-0.704632			9.52036	-1.10853	-0.117699	-0.39999
	9.5306	-1.1105	-0.815727	-0.262089	-0.121178	-0.107346	0.180267	-0.127403	0.608521	0.0155869	0.164177	-0.00163651	0.0628853			9.5306	-1.1105	-0.378212	-0.236176	-1.30213	-0.876877	-1.16727	-1.27922	-1.00038	-1.32325	-0.342411	-0.843899	-0.236618			9.5306	-1.1105	-0.211327	-0.0732536	-0.933292	-0.271152	-0.383236	-1.22034	-0.510929	0.231007	-1.03794	-0.775051	-0.668152			9.5306	-1.1105	-0.111893	-0.340469
	9.54084	-1.09948	-0.803326	-0.23933	-0.231079	-0.0380363	0.0887604	-0.0378532	0.55397	-0.0304413	0.177769	-0.05373	0.131931			9.54084	-1.09948	-0.36842	-0.171303	-1.3275	-0.835594	-1.11937	-1.40898	-0.98439	-1.43502	-0.380142	-0.781948	-0.260269			9.54084	-1.09948	-0.194801	0.000606537	-0.91367	-0.288673	-0.416576	-1.32648	-0.527531	0.152851	-1.03012	-0.859459	-0.827568			9.54084	-1.09948	-0.116901	-0.426502
	9.55108	-1.05559	-0.784462	-0.280079	-0.216583	-0.0931587	0.0717773	-0.0342064	0.55423	0.0658302	0.244537	0.0374069	0.0963593			9.55108	-1.05559	-0.324921	-0.184402	-1.31481	-0.799297	-1.04825	-1.3203	-0.962997	-1.40359	-0.337086	-0.732796	-0.152775			9.55108	-1.05559	-0.187141	0.00703812	-0.960236	-0.257599	-0.450375	-1.40151	-0.534801	0.19355	-0.971504	-0.846172	-0.784668			9.55108	-1.05559	-0.109097	-0.491207
	9.56132	-1.06779	-0.779808	-0.35289	-0.164486	-0.0651855	0.102421	-0.0596466	0.522091	0.125462	0.18256	0.123955	0.0530472			9.56132	-1.06779	-0.302223	-0.290451	-1.23856	-0.925659	-1.08488	-1.31623	-0.928734	-1.4073	-0.312824	-0.744049	-0.198051			9.56132	-1.06779	-0.17886	0.0297813	-0.959339	-0.340244	-0.383499	-1.27015	-0.491718	0.22533	-0.970528	-0.666092	-0.690876			9.56132	-1.06779	-0.110744	-0.364296
	9.57156	-1.06827	-0.749828	-0.186092	-0.030304	-0.0691185	0.160141	-0.0846939	0.338783	0.099678	0.303131	0.109921	0.118256			9.57156	-1.06827	-0.312508	-0.236176	-1.22827	-0.944408	-1.10903	-1.24262	-0.871048	-1.36917	-0.397762	-0.776581	-0.235996			9.57156	-1.06827	-0.201378	-0.0947342	-0.958683	-0.277721	-0.295006	-1.29633	-0.427036	0.267136	-0.96299	-0.643097	-0.665699			9.57156	-1.06827	-0.0992241	-0.351734
	9.5818	-1.05801	-0.766777	-0.129898	-0.0581131	-0.125801	0.0733109	-0.180874	0.402679	0.060173	0.405052	0.14201	0.0539703			9.5818	-1.05801	-0.263195	-0.170658	-1.27491	-0.924015	-1.09121	-1.2004	-0.850067	-1.3499	-0.403915	-0.620155	-0.22789			9.5818	-1.05801	-0.163094	-0.0200157	-0.952423	-0.237381	-0.373222	-1.32703	-0.446842	0.253868	-1.00985	-0.732742	-0.701111			9.5818	-1.05801	-0.0935326	-0.375957
	9.59204	-1.0526	-0.754379	-0.161846	-0.14957	-0.131042	0.0667915	-0.128502	0.489056	0.104496	0.304138	0.157047	0.0816498			9.59204	-1.0526	-0.297638	-0.113331	-1.3275	-0.861263	-1.07589	-1.16162	-0.863934	-1.26012	-0.321659	-0.611629	-0.306618			9.59204	-1.0526	-0.156918	0.0695496	-1.00156	-0.261639	-0.403667	-1.33747	-0.43549	0.224602	-1.0374	-0.731407	-0.686737			9.59204	-1.0526	-0.0940628	-0.360149
	9.60228	-1.04986	-0.756512	-0.101559	-0.165833	-0.145802	0.13274	-0.213558	0.474396	0.224419	0.21508	0.133991	0.148098			9.60228	-1.04986	-0.296589	-0.0918846	-1.38092	-0.729282	-1.15942	-1.22985	-0.894333	-1.22516	-0.30471	-0.679459	-0.263031			9.60228	-1.04986	-0.143089	-0.0490074	-1.01484	-0.294586	-0.28434	-1.24601	-0.405437	0.258804	-1.04942	-0.714191	-0.636288			9.60228	-1.04986	-0.114758	-0.341839
	9.61252	-1.07085	-0.75753	-0.141041	-0.182976	-0.135445	0.174129	-0.184017	0.491028	0.191933	0.288071	-0.0286827	0.204147			9.61252	-1.07085	-0.298859	-0.25761	-1.40582	-0.705849	-1.07143	-1.29776	-0.828098	-1.21548	-0.320263	-0.768143	-0.26165			9.61252	-1.07085	-0.132324	-0.12225	-0.968842	-0.27467	-0.379787	-1.2288	-0.323578	0.270153	-1.04906	-0.679062	-0.620811			9.61252	-1.07085	-0.095974	-0.326786
	9.62276	-1.02904	-0.737747	-0.207527	-0.136696	-0.100025	0.201141	-0.0916786	0.495731	0.180775	0.274624	-0.0114326	0.245705			9.62276	-1.02904	-0.276268	-0.240906	-1.44474	-0.777184	-1.11665	-1.15834	-0.70858	-1.31296	-0.336357	-0.793854	-0.330109			9.62276	-1.02904	-0.117699	-0.202843	-0.936619	-0.239273	-0.438072	-1.20032	-0.341175	0.173569	-1.04556	-0.763355	-0.641006			9.62276	-1.02904	-0.103043	-0.330292
	9.633	-1.04307	-0.70507	-0.22382	-0.143013	-0.0158768	0.131058	-0.0858955	0.423252	0.160889	0.324764	0.0830269	0.187984			9.633	-1.04307	-0.279987	-0.208305	-1.40562	-0.799118	-1.13461	-1.22503	-0.77475	-1.22278	-0.454231	-0.74778	-0.286709			9.633	-1.04307	-0.111893	-0.17905	-0.899391	-0.223625	-0.351002	-1.32499	-0.412724	0.217972	-1.10471	-0.758266	-0.656792			9.633	-1.04307	-0.114155	-0.397141
	9.64324	-1.03277	-0.745831	-0.190372	-0.188042	-0.150085	0.130714	-0.176472	0.490166	0.248928	0.304379	0.113106	0.118988			9.64324	-1.03277	-0.273849	-0.268291	-1.5101	-0.774441	-1.11167	-1.20293	-0.852276	-1.28864	-0.311695	-0.702015	-0.260231			9.64324	-1.03277	-0.116901	-0.112377	-0.928345	-0.185104	-0.320995	-1.38792	-0.428864	0.166203	-1.11999	-0.764107	-0.683197			9.64324	-1.03277	-0.127319	-0.334579
	9.65348	-1.02039	-0.766811	-0.181812	-0.230625	-0.130901	0.115654	-0.155788	0.490906	0.264435	0.333099	0.0725136	0.213852			9.65348	-1.02039	-0.294247	-0.247837	-1.40255	-0.718449	-1.06215	-1.16509	-0.831589	-1.2072	-0.330528	-0.754051	-0.309479			9.65348	-1.02039	-0.109097	0.00605774	-0.931561	-0.199856	-0.365601	-1.29695	-0.354679	0.112259	-1.08598	-0.723267	-0.696083			9.65348	-1.02039	-0.143517	-0.214714
	9.66372	-1.01468	-0.778084	-0.132687	-0.221024	-0.0792122	0.189491	-0.113888	0.539246	0.173336	0.385551	0.00610352	0.16761			9.66372	-1.01468	-0.239784	-0.267456	-1.22223	-0.805672	-0.997593	-1.11265	-0.922539	-1.15611	-0.35326	-0.719753	-0.304756			9.66372	-1.01468	-0.110744	-0.0736809	-0.91584	-0.189873	-0.291946	-1.32426	-0.307186	0.142838	-0.991943	-0.665863	-0.690456			9.66372	-1.01468	-0.140614	-0.19606
	9.67396	-1.0284	-0.703312	-0.185593	-0.291542	-0.00148773	0.166748	-0.182064	0.554504	0.178165	0.401787	-0.0558853	0.247337			9.67396	-1.0284	-0.235149	-0.128899	-1.23604	-0.790977	-1.04577	-1.1614	-0.98455	-1.19464	-0.398346	-0.679283	-0.346561			9.67396	-1.0284	-0.0992241	-0.113007	-0.946453	-0.155087	-0.322712	-1.40477	-0.375935	0.19442	-0.989441	-0.671276	-0.701675			9.67396	-1.0284	-0.123924	-0.219543
	9.6842	-1.02243	-0.671837	-0.132435	-0.211777	-0.0161171	0.145638	-0.202698	0.503258	0.17815	0.387959	0.01297	0.199604			9.6842	-1.02243	-0.238274	-0.125893	-1.22364	-0.719746	-1.06343	-1.14435	-0.932964	-1.16898	-0.310558	-0.68771	-0.193222			9.6842	-1.02243	-0.0935326	-0.119255	-0.959599	-0.233089	-0.375034	-1.40356	-0.475998	0.202049	-1.04418	-0.620579	-0.733849			9.6842	-1.02243	-0.10685	-0.215836
	9.69444	-1.01958	-0.677864	-0.163548	-0.18454	-0.0983009	0.119087	-0.205414	0.481346	0.226669	0.430214	0.0995636	0.185707			9.69444	-1.01958	-0.242054	-0.14677	-1.26274	-0.782154	-1.03967	-1.13325	-0.930962	-1.17105	-0.251717	-0.768772	-0.270138			9.69444	-1.01958	-0.0940628	0.00367355	-0.889004	-0.147816	-0.347378	-1.34229	-0.452465	0.228966	-1.05072	-0.648579	-0.698277			9.69444	-1.01958	-0.102222	-0.114162
	9.70468	-1.00205	-0.669777	-0.102673	-0.118721	-0.0701904	0.167717	-0.148289	0.6189	0.162289	0.505211	0.0768509	0.222992			9.70468	-1.00205	-0.247643	-0.0830154	-1.32909	-0.873596	-1.09039	-1.11429	-0.946434	-1.21595	-0.277576	-0.762825	-0.269016			9.70468	-1.00205	-0.114758	-0.00257111	-0.83939	-0.163685	-0.300053	-1.31236	-0.393528	0.208214	-0.958961	-0.655422	-0.681576			9.70468	-1.00205	-0.108772	-0.186378
	9.71492	-0.970428	-0.673164	-0.128994	-0.0718689	-0.0755081	0.146473	-0.09338	0.682796	0.201698	0.539387	0.138912	0.283527			9.71492	-0.970428	-0.225887	-0.172741	-1.31195	-0.81823	-1.02763	-1.08572	-0.972591	-1.23832	-0.23777	-0.750977	-0.285408			9.71492	-0.970428	-0.095974	-0.107594	-0.887135	-0.144062	-0.258862	-1.39394	-0.264484	0.305107	-1.01637	-0.625286	-0.690304			9.71492	-0.970428	-0.115219	-0.320301
	9.72516	-0.981651	-0.618034	-0.0974731	-0.0968552	-0.108871	0.0761261	-0.0982475	0.668564	0.225086	0.606335	0.131153	0.252869			9.72516	-0.981651	-0.211327	-0.168903	-1.27164	-0.696659	-0.986221	-1.19341	-1.00795	-1.23122	-0.253616	-0.622658	-0.209961			9.72516	-0.981651	-0.103043	-0.0642166	-0.899246	-0.0362854	-0.17617	-1.3485	-0.381012	0.338757	-0.999138	-0.712158	-0.673923			9.72516	-0.981651	-0.100788	-0.297054
	9.7354	-0.983459	-0.638783	-0.075779	-0.0910301	-0.127937	0.163528	-0.0856705	0.608124	0.158947	0.546555	0.245617	0.27639			9.7354	-0.983459	-0.194801	-0.0854721	-1.27742	-0.61718	-1.00193	-1.29902	-1.00211	-1.23301	-0.251015	-0.597565	-0.192162			9.7354	-0.983459	-0.114155	-0.112553	-0.842251	-0.193943	-0.192703	-1.33931	-0.468307	0.350296	-1.01247	-0.75872	-0.727257			9.7354	-0.983459	-0.102123	-0.25893
	9.74564	-0.961861	-0.636684	0.035778	-0.0783691	-0.109489	0.251957	-0.0841064	0.531677	0.187679	0.534191	0.344517	0.417702			9.74564	-0.961861	-0.187141	-0.12989	-1.31023	-0.665924	-1.00801	-1.17169	-0.904259	-1.12834	-0.205883	-0.705307	-0.194782			9.74564	-0.961861	-0.127319	-0.165676	-0.762287	-0.243366	-0.200249	-1.32348	-0.465771	0.261879	-0.961014	-0.700413	-0.634666			9.74564	-0.961861	-0.106102	-0.306854
	9.75588	-0.943844	-0.632908	0.120625	-0.145374	-0.0737762	0.241348	0.0279503	0.548557	0.251274	0.505985	0.186069	0.305679			9.75588	-0.943844	-0.17886	-0.180443	-1.27874	-0.610909	-1.02396	-1.07941	-0.925072	-1.14371	-0.235855	-0.62925	-0.220341			9.75588	-0.943844	-0.143517	-0.270901	-0.825359	-0.213421	-0.176361	-1.27565	-0.389797	0.245857	-1.02005	-0.762997	-0.632664			9.75588	-0.943844	-0.0942116	-0.329384
	9.76612	-0.941563	-0.628624	0.0476418	-0.215591	-0.00407791	0.139641	-0.0653419	0.584663	0.295284	0.567654	0.19202	0.284042			9.76612	-0.941563	-0.201378	-0.116394	-1.23057	-0.55151	-1.04379	-1.16307	-0.827106	-1.2081	-0.245724	-0.607544	-0.151367			9.76612	-0.941563	-0.140614	-0.151001	-0.814846	-0.236832	-0.205002	-1.2626	-0.271469	0.306953	-1.03133	-0.711739	-0.635704			9.76612	-0.941563	-0.0736313	-0.219219
	9.77636	-0.948429	-0.584236	0.0493431	-0.171471	0.0585785	0.179886	-0.152809	0.596718	0.282745	0.459961	0.188908	0.230839			9.77636	-0.948429	-0.163094	-0.0689125	-1.37547	-0.625168	-0.996403	-1.22427	-0.911213	-1.12343	-0.255928	-0.618713	-0.238388			9.77636	-0.948429	-0.123924	-0.230728	-0.794304	-0.258984	-0.248291	-1.35038	-0.254292	0.319412	-1.0029	-0.661396	-0.552567			9.77636	-0.948429	-0.0641251	-0.284355
	9.7866	-0.961693	-0.579323	0.0678368	-0.153721	0.0612717	0.203049	-0.0988083	0.579384	0.288467	0.406803	0.221333	0.273346			9.7866	-0.961693	-0.156918	-0.0674095	-1.4024	-0.650581	-0.969913	-1.13046	-0.862003	-1.09006	-0.288147	-0.708595	-0.310989			9.7866	-0.961693	-0.10685	-0.179192	-0.853386	-0.124203	-0.148453	-1.32617	-0.246243	0.264393	-1.06609	-0.645908	-0.589771			9.7866	-0.961693	-0.060173	-0.203484
	9.79684	-0.972973	-0.590618	0.129238	-0.134075	0.00287628	0.268478	-0.00191498	0.574886	0.33099	0.449615	0.194118	0.293327			9.79684	-0.972973	-0.143089	-0.0238495	-1.33175	-0.671898	-1.02155	-1.12953	-0.750526	-1.12021	-0.232906	-0.653591	-0.217854			9.79684	-0.972973	-0.102222	-0.146839	-0.8009	-0.188957	-0.0811615	-1.29919	-0.309948	0.719536	-0.946003	-0.629997	-0.649773			9.79684	-0.972973	-0.038868	-0.201687
	9.80708	-0.962608	-0.57111	-0.00482559	-0.13522	-0.040699	0.253139	-0.105686	0.566994	0.253101	0.509991	0.181519	0.308372			9.80708	-0.962608	-0.132324	-0.00546646	-1.27538	-0.642689	-0.980499	-1.15563	-0.82172	-1.08284	-0.175892	-0.633057	-0.104519			9.80708	-0.962608	-0.108772	-0.142239	-0.772514	-0.183308	-0.181366	-1.32309	-0.394493	0.744091	-0.963371	-0.542927	-0.599213			9.80708	-0.962608	-0.0458984	-0.24659
	9.81732	-0.933594	-0.583096	-0.0770988	-0.11771	0.0626564	0.359379	-0.157986	0.567497	0.304417	0.481331	0.252972	0.360909			9.81732	-0.933594	-0.117699	-0.113472	-1.23653	-0.698479	-0.905518	-1.16831	-0.846291	-1.06509	-0.102898	-0.619202	-0.118431			9.81732	-0.933594	-0.115219	-0.174614	-0.825825	-0.238583	-0.117409	-1.2989	-0.388119	0.444496	-0.945145	-0.564121	-0.554604			9.81732	-0.933594	-0.0792923	-0.263939
	9.82756	-0.9245	-0.585247	0.0315971	-0.0565796	0.0372658	0.311157	-0.139076	0.544464	0.361416	0.496819	0.297619	0.374008			9.82756	-0.9245	-0.111893	-0.0772324	-1.34304	-0.733875	-0.972359	-1.1788	-0.850964	-0.996017	-0.0317307	-0.620132	-0.155602			9.82756	-0.9245	-0.100788	-0.122318	-0.755505	-0.22205	-0.103699	-1.17602	-0.425144	0.318314	-0.886913	-0.618561	-0.589699			9.82756	-0.9245	-0.0694008	-0.172314
	9.8378	-0.930611	-0.581123	0.0388794	-0.0382195	0.179173	0.294373	-0.174419	0.560009	0.160603	0.511326	0.2565	0.362446			9.8378	-0.930611	-0.116901	-0.0396805	-1.37234	-0.67086	-0.984375	-1.15474	-0.794659	-1.13395	-0.00943756	-0.652233	-0.0913315			9.8378	-0.930611	-0.102123	-0.0530434	-0.787716	-0.258274	-0.111664	-1.14272	-0.459343	0.277237	-0.880547	-0.590397	-0.551712			9.8378	-0.930611	-0.0509872	-0.236671
	9.84804	-0.927341	-0.563148	6.48499e-05	-0.0361328	0.0633469	0.269329	-0.185913	0.626171	0.284748	0.489986	0.181675	0.29258			9.84804	-0.927341	-0.109097	-0.0792351	-1.28817	-0.582153	-1.07583	-1.12476	-0.822735	-1.07875	-0.0602188	-0.592915	-0.0663147			9.84804	-0.927341	-0.106102	-0.0530357	-0.740173	-0.299831	-0.188194	-1.18352	-0.312874	0.25605	-0.844952	-0.616131	-0.554691			9.84804	-0.927341	-0.0281677	-0.163597
	9.85828	-0.916389	-0.547447	0.139706	-0.00226593	-0.041996	0.346657	-0.169212	0.547817	0.237175	0.585571	0.119877	0.13652			9.85828	-0.916389	-0.110744	-0.0946121	-1.26675	-0.550629	-1.07888	-1.00088	-0.882778	-1.01849	-0.0543213	-0.536018	-0.139507			9.85828	-0.916389	-0.0942116	0.0178452	-0.828922	-0.303886	-0.144386	-1.25518	-0.305435	0.259602	-0.900963	-0.639629	-0.548016			9.85828	-0.916389	-0.0261078	-0.160973
	9.86852	-0.92675	-0.550652	0.213257	-0.0717888	-0.0486946	0.322495	-0.0976868	0.588882	0.246838	0.522831	0.194622	0.172497			9.86852	-0.92675	-0.0992241	-0.100334	-1.25922	-0.542519	-0.977272	-1.04	-0.921783	-1.08096	-0.0880089	-0.548664	-0.0685425			9.86852	-0.92675	-0.0736313	0.0545044	-0.85545	-0.249325	-0.117424	-1.25468	-0.324875	0.29224	-0.898499	-0.648888	-0.553902			9.86852	-0.92675	-0.04179	-0.114925
	9.87876	-0.914959	-0.52916	0.179371	-0.126923	-0.023468	0.19178	-0.0988579	0.612595	0.32217	0.547897	0.353371	0.353043			9.87876	-0.914959	-0.0935326	0.0475807	-1.25458	-0.527023	-0.830025	-1.09595	-0.850391	-1.1442	-0.209396	-0.492722	-0.0961151			9.87876	-0.914959	-0.0641251	-0.0231247	-0.807743	-0.169273	-0.0834236	-1.25882	-0.25732	0.29372	-0.838211	-0.61599	-0.544533			9.87876	-0.914959	-0.0327034	-0.140461
	9.889	-0.875122	-0.531834	0.226383	-0.0643768	-0.0129929	0.257694	-0.222454	0.706303	0.302654	0.512875	0.345661	0.427666			9.889	-0.875122	-0.0940628	0.0594292	-1.18972	-0.542671	-0.862171	-1.00972	-0.875114	-1.14442	-0.133049	-0.42297	-0.117271			9.889	-0.875122	-0.060173	-0.104923	-0.742344	-0.112759	-0.0674286	-1.27537	-0.212212	0.309971	-0.982979	-0.617073	-0.59515			9.889	-0.875122	-0.0408325	-0.126465
	9.89924	-0.859074	-0.566498	0.157219	0.0898247	0.0679169	0.342953	-0.131504	0.599148	0.363918	0.507488	0.314602	0.35564			9.89924	-0.859074	-0.114758	0.0885887	-1.10515	-0.547169	-0.866192	-1.05469	-0.953579	-1.11388	-0.11763	-0.447693	-0.143585			9.89924	-0.859074	-0.038868	-0.0933876	-0.884869	-0.193497	0.0278358	-1.31437	-0.261185	0.407269	-0.993279	-0.528763	-0.515743			9.89924	-0.859074	0.00405502	-0.126633
	9.90948	-0.867508	-0.525433	0.288158	-0.0130043	0.105324	0.233303	-0.105206	0.538376	0.259308	0.440578	0.249062	0.3433			9.90948	-0.867508	-0.095974	0.0571251	-1.07973	-0.399757	-0.856224	-1.00242	-0.818501	-1.00783	-0.132809	-0.445633	-0.125309			9.90948	-0.867508	-0.0458984	-0.120781	-0.86694	-0.216282	-0.133503	-1.29955	-0.290676	0.341309	-0.933006	-0.529846	-0.42395			9.90948	-0.867508	0.0412788	-0.0546303
	9.91972	-0.848434	-0.464073	0.199207	-0.0170364	0.0806084	0.246037	-0.120945	0.548603	0.222797	0.556007	0.361584	0.322723			9.91972	-0.848434	-0.103043	0.0415344	-1.2324	-0.482845	-0.895599	-0.900311	-0.794579	-1.03797	-0.130352	-0.479897	-0.0287857			9.91972	-0.848434	-0.0792923	-0.109119	-0.832428	-0.179611	-0.136543	-1.40108	-0.240059	0.327278	-0.993889	-0.540852	-0.51466			9.91972	-0.848434	0.0607872	0.0180779
	9.92996	-0.868286	-0.489689	0.172703	-0.107418	0.146248	0.375427	-0.130814	0.584629	0.272205	0.616684	0.4016	0.372021			9.92996	-0.868286	-0.114155	0.0347519	-1.21286	-0.430019	-0.887436	-0.938911	-0.760292	-1.14832	-0.0370102	-0.50296	-0.0565948			9.92996	-0.868286	-0.0694008	-0.112904	-0.847378	-0.175785	-0.144611	-1.30596	-0.272495	0.325191	-0.939102	-0.528122	-0.552147			9.92996	-0.868286	0.0311203	0.0101967
	9.9402	-0.870468	-0.480152	0.245445	-0.153099	0.167107	0.42207	-0.0671463	0.593151	0.310593	0.581341	0.298893	0.368038			9.9402	-0.870468	-0.127319	0.0191917	-1.13916	-0.404938	-0.875824	-0.998993	-0.798996	-1.13716	-0.0282707	-0.488571	-0.117718			9.9402	-0.870468	-0.0509872	-0.0318871	-0.889481	-0.0915871	-0.107956	-1.26344	-0.202271	0.294506	-0.934986	-0.597286	-0.529976			9.9402	-0.870468	-0.000785828	-0.0657654
	9.95044	-0.873142	-0.45974	0.294239	-0.0858307	0.119709	0.417633	-0.0688133	0.587692	0.274139	0.568428	0.38097	0.265686			9.95044	-0.873142	-0.143517	-0.0488739	-1.11267	-0.420689	-0.864738	-0.98848	-0.820469	-1.1041	-0.0639648	-0.503021	-0.0937805			9.95044	-0.873142	-0.0281677	-0.00926208	-0.931408	-0.0397301	-0.140106	-1.33468	-0.121838	0.366402	-0.953465	-0.580933	-0.440594			9.95044	-0.873142	0.0148354	-0.11755
	9.96068	-0.843124	-0.459209	0.309593	-0.0453262	0.0399094	0.356956	-0.103958	0.56094	0.309902	0.625694	0.398136	0.320045			9.96068	-0.843124	-0.140614	-0.0691719	-1.22659	-0.343941	-0.875656	-0.97123	-0.754555	-1.10748	-0.0293198	-0.485401	-0.0952682			9.96068	-0.843124	-0.0261078	0.0246544	-0.814548	-0.0179253	-0.14563	-1.21293	-0.126461	0.362526	-0.907856	-0.542377	-0.447617			9.96068	-0.843124	0.0183258	-0.143463
	9.97092	-0.827499	-0.493401	0.274403	-0.0838852	0.0741234	0.314972	-0.10918	0.639523	0.285107	0.732887	0.334858	0.388733			9.97092	-0.827499	-0.123924	-0.00383759	-1.31144	-0.329063	-0.874905	-0.936111	-0.783047	-1.09314	-0.0374908	-0.392334	0.0438728			9.97092	-0.827499	-0.04179	-0.045414	-0.716118	-0.147434	-0.156811	-1.19083	-0.12302	0.364784	-0.955254	-0.483784	-0.608704			9.97092	-0.827499	0.0304184	-0.133499
	9.98116	-0.843094	-0.47538	0.280579	0.0321732	0.00143051	0.332855	-0.216095	0.585487	0.261944	0.689915	0.376495	0.391068			9.98116	-0.843094	-0.10685	0.0116615	-1.21586	-0.396378	-0.849773	-0.945316	-0.736916	-1.1055	0.00165939	-0.464287	-0.0523529			9.98116	-0.843094	-0.0327034	-0.0924339	-0.773388	-0.187458	-0.190071	-1.30412	-0.0941238	0.370251	-0.955894	-0.47636	-0.527878			9.98116	-0.843094	0.0346794	-0.0956497
	9.9914	-0.851364	-0.434353	0.363293	0.0512733	-0.0485992	0.360359	-0.214092	0.569965	0.301022	0.60183	0.445652	0.384895			9.9914	-0.851364	-0.102222	0.0401192	-1.20865	-0.385952	-0.838081	-0.965279	-0.778366	-1.09565	-0.00392914	-0.428024	-0.0690536			9.9914	-0.851364	-0.0408325	-0.108467	-0.736408	-0.225365	-0.142513	-1.34627	-0.202305	0.387123	-0.904625	-0.613403	-0.49836			9.9914	-0.851364	0.0487976	-0.0956879
[truncated: 35 more columns]

## Sheet: panel C
			Binaural traces												Mon. Contra
	ITD (ms)	Time from contralatera click (ms)	Vm rel (mV)	Vm rel (mV)	Vm rel (mV)	Vm rel (mV)	Vm rel (mV)	Vm rel (mV)	Vm rel (mV)	Vm rel (mV)	Vm rel (mV)	Vm rel (mV)		Time from contralatera click (ms)	Vm rel (mV)
	-1.5	4.00627	-0.166298	0.138561	0.138725	0.311638	-0.0603943	0.445274	-0.098114	0.0190926	-0.260971	0.482594		4.001	0.0763
	-1.5	4.01651	-0.313316	0.158112	0.0985832	0.201809	-0.0222855	0.426121	0.0210457	0.0576897	-0.255821	0.442936		4.0112	0.0837
	-1.5	4.02675	-0.217236	0.132671	0.115551	0.264313	-0.0987206	0.470631	0.2062	0.160439	-0.142197	0.373589		4.0215	0.0807
	-1.5	4.03699	-0.101807	0.152916	0.0804901	0.303879	-0.0711861	0.487377	0.223282	0.216801	-0.0963669	0.439716		4.0317	0.0515
	-1.5	4.04723	0.0216942	0.161953	0.111961	0.307476	-0.0177307	0.315136	0.132683	0.197262	-0.167461	0.455868		4.0419	0.0379
	-1.5	4.05747	0.0338211	0.225681	0.0841866	0.394897	0.0717468	0.351852	0.0919113	0.258915	-0.241539	0.393749		4.0522	0.0367
	-1.5	4.06771	0.0188484	0.344803	0.117443	0.355446	0.0624504	0.449303	0.108261	0.199657	-0.254589	0.42646		4.0624	0.0458
	-1.5	4.07795	0.0454407	0.319973	0.164196	0.458244	0.0450096	0.489182	0.134853	0.216572	-0.168209	0.499725		4.0727	0.0644
	-1.5	4.08819	0.0534172	0.24543	0.194469	0.49485	0.0959702	0.418968	0.173561	0.178593	-0.0816536	0.501644		4.0829	0.0479
	-1.5	4.09843	-0.0156517	0.270084	0.217007	0.561764	0.134155	0.411514	0.292248	0.100201	-0.0985451	0.520813		4.0931	0.0627
	-1.5	4.10867	0.0351791	0.228352	0.263226	0.490154	0.256176	0.553745	0.344635	0.10144	-0.0665855	0.504383		4.1034	0.0754
	-1.5	4.11891	0.0620499	0.23785	0.359486	0.519718	0.280651	0.615471	0.437111	0.238949	-0.027092	0.415623		4.1136	0.0965
	-1.5	4.12915	-0.0160332	0.503281	0.269592	0.570229	0.244831	0.521328	0.391571	0.359364	0.0190544	0.437366		4.1239	0.1194
	-1.5	4.13939	0.0485306	0.550549	0.236713	0.636105	0.25761	0.482159	0.393463	0.373928	-0.0222511	0.473049		4.1341	0.1413
	-1.5	4.14963	0.184715	0.51067	0.284267	0.695732	0.289745	0.444107	0.411789	0.403149	0.0684776	0.57769		4.1443	0.1048
	-1.5	4.15987	0.256958	0.581005	0.303432	0.690472	0.309139	0.518875	0.411003	0.492558	0.168007	0.534187		4.1546	0.118
	-1.5	4.17011	0.304722	0.579384	0.334824	0.725544	0.465984	0.590374	0.500671	0.528114	0.178165	0.659298		4.1648	0.1229
	-1.5	4.18035	0.298737	0.602669	0.335884	0.723305	0.440891	0.678829	0.619797	0.522289	0.109665	0.750042		4.1751	0.1062
	-1.5	4.19059	0.236103	0.703957	0.35722	0.652794	0.403496	0.719707	0.612492	0.600044	0.171463	0.790287		4.1853	0.1217
	-1.5	4.20083	0.301884	0.724392	0.460804	0.72327	0.45908	0.736004	0.579826	0.562946	0.266819	0.834705		4.1955	0.1117
	-1.5	4.21107	0.353622	0.721043	0.419807	0.855125	0.488541	0.771873	0.696781	0.569683	0.272675	0.833157		4.2058	0.0906
	-1.5	4.22131	0.399864	0.79953	0.527584	0.870087	0.482224	0.740429	0.820114	0.683613	0.358505	0.966942		4.216	0.0902
	-1.5	4.23155	0.377892	0.961273	0.50256	0.901569	0.494812	0.929836	0.924557	0.666134	0.410694	1.00553		4.2263	0.1091
	-1.5	4.24179	0.47612	0.982048	0.638474	0.907673	0.47744	0.959415	1.06842	0.645512	0.336437	1.07404		4.2365	0.1359
	-1.5	4.25203	0.445068	1.08437	0.67017	0.965599	0.581318	0.921268	1.16278	0.713177	0.398067	1.11791		4.2467	0.1322
	-1.5	4.26227	0.490448	1.13534	0.709213	0.998142	0.569935	0.995441	1.12266	0.773209	0.516983	1.18793		4.257	0.1272
	-1.5	4.27251	0.5602	1.18089	0.717987	1.03453	0.672409	0.992588	1.14999	0.792831	0.520485	1.3366		4.2672	0.1124
	-1.5	4.28275	0.608276	1.21325	0.745628	1.12007	0.689823	1.10958	1.15746	0.821011	0.534721	1.41777		4.2775	0.0913
	-1.5	4.29299	0.585529	1.32273	0.803375	1.19548	0.630314	1.25665	1.17684	0.793667	0.59214	1.50937		4.2877	0.1404
	-1.5	4.30323	0.653206	1.37416	0.845791	1.25568	0.68848	1.33176	1.28223	0.934593	0.662846	1.48634		4.2979	0.1627
	-1.5	4.31347	0.712551	1.38735	0.900543	1.28989	0.680824	1.33926	1.26827	0.945789	0.722069	1.53946		4.3082	0.1585
	-1.5	4.32371	0.79126	1.51484	0.904415	1.46574	0.703983	1.30589	1.39683	1.00903	0.777645	1.79212		4.3184	0.1525
	-1.5	4.33395	0.803886	1.51185	0.992153	1.48791	0.789078	1.37978	1.46453	1.01119	0.810116	1.9645		4.3287	0.1506
	-1.5	4.34419	0.774063	1.61629	1.08599	1.50678	0.926571	1.52024	1.54808	1.10813	0.801487	2.08271		4.3389	0.1465
	-1.5	4.35443	0.809025	1.77906	1.08229	1.62416	0.919277	1.58305	1.69043	1.19589	0.878185	2.25459		4.3491	0.1439
	-1.5	4.36467	0.858566	1.89139	1.04127	1.72066	0.913952	1.66092	1.79164	1.25563	0.945801	2.42992		4.3594	0.1444
	-1.5	4.37491	0.929703	1.99627	1.12268	1.81709	0.894947	1.62701	1.81753	1.3851	1.09889	2.56372		4.3696	0.1556
	-1.5	4.38515	1.03456	2.21271	1.21148	1.92191	1.11539	1.75984	1.84834	1.32431	1.04362	2.65564		4.3799	0.1745
	-1.5	4.39539	1.12494	2.36488	1.25647	1.95353	1.29348	1.84238	2.03914	1.45598	1.09222	2.80159		4.3901	0.1476
	-1.5	4.40563	1.18589	2.44162	1.31469	2.01537	1.32167	1.89503	2.26128	1.5854	1.1177	2.956		4.4003	0.178
	-1.5	4.41587	1.27932	2.57113	1.48547	2.02464	1.23814	1.88344	2.37958	1.68179	1.22145	3.06493		4.4106	0.2045
	-1.5	4.42611	1.38475	2.78528	1.55225	2.11259	1.2623	1.98379	2.56135	1.7379	1.25778	3.33481		4.4208	0.2077
	-1.5	4.43635	1.43605	2.9041	1.6436	2.22554	1.33906	2.13115	2.70586	1.82695	1.26776	3.61927		4.4311	0.2165
	-1.5	4.44659	1.50082	3.1214	1.71408	2.2873	1.36962	2.24459	2.78652	1.92755	1.33287	3.87238		4.4413	0.2628
	-1.5	4.45683	1.52979	3.38946	1.77781	2.34298	1.49907	2.3644	2.97634	1.96989	1.41484	4.11602		4.4515	0.2729
	-1.5	4.46707	1.5429	3.5412	1.79358	2.45618	1.59638	2.42915	3.2505	2.12263	1.58459	4.3288		4.4618	0.2763
	-1.5	4.47731	1.66654	3.86376	1.89404	2.5589	1.66276	2.54566	3.47383	2.37232	1.66735	4.54734		4.472	0.2742
	-1.5	4.48755	1.78852	4.15461	2.12073	2.60593	1.66695	2.71816	3.70871	2.46802	1.81124	4.84058		4.4823	0.2732
	-1.5	4.49779	1.84726	4.47722	2.22356	2.84063	1.69251	2.78258	3.96759	2.57273	1.93727	5.2623		4.4925	0.2664
	-1.5	4.50803	1.93225	4.79303	2.21173	3.00961	1.87343	2.9253	4.27225	2.73062	1.91869	5.51227		4.5027	0.3124
	-1.5	4.51827	2.05781	5.08307	2.39333	3.07901	1.92029	3.04649	4.63599	2.81554	2.06194	5.81301		4.513	0.3573
	-1.5	4.52851	2.21984	5.40483	2.57033	3.25002	1.91114	3.13342	4.92554	3.00925	2.25143	6.1		4.5232	0.3414
	-1.5	4.53875	2.33275	5.62825	2.72254	3.49141	1.92979	3.29995	5.25761	3.24114	2.3501	6.47458		4.5335	0.3419
	-1.5	4.54899	2.39594	5.93966	2.78366	3.71018	1.99204	3.57399	5.4812	3.4064	2.44046	6.77916		4.5437	0.3294
	-1.5	4.55923	2.63133	6.21528	2.918	3.83161	2.10872	3.72886	5.82467	3.55929	2.5022	7.12181		4.5539	0.3357
	-1.5	4.56947	2.67844	6.54228	3.13097	4.11036	2.24763	3.93386	6.20388	3.68238	2.65254	7.47992		4.5642	0.3445
	-1.5	4.57971	2.71012	6.8429	3.39998	4.37895	2.36535	4.14682	6.47748	3.79785	2.76441	7.81307		4.5744	0.3571
	-1.5	4.58995	2.91674	7.26674	3.5079	4.66849	2.49498	4.41388	6.80434	4.08034	2.88269	8.04292		4.5847	0.3749
	-1.5	4.60019	3.1216	7.63157	3.6672	4.98672	2.59681	4.74356	7.1479	4.40858	3.09956	8.32348		4.5949	0.3755
	-1.5	4.61043	3.20409	8.00109	3.92566	5.21988	2.65531	4.9048	7.49664	4.65446	3.20528	8.65943		4.6051	0.3813
	-1.5	4.62067	3.40068	8.29077	4.16615	5.45392	2.7896	5.17853	7.78144	5.02762	3.43949	9.02254		4.6154	0.3781
	-1.5	4.63091	3.65025	8.65325	4.37973	5.73084	3.0137	5.56505	8.11632	5.47333	3.71407	9.47903		4.6256	0.3749
	-1.5	4.64115	3.87902	9.04869	4.69781	6.07713	3.11739	5.79383	8.49286	5.77573	3.80714	10.0185		4.6359	0.3681
	-1.5	4.65139	4.09605	9.45825	5.07106	6.46085	3.3376	6.17836	8.82019	5.97156	3.99382	10.3631		4.6461	0.3653
	-1.5	4.66163	4.43014	9.9257	5.33497	6.75795	3.46872	6.57698	9.09364	6.32257	4.27241	10.5659		4.6563	0.3791
	-1.5	4.67187	4.72877	10.213	5.71084	7.10439	3.63434	6.8464	9.397	6.56567	4.48853	11.0133		4.6666	0.3987
	-1.5	4.68211	5.02435	10.4875	6.007	7.31879	3.83328	7.00045	9.80876	6.83945	4.76521	11.422		4.6768	0.3844
	-1.5	4.69235	5.2744	10.7783	6.24788	7.51766	4.05976	7.30399	10.2016	7.11658	5.04796	11.6904		4.6871	0.3693
	-1.5	4.70259	5.50009	11.2367	6.49111	7.83397	4.20604	7.593	10.5881	7.47448	5.33992	12.0189		4.6973	0.364
	-1.5	4.71283	5.74751	11.5119	6.74889	8.21461	4.42333	7.86189	11.0007	7.84742	5.59544	12.2678		4.7075	0.3253
	-1.5	4.72307	6.01637	11.7501	7.0541	8.54474	4.6721	8.30347	11.2763	8.06624	5.91552	12.6469		4.7178	0.3224
	-1.5	4.73331	6.31156	12.0401	7.35653	8.86303	5.01971	8.62669	11.5188	8.42694	6.21439	12.9157		4.728	0.3106
	-1.5	4.74355	6.62402	12.3717	7.65743	9.16973	5.25981	8.87186	11.9069	8.76662	6.3814	13.154		4.7383	0.3004
	-1.5	4.75379	6.92635	12.6704	8.01228	9.58872	5.56715	9.25992	12.1806	9.11518	6.57227	13.3742		4.7485	0.2859
	-1.5	4.76403	7.1808	12.9613	8.32764	9.86984	5.93755	9.70631	12.2955	9.37656	6.88185	13.681		4.7587	0.2419
	-1.5	4.77427	7.44165	13.1364	8.61639	10.2065	6.07837	10.0142	12.4961	9.61978	7.1518	13.907		4.769	0.2093
	-1.5	4.78451	7.77503	13.2666	8.93885	10.5751	6.31489	10.3713	12.7758	10.0542	7.4688	14.0887		4.7792	0.23
	-1.5	4.79475	8.14481	13.4366	9.23561	10.8427	6.58714	10.7174	13.0539	10.4427	7.88171	14.1608		4.7895	0.2407
	-1.5	4.80499	8.49075	13.6173	9.54132	11.197	6.99845	10.9612	13.234	10.7183	8.13931	14.2921		4.7997	0.252
	-1.5	4.81523	8.7711	13.8107	9.8345	11.5301	7.31739	11.2646	13.4454	11.0755	8.44875	14.4984		4.8099	0.2037
	-1.5	4.82547	9.12245	13.9563	10.2263	11.8794	7.48493	11.5929	13.6272	11.4309	8.78325	14.632		4.8202	0.1847
	-1.5	4.83571	9.37125	14.1335	10.6408	12.1591	7.77517	11.8762	13.79	11.6728	9.07428	14.7099		4.8304	0.1732
	-1.5	4.84595	9.67598	14.3739	10.857	12.3966	8.02927	12.1273	13.8674	11.9988	9.34071	14.8092		4.8407	0.176
	-1.5	4.85619	10.0238	14.4565	11.1371	12.5705	8.35777	12.3695	13.9872	12.3004	9.65528	14.795		4.8509	0.1789
	-1.5	4.86643	10.3015	14.5079	11.4741	12.9426	8.64428	12.6932	14.2165	12.5328	9.91819	14.9162		4.8611	0.1437
	-1.5	4.87667	10.5909	14.5324	11.8199	13.2202	9.03867	12.952	14.2467	12.7658	10.2627	14.9544		4.8714	0.1714
	-1.5	4.88691	10.7806	14.5193	12.0737	13.4247	9.36434	13.2355	14.332	13.0607	10.6016	15.1137		4.8816	0.1623
	-1.5	4.89715	11.0433	14.5183	12.3035	13.5235	9.70696	13.4256	14.3525	13.2028	10.9244	15.0495		4.8919	0.129
	-1.5	4.90739	11.3647	14.522	12.6362	13.648	9.93555	13.6131	14.4417	13.3852	11.2908	15.0403		4.9021	0.0921
	-1.5	4.91763	11.6755	14.5596	12.8565	13.8193	10.2439	13.7515	14.4362	13.6609	11.5829	15.0118		4.9123	0.1032
	-1.5	4.92787	11.8933	14.5677	13.0852	13.94	10.5567	13.9594	14.4319	13.8646	11.8768	14.943		4.9226	0.1198
	-1.5	4.93811	12.1443	14.5215	13.2946	14.1621	10.8516	13.9341	14.4679	14.0455	12.1697	14.9556		4.9328	0.1258
	-1.5	4.94835	12.3664	14.6309	13.4995	14.2138	11.0407	14.0741	14.5304	14.1797	12.4242	14.9491		4.9431	0.131
	-1.5	4.95859	12.5891	14.5842	13.6755	14.323	11.3285	14.2839	14.4712	14.3105	12.6312	14.8772		4.9533	0.1161
	-1.5	4.96883	12.8236	14.5028	13.8762	14.3612	11.6993	14.401	14.4917	14.3627	12.9493	14.752		4.9635	0.1306
	-1.5	4.97907	13.0529	14.4787	13.9822	14.4133	11.9996	14.4929	14.4759	14.474	13.1474	14.6762		4.9738	0.1339
	-1.5	4.98931	13.2691	14.4693	14.1485	14.5012	12.2837	14.6122	14.4769	14.5543	13.38	14.5778		4.984	0.1114
	-1.5	4.99955	13.4234	14.3544	14.2548	14.5656	12.5069	14.6793	14.3927	14.5464	13.5988	14.4985		4.9943	0.0819
	-1.5	5.00979	13.5653	14.2764	14.3879	14.5704	12.8073	14.7172	14.4074	14.6349	13.652	14.3509		5.0045	0.0891
	-1.5	5.02003	13.6754	14.1793	14.4862	14.6301	12.9714	14.7578	14.2838	14.6699	13.8518	14.2593		5.0147	0.0666
	-1.5	5.03027	13.8499	14.0651	14.5152	14.6335	13.217	14.7239	14.0912	14.6765	14.0011	14.2019		5.025	0.086
	-1.5	5.04051	13.9601	14.0968	14.5843	14.692	13.3517	14.8331	14.0367	14.8083	14.1029	14.1237		5.0352	0.0788
	-1.5	5.05075	14.1012	13.9596	14.5156	14.7195	13.4745	14.8321	13.8992	14.7012	14.13	14.0094		5.0455	0.0995
	-1.5	5.06099	14.1371	13.8052	14.6214	14.6268	13.6513	14.9015	13.9362	14.7177	14.2276	13.953		5.0557	0.1116
	-1.5	5.07123	14.1101	13.7495	14.7101	14.5523	13.8251	14.7384	13.8143	14.7321	14.3306	13.833		5.0659	0.1304
	-1.5	5.08147	14.3154	13.6302	14.7283	14.524	13.823	14.774	13.6221	14.6475	14.3533	13.6539		5.0762	0.1011
	-1.5	5.09171	14.2488	13.4938	14.7574	14.571	13.8257	14.7453	13.4636	14.5964	14.2901	13.5636		5.0864	0.1042
	-1.5	5.10195	14.2001	13.245	14.841	14.4482	14.0213	14.5922	13.3094	14.5427	14.281	13.4066		5.0967	0.1119
	-1.5	5.11219	14.277	13.1029	14.7757	14.3544	14.184	14.4542	13.1466	14.4803	14.3406	13.3102		5.1069	0.1101
	-1.5	5.12243	14.2108	12.9558	14.7091	14.286	14.1538	14.4242	13.1135	14.3992	14.3517	13.076		5.1171	0.0782
	-1.5	5.13267	14.1291	12.7103	14.6947	14.2269	14.204	14.2984	13.0588	14.3532	14.322	12.9404		5.1274	0.0818
	-1.5	5.14291	14.1651	12.5185	14.6597	14.1928	14.281	14.0918	12.944	14.2909	14.302	12.7622		5.1376	0.092
	-1.5	5.15315	14.1484	12.4263	14.5661	14.0724	14.3112	13.9307	12.7344	14.1518	14.2998	12.6293		5.1479	0.0838
	-1.5	5.16339	14.074	12.3357	14.4999	13.9651	14.3152	13.8879	12.5086	14.0672	14.2088	12.4971		5.1581	0.0805
	-1.5	5.17363	13.9739	12.1614	14.3366	13.7659	14.28	13.6725	12.3003	13.9978	14.1929	12.4115		5.1683	0.083
	-1.5	5.18387	13.9592	11.9993	14.2563	13.6705	14.2137	13.5657	12.1974	13.8704	14.0387	12.2768		5.1786	0.0645
	-1.5	5.19411	13.8056	11.8557	14.1434	13.5473	14.2047	13.4572	12.1408	13.7007	14.0035	12.2236		5.1888	0.0857
	-1.5	5.20435	14.1348	11.7848	14.0561	13.3666	14.1691	13.2991	11.9679	13.5752	13.9045	12.0191		5.1991	0.0718
	-1.5	5.21459	13.9919	11.6572	13.9577	13.2289	14.156	13.1936	11.7669	13.4216	13.8749	11.8577		5.2093	0.0801
	-1.5	5.22483	13.6314	11.491	13.7244	13.1428	14.1218	13.0499	11.5972	13.3394	13.768	11.6397		5.2195	0.0394
	-1.5	5.23507	13.4499	11.2873	13.615	13.0007	14.0764	12.9799	11.5427	13.1493	13.6792	11.5468		5.2298	0.0131
	-1.5	5.24531	13.2922	11.114	13.5475	12.8108	13.9325	12.8282	11.4629	12.9306	13.4986	11.3639		5.24	0.004
	-1.5	5.25555	13.1358	10.9913	13.4722	12.6631	13.8492	12.7771	11.3795	12.8474	13.492	11.0854		5.2503	-0.0263
	-1.5	5.26579	12.9689	10.8394	13.3633	12.5718	13.8167	12.6082	11.2249	12.7613	13.3273	10.9526		5.2605	0.0119
	-1.5	5.27603	12.8011	10.7466	13.1439	12.3364	13.7788	12.5232	11.146	12.6264	13.2293	10.7661		5.2707	0.0162
	-1.5	5.28627	12.7445	10.6095	12.9688	12.1778	13.6787	12.426	11.0591	12.4807	13.0507	10.6092		5.281	0.0082
	-1.5	5.29651	12.5169	10.5319	12.8202	12.0371	13.5119	12.2938	10.8871	12.2921	13.0462	10.5209		5.2912	0.0039
	-1.5	5.30675	12.3271	10.3815	12.735	12.0137	13.3778	12.1423	10.6201	12.0699	12.8861	10.3815		5.3015	0.0008
	-1.5	5.31699	12.1132	10.3054	12.5307	11.7726	13.2467	12.0994	10.4805	12.0073	12.6566	10.1833		5.3117	-0.0413
	-1.5	5.32723	11.9301	10.15	12.4091	11.5741	13.0858	11.9912	10.4869	11.7804	12.5271	10.1125		5.3219	-0.0101
	-1.5	5.33747	11.8329	9.97604	12.2413	11.3694	12.9292	11.7829	10.2649	11.6405	12.4168	10.0475		5.3322	0.0218
	-1.5	5.34771	11.7341	9.87573	12.1571	11.2061	12.8698	11.6379	10.0855	11.5067	12.2803	9.92386		5.3424	0.039
	-1.5	5.35795	11.5219	9.68337	11.9223	11.1116	12.7362	11.3951	9.80912	11.3936	12.0163	9.82365		5.3527	-0.0133
	-1.5	5.36819	11.3461	9.49967	11.8258	11.0366	12.5181	11.2686	9.79252	11.2383	11.9959	9.66493		5.3629	-0.003
	-1.5	5.37843	11.2996	9.41918	11.7296	10.81	12.3488	11.2031	9.70772	10.9893	11.8573	9.50747		5.3731	-0.0172
	-1.5	5.38867	11.1724	9.38418	11.541	10.6226	12.156	10.9606	9.46757	10.8445	11.7387	9.24959		5.3834	-0.0015
	-1.5	5.39891	10.8988	9.33991	11.4515	10.5881	12.1038	10.8427	9.4394	10.7094	11.616	9.19458		5.3936	0.0254
	-1.5	5.40915	10.7389	9.19837	11.1537	10.4236	12.0199	10.6619	9.28926	10.6233	11.4516	9.15361		5.4039	0.0226
	-1.5	5.41939	10.6652	8.97423	10.9607	10.2731	11.804	10.5609	9.14784	10.461	11.2965	9.0739		5.4141	-0.007
	-1.5	5.42963	10.4927	8.84465	10.8413	10.1559	11.6648	10.4752	8.95578	10.4086	11.1935	8.91379		5.4243	-0.0426
	-1.5	5.43987	10.3208	8.69457	10.7111	10.1617	11.4813	10.3599	8.80418	10.3014	11.0693	8.82978		5.4346	-0.0266
	-1.5	5.45011	10.2272	8.6016	10.5432	9.95116	11.3929	10.2604	8.61962	10.0897	10.97	8.76223		5.4448	-0.0475
	-1.5	5.46035	10.1813	8.50549	10.3539	9.75163	11.298	10.0475	8.58362	10.0057	10.8037	8.60366		5.4551	-0.0638
	-1.5	5.47059	10.0321	8.42505	10.2031	9.62675	11.1126	9.94651	8.46233	9.86304	10.6978	8.40419		5.4653	-0.0796
	-1.5	5.48083	9.81766	8.23386	10.1204	9.57096	10.9533	9.89837	8.39036	9.71386	10.6374	8.28032		5.4755	-0.1186
	-1.5	5.49107	9.72209	8.09201	10.0637	9.4341	10.8655	9.71736	8.26865	9.50315	10.3924	8.16209		5.4858	-0.1289
	-1.5	5.50131	9.5563	7.9786	9.85801	9.35758	10.7038	9.56234	8.14862	9.3997	10.2674	8.03001		5.496	-0.1518
	-1.5	5.51155	9.4403	7.84619	9.66872	9.19535	10.5276	9.4001	7.95869	9.31023	10.1143	7.96448		5.5063	-0.1895
	-1.5	5.52179	9.37916	7.81895	9.54448	9.00301	10.3905	9.33524	7.79338	9.17898	9.94913	7.86018		5.5165	-0.2126
	-1.5	5.53203	9.25276	7.6957	9.28455	8.92957	10.2997	9.19552	7.62835	8.99495	9.83413	7.75896		5.5267	-0.2288
	-1.5	5.54227	9.09827	7.56274	9.16381	8.78762	10.1273	9.06628	7.56247	8.84015	9.8004	7.68008		5.537	-0.2203
	-1.5	5.55251	9.00752	7.44352	9.06986	8.67385	9.92126	8.88272	7.50622	8.71859	9.74483	7.47425		5.5472	-0.2387
	-1.5	5.56275	8.87041	7.34427	8.92627	8.63908	9.80114	8.78029	7.30807	8.67437	9.45675	7.41471		5.5575	-0.2435
	-1.5	5.57299	8.81123	7.25643	8.76144	8.47641	9.73551	8.61575	7.16228	8.50639	9.34066	7.28917		5.5677	-0.251
	-1.5	5.58323	8.6491	7.12986	8.70655	8.43237	9.69503	8.54454	7.09198	8.38522	9.29994	7.1959		5.5779	-0.2589
	-1.5	5.59347	8.48602	7.00612	8.57866	8.36372	9.56565	8.43385	7.00579	8.41675	9.14491	7.16537		5.5882	-0.2944
	-1.5	5.60371	8.39994	6.92498	8.41856	8.19598	9.45533	8.24913	6.8293	8.25704	8.98086	7.05969		5.5984	-0.3068
	-1.5	5.61395	8.29234	6.76511	8.27297	8.04626	9.31543	8.17045	6.71528	8.08657	8.91084	6.95988		5.6087	-0.2858
	-1.5	5.62419	8.21794	6.70811	8.10478	7.96077	9.14103	8.02066	6.68968	8.05486	8.76441	6.90632		5.6189	-0.3139
	-1.5	5.63443	8.03201	6.63027	8.05802	7.9048	9.13911	7.92293	6.59242	8.00707	8.5959	6.71352		5.6291	-0.3448
	-1.5	5.64467	7.89053	6.40726	7.96375	7.88006	8.92417	7.82612	6.45664	7.90392	8.50655	6.69154		5.6394	-0.3461
	-1.5	5.65491	7.789	6.3018	7.83569	7.79175	8.71706	7.6877	6.45662	7.7543	8.31515	6.57571		5.6496	-0.3841
	-1.5	5.66515	7.69993	6.25242	7.66571	7.56128	8.55688	7.57083	6.34504	7.57491	8.15341	6.43115		5.6599	-0.4041
	-1.5	5.67539	7.58482	6.02911	7.51823	7.3587	8.51934	7.51439	6.19191	7.46779	8.18574	6.30019		5.6701	-0.4172
	-1.5	5.68563	7.57398	5.84953	7.54217	7.3364	8.44733	7.43216	6.13572	7.3384	8.10173	6.2378		5.6803	-0.4217
	-1.5	5.69587	7.37072	5.89551	7.46639	7.26443	8.36107	7.26164	6.09442	7.31465	7.86958	6.14803		5.6906	-0.3959
	-1.5	5.70611	7.3218	5.79602	7.30117	7.11882	8.22677	7.13122	5.99541	7.19983	7.67618	5.99036		5.7008	-0.4026
	-1.5	5.71635	7.12924	5.71949	7.145	6.99541	8.13935	7.02545	5.9101	7.10931	7.60978	5.89376		5.7111	-0.449
	-1.5	5.72659	6.98891	5.66703	7.02761	6.82674	7.95574	7.04849	5.82949	7.02871	7.48626	5.86551		5.7213	-0.4582
	-1.5	5.73683	6.9013	5.47467	6.88399	6.73114	7.84984	6.85269	5.68084	6.85541	7.39202	5.82878		5.7315	-0.4753
	-1.5	5.74707	6.85179	5.46399	6.77748	6.65715	7.68092	6.80299	5.67189	6.7424	7.2488	5.73171		5.7418	-0.4794
	-1.5	5.75731	6.63211	5.52349	6.66157	6.5808	7.53115	6.73968	5.6632	6.68225	7.10304	5.62122		5.752	-0.4968
	-1.5	5.76755	6.52428	5.41462	6.57312	6.45086	7.42409	6.44833	5.47786	6.55989	7.13151	5.43477		5.7623	-0.5327
	-1.5	5.77779	6.46605	5.36317	6.50464	6.30388	7.3722	6.33685	5.35127	6.3288	7.03981	5.30482		5.7725	-0.5256
	-1.5	5.78803	6.40796	5.23941	6.37139	6.30539	7.17348	6.28385	5.23281	6.25137	6.87912	5.29321		5.7827	-0.5452
	-1.5	5.79827	6.29953	5.06559	6.28708	6.21792	7.10182	6.28794	5.13779	6.12144	6.71809	5.24956		5.793	-0.5373
	-1.5	5.80851	6.14359	5.0054	6.20403	6.00052	7.00908	6.26109	5.07639	5.97808	6.6467	5.11221		5.8032	-0.5682
	-1.5	5.81875	6.11589	4.92027	6.09627	5.8428	6.87685	6.1929	4.9616	5.96681	6.55106	5.0233		5.8135	-0.5871
	-1.5	5.82899	6.01561	4.80004	5.90126	5.82018	6.78772	6.05091	4.87204	5.98204	6.46891	5.04185		5.8237	-0.5952
	-1.5	5.83923	5.8218	4.6894	5.80854	5.77444	6.6415	5.96807	4.78746	5.87273	6.332	4.91269		5.8339	-0.5852
	-1.5	5.84947	5.77763	4.58427	5.68493	5.6872	6.66614	5.88894	4.65318	5.74485	6.34398	4.73974		5.8442	-0.6178
	-1.5	5.85971	5.71121	4.53289	5.65933	5.55365	6.63173	5.75617	4.60884	5.72271	6.19194	4.62478		5.8544	-0.6311
	-1.5	5.86995	5.67529	4.46406	5.65796	5.49964	6.49017	5.64287	4.5865	5.59769	6.09827	4.62376		5.8647	-0.6745
	-1.5	5.88019	5.5716	4.40933	5.48075	5.41198	6.47299	5.53268	4.40008	5.43787	6.03698	4.56228		5.8749	-0.6914
	-1.5	5.89043	5.37415	4.29491	5.3736	5.29433	6.29385	5.43504	4.29259	5.3657	5.93153	4.55137		5.8851	-0.692
	-1.5	5.90067	5.25156	4.14891	5.26855	5.27165	6.12128	5.33679	4.27258	5.35406	5.83775	4.39939		5.8954	-0.7138
	-1.5	5.91091	5.18771	4.06104	5.16572	5.14275	6.08162	5.2563	4.05336	5.3127	5.73821	4.30063		5.9056	-0.7501
	-1.5	5.92115	5.00903	3.93277	4.97766	4.98934	6.01475	5.16668	4.03436	5.2146	5.5424	4.16778		5.9159	-0.752
	-1.5	5.93139	4.96041	3.93052	4.97999	4.98433	5.85943	5.03909	3.9457	5.11023	5.4724	4.09974		5.9261	-0.7341
	-1.5	5.94163	4.93487	3.79467	4.89122	4.9994	5.7803	4.95853	3.91989	5.08677	5.36833	4.06738		5.9363	-0.7674
	-1.5	5.95187	4.83606	3.72756	4.77943	4.8511	5.7071	4.88634	3.89617	5.04034	5.24168	4.02847		5.9466	-0.7755
	-1.5	5.96211	4.66658	3.71325	4.67863	4.78045	5.65456	4.78315	3.84448	4.85155	5.24147	3.99492		5.9568	-0.7675
	-1.5	5.97235	4.56299	3.67236	4.61432	4.62965	5.55812	4.62856	3.6393	4.76016	5.18351	3.8929		5.9671	-0.778
	-1.5	5.98259	4.52024	3.58741	4.56731	4.63379	5.49632	4.60248	3.60631	4.65508	5.13782	3.78658		5.9773	-0.7937
	-1.5	5.99283	4.52472	3.54702	4.52428	4.55481	5.34501	4.48315	3.69372	4.72134	5.00316	3.74038		5.9875	-0.8094
	-1.5	6.00307	4.39376	3.45749	4.35003	4.46801	5.23295	4.36171	3.50832	4.5272	4.90078	3.72156		5.9978	-0.8257
	-1.5	6.01331	4.28227	3.40471	4.25133	4.4221	5.18425	4.31142	3.39395	4.41318	4.83832	3.63263		6.008	-0.8432
	-1.5	6.02355	4.29809	3.43573	4.19137	4.33429	5.02883	4.3162	3.3833	4.38728	4.73807	3.64631		6.0183	-0.8437
	-1.5	6.03379	4.1283	3.35459	4.12029	4.22733	5.01838	4.29078	3.38952	4.36174	4.72007	3.56276		6.0285	-0.854
	-1.5	6.04403	3.99806	3.34092	4.09764	4.13855	5.02723	4.19021	3.29095	4.27807	4.63337	3.46939		6.0387	-0.86
	-1.5	6.05427	3.99326	3.26258	4.01381	4.12358	4.92057	4.08894	3.08012	4.24129	4.62784	3.39225		6.049	-0.8616
	-1.5	6.06451	3.91555	3.12633	3.90959	3.97424	4.76881	4.02487	3.15137	4.16917	4.48796	3.32697		6.0592	-0.8754
	-1.5	6.07475	3.88848	2.97921	3.83948	4.02849	4.70531	3.86543	3.11268	4.07335	4.43727	3.30421		6.0695	-0.8901
	-1.5	6.08499	3.75034	2.86524	3.75027	3.94867	4.6844	3.80793	3.01004	4.01122	4.30253	3.25969		6.0797	-0.9014
	-1.5	6.09523	3.70695	2.94473	3.71384	3.91927	4.53386	3.87419	2.88325	4.03017	4.17803	3.15286		6.0899	-0.9217
	-1.5	6.10547	3.68206	2.94042	3.69493	3.83287	4.41694	3.74415	2.87476	3.97735	4.16021	3.09373		6.1002	-0.9277
	-1.5	6.11571	3.58891	2.43513	3.63221	3.63017	4.33295	3.6381	2.81278	3.8626	4.08716	2.99938		6.1104	-0.9138
	-1.5	6.12595	3.44419	2.39782	3.56968	3.62126	4.2902	3.56656	2.6572	3.88445	3.99511	2.92316		6.1207	-0.919
	-1.5	6.13619	3.35471	2.49886	3.59208	3.577	4.26945	3.53749	2.64989	3.74591	4.02906	2.97319		6.1309	-0.9627
	-1.5	6.14643	3.33265	2.52276	3.42192	3.48693	4.23147	3.51406	2.58178	3.62654	3.94774	2.8705		6.1411	-0.9522
	-1.5	6.15667	3.307	2.54123	3.33478	3.36449	4.17142	3.41243	2.55727	3.65914	3.83827	2.88485		6.1514	-0.9604
	-1.5	6.16691	3.20969	2.58177	3.35364	3.28387	4.03859	3.27246	2.57763	3.59636	3.77447	2.83792		6.1616	-0.974
	-1.5	6.17715	3.14204	2.52226	3.20898	3.23796	3.98683	3.20129	2.49656	3.5029	3.73442	2.78061		6.1719	-1.0031
	-1.5	6.18739	3.11316	2.44931	3.09154	3.2534	3.94154	3.09021	2.42129	3.38496	3.67654	2.73662		6.1821	-0.9821
	-1.5	6.19763	2.97672	2.28959	3.03899	3.10539	3.86507	3.03025	2.35569	3.3655	3.55849	2.68615		6.1923	-1.0214
	-1.5	6.20787	2.90043	2.2382	3.03999	3.1207	3.81559	3.00564	2.37179	3.2937	3.55143	2.6124		6.2026	-1.0429
	-1.5	6.21811	2.87537	2.22799	2.96347	3.03998	3.79119	3.0623	2.20346	3.23491	3.47946	2.5344		6.2128	-1.0464
	-1.5	6.22835	2.76146	2.11765	2.8525	2.97576	3.68321	2.98185	2.24583	3.10362	3.35023	2.525		6.2231	-1.074
	-1.5	6.23859	2.65535	2.02327	2.84824	2.93347	3.59085	2.86549	2.13414	2.95473	3.36457	2.49594		6.2333	-1.0637
	-1.5	6.24883	2.61966	1.97217	2.82366	2.80726	3.44632	2.81713	2.00779	2.86302	3.2154	2.40278		6.2435	-1.0644
	-1.5	6.25907	2.60283	1.96776	2.69844	2.66321	3.48735	2.6608	2.00068	2.81879	3.13215	2.39462		6.2538	-1.0643
	-1.5	6.26931	2.54599	1.89526	2.69367	2.63887	3.42949	2.58134	1.94527	2.8253	2.99776	2.35662		6.264	-1.0857
	-1.5	6.27955	2.49147	1.86572	2.61651	2.63711	3.24247	2.63358	1.88128	2.8179	2.99844	2.33389		6.2743	-1.0956
	-1.5	6.28979	2.45557	1.82423	2.57668	2.55074	3.20749	2.56621	1.99148	2.81135	2.93439	2.2401		6.2845	-1.0967
	-1.5	6.30003	2.45558	1.70895	2.49734	2.44151	3.16201	2.50085	1.8764	2.72357	2.86086	2.14296		6.2947	-1.1057
	-1.5	6.31027	2.41765	1.56165	2.4528	2.41958	3.06849	2.44607	1.79029	2.64365	2.83732	2.11586		6.305	-1.1213
	-1.5	6.32051	2.28526	1.56581	2.40564	2.34013	3.08872	2.41055	1.77895	2.62116	2.75391	2.08125		6.3152	-1.132
	-1.5	6.33075	2.19444	1.59812	2.31594	2.3974	3.05092	2.41623	1.75503	2.47108	2.69209	2.02272		6.3255	-1.1474
	-1.5	6.34099	2.03492	1.52962	2.30035	2.32167	2.94829	2.39864	1.69884	2.39201	2.61162	1.9968		6.3357	-1.1453
	-1.5	6.35123	1.96723	1.45907	2.2263	2.35424	2.75163	2.21226	1.55801	2.37474	2.56215	1.90809		6.3459	-1.1712
	-1.5	6.36147	2.0245	1.43573	2.1468	2.19578	2.67603	2.15287	1.54094	2.41708	2.55422	1.84044		6.3562	-1.1382
	-1.5	6.37171	1.95613	1.33366	2.11481	2.03234	2.67207	2.16948	1.47409	2.32438	2.3515	1.84201		6.3664	-1.1655
	-1.5	6.38195	1.83157	1.30634	2.02057	2.05072	2.69976	2.0732	1.48402	2.2463	2.29919	1.91222		6.3767	-1.1731
	-1.5	6.39219	1.7431	1.24304	1.99213	2.03111	2.64729	2.06485	1.51417	2.20613	2.30465	1.94262		6.3869	-1.1686
	-1.5	6.40243	1.64647	1.24991	2.03214	1.87067	2.53241	2.00235	1.4501	2.16156	2.27692	1.83055		6.3971	-1.1816
	-1.5	6.41267	1.6078	1.24758	1.90348	1.82587	2.50528	1.93762	1.38554	2.14439	2.23769	1.65387		6.4074	-1.1955
	-1.5	6.42291	1.60409	1.17511	1.87383	1.8814	2.42865	1.93547	1.30281	2.11543	2.17607	1.72621		6.4176	-1.1844
	-1.5	6.43315	1.59597	1.25334	1.85468	1.79409	2.43667	1.84191	1.22049	2.05256	2.13364	1.66546		6.4279	-1.1881
	-1.5	6.44339	1.56326	1.13818	1.68919	1.87772	2.35598	1.81275	1.16944	2.03548	2.04231	1.66056		6.4381	-1.2246
	-1.5	6.45363	1.49676	1.03872	1.60565	1.82939	2.32063	1.84557	1.17767	1.97378	1.98618	1.57212		6.4483	-1.2401
	-1.5	6.46387	1.39061	0.895279	1.57235	1.61818	2.26194	1.78113	1.13237	1.91482	2.02032	1.56082		6.4586	-1.2737
	-1.5	6.47411	1.36208	0.915268	1.54011	1.57008	2.23162	1.74479	1.15485	1.91149	1.90176	1.45208		6.4688	-1.2761
	-1.5	6.48435	1.27581	0.915028	1.57928	1.57829	2.13182	1.75614	1.11825	1.94461	1.81372	1.37835		6.4791	-1.2958
	-1.5	6.49459	1.28131	0.948097	1.39931	1.64519	2.12254	1.56221	1.04956	1.82559	1.81326	1.36114		6.4893	-1.302
	-1.5	6.50483	1.22189	0.870533	1.45945	1.62772	2.07618	1.46789	0.989525	1.6986	1.78254	1.32856		6.4995	-1.2961
	-1.5	6.51507	1.20663	0.724522	1.42852	1.51511	2.08642	1.39933	0.858692	1.74612	1.64826	1.2363		6.5098	-1.2905
	-1.5	6.52531	1.09889	0.747135	1.38966	1.44833	2.01627	1.38929	0.841217	1.70764	1.65445	1.24861		6.52	-1.3176
	-1.5	6.53555	1.12649	0.687244	1.30216	1.53903	2.02673	1.35645	0.786678	1.64772	1.56382	1.28511		6.5303	-1.3393
	-1.5	6.54579	1.08415	0.621586	1.32794	1.377	1.92594	1.39229	0.76403	1.61718	1.54917	1.10699		6.5405	-1.3326
	-1.5	6.55603	1.06269	0.548389	1.29687	1.43218	1.88942	1.40633	0.752586	1.54549	1.58402	1.15915		6.5507	-1.3077
	-1.5	6.56627	0.996399	0.607437	1.20877	1.34586	1.84246	1.30677	0.786751	1.5195	1.47055	1.21907		6.561	-1.3102
	-1.5	6.57651	0.924801	0.625946	1.14523	1.23602	1.79382	1.17251	0.683205	1.37587	1.46078	1.21182		6.5712	-1.3458
	-1.5	6.58675	0.811924	0.491302	1.12734	1.20644	1.68317	1.20887	0.663071	1.4821	1.48244	1.1092		6.5815	-1.388
	-1.5	6.59699	0.789261	0.432758	1.14248	1.14013	1.64292	1.21954	0.628059	1.55247	1.31075	1.04495		6.5917	-1.3719
	-1.5	6.60723	0.706146	0.362305	1.06425	1.16418	1.69024	1.10595	0.609104	1.36361	1.29852	1.0118		6.6019	-1.402
	-1.5	6.61747	0.678226	0.290745	0.991726	1.09554	1.66696	1.09082	0.478821	1.33149	1.35741	0.922047		6.6122	-1.4209
	-1.5	6.62771	0.635338	0.281479	0.998035	1.13938	1.61893	0.967316	0.490646	1.27227	1.35222	0.896107		6.6224	-1.4162
	-1.5	6.63795	0.555702	0.187702	0.904797	1.06438	1.56549	0.972099	0.3181	1.13258	1.34542	0.760532		6.6327	-1.4113
	-1.5	6.64819	0.497162	0.177197	0.818005	1.01822	1.53437	1.00084	0.391224	1.06487	1.27904	0.848843		6.6429	-1.4131
	-1.5	6.65843	0.554314	0.232006	0.865284	0.954735	1.44289	0.951714	0.402214	1.13807	1.16927	0.887253		6.6531	-1.4425
	-1.5	6.66867	0.433205	0.264839	0.816891	0.97406	1.36433	0.871437	0.326588	1.11598	1.14649	0.860462		6.6634	-1.4486
	-1.5	6.67891	0.377239	0.15464	0.771225	0.987232	1.35694	0.854725	0.305382	1.14485	1.03283	0.751759		6.6736	-1.4447
	-1.5	6.68915	0.362442	0.139778	0.80582	0.978172	1.29161	0.847214	0.252537	1.05603	0.996735	0.704609		6.6839	-1.4679
	-1.5	6.69939	0.341785	0.1637	0.84016	0.891022	1.26719	0.717121	0.24826	0.981468	0.933197	0.845577		6.6941	-1.4598
	-1.5	6.70963	0.336849	0.0499535	0.709454	0.854481	1.24406	0.676182	0.227016	0.960701	0.856133	0.823547		6.7043	-1.4389
	-1.5	6.71987	0.282787	0.0414543	0.502178	0.82357	1.3277	0.652676	0.293083	0.935406	0.859612	0.671196		6.7146	-1.4757
	-1.5	6.73011	0.220749	0.0300102	0.454662	0.7813	1.2548	0.637333	0.226395	0.792019	0.815483	0.645447		6.7248	-1.4393
	-1.5	6.74035	0.243938	-0.0549507	0.485863	0.754215	1.16277	0.573139	0.145821	0.892696	0.882404	0.622139		6.7351	-1.4763
	-1.5	6.75059	0.231934	-0.150845	0.440491	0.749138	1.14325	0.530247	0.024559	0.852161	0.789719	0.601826		6.7453	-1.4668
	-1.5	6.76083	0.266598	-0.0673828	0.482464	0.69326	1.13788	0.477306	0.0700264	0.858696	0.716808	0.511005		6.7555	-1.4611
	-1.5	6.77107	0.289215	0.00109863	0.336933	0.671032	1.07954	0.472095	0.0546265	0.887188	0.650017	0.589359		6.7658	-1.472
	-1.5	6.78131	0.2715	-0.0939331	0.432205	0.694286	0.930363	0.430077	-0.0144463	0.834377	0.717621	0.49522		6.776	-1.4722
	-1.5	6.79155	0.16898	-0.167461	0.363323	0.673714	0.923321	0.381966	-0.0805435	0.712006	0.725201	0.519764		6.7863	-1.5083
	-1.5	6.80179	0.141094	-0.257488	0.283924	0.61932	0.883266	0.380653	-0.0972595	0.66523	0.612873	0.47282		6.7965	-1.4679
	-1.5	6.81203	0.128281	-0.258442	0.300884	0.529602	0.838619	0.33279	-0.137947	0.631935	0.572937	0.459553		6.8068	-1.4752
	-1.5	6.82227	0.119278	-0.319836	0.287533	0.541817	0.813671	0.308613	-0.179718	0.702602	0.580269	0.462105		6.817	-1.4691
	-1.5	6.83251	0.0793686	-0.289543	0.230644	0.484039	0.870415	0.248077	-0.159882	0.556168	0.569252	0.404083		6.8272	-1.4881
	-1.5	6.84275	-0.0239029	-0.315304	0.077095	0.472488	0.831657	0.195332	-0.191399	0.584381	0.551647	0.404694		6.8375	-1.4923
	-1.5	6.85299	-0.0911484	-0.351761	0.0909309	0.409153	0.791939	0.181751	-0.178413	0.499088	0.439709	0.528347		6.8477	-1.5052
	-1.5	6.86323	-0.135193	-0.362633	0.0942345	0.355034	0.730736	0.206394	-0.193356	0.495449	0.37809	0.448063		6.858	-1.5119
	-1.5	6.87347	-0.052002	-0.382954	-0.00642395	0.338223	0.748299	0.218922	-0.290783	0.579708	0.407104	0.400089		6.8682	-1.501
	-1.5	6.88371	-0.108849	-0.442677	-0.0521774	0.312435	0.692818	0.150604	-0.270638	0.499073	0.453094	0.457718		6.8784	-1.489
	-1.5	6.89395	-0.217155	-0.397129	-0.169277	0.268749	0.561077	0.0806847	-0.268433	0.360958	0.376553	0.466492		6.8887	-1.4959
	-1.5	6.90419	-0.248158	-0.491604	-0.12487	0.261055	0.505669	0.0463676	-0.267624	0.277775	0.312096	0.295616		6.8989	-1.511
	-1.5	6.91443	-0.309479	-0.562523	-0.014698	0.24884	0.444077	-0.00357437	-0.282627	0.274235	0.297573	0.229218		6.9092	-1.5016
	-1.5	6.92467	-0.382626	-0.533398	0.28857	0.266254	0.445755	-0.0388603	-0.366241	0.25584	0.267937	0.230053		6.9194	-1.4986
	-1.5	6.93491	-0.346195	-0.52293	0.152252	0.211411	0.408482	-0.109726	-0.336834	0.245422	0.234848	0.0720749		6.9296	-1.5101
	-1.5	6.94515	-0.299694	-0.474236	-0.109077	0.0390396	0.352524	-0.17342	-0.366528	0.221985	0.24585	0.185856		6.9399	-1.5267
	-1.5	6.95539	-0.334419	-0.569603	-0.182686	0.0181961	0.403282	-0.135071	-0.50523	0.256557	0.215191	0.220097		6.9501	-1.5518
	-1.5	6.96563	-0.408352	-0.686794	-0.238087	0.0831146	0.364597	-0.133965	-0.381683	0.21376	0.174301	0.107693		6.9604	-1.5512
	-1.5	6.97587	-0.517967	-0.744839	-0.162113	0.167587	0.368759	-0.129719	-0.403721	0.139076	0.107498	0.21883		6.9706	-1.5499
	-1.5	6.98611	-0.492287	-0.672291	-0.105095	0.162926	0.334618	-0.1754	-0.388821	0.16473	0.115486	0.257504		6.9808	-1.5625
	-1.5	6.99635	-0.423515	-0.698669	-0.307491	0.21875	0.29604	-0.172977	-0.382599	0.160965	0.140575	0.19537		6.9911	-1.543
	-1.5	7.00659	-0.450886	-0.737389	-0.391064	0.027504	0.259087	-0.188847	-0.460274	0.110516	0.140686	0.115349		7.0013	-1.5469
	-1.5	7.01683	-0.571857	-0.720165	-0.301418	-0.0807877	0.243542	-0.236206	-0.526985	0.0814133	0.0668945	0.148926		7.0116	-1.5578
	-1.5	7.02707	-0.616253	-0.701019	-0.335991	-0.0218849	0.258144	-0.263004	-0.584396	0.128422	0.0567627	0.0951881		7.0218	-1.5518
	-1.5	7.03731	-0.539051	-0.779102	-0.309086	-0.0849838	0.0964928	-0.434872	-0.508839	0.0448074	-0.0255394	0.0951881		7.032	-1.568
	-1.5	7.04755	-0.571278	-0.840923	-0.309097	-0.154541	0.0889359	-0.404316	-0.535938	0.083931	-0.195213	0.104866		7.0423	-1.5684
	-1.5	7.05779	-0.578667	-0.867443	-0.287151	-0.169884	0.0563354	-0.381355	-0.622055	0.0784492	-0.254921	0.0740547		7.0525	-1.553
	-1.5	7.06803	-0.607349	-0.823719	-0.339207	-0.220047	0.0454979	-0.400238	-0.600525	0.130638	-0.244003	0.0904083		7.0628	-1.5694
	-1.5	7.07827	-0.656368	-0.826237	-0.435173	-0.250496	0.0502319	-0.460575	-0.614578	0.0414696	-0.15361	0.0505791		7.073	-1.564
	-1.5	7.08851	-0.716854	-0.831814	-0.48592	-0.24165	0.00322342	-0.387005	-0.623329	0.0269966	-0.217411	0.104069		7.0832	-1.5764
	-1.5	7.09875	-0.720623	-0.813084	-0.407555	-0.272572	-0.143673	-0.411037	-0.621899	-0.00239944	-0.198433	0.0545044		7.0935	-1.5607
	-1.5	7.10899	-0.636795	-0.755474	-0.366329	-0.26078	-0.151318	-0.454922	-0.570232	-0.0227623	-0.325199	0.0109901		7.1037	-1.5328
	-1.5	7.11924	-0.822285	-0.797543	-0.406242	-0.271164	-0.095932	-0.493282	-0.572544	-0.000614166	-0.32206	0.012352		7.114	-1.5518
	-1.5	7.12948	-0.813446	-0.786446	-0.368023	-0.283428	-0.121754	-0.612026	-0.564407	-0.0641747	-0.313614	0.0371208		7.1242	-1.5341
	-1.5	7.13971	-0.7952	-0.819416	-0.488472	-0.283478	-0.0765266	-0.575764	-0.643562	-0.116936	-0.411316	0.0237961		7.1344	-1.5426
	-1.5	7.14995	-0.839806	-0.931248	-0.556072	-0.409027	-0.146465	-0.55389	-0.64407	-0.134449	-0.404293	0.0394821		7.1447	-1.5449
	-1.5	7.16019	-0.826767	-0.952168	-0.469616	-0.371658	-0.147003	-0.635738	-0.705883	-0.154621	-0.453026	0.0602608		7.1549	-1.5509
	-1.5	7.17043	-0.866608	-0.762676	-0.481926	-0.249706	-0.239174	-0.56308	-0.681065	-0.205357	-0.446777	0.0165558		7.1652	-1.5337
	-1.5	7.18068	-0.926601	-0.829296	-0.544464	-0.301453	-0.18895	-0.579174	-0.61198	-0.170582	-0.394222	-0.00399399		7.1754	-1.5087
	-1.5	7.19092	-0.993038	-0.974064	-0.561703	-0.38327	-0.264256	-0.558025	-0.698502	-0.253494	-0.456234	0.0806084		7.1856	-1.5271
	-1.5	7.20116	-0.973473	-1.0948	-0.524555	-0.346004	-0.240376	-0.597401	-0.700043	-0.240486	-0.531178	0.00222778		7.1959	-1.5371
	-1.5	7.2114	-0.907185	-0.959759	-0.663685	-0.400185	-0.340179	-0.64352	-0.693565	-0.273949	-0.557526	-0.050808		7.2061	-1.529
	-1.5	7.22164	-0.909855	-0.883816	-0.704002	-0.47699	-0.39658	-0.677464	-0.65126	-0.224056	-0.573704	-0.000499725		7.2164	-1.5354
	-1.5	7.23187	-1.02158	-0.949581	-0.636745	-0.409401	-0.260021	-0.740955	-0.585896	-0.27383	-0.596401	-0.122189		7.2266	-1.5473
	-1.5	7.24212	-1.00404	-1.11	-0.622726	-0.502884	-0.328899	-0.701447	-0.629448	-0.222809	-0.555893	-0.119446		7.2368	-1.538
	-1.5	7.25236	-1.0624	-1.09084	-0.603771	-0.549789	-0.431103	-0.657936	-0.725933	-0.302845	-0.628372	-0.0519524		7.2471	-1.5429
	-1.5	7.2626	-1.1096	-0.942165	-0.572777	-0.515186	-0.459793	-0.679489	-0.598141	-0.301785	-0.68074	-0.011364		7.2573	-1.5715
	-1.5	7.27284	-1.09214	-0.958775	-0.592411	-0.515793	-0.457066	-0.670536	-0.571415	-0.197117	-0.692253	-0.0594826		7.2676	-1.5735
	-1.5	7.28308	-1.06445	-1.05586	-0.747025	-0.60936	-0.455025	-0.69508	-0.654457	-0.17186	-0.680763	-0.0919075		7.2778	-1.5654
	-1.5	7.29332	-0.840317	-1.01659	-0.728443	-0.56852	-0.473263	-0.706596	-0.680325	-0.233143	-0.650482	-0.0371132		7.288	-1.5613
	-1.5	7.30356	-0.912392	-1.08406	-0.675831	-0.568352	-0.630215	-0.768539	-0.746246	-0.336296	-0.703938	-0.00107193		7.2983	-1.5552
	-1.5	7.3138	-1.00663	-1.10326	-0.793266	-0.553558	-0.587063	-0.661774	-0.739784	-0.331131	-0.834892	0.093853		7.3085	-1.5476
	-1.5	7.32404	-0.975468	-1.06166	-0.888786	-0.449203	-0.628418	-0.700397	-0.671669	-0.353821	-0.710674	0.012352		7.3188	-1.5545
	-1.5	7.33428	-0.998604	-1.13872	-0.846779	-0.487946	-0.598949	-0.765232	-0.634106	-0.384777	-0.656792	-0.0580788		7.329	-1.5454
	-1.5	7.34452	-1.10257	-1.22869	-0.872383	-0.614178	-0.606327	-0.801991	-0.736877	-0.313702	-0.765057	-0.0130806		7.3392	-1.5261
	-1.5	7.35476	-1.10012	-1.1409	-0.879749	-0.707432	-0.596218	-0.732872	-0.667976	-0.341145	-0.664898	-0.0573158		7.3495	-1.5299
	-1.5	7.365	-1.12623	-1.08131	-0.804363	-0.665161	-0.582386	-0.748535	-0.624592	-0.392406	-0.786407	0.0293274		7.3597	-1.5321
	-1.5	7.37524	-1.1288	-1.0477	-0.808464	-0.618397	-0.566357	-0.80249	-0.662277	-0.318417	-0.907284	0.0707512		7.37	-1.5416
	-1.5	7.38548	-1.0844	-1.0145	-0.935246	-0.551079	-0.618961	-0.836285	-0.611374	-0.371212	-0.877136	-0.0203819		7.3802	-1.544
	-1.5	7.39572	-1.10382	-1.09031	-0.882866	-0.497051	-0.661724	-0.8246	-0.764877	-0.286991	-0.802658	-0.138081		7.3904	-1.5686
	-1.5	7.40596	-1.16017	-1.09106	-0.863754	-0.524876	-0.544876	-0.80695	-0.780628	-0.30307	-0.80505	-0.208366		7.4007	-1.5317
	-1.5	7.4162	-1.15787	-1.10788	-0.897839	-0.601456	-0.580875	-0.788853	-0.780151	-0.292595	-0.833317	-0.178684		7.4109	-1.5172
	-1.5	7.42644	-1.1036	-1.14244	-0.840698	-0.618168	-0.630135	-0.768421	-0.657295	-0.413887	-0.917885	-0.132534		7.4212	-1.5096
	-1.5	7.43668	-1.16918	-1.1292	-0.669025	-0.616489	-0.672604	-0.764591	-0.581154	-0.420578	-0.941689	-0.147129		7.4314	-1.5232
	-1.5	7.44692	-1.14117	-1.11768	-0.815258	-0.635372	-0.632015	-0.870365	-0.619839	-0.387463	-1.00023	-0.110664		7.4416	-1.5088
	-1.5	7.45716	-1.21675	-1.12478	-0.835445	-0.67514	-0.644867	-0.803165	-0.705788	-0.37302	-0.921158	-0.152889		7.4519	-1.4977
	-1.5	7.4674	-1.24472	-1.11956	-0.799023	-0.684162	-0.650146	-0.776596	-0.724171	-0.440197	-0.925926	-0.112522		7.4621	-1.4851
	-1.5	7.47764	-1.24894	-1.22133	-0.864563	-0.693119	-0.700451	-0.862213	-0.716255	-0.403397	-0.887779	-0.0597229		7.4724	-1.5082
	-1.5	7.48788	-1.19897	-1.14221	-0.843456	-0.630508	-0.640087	-0.872715	-0.643753	-0.433437	-0.864574	-0.150242		7.4826	-1.5136
	-1.5	7.49812	-1.27724	-1.18663	-0.878178	-0.635468	-0.727753	-0.783321	-0.589394	-0.325974	-0.900154	-0.106976		7.4928	-1.4912
	-1.5	7.50836	-1.24953	-1.22468	-0.985012	-0.67012	-0.811714	-0.849243	-0.651501	-0.383312	-0.917511	-0.0145187		7.5031	-1.4794
	-1.5	7.5186	-1.27631	-1.16771	-0.954758	-0.688614	-0.753811	-0.859425	-0.652046	-0.393597	-0.96796	-0.0442734		7.5133	-1.474
	-1.5	7.52884	-1.33124	-1.22984	-1.01541	-0.764931	-0.798038	-0.851437	-0.672886	-0.382175	-0.917252	-0.09515		7.5236	-1.466
	-1.5	7.53908	-1.34746	-1.20438	-0.920666	-0.733589	-0.841705	-0.776917	-0.625618	-0.376717	-0.925308	-0.0833626		7.5338	-1.4568
	-1.5	7.54932	-1.32396	-1.24143	-0.844299	-0.601517	-0.886314	-0.826786	-0.592514	-0.391991	-0.933071	-0.114071		7.544	-1.4436
	-1.5	7.55956	-1.26349	-1.1053	-0.854755	-0.650036	-0.886921	-0.884682	-0.668533	-0.389534	-1.04149	-0.168217		7.5543	-1.438
	-1.5	7.5698	-1.27151	-1.09179	-0.95216	-0.69091	-0.811245	-0.796291	-0.605389	-0.444443	-1.0299	-0.165653		7.5645	-1.446
	-1.5	7.58004	-1.24717	-1.09753	-1.0314	-0.792801	-0.859062	-0.758286	-0.617867	-0.405437	-0.987953	-0.16526		7.5748	-1.4033
	-1.5	7.59028	-1.31553	-1.05946	-0.971176	-0.776684	-0.932877	-0.703316	-0.59745	-0.416988	-1.00818	-0.0863762		7.585	-1.3895
	-1.5	7.60052	-1.30928	-1.07007	-0.958969	-0.72126	-0.922302	-0.789375	-0.535629	-0.408298	-1.06191	-0.117825		7.5952	-1.41
	-1.5	7.61076	-1.27068	-1.12601	-0.980568	-0.588737	-0.903275	-0.794643	-0.60001	-0.247208	-1.12013	-0.10445		7.6055	-1.4407
	-1.5	7.621	-1.31293	-1.03293	-0.972401	-0.612709	-0.887589	-0.697021	-0.555225	-0.294003	-1.16523	-0.0955811		7.6157	-1.4326
	-1.5	7.63124	-1.35513	-1.06161	-0.920486	-0.681507	-0.917236	-0.715904	-0.534733	-0.310856	-1.11477	-0.171391		7.626	-1.4252
	-1.5	7.64148	-1.36452	-1.03736	-0.878536	-0.66222	-0.885918	-0.759869	-0.61887	-0.344006	-1.1589	-0.0988235		7.6362	-1.4019
	-1.5	7.65172	-1.32361	-1.03698	-0.95599	-0.722717	-0.906937	-0.786503	-0.516731	-0.355404	-1.07393	-0.0651817		7.6464	-1.4025
	-1.5	7.66196	-1.21661	-1.13308	-0.943909	-0.70821	-1.04714	-0.783821	-0.642044	-0.251801	-1.11409	-0.202908		7.6567	-1.3966
	-1.5	7.6722	-1.29939	-1.0814	-0.91362	-0.645134	-1.05113	-0.758503	-0.665695	-0.298397	-1.12972	-0.200222		7.6669	-1.3803
	-1.5	7.68244	-1.29932	-1.13302	-0.971485	-0.662182	-0.932125	-0.838501	-0.641617	-0.274509	-1.07085	-0.216522		7.6772	-1.3967
	-1.5	7.69268	-1.27305	-1.13316	-0.970612	-0.621948	-0.873608	-0.844475	-0.594837	-0.303474	-1.037	-0.282955		7.6874	-1.3917
	-1.5	7.70292	-1.35148	-1.11429	-0.935852	-0.723694	-0.979656	-0.888702	-0.582321	-0.324932	-0.985771	-0.150372		7.6976	-1.4135
	-1.5	7.71316	-1.27407	-1.09871	-0.942348	-0.71286	-1.0176	-0.83707	-0.56493	-0.263779	-1.0288	-0.125587		7.7079	-1.3898
	-1.5	7.7234	-1.33021	-1.11921	-0.949383	-0.850723	-1.00262	-0.766235	-0.540146	-0.264946	-1.01395	-0.0883331		7.7181	-1.3831
	-1.5	7.73364	-1.38102	-1.14121	-0.962528	-1.10613	-1.00861	-0.772125	-0.593407	-0.297634	-0.968597	-0.080574		7.7284	-1.3771
	-1.5	7.74388	-1.3768	-1.15304	-0.994183	-0.9855	-1.04124	-0.839634	-0.555153	-0.354591	-0.953812	-0.127003		7.7386	-1.3974
	-1.5	7.75412	-1.34475	-1.18707	-1.0423	-0.79435	-1.11324	-0.862579	-0.534317	-0.188999	-0.930019	-0.120129		7.7488	-1.4165
	-1.5	7.76436	-1.36422	-1.06338	-1.09062	-0.729454	-1.10712	-0.735668	-0.509617	-0.197235	-0.959545	-0.146626		7.7591	-1.4091
	-1.5	7.7746	-1.31977	-1.10167	-1.14088	-0.669182	-1.09252	-0.740177	-0.547939	-0.26799	-1.02369	-0.112022		7.7693	-1.3785
	-1.5	7.78484	-1.3696	-1.1712	-1.12249	-0.710247	-1.06522	-0.81628	-0.599342	-0.240105	-1.0037	-0.0824089		7.7796	-1.3733
	-1.5	7.79508	-1.36662	-1.1613	-1.03831	-0.851654	-1.06599	-0.777287	-0.628754	-0.274578	-1.02933	-0.0522346		7.7898	-1.3779
	-1.5	7.80532	-1.35982	-1.10426	-1.0438	-0.804268	-1.02813	-0.779278	-0.694424	-0.310116	-1.04861	-0.0179749		7.8	-1.3869
	-1.5	7.81556	-1.44149	-1.0263	-1.11518	-0.775288	-1.01505	-0.793499	-0.680264	-0.206547	-1.09961	-0.0461311		7.8103	-1.3627
	-1.5	7.8258	-1.51382	-1.08057	-1.09615	-0.692291	-1.06229	-0.734398	-0.630112	-0.179703	-1.09646	-0.0054512		7.8205	-1.3291
	-1.5	7.83604	-1.51991	-1.13351	-0.988731	-0.709473	-1.02884	-0.720665	-0.591824	-0.140553	-1.0166	-0.0209236		7.8308	-1.2881
	-1.5	7.84628	-1.49539	-1.063	-1.06812	-0.73378	-1.06382	-0.773434	-0.512215	-0.198299	-1.03828	-0.00500488		7.841	-1.2987
	-1.5	7.85652	-1.44175	-1.01402	-1.09182	-0.646412	-1.09042	-0.833698	-0.555355	-0.294407	-1.12472	0.039753		7.8512	-1.3136
	-1.5	7.86676	-1.46945	-1.02169	-1.01326	-0.647018	-1.10245	-0.868637	-0.573357	-0.302784	-1.07091	0.0147934		7.8615	-1.3316
	-1.5	7.877	-1.45029	-1.09744	-1.05947	-0.754784	-1.06489	-0.853138	-0.485607	-0.35854	-1.07906	0.0229836		7.8717	-1.3394
	-1.5	7.88724	-1.38499	-1.11862	-1.06123	-0.794075	-1.04317	-0.829884	-0.477383	-0.32262	-1.1082	-0.0530853		7.882	-1.3389
	-1.5	7.89748	-1.47766	-1.0024	-1.06405	-0.725998	-1.05018	-0.805279	-0.500462	-0.260368	-1.00863	0.00388718		7.8922	-1.3141
	-1.5	7.90772	-1.45906	-1.04013	-1.01965	-0.683868	-0.97728	-0.817581	-0.550682	-0.15847	-1.02358	0.0171661		7.9024	-1.2958
	-1.5	7.91796	-1.4652	-1.04513	-1.10575	-0.778831	-0.950649	-0.805122	-0.514744	-0.132744	-1.06861	0.0343666		7.9127	-1.2929
	-1.5	7.9282	-1.42976	-0.998089	-1.1489	-0.735031	-0.925018	-0.783226	-0.584347	-0.0866013	-1.03206	-0.000919342		7.9229	-1.2794
	-1.5	7.93844	-1.45315	-0.963673	-1.15391	-0.742733	-1.06384	-0.830608	-0.473412	-0.149479	-0.968739	0.0699997		7.9332	-1.2879
	-1.5	7.94868	-1.44267	-1.05336	-1.09688	-0.764797	-1.10289	-0.854332	-0.455017	-0.215824	-1.01342	0.04282		7.9434	-1.2686
	-1.5	7.95892	-1.37831	-0.990723	-1.04988	-0.769875	-1.01603	-0.880653	-0.517899	-0.195137	-0.995071	0.0480766		7.9536	-1.2813
	-1.5	7.96916	-1.41166	-0.962994	-1.02714	-0.705692	-0.938435	-0.754742	-0.456139	-0.119621	-0.977165	0.0541306		7.9639	-1.2537
	-1.5	7.9794	-1.36651	-1.0207	-1.04659	-0.699207	-1.06606	-0.689457	-0.503513	-0.0363884	-0.971123	0.0038147		7.9741	-1.2477
	-1.5	7.98964	-1.38312	-1.04942	-1.06553	-0.605888	-1.12019	-0.7729	-0.545761	-0.109562	-0.963646	0.00976181		7.9844	-1.2252
	-1.5	7.99988	-1.42307	-1.09149	-1.0054	-0.614975	-1.0871	-0.72641	-0.54171	-0.129787	-0.925426	-0.0588875		7.9946	-1.233
	-1.5	8.01012	-1.38307	-0.988003	-1.07335	-0.616276	-0.978771	-0.716694	-0.453732	0.000301361	-0.963184	-0.0643616		8.0048	-1.2223
	-1.5	8.02036	-1.41686	-0.980614	-1.08554	-0.729549	-1.04432	-0.860218	-0.478432	-0.132542	-0.999146	-0.0817986		8.0151	-1.217
	-1.5	8.0306	-1.46121	-0.955517	-1.09317	-0.667942	-1.08279	-0.86536	-0.449558	-0.164356	-1.07544	0.0347252		8.0253	-1.2157
	-1.5	8.04084	-1.45938	-0.904175	-1.07513	-0.617432	-1.09231	-0.745434	-0.410362	-0.0463295	-0.986286	-0.0121346		8.0356	-1.2052
	-1.5	8.05108	-1.36008	-0.896126	-1.02106	-0.673637	-1.05719	-0.791817	-0.507458	-0.115028	-0.917622	-0.0297203		8.0458	-1.1926
	-1.5	8.06132	-1.31514	-0.859051	-1.05392	-0.678337	-1.0299	-0.807041	-0.554974	-0.144093	-0.957565	0.00823593		8.056	-1.1717
	-1.5	8.07156	-1.35078	-0.890347	-1.05172	-0.734253	-1.05688	-0.781151	-0.513535	-0.114647	-0.981495	0.00159836		8.0663	-1.1863
	-1.5	8.0818	-1.39628	-0.870926	-1.05202	-0.65044	-1.03823	-0.732143	-0.497803	-0.152668	-1.02954	-0.0320168		8.0765	-1.1936
	-1.5	8.09204	-1.28001	-0.802204	-1.05144	-0.587021	-1.08488	-0.759773	-0.484665	-0.22176	-1.0279	-0.0160675		8.0868	-1.1467
	-1.5	8.10228	-1.34345	-0.886398	-1.01326	-0.576244	-1.09351	-0.732784	-0.483734	-0.0738297	-0.914318	-0.100819		8.097	-1.1473
	-1.5	8.11252	-1.32389	-0.983234	-0.983166	-0.620457	-1.001	-0.664646	-0.517532	-0.07407	-0.884918	0.00170517		8.1072	-1.16
	-1.5	8.12276	-1.31887	-0.929188	-1.01118	-0.556671	-0.916428	-0.680515	-0.488495	-0.143867	-0.910515	-0.0149879		8.1175	-1.1452
	-1.5	8.133	-1.35592	-0.83514	-0.982143	-0.620052	-0.944164	-0.690529	-0.42952	-0.124176	-0.923866	-0.0374451		8.1277	-1.1313
	-1.5	8.14324	-1.3307	-0.834282	-0.947643	-0.611244	-0.976292	-0.683598	-0.316544	-0.172668	-1.03689	0.0997543		8.138	-1.1381
	-1.5	8.15348	-1.36176	-0.871117	-0.856697	-0.615379	-0.92149	-0.761219	-0.388199	-0.166386	-0.975224	-0.00378799		8.1482	-1.1414
	-1.5	8.16372	-1.32066	-0.848244	-0.879597	-0.73175	-0.907734	-0.76091	-0.454735	-0.22842	-0.898842	-0.0158768		8.1584	-1.1293
	-1.5	8.17396	-1.29779	-0.831432	-0.927624	-0.580204	-0.877422	-0.784943	-0.414989	-0.193134	-0.932068	-0.0741005		8.1687	-1.0943
	-1.5	8.1842	-1.27208	-0.835545	-0.953651	-0.535606	-0.88916	-0.839214	-0.40086	-0.20512	-0.93586	-0.0775108		8.1789	-1.0713
	-1.5	8.19444	-1.32412	-0.798748	-0.996735	-0.569523	-0.879398	-0.783833	-0.328396	-0.146381	-1.01243	-0.019062		8.1892	-1.0822
	-1.5	8.20468	-1.2715	-0.905846	-1.0028	-0.496624	-0.969093	-0.749401	-0.273319	-0.181622	-0.959442	0.0194664		8.1994	-1.0772
	-1.5	8.21492	-1.32867	-0.854092	-0.958977	-0.464283	-1.01914	-0.795933	-0.311455	-0.314339	-0.958725	0.0580788		8.2096	-1.0756
	-1.5	8.22516	-1.33326	-0.885555	-0.998959	-0.54166	-1.04234	-0.782246	-0.359852	-0.2505	-0.926262	0.0966911		8.2199	-1.0576
	-1.5	8.2354	-1.26487	-0.957272	-1.02456	-0.528259	-0.944466	-0.801964	-0.270256	-0.170094	-0.918465	0.0316162		8.2301	-1.0717
	-1.5	8.24564	-1.31281	-0.884922	-0.901112	-0.51807	-0.784496	-0.726959	-0.341579	-0.16399	-0.960522	0.0227547		8.2404	-1.0498
	-1.5	8.25588	-1.35621	-0.870022	-0.912666	-0.510559	-0.90937	-0.682026	-0.321991	-0.186737	-0.8167	-0.042366		8.2506	-1.0447
	-1.5	8.26612	-1.36367	-0.858017	-0.929451	-0.524723	-1.00982	-0.739891	-0.327164	-0.149544	-0.85762	-0.0602837		8.2608	-1.0233
	-1.5	8.27636	-1.3795	-0.864956	-0.963127	-0.5728	-0.898029	-0.700146	-0.360733	-0.148685	-0.840111	-0.0202904		8.2711	-0.9882
	-1.5	8.2866	-1.39619	-0.889404	-0.995781	-0.467705	-0.798634	-0.67968	-0.331947	-0.137218	-0.841782	0.14423		8.2813	-1.0118
	-1.5	8.29684	-1.2589	-0.854855	-1.00604	-0.515018	-0.954868	-0.701256	-0.347073	-0.12521	-0.8843	0.157574		8.2916	-1.0172
	-1.5	8.30708	-1.23473	-0.786453	-0.96035	-0.533218	-0.962879	-0.674625	-0.286766	-0.195225	-0.920769	-0.0296593		8.3018	-0.9985
	-1.5	8.31732	-1.20848	-0.727245	-0.893139	-0.479019	-0.929539	-0.637585	-0.27618	-0.199871	-0.853893	0.0159607		8.312	-0.9941
	-1.5	8.32756	-1.20673	-0.844334	-0.84758	-0.435699	-0.88134	-0.63055	-0.250431	-0.114494	-0.93412	0.0186195		8.3223	-0.9753
	-1.5	8.3378	-1.19001	-0.802357	-0.910721	-0.47208	-0.83268	-0.685123	-0.344975	-0.121277	-0.879055	0.0249863		8.3325	-0.9912
	-1.5	8.34804	-1.21587	-0.751835	-0.914001	-0.488041	-0.829189	-0.704212	-0.347908	-0.145954	-0.741776	0.0327225		8.3428	-0.9529
	-1.5	8.35828	-1.29605	-0.732239	-0.899052	-0.488533	-0.842766	-0.73188	-0.302788	-0.131638	-0.786537	-0.081562		8.353	-0.9364
	-1.5	8.36852	-1.21075	-0.693844	-0.895248	-0.529778	-0.906734	-0.777988	-0.258751	-0.238308	-0.790352	-0.043335		8.3632	-0.9335
	-1.5	8.37876	-1.18571	-0.74416	-0.896202	-0.497829	-0.91917	-0.727077	-0.309711	-0.164013	-0.780922	0.0613327		8.3735	-0.9218
	-1.5	8.389	-1.24936	-0.762157	-0.893604	-0.588097	-0.930111	-0.719948	-0.262066	-0.0684814	-0.818748	0.114929		8.3837	-0.9366
	-1.5	8.39924	-1.21477	-0.742039	-0.884033	-0.565071	-0.920704	-0.703293	-0.193188	-0.074131	-0.920372	0.105476		8.394	-0.9332
	-1.5	8.40948	-1.23164	-0.65728	-0.905418	-0.456593	-0.885822	-0.713329	-0.285797	-0.156635	-0.805328	0.102974		8.4042	-0.8997
	-1.5	8.41972	-1.26303	-0.717255	-0.907787	-0.429317	-0.922016	-0.748878	-0.353748	-0.157505	-0.764923	0.162533		8.4144	-0.8795
	-1.5	8.42996	-1.32249	-0.725323	-0.909496	-0.387405	-0.875774	-0.684528	-0.342686	-0.0924263	-0.860283	0.116909		8.4247	-0.8947
	-1.5	8.4402	-1.26126	-0.646183	-0.8909	-0.391113	-0.865105	-0.672276	-0.255226	-0.117737	-0.817352	0.13195		8.4349	-0.9129
	-1.5	8.45044	-1.1428	-0.619625	-0.856339	-0.424572	-0.841526	-0.615974	-0.224205	-0.0875626	-0.848839	0.0688324		8.4452	-0.8787
	-1.5	8.46068	-1.13143	-0.64183	-0.793625	-0.463341	-0.824287	-0.62191	-0.223083	-0.0523491	-0.791283	0.106178		8.4554	-0.8665
	-1.5	8.47092	-1.11417	-0.692104	-0.867352	-0.464581	-0.939983	-0.621014	-0.169369	0.0183029	-0.805016	0.0861893		8.4656	-0.8611
	-1.5	8.48116	-1.15598	-0.649902	-0.951744	-0.462528	-0.930756	-0.603443	-0.212502	-0.0227509	-0.686554	0.121834		8.4759	-0.8208
	-1.5	8.4914	-1.14417	-0.665695	-0.845242	-0.438663	-0.924946	-0.616627	-0.223228	0.000232697	-0.663395	0.113514		8.4861	-0.8202
	-1.5	8.50164	-1.09542	-0.723034	-0.823582	-0.333248	-0.806778	-0.651402	-0.164326	0.0177231	-0.70055	0.138172		8.4964	-0.8337
	-1.5	8.51188	-1.17889	-0.660545	-0.842812	-0.376915	-0.722172	-0.725838	-0.141808	-0.0596199	-0.639088	0.207687		8.5066	-0.8273
	-1.5	8.52212	-1.17551	-0.592609	-0.81451	-0.411404	-0.758152	-0.650173	-0.152382	-0.0364723	-0.693611	0.195648		8.5168	-0.8163
	-1.5	8.53236	-1.11671	-0.599773	-0.851894	-0.397297	-0.679916	-0.580166	-0.0802231	0.0276642	-0.687737	0.218155		8.5271	-0.8157
	-1.5	8.5426	-1.1163	-0.642593	-0.830364	-0.454971	-0.356121	-0.613216	-0.211601	0.0183983	-0.651604	0.205566		8.5373	-0.8033
	-1.5	8.55284	-1.11217	-0.709961	-0.76519	-0.464771	-0.530476	-0.589664	-0.209194	-0.108799	-0.674156	0.170471		8.5476	-0.7845
	-1.5	8.56308	-1.16435	-0.673038	-0.769577	-0.432144	-0.674702	-0.584072	-0.186344	-0.158817	-0.617748	0.134766		8.5578	-0.7798
	-1.5	8.57332	-1.07039	-0.656628	-0.771198	-0.429367	-0.73711	-0.558014	-0.179146	-0.157673	-0.675529	0.0752792		8.568	-0.7498
	-1.5	8.58356	-1.0363	-0.724228	-0.743603	-0.508724	-0.683731	-0.579617	-0.129433	-0.111549	-0.71711	0.0142593		8.5783	-0.7668
	-1.5	8.5938	-0.996719	-0.660275	-0.764061	-0.477074	-0.730865	-0.576515	-0.065094	-0.109688	-0.688335	0.125561		8.5885	-0.7544
	-1.5	8.60404	-0.984276	-0.642677	-0.857925	-0.41172	-0.64394	-0.545452	-0.104637	-0.035984	-0.629814	0.118313		8.5988	-0.7565
	-1.5	8.61428	-0.901962	-0.679047	-0.800121	-0.404499	-0.713963	-0.58506	-0.281269	-0.0727577	-0.630043	0.13541		8.609	-0.7575
	-1.5	8.62452	-0.962616	-0.617962	-0.734077	-0.395668	-0.672485	-0.666759	-0.164555	-0.0947075	-0.677399	0.112854		8.6192	-0.7377
	-1.5	8.63476	-0.916779	-0.683575	-0.802219	-0.319229	-0.706524	-0.604038	-0.121483	-0.040966	-0.670582	0.128113		8.6295	-0.7051
	-1.5	8.645	-0.971283	-0.562546	-0.782547	-0.343857	-0.761646	-0.653202	-0.0660477	-0.0890656	-0.73114	0.120926		8.6397	-0.7458
	-1.5	8.65524	-0.951054	-0.588997	-0.68718	-0.309395	-0.823395	-0.5933	-0.0324783	-0.0869446	-0.588245	0.167976		8.65	-0.7668
	-1.5	8.66548	-0.929333	-0.595112	-0.586296	-0.352989	-0.743431	-0.608559	-0.0713425	-0.0501328	-0.57481	0.208508		8.6602	-0.7781
	-1.5	8.67572	-0.926117	-0.723751	-0.647793	-0.33004	-0.677753	-0.470165	-0.0518646	0.00844955	-0.679333	0.202869		8.6704	-0.7033
	-1.5	8.68596	-0.898994	-0.706608	-0.558998	-0.252411	-0.650616	-0.455971	-0.00670624	0.0340767	-0.664574	0.307514		8.6807	-0.6718
	-1.5	8.6962	-0.864563	-0.669369	-0.510883	-0.294266	-0.607304	-0.476604	-0.00909042	0.0642242	-0.717312	0.325512		8.6909	-0.6779
	-1.5	8.70644	-0.837044	-0.622437	-0.748371	-0.314701	-0.693913	-0.578075	0.0237503	0.00762177	-0.61166	0.206364		8.7012	-0.6698
	-1.5	8.71668	-0.845818	-0.602848	-0.672638	-0.319313	-0.731449	-0.541016	0.0442543	-0.0348473	-0.564262	0.205574		8.7114	-0.6732
	-1.5	8.72692	-0.835598	-0.755054	-0.644695	-0.304565	-0.666183	-0.546787	0.141338	-0.0388298	-0.590488	0.297462		8.7216	-0.618
	-1.5	8.73716	-0.835049	-0.717457	-0.720058	-0.327408	-0.59964	-0.597687	0.0693245	0.0275078	-0.604706	0.406982		8.7319	-0.6388
	-1.5	8.7474	-0.866581	-0.675411	-0.774574	-0.412239	-0.612179	-0.588772	0.0222855	0.0872307	-0.523064	0.351582		8.7421	-0.6367
	-1.5	8.75764	-0.962021	-0.689896	-0.763584	-0.308861	-0.634068	-0.506134	0.0527802	0.0241699	-0.542065	0.255856		8.7524	-0.6329
	-1.5	8.76788	-0.862682	-0.653122	-0.707352	-0.217281	-0.581924	-0.487404	0.0341682	-0.030571	-0.528091	0.250484		8.7626	-0.6286
	-1.5	8.77812	-0.751904	-0.667316	-0.700699	-0.186932	-0.709099	-0.399158	0.120491	0.0450783	-0.495605	0.291904		8.7728	-0.5842
	-1.5	8.78836	-0.785789	-0.653812	-0.668011	-0.216789	-0.606541	-0.430058	0.122406	0.030056	-0.460464	0.208603		8.7831	-0.5793
	-1.5	8.7986	-0.799454	-0.712666	-0.708916	-0.286289	-0.549843	-0.517185	0.10994	-0.0822601	-0.52037	0.225258		8.7933	-0.5906
	-1.5	8.80884	-0.851692	-0.615032	-0.653698	-0.225319	-0.448196	-0.550182	0.130005	0.00228119	-0.521069	0.314579		8.8036	-0.5711
	-1.5	8.81908	-0.828983	-0.625607	-0.647854	-0.20739	-0.529552	-0.554279	0.12986	0.0443535	-0.467018	0.232803		8.8138	-0.5831
	-1.5	8.82932	-0.807121	-0.586887	-0.660095	-0.14323	-0.463337	-0.5079	0.115673	-0.085598	-0.479633	0.249634		8.824	-0.5852
	-1.5	8.83956	-0.800739	-0.627155	-0.650074	-0.173161	-0.472454	-0.482922	0.0675354	-0.0207024	-0.57127	0.180363		8.8343	-0.5811
	-1.5	8.8498	-0.736225	-0.569542	-0.690269	-0.133224	-0.456398	-0.468929	0.127487	0.0318947	-0.497456	0.296627		8.8445	-0.5631
	-1.5	8.86004	-0.798489	-0.582844	-0.753593	-0.175392	-0.520557	-0.423534	0.123932	0.0083847	-0.495071	0.288761		8.8548	-0.5474
	-1.5	8.87028	-0.794792	-0.591785	-0.681576	-0.160023	-0.627281	-0.475784	0.040451	0.192661	-0.373417	0.195599		8.865	-0.5507
	-1.5	8.88052	-0.727806	-0.602966	-0.620899	-0.135704	-0.514713	-0.437138	0.116043	0.176899	-0.401707	0.138664		8.8752	-0.5292
	-1.5	8.89076	-0.718941	-0.560551	-0.687885	-0.140987	-0.491707	-0.436146	0.17598	0.130383	-0.394421	0.201092		8.8855	-0.5318
	-1.5	8.901	-0.708759	-0.450344	-0.596317	-0.18396	-0.452343	-0.495571	0.194145	-0.00890732	-0.378986	0.322876		8.8957	-0.5665
	-1.5	8.91124	-0.665833	-0.597843	-0.580814	-0.116226	-0.446301	-0.368004	0.176025	-0.000637054	-0.375992	0.297127		8.906	-0.5254
	-1.5	8.92148	-0.730526	-0.582535	-0.606785	-0.230549	-0.474064	-0.373119	0.178497	-0.0232277	-0.34153	0.377728		8.9162	-0.4641
	-1.5	8.93172	-0.689293	-0.562904	-0.637325	-0.242386	-0.467724	-0.348896	0.156254	0.0258064	-0.30344	0.355183		8.9264	-0.4897
	-1.5	8.94196	-0.682259	-0.51585	-0.550758	-0.160633	-0.453514	-0.426121	0.176506	0.0626984	-0.371819	0.34602		8.9367	-0.4802
	-1.5	8.9522	-0.733997	-0.611576	-0.626591	-0.136101	-0.3727	-0.456936	0.241989	0.156315	-0.420433	0.348209		8.9469	-0.4597
	-1.5	8.96244	-0.767662	-0.581631	-0.595509	-0.0698547	-0.367874	-0.453979	0.28894	0.123779	-0.44994	0.289181		8.9572	-0.4592
	-1.5	8.97268	-0.777161	-0.522732	-0.61079	-0.0795097	-0.239635	-0.340649	0.179939	0.0269737	-0.390121	0.264629		8.9674	-0.4934
	-1.5	8.98292	-0.77845	-0.441391	-0.479053	-0.0950089	-0.274399	-0.38261	0.139397	0.00389481	-0.338432	0.230625		8.9776	-0.4754
	-1.5	8.99316	-0.785877	-0.479538	-0.494625	-0.0301704	-0.414566	-0.390369	0.114029	0.0265045	-0.288029	0.171543		8.9879	-0.4344
	-1.5	9.0034	-0.823975	-0.456673	-0.465702	-0.0516624	-0.471657	-0.295681	0.169876	0.0126991	-0.377842	0.157574		8.9981	-0.4231
	-1.5	9.01364	-0.783455	-0.57394	-0.501369	-0.137722	-0.449375	-0.346714	0.184673	0.110023	-0.251434	0.17519		9.0084	-0.4231
	-1.5	9.02388	-0.692188	-0.562069	-0.536633	-0.168812	-0.378994	-0.327011	0.227646	0.199539	-0.139423	0.152576		9.0186	-0.4558
	-1.5	9.03412	-0.729023	-0.508743	-0.60743	-0.175781	-0.479214	-0.359104	0.188107	0.163799	-0.238937	0.249611		9.0288	-0.4541
	-1.5	9.04436	-0.718369	-0.464699	-0.604328	-0.151146	-0.415318	-0.301262	0.185913	0.193279	-0.319035	0.281796		9.0391	-0.4531
	-1.5	9.0546	-0.720989	-0.457474	-0.518536	-0.165546	-0.401546	-0.326569	0.257652	0.174801	-0.348408	0.314983		9.0493	-0.4247
	-1.5	9.06484	-0.655949	-0.441082	-0.406063	-0.129387	-0.485294	-0.418468	0.251274	0.0286026	-0.247009	0.344883		9.0596	-0.4457
	-1.5	9.07508	-0.625572	-0.47887	-0.387154	-0.107895	-0.493114	-0.338192	0.174789	0.00220871	-0.267609	0.280239		9.0698	-0.4065
	-1.5	9.08532	-0.621544	-0.459297	-0.378227	-0.0910492	-0.380711	-0.278694	0.223999	0.130646	-0.287483	0.270924		9.08	-0.4083
	-1.5	9.09556	-0.616623	-0.464016	-0.383053	-0.0579453	-0.363663	-0.380665	0.275089	0.1105	-0.323151	0.268581		9.0903	-0.399
	-1.5	9.1058	-0.640038	-0.422306	-0.397327	-0.0932198	-0.476639	-0.38361	0.226063	0.150402	-0.234432	0.240494		9.1005	-0.3612
	-1.5	9.11604	-0.713623	-0.357899	-0.345638	-0.195183	-0.475815	-0.324184	0.232937	0.0764542	-0.226982	0.216827		9.1108	-0.3698
	-1.5	9.12628	-0.732903	-0.416611	-0.36478	-0.190056	-0.351696	-0.266357	0.333549	0.0751419	-0.248238	0.253735		9.121	-0.3668
	-1.5	9.13652	-0.681816	-0.381039	-0.348816	-0.169266	-0.374714	-0.245235	0.262825	0.103207	-0.273018	0.27462		9.1312	-0.3782
	-1.5	9.14676	-0.704815	-0.383076	-0.389015	-0.133598	-0.359337	-0.254913	0.215332	0.117867	-0.307438	0.318539		9.1415	-0.3684
	-1.5	9.157	-0.537598	-0.342987	-0.433361	-0.132812	-0.35078	-0.343185	0.277916	0.122532	-0.226528	0.31197		9.1517	-0.3249
	-1.5	9.16724	-0.532112	-0.386818	-0.454174	-0.115726	-0.379818	-0.322254	0.32856	0.117405	-0.222977	0.32375		9.162	-0.3022
	-1.5	9.17748	-0.557911	-0.456482	-0.351486	-0.187862	-0.379913	-0.338394	0.364609	0.182972	-0.174339	0.298798		9.1722	-0.3125
	-1.5	9.18772	-0.628433	-0.368855	-0.299942	-0.0970459	-0.342896	-0.324062	0.241177	0.15913	-0.208122	0.339588		9.1824	-0.2632
	-1.5	9.19796	-0.691807	-0.410088	-0.275311	-0.106594	-0.337963	-0.288494	0.223305	0.0635719	-0.145321	0.351032		9.1927	-0.2976
	-1.5	9.2082	-0.696362	-0.38982	-0.302349	-0.175854	-0.348633	-0.280258	0.162308	0.108536	-0.050087	0.372364		9.2029	-0.2966
	-1.5	9.21844	-0.676548	-0.444912	-0.311146	-0.108238	-0.338642	-0.288776	0.146534	0.179237	-0.0414581	0.368999		9.2132	-0.2989
	-1.5	9.22868	-0.752724	-0.408981	-0.331577	-0.122784	-0.324932	-0.248142	0.159672	0.14344	0.0314407	0.346493		9.2234	-0.2763
	-1.5	9.23892	-0.735069	-0.362202	-0.316509	-0.172302	-0.275272	-0.291893	0.255779	0.126514	0.0296288	0.331402		9.2336	-0.28
	-1.5	9.24916	-0.722515	-0.450687	-0.352528	-0.193665	-0.270241	-0.296253	0.208847	0.0836296	0.0113297	0.355267		9.2439	-0.2738
	-1.5	9.2594	-0.662449	-0.434574	-0.380444	-0.171612	-0.33379	-0.284859	0.292828	0.0973778	0.0231209	0.352489		9.2541	-0.2942
	-1.5	9.26964	-0.602009	-0.366051	-0.371433	-0.103493	-0.323669	-0.26849	0.313927	0.114243	0.093502	0.444199		9.2644	-0.2398
	-1.5	9.27988	-0.604729	-0.408585	-0.32246	0.00634384	-0.297634	-0.266941	0.28577	0.103981	0.0991364	0.509834		9.2746	-0.2351
	-1.5	9.29012	-0.522449	-0.404617	-0.303017	-0.0356789	-0.227848	-0.256107	0.357883	0.0368195	0.100178	0.464035		9.2848	-0.2383
	-1.5	9.30036	-0.537468	-0.468452	-0.234486	-0.121868	-0.201229	-0.263218	0.33646	0.0411339	0.203461	0.439774		9.2951	-0.2421
	-1.5	9.3106	-0.5667	-0.416786	-0.221088	-0.148769	-0.254562	-0.270603	0.334599	0.155396	0.26844	0.383839		9.3053	-0.2476
	-1.5	9.32084	-0.468018	-0.407955	-0.237492	-0.123951	-0.293652	-0.302097	0.188416	0.213871	0.183132	0.338291		9.3156	-0.2259
	-1.5	9.33108	-0.624046	-0.463398	-0.23061	-0.0946159	-0.257343	-0.335476	0.166847	0.226467	0.180023	0.379898		9.3258	-0.2113
	-1.5	9.34132	-0.658833	-0.301296	-0.204048	-0.117752	-0.246838	-0.299339	0.163055	0.231846	0.0410118	0.413429		9.336	-0.1948
	-1.5	9.35156	-0.552834	-0.237511	-0.206219	-0.120796	-0.196674	-0.391407	0.229637	0.266895	0.0364494	0.352367		9.3463	-0.1871
	-1.5	9.3618	-0.540924	-0.198551	-0.252281	-0.147148	-0.253277	-0.374371	0.230473	0.274151	0.0245743	0.302151		9.3565	-0.1789
	-1.5	9.37204	-0.497234	-0.214359	-0.271702	-0.160561	-0.250381	-0.34557	0.187698	0.27985	-0.0121307	0.309811		9.3668	-0.2014
	-1.5	9.38228	-0.527702	-0.285336	-0.205994	-0.0474815	-0.282948	-0.344044	0.260849	0.296204	0.143116	0.228271		9.377	-0.1631
	-1.5	9.39252	-0.628151	-0.353024	-0.268185	-0.034256	-0.241711	-0.258465	0.181747	0.22958	0.159401	0.31942		9.3872	-0.1569
	-1.5	9.40276	-0.548134	-0.35091	-0.246296	-0.104424	-0.18108	-0.191948	0.11274	0.264317	0.0621719	0.50882		9.3975	-0.1431
	-1.5	9.413	-0.55455	-0.318668	-0.250031	-0.114342	-0.188236	-0.217743	0.145748	0.297672	0.0467491	0.363495		9.4077	-0.1323
	-1.5	9.42324	-0.615845	-0.344585	-0.219967	-0.068306	-0.252705	-0.179417	0.181534	0.206013	0.205322	0.28434		9.418	-0.1177
	-1.5	9.43348	-0.597527	-0.391014	-0.124241	-0.0649109	-0.193424	-0.391273	0.211159	0.311035	0.238113	0.343014		9.4282	-0.1119
	-1.5	9.44372	-0.636517	-0.379299	-0.207912	-0.10997	-0.184612	-0.617573	0.152496	0.322445	0.23138	0.363289		9.4384	-0.1169
	-1.5	9.45396	-0.66457	-0.329849	-0.255894	-0.0825119	-0.174858	-0.359554	0.201492	0.32061	0.138824	0.345028		9.4487	-0.1091
	-1.5	9.4642	-0.53294	-0.365932	-0.298405	-0.0836487	-0.174133	-0.256153	0.225594	0.260464	0.289268	0.436474		9.4589	-0.1107
	-1.5	9.47444	-0.580574	-0.276112	-0.274357	-0.0236626	-0.147392	-0.205013	0.259392	0.184925	0.341026	0.483059		9.4692	-0.0992
	-1.5	9.48468	-0.634537	-0.207096	-0.233067	0.0271683	-0.0792046	-0.216728	0.175743	0.212772	0.226444	0.531849		9.4794	-0.0935
	-1.5	9.49492	-0.663857	-0.182133	-0.243366	-0.017807	-0.127174	-0.200031	0.189655	0.184689	0.220543	0.435818		9.4896	-0.0941
	-1.5	9.50516	-0.616634	-0.252373	-0.137577	-0.0680084	-0.135735	-0.211475	0.242474	0.202137	0.218674	0.400841		9.4999	-0.1148
	-1.5	9.5154	-0.631344	-0.2943	-0.0834007	-0.0179405	-0.0871468	-0.25074	0.17598	0.162167	0.156837	0.428829		9.5101	-0.096
	-1.5	9.52564	-0.735573	-0.244282	-0.090107	-0.0934219	-0.0545197	-0.257275	0.177101	0.228771	0.135323	0.432564		9.5204	-0.103
	-1.5	9.53588	-0.726162	-0.256748	-0.147305	-0.192223	-0.0378876	-0.192616	0.21748	0.251835	0.203949	0.418545		9.5306	-0.1142
	-1.5	9.54612	-0.684788	-0.25602	-0.150108	-0.202023	0.0139198	-0.144989	0.224091	0.32143	0.214569	0.443554		9.5408	-0.1273
	-1.5	9.55636	-0.658047	-0.304394	-0.194489	-0.148438	-0.076416	-0.148659	0.208206	0.307232	0.147003	0.42112		9.5511	-0.1435
	-1.5	9.5666	-0.677803	-0.25153	-0.104412	-0.0695686	-0.0245361	-0.206928	0.231865	0.329956	0.245575	0.415089		9.5613	-0.1406
	-1.5	9.57684	-0.582657	-0.283119	-0.0400543	-0.0481339	-0.0470085	-0.114151	0.30262	0.303833	0.326923	0.462376		9.5716	-0.1239
	-1.5	9.58708	-0.548492	-0.271637	-0.0561256	0.000583649	-0.0684433	-0.140697	0.230103	0.288185	0.351265	0.440742		9.5818	-0.1068
	-1.5	9.59732	-0.543011	-0.222713	-0.121807	-0.0381813	-0.0863724	-0.147289	0.288513	0.270123	0.393578	0.42635		9.592	-0.1022
	-1.5	9.60756	-0.54084	-0.180847	-0.0988274	-0.115192	-0.125259	-0.140545	0.250484	0.252335	0.331669	0.453365		9.6023	-0.1088
	-1.5	9.6178	-0.546005	-0.232845	-0.0737686	-0.0189667	-0.0778694	-0.127346	0.203865	0.226994	0.277714	0.438416		9.6125	-0.1152
	-1.5	9.62804	-0.572803	-0.265953	-0.0847931	-0.0449295	-0.174812	-0.171085	0.285095	0.220711	0.331848	0.527454		9.6228	-0.1008
	-1.5	9.63828	-0.68203	-0.18198	-0.0469551	-0.118015	-0.0640335	-0.219818	0.311966	0.250454	0.399059	0.398479		9.633	-0.1021
	-1.5	9.64852	-0.653206	-0.145908	-0.0545273	-0.144646	0.0228958	-0.178379	0.1833	0.302109	0.406818	0.425755		9.6432	-0.1061
	-1.5	9.65876	-0.58601	-0.153023	-0.00706863	-0.0437393	-0.0660133	-0.244934	0.157471	0.326809	0.40789	0.380634		9.6535	-0.0942
	-1.5	9.669	-0.469982	-0.190815	-0.0364571	-0.00270462	-0.0563393	-0.247475	0.140099	0.219021	0.29612	0.371433		9.6637	-0.0736
	-1.5	9.67924	-0.51049	-0.237305	-0.058445	-0.0330086	0.00258255	-0.228245	0.147671	0.207607	0.433224	0.391365		9.674	-0.0641
	-1.5	9.68948	-0.529243	-0.278862	-0.0774155	-0.0657539	0.0125237	-0.164005	0.158432	0.307495	0.403469	0.434162		9.6842	-0.0602
	-1.5	9.69972	-0.58366	-0.372978	-0.107944	0.0118027	-0.0736046	-0.168472	0.221508	0.329418	0.353794	0.478962		9.6944	-0.0389
	-1.5	9.70996	-0.614143	-0.403069	-0.0344849	0.0113831	0.110554	-0.122044	0.116516	0.287495	0.362209	0.400841		9.7047	-0.0459
	-1.5	9.7202	-0.438835	-0.275608	-0.0921135	0.099884	0.12241	-0.158123	0.184299	0.318939	0.384109	0.492405		9.7149	-0.0793
	-1.5	9.73044	-0.495125	-0.134655	0.00375748	0.0620728	0.0333748	-0.103611	0.134304	0.249249	0.390461	0.479698		9.7252	-0.0694
	-1.5	9.74068	-0.524342	-0.0975914	0.115242	-0.0125389	-0.00902939	-0.0577888	0.0854912	0.288528	0.384087	0.49604		9.7354	-0.051
	-1.5	9.75092	-0.46344	-0.143703	-0.0280495	0.0357056	-0.0397148	-0.111385	0.146107	0.260536	0.333588	0.509262		9.7456	-0.0282
	-1.5	9.76116	-0.462471	-0.150188	-0.0104294	-0.0575752	0.074646	-0.081131	0.159813	0.29834	0.408978	0.499271		9.7559	-0.0261
	-1.5	9.7714	-0.584827	-0.0671463	0.0119438	0.0130463	0.0977097	-0.0665245	0.197365	0.391182	0.442879	0.479221		9.7661	-0.0418
	-1.5	9.78164	-0.481415	-0.0915489	0.0531082	0.0257607	0.10247	-0.0563583	0.165512	0.362835	0.363853	0.447475		9.7764	-0.0327
	-1.5	9.79188	-0.498081	-0.0308952	0.093174	0.0541725	0.106197	-0.0473213	0.178856	0.281063	0.425556	0.41431		9.7866	-0.0408
	-1.5	9.80212	-0.410606	-0.0116539	0.158703	0.0376587	0.148651	-0.0670624	0.128201	0.330513	0.421696	0.409698		9.7968	0.0041
	-1.5	9.81236	-0.4048	-0.169323	0.0840569	0.00293732	0.108105	0.0201035	0.1805	0.309952	0.389141	0.404083		9.8071	0.0413
	-1.5	9.8226	-0.494324	-0.0819893	0.0733261	-0.00788879	0.0401726	0.0324898	0.212315	0.412327	0.41029	0.357487		9.8173	0.0608
	-1.5	9.83284	-0.39978	-0.108891	0.125549	0.0670242	0.0127754	0.0489655	0.236969	0.462788	0.423473	0.441074		9.8276	0.0311
	-1.5	9.84308	-0.512005	-0.117855	0.088562	0.123848	0.0239334	-0.138325	0.279762	0.326546	0.506405	0.445343		9.8378	-0.0008
	-1.5	9.85332	-0.513565	-0.224682	0.0350609	0.0633507	-0.0539589	-0.0971756	0.220032	0.270565	0.541134	0.40847		9.848	0.0148
	-1.5	9.86356	-0.397018	-0.201103	0.0977287	0.045311	-0.043148	-0.116081	0.123661	0.339779	0.478355	0.409367		9.8583	0.0183
	-1.5	9.8738	-0.333202	-0.0988922	0.0730896	0.0807419	-0.0606079	-0.0737381	0.171844	0.347263	0.458008	0.409985		9.8685	0.0304
	-1.5	9.88404	-0.377285	-0.13139	0.0562401	0.0343819	0.0189857	-0.122784	0.127907	0.364033	0.413937	0.493217		9.8788	0.0347
	-1.5	9.89428	-0.29808	-0.185474	0.131489	0.120522	0.034832	-0.133545	0.160793	0.402039	0.472168	0.402485		9.889	0.0488
	-1.5	9.90452	-0.28241	-0.176807	0.0630989	0.183464	0.0653496	-0.085598	0.255325	0.39967	0.432438	0.404964		9.8992	0.0505
	-1.5	9.91476	-0.348793	-0.184208	0.0234108	0.0894814	0.092083	0.0028801	0.345901	0.398048	0.444359	0.431015		9.9095	0.051
	-1.5	9.925	-0.31451	-0.251766	0.00201797	0.10537	0.133259	0.0529709	0.247162	0.348766	0.537064	0.357533		9.9197	0.0176
	-1.5	9.93524	-0.370632	-0.199158	0.0139694	0.046051	0.0653954	0.0502625	0.12038	0.403362	0.563854	0.34779		9.93	0.0135
	-1.5	9.94548	-0.35894	-0.0159721	-0.0324745	-0.0243073	0.152847	0.0399132	0.197189	0.457031	0.496128	0.313332		9.9402	0.045
	-1.5	9.95572	-0.334145	-0.00447845	-0.0460854	0.0383759	0.227974	-0.0681458	0.255516	0.460762	0.499649	0.363445		9.9504	0.0468
	-1.5	9.96596	-0.377991	-0.0225143	0.0413551	0.0353127	0.12582	0.0577164	0.211411	0.470551	0.531597	0.397564		9.9607	0.0625
	-1.5	9.9762	-0.378788	-0.102837	-0.00310898	0.112045	0.0972328	0.144222	0.185207	0.451702	0.512962	0.389507		9.9709	0.0746
	-1.5	9.98644	-0.317291	-0.0714836	-0.0115967	0.126041	0.113087	0.114231	0.229553	0.449165	0.507191	0.410542		9.9812	0.0585
	-1.5	9.99668	-0.295094	-0.078701	-0.0542488	0.157192	0.143669	0.0956573	0.2397	0.433857	0.477295	0.532661		9.9914	0.1141
	-1.4	4.00387	-0.0553665	-0.451233	0.0172539	-0.163597	-0.249847	-0.0298424	-0.238441	-0.168678	-0.0698013	-0.180992
	-1.4	4.01411	-0.0980759	-0.489796	0.0426102	-0.0795555	-0.115463	0.0269127	-0.258087	-0.126884	-0.0894966	-0.153252
	-1.4	4.02435	-0.157814	-0.53035	-0.0344582	-0.14257	-0.0225983	0.0622215	-0.443401	-0.107765	-0.0954323	-0.212772
	-1.4	4.03459	-0.0833206	-0.472336	-0.0841827	-0.138359	-0.0381927	0.030632	-0.449432	-0.0781517	-0.0894966	-0.163288
	-1.4	4.04483	-0.0370789	-0.541618	0.00789642	-0.113914	-0.0699501	-0.0443115	-0.433052	-0.046505	-0.132675	-0.172241
	-1.4	4.05507	-0.00359344	-0.513176	-0.0149307	-0.206547	-0.0605545	-0.0290298	-0.398731	-0.108501	-0.132687	-0.284275
	-1.4	4.06531	0.105198	-0.487331	0.0254898	-0.193531	-0.0170212	0.0065155	-0.424622	-0.165962	-0.120888	-0.276344
	-1.4	4.07555	0.0746803	-0.322487	0.0736504	-0.103958	-0.137634	-0.0407028	-0.365494	-0.14069	-0.104031	-0.210018
	-1.4	4.08579	-0.0178871	-0.33429	0.102783	-0.0624237	-0.11935	-0.0734634	-0.387135	-0.0219078	-0.128716	-0.195999
	-1.4	4.09603	0.011692	-0.371159	0.0914764	-0.0746918	-0.103981	-0.00716782	-0.347256	-0.0545502	-0.0625687	-0.104126
	-1.4	4.10627	0.0619278	-0.284389	0.107815	-0.163559	-0.0910492	-0.00575256	-0.307823	-0.144073	0.0676689	-0.0713272
	-1.4	4.11651	0.060257	-0.294594	0.0777512	-0.214382	-0.136467	-0.0415497	-0.181404	0.0113258	0.0704689	0.0126762
	-1.4	4.12675	0.0458069	-0.229706	0.0722656	-0.178104	-0.0706177	0.00105667	-0.223064	0.0606651	0.0392838	-0.0485268
	-1.4	4.13699	-0.0327759	-0.301804	0.181049	-0.205681	-0.0737381	0.0458565	-0.211132	-0.0399551	0.0497513	-0.0354614
	-1.4	4.14723	0.104828	-0.24942	0.196316	-0.13023	-0.0256729	0.113388	-0.191353	0.00482941	0.0451508	-0.0161514
	-1.4	4.15747	0.10347	-0.255493	0.219742	-0.066597	0.100639	0.146694	-0.262093	0.030529	-0.0344925	-0.018425
	-1.4	4.16771	0.116341	-0.18121	0.251667	-0.0528412	0.085907	-0.0571556	-0.31707	0.143505	0.00893402	-0.121803
	-1.4	4.17795	0.148575	-0.243176	0.27594	-0.0306091	0.0747147	-0.0692291	-0.321198	0.14032	0.0887299	-0.104794
	-1.4	4.18819	0.130875	-0.203362	0.27887	-0.061615	0.101521	0.09869	-0.307167	0.170433	0.106674	-0.0724411
	-1.4	4.19843	0.181328	-0.198807	0.32391	-0.0772552	0.118282	0.109451	-0.302719	0.216019	0.145107	-0.0336266
	-1.4	4.20867	0.242744	-0.0996475	0.308842	-0.076149	0.151436	0.0681839	-0.243675	0.23513	0.047287	-0.0189972
	-1.4	4.21891	0.184235	-0.12727	0.296597	-0.0488014	0.207512	0.0303345	-0.0667229	0.208855	0.0762062	-0.0106049
	-1.4	4.22915	0.102745	-0.1642	0.414543	-0.0506821	0.279755	0.162777	-0.161026	0.147247	0.149551	0.0169106
	-1.4	4.23939	0.170479	-0.134163	0.407318	0.0571899	0.324516	0.241272	-0.298428	0.163162	0.211601	0.080719
	-1.4	4.24963	0.330181	-0.0523834	0.368858	0.0469742	0.34111	0.124451	-0.311745	0.110367	0.156395	0.0488663
	-1.4	4.25987	0.329456	0.130951	0.428337	0.0646629	0.331512	0.115341	-0.196053	0.129902	0.172035	0.0406647
	-1.4	4.27011	0.319595	0.193546	0.371094	0.0980415	0.324432	0.136177	-0.123039	0.208473	0.277298	0.195232
	-1.4	4.28035	0.221928	0.251312	0.358013	0.0907707	0.423805	0.299114	-0.0966797	0.260426	0.336926	0.249439
	-1.4	4.29059	0.225159	0.2267	0.375359	0.155643	0.390381	0.297195	-0.000808716	0.223186	0.44561	0.248375
	-1.4	4.30083	0.290329	0.311516	0.47559	0.20602	0.420334	0.227077	0.0343895	0.2416	0.481171	0.131073
	-1.4	4.31107	0.415199	0.336693	0.597878	0.249428	0.517792	0.23822	0.0274277	0.347172	0.552315	0.212757
	-1.4	4.32131	0.403778	0.351547	0.62664	0.192406	0.57172	0.333508	0.101673	0.407555	0.549072	0.231186
	-1.4	4.33155	0.504776	0.456131	0.657349	0.269131	0.535561	0.39217	0.176392	0.445679	0.490623	0.203838
	-1.4	4.34179	0.588768	0.56958	0.697701	0.318115	0.631691	0.430984	0.292694	0.498188	0.556168	0.297062
	-1.4	4.35203	0.734028	0.654495	0.722973	0.290581	0.649136	0.440083	0.315144	0.444565	0.690346	0.339928
	-1.4	4.36227	0.809116	0.704048	0.788048	0.32938	0.683907	0.427376	0.313427	0.501514	0.745075	0.391464
	-1.4	4.37251	0.748055	0.80378	0.882427	0.448151	0.740913	0.476997	0.362755	0.535881	0.796906	0.523766
	-1.4	4.38275	0.75206	0.836861	0.994415	0.619026	0.858612	0.545494	0.467503	0.637207	0.837082	0.60548
	-1.4	4.39299	0.836285	0.888512	0.993805	0.652332	0.807049	0.547882	0.557186	0.646141	0.849136	0.631802
	-1.4	4.40323	1.01329	0.934597	1.02219	0.618645	0.785282	0.563496	0.483372	0.600708	0.794918	0.756947
	-1.4	4.41347	0.996883	1.04119	0.989311	0.705605	0.861336	0.529083	0.545815	0.696304	0.874191	0.698463
	-1.4	4.42371	1.02279	1.03275	1.07414	0.832371	0.958221	0.644882	0.556328	0.773098	0.954239	0.703747
	-1.4	4.43395	1.03051	1.10942	1.14305	0.820511	1.09286	0.747784	0.639877	0.732574	1.08765	0.780575
	-1.4	4.44419	1.03695	1.24442	1.28626	0.899738	1.1139	0.760525	0.691368	0.816395	1.27982	0.819809
	-1.4	4.45443	1.15708	1.3988	1.29055	1.09782	1.13711	0.757465	0.781284	0.877846	1.27908	0.849705
	-1.4	4.46467	1.21435	1.4461	1.33187	1.15137	1.32963	0.839752	0.873863	0.94503	1.261	0.748505
	-1.4	4.47491	1.24976	1.51329	1.44677	1.2404	1.33795	0.971954	0.834999	1.04258	1.28512	0.837357
	-1.4	4.48515	1.46088	1.68434	1.48112	1.296	1.35485	1.01529	0.888477	1.0702	1.42767	0.949638
	-1.4	4.49539	1.61463	1.7788	1.59072	1.37401	1.5521	1.13665	0.996101	1.21585	1.57712	1.09398
	-1.4	4.50563	1.7499	1.9763	1.62865	1.47249	1.72448	1.16278	1.09224	1.17742	1.60784	1.12379
	-1.4	4.51587	1.78841	1.9989	1.82294	1.69035	1.80318	1.25097	1.21795	1.22185	1.62589	1.17765
	-1.4	4.52611	1.91631	2.1305	1.83629	1.77827	1.83234	1.33291	1.27744	1.12861	1.64514	1.24538
	-1.4	4.53635	2.05755	2.29928	1.93112	1.92667	1.99631	1.5426	1.4335	1.29259	1.87553	1.30207
	-1.4	4.54659	2.14164	2.44944	1.95816	1.99213	2.15157	1.66622	1.51694	1.43451	1.93099	1.22772
	-1.4	4.55683	2.28673	2.57129	1.9634	1.96753	2.28278	1.8314	1.59202	1.46486	2.04545	1.18857
	-1.4	4.56707	2.36747	2.74056	2.06548	2.15108	2.43665	2.00785	1.78247	1.55919	2.21822	1.37265
	-1.4	4.57731	2.5266	2.97095	2.1789	2.2746	2.68716	2.08112	1.95041	1.73761	2.41767	1.46816
	-1.4	4.58755	2.70844	3.23101	2.27114	2.47545	2.74787	2.17749	2.03235	1.83884	2.58924	1.41753
	-1.4	4.59779	2.81207	3.49922	2.42503	2.86254	2.97435	2.35339	2.13772	1.85698	2.69569	1.48231
	-1.4	4.60803	3.10542	3.76086	2.62827	3.07712	3.19125	2.46268	2.31364	2.4443	2.83405	1.53669
	-1.4	4.61827	3.36301	4.03589	2.72672	3.28238	3.32579	2.621	2.53484	2.60762	2.97791	1.68628
	-1.4	4.62851	3.54632	4.31453	2.83686	3.53033	3.55945	2.67716	2.64379	2.35183	3.08555	1.84978
	-1.4	4.63875	3.79752	4.64414	3.04832	3.8075	3.88958	2.80014	2.77656	2.39313	3.27522	1.99035
	-1.4	4.64899	3.95456	4.92493	3.23382	4.168	4.13254	2.99019	3.01963	2.54517	3.54839	1.9533
	-1.4	4.65923	4.22763	5.18931	3.44624	4.46281	4.41801	3.23674	3.25682	2.74937	3.86056	2.03513
	-1.4	4.66947	4.47266	5.40437	3.64972	4.70865	4.81808	3.49604	3.54488	2.93998	4.17217	2.1726
	-1.4	4.67971	4.79668	5.76298	3.96741	4.94852	4.9953	3.81555	3.88695	2.99335	4.44652	2.29366
	-1.4	4.68995	5.19602	6.13356	4.09467	5.2466	5.26417	4.08147	4.2189	3.16666	4.77467	2.3888
	-1.4	4.70019	5.43786	6.37369	4.33656	5.47054	5.56773	4.47925	4.52454	3.41135	5.08023	2.54406
	-1.4	4.71043	5.67263	6.64011	4.64148	5.76532	5.86611	4.77286	4.76491	3.71712	5.41274	2.57434
	-1.4	4.72067	6.00919	6.85603	4.92748	6.15552	6.16267	5.03046	4.98158	3.95662	5.64281	2.70189
	-1.4	4.73091	6.23988	7.15378	5.24472	6.44495	6.39812	5.31097	5.37715	4.24509	5.81987	2.94252
	-1.4	4.74115	6.61497	7.4866	5.51192	6.84288	6.69282	5.58962	5.61177	4.43	6.1358	3.02776
	-1.4	4.75139	6.86485	7.80228	5.78238	7.15993	7.00655	5.86066	5.80643	4.69057	6.41201	3.17563
	-1.4	4.76163	7.19324	8.22396	6.05832	7.46188	7.35329	6.14391	6.17285	5.0339	6.61984	3.38689
	-1.4	4.77187	7.51156	8.51143	6.36336	7.67042	7.66661	6.43839	6.56281	5.29031	6.95545	3.48054
	-1.4	4.78211	7.75502	8.76903	6.62376	7.97319	8.05906	6.65298	6.83744	5.6118	7.30205	3.67838
	-1.4	4.79235	8.12535	9.1465	6.92561	8.33207	8.3541	6.92378	7.04799	5.84117	7.55728	3.7921
	-1.4	4.80259	8.50436	9.47784	7.19688	8.71873	8.64412	7.25225	7.36528	6.06136	7.90292	4.07135
	-1.4	4.81283	8.80537	9.83376	7.57252	9.00765	8.97103	7.66714	7.62043	6.30256	8.2467	4.32458
	-1.4	4.82307	9.11997	10.1808	7.84933	9.37814	9.36837	8.03415	7.94722	6.69678	8.62373	4.51658
	-1.4	4.83331	9.55116	10.4952	8.07144	9.74121	9.64834	8.28793	8.25932	7.03868	8.98432	4.7395
	-1.4	4.84355	9.94799	10.7096	8.34446	10.1235	9.87067	8.69309	8.6525	7.35939	9.30827	4.99887
	-1.4	4.85379	10.2167	11.0801	8.68426	10.3808	10.1859	9.03855	8.93342	7.69181	9.61627	5.22207
	-1.4	4.86403	10.5375	11.2758	9.04081	10.6808	10.5545	9.34605	9.26845	7.94413	9.91307	5.59503
	-1.4	4.87427	10.7996	11.6153	9.43283	11.1133	10.8055	9.75886	9.587	8.27005	10.3072	5.84046
	-1.4	4.88451	11.0357	11.9683	9.7412	11.4304	11.1368	9.99183	9.96054	8.51586	10.5984	6.1219
	-1.4	4.89475	11.3104	12.2323	10.1306	11.602	11.4296	10.2771	10.1909	8.87612	10.8511	6.39151
	-1.4	4.90499	11.6293	12.452	10.4405	11.7741	11.714	10.7324	10.4812	9.25954	11.2111	6.59348
	-1.4	4.91523	11.9253	12.5623	10.6867	11.9593	11.9504	11.1445	10.777	9.52593	11.4739	6.8659
	-1.4	4.92547	12.1598	12.6494	11.0167	12.1298	12.2749	11.3435	10.9728	9.9036	11.7507	7.20164
	-1.4	4.93571	12.3769	12.8072	11.3794	12.3024	12.5741	11.5996	11.2737	10.3018	12.0131	7.52826
	-1.4	4.94595	12.5743	13.0054	11.7773	12.5252	12.7551	11.8669	11.4914	10.5676	12.2639	7.7379
	-1.4	4.95619	12.8475	13.0836	12.0263	12.8098	13.0343	12.2353	11.7995	11.0072	12.4612	8.05961
	-1.4	4.96643	13.026	13.2447	12.2934	13.0062	13.2126	12.5113	11.9874	11.2821	12.6477	8.45675
	-1.4	4.97667	13.1637	13.3782	12.5394	13.1774	13.3499	12.7335	12.2553	11.4676	12.9403	8.80703
	-1.4	4.98691	13.4454	13.496	12.7916	13.2447	13.5076	12.9293	12.4835	11.656	13.1831	9.07213
	-1.4	4.99715	13.5963	13.6369	12.9558	13.4075	13.6618	13.1481	12.6949	11.9265	13.2782	9.42682
	-1.4	5.00739	13.6617	13.6718	13.215	13.5245	13.7203	13.3872	12.8329	12.2473	13.3452	9.75677
	-1.4	5.01763	13.9202	13.6741	13.4032	13.5536	13.8243	13.5868	12.9328	12.3905	13.4884	10.0649
	-1.4	5.02787	14.0102	13.7008	13.5084	13.601	13.8621	13.5572	13.1293	12.6408	13.6143	10.3701
	-1.4	5.03811	14.1071	13.7403	13.7208	13.6748	13.9319	13.697	13.1735	12.9094	13.7002	10.7256
	-1.4	5.04835	14.0795	13.7482	13.8474	13.7277	14.0604	13.8239	13.2894	13.0393	13.894	10.9098
	-1.4	5.05859	14.1679	13.789	13.9475	13.6681	14.1122	13.9458	13.2929	13.2299	13.9526	11.1649
	-1.4	5.06883	14.2187	13.8535	14.0146	13.6992	14.148	13.9708	13.369	13.3475	13.9591	11.4387
	-1.4	5.07907	14.3212	13.8139	14.1799	13.7501	13.9451	13.9127	13.5566	13.4657	14.0236	11.8287
	-1.4	5.08931	14.2953	13.6656	14.2038	13.7716	14.077	14.0009	13.5469	13.5694	14.0631	11.9947
	-1.4	5.09955	14.3312	13.6569	14.2795	13.7883	14.0433	14.0534	13.6184	13.5869	14.0768	12.2872
	-1.4	5.10979	14.313	13.6481	14.2668	13.7541	13.9428	14.0697	13.6383	13.6386	13.9867	12.4967
	-1.4	5.12003	14.207	13.5643	14.275	13.6799	13.8712	14.1877	13.6085	13.6585	14.0057	12.7485
	-1.4	5.13027	14.1755	13.5063	14.2409	13.5754	14.0047	14.1743	13.6443	13.7245	14.0666	12.9707
	-1.4	5.14051	14.103	13.37	14.2503	13.4468	13.9997	14.056	13.5254	13.7465	13.9659	13.0899
	-1.4	5.15075	14.0332	13.3355	14.1317	13.4356	13.8598	14.0368	13.5719	13.7319	13.9465	13.1518
	-1.4	5.16099	14.0463	13.2332	14.1564	13.3378	13.766	14.0413	13.5287	13.7236	13.8078	13.2792
	-1.4	5.17123	13.9116	13.1714	14.2262	13.1629	13.6569	13.9787	13.4845	13.6467	13.723	13.4523
	-1.4	5.18147	13.8114	13.083	14.1959	13.2427	13.5617	13.8593	13.4019	13.6489	13.6381	13.5571
	-1.4	5.19171	13.6132	12.9905	14.0022	13.2274	13.4173	13.8291	13.192	13.7801	13.6226	13.6008
	-1.4	5.20195	13.4952	12.8699	13.9052	12.979	13.2526	13.742	13.2155	13.6676	13.5158	13.6558
	-1.4	5.21219	13.4714	12.7888	13.8471	12.7731	13.236	13.6221	13.1903	13.6207	13.336	13.7305
	-1.4	5.22243	13.4265	12.6967	13.913	12.6659	13.1449	13.5683	13.1013	13.5713	13.2716	13.7731
	-1.4	5.23267	13.3052	12.5877	13.8778	12.5279	13.0699	13.4183	12.9534	13.5039	13.165	13.8148
	-1.4	5.24291	13.2155	12.3857	13.7083	12.4239	12.9873	13.2786	12.8363	13.529	13.0532	13.8931
	-1.4	5.25315	13.0061	12.2031	13.5612	12.2873	12.8115	13.1967	12.6466	13.3623	12.975	13.911
	-1.4	5.26339	12.8294	12.0364	13.3743	12.1348	12.6565	13.0678	12.5204	13.3704	12.8881	13.8451
	-1.4	5.27363	12.7197	11.8604	13.2019	12.0257	12.4914	12.9118	12.4875	13.1771	12.7243	13.8793
	-1.4	5.28387	12.5705	11.705	13.1262	11.863	12.43	12.7485	12.3494	13.021	12.5611	13.8952
	-1.4	5.29411	12.3827	11.5998	13.0176	11.6884	12.2276	12.6396	12.2476	12.9275	12.4422	13.9005
	-1.4	5.30435	12.3302	11.4135	12.9407	11.6202	12.004	12.5262	12.0572	12.7499	12.2789	13.8227
	-1.4	5.31459	12.1272	11.2433	12.7603	11.4929	11.8844	12.3278	11.9825	12.6451	12.1341	13.7888
	-1.4	5.32483	11.8739	11.0581	12.562	11.3771	11.7978	12.1126	11.8394	12.5358	12.0386	13.7562
	-1.4	5.33507	11.7575	10.942	12.3811	11.2136	11.6641	11.9935	11.672	12.4056	11.8485	13.6418
	-1.4	5.34531	11.633	10.7538	12.2416	11.165	11.5798	11.8809	11.5165	12.3315	11.7418	13.4191
	-1.4	5.35555	11.4819	10.6481	12.1022	11.0911	11.4281	11.618	11.3657	12.1427	11.4742	13.3573
	-1.4	5.36579	11.2937	10.4409	11.9205	10.9012	11.153	11.5641	11.1921	11.9895	11.2316	13.3125
	-1.4	5.37603	11.2146	10.2939	11.6813	10.7452	11.0936	11.4694	11.128	11.8169	11.1677	13.1766
	-1.4	5.38627	10.9671	10.1297	11.5129	10.6151	10.9285	11.3185	10.9949	11.7882	11.1322	12.9967
	-1.4	5.39651	10.8795	9.98997	11.4287	10.3843	10.7642	11.153	10.7563	11.5987	11.0078	12.8208
	-1.4	5.40675	10.6978	9.82657	11.3331	10.1802	10.563	11.0029	10.5488	11.4628	10.7887	12.6949
	-1.4	5.41699	10.5487	9.6586	11.1726	10.0271	10.464	10.737	10.448	11.192	10.2525	12.6064
	-1.4	5.42723	10.4615	9.47449	10.9511	9.99712	10.2559	10.5493	10.2979	11.0502	10.1232	12.5003
	-1.4	5.43747	10.3279	9.31672	10.8486	9.82267	9.98746	10.4724	10.108	10.9313	10.1301	12.5114
	-1.4	5.44771	10.2149	9.18348	10.7622	9.52347	9.80567	10.339	10.0029	10.7721	10.137	12.2569
	-1.4	5.45795	10.0212	9.00858	10.6204	9.35574	9.64675	10.2691	9.86629	10.6515	10.0105	12.0494
	-1.4	5.46819	9.85907	8.97044	10.4098	9.25826	9.44349	10.0805	9.6709	10.5373	9.91651	11.8595
	-1.4	5.47843	9.67093	8.80279	10.3319	9.15471	9.38514	9.93331	9.43661	10.5226	9.77276	11.8084
	-1.4	5.48867	9.58869	8.64001	10.1279	8.97128	9.2507	9.81107	9.40057	10.4106	9.59802	11.6067
	-1.4	5.49891	9.46122	8.49839	10.0504	8.78986	8.99862	9.69983	9.30589	10.1863	9.51575	11.3917
	-1.4	5.50915	9.37807	8.48864	9.8786	8.72314	8.86612	9.57581	9.14905	10.0055	9.3376	11.2535
	-1.4	5.51939	9.1969	8.34259	9.74324	8.58062	8.68565	9.43595	9.00186	9.77584	9.13952	11.0937
	-1.4	5.52963	8.92797	8.20889	9.70217	8.45284	8.59151	9.19825	8.86679	9.71653	8.90822	10.9178
	-1.4	5.53987	8.84204	8.01549	9.54401	8.26963	8.49231	9.09976	8.68662	9.67022	8.86584	10.8372
	-1.4	5.55011	8.57803	7.90201	9.44863	8.24193	8.31459	8.99564	8.58577	9.50026	8.76331	10.6056
	-1.4	5.56035	8.4853	7.85765	9.41097	8.12507	8.19235	8.84005	8.49188	9.30991	8.60441	10.4347
	-1.4	5.57059	8.3669	7.79836	9.28415	7.98916	8.06288	8.69075	8.27697	9.14349	8.58329	10.3806
	-1.4	5.58083	8.2747	7.61548	9.06799	7.8972	7.89828	8.52742	8.15052	9.02217	8.42245	10.1815
	-1.4	5.59107	8.15189	7.43399	8.98201	7.74713	7.77959	8.50999	8.039	8.90452	8.32275	9.99109
	-1.4	5.60131	8.08878	7.35503	8.83784	7.68408	7.66217	8.3386	7.98485	8.7213	8.25307	9.83839
	-1.4	5.61155	7.95311	7.25194	8.6247	7.50461	7.50098	8.16098	7.92575	8.57979	8.04013	9.70396
	-1.4	5.62179	7.83155	7.07095	8.46305	7.37461	7.39434	8.00198	7.81085	8.50748	7.9259	9.66678
	-1.4	5.63203	7.65235	7.08606	8.38049	7.15807	7.28587	7.87204	7.72588	8.32218	7.83258	9.56062
	-1.4	5.64227	7.45384	7.04781	8.27712	7.08288	7.17033	7.71069	7.53717	8.17727	7.72719	9.34583
	-1.4	5.65251	7.35914	6.94678	8.28656	7.0701	7.01237	7.5508	7.49564	8.03995	7.5158	9.08143
	-1.4	5.66275	7.24135	6.76942	8.0724	6.99642	6.93838	7.5197	7.38717	7.88869	7.36883	8.98836
	-1.4	5.67299	7.17714	6.73404	7.95578	6.86373	6.75488	7.43251	7.22013	7.7373	7.343	8.85213
	-1.4	5.68323	7.14913	6.61088	7.76278	6.73267	6.73825	7.2305	7.10419	7.64822	7.19673	8.66152
	-1.4	5.69347	7.07416	6.48728	7.76109	6.59017	6.53188	7.26259	6.95498	7.45285	7.06963	8.65653
	-1.4	5.70371	6.96036	6.40703	7.6103	6.53001	6.51962	7.14465	6.80934	7.34683	6.92971	8.53439
	-1.4	5.71395	6.84224	6.37175	7.54372	6.43069	6.39486	6.95098	6.65058	7.21298	6.83177	8.35504
	-1.4	5.72419	6.76685	6.20581	7.45433	6.31043	6.36391	6.91159	6.51203	7.11653	6.75973	8.13241
	-1.4	5.73443	6.674	6.06519	7.30035	6.19982	6.11641	6.78732	6.45432	6.98082	6.68438	8.0584
	-1.4	5.74467	6.4796	5.89183	7.13533	6.09476	6.0196	6.53168	6.37557	6.79206	6.56249	7.84024
	-1.4	5.75491	6.34087	5.70858	7.04401	6.15804	5.9317	6.44143	6.18106	6.65666	6.49123	7.78684
	-1.4	5.76515	6.2425	5.60698	6.9343	6.05354	5.79538	6.40466	6.09004	6.50574	6.41109	7.72913
	-1.4	5.77539	6.19348	5.5862	6.82059	5.83345	5.76017	6.42805	6.0305	6.49126	6.29024	7.60794
	-1.4	5.78563	6.05989	5.48453	6.81047	5.79864	5.69531	6.26988	6.00637	6.34045	6.18974	7.41637
	-1.4	5.79587	5.83978	5.35722	6.57308	5.7189	5.61581	6.18636	5.85181	6.20338	5.95456	7.23164
	-1.4	5.80611	5.67364	5.24441	6.43809	5.59547	5.56418	6.19268	5.72688	6.12117	5.93423	7.17695
	-1.4	5.81635	5.61124	5.14909	6.33142	5.50811	5.47338	6.05978	5.7162	5.95611	5.84224	7.02988
	-1.4	5.82659	5.58699	5.07275	6.11469	5.45403	5.24383	5.87614	5.60075	5.94076	5.72843	7.01149
	-1.4	5.83683	5.4826	5.01151	6.03023	5.41965	5.18541	5.75207	5.4651	5.87512	5.65138	6.86374
	-1.4	5.84707	5.36774	4.94238	5.94874	5.27392	5.22027	5.76799	5.41671	5.74661	5.55082	6.76085
	-1.4	5.85731	5.29559	4.92463	5.9095	5.16301	5.10149	5.70095	5.39733	5.63804	5.416	6.70373
	-1.4	5.86755	5.14818	4.75733	5.92232	5.10383	4.8456	5.5789	5.29172	5.47462	5.30929	6.57616
	-1.4	5.87779	5.02578	4.66661	5.69706	4.9559	4.78951	5.48429	5.23499	5.33757	5.21923	6.47452
	-1.4	5.88803	5.04147	4.5982	5.6026	4.80502	4.63787	5.36904	5.20626	5.31495	5.17712	6.42324
	-1.4	5.89827	4.97587	4.40783	5.51155	4.77351	4.60738	5.2688	4.99949	5.22066	5.14118	6.31934
	-1.4	5.90851	4.87368	4.37403	5.43911	4.70028	4.55815	5.15228	4.88102	5.08115	5.07227	6.17859
	-1.4	5.91875	4.78376	4.27243	5.4249	4.63584	4.39501	5.03513	4.76709	5.06953	4.97091	6.04417
	-1.4	5.92899	4.71944	4.24055	5.31319	4.54435	4.34241	4.93532	4.68613	4.94473	4.87185	5.90564
	-1.4	5.93923	4.67438	4.14178	5.23637	4.40478	4.23853	4.88148	4.66435	4.89328	4.77876	5.75662
	-1.4	5.94947	4.55301	4.04478	5.14797	4.33115	4.04146	4.82328	4.55648	4.79617	4.74642	5.7382
	-1.4	5.95971	4.44028	4.03603	4.98241	4.31389	3.95543	4.77748	4.47911	4.71738	4.61934	5.67949
	-1.4	5.96995	4.43198	4.02364	4.93384	4.19214	3.75795	4.64432	4.45496	4.66919	4.43052	5.56357
	-1.4	5.98019	4.27713	3.84063	4.90914	4.07541	3.77692	4.58394	4.3634	4.53022	4.349	5.4842
	-1.4	5.99043	4.25643	3.85236	4.78291	4.0765	3.76648	4.51223	4.3681	4.46904	4.25108	5.38428
	-1.4	6.00067	4.24996	3.81404	4.79083	4.03411	3.77122	4.43436	4.22069	4.34456	4.16869	5.2769
	-1.4	6.01091	4.18562	3.66985	4.67048	3.84831	3.7239	4.41787	4.08149	4.30439	4.14886	5.16458
	-1.4	6.02115	4.10306	3.63965	4.62343	3.80264	3.67134	4.33396	4.07117	4.16475	4.06815	5.06524
	-1.4	6.03139	4.02689	3.61849	4.56789	3.7508	3.56824	4.19719	3.96021	4.12234	3.93139	4.99096
	-1.4	6.04163	3.96208	3.49179	4.45024	3.61147	3.52772	4.0713	3.87825	4.03455	3.85557	4.91245
	-1.4	6.05187	3.8037	3.39455	4.34505	3.58908	3.40749	3.95634	3.7561	3.97862	3.83703	4.85691
	-1.4	6.06211	3.78313	3.30388	4.27485	3.46201	3.18612	3.84631	3.67015	3.86958	3.77158	4.71672
	-1.4	6.07235	3.67394	3.17503	4.25219	3.40372	3.14054	3.77957	3.5859	3.7778	3.69906	4.66887
	-1.4	6.08259	3.55012	3.07413	4.20226	3.43341	3.09164	3.76988	3.52608	3.73907	3.61897	4.61188
	-1.4	6.09283	3.4898	2.97906	3.98233	3.37696	3.07559	3.76112	3.45705	3.64571	3.48735	4.47411
	-1.4	6.10307	3.42662	3.03123	3.85072	3.26524	2.93797	3.67994	3.29658	3.4967	3.36627	4.43164
	-1.4	6.11331	3.38815	2.9544	3.79969	3.15949	2.8688	3.54132	3.244	3.46632	3.29025	4.32804
	-1.4	6.12355	3.33147	2.96093	3.79641	3.15405	2.84078	3.43682	3.18178	3.38802	3.05251	4.29945
	-1.4	6.13379	3.27031	2.87719	3.70664	3.1214	2.79879	3.41793	3.14655	3.36658	3.04972	4.20671
	-1.4	6.14403	3.10215	2.68616	3.64983	3.08205	2.70385	3.36786	3.13596	3.35167	3.05695	4.08858
	-1.4	6.15427	3.13154	2.60979	3.59757	3.02359	2.51446	3.26423	2.98759	3.15259	2.91986	4.03275
	-1.4	6.16451	3.09094	2.59038	3.59719	2.88886	2.59285	3.24316	2.85932	3.07365	2.96043	3.9727
	-1.4	6.17475	3.02392	2.5434	3.42074	2.79694	2.5579	3.13996	2.86791	3.06506	2.82392	3.8854
	-1.4	6.18499	3.03386	2.4383	3.3606	2.64214	2.46697	3.13126	2.79803	3.04924	2.75255	3.72818
	-1.4	6.19523	2.84836	2.33937	3.25526	2.69661	2.37534	3.07085	2.68281	2.94199	2.77365	3.65423
	-1.4	6.20547	2.71448	2.26453	3.13735	2.60145	2.25689	2.89463	2.69051	2.8894	2.66729	3.49688
	-1.4	6.21571	2.67422	2.21884	3.17928	2.60608	2.17326	2.85867	2.74745	2.87173	2.64319	3.49375
	-1.4	6.22595	2.71336	2.1407	3.02699	2.53902	2.19683	2.80875	2.70755	2.81432	2.59105	3.86097
	-1.4	6.23619	2.63914	2.21011	3.04841	2.52561	2.16582	2.7537	2.57793	2.72745	2.55664	3.74799
	-1.4	6.24643	2.55612	2.22289	2.99564	2.45183	2.10878	2.73236	2.47028	2.6153	2.50323	3.37657
	-1.4	6.25667	2.5204	2.01238	2.89538	2.43139	2.0235	2.65864	2.41212	2.54736	2.38191	3.14407
	-1.4	6.26691	2.49759	1.91356	2.77545	2.43895	1.96041	2.58039	2.46332	2.50166	2.33387	3.12811
	-1.4	6.27715	2.49961	1.80303	2.73852	2.29171	1.94188	2.50756	2.40755	2.49708	2.35668	3.06485
	-1.4	6.28739	2.41643	1.69321	2.72975	2.10927	1.84473	2.39121	2.28906	2.57891	2.26033	2.9676
	-1.4	6.29763	2.36026	1.7349	2.67107	2.05671	1.78329	2.30635	2.21897	2.46501	2.19801	2.85752
	-1.4	6.30787	2.25621	1.71737	2.58533	2.10097	1.74268	2.21461	2.13676	2.32104	2.13557	2.80331
	-1.4	6.31811	2.21312	1.6232	2.49091	2.03561	1.69257	2.17201	2.08019	2.21249	2.03376	2.63254
	-1.4	6.32835	2.14651	1.54035	2.53184	2.04691	1.64315	2.23623	2.0393	2.14866	2.03391	2.57711
	-1.4	6.33859	2.12318	1.53919	2.42585	1.99034	1.5849	2.21716	1.92208	2.03893	2.01939	2.52298
	-1.4	6.34883	2.08632	1.56757	2.33629	1.86562	1.55809	2.11415	1.84286	2.01193	1.937	2.47565
	-1.4	6.35907	2.03541	1.51601	2.24551	1.77167	1.42493	2.08449	1.77525	1.91823	1.85487	2.45004
	-1.4	6.36931	2.0166	1.44772	2.09499	1.73916	1.34657	2.07346	1.71217	1.87346	1.85393	2.28794
	-1.4	6.37955	1.92153	1.36107	2.03686	1.66323	1.35913	2.04278	1.72336	1.81258	1.83865	2.31455
	-1.4	6.38979	1.84275	1.38963	2.01478	1.62553	1.31121	2.05768	1.7537	1.78172	1.73541	2.32969
	-1.4	6.40003	1.77119	1.29353	1.97103	1.54044	1.22273	2.00623	1.72956	1.76862	1.58909	2.31019
	-1.4	6.41027	1.79324	1.17042	1.92885	1.39679	1.25115	1.84375	1.72981	1.6711	1.5065	2.21885
	-1.4	6.42051	1.74166	1.10976	1.79164	1.47004	1.12973	1.73794	1.70014	1.61501	1.5768	2.2122
	-1.4	6.43075	1.76193	1.08081	1.68424	1.3954	1.13385	1.69682	1.58813	1.52067	1.5648	2.10913
	-1.4	6.44099	1.61983	1.05319	1.74596	1.52618	0.981827	1.61408	1.46954	1.56833	1.42469	2.08492
	-1.4	6.45123	1.52911	1.03151	1.71597	1.44491	0.824596	1.5191	1.39606	1.63555	1.36882	2.06594
	-1.4	6.46147	1.54206	1.01556	1.71361	1.24988	0.84465	1.47504	1.32059	1.5141	1.35028	1.99069
	-1.4	6.47171	1.51007	1.0074	1.6119	1.23201	0.737877	1.54032	1.32384	1.27342	1.2339	1.83604
	-1.4	6.48195	1.47803	0.829781	1.45101	1.16454	0.813271	1.48086	1.27279	1.24893	1.28115	1.73232
	-1.4	6.49219	1.30576	0.781437	1.42888	1.18577	0.793381	1.30847	1.22604	1.18845	1.2634	1.6887
	-1.4	6.50243	1.33761	0.697849	1.35889	1.09131	0.812344	1.24862	1.14616	1.0996	1.23288	1.71973
	-1.4	6.51267	1.27374	0.613415	1.26624	0.991371	0.750656	1.20942	1.14576	1.03639	1.1388	1.7654
	-1.4	6.52291	1.26173	0.590385	1.28698	0.911957	0.763435	1.25092	1.03209	0.982738	1.10935	1.70774
	-1.4	6.53315	1.18555	0.580513	1.30501	0.862221	0.742882	1.26677	0.98959	1.02984	1.05775	1.54105
	-1.4	6.54339	1.20115	0.536621	1.28574	0.902657	0.520462	1.23573	0.971558	1.08569	0.952538	1.56006
	-1.4	6.55363	1.15981	0.549232	1.22358	0.897198	0.508049	1.11536	0.870667	1.05141	0.917545	1.50735
	-1.4	6.56387	1.08951	0.491592	1.17354	0.818207	0.595562	1.06039	0.85815	0.878178	0.880447	1.35706
	-1.4	6.57411	1.00915	0.490009	1.06713	0.687962	0.566559	1.06278	0.816631	0.885834	0.882679	1.34004
	-1.4	6.58435	1.03113	0.377796	1.01784	0.740879	0.441425	0.975357	0.822163	0.850536	0.856956	1.32827
	-1.4	6.59459	0.917095	0.343082	1.03305	0.690361	0.407425	1.06622	0.781261	0.801304	0.793903	1.17405
	-1.4	6.60483	0.861832	0.310631	0.951485	0.623302	0.3339	0.949272	0.748566	0.688969	0.699432	1.1431
	-1.4	6.61507	0.827663	0.194763	0.874847	0.661201	0.381165	0.936447	0.659847	0.736225	0.58786	1.10913
	-1.4	6.62531	0.837597	0.102436	0.760727	0.669735	0.325768	0.867172	0.642063	0.658714	0.624435	1.14513
	-1.4	6.63555	0.834198	0.0392151	0.648205	0.573009	0.240891	0.770599	0.611244	0.647667	0.635296	1.16443
	-1.4	6.64579	0.900085	0.0970573	0.652267	0.462296	0.149826	0.773258	0.509464	0.601948	0.532848	1.08307
	-1.4	6.65603	0.757881	0.142513	0.6483	0.490326	0.0861893	0.758896	0.514294	0.496471	0.587662	0.940956
	-1.4	6.66627	0.694405	0.0358925	0.636597	0.443714	0.121231	0.592121	0.520622	0.457645	0.594788	0.953499
	-1.4	6.67651	0.654453	-0.137413	0.623577	0.497871	0.0489502	0.608665	0.426804	0.415802	0.450714	0.879868
	-1.4	6.68675	0.629074	-0.130989	0.671047	0.42482	0.0986595	0.637947	0.373089	0.344898	0.421707	0.863831
	-1.4	6.69699	0.508293	-0.0795403	0.699371	0.447681	0.0710678	0.454445	0.367737	0.297272	0.37207	0.853935
	-1.4	6.70723	0.45546	-0.107586	0.589054	0.369862	-0.0440178	0.318916	0.308907	0.498138	0.411446	0.794487
	-1.4	6.71747	0.491016	-0.0975266	0.540783	0.233025	-0.15728	0.317917	0.271019	0.455463	0.39304	0.718895
	-1.4	6.72771	0.384102	-0.171593	0.488857	0.131683	-0.226089	0.344093	0.317558	0.18996	0.398621	0.709682
	-1.4	6.73795	0.423012	-0.204136	0.412468	0.210423	-0.185917	0.386078	0.268173	0.108601	0.391235	0.624409
	-1.4	6.74819	0.397739	-0.186852	0.327065	0.199989	-0.157543	0.281876	0.211655	0.11554	0.367027	0.574211
	-1.4	6.75843	0.373634	-0.202881	0.328583	0.112705	-0.195988	0.286716	0.272514	0.126278	0.316017	0.547638
	-1.4	6.76867	0.307304	-0.198391	0.344135	0.122185	-0.262997	0.193687	0.11898	0.112686	0.302879	0.542156
	-1.4	6.77891	0.234089	-0.273361	0.31628	0.112385	-0.200603	0.154919	0.043663	-0.0391006	0.233189	0.489799
	-1.4	6.78915	0.257011	-0.322952	0.272469	0.0902214	-0.275894	0.123924	0.0847359	-0.128506	0.199203	0.403412
	-1.4	6.79939	0.275513	-0.385059	0.137878	0.0310936	-0.311584	0.0762329	0.0385513	-0.0573616	0.169556	0.384705
	-1.4	6.80963	0.221653	-0.343933	0.109295	-0.0446625	-0.388763	0.0319443	-0.0343208	-0.0984077	0.147682	0.321323
	-1.4	6.81987	0.193542	-0.446499	0.173492	-0.135155	-0.348099	0.0152664	-0.127327	-0.138329	0.137764	0.331367
	-1.4	6.83011	0.127594	-0.425507	0.210205	-0.147865	-0.354527	0.0290833	-0.241993	-0.23576	0.127857	0.310318
	-1.4	6.84035	0.22332	-0.426987	0.183754	-0.186485	-0.458344	0.0338402	-0.259224	-0.181602	-0.0621033	0.250568
	-1.4	6.85059	0.209648	-0.494041	0.11937	-0.229553	-0.355812	0.0417328	-0.198959	-0.198864	-0.0791626	0.227062
	-1.4	6.86083	0.221355	-0.463715	0.0386162	-0.281387	-0.41003	-0.0715561	-0.119972	-0.203907	0.0103302	0.138123
	-1.4	6.87107	0.204868	-0.484669	-0.109337	-0.20282	-0.533852	-0.132328	-0.233688	-0.260246	-0.046833	0.0808525
	-1.4	6.88131	0.157066	-0.557449	-0.135967	-0.153679	-0.621365	-0.0919266	-0.414909	-0.273407	-0.125305	0.163513
	-1.4	6.89155	0.0847054	-0.569679	-0.150272	-0.283199	-0.637775	-0.182468	-0.40361	-0.263092	-0.145538	0.137501
	-1.4	6.90179	0.0854111	-0.58688	-0.136017	-0.377842	-0.590759	-0.266846	-0.3381	-0.303741	-0.197975	0.0335846
	-1.4	6.91203	0.0124893	-0.581444	-0.0859337	-0.496979	-0.598366	-0.215736	-0.365555	-0.350319	-0.218147	0.0289993
	-1.4	6.92227	-0.0525284	-0.671127	-0.179821	-0.461632	-0.607044	-0.203384	-0.460793	-0.347939	-0.128063	-0.0405502
	-1.4	6.93251	-0.0507889	-0.703777	-0.264618	-0.525471	-0.553082	-0.246578	-0.488041	-0.437035	-0.179276	-0.128277
	-1.4	6.94275	-0.0422401	-0.700153	-0.343521	-0.489288	-0.612614	-0.369507	-0.508976	-0.510204	-0.153629	-0.156124
	-1.4	6.95299	-0.0746384	-0.581028	-0.321896	-0.520996	-0.592026	-0.358883	-0.564682	-0.525059	-0.237854	-0.180237
	-1.4	6.96323	-0.116268	-0.696625	-0.337059	-0.520714	-0.654751	-0.361519	-0.569977	-0.518646	-0.25185	-0.210899
	-1.4	6.97347	-0.130573	-0.758389	-0.346001	-0.472374	-0.735027	-0.319378	-0.510635	-0.425957	-0.220329	-0.21283
	-1.4	6.98371	-0.161247	-0.751366	-0.348064	-0.625511	-0.696808	-0.298149	-0.543228	-0.516342	-0.287956	-0.21891
	-1.4	6.99395	-0.0719681	-0.851952	-0.339848	-0.669094	-0.735004	-0.405983	-0.450863	-0.544357	-0.268826	-0.223408
	-1.4	7.00419	-0.0525856	-0.860561	-0.370533	-0.723152	-0.703579	-0.39957	-0.474205	-0.545609	-0.356117	-0.224052
	-1.4	7.01443	-0.132812	-0.886894	-0.36795	-0.706844	-0.746494	-0.424152	-0.596786	-0.604271	-0.3797	-0.215572
	-1.4	7.02467	-0.294392	-0.918438	-0.321632	-0.703819	-0.779984	-0.602703	-0.600361	-0.642082	-0.278252	-0.270744
	-1.4	7.03491	-0.320927	-0.946487	-0.423271	-0.761051	-0.764019	-0.641899	-0.635696	-0.659859	-0.375454	-0.331196
	-1.4	7.04515	-0.258343	-1.00316	-0.413918	-0.76413	-0.849911	-0.565464	-0.71175	-0.744068	-0.516304	-0.239643
	-1.4	7.05539	-0.320107	-1.00925	-0.450371	-0.751419	-0.948521	-0.584164	-0.765274	-0.733921	-0.573952	-0.264732
	-1.4	7.06563	-0.35762	-1.08638	-0.447701	-0.817604	-0.912998	-0.589615	-0.769592	-0.834415	-0.551147	-0.355213
	-1.4	7.07587	-0.370533	-1.10748	-0.401814	-0.860172	-0.950573	-0.598316	-0.776184	-0.792351	-0.647053	-0.39925
	-1.4	7.08611	-0.383369	-1.06543	-0.392792	-0.822495	-1.03693	-0.671829	-0.770042	-0.911209	-0.7145	-0.41972
	-1.4	7.09635	-0.423412	-1.17157	-0.538239	-0.797062	-1.06123	-0.70961	-0.760998	-0.932205	-0.703796	-0.396118
	-1.4	7.10659	-0.458805	-1.10679	-0.643154	-0.826172	-1.06978	-0.670616	-0.77187	-0.886295	-0.667938	-0.439129
	-1.4	7.11683	-0.518353	-1.12229	-0.630074	-0.955658	-1.07417	-0.804096	-0.879517	-0.793015	-0.713474	-0.538143
	-1.4	7.12707	-0.586811	-1.12363	-0.635986	-1.00073	-1.1046	-0.804321	-0.903198	-0.889626	-0.630371	-0.602421
	-1.4	7.13731	-0.567497	-1.16982	-0.607712	-1.0128	-1.09406	-0.748283	-0.979328	-1.01891	-0.632198	-0.690311
	-1.4	7.14755	-0.532349	-1.20198	-0.63129	-1.06712	-1.03996	-0.745922	-0.98497	-1.07701	-0.662201	-0.64325
	-1.4	7.15779	-0.514801	-1.22359	-0.68	-1.00121	-1.07872	-0.767235	-1.04386	-1.0869	-0.64798	-0.559063
	-1.4	7.16803	-0.480301	-1.25506	-0.662563	-1.07727	-1.07967	-0.801067	-1.09312	-0.972485	-0.812546	-0.622337
	-1.4	7.17827	-0.500969	-1.16206	-0.64003	-1.11006	-1.13573	-0.825481	-1.03198	-1.05888	-0.90855	-0.623627
	-1.4	7.18851	-0.56036	-1.21684	-0.727184	-1.04404	-1.18108	-0.800148	-1.10252	-1.09593	-0.898499	-0.616879
	-1.4	7.19875	-0.63382	-1.34164	-0.75391	-1.12725	-1.22805	-0.811417	-1.01916	-1.08663	-0.938217	-0.729568
	-1.4	7.20899	-0.532249	-1.3306	-0.765877	-1.14415	-1.27067	-0.889164	-0.966835	-1.12288	-0.94846	-0.705776
	-1.4	7.21923	-0.47683	-1.34304	-0.75898	-1.11535	-1.32428	-0.796547	-0.969948	-1.15614	-0.885017	-0.690731
	-1.4	7.22948	-0.534954	-1.4272	-0.805687	-1.15233	-1.35961	-0.890652	-1.08298	-1.15253	-0.913269	-0.728138
	-1.4	7.23972	-0.635399	-1.35896	-0.822838	-1.1898	-1.39309	-0.936142	-1.11115	-1.21175	-1.01453	-0.743923
	-1.4	7.24996	-0.709633	-1.35963	-0.87075	-1.21045	-1.34711	-0.953873	-1.1908	-1.14645	-1.01672	-0.722824
	-1.4	7.26019	-0.727169	-1.30266	-0.865776	-1.18135	-1.24918	-0.854378	-1.17681	-1.25136	-1.08331	-0.770061
	-1.4	7.27043	-0.606422	-1.34016	-0.884815	-1.23381	-1.3051	-0.745071	-1.16946	-1.2483	-1.03663	-0.836884
	-1.4	7.28067	-0.598602	-1.34294	-0.925896	-1.13451	-1.30059	-0.837044	-1.1744	-1.22332	-1.15668	-0.832878
	-1.4	7.29092	-0.661808	-1.39941	-0.86232	-1.10559	-1.3968	-0.885811	-1.28806	-1.29942	-1.13942	-0.780113
	-1.4	7.30116	-0.711433	-1.49014	-0.857922	-1.19028	-1.39716	-0.969688	-1.25374	-1.30329	-1.13252	-0.760063
	-1.4	7.3114	-0.748211	-1.44967	-0.866371	-1.23541	-1.37379	-0.962036	-1.25387	-1.29709	-1.13362	-0.806683
	-1.4	7.32164	-0.745087	-1.45549	-0.929733	-1.29357	-1.36061	-1.04436	-1.28836	-1.27583	-1.1535	-0.839481
	-1.4	7.33188	-0.746826	-1.34001	-0.941689	-1.30499	-1.38406	-0.945179	-1.19836	-1.27229	-1.06277	-0.813477
	-1.4	7.34212	-0.767986	-1.38882	-1.01609	-1.27397	-1.35017	-0.890068	-1.17955	-1.18975	-1.1124	-0.828991
	-1.4	7.35236	-0.78923	-1.45505	-1.00336	-1.27615	-1.38591	-0.902493	-1.23842	-1.29845	-1.19962	-0.954826
	-1.4	7.3626	-0.73513	-1.42861	-1.02327	-1.40312	-1.42653	-0.94072	-1.20468	-1.35393	-1.16251	-0.966011
	-1.4	7.37284	-0.666084	-1.45541	-1.01503	-1.50529	-1.50864	-0.969513	-1.28952	-1.41299	-1.09543	-0.989159
	-1.4	7.38308	-0.673073	-1.33617	-0.96162	-1.3773	-1.45118	-1.01949	-1.31494	-1.40792	-1.00724	-0.976501
	-1.4	7.39332	-0.819904	-1.38773	-0.964577	-1.34167	-1.38229	-1.04924	-1.46908	-1.42235	-1.20359	-0.939068
	-1.4	7.40356	-0.871819	-1.43744	-0.959702	-1.36276	-1.45273	-1.12685	-1.52129	-1.36708	-1.1341	-0.917572
	-1.4	7.4138	-0.878029	-1.38679	-1.03617	-1.36294	-1.47969	-1.04633	-1.32517	-1.4204	-1.12458	-1.04184
	-1.4	7.42404	-0.936108	-1.34786	-1.0191	-1.38201	-1.40769	-1.05523	-1.37617	-1.42617	-1.19275	-0.982468
	-1.4	7.43428	-0.954407	-1.47765	-1.02973	-1.3756	-1.3931	-1.06326	-1.39003	-1.46935	-1.24906	-1.00002
	-1.4	7.44452	-0.913231	-1.45758	-0.998791	-1.50171	-1.39138	-1.0649	-1.38419	-1.49314	-1.20889	-1.10381
	-1.4	7.45476	-1.01201	-1.4216	-1.0127	-1.51067	-1.40117	-0.991158	-1.47332	-1.50155	-1.1952	-1.09266
	-1.4	7.465	-0.944725	-1.40775	-1.005	-1.48773	-1.47483	-1.02189	-1.51739	-1.49659	-1.22183	-1.00986
	-1.4	7.47524	-1.01644	-1.39972	-1.04781	-1.50654	-1.45309	-1.09207	-1.40464	-1.50935	-1.17881	-1.03027
	-1.4	7.48548	-1.08459	-1.41746	-1.05674	-1.46248	-1.40076	-1.04194	-1.41591	-1.47638	-1.15711	-1.08525
	-1.4	7.49572	-1.05268	-1.48578	-1.04092	-1.5392	-1.44477	-1.06199	-1.32525	-1.47954	-1.20564	-1.1058
	-1.4	7.50596	-1.07981	-1.5725	-1.02675	-1.52526	-1.36863	-1.1198	-1.3354	-1.52101	-1.33704	-1.08193
	-1.4	7.5162	-1.02569	-1.58593	-1.04844	-1.54383	-1.32353	-1.05828	-1.41722	-1.59515	-1.2878	-1.11057
	-1.4	7.52644	-1.12804	-1.60152	-1.06492	-1.59442	-1.442	-1.00661	-1.40544	-1.53052	-1.28401	-1.10656
	-1.4	7.53668	-1.06422	-1.5721	-0.995571	-1.56669	-1.40832	-1.04732	-1.41804	-1.47474	-1.30271	-1.13359
	-1.4	7.54692	-1.0006	-1.45362	-1.00599	-1.56843	-1.39331	-1.1496	-1.39715	-1.41982	-1.30252	-1.09183
	-1.4	7.55716	-1.02516	-1.40002	-1.10839	-1.50083	-1.41037	-1.15173	-1.3998	-1.35076	-1.32855	-1.08588
	-1.4	7.5674	-1.07501	-1.39355	-1.17065	-1.49643	-1.40577	-1.1527	-1.41858	-1.45341	-1.39069	-1.11076
	-1.4	7.57764	-1.05615	-1.49814	-1.07705	-1.58655	-1.35001	-1.16097	-1.34525	-1.49724	-1.46672	-1.02531
	-1.4	7.58788	-0.899868	-1.51678	-0.973507	-1.57395	-1.45013	-1.13517	-1.38794	-1.4349	-1.45678	-1.0529
	-1.4	7.59812	-1.00475	-1.5031	-0.932961	-1.67982	-1.46542	-1.10708	-1.38633	-1.55473	-1.40217	-1.14113
	-1.4	7.60836	-1.02396	-1.50683	-0.926167	-1.71068	-1.56379	-1.18266	-1.42794	-1.5422	-1.28947	-1.12532
	-1.4	7.6186	-0.922386	-1.52998	-0.933846	-1.69471	-1.54988	-1.21308	-1.49194	-1.5041	-1.33453	-1.19271
	-1.4	7.62884	-0.995785	-1.54873	-1.03727	-1.66407	-1.52176	-1.18471	-1.40771	-1.42796	-1.33563	-1.22356
	-1.4	7.63908	-1.02159	-1.57861	-1.07145	-1.65191	-1.49809	-1.2662	-1.53782	-1.48763	-1.41274	-1.1015
	-1.4	7.64932	-0.890961	-1.57954	-1.06155	-1.6659	-1.54726	-1.22512	-1.54239	-1.51298	-1.39371	-1.13253
	-1.4	7.65956	-0.924782	-1.56181	-0.996349	-1.71749	-1.51198	-1.18419	-1.43131	-1.48206	-1.27603	-1.26564
	-1.4	7.6698	-1.11666	-1.64283	-0.950073	-1.69277	-1.47948	-1.16327	-1.38592	-1.47057	-1.29162	-1.28091
	-1.4	7.68004	-1.03122	-1.58485	-0.877625	-1.69901	-1.58233	-1.27832	-1.43995	-1.53834	-1.33074	-1.22444
	-1.4	7.69028	-0.987022	-1.60388	-0.862701	-1.65078	-1.63124	-1.23092	-1.42	-1.55411	-1.40124	-1.20421
	-1.4	7.70052	-1.05096	-1.63136	-0.898811	-1.72375	-1.61613	-1.18015	-1.41454	-1.55413	-1.34615	-1.26711
	-1.4	7.71076	-1.0073	-1.62829	-0.904854	-1.7091	-1.65321	-1.15662	-1.40372	-1.52129	-1.3746	-1.23661
	-1.4	7.721	-1.0762	-1.67554	-0.972874	-1.6584	-1.50152	-1.30922	-1.46438	-1.5155	-1.40349	-1.22582
	-1.4	7.73124	-1.13248	-1.58372	-1.02239	-1.71288	-1.4396	-1.18026	-1.49138	-1.59935	-1.40179	-1.20476
	-1.4	7.74148	-1.06962	-1.55843	-0.999855	-1.69209	-1.45975	-1.13664	-1.38937	-1.57303	-1.39417	-1.15391
	-1.4	7.75172	-1.05344	-1.51643	-0.987694	-1.62351	-1.49026	-1.1803	-1.37842	-1.62153	-1.39657	-1.07347
	-1.4	7.76196	-1.04815	-1.51378	-1.00507	-1.66452	-1.5017	-1.26733	-1.37575	-1.72304	-1.37851	-1.04552
	-1.4	7.7722	-1.03742	-1.49146	-0.99189	-1.6797	-1.58101	-1.36968	-1.38175	-1.68633	-1.3672	-1.15929
	-1.4	7.78244	-0.964886	-1.44406	-0.994377	-1.60119	-1.58474	-1.38248	-1.33277	-1.64975	-1.36045	-1.16375
	-1.4	7.79268	-0.959888	-1.51616	-0.936886	-1.5774	-1.60603	-1.21431	-1.31885	-1.56956	-1.32073	-1.20302
	-1.4	7.80292	-1.04287	-1.54303	-0.893757	-1.65766	-1.5599	-1.2347	-1.40767	-1.53327	-1.3306	-1.2006
	-1.4	7.81316	-1.14059	-1.51344	-0.8452	-1.70753	-1.58839	-1.26018	-1.37342	-1.62426	-1.32822	-1.19695
	-1.4	7.8234	-1.08494	-1.57853	-0.832516	-1.79332	-1.59743	-1.17566	-1.27794	-1.7276	-1.37761	-1.1526
	-1.4	7.83364	-1.06195	-1.4725	-0.880104	-1.67295	-1.61451	-1.14735	-1.3299	-1.64525	-1.38112	-1.13963
	-1.4	7.84388	-1.09919	-1.53302	-0.919052	-1.6597	-1.52006	-1.12415	-1.31446	-1.61687	-1.32316	-1.15885
	-1.4	7.85412	-1.12552	-1.56547	-0.961239	-1.72639	-1.42828	-1.14046	-1.32256	-1.61097	-1.32237	-1.18589
	-1.4	7.86436	-1.19104	-1.59625	-0.932213	-1.72575	-1.42811	-1.20533	-1.27429	-1.57653	-1.30357	-1.19357
	-1.4	7.8746	-1.18999	-1.65066	-0.907013	-1.69704	-1.46044	-1.21809	-1.27765	-1.57087	-1.28609	-1.15578
	-1.4	7.88484	-1.08134	-1.61588	-0.882694	-1.77423	-1.53676	-1.25694	-1.25304	-1.50702	-1.33453	-1.23455
	-1.4	7.89508	-1.21594	-1.69807	-0.968357	-1.81851	-1.50513	-1.21225	-1.33075	-1.58367	-1.31757	-1.25558
	-1.4	7.90532	-1.10982	-1.61964	-0.944946	-1.86208	-1.50006	-1.26208	-1.31133	-1.60603	-1.33256	-1.23498
	-1.4	7.91556	-0.710144	-1.57803	-0.948318	-1.7365	-1.52976	-1.29245	-1.24794	-1.54407	-1.4278	-1.1447
	-1.4	7.9258	-0.85186	-1.63902	-0.954651	-1.7767	-1.56873	-1.23891	-1.30123	-1.57962	-1.34766	-1.20089
	-1.4	7.93604	-0.983871	-1.63242	-0.889641	-1.86628	-1.49172	-1.29216	-1.27051	-1.67853	-1.36668	-1.10587
	-1.4	7.94628	-1.0836	-1.57144	-0.775333	-1.86792	-1.46917	-1.33714	-1.25352	-1.6106	-1.44979	-1.01525
	-1.4	7.95652	-1.13377	-1.60416	-0.834877	-1.86692	-1.55165	-1.28621	-1.21826	-1.52835	-1.41187	-1.11636
	-1.4	7.96676	-1.18755	-1.51635	-0.785683	-1.92732	-1.57243	-1.27352	-1.26571	-1.53493	-1.3729	-1.09068
	-1.4	7.977	-1.20422	-1.51463	-0.712082	-1.89295	-1.58615	-1.32123	-1.25265	-1.54229	-1.29233	-1.15191
	-1.4	7.98724	-1.16175	-1.54295	-0.794456	-1.83282	-1.63046	-1.24741	-1.18103	-1.48107	-1.32057	-1.10928
	-1.4	7.99748	-1.14999	-1.56632	-0.842758	-1.77283	-1.61938	-1.30714	-1.09093	-1.60046	-1.28687	-1.25527
	-1.4	8.00772	-1.13831	-1.52959	-0.814552	-1.78098	-1.49364	-1.31196	-1.13272	-1.59604	-1.30452	-1.22538
	-1.4	8.01796	-1.14249	-1.57321	-0.839859	-1.82441	-1.5183	-1.34527	-1.11809	-1.62283	-1.33298	-1.22215
	-1.4	8.0282	-1.08889	-1.53455	-0.780701	-1.88201	-1.53909	-1.23352	-1.08062	-1.59779	-1.42512	-1.13972
	-1.4	8.03844	-1.08945	-1.42844	-0.747543	-1.86176	-1.57974	-1.21233	-1.08558	-1.55267	-1.37286	-1.20753
	-1.4	8.04868	-1.00738	-1.52334	-0.740883	-1.83337	-1.42458	-1.16129	-1.1616	-1.54719	-1.37143	-1.16181
	-1.4	8.05892	-1.01227	-1.57922	-0.716003	-1.82052	-1.42274	-1.17735	-1.17357	-1.55654	-1.31303	-1.1402
	-1.4	8.06916	-1.08352	-1.44695	-0.713894	-1.85692	-1.46878	-1.13699	-1.12435	-1.4884	-1.32343	-1.1167
	-1.4	8.0794	-1.03482	-1.37024	-0.751469	-1.85446	-1.41801	-1.17555	-1.05715	-1.52967	-1.33704	-1.01958
	-1.4	8.08964	-1.00929	-1.42055	-0.717911	-1.76361	-1.44777	-1.21387	-1.03973	-1.56643	-1.30459	-1.00352
	-1.4	8.09988	-1.05785	-1.50864	-0.69022	-1.73693	-1.46397	-1.24062	-1.11949	-1.57998	-1.2829	-1.08442
	-1.4	8.11012	-1.08729	-1.50151	-0.605797	-1.74955	-1.46095	-1.26408	-1.00851	-1.60999	-1.34045	-1.11439
	-1.4	8.12036	-1.056	-1.5565	-0.61948	-1.85275	-1.49003	-1.21578	-1.0536	-1.60352	-1.36687	-1.13213
	-1.4	8.1306	-1.09765	-1.49963	-0.669392	-1.76871	-1.54863	-1.2407	-1.03735	-1.48916	-1.35911	-1.10932
	-1.4	8.14084	-1.12435	-1.44929	-0.654778	-1.77795	-1.57722	-1.23132	-0.978447	-1.58166	-1.24152	-1.01645
	-1.4	8.15108	-1.08252	-1.44017	-0.658638	-1.8341	-1.47571	-1.19746	-1.08866	-1.55396	-1.25386	-0.980751
	-1.4	8.16132	-1.06235	-1.44065	-0.650497	-1.76806	-1.52066	-1.24844	-1.01523	-1.51031	-1.31661	-1.01425
	-1.4	8.17156	-1.02659	-1.42188	-0.612041	-1.68634	-1.50342	-1.21359	-1.01297	-1.521	-1.22941	-1.1077
	-1.4	8.1818	-1.03112	-1.44668	-0.582893	-1.67169	-1.44217	-1.18869	-1.02168	-1.54573	-1.25247	-1.08511
	-1.4	8.19204	-1.07905	-1.46047	-0.637703	-1.73146	-1.51152	-1.17772	-1.03089	-1.65107	-1.40313	-0.941689
	-1.4	8.20228	-1.03336	-1.4829	-0.714729	-1.75156	-1.48416	-1.22079	-0.975815	-1.54802	-1.42804	-0.907104
	-1.4	8.21252	-0.897018	-1.51721	-0.647934	-1.74751	-1.58336	-1.18282	-0.924278	-1.47421	-1.39805	-1.01196
	-1.4	8.22276	-1.05346	-1.49298	-0.657722	-1.79491	-1.49371	-1.11341	-0.916447	-1.51582	-1.41879	-1.04453
	-1.4	8.233	-1.02707	-1.4509	-0.724678	-1.7127	-1.45016	-1.13646	-1.01389	-1.51677	-1.38586	-1.02333
	-1.4	8.24324	-0.952831	-1.43581	-0.551506	-1.78071	-1.42057	-1.14934	-0.967503	-1.57582	-1.31975	-1.02158
	-1.4	8.25348	-1.02773	-1.42205	-0.533409	-1.7589	-1.3655	-1.18609	-0.912823	-1.44376	-1.37485	-1.06239
	-1.4	8.26372	-1.03582	-1.33102	-0.601894	-1.75094	-1.36385	-1.23893	-0.853981	-1.39889	-1.34861	-1.03346
	-1.4	8.27396	-1.01774	-1.35015	-0.668343	-1.74741	-1.37009	-1.21854	-0.907803	-1.38007	-1.2616	-1.00258
	-1.4	8.2842	-1.04071	-1.43494	-0.624893	-1.75889	-1.33334	-1.20424	-0.887821	-1.51753	-1.30039	-1.0378
	-1.4	8.29444	-1.04176	-1.39304	-0.58567	-1.66268	-1.35495	-1.13891	-0.846695	-1.49462	-1.34102	-0.981323
	-1.4	8.30468	-1.03759	-1.35896	-0.560139	-1.59936	-1.3466	-1.13401	-0.853218	-1.47028	-1.31065	-0.977192
	-1.4	8.31492	-1.03667	-1.38596	-0.534969	-1.61238	-1.47445	-1.08277	-0.850525	-1.52887	-1.30281	-0.986023
	-1.4	8.32516	-0.977795	-1.30886	-0.510033	-1.58132	-1.52986	-1.15102	-0.839794	-1.54068	-1.32365	-0.99395
	-1.4	8.3354	-0.943508	-1.27778	-0.560696	-1.56496	-1.46105	-1.11391	-0.878048	-1.47733	-1.33538	-1.00741
	-1.4	8.34564	-0.963242	-1.27267	-0.610954	-1.6576	-1.41685	-1.18282	-0.84647	-1.3786	-1.3617	-0.951786
	-1.4	8.35588	-0.98167	-1.18073	-0.589115	-1.59765	-1.39854	-1.24451	-0.822746	-1.48015	-1.3569	-1.04911
	-1.4	8.36612	-1.03106	-1.24383	-0.587555	-1.63251	-1.39218	-1.11325	-0.9408	-1.4678	-1.3424	-1.08004
	-1.4	8.37636	-1.01762	-1.34636	-0.702171	-1.59254	-1.30042	-1.12606	-0.846672	-1.56416	-1.3989	-1.00978
	-1.4	8.3866	-1.05644	-1.29237	-0.607368	-1.55925	-1.26517	-1.11772	-0.816574	-1.46892	-1.29387	-1.05589
	-1.4	8.39684	-0.994881	-1.32587	-0.561138	-1.5774	-1.38193	-1.07749	-0.835217	-1.48574	-1.17417	-1.05082
	-1.4	8.40708	-0.976234	-1.32384	-0.573738	-1.54748	-1.37081	-1.04633	-0.768387	-1.44347	-1.23078	-1.03506
	-1.4	8.41732	-0.967041	-1.25194	-0.527046	-1.59027	-1.31751	-1.12268	-0.775253	-1.35569	-1.17503	-0.98595
	-1.4	8.42756	-0.953094	-1.34917	-0.548561	-1.52442	-1.3203	-1.0731	-0.778404	-1.378	-1.2102	-1.05712
	-1.4	8.4378	-0.967796	-1.37759	-0.660225	-1.43783	-1.37799	-1.05482	-0.732555	-1.39238	-1.3015	-1.12886
	-1.4	8.44804	-0.972183	-1.38741	-0.573452	-1.49789	-1.37315	-1.09296	-0.697517	-1.44951	-1.28543	-1.07412
	-1.4	8.45828	-0.923828	-1.42548	-0.582321	-1.50602	-1.31795	-1.07003	-0.724495	-1.40396	-1.22537	-0.986664
	-1.4	8.46852	-0.953835	-1.24505	-0.588531	-1.44241	-1.3023	-1.0811	-0.703476	-1.40679	-1.24419	-0.878963
	-1.4	8.47876	-0.918549	-1.24639	-0.541359	-1.49794	-1.35608	-1.03976	-0.803318	-1.3905	-1.23166	-0.866898
	-1.4	8.489	-0.906506	-1.23536	-0.557858	-1.45544	-1.3473	-1.00461	-0.782501	-1.47454	-1.15487	-0.900253
	-1.4	8.49924	-0.966007	-1.10038	-0.550243	-1.47229	-1.29523	-1.03119	-0.7215	-1.48172	-1.26487	-0.904484
	-1.4	8.50948	-0.908009	-1.20919	-0.435852	-1.46688	-1.28686	-1.031	-0.723648	-1.4203	-1.2549	-0.903862
	-1.4	8.51972	-0.876678	-1.23277	-0.419186	-1.38156	-1.25309	-1.08048	-0.742126	-1.37407	-1.24835	-0.962097
	-1.4	8.52996	-0.968018	-1.26498	-0.511406	-1.3141	-1.38419	-0.982674	-0.705837	-1.41259	-1.17744	-0.979004
	-1.4	8.5402	-0.919212	-1.17412	-0.542973	-1.31802	-1.42918	-0.961761	-0.74675	-1.32758	-1.19509	-0.992817
	-1.4	8.55044	-0.888542	-1.05053	-0.56834	-1.26846	-1.312	-0.941498	-0.763718	-1.34848	-1.2309	-1.01765
	-1.4	8.56068	-0.969116	-1.13793	-0.466904	-1.23734	-1.34712	-0.945789	-0.751915	-1.36353	-1.14874	-0.933903
	-1.4	8.57092	-0.940208	-1.11666	-0.514847	-1.28531	-1.39677	-1.0546	-0.733734	-1.43074	-1.12304	-1.0286
	-1.4	8.58116	-0.912445	-1.17705	-0.455257	-1.24483	-1.35558	-0.973862	-0.670731	-1.52316	-1.11247	-0.959404
	-1.4	8.5914	-0.765305	-1.16017	-0.459763	-1.28842	-1.29126	-0.933533	-0.609825	-1.40374	-1.06652	-0.865547
	-1.4	8.60164	-0.815041	-1.1992	-0.430092	-1.25014	-1.25358	-0.867851	-0.631847	-1.3716	-1.08829	-0.860317
	-1.4	8.61188	-0.946934	-1.1611	-0.400978	-1.32447	-1.21231	-0.876083	-0.679276	-1.4478	-1.21307	-0.816555
	-1.4	8.62212	-0.962677	-1.11769	-0.332924	-1.18328	-1.18847	-1.02533	-0.679577	-1.41036	-1.17186	-0.720654
	-1.4	8.63236	-0.863113	-1.0484	-0.299667	-1.25288	-1.12494	-1.00886	-0.700043	-1.36868	-1.06034	-0.757774
	-1.4	8.6426	-0.802856	-1.1765	-0.338657	-1.23622	-1.12779	-0.991779	-0.749886	-1.3194	-1.13712	-0.849541
	-1.4	8.65284	-0.776154	-1.14167	-0.307709	-1.23752	-1.23449	-0.911873	-0.644371	-1.27343	-1.10443	-0.818771
	-1.4	8.66308	-0.826626	-1.09628	-0.290771	-1.22976	-1.21453	-0.887329	-0.676933	-1.29288	-1.11118	-0.890987
	-1.4	8.67332	-0.798286	-1.13062	-0.346157	-1.12918	-1.23522	-1.05864	-0.820389	-1.3154	-1.1128	-0.862583
	-1.4	8.68356	-0.862804	-1.05603	-0.443916	-1.09108	-1.29607	-1.11545	-0.807308	-1.2429	-1.17082	-0.82819
	-1.4	8.6938	-0.873573	-1.08259	-0.473934	-1.22157	-1.23911	-0.963814	-0.753925	-1.29579	-1.0919	-0.820534
	-1.4	8.70404	-0.834503	-1.09686	-0.462944	-1.13601	-1.13526	-0.997238	-0.61581	-1.25749	-0.993198	-0.89167
	-1.4	8.71428	-0.858837	-1.08197	-0.444363	-1.07648	-1.14054	-1.07199	-0.678131	-1.21138	-1.05478	-0.86903
	-1.4	8.72452	-0.789894	-1.24772	-0.463303	-1.08724	-1.1724	-1.06226	-0.685524	-1.23787	-1.04645	-0.802288
	-1.4	8.73476	-0.805695	-1.47017	-0.430462	-1.16823	-1.13557	-1.04309	-0.675461	-1.27163	-1.0493	-0.781616
	-1.4	8.745	-0.862854	-1.21211	-0.442787	-1.19741	-1.18899	-0.978889	-0.648476	-1.26133	-1.08007	-0.713367
	-1.4	8.75524	-0.81884	-1.11285	-0.410553	-1.23901	-1.11485	-0.929005	-0.543163	-1.33187	-1.09032	-0.752872
	-1.4	8.76548	-0.810425	-1.1044	-0.388321	-1.17716	-1.06466	-0.878731	-0.673882	-1.35008	-1.02815	-0.773804
	-1.4	8.77572	-0.862724	-1.10108	-0.410301	-1.03516	-1.07495	-0.862511	-0.775955	-1.33192	-1.04284	-0.839554
	-1.4	8.78596	-0.801147	-1.16217	-0.411781	-1.00679	-1.12384	-0.872952	-0.763344	-1.35719	-1.03997	-0.873764
	-1.4	8.7962	-0.776688	-1.13355	-0.356251	-1.13527	-1.12903	-0.889854	-0.710049	-1.39018	-1.01958	-0.818764
	-1.4	8.80644	-0.706894	-1.06293	-0.424145	-1.18263	-1.03412	-0.825851	-0.68158	-1.29508	-1.01817	-0.80777
	-1.4	8.81668	-0.759537	-1.01722	-0.420067	-1.20775	-1.05276	-0.883682	-0.767014	-1.27515	-0.997749	-0.807533
	-1.4	8.82692	-0.754753	-0.947868	-0.36721	-1.09417	-1.0861	-0.908569	-0.70443	-1.27385	-1.03665	-0.748596
	-1.4	8.83716	-0.753719	-0.971916	-0.375481	-1.05459	-1.04826	-0.950851	-0.748695	-1.25089	-0.994427	-0.805969
	-1.4	8.8474	-0.742321	-0.929989	-0.331646	-1.05117	-0.994667	-0.884636	-0.698612	-1.24673	-0.958031	-0.793228
	-1.4	8.85764	-0.644665	-0.928223	-0.468704	-1.04301	-0.983116	-0.881844	-0.718212	-1.15645	-0.938267	-0.665649
	-1.4	8.86788	-0.620323	-0.887978	-0.410755	-1.07147	-0.915451	-0.906914	-0.720093	-1.12524	-0.869148	-0.704639
	-1.4	8.87812	-0.756828	-0.901711	-0.441929	-0.942139	-0.934597	-0.911633	-0.717964	-1.18893	-0.865761	-0.735516
	-1.4	8.88836	-0.749794	-0.855625	-0.43512	-0.986771	-0.975964	-0.766029	-0.752247	-1.1892	-0.870388	-0.788315
	-1.4	8.8986	-0.702457	-0.890472	-0.365265	-0.987122	-0.950928	-0.752441	-0.686741	-1.14074	-0.946777	-0.696297
	-1.4	8.90884	-0.734718	-0.853397	-0.445778	-1.03031	-0.947281	-0.880531	-0.720753	-1.1863	-0.982182	-0.706921
	-1.4	8.91908	-0.743324	-0.93837	-0.4338	-0.994083	-0.949532	-0.93816	-0.730179	-1.1947	-0.917824	-0.694817
	-1.4	8.92932	-0.816826	-0.927773	-0.37751	-1.02739	-1.06902	-0.909813	-0.750492	-1.20875	-0.938305	-0.756065
	-1.4	8.93956	-0.77644	-0.909103	-0.430283	-1.03553	-1.09977	-0.847809	-0.73222	-1.15819	-0.907715	-0.814289
	-1.4	8.9498	-0.765434	-0.86013	-0.442669	-0.976273	-1.03555	-0.867931	-0.682583	-1.17722	-0.890797	-0.778637
	-1.4	8.96004	-0.758892	-0.929836	-0.370174	-0.944382	-0.9533	-0.857296	-0.756573	-1.24202	-0.922386	-0.730247
	-1.4	8.97028	-0.774223	-0.941002	-0.314972	-0.845654	-0.987526	-0.791557	-0.731052	-1.24028	-0.925026	-0.777596
	-1.4	8.98052	-0.72065	-0.922646	-0.319382	-1.00224	-1.00778	-0.789013	-0.674034	-1.06177	-0.974163	-0.883778
	-1.4	8.99076	-0.686638	-0.950531	-0.258514	-1.00859	-0.987312	-0.73455	-0.657097	-1.08771	-0.921577	-0.843437
	-1.4	9.001	-0.681812	-0.96067	-0.354454	-1.0138	-0.994118	-0.782265	-0.614117	-1.09515	-0.949081	-0.72097
	-1.4	9.01124	-0.689259	-0.946739	-0.333389	-0.975662	-0.947029	-0.793282	-0.623718	-1.10171	-0.929539	-0.725075
	-1.4	9.02148	-0.604683	-0.868011	-0.382145	-0.991566	-0.906036	-0.701862	-0.70163	-1.1212	-0.988441	-0.830563
	-1.4	9.03172	-0.7034	-0.853195	-0.412796	-1.07551	-0.919456	-0.789028	-0.717712	-1.06015	-0.945526	-0.773319
	-1.4	9.04196	-0.653378	-0.833763	-0.33353	-0.985619	-0.904747	-0.813084	-0.64994	-1.10458	-0.881321	-0.753624
	-1.4	9.0522	-0.632206	-0.767998	-0.266582	-0.91489	-0.937721	-0.759094	-0.585449	-1.06604	-0.804241	-0.750202
	-1.4	9.06244	-0.772396	-0.876938	-0.312191	-0.961922	-0.883575	-0.670185	-0.575279	-1.05769	-0.816483	-0.627655
	-1.4	9.07268	-0.742226	-0.868683	-0.388702	-0.932411	-0.819904	-0.701633	-0.666496	-1.17857	-0.924675	-0.68322
	-1.4	9.08292	-0.637108	-0.84919	-0.34705	-0.923557	-0.776787	-0.82082	-0.650429	-1.1697	-0.939434	-0.723633
	-1.4	9.09316	-0.657646	-0.805939	-0.223156	-0.910767	-0.880344	-0.808865	-0.643826	-1.10077	-0.957695	-0.749287
	-1.4	9.1034	-0.639359	-0.86211	-0.178486	-0.847107	-0.930092	-0.751678	-0.724709	-1.07011	-0.866573	-0.678429
	-1.4	9.11364	-0.561768	-0.891281	-0.291473	-0.901321	-0.876614	-0.659122	-0.675716	-1.07952	-0.753326	-0.603806
	-1.4	9.12388	-0.541557	-0.80159	-0.30212	-0.838898	-0.86541	-0.683372	-0.643696	-1.11554	-0.825436	-0.732834
	-1.4	9.13412	-0.477226	-0.808479	-0.297386	-0.878689	-0.831745	-0.790722	-0.652763	-0.968933	-0.848873	-0.726955
	-1.4	9.14436	-0.595345	-0.833405	-0.274109	-0.893265	-0.811821	-0.824528	-0.710556	-1.02021	-0.889046	-0.646099
	-1.4	9.1546	-0.556713	-0.725224	-0.239655	-0.833519	-0.777931	-0.870815	-0.713326	-1.0484	-0.871212	-0.643547
	-1.4	9.16484	-0.518375	-0.726021	-0.266342	-0.851768	-0.743969	-0.929729	-0.689354	-1.06184	-0.744946	-0.738033
	-1.4	9.17508	-0.420124	-0.746502	-0.213127	-0.779541	-0.789387	-0.858624	-0.613129	-1.10993	-0.747673	-0.757034
	-1.4	9.18532	-0.45784	-0.744823	-0.152092	-0.798866	-0.828678	-0.672665	-0.66967	-1.19437	-0.767178	-0.658688
	-1.4	9.19556	-0.505199	-0.824463	-0.241085	-0.797943	-0.816795	-0.770321	-0.632645	-1.11996	-0.82156	-0.636826
	-1.4	9.2058	-0.470081	-0.813011	-0.220901	-0.805885	-0.820156	-0.69944	-0.646008	-1.01208	-0.778622	-0.627312
	-1.4	9.21604	-0.546829	-0.727692	-0.22747	-0.84837	-0.861355	-0.740089	-0.596046	-1.01392	-0.750858	-0.596603
	-1.4	9.22628	-0.551956	-0.785927	-0.274426	-0.850315	-0.829559	-0.748959	-0.566971	-1.04707	-0.703674	-0.565632
	-1.4	9.23652	-0.561539	-0.775768	-0.27697	-0.793964	-0.829918	-0.751835	-0.524464	-1.09448	-0.639458	-0.551041
	-1.4	9.24676	-0.587765	-0.802162	-0.303848	-0.712685	-0.817749	-0.665051	-0.52272	-1.12893	-0.752728	-0.55724
	-1.4	9.257	-0.639313	-0.721649	-0.210186	-0.707443	-0.805004	-0.64539	-0.535343	-1.00782	-0.74398	-0.570362
	-1.4	9.26724	-0.602642	-0.824623	-0.209671	-0.683899	-0.76556	-0.747433	-0.653564	-0.897537	-0.762924	-0.556343
	-1.4	9.27748	-0.526695	-0.772156	-0.251122	-0.761551	-0.764305	-0.671654	-0.591419	-0.833237	-0.772232	-0.580353
	-1.4	9.28772	-0.520523	-0.773346	-0.128933	-0.800686	-0.819893	-0.725895	-0.487602	-0.904533	-0.729973	-0.658958
	-1.4	9.29796	-0.511269	-0.748566	-0.138233	-0.868935	-0.739845	-0.660305	-0.47612	-0.964283	-0.731724	-0.674305
	-1.4	9.3082	-0.602108	-0.73732	-0.174114	-0.856346	-0.776051	-0.741177	-0.523342	-0.924744	-0.816528	-0.596352
	-1.4	9.31844	-0.585918	-0.866402	-0.294708	-0.802834	-0.792454	-0.717514	-0.504612	-0.928436	-0.837463	-0.630943
	-1.4	9.32868	-0.597301	-0.808109	-0.304398	-0.740429	-0.82856	-0.713818	-0.628994	-0.892296	-0.791828	-0.672897
	-1.4	9.33892	-0.582592	-0.764324	-0.326012	-0.679333	-0.785442	-0.644699	-0.587986	-1.00817	-0.721973	-0.703331
	-1.4	9.34916	-0.65271	-0.747215	-0.318512	-0.682957	-0.739239	-0.591103	-0.619522	-1.03508	-0.745625	-0.646801
	-1.4	9.3594	-0.654091	-0.799858	-0.249298	-0.629837	-0.692493	-0.647789	-0.677322	-0.973843	-0.758156	-0.638527
	-1.4	9.36964	-0.632729	-0.810539	-0.244209	-0.671867	-0.704906	-0.682026	-0.6716	-0.946987	-0.716766	-0.653206
	-1.4	9.37988	-0.593105	-0.811962	-0.188431	-0.629753	-0.809914	-0.673965	-0.609039	-0.936218	-0.751503	-0.673279
	-1.4	9.39012	-0.568207	-0.802601	-0.163982	-0.578362	-0.769184	-0.62254	-0.547005	-0.971722	-0.732796	-0.679703
	-1.4	9.40036	-0.65638	-0.882256	-0.228642	-0.625656	-0.778984	-0.670853	-0.527992	-1.00772	-0.685173	-0.704605
	-1.4	9.4106	-0.56514	-0.811947	-0.219448	-0.649933	-0.698143	-0.704605	-0.534916	-1.0997	-0.683708	-0.676102
	-1.4	9.42084	-0.45293	-0.817375	-0.193413	-0.708252	-0.702091	-0.666515	-0.540268	-0.999439	-0.759357	-0.646099
	-1.4	9.43108	-0.493793	-0.781395	-0.22039	-0.670631	-0.733978	-0.640266	-0.602722	-0.946701	-0.763924	-0.589832
	-1.4	9.44132	-0.512375	-0.763119	-0.270935	-0.665291	-0.817654	-0.660957	-0.548279	-0.97401	-0.719826	-0.628872
	-1.4	9.45156	-0.537689	-0.76466	-0.215225	-0.620243	-0.762436	-0.734619	-0.493469	-0.96817	-0.795921	-0.65612
	-1.4	9.4618	-0.536243	-0.80624	-0.163536	-0.620075	-0.712631	-0.722462	-0.497234	-0.951908	-0.806099	-0.68354
	-1.4	9.47204	-0.436218	-0.768402	-0.216862	-0.603958	-0.66827	-0.778442	-0.552368	-0.923225	-0.677341	-0.697868
	-1.4	9.48228	-0.545891	-0.735725	-0.289436	-0.634914	-0.746078	-0.735275	-0.551975	-0.791538	-0.633915	-0.64386
	-1.4	9.49252	-0.647415	-0.855686	-0.327751	-0.572544	-0.558159	-0.660282	-0.487175	-0.77058	-0.743145	-0.602539
	-1.4	9.50276	-0.576607	-0.890831	-0.310799	-0.619133	-0.496361	-0.618679	-0.495338	-0.823654	-0.786171	-0.611298
	-1.4	9.513	-0.487549	-0.913277	-0.163338	-0.647671	-0.645752	-0.721676	-0.534237	-0.874077	-0.699551	-0.596245
	-1.4	9.52324	-0.528805	-0.819195	-0.260479	-0.66404	-0.623375	-0.712555	-0.573658	-0.832245	-0.665157	-0.608154
	-1.4	9.53348	-0.592522	-0.836075	-0.152119	-0.651913	-0.625416	-0.622253	-0.60141	-0.752518	-0.814278	-0.709122
	-1.4	9.54372	-0.641312	-0.827206	0.279381	-0.700706	-0.616547	-0.720627	-0.585533	-0.821255	-0.945728	-0.670872
	-1.4	9.55396	-0.549252	-0.790798	0.0198059	-0.652668	-0.671883	-0.73122	-0.548088	-0.776264	-0.799675	-0.566261
	-1.4	9.5642	-0.480824	-0.779499	-0.16256	-0.68161	-0.730091	-0.635017	-0.576923	-0.883865	-0.664536	-0.621803
	-1.4	9.57444	-0.514893	-0.723816	-0.301407	-0.704689	-0.742935	-0.593464	-0.52607	-0.893341	-0.737015	-0.600609
	-1.4	9.58468	-0.588779	-0.785194	-0.371452	-0.676304	-0.74918	-0.686016	-0.497055	-0.949669	-0.768906	-0.5704
	-1.4	9.59492	-0.669006	-0.767521	-0.253876	-0.609489	-0.750549	-0.633781	-0.566257	-0.836395	-0.735779	-0.654922
	-1.4	9.60516	-0.646343	-0.814251	-0.290794	-0.640995	-0.726707	-0.617401	-0.556351	-0.855801	-0.742455	-0.681229
	-1.4	9.6154	-0.610439	-0.899483	-0.351738	-0.548248	-0.694473	-0.665417	-0.519695	-0.825188	-0.835434	-0.633415
	-1.4	9.62564	-0.674683	-0.858833	-0.242191	-0.615959	-0.793098	-0.670258	-0.563446	-0.833389	-0.807152	-0.627918
	-1.4	9.63588	-0.748672	-0.863651	-0.236557	-0.699612	-0.69928	-0.670273	-0.648735	-0.741447	-0.760384	-0.649326
	-1.4	9.64612	-0.664501	-0.946819	-0.321823	-0.731728	-0.706703	-0.621834	-0.544144	-0.740906	-0.667053	-0.679871
	-1.4	9.65636	-0.506218	-0.884544	-0.249176	-0.676876	-0.699421	-0.616295	-0.551292	-0.754475	-0.56464	-0.647076
	-1.4	9.6666	-0.541527	-0.887444	-0.225456	-0.669998	-0.71183	-0.683895	-0.622452	-0.798954	-0.619572	-0.636803
	-1.4	9.67684	-0.583591	-0.943626	-0.184399	-0.621231	-0.694733	-0.678616	-0.652672	-0.85952	-0.625698	-0.569519
	-1.4	9.68708	-0.640469	-0.85236	-0.176628	-0.551205	-0.605507	-0.739853	-0.637459	-0.858795	-0.597866	-0.513905
	-1.4	9.69732	-0.675682	-0.856544	-0.208241	-0.570778	-0.559422	-0.697166	-0.550949	-0.924801	-0.501366	-0.545368
	-1.4	9.70756	-0.669781	-0.913979	-0.192425	-0.602299	-0.621674	-0.584538	-0.474117	-0.811111	-0.602348	-0.555523
	-1.4	9.7178	-0.647835	-0.920013	-0.197014	-0.56419	-0.60025	-0.681717	-0.567078	-0.775875	-0.673325	-0.640911
	-1.4	9.72804	-0.658588	-0.972393	-0.327858	-0.43499	-0.580582	-0.659935	-0.555099	-0.831161	-0.656803	-0.642986
	-1.4	9.73828	-0.60976	-0.953751	-0.311943	-0.445625	-0.643726	-0.625961	-0.623383	-0.824081	-0.570923	-0.620731
	-1.4	9.74852	-0.645962	-0.964226	-0.285728	-0.592072	-0.725006	-0.61565	-0.688049	-0.83009	-0.625916	-0.608738
[truncated: 17,016 more rows]
