# Supplementary material for: Glycinergic axonal inhibition subserves acute spatial sensitivity to sudden increases in sound intensity
Source: eLife journal article supplement (doi:10.7554/elife.62183), 2021-06-14
Supplement: supp [file elife-62183-supp-v1.zip › elife_poa_e62183_Figure_2_source_data_1.xlsx]

## Sheet: panel A
		Top panel												Bottom panel
		Post-stimulus time (ms)	Vm rel (mV)	Vm rel (mV)	Vm rel (mV)	Vm rel (mV)	Vm rel (mV)	Vm rel (mV)	Vm rel (mV)	Vm rel (mV)	Vm rel (mV)	Vm rel (mV)		Post-stimulus time (ms)	Vm rel (mV)	Vm rel (mV)	Vm rel (mV)	Vm rel (mV)	Vm rel (mV)	Vm rel (mV)	Vm rel (mV)	Vm rel (mV)	Vm rel (mV)	Vm rel (mV)
		0.00737282	0.614468	0.273624	0.283543	-0.00439453	0.175659	0.319424	0.135628	-0.438225	-0.313801	-0.06847		0.00737282	-0.166901	-0.160019	-0.0866089	0.192848	-0.812084	-0.248749	-0.394432	-0.106541	-0.206932	0.232189
		0.0176128	0.678055	0.322227	0.338737	0.000896454	0.165539	0.366764	0.224285	-0.384708	-0.332447	-0.146374		0.0176128	-0.172909	-0.164467	-0.196724	0.212749	-0.783531	-0.343552	-0.314991	-0.214142	-0.225788	0.185028
		0.0278529	0.623611	0.117722	0.35289	0.171047	0.195709	0.241642	0.316029	-0.380177	-0.387489	-0.0832024		0.0278529	-0.0883636	-0.107105	-0.217255	0.201496	-0.794346	-0.340549	-0.401321	-0.168839	-0.268856	0.0804367
		0.0380929	0.580505	0.0774918	0.385441	0.252918	0.226917	0.237087	0.337151	-0.360962	-0.325809	0.0294495		0.0380929	-0.115433	-0.126999	-0.297695	0.251419	-0.729721	-0.390953	-0.487976	-0.107353	-0.219303	0.110325
		0.0483329	0.519123	0.195518	0.317173	0.184399	0.16655	0.217834	0.369991	-0.325771	-0.322731	0.0239754		0.0483329	-0.16431	-0.24255	-0.245422	0.283585	-0.618729	-0.381699	-0.516479	-0.132687	-0.244156	0.288887
		0.058573	0.433174	0.26453	0.297752	0.0408783	0.15551	0.211315	0.311237	-0.287361	-0.235233	0.0508842		0.058573	-0.193935	-0.198715	-0.159351	0.281639	-0.691181	-0.424534	-0.448174	-0.0966606	-0.24696	0.289017
		0.068813	0.44762	0.326233	0.340645	0.0236435	0.155632	0.227982	0.233681	-0.31086	-0.108658	0.0692177		0.068813	-0.190609	-0.0909653	-0.215096	0.256104	-0.668865	-0.443321	-0.424511	-0.137695	-0.194946	0.354591
		0.079053	0.524059	0.327877	0.25634	-0.024662	0.150543	0.228706	0.227409	-0.360912	-0.117752	0.0614319		0.079053	-0.244801	-0.0612793	-0.294823	0.213856	-0.646156	-0.437935	-0.383217	-0.0860367	-0.250061	0.339111
		0.089293	0.524834	0.300373	0.200825	-0.0489349	0.169266	0.269665	0.266159	-0.324688	-0.0691757	0.0384865		0.089293	-0.317268	-0.09021	-0.318424	0.143776	-0.650772	-0.299603	-0.326832	-0.024025	-0.274246	0.229137
		0.0995331	0.581062	0.285393	0.250343	0.0438843	0.175514	0.331764	0.346523	-0.246655	-0.0561333	0.164787		0.0995331	-0.348385	-0.0811729	-0.310856	0.201424	-0.745193	-0.215919	-0.286682	-0.000419617	-0.195702	0.147659
		0.109773	0.658779	0.298981	0.254623	0.0359116	0.131302	0.472393	0.414932	-0.220619	0.0127373	0.174431		0.109773	-0.17062	-0.0164337	-0.266331	0.18285	-0.802879	-0.201599	-0.263771	-0.111858	-0.127678	0.0872803
		0.120013	0.60051	0.338585	0.247684	0.140919	0.135437	0.527252	0.400597	-0.17757	0.101173	0.20713		0.120013	-0.227432	0.0379982	-0.294678	0.149624	-0.752743	-0.226871	-0.283939	-0.213772	-0.0937614	0.0613136
		0.130253	0.559391	0.336422	0.27956	0.0869789	0.154835	0.524559	0.364021	-0.210449	0.0741043	0.25988		0.130253	-0.292843	-0.0864906	-0.358349	0.211605	-0.659935	-0.226074	-0.385624	-0.144283	-0.125542	0.136047
		0.140493	0.566223	0.25827	0.226002	0.0498199	0.280602	0.487652	0.296288	-0.211391	0.167686	0.300461		0.140493	-0.259918	-0.0999832	-0.401608	0.156006	-0.720795	-0.288254	-0.433212	0.301033	-0.157753	0.198643
		0.150733	0.509293	0.266018	0.244156	0.116814	0.229347	0.463188	0.364891	-0.157448	0.131954	0.319447		0.150733	-0.248795	-0.0251846	-0.358719	0.184948	-0.726074	-0.385872	-0.386292	0.442776	-0.158257	0.195496
		0.160973	0.519493	0.222664	0.200966	0.0069046	0.256805	0.478104	0.415123	-0.0932884	0.108749	0.275642		0.160973	-0.233429	-0.0514565	-0.323303	0.213799	-0.761993	-0.39455	-0.418964	0.231354	-0.142376	0.187645
		0.171213	0.434437	0.205711	0.178661	0.0329056	0.250202	0.555817	0.48584	-0.0992737	0.177387	0.380508		0.171213	-0.231918	-0.070961	-0.32534	0.128899	-0.744526	-0.361317	-0.442379	0.0722008	-0.136272	0.17728
		0.181453	0.399239	0.204079	0.244812	-0.0165176	0.250069	0.484161	0.458366	0.0291977	0.189129	0.287594		0.181453	-0.199669	-0.178902	-0.348274	0.131218	-0.770706	-0.270145	-0.488129	-0.0124741	-0.0560684	0.225037
		0.191693	0.318611	0.212517	0.273972	0.00265121	0.336079	0.38065	0.506725	-0.0491486	0.123611	0.254669		0.191693	-0.107651	-0.299557	-0.193413	0.193256	-0.736347	-0.276669	-0.516716	-0.0925827	-0.171165	0.230965
		0.201933	0.426498	0.217621	0.2453	0.0936317	0.317123	0.293411	0.506439	-0.109333	0.0837708	0.323357		0.201933	-0.0542793	-0.315994	-0.0718918	0.162666	-0.73753	-0.203934	-0.448139	-0.133842	-0.26025	0.154179
		0.212173	0.385456	0.222435	0.270214	0.116791	0.238327	0.306168	0.391953	-0.0934219	0.130013	0.349655		0.212173	-0.267776	-0.262016	-0.0152168	0.17342	-0.745575	-0.232059	-0.41774	-0.0727234	-0.276501	0.109333
		0.222413	0.350346	0.260605	0.272087	0.188221	0.297394	0.452579	0.376801	-0.151787	0.180107	0.38393		0.222413	-0.396713	-0.278408	-0.127167	0.256172	-0.751942	-0.32497	-0.3568	-0.0492401	-0.226528	0.156158
		0.232653	0.410393	0.281029	0.29818	0.2458	0.214462	0.504402	0.319916	-0.170143	0.157124	0.312454		0.232653	-0.463383	-0.24921	-0.230877	0.204937	-0.782806	-0.251144	-0.470844	-0.145634	-0.159199	0.238747
		0.242893	0.336342	0.303593	0.257294	0.196388	0.111038	0.580563	0.277332	-0.167809	0.0675507	0.407402		0.242893	-0.36779	-0.190895	-0.277748	0.234875	-0.728424	-0.224152	-0.488537	-0.320808	-0.243584	0.211128
		0.253133	0.270954	0.212589	0.256329	0.241413	0.121132	0.581089	0.412613	-0.189751	0.060955	0.349384		0.253133	-0.272926	-0.210922	-0.225822	0.240295	-0.661198	-0.184399	-0.456673	-0.234215	-0.397095	0.201195
		0.263373	0.26696	0.132065	0.146568	0.202431	0.175861	0.694065	0.355877	-0.186199	-0.0307503	0.286476		0.263373	-0.264317	-0.188652	-0.298279	0.228271	-0.645988	-0.284225	-0.33168	-0.197929	-0.416389	0.124542
		0.273614	0.328522	0.174797	0.16016	0.172619	0.0992584	0.731808	0.382286	-0.131142	-0.0898056	0.305382		0.273614	-0.29884	-0.223526	-0.379738	0.184544	-0.684921	-0.394684	-0.375214	-0.156219	-0.217587	0.110157
		0.283854	0.399151	0.275543	0.166874	0.18684	0.15451	0.781876	0.344578	-0.0959244	0.0558891	0.349678		0.283854	-0.298492	-0.280849	-0.352676	0.230942	-0.689926	-0.360172	-0.352295	-0.236217	-0.239616	0.122364
		0.294094	0.385777	0.348358	0.188175	0.146179	0.217968	0.811256	0.373417	-0.128471	0.0920105	0.315434		0.294094	-0.285919	-0.283997	-0.172798	0.281986	-0.745789	-0.35247	-0.343067	-0.25695	-0.258293	0.176353
		0.304334	0.354378	0.33876	0.189548	0.161892	0.291473	0.673927	0.446571	-0.162407	0.0072403	0.275974		0.304334	-0.338753	-0.252716	-0.0182571	0.297752	-0.846176	-0.384727	-0.317852	-0.236671	-0.218613	0.261967
		0.314574	0.280205	0.205856	0.105457	0.181465	0.30592	0.59034	0.444534	-0.105438	-0.0242195	0.271755		0.314574	-0.36673	-0.23703	-0.0326309	0.220615	-0.811333	-0.28878	-0.317268	-0.224861	-0.180332	0.198608
		0.324814	0.207169	0.215473	0.082737	0.136856	0.319412	0.609619	0.458794	-0.118729	-0.110134	0.225224		0.324814	-0.390472	-0.188168	-0.119179	0.140137	-0.605995	-0.271454	-0.436527	-0.242859	-0.240891	0.176826
		0.335054	0.215843	0.1912	0.168648	0.112263	0.253979	0.670582	0.454941	-0.0949821	-0.0818672	0.259785		0.335054	-0.345413	-0.119629	-0.18169	0.122795	-0.515694	-0.259537	-0.396889	-0.172966	-0.231369	0.092762
		0.345294	0.302082	0.239925	0.115044	0.115448	0.300938	0.635178	0.468639	-0.117107	-0.0514946	0.310829		0.345294	-0.219955	-0.101597	-0.180752	0.118179	-0.52766	-0.314625	-0.364597	-0.208584	-0.209682	0.037117
		0.355534	0.328213	0.244812	0.168194	0.185898	0.267273	0.606136	0.449623	-0.0675163	-0.0834579	0.377731		0.355534	-0.20229	-0.152962	-0.128143	0.154037	-0.516659	-0.367149	-0.41391	-0.277359	-0.292221	0.0517044
		0.365774	0.238281	0.197414	0.202671	0.160248	0.236668	0.630894	0.34948	0.00637817	-0.0045166	0.356426		0.365774	-0.290936	-0.186531	-0.190083	0.199455	-0.513535	-0.323742	-0.555473	-0.283043	-0.212509	0.0900192
		0.376014	0.139965	0.230125	0.335232	0.0681229	0.247112	0.565392	0.338867	-0.0673637	0.081459	0.363342		0.376014	-0.289028	-0.181763	-0.232632	0.19463	-0.486668	-0.2714	-0.569492	-0.332039	-0.226669	-0.00630188
		0.386254	0.0872421	0.238449	0.316132	0.0363617	0.2803	0.633827	0.412373	-0.106583	0.212196	0.289494		0.386254	-0.253597	-0.129612	-0.176826	0.214848	-0.52182	-0.318081	-0.414604	-0.28141	-0.366798	-0.0157661
		0.396494	0.055687	0.293118	0.304283	0.092926	0.322754	0.684799	0.379211	-0.0428848	0.24715	0.345222		0.396494	-0.263912	-0.0666771	-0.209969	0.211769	-0.521835	-0.445667	-0.310844	-0.150757	-0.373619	-0.0271873
		0.406734	0.125008	0.309624	0.269348	0.0478325	0.303997	0.688709	0.426094	0.0385208	0.108471	0.405087		0.406734	-0.283138	-0.00571442	-0.221935	0.296982	-0.610844	-0.402576	-0.273697	-0.0929756	-0.297276	-0.0125465
		0.416974	0.12112	0.237766	0.146751	-0.0563583	0.313763	0.632751	0.46933	0.0522919	0.114399	0.444107		0.416974	-0.241821	0.00712204	-0.192196	0.329823	-0.580582	-0.354725	-0.204594	-0.182144	-0.249283	0.0803795
		0.427214	0.0860252	0.173344	0.129036	-0.0957832	0.314575	0.655655	0.48138	0.0846901	0.160603	0.328903		0.427214	-0.20105	-0.178185	-0.129467	0.306625	-0.486843	-0.38673	-0.287231	-0.290245	-0.168365	0.14444
		0.437454	0.0138664	0.1838	0.153381	-0.0339851	0.256187	0.711956	0.394993	0.0687027	0.165741	0.32803		0.437454	-0.207241	-0.219448	-0.25782	0.254948	-0.495705	-0.496941	-0.366005	-0.382534	-0.16716	0.215683
		0.447694	-0.0803795	0.269321	0.216393	0.0722542	0.2379	0.581699	0.329403	0.0101624	0.143707	0.369373		0.447694	-0.235661	-0.224621	-0.33744	0.15498	-0.53529	-0.411934	-0.307259	-0.483521	-0.205334	0.123066
		0.457934	-0.0715599	0.302677	0.108269	0.140823	0.198761	0.608593	0.254814	0.0151215	0.125271	0.359398		0.457934	-0.204796	-0.220055	-0.392288	0.17057	-0.540787	-0.323494	-0.390083	-0.55117	-0.216969	0.154812
		0.468174	-0.095005	0.291306	0.0471725	0.117817	0.161629	0.681858	0.300148	0.0860825	0.131207	0.423412		0.468174	-0.264153	-0.173824	-0.397068	0.133354	-0.487175	-0.200039	-0.426117	-0.48682	-0.234119	0.0127487
		0.478414	-0.103722	0.297562	0.0896111	0.0992203	0.190056	0.653019	0.39624	0.0455055	0.108437	0.325089		0.478414	-0.310936	-0.243622	-0.395687	0.233765	-0.47578	-0.265129	-0.430458	-0.330669	-0.230137	-0.0263863
		0.488654	-0.167595	0.240387	0.129276	0.114613	0.199512	0.700943	0.483696	0.0292664	0.0880127	0.265564		0.488654	-0.216824	-0.184971	-0.386482	0.197704	-0.531548	-0.412529	-0.445549	-0.234619	-0.296276	-3.8147e-05
		0.498894	-0.189507	0.213161	0.060112	0.124626	0.162655	0.75634	0.486713	-0.0344925	0.0348854	0.181728		0.498894	-0.272316	-0.0887299	-0.30426	0.140507	-0.617416	-0.458893	-0.498016	-0.163395	-0.310173	0.0641899
		0.509134	-0.226158	0.151947	-0.00842667	0.274338	0.230484	0.765743	0.419647	-0.0693283	0.0561867	0.156551		0.509134	-0.294201	-0.0752144	-0.25782	0.0887451	-0.610882	-0.414284	-0.50351	-0.142773	-0.283211	0.0110092
		0.519374	-0.152813	0.103455	-0.0277939	0.33112	0.180092	0.688545	0.45356	-0.043293	0.0710869	0.226799		0.519374	-0.208385	-0.284725	-0.200359	0.119312	-0.568348	-0.363056	-0.462788	-0.214298	-0.213367	-0.0228081
		0.529614	-0.0523186	0.185478	0.043087	0.231018	0.160198	0.577454	0.454346	-0.0666962	0.0706558	0.32547		0.529614	-0.272648	-0.349728	-0.187866	0.164185	-0.564056	-0.330978	-0.588291	-0.241737	-0.140221	-0.00719452
		0.539854	-0.105011	0.151817	0.0514069	0.130573	0.164562	0.598366	0.42308	0.00737	0.0789299	0.324589		0.539854	-0.345749	-0.292572	-0.100273	0.0923004	-0.608341	-0.414043	-0.597969	-0.271217	-0.178703	-0.0431938
		0.550094	-0.0914764	0.0839767	0.0574493	0.0987434	0.129501	0.587708	0.409523	0.125114	0.037796	0.263718		0.550094	-0.381439	-0.210697	-0.0375671	0.0507278	-0.640041	-0.442108	-0.627144	-0.222927	-0.197727	0.0664902
		0.560334	-0.176346	0.0187302	0.0690269	0.0895386	0.0501785	0.605167	0.364365	0.125103	0.0956917	0.309471		0.560334	-0.451035	-0.229256	-0.0610886	0.0978775	-0.632324	-0.324528	-0.540001	-0.300282	-0.211445	0.0349922
		0.570574	-0.24477	-0.0453568	0.0922241	0.112667	0.0267334	0.641304	0.428955	0.0563202	0.0724716	0.319614		0.570574	-0.405804	-0.123436	-0.0343475	0.22858	-0.600296	-0.268158	-0.473896	-0.331753	-0.202053	-0.0558929
		0.580814	-0.199162	-0.104771	0.100365	0.0669785	0.0874557	0.714603	0.461308	0.0288048	0.0471649	0.317505		0.580814	-0.401848	-0.102154	-0.0739632	0.175682	-0.521214	-0.26416	-0.396675	-0.425068	-0.211281	-0.0351105
		0.591054	-0.219498	-0.0643196	0.0855103	-0.0441742	0.129658	0.806992	0.425011	-0.00706482	0.0582733	0.262028		0.591054	-0.355942	-0.0485573	-0.181374	0.132114	-0.498302	-0.257595	-0.423103	-0.308022	-0.200813	-0.0511017
		0.601294	-0.233826	-0.0374756	0.133648	-0.0628586	0.212326	0.829987	0.458065	0.0629082	0.108437	0.222149		0.601294	-0.246567	0.0144653	-0.183266	0.0725594	-0.426929	-0.222713	-0.412647	-0.185638	-0.167957	-0.0512543
		0.611534	-0.290833	0.0494156	0.132145	-0.0319099	0.208145	0.867355	0.402573	0.0557556	0.148731	0.256958		0.611534	-0.270256	-0.0764198	-0.149242	0.147694	-0.369492	-0.235023	-0.467186	-0.217804	-0.132736	-0.0294838
		0.621774	-0.297756	0.141602	0.0337029	0.0183716	0.144104	0.711693	0.322727	0.0961685	0.113716	0.272137		0.621774	-0.27092	-0.10968	-0.0569992	0.133568	-0.358803	-0.42297	-0.392372	-0.212708	-0.134285	-0.0175171
		0.632014	-0.327145	0.0729218	0.0783501	0.000911713	0.0672226	0.587837	0.28397	0.0440521	0.0373878	0.32962		0.632014	-0.279755	-0.106438	-0.164062	0.0992966	-0.444252	-0.435417	-0.397545	-0.199192	-0.148312	-0.0812225
		0.642254	-0.368423	0.0825081	0.0646248	-0.0223579	0.00189972	0.597633	0.271446	-0.0636902	-0.016304	0.233952		0.642254	-0.207344	-0.0634499	-0.217312	0.0513878	-0.474865	-0.415558	-0.381104	-0.0841064	-0.128849	-0.0330353
		0.652494	-0.398964	0.111465	0.0309029	0.0345154	0.0194473	0.609497	0.272541	-0.080761	-0.00790024	0.154629		0.652494	-0.240677	-0.186806	-0.26656	0.0286903	-0.466496	-0.305611	-0.343662	-0.104919	-0.0558701	-0.00322723
		0.662735	-0.424023	0.123489	-0.0712738	0.224438	0.14209	0.514023	0.306286	-0.0243301	0.0767746	0.153938		0.662735	-0.287598	-0.292522	-0.241669	0.0734978	-0.477165	-0.363533	-0.347965	-0.166168	-0.122231	-0.0299149
		0.672975	-0.416908	0.0416107	-0.138279	0.142628	0.192894	0.498394	0.323299	-0.000686646	0.0862427	0.242546		0.672975	-0.330978	-0.19664	-0.197105	0.152477	-0.53479	-0.353798	-0.404579	-0.19632	-0.226479	-0.0748062
		0.683215	-0.428566	0.0445633	-0.12096	0.0820923	0.182491	0.559574	0.363522	-0.0629044	0.0989227	0.23859		0.683215	-0.370937	-0.0101624	-0.22921	0.169151	-0.510269	-0.3517	-0.377171	-0.104538	-0.295647	-0.10585
		0.693455	-0.412674	0.043396	-0.121159	0.0819817	0.170769	0.585976	0.426346	-0.117882	0.0943336	0.244728		0.693455	-0.444824	-0.0674324	-0.300423	0.172741	-0.357826	-0.365788	-0.281818	-0.115433	-0.322037	0.0107117
		0.703695	-0.422367	-0.0105705	-0.09235	0.0679779	0.186863	0.454132	0.368622	-0.146099	0.0823059	0.313652		0.703695	-0.443298	-0.181595	-0.313454	0.126572	-0.243717	-0.331726	-0.241177	-0.148598	-0.277939	-0.025589
		0.713935	-0.346672	-0.00313187	-0.102673	0.0573692	0.20359	0.475899	0.188438	-0.179943	0.0308914	0.284138		0.713935	-0.32626	-0.184517	-0.266296	0.0693893	-0.276939	-0.253597	-0.168427	-0.165596	-0.331562	-0.100845
		0.724175	-0.493416	0.149017	-0.0913696	-0.0117035	0.144154	0.471859	0.0983047	-0.136753	0.0127602	0.277477		0.724175	-0.299198	-0.224583	-0.339455	0.0674171	-0.355354	-0.199444	-0.207085	-0.0637932	-0.309357	-0.0633087
		0.734415	-0.507652	0.178329	-0.0914421	-0.0406113	0.0957642	0.534763	0.140156	-0.160202	-0.0621986	0.234299		0.734415	-0.306385	-0.168457	-0.307934	0.113289	-0.456184	-0.222572	-0.330788	-0.0708389	-0.289757	-0.0390854
		0.744655	-0.544735	0.07687	-0.0616264	-0.029026	0.143654	0.510696	0.244385	-0.123009	-0.110836	0.218693		0.744655	-0.313751	-0.238197	-0.303085	0.258892	-0.407345	-0.272804	-0.349682	-0.211533	-0.269547	0.109444
		0.754895	-0.515408	0.035553	-0.126633	0.0381279	0.0902328	0.560272	0.211197	-0.0902023	-0.202736	0.169876		0.754895	-0.266632	-0.295105	-0.273472	0.264793	-0.393574	-0.277966	-0.340599	-0.270111	-0.186142	0.157993
		0.765135	-0.435719	0.0620728	-0.0789986	-0.0295486	0.00982666	0.573433	0.294094	-0.0773773	-0.145218	0.180775		0.765135	-0.266903	-0.324066	-0.275032	0.170822	-0.381737	-0.10685	-0.387295	-0.179367	-0.248535	0.130543
		0.775375	-0.453514	-0.0173988	-0.0177803	-0.0725708	-0.00786209	0.595764	0.228516	-0.122841	-0.0956497	0.167183		0.775375	-0.234715	-0.248676	-0.352699	0.0384521	-0.416119	-0.171215	-0.32312	-0.202911	-0.330097	0.111431
		0.785615	-0.479122	-0.0793419	-0.0893784	0.0274963	-0.00828171	0.453606	0.238384	-0.10881	-0.0369263	0.130692		0.785615	-0.241344	-0.22686	-0.344795	0.0491219	-0.485939	-0.238022	-0.362904	-0.103466	-0.326744	0.0810699
		0.795855	-0.438843	-0.170883	-0.0810318	0.0345039	-0.0198555	0.448471	0.225479	-0.136204	-0.0678177	0.114525		0.795855	-0.250546	-0.174587	-0.297504	0.0768013	-0.385872	-0.284107	-0.391537	-0.156872	-0.312954	0.0829315
		0.806095	-0.391041	-0.164028	-0.0831223	0.0528145	-0.0374527	0.507576	0.231853	-0.196564	-0.110374	0.282635		0.806095	-0.353798	-0.167377	-0.233952	0.0991974	-0.325432	-0.229805	-0.418442	-0.264519	-0.355286	0.0748329
		0.816335	-0.416466	-0.152908	-0.14579	-0.00363159	0.0166702	0.538269	0.280014	-0.113983	-0.045105	0.297264		0.816335	-0.389427	-0.201614	-0.252571	0.0794487	-0.383335	-0.260822	-0.369221	-0.287003	-0.357143	0.114067
		0.826575	-0.510986	-0.132927	-0.00740814	-0.0527725	-0.0950279	0.511875	0.285416	-0.0794029	0.00501251	0.251141		0.826575	-0.362625	-0.189358	-0.333912	0.187164	-0.328201	-0.250999	-0.363594	-0.29203	-0.327858	0.0887337
		0.836815	-0.577744	-0.106567	-0.0338516	-0.0614357	-0.120102	0.423756	0.22736	-0.127262	-0.0737534	0.14967		0.836815	-0.354713	-0.224216	-0.493187	0.206249	-0.463787	-0.244862	-0.481613	-0.304169	-0.358589	0.0232391
		0.847055	-0.530228	-0.0910721	-0.0900345	-0.0296059	-0.0577087	0.495472	0.156765	-0.167843	-0.133118	0.10318		0.847055	-0.282486	-0.205048	-0.434788	0.256142	-0.547726	-0.316174	-0.595741	-0.292366	-0.284843	-0.00589752
		0.857295	-0.420898	-0.13773	-0.200005	-0.0502548	-0.0966873	0.534206	0.163689	-0.10881	-0.0783539	0.0503922		0.857295	-0.205986	-0.150791	-0.423367	0.177795	-0.515022	-0.275913	-0.540047	-0.295845	-0.248154	0.0486221
		0.867535	-0.362415	-0.0362091	-0.172585	-0.0165787	-0.0887985	0.593357	0.140934	-0.0884857	-0.154846	0.0531807		0.867535	-0.234932	-0.250214	-0.369972	0.119289	-0.461323	-0.114288	-0.28693	-0.24902	-0.233154	0.0969582
		0.877775	-0.375862	-0.0411453	-0.0977135	-0.0109291	-0.0509453	0.57159	0.150291	-0.131927	-0.145096	0.0152168		0.877775	-0.259129	-0.300152	-0.393398	0.121132	-0.442177	-0.0397987	-0.203712	-0.193722	-0.25354	0.207775
		0.888015	-0.328415	-0.0234299	-0.112282	-0.0795555	-0.079483	0.571861	0.186672	-0.18961	-0.218674	0.0235214		0.888015	-0.360973	-0.251858	-0.576225	0.186546	-0.523415	-0.0560455	-0.270828	-0.170883	-0.333412	0.172035
		0.898255	-0.441586	-0.0231361	-0.106091	-0.0331726	-0.138229	0.511292	0.150837	-0.139709	-0.242218	0.0436821		0.898255	-0.377853	-0.254925	-0.600662	0.133911	-0.476185	-0.121277	-0.337044	-0.210175	-0.319973	0.0245743
		0.908495	-0.374481	-0.179466	-0.12809	-0.0644302	-0.176807	0.516159	0.131184	-0.167747	-0.261505	0.141445		0.908495	-0.24968	-0.183266	-0.53838	0.0353737	-0.502213	-0.307159	-0.474365	-0.229271	-0.224342	-0.0570679
		0.918735	-0.301929	-0.263199	-0.116104	-0.111446	-0.173698	0.520424	0.12709	-0.179691	-0.301762	0.167503		0.918735	-0.179642	-0.130337	-0.43861	0.0178642	-0.550228	-0.377876	-0.536674	-0.263302	-0.214153	0.0443764
		0.928975	-0.320858	-0.234219	-0.123161	-0.0893707	-0.155205	0.428715	0.205223	-0.162182	-0.0725365	0.112778		0.928975	-0.165024	-0.0610733	-0.426811	0.0655022	-0.472847	-0.392445	-0.660046	-0.224312	-0.24387	0.0713882
		0.939215	-0.371307	-0.253197	-0.140949	-0.0840759	-0.123631	0.46331	0.199562	-0.118744	0.134377	0.085701		0.939215	-0.194088	-0.108604	-0.393158	0.0463409	-0.42445	-0.324471	-0.635094	-0.222977	-0.276478	0.114769
		0.949455	-0.40308	-0.149689	-0.163517	-0.0503159	-0.0720825	0.464119	0.176579	-0.134048	0.103813	0.0915337		0.949455	-0.235756	-0.151642	-0.345024	0.110096	-0.343433	-0.360855	-0.583702	-0.258629	-0.1954	0.0944214
		0.959695	-0.32658	-0.0678635	-0.102562	-0.0690651	-0.1366	0.45591	0.123016	-0.169846	0.0423813	0.0479507		0.959695	-0.193291	-0.141182	-0.294525	0.194305	-0.41843	-0.270145	-0.646919	-0.320942	-0.569122	0.117008
		0.969935	-0.388344	-0.0239792	-0.123283	-0.0700188	-0.184151	0.478165	0.0587044	-0.110897	0.0580597	0.093235		0.969935	-0.114758	-0.126724	-0.293007	0.158653	-0.498802	-0.245041	-0.535267	-0.348457	-0.9375	0.0593834
		0.980175	-0.406204	-0.0359383	-0.106236	-0.0907745	-0.109573	0.493484	0.138725	-0.0744057	0.0353394	0.142113		0.980175	-0.229805	-0.123039	-0.326126	0.103611	-0.423759	-0.295677	-0.536972	-0.363056	-0.783768	0.0173187
		0.990415	-0.344318	-0.0735931	-0.111671	-0.143284	-0.0916214	0.496593	0.19651	-0.0717964	-0.074501	0.13755		0.990415	-0.233372	-0.18026	-0.34359	0.108368	-0.385372	-0.316532	-0.576797	-0.435646	-0.650852	0.074379
		1.00066	-0.408646	-0.0375595	-0.111431	-0.0183067	-0.113495	0.508575	0.170357	-0.0952911	-0.0415268	0.111927		1.00066	-0.257984	-0.165169	-0.428837	0.20364	-0.331322	-0.373562	-0.56358	-0.458748	-0.499542	0.00201035
		1.0109	-0.468632	-0.0568237	-0.0260696	0.0699806	-0.124855	0.412994	0.209038	-0.0537262	-0.0907974	0.0732574		1.0109	-0.136513	-0.123039	-0.454052	0.278515	-0.328533	-0.482098	-0.566872	-0.330608	-0.364532	-0.0820236
		1.02114	-0.555264	0.0111961	0.0063324	0.0545082	-0.141678	0.358803	0.209217	-0.11179	-0.0697098	0.182022		1.02114	0.0475731	-0.0103531	-0.278561	0.197014	-0.38324	-0.467331	-0.5411	-0.27565	-0.280468	-0.0211639
		1.03138	-0.53162	-0.00965118	0.0108032	0.0466385	-0.110184	0.327816	0.211292	-0.0602417	-0.0430679	0.193291		1.03138	0.0662651	0.00271225	-0.124184	0.168198	-0.45348	-0.357716	-0.578552	-0.264565	-0.270279	0.0398941
		1.04162	-0.541325	-0.0825119	-0.0841484	0.0368652	-0.196236	0.251831	0.221886	0.0853691	0.0143814	0.143318		1.04162	0.0271988	0.0307617	-0.193363	0.220806	-0.48476	-0.363476	-0.539246	-0.252026	-0.316887	0.0763092
		1.05186	-0.625454	-0.117027	-0.17421	-0.0326729	-0.19046	0.264923	0.232971	-0.0133133	0.0678825	0.177696		1.05186	-0.00811386	-0.00297165	-0.257961	0.362198	-0.475281	-0.345524	-0.414402	-0.288826	-0.318462	-0.00671387
		1.0621	-0.60302	-0.147362	-0.105011	-0.154537	-0.175079	0.30859	0.180557	-0.0427818	0.0241661	0.1833		1.0621	0.0277824	-0.0491562	-0.194637	0.356155	-0.527721	-0.308102	-0.445976	-0.275188	-0.321358	-0.117451
		1.07234	-0.62582	-0.0196648	-0.0821457	-0.231133	-0.171551	0.346008	0.222435	-0.0358772	-0.0120583	0.113182		1.07234	0.0965042	-0.0776672	-0.231941	0.421375	-0.533596	-0.323551	-0.495594	-0.245586	-0.37294	-0.151508
		1.08258	-0.707741	-0.0250778	-0.174412	-0.16367	-0.120102	0.41111	0.205116	0.0413094	-0.118607	0.0855598		1.08258	0.0770035	0.0546303	-0.220066	0.291115	-0.371845	-0.228958	-0.470383	-0.267036	-0.342766	-0.133221
		1.09282	-0.71077	-0.0351639	-0.225815	-0.0263557	-0.149426	0.319603	0.303734	0.019268	-0.161713	0.0996857		1.09282	0.0655251	0.0438843	-0.240883	0.221603	-0.3009	-0.119415	-0.449745	-0.218861	-0.230354	-0.130409
		1.10306	-0.581776	-0.0502701	-0.228447	-0.0826569	-0.1623	0.280243	0.337032	-0.007267	-0.160965	0.0747261		1.10306	0.081356	-0.0415268	-0.226894	0.245148	-0.354687	-0.0654984	-0.466736	-0.174824	-0.185211	-0.0470963
		1.1133	-0.429043	-0.0689354	-0.0935745	-0.101982	-0.109932	0.299755	0.31665	0.00839615	-0.17168	0.130157		1.1133	0.0818329	0.127716	-0.244671	0.278347	-0.332779	-0.0642242	-0.47366	-0.26675	-0.200741	-0.0111504
		1.12354	-0.412197	-0.088295	-0.160759	-0.106438	-0.156181	0.266842	0.288166	-0.0160179	-0.102112	0.165871		1.12354	0.117798	0.283676	-0.290028	0.355919	-0.25087	-0.0639496	-0.483841	-0.251587	-0.275166	0.0116882
		1.13378	-0.430473	0.0183144	-0.0105324	-0.0556412	-0.151428	0.229538	0.310165	-0.0955276	0.00336456	0.166824		1.13378	0.174347	0.283257	-0.257652	0.41991	-0.271812	-0.0509644	-0.435741	-0.202805	-0.281746	0.0419312
		1.14402	-0.415668	-0.0583725	-0.00595474	0.000823975	-0.132938	0.208336	0.256351	-0.0487671	0.0613747	0.149467		1.14402	0.22958	0.195641	-0.242916	0.448067	-0.230232	-0.128166	-0.275978	-0.133125	-0.232212	0.047142
		1.15426	-0.432739	-0.149673	0.0704193	0.0848694	-0.0778885	0.19268	0.154343	-0.106354	0.120789	0.0820312		1.15426	0.09095	0.187389	-0.27129	0.421246	-0.168259	-0.158398	-0.202686	-0.14793	-0.199062	-0.0593719
		1.1645	-0.371204	-0.0625076	0.107986	0.0653419	-0.0851364	0.229729	0.165668	-0.0434036	0.0883255	0.0548897		1.1645	0.0801163	0.197285	-0.197571	0.323017	-0.118702	-0.190598	-0.275093	-0.18119	-0.135796	0.0437431
		1.17474	-0.386536	0.0364456	0.104584	0.043541	-0.0365677	0.359016	0.178604	-0.101944	0.00949478	0.102081		1.17474	0.189312	0.136265	-0.190536	0.327595	-0.0843697	-0.194294	-0.275047	-0.187641	-0.0503693	0.0544968
		1.18498	-0.458809	0.0465431	0.0918922	0.0765228	-0.0701523	0.387276	0.193657	-0.0544968	-0.0525436	0.126305		1.18498	0.167568	-0.024971	-0.206932	0.366371	-0.0447083	-0.192196	-0.269238	-0.118675	-0.0256691	0.0199509
		1.19522	-0.525063	-0.0564651	0.041584	0.0139275	-0.147663	0.36496	0.174156	-0.0642395	-0.00694656	0.109234		1.19522	0.15728	-0.131973	-0.186165	0.457588	-0.108665	-0.112228	-0.180393	-0.110474	-0.129837	0.0535202
		1.20546	-0.57449	-0.0429497	0.091938	0.0293388	-0.0873985	0.362434	0.254025	-0.102943	-0.050827	-0.0242805		1.20546	0.0918236	-0.102776	-0.0996399	0.442036	-0.207775	-0.0615768	-0.1357	-0.0893745	-0.0915451	0.0552368
		1.2157	-0.605698	-0.0680771	0.0891724	-0.0707016	-0.0772438	0.367432	0.267021	-0.0978889	-0.133724	0.030056		1.2157	0.0508232	0.0157433	-0.0540085	0.361294	-0.260406	-0.106899	-0.187031	0.0505981	-0.0708885	0.110641
		1.22594	-0.556072	-0.0862541	0.0902786	-0.0763016	-0.0881767	0.315441	0.173309	-0.142784	-0.0800934	0.102772		1.22594	0.0325508	0.0336113	-0.0205574	0.295097	-0.212925	-0.0492477	-0.241119	0.0468674	0.0381622	0.13443
		1.23618	-0.497826	-0.0919533	0.0621834	-0.0413284	-0.104912	0.381783	0.0414505	-0.193081	-0.0888443	0.0985184		1.23618	-0.0400467	0.0744514	-0.0681801	0.259941	-0.0839996	0.0234451	-0.286037	0.041214	0.091404	0.144058
		1.24642	-0.370403	-0.169582	-0.0266495	-0.0868187	-0.103661	0.407375	0.0883484	-0.238056	-0.0758362	0.132004		1.24642	-0.0335999	0.056427	-0.119247	0.348728	-0.0572739	0.0283546	-0.230152	0.00352097	0.117905	0.0955887
		1.25666	-0.659477	-0.214546	-0.0704498	-0.0726395	-0.141163	0.408878	0.145248	-0.157436	-0.00409698	0.215652		1.25666	-0.14537	0.0470085	-0.13073	0.342331	-0.0405846	0.000183105	-0.174339	0.0211868	0.0480118	-0.0180779
		1.2669	-0.974125	-0.248825	0.0101013	-0.0482407	-0.107666	0.447811	0.23394	-0.195892	-0.00247574	0.184471		1.2669	-0.163094	0.0883522	-0.086441	0.362293	-0.0464973	-0.0418587	-0.143368	0.0727234	0.138992	0.0175629
		1.27714	-0.895939	-0.173206	0.0281601	-0.0376549	-0.0502205	0.367645	0.177124	-0.138351	0.0464249	0.166145		1.27714	-0.109226	-0.00994873	-0.0327644	0.405567	-0.0126534	-0.0283661	-0.0956955	0.134865	0.231758	-0.045269
		1.28738	-0.729198	-0.166355	0.0162659	-0.0492058	-0.0634842	0.313263	0.136116	-0.0941925	0.110737	0.107494		1.28738	-0.094017	-0.0856705	-0.155228	0.426323	-0.0746422	0.0436859	-0.00642014	0.187618	0.259834	0.0807343
		1.29762	-0.615353	-0.10701	-0.0112228	-0.0944824	-0.0115128	0.267281	0.104313	-0.0500069	-0.0328255	0.0329056		1.29762	-0.0582123	-0.180702	-0.23455	0.477776	-0.0940247	-0.0193176	-0.0564156	0.153595	0.227386	0.0701752
		1.30786	-0.638458	-0.140137	-0.010128	-0.0289536	0.010601	0.216759	-0.0176773	-0.0413132	-0.0711288	0.0961113		1.30786	-0.0600891	-0.171597	-0.259201	0.404198	-0.00159073	-0.116974	-0.121029	0.0432205	0.14933	0.0920143
		1.3181	-0.589149	-0.184307	-0.0347557	0.0273743	-0.0831451	0.268166	0.0558662	0.0250397	0.0015564	0.207535		1.3181	-0.0920219	-0.241177	-0.374107	0.318592	-0.0180054	-0.0345879	-0.116688	0.0770035	0.136787	0.190838
		1.32834	-0.517544	-0.260395	-0.0555	0.0167274	-0.102051	0.269592	0.0908508	0.0600128	-0.0403366	0.332191		1.32834	-0.19025	-0.176819	-0.432735	0.280613	-0.0513382	0.0619736	-0.129349	0.032959	0.126583	0.193939
		1.33858	-0.484295	-0.282322	-0.0616264	0.0177994	-0.0741196	0.36079	0.0296021	0.0953102	-0.0624619	0.278503		1.33858	-0.209801	-0.197403	-0.454227	0.228844	-0.127094	0.00334549	-0.169331	-0.0219879	0.0912018	0.215611
		1.34882	-0.330242	-0.234829	-0.0361557	-0.00938034	-0.102993	0.331108	0.0126877	0.0911293	-0.107368	0.186363		1.34882	-0.257748	-0.192818	-0.468987	0.141769	-0.160843	-0.00330734	-0.191418	-0.00925827	0.177727	0.211937
		1.35906	-0.317226	-0.185165	0.0737457	-0.0289536	-0.11507	0.28688	0.0121994	0.114933	-0.0561333	0.163132		1.35906	-0.272789	-0.220856	-0.515381	0.126347	-0.120693	0.02771	-0.197609	-0.0786858	0.143929	0.251644
		1.3693	-0.277657	-0.286335	0.140793	-0.0554657	-0.183403	0.264481	0.0820312	0.0606461	0.031105	0.218945		1.3693	-0.261944	-0.272575	-0.434105	0.0923309	-0.192421	0.000278473	-0.225727	-0.0163155	0.0763969	0.215084
		1.37954	-0.148933	-0.295578	0.234619	-0.0552597	-0.180931	0.22506	0.174171	0.0630264	0.0335274	0.21154		1.37954	-0.339394	-0.246769	-0.483147	0.00426102	-0.256485	-0.162941	-0.270611	-0.0704689	-0.00144577	0.307266
		1.38978	-0.135895	-0.281353	0.215725	-0.112244	-0.016819	0.247849	0.091877	0.00610733	-0.0195236	0.156906		1.38978	-0.311001	-0.230545	-0.582512	0.0357704	-0.303238	-0.248486	-0.253708	-0.113956	0.0582619	0.329536
		1.40002	-0.227898	-0.228519	0.18671	-0.0728683	0.0164871	0.193825	0.0337982	0.0129013	-0.0873032	0.167969		1.40002	-0.228611	-0.223007	-0.615448	0.039547	-0.248917	-0.286621	-0.303181	-0.088295	0.00453949	0.337524
		1.41026	-0.329765	-0.232586	0.122219	-0.111408	0.0132599	0.197163	0.127869	0.0980034	-0.0594101	0.119747		1.41026	-0.222427	-0.328594	-0.688774	0.0560226	-0.218266	-0.265186	-0.28091	-0.00994873	-0.0353737	0.320427
		1.4205	-0.371262	-0.182377	0.111404	-0.124466	-0.0589943	0.202732	0.204411	0.105003	-0.0437355	0.085907		1.4205	-0.308926	-0.306145	-0.62355	0.0513954	-0.205605	-0.335579	-0.323685	-0.00411606	0.0360641	0.34837
		1.43074	-0.226017	-0.168915	0.13496	-0.105892	-0.0840034	0.212101	0.256458	0.0385208	-0.0683899	0.0535545		1.43074	-0.413662	-0.378426	-0.586994	0.0247574	-0.233261	-0.429146	-0.291077	-0.056282	0.108402	0.378521
		1.44098	-0.165375	-0.206535	0.0634346	-0.185665	-0.129719	0.178993	0.144199	0.024704	-0.0389061	0.0510025		1.44098	-0.405388	-0.399643	-0.539318	0.0780258	-0.272545	-0.389679	-0.24498	-0.103935	0.0887794	0.326164
		1.45122	-0.243195	-0.155945	0.134926	-0.22995	-0.16045	0.203377	0.0112343	0.102764	-0.0734673	0.0454102		1.45122	-0.319775	-0.409	-0.61198	0.0878983	-0.419003	-0.302162	-0.289612	-0.139824	-0.00740814	0.250069
		1.46146	-0.366898	-0.0113678	0.156265	-0.243801	-0.181431	0.288063	0.105076	0.0222969	-0.0916595	0.0265274		1.46146	-0.268642	-0.358311	-0.523083	-0.00569153	-0.536102	-0.226074	-0.419109	-0.158157	0.0148926	0.136742
		1.4717	-0.359886	-0.00342941	0.0855255	-0.214874	-0.145599	0.248375	0.247723	-0.0456772	-0.0724182	0.0681305		1.4717	-0.119026	-0.40044	-0.519928	-0.0183258	-0.478569	-0.302582	-0.48991	-0.202854	0.01157	0.0255508
		1.48194	-0.37125	-0.00881577	0.0139999	-0.0943031	-0.230324	0.241951	0.166397	-0.0856361	-0.000225067	0.069931		1.48194	-0.135025	-0.392811	-0.474483	-0.0267105	-0.400368	-0.409061	-0.510986	-0.244648	0.041214	-0.0136795
		1.49218	-0.436516	0.00228119	0.0260887	-0.0501823	-0.259228	0.389328	0.142982	-0.217163	0.0505829	0.0971375		1.49218	-0.190098	-0.433594	-0.474102	-0.0416451	-0.254066	-0.446838	-0.593704	-0.328072	0.00209045	-0.0289497
		1.50242	-0.506588	-0.0419083	0.10289	-0.139805	-0.36866	0.36644	0.148586	-0.137871	-0.0643692	0.0461235		1.50242	-0.216476	-0.381989	-0.438816	-0.0621262	-0.249203	-0.410954	-0.572044	-0.314171	-0.136223	0.00260544
		1.51266	-0.498028	-0.0821533	0.0210342	-0.140068	-0.296589	0.171173	0.212269	0.0122375	-0.0501595	0.0957794		1.51266	-0.238148	-0.403278	-0.461071	-0.0953369	-0.336044	-0.34856	-0.445992	-0.318638	-0.224503	-0.0654144
		1.5229	-0.417038	-0.0976753	0.0109825	-0.0881157	-0.253281	0.0507011	0.159817	0.0792389	-0.109119	0.168503		1.5229	-0.243645	-0.372345	-0.569672	-0.0774078	-0.360329	-0.358494	-0.410301	-0.360565	-0.221291	-0.175243
		1.53314	-0.33749	-0.157875	0.0529099	-0.163063	-0.315556	0.139717	0.278084	0.0471649	-0.0989075	0.119263		1.53314	-0.203854	-0.344093	-0.633198	0.00907898	-0.340572	-0.431305	-0.414291	-0.440567	-0.158516	0.0063591
		1.54338	-0.334782	-0.154099	-0.0302505	-0.160595	-0.366028	0.169403	0.240601	-0.0944481	-0.0325775	0.158562		1.54338	-0.18869	-0.326721	-0.659306	0.0526962	-0.387112	-0.391953	-0.431698	-0.632351	-0.138943	0.052063
		1.55362	-0.37199	-0.182693	-0.0467148	-0.0374985	-0.314922	0.212578	0.189049	-0.0635223	-0.0688019	0.172749		1.55362	-0.354877	-0.39323	-0.595169	0.0526733	-0.436775	-0.39529	-0.527176	-0.631611	-0.0571327	-0.00842285
		1.56386	-0.384087	-0.174637	-0.0621414	0.0460434	-0.301022	0.251202	0.135784	-0.0626297	-0.081131	0.121788		1.56386	-0.362152	-0.403969	-0.551193	0.0196762	-0.375381	-0.377148	-0.516064	-0.547592	-0.00897217	0.00492859
		1.5741	-0.357147	-0.159473	-0.0481071	0.144543	-0.308746	0.274078	0.142982	-0.0534401	-0.0112495	0.102654		1.5741	-0.342854	-0.459965	-0.524242	-0.0230637	-0.314957	-0.436314	-0.394279	-0.519547	-0.170311	-0.0265999
		1.58434	-0.383625	-0.274094	0.0548744	0.126175	-0.357216	0.338844	0.118214	-0.0510406	0.00111008	0.0718002		1.58434	-0.374931	-0.426594	-0.556961	-0.0955734	-0.324741	-0.42091	-0.469093	-0.42625	-0.20961	-0.0687027
		1.59458	-0.444138	-0.326962	0.123459	0.000362396	-0.271576	0.35881	0.0887909	-0.0304565	-0.10482	-0.0177803		1.59458	-0.364223	-0.315361	-0.515419	-0.0890656	-0.422722	-0.370949	-0.484402	-0.420776	-0.227291	-0.113281
		1.60482	-0.478062	-0.310169	0.132351	-0.0678864	-0.134701	0.339832	0.106514	-0.0409546	-0.107952	0.00476074		1.60482	-0.405304	-0.331932	-0.533691	-0.0840988	-0.4021	-0.335842	-0.491825	-0.444801	-0.217422	-0.240211
		1.61506	-0.523659	-0.244591	0.140221	-0.147327	-0.194809	0.252117	0.101784	0.0447884	-0.0439262	0.0587769		1.61506	-0.44381	-0.403229	-0.589638	-0.0010643	-0.328285	-0.284069	-0.531273	-0.399956	-0.178009	-0.227303
		1.6253	-0.433216	-0.265751	0.162247	-0.198112	-0.26421	0.259937	0.0394249	-0.0759926	-0.157352	0.0969467		1.6253	-0.329536	-0.3992	-0.622288	0.00864792	-0.273052	-0.317009	-0.489014	-0.39584	-0.259716	-0.203781
		1.63554	-0.297089	-0.251003	0.136627	-0.157925	-0.196918	0.253357	0.0572128	-0.106236	-0.189491	0.0390587		1.63554	-0.233826	-0.344223	-0.659664	-0.0389175	-0.323215	-0.329464	-0.444489	-0.389606	-0.291687	-0.209312
		1.64578	-0.371632	-0.289665	0.0982094	-0.134476	-0.029026	0.178913	0.0353851	-0.071106	-0.253365	0.00160217		1.64578	-0.237267	-0.331253	-0.639137	-0.139767	-0.258522	-0.353127	-0.481693	-0.387329	-0.257389	-0.200382
		1.65602	-0.428757	-0.304684	0.0764046	-0.143894	0.0864792	0.169029	0.0344315	-0.113815	-0.321182	0.0497246		1.65602	-0.236122	-0.232895	-0.568214	-0.0537567	-0.199787	-0.427849	-0.484997	-0.42482	-0.190727	-0.259834
		1.66626	-0.373478	-0.302357	-0.0864105	-0.115173	0.0356598	0.178677	0.0641861	-0.0756607	-0.362965	0.0285759		1.66626	-0.172916	-0.207096	-0.549419	-0.0160522	-0.215012	-0.449974	-0.474827	-0.549164	-0.187691	-0.188438
		1.6765	-0.363083	-0.316963	-0.0862465	-0.0788536	-0.11937	0.109631	0.0410919	-0.0361557	-0.255165	0.0769272		1.6765	-0.157051	-0.253551	-0.5112	-0.0383759	-0.277821	-0.453415	-0.446167	-0.554436	-0.209339	-0.143734
		1.68674	-0.447308	-0.437698	-0.103626	-0.127811	-0.215073	-0.00315857	0.0899467	-0.10775	-0.180908	0.0853195		1.68674	-0.263126	-0.352806	-0.526054	-0.133972	-0.196259	-0.444992	-0.429779	-0.453224	-0.155361	-0.23674
		1.69698	-0.560364	-0.42028	-0.0907593	-0.165211	-0.226181	-0.0465469	0.0761566	-0.0475006	-0.233501	0.148087		1.69698	-0.278004	-0.329956	-0.560371	-0.154312	-0.190559	-0.332718	-0.535172	-0.466972	-0.149765	-0.163013
		1.70722	-0.533638	-0.401039	-0.0509224	-0.234432	-0.249763	-0.0438385	0.048317	-0.00785446	-0.187321	0.162926		1.70722	-0.256794	-0.219662	-0.558311	-0.161892	-0.160103	-0.286919	-0.532738	-0.422565	-0.210075	-0.248486
		1.71746	-0.507805	-0.424786	-0.0600281	-0.108849	-0.231594	0.00234222	0.0708389	0.0316658	-0.038475	0.169113		1.71746	-0.185841	-0.210709	-0.603668	-0.175507	-0.10479	-0.279228	-0.593452	-0.360878	-0.156792	-0.264725
		1.7277	-0.549358	-0.270313	-0.175446	-0.138149	-0.162834	-0.000389099	0.0984955	0.01408	0.110107	0.156097		1.7277	-0.17498	-0.27248	-0.59642	-0.244244	-0.0965767	-0.270992	-0.609787	-0.455322	-0.211422	-0.190109
		1.73794	-0.481457	-0.233849	-0.168438	-0.163288	-0.117989	0.0201759	0.129547	-0.0431633	0.0348244	0.0937347		1.73794	-0.283154	-0.320354	-0.513798	-0.318439	-0.165134	-0.193542	-0.702171	-0.485687	-0.241154	-0.127014
		1.74818	-0.483032	-0.194519	-0.191315	-0.216232	-0.177822	0.0765152	0.116886	-0.121769	-0.0590973	0.11652		1.74818	-0.246113	-0.292625	-0.407547	-0.376099	-0.149002	-0.249641	-0.639038	-0.53392	-0.180355	-0.130859
		1.75842	-0.430355	-0.197063	-0.0905838	-0.180969	-0.18309	0.162369	0.169506	-0.133366	-0.0886078	0.108398		1.75842	-0.233856	-0.357334	-0.420624	-0.308903	-0.123173	-0.262398	-0.630707	-0.518044	-0.290768	-0.206192
		1.76866	-0.364815	-0.206932	0.0420952	-0.0595169	-0.178429	0.193466	0.248852	-0.0938835	-0.12035	0.0786934		1.76866	-0.236649	-0.324707	-0.442894	-0.329056	-0.20005	-0.241989	-0.544304	-0.380173	-0.318855	-0.129517
		1.7789	-0.394356	-0.15604	-0.00203705	-0.0134811	-0.20977	0.101295	0.255566	-0.0721397	-0.150715	0.119286		1.7789	-0.287048	-0.233513	-0.527161	-0.279434	-0.155037	-0.307732	-0.572197	-0.391537	-0.298897	0.247829
		1.78914	-0.307522	-0.196301	-0.0357819	0.0280991	-0.264782	0.115829	0.283684	-0.0563965	-0.223392	0.18071		1.78914	-0.345341	-0.157101	-0.588123	-0.11491	-0.202042	-0.3717	-0.602547	-0.392048	-0.322098	0.329773
		1.79938	-0.32856	-0.179882	-0.0051918	0.0753708	-0.21059	0.092083	0.315315	-0.163826	-0.170265	0.0959778		1.79938	-0.193611	-0.0876579	-0.63726	-0.110893	-0.275627	-0.351562	-0.617638	-0.469654	-0.30685	0.199001
		1.80962	-0.368996	-0.170822	0.0880623	-0.0259476	-0.202736	0.0668564	0.225952	-0.14045	-0.158638	0.0816498		1.80962	-0.0847015	-0.147072	-0.464169	-0.17411	-0.252922	-0.33601	-0.637764	-0.541241	-0.168148	0.00315475
		1.81986	-0.418373	-0.141212	0.138432	-0.0679207	-0.203392	0.0259781	0.12447	-0.0497437	-0.149605	0.13073		1.81986	-0.0706825	-0.284012	-0.305286	-0.174492	-0.198967	-0.352779	-0.5961	-0.583878	-0.183231	-0.112072
		1.8301	-0.33979	-0.152344	0.00293732	-0.205917	-0.172291	0.0237732	0.151566	-0.0340195	-0.171371	0.0500717		1.8301	-0.173504	-0.300201	-0.305542	-0.124043	-0.211803	-0.365917	-0.571949	-0.420433	-0.164669	-0.199802
		1.84034	-0.288734	-0.128971	-0.106438	-0.195499	-0.219498	0.0935707	0.194889	-0.018177	-0.243698	0.0275879		1.84034	-0.099762	-0.254517	-0.231773	-0.00363159	-0.182217	-0.460274	-0.518234	-0.44957	-0.170654	-0.289219
		1.85058	-0.257179	-0.204502	-0.184952	-0.201698	-0.256428	0.0269928	0.245323	-0.00700378	-0.204121	0.00370026		1.85058	-0.0973396	-0.249535	-0.222916	-0.0480576	-0.32309	-0.480778	-0.532158	-0.433117	-0.183838	-0.371902
		1.86082	-0.304802	-0.199074	-0.217026	-0.195786	-0.206955	0.00904083	0.311783	-0.0944214	-0.169762	-0.0441284		1.86082	-0.161259	-0.316589	-0.265114	-0.102551	-0.424892	-0.429756	-0.617115	-0.471752	-0.216595	-0.430244
		1.87106	-0.371239	-0.340446	-0.170513	-0.215038	-0.126801	0.0054512	0.231915	-0.161049	-0.14666	0.0891113		1.87106	-0.285332	-0.184074	-0.304501	-0.0798302	-0.369827	-0.350014	-0.606567	-0.534924	-0.171581	-0.437157
		1.8813	-0.466484	-0.349152	-0.239479	-0.0959015	-0.111168	0.0545807	0.23531	-0.179192	-0.0979843	0.117306		1.8813	-0.335209	-0.16169	-0.246696	-0.0208931	-0.293644	-0.32951	-0.525169	-0.569481	-0.164669	-0.357563
		1.89154	-0.413582	-0.347649	-0.179298	-0.200218	-0.0765038	0.0422516	0.270012	-0.28326	-0.171417	0.0407372		1.89154	-0.217525	-0.200588	-0.243084	0.0481071	-0.199348	-0.258724	-0.569645	-0.488583	-0.157913	-0.251286
		1.90178	-0.414845	-0.320667	-0.131092	-0.19178	-0.12196	0.0222015	0.229374	-0.214355	-0.205963	-0.0475616		1.90178	-0.229042	-0.193161	-0.272217	0.104778	-0.111588	-0.269966	-0.500519	-0.376717	-0.130611	-0.235168
		1.91202	-0.385128	-0.229996	-0.148842	-0.190933	-0.167381	-0.0498962	0.166992	-0.15062	-0.242767	0.0435867		1.91202	-0.340302	0.0274963	-0.405556	0.105865	-0.122871	-0.243671	-0.504822	-0.37685	-0.105614	-0.377995
		1.92226	-0.434647	-0.133606	-0.208649	-0.162716	-0.152668	-0.0315514	0.128139	-0.120651	-0.213753	0.052887		1.92226	-0.275356	-0.0392113	-0.399796	0.102249	-0.186665	-0.258331	-0.613457	-0.366146	-0.100548	-0.531013
		1.9325	-0.371666	-0.139565	-0.198742	-0.0431633	-0.0361061	0.0446129	0.136379	-0.0432129	-0.140259	0.0538864		1.9325	-0.235718	-0.189693	-0.314133	0.102718	-0.208561	-0.361519	-0.497311	-0.36982	-0.0348167	-0.508816
		1.94274	-0.27005	-0.231358	-0.0986176	0.044838	0.00279236	0.145641	0.13694	-0.0685806	-0.0445786	-0.001297		1.94274	-0.297848	-0.272686	-0.211945	0.111313	-0.149265	-0.286785	-0.49234	-0.469547	-0.0762405	-0.393661
		1.95298	-0.252171	-0.225136	-0.0448418	0.0151215	-0.0190353	0.112038	0.0707932	-0.0595169	-0.0739212	-0.0686264		1.95298	-0.300247	-0.265579	-0.285118	0.126011	-0.174469	-0.237209	-0.452892	-0.476631	-0.216133	-0.313847
		1.96322	-0.302357	-0.0902748	-0.00816345	-0.122318	-0.127277	0.147324	0.0935707	-0.0163269	-0.11441	-0.0527		1.96322	-0.26849	-0.188572	-0.345055	0.221115	-0.260338	-0.287254	-0.467247	-0.390381	-0.18211	-0.255672
		1.97346	-0.236019	-0.101776	0.0797195	-0.165695	-0.209888	0.0731125	0.0886574	0.00498962	-0.194736	-0.056778		1.97346	-0.244171	-0.206978	-0.382271	0.213776	-0.265923	-0.298779	-0.40918	-0.37307	-0.140434	-0.236065
		1.9837	-0.16143	-0.092968	0.0497398	-0.170822	-0.177155	0.0101852	0.124493	-0.0492668	-0.271294	0.0599289		1.9837	-0.158604	-0.220028	-0.339966	0.117344	-0.265556	-0.232712	-0.390179	-0.384789	-0.0667953	-0.173275
		1.99394	-0.220787	-0.0553818	-0.0362015	-0.176949	-0.247475	-0.0994797	0.205723	-0.0760994	-0.301323	0.0169067		1.99394	-0.0890312	-0.283154	-0.355499	-0.00272369	-0.245804	-0.17057	-0.406021	-0.335152	-0.0937996	-0.108757
		2.00418	-0.214085	0.00220871	-0.143021	-0.196308	-0.172813	-0.127312	0.285019	-0.0744781	-0.21373	0.0324287		2.00418	0.0142174	-0.210968	-0.359112	0.0158234	-0.254623	-0.168648	-0.472744	-0.368675	-0.123055	-0.212414
		2.01442	-0.259037	-0.0853729	-0.199898	-0.195656	-0.133812	-0.0523682	0.3307	-0.0928574	-0.196308	-0.0305977		2.01442	-0.0298309	-0.142582	-0.267059	0.113384	-0.224907	-0.165382	-0.435837	-0.311428	-0.200397	-0.304596
		2.02466	-0.326225	-0.113522	-0.233517	-0.184387	-0.0438881	0.0206528	0.362186	-0.0891304	-0.195618	-0.0406837		2.02466	-0.166851	-0.101177	-0.264793	0.0576553	-0.180061	-0.290314	-0.248352	-0.249474	-0.254982	-0.269466
		2.0349	-0.390659	-0.00527954	-0.195854	-0.162422	0.0116158	0.0418816	0.343662	-0.0223007	-0.257439	-0.0271416		2.0349	-0.15625	-0.117222	-0.227291	0.0536995	-0.165661	-0.21804	-0.314789	-0.124603	-0.251213	-0.251263
		2.04514	-0.310322	-0.0567055	-0.0174713	-0.128742	-0.0505867	0.0545311	0.198738	0.00100708	-0.132927	0.0818634		2.04514	-0.077549	-0.187939	-0.328308	0.0746307	-0.208908	-0.155106	-0.370422	-0.0230255	-0.161892	-0.287922
		2.05538	-0.308548	0.0378265	0.0220566	-0.0392303	0.00256348	0.024189	0.168568	-0.0543556	-0.120338	0.0213661		2.05538	-0.0511703	-0.0747757	-0.257721	0.103218	-0.0771217	-0.158627	-0.4011	-0.0952301	-0.228397	-0.227459
		2.06562	-0.25531	-0.0421715	0.00231934	-0.0158272	0.0870514	0.0120201	0.208359	-0.08535	-0.0965538	0.0291634		2.06562	-0.0155029	-0.0681801	-0.363308	0.0715904	-0.00339127	-0.157707	-0.352844	-0.178795	-0.328533	-0.230782
		2.07586	-0.202366	0.0351257	-0.0810089	-0.0492058	0.12001	0.0961685	0.175053	-0.00601959	-0.11322	0.0558891		2.07586	-0.0265274	-0.0596199	-0.340431	0.0771828	-0.00817108	-0.181763	-0.347202	-0.184265	-0.232998	-0.191681
		2.0861	-0.20742	0.386181	-0.107822	-0.150787	0.0791855	0.0670471	0.183205	0.0489769	-0.12817	0.0764275		2.0861	0.00160599	-0.0733185	-0.332626	0.0628319	0.0689583	-0.216301	-0.371201	-0.16021	-0.190025	-0.291164
		2.09634	-0.174042	0.33659	-0.0986176	-0.0616493	0.0373878	0.048317	0.23259	-0.0291786	-0.198956	0.0218544		2.09634	-0.0390587	-0.00732422	-0.343578	0.159153	-0.00427246	-0.242931	-0.472027	-0.209728	-0.134617	-0.191696
		2.10658	-0.229843	0.199402	-0.039753	0.0565338	-0.0732269	0.160851	0.356476	0.106079	-0.241287	-0.0267105		2.10658	-0.124424	-0.037941	-0.250561	0.126141	-0.12587	-0.239498	-0.512772	-0.279346	-0.0836067	-0.106113
		2.11682	-0.251812	0.103512	-0.0616646	-0.00627899	-0.0919304	0.176079	0.392109	0.0748444	-0.233349	0.0513458		2.11682	-0.134785	-0.0745697	-0.215488	0.118309	-0.093586	-0.223198	-0.478451	-0.252789	-0.11684	-0.0829277
		2.12706	-0.182884	0.033287	-0.0930176	-0.0714951	-0.0911179	0.11845	0.265175	0.0690269	-0.257915	-0.00322723		2.12706	-0.208885	-0.0801163	-0.184853	0.134892	-0.0524902	-0.179249	-0.411018	-0.205643	-0.124805	-0.167137
		2.1373	-0.15876	0.0329552	-0.10714	-0.147697	-0.069397	0.136261	0.23407	0.11002	-0.151764	0.0541496		2.1373	-0.293652	-0.125462	-0.195198	0.112049	0.0423508	-0.186142	-0.31646	-0.250141	-0.0603752	-0.3419
		2.14754	-0.121994	0.00228119	0.0203285	-0.163277	-0.0709381	0.208439	0.210098	0.0496216	-0.0502777	0.145233		2.14754	-0.273258	-0.119667	-0.207512	0.0837479	0.0842972	-0.216278	-0.287693	-0.26783	-0.0757751	-0.271709
		2.15778	-0.0219765	0.00125504	-0.0117645	-0.175865	-0.00489807	0.21067	0.266151	-0.00382233	-0.127884	0.146061		2.15778	-0.264305	-0.127869	-0.27298	0.107235	-0.00744629	-0.323444	-0.245132	-0.250538	-0.123745	-0.137417
		2.16802	-0.0162926	0.0478325	-0.0809784	-0.266396	-0.0133476	0.144402	0.261559	0.0108757	-0.0986176	0.0744629		2.16802	-0.240891	-0.0957794	-0.265209	0.0944557	0.0227852	-0.34948	-0.183685	-0.275391	-0.100594	-0.0658913
		2.17826	-0.136765	0.0819969	-0.145691	-0.203964	-0.00719452	0.0878143	0.237194	0.00999451	-0.0413589	0.0369949		2.17826	-0.271614	-0.0459137	-0.248295	0.111969	0.0857658	-0.327354	-0.237686	-0.375122	-0.109165	-0.130955
		2.1885	-0.238342	0.177197	-0.0938034	-0.240311	-0.0561829	0.08078	0.219147	0.0964699	-0.053566	0.0392723		2.1885	-0.166233	-0.109329	-0.197357	0.21965	-0.021904	-0.277813	-0.21928	-0.360806	0.0164452	-0.155502
		2.19874	-0.240334	0.21397	-0.0588264	-0.164612	-0.0123138	0.174431	0.259621	-0.00637436	-0.039135	0.0285301		2.19874	-0.165504	-0.040596	-0.141281	0.23373	-0.0753479	-0.230415	-0.24963	-0.361553	0.0196533	-0.130501
		2.20898	-0.231262	0.23468	-0.151058	-0.0825348	0.0125923	0.184551	0.291473	0.1092	-0.0404205	0.136356		2.20898	-0.255257	-0.0965996	-0.168102	0.156528	-0.0431137	-0.157875	-0.316017	-0.243752	-0.117962	-0.0989609
		2.21922	-0.224457	0.15741	-0.164982	-0.0955658	0.0237503	0.115623	0.266041	0.198799	-0.0628586	0.301281		2.21922	-0.308338	-0.094326	-0.194969	0.101311	-0.118607	-0.114449	-0.395638	-0.15239	-0.233086	-0.0757599
		2.22946	-0.249588	0.0790253	-0.165195	-0.123329	0.0106621	0.131573	0.161091	0.117523	-0.0764694	0.153473		2.22946	-0.294201	-0.0124626	-0.273903	0.000770569	-0.111668	-0.0909958	-0.412613	-0.21109	-0.332085	-0.188786
		2.2397	-0.268303	-0.0515556	-0.113213	-0.0859222	-0.0665283	0.11076	0.154678	0.003582	-0.0253143	0.00743103		2.2397	-0.234467	-0.0175323	-0.319035	0.0588493	-0.0589066	-0.0989037	-0.407227	-0.301033	-0.306614	-0.212303
		2.24994	-0.21064	-0.0930405	-0.112259	-0.0787201	-0.0207291	0.106659	0.0900078	-0.0712814	-0.0754471	-0.0358772		2.24994	-0.0291023	0.0328369	-0.327721	0.0576897	-0.0475578	-0.0952797	-0.301712	-0.237568	-0.258034	-0.245102
		2.26018	-0.126213	-0.102722	-0.0185585	-0.060051	-0.0539398	0.153557	0.146706	-0.125355	-0.0620804	0.00416183		2.26018	0.0546532	-0.0854797	-0.358185	-0.0199852	-0.0824356	-0.102669	-0.158794	-0.237541	-0.186745	-0.336258
		2.27042	-0.0841331	-0.0735474	0.129738	-0.100502	-0.0874138	0.226894	0.175957	-0.07481	-0.080452	0.0403557		2.27042	0.0549393	-0.083107	-0.411861	0.0525398	-0.0596352	-0.0422554	-0.128418	-0.244038	-0.234955	-0.314514
		2.28066	-0.0576363	-0.0696259	0.0628738	-0.11264	-0.0490379	0.230984	0.195461	-0.143211	-0.0367737	0.00416183		2.28066	0.0200691	-0.125462	-0.387016	0.0853844	0.0208549	-0.0197105	-0.147549	-0.226681	-0.295597	-0.227921
		2.2909	0.00152969	0.0197067	0.0601921	-0.0413742	-0.0976982	0.155979	0.198093	-0.0666733	-0.044117	-0.0417404		2.2909	-0.0116501	-0.204807	-0.367241	0.107128	-0.0267792	-0.111618	-0.180046	-0.189011	-0.31673	-0.13427
		2.30114	0.00230408	0.0666275	0.0326309	-0.0360832	-0.0850868	0.14315	0.151337	-0.00396729	-0.147743	-0.0691528		2.30114	-0.0122375	-0.228767	-0.410038	0.0598526	-0.00265503	-0.110847	-0.299007	-0.250561	-0.242271	-0.102669
		2.31138	-0.0768051	0.141899	0.0512009	-0.15379	0.00730896	0.108818	0.246895	-0.0698051	-0.0742378	-0.0348511		2.31138	-0.0396309	-0.14859	-0.300797	0.00379944	0.0540581	-0.102844	-0.320808	-0.313633	-0.199619	-0.0579033
		2.32162	-0.19165	0.137463	0.055603	-0.253494	-0.0985718	0.113621	0.267082	0.00408173	0.0610275	0.0650444		2.32162	-0.0956459	-0.0402832	-0.258556	0.00452423	0.0191383	-0.0389023	-0.347214	-0.298492	-0.131836	0.0193787
		2.33186	-0.278889	0.032608	0.0220833	-0.191921	-0.130077	0.259964	0.218872	0.00257874	0.0404968	0.0899582		2.33186	-0.129906	-0.0854874	-0.238617	0.00475311	0.0016861	-0.0466499	-0.433105	-0.374348	-0.0991173	0.0764999
		2.3421	-0.231331	0.0174561	-0.0794029	-0.145348	-0.0329208	0.268234	0.263298	0.00799179	-0.0246964	0.127785		2.3421	-0.12764	-0.0609703	-0.261585	0.0770721	-0.130814	-0.0292702	-0.358646	-0.416534	-0.0964813	0.087532
		2.35234	-0.167191	0.127251	-0.133331	-0.149071	-0.0992966	0.186577	0.307957	0.0379143	0.0163345	0.120438		2.35234	-0.168007	0.000816345	-0.235516	0.168938	-0.170666	0.0222282	-0.305908	-0.329891	-0.175014	0.0430756
		2.36258	-0.0664101	0.190094	-0.0703888	-0.184219	-0.123116	0.270096	0.279919	0.0561752	-0.0163727	0.179058		2.36258	-0.116795	0.0425987	-0.219017	0.236576	-0.279289	-0.01231	-0.323921	-0.315468	-0.233189	-0.012928
		2.37282	-0.126133	0.0885544	-0.12027	-0.239273	-0.0954094	0.283352	0.279583	0.0124512	0.0503845	0.159149		2.37282	0.014431	-0.0367966	-0.298134	0.129074	-0.224442	-0.0610733	-0.376575	-0.296822	-0.154572	-0.0811157
		2.38306	-0.103516	0.0775604	-0.138351	-0.233517	-0.0920258	0.226799	0.189915	0.0160027	0.112156	0.121391		2.38306	0.0748558	-0.148838	-0.336987	0.154076	-0.169785	-0.0564728	-0.284512	-0.265106	-0.172394	-0.0330124
		2.3933	-0.0462379	0.110344	-0.0872231	-0.147598	-0.149044	0.268726	0.0659866	-0.0650978	0.0553284	0.170784		2.3933	0.0721397	-0.105232	-0.402561	0.0647392	-0.258904	-0.114544	-0.136692	-0.364891	-0.187439	0.0148239
		2.40354	-0.0848961	0.156265	-0.139114	-0.190063	-0.0266724	0.259533	0.055687	-0.0563469	-0.0547371	0.146214		2.40354	0.0349464	-0.165184	-0.407093	-0.0348015	-0.174156	-0.152794	-0.14402	-0.356155	-0.144131	-0.0319786
		2.41378	-0.113213	0.110321	-0.128551	-0.148163	-0.0176277	0.238281	0.184612	0.00114822	-0.0966034	0.188667		2.41378	0.00786209	-0.157768	-0.364391	0.0465469	-0.179821	-0.193733	-0.125534	-0.320045	-0.172501	0.00333023
		2.42402	-0.0760994	0.0587769	-0.111195	-0.138744	0.0455055	0.167969	0.233749	0.0403786	-0.151573	0.172318		2.42402	-0.120419	-0.00662231	-0.352135	0.0416603	-0.192696	-0.157516	-0.0698395	-0.390038	-0.156792	0.0476456
		2.43426	-0.0647278	0.116688	-0.0773621	-0.112553	0.0267563	0.092186	0.195042	0.0444794	-0.0653839	0.14687		2.43426	-0.255211	-0.0718536	-0.334614	-0.0834541	-0.186996	-0.0939064	-0.143188	-0.374573	-0.187569	0.00166321
		2.4445	-0.0736313	0.157108	-0.0942307	-0.139137	0.0558662	0.0250244	0.212864	0.103241	-0.0793304	0.114334		2.4445	-0.16877	-0.182098	-0.349655	-0.0752144	-0.225609	-0.11161	-0.127617	-0.355728	-0.125771	-0.0682755
		2.45474	-0.14748	0.192169	-0.0753746	-0.207062	0.0556755	0.048008	0.193657	0.11924	-0.050827	0.275364		2.45474	-0.0582619	-0.224964	-0.307732	-0.00588226	-0.347679	-0.149281	-0.10659	-0.341862	-0.151672	-0.105324
		2.46498	-0.0851364	0.204807	-0.00992584	-0.16626	-0.0439034	0.0327873	0.169926	0.131229	-0.0506973	0.261227		2.46498	-0.103622	-0.190609	-0.293152	0.0690384	-0.352806	-0.185005	-0.129875	-0.28997	-0.243336	-0.120178
		2.47522	-0.0721321	0.134125	0.0376358	-0.168999	-0.0940895	0.000728607	0.138168	0.0928535	-0.0730209	0.258865		2.47522	-0.119167	-0.148876	-0.3302	0.072998	-0.26651	-0.12006	-0.229755	-0.257332	-0.212807	-0.0665588
		2.48546	-0.0953064	0.0830078	0.0197945	-0.118515	-0.0848732	-0.0765533	0.240021	0.0784683	-0.0947914	0.262074		2.48546	-0.0789719	-0.100845	-0.308365	0.0429573	-0.333721	-0.170311	-0.228947	-0.225868	-0.201481	-0.0136452
		2.4957	-0.0871506	0.08675	0.0486679	-0.12344	-0.0975075	0.0598221	0.146214	0.128822	0.00942993	0.235809		2.4957	-0.00296402	-0.149494	-0.324493	0.0716286	-0.314087	-0.235252	-0.258987	-0.274834	-0.227993	0.00700378
		2.50594	-0.131435	0.132767	0.0465698	-0.168175	-0.0715942	0.127495	0.12384	0.077095	-0.0252571	0.290066		2.50594	-0.0478325	-0.209206	-0.341732	0.0903053	-0.318962	-0.222954	-0.196758	-0.342316	-0.272934	0.0653572
		2.51618	-0.0528679	0.0958595	0.0816498	-0.231468	-0.0789261	0.19558	0.137604	-0.103195	0.0264053	0.251595		2.51618	0.0176849	-0.169197	-0.310665	0.0853615	-0.331226	-0.172943	-0.0520058	-0.288422	-0.337631	0.0977821
		2.52642	-0.11253	0.0377808	0.0500946	-0.166817	-0.0778275	0.197533	0.223427	-0.205574	0.052227	0.244362		2.52642	-0.0415878	-0.119621	-0.414951	0.0409317	-0.296909	-0.0640717	0.00370407	-0.394112	-0.187023	0.0824623
		2.53666	-0.130722	0.115566	-0.00585938	-0.173553	-0.0306473	0.0782776	0.2729	-0.178978	0.000267029	0.234825		2.53666	-0.0436859	-0.0229988	-0.444778	0.0853119	-0.279945	-0.0444336	-0.0798759	-0.510223	0.0235634	0.0975304
		2.5469	-0.0604591	0.0245247	0.0596199	-0.0804863	0.0045929	-0.0119629	0.203598	-0.19928	-0.0376549	0.176109		2.5469	-0.0358734	-0.131432	-0.358326	0.0773125	-0.239548	-0.0837173	-0.111992	-0.472839	-0.0116272	0.123421
		2.55714	-0.0517807	-0.000804901	0.048214	-0.0505066	-0.0108566	0.0267639	0.209076	-0.182457	-0.0684586	0.157646		2.55714	-0.149994	-0.248917	-0.347527	0.15522	-0.0841789	-0.0755692	-0.131195	-0.294464	0.0169601	0.0707245
		2.56738	-0.0754776	-0.0321579	0.0222092	-0.0451202	-0.00356293	0.0568542	0.21785	-0.1059	-0.0890579	0.0737724		2.56738	-0.186714	-0.293629	-0.40546	0.15778	-0.0948982	-0.0466652	-0.12043	-0.24337	-0.0719833	0.00642014
		2.57762	-0.145191	-0.0566177	-0.0120506	-0.0306091	0.0242844	0.137955	0.178009	-0.106972	-0.0295715	0.0183258		2.57762	-0.157341	-0.241798	-0.367027	0.0519447	0.0252571	-0.0496788	-0.0477715	-0.253422	-0.141373	-0.0264702
		2.58786	-0.112911	-0.0608788	-0.0493851	-0.0663452	0.0648079	0.181953	0.188976	-0.0615234	-0.0496483	0.132565		2.58786	-0.0636177	-0.0885658	-0.361496	-0.00525284	-0.0146713	-0.0625916	0.0508499	-0.224632	-0.170868	-0.0425262
		2.5981	-0.020443	-0.0323143	-0.141853	-0.21833	0.0174179	0.169044	0.286919	-0.0842056	-0.0468102	0.0467453		2.5981	-0.0764427	-0.0784073	-0.407257	-0.0469513	-0.120647	-0.173122	0.073204	-0.227314	-0.179512	-0.0317993
		2.60834	0.00327301	0.0806236	-0.108727	-0.215157	-0.0423393	0.122482	0.331478	-0.00282288	0.0143433	0.0713882		2.60834	-0.140945	-0.109402	-0.474659	-0.0330353	-0.166145	-0.204887	0.0458183	-0.25943	-0.0892334	-0.0197487
		2.61858	-0.0582542	0.133614	-0.0785789	-0.278099	-0.0733566	0.0562592	0.288071	0.0588684	0.0848427	0.145679		2.61858	-0.156513	-0.105148	-0.358231	-0.0477486	-0.160137	-0.21941	-0.00842285	-0.24411	-0.090271	0.0658455
		2.62882	-0.0415993	0.0565414	-0.0447693	-0.153465	-0.161777	0.0613976	0.256279	0.0159645	0.102524	0.157703		2.62882	-0.10236	-0.0702782	-0.255028	-0.103172	-0.11142	-0.259312	-0.0022583	-0.209991	-0.123055	0.0113907
		2.63906	-0.0394897	0.0129623	-0.0769234	-0.05476	-0.128349	0.0748215	0.289383	-0.0580978	0.0278625	0.0902214		2.63906	-0.0960503	0.00566864	-0.27116	-0.110954	-0.176914	-0.209015	-0.032692	-0.164444	-0.08741	-0.0246353
		2.6493	0.0253334	-0.00644684	-0.0384293	0.0197945	-0.0671463	0.0039978	0.305824	-0.154823	-0.0824165	0.213272		2.6493	-0.114258	-0.047081	-0.353924	-0.101677	-0.20892	-0.195652	-0.105244	-0.222954	-0.124126	-0.0331459
		2.65954	0.0113373	-0.00709152	-0.0674095	0.0466728	-0.0555115	0.0112915	0.315205	-0.162811	-0.120922	0.184708		2.65954	-0.216549	-0.0752373	-0.421078	-0.125748	-0.224716	-0.0596466	-0.101105	-0.210564	-0.161186	-0.0237274
		2.66978	0.015152	-0.000282288	-0.0542107	-0.0675278	-0.0768509	0.0508461	0.399189	-0.144547	-0.0347214	0.173798		2.66978	-0.26775	-0.0315971	-0.428406	-0.114887	-0.272026	-0.0305557	-0.118382	-0.223557	-0.207275	0.0532074
		2.68002	0.0236435	-0.00621033	0.04076	-0.171394	-0.0912514	0.0255013	0.383953	-0.127144	0.0336304	0.0934258		2.68002	-0.190956	0.0555191	-0.326523	-0.0321808	-0.33757	-0.00335312	-0.103241	-0.38306	-0.168213	0.0809135
		2.69026	-0.0224915	0.0658646	0.0092659	-0.175018	-0.126499	-0.0218811	0.423912	-0.175293	-0.0202255	0.100998		2.69026	-0.163284	0.0782318	-0.275928	0.00740051	-0.301105	-0.0637207	-0.166027	-0.429359	-0.157982	-0.0698624
		2.7005	-0.0471916	0.086525	-0.0324936	-0.253506	-0.103077	0.0213928	0.487831	-0.126808	-0.0653839	0.151909		2.7005	-0.0198517	0.0947418	-0.293999	-0.0499649	-0.230446	-0.0413971	-0.272289	-0.310165	-0.206524	-0.0586586
		2.71074	0.0192566	0.19101	-0.0370712	-0.358757	-0.190315	0.0550652	0.423874	-0.117981	-0.0995331	0.142181		2.71074	0.0658188	0.135666	-0.28437	-0.0447426	-0.183304	-0.129356	-0.25882	-0.197155	-0.160461	-0.013237
		2.72098	0.051693	0.146584	0.0712051	-0.412186	-0.309883	0.0897446	0.382915	-0.164814	-0.0654564	0.0824814		2.72098	0.00676346	-0.00754929	-0.273903	0.0323868	-0.158207	-0.202545	-0.225525	-0.193279	-0.100819	0.0589676
		2.73122	0.107327	0.102726	0.0773964	-0.379452	-0.268883	0.115528	0.269989	-0.135082	-0.0801773	0.0473633		2.73122	-0.089756	-0.0802574	-0.279861	0.0166817	0.00511932	-0.277096	-0.265541	-0.229198	-0.0538406	0.0414696
		2.74146	-0.00328445	0.14991	0.128273	-0.194847	-0.248238	0.0517731	0.270618	-0.0304565	-0.067791	0.0981483		2.74146	-0.0236893	-0.190109	-0.24921	-0.0558929	-0.0215683	-0.282684	-0.261147	-0.269978	-0.146645	-0.067955
		2.7517	0.0194702	0.127686	0.100212	-0.105568	-0.272316	0.0401764	0.26709	-0.0716553	-0.0701523	0.0384941		2.7517	-0.025135	-0.143227	-0.334328	0.0265923	-0.084671	-0.12973	-0.175514	-0.297218	-0.220234	-0.0517044
		2.76194	0.049057	0.118999	0.115971	-0.11507	-0.318405	-0.00309372	0.249756	-0.0379639	-0.0238113	0.0850105		2.76194	-0.0924187	-0.136715	-0.395828	0.0957184	-0.117413	-0.127346	-0.143536	-0.259575	-0.187069	-0.15834
		2.77218	0.0178146	0.128044	0.160591	-0.119671	-0.301594	-0.0162926	0.194172	-0.0897026	-0.110764	0.113228		2.77218	-0.0769768	-0.0848846	-0.39801	-0.0308342	-0.149433	-0.122372	-0.0680618	-0.315159	-0.18087	-0.211685
		2.78242	0.00698853	0.0805664	0.176125	-0.106926	-0.211441	0.0290451	0.132233	-0.105438	-0.182503	0.105125		2.78242	-0.0977211	-0.0530624	-0.380127	-0.0722237	-0.12775	-0.160439	-0.0749893	-0.344341	-0.180882	-0.102432
		2.79266	0.101486	0.0874672	0.0828171	-0.103065	-0.112003	0.154667	0.0918198	-0.133953	-0.134796	0.159866		2.79266	-0.197521	0.0204163	-0.351089	-0.0886612	-0.151711	-0.171383	-0.12606	-0.329811	-0.261955	-0.0651779
		2.8029	0.147141	0.0635185	0.0560417	-0.0822144	-0.0979843	0.11578	0.0752716	-0.148079	-0.0660133	0.08741		2.8029	-0.180893	0.0365829	-0.261101	-0.214664	-0.206772	-0.122959	-0.183407	-0.300247	-0.263756	0.00418854
		2.81314	0.126461	0.0208664	-0.0363312	-0.0595779	-0.0937195	0.135666	0.203506	-0.0445938	-0.126236	0.052433		2.81314	-0.23497	-0.0393944	-0.188988	-0.117485	-0.171009	-0.13818	-0.222092	-0.317162	-0.266773	0.0982819
		2.82338	0.153389	-0.00702667	-0.0755997	0.0242615	-0.0649643	0.164165	0.193027	-0.020752	-0.197445	-0.100777		2.82338	-0.221832	-0.0947647	-0.172821	-0.0540428	-0.194199	-0.0104599	-0.114647	-0.29892	-0.309067	0.188858
		2.83362	0.153294	0.0742722	-0.0441399	-0.10154	-0.0402412	0.211227	0.277023	-0.0208588	-0.24036	-0.13765		2.83362	-0.26757	-0.0170631	-0.249283	0.0830727	-0.299057	-0.0462112	-0.0687408	-0.172989	-0.252098	0.156944
		2.84386	0.153244	0.0527916	-0.0623093	-0.222477	0.110497	0.278286	0.309433	-0.0559196	-0.236069	-0.0510063		2.84386	-0.247398	0.0728455	-0.215897	0.162975	-0.28923	-0.0417175	-0.0653801	-0.201767	-0.195351	0.0872078
		2.8541	0.147133	0.108589	-0.061554	-0.19463	0.233307	0.229347	0.315289	-0.0835381	-0.15918	-0.0663147		2.8541	-0.179047	0.0449028	-0.203815	0.16412	-0.229939	-0.0483589	-0.121483	-0.285477	-0.0910912	0.0572357
		2.86434	0.280743	0.196388	0.0423737	-0.160545	0.184715	0.179916	0.272945	-0.0877724	-0.239334	-0.0444832		2.86434	-0.186604	0.0171814	-0.182861	0.0776825	-0.253445	-0.115829	-0.143925	-0.415333	-0.124233	0.109024
		2.87458	0.161774	0.262299	0.133934	-0.0966721	0.0795975	0.162487	0.250069	-0.0881042	-0.201675	0.0078125		2.87458	-0.230843	-0.111382	-0.298363	-0.0167046	-0.200588	-0.141438	-0.0841446	-0.455982	-0.197777	0.0168877
		2.88482	0.156288	0.191669	-0.0505066	-0.0932159	0.0463409	0.208057	0.297775	-0.0797615	-0.0920868	0.0311203		2.88482	-0.162403	-0.170532	-0.354641	0.0363998	-0.163826	-0.0609207	-0.0501213	-0.354416	-0.162354	-0.080555
		2.89506	0.245888	0.104073	-0.409813	-0.0360565	0.011982	0.170341	0.305141	-0.0664902	-0.130211	-0.0525894		2.89506	-0.236862	-0.0849152	-0.296124	0.0905228	-0.213081	-0.0380325	-0.0712204	-0.293961	-0.197762	-0.0538979
		2.9053	0.248486	0.130421	-0.342388	0.00244522	-0.0688629	0.289764	0.369564	0.0254211	-0.139507	-0.0593872		2.9053	-0.231487	-0.00806427	-0.274235	0.101463	-0.107151	-0.0063591	-0.136082	-0.281292	-0.132816	-0.0410843
		2.91554	0.30368	0.0781937	-0.256248	-0.0428314	-0.119133	0.270859	0.470165	0.0479126	-0.058815	-0.0948868		2.91554	-0.121586	0.0422554	-0.321167	-0.00382996	-0.132759	-0.0189934	-0.145298	-0.259666	-0.0309753	0.0463104
		2.92578	0.251595	0.0541267	-0.13549	-0.106083	-0.0756912	0.176651	0.531345	-0.0404549	0.0847015	0.100388		2.92578	-0.0626717	0.00495148	-0.396973	0.0444489	-0.137096	-0.0121994	-0.137821	-0.245613	-0.0735817	0.131256
		2.93602	0.140038	0.0691681	-0.125809	-0.0660515	-0.0265083	0.0726738	0.555649	-0.161095	0.0460281	0.147858		2.93602	0.0336113	-0.0125809	-0.388042	0.126736	-0.049057	-0.0513382	-0.0446701	-0.259644	-0.111427	0.0796967
		2.94626	0.0238457	0.0842476	-0.0916328	0.0386391	0.0010643	0.103893	0.487141	-0.152847	-0.0206909	0.246254		2.94626	-0.00646973	-0.0501785	-0.32576	0.112564	-0.0780869	-0.0889854	-0.0350533	-0.279743	-0.204426	-0.0524826
		2.9565	0.1092	0.191383	-0.0209999	0.0403938	-0.0445938	0.0741272	0.599724	-0.0773392	-0.0544167	0.289787		2.9565	-0.0421906	-0.106865	-0.229755	0.0718422	-0.101418	-0.0878029	-0.0581894	-0.353256	-0.211731	-0.0981255
		2.96674	0.159088	0.0254784	0.0377312	0.0316925	-0.114761	-0.012558	0.570992	-0.126991	-0.0576706	0.257412		2.96674	-0.0373993	-0.0283318	-0.304932	0.0496063	-0.179619	-0.147491	-0.014061	-0.303787	-0.302643	-0.000579834
		2.97698	0.0329285	-0.121063	0.0546265	-0.00234604	-0.0111923	0.100784	0.513733	-0.0617676	-0.16391	0.287739		2.97698	-0.029808	0.142963	-0.26342	0.0466766	-0.181656	-0.182453	-0.0206375	-0.311859	-0.295837	0.0545197
		2.98722	0.121147	-0.163406	0.0474358	0.0365295	0.0403786	0.177555	0.540104	0.0309982	-0.247711	0.25555		2.98722	-0.0898438	0.054985	-0.260838	-0.0341339	-0.125641	-0.117096	-0.00520325	-0.330338	-0.290958	0.170559
		2.99746	0.1782	-0.0854912	0.0609779	0.0733986	-0.0569305	0.147705	0.460701	0.0999107	-0.152786	0.21463		2.99746	-0.0604553	0.0320282	-0.356728	-0.0566063	-0.070816	-0.0655823	-0.023407	-0.337654	-0.354843	0.1903
		3.0077	0.176945	-0.0858269	-0.0369186	0.0644493	-0.0212402	0.152451	0.499565	0.0600014	0.0359344	0.232536		3.0077	-0.0742035	-0.0593338	-0.363235	0.0220604	-0.0728188	-0.0215836	-0.0776939	-0.344246	-0.355595	0.117844
		3.01794	0.119343	-0.129997	-0.071331	0.0950966	0.0785751	0.134544	0.535908	-0.0176048	0.0826263	0.210838		3.01794	0.0251694	-0.0584755	-0.443642	-0.00293732	-0.0428505	0.0483589	-0.0251122	-0.202126	-0.409904	-0.0343399
		3.02818	0.104885	-0.186714	-0.0957336	0.104084	0.0739365	0.174934	0.500397	-0.0586128	-0.023304	0.252998		3.02818	0.0591354	-0.00105667	-0.382095	0.0661316	-0.0453796	0.0829849	-0.0719604	-0.132973	-0.393875	-0.00806427
		3.03842	0.168816	-0.147598	-0.141403	0.0515823	-0.0116768	0.185196	0.549904	-0.0473213	-0.0217285	0.261036		3.03842	0.0338478	0.0189972	-0.352875	0.0713272	-0.0649376	0.0573082	-0.186867	-0.113266	-0.241199	0.0368195
		3.04866	0.189072	-0.108894	-0.160355	0.0523605	-0.0951462	0.103668	0.615395	-0.0940399	0.0325737	0.303711		3.04866	0.053257	0.048954	-0.346844	-0.0108795	-0.0688629	0.0839157	-0.191658	-0.117691	-0.234085	0.0187798
		3.0589	0.226727	-0.0270309	-0.229012	0.0701942	-0.109932	0.0311203	0.574043	-0.143501	0.0906143	0.413925		3.0589	0.0365562	0.0091629	-0.286858	-0.0383301	-0.133171	0.0584526	-0.0941086	-0.108307	-0.183266	0.00707245
		3.06914	0.197235	-0.108109	-0.292011	0.0201492	-0.0853004	-0.0626297	0.564247	-0.102112	0.0639343	0.450138		3.06914	-0.065834	-0.0367813	-0.319901	0.0331802	-0.124043	0.0204887	-0.0633888	-0.169426	-0.0788116	0.0242386
		3.07938	0.184025	-0.217598	-0.404297	-0.0829773	-0.0331039	-0.090641	0.556686	-0.0654182	0.0351334	0.436264		3.07938	-0.0662155	-0.0144424	-0.431553	-0.00923157	-0.149384	-0.0186844	-0.14278	-0.192459	-0.137749	0.0177307
		3.08962	0.172356	-0.261375	-0.409351	-0.0975342	-0.197762	-0.0948296	0.533642	-0.0632477	0.0117188	0.438622		3.08962	-0.0237617	0.00609589	-0.362808	-0.0192795	-0.0116882	-0.0806389	-0.236027	-0.176445	-0.144249	0.0911789
		3.09986	0.194984	-0.278839	-0.390396	-0.111946	-0.226494	-0.122105	0.516754	-0.141106	-0.00438309	0.370937		3.09986	-0.0445061	-0.0366745	-0.346809	-0.0737	-0.0208664	-0.116951	-0.365704	-0.160736	-0.162834	0.183662
		3.1101	0.150673	-0.327702	-0.357384	-0.276741	-0.182625	-0.107273	0.405029	-0.102039	-0.0225754	0.406399		3.1101	-0.054081	-0.115124	-0.305813	-0.126701	-0.0318375	-0.0818558	-0.269848	-0.155979	-0.122791	0.136772
		3.12034	0.0876007	-0.364372	-0.345741	-0.255951	-0.204964	0.00901794	0.337044	-0.0749931	0.0532455	0.374165		3.12034	-0.08181	-0.178593	-0.272995	-0.127396	-0.0134773	-0.0719948	-0.154415	-0.19223	-0.0848351	0.0604248
		3.13058	0.077095	-0.337849	-0.275154	-0.288498	-0.207554	0.0689659	0.367313	-0.169716	0.108067	0.335327		3.13058	-0.100391	-0.11541	-0.300102	-0.118916	0.0139389	0.0132751	-0.156822	-0.2911	-0.13221	0.00432205
		3.14082	0.00528336	-0.406273	-0.165886	-0.344311	-0.227234	0.0373268	0.305252	-0.15406	0.0414886	0.297394		3.14082	-0.0569267	-0.0724487	-0.370152	-0.0828094	-0.0426445	0.0729485	-0.0976715	-0.277321	-0.235706	-0.00387955
		3.15106	-0.0717735	-0.328621	-0.15313	-0.483414	-0.233837	-0.065773	0.231674	-0.231762	-0.14233	0.311401		3.15106	0.0123444	-0.0584297	-0.356834	0.0112381	-0.0130577	0.0294533	-0.145538	-0.211983	-0.253242	-0.0038681
		3.1613	-0.0295029	-0.353035	-0.22084	-0.492496	-0.19339	-0.265141	0.215057	-0.262947	-0.236889	0.290264		3.1613	0.132641	-0.00166321	-0.290386	0.0287476	-0.0142899	0.0120583	-0.0982132	-0.105682	-0.231247	-0.121384
		3.17154	0.0161781	-0.321407	-0.285027	-0.438568	-0.167007	-0.346455	0.231709	-0.24992	-0.121056	0.259285		3.17154	0.0341034	0.0466042	-0.316841	0.0591354	-0.051384	0.000564575	-0.104469	-0.135487	-0.274315	-0.14418
		3.18178	0.0560913	-0.325363	-0.281273	-0.379097	-0.103683	-0.352631	0.206024	-0.212227	-0.17094	0.249321		3.18178	0.047596	0.110397	-0.273544	0.0996666	-0.150352	0.0536118	-0.1012	-0.128681	-0.227242	-0.0436363
		3.19202	0.0391045	-0.275581	-0.206417	-0.40049	-0.19828	-0.241505	0.234951	-0.297184	-0.321159	0.188286		3.19202	-0.0296898	0.0705643	-0.295132	0.116772	-0.135166	-0.032917	-0.0400124	-0.046524	-0.266655	0.0537949
		3.20226	0.0171814	-0.294529	-0.267204	-0.426098	-0.172745	-0.169262	0.227753	-0.338661	-0.331158	0.0609207		3.20226	-0.0146217	0.0127144	-0.306267	0.0123672	-0.130074	-0.0043335	-3.05176e-05	-0.102692	-0.234955	0.0646286
		3.2125	0.0809097	-0.314541	-0.337086	-0.384483	-0.229759	-0.197144	0.120884	-0.283417	-0.359245	-0.00814819		3.2125	0.0426598	0.0180893	-0.30381	-0.0317993	-0.118523	0.0217361	0.0120468	-0.153881	-0.159748	0.0361137
		3.22274	0.163857	-0.34053	-0.374924	-0.352306	-0.368591	-0.172386	0.16003	-0.313324	-0.250397	-0.0506744		3.22274	0.0763588	0.0481529	-0.3246	0.0297165	-0.120266	0.0379181	-0.00483322	-0.172344	-0.124626	-0.0129623
		3.23298	0.147167	-0.360699	-0.394028	-0.349625	-0.423882	-0.168335	0.227097	-0.345573	-0.328598	-0.0624847		3.23298	0.0934448	0.0214996	-0.260845	0.0491943	-0.0695534	0.116833	-0.0702057	-0.14135	-0.0836525	-0.0273399
		3.24322	0.246529	-0.207993	-0.348148	-0.348564	-0.439034	-0.167007	0.234497	-0.3792	-0.32415	-0.081192		3.24322	0.0181122	0.0235252	-0.183407	0.095623	0.0192947	0.105865	-0.00564194	-0.18169	-0.0368767	-0.0606689
		3.25346	0.236469	-0.00291824	-0.309525	-0.378475	-0.395866	-0.164383	0.25354	-0.4608	-0.345646	-0.0816689		3.25346	-0.071804	-0.0555801	-0.329216	0.0821762	0.0196075	0.11874	-0.0587158	-0.175636	-0.0614471	-0.00297165
		3.2637	0.206699	0.0201035	-0.183949	-0.373348	-0.328133	-0.0862083	0.186329	-0.454556	-0.325745	-0.0868034		3.2637	-0.103455	0.0203781	-0.314251	0.108807	0.0668602	0.0306702	0.0339813	-0.0989494	-0.105171	0.0560837
		3.27394	0.254398	0.0522766	-0.18539	-0.266823	-0.265991	0.00711823	0.310116	-0.488579	-0.282139	-0.0471458		3.27394	-0.0639725	0.127453	-0.265541	0.095932	0.0770988	0.0743217	0.0890198	-0.0328712	-0.216633	0.0756187
		3.28418	0.284733	0.0302849	-0.242149	-0.181622	-0.198494	0.0308075	0.334564	-0.414715	-0.355015	0.0039711		3.28418	-0.0249062	0.185341	-0.281754	0.0713272	0.1558	0.0873032	0.087532	-0.00790787	-0.261955	0.0566635
		3.29442	0.171284	-0.0868988	-0.174793	-0.212059	-0.233921	-0.0601006	0.30542	-0.354572	-0.407253	-0.0112152		3.29442	-0.0355415	0.114456	-0.373108	0.147301	0.220768	0.120697	-0.0192108	-0.0573578	-0.176746	0.118725
		3.30466	0.136868	-0.156563	-0.0972939	-0.325211	-0.342903	-0.0911179	0.265652	-0.320503	-0.335522	-0.0224304		3.30466	-0.0122375	-0.0189133	-0.467735	0.172894	0.229996	0.122566	-0.000366211	-0.167019	-0.155266	0.128048
		3.3149	0.0709343	-0.160618	-0.0956154	-0.31551	-0.501476	-0.0529633	0.308281	-0.300201	-0.305828	-0.0662766		3.3149	-0.12981	-0.0451889	-0.502342	0.144371	0.233849	0.155109	-0.0036087	-0.192017	-0.194317	0.160641
		3.32514	0.0530777	-0.16827	-0.0987625	-0.20594	-0.336586	-0.0429955	0.236824	-0.389999	-0.286671	-0.0514679		3.32514	-0.184708	-0.0118103	-0.430996	0.157589	0.149376	0.162895	-0.0198898	-0.183182	-0.194374	0.249283
		3.33538	0.120319	-0.121197	-0.145264	-0.227135	-0.225006	-0.0718536	0.218681	-0.441429	-0.322472	-0.0276642		3.33538	-0.0221405	0.00128174	-0.37566	0.144283	0.1357	0.207489	-0.00713348	-0.161018	-0.233833	0.167126
		3.34562	0.247707	-0.0568733	-0.122089	-0.188526	-0.238857	-0.0313148	0.128082	-0.490891	-0.342476	0.14513		3.34562	0.124748	0.0294037	-0.366989	0.0470352	0.158867	0.143856	-0.0711288	-0.227394	-0.200706	0.0659561
		3.35586	0.255756	-0.0928955	-0.143501	-0.167389	-0.160927	-0.0223961	0.138226	-0.471016	-0.336777	0.113167		3.35586	0.178989	-0.059494	-0.305286	-0.000419617	0.105659	0.0412788	-0.0945168	-0.224369	-0.164883	0.0471916
		3.3661	0.264969	-0.121841	-0.0936928	-0.171921	-0.135632	0.0554619	0.239494	-0.458305	-0.380344	0.0248337		3.3661	0.00151825	-0.0220947	-0.198143	-0.00312805	0.0487633	0.0263863	-0.117569	-0.224453	-0.147423	-0.00695419
		3.37634	0.247971	0.004879	-0.119789	-0.130028	-0.185905	0.0614319	0.330383	-0.437016	-0.332317	-0.145638		3.37634	-0.08498	0.0156479	-0.204952	0.0674896	0.0213318	0.0916328	-0.162285	-0.188393	-0.130707	-0.0630531
		3.38658	0.1861	0.135387	-0.110596	-0.136169	-0.141151	0.0870972	0.283272	-0.401005	-0.321049	-0.0968094		3.38658	-0.0685272	-0.0411186	-0.366035	0.0615997	0.0561066	0.145992	-0.205048	-0.0935135	-0.125938	-0.0406113
		3.39682	0.271873	0.0648079	-0.176186	-0.204384	-0.0978165	0.131454	0.145878	-0.449833	-0.43959	-0.0237427		3.39682	0.0271988	-0.0696945	-0.43222	0.0713997	0.00661087	0.157673	-0.12838	-0.0618057	-0.158436	0.086277
		3.40706	0.340443	0.0407486	-0.195259	-0.132595	-0.110134	0.139656	0.248852	-0.385948	-0.346886	-0.0471687		3.40706	0.0746078	-0.0213699	-0.368706	0.136963	0.0396576	0.137836	-0.073925	-0.0704689	-0.139816	0.0509682
		3.4173	0.386459	0.0136528	-0.147209	-0.119289	-0.0402145	0.129951	0.32827	-0.202843	-0.323433	-0.109692		3.4173	0.0712242	0.0238113	-0.452797	0.188	0.0890083	0.142178	-0.0925598	-0.159184	-0.177162	0.110729
		3.42754	0.386696	0.100056	-0.138683	-0.0957336	-0.0558014	0.127235	0.269142	-0.0806046	-0.303207	-0.0329132		3.42754	-0.0901299	-0.02528	-0.47496	0.225361	0.14344	0.149879	-0.121014	-0.246208	-0.241287	0.124081
		3.43778	0.410583	0.208694	-0.0787926	-0.0363693	-0.0358276	0.0301971	0.250046	-0.0554047	-0.321335	0.0886841		3.43778	0.232037	-0.099556	-0.325409	0.173393	0.112144	0.0676804	-0.0309753	-0.226036	-0.210888	0.123661
		3.44802	0.557819	0.244061	-0.049469	0.0822372	0.00678635	0.109756	0.279202	-0.131054	-0.214275	0.0437546		3.44802	0.455254	-0.111786	-0.21394	0.0337906	-0.0127945	0.0527573	-0.140366	-0.255352	-0.191837	0.0888062
		3.45826	0.445156	0.201359	-0.035614	0.0517426	-0.00769806	0.199047	0.291981	-0.109421	-0.209126	-0.00509644		3.45826	0.377625	-0.0960655	-0.0969582	-0.0137405	0.0145988	0.0100555	-0.208488	-0.185577	-0.174038	0.0327034
		3.4685	0.453117	0.100628	-0.0393829	-0.0290108	-0.0324936	0.22102	0.26981	-0.179428	-0.255524	0.0505753		3.4685	0.294155	0.0554276	-0.108997	0.0148239	0.00358582	-0.0202255	-0.157745	-0.199928	-0.182755	0.0651283
		3.47874	0.419266	0.116615	-0.0461273	-0.0238495	-0.0279999	0.25386	0.239304	-0.244423	-0.20121	0.0842628		3.47874	0.0928497	0.0857658	-0.149265	-0.0219879	0.03442	-0.113255	-0.158459	-0.21278	-0.21862	0.0812683
		3.48898	0.456657	0.210632	0.0411415	-0.00261688	-0.00263977	0.164715	0.284306	-0.222454	-0.245819	0.111561		3.48898	-0.00576019	0.0816765	-0.226315	0.0183754	0.0122604	-0.101536	-0.191322	-0.0878258	-0.206261	0.122253
		3.49922	0.398163	0.184254	0.0255966	0.00175476	0.00711823	0.193562	0.363022	-0.180111	-0.141632	0.139313		3.49922	-0.0719604	0.0127487	-0.249329	0.0710793	0.0238266	-0.0971489	-0.168365	-0.0915604	-0.176033	0.156563
		3.50946	0.383476	0.261513	-0.00773621	0.0514641	0.0814972	0.215973	0.397591	-0.109253	-0.00818634	0.104488		3.50946	-0.0592041	-0.0124741	-0.267593	0.0578079	0.0628319	-0.0696945	-0.117668	-0.164192	-0.245541	0.0772896
		3.5197	0.336365	0.161926	0.0437622	0.113407	0.0295067	0.195724	0.308495	-0.114056	-0.0863647	0.130875		3.5197	-0.0923538	-0.0528984	-0.327721	0.0372353	0.0531273	-0.0668221	-0.106747	-0.163467	-0.26857	0.00159073
		3.52994	0.368919	0.155296	0.0867653	0.138741	-0.00841141	0.144543	0.319057	-0.107021	-0.168819	0.178413		3.52994	-0.0775261	0.00730133	-0.365623	0.0177307	0.0289841	-0.0663109	-0.0561409	-0.180618	-0.176987	-0.0226173
		3.54018	0.376381	0.0957298	0.0990295	0.148563	-0.00709152	0.18132	0.283375	-0.0442848	-0.240906	0.13348		3.54018	-0.047821	0.174065	-0.39138	0.0154915	0.11998	0.00587463	-0.0999985	-0.303226	-0.185089	0.0210686
		3.55042	0.32877	0.0166931	0.0926895	0.0792084	0.148064	0.159611	0.311474	-0.0177956	-0.26004	0.171093		3.55042	-0.0221901	0.267952	-0.271526	0.0806274	0.182922	0.0780258	-0.15575	-0.281662	-0.226505	0.0244789
		3.56066	0.315968	0.108963	0.100197	-0.0091629	0.0552559	0.172127	0.394112	0.0260887	-0.211926	0.175316		3.56066	0.0126915	0.195473	-0.272789	0.110992	0.122375	0.0711517	-0.191704	-0.223343	-0.250118	0.000850677
		3.5709	0.270737	0.271027	0.187283	-0.0432663	0.0513458	0.165096	0.490654	0.115028	-0.100868	0.115734		3.5709	0.0530663	0.0985794	-0.328976	0.00864792	0.0589523	0.136299	-0.154167	-0.163609	-0.240021	0.0792923
		3.58114	0.293198	0.311237	0.190693	0.0191727	0.0564613	0.155178	0.466759	0.0711823	-0.050148	0.124435		3.58114	0.0526505	0.164619	-0.319893	0.0232773	0.0177536	0.165218	-0.140221	-0.127678	-0.174278	0.102776
		3.59138	0.262527	0.195793	0.177341	0.0957146	0.000537872	0.237503	0.523987	0.0574646	-0.00279999	0.278286		3.59138	0.0103531	0.217899	-0.30109	-0.0492172	-0.0221558	0.244038	-0.209846	-0.139721	-0.206882	0.0486069
		3.60162	0.314323	0.138264	0.176743	-0.0157928	-0.0705795	0.327888	0.619919	-0.0260201	-0.0668869	0.24815		3.60162	-0.0548439	0.17733	-0.304119	-0.127903	-0.0488358	0.186935	-0.1535	-0.14159	-0.16964	0.0321808
		3.61186	0.314766	0.175896	0.0795746	-0.0249329	-0.102936	0.293331	0.649086	0.0530167	-0.070137	0.277248		3.61186	-0.0489655	0.153145	-0.291737	-0.235779	-0.0114975	0.127632	-0.10051	-0.129978	-0.12471	0.00806427
		3.6221	0.260368	0.234619	0.109665	-0.030014	0.033226	0.175659	0.494423	0.108627	-0.0820236	0.317947		3.6221	-0.101215	0.0761452	-0.286404	-0.204197	0.00738525	0.196213	-0.148232	-0.150784	-0.245968	0.0374374
		3.63234	0.255527	0.241867	0.0576324	0.0871315	0.0233536	0.0755844	0.514332	0.0720406	-0.0121536	0.423996		3.63234	-0.148445	0.0394974	-0.304977	-0.132839	0.0101738	0.103012	-0.0963974	-0.262085	-0.188747	0.0368996
		3.64258	0.337296	0.255314	0.047451	0.136391	0.00991058	0.00138855	0.52599	0.011879	-0.00284576	0.347984		3.64258	-0.0905113	0.14518	-0.350937	-0.0657501	-0.0576782	0.0286522	-0.0159912	-0.295288	-0.156132	0.023407
		3.65282	0.388397	0.125557	0.0735168	0.120502	-0.0847664	-0.0267944	0.431923	-0.00249863	-0.0432205	0.366905		3.65282	-0.076088	0.0530396	-0.384529	-0.0334816	-0.157276	0.0238571	-0.083786	-0.29203	-0.139275	-0.0222282
		3.66306	0.449936	0.104443	0.00508118	0.0534096	-0.128311	0.0437889	0.43446	-0.0578842	-0.153408	0.335079		3.66306	-0.0530167	0.0567741	-0.336021	-0.0488358	-0.0999031	-0.0323372	-0.145298	-0.354687	-0.213329	-0.0929756
		3.6733	0.392132	0.104313	-0.112194	-0.0500793	-0.213203	0.058857	0.366241	-0.0557365	-0.0918579	0.466087		3.6733	-0.0666428	0.0858459	-0.330822	-0.0589218	0.00750351	-0.105301	-0.171574	-0.364964	-0.217907	-0.0021286
		3.68354	0.340874	0.0614471	-0.0258865	-0.0371628	-0.281044	0.0149879	0.422348	0.00653839	0.0807571	0.442589		3.68354	-0.0821419	0.0696487	-0.219971	-0.0103531	-0.0210915	-0.122578	-0.127903	-0.439232	-0.183025	0.0706367
		3.69378	0.316696	0.00715637	0.0770607	0.205532	-0.163765	0.0426331	0.480202	-0.0441895	0.172428	0.411087		3.69378	-0.0948601	0.0564651	-0.342216	-0.0966377	-0.116688	-0.0259552	-0.0807343	-0.388485	-0.22456	0.0509338
		3.70402	0.319653	0.054039	0.0788269	0.628437	-0.0528297	0.000171661	0.4314	-0.0628891	0.163162	0.320774		3.70402	-0.111633	0.010498	-0.367863	-0.111565	-0.0902557	-0.0799484	-0.135532	-0.295677	-0.314369	0.0673828
		3.71426	0.269058	0.0691566	0.107033	0.484116	-0.0145149	-0.0338898	0.351849	-0.036972	0.0191574	0.320797		3.71426	-0.0604477	-0.0206146	-0.324314	-0.11031	-0.0317993	-0.0600662	-0.148445	-0.238266	-0.385578	-0.0583801
		3.7245	0.178089	0.0693855	0.0415001	0.294651	-0.0274048	-0.0194397	0.29567	-0.0173416	-0.0582161	0.286976		3.7245	-0.0143585	-0.0603752	-0.321404	-0.0875168	0.0263138	-0.0516586	-0.103195	-0.269516	-0.342697	0.00275803
		3.73474	0.24765	0.0366516	0.0576172	0.209656	0.00928879	-0.0160179	0.375443	0.0623856	-0.0365372	0.328831		3.73474	-0.0503922	-0.0876007	-0.274506	-0.124008	0.0998573	0.0565376	-0.153152	-0.254734	-0.386101	0.109467
		3.74498	0.310459	0.14687	0.123466	0.124794	0.0202789	-0.0141487	0.299324	0.0642204	-4.19617e-05	0.363388		3.74498	-0.0751877	-0.172844	-0.284344	-0.0612564	0.159748	0.127644	-0.22916	-0.213188	-0.40485	-0.0270538
		3.75522	0.348557	0.149883	0.0198021	0.0352287	0.00968552	-0.0873642	0.339394	0.0545807	0.0960236	0.34309		3.75522	-0.119347	-0.160759	-0.330559	-0.0297852	0.186974	0.19912	-0.202282	-0.107796	-0.310452	-0.164921
		3.76546	0.31319	0.172165	-0.0459518	0.0502739	-0.0387878	-0.0261879	0.410419	0.0125084	0.153103	0.418415		3.76546	-0.0597878	-0.104969	-0.345531	-0.00251007	0.20388	0.178368	-0.204926	-0.153271	-0.279266	-0.243156
		3.7757	0.392822	0.121037	-0.00151062	0.0576782	-0.00952148	0.0589523	0.37294	-0.0260468	0.105553	0.333817		3.7757	-0.0120811	-0.0525398	-0.30481	-0.0276947	0.201912	0.165543	-0.235214	-0.135891	-0.289864	-0.166908
		3.78594	0.470867	0.0696335	0.0315475	0.116791	-0.135391	0.0127106	0.365524	-0.0726318	0.0301971	0.22612		3.78594	0.0406418	-0.0782661	-0.201469	-0.102337	0.217636	0.224609	-0.132164	-0.104778	-0.323433	-0.0582504
		3.79618	0.472431	0.0258255	0.0942612	0.115662	-0.141304	-0.00612259	0.380379	-0.0699463	-0.0123367	0.156311		3.79618	-0.0321312	-0.0102196	-0.158421	-0.135643	0.234146	0.190125	-0.110214	-0.0791626	-0.341194	0.092205
		3.80642	0.359898	0.102463	0.112015	0.026207	-0.0711288	0.00391388	0.33392	-0.102085	-0.0194397	0.13538		3.80642	-0.049511	0.0637703	-0.164135	-0.149483	0.190933	0.114113	-0.0820923	-0.219837	-0.355904	0.0642624
		3.81666	0.335533	0.109631	0.0589027	-0.0398712	-0.14357	0.0233536	0.286274	-0.0765915	0.122299	0.241032		3.81666	-0.0510521	0.043541	-0.210064	-0.0596924	0.221676	0.0513229	-0.0186386	-0.326817	-0.299137	0.0677757
		3.8269	0.353844	0.112095	0.119331	-0.089283	-0.221985	0.0530624	0.210884	-0.0817719	0.260437	0.287537		3.8269	-0.0383072	0.0961838	-0.207798	-0.0206528	0.206573	0.175255	-0.0326462	-0.358788	-0.295918	0.0250282
		3.83714	0.365913	0.161892	0.0821724	-0.0238991	-0.259979	0.145142	0.257317	-0.0722504	0.157314	0.227528		3.83714	-0.0847969	0.0588837	-0.193924	-0.0116997	0.235851	0.142773	-0.056797	-0.279991	-0.260239	-0.0490112
		3.84738	0.298992	0.140846	0.037159	0.0194702	-0.308197	0.186745	0.291973	-0.058815	0.0259323	0.240021		3.84738	-0.0744629	0.0370445	-0.203854	-0.0376129	0.278969	0.109776	-0.103455	-0.256054	-0.160782	0.00157928
		3.85762	0.202972	0.0982094	-0.0515785	-0.0316086	-0.230999	0.0838547	0.284306	-0.127445	-0.0590744	0.154701		3.85762	-0.122078	0.0546379	-0.218708	0.0906143	0.362999	0.0331955	-0.146729	-0.309601	-0.17329	0.0714226
		3.86786	0.241501	0.119049	-0.0444603	-0.110161	-0.212868	0.0433578	0.213104	-0.0635338	0.0038681	0.175777		3.86786	-0.158257	0.0808868	-0.151569	0.12656	0.266689	0.0542336	-0.138268	-0.288719	-0.17379	0.00642014
		3.8781	0.273026	0.120262	-0.0339127	0.113026	-0.217636	0.109566	0.247768	-0.12413	-0.0267601	0.226322		3.8781	-0.103107	0.186771	-0.143368	0.116745	0.283829	0.118225	-0.0775146	-0.224358	-0.245842	0.020752
		3.88834	0.300301	0.194794	-0.00881577	0.243153	-0.154991	0.120628	0.363045	-0.119148	-0.0873032	0.203743		3.88834	0.0237389	0.308578	-0.168674	0.149841	0.381836	0.181049	0.00744629	-0.0999756	-0.261444	0.053421
		3.89858	0.297981	0.169365	-0.0770531	0.162628	-0.209557	0.0745354	0.336605	-0.107273	-0.0745392	0.269047		3.89858	0.185127	0.394073	-0.163689	0.189194	0.425571	0.169357	0.0336838	-0.166256	-0.29052	0.104485
		3.90882	0.197495	0.0767975	-0.0460968	0.045433	-0.263351	0.0856056	0.25362	-0.0254974	-0.0707474	0.313271		3.90882	0.222977	0.357681	-0.115242	0.230057	0.454418	0.163883	0.0626488	-0.115341	-0.286358	0.184113
		3.91906	0.180058	0.00753784	-0.0686836	0.00919342	-0.280922	0.116661	0.221672	0.0226288	-0.0781708	0.304379		3.91906	0.192459	0.282425	0.0193443	0.34333	0.4342	0.216095	0.0239296	-0.114758	-0.233917	0.194183
		3.9293	0.146118	-0.0308609	-0.12693	0.0358734	-0.396	0.167614	0.317291	-0.0245209	-0.107952	0.200836		3.9293	0.222748	0.224751	0.0572624	0.403828	0.457661	0.276463	0.149662	-0.0161591	-0.156204	0.284927
		3.93954	0.123779	-0.021286	-0.11562	0.0418091	-0.404247	0.133362	0.291649	-0.0398979	-0.0753593	0.199833		3.93954	0.298412	0.186714	0.0185814	0.416176	0.525398	0.320751	0.234764	0.0253372	-0.206154	0.25565
		3.94978	0.149406	-0.00291824	-0.161896	0.0280914	-0.442394	0.0770493	0.210632	-0.0636215	-0.0545464	0.142673		3.94978	0.375099	0.254837	0.00619125	0.466125	0.523289	0.375694	0.205666	0.0722504	-0.210899	0.255497
		3.96002	0.116005	0.0911751	-0.0811996	-0.0498505	-0.454563	0.022068	0.176804	-0.121151	-0.079628	0.0278053		3.96002	0.377758	0.315079	0.0538177	0.445396	0.63221	0.394363	0.218098	0.0470734	-0.10746	0.305573
		3.97026	0.26527	0.104347	-0.0863419	-0.045166	-0.505157	0.0811386	0.090519	-0.0939102	-0.242775	0.00944519		3.97026	0.382004	0.307388	0.122135	0.461159	0.65226	0.359375	0.220116	0.0730667	0.085537	0.423519
		3.9805	0.349991	0.0137634	-0.0756226	-0.0226936	-0.453434	0.0225372	0.12397	-0.00114059	-0.316662	-0.0733566		3.9805	0.378433	0.318306	0.16362	0.462467	0.759155	0.25248	0.325138	0.164516	0.122578	0.434097
		3.99074	0.399891	0.0704651	-0.135918	0.0386848	-0.472244	-0.0791168	0.219994	-0.0724983	-0.352356	-0.0105247		3.99074	0.328796	0.283321	0.18631	0.50071	0.705997	0.200432	0.35173	0.194828	0.131744	0.348228
		4.00098	0.321663	0.11002	-0.21841	0.0391769	-0.554333	-0.152725	0.21072	-0.159142	-0.327797	-0.0683899		4.00098	0.303501	0.316292	0.0858231	0.519173	0.721043	0.292118	0.299828	0.198692	0.207226	0.247925
		4.01122	0.285233	0.0613823	-0.187408	0.0884666	-0.543114	-0.135979	0.290955	-0.274605	-0.189682	-0.0637131		4.01122	0.352413	0.379818	-0.0734634	0.520557	0.714008	0.392517	0.266918	0.253693	0.106613	0.339169
		4.02146	0.231865	0.055603	-0.202293	0.0917587	-0.463638	-0.00461197	0.254478	-0.33606	-0.0614357	-0.04422		4.02146	0.397095	0.462112	0.0160866	0.522072	0.7001	0.441925	0.268787	0.311192	0.0754662	0.442894
		4.0317	0.180069	-0.00165558	-0.110382	0.137882	-0.443741	0.0583687	0.21513	-0.300537	-0.0156364	0.026001		4.0317	0.388725	0.359829	0.0799484	0.498543	0.724083	0.49456	0.337807	0.276691	0.159496	0.465782
		4.04194	0.14444	-0.00608826	-0.160965	0.0787659	-0.537151	0.0450439	0.235428	-0.232716	-0.0645256	0.149849		4.04194	0.310059	0.452122	0.130219	0.569145	0.795681	0.468262	0.370819	0.294464	0.259178	0.439495
		4.05218	0.165668	0.0422859	-0.0561829	0.0656662	-0.617085	0.0494766	0.161472	-0.223701	-0.115246	-0.0046463		4.05218	0.357658	0.418648	0.211987	0.605328	0.866119	0.472374	0.362286	0.256069	0.3246	0.453918
		4.06242	0.177898	0.0393295	0.0374374	-0.0485764	-0.594872	0.091568	0.131218	-0.207409	-0.120731	-0.0710602		4.06242	0.327072	0.439842	0.159233	0.546631	0.917587	0.489029	0.448902	0.193184	0.411789	0.364693
		4.07266	0.164688	0.0106239	0.134052	-0.0451279	-0.53701	0.0817337	0.11908	-0.253304	-0.090538	-0.111145		4.07266	0.294647	0.478668	0.141922	0.474754	0.939041	0.525909	0.488251	0.224503	0.276741	0.292843
		4.0829	0.137367	0.105316	0.0203896	0.011982	-0.623329	0.101486	-0.0182495	-0.282879	-0.109451	-0.0740471		4.0829	0.257309	0.617188	0.151951	0.520214	0.867161	0.527351	0.456863	0.235001	0.255447	0.311104
		4.09314	0.185623	0.0165749	-0.035965	-0.00342941	-0.652164	0.107101	0.0520744	-0.269493	-0.114319	0.0102921		4.09314	0.195305	0.548393	0.242668	0.535065	0.930397	0.490578	0.449486	0.23288	0.271313	0.309093
		4.10338	0.191536	0.0553894	-0.0992165	-0.00326157	-0.723492	0.084938	0.0500488	-0.170036	-0.0811691	-0.00747299		4.10338	0.216526	0.460903	0.240952	0.593048	0.905243	0.641975	0.467533	0.219769	0.271088	0.379379
		4.11362	0.205959	-0.0158997	-0.113029	0.0854073	-0.701508	-0.00230789	0.104107	-0.129768	-0.16943	-0.00965118		4.11362	0.258057	0.445908	0.284538	0.604599	0.86879	0.657074	0.473103	0.198326	0.192173	0.416882
		4.12386	0.18021	-0.107353	0.00888443	0.0993385	-0.838219	-0.0152931	0.18578	-0.164074	-0.230846	0.0123634		4.12386	0.324528	0.435226	0.24609	0.525364	0.846153	0.733719	0.490276	0.303921	0.25565	0.495667
		4.1341	0.171928	-0.121342	0.00196075	0.132835	-0.838585	0.055603	0.149956	-0.269806	-0.208469	-0.0177078		4.1341	0.296326	0.450867	0.269062	0.571888	0.831062	0.814873	0.555691	0.276558	0.2299	0.499184
		4.14434	0.173058	-0.0236931	0.0253334	0.00522614	-0.813408	0.0828896	0.0600624	-0.340542	-0.238056	-0.0479889		4.14434	0.306232	0.343529	0.231068	0.515064	0.876076	0.682503	0.405106	0.210434	0.277168	0.533382
		4.15458	0.178391	0.0432892	0.0891953	-0.0112953	-0.771351	0.13081	0.0930939	-0.309605	-0.237404	-0.0389442		4.15458	0.255306	0.380295	0.139744	0.337372	0.776428	0.678413	0.341789	0.172218	0.309078	0.578922
		4.16482	0.163879	0.0538979	0.10603	-0.0309334	-0.778851	0.14389	0.128822	-0.295937	-0.249931	-0.0421486		4.16482	0.179737	0.328751	0.200314	0.394974	0.749893	0.630173	0.322811	0.163063	0.326927	0.521049
		4.17506	0.278049	0.00653839	0.0620499	0.0100899	-0.698792	0.146011	0.225834	-0.217457	-0.257965	-0.070652		4.17506	0.191231	0.356255	0.169296	0.454292	0.652569	0.615875	0.290497	0.155361	0.264984	0.437443
		4.1853	0.306015	0.103477	0.0285416	-0.0307426	-0.679146	0.113907	0.222507	-0.249668	-0.223812	-0.0724754		4.1853	0.141556	0.388805	0.0562019	0.384193	0.690849	0.627632	0.35421	0.0707245	0.152096	0.403542
		4.19554	0.372509	0.11517	-0.0356636	-0.0790215	-0.741192	0.124924	0.220352	-0.198433	-0.290688	-0.0443802		4.19554	0.116199	0.357525	-0.0320969	0.456722	0.681217	0.640575	0.397366	0.0687675	0.199432	0.401489
		4.20578	0.312191	0.0685501	-0.0325851	-0.0380363	-0.7341	0.059967	0.177158	-0.166245	-0.30056	0.0765953		4.20578	0.114258	0.41283	0.00199509	0.363644	0.683388	0.67033	0.355824	0.228756	0.189407	0.455055
		4.21602	0.338593	0.137714	0.00192261	-0.0804138	-0.774834	0.133495	0.148979	-0.0999298	-0.326572	0.159172		4.21602	0.191624	0.38015	0.134483	0.391705	0.723156	0.601349	0.259296	0.244411	0.338215	0.470886
		4.22626	0.352825	-0.00368118	0.0168839	-0.0690804	-0.705761	0.208549	0.168648	-0.0767822	-0.251457	0.10088		4.22626	0.139339	0.319584	0.200958	0.382629	0.684181	0.468224	0.219719	0.208122	0.276871	0.384148
		4.2365	0.335777	-0.0750656	0.0894585	0.0551262	-0.713978	0.180687	0.18169	-0.0572624	-0.2444	0.0566292		4.2365	0.0709152	0.449093	0.115746	0.371845	0.712269	0.489933	0.17244	0.160805	0.194321	0.382656
		4.24674	0.398819	-0.0495605	0.187401	0.188187	-0.651848	0.148357	0.281528	-0.00864029	-0.20443	0.0306396		4.24674	0.106773	0.127083	-0.0269241	0.356239	0.751156	0.470215	0.157722	0.0285797	0.218052	0.305
		4.25698	0.475624	0.0667953	0.188793	0.234634	-0.625309	0.13813	0.283745	-0.0412331	-0.204239	0.0794067		4.25698	0.152916	-0.274937	0.0172539	0.344139	0.775734	0.455006	0.0974579	-0.0612335	0.177296	0.307926
		4.26722	0.474491	0.149742	0.149803	0.230103	-0.632629	0.219719	0.231686	-0.0222397	-0.166378	0.0551262		4.26722	0.125328	-0.222698	0.126953	0.290768	0.629074	0.372593	0.226849	-0.0347519	0.13166	0.322254
		4.27746	0.554195	0.17046	0.0842133	0.171055	-0.701374	0.196198	0.260582	-0.0202599	-0.154564	-0.0962906		4.27746	0.0561295	-0.0162277	0.145752	0.231594	0.528641	0.376408	0.242668	-0.0858002	0.194092	0.308651
		4.2877	0.559464	0.127354	0.0468063	0.18784	-0.751514	0.0694199	0.261513	-0.00897217	-0.0318146	-0.0917053		4.2877	0.210815	0.166733	0.121078	0.197594	0.441368	0.369709	0.145657	-0.0208931	0.263699	0.295265
		4.29794	0.526077	0.0415001	0.0313187	0.129906	-0.767105	0.0131531	0.258125	-0.00423813	-0.096199	-0.0656319		4.29794	0.292412	0.167046	0.127689	0.176247	0.481518	0.378426	0.0695534	-0.0394745	0.175468	0.314053
		4.30818	0.495651	0.0853577	0.0153427	0.149338	-0.857872	0.114826	0.295166	-0.0160065	-0.206409	0.0215836		4.30818	0.237053	0.18224	0.130852	0.184265	0.424259	0.316494	0.120251	-0.0634613	0.0800705	0.248249
		4.31842	0.545841	0.125778	-0.0170822	0.148922	-0.841564	0.171524	0.306469	-9.15527e-05	-0.183807	0.0466003		4.31842	0.273186	0.119598	0.150284	0.122757	0.467175	0.297245	0.112194	-0.0728188	0.0534363	0.315468
		4.32866	0.558666	0.143723	0.0188141	0.164871	-0.857529	0.194862	0.177303	0.0470924	-0.226746	0.0196114		4.32866	0.303753	0.148399	0.0899506	0.106136	0.604935	0.278145	0.0479774	-0.0385361	0.12706	0.287048
		4.3389	0.609055	0.244099	-0.0042038	0.209599	-0.851688	0.145702	0.176601	0.114708	-0.188789	0.0560188		4.3389	0.238544	0.101265	0.00570679	0.159653	0.505894	0.195518	-0.0194702	-0.161438	0.0959244	0.360554
		4.34914	0.583298	0.176754	-0.0268173	0.285473	-0.875721	0.105537	0.181583	0.107826	-0.163757	0.170593		4.34914	0.269241	0.11409	-0.12986	0.0458908	0.538269	0.165073	-0.0690536	-0.164921	0.103729	0.335274
		4.35938	0.373329	0.19429	0.0476151	0.345886	-0.820633	0.0859299	0.28339	0.0289116	-0.0833702	0.16798		4.35938	0.190586	0.0982933	-0.0999756	0.0310135	0.535091	0.222198	-0.101509	-0.185471	0.166447	0.189728
		4.36962	0.372463	0.203266	0.0968971	0.316109	-0.751957	0.274673	0.270142	-0.0748482	-0.139603	0.0404015		4.36962	0.104919	0.120647	0.0132027	-0.00123215	0.420113	0.173393	-0.100834	-0.230305	0.0893898	0.160973
		4.37986	0.333054	0.182705	0.152172	0.203232	-0.770851	0.288239	0.220303	0.029686	-0.181805	-0.0340195		4.37986	0.206226	0.0394669	-0.0435028	0.105793	0.326973	0.153336	-0.0480957	-0.257881	0.0287933	0.121052
		4.3901	0.260906	0.269276	0.155151	0.19101	-0.811405	0.158112	0.278988	0.0486298	-0.118942	0.00877762		4.3901	0.151878	-0.0497665	-0.113457	0.208099	0.309952	0.13636	-0.132698	-0.226288	0.0564499	0.0157204
		4.40034	0.221306	0.280743	0.122791	0.158707	-0.792202	0.117767	0.16256	0.0543404	-0.110909	0.0683823		4.40034	0.215858	0.0787201	-0.248463	0.207298	0.327057	0.06147	-0.176796	-0.176949	0.0516586	0.0141945
		4.41058	0.295582	0.199665	0.0917473	0.14172	-0.797829	0.178448	0.146488	0.0589676	0.00111008	0.115185		4.41058	0.0486794	0.155346	-0.198563	0.144943	0.35445	0.0609322	-0.248211	-0.291962	-0.121704	-0.0235977
		4.42082	0.407822	0.104027	0.112118	0.111179	-0.859398	0.201565	0.118668	0.0540543	0.0633774	0.132622		4.42082	0.015728	0.236687	-0.0872765	0.0815811	0.263794	0.0264091	-0.164158	-0.283154	-0.178757	-0.0361252
		4.43106	0.386314	0.10479	0.190868	0.144009	-0.847336	0.297989	0.211792	-0.0213814	0.0317612	0.246468		4.43106	-0.0278397	0.199921	-0.0716133	0.10918	0.211613	0.0780525	-0.227634	-0.287788	-0.278084	-0.0635223
		4.4413	0.433697	0.1632	0.308361	0.183453	-0.831924	0.172668	0.299053	-0.0144577	-0.0122757	0.312859		4.4413	-0.0159569	0.215904	-0.274712	0.134594	0.227791	0.063221	-0.300556	-0.273235	-0.301163	-0.0746536
		4.45154	0.350109	0.0963745	0.260406	0.229038	-0.917946	0.157921	0.285583	-0.0262222	0.00331879	0.31617		4.45154	0.113983	0.291115	-0.33733	0.0991058	0.227364	0.183884	-0.36195	-0.353924	-0.245968	-0.12838
		4.46178	0.325733	0.0798111	0.253643	0.23592	-0.833138	0.113419	0.250401	-0.101681	-0.035511	0.258747		4.46178	0.0787201	0.314182	-0.226276	0.0243378	0.301758	0.119656	-0.456032	-0.384396	-0.233334	-0.161488
		4.47202	0.323479	0.100483	0.305107	0.197941	-0.801201	0.219635	0.203972	-0.0787697	-0.0773392	0.302425		4.47202	0.0804977	0.264664	-0.196987	-0.0556526	0.284966	0.0911636	-0.42421	-0.405224	-0.340469	-0.0825005
		4.48226	0.386372	0.147587	0.283615	0.141277	-0.746555	0.130737	0.240593	-0.0899162	0.0616455	0.262123		4.48226	0.11414	0.0772324	-0.155418	-0.0185318	0.351269	0.0706367	-0.36195	-0.315922	-0.373512	-0.146683
		4.4925	0.42223	0.114826	0.228897	0.0156784	-0.707336	0.100975	0.281887	-0.0774803	0.144638	0.189358		4.4925	0.107616	0.130589	-0.124851	0.0782661	0.427422	0.0567741	-0.249165	-0.365536	-0.434883	-0.202545
		4.50274	0.302986	0.107349	0.178436	-0.054657	-0.76918	0.0167274	0.203979	0.0167656	0.0516472	0.0839844		4.50274	0.0866013	0.140686	-0.0958595	0.0968781	0.430351	0.0362091	-0.225002	-0.41135	-0.458939	-0.20446
		4.51298	0.114994	0.0966225	0.117149	-0.0381546	-0.725063	0.0269089	0.145714	0.0119743	-0.140842	-0.0100784		4.51298	-0.00548935	0.013176	-0.13229	0.0651779	0.42128	-0.0320015	-0.292725	-0.377041	-0.37426	-0.243767
		4.52322	0.121895	0.0689545	0.110783	0.00114822	-0.702248	0.0329399	0.149551	-0.0410881	-0.193703	-0.0408249		4.52322	-0.0979118	-0.0814819	-0.174576	0.0764465	0.297493	-0.0137711	-0.268665	-0.419815	-0.352516	-0.220734
		4.53346	0.204948	0.105492	0.0864792	0.00510788	-0.745361	-0.0890808	0.191559	-0.121292	-0.190586	-0.0650368		4.53346	-0.085743	-0.042038	-0.180584	0.0314331	0.384193	0.119789	-0.263802	-0.398903	-0.346222	-0.201599
		4.5437	0.145035	0.105801	0.128609	-0.0719757	-0.817295	-0.0197029	0.313583	-0.0913811	-0.202339	-0.0979042		4.5437	-0.112885	-0.0193291	-0.227493	0.0235252	0.464592	0.195591	-0.281853	-0.364025	-0.271351	-0.180489
		4.55394	0.18454	0.168816	0.193588	-0.0810318	-0.884026	0.0484276	0.292889	-0.165756	-0.185143	-0.100941		4.55394	-0.176041	-0.0218315	-0.254448	0.00685883	0.39138	0.163612	-0.293629	-0.337227	-0.199596	-0.237671
		4.56418	0.265087	0.0864792	0.194889	-0.118061	-0.902637	0.125446	0.318661	-0.184959	-0.218018	-0.102722		4.56418	-0.13102	-0.195972	-0.229088	-0.00551605	0.327606	0.0553055	-0.164871	-0.290527	-0.178947	-0.303562
		4.57442	0.296749	0.0505104	0.171913	-0.0709152	-0.922531	0.0737953	0.294403	-0.0764084	-0.228329	-0.00337219		4.57442	-0.1674	-0.0991745	-0.179058	-0.0595856	0.309818	0.0425186	-0.130718	-0.258606	-0.210625	-0.27713
		4.58466	0.297466	-0.02808	0.144329	-0.117203	-0.853355	0.0275879	0.296024	-0.121136	-0.201221	-0.00687408		4.58466	-0.199455	-0.00251007	-0.155205	-0.0982132	0.301331	0.117119	-0.110119	-0.256737	-0.274101	-0.287514
		4.5949	0.281898	-0.0566826	0.0960388	0.013176	-0.871666	0.124016	0.252419	-0.191769	-0.110252	-0.120277		4.5949	-0.266987	-0.100224	-0.165527	-0.114624	0.267857	0.0419693	-0.0809364	-0.269112	-0.277695	-0.275284
		4.60514	0.252655	-0.0811996	0.0870857	0.118771	-1.29196	0.0111389	0.200668	-0.205082	-0.0379524	-0.15374		4.60514	-0.286858	-0.13023	-0.147644	-0.099308	0.184425	-0.0297394	-0.0743942	-0.283699	-0.17205	-0.221458
		4.61538	0.110329	-0.162132	0.18721	0.0291862	-1.24691	-0.0935287	0.182182	-0.242966	0.0266228	-0.0269012		4.61538	-0.292316	-0.182812	-0.164539	-0.102394	0.153	0.00608826	-0.0297699	-0.238815	-0.189655	-0.187641
		4.62562	0.143353	-0.195297	0.231472	0.016655	-1.24149	-0.0930634	0.196869	-0.26054	0.0409737	0.0754013		4.62562	-0.297203	-0.192745	-0.217476	-0.00414276	0.199265	0.0276413	0.00656509	-0.242622	-0.157585	-0.160378
		4.63586	0.117378	-0.145264	0.231033	-0.054821	-1.07618	-0.134846	0.182549	-0.285168	0.0326767	0.0592842		4.63586	-0.391609	-0.215736	-0.300137	-0.0293655	0.216446	0.0697327	0.0267563	-0.301773	-0.223404	-0.149303
		4.6461	0.173248	-0.200687	0.162941	0.0193748	-1.05167	-0.182114	0.209347	-0.296707	-0.0397797	0.0793381		4.6461	-0.48143	-0.199062	-0.310783	-0.173012	0.187439	0.0857773	-0.0559235	-0.28363	-0.181	-0.116318
		4.65634	0.107063	-0.269566	0.0567474	0.088623	-0.995773	0.0521545	0.257244	-0.305504	-0.128479	0.0554237		4.65634	-0.412827	-0.307693	-0.401836	-0.317566	0.156799	0.0208702	-0.116577	-0.284943	-0.101845	-0.0438385
		4.66658	0.0826645	-0.233192	-0.0274048	0.0546989	-0.977169	0.0145493	0.261154	-0.321217	-0.138412	0.166168		4.66658	-0.45623	-0.397793	-0.511066	-0.457329	0.123722	0.0677643	-0.126442	-0.383347	-0.0941353	-0.0789566
		4.67682	0.123871	-0.185867	-0.0358925	0.0899849	-0.944981	0.0078125	0.276077	-0.22403	-0.104248	3.05176e-05		4.67682	-0.349705	-0.388924	-0.643402	-0.461498	0.117344	0.0620193	-0.164562	-0.489502	-0.160736	-0.04533
		4.68706	0.122242	-0.0860291	-0.0628433	0.119293	-0.909409	-0.066227	0.289803	-0.218102	-0.116573	-0.0402145		4.68706	-0.413185	-0.424927	-0.684196	-0.543961	0.0780182	0.129074	-0.249378	-0.471657	-0.191227	-0.047451
		4.6973	0.196487	-0.07798	-0.000106812	0.088562	-0.922714	0.0897789	0.281315	-0.264591	-0.108871	-0.0297394		4.6973	-0.509865	-0.401798	-0.649872	-0.551239	0.0340309	0.0450439	-0.300701	-0.36834	-0.295715	-0.0208778
		4.70754	0.205353	-0.146019	-0.0530815	0.11591	-0.903435	0.107567	0.19677	-0.22858	-0.0180817	0.0255966		4.70754	-0.522072	-0.367077	-0.589474	-0.591629	0.0190659	-0.0805435	-0.271614	-0.379711	-0.473911	0.0323486
		4.71778	0.105076	-0.140488	-0.0533676	0.0766907	-0.948807	0.0449219	0.223572	-0.217529	-0.105724	0.0269547		4.71778	-0.528938	-0.397667	-0.580009	-0.682026	-0.0865631	-0.215347	-0.258461	-0.418839	-0.54752	0.0339203
		4.72802	0.0322151	-0.156181	-0.122341	0.0446129	-0.991283	0.097805	0.200706	-0.122711	-0.161251	0.0456963		4.72802	-0.566799	-0.522499	-0.598091	-0.698631	-0.119144	-0.21661	-0.27774	-0.447803	-0.515896	-0.017086
		4.73827	0.159515	-0.0803413	-0.177631	-0.0701752	-1.048	0.12751	0.12199	-0.117382	-0.203522	-0.040123		4.73827	-0.531345	-0.590046	-0.650627	-0.83688	-0.1465	-0.253479	-0.42754	-0.504032	-0.43885	0.00988007
		4.74851	0.192863	-0.121277	-0.122089	-0.0417175	-1.07912	0.189629	0.216068	-0.113293	-0.205669	-0.00874329		4.74851	-0.609165	-0.619419	-0.732559	-0.80827	-0.104443	-0.320976	-0.500401	-0.53064	-0.354782	-0.0355644
		4.75875	0.204926	-0.0633087	-0.086319	0.105587	-1.09003	0.185707	0.257904	-0.220699	-0.164684	0.0351791		4.75875	-0.658958	-0.734623	-0.728313	-0.810379	-0.135979	-0.442211	-0.460236	-0.598866	-0.312416	-0.153797
		4.76898	0.227131	-0.116272	-0.074585	0.145401	-1.08323	0.158195	0.233021	-0.159821	-0.102982	0.0534592		4.76898	-0.669495	-0.811642	-0.79089	-0.832302	-0.246292	-0.445732	-0.450413	-0.63118	-0.322205	-0.182968
		4.77922	0.195564	-0.160988	-0.0237656	0.105061	-1.04309	0.0842476	0.232376	-0.169941	-0.150532	0.145416		4.77922	-0.733047	-0.816265	-0.914257	-0.977119	-0.327911	-0.529274	-0.506027	-0.676567	-0.367275	-0.276031
		4.78946	0.232925	-0.186317	-0.0779953	0.0150833	-1.13123	0.151554	0.341499	-0.251408	-0.141685	0.176323		4.78946	-0.792389	-0.789078	-1.10703	-1.13049	-0.369064	-0.556248	-0.556629	-0.647919	-0.50737	-0.384911
		4.79971	0.213207	-0.264664	-0.0181618	-0.0402641	-1.11443	0.12973	0.389534	-0.263176	-0.144192	0.159683		4.79971	-0.879745	-0.806683	-1.22495	-1.20266	-0.496117	-0.646107	-0.705666	-0.647942	-0.605194	-0.45208
		4.80995	0.171165	-0.301991	-0.0340195	-0.0354233	-0.985298	0.0753326	0.402431	-0.247417	-0.147598	0.145401		4.80995	-0.907722	-0.771507	-1.23106	-1.34025	-0.471573	-0.736794	-0.763279	-0.646538	-0.616711	-0.527199
		4.82019	0.196629	-0.171249	-0.0274353	-0.0152435	-0.88707	0.182144	0.413338	-0.165878	-0.0708923	0.235466		4.82019	-0.951473	-0.795212	-1.28631	-1.43589	-0.450317	-0.763908	-0.834209	-0.672943	-0.661308	-0.496357
		4.83043	0.141541	-0.135719	0.00063324	-0.045723	-0.848373	0.1413	0.38591	-0.15313	-0.0455818	0.208416		4.83043	-0.92997	-0.880043	-1.30795	-1.50003	-0.475578	-0.877937	-0.924198	-0.665359	-0.66803	-0.581627
		4.84067	0.123363	-0.084671	-0.0392532	-0.0583344	-0.803658	0.130253	0.413361	-0.185867	-0.0439377	0.218777		4.84067	-0.894531	-1.01536	-1.33771	-1.63266	-0.438705	-1.01081	-0.989468	-0.676231	-0.685509	-0.696068
		4.85091	0.141769	-0.15136	-0.0490761	-0.0098877	-0.703129	0.0504303	0.424629	-0.136932	-0.00656509	0.256161		4.85091	-0.978199	-1.08742	-1.42933	-1.66625	-0.538643	-1.06223	-1.09432	-0.72226	-0.787788	-0.73138
		4.86115	0.175823	-0.16497	-0.0954742	0.0708733	-0.640305	-0.0645828	0.582733	-0.0602112	0.0878716	0.270023		4.86115	-1.01696	-1.11736	-1.58066	-1.66129	-0.584274	-1.03107	-1.08381	-0.846973	-0.843033	-0.66555
		4.87139	0.28265	-0.189205	-0.125992	0.27639	-0.548779	-0.0648346	0.632397	-0.0413284	0.0765381	0.314392		4.87139	-0.999146	-1.29317	-1.66337	-1.71815	-0.692493	-1.0373	-1.0797	-0.974232	-0.877316	-0.725086
		4.88163	0.342731	-0.177036	-0.0525436	0.351063	-0.562687	-0.026165	0.626266	-0.0497513	0.10387	0.311317		4.88163	-1.05785	-1.45667	-1.66405	-1.74022	-0.83371	-1.02586	-1.23641	-1.08887	-0.963623	-0.864807
		4.89187	0.309265	-0.084671	0.0513611	0.360065	-0.617157	0.0349579	0.612892	-0.114616	0.0639343	0.374226		4.89187	-1.23907	-1.6254	-1.71379	-1.8612	-0.832733	-1.02748	-1.22824	-1.17057	-0.941986	-0.907833
		4.90211	0.276939	-0.0128136	0.0650787	0.433998	-0.71653	0.188999	0.705734	-0.118706	0.156979	0.482098		4.90211	-1.35299	-1.54954	-1.74442	-1.89943	-0.903576	-0.980145	-1.19857	-1.24506	-0.914032	-0.9869
		4.91235	0.263767	0.00854111	0.147469	0.406723	-0.679836	0.316792	0.795654	-0.0213699	0.347343	0.461472		4.91235	-1.33899	-1.53002	-1.82048	-1.91251	-1.03928	-1.12546	-1.25066	-1.36097	-0.967937	-1.10051
		4.92259	0.198105	0.0329285	0.203148	0.340073	-0.587959	0.346077	0.866451	0.0698242	0.439919	0.530224		4.92259	-1.41793	-1.75027	-1.87271	-1.91322	-1.03839	-1.33142	-1.41017	-1.4823	-1.13291	-1.16622
		4.93283	0.121727	0.176468	0.306541	0.313034	-0.474472	0.372082	0.888306	0.16573	0.522057	0.556557		4.93283	-1.38883	-1.89574	-1.89751	-2.05387	-1.06528	-1.3846	-1.52808	-1.4855	-1.18991	-1.16397
		4.94307	0.162369	0.280338	0.230843	0.39492	-0.271805	0.431709	0.923878	0.238949	0.560623	0.622238		4.94307	-1.42364	-1.92476	-2.01405	-2.19862	-1.22062	-1.46034	-1.63546	-1.52682	-1.23202	-1.23822
		4.95331	0.257496	0.359837	0.263062	0.563206	-0.197071	0.368149	1.04827	0.248566	0.678864	0.72979		4.95331	-1.58526	-2.03191	-2.10963	-2.29329	-1.30927	-1.6151	-1.65981	-1.62815	-1.37354	-1.36802
		4.96355	0.33857	0.426163	0.339775	0.797157	-0.138508	0.373161	1.0721	0.210705	0.770058	0.766685		4.96355	-1.69758	-2.15054	-2.2225	-2.40647	-1.38578	-1.88691	-1.75758	-1.70146	-1.53537	-1.50114
		4.97379	0.510708	0.57682	0.527122	0.824085	-0.135002	0.463371	1.0948	0.285259	0.856892	0.728909		4.97379	-1.76942	-2.1824	-2.26157	-2.44352	-1.4697	-1.90108	-1.93575	-1.86845	-1.5868	-1.56039
		4.98403	0.529781	0.658207	0.538425	0.841988	-0.114746	0.47229	1.20152	0.375191	0.888172	0.815788		4.98403	-1.8061	-2.26876	-2.38758	-2.50846	-1.54195	-1.92112	-2.01814	-1.89604	-1.68527	-1.70902
		4.99427	0.566704	0.685802	0.624908	0.819473	-0.0924454	0.507145	1.35324	0.407494	1.04788	0.92849		4.99427	-1.85038	-2.33335	-2.36955	-2.52842	-1.59237	-1.92614	-2.10339	-2.02205	-1.80595	-1.73916
		5.00451	0.693527	0.669842	0.795116	0.927643	-0.119816	0.494137	1.44814	0.399128	1.10462	1.01574		5.00451	-1.92129	-2.37461	-2.38901	-2.53652	-1.6635	-1.9795	-2.15739	-2.17566	-1.93821	-1.82463
		5.01475	0.719028	0.79998	0.940613	1.00288	-0.0629845	0.563316	1.49657	0.459232	1.31647	1.06837		5.01475	-1.98752	-2.38151	-2.51168	-2.69378	-1.72039	-2.03477	-2.21622	-2.27226	-1.97924	-1.88905
		5.02499	0.754299	0.900856	1.03436	1.22098	0.0565109	0.569191	1.53309	0.542892	1.3554	1.11293		5.02499	-2.131	-2.41741	-2.69628	-2.7891	-1.79377	-2.1347	-2.21657	-2.25169	-1.96128	-2.0217
		5.03523	0.746971	1.10851	1.08253	1.33278	0.125126	0.610748	1.54765	0.67194	1.49019	1.04925		5.03523	-2.14861	-2.45488	-2.88719	-2.78431	-1.84675	-2.29899	-2.30834	-2.20168	-1.9837	-2.09533
		5.04547	0.750023	1.14198	1.22498	1.43884	0.237946	0.647503	1.7176	0.71756	1.69632	1.09017		5.04547	-2.20217	-2.42433	-3.00122	-2.76221	-1.89541	-2.36941	-2.33234	-2.25163	-2.1273	-2.11906
		5.05571	0.825981	1.224	1.3294	1.61571	0.317173	0.668659	1.86595	0.944485	1.86075	1.2199		5.05571	-2.1979	-2.54782	-3.0382	-2.95568	-2.0121	-2.44636	-2.42291	-2.36589	-2.21709	-2.28561
		5.06595	0.916248	1.35533	1.43979	1.69643	0.379639	0.758224	2.02943	1.12313	1.97738	1.33374		5.06595	-2.34043	-2.67253	-3.07239	-3.07787	-2.0668	-2.47492	-2.48777	-2.43779	-2.32863	-2.38412
		5.07619	0.927597	1.4999	1.49576	1.85461	0.449409	0.776653	2.15284	1.19552	2.11898	1.38036		5.07619	-2.42277	-2.70936	-3.1686	-3.18287	-2.07523	-2.55117	-2.60399	-2.53316	-2.45643	-2.39948
		5.08643	0.976784	1.62852	1.60305	1.9427	0.446644	0.843658	2.2345	1.26377	2.38205	1.54294		5.08643	-2.39851	-2.76954	-3.21948	-3.13989	-2.0503	-2.59474	-2.58345	-2.64648	-2.50071	-2.4229
		5.09667	1.07333	1.82646	1.81102	2.01965	0.522461	0.973381	2.28584	1.33838	2.56805	1.6308		5.09667	-2.40962	-2.90975	-3.27043	-3.11313	-2.18587	-2.61818	-2.66896	-2.72752	-2.57224	-2.4427
		5.10691	1.04171	1.91007	1.96258	2.11594	0.709133	1.00957	2.37434	1.48325	2.70989	1.67482		5.10691	-2.51818	-2.9436	-3.32874	-3.22924	-2.28568	-2.64293	-2.6682	-2.75687	-2.62694	-2.57505
		5.11715	1.09026	2.03722	1.99752	2.25851	0.867001	1.13303	2.49895	1.61318	2.76336	1.75969		5.11715	-2.6706	-3.04042	-3.30867	-3.28444	-2.37675	-2.70453	-2.77898	-2.87761	-2.67404	-2.67278
		5.12739	1.26895	2.21157	2.08591	2.29314	0.930897	1.22446	2.53552	1.84122	2.91642	1.90434		5.12739	-2.76476	-3.17271	-3.35355	-3.29472	-2.45995	-2.81475	-2.94117	-2.88699	-2.68914	-2.72979
		5.13763	1.3835	2.35299	2.29591	2.3636	1.06141	1.31824	2.71532	2.00175	3.12701	2.00937		5.13763	-2.85939	-3.19119	-3.43248	-3.46149	-2.59897	-2.87916	-3.02486	-2.9137	-2.78049	-2.804
		5.14787	1.44468	2.43908	2.48188	2.43848	1.11326	1.28422	2.82789	2.08095	3.35793	2.20731		5.14787	-2.85196	-3.23714	-3.65248	-3.53306	-2.74555	-2.92966	-3.13359	-3.0835	-2.81493	-2.91278
		5.15811	1.56967	2.59444	2.61587	2.58805	1.29264	1.30966	2.88933	2.26566	3.50732	2.27927		5.15811	-2.87197	-3.28452	-3.45233	-3.58724	-2.79065	-3.07465	-3.1499	-3.19467	-2.8772	-2.97255
		5.16835	1.7185	2.70214	2.66129	2.84745	1.51995	1.41624	3.11108	2.36181	3.70823	2.33504		5.16835	-3.007	-3.32836	-3.25605	-3.72295	-2.85373	-3.12239	-3.23145	-3.25746	-3.04353	-3.04297
		5.17859	1.78514	2.86551	2.84882	3.0588	1.71791	1.57288	3.24078	2.63564	3.9647	2.49447		5.17859	-3.11915	-3.28496	-3.44974	-3.73301	-2.97112	-3.16753	-3.21072	-3.33882	-3.11166	-3.10195
		5.18883	1.81161	3.05141	2.95809	3.14282	1.90869	1.82308	3.36454	2.81333	4.20552	2.70099		5.18883	-3.23017	-3.34071	-3.73704	-3.74551	-3.02442	-3.25426	-3.19616	-3.34355	-3.16494	-3.19541
		5.19907	1.94064	3.16513	3.11329	3.38724	2.04823	2.05536	3.56436	2.92348	4.37699	2.84853		5.19907	-3.33923	-3.46576	-3.94185	-3.83998	-3.10127	-3.32256	-3.25824	-3.52686	-3.24409	-3.1961
		5.20931	2.01796	3.32325	3.21846	3.56715	2.16879	2.0258	3.76637	3.11095	4.57641	2.83758		5.20931	-3.36595	-3.63985	-3.98338	-3.88921	-3.13335	-3.3979	-3.34592	-3.68516	-3.39982	-3.18122
		5.21955	2.1238	3.53152	3.36916	3.70182	2.3234	2.09954	4.03413	3.38868	4.79216	3.01453		5.21955	-3.48733	-3.70541	-3.98643	-4.03278	-3.22619	-3.41421	-3.54833	-3.772	-3.41641	-3.14236
		5.22979	2.24268	3.7324	3.53722	3.92616	2.54608	2.19659	4.27851	3.65833	5.07807	3.1653		5.22979	-3.54294	-3.79461	-4.05947	-4.01405	-3.38138	-3.54121	-3.66943	-3.79882	-3.33095	-3.23558
		5.24003	2.44616	3.95166	3.7981	4.17467	2.67724	2.31439	4.47344	3.8294	5.43327	3.36218		5.24003	-3.64513	-3.92997	-4.26434	-4.07898	-3.49368	-3.62899	-3.6694	-3.92082	-3.35754	-3.42657
		5.25027	2.64845	4.08953	4.08484	4.29589	2.71522	2.42839	4.66975	3.99431	5.71883	3.57856		5.25027	-3.71331	-4.00761	-4.36491	-4.16759	-3.51528	-3.5962	-3.7037	-3.99726	-3.38577	-3.60437
		5.26051	2.72795	4.27593	4.24601	4.41724	2.78664	2.35008	4.73792	4.14728	6.08189	3.81241		5.26051	-3.69242	-3.91792	-4.42212	-4.19692	-3.58528	-3.58695	-3.68523	-4.03736	-3.50803	-3.80672
		5.27075	2.83092	4.53609	4.48871	4.65212	2.91931	2.39054	4.9578	4.35326	6.30874	3.9735		5.27075	-3.73147	-3.86595	-4.50404	-4.2437	-3.72496	-3.65174	-3.65835	-3.98599	-3.62336	-3.86844
		5.28099	2.90497	4.685	4.65726	4.84932	3.05664	2.60899	5.15297	4.62312	6.63651	4.06641		5.28099	-3.82281	-3.94225	-4.55481	-4.3929	-3.77417	-3.78226	-3.66766	-4.06102	-3.64528	-3.89754
		5.29123	2.93292	4.94593	4.87934	5.04442	3.27149	2.71618	5.41986	4.89719	7.00003	4.22595		5.29123	-3.95535	-4.11575	-4.58527	-4.45811	-3.7697	-3.8314	-3.92371	-4.21069	-3.66948	-3.8474
		5.30147	3.05811	5.19997	4.95411	5.30261	3.54301	2.81952	5.55608	5.1991	7.36518	4.51704		5.30147	-4.08488	-4.24871	-4.6359	-4.48294	-3.76896	-3.92398	-3.90994	-4.20138	-3.66662	-3.88795
		5.31171	3.25554	5.33372	5.1627	5.54241	3.68317	2.87214	5.80619	5.60472	7.82222	4.6932		5.31171	-4.15761	-4.31264	-4.79398	-4.61051	-3.96643	-3.96775	-3.98614	-4.22298	-3.74118	-3.85236
		5.32195	3.36432	5.4884	5.37669	5.77893	3.80131	2.93597	6.06642	5.86894	8.27126	4.8455		5.32195	-4.09008	-4.29079	-4.88452	-4.69955	-4.13771	-3.98869	-4.02411	-4.18711	-3.79642	-3.84136
		5.33219	3.47506	5.65163	5.68124	6.07233	3.92979	3.03522	6.40459	6.17683	8.77765	5.09904		5.33219	-4.18069	-4.39216	-4.90092	-4.70366	-4.1514	-4.06951	-4.15025	-4.32146	-3.87521	-3.8426
		5.34243	3.488	5.9294	5.84254	6.5009	4.10171	3.11645	6.70468	6.59642	9.334	5.4205		5.34243	-4.17303	-4.48201	-4.82024	-4.73414	-4.17727	-4.12348	-4.23782	-4.36341	-3.94014	-3.91965
		5.35267	3.60539	6.26035	6.2378	6.87349	4.34323	3.28074	7.03307	6.96838	9.91196	5.68264		5.35267	-4.30203	-4.53603	-4.9533	-4.83295	-4.25598	-4.24503	-4.37038	-4.41939	-3.95425	-4.02406
		5.36291	3.77417	6.50646	6.67149	7.26152	4.62373	3.5303	7.45915	7.36515	10.4253	5.96841		5.36291	-4.42429	-4.59824	-4.98817	-4.8564	-4.21566	-4.3158	-4.47478	-4.4701	-4.04677	-4.03828
		5.37315	4.01832	6.82412	7.04316	7.61591	4.94321	3.74168	7.92835	7.678	11.0477	6.21793		5.37315	-4.49155	-4.64864	-5.06374	-4.91161	-4.29801	-4.50458	-4.49975	-4.56506	-4.29065	-4.18313
		5.38339	4.20429	7.34884	7.43128	8.01293	5.28087	3.99386	8.39048	8.07958	11.6265	6.54411		5.38339	-4.50799	-4.68976	-5.20149	-4.97886	-4.36336	-4.54232	-4.53524	-4.61038	-4.33265	-4.29595
		5.39363	4.22268	7.80052	7.84369	8.48816	5.47257	4.20771	8.93339	8.62046	12.3323	6.79804		5.39363	-4.59166	-4.79807	-5.26956	-5.0465	-4.60746	-4.56492	-4.54425	-4.631	-4.26656	-4.38205
		5.40387	4.48001	8.15196	8.31047	8.97971	5.82347	4.44551	9.31857	9.17293	13.0428	7.18885		5.40387	-4.75471	-4.83471	-5.32113	-4.97509	-4.65314	-4.56384	-4.66706	-4.75479	-4.2386	-4.38692
		5.41411	4.7602	8.59455	8.71569	9.39559	6.21506	5.03016	9.76442	9.81219	13.778	7.57896		5.41411	-4.86838	-4.91255	-5.29002	-5.06974	-4.72318	-4.63688	-4.70575	-4.88495	-4.38946	-4.37516
		5.42435	4.93957	8.98534	9.18702	10.0115	6.5953	5.02109	10.3852	10.3427	14.4462	7.99557		5.42435	-4.9253	-4.93382	-5.33847	-5.07987	-4.79966	-4.63741	-4.66348	-4.90714	-4.44015	-4.43803
		5.43459	5.09689	9.42617	9.70228	10.7141	6.90115	4.96071	10.9636	11.0821	15.1189	8.45305		5.43459	-4.8808	-4.91277	-5.37333	-5.18276	-4.79451	-4.69908	-4.59451	-4.99827	-4.49266	-4.49699
		5.44483	5.23192	9.85886	10.2307	11.2682	7.25075	4.90822	11.6092	11.7269	15.8614	8.84407		5.44483	-4.9923	-4.98489	-5.43613	-5.26752	-4.87725	-4.86497	-4.62162	-5.05007	-4.57495	-4.58932
		5.45507	5.46597	10.3368	10.7886	11.8985	7.63861	5.07398	12.2722	12.3469	16.4881	9.31963		5.45507	-5.00566	-4.98304	-5.46451	-5.37051	-4.98098	-4.93285	-4.69064	-5.01199	-4.66727	-4.65073
		5.46531	5.71792	10.9736	11.3946	12.5764	8.10203	5.16962	13.0242	13.0042	17.2309	9.79244		5.46531	-5.03374	-5.02415	-5.60497	-5.39593	-5.03608	-4.9729	-4.82467	-4.99676	-4.76457	-4.75229
		5.47555	5.80981	11.6743	12.0278	13.1999	8.58158	5.33875	13.7911	13.62	17.8698	10.3449		5.47555	-5.06348	-5.11357	-5.6914	-5.42625	-5.05992	-5.02979	-4.88404	-5.10232	-4.88294	-4.8381
		5.48579	5.98942	12.2819	12.7342	13.941	9.23059	5.51747	14.4631	14.2187	18.7123	10.8584		5.48579	-5.11858	-5.21604	-5.66129	-5.46835	-5.0386	-5.06868	-4.93136	-5.16507	-4.85702	-4.91567
		5.49603	6.27304	13.0213	13.3217	14.5662	9.76895	5.67446	15.1665	14.9465	19.4813	11.4973		5.49603	-5.30969	-5.22799	-5.62719	-5.39543	-5.19398	-5.15916	-4.99322	-5.09328	-4.9388	-4.87224
		5.50627	6.60902	13.7113	14.0622	15.2177	10.383	5.93145	15.8739	15.6108	20.1284	12.0899		5.50627	-5.38708	-5.23674	-5.68999	-5.47416	-5.29981	-5.16285	-4.99891	-5.26665	-5.01223	-4.85217
		5.51651	6.84694	14.3692	14.7356	15.9609	10.987	6.20563	16.7605	16.3998	20.8259	12.7214		5.51651	-5.37597	-5.13529	-5.70568	-5.58831	-5.38041	-5.22869	-4.885	-5.39092	-4.90624	-5.00998
		5.52675	7.21336	15.0687	15.3772	16.7634	11.6423	6.43467	17.3543	17.3479	21.4334	13.3802		5.52675	-5.38367	-5.17221	-5.72998	-5.63968	-5.41388	-5.2528	-4.88969	-5.52363	-4.87952	-5.03959
		5.53699	7.55506	15.8206	16.0673	17.4299	12.3013	6.82414	17.9474	18.0751	22.0612	14.0765		5.53699	-5.47902	-5.25079	-5.80642	-5.69982	-5.37475	-5.3291	-4.9154	-5.57135	-4.8946	-5.06303
		5.54723	7.93838	16.6739	16.8589	18.2092	12.9164	7.0885	18.651	18.8962	22.6547	14.8815		5.54723	-5.61355	-5.29214	-5.88192	-5.69535	-5.42942	-5.2992	-4.84998	-5.56065	-5.0146	-5.02101
		5.55747	8.39868	17.3933	17.6917	19.0039	13.5488	7.30536	19.5001	19.6168	23.1487	15.5763		5.55747	-5.5185	-5.32893	-6.05729	-5.5893	-5.55553	-5.24608	-4.86568	-5.55228	-5.11829	-5.00998
		5.56771	8.81329	18.1736	18.3516	19.7295	14.1164	7.64092	20.1841	20.374	23.6291	16.2179		5.56771	-5.52248	-5.32089	-6.15718	-5.65055	-5.62165	-5.30631	-4.94743	-5.59296	-5.10282	-4.99771
		5.57795	9.0985	18.8804	19.1459	20.4466	14.8534	7.944	20.828	20.984	24.0705	16.9026		5.57795	-5.56437	-5.27099	-6.27525	-5.73563	-5.63945	-5.36484	-5.07523	-5.64822	-5.11804	-5.06123
		5.58819	9.3972	19.6348	19.8852	21.1336	15.6274	8.34961	21.4297	21.6918	24.5002	17.709		5.58819	-5.63616	-5.27843	-6.29124	-5.77088	-5.72687	-5.44962	-5.05654	-5.80166	-5.18519	-5.11233
		5.59843	9.92374	20.3609	20.56	21.8086	16.3511	8.76483	22.0471	22.3456	24.8737	18.4074		5.59843	-5.69576	-5.31202	-6.26899	-5.79067	-5.77616	-5.46899	-5.10719	-5.87649	-5.24021	-5.11531
		5.60867	10.5131	21.0881	21.1376	22.4201	17.0791	9.09821	22.7843	22.9106	25.2306	19.2306		5.60867	-5.80188	-5.33862	-6.28831	-5.75976	-5.77903	-5.51187	-5.18281	-5.91157	-5.29347	-5.22326
		5.61891	11.0342	21.718	21.6865	22.9696	17.7915	9.5039	23.3733	23.3854	25.5548	20.0055		5.61891	-5.78326	-5.43421	-6.38842	-5.8613	-5.82066	-5.50119	-5.23574	-5.89706	-5.25104	-5.21766
		5.62915	11.6006	22.3099	22.2889	23.4765	18.5576	9.97421	23.9588	23.9	25.886	20.4885		5.62915	-5.79203	-5.50612	-6.36936	-5.84439	-5.91394	-5.45742	-5.26127	-5.85596	-5.37911	-5.20086
		5.63939	12.1754	22.8608	22.8709	24.0527	19.3474	10.4614	24.4692	24.3527	26.1243	21.1179		5.63939	-5.8591	-5.62217	-6.26477	-5.83536	-5.97003	-5.54346	-5.21465	-5.87701	-5.48765	-5.24698
		5.64963	12.7575	23.386	23.4885	24.5139	20.0179	10.9944	24.786	24.8567	26.3883	21.8218		5.64963	-5.93894	-5.5685	-6.35163	-5.87245	-6.08013	-5.6517	-5.2219	-5.91189	-5.40984	-5.17835
		5.65987	13.3964	23.9217	24.0078	24.8427	20.6901	11.5459	25.0991	25.2965	26.4901	22.3968		5.65987	-6.00704	-5.66145	-6.42475	-5.92731	-6.09507	-5.7304	-5.24388	-5.9143	-5.34726	-5.19225
		5.67011	14.0527	24.3325	24.4496	25.139	21.3924	12.2256	25.4578	25.6873	26.5	22.956		5.67011	-6.05587	-5.8149	-6.36306	-5.91617	-6.13745	-5.77873	-5.11272	-5.90919	-5.41221	-5.33653
		5.68035	14.7904	24.8368	24.9017	25.4552	21.9807	12.7942	25.7751	25.9996	26.4121	23.5152		5.68035	-6.04071	-5.83071	-6.37872	-5.91903	-6.24558	-5.83714	-5.15663	-5.88396	-5.38544	-5.46122
		5.69059	15.4964	25.3092	25.3462	25.7355	22.4647	13.3784	26.0962	26.3107	26.4788	24.0277		5.69059	-6.05217	-5.80024	-6.51704	-6.00964	-6.25114	-5.86747	-5.29371	-5.9703	-5.38753	-5.42523
		5.70083	16.2161	25.7111	25.704	25.9531	23.0891	14.0638	26.2954	26.5536	26.3051	24.5071		5.70083	-6.081	-5.71716	-6.51711	-6.06357	-6.3261	-5.86709	-5.34975	-5.96442	-5.44017	-5.44944
		5.71107	16.8106	25.9145	25.9972	26.1866	23.6871	14.6073	26.4261	26.6354	26.2317	24.9248		5.71107	-6.10622	-5.75923	-6.52097	-6.09582	-6.34742	-5.8957	-5.39838	-5.94582	-5.5582	-5.44637
		5.72131	17.4418	26.0821	26.2085	26.3778	24.2453	15.1703	26.5934	26.7053	26.0576	25.2921		5.72131	-6.22465	-5.71775	-6.43055	-6.07526	-6.39687	-5.89954	-5.45918	-5.96712	-5.60514	-5.54805
		5.73155	17.9758	26.2517	26.3434	26.4487	24.7025	15.8243	26.6235	26.7621	25.9705	25.6541		5.73155	-6.14656	-5.64385	-6.46427	-6.04224	-6.32194	-5.89152	-5.46912	-6.03669	-5.6856	-5.58267
		5.74179	18.6765	26.4342	26.4597	26.4892	25.0355	16.4154	26.6409	26.7643	25.7553	25.9519		5.74179	-6.14914	-5.68002	-6.54896	-6.04211	-6.33097	-5.91756	-5.44051	-6.0451	-5.77239	-5.61546
		5.75203	19.3045	26.6849	26.5357	26.5344	25.3414	17.1331	26.6559	26.7611	25.4773	26.3119		5.75203	-6.19505	-5.72828	-6.58077	-5.95454	-6.38918	-5.99992	-5.42823	-6.12508	-5.79789	-5.61482
		5.76227	20.0089	26.7708	26.6945	26.5112	25.6968	17.7876	26.6153	26.6742	25.1774	26.4845		5.76227	-6.13359	-5.78421	-6.62175	-6.10305	-6.48509	-6.05326	-5.42024	-6.17197	-5.77962	-5.54736
		5.77251	20.7135	26.6794	26.6736	26.3737	25.9605	18.5669	26.4566	26.4834	24.8636	26.585		5.77251	-6.15155	-5.82227	-6.64226	-6.25178	-6.56796	-5.9703	-5.42983	-6.13933	-5.73058	-5.50544
		5.78275	21.3685	26.6305	26.5212	26.2168	26.1176	19.2384	26.2814	26.3761	24.5133	26.6806		5.78275	-6.11041	-5.80645	-6.6358	-6.29069	-6.61265	-5.98324	-5.41955	-6.22078	-5.66514	-5.57957
		5.79299	22.0676	26.5319	26.3376	26.0052	26.2764	19.7961	26.0024	26.2603	24.0886	26.7222		5.79299	-6.21627	-5.80378	-6.55658	-6.21421	-6.67029	-6.04655	-5.49358	-6.27326	-5.76332	-5.69614
		5.80323	22.6748	26.3562	26.1966	25.7379	26.3245	20.3436	25.8425	26.0346	23.7567	26.8039		5.80323	-6.28482	-5.77732	-6.6538	-6.16749	-6.71302	-6.12517	-5.46507	-6.30088	-5.76301	-5.80519
		5.81347	23.1924	26.2298	26.0172	25.3976	26.3761	21.0338	25.7176	25.7315	23.3799	26.751		5.81347	-6.19481	-5.75846	-6.67651	-6.24346	-6.66444	-6.17055	-5.45481	-6.22598	-5.70911	-5.80157
		5.82371	23.6579	26.0703	25.8063	25.092	26.4042	21.661	25.4275	25.4021	23.035	26.6143		5.82371	-6.28909	-5.82065	-6.69307	-6.27383	-6.64782	-6.2113	-5.46884	-6.25644	-5.75925	-5.72306
		5.83395	24.2403	25.8453	25.677	24.7493	26.4021	22.2571	25.0392	25.0754	22.6529	26.3214		5.83395	-6.35353	-5.9766	-6.73695	-6.33556	-6.57755	-6.25923	-5.41951	-6.24986	-5.85113	-5.70002
		5.84419	24.6873	25.581	25.4589	24.424	26.3503	22.79	24.6897	24.8071	22.2408	26.1916		5.84419	-6.33531	-6.04171	-6.72289	-6.33646	-6.64054	-6.33839	-5.44879	-6.30523	-5.84016	-5.57508
		5.85443	25.0678	25.2679	25.1326	24.1612	26.2915	23.2933	24.3377	24.4058	21.9704	26.1295		5.85443	-6.42503	-6.03861	-6.70225	-6.24998	-6.63058	-6.34313	-5.52915	-6.4102	-5.86015	-5.61771
		5.86467	25.3003	24.9793	24.8181	23.7191	26.1905	23.7529	23.9677	23.964	21.5425	25.9638		5.86467	-6.42203	-6.01744	-6.69271	-6.17632	-6.57619	-6.3436	-5.49419	-6.41984	-5.91081	-5.59579
		5.87491	25.5065	24.5991	24.5161	23.3187	25.975	24.2203	23.4945	23.4657	21.0322	25.6323		5.87491	-6.34924	-5.87214	-6.72797	-6.175	-6.51852	-6.28144	-5.4449	-6.38004	-5.90203	-5.49337
		5.88515	25.7342	24.2106	24.0907	22.8025	25.7088	24.7673	23.1031	23.1637	20.5108	25.3163		5.88515	-6.36872	-5.80994	-6.71346	-6.18047	-6.62595	-6.2914	-5.46152	-6.40065	-5.9864	-5.51046
		5.89539	25.9643	23.7537	23.7169	22.3186	25.3296	25.1703	22.6578	22.6121	20.0564	24.8993		5.89539	-6.44117	-5.85918	-6.65762	-6.10639	-6.7084	-6.33179	-5.55178	-6.44087	-5.95891	-5.55217
		5.90563	26.2287	23.2982	23.2585	21.9427	24.9935	25.4784	22.1679	21.9832	19.5365	24.5038		5.90563	-6.59896	-5.89232	-6.53564	-6.09008	-6.78894	-6.35451	-5.52846	-6.37856	-5.91672	-5.60979
		5.91587	26.3124	22.7498	22.8261	21.5568	24.6722	25.6488	21.825	21.4856	19.1594	24.1617		5.91587	-6.63651	-5.92632	-6.50112	-6.08918	-6.76118	-6.31133	-5.49115	-6.47443	-5.9661	-5.76957
		5.92611	26.4646	22.3705	22.4574	21.0349	24.4608	25.9318	21.2191	20.9606	18.7857	23.7463		5.92611	-6.52385	-5.90839	-6.47611	-6.19188	-6.66689	-6.21854	-5.45302	-6.49928	-5.99862	-5.83624
		5.93635	26.4469	21.9702	22.1362	20.5994	24.0021	26.078	20.6674	20.4909	18.365	23.3606		5.93635	-6.45903	-5.88905	-6.49744	-6.22852	-6.66527	-6.12517	-5.39132	-6.50283	-6.01702	-5.8292
		5.94659	26.3361	21.55	21.6188	20.1066	23.5382	26.2502	20.2357	20.0482	17.8421	22.9399		5.94659	-6.45879	-5.81887	-6.51371	-6.20964	-6.7527	-6.13504	-5.39219	-6.43223	-5.94775	-5.85116
		5.95683	26.2567	21.0889	21.0478	19.6926	23.168	26.3754	19.7489	19.5497	17.518	22.5611		5.95683	-6.3809	-5.73808	-6.57415	-6.10277	-6.81289	-6.09929	-5.48434	-6.28939	-5.92491	-5.77396
		5.96707	26.1671	20.6702	20.5676	19.1328	22.7492	26.5545	19.2807	19.0829	17.1731	22.1084		5.96707	-6.41476	-5.70618	-6.5472	-6.34546	-6.83162	-6.14746	-5.53787	-6.27122	-6.00952	-5.67005
		5.97731	25.9882	20.2536	20.1091	18.5922	22.323	26.6144	18.8647	18.5836	16.673	21.5944		5.97731	-6.48565	-5.79678	-6.48441	-6.61248	-6.96959	-6.18764	-5.48196	-6.26747	-5.99752	-5.6882
		5.98755	25.848	19.7652	19.6729	18.1487	21.8791	26.4537	18.3971	18.046	16.2217	21.091		5.98755	-6.40141	-5.80727	-6.50404	-6.43269	-6.8979	-6.21944	-5.54191	-6.32226	-6.06908	-5.66058
		5.99779	25.7024	19.2919	19.2732	17.7	21.4102	26.3309	17.9453	17.5261	15.6737	20.7817		5.99779	-6.39258	-5.77268	-6.50111	-6.2499	-6.87028	-6.22663	-5.64116	-6.38743	-6.11938	-5.66611
		6.00803	25.4021	18.7448	18.8195	17.243	21.0343	26.1987	17.5628	17.0532	15.1431	20.4235		6.00803	-6.34535	-5.72661	-6.55862	-6.20028	-6.86499	-6.1734	-5.58038	-6.4823	-6.12241	-5.65459
		6.01827	24.9715	18.2706	18.3661	16.81	20.5546	26.0708	17.0436	16.6252	14.6226	19.9088		6.01827	-6.32666	-5.74617	-6.54641	-6.12213	-6.87898	-6.12256	-5.4446	-6.38154	-6.05882	-5.6877
		6.02851	24.6486	17.7146	17.8425	16.3429	20.1583	25.8283	16.5778	16.1915	14.2053	19.3921		6.02851	-6.35323	-5.74622	-6.57982	-6.10644	-6.84362	-6.0957	-5.46067	-6.32102	-5.95705	-5.76331
		6.03875	24.3172	17.2796	17.3623	15.8365	19.5974	25.6034	16.0717	15.6679	13.7965	18.9029		6.03875	-6.38331	-5.61448	-6.66761	-6.08254	-6.83326	-6.1634	-5.46037	-6.20182	-5.95492	-5.74897
		6.04899	23.9172	16.9036	16.8757	15.2745	19.0628	25.3282	15.5581	15.1676	13.4209	18.5229		6.04899	-6.41608	-5.69426	-6.51754	-6.13118	-6.83333	-6.04873	-5.43345	-6.18545	-5.99197	-5.74736
		6.05923	23.5124	16.4543	16.3976	14.8534	18.5682	25.0548	15.1313	14.7862	12.9906	17.9864		6.05923	-6.31797	-5.75642	-6.39468	-6.13951	-6.86449	-6.09218	-5.37428	-6.17734	-6.06166	-5.73323
		6.06947	23.0475	15.8958	16.024	14.4544	18.0536	24.6829	14.6491	14.3386	12.5593	17.4297		6.06947	-6.2739	-5.75941	-6.40157	-6.15659	-7.01149	-6.06175	-5.3458	-6.16752	-5.99612	-5.69627
		6.07971	22.7789	15.3596	15.4968	14.0358	17.6417	24.3404	14.2885	13.999	12.1505	16.8493		6.07971	-6.21182	-5.66997	-6.4247	-6.06714	-6.97078	-6.15939	-5.46781	-6.23818	-5.97935	-5.65644
		6.08995	22.3911	14.8494	14.9515	13.5752	17.2517	23.934	13.7908	13.5917	11.8264	16.3567		6.08995	-6.21949	-5.62605	-6.4119	-6.02937	-6.86509	-6.14273	-5.45015	-6.2679	-6.01972	-5.59249
		6.10019	21.978	14.4484	14.5741	13.1452	16.8328	23.5828	13.3822	13.2108	11.4306	15.9447		6.10019	-6.30554	-5.62865	-6.44557	-6.00182	-6.842	-6.18929	-5.43068	-6.25724	-5.9313	-5.57712
		6.11043	21.4353	14.0178	14.2267	12.6396	16.2013	23.1517	13.0392	12.7367	11.13	15.4827		6.11043	-6.3113	-5.66579	-6.48188	-6.02432	-6.83379	-6.23519	-5.42525	-6.21067	-5.94102	-5.56173
		6.12067	21.0574	13.6035	13.768	12.2135	15.7636	22.7491	12.6639	12.3561	10.7902	15.1065		6.12067	-6.35611	-5.68433	-6.33714	-6.09	-6.70826	-6.21002	-5.45751	-6.04426	-5.80532	-5.55721
		6.13091	20.5594	13.1204	13.2799	11.7629	15.261	22.3738	12.1714	11.8921	10.4799	14.7444		6.13091	-6.21099	-5.63377	-6.38765	-6.08059	-6.57658	-6.13364	-5.37609	-5.97433	-5.67029	-5.52228
		6.14115	20.1352	12.6701	12.9789	11.323	14.8614	21.9903	11.6032	11.466	10.0442	14.2706		6.14115	-6.13895	-5.55238	-6.38873	-6.03549	-6.65391	-6.10735	-5.31738	-6.04702	-5.68044	-5.606
		6.15139	19.6644	12.2379	12.5046	10.9084	14.4092	21.518	11.214	10.9524	9.58491	13.7962		6.15139	-6.13924	-5.72303	-6.43887	-6.0451	-6.71817	-6.02366	-5.24314	-6.13332	-5.75113	-5.66363
		6.16163	19.0949	11.8973	12.0566	10.5258	13.8833	21.1382	10.875	10.5845	9.31764	13.3002		6.16163	-6.13719	-5.75576	-6.51756	-5.94315	-6.73601	-6.03305	-5.22315	-6.18861	-5.72751	-5.59909
		6.17187	18.7432	11.5472	11.6229	10.1591	13.445	20.6421	10.5212	10.3309	9.05543	12.8796		6.17187	-6.16988	-5.60009	-6.48035	-5.83525	-6.66951	-6.06742	-5.21246	-6.08967	-5.89217	-5.56363
		6.18211	18.2534	11.0857	11.291	9.80748	13.0307	20.0943	10.0937	9.93601	8.771	12.4061		6.18211	-6.04742	-5.51081	-6.44806	-5.85872	-6.67385	-6.0738	-5.25588	-5.97512	-5.94436	-5.50788
		6.19235	17.8429	10.7501	10.9672	9.39872	12.6815	19.6469	9.71898	9.56298	8.48252	12.0734		6.19235	-5.98826	-5.4885	-6.44609	-5.87474	-6.6758	-6.09719	-5.3229	-5.99557	-5.99866	-5.49699
		6.20259	17.2544	10.4111	10.5505	9.07625	12.2326	19.1161	9.30048	9.14924	8.08103	11.6717		6.20259	-5.97857	-5.45052	-6.47978	-5.91125	-6.70336	-6.09787	-5.2682	-5.98389	-5.96389	-5.4814
		6.21283	16.7308	9.98344	10.1374	8.75278	11.8105	18.6303	9.00529	8.77784	7.68692	11.2392		6.21283	-6.06147	-5.3958	-6.48481	-5.88234	-6.75624	-6.03927	-5.15803	-6.0196	-5.88587	-5.48431
		6.22307	16.2376	9.56374	9.78726	8.28757	11.3766	18.134	8.60902	8.39837	7.30143	10.8315		6.22307	-6.01068	-5.29968	-6.41887	-5.89944	-6.78794	-6.04346	-5.16525	-6.07852	-5.80397	-5.44828
		6.23331	15.8656	9.28186	9.41509	7.87621	10.9451	17.6693	7.951	8.07338	6.96906	10.4477		6.23331	-5.99622	-5.28083	-6.35421	-5.89423	-6.83123	-5.91863	-5.11021	-6.20392	-5.71371	-5.40868
		6.24355	15.4332	8.9874	9.07495	7.58625	10.505	17.3245	7.59494	7.8023	6.69903	10.0889		6.24355	-5.97829	-5.27219	-6.43508	-5.90672	-6.744	-5.87083	-5.08751	-6.22844	-5.73145	-5.36364
		6.25379	14.9736	8.60042	8.67054	7.2641	10.0547	16.9829	7.44891	7.4333	6.51341	9.74614		6.25379	-6.01291	-5.16749	-6.48254	-5.85927	-6.72754	-5.94878	-5.03635	-6.19029	-5.64641	-5.29745
		6.26403	14.606	8.28449	8.32782	6.94319	9.59467	16.4925	7.25291	7.03717	6.36406	9.39174		6.26403	-5.98034	-5.21905	-6.46997	-5.75841	-6.67879	-5.92803	-5.03305	-6.1169	-5.59249	-5.27071
		6.27427	14.2429	7.90819	8.05898	6.59638	9.40377	15.9411	7.13177	6.72963	5.96033	9.01504		6.27427	-5.87122	-5.25089	-6.35841	-5.75708	-6.65175	-5.9114	-5.03985	-5.95525	-5.58311	-5.21952
		6.28451	13.8311	7.5846	7.83161	6.32171	9.03775	15.4185	6.93857	6.43634	5.62148	8.5984		6.28451	-5.85822	-5.14049	-6.33855	-5.76685	-6.61863	-5.82267	-5.1169	-5.92455	-5.56484	-5.19468
		6.29475	13.4148	7.25599	7.5052	6.03571	8.67184	15.0423	6.46278	6.18501	5.40448	8.24006		6.29475	-5.8271	-5.10599	-6.30833	-5.72239	-6.66496	-5.8406	-5.14309	-6.01686	-5.69909	-5.26224
		6.30499	12.8302	6.96741	7.15371	5.74864	8.19308	14.5722	6.04148	5.94645	5.16895	7.94926		6.30499	-5.75706	-5.08106	-6.1638	-5.6634	-6.66643	-5.90784	-4.92578	-6.01353	-5.7833	-5.24701
		6.31523	12.2994	6.66939	6.78594	5.43112	7.8494	14.04	5.72331	5.68421	4.95478	7.63332		6.31523	-5.71441	-5.01531	-6.06726	-5.56659	-6.61444	-5.86322	-4.80193	-6.01369	-5.80128	-5.14311
		6.32547	11.9362	6.38	6.53868	5.19898	7.55637	13.6282	5.50706	5.34476	4.70989	7.21605		6.32547	-5.74636	-5.06023	-6.08107	-5.57619	-6.54358	-5.73417	-4.80122	-5.92255	-5.68044	-5.12576
		6.33571	11.5198	6.07092	6.22088	4.86863	7.31311	13.1873	5.25562	5.1582	4.36758	6.95795		6.33571	-5.78555	-5.0414	-6.0626	-5.64086	-6.47642	-5.60698	-4.8731	-5.93526	-5.61596	-5.1354
		6.34595	11.1045	5.74228	5.85871	4.62807	6.95169	12.7991	4.9586	4.85261	4.10622	6.6127		6.34595	-5.75866	-5.08971	-6.07881	-5.65637	-6.40816	-5.54487	-4.93006	-5.90907	-5.61217	-5.18575
		6.35619	10.7024	5.50045	5.49133	4.38055	6.62977	12.4366	4.64233	4.58094	3.80518	6.34462		6.35619	-5.7123	-5.05107	-5.9838	-5.52596	-6.22867	-5.57016	-5.01035	-5.81908	-5.60294	-5.19151
		6.36643	10.3587	5.23922	5.18724	4.09214	6.40552	12.113	4.37714	4.31219	3.544	6.06155		6.36643	-5.66601	-4.98176	-5.89262	-5.42456	-6.24197	-5.68578	-4.96806	-5.80233	-5.57238	-5.18536
		6.37667	9.84997	4.95756	4.85118	3.77685	6.1039	11.8243	4.12189	4.1103	3.29751	5.85017		6.37667	-5.5812	-4.97991	-5.88407	-5.38773	-6.27264	-5.65854	-4.98012	-5.83429	-5.59922	-5.25523
		6.38691	9.45287	4.66692	4.52191	3.49727	5.79744	11.4841	3.87642	3.85197	3.1036	5.49926		6.38691	-5.48599	-4.93522	-5.84319	-5.3484	-6.25282	-5.55664	-4.95091	-5.82661	-5.55933	-5.30148
		6.39715	9.05713	4.35337	4.23473	3.17651	5.45918	10.9825	3.68806	3.63033	2.89902	5.19169		6.39715	-5.37246	-4.89034	-5.93856	-5.28961	-6.19825	-5.48978	-4.90807	-5.83533	-5.48218	-5.21595
		6.40739	8.71234	4.08321	4.04967	2.90955	5.09068	10.5404	3.44879	3.44156	2.77977	4.91093		6.40739	-5.39213	-4.89319	-5.99578	-5.10635	-6.14732	-5.44918	-4.93607	-5.84988	-5.48154	-5.13753
		6.41763	8.36985	3.75048	3.82936	2.60416	4.6368	10.1215	3.1489	3.18596	2.52849	4.72502		6.41763	-5.52066	-4.88959	-5.90669	-5.03115	-6.24301	-5.38882	-4.97387	-5.74187	-5.49763	-5.01867
		6.42787	7.87194	3.50848	3.66483	2.38934	4.39714	9.63646	2.94946	2.89314	2.35358	4.5029		6.42787	-5.46743	-4.86788	-5.89028	-4.96605	-6.25175	-5.40042	-4.87706	-5.64168	-5.37566	-4.96646
		6.43811	7.43429	3.307	3.45607	2.11967	4.12578	9.25716	2.6124	2.57169	2.17458	4.22557		6.43811	-5.37797	-4.67965	-5.81747	-5.09988	-6.22062	-5.33584	-4.75422	-5.60897	-5.32421	-4.99139
		6.44835	7.17695	3.05641	3.09104	1.90416	3.87501	8.93693	2.25115	2.35096	1.94634	3.96029		6.44835	-5.23849	-4.61286	-5.81752	-5.10286	-6.18499	-5.34852	-4.66222	-5.6122	-5.2745	-4.9934
		6.45859	6.99702	2.85332	2.87274	1.64486	3.61525	8.50772	2.035	2.19041	1.74325	3.75203		6.45859	-5.25319	-4.60075	-5.74361	-5.08322	-6.29323	-5.39576	-4.82239	-5.54377	-5.18616	-4.98718
		6.46883	6.75525	2.75153	2.63811	1.34746	3.30655	8.17404	1.76349	1.93873	1.55338	3.50621		6.46883	-5.36753	-4.50629	-5.62014	-5.12126	-6.29137	-5.38344	-4.92495	-5.59169	-5.16051	-4.91732
		6.47907	6.47472	2.68837	2.34617	1.16068	3.19586	7.77169	1.48702	1.73606	1.36844	3.26289		6.47907	-5.4102	-4.56905	-5.51104	-5.1468	-6.22458	-5.41615	-4.89724	-5.67544	-5.2334	-4.84732
		6.48931	6.11308	2.43267	2.06843	1.11604	2.8902	7.49255	1.2439	1.52651	1.20417	3.01619		6.48931	-5.3682	-4.55735	-5.50761	-5.12196	-6.2808	-5.3826	-4.8149	-5.6797	-5.18596	-4.7973
		6.49955	5.71569	2.17601	1.9024	0.896992	2.68451	7.21383	1.01801	1.32765	1.00584	2.84232		6.49955	-5.36348	-4.6362	-5.54477	-5.10338	-6.15024	-5.44366	-4.73895	-5.59469	-5.17236	-4.84107
		6.50979	5.43469	2.03462	1.66873	0.700096	2.39165	6.9758	0.96386	1.06111	0.764996	2.69108		6.50979	-5.25355	-4.6188	-5.58484	-5.10525	-6.10024	-5.53419	-4.66277	-5.49415	-5.21155	-4.84496
		6.52003	5.26543	1.90691	1.49166	0.636749	2.18385	6.6208	0.751198	0.846973	0.615269	2.4427		6.52003	-5.09818	-4.60292	-5.59289	-5.02294	-6.05754	-5.50862	-4.66936	-5.50742	-5.04057	-4.71238
		6.53027	5.05999	1.72249	1.32888	0.456322	1.93171	6.31173	0.462906	0.630051	0.43586	2.14713		6.53027	-5.04871	-4.616	-5.49561	-5.02544	-6.04018	-5.38421	-4.61851	-5.49482	-5.03506	-4.68866
		6.54051	4.72181	1.43782	1.14677	0.115997	1.6625	5.98613	0.289097	0.563301	0.255829	1.8521		6.54051	-5.049	-4.63973	-5.46586	-5.02299	-5.97366	-5.25571	-4.59975	-5.53642	-5.02872	-4.6466
		6.55075	4.34681	1.12502	0.877743	-0.133953	1.48012	5.62657	0.114944	0.494198	0.11615	1.48738		6.55075	-5.13905	-4.61053	-5.57905	-5.04588	-5.90473	-5.25224	-4.57799	-5.4271	-4.9383	-4.68892
		6.56099	4.07664	0.892632	0.768677	-0.255665	1.36104	5.35419	-0.0292244	0.289883	-0.0746918	1.34496		6.56099	-5.08364	-4.51197	-5.60772	-4.9378	-5.91142	-5.16573	-4.56186	-5.35131	-4.88315	-4.67364
		6.57123	3.89864	0.804451	0.574295	-0.561031	1.15071	5.12277	-0.175137	0.0187683	-0.235672	1.27648		6.57123	-4.92741	-4.41645	-5.45896	-4.87894	-5.92653	-5.15714	-4.53073	-5.32088	-4.95115	-4.63741
		6.58147	3.7042	0.675262	0.458721	-0.604862	0.877632	4.94278	-0.307079	-0.217457	-0.362453	1.0885		6.58147	-4.91614	-4.35527	-5.37962	-4.7448	-5.90814	-5.02861	-4.47002	-5.37878	-5.03365	-4.53653
		6.59171	3.47607	0.522888	0.325325	-0.709743	0.736958	4.71741	-0.585575	-0.343914	-0.510323	0.826492		6.59171	-4.95066	-4.32964	-5.27206	-4.69344	-5.86642	-5.00172	-4.5593	-5.32822	-4.98046	-4.55146
		6.60195	3.18897	0.317436	0.192417	-0.849575	0.63068	4.50539	-0.668545	-0.653229	-0.652641	0.625591		6.60195	-4.92808	-4.32474	-5.24852	-4.63343	-5.90843	-5.00747	-4.59474	-5.34155	-4.90383	-4.55144
		6.61219	2.88451	0.0936089	0.0836182	-0.98587	0.482193	4.17542	-0.681435	-0.879726	-0.739258	0.531891		6.61219	-4.82685	-4.30574	-5.19753	-4.66018	-5.84746	-4.96299	-4.58236	-5.35456	-4.87706	-4.64517
		6.62243	2.62836	0.043644	-0.0537033	-1.14927	0.346699	3.94954	-0.842304	-1.00721	-0.833054	0.293404		6.62243	-4.76459	-4.0755	-5.19308	-4.58718	-5.82569	-4.96716	-4.40392	-5.36696	-4.88524	-4.58032
		6.63267	2.30799	-0.0121307	-0.287193	-1.23088	0.106968	3.72742	-0.986427	-1.08343	-0.94212	0.0247612		6.63267	-4.73041	-4.0827	-5.09961	-4.61665	-5.81012	-5.0147	-4.41733	-5.38169	-4.81883	-4.50578
		6.64291	2.22141	-0.133118	-0.594231	-1.41729	-0.116917	3.61711	-1.14126	-1.36346	-1.17297	-0.177345		6.64291	-4.58504	-4.14122	-4.99841	-4.59494	-5.76892	-5.00194	-4.34839	-5.35418	-4.82713	-4.36864
		6.65315	2.07905	-0.274845	-0.87566	-1.49474	-0.279732	3.38643	-1.19621	-1.49303	-1.30661	-0.275631		6.65315	-4.5585	-4.15421	-5.05299	-4.54499	-5.77988	-4.87888	-4.29975	-5.32014	-4.8054	-4.25511
		6.66339	1.81277	-0.295456	-0.964912	-1.57932	-0.437637	3.13784	-1.25967	-1.56245	-1.39789	-0.422512		6.66339	-4.63877	-4.00027	-5.04094	-4.50892	-5.80297	-4.78798	-4.16402	-5.19987	-4.73269	-4.31927
		6.67363	1.65093	-0.421867	-1.01534	-1.58497	-0.638359	2.92769	-1.36089	-1.70937	-1.49655	-0.584087		6.67363	-4.69732	-3.98902	-4.98521	-4.43631	-5.76324	-4.85138	-4.1343	-5.24942	-4.7145	-4.3721
		6.68387	1.29583	-0.528713	-1.10838	-1.71177	-0.813957	2.75837	-1.49419	-1.77347	-1.52324	-0.709743		6.68387	-4.67226	-4.04981	-4.93931	-4.40265	-5.64038	-4.83409	-4.13371	-5.25108	-4.69245	-4.35818
		6.69411	1.00897	-0.622665	-1.31809	-1.82615	-0.904785	2.49806	-1.67447	-1.82833	-1.56454	-0.773178		6.69411	-4.62951	-4.05318	-4.89135	-4.38252	-5.54298	-4.75748	-4.12719	-5.15295	-4.70244	-4.34066
		6.70435	0.886467	-0.662075	-1.40127	-1.85313	-0.974556	2.20913	-1.79111	-2.03789	-1.67478	-0.699173		6.70435	-4.58224	-4.00158	-4.77706	-4.39219	-5.5276	-4.65964	-4.12304	-5.08288	-4.61408	-4.23542
		6.71459	0.743488	-0.706429	-1.4436	-2.01881	-1.12178	2.12599	-1.83072	-1.95972	-1.84971	-0.849312		6.71459	-4.48891	-4.02505	-4.71266	-4.36147	-5.44478	-4.56021	-4.09137	-5.04736	-4.48834	-4.1235
		6.72483	0.690022	-0.912354	-1.43773	-2.17496	-1.2735	2.14771	-1.93823	-2.03292	-1.98776	-0.984631		6.72483	-4.40372	-3.96623	-4.71714	-4.2654	-5.42018	-4.58059	-4.1319	-5.02406	-4.47772	-4.17191
		6.73507	0.548584	-1.11985	-1.49287	-2.31956	-1.27823	1.92965	-2.16228	-2.20626	-2.00135	-1.17242		6.73507	-4.43228	-3.8855	-4.76999	-4.21229	-5.40009	-4.52855	-4.16092	-5.02204	-4.49446	-4.11569
		6.74531	0.326694	-1.21955	-1.59353	-2.38448	-1.33072	1.60195	-2.29919	-2.37542	-2.10694	-1.39853		6.74531	-4.41733	-3.82217	-4.83499	-4.21294	-5.38127	-4.53321	-4.03159	-4.95051	-4.41126	-3.95333
		6.75555	0.189072	-1.27918	-1.80553	-2.40918	-1.43486	1.36184	-2.39952	-2.43279	-2.27248	-1.52217		6.75555	-4.3954	-3.817	-4.82875	-4.18571	-5.31134	-4.53645	-3.9822	-4.9585	-4.48476	-3.92109
		6.76579	0.0702057	-1.30201	-2.01784	-2.50893	-1.566	1.13433	-2.47056	-2.47484	-2.44258	-1.64548		6.76579	-4.27278	-3.77877	-4.78055	-4.10848	-5.41438	-4.44068	-3.94276	-4.95359	-4.57439	-3.95798
		6.77603	0.0171471	-1.44741	-2.11348	-2.59237	-1.7287	0.901569	-2.52835	-2.67042	-2.52296	-1.70847		6.77603	-4.21964	-3.72506	-4.58339	-4.05405	-5.15529	-4.3431	-3.92383	-4.89398	-4.53697	-3.93325
		6.78627	-0.0650749	-1.69567	-2.1193	-2.66228	-1.90248	0.796181	-2.53643	-2.77027	-2.56049	-1.87071		6.78627	-4.17368	-3.71618	-4.50636	-3.96899	-4.74192	-4.36465	-3.94576	-4.84063	-4.44783	-3.86396
		6.79651	-0.134384	-1.77552	-2.22606	-2.74703	-1.92913	0.63776	-2.60328	-2.81345	-2.64491	-1.88748		6.79651	-4.20342	-3.67842	-4.49994	-3.92899	-4.84646	-4.3414	-3.96682	-4.81636	-4.33435	-3.70525
		6.80675	-0.302013	-1.8274	-2.31572	-2.75055	-1.9366	0.532616	-2.64656	-2.86679	-2.6904	-1.94317		6.80675	-4.24784	-3.7262	-4.5914	-3.96183	-4.94199	-4.33859	-3.93781	-4.67213	-4.26714	-3.71595
		6.81699	-0.45422	-1.83838	-2.46485	-2.83242	-2.04598	0.367264	-2.74052	-2.91372	-2.74683	-1.97695		6.81699	-4.15369	-3.66142	-4.5302	-3.98589	-4.98286	-4.37351	-3.83834	-4.64789	-4.25648	-3.84847
		6.82723	-0.530212	-1.86355	-2.43587	-2.74442	-2.13564	0.203266	-2.7804	-2.99911	-2.87219	-2.06775		6.82723	-4.06651	-3.61362	-4.48505	-4.02437	-4.94453	-4.3139	-3.78059	-4.58754	-4.1973	-3.85875
		6.83747	-0.584953	-1.87601	-2.55986	-2.86628	-2.28488	0.116924	-2.83962	-3.05015	-2.89062	-2.18938		6.83747	-4.07677	-3.59245	-4.37029	-3.94216	-4.9044	-4.19629	-3.66628	-4.49253	-4.1319	-3.76622
		6.84771	-0.657997	-1.85116	-2.68479	-3.03039	-2.34924	-0.0238991	-2.90486	-3.13389	-2.96545	-2.20012		6.84771	-4.09413	-3.51075	-4.32706	-3.86985	-4.99295	-4.04338	-3.56189	-4.3717	-4.03966	-3.62502
		6.85795	-0.861736	-1.96832	-2.7095	-3.16525	-2.46462	-0.196835	-3.08035	-3.21838	-2.97378	-2.22482		6.85795	-4.11182	-3.49523	-4.39401	-3.83601	-5.04287	-4.05064	-3.46157	-4.31072	-3.98734	-3.61492
		6.86819	-0.974342	-2.08401	-2.67367	-3.16257	-2.53712	-0.332779	-3.14655	-3.34748	-3.02843	-2.34781		6.86819	-4.16995	-3.45375	-4.50195	-3.86755	-4.98156	-4.01882	-3.5528	-4.35577	-3.81583	-3.52704
		6.87843	-1.14753	-2.19347	-2.70613	-3.19448	-2.54565	-0.308723	-3.24461	-3.36639	-3.11508	-2.46333		6.87843	-4.26471	-3.37493	-4.38852	-3.77237	-4.93964	-3.95891	-3.60233	-4.2477	-3.82018	-3.52909
		6.88867	-1.27906	-2.23386	-2.77538	-3.19876	-2.52699	-0.372524	-3.3512	-3.4231	-3.12191	-2.5124		6.88867	-4.23971	-3.37112	-4.29007	-3.85796	-5.02712	-3.92923	-3.50444	-4.24577	-3.82184	-3.49932
		6.89891	-1.27172	-2.2497	-2.89909	-3.38806	-2.70953	-0.405735	-3.34282	-3.45629	-3.04559	-2.57378		6.89891	-4.20169	-3.51134	-4.2571	-3.91188	-4.9015	-3.96851	-3.4577	-4.29195	-3.74128	-3.42776
		6.90915	-1.33141	-2.27375	-2.94062	-3.50719	-2.7919	-0.50312	-3.37977	-3.36574	-3.00628	-2.69729		6.90915	-4.13347	-3.60437	-4.06459	-3.86716	-4.80321	-3.94162	-3.49688	-4.21065	-3.72719	-3.32401
		6.91939	-1.51028	-2.29423	-2.99641	-3.46795	-2.81988	-0.595554	-3.39391	-3.36023	-3.07123	-2.82728		6.91939	-4.07529	-3.53642	-3.99606	-3.80271	-4.81263	-3.95089	-3.51101	-4.2313	-3.60032	-3.18975
		6.92963	-1.7477	-2.4192	-3.0042	-3.42586	-2.86668	-0.731358	-3.5159	-3.35751	-3.199	-2.93418		6.92963	-3.93512	-3.55592	-4.07363	-3.75743	-4.73824	-3.88536	-3.47484	-4.31361	-3.50908	-3.22212
		6.93987	-1.80938	-2.36988	-3.10303	-3.38638	-2.7882	-0.865089	-3.48362	-3.48772	-3.17002	-2.96869		6.93987	-3.9102	-3.47679	-4.18053	-3.78192	-4.63358	-3.84141	-3.44357	-4.21913	-3.41918	-3.26666
		6.95011	-1.86279	-2.32857	-3.18638	-3.31354	-2.84933	-0.955353	-3.44116	-3.63058	-3.21571	-3.0443		6.95011	-3.93668	-3.48107	-4.14718	-3.72819	-4.64767	-3.85512	-3.35236	-4.19103	-3.30238	-3.18843
		6.96035	-1.90632	-2.40793	-3.35116	-3.39314	-2.83945	-0.98246	-3.43102	-3.68704	-3.31482	-3.10627		6.96035	-3.92028	-3.37077	-4.15377	-3.67551	-4.53777	-3.86977	-3.30208	-4.12733	-3.33525	-3.23877
		6.97059	-2.00135	-2.43839	-3.45638	-3.41225	-2.94152	-1.00832	-3.54736	-3.57525	-3.32481	-3.15442		6.97059	-3.81327	-3.34683	-4.11549	-3.58384	-4.48977	-3.83722	-3.34694	-4.06589	-3.36148	-3.25252
		6.98083	-2.22039	-2.50177	-3.45239	-3.44067	-3.03192	-1.17669	-3.5889	-3.52627	-3.3816	-3.19845		6.98083	-3.85455	-3.36826	-4.13846	-3.52816	-4.6347	-3.74821	-3.33324	-4.05692	-3.35418	-3.14678
		6.99107	-2.31638	-2.60464	-3.48712	-3.50872	-2.97941	-1.35594	-3.65122	-3.60714	-3.4391	-3.26862		6.99107	-3.83392	-3.38136	-4.05143	-3.44609	-4.61696	-3.59557	-3.42229	-4.02139	-3.40138	-3.03122
		7.00131	-2.35437	-2.64805	-3.46685	-3.47058	-3.00822	-1.40862	-3.64817	-3.71892	-3.43744	-3.33718		7.00131	-3.7712	-3.31315	-3.99393	-3.45446	-4.53359	-3.61081	-3.37144	-4.05361	-3.32951	-2.94759
		7.01155	-2.41298	-2.70889	-3.44529	-3.50935	-3.12451	-1.48666	-3.7069	-3.81236	-3.40559	-3.33506		7.01155	-3.69677	-3.30886	-3.98158	-3.52174	-4.44798	-3.58646	-3.32975	-4.02711	-3.189	-2.91011
		7.02179	-2.59935	-2.86766	-3.40994	-3.5308	-3.10892	-1.59878	-3.78005	-3.80114	-3.37824	-3.34196		7.02179	-3.62823	-3.3585	-3.95998	-3.44754	-4.36412	-3.67567	-3.39765	-4.03122	-3.23027	-3.01833
		7.03203	-2.68689	-3.07184	-3.44278	-3.60862	-3.05751	-1.7177	-3.66295	-3.7816	-3.3336	-3.4248		7.03203	-3.59899	-3.36443	-3.9413	-3.34976	-4.32166	-3.63201	-3.39319	-4.02165	-3.25373	-2.91901
		7.04227	-2.75091	-3.09178	-3.53779	-3.64234	-3.15082	-1.8051	-3.57686	-3.82281	-3.44083	-3.382		7.04227	-3.64644	-3.22646	-3.90547	-3.20203	-4.29572	-3.55262	-3.21327	-4.01762	-3.21084	-2.7872
		7.05251	-2.82509	-3.03058	-3.68961	-3.59093	-3.23131	-1.86978	-3.64662	-3.84911	-3.52518	-3.26424		7.05251	-3.63191	-3.07557	-3.84393	-3.15977	-4.27991	-3.47304	-3.02626	-3.93124	-3.19622	-2.80935
		7.06275	-2.95142	-2.99288	-3.78147	-3.66121	-3.34168	-1.86878	-3.83011	-3.86173	-3.54658	-3.33374		7.06275	-3.50491	-3.16153	-3.9097	-3.15854	-4.23125	-3.50076	-2.91585	-3.72136	-3.14496	-2.90574
		7.07299	-2.98081	-3.05198	-3.86687	-3.78696	-3.40893	-1.99375	-3.92804	-3.8395	-3.5149	-3.43476		7.07299	-3.45904	-3.0827	-3.90847	-3.19598	-4.2641	-3.48792	-2.90741	-3.74995	-3.06581	-2.77565
		7.08323	-2.96981	-3.18649	-3.84922	-3.96012	-3.46758	-2.10039	-3.90479	-3.88884	-3.50267	-3.5184		7.08323	-3.43774	-3.08127	-3.76814	-3.2129	-4.33595	-3.49643	-3.06283	-3.84536	-3.1071	-2.67093
		7.09347	-2.9325	-3.25569	-3.86106	-4.0397	-3.54602	-2.29351	-3.93552	-3.91327	-3.54618	-3.5279		7.09347	-3.42435	-3.0552	-3.62426	-3.18523	-4.37769	-3.48038	-3.06403	-3.93295	-3.17585	-2.74707
		7.10371	-2.90677	-3.17936	-3.85538	-4.03336	-3.52639	-2.36319	-4.04972	-3.94627	-3.57556	-3.50719		7.10371	-3.42971	-3.06459	-3.54972	-3.2254	-4.29915	-3.38504	-3.0676	-3.8864	-3.18557	-2.77247
		7.11395	-3.03857	-3.19633	-3.90715	-4.02418	-3.66077	-2.4685	-4.07059	-4.07619	-3.57708	-3.48463		7.11395	-3.43311	-3.07954	-3.5948	-3.19061	-4.24994	-3.36856	-3.06052	-3.73722	-3.13534	-2.74588
		7.12419	-3.06173	-3.16989	-4.06159	-4.05426	-3.71236	-2.46429	-4.00848	-4.17439	-3.63191	-3.56133		7.12419	-3.38694	-3.12761	-3.57247	-3.09204	-4.14749	-3.23147	-3.00225	-3.60898	-3.02106	-2.71056
		7.13443	-3.16378	-3.13105	-4.12315	-4.05325	-3.7623	-2.47647	-4.01076	-3.82172	-3.71362	-3.59402		7.13443	-3.34424	-3.07156	-3.4982	-3.07218	-4.12522	-3.28333	-2.97796	-3.6074	-2.96163	-2.82237
		7.14467	-3.27095	-3.1767	-4.057	-4.06876	-3.755	-2.46624	-4.06996	-3.81221	-3.82978	-3.62511		7.14467	-3.29339	-2.9167	-3.53855	-3.01054	-4.06864	-3.21061	-3.02895	-3.71907	-2.95719	-2.78447
		7.15491	-3.44316	-3.34488	-4.06834	-4.05761	-3.708	-2.46236	-4.11443	-3.99397	-3.74884	-3.66315		7.15491	-3.21242	-2.82368	-3.55148	-2.93115	-4.01489	-3.25661	-3.0729	-3.80763	-2.85215	-2.7585
		7.16515	-3.49356	-3.40981	-4.1609	-4.10706	-3.59859	-2.44745	-4.08777	-4.02585	-3.84761	-3.74282		7.16515	-3.10901	-2.79268	-3.61451	-2.95631	-3.90958	-3.23674	-3.02055	-3.79397	-2.88055	-2.64098
		7.17539	-3.44678	-3.32987	-4.201	-4.09953	-3.64093	-2.58053	-4.08739	-4.13625	-3.84007	-3.80344		7.17539	-3.09638	-2.80399	-3.48228	-2.9605	-3.86631	-3.21022	-2.94589	-3.64274	-2.89619	-2.66131
		7.18563	-3.47485	-3.35478	-4.1263	-4.03625	-3.73482	-2.7269	-4.11008	-4.21992	-3.80473	-3.77607		7.18563	-3.09402	-2.76509	-3.41865	-2.95955	-3.76376	-3.10722	-2.86816	-3.63097	-2.88311	-2.62558
		7.19587	-3.46987	-3.42983	-4.20534	-3.97173	-3.64043	-2.81464	-4.14495	-4.33738	-3.82094	-3.8442		7.19587	-2.9668	-2.77892	-3.41003	-2.92262	-3.78583	-2.93182	-2.84237	-3.68832	-2.94526	-2.52334
		7.20611	-3.4649	-3.39893	-4.33418	-3.98609	-3.68464	-2.82124	-4.13754	-4.40704	-3.76335	-3.79457		7.20611	-2.90469	-2.7448	-3.45599	-2.75756	-3.84513	-2.94742	-2.87734	-3.6521	-2.92501	-2.41965
		7.21635	-3.57119	-3.46413	-4.2756	-4.12678	-3.69653	-2.82966	-4.09121	-4.42051	-3.83106	-3.90479		7.21635	-2.85085	-2.76381	-3.42344	-2.67875	-3.7197	-3.01095	-2.8987	-3.47809	-2.92011	-2.43161
		7.22659	-3.66478	-3.53793	-4.19299	-4.09808	-3.70554	-2.90314	-4.02769	-4.4842	-3.83552	-3.98763		7.22659	-2.90662	-2.6543	-3.31744	-2.64212	-3.60668	-3.04037	-2.87468	-3.40232	-2.85974	-2.4365
		7.23683	-3.63222	-3.55686	-4.09679	-4.097	-3.75193	-2.98218	-3.98194	-4.44132	-3.83235	-3.96916		7.23683	-3.01794	-2.62729	-3.32274	-2.67045	-3.57402	-3.05956	-2.76821	-3.37164	-2.82971	-2.40167
		7.24707	-3.71806	-3.56967	-4.08944	-4.08286	-3.8426	-2.97826	-4.04371	-4.39771	-3.86361	-4.11424		7.24707	-2.97269	-2.66283	-3.33501	-2.69638	-3.55415	-3.10043	-2.69555	-3.37114	-2.83436	-2.33575
		7.25731	-3.79815	-3.54082	-4.1287	-4.20923	-3.91837	-3.00484	-4.15228	-4.40994	-3.81735	-4.17921		7.25731	-2.9713	-2.66909	-3.29413	-2.72939	-3.55662	-3.00594	-2.65741	-3.26635	-2.89224	-2.36789
		7.26755	-3.8459	-3.52594	-4.17685	-4.20931	-3.9352	-3.10416	-4.17265	-4.46666	-3.76839	-4.21246		7.26755	-2.90536	-2.66154	-3.20977	-2.75249	-3.50789	-2.91945	-2.65907	-3.2896	-2.89376	-2.38522
		7.27779	-3.8103	-3.61715	-4.29704	-4.23506	-3.96201	-3.25808	-4.18464	-4.42957	-3.74397	-4.13326		7.27779	-2.89834	-2.67736	-3.28695	-2.76393	-3.50271	-2.92141	-2.6455	-3.2915	-2.80599	-2.24617
		7.28803	-3.87556	-3.68062	-4.3948	-4.27453	-3.99559	-3.25661	-4.20979	-4.47787	-3.74542	-4.1043		7.28803	-2.89295	-2.59096	-3.31655	-2.67994	-3.47821	-2.97351	-2.62955	-3.23828	-2.80032	-2.1637
		7.29827	-3.997	-3.62049	-4.36581	-4.23582	-3.96754	-3.32817	-4.09417	-4.50506	-3.7249	-4.1674		7.29827	-2.88035	-2.54611	-3.26358	-2.63403	-3.48224	-2.88035	-2.63999	-3.09266	-2.78488	-2.10327
		7.30851	-4.10551	-3.63259	-4.35439	-4.15744	-3.88288	-3.33426	-3.97869	-4.46505	-3.70642	-4.17592		7.30851	-2.77532	-2.5286	-3.21523	-2.61134	-3.37299	-2.67991	-2.57033	-3.1795	-2.74842	-2.11444
		7.31875	-4.13257	-3.64753	-4.35881	-4.10942	-3.88481	-3.26456	-3.96126	-4.39979	-3.6879	-4.15613		7.31875	-2.67259	-2.53867	-3.19306	-2.59013	-3.42576	-2.5864	-2.51772	-3.22033	-2.62422	-2.0721
		7.32899	-4.16044	-3.76369	-4.287	-4.22744	-3.89604	-3.3244	-3.91022	-4.47486	-3.77642	-4.05344		7.32899	-2.74569	-2.44571	-3.10314	-2.58087	-3.41314	-2.62144	-2.46019	-3.24103	-2.60759	-2.11747
		7.33923	-4.11304	-3.77402	-4.35377	-4.23778	-3.96804	-3.48653	-3.88059	-4.60943	-3.93385	-4.07511		7.33923	-2.65607	-2.30676	-3.03373	-2.49158	-3.36734	-2.73006	-2.4267	-3.11829	-2.54131	-2.156
		7.34947	-4.09274	-3.73714	-4.40401	-4.19382	-4.0011	-3.54984	-3.91518	-4.67146	-3.89647	-4.01915		7.34947	-2.60928	-2.2741	-2.96902	-2.55423	-3.36307	-2.68517	-2.42229	-3.10183	-2.41919	-2.11964
		7.35971	-4.06393	-3.64222	-4.42366	-4.2662	-3.93919	-3.5413	-3.98477	-4.57396	-3.90707	-4.01966		7.35971	-2.56571	-2.31901	-2.92615	-2.51492	-3.34652	-2.51427	-2.38074	-3.12079	-2.38267	-2.03389
		7.36995	-4.07148	-3.51566	-4.3873	-4.36548	-3.8808	-3.50813	-3.94074	-4.672	-3.80392	-3.98159		7.36995	-2.54541	-2.33167	-2.95917	-2.45169	-3.25653	-2.48395	-2.33468	-3.04797	-2.54588	-2.04031
		7.38019	-4.09472	-3.45218	-4.39581	-4.34148	-3.81762	-3.53068	-3.86601	-4.80134	-3.94928	-4.02864		7.38019	-2.57775	-2.38232	-2.95564	-2.42965	-3.21949	-2.57734	-2.37004	-2.9432	-2.52114	-2.06977
		7.39043	-4.11168	-3.42318	-4.42461	-4.29123	-3.88267	-3.56843	-3.8835	-4.82487	-3.95025	-4.1539		7.39043	-2.54701	-2.36097	-2.89225	-2.47754	-3.19	-2.53113	-2.39161	-2.95097	-2.34874	-1.99123
		7.40067	-4.11803	-3.49326	-4.35125	-4.29991	-3.90814	-3.73802	-3.85517	-4.80563	-3.93173	-4.18591		7.40067	-2.56488	-2.31708	-2.88955	-2.34626	-3.23705	-2.49059	-2.4404	-2.97574	-2.28179	-1.8917
		7.41091	-4.06899	-3.61006	-4.27665	-4.24658	-3.91868	-3.74207	-3.8208	-4.87121	-3.93437	-4.21206		7.41091	-2.61839	-2.22462	-2.82949	-2.32317	-3.27352	-2.53281	-2.49117	-2.89256	-2.35316	-1.79215
		7.42115	-4.05656	-3.49898	-4.17021	-4.23323	-3.98842	-3.76837	-3.8025	-4.78562	-3.96534	-4.13734		7.42115	-2.50398	-2.24506	-2.65876	-2.28537	-3.12732	-2.56723	-2.44073	-2.86449	-2.34021	-1.88971
		7.43139	-4.09064	-3.50593	-4.23857	-4.16629	-4.04862	-3.83988	-3.9155	-4.69307	-3.97249	-4.22744		7.43139	-2.46936	-2.16823	-2.68835	-2.34412	-3.01381	-2.42867	-2.31814	-2.8149	-2.18447	-1.9982
		7.44163	-4.1118	-3.60209	-4.31639	-4.09593	-4.17568	-3.70682	-3.8655	-4.76386	-3.87058	-4.2081		7.44163	-2.54374	-2.1032	-2.69278	-2.43707	-3.01425	-2.39142	-2.26382	-2.86493	-2.05503	-1.97685
		7.45187	-4.14825	-3.69457	-4.15281	-4.2054	-4.08377	-3.6843	-3.75703	-4.85708	-3.77399	-4.17057		7.45187	-2.58053	-2.07167	-2.66935	-2.32913	-3.08532	-2.40351	-2.22898	-2.87046	-2.10391	-1.86464
		7.46211	-4.19993	-3.67975	-4.03952	-4.20744	-4.12497	-3.76173	-3.72521	-5.028	-3.67924	-4.1537		7.46211	-2.63623	-2.02097	-2.65459	-2.28406	-3.10627	-2.38403	-2.13266	-2.82425	-2.25621	-1.80499
		7.47235	-4.20577	-3.69884	-4.12434	-4.17742	-4.17396	-3.66001	-3.70933	-5.05494	-3.626	-4.11566		7.47235	-2.49096	-2.00591	-2.56556	-2.24604	-3.00156	-2.31069	-2.08456	-2.80032	-2.18851	-1.85481
		7.48259	-4.26313	-3.5965	-4.05301	-4.16536	-4.07222	-3.65885	-3.7202	-4.93831	-3.56758	-4.23033		7.48259	-2.47812	-2.09901	-2.61764	-2.23439	-2.84622	-2.27377	-2.09854	-2.7588	-2.18903	-1.83055
		7.49283	-4.28507	-3.61525	-4.00417	-4.13334	-4.06769	-3.79667	-3.69374	-4.86413	-3.48301	-4.17339		7.49283	-2.50978	-2.12105	-2.50358	-2.19808	-2.85906	-2.27737	-2.10084	-2.6147	-2.25939	-1.80193
		7.50307	-4.20921	-3.53321	-4.03329	-4.07795	-3.98516	-3.83917	-3.62633	-4.82079	-3.42413	-4.17126		7.50307	-2.52293	-2.03281	-2.4403	-2.17462	-2.81817	-2.24284	-2.09526	-2.62969	-2.21453	-1.78352
		7.51331	-4.16535	-3.52222	-4.01665	-3.96487	-3.76155	-3.76173	-3.63605	-4.85745	-3.5006	-4.17691		7.51331	-2.40484	-2.00128	-2.44334	-2.1978	-2.78791	-2.2033	-2.06834	-2.70866	-2.23659	-1.80438
		7.52355	-4.15476	-3.60254	-3.98843	-4.00402	-3.7204	-3.8156	-3.58772	-4.85958	-3.41843	-4.10916		7.52355	-2.34245	-2.03692	-2.43272	-2.14685	-2.72803	-2.13195	-2.06802	-2.6739	-2.20121	-1.82539
		7.53379	-4.11174	-3.59496	-4.02031	-3.98001	-3.78103	-3.9446	-3.58223	-4.82115	-3.41377	-4.13254		7.53379	-2.44778	-2.09611	-2.43264	-2.13493	-2.74418	-2.13029	-2.16759	-2.65911	-2.13891	-1.81405
		7.54403	-4.14442	-3.58389	-4.08868	-3.99753	-3.87047	-4.02807	-3.52559	-4.74304	-3.42125	-4.03403		7.54403	-2.53257	-2.01286	-2.36539	-2.165	-2.8483	-2.25857	-2.10957	-2.62627	-2.0137	-1.81504
		7.55427	-4.15921	-3.58168	-4.09042	-3.92084	-3.88096	-4.02075	-3.57418	-4.77391	-3.38494	-3.89055		7.55427	-2.48844	-2.02189	-2.33408	-2.21693	-2.79726	-2.18077	-2.00326	-2.56594	-1.93873	-1.77528
		7.56451	-4.17884	-3.57086	-4.01363	-3.86177	-3.79272	-3.99222	-3.56382	-4.84854	-3.34188	-3.87656		7.56451	-2.40615	-2.00709	-2.38094	-2.17835	-2.88686	-2.06858	-2.0451	-2.65044	-2.00372	-1.74121
		7.57475	-4.16174	-3.54591	-3.97837	-3.94911	-3.81636	-3.93337	-3.50405	-4.87898	-3.38217	-3.94594		7.57475	-2.37349	-1.96918	-2.37502	-2.06969	-2.91029	-2.07563	-1.97495	-2.61872	-2.0508	-1.67344
		7.58499	-4.1773	-3.58574	-3.94932	-3.9788	-3.86638	-3.92248	-3.38908	-4.84709	-3.37102	-4.02629		7.58499	-2.36036	-1.91311	-2.38666	-2.01373	-2.74436	-2.28603	-2.05959	-2.56144	-2.0709	-1.62758
		7.59523	-4.17446	-3.57719	-3.98234	-4.0094	-3.87396	-3.94833	-3.32659	-4.86245	-3.36322	-4.09618		7.59523	-2.27595	-1.87992	-2.49308	-2.00173	-2.60624	-2.58311	-1.99595	-2.53083	-1.91954	-1.64862
		7.60547	-4.15312	-3.49187	-3.88349	-3.88132	-3.80181	-3.98312	-3.36124	-4.86104	-3.326	-4.18617		7.60547	-2.22956	-1.9081	-2.39487	-2.00511	-2.63073	-2.35475	-1.91994	-2.45627	-1.77516	-1.61357
		7.61571	-3.9847	-3.45354	-3.7772	-3.86891	-3.76543	-4.00266	-3.31294	-4.73176	-3.18629	-4.27121		7.61571	-2.19353	-1.94918	-2.34355	-1.98323	-2.74231	-2.08589	-2.0519	-2.33031	-1.83497	-1.51469
		7.62595	-3.97583	-3.50631	-3.82265	-3.83347	-3.70452	-4.02943	-3.34054	-4.66617	-3.15961	-4.2623		7.62595	-2.17666	-1.94402	-2.42671	-2.03618	-2.77026	-1.94563	-1.94507	-2.29706	-1.85328	-1.58756
		7.63619	-3.93461	-3.44118	-3.82368	-3.79761	-3.61332	-3.96956	-3.25503	-4.73382	-3.09643	-4.14764		7.63619	-2.1459	-1.92287	-2.4781	-2.0592	-2.7487	-1.81283	-1.82308	-2.24513	-1.75566	-1.52083
		7.64643	-3.97712	-3.43519	-3.90121	-3.7502	-3.67128	-3.91117	-3.18696	-4.7681	-3.06186	-4.08157		7.64643	-2.08747	-1.86187	-2.43402	-1.93092	-2.61997	-1.81413	-1.75825	-2.26198	-1.74697	-1.46589
		7.65667	-3.97529	-3.44399	-3.84458	-3.77039	-3.67106	-3.8753	-3.10408	-4.71636	-3.01003	-4.00487		7.65667	-2.15	-1.80389	-2.30724	-1.98025	-2.74092	-1.87543	-1.83257	-2.27627	-1.79005	-1.47935
		7.66691	-3.89324	-3.3981	-3.80558	-3.69248	-3.66126	-3.81902	-3.0853	-4.69202	-2.9042	-3.90532		7.66691	-2.10367	-1.7424	-2.22081	-1.94727	-2.69883	-1.84644	-1.90151	-2.26532	-1.76336	-1.39499
		7.67715	-3.85369	-3.38115	-3.73726	-3.68736	-3.62787	-3.86159	-3.03928	-4.7065	-2.88922	-3.94555		7.67715	-1.99776	-1.69471	-2.28731	-2.00454	-2.57475	-1.67566	-1.78677	-2.16378	-1.75086	-1.32061
		7.68739	-3.972	-3.35327	-3.64247	-3.60321	-3.62609	-3.84388	-3.00831	-4.69135	-2.86249	-4.00869		7.68739	-2.03783	-1.66617	-2.35707	-1.99459	-2.4568	-1.6562	-1.7088	-2.27573	-1.75961	-1.3651
		7.69763	-4.04696	-3.41317	-3.67076	-3.59212	-3.66896	-3.85754	-2.97095	-4.67006	-2.79272	-3.92117		7.69763	-1.97701	-1.67212	-2.39124	-1.9143	-2.47716	-1.72793	-1.69099	-2.26194	-1.70538	-1.41288
		7.70787	-3.96013	-3.33498	-3.65104	-3.60403	-3.69954	-3.90026	-2.94582	-4.67419	-2.75863	-3.88274		7.70787	-1.99335	-1.56194	-2.44957	-1.91864	-2.54181	-1.6864	-1.67483	-2.25144	-1.70253	-1.45868
		7.71811	-3.88351	-3.31044	-3.61053	-3.53741	-3.6375	-3.94968	-2.97751	-4.65244	-2.68727	-3.91938		7.71811	-1.93587	-1.45226	-2.3377	-1.92041	-2.46116	-1.70156	-1.76875	-2.26966	-1.73296	-1.46213
		7.72835	-3.83307	-3.18075	-3.60963	-3.51036	-3.56359	-3.94191	-3.00905	-4.65531	-2.66365	-3.98446		7.72835	-1.87305	-1.54568	-2.24849	-1.87253	-2.47341	-1.69546	-1.76554	-2.26024	-1.7486	-1.38281
		7.73859	-3.78515	-3.13412	-3.54193	-3.52168	-3.45438	-3.94178	-2.97465	-4.6233	-2.68568	-3.9471		7.73859	-1.91985	-1.74743	-2.14714	-1.79583	-2.37989	-1.61424	-1.78633	-2.17839	-1.64428	-1.33341
		7.74883	-3.72375	-3.08489	-3.60321	-3.59983	-3.41484	-3.89091	-2.98397	-4.55946	-2.62629	-3.90232		7.74883	-1.96529	-1.74188	-2.08638	-1.73956	-2.38805	-1.6167	-1.72153	-2.14298	-1.58061	-1.35833
		7.75907	-3.6825	-3.2053	-3.60125	-3.55522	-3.30173	-3.78774	-2.9558	-4.56036	-2.59003	-3.8261		7.75907	-1.9362	-1.5303	-2.18254	-1.76149	-2.38698	-1.73286	-1.78579	-2.13541	-1.58724	-1.36174
		7.76931	-3.65818	-3.23487	-3.59536	-3.42751	-3.33698	-3.74464	-2.96764	-4.60398	-2.60614	-3.78439		7.76931	-1.79712	-1.52077	-2.16759	-1.83747	-2.37027	-1.74905	-1.76439	-2.14053	-1.67538	-1.35111
		7.77955	-3.56731	-3.29972	-3.56829	-3.44038	-3.344	-3.7361	-2.87445	-4.55416	-2.55667	-3.74064		7.77955	-1.79927	-1.45454	-2.23542	-1.83648	-2.33609	-1.74557	-1.79105	-2.06657	-1.68622	-1.31608
		7.78979	-3.53123	-3.25745	-3.62562	-3.40215	-3.32495	-3.68871	-2.9386	-4.55067	-2.49208	-3.8203		7.78979	-1.79992	-1.514	-2.25755	-1.6909	-2.33867	-1.76538	-1.79986	-2.05835	-1.74872	-1.27967
		7.80003	-3.68038	-3.17795	-3.59837	-3.39621	-3.26313	-3.66098	-2.97977	-4.52534	-2.38801	-3.79709		7.80003	-1.78662	-1.60281	-2.25456	-1.64818	-2.22472	-1.70131	-1.65898	-2.0448	-1.65673	-1.23088
		7.81027	-3.79051	-3.12132	-3.51421	-3.43512	-3.20019	-3.55652	-2.88462	-4.53099	-2.27333	-3.63912		7.81027	-1.78272	-1.60612	-2.2281	-1.62135	-2.12955	-1.63909	-1.64548	-2.07899	-1.5293	-1.34803
		7.82051	-3.91898	-3.15105	-3.52647	-3.28846	-3.27464	-3.50803	-2.85563	-4.48758	-2.16956	-3.65156		7.82051	-1.75195	-1.6045	-2.23295	-1.64192	-2.14418	-1.55038	-1.5766	-2.14103	-1.48316	-1.3157
		7.83075	-3.89456	-3.14085	-3.44165	-3.31881	-3.19899	-3.50481	-2.7858	-4.52702	-2.12733	-3.63819		7.83075	-1.80758	-1.63646	-2.17374	-1.77333	-2.17828	-1.55787	-1.50154	-2.10349	-1.53228	-1.32939
		7.84099	-3.81497	-3.11543	-3.4221	-3.22183	-3.02044	-3.62019	-2.79058	-4.38742	-2.09714	-3.7039		7.84099	-1.78649	-1.57307	-2.02042	-1.72438	-2.10477	-1.506	-1.44935	-2.02161	-1.60495	-1.27291
		7.85123	-3.72623	-2.98726	-3.41168	-3.2318	-3.01991	-3.59605	-2.80158	-4.38129	-2.05295	-3.69514		7.85123	-1.75819	-1.54762	-1.93494	-1.57915	-2.01135	-1.52524	-1.33365	-1.9827	-1.62677	-1.15987
		7.86147	-3.75297	-2.89273	-3.40763	-3.21812	-2.9924	-3.7018	-2.74286	-4.29692	-2.05511	-3.64543		7.86147	-1.77715	-1.51642	-1.98336	-1.54737	-2.03361	-1.47556	-1.34831	-1.87989	-1.57978	-1.12774
		7.87171	-3.79313	-2.96061	-3.5098	-3.179	-3.03099	-3.67886	-2.65274	-4.32697	-1.94927	-3.50724		7.87171	-1.79321	-1.4196	-2.01	-1.58387	-1.99929	-1.43307	-1.45438	-1.83821	-1.54046	-1.09595
		7.88195	-3.67607	-3.03555	-3.49127	-3.1554	-2.98851	-3.69433	-2.57442	-4.34836	-1.92898	-3.40017		7.88195	-1.6452	-1.40622	-1.87421	-1.60707	-1.89217	-1.43398	-1.47709	-1.84465	-1.45713	-1.1449
		7.89219	-3.56594	-2.95863	-3.40733	-3.04013	-3.04299	-3.6281	-2.52715	-4.35825	-1.96031	-3.34715		7.89219	-1.60804	-1.3068	-1.93369	-1.67533	-1.89632	-1.34718	-1.56175	-1.71949	-1.41393	-1.26208
		7.90243	-3.45401	-2.94846	-3.35493	-3.03045	-3.03187	-3.6596	-2.47503	-4.34209	-2.03015	-3.37556		7.90243	-1.57027	-1.31449	-1.96667	-1.6945	-1.91317	-1.3228	-1.58938	-1.60368	-1.3961	-1.27617
		7.91267	-3.4322	-2.93217	-3.29918	-2.93079	-2.97102	-3.65735	-2.42149	-4.32862	-1.94582	-3.33608		7.91267	-1.55421	-1.34891	-1.90479	-1.65314	-1.8566	-1.34679	-1.46902	-1.58974	-1.4432	-1.10239
		7.92291	-3.53186	-2.90507	-3.21654	-2.91854	-2.96167	-3.54944	-2.44809	-4.34507	-1.74137	-3.31633		7.92291	-1.62631	-1.41887	-1.93209	-1.56487	-1.8665	-1.38597	-1.37187	-1.64067	-1.42589	-1.02151
		7.93315	-3.62598	-2.81653	-3.11145	-2.97352	-2.93159	-3.5293	-2.47439	-4.25862	-1.66453	-3.27326		7.93315	-1.59879	-1.48364	-1.89029	-1.51716	-1.94324	-1.38617	-1.31153	-1.63814	-1.41164	-0.99987
		7.94339	-3.46385	-2.73134	-3.06546	-3.01868	-2.94987	-3.49048	-2.39486	-4.2617	-1.9352	-3.24326		7.94339	-1.55974	-1.51889	-1.88616	-1.50763	-1.9946	-1.39309	-1.38842	-1.65204	-1.51923	-1.02998
		7.95363	-3.30612	-2.71693	-3.03901	-3.06093	-2.91073	-3.535	-2.28079	-4.30013	-1.98795	-3.27683		7.95363	-1.46247	-1.37175	-1.82265	-1.55894	-1.9381	-1.37376	-1.43968	-1.58926	-1.49569	-0.932709
		7.96387	-3.37616	-2.80388	-3.03057	-3.02037	-2.88106	-3.55253	-2.29887	-4.23184	-1.7225	-3.30183		7.96387	-1.32988	-1.32801	-1.71567	-1.53211	-1.783	-1.37975	-1.34082	-1.54634	-1.41362	-0.981659
		7.97411	-3.39161	-2.67891	-3.07617	-2.92139	-2.89351	-3.56308	-2.32762	-4.0806	-1.53637	-3.23047		7.97411	-1.39257	-1.31284	-1.80194	-1.42991	-1.78691	-1.33583	-1.23483	-1.54627	-1.36267	-1.05156
		7.98435	-3.29177	-2.64929	-2.99052	-2.89434	-2.81002	-3.40566	-2.21364	-4.02874	-1.44295	-3.11983		7.98435	-1.35824	-1.43153	-1.89627	-1.3681	-1.7048	-1.24999	-1.28279	-1.61634	-1.34594	-0.973217
		7.99459	-3.22709	-2.62085	-2.85728	-2.82594	-2.80322	-3.29775	-2.09589	-4.08062	-1.29115	-3.11894		7.99459	-1.26789	-1.409	-1.83824	-1.42696	-1.58287	-1.21254	-1.32359	-1.67525	-1.32716	-0.937157
		8.00483	-3.20583	-2.68106	-2.90453	-2.69064	-2.68609	-3.34317	-2.11161	-4.1872	-1.26158	-3.11218		8.00483	-1.27212	-1.31063	-1.83179	-1.46672	-1.61939	-1.24686	-1.34632	-1.63136	-1.47685	-0.941746
		8.01507	-3.24478	-2.68726	-2.90249	-2.67366	-2.68134	-3.304	-2.14809	-4.24903	-1.16109	-3.06581		8.01507	-1.25178	-1.3099	-1.88605	-1.45846	-1.52581	-1.22419	-1.30212	-1.64662	-1.35025	-1.00446
		8.02531	-3.23817	-2.69507	-2.86153	-2.70047	-2.75434	-3.31269	-2.07697	-4.22835	-1.13145	-2.89947		8.02531	-1.24999	-1.24802	-1.84503	-1.47737	-1.50632	-1.22441	-1.27992	-1.60143	-1.25875	-0.956421
		8.03555	-3.15711	-2.64419	-2.84363	-2.66959	-2.76935	-3.25505	-2.07796	-4.09618	-1.00348	-2.91692		8.03555	-1.28477	-1.13359	-1.74523	-1.38234	-1.54789	-1.26435	-1.23997	-1.4787	-1.25155	-0.889572
		8.04579	-3.22241	-2.64635	-2.89165	-2.68452	-2.63815	-3.26107	-2.0254	-4.06159	-0.922882	-2.95013		8.04579	-1.29729	-1.00925	-1.7667	-1.36517	-1.6259	-1.32826	-1.22402	-1.45047	-1.29525	-0.81052
		8.05603	-3.28621	-2.66232	-2.91621	-2.62727	-2.5551	-3.27581	-1.97634	-4.05962	-0.83078	-2.89944		8.05603	-1.25735	-1.11674	-1.69662	-1.30114	-1.60952	-1.23206	-1.15303	-1.43208	-1.21464	-0.742428
		8.06627	-3.21783	-2.64495	-2.92171	-2.57383	-2.53867	-3.25481	-2.00071	-3.98031	-0.806614	-2.93922		8.06627	-1.29513	-1.16507	-1.79203	-1.31463	-1.64121	-1.03573	-1.13894	-1.47668	-1.19942	-0.768867
		8.07651	-3.1331	-2.65493	-2.88207	-2.53487	-2.50134	-3.25529	-1.94158	-3.95016	-0.762497	-2.92725		8.07651	-1.31503	-1.15884	-1.79122	-1.21732	-1.6985	-0.942497	-1.17728	-1.45049	-1.15891	-0.787441
		8.08675	-3.14606	-2.64513	-2.86814	-2.5299	-2.56689	-3.21042	-1.93346	-3.93948	-0.806198	-2.93316		8.08675	-1.31034	-1.16153	-1.68674	-1.27536	-1.67905	-1.02773	-1.12778	-1.53154	-1.18343	-0.771648
		8.09699	-3.12487	-2.54538	-2.89496	-2.43766	-2.50649	-3.16143	-1.93983	-3.86037	-0.776779	-2.87927		8.09699	-1.30451	-1.18212	-1.66669	-1.33043	-1.6355	-1.08753	-1.05954	-1.55235	-1.15504	-0.725182
		8.10723	-3.05481	-2.40676	-2.91588	-2.36671	-2.48664	-3.17332	-1.79056	-3.7717	-0.78648	-2.71523		8.10723	-1.27552	-1.23134	-1.64848	-1.26975	-1.65241	-0.989731	-1.15635	-1.54968	-1.16378	-0.733978
		8.11747	-3.06632	-2.42838	-2.84564	-2.36246	-2.4402	-3.18481	-1.80341	-3.87574	-0.672207	-2.69415		8.11747	-1.22439	-1.19872	-1.65896	-1.32314	-1.6777	-1.05461	-1.19873	-1.47601	-1.23067	-0.738197
		8.12771	-3.06303	-2.46763	-2.73527	-2.3811	-2.33232	-3.23368	-1.79473	-3.89057	-0.589249	-2.74274		8.12771	-1.23584	-1.23309	-1.54401	-1.37057	-1.52798	-1.11228	-1.19935	-1.37064	-1.26639	-0.796803
		8.13795	-3.07014	-2.5585	-2.72795	-2.50325	-2.32052	-3.20519	-1.78268	-3.86745	-0.533783	-2.7377		8.13795	-1.27932	-1.24001	-1.58091	-1.45354	-1.53893	-1.0673	-1.1325	-1.34614	-1.27848	-0.769753
		8.14819	-2.9771	-2.57183	-2.70641	-2.47923	-2.28745	-3.1479	-1.85654	-3.74969	-0.515827	-2.66989		8.14819	-1.30226	-1.16884	-1.58922	-1.35735	-1.57882	-1.08654	-1.1529	-1.35034	-1.16099	-0.75156
		8.15843	-2.92118	-2.53769	-2.63991	-2.55066	-2.26041	-3.04622	-1.79014	-3.73934	-0.462029	-2.70711		8.15843	-1.24987	-1.18399	-1.59252	-1.30978	-1.55436	-1.09836	-1.24725	-1.33994	-1.16149	-0.726334
		8.16867	-2.85426	-2.49008	-2.64217	-2.50312	-2.19755	-3.03754	-1.71016	-3.68723	-0.378006	-2.70947		8.16867	-1.22575	-1.21396	-1.55028	-1.18793	-1.46338	-1.11557	-1.21905	-1.36279	-1.20295	-0.830086
		8.17891	-2.8607	-2.41037	-2.55553	-2.4657	-2.15244	-3.02948	-1.74644	-3.6573	-0.359577	-2.71093		8.17891	-1.21526	-1.36855	-1.57	-1.15907	-1.40838	-1.01052	-1.18317	-1.39354	-1.19256	-0.860317
		8.18915	-2.84126	-2.34322	-2.56086	-2.41353	-2.15376	-3.07484	-1.70332	-3.60874	-0.270123	-2.61704		8.18915	-1.21079	-1.22927	-1.57434	-1.16367	-1.36984	-1.07106	-1.09433	-1.35825	-1.1669	-0.76236
		8.19939	-2.84774	-2.27943	-2.52996	-2.3506	-2.1743	-3.0178	-1.72731	-3.5402	-0.209614	-2.54333		8.19939	-1.24637	-1.14263	-1.58201	-1.21666	-1.45151	-1.00113	-1.00643	-1.2245	-1.16962	-0.613823
		8.20963	-2.84542	-2.27274	-2.53421	-2.31263	-2.22535	-3.02975	-1.68849	-3.52932	-0.17223	-2.47844		8.20963	-1.28309	-1.13181	-1.58705	-1.14124	-1.43502	-0.99334	-1.04912	-1.33041	-1.09348	-0.57238
		8.21987	-2.84109	-2.23763	-2.46416	-2.2674	-2.09692	-3.04062	-1.62482	-3.56015	-0.130783	-2.36473		8.21987	-1.36393	-1.06997	-1.40342	-1.13837	-1.31946	-0.974003	-1.15918	-1.42569	-1.0917	-0.579277
		8.23011	-2.78633	-2.26006	-2.41643	-2.27806	-2.09249	-2.94479	-1.63361	-3.59172	-0.125641	-2.29926		8.23011	-1.3003	-1.06556	-1.41409	-0.939899	-1.36832	-0.987202	-1.16499	-1.44034	-1.00793	-0.469929
		8.24035	-2.71107	-2.32095	-2.40286	-2.28619	-2.10912	-2.88918	-1.70066	-3.5738	-0.101051	-2.21969		8.24035	-1.28018	-1.10701	-1.40732	-0.986618	-1.31934	-0.997513	-1.21335	-1.46592	-1.06646	-0.471695
		8.25059	-2.6862	-2.29477	-2.44051	-2.26225	-2.08713	-2.89518	-1.66959	-3.54299	0.0192566	-2.29226		8.25059	-1.32991	-1.19099	-1.49221	-1.06765	-1.3754	-0.944916	-1.23158	-1.37551	-1.14005	-0.541275
		8.26083	-2.64186	-2.345	-2.40712	-2.19852	-2.12679	-2.94635	-1.6715	-3.43381	0.0417633	-2.51344		8.26083	-1.27229	-1.21149	-1.62626	-1.09855	-1.44966	-0.878437	-1.30869	-1.35554	-1.18872	-0.695404
		8.27107	-2.5412	-2.28625	-2.40797	-2.23764	-2.03399	-2.9162	-1.77115	-3.42249	0.0847015	-2.50069		8.27107	-1.1061	-1.16565	-1.60726	-1.041	-1.39806	-0.958099	-1.32845	-1.31187	-1.17149	-0.684113
		8.28131	-2.53233	-2.25803	-2.5859	-2.1776	-2.06324	-2.85848	-1.72432	-3.38134	0.187984	-2.55245		8.28131	-1.07738	-1.10125	-1.50504	-0.95118	-1.26489	-1.06207	-1.21334	-1.35638	-1.14962	-0.704842
		8.29155	-2.55531	-2.21819	-2.55791	-2.20119	-2.20443	-2.79029	-1.69189	-3.25099	0.270073	-2.51217		8.29155	-1.16197	-1.17799	-1.37014	-0.961979	-1.25848	-1.14668	-1.19191	-1.30775	-1.0742	-0.741093
		8.30179	-2.60689	-2.18362	-2.51463	-2.24473	-2.24174	-2.79243	-1.62577	-3.17742	0.345592	-2.37101		8.30179	-1.11005	-1.01992	-1.482	-0.999729	-1.30508	-1.12867	-1.28469	-1.34205	-1.07185	-0.590714
		8.31203	-2.61373	-2.16047	-2.46291	-2.26752	-2.13682	-2.87671	-1.55231	-3.16306	0.330811	-2.33135		8.31203	-1.11543	-0.989311	-1.56828	-1.01131	-1.37714	-1.04083	-1.29964	-1.4598	-1.05609	-0.443062
		8.32227	-2.70783	-2.15238	-2.42986	-2.25471	-2.15131	-2.93839	-1.52188	-3.21052	0.363411	-2.35843		8.32227	-1.03828	-1.02006	-1.44244	-1.01012	-1.41837	-1.17261	-1.26933	-1.35058	-1.1694	-0.489082
		8.33251	-2.61842	-2.20367	-2.42325	-2.18206	-2.1316	-2.89507	-1.53774	-3.14533	0.380711	-2.32399		8.33251	-0.921303	-1.00929	-1.27761	-1.01882	-1.32069	-1.02848	-1.24293	-1.30797	-1.22581	-0.519386
		8.34275	-2.47289	-2.19481	-2.43519	-2.11378	-2.20041	-2.80492	-1.55909	-3.09658	0.421791	-2.34405		8.34275	-0.893051	-0.763409	-1.31612	-1.01618	-1.21631	-0.909096	-1.29879	-1.3363	-1.24408	-0.522549
		8.35299	-2.46635	-2.19483	-2.36794	-2.16335	-2.12518	-2.79624	-1.54758	-3.10391	0.456959	-2.35005		8.35299	-0.910225	-0.638016	-1.34696	-0.989479	-1.15841	-0.907951	-1.36879	-1.32512	-1.19092	-0.523312
		8.36323	-2.38461	-2.08016	-2.23162	-2.2298	-2.01146	-2.79182	-1.49366	-3.10883	0.47168	-2.19441		8.36323	-0.906189	-0.686367	-1.38686	-0.924938	-1.16404	-0.914948	-1.19766	-1.17313	-1.12347	-0.550095
		8.37347	-2.40372	-1.98983	-2.26502	-2.24266	-1.94338	-2.8344	-1.47583	-3.20538	0.466995	-2.09955		8.37347	-0.798363	-0.689964	-1.37874	-0.79464	-1.09683	-0.820072	-1.10288	-1.05473	-1.02998	-0.640018
		8.38371	-2.3847	-1.97266	-2.24387	-2.18016	-1.78475	-2.82359	-1.49526	-3.13541	0.470882	-2.09721		8.38371	-0.707561	-0.691406	-1.34844	-0.731285	-1.16133	-0.775295	-1.07451	-1.02502	-0.957375	-0.579865
		8.39395	-2.37554	-1.90215	-2.1938	-2.20718	-1.78413	-2.62762	-1.43954	-3.06187	0.512447	-2.1497		8.39395	-0.60931	-0.623886	-1.23758	-0.736099	-1.19762	-0.806396	-1.08164	-1.12554	-0.894394	-0.488728
		8.40419	-2.33111	-1.92606	-2.13889	-2.19864	-1.77333	-2.48505	-1.37572	-3.1162	0.514759	-2.08092		8.40419	-0.524681	-0.594574	-1.12902	-0.603588	-1.22735	-0.756184	-1.06395	-1.07624	-0.905235	-0.441727
		8.41443	-2.44107	-1.89515	-2.13327	-2.0574	-1.74939	-2.47879	-1.33709	-3.13351	0.482372	-2.06133		8.41443	-0.533897	-0.553207	-1.09724	-0.568729	-1.31516	-0.790771	-1.06789	-1.07444	-0.981243	-0.481659
		8.42467	-2.45771	-1.83738	-2.10135	-1.93596	-1.75178	-2.57376	-1.29565	-3.24196	0.472153	-2.08846		8.42467	-0.584785	-0.617966	-1.03358	-0.473625	-1.13652	-0.956448	-1.04543	-1.06582	-0.992424	-0.442951
		8.43491	-2.38531	-1.81814	-2.15988	-1.8932	-1.78391	-2.65978	-1.30906	-3.08951	0.431934	-1.96804		8.43491	-0.578957	-0.665157	-1.01122	-0.573807	-0.955112	-0.887077	-1.05094	-1.11932	-0.972191	-0.403721
		8.44515	-2.42887	-1.90701	-2.13076	-1.89262	-1.83861	-2.58942	-1.3527	-2.99041	0.494556	-1.90162		8.44515	-0.564392	-0.526157	-0.894482	-0.463589	-0.963539	-0.890476	-1.01891	-1.1375	-0.99202	-0.488266
		8.45539	-2.45475	-1.99315	-2.02731	-1.80392	-1.76627	-2.57298	-1.36821	-3.01064	0.44643	-1.88298		8.45539	-0.482384	-0.521545	-0.891811	-0.33614	-1.0258	-0.84129	-1.08907	-1.11369	-1.08586	-0.602715
		8.46563	-2.44576	-1.92469	-1.96925	-1.76973	-1.72289	-2.53702	-1.30325	-3.02789	0.498665	-1.93668		8.46563	-0.363678	-0.475868	-0.834209	-0.248756	-0.956493	-0.692478	-1.00261	-1.15298	-0.98098	-0.565403
		8.47587	-2.41247	-1.93285	-2.04008	-1.90443	-1.86258	-2.46669	-1.27685	-2.98918	0.559677	-1.96343		8.47587	-0.351685	-0.501316	-0.845345	-0.21394	-0.927608	-0.669136	-0.993649	-1.00152	-0.950424	-0.548702
		8.48611	-2.34894	-1.78608	-2.08887	-1.91644	-1.81813	-2.4747	-1.25514	-3.00418	0.576366	-2.07967		8.48611	-0.338921	-0.517899	-0.77943	-0.13884	-0.822861	-0.568619	-0.789589	-0.998169	-0.973839	-0.676411
		8.49635	-2.3	-1.73874	-2.01305	-1.82542	-1.78655	-2.4671	-1.21557	-2.97378	0.611404	-2.01666		8.49635	-0.385132	-0.498589	-0.756805	-0.0242882	-0.819691	-0.599628	-0.409897	-1.03284	-0.887245	-0.790634
		8.50659	-2.35342	-1.76124	-2.00998	-1.68488	-1.75367	-2.39998	-1.21016	-2.86238	0.618065	-1.92545		8.50659	-0.433414	-0.421791	-0.714787	0.0533295	-0.851875	-0.534542	-0.486237	-1.0089	-0.901524	-0.664097
		8.51683	-2.32054	-1.74109	-2.02405	-1.67689	-1.68747	-2.38327	-1.25903	-2.75734	0.666359	-1.93878		8.51683	-0.437027	-0.353439	-0.608879	0.0356598	-0.760429	-0.462929	-0.681168	-1.00098	-0.972923	-0.578266
		8.52707	-2.31889	-1.7935	-1.98688	-1.71375	-1.63321	-2.44707	-1.29666	-2.63821	0.578201	-1.91265		8.52707	-0.341217	-0.353416	-0.565212	0.00542068	-0.685032	-0.415558	-0.727501	-1.00966	-1.05576	-0.445396
		8.53731	-2.34909	-1.80512	-1.81252	-1.80026	-1.60857	-2.35554	-1.33073	-2.65164	0.487198	-1.99674		8.53731	-0.287704	-0.383907	-0.499313	0.0419312	-0.720245	-0.374039	-0.684219	-0.967472	-0.900871	-0.514
		8.54755	-2.26551	-1.82534	-1.69281	-1.6988	-1.65097	-2.26158	-1.26776	-2.7043	0.540413	-1.91909		8.54755	-0.257317	-0.363365	-0.400681	0.198025	-0.668102	-0.45002	-0.65387	-0.838509	-0.745647	-0.499981
		8.55779	-2.26466	-1.76781	-1.74516	-1.6468	-1.61225	-2.24485	-1.12995	-2.77218	0.480583	-1.9373		8.55779	-0.218861	-0.293835	-0.344925	0.303524	-0.685341	-0.359432	-0.610977	-0.90107	-0.656311	-0.409927
		8.56804	-2.18736	-1.76727	-1.73849	-1.7543	-1.6539	-2.19623	-1.02744	-2.76729	0.525368	-1.97689		8.56804	-0.302963	-0.235382	-0.394016	0.291649	-0.713043	-0.374371	-0.665489	-1.03081	-0.625294	-0.332657
		8.57827	-2.15522	-1.81281	-1.59805	-1.7114	-1.55857	-2.20699	-0.986572	-2.7103	0.661354	-1.93764		8.57827	-0.182953	-0.198776	-0.452415	0.308197	-0.646286	-0.372299	-0.717575	-1.00344	-0.523552	-0.233025
		8.58851	-2.18982	-1.74466	-1.5948	-1.7235	-1.5185	-2.171	-0.97488	-2.7117	0.649395	-1.8663		8.58851	-0.157005	-0.223763	-0.491589	0.264248	-0.592178	-0.433071	-0.703484	-0.776688	-0.603264	-0.145607
		8.59875	-2.1736	-1.77687	-1.60303	-1.7003	-1.53299	-2.07965	-1.10168	-2.63673	0.599388	-1.79063		8.59875	-0.115257	-0.199692	-0.484695	0.312775	-0.622932	-0.384369	-0.714367	-0.710995	-0.563995	-0.164421
		8.60899	-2.09247	-1.70177	-1.6498	-1.75293	-1.57213	-2.12731	-1.09633	-2.60059	0.632347	-1.76502		8.60899	-0.0233002	-0.193817	-0.541191	0.36618	-0.648777	-0.409252	-0.707092	-0.678055	-0.419109	-0.106533
		8.61924	-1.96726	-1.73635	-1.60696	-1.74601	-1.52382	-2.19318	-1.11485	-2.50767	0.617374	-1.76397		8.61924	0.0762787	-0.195557	-0.571781	0.408833	-0.537056	-0.322159	-0.792377	-0.712505	-0.383869	-0.00823212
		8.62947	-1.97952	-1.71253	-1.54654	-1.77931	-1.4441	-2.23928	-1.12175	-2.4614	0.56546	-1.7168		8.62947	0.132935	-0.19006	-0.550358	0.497681	-0.477821	-0.251873	-0.847118	-0.712189	-0.36145	-0.0254555
		8.63972	-1.96434	-1.64362	-1.58268	-1.78393	-1.39648	-2.13127	-1.09564	-2.46359	0.506882	-1.75647		8.63972	0.194637	-0.140327	-0.4417	0.469677	-0.592144	-0.214298	-0.686184	-0.771324	-0.328629	-0.0863609
		8.64995	-1.94679	-1.61769	-1.67982	-1.70675	-1.41689	-2.11258	-1.08232	-2.45319	0.535263	-1.75956		8.64995	0.132736	-0.134521	-0.356094	0.581066	-0.644867	-0.357231	-0.657398	-0.749237	-0.321358	-0.131302
		8.6602	-1.83894	-1.55085	-1.66157	-1.63316	-1.4889	-2.18173	-1.00623	-2.49451	0.503696	-1.72726		8.6602	0.065918	-0.0953369	-0.364834	0.600616	-0.642925	-0.38031	-0.639862	-0.766258	-0.308594	-0.108654
		8.67043	-1.82112	-1.5204	-1.65564	-1.58989	-1.46284	-2.26315	-0.897976	-2.50639	0.588661	-1.64426		8.67043	0.102409	-0.0172043	-0.406021	0.647278	-0.518673	-0.203831	-0.64753	-0.662334	-0.344864	-0.138885
		8.68067	-1.89318	-1.54194	-1.59439	-1.64829	-1.37588	-2.21632	-0.799316	-2.44793	0.65382	-1.56966		8.68067	0.147541	0.00432205	-0.394207	0.689285	-0.411781	-0.0835724	-0.4963	-0.556057	-0.33812	-0.149734
		8.69092	-2.00266	-1.5813	-1.50989	-1.7222	-1.36951	-2.24005	-0.902935	-2.4276	0.679508	-1.56853		8.69092	0.111324	0.105961	-0.365456	0.716263	-0.326042	-0.0571899	-0.488892	-0.499741	-0.268921	-0.0514565
		8.70115	-1.98267	-1.55958	-1.47819	-1.64585	-1.41842	-2.31274	-1.02536	-2.5079	0.708012	-1.62846		8.70115	0.0876732	0.158897	-0.231853	0.721176	-0.331753	-0.0178146	-0.479046	-0.41806	-0.226585	-0.0745926
		8.7114	-2.029	-1.58004	-1.43475	-1.62746	-1.45685	-2.27293	-0.904221	-2.48724	0.769535	-1.59262		8.7114	0.139469	0.239628	-0.214283	0.761383	-0.321918	0.0503616	-0.422997	-0.372009	-0.313942	-0.108376
		8.72163	-1.93847	-1.5092	-1.37285	-1.61523	-1.36896	-2.17797	-0.933044	-2.41087	0.746803	-1.60767		8.72163	0.190468	0.325043	-0.292213	0.737343	-0.22226	0.0765724	-0.316422	-0.379482	-0.347797	-0.0386047
		8.73188	-1.89828	-1.53887	-1.32991	-1.61203	-1.39216	-2.14133	-0.991165	-2.37752	0.738609	-1.68379		8.73188	0.181015	0.255005	-0.17963	0.820885	-0.176208	0.0604935	-0.332077	-0.244743	-0.313694	0.109642
		8.74212	-1.92029	-1.52616	-1.47057	-1.5233	-1.39422	-2.23446	-0.928493	-2.35523	0.727776	-1.70819		8.74212	0.289028	0.134834	-0.184837	0.979488	-0.0954323	0.0361862	-0.341137	-0.150555	-0.254074	0.151176
		8.75236	-1.88919	-1.49897	-1.51596	-1.48172	-1.38519	-2.23661	-0.876114	-2.42088	0.61734	-1.19484		8.75236	0.433723	0.080162	-0.224442	1.0378	-0.179012	-0.000827789	-0.360806	-0.197559	-0.234135	0.06147
		8.7626	-1.74484	-1.37944	-1.51659	-1.45403	-1.41722	-2.17317	-0.877796	-2.38971	0.523151	-1.00967		8.7626	0.353535	0.101131	-0.232666	0.987236	-0.30188	0.0202332	-0.414043	-0.215942	-0.221401	0.0611382
		8.77284	-1.77674	-1.40905	-1.41092	-1.35035	-1.35603	-2.14268	-0.832935	-2.35735	0.544418	-1.06898		8.77284	0.249165	0.167091	-0.169628	0.937996	-0.295105	0.0513611	-0.377041	-0.18819	-0.197044	0.0802689
		8.78308	-1.78341	-1.47345	-1.27321	-1.26849	-1.23435	-1.99555	-0.809845	-2.2979	0.54813	-1.2403		8.78308	0.286446	0.176422	-0.182358	0.914089	-0.165668	0.0933838	-0.474102	-0.221519	-0.188866	0.117607
		8.79331	-1.80652	-1.45859	-1.28935	-1.30645	-1.3183	-1.97352	-0.799843	-2.1804	0.586014	-1.34815		8.79331	0.234619	0.163731	-0.142986	0.912842	-0.0876846	0.160378	-0.435867	-0.321644	-0.0952301	0.240009
		8.80356	-1.80675	-1.4542	-1.29066	-1.27606	-1.4451	-2.00232	-0.875481	-2.15866	0.626698	-1.41882		8.80356	0.14146	0.276299	-0.114098	0.92836	-0.0498466	0.162285	-0.396839	-0.237267	-0.0952072	0.231186
		8.8138	-1.69906	-1.43582	-1.22363	-1.38588	-1.39955	-1.98668	-0.881763	-2.1619	0.573257	-1.51855		8.8138	0.191551	0.26923	-0.163322	0.960976	-0.0168152	0.164253	-0.325886	-0.299889	-0.129494	0.285309
		8.82404	-1.62344	-1.41286	-1.2077	-1.44104	-1.38451	-2.00211	-0.973412	-2.17377	0.507488	-1.54821		8.82404	0.253258	0.310913	-0.106255	1.03878	-0.0154648	0.14542	-0.277287	-0.303036	-0.021225	0.257248
		8.83428	-1.70599	-1.34979	-1.31084	-1.42456	-1.28149	-1.96964	-0.92971	-2.23178	0.461594	-1.47194		8.83428	0.22963	0.257629	0.0317039	1.09362	-0.0558777	0.197491	-0.376564	-0.254028	0.0627136	0.147255
		8.84452	-1.67508	-1.3233	-1.40545	-1.40066	-1.28091	-1.87704	-0.898834	-2.1752	0.531235	-1.36134		8.84452	0.251263	0.212677	0.0445671	1.14726	-0.0743332	0.155609	-0.315029	-0.19521	0.0573578	0.175301
		8.85476	-1.59789	-1.3069	-1.43389	-1.33206	-1.34602	-1.79804	-0.893852	-2.10027	0.520256	-1.34905		8.85476	0.292931	0.217644	0.0208054	1.26591	0.00222397	0.192314	-0.284233	-0.046936	0.0552368	0.13829
		8.865	-1.57082	-1.26489	-1.48534	-1.28256	-1.31374	-1.90464	-0.835297	-2.04609	0.427975	-1.41686		8.865	0.442749	0.232727	-0.00539398	1.19795	0.108307	0.271973	-0.19384	0.0303574	0.0814743	0.140579
		8.87524	-1.53775	-1.22982	-1.59675	-1.27131	-1.26	-1.85143	-0.782463	-2.14276	0.43314	-1.32581		8.87524	0.529686	0.277607	0.024086	1.15839	0.0945168	0.344402	-0.21468	0.106224	0.0609245	0.266308
		8.88548	-1.50024	-1.24534	-1.55507	-1.25087	-1.16488	-1.79083	-0.821968	-2.17148	0.457268	-1.28762		8.88548	0.481659	0.348671	0.15591	1.1058	0.0218964	0.375717	-0.203625	0.101059	0.154442	0.45647
		8.89572	-1.45906	-1.34968	-1.47766	-1.26006	-1.1649	-1.78201	-0.810905	-2.11617	0.432377	-1.19612		8.89572	0.380928	0.319153	0.184353	1.05835	0.0182076	0.317398	-0.193851	0.0747604	0.181168	0.557178
		8.90596	-1.43845	-1.36166	-1.35471	-1.24777	-1.13472	-1.83067	-0.752419	-2.12299	0.456421	-1.16281		8.90596	0.384911	0.37698	0.162323	1.036	0.167912	0.305645	-0.111095	0.0608597	0.254925	0.53796
		8.9162	-1.5398	-1.33108	-1.32657	-1.22454	-1.13577	-1.79885	-0.71146	-2.06153	0.45673	-1.15128		8.9162	0.360504	0.415413	0.0896873	1.14535	0.225845	0.416199	-0.043457	0.11874	0.221149	0.524254
		8.92644	-1.60508	-1.28922	-1.34503	-1.22504	-1.07647	-1.81262	-0.708958	-2.06092	0.505642	-1.20802		8.92644	0.207535	0.298008	0.00672913	1.18193	0.268429	0.45113	0.056736	0.150032	0.165482	0.544769
		8.93668	-1.61446	-1.32395	-1.28727	-1.12678	-0.987358	-1.66935	-0.726257	-2.02747	0.50198	-1.21735		8.93668	0.229542	0.27755	0.045639	1.1292	0.24646	0.426907	0.0143127	0.244087	0.154648	0.533791
		8.94692	-1.52989	-1.31248	-1.23006	-1.0574	-1.06321	-1.59206	-0.739609	-1.91923	0.561123	-1.20711		8.94692	0.265617	0.299114	0.00325775	1.11348	0.256794	0.417263	0.0372353	0.258892	0.155777	0.545685
		8.95716	-1.55199	-1.24902	-1.16658	-1.07545	-0.985203	-1.57779	-0.720772	-1.84586	0.568714	-1.17847		8.95716	0.361557	0.343079	-0.00563431	1.2289	0.264603	0.419456	0.0169106	0.25819	0.299103	0.421436
		8.9674	-1.56292	-1.21406	-1.11646	-1.06159	-1.01933	-1.57642	-0.724693	-1.85453	0.522999	-1.15899		8.9674	0.373451	0.341923	0.0309067	1.30684	0.182423	0.412567	-0.0257797	0.315018	0.312767	0.529369
		8.97764	-1.61239	-1.10905	-1.19671	-1.05067	-0.964699	-1.55729	-0.680561	-1.81345	0.449543	-1.10096		8.97764	0.345451	0.322216	0.113243	1.38232	0.230202	0.301414	-0.0144081	0.346214	0.440804	0.574345
		8.98788	-1.48358	-1.03889	-1.18596	-1.06522	-0.963482	-1.65499	-0.63047	-1.73455	0.371532	-1.11596		8.98788	0.239834	0.302116	0.0915947	1.32273	0.176926	0.420086	0.0120316	0.280922	0.435799	0.581688
		8.99812	-1.381	-1.06097	-1.12171	-1.08459	-1.00562	-1.60523	-0.596279	-1.72638	0.377396	-1.11405		8.99812	0.26656	0.255196	0.13488	1.26003	0.268311	0.375015	0.0892487	0.226505	0.47253	0.542347
		9.00836	-1.39466	-1.12631	-1.08995	-1.05829	-0.954788	-1.56211	-0.590214	-1.76222	0.541	-1.01675		9.00836	0.233467	0.23262	0.134842	1.29348	0.309795	0.394638	0.0445557	0.385601	0.515396	0.556595
		9.0186	-1.37857	-1.2056	-1.16869	-1.05915	-0.925171	-1.56965	-0.544899	-1.77143	0.519161	-1.02151		9.0186	0.24926	0.287731	0.175327	1.27951	0.43985	0.355896	-0.0481033	0.372559	0.529442	0.543339
		9.02884	-1.38523	-1.27704	-1.19144	-1.07463	-0.792881	-1.58243	-0.496956	-1.72175	0.426392	-0.893913		9.02884	0.344391	0.409977	0.108189	1.29672	0.509747	0.35046	-0.0880051	0.420197	0.643436	0.466881
		9.03908	-1.48069	-1.31161	-1.18803	-0.993595	-0.851196	-1.53607	-0.607986	-1.65511	0.404911	-0.891693		9.03908	0.306732	0.423012	0.121422	1.36703	0.442726	0.474602	0.0192947	0.454697	0.587757	0.515598
		9.04932	-1.42773	-1.27465	-1.14532	-1.02509	-0.811859	-1.45999	-0.614655	-1.69033	0.448528	-0.978645		9.04932	0.28611	0.470871	0.098381	1.42983	0.412971	0.468788	0.125584	0.402443	0.580627	0.467499
		9.05956	-1.24878	-1.19241	-1.08395	-0.97197	-0.82745	-1.48421	-0.584862	-1.71782	0.440254	-0.887436		9.05956	0.242847	0.394791	0.0857544	1.42802	0.389561	0.466808	0.05793	0.399582	0.575058	0.57095
		9.0698	-1.18053	-1.08894	-1.09366	-0.912472	-0.769875	-1.47327	-0.521168	-1.77485	0.348976	-0.816959		9.0698	0.211151	0.377506	0.0619736	1.41629	0.406544	0.453049	0.0903435	0.348267	0.518291	0.482162
		9.08004	-1.22408	-1.1535	-1.17501	-0.9086	-0.688953	-1.47163	-0.521645	-1.70123	0.264515	-0.820717		9.08004	0.136692	0.456207	0.112907	1.44292	0.428669	0.477203	0.196426	0.389091	0.424377	0.539082
		9.09028	-1.2376	-1.16245	-1.11864	-1.02345	-0.65181	-1.44503	-0.447617	-1.56372	0.220837	-0.908146		9.09028	0.107437	0.457748	0.14159	1.50141	0.319775	0.39502	0.238571	0.482208	0.449268	0.669403
		9.10052	-1.38933	-1.05236	-1.03874	-1.0053	-0.845928	-1.39392	-0.468361	-1.55956	0.240665	-0.878998		9.10052	0.0484543	0.382622	0.116665	1.5705	0.15258	0.41346	0.280815	0.555428	0.539692	0.633736
		9.11076	-1.30383	-0.912201	-1.09948	-0.87262	-0.937122	-1.47823	-0.487694	-1.59382	0.224701	-0.840302		9.11076	0.0106049	0.293152	0.191292	1.6012	0.154419	0.421707	0.28619	0.509304	0.401623	0.610954
		9.121	-1.25021	-0.889572	-1.15755	-0.8573	-0.928795	-1.49638	-0.555286	-1.69309	0.28793	-0.812088		9.121	0.0840988	0.307163	0.216827	1.5637	0.216373	0.454777	0.241264	0.479214	0.373024	0.633175
		9.13124	-1.23264	-0.835526	-1.15742	-0.887009	-0.877041	-1.4598	-0.656456	-1.72717	0.297218	-0.870365		9.13124	0.0517197	0.317398	0.203354	1.5549	0.225956	0.465115	0.258739	0.418526	0.492661	0.721519
		9.14148	-1.198	-0.967728	-0.980675	-0.905365	-0.748821	-1.34498	-0.533543	-1.6064	0.317696	-1.00161		9.14148	0.0586357	0.274166	0.186451	1.50059	0.221985	0.452919	0.231117	0.486916	0.504677	0.661621
		9.15172	-1.22465	-1.01279	-0.890369	-0.796898	-0.701031	-1.37931	-0.568996	-1.64451	0.289589	-1.00051		9.15172	-0.0120811	0.242798	0.228722	1.49717	0.32312	0.51659	0.107224	0.487358	0.494488	0.574989
		9.16196	-1.15199	-0.897919	-0.870403	-0.778206	-0.741875	-1.4253	-0.490627	-1.575	0.257187	-0.962887		9.16196	-0.0339203	0.252041	0.26104	1.46287	0.397808	0.480896	0.0510292	0.60014	0.404305	0.484879
		9.1722	-1.27741	-0.804466	-0.846275	-0.743217	-0.641308	-1.47213	-0.439903	-1.45809	0.246967	-0.980911		9.1722	0.0778351	0.276154	0.225983	1.40616	0.368614	0.362976	0.0588837	0.645168	0.321442	0.475845
		9.18244	-1.2789	-0.773544	-0.829159	-0.721809	-0.553364	-1.37149	-0.376854	-1.32851	0.205666	-1.01565		9.18244	0.0666199	0.259323	0.151093	1.41156	0.298843	0.372643	0.00277328	0.667816	0.322289	0.479141
		9.19268	-1.24073	-0.755463	-0.806564	-0.625477	-0.583786	-1.40204	-0.317417	-1.37495	0.188793	-1.06253		9.19268	0.102058	0.17334	0.116119	1.42928	0.275978	0.358589	0.0177307	0.626785	0.428001	0.591393
		9.20292	-1.19492	-0.75613	-0.958652	-0.586044	-0.599712	-1.40361	-0.399696	-1.40759	0.164906	-1.06543		9.20292	0.0888748	0.161942	0.136047	1.43873	0.289219	0.436195	0.0803146	0.525459	0.485222	0.668415
		9.21316	-1.11372	-0.786442	-0.941868	-0.596245	-0.628052	-1.42213	-0.449429	-1.41901	0.127686	-1.00714		9.21316	0.082962	0.308712	0.216446	1.43717	0.287811	0.417084	0.0238571	0.475342	0.509659	0.635925
		9.2234	-1.15787	-0.851067	-0.826702	-0.601013	-0.556152	-1.34319	-0.429913	-1.36925	0.129665	-0.953262		9.2234	-0.0486221	0.335709	0.24926	1.43574	0.289505	0.427834	0.0199623	0.375301	0.49054	0.594528
		9.23364	-1.14779	-0.833626	-0.801701	-0.629314	-0.511547	-1.25129	-0.432774	-1.35264	0.21011	-0.926456		9.23364	-0.00846863	0.367779	0.330383	1.49815	0.305016	0.49749	-0.0226669	0.506466	0.444466	0.556057
		9.24388	-1.18031	-0.815117	-0.78339	-0.606152	-0.567421	-1.25874	-0.380989	-1.32981	0.160614	-1.00864		9.24388	0.131783	0.37957	0.378235	1.46732	0.225956	0.510582	0.107246	0.627369	0.43605	0.683052
		9.25412	-1.20422	-0.818214	-0.831734	-0.676094	-0.642048	-1.28364	-0.398979	-1.31038	0.26973	-0.966663		9.25412	0.0756111	0.360313	0.33625	1.39426	0.337536	0.493614	0.197357	0.593559	0.413937	0.668568
		9.26436	-1.27568	-0.826546	-0.929245	-0.645966	-0.617142	-1.3221	-0.367081	-1.39407	0.190414	-0.843536		9.26436	0.101677	0.455078	0.225311	1.36961	0.362984	0.44046	0.22282	0.580994	0.402397	0.737602
		9.2746	-1.19833	-0.884289	-0.802273	-0.666397	-0.512348	-1.24361	-0.393112	-1.45718	0.167549	-0.745506		9.2746	0.0817871	0.479874	0.188572	1.33707	0.447186	0.422211	0.252121	0.561993	0.421684	0.717003
		9.28484	-1.10787	-0.861519	-0.769482	-0.752052	-0.45628	-1.20948	-0.329624	-1.3975	0.0957413	-0.768108		9.28484	0.0481453	0.444023	0.188034	1.3178	0.456699	0.35104	0.288925	0.520126	0.429615	0.650829
		9.29508	-1.11311	-0.745625	-0.916309	-0.674782	-0.504097	-1.21494	-0.227055	-1.3319	-0.076683	-0.7691		9.29508	-0.00564194	0.375454	0.177319	1.35101	0.398357	0.408634	0.270683	0.445381	0.449745	0.583691
		9.30532	-1.08389	-0.719734	-0.906319	-0.616081	-0.587006	-1.21276	-0.26297	-1.30002	-0.0522232	-0.767059		9.30532	-0.0712204	0.41143	0.234718	1.37767	0.35302	0.392159	0.304016	-0.0162773	0.452885	0.584213
		9.31556	-0.971851	-0.78754	-0.825653	-0.636681	-0.515804	-1.29026	-0.311718	-1.26009	0.0411911	-0.742931		9.31556	-0.110428	0.451836	0.239891	1.40417	0.427635	0.339111	0.307068	-0.0272598	0.474709	0.502522
		9.3258	-0.978264	-0.791782	-0.806244	-0.608894	-0.460873	-1.19513	-0.345581	-1.2945	0.0159073	-0.768551		9.3258	-0.0725822	0.498146	0.324409	1.43467	0.582085	0.437302	0.252026	0.136311	0.490723	0.488815
		9.33604	-1.05792	-0.777374	-0.888031	-0.550495	-0.440918	-1.20722	-0.294537	-1.27796	-0.0445786	-0.88591		9.33604	-0.0813179	0.403839	0.301594	1.32212	0.550407	0.441605	0.179108	0.226315	0.483219	0.520809
		9.34628	-1.01305	-0.902718	-0.915035	-0.576611	-0.516258	-1.1767	-0.272949	-1.194	-0.132771	-0.856956		9.34628	-0.229923	0.438889	0.288422	1.38746	0.536865	0.549751	0.14716	0.185116	0.518997	0.554413
		9.35652	-0.985188	-0.908432	-0.790257	-0.606499	-0.595173	-1.21538	-0.173649	-1.19394	-0.134384	-0.824471		9.35652	-0.314205	0.432629	0.276009	1.4046	0.55352	0.524052	0.203793	0.304741	0.538651	0.592834
		9.36676	-1.01716	-0.884956	-0.688667	-0.566086	-0.549335	-1.25101	-0.216137	-1.16955	-0.103851	-0.710903		9.36676	-0.283009	0.416359	0.26857	1.35312	0.601143	0.434692	0.281868	0.508183	0.33358	0.671299
		9.377	-0.986252	-0.784241	-0.650593	-0.563629	-0.623711	-1.30855	-0.284046	-1.15272	-0.137863	-0.806698		9.377	-0.171989	0.385887	0.413639	1.27817	0.512974	0.396484	0.224537	0.562912	0.397507	0.723736
		9.38724	-1.00239	-0.81181	-0.700867	-0.593102	-0.526089	-1.26177	-0.283333	-1.19131	-0.201973	-0.853191		9.38724	-0.167831	0.369343	0.371536	1.19039	0.540871	0.369087	0.242489	0.632088	0.455326	0.675838
		9.39748	-1.05072	-0.797878	-0.723442	-0.581703	-0.473629	-1.18705	-0.289436	-1.04121	-0.257217	-0.737057		9.39748	-0.0952415	0.327534	0.259933	1.31344	0.508469	0.372608	0.289505	0.629669	0.495094	0.695053
		9.40772	-1.04694	-0.722164	-0.736343	-0.555058	-0.534164	-1.20166	-0.171703	-0.954243	-0.257763	-0.645195		9.40772	-0.0797577	0.252827	0.234825	1.32127	0.551765	0.363335	0.302849	0.620586	0.622051	0.602371
		9.41796	-1.12204	-0.670658	-0.72784	-0.506363	-0.595863	-1.21495	-0.0623169	-0.93523	-0.207108	-0.688499		9.41796	-0.00976562	0.289089	0.275883	1.32805	0.523289	0.468262	0.372902	0.633774	0.540886	0.603073
		9.4282	-1.14405	-0.646267	-0.770554	-0.505062	-0.571411	-1.19183	-0.00671768	-0.955078	-0.10936	-0.800381		9.4282	-0.0279007	0.266212	0.26738	1.31823	0.488052	0.587448	0.372307	0.53199	0.485619	0.586433
		9.43844	-1.11501	-0.640495	-0.884434	-0.525063	-0.462708	-1.19717	0.0071907	-0.957867	-0.149055	-0.711819		9.43844	-0.123947	0.402565	0.360592	1.31189	0.496204	0.611942	0.404781	0.474937	0.454338	0.562103
		9.44868	-1.10474	-0.633427	-0.892635	-0.603363	-0.412819	-1.21121	-0.146744	-1.03538	-0.200386	-0.634476		9.44868	-0.268108	0.493401	0.344139	1.31606	0.459774	0.583546	0.293224	0.531857	0.471077	0.550884
		9.45892	-0.995846	-0.683304	-0.882835	-0.592049	-0.362034	-1.06691	-0.210922	-1.02129	-0.331745	-0.541412		9.45892	-0.29134	0.464958	0.399002	1.2554	0.495571	0.522335	0.312004	0.518768	0.553665	0.600784
		9.46916	-0.990593	-0.50568	-1.009	-0.461613	-0.407181	-0.96172	-0.243553	-0.927349	-0.254292	-0.529118		9.46916	-0.249176	0.463638	0.487862	1.33929	0.49469	0.520023	0.306114	0.562721	0.644787	0.528996
		9.4794	-0.927635	-0.441536	-1.01227	-0.445503	-0.530491	-0.99419	-0.235291	-0.833046	-0.223488	-0.574249		9.4794	-0.178162	0.436123	0.472172	1.25051	0.610203	0.539833	0.322193	0.522526	0.609249	0.538963
		9.48964	-0.837742	-0.502987	-0.962292	-0.325783	-0.428814	-1.01623	-0.207481	-0.824043	-0.211369	-0.57785		9.48964	-0.118404	0.382072	0.336712	1.22836	0.616043	0.447029	0.217972	0.49239	0.503452	0.524372
		9.49988	-0.862751	-0.567265	-0.880093	-0.332676	-0.360126	-0.991234	-0.111828	-0.955616	-0.234329	-0.610146		9.49988	-0.0982361	0.326817	0.248322	1.19823	0.621567	0.359043	0.216278	0.543198	0.360806	0.49736
		9.51012	-0.941383	-0.577896	-0.680458	-0.402458	-0.384399	-1.01374	-0.0834084	-0.915966	-0.259338	-0.581642		9.51012	-0.0633621	0.31739	0.288216	1.04733	0.633366	0.289169	0.19532	0.554649	0.49519	0.467533
		9.52036	-0.936527	-0.591415	-0.638279	-0.458012	-0.461384	-0.976788	-0.0915947	-0.924892	-0.296577	-0.540337		9.52036	-0.121323	0.333649	0.330776	1.00713	0.631744	0.298874	0.206047	0.591404	0.565308	0.53788
		9.5306	-0.938187	-0.601994	-0.707859	-0.498695	-0.473518	-1.01694	-0.0860062	-0.910278	-0.329075	-0.526711		9.5306	-0.165478	0.344891	0.313419	1.02581	0.630577	0.395805	0.262863	0.634727	0.545494	0.627048
		9.54084	-0.920101	-0.584991	-0.763126	-0.509926	-0.453171	-1.11024	-0.168388	-0.914497	-0.317894	-0.505482		9.54084	-0.217804	0.343567	0.312298	1.10341	0.583523	0.423534	0.257034	0.576607	0.500328	0.606998
		9.55108	-0.89167	-0.515526	-0.797077	-0.441658	-0.526638	-1.02995	-0.149139	-0.878914	-0.306164	-0.472065		9.55108	-0.272789	0.328667	0.37772	1.10011	0.606163	0.618011	0.124542	0.502651	0.530357	0.518745
		9.56132	-0.840603	-0.535675	-0.935169	-0.449272	-0.48629	-0.94685	-0.132771	-0.847382	-0.389206	-0.491772		9.56132	-0.275436	0.384384	0.316055	0.943916	0.54768	0.689301	0.0396347	0.413475	0.527534	0.369724
		9.57156	-0.796432	-0.590843	-0.977333	-0.538765	-0.443684	-0.933537	-0.1577	-0.746807	-0.464687	-0.503525		9.57156	-0.24577	0.367661	0.276382	0.817722	0.623947	0.703091	0.206501	0.423569	0.553566	0.415356
		9.5818	-0.774521	-0.701756	-0.967976	-0.478264	-0.448677	-0.992626	-0.15976	-0.744473	-0.465523	-0.519913		9.5818	-0.276463	0.34663	0.181419	0.813156	0.598518	0.630348	0.344116	0.315937	0.588615	0.496254
		9.59204	-0.762196	-0.6646	-0.906796	-0.482285	-0.442371	-0.97271	-0.0873756	-0.762054	-0.391876	-0.514946		9.59204	-0.268585	0.370068	0.244865	0.797424	0.572983	0.536434	0.345413	0.283012	0.605568	0.480385
		9.60228	-0.690647	-0.523956	-0.866837	-0.455208	-0.392971	-0.833138	-0.115547	-0.772797	-0.331291	-0.414665		9.60228	-0.263252	0.317543	0.306526	0.858086	0.534554	0.468224	0.245327	0.319942	0.502712	0.440163
		9.61252	-0.695454	-0.518936	-0.802597	-0.361069	-0.327381	-0.783646	-0.139996	-0.772495	-0.32235	-0.340614		9.61252	-0.259083	0.371559	0.348217	0.942535	0.57003	0.454132	0.213036	0.425926	0.493092	0.404247
		9.62276	-0.736542	-0.487717	-0.783382	-0.300568	-0.314388	-0.769802	-0.105827	-0.699268	-0.349602	-0.37249		9.62276	-0.250092	0.38361	0.357422	0.953945	0.535355	0.473721	0.311455	0.523838	0.500458	0.348145
		9.633	-0.70433	-0.529858	-0.755463	-0.283348	-0.307579	-0.810833	-0.0970459	-0.696098	-0.299068	-0.425621		9.633	-0.160175	0.267227	0.374859	0.959389	0.491947	0.540249	0.48439	0.486298	0.506897	0.364178
		9.64324	-0.645432	-0.447723	-0.687347	-0.36623	-0.247917	-0.835167	-0.0507774	-0.704857	-0.275429	-0.536427		9.64324	-0.144833	0.337082	0.307808	0.878651	0.478607	0.544231	0.551685	0.513489	0.549404	0.436264
		9.65348	-0.594864	-0.524158	-0.655575	-0.409897	-0.325809	-0.848099	-0.0543671	-0.701889	-0.299534	-0.542076		9.65348	-0.294716	0.376827	0.358925	0.807327	0.547108	0.478252	0.472767	0.554199	0.603134	0.524227
		9.66372	-0.541874	-0.549065	-0.63607	-0.416634	-0.322575	-0.712723	-0.0584717	-0.722702	-0.376362	-0.499577		9.66372	-0.327309	0.326626	0.438587	0.806412	0.495464	0.498814	0.48283	0.623314	0.636726	0.579842
		9.67396	-0.516708	-0.569305	-0.672382	-0.24411	-0.267452	-0.671875	-0.0613632	-0.646397	-0.355919	-0.466286		9.67396	-0.343639	0.368805	0.454243	0.875706	0.491302	0.504406	0.404438	0.704971	0.724419	0.47361
		9.6842	-0.425812	-0.520645	-0.648174	-0.235756	-0.181732	-0.731464	-0.0541077	-0.641594	-0.345081	-0.438541		9.6842	-0.359192	0.359219	0.415916	0.798599	0.501434	0.551708	0.37616	0.659306	0.605354	0.389854
		9.69444	-0.372765	-0.474236	-0.592392	-0.170227	-0.112602	-0.722954	-0.0819054	-0.663063	-0.374733	-0.372765		9.69444	-0.409332	0.398621	0.406082	0.739735	0.550644	0.591103	0.309341	0.695736	0.533588	0.430004
		9.70468	-0.242443	-0.439522	-0.612923	0.000648499	-0.0864105	-0.662266	-0.067173	-0.78928	-0.406761	-0.423702		9.70468	-0.292355	0.375671	0.437443	0.753365	0.579254	0.581081	0.30965	0.742561	0.565044	0.478634
		9.71492	-0.247322	-0.324284	-0.59745	-0.0434265	-0.167534	-0.605984	-0.136337	-0.755138	-0.336525	-0.480839		9.71492	-0.327698	0.443775	0.394138	0.719818	0.561268	0.494057	0.315174	0.64761	0.50629	0.514549
		9.72516	-0.313293	-0.269375	-0.537369	-0.12476	-0.145882	-0.662228	-0.0525894	-0.785847	-0.249859	-0.49078		9.72516	-0.35812	0.480003	0.44368	0.770252	0.562302	0.436481	0.32193	0.644176	0.477474	0.47707
		9.7354	-0.200115	-0.231323	-0.506817	-0.116478	-0.0674362	-0.537525	0.0326309	-0.807327	-0.244602	-0.489815		9.7354	-0.374119	0.417252	0.408752	0.762932	0.668842	0.441353	0.347073	0.642426	0.513069	0.445827
		9.74564	-0.229034	-0.274082	-0.478859	-0.0868034	-0.0102234	-0.498768	0.124161	-0.752468	-0.276981	-0.403996		9.74564	-0.392406	0.316494	0.4538	0.791748	0.741131	0.451405	0.27272	0.672848	0.404556	0.550835
		9.75588	-0.360546	-0.242302	-0.515854	-0.141655	0.00115967	-0.434273	0.124493	-0.642883	-0.358528	-0.279255		9.75588	-0.273815	0.283806	0.370152	0.680859	0.571354	0.484436	0.260059	0.702057	0.463898	0.501339
		9.76612	-0.33532	-0.228317	-0.566143	-0.129791	0.0139771	-0.544891	0.0731125	-0.508865	-0.390228	-0.241966		9.76612	-0.25359	0.247089	0.358589	0.572308	0.473198	0.36517	0.318138	0.705116	0.509541	0.428375
		9.77636	-0.158733	-0.139206	-0.502525	-0.0909653	0.0815048	-0.674053	0.122154	-0.505768	-0.337097	-0.101299		9.77636	-0.274761	0.205368	0.430687	0.592655	0.478157	0.371712	0.427944	0.714596	0.580032	0.399361
		9.7866	-0.168629	-0.121223	-0.411575	-0.0727768	-0.0520554	-0.636539	0.0860519	-0.432175	-0.257965	-0.114689		9.7866	-0.276451	0.225323	0.420395	0.600067	0.460083	0.374634	0.363525	0.714153	0.657646	0.452599
		9.79684	-0.245472	-0.163994	-0.27594	-0.118767	-0.174461	-0.675697	0.139122	-0.483318	-0.240265	-0.140629		9.79684	-0.277702	0.312679	0.402122	0.498192	0.507706	0.402275	0.315983	0.690907	0.652832	0.517315
		9.80708	-0.288742	-0.226341	-0.294384	-0.0767174	-0.202721	-0.559433	0.11517	-0.475521	-0.248848	-0.115818		9.80708	-0.36742	0.39119	0.356827	0.525253	0.475487	0.51125	0.304634	0.594467	0.682434	0.433796
		9.81732	-0.272095	-0.187988	-0.3615	-0.0922852	-0.251328	-0.51416	0.143604	-0.377544	-0.243649	-0.102966		9.81732	-0.407116	0.437889	0.394863	0.605148	0.472847	0.499352	0.311344	0.571793	0.623627	0.42561
		9.82756	-0.273331	-0.273357	-0.409073	-0.067627	-0.151142	-0.513157	0.0744858	-0.391216	-0.125347	-0.12352		9.82756	-0.449268	0.299629	0.414307	0.606972	0.430122	0.456078	0.323612	0.632401	0.601833	0.470417
		9.8378	-0.326462	-0.269836	-0.485119	-0.0582809	-0.0230255	-0.442085	0.119549	-0.459419	-0.110756	-0.21312		9.8378	-0.40868	0.178631	0.379974	0.51461	0.45311	0.416954	0.280754	0.605686	0.636776	0.50095
		9.84804	-0.364479	-0.28051	-0.413864	-0.0188789	0.0702896	-0.387543	0.181282	-0.361008	-0.225456	-0.256271		9.84804	-0.305977	0.249737	0.337681	0.44529	0.464123	0.39819	0.299557	0.541504	0.582058	0.583347
		9.85828	-0.456604	-0.293156	-0.394958	0.0996857	0.0987587	-0.377937	0.209122	-0.332397	-0.192245	-0.210533		9.85828	-0.261154	0.205105	0.363056	0.567017	0.478371	0.467365	0.236767	0.47887	0.606792	0.595936
		9.86852	-0.375027	-0.254593	-0.372322	0.140846	0.15028	-0.342094	0.196949	-0.293076	-0.179276	-0.110252		9.86852	-0.252228	0.215309	0.367752	0.568851	0.544292	0.534122	0.210007	0.45274	0.568741	0.585541
		9.87876	-0.394356	-0.264664	-0.325436	0.129395	0.185909	-0.386375	0.176552	-0.281494	-0.164909	-0.120159		9.87876	-0.295918	0.163166	0.44759	0.523148	0.525173	0.47242	0.205772	0.433487	0.551289	0.669559
		9.889	-0.440639	-0.195465	-0.371357	0.0755463	0.0730095	-0.352043	0.188271	-0.198479	-0.182911	-0.115761		9.889	-0.271328	0.192314	0.506313	0.420769	0.553173	0.460094	0.233322	0.395592	0.62365	0.638382
		9.89924	-0.572151	-0.125488	-0.422249	0.00157928	0.0583954	-0.321194	0.223999	-0.220284	-0.186523	-0.165092		9.89924	-0.192371	0.261528	0.458496	0.385994	0.560635	0.422352	0.206074	0.411877	0.71785	0.578484
		9.90948	-0.59938	-0.206718	-0.492012	-0.0403252	0.0332184	-0.341904	0.212994	-0.265823	-0.165504	-0.146862		9.90948	-0.264496	0.314491	0.376114	0.505131	0.502548	0.444706	0.207291	0.447647	0.670631	0.437111
		9.91972	-0.559444	-0.382633	-0.471554	-0.0540199	0.000148773	-0.407478	0.258999	-0.256332	-0.268181	-0.0606155		9.91972	-0.310486	0.253853	0.283653	0.464695	0.514324	0.415699	0.20787	0.517639	0.669487	0.331409
		9.92996	-0.51807	-0.412476	-0.466888	-0.0760269	-0.00184631	-0.396523	0.217499	-0.288742	-0.198971	-0.034996		9.92996	-0.378365	0.238506	0.313847	0.431366	0.56707	0.479263	0.203594	0.549454	0.663963	0.386757
		9.9402	-0.562225	-0.382408	-0.449249	-0.152859	-0.0172958	-0.445099	0.159676	-0.246117	-0.174412	0.00440216		9.9402	-0.348839	0.275749	0.358265	0.428123	0.653404	0.509506	0.315983	0.486652	0.564854	0.443451
		9.95044	-0.610966	-0.39743	-0.437969	-0.215374	-0.118988	-0.465054	0.230469	-0.182194	-0.169392	0.0989838		9.95044	-0.288479	0.260204	0.314587	0.353367	0.553543	0.45689	0.38591	0.540718	0.472984	0.514084
		9.96068	-0.703869	-0.365108	-0.489517	-0.282703	-0.221321	-0.362938	0.146347	-0.101479	-0.0638428	0.1133		9.96068	-0.312489	0.267155	0.373871	0.254616	0.525635	0.439445	0.35611	0.552456	0.415882	0.469582
		9.97092	-0.735588	-0.443016	-0.560841	-0.311314	-0.190029	-0.336021	0.196663	-0.117409	-0.194832	0.0227814		9.97092	-0.313274	0.244396	0.391403	0.257454	0.607521	0.426498	0.26619	0.547703	0.44252	0.398308
		9.98116	-0.61726	-0.441833	-0.642654	-0.292549	-0.20636	-0.317924	0.257004	-0.131531	-0.250404	-0.0158882		9.98116	-0.207764	0.264709	0.343578	0.306282	0.577744	0.422653	0.155602	0.510448	0.43544	0.317436
		9.9914	-0.526676	-0.429222	-0.68787	-0.282177	-0.302349	-0.418671	0.250237	-0.244389	-0.333614	-0.0115967		9.9914	-0.255543	0.217812	0.387844	0.33099	0.61253	0.410717	0.159328	0.544254	0.496254	0.420578
		10.0016	-0.525318	-0.546654	-0.663826	-0.340424	-0.279533	-0.476212	0.154095	-0.33762	-0.358234	-0.0109787		10.0016	-0.346703	0.139244	0.408237	0.289219	0.544563	0.362938	0.230282	0.495251	0.580772	0.484188
		10.0119	-0.608345	-0.511497	-0.698288	-0.374146	-0.34481	-0.464268	0.139393	-0.273762	-0.340305	-0.0640831		10.0119	-0.366005	0.213711	0.452576	0.174229	0.568146	0.315819	0.233692	0.472862	0.590031	0.405876
		10.0221	-0.63607	-0.402901	-0.666088	-0.387329	-0.411018	-0.449833	0.134735	-0.195473	-0.312576	-0.105927		10.0221	-0.378902	0.32243	0.391975	0.142712	0.56916	0.431786	0.223312	0.58004	0.525208	0.443394
		10.0324	-0.608368	-0.378044	-0.609203	-0.42028	-0.469204	-0.489613	0.111561	-0.272388	-0.292313	-0.14082		10.0324	-0.46521	0.32634	0.293297	0.0969582	0.497517	0.299343	0.147121	0.64109	0.594467	0.447124
		10.0426	-0.516018	-0.350662	-0.619682	-0.412258	-0.522743	-0.59795	0.179771	-0.261185	-0.209747	-0.138412		10.0426	-0.414459	0.307743	0.412552	0.114044	0.51902	0.30056	0.0720673	0.63924	0.642578	0.386032
		10.0528	-0.60421	-0.508659	-0.558624	-0.399506	-0.52174	-0.623497	0.0832825	-0.220406	-0.311058	-0.0762634		10.0528	-0.380714	0.273117	0.348083	0.152905	0.584499	0.423775	0.151047	0.547951	0.524075	0.327572
		10.0631	-0.574345	-0.484104	-0.611874	-0.381607	-0.42469	-0.561581	0.00183868	-0.228153	-0.403019	-0.0561905		10.0631	-0.398224	0.260384	0.314228	0.208824	0.584538	0.447243	0.226173	0.580257	0.547974	0.327484
		10.0733	-0.549469	-0.486122	-0.620621	-0.397789	-0.400505	-0.611847	-0.108776	-0.227234	-0.342148	-0.057518		10.0733	-0.30299	0.274166	0.28492	0.232521	0.608078	0.520462	0.257881	0.624546	0.501579	0.332794
		10.0836	-0.495514	-0.517887	-0.681801	-0.369282	-0.436672	-0.53479	-0.126705	-0.289173	-0.414604	-0.102158		10.0836	-0.345222	0.274475	0.303062	0.218765	0.566727	0.512131	0.271408	0.54974	0.575954	0.373547
		10.0938	-0.410973	-0.459713	-0.65052	-0.331444	-0.356907	-0.551449	-0.151119	-0.346073	-0.356277	-0.137718		10.0938	-0.306564	0.248379	0.268635	0.236996	0.575691	0.457245	0.243847	0.529774	0.487701	0.409729
		10.104	-0.413048	-0.492916	-0.732338	-0.373802	-0.315685	-0.505608	-0.15913	-0.272057	-0.259815	-0.0973892		10.104	-0.305733	0.146118	0.208488	0.265106	0.609154	0.393764	0.14669	0.552639	0.50288	0.370304
		10.1143	-0.396427	-0.559959	-0.828178	-0.429352	-0.344032	-0.553902	-0.0871506	-0.257336	-0.281303	-0.0612831		10.1143	-0.347477	0.187405	0.272495	0.133984	0.583355	0.485344	0.171204	0.548538	0.455101	0.445709
		10.1245	-0.52721	-0.522682	-0.751728	-0.384136	-0.347172	-0.651108	-0.0754929	-0.320969	-0.311157	-0.22646		10.1245	-0.460346	0.238403	0.379795	0.0732956	0.425301	0.6087	0.19788	0.595146	0.71003	0.460514
		10.1348	-0.644455	-0.413738	-0.611004	-0.291595	-0.401817	-0.684807	-0.0797119	-0.471443	-0.348442	-0.297745		10.1348	-0.483139	0.338253	0.457344	0.13308	0.425117	0.617535	0.220123	0.594917	1.09898	0.435574
		10.145	-0.65218	-0.371559	-0.578316	-0.268932	-0.517471	-0.670349	-0.195801	-0.452801	-0.387894	-0.226364		10.145	-0.456722	0.444874	0.375111	0.113693	0.462288	0.540108	0.187035	0.688713	1.0098	0.412766
		10.1552	-0.573524	-0.428329	-0.577374	-0.272285	-0.551529	-0.560898	-0.171871	-0.432404	-0.496574	-0.255173		10.1552	-0.305229	0.369102	0.315388	0.0539856	0.443192	0.53727	0.134438	0.71376	0.845798	0.39669
		10.1655	-0.460419	-0.481663	-0.52132	-0.280186	-0.461384	-0.562511	-0.106998	-0.408089	-0.545902	-0.277172		10.1655	-0.301369	0.326569	0.406963	0.00771713	0.466934	0.501808	0.13512	0.706188	0.616653	0.31913
		10.1757	-0.513741	-0.558323	-0.508152	-0.339684	-0.485668	-0.55872	-0.0638809	-0.41848	-0.562393	-0.344727		10.1757	-0.314442	0.323692	0.342331	-0.0229034	0.439087	0.5606	0.195927	0.665489	0.550446	0.291367
		10.186	-0.498352	-0.508533	-0.590725	-0.35778	-0.543564	-0.592121	-0.066658	-0.414677	-0.583324	-0.319118		10.186	-0.330338	0.251991	0.322456	0.0200119	0.524315	0.510796	0.252525	0.597221	0.494869	0.208817
		10.1962	-0.575554	-0.499878	-0.69178	-0.247822	-0.530548	-0.518906	-0.053154	-0.425026	-0.542007	-0.301941		10.1962	-0.356834	0.221748	0.211079	0.139252	0.592606	0.447685	0.152058	0.441784	0.530346	0.334686
		10.2064	-0.620838	-0.491684	-0.701008	-0.244938	-0.502693	-0.626129	-0.0743713	-0.504742	-0.541267	-0.374763		10.2064	-0.37376	0.220291	0.230354	0.239056	0.60144	0.473206	0.24287	0.431221	0.534073	0.428146
		10.2167	-0.63369	-0.500816	-0.676056	-0.262486	-0.415131	-0.643383	-0.0840034	-0.402088	-0.567909	-0.436825		10.2167	-0.326569	0.240692	0.270325	0.209911	0.504692	0.531776	0.14159	0.495689	0.53521	0.425133
		10.2269	-0.557205	-0.509438	-0.661644	-0.239223	-0.280899	-0.584755	-0.134956	-0.382195	-0.564354	-0.396713		10.2269	-0.335041	0.265137	0.219208	0.176128	0.43531	0.473518	0.177116	0.562233	0.492462	0.502045
		10.2372	-0.515266	-0.537762	-0.669476	-0.345047	-0.244339	-0.600441	-0.157066	-0.470432	-0.587532	-0.398071		10.2372	-0.314396	0.190838	0.269348	0.0800323	0.453346	0.535637	0.237934	0.612457	0.522488	0.578587
		10.2474	-0.479931	-0.55954	-0.607605	-0.404018	-0.298607	-0.576897	-0.0797691	-0.489697	-0.61277	-0.393696		10.2474	-0.258022	0.142273	0.220745	0.0682297	0.556938	0.553364	0.103371	0.654022	0.431911	0.533287
		10.2576	-0.370163	-0.505695	-0.659531	-0.339218	-0.389206	-0.504181	-0.00579071	-0.490398	-0.668655	-0.465363		10.2576	-0.203999	0.158638	0.214283	0.0908546	0.510639	0.552139	0.0541992	0.601692	0.442085	0.42878
		10.2679	-0.454174	-0.565609	-0.61261	-0.323242	-0.513157	-0.422726	0.00317383	-0.536072	-0.677357	-0.517483		10.2679	-0.126823	0.276367	0.131306	0.157017	0.505287	0.645599	0.0336723	0.616188	0.42688	0.381905
		10.2781	-0.509701	-0.618118	-0.543232	-0.318306	-0.522133	-0.450512	0.0351257	-0.553452	-0.615082	-0.400753		10.2781	-0.221481	0.333076	0.0462456	0.16362	0.503082	0.589603	0.0731544	0.705997	0.581757	0.384037
		10.2884	-0.443645	-0.516815	-0.568756	-0.262924	-0.491795	-0.47842	0.0279579	-0.470394	-0.556931	-0.34481		10.2884	-0.15181	0.349529	0.109024	0.0912361	0.586647	0.443253	0.182877	0.585327	0.557701	0.345726
		10.2986	-0.46986	-0.434776	-0.547024	-0.215931	-0.549812	-0.406593	-0.0536652	-0.38546	-0.566017	-0.362366		10.2986	-0.154789	0.410397	0.187836	0.0681343	0.585136	0.407379	0.233562	0.527184	0.438271	0.2747
		10.3088	-0.529205	-0.322193	-0.48098	-0.177132	-0.542603	-0.393936	-0.103554	-0.467773	-0.557896	-0.501892		10.3088	-0.191536	0.339882	0.190243	0.0132256	0.480885	0.353226	0.240032	0.564018	0.397953	0.271828
		10.3191	-0.496872	-0.351185	-0.541695	-0.160118	-0.422367	-0.317989	-0.022541	-0.535484	-0.498615	-0.541969		10.3191	-0.193779	0.321739	0.107018	-0.0199394	0.466019	0.415192	0.255138	0.614578	0.355751	0.321659
		10.3293	-0.455746	-0.468391	-0.569721	-0.274883	-0.356087	-0.303516	0.00776291	-0.53756	-0.445637	-0.398743		10.3293	-0.171646	0.32552	0.193939	-0.0679893	0.412926	0.438435	0.151009	0.564663	0.36692	0.414722
		10.3396	-0.485619	-0.464928	-0.624176	-0.33065	-0.397415	-0.278374	0.069622	-0.497852	-0.618778	-0.280128		10.3396	-0.173813	0.380653	0.290222	-0.117287	0.276939	0.446789	0.0409927	0.487549	0.404232	0.444492
		10.3498	-0.559181	-0.385342	-0.596519	-0.286945	-0.491867	-0.334175	0.0322952	-0.499496	-0.595745	-0.360985		10.3498	-0.254616	0.262436	0.350254	-0.0371132	0.39323	0.456482	0.0246582	0.429234	0.498859	0.518173
		10.36	-0.566383	-0.444542	-0.530373	-0.260277	-0.503407	-0.424942	-0.0292397	-0.403946	-0.51392	-0.314709		10.36	-0.246658	0.114578	0.198048	-0.00569153	0.438278	0.366196	0.0250893	0.445908	0.527081	0.557335
		10.3703	-0.482124	-0.45713	-0.562607	-0.294609	-0.482094	-0.419231	-0.0978813	-0.347122	-0.583157	-0.232262		10.3703	-0.198093	0.142521	0.248581	-0.0896034	0.391212	0.370804	0.00746918	0.587997	0.545654	0.533146
		10.3805	-0.469368	-0.497406	-0.545761	-0.308666	-0.504982	-0.346416	-0.166389	-0.33321	-0.647507	-0.23064		10.3805	-0.178631	0.236694	0.344318	-0.215775	0.461037	0.416344	-0.0364227	0.523457	0.434574	0.419983
		10.3908	-0.462685	-0.495918	-0.669228	-0.331482	-0.468513	-0.283428	-0.140175	-0.34927	-0.653252	-0.206573		10.3908	-0.165001	0.182327	0.363914	-0.22448	0.474232	0.367588	-0.0492249	0.563393	0.407211	0.249546
		10.401	-0.403343	-0.42952	-0.647842	-0.27203	-0.469658	-0.187202	-0.15596	-0.387642	-0.66856	-0.266453		10.401	-0.168186	0.131592	0.296898	-0.130909	0.479668	0.419838	0.00537109	0.605354	0.432247	0.310928
		10.4112	-0.498005	-0.3507	-0.620934	-0.229187	-0.469528	-0.175472	-0.139748	-0.376198	-0.667488	-0.347385		10.4112	-0.105911	0.0878639	0.264103	-0.116142	0.379333	0.413902	0.0297165	0.533001	0.445709	0.363693
		10.4215	-0.293465	-0.25024	-0.601166	-0.306698	-0.466007	-0.341244	-0.162159	-0.381035	-0.719994	-0.26606		10.4215	-0.074379	0.0698738	0.273785	-0.11422	0.306305	0.187798	0.0389023	0.501068	0.388607	0.339897
		10.4317	0.144154	-0.201141	-0.535091	-0.288425	-0.561184	-0.40873	-0.167831	-0.397118	-0.703224	-0.222645		10.4317	-0.0934067	0.0797691	0.262348	-0.144497	0.324554	0.246803	0.0071106	0.398438	0.267681	0.278275
		10.442	0.0847244	-0.279305	-0.563847	-0.271854	-0.560898	-0.327358	-0.158535	-0.393044	-0.730499	-0.313828		10.442	-0.101463	0.142941	0.159065	-0.0804482	0.371975	0.404709	-0.0141068	0.415485	0.356621	0.286777
		10.4522	-0.0321007	-0.300045	-0.530132	-0.291153	-0.419205	-0.334473	-0.136623	-0.353798	-0.677071	-0.42717		10.4522	-0.176842	0.181503	0.140888	-0.0543518	0.373825	0.374588	0.00376129	0.466007	0.31739	0.337261
		10.4624	-0.199638	-0.306999	-0.50301	-0.257584	-0.420399	-0.488815	-0.107952	-0.271713	-0.686401	-0.374908		10.4624	-0.26265	0.0504189	0.177448	-0.0632591	0.45739	0.354546	0.0424232	0.419315	0.206097	0.451096
		10.4727	-0.308975	-0.237366	-0.562065	-0.247108	-0.45504	-0.503334	-0.0914421	-0.19669	-0.730175	-0.336082		10.4727	-0.322681	0.0821533	0.226292	-0.0501556	0.490658	0.406662	0.082222	0.434929	0.214561	0.501785
		10.4829	-0.437054	-0.157089	-0.526688	-0.316853	-0.412235	-0.377388	-0.0322762	-0.281162	-0.665375	-0.241299		10.4829	-0.308338	0.0854645	0.216881	-0.0906754	0.607784	0.334724	0.0896301	0.449211	0.335533	0.555103
		10.4932	-0.431271	-0.172394	-0.382133	-0.223457	-0.335785	-0.265392	-0.103458	-0.377594	-0.657433	-0.273533		10.4932	-0.321037	0.0353508	0.275436	-0.0514679	0.624077	0.331013	0.193295	0.458923	0.292057	0.54422
		10.5034	-0.418125	-0.218498	-0.336586	-0.123211	-0.300617	-0.296028	-0.0900116	-0.470657	-0.656506	-0.278435		10.5034	-0.235382	-0.0322723	0.279541	-0.0651436	0.59391	0.373192	0.235779	0.486095	0.243229	0.437469
		10.5136	-0.353298	-0.124367	-0.417107	-0.157089	-0.286755	-0.307125	0.0730324	-0.437042	-0.648849	-0.31353		10.5136	-0.237923	0.0189133	0.310318	-0.205414	0.556168	0.31995	0.241142	0.527565	0.231632	0.295574
		10.5239	-0.359924	-0.145874	-0.468979	-0.232384	-0.316662	-0.349518	0.110226	-0.421082	-0.668736	-0.399551		10.5239	-0.18042	0.0544853	0.264629	-0.219948	0.565189	0.301903	0.229462	0.620922	0.29026	0.251549
		10.5341	-0.357574	-0.178036	-0.432987	-0.217445	-0.34742	-0.344929	0.0711823	-0.41872	-0.734993	-0.336372		10.5341	-0.125893	0.0891266	0.278728	-0.183018	0.529976	0.407681	0.12595	0.53553	0.391396	0.320618
		10.5444	-0.316654	-0.22789	-0.467834	-0.196716	-0.32283	-0.438759	-0.0410881	-0.422165	-0.705013	-0.293869		10.5444	-0.0874443	0.1376	0.241226	-0.17981	0.437458	0.383362	0.0551872	0.461952	0.37014	0.389633
		10.5546	-0.20079	-0.100868	-0.421543	-0.132149	-0.287193	-0.446568	-0.00258636	-0.434883	-0.662457	-0.321304		10.5546	-0.116364	0.127071	0.280994	-0.125114	0.413639	0.353367	0.0575371	0.472122	0.356659	0.333412
		10.5648	-0.25975	-0.140198	-0.3843	-0.049942	-0.243649	-0.43045	0.0348244	-0.426277	-0.724621	-0.357433		10.5648	-0.204117	0.106819	0.268848	-0.0906868	0.415535	0.370495	0.143761	0.416271	0.403053	0.290924
		10.5751	-0.272484	-0.17466	-0.439713	-0.00757599	-0.235424	-0.385246	-0.00972366	-0.357471	-0.81913	-0.345772		10.5751	-0.176949	0.102146	0.178093	-0.0286751	0.454514	0.496834	0.108513	0.410408	0.391525	0.271671
		10.5853	-0.310417	-0.19035	-0.437042	-0.00528717	-0.30447	-0.282631	-0.0194397	-0.337692	-0.894707	-0.318085		10.5853	-0.171288	0.148647	0.136654	-0.149376	0.441948	0.470528	0.0645332	0.480431	0.326855	0.210922
		10.5956	-0.322884	-0.119705	-0.442764	-0.0709953	-0.253124	-0.29155	-0.0310059	-0.307316	-0.868507	-0.31551		10.5956	-0.240364	0.251812	0.19899	-0.113335	0.479713	0.393303	0.157269	0.541504	0.222118	0.278408
		10.6058	-0.310131	-0.0572052	-0.355015	-0.110336	-0.197788	-0.292488	0.00808716	-0.275024	-0.81012	-0.290165		10.6058	-0.206429	0.239746	0.270493	-0.0993881	0.479836	0.412003	0.151127	0.489197	0.294201	0.324387
		10.616	-0.399418	-0.0658112	-0.312611	-0.0385475	-0.189407	-0.217064	0.0283394	-0.238579	-0.770744	-0.194275		10.616	-0.192467	0.173267	0.243862	-0.0920944	0.442711	0.414188	0.130756	0.42321	0.367157	0.314754
		10.6263	-0.395485	-0.0306244	-0.232166	-0.141632	-0.184425	-0.26947	0.0800018	-0.207561	-0.737518	-0.0900612		10.6263	-0.191338	0.124271	0.244888	-0.0807343	0.494392	0.472565	0.0644531	0.380188	0.347263	0.280029
		10.6365	-0.34301	-0.00283051	-0.352749	-0.176701	-0.221169	-0.237221	0.0158463	-0.21051	-0.749798	-0.161873		10.6365	-0.16288	0.115829	0.294907	-0.144653	0.559433	0.438469	0.0170403	0.433796	0.280518	0.340374
		10.6468	-0.306782	-0.0388565	-0.364536	-0.16095	-0.246605	-0.234623	0.0123291	-0.256023	-0.68837	-0.245354		10.6468	-0.246292	0.156864	0.261848	-0.109848	0.471336	0.420967	0.0465469	0.521652	0.308865	0.334541
		10.657	-0.326771	-0.112377	-0.468552	-0.210922	-0.294968	-0.252602	-0.0333405	-0.224602	-0.582714	-0.240131		10.657	-0.229042	0.238937	0.138466	-0.0817604	0.399479	0.451797	0.0825577	0.635227	0.347408	0.326553
		10.6672	-0.288307	-0.113911	-0.461777	-0.155125	-0.218529	-0.18185	0.0258255	-0.230545	-0.547451	-0.251358		10.6672	-0.227657	0.222118	0.145309	-0.148479	0.430122	0.33408	0.0284271	0.552376	0.308689	0.423256
		10.6775	-0.258144	-0.215706	-0.436005	-0.160355	-0.172386	-0.0957451	0.103916	-0.308617	-0.589478	-0.178944		10.6775	-0.317223	0.142567	0.191776	-0.0990677	0.392658	0.299961	-0.0918465	0.456127	0.15189	0.395149
		10.6877	-0.215538	-0.259323	-0.375694	-0.0864601	-0.188896	-0.15937	0.118938	-0.383625	-0.519821	-0.167309		10.6877	-0.361164	0.180397	0.191078	-0.170555	0.402077	0.362389	-0.100475	0.472755	0.298088	0.337334
		10.698	-0.119408	-0.198383	-0.261185	-0.136635	-0.29908	-0.247616	0.0969467	-0.401375	-0.463806	-0.188274		10.698	-0.307091	0.316818	0.114235	-0.274998	0.447544	0.329144	-0.0752869	0.524155	0.423321	0.327366
		10.7082	-0.127277	-0.201485	-0.226135	-0.112076	-0.313946	-0.244682	0.0697174	-0.441204	-0.4286	-0.142094		10.7082	-0.172585	0.348869	0.129242	-0.181023	0.446877	0.330528	-0.131886	0.517899	0.468178	0.303539
		10.7184	-0.171276	-0.157589	-0.206028	-0.140438	-0.343761	-0.199829	0.101055	-0.428688	-0.442253	-0.0671577		10.7184	-0.18932	0.318462	0.263054	-0.216324	0.3908	0.219551	-0.101559	0.529045	0.374706	0.263222
		10.7287	-0.266739	-0.120422	-0.180038	-0.00955582	-0.436005	-0.104961	0.102463	-0.36301	-0.516258	-0.155746		10.7287	-0.264278	0.266521	0.205509	-0.103825	0.418941	0.250298	-0.092083	0.54826	0.320881	0.163956
		10.7389	-0.273796	-0.0292892	-0.241871	0.0499306	-0.288124	-0.0459633	0.063839	-0.314995	-0.543209	-0.179108		10.7389	-0.252289	0.337666	0.169914	-0.0667038	0.507538	0.259003	-0.125843	0.441677	0.416679	0.216763
		10.7492	-0.300213	-0.12471	-0.257095	-0.0388489	-0.300117	-0.0222397	0.0560684	-0.304089	-0.435921	-0.307735		10.7492	-0.254265	0.320801	0.091774	-0.0894012	0.422493	0.321323	-0.113766	0.533409	0.444931	0.18441
		10.7594	-0.235283	-0.00247574	-0.259872	-0.0592651	-0.232857	-0.169296	-0.0454636	-0.214046	-0.443634	-0.376339		10.7594	-0.240429	0.323471	0.164158	-0.208561	0.358479	0.28159	-0.105652	0.512798	0.38372	0.0900345
		10.7696	-0.182648	0.0503464	-0.233612	-0.0831451	-0.224346	-0.226471	0.0268593	-0.156937	-0.451466	-0.374756		10.7696	-0.136345	0.409588	0.175041	-0.328903	0.366386	0.262604	-0.0519333	0.356991	0.323875	0.161667
		10.7799	-0.0550117	0.0224876	-0.244293	-0.130161	-0.262875	-0.144611	0.0491524	-0.137016	-0.419914	-0.343189		10.7799	-0.158173	0.42511	0.158829	-0.259357	0.421684	0.277122	-0.00849533	0.309807	0.379459	0.267498
		10.7901	-0.127598	-0.0672989	-0.214977	-0.14809	-0.337738	-0.0727501	0.108448	-0.132141	-0.39043	-0.35836		10.7901	-0.196236	0.318108	0.261623	-0.123161	0.484138	0.257572	0.030941	0.209969	0.407181	0.249378
		10.8004	-0.177391	-0.179134	-0.199234	-0.0489578	-0.334938	-0.136982	0.125233	-0.128815	-0.430977	-0.284977		10.8004	-0.229042	0.373882	0.288456	-0.0393677	0.525181	0.160641	-0.0328712	0.23349	0.442928	0.28669
		10.8106	-0.15155	-0.242599	-0.138493	-0.0576096	-0.24292	-0.172707	0.052372	-0.164734	-0.403664	-0.229153		10.8106	-0.253193	0.343998	0.27253	-0.00532532	0.483044	0.0919647	-0.177078	0.282043	0.347607	0.209324
		10.8208	-0.12978	-0.232491	-0.0964279	-0.140388	-0.211201	-0.109467	0.0408211	-0.169621	-0.38303	-0.216614		10.8208	-0.191826	0.423378	0.160488	-0.0167313	0.415558	0.24044	-0.128944	0.413124	0.224979	0.263947
		10.8311	-0.137718	-0.171131	-0.103767	-0.177441	-0.213692	0.0414429	0.0377693	-0.260841	-0.374111	-0.200672		10.8311	-0.136154	0.436348	0.198143	-0.132889	0.476582	0.309578	-0.0849648	0.379295	0.232849	0.285381
		10.8413	-0.0909195	-0.178371	-0.144047	-0.211853	-0.211464	0.0926781	0.0927734	-0.196991	-0.306961	-0.209938		10.8413	-0.0179214	0.378532	0.268299	-0.0304642	0.550873	0.34153	-0.0130081	0.410133	0.282089	0.30814
		10.8516	-0.0810318	-0.205391	-0.203892	-0.24527	-0.186356	0.0505981	0.202194	-0.115868	-0.221142	-0.090107		10.8516	0.0938339	0.413483	0.266594	0.0627823	0.47316	0.337418	-0.0904617	0.472984	0.241486	0.197536
		10.8618	-0.0794144	-0.177353	-0.221954	-0.180897	-0.222931	-0.00825882	0.155773	-0.0928268	-0.22332	-0.0344009		10.8618	0.0849915	0.483841	0.259552	0.0347557	0.41531	0.320419	-0.149208	0.45816	0.250359	0.142773
		10.872	0.00925446	-0.115974	-0.163612	-0.0587654	-0.208611	-0.0529709	0.135151	-0.0400887	-0.207466	-0.0631676		10.872	0.0257111	0.600418	0.262444	-0.0251846	0.407261	0.298317	-0.036232	0.478024	0.308521	0.207657
		10.8823	0.0989227	-0.0599251	-0.174866	-0.0656929	-0.234432	0.0128784	0.0771675	-0.0471535	-0.258408	-0.155602		10.8823	0.107628	0.556835	0.203308	-0.00533295	0.336498	0.240986	0.0198441	0.52367	0.321739	0.224384
		10.8925	0.0157509	-0.0473213	-0.1119	-0.0496483	-0.266403	-0.0414314	0.0856056	-0.0825119	-0.2766	-0.169262		10.8925	-0.00125504	0.533287	0.158516	-0.0802574	0.197357	0.206631	0.0907249	0.487358	0.310188	0.215061
		10.9028	-0.0346603	-0.120731	-0.0954247	-0.0110703	-0.305733	0.00582123	0.122372	-0.0779724	-0.245613	-0.0837288		10.9028	-0.0262184	0.511021	0.181622	-0.042099	0.224392	0.230736	0.0535889	0.38665	0.321716	0.146851
		10.913	-0.0144806	-0.149673	-0.0819168	-0.0666008	-0.283943	0.0419426	0.0969925	-0.17609	-0.305424	-0.0941467		10.913	0.0652237	0.416286	0.129993	-0.00547791	0.314865	0.1306	0.0109978	0.38604	0.404556	0.13443
		10.9232	-0.0861511	-0.12178	-0.0764923	-0.126667	-0.23745	-0.00669479	0.121918	-0.219696	-0.305092	-0.063549		10.9232	0.0703163	0.41489	0.145657	-0.0895805	0.368996	0.103466	-0.0621376	0.405365	0.398964	0.164238
		10.9335	-0.129814	-0.162811	-0.145638	-0.162445	-0.195309	-0.0707321	0.0718269	-0.174782	-0.269096	-0.0820122		10.9335	0.0649757	0.452084	0.128899	-0.0385933	0.41272	0.174347	0.0153961	0.391262	0.274738	0.125439
		10.9437	-0.0714264	-0.20245	-0.0884628	-0.260197	-0.196358	-0.101822	-0.00255966	-0.1129	-0.30986	-0.0877724		10.9437	0.0317497	0.438614	0.096756	-0.0419693	0.433033	0.25367	0.0453568	0.433144	0.295631	-0.342743
		10.954	-0.0763855	-0.249779	-0.184341	-0.224846	-0.232754	-0.0198212	0.00478363	-0.150246	-0.344463	-0.0380707		10.954	-0.0102692	0.447006	0.22126	-0.0656052	0.499195	0.192993	0.166328	0.38522	0.313492	-0.150459
		10.9642	-0.12339	-0.286423	-0.189171	-0.182194	-0.20002	0.0750923	-0.0234795	-0.117691	-0.312981	0.00037384		10.9642	0.0229187	0.317879	0.185078	-0.103657	0.400585	0.164635	0.110107	0.473682	0.285706	0.0114059
		10.9744	-0.0749931	-0.226421	-0.183601	-0.190681	-0.188583	0.02771	0.046814	-0.0985107	-0.248905	0.015358		10.9744	0.0355072	0.271172	0.228947	-0.103981	0.40427	0.191563	0.0377007	0.513641	0.24062	0.189407
		10.9847	-0.0579529	-0.145348	-0.15659	-0.236221	-0.166149	-0.0505791	0.0706329	-0.157162	-0.278816	-0.0311966		10.9847	0.0135269	0.160141	0.228161	0.00583649	0.433643	0.257072	0.0578346	0.368721	0.22134	0.22245
		10.9949	-0.0392532	-0.0573959	-0.156509	-0.182568	-0.219936	-0.114029	0.138931	-0.244057	-0.290485	-0.0686607		10.9949	-0.0288658	0.167782	0.139565	0.00939941	0.547855	0.205223	0.0644302	0.292068	0.210564	0.175842
		11.0052	-0.0660744	-0.0713692	-0.0881996	-0.224194	-0.316154	-0.100311	0.269871	-0.222359	-0.302261	0.0734138		11.0052	-0.0259933	0.199955	0.012249	0.00730133	0.588329	0.165779	0.0792427	0.350613	0.154026	0.297398
		11.0154	-0.0553207	-0.127373	-0.061451	-0.201092	-0.428829	-0.100098	0.387802	-0.200695	-0.383602	0.181118		11.0154	0.00463104	0.241726	-0.00919342	-0.106224	0.564156	0.183876	0.00310516	0.382919	0.215237	0.369797
		11.0256	0.0282669	-0.170273	-0.192699	-0.241837	-0.432747	-0.162682	0.317245	-0.120064	-0.378738	0.178398		11.0256	-0.0641632	0.327152	-0.00910187	-0.103291	0.504738	0.225777	0.00244904	0.405342	0.33992	0.401775
		11.0359	0.13483	-0.105629	-0.268215	-0.243126	-0.31086	-0.0786896	0.308258	-0.0333176	-0.290787	0.0611839		11.0359	-0.0317726	0.285824	-0.114017	-0.100452	0.473507	0.2603	-0.0472946	0.390141	0.328217	0.414879
		11.0461	0.102295	-0.0439758	-0.324665	-0.221962	-0.250515	-0.0148849	0.30349	-0.0166283	-0.226387	-0.0534401		11.0461	-0.0470314	0.215347	-0.183731	-0.0496788	0.451622	0.271503	-0.00611877	0.369568	0.334946	0.421638
		11.0564	0.0737228	-0.105415	-0.242825	-0.287853	-0.28318	-0.0113678	0.221268	-0.0831566	-0.18391	-0.015007		11.0564	-0.115578	0.204903	-0.237385	-0.0737343	0.358494	0.213821	-0.00662231	0.381332	0.297577	0.445087
		11.0666	0.0189667	-0.120445	-0.164886	-0.327965	-0.187943	0.0120773	0.165016	-0.121349	-0.162613	-0.0936356		11.0666	-0.164169	0.218758	-0.200909	-0.0869827	0.284798	0.181477	0.00674057	0.389809	0.304169	0.317734
		11.0768	0.0214233	-0.0798187	-0.185246	-0.27861	-0.197586	0.00363922	0.165943	-0.13282	-0.228542	-0.0911331		11.0768	-0.177341	0.208694	-0.233143	-0.125843	0.267044	0.16106	0.000675201	0.412354	0.422031	0.264557
		11.0871	0.0271225	-0.020607	-0.192112	-0.236076	-0.278515	-0.000175476	0.1856	-0.0942307	-0.290283	-0.0877457		11.0871	-0.0972824	0.136311	-0.250736	-0.187859	0.280052	0.10894	-0.00909042	0.447887	0.41526	0.392063
		11.0973	0.10498	-0.064106	-0.205513	-0.256462	-0.337898	-0.0327454	0.172478	-0.0734406	-0.278648	-0.0635567		11.0973	-0.0614243	0.0809517	-0.226219	-0.155693	0.218376	0.131783	-0.0282364	0.468025	0.306065	0.340683
		11.1076	0.0929413	-0.0751839	-0.20203	-0.214825	-0.269096	-0.0100937	0.125126	-0.125977	-0.226055	-0.0368462		11.1076	-0.00513458	0.0520058	-0.121243	-0.151237	0.159962	0.119049	-0.0951691	0.407753	0.316414	0.282822
		11.1178	0.054493	-0.114403	-0.159943	-0.203796	-0.289021	-0.0966873	0.0869331	-0.121532	-0.308167	-0.0214195		11.1178	-0.0215378	0.0313225	-0.167542	-0.248756	0.261944	0.0730934	-0.120823	0.333675	0.288162	0.286049
		11.128	0.0357895	0.0598564	-0.195572	-0.0950928	-0.219212	-0.0834427	0.113621	-0.110352	-0.340363	-0.0973167		11.128	0.0670013	-0.0176239	-0.199165	-0.277859	0.298103	0.0148697	-0.147549	0.203556	0.36412	0.35421
		11.1383	0.0226288	0.120739	-0.114712	-0.10788	-0.18457	-0.0877075	0.162663	-0.1852	-0.338039	-0.0693893		11.1383	0.122467	0.0777435	-0.178829	-0.276535	0.273067	0.0229187	-0.135334	0.20829	0.302368	0.418919
		11.1485	-0.0341835	0.0497246	-0.0262833	-0.124619	-0.147518	-0.111481	0.220139	-0.218662	-0.3069	-0.0339127		11.1485	0.0913925	0.0895348	-0.120705	-0.228603	0.182686	0.0306702	-0.114197	0.165218	0.391476	0.392014
		11.1588	-0.0240669	0.063839	0.00541687	-0.182503	-0.217518	-0.0383568	0.214939	-0.326176	-0.222343	-0.0900116		11.1588	0.0821686	0.0887222	-0.0143127	-0.1702	0.0621262	0.0186539	-0.24456	0.217327	0.314575	0.329765
		11.169	-0.128876	0.095932	-0.0242653	-0.177872	-0.214287	0.0187225	0.0759277	-0.367699	-0.182793	-0.0508423		11.169	0.115665	0.0329437	-0.0227737	-0.169342	0.0315742	-0.0706253	-0.272507	0.208134	0.257675	0.30106
		11.1792	-0.206383	0.12318	-0.141796	-0.170525	-0.145992	0.0323448	0.00806427	-0.214237	-0.176868	-0.0944328		11.1792	0.106995	0.0762177	-0.0753937	-0.206081	-0.0246353	-0.0123672	-0.230247	0.230354	0.224525	0.275986
		11.1895	-0.262367	0.185707	-0.108372	-0.252121	-0.133499	0.071579	0.0688858	-0.220406	-0.233955	-0.0683632		11.1895	0.203102	0.0960426	-0.123589	-0.296623	-0.146324	0.0398788	-0.250061	0.306026	0.198597	0.394615
		11.1997	-0.209328	0.130062	-0.19619	-0.240227	-0.108334	0.0881233	0.103752	-0.122543	-0.3363	-0.0895615		11.1997	0.135605	0.096138	-0.111588	-0.398842	-0.0599937	0.0680771	-0.262886	0.318451	0.13681	0.373966
		11.21	-0.217827	0.0826492	-0.230061	-0.191986	-0.166008	0.0108376	0.100929	-0.0544739	-0.327652	-0.0202255		11.21	0.0686722	0.112587	-0.078949	-0.394493	-0.108521	0.047905	-0.258484	0.283676	0.0897598	0.350674
		11.2202	-0.0699234	0.0065155	-0.254093	-0.229797	-0.171204	0.0180054	0.0578766	-0.105366	-0.318703	0.0589027		11.2202	0.0130501	0.114815	0.00914764	-0.361973	-0.124565	-0.0114021	-0.206383	0.156326	0.111717	0.263771
		11.2304	-0.10973	-0.0210228	-0.238045	-0.243492	-0.151932	-0.0500145	0.0182915	-0.137314	-0.298058	0.14328		11.2304	0.0816498	0.137466	0.0340385	-0.295025	-0.157913	-0.182899	-0.229374	0.133904	0.073307	0.249355
		11.2407	-0.170105	-0.183529	-0.193321	-0.184975	-0.0587311	-0.0727043	0.0835457	-0.173992	-0.242584	0.104908		11.2407	0.0890808	0.123329	-0.0456734	-0.294724	-0.141628	-0.172844	-0.358551	0.082119	0.0816269	0.142273
		11.2509	-0.207027	-0.46595	-0.206219	-0.0829773	-0.155586	0.0846519	0.0303802	-0.15453	-0.326096	0.0800514		11.2509	0.211376	0.161324	-0.0410156	-0.350292	-0.160233	-0.146214	-0.356441	-0.0170403	0.0474548	-0.0241585
		11.2612	-0.226662	-0.340172	-0.181717	-0.120842	-0.1922	0.167812	0.0279007	-0.143906	-0.319538	0.0720787		11.2612	0.271709	0.235851	-0.0462685	-0.393456	-0.154823	-0.0771828	-0.435764	-0.0268631	-0.00147247	-0.0683594
		11.2714	-0.178108	-0.24826	-0.117336	-0.249134	-0.256798	0.168663	-0.0342941	-0.0944214	-0.202477	0.0611191		11.2714	0.424438	0.265533	-0.0625305	-0.405304	-0.0542793	-0.146492	-0.457558	-0.0591812	0.0100441	-0.0540085
		11.2816	-0.15337	-0.147854	-0.145432	-0.273174	-0.19545	0.149948	0.0125313	-0.138924	-0.22604	-0.0225868		11.2816	0.546829	0.242504	-0.120098	-0.367218	-0.0404663	-0.147144	-0.45546	-0.111778	-0.00423431	-0.0525627
		11.2919	0.0282326	-0.118454	-0.121292	-0.153584	-0.144646	0.253952	-0.0524712	-0.114269	-0.15876	-0.00888824		11.2919	0.6409	0.210434	-0.0653419	-0.336678	-0.0194397	-0.151627	-0.402897	-0.127655	0.0661087	-0.0910454
		11.3021	0.0389862	-0.076828	-0.0625801	-0.198563	-0.141281	0.22718	0.025238	-0.181313	-0.106319	0.0778503		11.3021	0.563915	0.224693	-0.0198212	-0.377258	-0.0239792	-0.166241	-0.377312	0.00832748	0.0580864	-0.0691109
		11.3124	-0.0436249	-0.118919	-0.049839	-0.211987	-0.135273	0.184052	0.176865	-0.186749	-0.159355	0.0367928		11.3124	0.375969	0.299973	-0.0496292	-0.338799	-0.0574417	-0.237137	-0.355667	0.0425034	0.0153389	-0.0280304
		11.3226	-0.0485535	-0.127159	-0.0470734	-0.218433	-0.134262	0.172215	0.135769	-0.159012	-0.136417	-0.0137749		11.3226	0.304192	0.288265	-0.0625534	-0.226624	-0.0289116	-0.205341	-0.381081	0.109512	-0.00333023	-0.0361252
		11.3328	-0.0246849	-0.107212	-0.0539398	-0.226318	-0.0883446	0.208572	0.136841	-0.202831	-0.201401	-0.057991		11.3328	0.388916	0.316032	-0.00281906	-0.142414	-0.0691338	-0.129238	-0.365955	0.0982132	-0.152905	-0.0374947
		11.3431	-0.0171127	-0.0649872	-0.181206	-0.179276	-0.0625687	0.129204	0.121727	-0.201077	-0.238342	0.0306664		11.3431	0.315659	0.343529	0.0649376	-0.0667152	-0.0267677	-0.0900574	-0.366528	-0.0059433	-0.288025	-0.148136
		11.3533	-0.0324593	-0.0870667	-0.244339	-0.282665	-0.125786	0.112801	0.135101	-0.215382	-0.300667	0.0772781		11.3533	0.194042	0.394402	0.128468	0.0546532	0.0236206	-0.0845604	-0.346249	-0.0146942	-0.210243	-0.0706825
		11.3636	0.0276375	-0.119553	-0.221882	-0.322876	-0.189156	0.123348	0.217522	-0.174507	-0.283642	0.129379		11.3636	0.158684	0.403183	0.0410233	0.0422897	0.0951614	-0.0613861	-0.365513	-0.0628777	-0.206821	-0.00901794
		11.3738	0.0713387	-0.120323	-0.163574	-0.254166	-0.241337	0.132694	0.247223	-0.204884	-0.217232	0.11541		11.3738	0.148949	0.419682	0.0693512	-0.00658798	0.125416	-0.0161324	-0.351994	-0.0472145	-0.147804	-0.0322723
		11.384	-0.0315132	-0.202721	-0.156078	-0.217686	-0.147671	0.120655	0.260143	-0.212784	-0.133308	0.139156		11.384	0.285236	0.419098	0.0369644	-0.00840759	0.0496941	-0.00801849	-0.360817	-0.0171967	-0.107758	-0.13047
		11.3943	0.000919342	-0.228497	-0.217827	-0.266464	-0.0621872	0.16375	0.187714	-0.113838	-0.111614	0.126495		11.3943	0.320251	0.51833	0.181015	-0.045433	0.0545654	0.0509796	-0.372856	-0.0497017	-0.045269	-0.0583
		11.4045	0.0448837	-0.121922	-0.215454	-0.30838	-0.038166	0.228275	0.21706	-0.125309	-0.107941	0.0186005		11.4045	0.395126	0.548595	0.185638	-0.0279846	0.0657158	0.0451736	-0.336685	-0.16655	-0.0385361	-0.0246353
		11.4148	0.0138435	-0.0974121	-0.174007	-0.251122	0.0715065	0.205769	0.16996	-0.0876389	-0.144371	0.0519562		11.4148	0.374168	0.599045	0.212185	-0.0397835	0.158627	0.136192	-0.271805	-0.11211	-0.0610886	0.0774803
		11.425	-0.226063	-0.0484657	-0.124401	-0.145184	0.0726013	0.164848	0.130585	-0.091835	-0.164829	0.0217247		11.425	0.351349	0.582832	0.276287	0.116318	0.132004	0.172527	-0.260719	-0.0967331	0.107044	0.00437164
		11.4352	-0.271126	0.044281	-0.0995102	-0.150024	-0.000175476	0.12434	0.179676	-0.129616	-0.20269	0.0917587		11.4352	0.411076	0.533146	0.244587	0.14135	0.196663	0.213974	-0.202553	0.0616608	0.124104	0.0225868
		11.4455	-0.19817	-0.0289307	-0.145184	-0.142204	-0.0299873	0.120525	0.226631	-0.180359	-0.2076	0.0957527		11.4455	0.385563	0.481956	0.190697	-0.00298691	0.272568	0.195152	-0.104179	0.191231	0.152977	0.0246124
		11.4557	-0.122509	-0.182137	-0.214706	-0.172993	-0.0173645	0.0243073	0.304165	-0.197453	-0.1572	0.134949		11.4557	0.45541	0.425453	0.133579	0.0102463	0.195328	0.182167	-0.0361252	0.225513	0.19017	-0.0423279
		11.466	-0.144276	-0.174294	-0.185532	-0.165615	-0.0588531	0.0381622	0.31015	-0.17403	-0.172173	0.158394		11.466	0.523529	0.513405	0.2304	0.135334	0.189743	0.242859	0.00414276	0.284058	0.195545	-0.0169106
		11.4762	-0.126823	-0.126492	-0.126705	-0.158688	-0.111481	0.0764427	0.232281	-0.0957565	-0.236053	0.1315		11.4762	0.545914	0.444309	0.285919	0.19849	0.113148	0.344936	0.0405731	0.321323	0.110451	0.0323601
		11.4864	-0.144325	-0.0981293	-0.112305	-0.168999	-0.0926933	0.0922813	0.144615	-0.136131	-0.273975	0.152451		11.4864	0.60553	0.419315	0.320881	0.20575	0.0996056	0.352566	0.0171127	0.251644	0.0954208	0.0531845
		11.4967	-0.157089	-0.0662193	-0.126167	-0.221821	-0.120514	0.21936	0.0998535	-0.21505	-0.307926	0.234535		11.4967	0.618416	0.438515	0.142963	0.151127	0.19347	0.216228	0.0183029	0.231274	0.187309	0.00334549
		11.5069	-0.0452614	-0.0165558	-0.181385	-0.195381	-0.164829	0.316078	0.00895691	-0.157223	-0.263557	0.143616		11.5069	0.656181	0.383148	0.0526352	0.0431862	0.224049	0.26725	-0.0416183	0.229843	0.210556	0.0586929
		11.5172	-0.0457382	0.0018158	-0.229607	-0.152073	-0.242493	0.30407	0.104073	-0.181328	-0.269455	0.0657845		11.5172	0.650494	0.312012	0.054985	-0.0486908	0.205582	0.284451	-0.142342	0.264782	0.164062	0.0939217
		11.5274	-0.000732422	0.0197563	-0.226208	-0.123177	-0.139614	0.243607	0.135643	-0.118561	-0.253075	-0.0487175		11.5274	0.590748	0.402245	0.143211	0.00802612	0.135727	0.373978	-0.177105	0.275833	0.218742	0.175682
		11.5376	-0.0714035	0.0405922	-0.211987	-0.0135994	-0.0434036	0.0980301	0.184837	0.00331879	-0.170742	-0.023613		11.5376	0.672024	0.438293	0.169285	0.0512695	0.175983	0.36145	-0.119312	0.263016	0.274761	0.213535
		11.5479	-0.0819397	-0.0616417	-0.188671	-0.0884628	-0.0414467	-0.00198746	0.24065	0.0391846	-0.144478	0.0481644		11.5479	0.572151	0.364738	0.240761	0.026268	0.158829	0.348156	-0.0609818	0.263206	0.274223	0.177654
		11.5581	-0.0889511	-0.130116	-0.232357	-0.180145	-0.0264969	-0.0218735	0.267685	-0.0231857	-0.0396194	-0.00888062		11.5581	0.541241	0.204952	0.282543	-0.0698624	0.223763	0.385063	-0.0603104	0.322838	0.177818	0.199955
		11.5684	-0.134106	-0.158463	-0.237213	-0.162231	-0.0315514	0.0340614	0.190575	-0.0641289	-0.0363998	-0.0350113		11.5684	0.545258	0.2845	0.320831	-0.0515862	0.274555	0.319466	0.0135727	0.398952	0.284225	0.183208
		11.5786	-0.0760498	-0.0969124	-0.27145	-0.222549	-0.0304184	-0.0270805	0.135235	-0.155014	-0.100487	-0.0172462		11.5786	0.46534	0.400108	0.187645	-0.0462685	0.204079	0.185532	0.0785179	0.419823	0.268517	0.166138
		11.5888	0.0963249	-0.0308952	-0.134319	-0.225197	0.0521011	0.0621376	0.0906982	-0.160034	-0.0419312	0.0445976		11.5888	0.40123	0.415165	0.119812	0.0223808	0.196735	0.222595	0.0747375	0.33316	0.296814	0.196522
		11.5991	0.0975266	-0.0778618	-0.14846	-0.160706	0.0273972	0.0950012	0.0702438	-0.21566	-0.0727043	0.208534		11.5991	0.387272	0.402184	0.0844307	0.118858	0.248497	0.347702	0.0699615	0.263374	0.133602	0.122459
		11.6093	0.0334778	-0.0448189	-0.0544014	-0.129616	0.00380707	0.164524	0.16666	-0.340839	-0.0459137	0.130302		11.6093	0.468811	0.438675	0.109978	-0.00744629	0.319595	0.300282	0.0998688	0.243942	0.056427	0.125305
		11.6196	-0.0420685	-0.0151024	-0.0256386	-0.131767	-0.154911	0.231255	0.136929	-0.333344	-0.101578	0.0290451		11.6196	0.557861	0.394184	0.213631	0.0288315	0.32304	0.194233	0.137371	0.278648	0.135605	0.197998
		11.6298	-0.107643	0.0764885	-0.0557747	-0.157734	-0.00561142	0.224724	0.071579	-0.373264	-0.15522	0.113564		11.6298	0.579948	0.360783	0.187988	0.010437	0.266449	0.16927	0.170761	0.287613	0.182232	0.247566
		11.64	-0.080143	0.0740433	-0.028595	-0.105495	0.0661163	0.147346	0.0835342	-0.265179	-0.170296	0.0248489		11.64	0.575081	0.385136	0.151794	0.0277939	0.248543	0.119656	0.190395	0.352581	0.209969	0.235111
		11.6503	-0.0341377	0.105419	-0.0129089	-0.0500069	0.0747719	0.0853691	0.180618	-0.199516	-0.214706	0.0387726		11.6503	0.638493	0.332516	0.074501	0.14431	0.206131	0.126488	0.0887947	0.426918	0.168762	0.255245
		11.6605	-0.0933113	0.110226	0.0924377	-0.0137901	-0.0199966	0.0820084	0.190453	-0.19445	-0.286873	0.12236		11.6605	0.658543	0.362785	0.099617	0.161308	0.250069	0.231918	0.0716286	0.377171	0.178726	0.359375
		11.6708	0.0619469	0.104454	0.0551147	-0.0051918	-0.0535927	0.190033	0.212101	-0.203865	-0.272808	0.193817		11.6708	0.5858	0.403938	0.0567627	0.153976	0.325531	0.240952	-0.0443039	0.326172	0.218025	0.422985
		11.681	0.113659	0.0383034	0.0266838	-0.110977	-0.0164223	0.283272	0.220352	-0.187954	-0.277706	0.131947		11.681	0.563416	0.328262	-0.0306778	0.240582	0.367302	0.222748	-0.0481758	0.258461	0.156708	0.318535
		11.6912	0.108559	-0.00299835	-0.0891876	-0.0744438	-0.0276184	0.365913	0.144306	-0.0874481	-0.334305	-0.00654221		11.6912	0.642365	0.366314	0.00484848	0.218025	0.372452	0.267262	-0.0639496	0.277763	0.125259	0.317924
		11.7015	0.032692	-0.0135269	-0.106258	-0.154682	0.0273361	0.334053	0.0965157	-0.10125	-0.352322	-0.029789		11.7015	0.684612	0.435535	0.0756912	0.289997	0.336853	0.216919	-0.148693	0.329559	0.194542	0.365383
		11.7117	0.0389252	0.0140343	-0.142166	-0.167545	-0.0165634	0.218323	0.141777	-0.154171	-0.140972	0.0724449		11.7117	0.755722	0.41732	0.166687	0.253448	0.244698	0.219551	-0.150314	0.258179	0.251633	0.368866
		11.722	0.0127831	0.0750694	-0.106186	-0.178585	-0.0597801	0.153271	0.148445	-0.203011	-0.0837021	0.113277		11.722	0.741642	0.29026	0.149498	0.198109	0.173683	0.218613	-0.118511	0.258667	0.298733	0.337357
		11.7322	0.00114822	0.086586	0.0676422	-0.173958	-0.0651321	0.0973358	0.0979004	-0.19426	-0.0910225	0.0537453		11.7322	0.740067	0.292522	0.129135	0.150414	0.148281	0.205666	-0.0323105	0.384491	0.225563	0.277481
		11.7424	-0.00917435	0.1581	0.0747719	-0.168476	0.0117569	0.0170517	0.162296	-0.269016	-0.146217	0.0244293		11.7424	0.622505	0.275105	0.130733	0.165302	0.141949	0.15815	0.0252304	0.327477	0.189537	0.293167
		11.7527	-0.0304565	0.121391	-0.0463829	-0.105652	-0.0462723	-0.0154457	0.186378	-0.327499	-0.149952	0.109272		11.7527	0.738853	0.326973	0.0980301	0.0806885	0.143402	0.145992	-0.00954437	0.289909	0.178009	0.245064
		11.7629	-0.0063858	0.0417023	-0.093338	-0.0891533	-0.0171623	-0.105843	0.118332	-0.312157	-0.128662	0.138916		11.7629	0.861401	0.313885	0.100189	0.0738945	0.132378	0.156395	0.0223961	0.292259	0.138752	0.196426
		11.7732	-0.0744667	-0.0614128	-0.154251	-0.0531998	-0.0520401	-0.0743828	0.148422	-0.301514	-0.0096283	0.203018		11.7732	0.797646	0.183449	0.0781631	0.0784721	0.127144	0.241119	0.0243492	0.184696	0.144249	0.208576
		11.7834	0.0106125	-0.169441	-0.0683746	-0.04562	-0.0633926	-0.0134888	0.159435	-0.258072	0.0287933	0.286068		11.7834	0.808819	0.217564	0.200996	0.0484085	0.186142	0.284904	-0.0681305	0.310715	0.208218	0.196163
		11.7936	0.00959015	-0.140533	-0.145763	-0.0333252	-0.0453644	0.0626373	0.163071	-0.264511	0.0100403	0.186615		11.7936	0.749382	0.249977	0.260384	0.102814	0.218735	0.187389	-0.076561	0.251022	0.230629	0.250141
		11.8039	0.0206985	-0.0962372	-0.247654	-0.0329208	-0.0271988	0.00715637	0.15567	-0.28183	-0.0507431	0.135864		11.8039	0.762051	0.241287	0.175659	0.0711365	0.292931	0.224075	-0.123707	0.134102	0.233166	0.265259
		11.8141	0.118332	-0.0634842	-0.194355	-0.018486	0.0350151	0.0862732	0.177292	-0.344666	0.0139999	0.155869		11.8141	0.70327	0.252541	0.0519104	0.126953	0.405067	0.213844	-0.160439	0.108917	0.290314	0.274475
		11.8244	0.115898	0.00650024	-0.157364	-0.0809135	0.041893	0.166302	0.241222	-0.362656	0.0289726	0.134197		11.8244	0.664227	0.212772	0.119106	0.116413	0.432961	0.153393	-0.107281	0.161449	0.427803	0.239643
		11.8346	0.0747604	0.0741043	-0.136673	-0.106487	-0.0118217	0.10754	0.334839	-0.414001	-0.00457382	0.127594		11.8346	0.748047	0.367981	0.0793533	0.122875	0.352676	0.174969	-0.0978546	0.170547	0.339279	0.256119
		11.8448	0.0741768	0.137962	-0.0957565	-0.155682	0.00740433	0.151543	0.279583	-0.347218	-0.0673866	0.149017		11.8448	0.754826	0.388489	0.0370178	0.037178	0.301403	0.234612	-0.107677	0.164803	0.303394	0.240906
		11.8551	0.072937	0.18784	-0.135441	-0.168701	0.128189	0.226265	0.176804	-0.361893	-0.100193	0.189034		11.8551	0.682182	0.324425	0.0742111	0.0539246	0.257645	0.245804	-0.0681	0.112637	0.253502	0.156147
		11.8653	0.0493431	0.21706	-0.0372124	-0.118717	0.110939	0.217323	0.169937	-0.320419	-0.0349846	0.0836525		11.8653	0.685852	0.26339	0.00575256	0.087101	0.256081	0.216228	0.0443039	0.118549	0.328716	0.153511
		11.8756	-0.0260696	0.145988	-0.118744	-0.167294	0.0725555	0.181404	0.264278	-0.367508	0.0443993	0.093235		11.8756	0.666061	0.287071	0.014267	0.064167	0.200184	0.242813	-0.119247	0.153275	0.341877	0.283283
		11.8858	-0.0159683	0.0736618	-0.144978	-0.203842	0.0543976	0.110355	0.211365	-0.289482	0.06464	0.178368		11.8858	0.759277	0.318878	0.0231438	-0.0143204	0.129875	0.32653	-0.190392	0.231449	0.345192	0.295704
		11.896	0.0506287	0.032074	-0.114532	-0.110161	0.0683136	0.0841904	0.194912	-0.204956	0.156143	0.166122		11.896	0.906223	0.331944	0.0226898	-0.0474777	0.110107	0.228817	-0.178497	0.236542	0.383156	0.179642
		11.9063	0.0113373	0.0611343	-0.0309906	0.0412369	0.0384216	0.141148	0.230541	-0.136871	0.119595	0.231041		11.9063	0.825554	0.338036	-0.0232162	-0.0456886	0.138218	0.0400391	-0.155457	0.209732	0.389297	0.192326
		11.9165	-0.0426941	-0.0377045	0.0105286	0.0127449	0.0108299	0.228085	0.29829	-0.287495	0.0252533	0.154644		11.9165	0.737232	0.362865	0.0370178	-0.0109482	0.253685	0.0325623	-0.209457	0.229687	0.386936	0.286991
		11.9268	-0.0617828	-0.108261	-0.0876541	-0.0320625	0.00942993	0.196232	0.30822	-0.382721	0.0263748	0.078064		11.9268	0.772873	0.394505	0.0535316	0.0767555	0.215977	0.155411	-0.243752	0.225647	0.258667	0.256721
		11.937	-0.00387192	-0.0266647	-0.0765266	-0.128075	0.0454254	0.285034	0.257092	-0.420349	0.0716972	0.172142		11.937	0.771294	0.311462	-0.0632362	0.0929756	0.0814056	0.207966	-0.22176	0.303001	0.307888	0.218327
		11.9472	0.0295677	-0.000175476	-0.0748253	-0.141472	0.0347061	0.272041	0.263744	-0.407967	0.108971	0.22884		11.9472	0.768787	0.350754	-0.0295563	0.108082	0.0904884	0.139362	-0.181549	0.226849	0.239365	0.202625
		11.9575	-0.0395241	-0.0651703	-0.0535202	-0.151676	0.138645	0.162971	0.191978	-0.313839	-0.0036087	0.236214		11.9575	0.804203	0.403351	-0.0464363	0.0450935	0.136322	0.125259	-0.097435	0.201759	0.27911	0.189789
		11.9677	-0.0977707	-0.111137	-0.0594711	-0.151192	0.183216	0.100998	0.159103	-0.326366	-0.00247574	0.298149		11.9677	0.871391	0.36351	0.00385666	0.0830574	0.138599	0.199741	-0.107853	0.126751	0.282082	0.131195
		11.978	-0.176346	-0.00731659	-0.0711861	-0.130341	0.23476	0.10157	0.195969	-0.340805	-0.00681305	0.255447		11.978	0.847824	0.24361	-0.00878143	0.116295	0.0487022	0.171215	-0.153702	0.0549393	0.365536	0.191849
		11.9882	-0.240574	-0.0252914	-0.0256271	-0.05233	0.243179	0.0635185	0.0677643	-0.355183	-0.0741806	0.262489		11.9882	0.785931	0.18948	-0.0946198	0.134533	0.0220604	0.0825806	-0.0923691	0.123447	0.322899	0.237434
		11.9984	-0.106808	0.122108	-0.110695	-0.0160408	0.232201	0.124508	0.156502	-0.317177	-0.105377	0.233711		11.9984	0.701492	0.140198	-0.0825081	0.126163	0.122795	0.133148	-0.106937	0.00435638	0.323669	0.278717
		12.0087	-0.0677528	0.12571	-0.089035	-0.0039444	0.22303	0.105659	0.137653	-0.260719	-0.108498	0.236778		12.0087	0.705593	0.134644	-0.0680847	-0.0102577	0.104458	0.285332	-0.156967	-0.0605011	0.286476	0.256187
		12.0189	-0.16452	0.21273	-0.155792	-0.125992	0.174538	0.150002	0.177303	-0.328671	-0.040741	0.199883		12.0189	0.600498	0.188606	0.0205116	-0.0208778	0.131115	0.115139	-0.16478	0.0177231	0.202259	0.18174
		12.0292	-0.19239	0.227646	-0.0631409	-0.204716	0.10611	0.124962	0.220551	-0.405918	-0.0639763	0.188976		12.0292	0.546127	0.284046	0.042614	0.0811768	0.20443	0.0312271	-0.213104	0.0929184	0.173363	0.228554
		12.0394	-0.299751	0.135696	-0.145992	-0.165283	0.156178	0.0974693	0.202789	-0.450287	-0.0550232	0.2458		12.0394	0.534576	0.226517	-0.0330353	0.105579	0.320286	0.0032959	-0.283901	0.133118	0.182945	0.215141
		12.0496	-0.303539	0.0820923	0.032486	-0.167904	0.250797	0.0918274	0.0728912	-0.473221	-0.0635719	0.312763		12.0496	0.537365	0.16748	-0.062027	0.0330391	0.266735	-0.000530243	-0.256546	0.156315	0.213367	0.118534
		12.0599	-0.269302	0.0838814	0.475113	-0.167461	0.161366	0.0627899	-0.0117264	-0.475441	-0.113617	0.309685		12.0599	0.557011	0.0747604	-0.036377	0.0260201	0.269192	-0.0309296	-0.335651	0.0704689	0.205193	0.113743
		12.0701	-0.268684	0.121059	0.408257	-0.195427	0.193935	0.0990677	0.0753326	-0.487526	-0.131355	0.14954		12.0701	0.543682	-0.00930405	-0.0917358	-0.020462	0.302238	-0.0611382	-0.319893	-0.00232697	0.16082	0.114647
		12.0804	-0.395855	0.108032	0.219574	-0.27005	0.157131	0.120193	0.109726	-0.506863	-0.18639	0.110664		12.0804	0.546295	-0.00930405	-0.10162	-0.00745392	0.207481	-0.067337	-0.266605	0.0870781	0.163204	0.11731
		12.0906	-0.369724	0.0469246	0.0740891	-0.23436	0.108368	0.08741	0.0657463	-0.532074	-0.13829	0.117569		12.0906	0.666946	-0.0309372	-0.0381317	0.0421944	0.0547714	-0.106209	-0.288303	-0.0491295	0.152103	0.143856
		12.1008	-0.342056	-0.0313148	-0.0423508	-0.231548	0.0489616	0.0335274	0.0436096	-0.473614	-0.157963	0.141182		12.1008	0.632614	-0.0031395	-0.0032959	0.0712967	0.0619011	-0.10778	-0.33025	-0.121529	0.0930138	0.123829
		12.1111	-0.179382	0.0246582	-0.0759544	-0.290115	0.00878906	-0.00751877	0.0422516	-0.50351	-0.231205	0.0802917		12.1111	0.558487	-0.0124626	0.0411911	-0.0200348	0.130875	-0.117569	-0.206512	-0.0319786	0.131783	0.0661697
		12.1213	-0.189014	-0.0352478	-0.0433388	-0.287209	0.0399246	-0.0471458	0.0798378	-0.525795	-0.299545	0.0484848		12.1213	0.555054	0.00162888	0.0427399	-0.0496292	0.197823	-0.106007	-0.115959	0.0183525	0.0947876	0.0444336
		12.1316	-0.184711	-0.0588379	-0.105686	-0.368008	0.0184593	0.0167999	0.0946426	-0.548897	-0.334236	0.0792885		12.1316	0.580875	0.129242	0.0115814	-0.0297852	0.202164	-0.124413	-0.171318	0.0521011	0.0700073	0.00704193
		12.1418	-0.194878	-0.161346	-0.194187	-0.368843	0.0632553	0.0791206	0.101627	-0.518318	-0.244923	0.11142		12.1418	0.652416	0.219101	-0.0874825	-0.0722961	0.104839	-0.109856	-0.317329	-0.0191612	0.137321	-0.0734863
		12.152	-0.176235	-0.166222	-0.219387	-0.357662	0.149693	0.0359344	0.160851	-0.441189	-0.276814	0.125534		12.152	0.65015	0.261253	-0.0804825	0.0411911	0.237808	-0.136906	-0.45821	0.0678253	0.225014	-0.0726852
		12.1623	-0.175663	-0.104782	-0.116383	-0.310551	0.163403	0.0314026	0.194008	-0.460087	-0.212711	0.0766335		12.1623	0.602905	0.203388	-0.00892258	0.0287704	0.255054	-0.149567	-0.324757	0.116653	0.18174	-0.162537
		12.1725	-0.252831	-0.184219	0.00297165	-0.270554	0.215473	0.0794449	0.215092	-0.593864	-0.142155	-0.0131454		12.1725	0.611958	0.167458	0.0262451	0.0575714	0.237305	-0.212925	-0.314648	0.0891876	0.111206	-0.180237
		12.1828	-0.264114	-0.184284	0.112301	-0.320454	0.262775	0.119556	0.207069	-0.612038	-0.109753	0.00546265		12.1828	0.536507	0.187916	-0.068943	0.0550461	0.199169	-0.229328	-0.218327	0.132641	0.0187721	-0.0943489
		12.193	-0.230988	-0.243874	0.0464478	-0.36491	0.328079	0.0589027	0.149216	-0.593647	-0.185619	-0.0431404		12.193	0.560684	0.148624	-0.184616	0.0473671	0.0936127	-0.213806	-0.29245	0.111897	0.0659065	0.0429573
		12.2032	-0.131004	-0.289379	0.0461235	-0.378616	0.32032	0.0214386	0.0801926	-0.518509	-0.201641	-0.0851746		12.2032	0.55204	0.0624733	-0.171406	0.0574913	-0.00151062	-0.298565	-0.34848	0.0890579	0.160702	0.141495
		12.2135	-0.155754	-0.237309	0.0589981	-0.28363	0.306072	-0.021347	-0.0103073	-0.489277	-0.201626	-0.0478821		12.2135	0.499519	0.0464287	-0.149265	0.039299	-0.00672913	-0.362053	-0.306576	0.0204163	0.165066	0.123352
		12.2237	-0.139877	-0.221222	0.060215	-0.241432	0.314217	-0.0428391	0.104263	-0.525127	-0.175091	0.0286942		12.2237	0.426014	0.159782	-0.143677	0.0213089	0.0855141	-0.22102	-0.315132	-0.0340271	0.245148	0.00733566
		12.234	-0.143227	-0.158783	0.0724373	-0.283203	0.285782	-0.0495872	0.20496	-0.473057	-0.2356	0.0725327		12.234	0.404018	0.153503	-0.0606918	0.0402298	0.169342	-0.0826759	-0.264351	-0.0107193	0.245651	-0.044529
		12.2442	-0.0924301	-0.0581589	0.00756073	-0.255463	0.23922	-0.0389442	0.25901	-0.48629	-0.206528	0.00320053		12.2442	0.388798	0.258335	-0.122028	0.0222855	0.182526	-0.156109	-0.2659	0.0468445	0.112732	-0.0994492
		12.2544	-0.0267944	-0.156826	-0.029583	-0.350986	0.165253	-0.00992584	0.223545	-0.527512	-0.212212	0.00225449		12.2544	0.426025	0.20639	-0.103123	-0.0818787	0.261658	-0.160877	-0.300701	0.0370445	0.115196	-0.245205
		12.2647	-0.155937	-0.198647	-0.0110474	-0.455421	0.0752106	-0.0115738	0.135834	-0.449715	-0.24688	0.0310326		12.2647	0.454254	0.143475	-0.188286	-0.00408173	0.264915	-0.181046	-0.375645	-0.0389404	0.100883	-0.273712
		12.2749	-0.217434	-0.128647	-0.040123	-0.30584	0.0619087	-0.090332	0.0831413	-0.463543	-0.281902	0.16526		12.2749	0.454277	0.170597	-0.172981	0.023922	0.204269	-0.185505	-0.450714	-0.0322189	0.131733	-0.270515
		12.2852	-0.191628	-0.0886993	-0.0236206	-0.182957	0.120716	-0.096283	-0.0712967	-0.450623	-0.151894	0.151733		12.2852	0.445694	0.202412	-0.192936	0.0479889	0.125736	-0.137215	-0.397148	-0.0250397	0.195152	-0.27639
		12.2954	-0.163002	-0.148029	-0.0198555	-0.196785	0.105862	-0.0337448	-0.119751	-0.503384	-0.199898	0.188904		12.2954	0.390633	0.192848	-0.198513	0.0425415	0.106377	-0.114735	-0.390522	0.0126686	0.163563	-0.235161
		12.3056	-0.189957	-0.188393	0.0475693	-0.216099	0.203648	-0.0173912	-0.095768	-0.544056	-0.218616	0.154106		12.3056	0.445492	0.0727348	-0.224964	0.0221558	0.12904	-0.11068	-0.30201	0.0498123	0.142021	-0.337868
		12.3159	-0.201569	-0.227089	-0.0089035	-0.204407	0.133064	-0.0675774	-0.055809	-0.580345	-0.201473	0.094635		12.3159	0.640984	0.0474052	-0.128059	0.0444107	0.0957565	-0.133484	-0.228554	0.0561905	0.118988	-0.377434
		12.3261	-0.193352	-0.276455	-0.0193214	-0.183865	0.0631256	-0.0375137	-0.124416	-0.662369	-0.318188	0.0455284		12.3261	0.664394	0.0744896	-0.149448	0.0497513	0.060997	-0.245983	-0.246277	0.00614548	0.153034	-0.272743
		12.3364	-0.288425	-0.267326	-0.0333977	-0.204548	0.0884933	0.0808754	-0.129734	-0.527225	-0.311195	-0.0586853		12.3364	0.659641	0.122849	-0.116379	0.0165291	0.0205688	-0.209656	-0.317795	-0.0667725	0.152462	-0.162926
		12.3466	-0.285	-0.232967	-0.0940666	-0.26606	0.0926781	0.133408	-0.104755	-0.527641	-0.203583	-0.0183296		12.3466	0.574295	0.148338	-0.158447	-0.065834	0.0616875	-0.218185	-0.369938	-0.164619	0.107567	-0.163189
		12.3568	-0.3759	-0.236927	-0.120125	-0.242123	0.0976715	0.0493813	0.00154114	-0.519867	-0.179955	0.000221252		12.3568	0.384766	0.158566	-0.143402	-0.0657005	0.0965652	-0.21693	-0.3745	-0.177773	0.0164108	-0.16021
		12.3671	-0.418755	-0.25016	-0.11364	-0.288578	0.107414	0.103153	0.068367	-0.526184	-0.184689	0.136284		12.3671	0.393719	0.16032	-0.109276	0.0400467	0.0922852	-0.182644	-0.456947	-0.0847893	0.00260544	-0.17654
		12.3773	-0.426048	-0.278946	-0.133438	-0.294792	0.0990219	0.194683	0.0330963	-0.535019	-0.191685	0.0943336		12.3773	0.39045	0.163738	-0.163498	0.0294762	0.0314636	-0.215797	-0.456993	-0.0389977	0.000102997	-0.0977097
		12.3876	-0.34272	-0.392303	-0.158733	-0.289352	0.0869331	0.0565186	0.0522766	-0.635715	-0.179428	0.0637093		12.3876	0.437634	0.147408	-0.29438	0.00967407	-0.0232773	-0.222977	-0.507942	-0.105637	0.0373688	-0.0789566
		12.3978	-0.278126	-0.301594	-0.0965462	-0.337833	0.115288	-0.135456	0.0797577	-0.580273	-0.17403	-0.0478706		12.3978	0.417622	0.214226	-0.181252	0.0306702	-0.0350647	-0.190861	-0.495823	-0.0824127	0.0708771	-0.140255
		12.408	-0.277561	-0.235195	-0.0639153	-0.407978	0.117935	-0.0837669	0.0118866	-0.531956	-0.24527	-0.143921		12.408	0.43251	0.164047	-0.194233	0.0849304	-0.0227127	-0.222855	-0.380081	-0.10318	0.0807114	-0.170746
		12.4183	-0.304874	-0.306221	-0.0615082	-0.513618	0.0996017	0.00528336	-0.034771	-0.561867	-0.241432	-0.134003		12.4183	0.434105	0.237782	-0.115219	0.173584	-0.0842247	-0.18428	-0.343433	-0.0966949	0.0922508	-0.0852165
		12.4285	-0.378891	-0.232384	-0.0919304	-0.389713	0.0855026	-0.0197372	0.00617981	-0.595936	-0.322765	-0.0909653		12.4285	0.336998	0.127182	-0.0656433	0.165112	-0.018158	-0.199253	-0.288502	0.0566406	0.0163879	-0.116165
		12.4388	-0.528618	-0.216454	-0.145493	-0.282711	0.140766	0.008255	-0.0473366	-0.646179	-0.3993	-0.0597191		12.4388	0.406368	0.0995255	-0.0812225	0.17136	0.0532227	-0.207596	-0.303585	0.0476532	0.00530243	-0.252373
		12.449	-0.456043	-0.229115	-0.219246	-0.252838	0.142841	0.124889	-0.0644875	-0.528606	-0.331245	-0.0812492		12.449	0.35693	0.0169449	-0.059803	0.204079	0.122231	-0.175446	-0.334293	0.0396652	0.0736313	-0.219315
		12.4592	-0.325951	-0.192436	-0.203201	-0.282677	0.14537	0.118675	-0.0979538	-0.485882	-0.271355	-0.0403137		12.4592	0.332302	-0.0207024	-0.137749	0.225838	0.140053	-0.137596	-0.345104	-0.0274239	0.116882	-0.256592
		12.4695	-0.237434	-0.128838	-0.254723	-0.33313	0.139656	0.101936	-0.0770531	-0.541912	-0.295292	-0.0193939		12.4695	0.295193	0.0482407	-0.157494	0.135765	0.116009	-0.0973854	-0.388557	-0.0320969	0.0813675	-0.254997
		12.4797	-0.209614	-0.23502	-0.320312	-0.39352	0.130882	0.143326	-0.0191422	-0.51157	-0.249882	0.0141296		12.4797	0.341469	0.100166	-0.254242	0.0650482	0.067646	-0.117508	-0.323303	-0.0860748	0.0965195	-0.227325
		12.49	-0.178204	-0.218124	-0.403221	-0.403805	0.167931	0.108902	-0.00352478	-0.60817	-0.172409	-0.0115356		12.49	0.410336	0.154457	-0.1875	0.00423813	0.124199	-0.105316	-0.411098	-0.0650101	0.0644302	-0.244205
		12.5002	-0.253426	-0.136635	-0.337608	-0.390564	0.180164	0.0980415	-0.08535	-0.73666	-0.144836	-0.0664902		12.5002	0.360401	0.189335	-0.155434	-0.0536346	0.0435905	-0.15691	-0.469082	-0.0408936	0.0593491	-0.266701
		12.5104	-0.251266	-0.0858879	-0.233288	-0.314804	0.211815	0.0965042	0.035408	-0.769421	-0.295456	-0.14846		12.5104	0.402794	0.187271	-0.150475	0.113995	-0.0235977	-0.278099	-0.434319	-0.0592308	0.0461044	-0.346882
		12.5207	-0.291412	-0.1222	-0.173767	-0.215931	0.179329	0.01754	0.0817566	-0.685783	-0.20076	-0.221142		12.5207	0.401848	0.0924187	-0.204998	0.0130577	-0.185028	-0.3591	-0.440342	-0.0636635	0.0487175	-0.226315
		12.5309	-0.314697	-0.12767	-0.0796432	-0.324738	0.210873	0.0746994	0.0668106	-0.676292	-0.221249	-0.198063		12.5309	0.41066	0.023159	-0.239235	-0.0324173	-0.220093	-0.324707	-0.402084	0.0460205	0.0137978	-0.245243
		12.5412	-0.317417	-0.128853	-0.117653	-0.313301	0.18145	0.0210114	0.0490112	-0.736843	-0.26363	-0.222511		12.5412	0.429504	-0.0368881	-0.143879	-0.0488586	-0.149933	-0.344055	-0.452488	0.0718307	0.117764	-0.299755
		12.5514	-0.2817	-0.0512772	-0.153107	-0.336262	0.221924	0.0366974	0.00876617	-0.686569	-0.284657	-0.241322		12.5514	0.481686	-0.0592384	-0.0224266	-0.0728073	-0.0798531	-0.291698	-0.540096	0.00337982	0.104755	-0.383812
		12.5616	-0.225418	-0.149498	-0.170822	-0.313492	0.165611	0.0293312	-0.0694351	-0.631912	-0.368557	-0.201759		12.5616	0.48283	0.0405502	0.0412064	-0.0329323	-0.0236435	-0.249569	-0.497501	-0.0517273	0.124352	-0.449425
		12.5719	-0.280533	-0.231037	-0.202927	-0.398224	0.163307	0.0330963	-0.0757294	-0.681396	-0.396652	-0.121326		12.5719	0.49015	0.219589	-0.0170059	0.0723534	-0.0244217	-0.167641	-0.404816	-0.0556641	0.0758247	-0.347607
		12.5821	-0.236328	-0.282951	-0.208183	-0.388561	0.141624	0.0658875	0.00273132	-0.72163	-0.382172	-0.160275		12.5821	0.412758	0.167603	-0.0928955	0.0568924	0.0216064	-0.144035	-0.358444	-0.12912	0.0998192	-0.427502
		12.5924	-0.228104	-0.21566	-0.179882	-0.357971	0.168877	0.0746536	0.0371742	-0.745934	-0.344833	-0.137207		12.5924	0.382893	0.158844	-0.130638	0.00151825	0.0513725	-0.10453	-0.410717	-0.106636	0.138897	-0.459297
		12.6026	-0.263947	-0.143856	-0.0808563	-0.30957	0.252907	0.0379868	0.0250854	-0.680386	-0.313828	-0.158318		12.6026	0.0219193	0.129715	-0.20903	0.0527573	0.0604324	-0.0864105	-0.439316	-0.0931435	0.0779076	-0.592129
		12.6128	-0.307808	-0.300308	-0.0718918	-0.332367	0.214962	0.0528946	0.0317612	-0.668797	-0.276634	-0.158508		12.6128	-0.168457	0.10535	-0.211327	0.116962	0.0849571	-0.0845833	-0.439873	-0.0119629	-0.0141525	-0.652996
		12.6231	-0.369804	-0.181908	-0.0761604	-0.308308	0.204399	-0.0464859	-0.0235176	-0.651608	-0.300201	-0.115356		12.6231	-0.0212822	0.141113	-0.219765	0.113312	0.117691	-0.107018	-0.428947	-0.0310478	-0.1017	-0.605541
		12.6333	-0.475677	-0.11451	-0.0804863	-0.301548	0.126534	0.0326195	-0.11694	-0.552711	-0.23967	-0.0467644		12.6333	0.141388	0.170834	-0.204697	0.140877	0.016983	-0.0625534	-0.39846	-0.0677643	-0.126511	-0.530354
		12.6436	-0.526104	-0.180134	-0.133724	-0.343937	0.160484	0.113358	-0.16404	-0.628578	-0.160095	-0.0475121		12.6436	0.192936	0.0604935	-0.12656	0.120155	-0.0677414	-0.18943	-0.364151	-0.0110092	-0.0790291	-0.442368
		12.6538	-0.426121	-0.157341	-0.0693169	-0.399597	0.140648	0.0385437	-0.136036	-0.700207	-0.211151	-0.0568008		12.6538	0.263161	-0.00117493	-0.0859337	0.132744	-0.0566063	-0.196678	-0.45797	-0.0113182	-0.193993	-0.412663
		12.664	-0.28392	-0.0858383	-0.0331039	-0.327408	0.145805	0.0876007	-0.109478	-0.663292	-0.19809	0.0111961		12.664	0.349316	0.0285072	-0.142654	0.0785904	-0.00289917	-0.152882	-0.389355	-0.00646973	-0.181	-0.453728
		12.6743	-0.346775	-0.133202	-0.0318375	-0.273453	0.104252	0.12701	-0.0681114	-0.631874	-0.24017	0.0806961		12.6743	0.392635	0.0148392	-0.169548	0.135002	0.0405502	-0.213711	-0.343433	0.0169373	-0.151497	-0.503166
		12.6845	-0.344883	-0.105137	-0.0580177	-0.362152	0.15799	0.144188	-0.0810585	-0.718864	-0.182003	0.135902		12.6845	0.426262	-0.0451164	-0.124153	0.157246	0.117485	-0.20295	-0.315586	0.0895348	-0.196915	-0.580128
		12.6948	-0.242897	0.015583	-0.0364151	-0.306854	0.134209	0.172024	-0.0498238	-0.816856	-0.17749	0.0695763		12.6948	0.499718	-0.0839386	-0.0831299	0.0616875	0.0747528	-0.176056	-0.275379	0.104866	-0.0833893	-0.561672
		12.705	-0.33046	0.0804939	0.0743446	-0.302063	0.141109	0.213516	-0.0404701	-0.864834	-0.243507	0.0949287		12.705	0.410599	-0.0517921	-0.0919266	0.0483589	0.0159912	-0.249607	-0.283699	0.147408	-0.00842285	-0.533752
		12.7152	-0.256954	0.039402	0.00734711	-0.287052	0.131897	0.136597	-0.0906677	-0.875362	-0.223488	0.00917053		12.7152	0.357563	-0.0181274	-0.105675	0.101074	0.0644531	-0.218613	-0.301701	0.133736	-0.00414276	-0.432434
		12.7255	-0.165043	-0.107262	-0.0344009	-0.154003	0.257805	0.0984497	-0.122559	-0.930222	-0.175423	-0.0949097		12.7255	0.290092	-0.00289917	-0.196342	0.112549	0.10062	-0.16684	-0.349205	0.0346985	-0.0533981	-0.45356
		12.7357	-0.304611	-0.105675	-0.0761948	-0.20079	0.325302	0.0998764	-0.0432434	-0.893509	-0.0932655	-0.0396576		12.7357	0.226006	0.030632	-0.209373	0.0982361	0.175209	-0.158566	-0.374611	-0.00576019	-0.0789566	-0.443665
		12.746	-0.377258	-0.188599	-0.116787	-0.219139	0.348717	0.130619	-0.0431862	-0.839874	-0.142902	0.0343475		12.746	0.292976	0.0710793	-0.21656	0.0533409	0.0908546	-0.149506	-0.33358	-0.0415878	-0.0322647	-0.353519
		12.7562	-0.413391	-0.258369	-0.12265	-0.240131	0.368252	0.0516548	0.057785	-0.832077	-0.185402	0.010994		12.7562	0.35247	0.108154	-0.0631866	0.0685272	0.0478096	-0.111061	-0.37952	0.0153618	0.0913315	-0.386032
		12.7664	-0.320312	-0.210842	-0.154503	-0.31385	0.348095	0.0490341	0.0566521	-0.760445	-0.214802	-0.0921211		12.7664	0.407452	0.0286407	-0.0598106	0.046093	-0.0263367	-0.0371628	-0.404778	-0.019043	0.0255508	-0.326473
		12.7767	-0.335583	-0.226421	-0.136322	-0.253162	0.269226	0.0474854	0.044281	-0.693546	-0.230022	-0.0642242		12.7767	0.273365	0.0486298	-0.0443993	0.01828	-0.00440216	-0.0166245	-0.371464	0.0479622	0.0074234	-0.349274
		12.7869	-0.377697	-0.321289	-0.0379753	-0.184902	0.186935	0.0846291	0.0498199	-0.664299	-0.144325	-0.072155		12.7869	0.196228	0.012619	-0.0732117	0.0303574	0.0202827	-0.0528183	-0.376518	0.0853386	0.119503	-0.425785
		12.7972	-0.375694	-0.353928	-0.0471191	-0.20562	0.145702	0.0429535	0.0237503	-0.714371	-0.131546	-0.0715942		12.7972	0.227062	-0.0106392	-0.14859	-0.0402031	0.0563545	-0.111588	-0.496212	0.133976	0.0708275	-0.490395
		12.8074	-0.337379	-0.363861	-0.0297737	-0.16428	0.130394	0.0987434	0.0397835	-0.685726	-0.162254	-0.00255966		12.8074	0.28344	0.0165405	-0.0753326	-0.129356	0.071209	-0.165852	-0.548523	0.152287	0.0654869	-0.477608
		12.8176	-0.274345	-0.356071	-0.053997	-0.145397	0.12075	0.169067	0.0147705	-0.732681	-0.121841	0.0888252		12.8176	0.22002	-0.0880394	-0.0618515	-0.149281	0.0937042	-0.239738	-0.527176	0.159615	0.0214157	-0.50346
		12.8279	-0.234123	-0.310558	0.0457077	-0.184189	0.0137863	0.157124	0.0231171	-0.722382	-0.144714	0.199562		12.8279	0.264103	-0.0863152	-0.0834541	-0.122005	0.0443153	-0.218933	-0.551933	0.142735	0.0769081	-0.450569
		12.8381	-0.20718	-0.303707	0.0535049	-0.277489	-0.0554276	0.0857391	-0.00604248	-0.654861	-0.155388	0.118259		12.8381	0.289932	-0.026432	-0.139252	-0.0494766	0.0859909	-0.176746	-0.543552	0.0737114	0.011055	-0.401505
		12.8484	-0.279041	-0.259491	-0.0655823	-0.286137	0.00791931	-0.0209503	-0.023468	-0.768944	-0.178036	0.0445404		12.8484	0.23423	0.0856705	-0.0844307	-0.0687294	0.00947189	-0.141079	-0.466984	0.0515785	0.0182953	-0.395782
		12.8586	-0.270863	-0.173553	-0.0878906	-0.280701	0.10289	0.0111961	0.0352173	-0.800865	-0.191635	0.0747833		12.8586	0.287716	0.0507202	-0.0140343	-0.0185776	0.0152664	-0.242344	-0.490562	0.0194855	-0.0349121	-0.439697
		12.8688	-0.308487	-0.151573	-0.0325317	-0.40134	0.212292	0.0357285	0.0599213	-0.83252	-0.152382	0.0219269		12.8688	0.344555	0.0186844	-0.0355644	0.0197983	0.0109024	-0.16082	-0.452168	-0.0699692	-0.0967674	-0.451939
		12.8791	-0.430473	-0.216183	0.0125084	-0.373779	0.227028	0.0925827	0.122322	-0.829048	-0.145527	9.91821e-05		12.8791	0.348778	0.0355911	-0.137314	0.0158615	-0.0798759	-0.141182	-0.506489	-0.0512047	-0.0609474	-0.470821
		12.8893	-0.490112	-0.296028	-0.0159111	-0.241219	0.248329	0.033371	0.136261	-0.854286	-0.162262	0.000896454		12.8893	0.31665	0.147327	-0.175541	0.079483	-0.0937386	-0.171764	-0.566704	-0.0516815	-0.0623169	-0.537292
		12.8996	-0.44989	-0.28624	-0.103363	-0.240822	0.336899	0.0377464	0.095253	-0.869579	-0.136574	0.000862122		12.8996	0.265114	0.222858	-0.127464	0.06353	-0.0813904	-0.149456	-0.691208	0.0261841	-0.0231667	-0.510281
		12.9098	-0.419815	-0.249596	-0.0794525	-0.280231	0.285904	0.0630417	0.0300941	-0.912674	-0.187454	-0.111565		12.9098	0.200909	0.210197	-0.0347672	0.131672	-0.0657387	-0.192818	-0.597851	0.0310974	-0.00249481	-0.509819
		12.92	-0.418221	-0.241241	-0.0501709	-0.210922	0.180092	0.117355	0.0546722	-0.775787	-0.188431	-0.0628586		12.92	0.0678482	0.152081	-0.13768	0.0629272	-0.0262794	-0.249702	-0.544815	0.0303917	-0.0317383	-0.49184
		12.9303	-0.413879	-0.161968	-0.116192	-0.206562	0.138096	0.111752	0.0207329	-0.8172	-0.231918	0.00236511		12.9303	0.0450668	0.13105	-0.281944	0.00603867	-0.00666046	-0.126949	-0.572258	0.0148621	0.00378418	-0.595585
		12.9405	-0.326675	-0.204201	-0.183315	-0.178474	0.117878	0.0817566	0.0223541	-0.819176	-0.258812	0.122536		12.9405	0.160545	0.132473	-0.272663	-0.0491066	-0.0108299	-0.186497	-0.552376	0.00346375	-0.00572968	-0.624722
		12.9508	-0.161522	-0.191971	-0.0963058	-0.381813	0.0614777	0.0665474	0.0929184	-0.846298	-0.2061	-0.0508652		12.9508	0.11882	0.0918579	-0.15873	-0.0444336	-0.00124741	-0.258247	-0.624451	-0.00675201	-0.0780487	-0.567467
		12.961	-0.212395	-0.212776	-0.0238113	-0.736889	0.0858688	0.125507	0.0552788	-0.882587	-0.211441	-0.130997		12.961	0.0895081	0.127491	-0.103718	-0.0456161	-0.0671768	-0.326141	-0.567966	-0.051445	0.0308609	-0.580303
		12.9712	-0.167725	-0.299854	-0.108788	-0.622902	0.0624084	0.120106	0.0337257	-0.845333	-0.139351	-0.175293		12.9712	0.0415497	0.0275688	-0.129047	-0.0461426	-0.00544357	-0.302059	-0.512894	-0.0369377	-0.0525398	-0.639359
		12.9815	-0.153458	-0.352306	-0.194378	-0.349842	-0.0460014	-0.00399017	0.0538864	-0.831123	-0.0805473	-0.0981293		12.9815	-0.000770569	-0.122158	-0.136024	-0.0522194	0.0122223	-0.300163	-0.400528	-0.0829277	-0.0563927	-0.661213
		12.9917	-0.129601	-0.311489	-0.163494	-0.162144	0.00287628	-0.0317039	0.0342903	-0.808304	-0.129265	-0.140114		12.9917	0.0843353	-0.197105	-0.123482	0.00173187	-0.0162659	-0.293198	-0.417629	-0.0367317	-0.0988884	-0.670155
		13.002	-0.143204	-0.235283	-0.0498962	-0.0901566	-0.0561829	0.0198975	0.0807648	-0.808987	-0.160606	-0.23658		13.002	0.118454	-0.229279	-0.111691	0.0325508	-0.0655479	-0.221172	-0.347988	-0.141445	-0.059063	-0.596912
		13.0122	-0.166889	-0.264687	-0.0500298	-0.144085	-0.11787	0.135864	0.0319138	-0.826019	-0.259369	-0.186058		13.0122	0.184887	-0.285759	-0.149887	-0.0821991	-0.0598488	-0.217621	-0.290218	-0.132664	0.00969696	-0.586357
		13.0224	-0.0967445	-0.292763	0.0260391	-0.214802	-0.171432	0.169815	0.110725	-0.79126	-0.265846	-0.158676		13.0224	0.133057	-0.249084	-0.196617	-0.101025	-0.129074	-0.240593	-0.402435	-0.224941	-0.0186119	-0.678986
		13.0327	0.0496292	-0.218258	0.168884	-0.225746	-0.102585	0.125053	0.0949783	-0.754662	-0.33812	-0.132568		13.0327	0.171272	-0.303062	-0.175087	-0.0310974	0.0161819	-0.270706	-0.470108	-0.175159	-0.117596	-0.593525
		13.0429	0.0559235	-0.140259	0.278725	-0.173435	0.00909805	0.179996	0.0472946	-0.890289	-0.326866	-0.12986		13.0429	0.176758	-0.386826	-0.250141	0.0321312	0.0790443	-0.343506	-0.500782	-0.136452	-0.150887	-0.551361
		13.0532	0.0928192	-0.0867538	0.411324	-0.0218124	0.0766792	0.131096	0.126198	-0.963612	-0.307404	-0.024662		13.0532	0.248226	-0.330215	-0.216309	0.0170555	0.0215454	-0.376671	-0.396721	0.00956726	-0.0924187	-0.580078
		13.0634	0.187866	0.0317001	0.309647	0.0131035	0.166824	0.129593	0.1511	-0.948391	-0.265347	-0.0460243		13.0634	0.241272	-0.191505	-0.233154	-0.031765	0.070343	-0.386292	-0.370255	-0.0950394	-0.106365	-0.52095
		13.0736	0.216309	0.00450897	0.307503	-0.0720367	0.279312	0.193123	0.143745	-0.858589	-0.30069	-0.0527344		13.0736	0.196354	-0.148376	-0.306278	-0.124115	0.00256729	-0.442806	-0.544231	-0.139935	-0.129013	-0.44965
		13.0839	0.184158	0.0762367	0.375259	0.00717926	0.270809	0.204552	0.0904465	-0.744957	-0.352474	-0.146576		13.0839	0.162491	-0.197952	-0.23275	-0.123135	-0.108974	-0.483696	-0.623505	-0.102943	-0.141056	-0.430862
		13.0941	0.180725	-0.0131798	0.376873	0.0100517	0.21196	0.179867	0.138668	-0.742802	-0.311359	-0.152931		13.0941	0.132004	-0.262802	-0.244934	-0.0976715	-0.0519447	-0.403374	-0.559464	-0.159531	-0.096447	-0.456276
		13.1044	0.150982	-0.0287857	0.417931	0.017704	0.304871	0.150383	0.146538	-0.692116	-0.232349	-0.123306		13.1044	0.0482025	-0.22773	-0.146778	-0.0252533	-0.0187683	-0.260429	-0.49955	-0.182518	-0.0974808	-0.428001
		13.1146	0.101437	-0.0391693	0.317253	0.150837	0.395718	0.220829	0.15873	-0.621422	-0.209351	-0.120125		13.1146	0.128788	-0.11993	-0.140625	-0.00357056	-0.0296173	-0.241486	-0.554504	-0.243027	-0.0765724	-0.441902
		13.1248	0.0841751	-0.0344696	0.254265	0.232044	0.442497	0.190273	0.250084	-0.569435	-0.216145	-0.119244		13.1248	0.175613	0.0166245	-0.187096	0.00930786	-0.0568314	-0.277725	-0.526657	-0.24398	-0.132648	-0.332539
		13.1351	0.0397491	-0.105701	0.244896	0.22477	0.408272	0.291828	0.351227	-0.554272	-0.185555	-0.0834579		13.1351	0.183159	0.0478821	-0.121468	0.0349197	-0.0487251	-0.311558	-0.59959	-0.107712	-0.095089	-0.378315
		13.1453	0.0563431	-0.0385971	0.111633	0.222816	0.413288	0.346436	0.339035	-0.608513	-0.0103416	-0.00205994		13.1453	0.192005	0.015934	-0.191433	0.0705566	-0.0134621	-0.252644	-0.544815	-0.0746155	-0.100365	-0.407139
		13.1556	0.0511208	0.0306396	0.0030098	0.298634	0.451031	0.338844	0.338345	-0.671547	0.0551262	-0.0249825		13.1556	0.121159	0.00348663	-0.254791	0.0962677	-0.0229759	-0.279984	-0.528687	-0.0747757	-0.117287	-0.641544
		13.1658	0.0522423	-0.0531044	0.128475	0.280586	0.409489	0.356163	0.36005	-0.591408	0.0539589	-0.0216904		13.1658	0.113567	0.00897217	-0.315933	-0.00675201	-0.043663	-0.35104	-0.505955	-0.139133	-0.181381	-0.63142
		13.176	0.0466614	-0.0234795	0.272644	0.187576	0.427776	0.320915	0.343216	-0.513309	-0.0596008	0.0824585		13.176	0.0853615	0.0151329	-0.332027	-0.0591927	-0.0329437	-0.29084	-0.537212	-0.142044	-0.223785	-0.56184
		13.1863	0.0503197	0.0402031	0.287308	0.269657	0.347008	0.433426	0.28196	-0.453457	-0.0974045	0.0473061		13.1863	0.0668831	0.0196991	-0.353828	-0.172226	-0.0482254	-0.337044	-0.503475	-0.0975418	-0.212898	-0.458447
		13.1965	0.0338593	0.0887222	0.25528	0.392395	0.294071	0.478329	0.268967	-0.432129	-0.085968	0.0623283		13.1965	0.0600662	0.0351257	-0.301727	-0.218597	0.00378418	-0.348274	-0.477417	-0.138992	-0.207726	-0.495964
		13.2068	-0.0126305	0.0684776	0.25288	0.393547	0.358158	0.487534	0.183025	-0.40538	-0.0216904	0.104862		13.2068	0.0207825	-0.0264473	-0.205189	-0.159103	0.0624733	-0.378853	-0.580795	-0.104897	-0.159248	-0.573769
		13.217	-0.10017	-0.0259018	0.24704	0.388294	0.359444	0.421745	0.157181	-0.434528	0.146706	0.142746		13.217	-0.0887566	-0.189796	-0.269165	-0.0267105	0.143307	-0.416168	-0.566261	-0.0580597	-0.0582771	-0.607449
		13.2272	0.0300064	-0.0787354	0.229412	0.413063	0.412453	0.405052	0.186569	-0.416454	0.155106	0.188309		13.2272	-0.0816422	-0.200729	-0.306194	-0.0196838	0.189442	-0.407272	-0.545708	-0.263874	-0.0581665	-0.687759
		13.2375	-0.0202866	-0.159439	0.286713	0.363594	0.425869	0.473442	0.296524	-0.333733	0.175705	0.170578		13.2375	-0.0225716	-0.220665	-0.295837	-0.125271	0.185699	-0.372952	-0.574581	-0.306686	-0.106533	-0.685486
		13.2477	-0.0826073	-0.189873	0.293221	0.360111	0.410213	0.470726	0.209431	-0.280769	0.132385	0.176388		13.2477	0.0526962	-0.21817	-0.281578	-0.218399	0.0874214	-0.329868	-0.555126	-0.149376	-0.0825233	-0.68087
		13.258	-0.0980721	-0.252804	0.190868	0.391609	0.455338	0.440601	0.25528	-0.327309	0.123299	0.189571		13.258	0.043148	-0.23597	-0.159821	-0.207512	0.0444336	-0.329956	-0.541695	-0.104267	-0.0743942	-0.632912
		13.2682	-0.035305	-0.321396	0.0820312	0.479881	0.467903	0.510826	0.312428	-0.332581	0.110401	0.222618		13.2682	0.0222397	-0.196186	-0.0788841	-0.147907	0.0187569	-0.295715	-0.58313	-0.124485	-0.114662	-0.545078
		13.2784	0.036911	-0.253506	0.0236549	0.479057	0.377838	0.488094	0.320847	-0.337761	0.0368156	0.248566		13.2784	-0.0126648	-0.150925	-0.138752	-0.184669	0.00933075	-0.293739	-0.590092	-0.194675	-0.144012	-0.401241
		13.2887	0.0528641	-0.203175	0.0382233	0.402725	0.248039	0.549774	0.265232	-0.402508	0.0282822	0.156216		13.2887	-0.00556183	-0.159492	-0.210697	-0.120323	0.102074	-0.271614	-0.489109	-0.280777	-0.127594	-0.45475
		13.2989	-0.0167694	-0.228607	0.0919876	0.270657	0.256973	0.530464	0.281799	-0.552475	0.0844994	0.123528		13.2989	0.0498238	-0.144997	-0.172012	-0.18409	0.0937157	-0.252708	-0.487667	-0.322166	-0.0978165	-0.508919
		13.3092	-0.0892105	-0.291031	0.101509	0.375191	0.256115	0.437336	0.336769	-0.508366	0.0964432	0.255016		13.3092	0.0653343	-0.078743	-0.0770721	-0.214806	0.0740585	-0.287468	-0.52964	-0.258965	-0.0889854	-0.593143
		13.3194	-0.152	-0.289856	0.115852	0.519886	0.251663	0.43755	0.26416	-0.485321	0.178112	0.212494		13.3194	0.0830498	-0.0381393	-0.0723763	-0.255196	0.0626984	-0.267689	-0.558083	-0.151627	-0.0840492	-0.595848
		13.3296	-0.139053	-0.280247	0.168591	0.546413	0.191574	0.32119	0.180916	-0.322983	0.18454	0.21209		13.3296	0.000232697	0.0641403	-0.0590019	-0.152962	0.0812607	-0.294296	-0.601093	-0.154369	-0.0789337	-0.524719
		13.3399	-0.113434	-0.306091	0.144989	0.535042	0.284103	0.286163	0.209145	-0.223907	0.127441	0.294189		13.3399	0.0760155	0.0616226	-0.0836296	-0.225204	0.11116	-0.246326	-0.607567	-0.123421	-0.0816498	-0.49128
		13.3501	-0.10664	-0.364681	0.0986137	0.510269	0.235489	0.180355	0.198227	-0.188217	0.147682	0.312889		13.3501	0.0625305	0.0154915	-0.0937042	-0.27887	0.158161	-0.305851	-0.643795	-0.0901527	-0.143631	-0.513092
		13.3604	-0.184166	-0.432503	0.0435867	0.517456	0.270657	0.11628	0.126854	-0.228317	0.174789	0.260643		13.3604	0.0378189	-0.0285225	-0.165825	-0.290401	0.152309	-0.288231	-0.557121	-0.0787201	-0.138863	-0.567524
		13.3706	-0.333057	-0.431618	0.0281715	0.49353	0.25293	0.0439301	0.166088	-0.275719	0.126297	0.218513		13.3706	0.0835114	0.0520554	-0.230114	-0.261456	0.0162926	-0.264748	-0.529949	-0.0921631	-0.193722	-0.544994
		13.3808	-0.222057	-0.38372	0.0654831	0.414997	0.282589	0.0983772	0.305954	-0.33905	0.00151825	0.240547		13.3808	0.212425	0.12928	-0.235146	-0.192848	-0.00577545	-0.262516	-0.616402	-0.0990677	-0.143661	-0.525337
		13.3911	-0.229855	-0.399586	0.0204849	0.410904	0.231354	0.178486	0.299004	-0.276703	-0.0259476	0.234306		13.3911	0.221031	0.132889	-0.2379	-0.084671	-0.0346489	-0.28793	-0.66758	-0.0558205	-0.164635	-0.519409
		13.4013	-0.281281	-0.476871	-0.105827	0.394073	0.107033	0.243271	0.29501	-0.292622	-0.0546799	0.23587		13.4013	0.104721	-0.0158691	-0.18882	-0.0167427	-0.116833	-0.380772	-0.596745	-0.0948715	-0.153008	-0.480968
		13.4116	-0.273224	-0.393101	-0.151287	0.379745	0.100761	0.183731	0.144279	-0.351685	-0.0684586	0.0926781		13.4116	0.108582	0.178925	-0.143227	0.0046196	-0.118774	-0.305801	-0.579365	-0.146309	-0.097187	-0.443893
		13.4218	-0.277897	-0.454922	-0.110802	0.348763	-0.000972748	0.16531	0.055088	-0.397118	-0.108116	0.0736389		13.4218	0.0457001	0.526962	-0.125187	0.0767059	-0.0425644	-0.242439	-0.510399	-0.290386	-0.102371	-0.423378
		13.432	-0.233528	-0.423084	-0.120434	0.396687	-0.0531387	0.102764	-0.0251732	-0.343628	-0.117527	0.157791		13.432	0.0467949	0.385971	-0.131828	0.0173035	-0.0620651	-0.229256	-0.514191	-0.313679	-0.0738525	-0.52367
		13.4423	-0.219379	-0.45528	-0.137634	0.386932	-0.0854568	0.0424652	0.0050354	-0.296127	-0.119671	0.131241		13.4423	0.0455933	0.145809	-0.207798	0.00526428	-0.0979118	-0.198692	-0.555405	-0.270454	-0.120647	-0.586349
		13.4525	-0.192184	-0.453205	-0.0854683	0.34993	-0.0490875	0.0159416	-0.0249023	-0.270805	-0.125118	0.111919		13.4525	0.144871	-0.0184135	-0.187103	-0.0494537	-0.0940399	-0.143471	-0.4944	-0.294693	-0.0759201	-0.562302
		13.4628	-0.202068	-0.458252	-0.0841713	0.370316	0.000793457	-0.0109634	-0.0476303	-0.297962	-0.112194	0.0844994		13.4628	0.199646	-0.0552597	-0.137669	-0.0561867	0.0125237	-0.181572	-0.463875	-0.260609	-0.0404434	-0.513809
		13.473	-0.244629	-0.448959	-0.0415039	0.348572	0.0448761	-0.0657501	-0.145065	-0.391613	-0.12394	0.168091		13.473	0.174992	-0.0876579	-0.161236	-0.0838089	0.0596924	-0.215355	-0.479736	-0.203781	-0.0885887	-0.496048
		13.4832	-0.330196	-0.447411	-0.052269	0.300293	0.0643616	-0.0661469	-0.103127	-0.445526	-0.177822	0.144318		13.4832	0.134842	-0.0461159	-0.233116	-0.100071	0.135406	-0.199467	-0.432213	-0.160439	-0.00761414	-0.578003
		13.4935	-0.326096	-0.467342	0.0126877	0.330868	0.0141678	0.0472603	-0.137489	-0.439495	-0.205654	0.0509796		13.4935	0.0891533	-0.0174332	-0.323837	-0.178043	0.104446	-0.217789	-0.446026	-0.120682	0.0729256	-0.726467
		13.5037	-0.321899	-0.388607	0.0354424	0.286903	0.0469017	0.0532188	-0.139614	-0.408501	-0.170654	0.0203667		13.5037	0.134262	-0.05756	-0.331696	-0.131645	0.0724869	-0.216206	-0.419121	-0.153439	0.10714	-0.678604
		13.514	-0.261276	-0.412937	-0.0219688	0.236755	0.12384	0.0336685	-0.15387	-0.388702	-0.15797	-0.0245667		13.514	0.133331	-0.100857	-0.267082	0.0243378	0.0434113	-0.221199	-0.4193	-0.133427	0.00421143	-0.653187
		13.5242	-0.228043	-0.437508	-0.0194016	0.213448	0.0501556	-0.038475	0.08992	-0.424084	-0.24427	0.032383		13.5242	0.0945511	-0.0228462	-0.233299	0.0241203	-0.0303345	-0.255543	-0.456841	-0.171608	-0.0741806	-0.604301
		13.5344	-0.211723	-0.395691	-0.0143242	0.323753	-0.0483704	-0.0747147	0.131447	-0.385471	-0.321957	0.0496216		13.5344	0.0320282	0.0489426	-0.299007	-0.0185089	-0.0231667	-0.330872	-0.514778	-0.116165	-0.138622	-0.555355
		13.5447	-0.25193	-0.418171	-0.0521774	0.389473	-0.0541306	-0.0998459	0.195278	-0.393242	-0.27718	-0.0309563		13.5447	0.0276413	0.041214	-0.313919	-0.103107	-0.130066	-0.304634	-0.533752	-0.0406342	-0.16201	-0.543579
		13.5549	-0.235504	-0.307674	-0.0629616	0.32106	-0.0657272	-0.108013	0.158657	-0.344654	-0.322613	0.0162964		13.5549	0.101814	-0.00628662	-0.283829	-0.189056	-0.10434	-0.14661	-0.502792	-0.141113	-0.16357	-0.541313
		13.5652	-0.205368	-0.40509	-0.106628	0.318066	-0.0136566	-0.0445213	0.128368	-0.371704	-0.224648	0.00126648		13.5652	0.0919762	0.059433	-0.238876	-0.236015	-0.0288773	-0.0167923	-0.462467	-0.14909	-0.094883	-0.488167
		13.5754	-0.185356	-0.459396	-0.20517	0.345974	0.00287628	-0.0308952	0.134567	-0.400742	-0.338432	-0.0558929		13.5754	0.10844	0.188679	-0.245815	-0.198704	0.001297	-0.000244141	-0.355045	-0.251335	-0.0783043	-0.465885
		13.5856	-0.15324	-0.411507	-0.153576	0.357967	-0.0609818	-0.099144	0.0287437	-0.482506	-0.344406	-0.194557		13.5856	0.0932999	0.180286	-0.251846	-0.156696	0.0342789	-0.0230637	-0.360855	-0.226456	-0.0479622	-0.433224
		13.5959	-0.0813828	-0.388496	-0.125893	0.379101	0.00421143	-0.126118	-0.0149117	-0.516171	-0.335571	-0.164574		13.5959	0.129421	0.189034	-0.264984	-0.0646744	0.11824	-0.127068	-0.385586	-0.143307	-0.0161591	-0.368576
		13.6061	-0.0819397	-0.268372	-0.0391083	0.458076	-0.00463486	-0.0329132	-0.0564194	-0.438007	-0.389751	-0.139748		13.6061	0.153107	0.153011	-0.169914	-0.0634613	0.0341263	-0.163418	-0.297516	-0.164589	-0.0224648	-0.329464
		13.6164	-0.0413971	-0.263351	-0.000843048	0.525681	0.00323486	-0.0783882	-0.0161133	-0.433418	-0.394409	-0.115532		13.6164	0.163956	0.102909	-0.236145	-0.0551872	0.104149	-0.150139	-0.329956	-0.14003	-0.0380821	-0.29493
		13.6266	-0.0117493	-0.239582	-0.0132027	0.461918	-0.0126305	-0.16478	-0.00876999	-0.491222	-0.367111	-0.205933		13.6266	0.252811	0.0439835	-0.200954	-0.0642624	0.14418	-0.137775	-0.328712	-0.103481	0.0497169	-0.240665
		13.6368	-0.0320854	-0.167725	-0.0644379	0.395287	0.0523949	-0.136673	0.0330124	-0.45647	-0.27412	-0.229305		13.6368	0.324875	0.0492744	-0.13327	-0.115814	0.0989532	-0.142685	-0.409634	-0.138268	0.147003	-0.224979
		13.6471	0.00917053	-0.229759	-0.0692787	0.437096	0.015049	-0.148029	0.064045	-0.475235	-0.293549	-0.230705		13.6471	0.278244	0.0256004	-0.0732269	-0.070507	0.0540199	-0.0897942	-0.375374	-0.214928	0.0811653	-0.218597
		13.6573	0.00375748	-0.250755	-0.0327072	0.438393	0.0756073	-0.140923	0.0522194	-0.527687	-0.321205	-0.215279		13.6573	0.29451	-0.000125885	-0.0925217	-0.0732117	0.072258	-0.000198364	-0.35804	-0.305023	0.0196533	-0.300175
		13.6676	-0.0331841	-0.180286	-0.128456	0.548878	-0.0359154	-0.127239	-0.0861015	-0.516888	-0.300415	-0.227089		13.6676	0.252304	-0.0486908	-0.142353	-0.0840988	0.00473022	-0.0573959	-0.377552	-0.344055	-0.0493927	-0.32037
		13.6778	-0.0841827	-0.121696	-0.165791	0.561466	-0.0467377	-0.0962906	-0.100609	-0.591003	-0.344929	-0.2061		13.6778	0.223488	-0.0303421	-0.268108	-0.121944	-0.0603828	-0.0346336	-0.352676	-0.377934	-0.0228233	-0.461491
		13.688	-0.00806808	-0.192112	-0.0425911	0.610344	-0.0378227	-0.0362587	0.0716476	-0.656567	-0.418434	-0.196632		13.688	0.149807	0.0578575	-0.268372	-0.115593	-0.0341721	-0.0501213	-0.361187	-0.36599	0.0138359	-0.456245
		13.6983	0.154079	-0.235958	0.0308189	0.633492	-0.0686493	-0.0428162	0.0977402	-0.535103	-0.479733	-0.156055		13.6983	0.175865	0.176056	-0.178856	-0.16156	0.0280228	0.017662	-0.32262	-0.325378	0.0226822	-0.418884
		13.7085	0.172581	-0.27618	0.0978127	0.626747	-0.0689697	-0.0450706	0.00927734	-0.507912	-0.51342	-0.167793		13.7085	0.15834	0.20879	-0.144974	-0.190647	0.0839653	-0.0324402	-0.342735	-0.250061	0.033886	-0.313347
		13.7188	0.0681686	-0.227795	0.144989	0.555401	-0.00358582	-0.0230484	0.0738068	-0.536606	-0.430283	-0.194618		13.7188	0.230942	0.143013	-0.212162	-0.225395	0.121231	-0.170773	-0.347214	-0.257507	-0.0618134	-0.338181
		13.729	0.0279007	-0.174389	0.110916	0.447098	-0.0321121	-0.0190811	0.187737	-0.524628	-0.379429	-0.107761		13.729	0.33947	0.0848389	-0.212971	-0.285858	0.0588341	-0.190407	-0.31398	-0.292332	-0.0221176	-0.457279
		13.7392	0.0291405	-0.169201	0.0819473	0.344101	0.0113525	-0.0501823	0.2062	-0.556217	-0.335213	-0.0516968		13.7392	0.339252	0.0691986	-0.144165	-0.210938	0.0267677	-0.216621	-0.277657	-0.286835	-0.027401	-0.363987
		13.7495	-0.0386429	-0.281593	0.0528259	0.394119	-0.0555382	-0.0125122	0.143734	-0.566135	-0.286945	-0.133118		13.7495	0.326736	-0.0284042	-0.125832	-0.227673	0.0311699	-0.241074	-0.389748	-0.246483	-0.0768356	-0.361435
		13.7597	0.0354347	-0.256748	0.0719681	0.442616	0.0267868	-0.0252571	0.0566635	-0.635086	-0.309525	-0.173935		13.7597	0.211651	-0.0257874	-0.120823	-0.261944	0.0873184	-0.22332	-0.419338	-0.350063	-0.134056	-0.37114
		13.77	0.0446129	-0.155411	0.137794	0.489765	0.385124	-0.0252686	0.0440407	-0.566399	-0.327724	-0.109406		13.77	0.167648	-0.0674553	0.0104027	-0.230392	0.0670128	-0.121754	-0.415771	-0.365669	-0.0894623	-0.25386
		13.7802	0.0305099	-0.218578	0.194199	0.642544	0.342598	-0.154991	0.167233	-0.554653	-0.380154	-0.00440598		13.7802	0.19688	-0.0764313	-0.0636978	-0.212868	0.0581207	-0.142654	-0.310963	-0.313084	-0.115623	-0.165733
		13.7904	0.018364	-0.225872	0.160542	0.595932	0.260155	-0.153633	0.216831	-0.548813	-0.322067	0.00980377		13.7904	0.232632	-0.114719	-0.136261	-0.223652	-0.00646973	-0.159782	-0.281372	-0.347107	-0.0885315	-0.224892
		13.8007	0.0527916	-0.345501	0.0397034	0.631443	0.0436096	0.0591812	0.192101	-0.492249	-0.195641	0.139145		13.8007	0.15451	-0.151985	-0.140137	-0.12315	-0.0354233	-0.0717697	-0.258129	-0.419933	-0.109512	-0.227993
		13.8109	-0.0342216	-0.24218	0.0424538	0.530327	-0.0436745	0.224678	0.182968	-0.518005	-0.0821228	0.215652		13.8109	0.191101	-0.13253	-0.140602	-0.203449	-0.0331573	-0.0810318	-0.347313	-0.388962	-0.0324898	-0.302418
		13.8212	-0.0492783	-0.257343	0.0129852	0.498775	-0.0808411	0.194054	0.251736	-0.523182	-0.0530434	0.197594		13.8212	0.208656	-0.104553	-0.177105	-0.148899	-0.0329895	-0.10627	-0.341599	-0.375134	-0.0416107	-0.322395
		13.8314	-0.0331497	-0.205788	0.00828552	0.469078	0.0244751	0.17289	0.300301	-0.525421	-0.0647011	0.0947151		13.8314	0.127739	-0.0364838	-0.243515	-0.0519676	-0.0112457	-0.256363	-0.341805	-0.325996	0.00899506	-0.340065
		13.8416	-0.0113831	-0.0704155	0.109512	0.485817	0.0238457	0.157822	0.188293	-0.428932	-0.107975	0.0508347		13.8416	0.155323	-0.0488815	-0.229088	-0.00304413	0.087944	-0.211292	-0.363079	-0.371918	-0.0304375	-0.230511
		13.8519	-0.00373077	-0.0535812	0.061264	0.492016	0.0414658	0.0866699	0.107826	-0.431534	-0.162739	0.0961914		13.8519	0.175961	-0.00473785	-0.250393	0.0511818	0.08461	-0.0674057	-0.328415	-0.387962	-0.0450287	-0.201241
		13.8621	0.0349426	-0.172276	0.0871239	0.470699	0.0363235	0.00242233	0.187332	-0.354954	-0.123058	0.0404968		13.8621	0.20649	0.0490837	-0.211079	-0.0310593	0.0854797	-0.135677	-0.2966	-0.392929	-0.149544	-0.174553
		13.8724	0.0456963	-0.237762	0.0745697	0.549107	0.0863953	-0.116917	0.32386	-0.316925	-0.133976	0.0100899		13.8724	0.145142	0.0540657	-0.215942	-0.152641	0.18124	-0.286594	-0.462608	-0.49929	-0.214211	-0.212494
		13.8826	0.0505371	-0.229012	0.0597992	0.604786	0.124172	-0.0786972	0.410347	-0.260014	-0.178524	-0.0549278		13.8826	0.208679	0.0261612	-0.181206	-0.14325	0.178799	-0.220306	-0.392254	-0.422676	-0.147095	-0.243797
		13.8928	0.0754013	-0.27668	0.12368	0.522247	0.056366	-0.0486221	0.392044	-0.210342	-0.131554	0.0215912		13.8928	0.230915	0.0813789	-0.112026	-0.0807457	0.200741	-0.259296	-0.324528	-0.385124	-0.102322	-0.253574
		13.9031	-0.00912476	-0.222145	0.142994	0.549248	0.00360489	0.0132217	0.44883	-0.165195	-0.150188	0.0971146		13.9031	0.213379	0.134117	-0.0703888	-0.095192	0.15728	-0.260265	-0.414543	-0.322849	-0.0238571	-0.179165
		13.9133	0.0151215	-0.192558	0.148132	0.476707	-0.0652733	0.0983505	0.387875	-0.222954	-0.149555	0.0753212		13.9133	0.162071	0.181286	-0.102798	-0.069397	0.16481	-0.236542	-0.432762	-0.333206	0.0218468	-0.158222
		13.9236	-0.0380936	-0.248474	0.199642	0.450043	-0.0959816	0.205475	0.269131	-0.283855	-0.128384	0.00472641		13.9236	0.174076	0.268135	-0.143059	-0.0841675	0.136559	-0.243385	-0.448124	-0.339275	-0.0175552	-0.191792
		13.9338	0.0026741	-0.35778	0.160351	0.535263	-0.0292969	0.177959	0.186363	-0.36145	-0.0625687	0.0769043		13.9338	0.162872	0.256378	-0.164921	-0.126392	0.0650253	-0.175896	-0.411049	-0.306099	-0.118286	-0.222855
		13.944	0.051609	-0.302563	0.0858688	0.485352	-0.012455	0.115589	0.199348	-0.389641	-0.0689621	0.0830917		13.944	0.242073	0.204071	-0.185051	-0.111206	-0.02211	-0.132687	-0.331848	-0.406178	-0.110107	-0.157341
		13.9543	0.00679779	-0.305054	0.100292	0.45858	-0.0990715	0.00294495	0.224342	-0.416931	-0.0565491	0.0928192		13.9543	0.269852	0.24379	-0.165134	-0.0993423	0.0373688	-0.11805	-0.276535	-0.529629	-0.0909729	-0.1633
		13.9645	-0.0177727	-0.333748	0.101402	0.484219	-0.0885696	0.0865746	0.259285	-0.406784	-0.0366783	0.105537		13.9645	0.187618	0.182076	-0.25621	-0.0714607	0.0657005	-0.189693	-0.327213	-0.409824	-0.158649	-0.204247
		13.9748	0.032238	-0.241096	0.110306	0.548233	-0.0632858	0.12447	0.343422	-0.284584	-0.00893402	0.143162		13.9748	0.186832	0.157803	-0.30933	-0.107178	-0.0624733	-0.255505	-0.378887	-0.441177	-0.0880775	-0.237839
		13.985	0.102978	-0.245781	0.0883942	0.507298	-0.0209427	0.0836906	0.3106	-0.311798	-0.0215607	0.146633		13.985	0.115601	0.119678	-0.294643	-0.0706825	-0.0254784	-0.273544	-0.30159	-0.430233	-0.108925	-0.287739
		13.9952	0.255638	-0.335571	0.112537	0.451427	-0.0226364	0.045208	0.282269	-0.376911	-0.0759544	0.0687752		13.9952	0.0462837	0.0792351	-0.271454	-0.103848	0.0436859	-0.223961	-0.194065	-0.420792	-0.113266	-0.375572
		14.0055	0.296867	-0.408501	0.163513	0.354271	0.044136	0.0456009	0.261227	-0.364574	-0.0274353	0.0831261		14.0055	0.119488	0.103203	-0.25547	-0.159939	-0.0159416	-0.219757	-0.183933	-0.471989	-0.11298	-0.364178
		14.0157	0.195461	-0.364967	0.102463	0.362339	0.0968132	0.106922	0.283985	-0.349293	-0.0385628	0.196747		14.0157	0.14785	-0.0072403	-0.163563	-0.136551	-0.0589294	-0.151047	-0.218685	-0.356823	-0.108559	-0.330502
		14.026	0.0293159	-0.374672	0.04002	0.36277	0.14439	0.0118065	0.244656	-0.266846	-0.0325394	0.172104		14.026	0.052494	0.0180664	-0.122158	-0.213104	-0.0333252	-0.187771	-0.240929	-0.393875	-0.0329323	-0.364407
		14.0362	-0.0607605	-0.338493	0.014843	0.337822	0.110107	0.00614166	0.309925	-0.241871	-0.0856094	0.200977		14.0362	-0.0214005	0.0170403	-0.250999	-0.208717	0.0512924	-0.111645	-0.113243	-0.533501	-0.0546875	-0.370327
		14.0464	-0.0621185	-0.307472	0.0498352	0.349026	0.00320053	0.0642357	0.266056	-0.207539	-0.071949	0.165764		14.0464	0.121613	0.0279503	-0.239689	-0.318344	0.0914497	-0.0598984	-0.104179	-0.573166	-0.0701256	-0.334446
		14.0567	-0.031395	-0.296913	0.222008	0.338638	0.0128403	0.0499763	0.174049	-0.314491	-0.0673714	0.131611		14.0567	0.167236	0.0722961	-0.271564	-0.273281	0.0580978	-0.0603752	-0.219185	-0.54496	-0.0185318	-0.296169
		14.0669	-0.0721664	-0.281281	0.200466	0.323849	0.108295	0.00846863	0.0883408	-0.294029	-0.0550003	0.150455		14.0669	0.207764	0.0991287	-0.341995	-0.252502	-0.012558	-0.165146	-0.217789	-0.524216	-0.0351601	-0.264103
		14.0772	-0.0585899	-0.225372	0.126892	0.325733	0.182823	0.0179825	0.0479584	-0.215302	-0.0768051	0.14719		14.0772	0.175438	0.111813	-0.345459	-0.30505	0.000205994	-0.247017	-0.214497	-0.447613	-0.00745392	-0.238831
		14.0874	-0.0334854	-0.163635	0.0799103	0.385506	0.159565	0.047699	0.0754166	-0.112312	-0.1049	0.110035		14.0874	0.138649	0.105461	-0.241772	-0.343281	-0.113899	-0.248756	-0.238388	-0.439697	-0.0705299	-0.189819
		14.0976	-0.0681839	-0.201115	0.0760345	0.36586	0.0990524	0.0526009	0.164261	-0.12159	-0.18148	0.0272903		14.0976	0.163166	0.063736	-0.188644	-0.18615	-0.0626144	-0.275524	-0.285202	-0.498692	-0.205357	-0.109402
		14.1079	-0.082798	-0.208149	0.08992	0.374226	-0.00194931	0.0626221	0.274551	-0.0698891	-0.217064	0.144199		14.1079	0.140064	-0.0381393	-0.263206	-0.18037	-0.0246811	-0.158661	-0.334469	-0.455299	-0.131073	-0.00590515
		14.1181	-0.0281296	-0.223038	0.0556374	0.35537	0.0143089	0.12043	0.361996	-0.148052	-0.223717	0.116234		14.1181	0.126713	0.0408821	-0.418201	-0.224121	-0.0677986	-0.157135	-0.330456	-0.465672	-0.167744	-0.0122948
		14.1284	0.0423355	-0.139137	0.0397263	0.345291	0.0639343	0.103813	0.279335	-0.227413	-0.218472	0.177017		14.1284	0.181358	0.16114	-0.320118	-0.226124	-0.0897827	-0.158566	-0.326458	-0.451263	-0.166267	-0.140469
		14.1386	-0.00837708	-0.141163	0.0152512	0.274864	0.140514	0.0933456	0.182655	-0.228867	-0.266834	0.224388		14.1386	0.150234	0.111	-0.206501	-0.236694	-0.11869	-0.100746	-0.298553	-0.501266	-0.198513	-0.148636
		14.1488	0.0379868	-0.0971985	-0.0798416	0.296169	-0.00331116	0.00609589	0.183907	-0.221748	-0.256119	0.262035		14.1488	0.130695	0.060997	-0.166672	-0.209339	-0.0721512	-0.145905	-0.290958	-0.593132	-0.188786	-0.060051
		14.1591	0.105698	-0.104652	-0.0828362	0.315323	0.00506973	0.0437775	0.205734	-0.238937	-0.195808	0.20681		14.1591	0.144371	-0.113503	-0.204224	-0.355858	-0.0368767	-0.102345	-0.363953	-0.568466	-0.180157	0.0335312
		14.1693	0.0486298	-0.244659	-0.100624	0.351707	-0.0304184	0.0461617	0.174225	-0.308174	-0.144333	0.109104		14.1693	0.189987	-0.168602	-0.256126	-0.339657	-0.0373421	-0.0649757	-0.356895	-0.569599	-0.27607	-0.0306435
		14.1796	-0.00453949	-0.330421	-0.0339928	0.31646	-0.0468826	-0.0170326	0.147537	-0.295609	-0.200409	0.0788269		14.1796	0.163239	-0.152222	-0.246056	-0.290459	-0.0853119	-0.0194931	-0.364334	-0.573666	-0.281364	-0.0731544
		14.1898	0.024395	-0.262054	-0.00657654	0.363068	-0.0969734	-0.127312	0.119392	-0.197716	-0.225647	0.0327263		14.1898	0.182968	0.037796	-0.283653	-0.149837	-0.1726	-0.0641632	-0.28619	-0.576035	-0.180523	-0.10825
		14.2	0.0438347	-0.24242	-0.0237808	0.215855	-0.162945	-0.0237083	0.197235	-0.130951	-0.204796	0.0636253		14.2	0.301033	0.102528	-0.438969	-0.152954	-0.158005	-0.127655	-0.214321	-0.596706	-0.129826	-0.14669
		14.2103	0.0448532	-0.215572	-0.0924759	0.145203	-0.0953636	0.0422745	0.185528	-0.0997238	-0.256714	0.157631		14.2103	0.176079	0.184887	-0.500401	-0.219803	-0.257698	-0.0991974	-0.252525	-0.652321	-0.053566	-0.185783
		14.2205	0.0152397	-0.128708	-0.061985	0.151402	-0.075779	0.0468407	0.228432	-0.085434	-0.27462	0.160557		14.2205	0.179607	0.289864	-0.351063	-0.22184	-0.173454	-0.041214	-0.278099	-0.641376	-0.0606384	-0.255733
		14.2308	0.00579834	-0.150818	-0.0859833	0.235287	0.0305099	0.0580215	0.232246	-0.0437202	-0.195381	0.179375		14.2308	0.171204	0.349873	-0.291126	-0.318138	-0.117691	-0.0756187	-0.203209	-0.569256	-0.215069	-0.399002
		14.241	0.015892	-0.205059	-0.098999	0.31572	0.0494843	0.174824	0.256149	-0.0370827	-0.173386	0.171047		14.241	0.146572	0.389488	-0.349552	-0.269802	-0.106232	-0.154121	-0.129253	-0.621429	-0.215237	-0.494614
		14.2512	-0.032341	-0.274536	-0.133476	0.185314	-0.0440674	0.207069	0.281227	-0.148399	-0.273891	0.148064		14.2512	0.164948	0.402912	-0.326927	-0.17329	-0.102345	-0.250679	-0.118191	-0.466831	-0.139957	-0.4757
		14.2615	-0.160324	-0.27853	-0.0810585	0.142063	-0.0735855	0.13929	0.197632	-0.228439	-0.231251	0.0315552		14.2615	0.0588264	0.428432	-0.336235	-0.175087	-0.164192	-0.210659	-0.187721	-0.474865	-0.159103	-0.358837
		14.2717	-0.162659	-0.333103	0.0349579	0.163727	-0.206085	0.0776901	0.137272	-0.107666	-0.190292	-0.0638657		14.2717	0.144833	0.349434	-0.266224	-0.0725327	-0.130955	-0.156433	-0.212135	-0.611671	-0.0521355	-0.313744
		14.282	-0.112495	-0.251518	0.133553	0.175053	-0.169033	0.0507393	0.0826645	-0.060688	-0.0834084	0.000656128		14.282	0.14537	0.407974	-0.235455	-0.133411	-0.0276146	-0.143154	-0.198666	-0.593704	-0.0155602	-0.247398
		14.2922	-0.141113	-0.29081	0.0378647	0.208988	-0.141701	0.0579033	0.0973854	-0.170002	-0.161308	0.0447159		14.2922	0.14748	0.339825	-0.207741	-0.176876	0.0307961	-0.167973	-0.275406	-0.529018	-0.0366058	-0.317184
		14.3024	-0.175686	-0.340137	-0.00881577	0.225533	-0.0941849	0.096241	0.210243	-0.201714	-0.211376	-0.00829315		14.3024	0.137146	0.31403	-0.226562	-0.205559	0.107941	-0.173145	-0.368816	-0.552063	-0.0152283	-0.346962
		14.3127	-0.113865	-0.387833	-0.116962	0.159267	-0.132339	0.0849609	0.254898	-0.236591	-0.287113	-0.0112		14.3127	0.094429	0.21022	-0.143616	-0.215309	0.156673	-0.137821	-0.44698	-0.54248	0.0438538	-0.318592
		14.3229	-0.0341034	-0.414486	-0.238525	0.21265	-0.123734	0.0170364	0.225761	-0.236568	-0.286171	0.0549622		14.3229	0.14592	0.137775	-0.581734	-0.220375	0.0920601	-0.0607185	-0.318604	-0.525291	0.0418587	-0.206192
		14.3332	-0.0315056	-0.36367	-0.231369	0.205475	-0.122318	0.0250854	0.23233	-0.250542	-0.248878	0.0296021		14.3332	0.178631	0.175468	-0.886398	-0.252861	0.07127	-0.0939178	-0.24894	-0.611694	0.0323486	-0.183613
		14.3434	0.0182533	-0.31876	-0.121101	0.176445	-0.202881	-0.00153351	0.295532	-0.230186	-0.167023	0.0178604		14.3434	0.121124	0.0530891	-0.76638	-0.285225	0.089798	-0.084465	-0.23547	-0.697311	-0.0121422	-0.224407
		14.3536	-0.0123215	-0.309868	-0.0667992	0.176804	-0.246471	-0.0365677	0.237732	-0.273701	-0.109524	0.000530243		14.3536	0.0506325	0.0749054	-0.528412	-0.314537	0.0431366	-0.120228	-0.215538	-0.569801	-0.0811005	-0.26609
		14.3639	-0.0745239	-0.27401	-0.0443649	0.134117	-0.309845	-0.0491714	0.105587	-0.245663	-0.157867	0.00992203		14.3639	-0.0491219	0.0922775	-0.316086	-0.21209	0.029438	-0.0472221	-0.199501	-0.530991	-0.0127869	-0.191814
		14.3741	-0.141151	-0.390373	-0.0284615	0.200874	-0.319069	-0.053688	0.084549	-0.248165	-0.1968	0.0316544		14.3741	-0.110092	0.0854797	-0.256401	-0.146835	-0.0395927	-0.0373688	-0.166336	-0.530045	-0.0822372	-0.250919
		14.3844	-0.108849	-0.477478	-0.058754	0.20805	-0.165565	-0.0505295	-0.0281067	-0.274891	-0.183495	-0.0388565		14.3844	-0.175396	0.0913239	-0.292545	-0.172668	-0.0841446	-0.0456734	-0.176723	-0.636429	-0.168747	-0.206097
		14.3946	-0.193283	-0.454803	-0.168987	0.134926	-0.1623	0.0268021	-0.0469055	-0.350758	-0.160297	-0.105675		14.3946	-0.197777	0.0614815	-0.383846	-0.20369	-0.00821686	-0.0916176	-0.121014	-0.641769	-0.107079	-0.195415
		14.4049	-0.208603	-0.38155	-0.272652	0.0166779	-0.0925026	0.0404015	-0.107655	-0.384247	-0.00587463	-0.0839195		14.4049	-0.208839	0.0343742	-0.383026	-0.26297	0.0148468	-0.199562	-0.104671	-0.624767	-0.0578804	-0.258892
		14.4151	-0.0961151	-0.355358	-0.145992	0.0146523	-0.136955	0.065834	-0.131172	-0.33625	-0.0212784	-0.0624046		14.4151	-0.173157	-0.0269318	-0.38546	-0.186222	0.0140038	-0.23753	-0.187057	-0.622074	-0.0619583	-0.269764
		14.4253	-0.0381317	-0.319168	0.00324631	0.117054	-0.16404	0.00765991	-0.157352	-0.351509	-0.0647278	-0.0728798		14.4253	-0.107891	-0.10162	-0.3493	-0.156372	-0.0888672	-0.216228	-0.173584	-0.710304	-0.0820694	-0.252621
		14.4356	-0.0835114	-0.333511	0.0507393	0.195793	-0.168716	0.0527763	-0.133701	-0.25906	-0.105995	-0.103195		14.4356	-0.0318909	-0.126213	-0.351349	-0.222485	-0.221832	-0.230534	-0.17244	-0.774818	0.00485611	-0.143543
		14.4458	-0.177807	-0.326294	0.000465393	0.187935	-0.176235	0.0887299	-0.0693512	-0.293266	-0.158211	-0.181839		14.4458	-0.0803757	-0.105373	-0.433167	-0.258392	-0.282494	-0.246151	-0.198467	-0.690418	-0.0158005	-0.00894928
		14.456	-0.156181	-0.398155	-0.0228271	0.162281	-0.196083	0.0634575	-0.076313	-0.312004	-0.165981	-0.182934		14.456	-0.0700302	-0.101608	-0.447639	-0.360245	-0.243225	-0.249107	-0.242764	-0.580399	-0.0579414	0.0178261
		14.4663	-0.21431	-0.417004	-0.0744667	0.228302	-0.223251	0.0233803	0.0434456	-0.340305	-0.258812	-0.183292		14.4663	-0.0612793	-0.130527	-0.404373	-0.309723	-0.263611	-0.246376	-0.372082	-0.530392	-0.0605392	0.0629959
		14.4765	-0.163086	-0.463291	-0.033577	0.15501	-0.301262	-0.0318871	0.096859	-0.476997	-0.276241	-0.245613		14.4765	-0.124939	-0.0731773	-0.48793	-0.320786	-0.211613	-0.181931	-0.468269	-0.504105	-0.033062	0.112923
		14.4868	-0.11322	-0.467789	-0.111145	0.0018158	-0.31403	-0.0209045	0.161255	-0.584835	-0.199806	-0.313324		14.4868	-0.229439	-0.0345154	-0.506729	-0.286369	-0.22525	-0.25808	-0.331966	-0.546749	-0.0245514	0.0540085
		14.497	-0.0742149	-0.418301	-0.110214	-0.0151749	-0.289043	-0.0212135	0.19677	-0.528751	-0.109467	-0.263462		14.497	-0.173706	-0.0496788	-0.516502	-0.273293	-0.194271	-0.298412	-0.376167	-0.606171	0.00674057	-0.0400467
		14.5072	-0.0981674	-0.365623	-0.172993	0.00118256	-0.283642	-0.0532494	0.120667	-0.522121	-0.219364	-0.345169		14.5072	-0.179401	-0.120552	-0.698929	-0.432125	-0.133316	-0.321373	-0.383217	-0.638527	0.0522079	-0.0226898
		14.5175	-0.103611	-0.290115	-0.18322	-0.0811195	-0.280876	-0.18433	0.115257	-0.518284	-0.232063	-0.343712		14.5175	-0.146587	-0.128036	-0.731651	-0.411812	-0.166622	-0.300472	-0.473564	-0.623482	0.0486794	-0.0999603
		14.5277	-0.152534	-0.204525	-0.119362	-0.0120735	-0.20314	-0.131451	0.114971	-0.516567	-0.302666	-0.316307		14.5277	-0.108582	-0.138313	-0.595703	-0.35165	-0.332218	-0.253349	-0.465187	-0.589054	0.0491791	-0.109901
		14.538	-0.186771	-0.291058	-0.0728683	0.0652695	-0.210701	-0.105137	0.0774193	-0.481506	-0.333115	-0.304329		14.538	-0.141136	-0.087944	-0.632587	-0.315754	-0.370304	-0.271873	-0.521606	-0.743301	0.119907	-0.203053
		14.5482	-0.147926	-0.244293	-0.0165558	0.0975876	-0.219151	-0.110947	-0.0309334	-0.432262	-0.394569	-0.287186		14.5482	-0.0920219	-0.146515	-0.644699	-0.381668	-0.335342	-0.291832	-0.548332	-0.8498	0.104755	-0.186687
		14.5584	-0.116524	-0.245972	0.0178146	0.11021	-0.218662	-0.0448647	-0.00879288	-0.387367	-0.353848	-0.3643		14.5584	-0.0787888	-0.219685	-0.695675	-0.390083	-0.334396	-0.281055	-0.592117	-0.867001	0.10577	-0.120575
		14.5687	-0.112591	-0.278873	-0.00822067	0.0673447	-0.151142	-0.178345	-0.00164032	-0.388489	-0.39534	-0.420197		14.5687	-0.0600891	-0.220497	-0.741753	-0.364822	-0.337322	-0.225014	-0.572853	-0.809364	0.0619736	-0.0765152
		14.5789	-0.109882	-0.27319	-0.0495758	0.0346451	-0.131104	-0.592693	-0.0238037	-0.266167	-0.309452	-0.365887		14.5789	-0.0389023	-0.161774	-0.649826	-0.400009	-0.407188	-0.280148	-0.541153	-0.766842	-0.0720558	-0.0305824
		14.5892	-0.0476303	-0.246964	-0.0430222	-0.0637016	-0.202579	-0.433334	0.0615158	-0.223465	-0.258896	-0.356335		14.5892	-0.0774536	-0.123009	-0.529808	-0.419601	-0.438076	-0.229057	-0.570877	-0.804916	-0.107113	-0.0972824
		14.5994	-0.0517578	-0.257572	-0.0351143	-0.0381165	-0.28299	-0.327034	-0.0263786	-0.270267	-0.308151	-0.319046		14.5994	-0.125057	-0.128681	-0.543564	-0.498348	-0.423592	-0.245586	-0.655884	-0.756088	-0.128716	-0.0900917
		14.6097	-0.0601234	-0.218102	-0.0155067	-0.00496674	-0.240608	-0.219795	-0.0325775	-0.311146	-0.466034	-0.226364		14.6097	-0.126377	-0.162251	-0.658566	-0.451309	-0.459591	-0.360935	-0.682178	-0.7001	-0.217716	-0.0861244
		14.6199	-0.0991211	-0.242538	-0.0355339	-0.100441	-0.302238	-0.138126	-0.0252838	-0.364895	-0.510925	-0.277107		14.6199	-0.0072403	-0.267654	-0.640553	-0.457104	-0.441616	-0.337105	-0.637405	-0.821796	-0.179966	-0.150864
		14.6301	-0.068531	-0.180397	-0.00106812	-0.169964	-0.198685	-0.209053	0.00603485	-0.340576	-0.509903	-0.280949		14.6301	0.0321083	-0.159721	-0.562244	-0.471916	-0.402397	-0.361458	-0.672134	-0.92551	-0.234276	-0.188484
		14.6404	-0.147591	-0.174137	-0.0363083	-0.187096	-0.193748	-0.137123	0.00260162	-0.222679	-0.423084	-0.219532		14.6404	0.158375	-0.166733	-0.480335	-0.528328	-0.37183	-0.425999	-0.578396	-0.861542	-0.2724	-0.253433
		14.6506	-0.169701	-0.10017	-0.187359	-0.160202	-0.291809	-0.0503006	-0.0170441	-0.206512	-0.392288	-0.178299		14.6506	0.0727959	-0.203911	-0.429886	-0.425499	-0.367493	-0.400749	-0.585705	-0.958973	-0.20047	-0.33733
		14.6609	-0.225864	-0.0645599	-0.201126	-0.118835	-0.30603	-0.0629845	-0.0119629	-0.261612	-0.451096	-0.116619		14.6609	0.0365448	-0.178307	-0.390106	-0.339355	-0.174942	-0.372711	-0.628464	-1.07797	-0.239792	-0.213154
		14.6711	-0.210747	-0.0649185	-0.160297	-0.123535	-0.287003	-0.134083	-0.0520401	-0.304398	-0.387833	-0.14349		14.6711	0.0236359	-0.128738	-0.341518	-0.266655	-0.191608	-0.279873	-0.632706	-1.14928	-0.333672	-0.17112
		14.6813	-0.164742	-0.109707	-0.0626984	-0.0186081	-0.172966	-0.121674	0.0125313	-0.431412	-0.426121	-0.137245		14.6813	0.0613289	-0.155266	-0.411289	-0.35638	-0.293652	-0.332897	-0.626198	-1.16441	-0.398415	-0.325554
		14.6916	-0.0923119	-0.144539	0.00330353	0.0508347	-0.180992	0.0174561	0.0101624	-0.370903	-0.328121	-0.126514		14.6916	0.0877686	-0.137848	-0.550777	-0.420265	-0.345715	-0.363594	-0.650925	-0.900715	-0.396042	-0.447231
		14.7018	-0.0711136	-0.191696	-0.0411148	0.0471725	-0.261848	0.0919151	0.0472946	-0.305981	-0.25774	-0.11042		14.7018	0.0386086	-0.16423	-0.469357	-0.410118	-0.258762	-0.298874	-0.632946	-0.840431	-0.289837	-0.415985
		14.7121	-0.0118675	-0.212822	-0.0367126	0.0112839	-0.362263	0.0347519	0.0677948	-0.302452	-0.226128	-0.0456429		14.7121	0.0267906	-0.19342	-0.489361	-0.323406	-0.239594	-0.414021	-0.64209	-0.8442	-0.293247	-0.349884
		14.7223	0.0398788	-0.237427	0.0152168	0.0592995	-0.432915	-0.107082	0.0559464	-0.315102	-0.207146	-0.0782928		14.7223	0.0387268	-0.256306	-0.453415	-0.298676	-0.142685	-0.513855	-0.568882	-0.97459	-0.303226	-0.379509
		14.7325	-0.0210953	-0.22374	-0.0174484	0.0762138	-0.403591	-0.0950546	0.0425262	-0.353569	-0.22591	-0.179787		14.7325	0.0475349	-0.19241	-0.463825	-0.272736	-0.219719	-0.391563	-0.499924	-0.821289	-0.383575	-0.370914
		14.7428	-0.0650101	-0.102776	-0.0377731	-0.054821	-0.337357	-0.113579	0.0330124	-0.281807	-0.254974	-0.255844		14.7428	0.0399666	-0.111618	-0.492435	-0.23164	-0.235443	-0.340549	-0.452702	-0.806576	-0.470097	-0.305206
		14.753	-0.176853	-0.123676	-0.105629	-0.124069	-0.24472	-0.143665	0.050415	-0.241886	-0.232384	-0.156342		14.753	0.0126686	-0.0204468	-0.365002	-0.176697	-0.318947	-0.335152	-0.457912	-0.805084	-0.617638	-0.278919
		14.7633	-0.256248	-0.11377	-0.122677	-0.0578499	-0.0924301	-0.220318	0.038269	-0.286194	-0.277695	-0.0880203		14.7633	0.07164	-0.0158005	-0.432926	-0.164158	-0.361973	-0.240009	-0.529678	-0.824696	-0.63414	-0.360172
		14.7735	-0.269806	-0.109589	0.0107193	0.00808716	-0.0701065	-0.180351	-0.0143013	-0.299297	-0.238224	-0.193512		14.7735	0.112206	-0.0374947	-0.449291	-0.161663	-0.247566	-0.252407	-0.508015	-0.902733	-0.475803	-0.396854
		14.7837	-0.108879	-0.18708	0.0811386	-0.111923	-0.196907	-0.0414467	-0.00756836	-0.371857	-0.23901	-0.162922		14.7837	0.155754	-0.123199	-0.478203	-0.110348	-0.138577	-0.216331	-0.457104	-0.910336	-0.345627	-0.462097
		14.794	0.0613365	-0.156853	0.0616112	-0.171371	-0.246559	0.00830078	-0.00604248	-0.379524	-0.26799	-0.0864449		14.794	0.226967	-0.185638	-0.397888	-0.0756187	-0.0264244	-0.103798	-0.531879	-0.890488	-0.390282	-0.439198
		14.8042	0.0797195	-0.197922	0.0758438	-0.228329	-0.268456	0.0556755	0.061348	-0.441395	-0.244183	-0.0900841		14.8042	0.23938	-0.207932	-0.300613	0.00267792	-0.0684586	-0.13818	-0.447472	-0.923626	-0.426785	-0.389809
		14.8145	0.0705872	-0.242363	0.0268745	-0.163708	-0.227234	0.0667953	0.0732346	-0.385033	-0.32999	-0.145836		14.8145	0.194923	-0.105232	-0.351601	0.0962105	0.0194969	-0.179012	-0.367077	-0.934521	-0.424751	-0.483124
		14.8247	0.00494003	-0.248608	-0.0188065	-0.142036	-0.237652	0.0488434	0.0145493	-0.268311	-0.213131	-0.231358		14.8247	0.115616	-0.0481529	-0.3848	-0.0186615	-0.136009	-0.252979	-0.359291	-0.788292	-0.395622	-0.577885
		14.8349	0.0526352	-0.255665	-0.14299	-0.116001	-0.285851	-0.00946045	-0.00700378	-0.310715	-0.219162	-0.219711		14.8349	0.0956955	-0.0338135	-0.34861	-0.0839882	-0.0561523	-0.27079	-0.338871	-0.701588	-0.390274	-0.572212
		14.8452	0.038559	-0.335297	-0.162109	-0.0834808	-0.292336	0.0533257	-0.0235023	-0.295563	-0.183338	-0.241646		14.8452	0.0359001	-0.0237045	-0.335461	-0.0368423	-0.0345764	-0.213509	-0.408371	-0.721413	-0.34856	-0.504845
		14.8554	0.0309525	-0.289974	-0.16626	-0.106941	-0.303787	-0.0163422	-0.00321198	-0.261032	-0.135441	-0.231049		14.8554	0.0661316	-0.0595398	-0.380714	-0.00411606	0.0100937	-0.183327	-0.372726	-0.747925	-0.310143	-0.399334
		14.8657	0.0510979	-0.186192	-0.228996	-0.186344	-0.375305	-0.0469894	-0.0475845	-0.242672	-0.120934	-0.234337		14.8657	0.101463	-0.0557594	-0.408237	0.082962	-0.0591431	-0.121609	-0.333317	-0.689953	-0.29084	-0.31237
		14.8759	0.0898399	-0.171646	-0.188862	-0.200352	-0.305981	0.00444031	-0.130981	-0.264591	-0.13443	-0.238167		14.8759	0.133045	-0.0646286	-0.406258	-0.0125465	-0.0306778	-0.194756	-0.218239	-0.684673	-0.318558	-0.295273
		14.8861	0.0464592	-0.196728	-0.143394	-0.13493	-0.321686	0.0786438	-0.0691605	-0.329109	-0.224155	-0.136848		14.8861	0.252136	-0.0117226	-0.36655	-0.116261	-0.0180664	-0.147778	-0.202217	-0.589211	-0.279133	-0.314671
		14.8964	0.0305557	-0.249229	-0.142284	-0.0355339	-0.314518	0.126415	-0.10582	-0.336967	-0.258606	-0.049015		14.8964	0.114426	-0.0456161	-0.348202	-0.0956459	-0.039299	-0.141129	-0.173195	-0.659306	-0.175755	-0.309006
		14.9066	0.00148392	-0.268787	-0.140724	0.00995636	-0.259514	0.10014	-0.146233	-0.309341	-0.32975	-0.0349236		14.9066	0.128899	-0.0306053	-0.364605	0.0184364	-0.00737381	-0.187237	-0.166878	-0.706726	-0.193325	-0.280624
		14.9169	0.0135231	-0.211224	-0.0915146	-0.0426483	-0.354252	0.0801392	-0.081131	-0.291557	-0.285324	-0.0433769		14.9169	0.152573	-0.0884209	-0.33218	0.051754	-0.0119133	-0.228493	-0.267712	-0.673645	-0.269562	-0.173988
		14.9271	-0.0309677	-0.151176	-0.0761108	0.0196381	-0.319038	0.103893	-0.0754929	-0.425789	-0.271767	-0.0740623		14.9271	0.135025	-0.0444107	-0.332005	0.025383	0.0603981	-0.168186	-0.222736	-0.648003	-0.231808	-0.10635
		14.9373	-0.0518188	-0.188717	0.0184441	0.0651894	-0.301014	0.0727921	-0.0802155	-0.436398	-0.297844	-0.0704155		14.9373	0.0571327	0.00743103	-0.27911	-0.0424919	0.090416	-0.0671234	-0.234955	-0.529488	-0.112732	-0.0386772
		14.9476	0.0341454	-0.287743	0.0161552	0.0180855	-0.28574	0.0797424	-0.162956	-0.418098	-0.258514	-0.119125		14.9476	0.0512695	0.0157051	-0.191826	0.0696259	0.15715	-0.0697441	-0.309856	-0.561508	-0.0729866	-0.0284042
		14.9578	-0.0299301	-0.202976	0.00971985	-0.092514	-0.299892	-0.0366287	-0.128063	-0.387451	-0.230522	-0.101562		14.9578	0.0605278	0.00575256	-0.224979	0.11441	0.118835	-0.137505	-0.235279	-0.551193	0.00361633	0.0182228
		14.9681	-0.017067	-0.2248	-0.0107384	-0.139843	-0.266228	-0.0188065	-0.026268	-0.419777	-0.163158	-0.122295		14.9681	0.0980453	-0.047596	-0.255852	-0.00456238	0.114876	-0.211063	-0.142113	-0.612537	-0.0394974	0.039753
		14.9783	0.00404358	-0.251266	-0.0962906	0.0578537	-0.272175	0.119286	0.00952911	-0.420494	-0.128647	-0.112839		14.9783	0.102219	-0.115196	-0.238876	-0.0296745	0.114521	-0.148956	-0.0748329	-0.700336	0.0127716	-0.0172195
		14.9885	0.0836754	-0.301968	-0.0491486	0.126007	-0.255745	0.181038	0.164062	-0.297985	-0.149162	-0.123997		14.9885	0.105148	-0.0884857	-0.282627	-0.056797	0.0187721	-0.130039	-0.0696487	-0.644295	0.0742607	0.0232544
		14.9988	0.115005	-0.255211	-0.070591	0.104836	-0.262779	0.138	0.181763	-0.246273	-0.159069	-0.160465		14.9988	0.180252	0.00649261	-0.353416	-0.0838432	0.0748825	-0.159401	-0.0222511	-0.526314	0.103813	0.0761185

## Sheet: panel B
		Top panel																																Bottom panel
		Post-stimulus time (ms)	Vm rel (mV)	Vm rel (mV)	Vm rel (mV)	Vm rel (mV)	Vm rel (mV)	Vm rel (mV)	Vm rel (mV)	Vm rel (mV)	Vm rel (mV)	Vm rel (mV)	Vm rel (mV)	Vm rel (mV)	Vm rel (mV)	Vm rel (mV)	Vm rel (mV)	Vm rel (mV)	Vm rel (mV)	Vm rel (mV)	Vm rel (mV)	Vm rel (mV)	Vm rel (mV)	Vm rel (mV)	Vm rel (mV)	Vm rel (mV)	Vm rel (mV)	Vm rel (mV)	Vm rel (mV)	Vm rel (mV)	Vm rel (mV)	Vm rel (mV)		Post-stimulus time (ms)	Vm rel (mV)	Vm rel (mV)	Vm rel (mV)	Vm rel (mV)	Vm rel (mV)	Vm rel (mV)	Vm rel (mV)	Vm rel (mV)	Vm rel (mV)	Vm rel (mV)	Vm rel (mV)	Vm rel (mV)	Vm rel (mV)	Vm rel (mV)	Vm rel (mV)
		0.00737282	-1.05754	0.805027	0.112766	-1.06448	-0.12645	1.0766	-0.870327	-0.114506	-1.17916	0.525337	-1.02351	1.32092	0.327679	-0.197224	-0.916069	-0.2402	-0.197021	-0.355915	0.749298	-0.769905	-2.09365	0.477215	-0.288799	0.304253	0.69421	0.998695	-1.1825	-0.171593	-0.597408	-0.581543		0.00737282	0.0137634	-0.914913	-1.1524	0.451023	-0.390156	0.205509	0.959797	-1.07042	-1.24994	-0.958115	0.729939	-2.27342	-0.969822	-1.7625	-1.16308
		0.0176128	-1.06401	0.74918	0.137886	-1.14525	-0.194721	1.09402	-0.805012	-0.145535	-1.24516	0.506851	-1.0225	1.4245	0.248821	-0.175133	-0.948505	-0.298347	-0.190929	-0.497929	0.570019	-0.66053	-2.08178	0.513836	-0.410992	0.24398	0.631088	0.911114	-1.08968	-0.183933	-0.580601	-0.547878		0.0176128	-0.0397148	-0.867611	-0.987881	0.451176	-0.451954	0.0486794	1.03478	-0.973923	-1.24171	-0.910252	0.742405	-2.24679	-0.939232	-1.66696	-1.28737
		0.0278529	-1.05066	0.618977	0.117714	-1.16222	-0.153748	1.25559	-0.70142	-0.0803375	-1.21618	0.402615	-0.833729	1.51969	0.257248	-0.17226	-1.13228	-0.234753	-0.0729599	-0.505333	0.501713	-0.64917	-2.18449	0.600441	-0.461689	0.323387	0.556881	0.845798	-1.07837	-0.32951	-0.536507	-0.554577		0.0278529	-0.0510864	-0.957874	-0.984615	0.427814	-0.410465	-0.0290794	1.00954	-0.869423	-1.21859	-0.817757	0.715023	-2.24973	-0.910824	-1.62701	-1.24398
		0.0380929	-1.01373	0.544128	0.0709953	-1.14597	-0.110119	1.28679	-0.595192	0.0155754	-1.26014	0.309689	-0.462227	1.54232	0.395092	-0.232426	-1.20464	-0.254932	-0.0502396	-0.434868	0.487144	-0.711349	-2.2723	0.700409	-0.513142	0.378986	0.46843	0.884277	-1.09351	-0.384502	-0.408592	-0.617245		0.0380929	-0.0610657	-0.849075	-0.960751	0.371605	-0.291176	-0.024395	0.917786	-0.834507	-1.25697	-0.672096	0.771851	-2.22629	-0.893215	-1.50321	-1.07492
		0.0483329	-1.05144	0.618622	0.036438	-0.98708	-0.16058	1.25854	-0.438324	0.0182114	-1.26448	0.285633	-0.352325	1.56077	0.503548	-0.308292	-1.20014	-0.326267	-0.0392494	-0.333649	0.544914	-0.79985	-2.26772	0.698063	-0.509373	0.459667	0.48959	0.917168	-1.02999	-0.355164	-0.294998	-0.592178		0.0483329	-0.0918808	-0.807957	-1.078	0.341721	-0.348228	0.00141144	0.859421	-0.772934	-1.16355	-0.640339	0.826435	-2.19024	-0.88728	-1.4874	-0.984497
		0.058573	-1.01939	0.607773	0.140747	-0.878647	-0.171951	1.11057	-0.37215	-0.0289497	-1.18363	0.217564	-0.316063	1.48763	0.49791	-0.338581	-1.16531	-0.456814	-0.0644379	-0.194016	0.590023	-0.964657	-2.18468	0.629208	-0.586277	0.442276	0.391384	0.966698	-1.09759	-0.348392	-0.286308	-0.537315		0.058573	-0.0960541	-0.745232	-1.13383	0.32782	-0.345032	-0.0524712	0.853889	-0.763874	-1.10431	-0.708443	0.758152	-2.13371	-0.847942	-1.5043	-1.0377
		0.068813	-1.01649	0.634247	0.278816	-0.969128	-0.263969	0.961277	-0.45343	-0.106995	-1.21597	0.165138	-0.285297	1.34156	0.441391	-0.287846	-1.12002	-0.464561	0.0275803	-0.119358	0.575336	-1.1786	-2.0134	0.629398	-0.664619	0.427422	0.370476	1.00544	-1.17752	-0.376167	-0.292591	-0.504032		0.068813	0.0427208	-0.791794	-1.15734	0.291019	-0.339169	-0.109177	0.923401	-0.773125	-1.19483	-0.862034	0.797993	-2.1411	-0.734348	-1.46463	-1.09733
		0.079053	-0.979904	0.673065	0.434002	-0.963428	-0.498455	0.92804	-0.567955	-0.157013	-1.29234	0.173111	-0.337223	1.29275	0.424023	-0.292221	-1.00771	-0.319057	0.1782	-0.133816	0.597401	-1.20471	-2.04763	0.669262	-0.68877	0.410648	0.331444	1.02603	-1.29181	-0.338951	-0.369553	-0.507954		0.079053	0.0471077	-0.832684	-1.13941	0.180702	-0.239937	-0.111954	0.951214	-0.860638	-1.25578	-1.01575	0.801083	-2.13102	-0.724678	-1.44664	-1.05422
		0.089293	-1.03978	0.750561	0.618515	-0.849789	-0.656525	0.901516	-0.738483	-0.212708	-1.26232	0.273415	-0.391273	1.27574	0.47966	-0.267117	-0.969223	-0.247471	0.309807	-0.132587	0.675568	-1.20062	-2.15645	0.611385	-0.705914	0.459358	0.425121	1.08731	-1.21366	-0.236992	-0.436798	-0.525955		0.089293	0.0621986	-0.923019	-0.962467	0.149517	-0.210564	-0.106102	0.982304	-0.839252	-1.26748	-1.10189	0.634964	-2.15357	-0.665768	-1.38685	-0.937908
		0.0995331	-1.02436	0.863976	0.712593	-0.78743	-0.601856	0.97242	-0.657539	-0.170353	-1.19523	0.31118	-0.47385	1.27537	0.393196	-0.290527	-0.945667	-0.138252	0.299114	-0.148182	0.820705	-1.17227	-2.28014	0.489922	-0.711197	0.409576	0.605972	1.06264	-1.12459	-0.241608	-0.576763	-0.525253		0.0995331	0.149231	-0.924236	-0.83173	0.251442	-0.176888	-0.0260887	1.09114	-0.914543	-1.27201	-1.07322	0.506599	-2.11605	-0.533897	-1.23933	-0.943714
		0.109773	-1.08281	0.890369	0.640018	-0.817364	-0.449448	0.962372	-0.606304	-0.067524	-1.17068	0.392563	-0.513832	1.25871	0.367779	-0.279873	-0.928574	-0.0621605	0.210804	-0.15406	0.880486	-1.19854	-2.2511	0.444695	-0.67033	0.222847	0.696617	1.0519	-0.980835	-0.254444	-0.624542	-0.556438		0.109773	0.205143	-0.7906	-0.792507	0.307579	-0.264984	-0.00778961	1.0928	-0.905853	-1.30931	-1.01568	0.427872	-2.14066	-0.426178	-1.13395	-0.990826
		0.120013	-1.07695	0.924263	0.532825	-0.948612	-0.386467	1.01751	-0.771942	-0.0594292	-1.13304	0.475712	-0.444096	1.15308	0.4734	-0.446526	-0.860649	-0.0587044	0.167366	-0.310413	0.912247	-1.30401	-2.231	0.438198	-0.598675	0.256512	0.73634	1.14666	-0.929707	-0.316624	-0.636868	-0.596504		0.120013	0.153835	-0.659687	-0.797741	0.250977	-0.38678	-0.0292015	1.00446	-0.892059	-1.23973	-1.03956	0.519485	-2.18436	-0.416904	-1.03621	-0.979691
		0.130253	-1.0664	0.964218	0.402603	-0.991074	-0.339809	1.12355	-0.861912	-0.0543518	-0.97057	0.494667	-0.382164	1.17354	0.551147	-0.571182	-0.820213	-0.0613251	0.0474663	-0.246124	0.965794	-1.38417	-2.13706	0.431034	-0.600201	0.391418	0.727531	1.25145	-0.9123	-0.48254	-0.554852	-0.656322		0.130253	0.112541	-0.584812	-0.746078	0.218529	-0.471718	-0.0667267	1.05449	-0.879936	-1.32374	-1.1591	0.620216	-2.0827	-0.507919	-0.958519	-0.959282
		0.140493	-0.979736	0.985771	0.318356	-1.07326	-0.249306	1.18086	-0.780991	0.00202179	-0.867477	0.549706	-0.426357	1.18568	0.555237	-0.584343	-0.910023	-0.0757599	0.0654526	-0.147358	0.968906	-1.45078	-2.12062	0.296864	-0.598473	0.518436	0.609489	1.21073	-0.809925	-0.59753	-0.498337	-0.726311		0.140493	0.0401688	-0.636379	-0.694912	0.329285	-0.45586	-0.0147514	1.1339	-0.96883	-1.30917	-1.27671	0.683159	-2.03095	-0.557796	-0.892513	-0.876827
		0.150733	-0.909595	1.0209	0.256737	-1.0703	-0.170807	1.1679	-0.629562	0.0569077	-0.832134	0.538929	-0.535828	1.33292	0.628979	-0.644688	-0.961571	-0.137821	0.175198	-0.117283	0.969429	-1.30388	-2.19926	0.202579	-0.479214	0.486774	0.534615	1.19174	-0.920681	-0.630417	-0.606266	-0.699272		0.150733	-0.0668106	-0.679295	-0.581627	0.353737	-0.403301	0.0271034	1.15226	-1.00812	-1.29535	-1.36097	0.620346	-2.06543	-0.710266	-0.785549	-0.737804
		0.160973	-0.864212	0.87125	0.227863	-1.00346	-0.189381	1.21064	-0.597481	0.0410614	-0.797909	0.525566	-0.761932	1.45039	0.561756	-0.809959	-1.02591	-0.229065	0.178463	-0.11956	0.967369	-1.26801	-2.2742	0.248856	-0.443619	0.472603	0.567612	1.14809	-0.889854	-0.670914	-0.662437	-0.595848		0.160973	-0.0198669	-0.664333	-0.494034	0.258511	-0.371437	-0.0177917	1.13033	-1.03138	-1.23307	-1.34643	0.554283	-1.93611	-0.653236	-0.741619	-0.679474
		0.171213	-0.890034	0.741287	0.240761	-0.942856	-0.186974	1.18658	-0.664749	-0.0131073	-0.933483	0.661346	-0.893921	1.5084	0.519188	-0.857285	-1.07504	-0.217834	0.266476	-0.0170517	0.868305	-1.2513	-2.32005	0.425526	-0.480038	0.501022	0.550423	1.10915	-0.903538	-0.716751	-0.801208	-0.609245		0.171213	0.0273056	-0.561459	-0.501747	0.32254	-0.449306	0.0585022	1.15135	-1.05683	-0.953632	-1.36389	0.515621	-2.04471	-0.546177	-0.726849	-0.670868
		0.181453	-0.960915	0.85704	0.262794	-0.965408	-0.22084	1.1324	-0.79985	0.0322418	-1.0829	0.663204	-0.875992	1.47427	0.485355	-0.921741	-0.951115	-0.132637	0.247284	-0.0322495	0.833996	-1.22433	-2.18472	0.539181	-0.342003	0.475952	0.443825	1.0811	-0.997227	-0.73798	-0.737003	-0.64513		0.181453	0.0434685	-0.544685	-0.577957	0.386971	-0.591511	0.0465813	1.18156	-1.04868	-0.759964	-1.2862	0.582321	-1.84478	-0.53014	-0.739689	-0.682194
		0.191693	-1.02722	0.939949	0.252087	-0.898567	-0.24778	1.14464	-0.775711	0.111397	-1.25119	0.578472	-0.775436	1.43098	0.413948	-0.886826	-0.899403	0.00965118	0.208206	-0.0657234	0.935585	-1.27457	-2.05465	0.625607	-0.29705	0.450951	0.424427	1.16032	-1.0535	-0.705948	-0.632805	-0.710873		0.191693	0.139542	-0.624378	-0.659935	0.447433	-0.638123	-0.0744743	1.15049	-0.97596	-0.774689	-1.27903	0.651844	-1.37135	-0.549976	-0.765221	-0.614841
		0.201933	-1.00393	0.786777	0.215527	-0.876026	-0.347321	1.09159	-0.749725	0.217636	-1.25457	0.464661	-0.713745	1.44003	0.434395	-0.757545	-0.936657	0.0988541	0.22821	-0.105682	1.0159	-1.27728	-2.04093	0.649315	-0.370827	0.342007	0.424236	1.2893	-1.03138	-0.522987	-0.516514	-0.715702		0.201933	0.0398941	-0.663109	-0.623924	0.612576	-0.571865	-0.119312	1.0701	-0.979549	-0.843185	-1.31617	0.642651	-1.23143	-0.478001	-0.723297	-0.468369
		0.212173	-1.00247	0.646397	0.174934	-0.969833	-0.49192	0.866337	-0.781349	0.211937	-1.23605	0.298542	-0.748592	1.47172	0.363918	-0.657871	-0.887077	0.0567398	0.293667	-0.104359	0.916344	-1.35379	-2.05548	0.519688	-0.525597	0.193043	0.388237	1.40561	-1.16125	-0.449745	-0.565449	-0.670246		0.212173	-0.0285568	-0.67728	-0.661892	0.568027	-0.477295	-0.0313225	1.06481	-0.997383	-0.918873	-1.31367	0.771732	-1.27056	-0.425774	-0.768284	-0.559742
		0.222413	-1.07042	0.670547	0.15958	-1.03778	-0.480488	0.730488	-0.772564	0.281948	-1.19056	0.368843	-0.892704	1.53887	0.366768	-0.718536	-0.773865	0.0698624	0.300629	-0.172966	0.792427	-1.45438	-2.13167	0.447769	-0.563114	0.109989	0.365063	1.36883	-1.21073	-0.573948	-0.60281	-0.735634		0.222413	-0.204414	-0.642757	-0.789433	0.499695	-0.369244	0.0965652	1.04268	-0.961391	-0.974625	-1.42315	0.779148	-1.27912	-0.38945	-0.868492	-0.70079
		0.232653	-1.02265	0.663265	0.0497894	-0.950771	-0.447659	0.792988	-0.924805	0.351734	-1.15757	0.43877	-0.867882	1.52912	0.386448	-0.834721	-0.721638	0.0638313	0.236866	-0.159077	0.707191	-1.43477	-2.12903	0.454674	-0.425999	0.0847549	0.361652	1.47561	-1.14447	-0.689476	-0.539902	-0.746994		0.232653	-0.239376	-0.494461	-0.823563	0.391083	-0.355453	0.103348	1.10875	-0.820236	-0.956505	-1.37447	0.64072	-1.47751	-0.428326	-0.906544	-0.741642
		0.242893	-0.894169	0.597782	-0.0374832	-0.952583	-0.472527	0.842709	-1.03187	0.334972	-1.16524	0.469551	-0.801605	1.4277	0.359005	-0.93494	-0.701279	-0.0354462	0.189384	-0.102573	0.774235	-1.22932	-2.14381	0.445778	-0.368683	0.0893784	0.285503	1.4111	-1.10973	-0.752705	-0.481644	-0.535828		0.242893	-0.156445	-0.482433	-0.734062	0.403946	-0.302631	0.224644	1.12284	-0.773746	-1.01816	-1.3318	0.645073	-1.44629	-0.456684	-0.795956	-0.859886
		0.253133	-0.779381	0.576088	-0.00735855	-0.944057	-0.479084	0.756855	-0.945049	0.365219	-1.13031	0.470596	-0.756256	1.42395	0.320381	-1.01521	-0.769787	-0.0796242	0.121349	0.00495529	0.982613	-1.09817	-2.10117	0.435371	-0.367382	0.120827	0.217171	1.33392	-1.08958	-0.686604	-0.39225	-0.509659		0.253133	-0.150913	-0.450676	-0.645191	0.394218	-0.186474	0.289005	1.05066	-0.793606	-1.03642	-1.24213	0.672119	-1.4095	-0.40266	-0.805443	-0.992317
		0.263373	-0.75671	0.541111	0.000663757	-0.92403	-0.474075	0.673122	-0.843254	0.518223	-1.0066	0.495728	-0.774113	1.36757	0.298161	-0.990349	-0.859455	-0.075367	0.0470467	0.0554161	1.01181	-1.05782	-2.07012	0.431068	-0.307362	0.134239	0.209126	1.48446	-1.12803	-0.592129	-0.282722	-0.412422		0.263373	-0.0288773	-0.563328	-0.609653	0.344925	-0.235836	0.213547	0.878578	-0.839596	-1.07856	-1.21717	0.788708	-1.56191	-0.404827	-0.812954	-0.908405
		0.273614	-0.841003	0.510796	0.0926094	-0.928513	-0.548237	0.757416	-0.896435	0.673813	-1.01848	0.380047	-0.941757	1.28525	0.286919	-0.85601	-0.926262	0.0128708	0.0253868	-0.0408211	1.00052	-1.00724	-2.13042	0.367043	-0.338799	0.120026	0.179726	1.53112	-1.19398	-0.606495	-0.2649	-0.318508		0.273614	0.0668602	-0.631706	-0.661736	0.241383	-0.296349	0.116043	0.759502	-0.886875	-1.04981	-1.13664	0.88448	-1.58175	-0.385563	-0.796146	-0.749653
		0.283854	-0.864223	0.590736	0.0924911	-0.896698	-0.529247	0.652477	-0.902718	0.838024	-1.05074	0.312145	-1.04652	1.19659	0.356514	-0.88728	-0.849537	0.0806046	0.0868988	-0.0990448	0.88279	-1.0444	-2.04492	0.363144	-0.476425	0.122196	0.387867	1.47484	-1.2311	-0.632492	-0.283722	-0.345615		0.283854	0.0891762	-0.647907	-0.771446	0.0493584	-0.31274	0.00550079	0.691277	-0.871307	-1.0477	-1.03215	0.780659	-1.62239	-0.325397	-0.77898	-0.697678
		0.294094	-0.876133	0.591442	0.032135	-0.891487	-0.364929	0.643059	-0.78352	0.936684	-1.11518	0.323483	-1.16474	1.0765	0.515934	-0.983601	-0.712734	0.043911	0.0759544	-0.101463	0.782043	-1.10984	-2.19247	0.316757	-0.613289	0.0940857	0.536377	1.33494	-1.21047	-0.688702	-0.358719	-0.466625		0.294094	0.055748	-0.617031	-0.855358	0.0266991	-0.357204	0.0178261	0.647671	-0.824268	-1.00654	-0.901955	0.792629	-1.57843	-0.321095	-0.659817	-0.762646
		0.304334	-0.871506	0.570339	0.149269	-0.77018	-0.293404	0.636955	-0.86879	0.971123	-1.19166	0.359673	-1.18711	1.14735	0.535328	-1.03273	-0.557808	0.170822	0.122829	-0.0697556	0.702271	-1.12815	-2.38478	0.371666	-0.673084	0.0867577	0.497028	1.20754	-1.19349	-0.692394	-0.523548	-0.62001		0.304334	-0.0147285	-0.59803	-0.815456	0.0667534	-0.292164	-0.0146332	0.795395	-0.796513	-1.00372	-0.786121	0.713593	-1.50685	-0.34166	-0.693481	-0.819904
		0.314574	-0.886433	0.560017	0.328156	-0.790768	-0.311462	0.706512	-0.753075	0.914436	-1.25025	0.330978	-1.21861	1.17578	0.365311	-1.04457	-0.435486	0.191006	0.079174	-0.102249	0.650105	-1.02846	-2.53925	0.337811	-0.703983	0.143261	0.382442	1.01493	-1.28328	-0.662437	-0.634197	-0.752296		0.314574	-0.107784	-0.621384	-0.809628	-0.0110931	-0.124935	-0.0789223	0.766842	-0.890522	-1.0712	-0.835018	0.746185	-1.52202	-0.335735	-0.693436	-0.803703
		0.324814	-0.910049	0.553185	0.404808	-0.77837	-0.290482	0.669357	-0.631088	0.850174	-1.27486	0.402672	-1.28635	1.29406	0.165195	-1.11239	-0.396957	0.175354	-0.0760002	-0.163418	0.686989	-0.935642	-2.52812	0.339039	-0.677258	0.206882	0.417179	0.865181	-1.34956	-0.715607	-0.637215	-0.777225		0.324814	-0.267918	-0.593739	-0.814503	0.124737	-0.0840263	-0.0795555	0.886612	-0.989098	-1.18884	-0.896912	0.73138	-1.57814	-0.343124	-0.68446	-0.733047
		0.335054	-0.890652	0.650616	0.471157	-0.814789	-0.270393	0.685677	-0.603107	0.783928	-1.24457	0.34866	-1.43198	1.35113	0.0235863	-1.19464	-0.349323	0.189049	-0.0241432	-0.214603	0.773521	-0.897804	-2.41779	0.361305	-0.640659	0.244003	0.419613	0.809071	-1.43152	-0.584167	-0.667206	-0.61702		0.335054	-0.277798	-0.61198	-0.348217	0.25713	-0.148087	0.0933838	0.915806	-1.01133	-1.25061	-0.92823	0.739449	-1.54654	-0.26614	-0.665646	-0.61665
		0.345294	-0.755375	0.619896	0.375015	-0.807137	-0.327854	0.646694	-0.694626	0.66629	-1.14505	0.337479	-1.42005	1.29754	-0.100319	-1.24279	-0.378635	0.145645	0.0739288	-0.281147	0.876232	-0.866165	-2.33188	0.40514	-0.573341	0.200935	0.404793	0.908825	-1.42547	-0.508335	-0.702705	-0.453346		0.345294	-0.262005	-0.588055	-0.259548	0.327938	-0.317554	0.181515	1.0057	-0.862427	-1.28761	-0.987644	0.884121	-1.54842	-0.0986977	-0.631756	-0.497349
		0.355534	-0.716846	0.525028	0.353905	-0.678638	-0.341705	0.703987	-0.852814	0.769314	-1.11734	0.433952	-1.492	1.27187	-0.0700264	-1.23528	-0.490372	0.0653572	0.0671005	-0.386314	0.787064	-0.764149	-2.23024	0.349888	-0.438076	0.12146	0.237175	1.05998	-1.41052	-0.565044	-0.642433	-0.472729		0.355534	-0.340755	-0.511723	-0.27644	0.3349	-0.349491	0.182755	0.965878	-0.861698	-1.25055	-0.979786	0.967949	-1.61221	-0.0207481	-0.570065	-0.427799
		0.365774	-0.671032	0.573418	0.243732	-0.68119	-0.393658	0.706345	-0.853867	0.813919	-1.2181	0.465782	-1.39388	1.36337	0.0457726	-1.13682	-0.568512	-0.0315094	0.115486	-0.38728	0.816639	-0.80965	-2.18112	0.283237	-0.520401	0.0913582	0.0829544	1.19531	-1.4141	-0.610271	-0.533371	-0.636665		0.365774	-0.363392	-0.427704	-0.508709	0.276142	-0.427586	0.123817	0.850887	-0.962944	-1.20614	-0.935642	1.00869	-1.58372	-0.0451736	-0.365883	-0.487701
		0.376014	-0.695938	0.612934	0.193199	-0.724892	-0.458221	0.703976	-0.851135	0.853153	-1.28528	0.368687	-1.26915	1.45205	0.134621	-1.25487	-0.657028	-0.0200081	0.16349	-0.29493	0.951393	-0.955311	-2.22805	0.268814	-0.621334	0.130375	0.106415	1.2629	-1.30054	-0.77211	-0.472454	-0.71973		0.376014	-0.338024	-0.41235	-0.633461	0.212757	-0.449566	-0.00235367	0.728504	-1.07907	-1.13335	-0.908939	1.05098	-1.54285	-0.137691	-0.341419	-0.606411
		0.386254	-0.654499	0.536522	0.281033	-0.747875	-0.487808	0.701054	-0.811771	0.830765	-1.33088	0.15752	-1.17343	1.4152	0.19371	-1.37505	-0.706261	-0.0371399	0.181599	-0.253906	1.02124	-1.1015	-2.21335	0.186893	-0.616722	0.177509	0.175377	1.1792	-1.0716	-0.821442	-0.393623	-0.648811		0.386254	-0.289051	-0.279945	-0.696949	0.21965	-0.352127	-0.0613976	0.56506	-1.07408	-1.08939	-0.864559	1.12731	-1.47641	-0.209721	-0.370163	-0.760693
		0.396494	-0.660934	0.514122	0.30851	-0.867466	-0.628643	0.811131	-0.853615	0.838169	-1.29984	0.167473	-1.09629	1.5632	0.224251	-1.44498	-0.679817	-0.105885	0.0589104	-0.362259	0.961086	-1.25613	-2.21517	0.193699	-0.635319	0.0732956	0.34346	1.09775	-1.07177	-0.870815	-0.329224	-0.658554		0.396494	-0.31567	-0.301342	-0.617355	0.258751	-0.16647	-0.0718651	0.349979	-0.927586	-0.998478	-0.891979	1.1561	-1.45852	-0.313751	-0.372368	-0.801281
		0.406734	-0.622406	0.565037	0.293846	-1.00489	-0.727692	0.939842	-0.908867	0.766823	-1.2487	0.208649	-1.12778	1.53342	0.266857	-1.33514	-0.551373	-0.196903	-0.0318451	-0.498501	0.836975	-1.31384	-2.26883	0.268669	-0.662964	-0.00611877	0.492104	1.12477	-1.07065	-0.855499	-0.455692	-0.708084		0.406734	-0.387974	-0.406284	-0.615246	0.240307	-0.0676804	-0.0857544	0.350719	-0.960629	-1.04411	-1.01006	1.08293	-1.57593	-0.192802	-0.183983	-0.848202
		0.416974	-0.573593	0.679573	0.294968	-1.09355	-0.801781	1.0226	-0.965755	0.826427	-1.27323	0.230236	-1.18809	1.41855	0.0944443	-1.10643	-0.472	-0.267273	-0.234154	-0.542656	0.803871	-1.26894	-2.31914	0.281055	-0.719563	-0.0304489	0.466892	1.1255	-1.00506	-0.861446	-0.545898	-0.705914		0.416974	-0.35284	-0.591534	-0.636333	0.194912	-0.125153	0.0495605	0.433262	-1.00046	-1.09703	-1.15197	0.982983	-1.75052	-0.129002	-0.120647	-0.753613
		0.427214	-0.429729	0.728817	0.280663	-1.14338	-0.880173	1.01493	-0.933319	0.822659	-1.207	0.243195	-1.32034	1.25956	0.00823212	-1.05365	-0.384941	-0.23933	-0.33733	-0.489563	0.766476	-1.19901	-2.34238	0.254425	-0.748974	-0.0088501	0.472054	1.1522	-1.19268	-0.913982	-0.567192	-0.742725		0.427214	-0.255089	-0.58754	-0.608868	0.176617	-0.142902	0.0427322	0.518303	-0.926727	-1.06668	-1.20459	0.861652	-1.80406	-0.123863	-0.106926	-0.633293
		0.437454	-0.449028	0.806671	0.311954	-0.895588	-0.866142	1.02986	-0.822598	0.865753	-1.2342	0.227745	-1.42032	1.19193	-0.0823288	-1.02468	-0.35527	-0.267246	-0.321415	-0.406853	0.669044	-1.09691	-2.34916	0.265141	-0.862709	0.020237	0.5187	1.17734	-1.35289	-0.914936	-0.549129	-0.768379		0.437454	-0.232307	-0.536625	-0.710445	0.16201	-0.191193	-0.0699921	0.572426	-0.898605	-0.993259	-1.18291	0.806042	-1.82032	-0.104469	-0.130444	-0.475914
		0.447694	-0.559704	0.843365	0.333828	-0.799721	-0.744205	0.966915	-0.828293	1.0174	-1.1687	0.278255	-1.47467	1.26213	-0.0759506	-1.11682	-0.364582	-0.180523	-0.320606	-0.340515	0.575119	-0.999146	-2.32129	0.185772	-0.940361	-0.0845108	0.59206	1.10967	-1.43931	-0.711315	-0.605312	-0.752525		0.447694	-0.324184	-0.556976	-0.74691	0.200077	-0.242764	-0.145416	0.676067	-0.9492	-0.963707	-1.1604	0.679703	-1.71111	-0.0443878	-0.189774	-0.427753
		0.457934	-0.581127	0.842125	0.284836	-0.96225	-0.678066	0.94783	-0.664692	1.09657	-1.12919	0.286362	-1.4316	1.23224	-0.00671387	-1.17794	-0.368813	-0.123398	-0.376408	-0.44978	0.536438	-0.940197	-2.40448	0.139423	-0.909191	0.0231476	0.553352	1.08255	-1.42842	-0.536114	-0.615376	-0.77813		0.457934	-0.39373	-0.633114	-0.773209	0.286514	-0.375851	-0.25441	0.739582	-1.04067	-1.00644	-1.08119	0.536709	-1.72265	0.0135117	-0.277752	-0.462608
		0.468174	-0.601223	0.681206	0.140888	-1.09581	-0.772217	0.961788	-0.529449	1.15716	-1.05968	0.295372	-1.42633	1.19688	0.0679207	-1.25411	-0.280418	-0.16444	-0.421932	-0.586037	0.466568	-0.945454	-2.46627	0.132057	-0.901798	0.070137	0.525303	1.0585	-1.40226	-0.391285	-0.66264	-0.826649		0.468174	-0.340027	-0.709682	-0.800449	0.290936	-0.494282	-0.33688	0.723034	-1.02019	-1.13149	-1.01926	0.53038	-1.73889	-0.0724602	-0.253361	-0.376423
		0.478414	-0.675694	0.597233	-0.0258141	-1.07419	-0.837616	1.07494	-0.423542	1.12146	-0.947086	0.332481	-1.39299	1.17126	0.179596	-1.31245	-0.181202	-0.21384	-0.446312	-0.60598	0.543076	-0.973564	-2.40263	0.20562	-0.824574	0.106892	0.358162	1.04342	-1.45341	-0.435596	-0.681572	-0.700134		0.478414	-0.363976	-0.72345	-0.80772	0.29388	-0.513191	-0.3545	0.658745	-0.990791	-1.1683	-0.925976	0.505062	-1.77993	-0.173466	-0.13414	-0.280956
		0.488654	-0.738052	0.600967	-0.0778732	-1.14291	-0.746052	1.19722	-0.478939	1.06609	-0.832886	0.437195	-1.31425	1.16667	0.22282	-1.2224	-0.175087	-0.263302	-0.462154	-0.550964	0.732475	-0.967079	-2.27411	0.209114	-0.646988	-0.0180779	0.332603	1.06406	-1.33186	-0.621918	-0.680725	-0.595085		0.488654	-0.431877	-0.733929	-0.753479	0.157898	-0.486225	-0.33223	0.623161	-0.99049	-1.1183	-0.878017	0.591595	-1.8658	-0.480766	-0.103622	-0.143391
		0.498894	-0.658875	0.537617	-0.122612	-1.07537	-0.571636	1.13114	-0.544373	1.06197	-0.837688	0.500996	-1.30165	1.28073	0.255054	-1.26802	-0.12249	-0.270359	-0.406342	-0.535267	0.720699	-0.85836	-2.10704	0.107616	-0.549751	-0.0626717	0.451157	1.05156	-1.26336	-0.648193	-0.635746	-0.604717		0.498894	-0.417763	-0.778111	-0.729664	-0.0049057	-0.550072	-0.21817	0.609631	-1.09079	-1.0248	-0.959309	0.576813	-1.84818	-0.680164	-0.129131	-0.280624
		0.509134	-0.539845	0.471779	0.0265312	-1.0382	-0.523453	0.939865	-0.677338	1.01799	-0.916771	0.537712	-1.39118	1.36353	0.150913	-1.23565	-0.0644836	-0.262791	-0.304703	-0.596684	0.665661	-0.888149	-2.09052	0.096447	-0.437668	-0.0827103	0.475937	1.12332	-1.1622	-0.687721	-0.605705	-0.629452		0.509134	-0.35836	-0.852531	-0.719555	-0.121815	-0.588531	-0.229961	0.571983	-1.17294	-0.981564	-0.94101	0.640232	-1.79195	-0.713329	-0.00650406	-0.48011
		0.519374	-0.649635	0.489861	0.115128	-0.946632	-0.580269	0.831718	-0.699394	1.03975	-0.922325	0.552639	-1.53573	1.47923	0.143417	-1.20208	-0.0209274	-0.206474	-0.226631	-0.512177	0.716862	-0.916557	-2.07668	0.178715	-0.430897	-0.0738182	0.614426	1.1524	-1.14645	-0.753906	-0.55254	-0.604958		0.519374	-0.260811	-0.784306	-0.854797	-0.0321465	-0.600903	-0.196774	0.496273	-1.13398	-0.9389	-0.905926	0.73716	-1.76126	-0.734192	0.10471	-0.500519
		0.529614	-0.725021	0.570473	0.15237	-0.855774	-0.662308	0.813335	-0.601643	1.1386	-0.889091	0.502151	-1.61583	1.48341	0.185055	-1.22775	-0.0940132	-0.230339	-0.226501	-0.440697	0.74918	-0.898628	-2.12784	0.109013	-0.520638	-0.0911522	0.680538	1.12625	-1.20491	-0.753716	-0.569645	-0.547653		0.529614	-0.27607	-0.609715	-0.976521	0.112968	-0.642902	-0.221771	0.509159	-1.03785	-0.843937	-0.854595	0.800819	-1.71558	-0.768833	0.0503235	-0.499325
		0.539854	-0.770168	0.543568	0.19297	-0.77998	-0.831261	0.811954	-0.546112	1.23974	-0.983051	0.549168	-1.59074	1.42034	0.139542	-1.27297	-0.155464	-0.198654	-0.201588	-0.343826	0.600609	-0.899307	-2.22285	0.0241241	-0.570053	-0.163082	0.746033	1.07175	-1.22422	-0.733952	-0.651234	-0.541523		0.539854	-0.319141	-0.453571	-0.99601	0.195187	-0.740902	-0.263351	0.568645	-1.01553	-0.912266	-0.951225	0.866528	-1.67508	-0.80164	-0.039978	-0.491398
		0.550094	-0.815609	0.577969	0.24485	-0.792889	-0.837891	0.814159	-0.558189	1.21518	-0.977329	0.678894	-1.63758	1.26459	0.16013	-1.43303	-0.169521	-0.104206	-0.221149	-0.325649	0.428219	-0.795322	-2.18009	-0.117867	-0.428074	-0.124863	0.809975	0.962921	-1.14985	-0.769955	-0.698116	-0.611118		0.550094	-0.332779	-0.326626	-0.977272	0.172405	-0.856964	-0.216526	0.53796	-1.01575	-1.08805	-1.10624	0.872307	-1.60611	-0.849918	-0.175709	-0.559097
		0.560334	-0.756901	0.539371	0.224659	-0.757782	-0.798801	0.846989	-0.743595	1.17974	-0.95554	0.54681	-1.66253	1.29227	0.141747	-1.53959	-0.1828	-0.0695381	-0.241272	-0.402695	0.347694	-0.65258	-2.20746	-0.126675	-0.376575	0.0226097	0.696167	1.0045	-1.12141	-0.781097	-0.699917	-0.658455		0.560334	-0.338749	-0.249866	-0.974865	0.200375	-0.731853	-0.253563	0.466187	-1.1285	-1.2618	-1.1309	0.775688	-1.66625	-0.784473	-0.17535	-0.638454
		0.570574	-0.63905	0.525959	0.0776253	-0.760834	-0.792351	0.84259	-0.842148	1.07232	-0.972515	0.366566	-1.59219	1.27771	0.199348	-1.53305	-0.287441	-0.113255	-0.142124	-0.490181	0.377186	-0.691238	-2.21527	-0.0745697	-0.319901	0.173756	0.645325	1.15221	-1.23667	-0.719063	-0.708023	-0.680153		0.570574	-0.438984	-0.299603	-1.01386	0.193935	-0.511986	-0.278492	0.370319	-1.22309	-1.18297	-1.02964	0.781303	-1.65184	-0.654308	-0.21624	-0.641232
		0.580814	-0.564259	0.5704	-0.0830688	-0.719612	-0.716618	0.809341	-0.875095	0.981636	-1.01679	0.276047	-1.54173	1.31084	0.275475	-1.52552	-0.298336	-0.0772858	-0.134697	-0.531189	0.39484	-0.748661	-2.18083	0.0625801	-0.303581	0.108189	0.713581	1.15408	-1.34673	-0.712051	-0.671856	-0.670582		0.580814	-0.473816	-0.332539	-0.976997	0.151497	-0.371353	-0.303978	0.287182	-1.29348	-1.16212	-0.986809	0.731415	-1.62886	-0.512783	-0.262482	-0.526279
		0.591054	-0.51749	0.632877	-0.146549	-0.564423	-0.642662	0.792572	-0.94363	1.01759	-1.05728	0.199673	-1.50782	1.2142	0.259907	-1.49923	-0.377708	-0.110023	-0.139919	-0.600212	0.463146	-0.740841	-2.09241	0.118679	-0.298637	0.114674	0.77227	1.15616	-1.39983	-0.773376	-0.668198	-0.666016		0.591054	-0.388748	-0.416035	-0.890629	0.0974007	-0.294132	-0.309795	0.203972	-1.50982	-1.20826	-1.02717	0.727493	-1.61262	-0.382168	-0.314266	-0.571136
		0.601294	-0.509815	0.633404	-0.0782661	-0.550217	-0.619438	0.693867	-0.901226	1.08904	-1.02794	0.114403	-1.46597	1.08972	0.187798	-1.35627	-0.469437	-0.0924034	-0.168758	-0.689308	0.51944	-0.631779	-1.95802	0.194439	-0.341183	0.206837	0.731499	1.10454	-1.37352	-0.827805	-0.693504	-0.728184		0.601294	-0.45871	-0.447456	-0.80592	-0.0139999	-0.233631	-0.339405	0.179367	-1.58372	-1.16385	-1.03864	0.785393	-1.55229	-0.368744	-0.422482	-0.640301
		0.611534	-0.550549	0.55476	0.0416489	-0.667637	-0.48851	0.632736	-0.833717	1.1507	-1.08326	0.159367	-1.50372	0.94952	0.161896	-1.23526	-0.674812	-0.0343361	-0.223309	-0.72979	0.53421	-0.501602	-1.96502	0.152954	-0.500816	0.155922	0.75304	1.03961	-1.46467	-0.824776	-0.661652	-0.752132		0.611534	-0.437157	-0.452847	-0.633518	-0.0751686	-0.212376	-0.274078	0.0489769	-1.63525	-1.2029	-1.08343	0.718136	-1.54071	-0.392574	-0.457554	-0.763268
		0.621774	-0.517776	0.592228	0.119156	-0.680225	-0.451523	0.636562	-0.714306	1.18287	-1.10224	0.197121	-1.67659	0.927586	0.163132	-1.19318	-0.792282	-0.103214	-0.252693	-0.680058	0.504513	-0.504532	-2.2278	0.166912	-0.547546	-0.0223083	0.758595	1.04745	-1.39759	-0.907593	-0.70763	-0.682812		0.621774	-0.418549	-0.527767	-0.514477	-0.0900192	-0.240368	-0.239902	-0.0412407	-1.59424	-1.21415	-1.03493	0.655933	-1.53703	-0.51543	-0.389332	-0.947742
		0.632014	-0.56731	0.551933	0.024292	-0.637917	-0.552597	0.644276	-0.60815	1.13408	-1.15807	0.18644	-1.71466	0.998241	0.214348	-1.19756	-0.89653	-0.14159	-0.13023	-0.620144	0.408382	-0.590698	-2.05337	0.15163	-0.523666	-0.124889	0.729725	1.04355	-1.44359	-0.83403	-0.662178	-0.573948		0.632014	-0.404686	-0.531441	-0.49773	-0.0365791	-0.254959	-0.20134	-0.104626	-1.55748	-1.20582	-1.03479	0.539333	-1.60968	-0.685818	-0.250214	-1.03424
		0.642254	-0.548416	0.595516	-0.0263367	-0.613525	-0.43531	0.686832	-0.499813	1.0458	-1.16563	0.133831	-1.69509	1.00865	0.269791	-1.18493	-0.845509	-0.146347	-0.0673561	-0.566319	0.376579	-0.681286	-1.69595	0.0331841	-0.603607	-0.0243454	0.741821	0.992165	-1.45841	-0.652485	-0.656967	-0.50742		0.642254	-0.327091	-0.498112	-0.547474	-0.00886154	-0.241333	-0.206928	-0.0234642	-1.45505	-1.2909	-1.05738	0.427895	-1.70595	-0.61694	-0.196152	-1.00428
		0.652494	-0.460663	0.653072	-0.0444565	-0.768452	-0.444511	0.698669	-0.482315	1.07694	-0.971832	0.124664	-1.73426	1.12149	0.368126	-1.17538	-0.815239	-0.0378647	-0.139599	-0.612396	0.408024	-0.848236	-1.7994	-0.223331	-0.787964	-0.043087	0.747307	1.12461	-1.48715	-0.418678	-0.600487	-0.528435		0.652494	-0.316067	-0.450592	-0.629097	0.0194969	-0.242512	-0.161892	0.0585518	-1.31607	-1.34751	-1.06898	0.283154	-1.7473	-0.516502	-0.224178	-0.91074
		0.662735	-0.357109	0.706467	-0.118881	-0.92453	-0.424793	0.73666	-0.496475	1.16837	-0.807076	0.103016	-1.83254	1.10671	0.258823	-1.24326	-0.786644	0.0378571	-0.10677	-0.581329	0.441143	-0.92794	-2.00645	-0.378124	-0.909916	-0.0466499	0.655899	1.09169	-1.51299	-0.176876	-0.485519	-0.568146		0.662735	-0.286739	-0.433735	-0.710972	-0.01157	-0.441711	-0.104862	0.145393	-1.25592	-1.44691	-1.16386	0.145359	-1.79589	-0.486618	-0.136951	-0.874561
		0.672975	-0.291721	0.691505	-0.0402031	-0.985935	-0.448421	0.829193	-0.63979	1.17889	-0.731316	0.122341	-1.83598	1.05545	0.205574	-1.29676	-0.783161	0.0603981	-0.160973	-0.522369	0.393757	-1.00226	-2.29061	-0.37748	-0.908211	-0.0440407	0.543709	1.13269	-1.48055	-0.202099	-0.481037	-0.545853		0.672975	-0.273617	-0.467712	-0.778286	-0.123699	-0.60051	-0.0193405	0.199814	-1.24675	-1.51759	-1.23567	0.0752258	-1.6308	-0.465649	-0.0804138	-0.855011
		0.683215	-0.179272	0.677975	-0.00826645	-1.0233	-0.504807	0.885422	-0.708561	1.34526	-0.868862	0.152069	-1.79959	0.834007	0.117546	-1.26437	-0.827209	0.0536766	-0.150135	-0.442318	0.350208	-1.04335	-2.47617	-0.399761	-0.912205	-0.026947	0.556526	1.13057	-1.51126	-0.286392	-0.553089	-0.517693		0.683215	-0.340824	-0.417835	-0.711018	-0.228958	-0.744324	-0.123318	0.2719	-1.21557	-1.64169	-1.21474	-0.0387726	-1.53923	-0.526577	-0.00551224	-0.937111
		0.693455	-0.244324	0.603065	-0.00987625	-1.12949	-0.525883	0.89645	-0.647011	1.33814	-1.07283	0.184471	-1.83035	0.759071	0.083313	-1.17741	-0.710789	-0.0494881	-0.102798	-0.426952	0.427338	-1.04862	-2.54355	-0.508026	-0.905983	0.0127029	0.644596	1.19625	-1.56195	-0.304798	-0.660507	-0.570435		0.693455	-0.401409	-0.426178	-0.592869	-0.299221	-0.879711	-0.174088	0.322933	-1.21048	-1.68285	-1.10456	-0.137466	-1.54847	-0.497551	0.142666	-0.843624
		0.703695	-0.281624	0.552246	-0.143295	-1.09058	-0.512367	0.924164	-0.700325	1.16248	-1.10947	0.191006	-1.67712	0.71909	0.0693398	-1.12537	-0.602154	-0.108902	-0.220516	-0.340202	0.505348	-1.08822	-2.50416	-0.551418	-0.932888	0.057373	0.781639	1.21505	-1.53567	-0.369648	-0.65649	-0.564175		0.703695	-0.364037	-0.510651	-0.575741	-0.360031	-0.894184	-0.321812	0.265999	-1.24186	-1.62214	-1.06512	-0.0905228	-1.52378	-0.42823	0.218388	-0.709908
		0.713935	-0.32975	0.511177	-0.203743	-1.07724	-0.571125	0.991375	-0.695473	1.20573	-1.09115	0.292618	-1.60554	0.65852	0.0334473	-1.14795	-0.53883	-0.0763702	-0.316006	-0.378399	0.520668	-1.1375	-2.45499	-0.581532	-0.857632	0.00870895	0.767536	1.2084	-1.52129	-0.409119	-0.630062	-0.518635		0.713935	-0.275928	-0.497906	-0.537426	-0.527222	-0.900787	-0.434677	0.0990448	-1.37917	-1.54467	-1.04732	0.137501	-1.60426	-0.52182	0.27916	-0.689857
		0.724175	-0.307838	0.456089	-0.225048	-1.13098	-0.402275	0.719315	-0.648621	1.26851	-1.12505	0.26688	-1.51042	0.82769	0.0506248	-1.16864	-0.4916	-0.0333939	-0.484196	-0.383881	0.443169	-1.21416	-2.40667	-0.5117	-0.716904	-0.0620766	0.800926	1.16544	-1.4219	-0.432484	-0.627712	-0.42215		0.724175	-0.116341	-0.378914	-0.551456	-0.529652	-0.849239	-0.518208	0.0132751	-1.41266	-1.51909	-1.09541	0.2757	-1.6749	-0.540298	0.28133	-0.826187
		0.734415	-0.411823	0.411076	-0.265282	-1.09866	-0.200062	0.566074	-0.563339	1.24389	-1.01336	0.18079	-1.62676	0.962051	0.0214424	-1.12524	-0.362759	0.0106163	-0.463669	-0.424114	0.404842	-1.28828	-2.42884	-0.477379	-0.674931	-0.133759	0.864048	1.13425	-1.36882	-0.404137	-0.507	-0.361374		0.734415	-0.103207	-0.452988	-0.536983	-0.508995	-0.736065	-0.608128	-0.0698624	-1.34665	-1.51076	-1.21799	0.28611	-1.73104	-0.552742	0.218517	-0.947433
		0.744655	-0.320747	0.427719	-0.256031	-1.05782	-0.176125	0.408882	-0.549488	1.19153	-0.91198	0.0716171	-1.87951	1.07026	0.0174713	-1.2111	-0.271851	-0.0791473	-0.369862	-0.522392	0.372536	-1.32199	-2.37617	-0.578957	-0.640862	-0.166874	0.790649	0.991615	-1.40771	-0.389973	-0.452023	-0.364891		0.744655	-0.171547	-0.43972	-0.385994	-0.457912	-0.74461	-0.562519	-0.0811882	-1.35612	-1.41895	-1.32534	0.285454	-1.81729	-0.530846	0.134296	-1.00971
		0.754895	-0.275749	0.377426	-0.273422	-1.11161	-0.348118	0.309891	-0.602692	1.19418	-0.897697	0.0660858	-1.94833	1.03235	-0.0309258	-1.27847	-0.213974	-0.0773964	-0.205532	-0.645893	0.238628	-1.27992	-2.5141	-0.655323	-0.741306	-0.103786	0.625977	0.874836	-1.50358	-0.410107	-0.558594	-0.467876		0.754895	-0.240307	-0.442417	-0.286655	-0.323288	-0.791733	-0.626678	-0.0925102	-1.38187	-1.43232	-1.32323	0.323467	-1.84991	-0.500912	0.106136	-1.06034
		0.765135	-0.174252	0.426849	-0.243309	-1.08403	-0.58432	0.32999	-0.627701	1.09587	-0.832241	0.0520782	-1.90721	0.986477	-0.0391159	-1.25856	-0.157253	-0.180153	-0.229481	-0.670414	0.272354	-1.20806	-2.55443	-0.717026	-0.800339	-0.0672264	0.525124	0.818951	-1.46743	-0.463501	-0.548546	-0.534668		0.765135	-0.32745	-0.559311	-0.291149	-0.293152	-0.732559	-0.663895	-0.0314903	-1.34031	-1.45853	-1.22946	0.32589	-1.78119	-0.475842	0.131493	-0.979336
		0.775375	-0.106102	0.567551	-0.126034	-1.06913	-0.718346	0.352474	-0.614086	0.976929	-0.872913	0.16869	-1.91155	0.961658	-0.0533371	-1.30376	-0.176064	-0.282875	-0.255936	-0.741402	0.239857	-1.17545	-2.39828	-0.714485	-0.8032	-0.0200539	0.507599	0.665302	-1.36337	-0.424557	-0.557762	-0.589722		0.775375	-0.421841	-0.549274	-0.330849	-0.371891	-0.558655	-0.666149	0.098938	-1.3632	-1.45763	-1.15155	0.250633	-1.76461	-0.467854	0.104481	-0.967281
		0.785615	-0.106506	0.724453	-0.00464249	-1.08065	-0.71954	0.328621	-0.673813	0.969929	-0.789349	0.0594711	-1.91936	0.99786	0.049015	-1.29819	-0.303715	-0.303036	-0.344986	-0.830666	0.19017	-1.09121	-2.32696	-0.681274	-0.665718	-0.00330734	0.701973	0.601788	-1.35494	-0.394695	-0.53001	-0.480026		0.785615	-0.472935	-0.527699	-0.417522	-0.411289	-0.466759	-0.600056	0.113625	-1.34184	-1.62074	-1.07741	0.198563	-1.69572	-0.532333	0.218781	-1.03893
		0.795855	-0.11491	0.734993	-0.0481529	-1.07339	-0.737492	0.235291	-0.670841	1.04435	-0.699894	0.0773735	-1.93849	1.09627	0.0454865	-1.20297	-0.428288	-0.370041	-0.368347	-0.83099	0.098774	-1.14227	-2.33871	-0.704842	-0.607841	-0.035862	0.755352	0.57468	-1.34267	-0.395767	-0.464241	-0.421314		0.795855	-0.361042	-0.451809	-0.473194	-0.382774	-0.464813	-0.530453	0.0537682	-1.40005	-1.72139	-1.16922	0.187607	-1.66975	-0.572781	0.285656	-1.06972
		0.806095	-0.273148	0.662991	-0.0522881	-1.05891	-0.806908	0.162228	-0.679104	1.0322	-0.64463	0.113281	-1.96466	1.2252	0.0155182	-1.22984	-0.53672	-0.407722	-0.426605	-0.634041	0.0125732	-1.04722	-2.44087	-0.707775	-0.642639	-0.0431595	0.681957	0.531025	-1.32213	-0.447041	-0.318783	-0.41497		0.806095	-0.23616	-0.472172	-0.456589	-0.303036	-0.600616	-0.452717	0.00790787	-1.37084	-1.58048	-1.13214	0.241344	-1.67329	-0.694675	0.378712	-1.09175
		0.816335	-0.347393	0.561924	-0.036911	-1.17692	-0.843494	0.113304	-0.72506	1.01221	-0.663452	0.132423	-1.93767	1.18196	-0.0452194	-1.34077	-0.539413	-0.429932	-0.483219	-0.427345	0.107346	-0.977283	-2.45142	-0.706902	-0.663429	-0.108486	0.574883	0.490532	-1.30388	-0.542847	-0.259247	-0.457863		0.816335	-0.16523	-0.545712	-0.426205	-0.259453	-0.681252	-0.455372	-0.078495	-1.32392	-1.41163	-1.14466	0.211315	-1.73271	-0.725822	0.475986	-1.06357
		0.826575	-0.332588	0.564438	-0.097374	-1.15182	-0.821644	0.180298	-0.662285	1.10297	-0.807098	0.156387	-1.96871	1.11732	-0.0929031	-1.43334	-0.493103	-0.537937	-0.382381	-0.451878	0.189098	-0.907654	-2.40528	-0.755432	-0.658836	-0.226562	0.380047	0.457951	-1.33911	-0.606159	-0.395039	-0.482803		0.826575	-0.069458	-0.542671	-0.439064	-0.23505	-0.725239	-0.463516	-0.127022	-1.23296	-1.37493	-1.13403	0.0488586	-1.86692	-0.787216	0.45702	-1.01274
		0.836815	-0.384132	0.586147	-0.155273	-1.19948	-0.699154	0.312847	-0.618271	1.17598	-0.795036	0.205967	-1.95691	1.10106	-0.159985	-1.51526	-0.564747	-0.600498	-0.240055	-0.431328	0.333855	-0.84148	-2.34131	-0.666645	-0.572163	-0.260799	0.412113	0.558777	-1.36301	-0.705078	-0.539902	-0.49662		0.836815	-0.0954933	-0.485462	-0.511532	-0.337009	-0.750511	-0.474686	-0.115017	-1.08855	-1.33695	-1.16117	0.013752	-1.89152	-0.81443	0.45145	-0.944931
		0.847055	-0.452404	0.572308	-0.154964	-1.30337	-0.570026	0.484879	-0.476841	1.06191	-0.688629	0.243946	-1.90114	0.948067	-0.263992	-1.40956	-0.551933	-0.564091	-0.147144	-0.476795	0.451405	-0.929695	-2.31678	-0.591877	-0.578621	-0.124638	0.522621	0.644714	-1.31647	-0.781467	-0.598877	-0.471226		0.847055	-0.142532	-0.417728	-0.677937	-0.356441	-0.784512	-0.456734	-0.10107	-1.02155	-1.39425	-1.24398	-0.0263519	-1.88442	-0.821453	0.36034	-0.886505
		0.857295	-0.455978	0.514465	-0.17318	-1.18465	-0.522583	0.545128	-0.506943	0.994354	-0.704712	0.249989	-1.86484	0.977524	-0.215118	-1.31335	-0.561291	-0.444118	-0.182121	-0.539345	0.465065	-0.868633	-2.36053	-0.535217	-0.604931	-0.12825	0.635963	0.794098	-1.24057	-0.720684	-0.691025	-0.559013		0.857295	-0.17112	-0.573711	-0.730709	-0.287956	-0.782986	-0.403923	-0.0419655	-0.97192	-1.48823	-1.30765	-0.160439	-1.95279	-0.66132	0.325733	-0.76825
		0.867535	-0.418621	0.421661	-0.112682	-1.05175	-0.529247	0.377342	-0.548882	0.930149	-0.699905	0.164864	-1.83771	0.858494	-0.166195	-1.33398	-0.488308	-0.376419	-0.200119	-0.530998	0.421471	-0.822929	-2.45621	-0.588554	-0.679234	-0.166195	0.763115	0.966057	-1.32487	-0.658028	-0.65749	-0.485817		0.867535	-0.203186	-0.716228	-0.716812	-0.168495	-0.72884	-0.469379	-0.0589905	-1.05807	-1.54917	-1.32332	-0.199883	-2.0783	-0.607235	0.342541	-0.823574
		0.877775	-0.44767	0.421234	-0.0772629	-1.09667	-0.488297	0.376007	-0.531441	0.926525	-0.657516	0.132423	-1.95855	0.786968	-0.0171928	-1.36982	-0.334244	-0.440746	-0.185432	-0.513676	0.464222	-0.912014	-2.52547	-0.673321	-0.789337	-0.243679	0.876961	1.0272	-1.32996	-0.661045	-0.786903	-0.354748		0.877775	-0.207932	-0.63303	-0.660294	0.0285225	-0.616783	-0.561111	-0.0765038	-1.02473	-1.53476	-1.21198	-0.12167	-2.14311	-0.567013	0.465591	-0.830429
		0.888015	-0.465744	0.433716	-0.0560913	-1.05478	-0.413387	0.441605	-0.43457	0.879845	-0.647026	0.199944	-1.99354	0.781544	0.0442238	-1.42662	-0.260201	-0.493267	-0.159554	-0.514977	0.329777	-0.974277	-2.49987	-0.81926	-0.704483	-0.272316	0.898022	1.02662	-1.33039	-0.608341	-0.932495	-0.277927		0.888015	-0.205379	-0.568802	-0.500946	0.089901	-0.608139	-0.540428	-0.0573082	-0.933079	-1.51498	-1.1039	-0.0192947	-2.13722	-0.643833	0.440605	-0.84774
		0.898255	-0.442749	0.483841	-0.127941	-1.09504	-0.386837	0.508816	-0.500145	0.881596	-0.578396	0.210926	-1.85266	0.845715	0.151497	-1.44444	-0.336639	-0.582642	-0.19812	-0.654465	0.312717	-0.888878	-2.51239	-0.786655	-0.731926	-0.325947	0.837013	0.966652	-1.41346	-0.549927	-0.897102	-0.179771		0.898255	-0.0630569	-0.546627	-0.406487	0.232738	-0.536007	-0.469131	0.0482025	-0.97533	-1.50334	-1.14915	-0.0732002	-2.1578	-0.857586	0.513596	-0.835056
		0.908495	-0.388317	0.601501	-0.168423	-1.08826	-0.355141	0.59399	-0.529316	0.89497	-0.557343	0.168106	-1.80691	0.83725	0.208778	-1.42475	-0.358658	-0.539402	-0.318115	-0.792686	0.343174	-0.924831	-2.44876	-0.855999	-0.886112	-0.365665	0.745911	0.951965	-1.50935	-0.457851	-0.797169	-0.0524216		0.908495	-0.0491562	-0.412182	-0.417751	0.24757	-0.536449	-0.387363	-0.0517921	-0.952644	-1.63475	-1.26418	-0.0690498	-2.24057	-0.827686	0.660259	-0.727184
		0.918735	-0.301044	0.55867	-0.0810089	-1.13619	-0.349194	0.624058	-0.535049	0.877888	-0.63105	0.173122	-1.79449	0.808746	0.133556	-1.45235	-0.376659	-0.466564	-0.327316	-0.792221	0.303085	-1.01619	-2.41092	-0.886112	-0.900787	-0.344006	0.624519	1.00027	-1.55311	-0.289337	-0.596085	-0.0728645		0.918735	-0.0520287	-0.321598	-0.399952	0.126057	-0.546413	-0.331573	-0.0549011	-0.786667	-1.64495	-1.23621	-0.0561638	-2.27727	-0.796074	0.629894	-0.684601
		0.928975	-0.146309	0.571999	0.121349	-1.10276	-0.352818	0.506397	-0.523952	0.873848	-0.657612	0.0941124	-1.76661	0.789471	0.10881	-1.40525	-0.292091	-0.351063	-0.298397	-0.683323	0.241432	-1.03302	-2.46777	-0.846783	-0.910442	-0.398499	0.608025	1.08852	-1.60187	-0.278526	-0.440018	-0.0337753		0.928975	-0.103085	-0.390739	-0.439781	0.0304146	-0.608891	-0.320786	0.0252914	-0.783939	-1.44878	-1.19693	-0.140209	-2.39799	-0.809116	0.530071	-0.653751
		0.939215	-0.133114	0.646172	0.204571	-0.926929	-0.384586	0.478825	-0.562256	0.89893	-0.604313	0.138683	-1.74195	0.850185	0.104279	-1.55461	-0.270813	-0.304821	-0.243286	-0.684074	0.0945892	-1.08668	-2.46122	-0.787918	-0.803879	-0.385635	0.623077	1.06674	-1.72806	-0.355629	-0.364532	-0.0544586		0.939215	-0.171474	-0.387196	-0.441986	-0.0676079	-0.575405	-0.257786	0.0789948	-0.823372	-1.4131	-1.18917	-0.132542	-2.28849	-0.808197	0.50816	-0.63129
		0.949455	-0.202969	0.726921	0.222107	-0.744217	-0.464005	0.425442	-0.581127	0.991638	-0.583797	0.194714	-1.70724	0.876389	0.071579	-1.6115	-0.345558	-0.274494	-0.291279	-0.509457	0.0344963	-1.05721	-2.42183	-0.694733	-0.604084	-0.288288	0.674469	1.04346	-1.74864	-0.409107	-0.334446	-0.168709		0.949455	-0.132603	-0.433163	-0.496094	-0.224117	-0.598614	-0.366825	0.0260887	-0.982445	-1.35598	-1.26603	-0.0206528	-2.23153	-0.748676	0.560993	-0.730652
		0.959695	-0.229542	0.670609	0.272209	-0.714546	-0.658768	0.467915	-0.583069	1.07771	-0.608891	0.153763	-1.7155	0.908012	-0.0260162	-1.54652	-0.378494	-0.352314	-0.359371	-0.434891	0.0557022	-1.04895	-2.29556	-0.679153	-0.518993	-0.240307	0.538811	1.01832	-1.76688	-0.454227	-0.327557	-0.316006		0.959695	-0.105659	-0.533897	-0.579147	-0.300091	-0.569515	-0.602562	0.00680161	-1.03138	-1.28757	-1.29789	0.0883636	-2.04063	-0.643986	0.590603	-0.821548
		0.969935	-0.23859	0.626678	0.384399	-0.668114	-0.828091	0.513321	-0.567726	1.13607	-0.646095	0.124165	-1.68825	0.930138	-0.0870514	-1.49186	-0.486843	-0.352352	-0.411716	-0.404194	0.0589676	-1.00743	-2.14508	-0.753742	-0.511936	-0.222328	0.447495	0.989803	-1.7118	-0.482063	-0.410309	-0.479286		0.969935	-0.0500603	-0.582344	-0.580376	-0.255924	-0.516979	-0.797493	-0.0123558	-1.06948	-1.27972	-1.22005	0.213318	-1.88186	-0.591999	0.599998	-0.939362
		0.980175	-0.369373	0.521061	0.400814	-0.64098	-0.906971	0.530762	-0.548832	1.17723	-0.46566	0.0155029	-1.68724	0.832577	-0.0967903	-1.40351	-0.530449	-0.323776	-0.449543	-0.341835	0.110859	-0.942593	-2.19316	-0.818699	-0.433186	-0.217384	0.415749	1.06418	-1.69888	-0.62373	-0.535862	-0.636665		0.980175	-0.116379	-0.451355	-0.557156	-0.225822	-0.371807	-0.871593	-0.0480843	-1.11976	-1.27658	-1.14625	0.254471	-1.84406	-1.04709	0.510998	-1.147
		0.990415	-0.284676	0.553745	0.392586	-0.686985	-0.89666	0.524673	-0.530926	1.08429	-0.263611	-0.0208282	-1.68993	0.696667	-0.0983276	-1.3839	-0.423973	-0.308983	-0.530975	-0.403351	0.0160751	-0.871578	-2.33243	-0.875393	-0.39603	-0.277393	0.340122	1.1974	-1.50834	-0.670425	-0.575188	-0.77216		0.990415	-0.171764	-0.330204	-0.615448	-0.107796	-0.329823	-0.873547	-0.124889	-1.10622	-1.37149	-1.1692	0.246925	-1.78956	-1.21907	0.526638	-1.27193
		1.00066	-0.227848	0.618954	0.322029	-0.758736	-0.806442	0.443192	-0.541264	1.01514	-0.211182	-0.0468063	-1.75034	0.669678	0.0309067	-1.30701	-0.537163	-0.297455	-0.524345	-0.554256	0.0734177	-0.92173	-2.47215	-0.931946	-0.385159	-0.302845	0.306042	1.27383	-1.3776	-0.747696	-0.627998	-0.827816		1.00066	-0.19508	-0.179035	-0.510651	-0.0115204	-0.407604	-0.969727	-0.101799	-1.13503	-1.52339	-1.24033	0.290783	-1.85465	-1.16079	0.628166	-1.28421
		1.0109	-0.211945	0.701485	0.30286	-0.790516	-0.663212	0.443539	-0.529247	0.979004	-0.246601	-0.0612526	-1.81727	0.672623	0.117466	-1.26868	-0.610809	-0.373188	-0.563995	-0.656372	0.124737	-0.962036	-2.49915	-0.943222	-0.377014	-0.404385	0.260563	1.14804	-1.32915	-0.753922	-0.532917	-0.806313		1.0109	-0.236195	-0.169476	-0.410492	-0.0355644	-0.407475	-1.05561	-0.0549507	-1.20342	-1.61291	-1.16709	0.286789	-1.78309	-1.08053	0.626736	-1.12898
		1.02114	-0.236839	0.770279	0.286743	-0.798969	-0.651222	0.363739	-0.474014	1.02417	-0.169029	-0.128834	-1.84073	0.664764	0.159153	-1.2225	-0.607304	-0.316185	-0.705009	-0.624245	0.078949	-0.934486	-2.57187	-0.905472	-0.379555	-0.598244	0.261051	1.02243	-1.21022	-0.69825	-0.361019	-0.720852		1.02114	-0.245613	-0.0945168	-0.463001	-0.0126648	-0.423199	-0.943977	-0.0936699	-1.16492	-1.65715	-1.05072	0.275345	-1.77917	-0.87785	0.68317	-0.921062
		1.03138	-0.32666	0.798256	0.280186	-0.74226	-0.729397	0.243431	-0.380638	1.08788	-0.233513	-0.0998764	-1.81609	0.720901	0.138672	-1.19648	-0.592045	-0.161236	-0.759342	-0.455669	0.0527954	-0.830345	-2.5275	-0.785725	-0.405411	-0.726944	0.27153	0.879189	-1.14266	-0.650196	-0.472206	-0.651482		1.03138	-0.205643	-0.125916	-0.573845	0.0150261	-0.375015	-0.726192	-0.0418739	-1.16325	-1.60189	-0.994175	0.326939	-1.57644	-0.733681	0.734299	-0.771183
		1.04162	-0.36414	0.756306	0.175461	-0.70385	-0.757053	0.225658	-0.279633	1.11803	-0.249153	-0.0674896	-1.73592	0.813873	0.0393829	-1.24129	-0.565067	-0.0224266	-0.670639	-0.449234	0.11409	-0.769894	-2.47695	-0.817802	-0.446896	-0.832073	0.286552	0.861496	-1.1861	-0.560966	-0.540928	-0.599449		1.04162	-0.183815	-0.173824	-0.6329	-0.0212135	-0.416607	-0.662273	-0.0340538	-1.22335	-1.46537	-0.993473	0.328262	-1.53836	-0.493816	0.829784	-0.604015
		1.05186	-0.518089	0.666756	0.0434494	-0.587872	-0.687496	0.161583	-0.21978	1.12601	-0.291401	-0.0812683	-1.77334	0.872345	-0.0455437	-1.41348	-0.62888	0.0598526	-0.474876	-0.4417	0.118229	-0.774628	-2.53495	-0.891212	-0.49868	-0.814823	0.162811	0.907787	-1.18267	-0.524658	-0.521557	-0.510876		1.05186	-0.158852	-0.168961	-0.809364	-0.139503	-0.378639	-0.692753	-0.11359	-1.2567	-1.41905	-1.04445	0.299732	-1.5685	-0.374977	0.865799	-0.468151
		1.0621	-0.545197	0.565453	0.0152893	-0.629215	-0.794167	0.162834	-0.221851	1.07822	-0.364594	-0.0592995	-1.69529	0.743397	-0.096241	-1.50517	-0.618652	0.0187607	-0.443008	-0.512722	0.130112	-0.689083	-2.48516	-0.896004	-0.656109	-0.802628	0.169666	0.976463	-1.27527	-0.51878	-0.529057	-0.459019		1.0621	-0.131935	-0.0917358	-0.901634	-0.0601234	-0.348587	-0.689655	-0.105972	-1.20284	-1.48251	-1.06596	0.318272	-1.57695	-0.27092	0.800426	-0.317005
		1.07234	-0.554649	0.514919	-0.0716362	-0.644222	-0.803345	0.244064	-0.376598	1.12172	-0.479118	-0.149994	-1.71049	0.677437	-0.0765381	-1.61317	-0.533012	-0.0981979	-0.454659	-0.635269	0.200424	-0.678127	-2.28844	-0.84832	-0.651615	-0.795868	0.168381	0.881203	-1.38455	-0.457054	-0.571888	-0.574188		1.07234	-0.147778	-0.0743217	-0.801571	0.062542	-0.264065	-0.750298	-0.102921	-1.12396	-1.50511	-1.11341	0.200981	-1.64673	-0.205166	0.872749	-0.143604
		1.08258	-0.574223	0.584442	-0.0645561	-0.605671	-0.714664	0.33395	-0.408474	1.11108	-0.452999	-0.216141	-1.70971	0.585979	-0.108116	-1.73141	-0.471142	-0.278847	-0.469929	-0.650948	0.223347	-0.730854	-2.32263	-0.916222	-0.606876	-0.800209	0.177437	0.813313	-1.42585	-0.41024	-0.658173	-0.700157		1.08258	-0.122292	-0.142555	-0.720127	0.052578	-0.243313	-0.813229	-0.0586433	-1.05959	-1.5068	-1.18939	0.0955276	-1.73705	-0.195415	0.922962	-0.0889969
		1.09282	-0.576679	0.632378	-0.0468292	-0.710503	-0.690845	0.33284	-0.37468	1.00098	-0.451927	-0.140694	-1.68765	0.645847	-0.124767	-1.76311	-0.513809	-0.263386	-0.422363	-0.589027	0.284286	-0.719147	-2.2914	-0.759583	-0.601475	-0.796822	0.18166	0.712818	-1.40412	-0.409382	-0.674706	-0.785809		1.09282	-0.131397	-0.13055	-0.665359	0.112255	-0.321503	-0.813419	0.00434494	-1.11388	-1.41047	-1.13525	0.0699463	-1.76876	-0.298504	0.954636	-0.14196
		1.10306	-0.540821	0.721474	0.0627594	-0.768177	-0.746956	0.294884	-0.402325	0.997192	-0.51178	-0.144833	-1.68521	0.661095	-0.150089	-1.72297	-0.571518	-0.224201	-0.295704	-0.524036	0.149044	-0.714939	-2.34378	-0.305965	-0.679794	-0.758522	0.194332	0.565144	-1.47502	-0.536102	-0.647083	-0.795609		1.10306	-0.187523	-0.0988541	-0.603588	-0.0271873	-0.335472	-0.715096	0.184269	-1.15807	-1.37176	-1.06217	0.00911331	-1.7961	-0.382835	1.04258	-0.0823555
		1.1133	-0.460926	0.661369	0.0826912	-0.810829	-0.855152	0.235649	-0.505013	1.05098	-0.518528	-0.199978	-1.74653	0.637432	-0.205475	-1.73981	-0.675789	-0.185482	-0.25528	-0.437611	0.00708771	-0.684338	-2.44041	-0.303715	-0.670853	-0.667435	0.274094	0.435837	-1.5148	-0.594788	-0.652973	-0.810867		1.1133	-0.161011	-0.148983	-0.548557	-0.0659409	-0.436348	-0.709431	0.233013	-1.20229	-1.22781	-0.972588	0.0346489	-1.79158	-0.289829	1.00222	-0.145012
		1.12354	-0.475494	0.646313	0.0845757	-0.947884	-0.957924	0.24564	-0.596577	1.12511	-0.561279	-0.187164	-1.72826	0.700779	-0.287857	-1.69586	-0.731304	-0.199047	-0.247089	-0.513187	-0.0113182	-0.740913	-2.59959	-0.497833	-0.687019	-0.575417	0.26619	0.448761	-1.58979	-0.544434	-0.788063	-0.800579		1.12354	-0.216419	-0.164433	-0.413364	-0.510113	-0.43549	-0.811344	0.2173	-1.23524	-1.2471	-1.05782	0.117046	-1.76726	-0.271435	1.0142	-0.379353
		1.13378	-0.535217	0.651176	-0.0705528	-1.067	-0.856522	0.291046	-0.69392	1.19234	-0.464005	-0.223225	-1.63893	0.769478	-0.265377	-1.5905	-0.723068	-0.180092	-0.275093	-0.616173	0.107677	-0.656143	-2.68327	-0.750118	-0.569992	-0.604492	0.327225	0.476082	-1.58897	-0.541443	-0.893608	-0.766449		1.13378	-0.205524	-0.103539	-0.118534	-0.905781	-0.434441	-0.992542	0.112362	-1.20924	-1.33717	-1.11855	0.135632	-1.80606	-0.229568	1.09896	-0.619251
		1.14402	-0.679367	0.612709	-0.101345	-1.25857	-0.757053	0.260612	-0.723915	1.14071	-0.399807	-0.211388	-1.62574	0.619061	-0.193649	-1.64878	-0.679092	-0.189487	-0.399593	-0.61628	0.185295	-0.495056	-2.63905	-0.837067	-0.506298	-0.626282	0.332066	0.483723	-1.57661	-0.55204	-0.946968	-0.763863		1.14402	-0.171249	-0.129871	-0.125759	-0.830406	-0.383121	-1.22362	0.0369377	-1.11174	-1.24331	-1.15275	0.199539	-1.80872	-0.220818	1.17071	-0.746841
		1.15426	-0.667206	0.638897	-0.0715408	-1.25089	-0.72525	0.213024	-0.752487	1.11683	-0.417152	-0.182144	-1.71917	0.493153	-0.179901	-1.70966	-0.665813	-0.224251	-0.393837	-0.564686	0.16156	-0.502769	-2.6778	-0.85384	-0.406113	-0.630051	0.34996	0.591431	-1.55724	-0.569157	-1.05747	-0.707977		1.15426	-0.2327	-0.129597	-0.206451	-0.628193	-0.352055	-1.33261	0.0624847	-1.01282	-1.26224	-1.09299	0.234585	-1.82974	-0.176544	1.28353	-0.694412
		1.1645	-0.664574	0.588448	0.108025	-1.11375	-0.647873	0.0923576	-0.72575	1.06787	-0.479572	-0.218754	-1.82231	0.545952	-0.137764	-1.76238	-0.726345	-0.180271	-0.375359	-0.57283	0.16386	-0.576046	-2.7498	-0.832611	-0.255981	-0.690823	0.438221	0.729282	-1.39916	-0.542122	-1.16972	-0.666706		1.1645	-0.333626	-0.197525	-0.225525	-0.393208	-0.294727	-1.38481	0.118988	-0.851185	-1.28881	-1.06508	0.229568	-1.75107	-0.138302	1.28434	-0.617893
		1.17474	-0.627258	0.558979	0.304276	-0.952213	-0.652641	0.0834198	-0.738815	1.01776	-0.524368	-0.326244	-1.90879	0.511166	-0.062088	-1.77103	-0.779598	-0.190453	-0.418774	-0.46405	0.153061	-0.590759	-2.69858	-0.899616	-0.151508	-0.81617	0.578743	0.934547	-1.32009	-0.53318	-1.16755	-0.639313		1.17474	-0.390465	-0.264412	-0.26564	-0.188522	-0.284389	-1.30857	0.066082	-0.842709	-1.31078	-1.10627	0.197144	-1.74552	-0.133999	1.27606	-0.519867
		1.18498	-0.577656	0.456291	0.369915	-0.957436	-0.612953	0.0885429	-0.671009	1.00072	-0.575809	-0.377075	-1.91817	0.39732	-0.0709457	-1.66178	-0.84248	-0.209812	-0.486713	-0.39286	0.0180664	-0.586456	-2.63759	-0.86544	-0.188915	-0.828163	0.670464	0.932583	-1.25778	-0.51606	-1.08383	-0.593632		1.18498	-0.442429	-0.227634	-0.251953	-0.0268745	-0.345676	-1.27221	0.0408592	-0.827866	-1.27544	-1.17844	0.172775	-1.69678	-0.187225	1.2077	-0.539761
		1.19522	-0.592617	0.601181	0.441727	-0.962429	-0.615147	0.185474	-0.692574	0.922855	-0.583664	-0.38958	-2.03615	0.432739	-0.096756	-1.73681	-0.946442	-0.30127	-0.624493	-0.291672	-0.140957	-0.412766	-2.75954	-0.686554	-0.21862	-0.710564	0.669151	0.90588	-1.32852	-0.574581	-1.01081	-0.584011		1.19522	-0.379009	-0.127785	-0.32658	0.0507889	-0.49538	-1.34804	-0.0315132	-0.809425	-1.25843	-1.11863	0.175243	-1.64547	-0.140373	1.14548	-0.560123
		1.20546	-0.566307	0.743065	0.387856	-1.07996	-0.565403	0.279972	-0.84819	0.708981	-0.582642	-0.367062	-2.06656	0.435707	-0.173847	-1.81529	-1.00037	-0.337273	-0.741714	-0.219101	-0.0546036	-0.312653	-2.81673	-0.510433	-0.178078	-0.665489	0.574562	0.924606	-1.39223	-0.63055	-0.94133	-0.573925		1.20546	-0.301163	-0.0454254	-0.422913	0.100605	-0.499886	-1.39084	0.0056076	-0.73077	-1.35329	-0.998539	0.258999	-1.60616	-0.171631	1.09156	-0.597019
		1.2157	-0.525024	0.819309	0.289185	-1.18077	-0.629501	0.20401	-0.906174	0.606388	-0.561432	-0.350754	-2.03292	0.307426	-0.142399	-1.9185	-0.902718	-0.337032	-0.839989	-0.250893	-0.0396538	-0.269119	-2.67644	-0.577801	-0.148872	-0.68187	0.5112	0.994629	-1.43608	-0.548973	-0.916821	-0.503639		1.2157	-0.157757	-0.0150719	-0.342052	0.115604	-0.365894	-1.50533	0.0534706	-0.678139	-1.47781	-0.865704	0.24329	-1.70127	-0.262135	1.14508	-0.539608
		1.22594	-0.541965	0.805553	0.154346	-1.21427	-0.715321	0.083931	-0.916019	0.758308	-0.529152	-0.274651	-2.01315	0.268562	-0.111275	-1.91781	-0.836769	-0.239948	-0.879627	-0.356571	-0.0523148	-0.319305	-2.52197	-0.656166	-0.217144	-0.72065	0.566551	1.03912	-1.47584	-0.474495	-0.888794	-0.496891		1.22594	-0.105042	-0.10038	-0.444359	0.0530319	-0.400345	-1.60201	0.0551529	-0.691826	-1.47627	-0.924129	0.289673	-1.832	-0.312931	1.29134	-0.476841
		1.23618	-0.527992	0.843723	0.131638	-1.16225	-0.729996	-0.087265	-0.93512	0.774437	-0.460175	-0.337177	-1.96087	0.329193	-0.171047	-1.83289	-0.969082	-0.158123	-1.05735	-0.451366	0.0723686	-0.426308	-2.46651	-0.727707	-0.241879	-0.79916	0.689587	1.14362	-1.49886	-0.474468	-0.868347	-0.478916		1.23618	-0.176186	-0.18037	-0.51804	0.0291519	-0.445683	-1.7373	-0.000385284	-0.729137	-1.37688	-0.825123	0.23653	-1.92226	-0.317616	1.3987	-0.519413
		1.24642	-0.535812	0.929447	0.104946	-1.12461	-0.654404	0.00861359	-0.915138	0.749832	-0.333172	-0.411037	-1.89579	0.422783	-0.23909	-1.9028	-1.12339	-0.0383911	-1.16606	-0.539917	0.129433	-0.402039	-2.53097	-0.872021	-0.0918427	-0.863235	0.7603	1.01977	-1.47353	-0.574249	-0.719589	-0.498348		1.24642	-0.255768	-0.311871	-0.42754	0.0846558	-0.545521	-1.74084	-0.0292244	-0.784058	-1.3948	-0.784008	0.247055	-1.95963	-0.384586	1.40491	-0.389618
		1.25666	-0.430004	0.978703	0.0454025	-1.01194	-0.702267	0.195	-0.865582	0.765247	-0.224331	-0.511852	-1.84125	0.422806	-0.318829	-1.91005	-1.20947	-0.0186844	-1.25125	-0.569874	0.117954	-0.348869	-2.51945	-0.834194	-0.0506096	-0.89592	0.719124	1.02759	-1.49285	-0.593117	-0.710075	-0.472633		1.25666	-0.256138	-0.301392	-0.306648	0.123936	-0.503082	-1.84246	-0.0739403	-0.950508	-1.38971	-0.798935	0.244194	-1.97102	-0.467758	1.3721	-0.285797
		1.2669	-0.326077	0.937996	0.0955772	-0.928097	-0.738945	0.362999	-0.779778	0.786251	-0.274986	-0.536552	-1.87464	0.363453	-0.235611	-1.93555	-1.12446	-0.159592	-1.14211	-0.532452	0.0171967	-0.297382	-2.56378	-0.805038	0.0168266	-0.851231	0.658245	1.07479	-1.44042	-0.61348	-0.614956	-0.420681		1.2669	-0.243206	-0.213604	-0.210876	0.117771	-0.459675	-1.88571	-0.0698013	-0.927059	-1.27848	-0.931149	0.351746	-2.04473	-0.426178	1.39022	-0.286728
		1.27714	-0.280266	0.722893	0.0611877	-0.854805	-0.779381	0.438652	-0.682762	0.926182	-0.374107	-0.524334	-1.89995	0.340424	-0.139908	-2.0771	-1.07935	-0.348179	-1.04741	-0.466576	0.0144081	-0.250366	-2.54436	-0.800461	0.118465	-0.92881	0.626415	1.05056	-1.3465	-0.536697	-0.508575	-0.399807		1.27714	-0.276131	-0.281231	-0.212841	0.100498	-0.406067	-1.7702	-0.0696373	-0.819855	-1.20521	-1.05812	0.418144	-2.05479	-0.27924	1.41223	-0.380379
		1.28738	-0.183933	0.74057	0.0377617	-0.775818	-0.823883	0.537247	-0.561852	0.97887	-0.369457	-0.3969	-1.82598	0.270458	-0.142197	-2.12371	-1.02576	-0.485508	-1.0354	-0.492325	-0.0227966	-0.245182	-2.54537	-0.762001	0.224907	-0.977615	0.64753	0.873264	-1.1857	-0.6213	-0.447109	-0.365013		1.28738	-0.363247	-0.231819	-0.269802	-0.03825	-0.29834	-1.67485	-0.00289154	-0.753551	-1.13615	-1.05999	0.343304	-1.92702	-0.285534	1.33913	-0.395878
		1.29762	-0.205486	0.785217	0.0499802	-0.746658	-0.782829	0.543732	-0.481216	0.980732	-0.334686	-0.323837	-1.87888	0.36647	0.0244675	-1.9842	-1.07184	-0.484207	-1.13076	-0.533287	-0.0666885	-0.156097	-2.59641	-0.804142	0.218365	-0.953869	0.686115	0.777206	-0.992313	-0.637035	-0.388542	-0.431221		1.29762	-0.360172	-0.199001	-0.398258	-0.131683	-0.383228	-1.58635	0.102657	-0.734432	-1.08899	-0.941235	0.403698	-1.82277	-0.259678	1.41733	-0.281803
		1.30786	-0.0759277	0.758488	0.16795	-0.672428	-0.763016	0.474293	-0.475971	0.965996	-0.354877	-0.344757	-1.85641	0.417324	0.156769	-1.96568	-1.133	-0.348442	-1.08058	-0.560253	-0.00943375	-0.108246	-2.7339	-0.894302	0.0392647	-0.95071	0.716469	0.762386	-0.898045	-0.580017	-0.376289	-0.448158		1.30786	-0.37896	-0.245792	-0.35358	-0.148434	-0.425453	-1.48128	0.114697	-0.830143	-1.07159	-0.875038	0.364513	-1.83899	-0.321941	1.45687	-0.204796
		1.3181	-0.0492859	0.730808	0.163132	-0.629574	-0.65469	0.40744	-0.439861	1.00069	-0.320499	-0.405769	-1.79554	0.451202	0.122017	-1.97849	-1.1756	-0.162354	-1.12091	-0.627571	0.179657	-0.20414	-2.98658	-0.881042	-0.123768	-0.992313	0.640877	0.805744	-0.934666	-0.440281	-0.48764	-0.468773		1.3181	-0.342052	-0.232334	-0.428135	-0.111526	-0.428764	-1.59252	0.104076	-0.909836	-1.08121	-0.8009	0.36655	-1.73619	-0.427753	1.47781	-0.0830116
		1.32834	-0.00379562	0.727066	0.229759	-0.519588	-0.52108	0.232525	-0.325325	1.03872	-0.293152	-0.462013	-1.70787	0.302692	0.0652504	-1.94663	-1.19949	-0.159756	-1.04944	-0.654751	0.219841	-0.316921	-3.01788	-0.808052	-0.188175	-1.05231	0.565918	0.820583	-0.999729	-0.359875	-0.557415	-0.292625		1.32834	-0.363117	-0.140804	-0.533264	-0.162346	-0.449734	-1.7796	-0.0250511	-0.900883	-1.13062	-0.762825	0.374107	-1.70229	-0.427036	1.51278	-0.10796
		1.33858	-0.0385551	0.774643	0.337788	-0.493721	-0.53257	0.132484	-0.147778	1.13599	-0.441998	-0.45715	-1.72508	0.185722	-0.00435638	-1.89429	-1.10337	-0.115734	-1.03139	-0.574318	0.113747	-0.393333	-2.87492	-0.880447	-0.117378	-1.08697	0.540943	0.771458	-0.946358	-0.453167	-0.488823	-0.147728		1.33858	-0.460274	-0.131111	-0.441296	-0.153545	-0.470524	-1.87996	-0.107388	-0.872952	-1.15034	-0.791054	0.387402	-1.7185	-0.340919	1.5273	-0.130825
		1.34882	-0.145702	0.764153	0.335258	-0.485317	-0.504665	0.228294	-0.105232	1.09683	-0.552979	-0.385147	-1.79458	0.258656	-0.102428	-1.89954	-1.0084	0.00144958	-1.00261	-0.562099	-0.0441475	-0.427368	-2.87257	-0.845245	0.0298462	-1.12324	0.462933	0.76339	-0.858562	-0.440746	-0.480717	-0.199989		1.34882	-0.499004	-0.194794	-0.453083	-0.107224	-0.44009	-1.87314	-0.129585	-0.771717	-1.11897	-0.801212	0.377079	-1.7075	-0.393646	1.58549	-0.0722694
		1.35906	-0.137524	0.712723	0.179237	-0.484245	-0.576786	0.262207	-0.104347	0.949722	-0.541454	-0.255302	-1.76197	0.412903	-0.210732	-1.89655	-0.882309	0.0425529	-0.975601	-0.48074	0.018116	-0.470108	-2.89397	-0.806885	0.0672073	-1.03569	0.432785	0.880703	-0.969666	-0.31052	-0.58984	-0.28756		1.35906	-0.468548	-0.25404	-0.586456	0.0850029	-0.371628	-1.95418	-0.122662	-0.734108	-1.19442	-0.690083	0.259453	-1.74034	-0.390617	1.63674	-0.0480232
		1.3693	-0.138622	0.77005	0.129826	-0.589127	-0.622635	0.310524	-0.111511	0.916214	-0.434845	-0.18634	-1.66625	0.481827	-0.279144	-1.88971	-0.88089	-0.0297813	-1.07269	-0.373749	0.0824165	-0.395279	-2.8325	-0.847343	0.13562	-1.10002	0.457535	1.03049	-1.04982	-0.264851	-0.646488	-0.402824		1.3693	-0.471561	-0.249882	-0.580162	0.280899	-0.32906	-1.98718	-0.120457	-0.87096	-1.24237	-0.576157	0.179928	-1.74251	-0.291317	1.7151	-0.00378418
		1.37954	-0.132149	0.94133	0.113041	-0.706833	-0.610489	0.312168	-0.222782	0.992054	-0.425404	-0.153355	-1.56934	0.475365	-0.27824	-2.01623	-0.813656	-0.0542336	-1.01416	-0.230148	-0.0317001	-0.313156	-2.66599	-0.906914	0.227291	-1.10931	0.483021	1.08105	-1.02282	-0.240772	-0.561481	-0.630634		1.37954	-0.475151	-0.284321	-0.559036	0.272175	-0.398712	-2.0176	-0.132103	-0.861794	-1.26204	-0.560455	0.0436478	-1.77587	-0.223774	1.67384	0.0432777
		1.38978	-0.24865	1.01907	0.189503	-0.807121	-0.586418	0.300701	-0.326267	1.08197	-0.415485	-0.185291	-1.53243	0.489445	-0.284153	-1.98727	-0.813679	-0.0822105	-1.04552	-0.282627	-0.143604	-0.221363	-2.61026	-0.952629	0.140007	-0.957829	0.47192	0.969978	-1.0396	-0.22525	-0.553005	-0.622993		1.38978	-0.489658	-0.30455	-0.487225	0.138588	-0.407356	-2.05661	-0.125759	-0.849693	-1.29868	-0.58437	-0.00221252	-1.69113	-0.247437	1.75164	-0.069149
		1.40002	-0.273529	1.12677	0.107784	-0.836983	-0.467232	0.431938	-0.435322	1.14216	-0.445324	-0.166908	-1.56771	0.454865	-0.374001	-1.85345	-0.826782	-0.168686	-1.01927	-0.446659	-0.390556	-0.138321	-2.61974	-0.970154	0.102097	-0.999382	0.378807	0.927074	-1.11148	-0.299671	-0.483135	-0.489193		1.40002	-0.416153	-0.269405	-0.537235	0.0083046	-0.319023	-2.01026	-0.11639	-0.854176	-1.38238	-0.580482	0.0756798	-1.73239	-0.244408	1.78868	-0.233372
		1.41026	-0.299984	1.22073	0.13686	-0.727394	-0.385086	0.512882	-0.274887	1.11008	-0.457874	-0.0860977	-1.53104	0.323875	-0.327164	-1.74685	-0.901405	-0.096077	-0.938087	-0.512833	-0.420406	-0.0908165	-2.66893	-0.994247	0.0157433	-1.14799	0.305637	0.841362	-1.17131	-0.365738	-0.335209	-0.421398		1.41026	-0.374741	-0.289841	-0.70005	-0.0659981	-0.321953	-1.92012	-0.221889	-0.989155	-1.35963	-0.60149	0.0783615	-1.8604	-0.236912	1.75533	-0.292282
		1.4205	-0.361744	1.2156	0.324566	-0.617413	-0.309792	0.542694	-0.124542	1.06207	-0.430733	-0.0570107	-1.5027	0.318691	-0.163284	-1.81675	-0.863865	-0.0484276	-0.730865	-0.437157	-0.365204	-0.0642242	-2.77642	-0.989357	-0.0225601	-1.20296	0.225777	0.908276	-1.21367	-0.495033	-0.367146	-0.284496		1.4205	-0.3596	-0.344688	-0.810879	-0.209503	-0.366074	-1.95145	-0.168079	-1.03294	-1.3637	-0.581543	0.0603752	-1.93003	-0.233799	1.71782	-0.25893
		1.43074	-0.411823	1.14264	0.450966	-0.522617	-0.402275	0.65976	-0.145882	1.11489	-0.367836	0.0102615	-1.57588	0.450069	0.0886765	-1.86035	-0.844711	-0.0622673	-0.719887	-0.326267	-0.275558	-0.035099	-2.92146	-1.02155	-0.100174	-1.21961	0.265724	0.861462	-1.27834	-0.532776	-0.499779	-0.381344		1.43074	-0.303192	-0.454967	-0.729328	-0.232441	-0.389416	-1.89051	-0.16362	-0.991875	-1.35978	-0.543148	0.0396919	-1.96913	-0.158077	1.65842	-0.267132
		1.44098	-0.506287	0.9986	0.526711	-0.515358	-0.392071	0.659939	-0.255913	1.23761	-0.300411	-0.0249786	-1.73607	0.513813	0.183338	-1.88548	-0.875633	0.0210609	-0.726849	-0.16077	-0.302784	-0.0257645	-2.96998	-1.02356	-0.0737953	-1.2177	0.334484	0.676128	-1.36991	-0.605122	-0.615707	-0.433689		1.44098	-0.219875	-0.495522	-0.575714	-0.23735	-0.340672	-1.88591	-0.16795	-0.872536	-1.39385	-0.574295	0.0634384	-1.95649	-0.080246	1.48459	-0.235504
		1.45122	-0.503426	0.854977	0.556835	-0.485256	-0.385502	0.584621	-0.36755	1.26437	-0.228279	-0.132671	-1.86423	0.54211	0.300522	-1.91716	-0.846928	0.026329	-0.758068	-0.0395699	-0.285618	-0.0374489	-2.9557	-1.14364	-0.123566	-1.27386	0.258392	0.555714	-1.34932	-0.591473	-0.720875	-0.610367		1.45122	-0.221806	-0.500576	-0.53994	-0.14743	-0.414593	-2.024	-0.192196	-0.885944	-1.42623	-0.5536	0.0806885	-1.87927	-0.0292587	1.38915	-0.0284729
		1.46146	-0.507027	0.814682	0.520332	-0.417259	-0.35643	0.674099	-0.388508	1.22786	-0.218098	-0.134209	-1.70127	0.585968	0.349934	-1.85575	-0.87426	0.0260658	-0.750904	-0.0457573	-0.208157	-0.0503349	-2.83737	-1.26239	-0.17939	-1.28868	0.229305	0.531799	-1.27615	-0.486401	-0.854805	-0.641159		1.46146	-0.149471	-0.534363	-0.550026	-0.00501251	-0.473721	-2.12995	-0.227493	-1.01223	-1.44499	-0.465969	0.129253	-1.79068	-0.134892	1.34645	0.133591
		1.4717	-0.489227	0.899059	0.373703	-0.490765	-0.365726	0.792595	-0.28421	1.24396	-0.227001	-0.0556145	-1.57646	0.558826	0.407764	-1.73273	-0.795475	0.0593033	-0.816837	-0.158146	-0.0685501	0.0685654	-2.7094	-1.25488	-0.155525	-1.31338	0.265202	0.57449	-1.11187	-0.509289	-0.91254	-0.579517		1.4717	-0.0921783	-0.5704	-0.596863	-0.0659065	-0.4664	-2.09617	-0.19775	-1.03573	-1.46154	-0.460331	0.180656	-1.72767	-0.197655	1.38552	0.172073
		1.48194	-0.404362	0.964981	0.279053	-0.58239	-0.324169	0.717979	-0.148148	1.24619	-0.277	0.0165558	-1.52678	0.460419	0.35183	-1.62526	-0.75119	0.144108	-0.771049	-0.23859	-0.0537567	0.170273	-2.65037	-1.36282	-0.144379	-1.27031	0.258049	0.685902	-0.979752	-0.572842	-0.812107	-0.56179		1.48194	-0.0257301	-0.51239	-0.597065	-0.0477982	-0.349289	-2.01101	-0.144787	-0.997276	-1.34003	-0.544685	0.160629	-1.6992	-0.107471	1.50085	0.181515
		1.49218	-0.301353	0.937744	0.271255	-0.656311	-0.306908	0.665779	-0.100414	1.26276	-0.371758	-0.0131187	-1.62242	0.483746	0.348171	-1.62959	-0.727646	0.236649	-0.709145	-0.188629	-0.18335	0.316639	-2.70893	-1.39565	-0.159138	-1.3278	0.195606	0.753483	-0.848286	-0.642113	-0.852242	-0.533478		1.49218	-0.0461998	-0.317677	-0.492889	-0.066143	-0.302689	-2.01094	-0.0751076	-0.904221	-1.21861	-0.579567	0.0637589	-1.66624	-0.0770149	1.54458	0.130028
		1.50242	-0.231224	0.999493	0.380569	-0.697617	-0.326637	0.724693	-0.0226173	1.116	-0.446167	-0.059597	-1.76408	0.585899	0.388451	-1.64772	-0.760727	0.419445	-0.739517	-0.0549698	-0.206059	0.444538	-2.60053	-1.36596	-0.176567	-1.40714	0.159687	0.837204	-0.903038	-0.596634	-0.847546	-0.494232		1.50242	-0.0598373	-0.0876617	-0.410576	-0.0986748	-0.42836	-1.94399	0.002285	-0.997074	-1.21457	-0.566513	0.0316582	-1.62559	-0.132771	1.5836	0.0403709
		1.51266	-0.186401	1.17252	0.457378	-0.625378	-0.299973	0.77475	0.00865173	1.0471	-0.482136	-0.107948	-1.79552	0.596413	0.365967	-1.67711	-0.798874	0.482876	-0.750977	0.075573	-0.246243	0.455791	-2.41141	-1.26198	-0.150707	-1.54697	0.146526	0.891788	-0.995403	-0.463512	-0.826508	-0.444691		1.51266	-0.186497	-0.0398445	-0.450165	-0.0766449	-0.506229	-1.88904	-0.0137749	-1.00321	-1.14173	-0.642365	0.0510292	-1.538	-0.129025	1.56999	0.0693398
		1.5229	-0.230198	1.21604	0.454159	-0.647846	-0.321987	0.788719	-0.0323105	1.01809	-0.404469	-0.135021	-1.78378	0.5313	0.390896	-1.61703	-0.842625	0.503811	-0.809219	0.0292969	-0.233345	0.375206	-2.40348	-1.14294	-0.158195	-1.57917	0.128799	0.772259	-0.922016	-0.334911	-0.700539	-0.405399		1.5229	-0.163097	-0.09758	-0.444847	-0.179417	-0.50835	-1.8478	0.0509911	-1.02851	-0.999229	-0.756962	0.106209	-1.46539	-0.0766563	1.65134	0.18092
		1.53314	-0.177139	1.12805	0.367363	-0.820236	-0.395267	0.776646	-0.0791702	1.09157	-0.329819	-0.200882	-1.80397	0.483128	0.498089	-1.76289	-0.833443	0.448772	-0.757816	-0.00941086	-0.13942	0.346775	-2.41882	-0.909775	-0.263744	-1.59209	0.140675	0.718933	-0.945667	-0.341885	-0.640732	-0.373177		1.53314	-0.125854	-0.183372	-0.435406	-0.295132	-0.402611	-1.91851	0.109287	-1.07722	-1.05252	-0.813728	0.0717354	-1.40783	-0.0160637	1.61983	0.180191
		1.54338	-0.12167	1.13182	0.494762	-0.836792	-0.53603	0.663811	0.0491447	1.09939	-0.402096	-0.204033	-1.87988	0.547714	0.645943	-1.86595	-0.758118	0.377865	-0.763027	-0.176338	-0.0677261	0.298637	-2.53825	-0.814262	-0.312798	-1.54757	0.0718536	0.73938	-1.02021	-0.42067	-0.617676	-0.573841		1.54338	-0.189896	-0.0678253	-0.412411	-0.370045	-0.247974	-1.92581	0.195591	-1.21468	-1.15172	-0.837868	0.0389175	-1.35005	-0.0742264	1.71083	0.103443
		1.55362	-0.0513458	1.16653	0.486572	-0.758427	-0.641579	0.555786	0.0590744	1.10827	-0.632896	-0.0976143	-1.96917	0.554176	0.619705	-1.75142	-0.715664	0.45639	-0.821465	-0.290123	0.01474	0.107903	-2.47536	-0.68671	-0.299698	-1.55455	0.0288429	0.74025	-1.12424	-0.440697	-0.683239	-0.7528		1.55362	-0.229637	-0.0199623	-0.447865	-0.496704	-0.232071	-1.96394	0.174957	-1.30267	-1.15898	-0.866085	0.0447464	-1.35946	-0.0379372	1.85117	-0.0850258
		1.56386	-0.0590248	1.17901	0.332542	-0.764183	-0.517265	0.509506	-0.00471497	1.10754	-0.756721	0.0463219	-2.00376	0.50256	0.504143	-1.62085	-0.699097	0.523037	-0.879864	-0.420456	0.0268898	0.128838	-2.40073	-0.744228	-0.287643	-1.53972	-0.0638046	0.67733	-1.28404	-0.383678	-0.787491	-0.749676		1.56386	-0.285763	0.0454826	-0.483898	-0.526089	-0.22493	-1.97542	0.138264	-1.32671	-1.14699	-0.888329	-0.00498962	-1.3413	-0.0230141	1.84966	-0.272984
		1.5741	-0.102249	1.14176	0.200638	-0.632923	-0.496811	0.489529	-0.0239639	1.20986	-0.660759	0.172028	-1.91355	0.522682	0.44281	-1.6593	-0.784721	0.631077	-1.04647	-0.377518	-0.121346	0.127357	-2.32861	-0.852051	-0.232914	-1.56051	-0.140991	0.573357	-1.435	-0.395409	-0.891724	-0.599377		1.5741	-0.332264	0.0928955	-0.470154	-0.542217	-0.342091	-1.9854	0.0879707	-1.3491	-1.17478	-0.913803	-0.00075531	-1.40045	-0.0763359	1.81829	-0.340885
		1.58434	-0.253849	1.15359	0.0628777	-0.44215	-0.47628	0.419147	0.0667877	1.19873	-0.673595	0.207466	-1.8409	0.507946	0.447662	-1.69219	-0.701443	0.662346	-1.12133	-0.38871	-0.226131	0.163597	-2.28484	-0.921944	-0.288074	-1.61074	-0.0417519	0.501759	-1.48092	-0.474495	-1.03089	-0.466866		1.58434	-0.338726	0.0331688	-0.607758	-0.599663	-0.374062	-1.94328	0.0721512	-1.27292	-1.20084	-0.828403	0.0534363	-1.4885	-0.0712929	1.78501	-0.305038
		1.59458	-0.365379	1.07939	0.0939789	-0.385872	-0.614002	0.367508	0.11253	1.14313	-0.714378	0.213749	-1.68074	0.557907	0.438091	-1.71454	-0.523655	0.617023	-1.21395	-0.241581	-0.185005	0.142902	-2.08585	-0.964539	-0.322155	-1.64136	0.0762558	0.528786	-1.51814	-0.561325	-1.0866	-0.469273		1.59458	-0.338833	-0.0947762	-0.645023	-0.620655	-0.464161	-1.93995	0.0262337	-1.13774	-1.22158	-0.774307	0.0657272	-1.54311	-0.0481682	1.73865	-0.142925
		1.60482	-0.47987	0.968094	0.219864	-0.448746	-0.802151	0.308701	0.146347	1.09842	-0.820259	0.152405	-1.55604	0.538307	0.379845	-1.69482	-0.492577	0.480923	-1.21501	-0.0665131	-0.0567474	0.176033	-1.98376	-0.963608	-0.34185	-1.74385	0.0420647	0.648232	-1.45871	-0.763123	-1.09443	-0.451355		1.60482	-0.230961	-0.0867653	-0.636677	-0.526886	-0.43848	-1.85337	0.0185318	-1.04988	-1.20974	-0.807327	0.0297356	-1.6529	0.0125237	1.75495	-0.180466
		1.61506	-0.443165	0.969059	0.173611	-0.417343	-0.928265	0.333126	0.103123	1.07669	-0.904373	0.060791	-1.53777	0.508568	0.272903	-1.7019	-0.491264	0.419388	-1.13869	0.135071	0.00317764	0.276085	-2.05908	-1.03197	-0.301914	-1.75484	0.0781136	0.692493	-1.41484	-0.822525	-1.04876	-0.500076		1.61506	-0.214035	-0.0925827	-0.539452	-0.466366	-0.373238	-1.91508	0.0079689	-1.00888	-1.30609	-0.939484	0.119106	-1.79829	0.0332909	1.67173	-0.202984
		1.6253	-0.319317	0.897892	0.176449	-0.481537	-0.920872	0.477036	-0.180489	1.13936	-0.972431	-0.0200081	-1.64018	0.426205	0.175629	-1.79324	-0.517742	0.432369	-1.14184	0.15255	-0.0869904	0.314518	-2.09072	-1.0495	-0.243118	-1.81142	0.0883179	0.776825	-1.4766	-0.884575	-1.04565	-0.491982		1.6253	-0.316898	-0.135963	-0.508205	-0.343674	-0.407524	-1.94387	-0.118763	-1.13006	-1.32876	-1.09546	0.123768	-1.80336	0.124996	1.65636	-0.326889
		1.63554	-0.141113	0.842793	0.0652733	-0.513786	-0.830284	0.580318	-0.403885	1.11042	-0.935249	-0.115982	-1.67297	0.532944	0.164875	-1.89121	-0.519318	0.439842	-1.22555	0.114403	-0.197498	0.56699	-2.09506	-1.0188	-0.349453	-1.73009	0.043663	0.783844	-1.46437	-0.805023	-0.966564	-0.528233		1.63554	-0.446026	-0.0716743	-0.524277	-0.327595	-0.343506	-2.0573	-0.135998	-1.1635	-1.3828	-1.13763	0.0205116	-1.83701	0.132732	1.59557	-0.352592
		1.64578	-0.00559616	0.789696	0.0459862	-0.64389	-0.704315	0.626751	-0.378601	1.05753	-0.892834	-0.0584869	-1.65697	0.539822	0.214428	-1.89285	-0.540199	0.466808	-1.2129	0.197334	-0.122601	0.687943	-1.97495	-1.08509	-0.429955	-1.63833	-0.0508842	0.706108	-1.53041	-0.615948	-0.901596	-0.549095		1.64578	-0.53653	-0.0799942	-0.550526	-0.364429	-0.350483	-2.17412	-0.145679	-1.02079	-1.339	-1.16369	0.035305	-1.84695	-0.0233116	1.54472	-0.259144
		1.65602	0.0473442	0.934002	0.0645599	-0.605217	-0.710064	0.521858	-0.313251	1.13504	-0.909763	0.0359268	-1.65731	0.329597	0.111443	-1.75802	-0.560658	0.477524	-1.27803	0.245293	-0.0236549	0.728542	-1.85936	-1.23892	-0.42873	-1.60246	-0.038723	0.498566	-1.6404	-0.523811	-0.900879	-0.579288		1.65602	-0.538548	-0.128036	-0.582344	-0.409073	-0.456768	-2.22115	-0.0413361	-0.967628	-1.41392	-1.14681	-0.033493	-1.85944	-0.100918	1.51878	-0.235088
		1.66626	0.0325775	1.05004	0.101192	-0.573711	-0.614719	0.465042	-0.282066	1.16773	-0.825993	-0.013176	-1.76297	0.246902	0.0763016	-1.77081	-0.533741	0.514133	-1.27105	0.181026	0.0558815	0.687988	-1.84454	-1.253	-0.459305	-1.49061	-0.108772	0.300011	-1.70886	-0.463539	-0.922733	-0.56749		1.66626	-0.61969	-0.141315	-0.581745	-0.375324	-0.517006	-2.11895	0.0602074	-0.847248	-1.35948	-1.04655	0.00164032	-1.86106	-0.0972786	1.55521	-0.184254
		1.6765	-0.06147	0.999969	0.0396194	-0.638062	-0.616783	0.451538	-0.394886	1.07075	-0.807087	-0.107304	-1.88734	0.362511	0.0654068	-1.97468	-0.584549	0.584492	-1.21346	0.0723572	0.136063	0.742634	-1.88651	-1.20925	-0.455349	-1.45473	-0.18132	0.243637	-1.72005	-0.489944	-0.882786	-0.573448		1.6765	-0.624187	-0.262146	-0.66647	-0.323971	-0.571388	-2.01078	0.159069	-0.820095	-1.25803	-0.973946	0.103146	-1.8751	-0.000637054	1.52668	-0.100891
		1.68674	-0.261646	1.0173	-0.0817451	-0.779358	-0.587349	0.360901	-0.407581	1.01865	-0.859489	-0.173241	-1.90808	0.449116	-0.000659943	-2.20635	-0.710979	0.668617	-1.2392	0.0263405	0.151405	0.797997	-1.97573	-1.18907	-0.374714	-1.41477	-0.20583	0.194702	-1.69677	-0.557522	-0.964409	-0.584438		1.68674	-0.697346	-0.366241	-0.653595	-0.341137	-0.575466	-1.93589	0.265568	-0.747864	-1.16852	-0.919312	-0.00634766	-1.93173	0.0828819	1.55743	-0.00574112
		1.69698	-0.278786	1.07765	-0.130692	-0.870911	-0.55162	0.219055	-0.304394	0.933964	-0.941399	-0.115471	-1.94345	0.49419	-0.0267563	-2.21744	-0.767284	0.716755	-1.25369	0.0791016	0.170097	0.830681	-2.06103	-1.1399	-0.480537	-1.44669	-0.171989	0.280197	-1.68757	-0.675812	-1.04615	-0.560825		1.69698	-0.629337	-0.345997	-0.654095	-0.380402	-0.569538	-1.91867	0.374252	-0.776058	-1.26616	-0.754841	-0.202126	-2.00882	0.0303574	1.54095	0.111397
		1.70722	-0.361984	1.15697	-0.0812454	-0.791958	-0.55899	0.128609	-0.221794	0.901218	-0.818878	-0.00754929	-1.95881	0.457806	-0.0378189	-2.15363	-0.78215	0.762531	-1.28627	0.0547371	0.0817871	0.729332	-2.13601	-1.04847	-0.484505	-1.54175	-0.0976486	0.306473	-1.70093	-0.626556	-1.01014	-0.470428		1.70722	-0.632256	-0.31131	-0.692432	-0.403671	-0.478165	-2.03275	0.302822	-0.80611	-1.382	-0.71376	-0.255005	-2.03517	0.0264359	1.45295	0.0690041
		1.71746	-0.405746	1.214	0.00488281	-0.86433	-0.792854	0.0888786	-0.232071	0.833744	-0.820724	0.0480385	-1.86298	0.465355	0.081131	-2.11282	-0.750175	0.722416	-1.20304	0.0443764	-0.0155983	0.653633	-2.01933	-1.11298	-0.402527	-1.59026	-0.0935135	0.313065	-1.62839	-0.598148	-0.969807	-0.4244		1.71746	-0.596542	-0.197262	-0.743801	-0.364189	-0.436718	-2.20477	0.17664	-0.867397	-1.37971	-0.645321	-0.310223	-2.00997	0.105171	1.44722	0.0094223
		1.7277	-0.450092	1.34023	0.146469	-0.895969	-0.980145	0.0469742	-0.360313	0.711628	-0.862831	0.100609	-1.89017	0.471027	0.298092	-2.07762	-0.775055	0.719223	-1.15696	0.0619354	-0.0950508	0.598568	-1.94302	-1.10063	-0.311153	-1.67418	-0.0792084	0.359627	-1.58847	-0.661079	-0.985115	-0.400761		1.7277	-0.514763	-0.242287	-0.627033	-0.477715	-0.421638	-2.28874	0.177963	-0.986176	-1.38267	-0.654716	-0.313274	-2.02588	0.132221	1.41111	0.11385
		1.73794	-0.362328	1.39928	0.296745	-0.731926	-1.03934	0.0279999	-0.377815	0.686535	-0.992241	0.116962	-1.86374	0.264629	0.443478	-2.10571	-0.861958	0.629372	-1.16525	0.0774574	-0.206738	0.63015	-1.93336	-1.17561	-0.1465	-1.57404	-0.0641136	0.457676	-1.57679	-0.796535	-1.00794	-0.362877		1.73794	-0.541298	-0.316757	-0.481136	-0.547688	-0.39093	-2.2606	0.116177	-1.07673	-1.36376	-0.74268	-0.251133	-1.93045	0.148422	1.5223	0.038044
		1.74818	-0.178055	1.39794	0.340446	-0.783054	-0.87587	0.0625801	-0.438183	0.636703	-0.971703	0.0117378	-1.91895	0.101692	0.356335	-2.10559	-0.932652	0.615952	-1.22427	0.00207138	-0.178375	0.628933	-1.98099	-1.24959	-0.151711	-1.47831	-0.152939	0.367912	-1.54116	-0.897339	-1.05846	-0.479454		1.74818	-0.622074	-0.321991	-0.406437	-0.592678	-0.49947	-2.24189	-0.0174942	-1.09839	-1.28394	-0.756939	-0.131207	-1.76118	0.0783157	1.60373	0.0145988
		1.75842	-0.0990295	1.29386	0.2742	-0.856857	-0.865929	0.138325	-0.445812	0.596363	-0.971035	-0.0208778	-1.89621	0.0481186	0.302788	-2.12812	-0.962738	0.729805	-1.26821	-0.112206	-0.214272	0.668579	-1.93146	-1.38346	-0.200516	-1.39071	-0.343769	0.259144	-1.53996	-0.902931	-1.08108	-0.517502		1.75842	-0.642376	-0.258656	-0.44672	-0.576645	-0.494568	-2.24964	-0.16256	-1.09365	-1.20062	-0.796787	-0.0558319	-1.63966	0.0729866	1.67531	0.00612259
		1.76866	-0.108376	1.22453	0.178082	-0.788906	-0.922256	0.193485	-0.452702	0.470001	-0.928467	0.00141525	-1.84037	0.0979004	0.347134	-2.05256	-0.965611	0.735626	-1.26744	-0.206059	-0.154999	0.72493	-1.96518	-1.46722	-0.272671	-1.3782	-0.278908	0.290627	-1.59302	-0.831535	-1.06956	-0.461117		1.76866	-0.673611	-0.295334	-0.552826	-0.51276	-0.400467	-2.11517	-0.109104	-1.08318	-1.13687	-0.772579	-0.0283051	-1.60177	0.024456	1.48248	-0.122959
		1.7789	-0.143269	1.143	0.0902252	-0.808456	-0.917259	0.244125	-0.361839	0.408897	-0.861469	0.0183182	-1.68246	0.158474	0.429031	-2.08194	-1.06853	0.565132	-1.24326	-0.333981	-0.0687866	0.769039	-1.96926	-1.342	-0.294201	-1.34392	-0.14576	0.391922	-1.59836	-0.720623	-1.03903	-0.328865		1.7789	-0.748867	-0.338776	-0.577385	-0.377922	-0.358253	-2.13217	-0.0630913	-1.14634	-1.06513	-0.84893	0.0380211	-1.61241	-0.0262794	1.52269	-0.266022
		1.78914	-0.196522	1.13729	0.0706406	-0.780907	-0.874477	0.276909	-0.389782	0.477383	-0.790207	0.00279617	-1.5578	0.164646	0.399334	-2.14117	-1.12444	0.499496	-1.19749	-0.392479	-0.06147	0.863037	-2.01831	-1.23542	-0.426155	-1.23758	-0.176029	0.519142	-1.58903	-0.708858	-1.0134	-0.288158		1.78914	-0.840454	-0.283127	-0.536079	-0.399693	-0.377781	-2.2208	0.0319176	-1.18766	-1.06646	-0.884872	0.0412636	-1.67729	0.0183411	1.99934	-0.249142
		1.79938	-0.316315	1.13554	-0.0362549	-0.694447	-0.823704	0.286873	-0.385956	0.605316	-0.73859	0.049015	-1.54111	0.114578	0.411972	-2.11633	-1.095	0.543411	-1.22095	-0.244812	-0.135902	0.775513	-1.97223	-1.14503	-0.375595	-1.18346	-0.30077	0.544579	-1.62863	-0.732914	-0.987427	-0.292889		1.79938	-0.88139	-0.243622	-0.523571	-0.48217	-0.492722	-2.3154	0.118999	-1.16168	-1.12934	-0.896938	0.168377	-1.74076	0.0550804	2.02991	-0.235432
		1.80962	-0.565903	1.19632	-0.038269	-0.656372	-0.873878	0.20525	-0.245193	0.638206	-0.831501	-0.0189705	-1.60964	0.10305	0.380451	-2.16122	-1.01854	0.519199	-1.18788	-0.124126	-0.282005	0.764057	-1.99318	-1.07475	-0.419025	-1.17279	-0.407845	0.546116	-1.65682	-0.868645	-0.945309	-0.232307		1.80962	-0.872593	-0.27253	-0.464733	-0.599785	-0.607533	-2.32096	0.259705	-1.10895	-1.20995	-0.921303	0.118023	-1.74654	0.202267	1.97938	-0.291149
		1.81986	-0.717598	0.965054	-0.033596	-0.746887	-0.935844	0.230343	-0.151211	0.782066	-0.89938	-0.160378	-1.72282	0.0442352	0.22921	-2.36801	-0.965302	0.512848	-1.25108	-0.124733	-0.422707	0.827332	-2.15103	-1.07977	-0.430637	-1.21242	-0.560478	0.53936	-1.66659	-0.95388	-0.897614	-0.141876		1.81986	-0.818722	-0.288231	-0.402565	-0.549297	-0.594074	-2.30062	0.267239	-1.11234	-1.21761	-0.90546	0.125103	-1.83691	0.232571	1.85139	-0.295967
		1.8301	-0.740116	0.484402	0.0114288	-0.872078	-0.98938	0.18248	-0.0166702	0.892029	-0.979843	-0.240162	-1.80952	0.051281	0.207481	-2.43228	-0.960938	0.568111	-1.24746	-0.0735321	-0.440517	0.892776	-2.23223	-1.15292	-0.467163	-1.31961	-0.551586	0.522015	-1.73166	-1.08036	-0.794807	-0.198811		1.8301	-0.804359	-0.320107	-0.453621	-0.560589	-0.490242	-2.29266	0.274055	-1.13166	-1.30635	-0.841526	0.0559616	-1.92106	0.234383	1.74781	-0.298149
		1.84034	-0.764194	0.441582	-0.00830078	-1.00472	-1.01709	0.106819	-0.058403	1.04781	-1.01637	-0.296085	-1.91109	0.118073	0.233086	-2.44666	-0.974922	0.719578	-1.18558	-0.0198517	-0.39156	0.897942	-2.28658	-1.327	-0.535767	-1.41064	-0.459507	0.519199	-1.8255	-1.05027	-0.826385	-0.222187		1.84034	-0.738865	-0.278576	-0.462429	-0.547905	-0.479443	-2.29226	0.309784	-1.1836	-1.30239	-0.81715	0.0418472	-1.80928	0.297813	1.64219	-0.230854
		1.85058	-0.744537	0.481197	-0.0625877	-1.08089	-1.0695	0.111397	-0.107769	1.16155	-1.04183	-0.253838	-1.90001	0.139996	0.231094	-2.21211	-0.998035	0.790962	-1.22067	-0.0267563	-0.371471	0.910065	-2.21174	-1.36159	-0.604561	-1.42248	-0.344662	0.461048	-1.91874	-1.08191	-0.920944	-0.207439		1.85058	-0.644844	-0.280674	-0.5341	-0.576061	-0.506977	-2.2719	0.384945	-1.2152	-1.29073	-0.955803	0.0469856	-1.75995	0.341064	1.52317	-0.27359
		1.86082	-0.594013	0.550995	-0.0101013	-1.05209	-1.12696	0.0649414	-0.246803	1.29947	-1.12266	-0.20842	-1.84314	0.134605	0.185413	-2.01083	-1.049	0.682362	-1.36413	-0.25238	-0.323704	0.820312	-2.13536	-1.30766	-0.646416	-1.4699	-0.278072	0.397797	-1.92072	-1.03952	-0.965851	-0.247005		1.86082	-0.607174	-0.21109	-0.514191	-0.490494	-0.502056	-2.28513	0.42506	-1.13615	-1.19523	-1.00017	0.0550575	-1.72315	0.307674	1.4332	-0.343235
		1.87106	-0.531116	0.65176	-0.0381737	-0.990742	-1.27781	0.142532	-0.174896	1.39095	-1.05787	-0.194794	-1.81867	0.209137	0.177155	-1.86966	-1.12029	0.556835	-1.40292	-0.359779	-0.308876	0.717266	-2.17197	-1.28916	-0.623184	-1.49318	-0.275902	0.428493	-1.71732	-0.975159	-1.03345	-0.279301		1.87106	-0.558811	-0.160114	-0.562828	-0.485962	-0.419636	-2.32325	0.479038	-1.02581	-1.14878	-1.09554	0.0716858	-1.74041	0.345879	1.34066	-0.309486
		1.8813	-0.569134	0.82235	-0.0436707	-0.814384	-1.27166	0.163895	-0.0918198	1.46665	-1.07368	-0.286655	-1.8467	0.259609	0.267109	-1.78332	-1.17833	0.525829	-1.44666	-0.322704	-0.33683	0.539608	-2.23662	-1.2583	-0.479046	-1.37831	-0.271885	0.444672	-1.60784	-0.943199	-0.997772	-0.244835		1.8813	-0.674812	-0.101547	-0.557941	-0.448544	-0.526123	-2.36925	0.460358	-0.993351	-1.23751	-1.12966	0.0948715	-1.7831	0.396496	1.1988	-0.184959
		1.89154	-0.510685	1.04031	-0.0219154	-0.689751	-1.18807	0.0693054	-0.0450783	1.4665	-1.10634	-0.192432	-1.89977	0.274059	0.187153	-1.73903	-1.17716	0.584812	-1.39721	-0.36475	-0.371723	0.580223	-2.17136	-1.29228	-0.38237	-1.35622	-0.353268	0.430843	-1.61983	-0.901249	-0.863544	-0.336197		1.89154	-0.825314	-0.104145	-0.64724	-0.478012	-0.520687	-2.48602	0.434452	-1.09893	-1.283	-1.14171	0.137074	-1.83369	0.474243	1.09662	-0.0848351
		1.90178	-0.58234	1.08052	-0.0362663	-0.704926	-1.17419	0.169155	-0.116997	1.36551	-1.16612	-0.171261	-1.88799	0.183449	0.171848	-1.76842	-1.06508	0.673695	-1.32698	-0.447327	-0.45475	0.690445	-2.10021	-1.26988	-0.465172	-1.41082	-0.399712	0.430973	-1.63683	-0.875965	-0.762741	-0.463905		1.90178	-0.853985	-0.15469	-0.696785	-0.580521	-0.665813	-2.38317	0.406986	-1.13159	-1.365	-1.05488	0.0588493	-1.88208	0.560349	1.1228	-0.0908775
		1.91202	-0.605778	1.15177	0.00468063	-0.831966	-1.11885	0.173504	-0.175804	1.26795	-1.06721	-0.178413	-1.93091	0.140724	0.227352	-1.79263	-0.941032	0.758442	-1.29548	-0.46125	-0.505749	0.66497	-1.97542	-1.30995	-0.495987	-1.5251	-0.493771	0.453575	-1.59846	-0.853317	-0.746647	-0.553886		1.91202	-0.795406	-0.153942	-0.769512	-0.574928	-0.572247	-2.27765	0.359802	-1.1017	-1.37705	-0.885277	0.0303802	-1.91521	0.539799	1.01592	-0.165302
		1.92226	-0.583176	1.30502	0.0605164	-0.81641	-0.890903	0.0997963	-0.206619	1.2243	-1.02022	-0.198559	-1.88266	0.0886269	0.31918	-1.75338	-0.931099	0.73621	-1.40495	-0.518398	-0.636429	0.529179	-1.9104	-1.26225	-0.550896	-1.51929	-0.46851	0.446911	-1.6077	-0.876671	-0.790768	-0.520531		1.92226	-0.721901	-0.128738	-0.865894	-0.598248	-0.106293	-2.26238	0.400967	-1.00735	-1.41578	-0.81921	-0.039608	-1.82075	0.479465	0.932175	-0.220448
		1.9325	-0.657551	1.34232	0.125259	-0.841682	-0.813263	0.0432587	-0.242249	1.13544	-1.08543	-0.177231	-1.89559	0.115593	0.377472	-1.717	-0.838318	0.697632	-1.45463	-0.541168	-0.73164	0.349266	-1.87964	-1.16254	-0.532501	-1.43152	-0.428635	0.364536	-1.7179	-0.742096	-0.807503	-0.506416		1.9325	-0.574715	-0.201149	-0.870174	-0.537281	0.052887	-2.24765	0.389164	-0.968639	-1.33578	-0.816898	-0.0609322	-1.77671	0.502628	0.877541	-0.315361
		1.94274	-0.59716	1.25811	0.0746689	-0.96907	-0.81424	0.0694351	-0.173382	1.12637	-1.18531	-0.187759	-1.90056	0.0308723	0.36264	-1.73874	-0.816051	0.686928	-1.35693	-0.527039	-0.855927	0.299843	-1.79988	-1.10612	-0.481133	-1.29924	-0.422028	0.342018	-1.72999	-0.700253	-0.758499	-0.620476		1.94274	-0.344879	-0.214642	-0.817566	-0.484604	0.105946	-2.23885	0.396889	-0.938339	-1.29208	-0.847691	-0.0745811	-1.79693	0.625546	0.963669	-0.343494
		1.95298	-0.454277	1.18937	-0.0025177	-0.994972	-0.841549	0.0476189	-0.249794	1.22122	-1.05103	-0.176933	-1.91923	0.0185547	0.316032	-1.83698	-0.797276	0.739223	-1.34084	-0.488964	-0.811451	0.437923	-1.61186	-1.03945	-0.341873	-1.21657	-0.465733	0.368401	-1.73439	-0.609665	-0.709896	-0.662415		1.95298	-0.240414	-0.264675	-0.741917	-0.551491	0.014492	-2.13527	0.479824	-0.994034	-1.32164	-0.786251	-0.054924	-1.82131	0.656658	0.996513	-0.255077
		1.96322	-0.435284	1.22221	-0.0423241	-0.97715	-0.879482	0.0179253	-0.285046	1.12201	-0.955799	-0.19968	-1.93201	-0.0258026	0.206371	-1.91082	-0.809959	0.704201	-1.27715	-0.405994	-0.746101	0.627632	-1.48674	-1.03411	-0.275974	-1.24602	-0.395447	0.404747	-1.78389	-0.518719	-0.811783	-0.68647		1.96322	-0.323574	-0.385876	-0.652401	-0.669567	-0.0934525	-2.13622	0.511475	-0.987347	-1.30954	-0.760384	0.0415497	-1.89255	0.669533	1.02889	-0.161057
		1.97346	-0.429741	1.21464	-0.0653419	-0.857285	-0.79929	0.0658836	-0.299862	1.00016	-0.859325	-0.268272	-1.93608	-0.0667038	0.0826187	-1.98939	-0.78862	0.676079	-1.23926	-0.324944	-0.869244	0.802822	-1.5214	-1.04521	-0.333374	-1.23637	-0.334099	0.425201	-1.78656	-0.518314	-0.740116	-0.613026		1.97346	-0.288742	-0.681442	-0.618225	-0.666004	-0.293427	-2.23929	0.465973	-0.968723	-1.4345	-0.821705	0.0109138	-1.81196	0.673992	0.998112	-0.173538
		1.9837	-0.326839	1.28812	-0.144344	-0.829353	-0.855164	0.222797	-0.335697	0.9911	-0.865963	-0.279217	-1.86674	-0.0184937	0.0131454	-1.93298	-0.71899	0.671371	-1.26725	-0.253777	-0.915901	0.732967	-1.70063	-1.06814	-0.796753	-1.19654	-0.363365	0.400337	-1.75398	-0.457123	-0.569572	-0.648064		1.9837	-0.29903	-0.719769	-0.68956	-0.666683	-0.511211	-2.37644	0.52187	-1.01603	-1.43978	-0.88945	-0.0804596	-1.74226	0.609821	1.10204	-0.143486
		1.99394	-0.304714	1.3866	-0.124958	-0.818256	-0.807789	0.378937	-0.33007	1.09343	-0.790588	-0.382786	-1.80866	0.0831795	0.0656662	-1.93503	-0.760189	0.665257	-1.33997	-0.10585	-0.94965	0.743896	-1.90063	-1.09972	-1.01114	-1.0807	-0.385777	0.39769	-1.72636	-0.539436	-0.528782	-0.672939		1.99394	-0.365395	-0.563366	-0.77483	-0.66127	-0.655918	-2.46631	0.541454	-1.00834	-1.37996	-0.926537	-0.226433	-1.62273	0.652294	1.12963	0.0420265
		2.00418	-0.288395	1.40892	-0.0500603	-0.919991	-0.810078	0.444481	-0.216621	1.0831	-0.732819	-0.27639	-1.80854	0.15107	0.0775414	-1.94712	-0.786617	0.59174	-1.49577	-0.0334549	-0.756222	0.641544	-2.07761	-1.19336	-0.864487	-1.06333	-0.326519	0.400192	-1.7183	-0.640244	-0.575882	-0.451904		2.00418	-0.418587	-0.459377	-0.730675	-0.625759	-0.877277	-2.48528	0.511234	-1.0948	-1.37474	-0.906094	-0.340263	-1.57446	0.748508	1.178	0.165981
		2.01442	-0.43259	1.40226	-0.00780106	-0.964573	-0.911133	0.336094	-0.248688	1.06602	-0.63662	-0.204697	-1.79498	0.182957	0.158318	-2.0462	-0.863976	0.666054	-1.52597	-0.0823784	-0.692348	0.565834	-2.24697	-1.24668	-0.725895	-0.863247	-0.205093	0.420506	-1.68092	-0.686436	-0.648003	-0.348118		2.01442	-0.493591	-0.385921	-0.666195	-0.481922	-0.932747	-2.43599	0.568932	-1.08953	-1.41248	-0.791187	-0.276176	-1.58435	0.714619	1.19827	0.170464
		2.02466	-0.524525	1.44635	0.0875092	-0.948612	-1.04249	0.280174	-0.255112	1.05537	-0.62516	-0.171906	-1.63849	0.200649	0.295612	-1.8726	-0.89505	0.840885	-1.59827	-0.27124	-0.737301	0.479195	-2.35305	-1.22618	-0.60318	-0.778717	-0.214211	0.408646	-1.72437	-0.728432	-0.586658	-0.262264		2.02466	-0.59026	-0.393814	-0.660675	-0.40913	-0.883751	-2.34505	0.640434	-1.03182	-1.46894	-0.79916	-0.153	-1.51431	0.68409	1.09618	0.0541039
		2.0349	-0.438026	1.50469	0.121758	-0.907829	-1.03722	0.329906	-0.352066	1.05877	-0.628975	-0.197369	-1.53605	0.180241	0.256332	-1.78932	-0.854057	0.912708	-1.46106	-0.423233	-0.598125	0.475021	-2.333	-1.07076	-0.50415	-0.73555	-0.362221	0.338348	-1.66103	-0.755184	-0.621822	-0.189629		2.0349	-0.649506	-0.333469	-0.619465	-0.355595	-0.803238	-2.1746	0.707405	-0.943096	-1.55872	-0.96534	-0.0450058	-1.43155	0.631184	0.885563	-0.022892
[truncated: 1,266 more rows]
[truncated: 15 more columns]

## Sheet: panel C
		Ipsi latency (ms)	Contra latency (ms)	BF or CF (kHZ)	Principal cell
		5.3322	5.2605	5684	1
		6.1719	6.3255	437	1
		5.8339	5.9363	3249	0
		5.8749	6.0387	7500	0
		4.216	4.3184	1149	1
		4.8202	4.5847	3750	1
		5.5472	5.2707	3750	1
		5.3117	5.3731	2297	0
		4.6768	4.4208	4061	0
		5.5472	5.6701	7500	1
		5.0557	4.9123	12021	1
[truncated: 4 more rows]

## Sheet: panel D
	ITD (ms)	Spikes/click
[truncated: 32 more rows]

[truncated: 2 more sheets: panel E, panel F]
