# Supplementary material for: Glycinergic axonal inhibition subserves acute spatial sensitivity to sudden increases in sound intensity
Source: eLife journal article supplement (doi:10.7554/elife.62183), 2021-06-14
Supplement: supp [file elife-62183-supp-v1.zip › elife_poa_e62183_Figure_3_figure_supplement_1_source_data_1.xlsx]

## Sheet: panel A
	Ipsilateral responses																								Contralateral responses
	Sound level (dB)	Mean Vm rel (mV)	Vm rel (mV)	Vm rel (mV)	Vm rel (mV)	Vm rel (mV)	Vm rel (mV)	Vm rel (mV)	Vm rel (mV)	Vm rel (mV)	Vm rel (mV)	Vm rel (mV)	Vm rel (mV)	Vm rel (mV)	Vm rel (mV)	Vm rel (mV)	Vm rel (mV)	Vm rel (mV)	Vm rel (mV)	Vm rel (mV)	Vm rel (mV)	Vm rel (mV)	Vm rel (mV)		Sound level (dB)	Mean Vm rel (mV)	Vm rel (mV)	Vm rel (mV)	Vm rel (mV)	Vm rel (mV)	Vm rel (mV)	Vm rel (mV)	Vm rel (mV)	Vm rel (mV)	Vm rel (mV)	Vm rel (mV)	Vm rel (mV)	Vm rel (mV)	Vm rel (mV)	Vm rel (mV)	Vm rel (mV)	Vm rel (mV)	Vm rel (mV)	Vm rel (mV)	Vm rel (mV)	Vm rel (mV)	Vm rel (mV)
	10	-0.00286721	0.5758	1.27864	-0.88065	0.775173	2.78796	-0.501709	0.226749	0.144379	0.415524	1.18633	-0.172176	-0.180984	1.27957	1.17477	-0.529915	-0.487648	0.456009	0.534607	1.31777	2.86578	-0.174171		10	-0.00286721	0.189817	-0.372482	0.0462494	-0.728142	0.553749	0.108944	-1.08377	-1.33422	-0.0694656	0.16444	2.32193	2.57578	-0.139141	-0.231659	1.76572	-0.564632	0.301884	1.18472	-0.725182	0.704674	-0.683044
	10	0.0278529	0.621302	1.20937	-0.713997	0.825291	2.44144	-0.451019	0.527958	0.472816	0.663265	1.48159	0.0736809	-0.271297	1.06722	1.2356	-0.572166	-0.414642	0.53278	0.500744	1.30766	2.55248	-0.0427437		10	0.0278529	0.212447	-0.519539	0.200817	-0.90617	0.338718	0.28941	-0.964588	-1.28319	0.016716	0.371609	2.20335	2.77948	-0.294243	-0.479431	1.72192	-0.579487	0.498219	1.3398	-0.537392	0.648037	-0.595093
	10	0.058573	0.565212	1.18582	-0.458363	0.871544	2.33266	-0.598064	0.323425	0.532013	0.848278	1.54958	0.166988	-0.674725	0.947998	1.25931	-0.647919	-0.451088	0.319061	0.255135	0.862068	2.60261	0.077919		10	0.058573	0.167732	-0.273659	-0.0143433	-1.10928	0.550602	0.329227	-0.95454	-1.6688	-0.0760536	0.44223	2.13626	3.23107	-0.202068	-0.614899	1.54437	-0.539822	-0.0263863	1.11531	-0.425583	0.446049	-0.535057
	10	0.089293	0.675666	1.20644	-0.117828	0.920422	2.37418	-0.364044	0.393536	0.655502	1.10749	1.37775	0.636269	-0.349632	0.811813	1.24728	-0.641434	-0.15638	0.248714	0.204185	1.18371	2.6245	0.150852		10	0.089293	0.18048	-0.173569	0.504871	-1.12664	0.428261	0.290474	-0.929756	-1.4004	0.141464	0.608955	1.91977	3.37181	-0.321342	-0.581966	1.16734	-0.596889	-0.0148354	0.823345	-0.178192	0.108891	-0.431976
	10	0.120013	0.684797	1.17547	-0.183147	0.981064	1.91737	-0.221424	0.367367	0.572472	1.20936	1.28499	0.80069	-0.371647	1.18938	1.3682	-0.338428	0.00112152	0.0964279	0.277988	0.815903	2.54137	0.211411		10	0.120013	0.264448	-0.117134	0.465816	-1.22359	0.603878	0.317535	-0.577168	-1.189	0.281384	0.725986	1.87361	3.37769	-0.441681	-0.55965	1.22886	-0.401077	0.082489	0.882786	0.133492	0.037365	-0.212631
	10	0.150733	0.786739	1.1371	0.0900574	1.05912	1.92343	-0.0344086	0.476051	0.776737	1.28005	1.37423	1.07191	-0.371521	1.05413	1.58468	-0.518044	0.296856	0.204765	0.289917	0.817245	2.72683	0.495644		10	0.150733	0.239602	-0.186874	0.283371	-1.02998	0.551476	0.319118	-0.756332	-1.1735	0.441299	0.857197	1.77488	3.31224	-0.321804	-0.63805	1.41106	-0.515759	-0.0228119	0.905258	0.11039	-0.19017	-0.338989
	10	0.181453	0.787265	1.22589	0.164768	1.06645	1.98431	0.0693665	0.344978	0.580063	1.35406	1.30404	1.3692	-0.236034	0.81842	1.66201	-0.292095	0.31916	0.153481	0.261688	0.831184	2.55676	0.207588		10	0.181453	0.223838	-0.00238419	0.440155	-1.04316	0.532261	0.251446	-0.76973	-1.39737	0.515797	1.16646	1.89724	3.0635	-0.695599	-0.808235	1.15007	-0.129269	-0.381569	1.09907	0.0312729	-0.284466	-0.158722
	10	0.212173	0.804498	1.17832	0.314648	1.2083	2.11147	0.195251	0.439503	0.515514	1.77806	1.39272	1.69525	-0.207615	0.603771	1.44442	-0.444492	0.0236893	-0.161304	0.13353	1.07335	2.45048	0.345108		10	0.212173	0.207389	0.0889931	0.655407	-1.13191	0.668789	0.432358	-0.851055	-1.42436	0.325119	1.45679	1.59712	3.18003	-0.557854	-0.742073	0.68465	-0.390087	-0.494045	1.1371	0.367119	-0.475986	-0.378319
	10	0.242893	0.774579	1.3118	0.219864	0.974541	2.07804	0.433846	0.333344	0.746735	1.50639	1.22297	2.00231	-0.384808	0.555214	1.44947	-0.349873	0.25034	-0.231724	0.0322495	0.643929	2.28766	0.409286		10	0.242893	0.18856	0.020401	0.587021	-1.19635	0.616619	0.262772	-0.402409	-1.67958	0.285519	1.10226	1.66069	3.17359	-0.775349	-0.658577	0.86623	-0.349209	-0.762695	1.00431	0.629562	-0.37093	-0.242668
	10	0.273614	0.886675	1.33403	0.663143	0.827953	2.43073	0.667702	0.669865	0.980503	1.53693	1.4777	2.42432	-0.444748	0.600872	1.60136	-0.337997	0.375309	-0.201214	0.0148544	0.726311	2.13629	0.249596		10	0.273614	0.146929	0.0213623	0.728596	-1.17833	0.380672	0.333759	-0.688965	-1.57702	0.461685	1.08775	1.35102	3.18563	-0.725937	-0.901886	0.638573	-0.356525	-0.576382	0.945885	0.556759	-0.570496	-0.177574
	10	0.304334	0.88173	1.28207	0.570461	0.780674	2.26312	0.71088	0.586464	0.962334	1.49057	1.38257	2.59824	-0.486042	0.491474	1.54742	-0.173038	0.319569	-0.147705	0.229256	0.720345	2.23921	0.266724		10	0.304334	0.112564	0.41534	0.82745	-1.21886	0.607601	0.252506	-0.525398	-1.7963	0.420738	0.794388	1.30913	3.3785	-1.10861	-0.718246	0.0622826	-0.28194	-0.686817	0.760761	0.746197	-0.790985	-0.196457
	10	0.335054	0.838633	1.33152	0.688679	0.699753	2.19724	0.901196	0.373726	0.728363	1.65643	1.16161	2.7767	-0.414661	0.45105	1.50129	0.0182304	0.219406	-0.40472	0.183823	0.533409	2.00468	0.164932		10	0.335054	0.0868338	0.0358238	0.750149	-1.44992	0.600971	0.251072	-0.685452	-1.67032	0.496517	0.943241	1.0428	3.18126	-0.978329	-0.925072	-0.000102997	0.0128174	-0.347347	0.966839	0.703876	-0.963291	-0.228855
	10	0.365774	0.817815	1.3541	0.506851	0.66288	2.25903	1.06228	0.462521	0.702183	1.7163	1.12149	2.91491	-0.607586	0.29591	1.16821	0.0653801	0.225082	-0.596123	0.257782	0.49823	1.94577	0.341103		10	0.365774	0.0775169	0.23531	0.697384	-1.34636	0.706314	0.0357246	-0.641018	-1.80831	0.581635	0.695229	1.25642	3.33228	-1.23587	-1.11267	-0.170914	0.216679	-0.670723	0.972992	0.755398	-0.99165	0.0424805
	10	0.396494	0.891698	1.27834	0.560982	0.498608	2.50064	1.09203	0.0765915	0.607998	2.09313	1.22852	3.21202	-0.456398	0.31929	1.97581	0.0897827	0.546543	-0.558056	0.0705719	0.577793	1.60987	0.509911		10	0.396494	0.119465	0.202583	0.699459	-1.24982	0.65836	0.0908012	-0.69241	-1.82434	0.421345	0.894356	1.01778	3.37806	-1.08574	-1.07309	-0.048027	0.379028	-0.82106	0.932041	1.13101	-0.771721	0.150696
	10	0.427214	0.817203	0.966091	0.44622	0.418739	2.73856	1.14252	-0.0774994	0.608688	1.98315	1.1026	3.19133	-0.422684	0.335701	1.61389	0.131996	0.653236	-0.673496	0.322357	0.268478	1.30745	0.286743		10	0.427214	0.120696	0.431297	0.73875	-1.00975	0.631283	-0.0885048	-0.500603	-1.94347	0.494267	0.807678	0.659176	3.41256	-1.13213	-0.747429	0.210732	0.293427	-0.802128	0.788242	0.985378	-0.953182	0.138332
	10	0.457934	0.835283	0.986675	0.87883	0.560265	2.87588	1.2989	0.0307693	0.46106	2.44268	1.0043	3.17609	-0.354317	0.225067	1.15108	0.0800667	0.286198	-0.657856	0.392834	-0.0209007	1.48079	0.407249		10	0.457934	0.08778	0.129486	0.779575	-0.816071	0.452755	0.176044	-0.774143	-1.92514	0.705719	0.86211	0.746601	3.17627	-1.04731	-1.01889	0.00766754	0.250591	-1.03724	0.833813	1.14394	-0.888283	-0.00189209
	10	0.488654	0.816364	0.950462	0.766609	0.420994	2.84608	1.37678	0.02314	0.512115	2.28592	0.760578	3.18956	-0.830784	0.0269508	1.14128	0.361328	0.636688	-0.630249	0.526016	0.162609	1.45685	0.344345		10	0.488654	0.0142612	0.0466003	0.616978	-0.896141	0.415611	-0.115734	-0.704151	-2.15545	0.7715	0.727512	0.394745	3.09174	-1.00111	-1.00011	-0.108616	0.420059	-1.09709	0.887901	1.11944	-1.03211	-0.0963516
	10	0.519374	0.755145	0.948124	0.46756	0.176903	3.17849	1.30952	-0.233757	0.632515	2.01598	0.737545	3.07233	-0.931755	-0.0712395	1.09038	0.584156	0.528812	-0.882473	0.26696	0.0971489	1.64006	0.475639		10	0.519374	0.0186186	-0.0932541	0.703068	-0.851284	0.220692	-0.0198898	-0.758606	-2.16732	0.680195	0.758888	0.173859	2.89302	-0.982296	-0.899803	-0.173561	0.294292	-0.998142	1.13672	1.28436	-0.982433	0.15387
	10	0.550094	0.735046	0.812489	0.242157	-0.121304	3.17149	1.21485	0.070549	0.59692	2.35259	0.857254	2.9871	-0.787498	-0.197735	0.720127	0.718563	0.626915	-1.04784	0.482632	0.0398254	1.35213	0.609703		10	0.550094	0.0232704	-0.00642395	0.425884	-0.676151	0.147167	-0.123325	-0.780445	-2.07782	0.926529	0.609135	0.237007	2.77789	-0.949383	-1.0668	-0.354248	0.391918	-1.04696	1.14063	1.64458	-1.21621	0.462429
	10	0.580814	0.637255	0.785786	0.0581207	-0.0456123	3.03443	1.29878	-0.250839	0.274769	2.2043	0.448257	2.64168	-0.909546	-0.340691	0.555367	0.829617	0.763241	-1.14111	0.591125	0.0305367	1.31217	0.604729		10	0.580814	0.0343388	-0.0476913	0.517387	-0.753937	0.181713	-0.00909042	-0.760918	-2.24043	0.828411	0.870239	0.081295	2.9333	-0.968609	-0.937469	-0.559967	0.282681	-1.03154	1.4418	1.70502	-1.16093	0.315502
	10	0.611534	0.590717	0.559063	0.0594177	-0.36953	3.02025	1.30031	-0.178944	0.233063	2.05007	0.204155	2.36478	-0.99826	-0.321175	0.514835	0.828308	0.846569	-0.961521	0.832939	-0.171238	1.30519	0.696068		10	0.611534	0.0188505	-0.0698318	0.24614	-0.64547	0.404812	-0.205959	-0.694557	-2.35781	1.10984	0.799587	-0.0746765	2.88245	-0.855526	-1.02491	-0.573463	0.255375	-1.01467	1.46747	1.7184	-1.3206	0.330418
	10	0.642254	0.560431	0.393936	0.111897	-0.649792	3.29673	0.923882	-0.775429	-0.0766907	2.12254	-0.0701675	2.38731	-1.08976	-0.163403	0.827728	1.02232	0.794022	-0.969757	1.04043	-0.114983	1.36193	0.835876		10	0.642254	0.0729053	-0.0808945	0.158226	-0.439274	0.473595	0.0525551	-0.835964	-2.13327	1.49325	0.734341	-0.0541153	2.69088	-1.06628	-0.867901	-0.4842	0.0256424	-0.911503	1.66187	1.91691	-1.09855	0.222794
	10	0.672975	0.584586	0.254459	0.138123	-0.505611	3.13859	1.07183	-0.555298	0.189178	2.19087	0.135166	2.44304	-1.25699	-0.47187	0.615425	1.38713	0.591507	-0.900829	1.02313	-0.289757	1.39724	1.0964		10	0.672975	0.0552515	-0.291359	0.0568581	-0.260849	0.618649	0.0112152	-0.661892	-2.27132	1.71511	0.62027	-0.265388	2.55838	-1.11345	-0.657021	-0.79549	0.160542	-0.673012	1.68354	1.83952	-1.38758	0.2183
	10	0.703695	0.541102	0.2878	0.517159	-0.568264	3.01112	1.0392	-0.491951	-0.0589905	2.20879	-0.0319977	2.15697	-1.07185	-0.274818	0.542923	1.47359	0.379326	-1.16046	0.942963	-0.300446	1.15629	1.06469		10	0.703695	0.0232422	-0.312996	0.025547	-0.0517502	0.661671	0.216827	-0.834366	-2.22529	1.71233	0.616455	-0.351425	2.33817	-0.923347	-0.899776	-0.759346	-0.00156021	-0.962727	1.65887	1.54125	-1.42189	0.43819
	10	0.734415	0.557678	0.2981	0.746174	-0.448399	2.96281	1.1571	-0.5527	-0.16753	1.89643	-0.0687752	1.71896	-1.18124	-0.295998	0.692886	1.37191	0.548927	-1.21595	1.15694	-0.175507	1.389	1.3204		10	0.734415	0.0778303	-0.372169	-0.0350266	-0.118111	0.820278	0.200005	-1.09565	-2.0881	1.91962	0.767899	-0.286678	2.50417	-0.769188	-0.90284	-0.753983	-0.0737038	-0.886444	1.86685	1.72872	-1.58751	0.718468
	10	0.765135	0.466924	0.138279	0.711758	-0.622051	2.91207	0.94236	-0.688503	-0.352222	1.94456	-0.422424	1.48969	-1.29705	-0.253059	0.901932	1.59337	0.387932	-1.04472	1.04504	-0.255314	1.27215	0.9347		10	0.765135	0.0311615	-0.582253	-0.105728	-0.167645	0.564407	0.556549	-1.09725	-2.21284	2.04734	0.800632	-0.182369	2.60981	-1.00872	-1.3039	-0.819618	0.0274696	-0.678974	1.71749	1.43132	-1.44343	0.47094
	10	0.795855	0.470637	0.23801	0.383789	-0.726646	2.67987	0.854145	-0.544235	-0.143021	1.84197	-0.433399	1.43761	-1.37027	-0.173904	0.761612	1.66501	0.36552	-1.00814	1.13239	-0.12764	1.33931	1.24075		10	0.795855	0.0697302	-0.345383	-0.110867	-0.232788	0.642178	0.7075	-0.744553	-2.34177	2.39156	0.719738	-0.419334	2.48963	-0.886463	-0.453793	-1.03344	-0.227604	-1.00132	2.0491	1.42898	-1.68639	0.449627
	10	0.826575	0.424374	0.148125	0.360447	-1.0482	2.49375	0.703728	-0.436722	-0.237934	1.68605	-0.646488	0.955605	-1.34649	-0.0799789	0.640877	1.93621	0.244774	-0.847557	1.36972	-0.259499	1.41467	1.43638		10	0.826575	0.0534002	-0.246906	-0.369793	-0.0273895	0.868309	0.865467	-0.858528	-2.11733	2.31662	0.802017	-0.70879	2.34846	-1.02062	-0.920425	-0.92017	-0.301643	-0.980999	1.90343	1.30966	-1.47491	0.601547
	10	0.857295	0.345792	0.00154495	0.157875	-0.925991	2.37402	0.688381	-0.668167	-0.297459	1.46476	-0.697701	0.769352	-1.39009	-0.182884	0.571712	2.18722	-0.0909653	-1.05502	1.5002	-0.419243	1.2858	1.64249		10	0.857295	-0.0223974	-0.449287	-0.534859	-0.014183	1.0364	0.821171	-1.30468	-2.19997	2.243	0.939705	-1.20315	2.60188	-0.942074	-1.19459	-1.13874	-0.471516	-0.67337	1.80587	1.33531	-1.4144	0.30954
	10	0.888015	0.309799	0.105412	-0.143364	-0.928574	2.08571	0.490803	-0.797077	-0.265781	1.42292	-0.656574	0.607109	-1.36993	-0.438873	0.569996	2.27686	-0.0928726	-0.915508	1.50513	-0.302132	1.40649	1.63625		10	0.888015	-0.0646522	-0.329445	-0.612679	-0.20182	1.02322	1.04148	-1.07561	-1.95354	2.24002	0.694286	-1.37782	2.49252	-1.01088	-1.33874	-1.27801	-0.627705	-0.908642	1.7594	1.11105	-1.32802	0.387886
	10	0.918735	0.305939	0.0347824	-0.285213	-0.605747	1.84419	0.498352	-0.629818	-0.571007	1.29689	-0.627151	0.559433	-1.45451	-0.595345	0.639767	2.32616	-0.0529022	-0.639164	1.6331	-0.399929	1.51902	1.62787		10	0.918735	-0.0823456	-0.479626	-0.454941	-0.224159	1.34555	0.733131	-1.10144	-1.9366	2.17579	0.506245	-1.34533	2.54182	-0.718498	-1.01933	-1.70104	-0.309071	-1.19919	1.67672	1.03823	-1.25036	0.0751877
	10	0.949455	0.310659	-0.0743561	-0.268597	-0.61274	1.8298	0.421822	-0.538216	-0.623138	1.28709	-0.654602	0.37899	-1.2635	-0.493492	0.774895	2.5237	-0.148712	-0.464848	1.57592	-0.53001	1.47273	1.62045		10	0.949455	-0.0147116	-0.374889	-0.40839	-0.179787	1.54915	0.873371	-1.06445	-1.62657	2.13046	0.506546	-1.31173	2.74843	-0.435448	-1.19904	-1.51318	-0.159809	-1.18808	1.53091	1.02448	-1.25455	0.058342
	10	0.980175	0.291526	-0.116615	-0.105885	-0.549145	1.62416	0.233589	-0.796021	-0.793442	1.44085	-0.894928	0.175999	-1.22476	-0.401775	0.761635	2.42154	-0.47818	-0.207272	2.00051	-0.409142	1.50014	1.64927		10	0.980175	-0.0312193	-0.233757	-0.337734	-0.115215	1.94418	0.898998	-1.01688	-1.5591	1.93937	0.634823	-1.39143	2.53374	-0.428104	-1.29312	-1.62646	-0.377644	-1.06017	1.3826	0.885345	-1.34656	-0.0572662
	10	1.0109	0.185441	-0.469212	-0.254196	-0.772648	1.53745	0.205372	-0.694717	-0.912601	1.28712	-1.16713	-0.286343	-1.15873	-0.52599	0.345985	2.46667	-0.736809	-0.29644	2.25833	-0.20887	1.3288	1.76279		10	1.0109	-0.0300411	-0.264072	-0.579765	0.00534439	2.01678	0.724659	-0.92514	-1.51813	2.0351	0.452019	-1.21753	2.46794	-0.438499	-1.32594	-1.7513	-0.489658	-0.928905	1.52671	0.666454	-1.16191	0.105003
	10	1.04162	0.208564	-0.376026	-0.194172	-0.804428	1.83063	0.240681	-0.45578	-1.31253	1.34343	-1.27198	-0.378052	-1.19302	0.0719643	0.549667	2.2422	-0.677204	-0.498474	2.04419	-0.232391	1.30185	1.94073		10	1.04162	-0.0435001	-0.718937	-0.975327	-0.110687	2.21503	0.59565	-0.937435	-1.49038	2.19383	0.558521	-1.18215	2.46171	-0.258755	-1.18713	-1.72847	-0.70779	-1.11966	1.51376	0.765316	-0.759678	0.00256729
	10	1.07234	0.120233	-0.309853	-0.28772	-0.677677	1.43744	-0.0721245	-0.629868	-1.28421	1.09282	-1.32181	-0.452137	-1.44158	0.0702591	0.478786	2.19901	-0.658783	-0.234879	1.93495	-0.314823	1.12529	1.75155		10	1.07234	-0.0755138	-0.892338	-0.966587	-0.241562	2.31676	0.321194	-0.976604	-1.12313	1.72916	0.257778	-1.25044	2.41472	-0.0212784	-1.40838	-1.48644	-0.86895	-0.909611	1.46743	0.62323	-0.509808	0.0145836
	10	1.10306	0.150943	-0.220257	-0.19149	-0.382801	1.19302	-0.0872498	-0.589214	-1.54713	1.28159	-1.44576	-0.505417	-1.01961	0.0195122	0.690979	2.34314	-1.01517	-0.251118	2.29287	-0.49091	1.08352	1.86036		10	1.10306	-0.0653578	-0.710987	-1.0168	0.0889816	2.67878	0.1376	-1.1211	-0.985432	1.60616	0.252724	-1.18946	2.30619	0.326466	-1.44781	-1.54925	-0.915253	-0.931305	1.1344	0.701981	-0.552223	-0.120815
	10	1.13378	0.0908026	-0.682468	-0.411552	-0.396614	0.996235	-0.157585	-0.507698	-1.7233	1.19868	-1.51195	-0.865234	-1.05615	0.100254	0.367603	2.25848	-1.1505	0.173199	2.43807	-0.235565	0.79438	2.18776		10	1.13378	-0.0429646	-0.797234	-1.13081	0.245312	2.73781	0.212631	-1.01047	-0.722218	1.50124	0.193478	-1.23333	2.08346	0.382328	-1.23898	-0.961128	-1.002	-0.83094	0.933163	0.552338	-0.588017	-0.185917
	10	1.1645	0.0411758	-0.636341	-0.341206	-0.527126	0.713566	-0.215366	-0.507507	-2.12894	1.30109	-1.51772	-0.91819	-0.997166	0.510166	0.451797	2.10167	-1.91428	0.0842285	2.63703	-0.203053	0.608032	2.32284		10	1.1645	-0.00323238	-0.799751	-1.30191	0.355938	2.7795	0.159737	-0.971561	-0.558979	1.44379	0.688633	-1.44481	1.94426	0.356045	-1.11307	-0.937336	-0.985378	-0.514107	0.986877	0.73307	-0.488781	-0.396809
	10	1.19522	0.0468187	-0.536968	-0.577827	-0.556831	0.970016	-0.201	-0.677536	-2.24529	1.22248	-1.53577	-0.984432	-1.16155	0.418983	0.220261	1.87319	-1.44796	0.469097	2.52311	0.163239	0.626331	2.37484		10	1.19522	-0.0589605	-1.28415	-1.32455	0.183632	3.02638	0.0897598	-1.1514	-0.256916	1.41883	0.526127	-1.43979	2.13552	0.468586	-1.36003	-1.05198	-1.20362	-0.276249	0.479904	0.789883	-0.545116	-0.40403
	10	1.22594	0.0993933	-0.616364	-0.557442	-0.535625	1.09647	-0.230587	-0.483883	-2.23915	1.36403	-1.71387	-0.964378	-1.10766	0.329407	0.823624	1.55345	-1.2856	0.44894	2.53996	0.414486	0.498646	2.65341		10	1.22594	-0.0146156	-1.24863	-1.39803	0.196125	3.04146	0.340408	-1.07853	-0.37553	1.21394	0.477528	-1.3937	2.01685	0.584927	-1.20172	-0.830574	-1.27971	-0.273209	0.457436	1.01784	-0.266178	-0.293022
	10	1.25666	0.0702829	-0.741486	-0.791122	-0.459141	0.850082	-0.463261	-0.475918	-2.06966	1.28495	-1.63937	-1.09858	-0.95195	0.638493	0.514786	1.50386	-1.27313	0.553463	2.3854	0.623451	0.417145	2.59764		10	1.25666	-0.0428879	-1.16143	-1.5728	0.332264	3.11245	0.117176	-1.32747	-0.168808	1.13841	0.317204	-1.24919	1.92603	0.721859	-1.72797	-0.866421	-0.995502	-0.22871	0.414314	0.778393	-0.211746	-0.205811
	10	1.28738	-0.00326843	-0.938564	-0.462551	-0.42141	0.691895	-0.614441	-0.261662	-2.39735	1.29186	-1.6874	-1.64874	-0.815178	0.6991	0.330315	1.22396	-1.50584	0.45137	2.48356	0.603168	0.0427895	2.86974		10	1.28738	-0.0346664	-1.20034	-1.41484	0.211193	2.99759	0.296803	-1.11568	-0.314339	1.08718	0.242592	-1.10506	2.05493	0.54237	-1.45656	-0.783092	-1.10065	-0.272198	0.101559	0.559704	0.0218887	-0.0463715
	10	1.3181	0.00113525	-0.816746	-0.612286	-0.314304	0.902878	-0.787144	-0.255676	-2.2546	1.18821	-1.6647	-1.65917	-0.625111	0.780773	0.260754	0.988358	-1.64541	0.50034	2.50564	0.833504	-0.0972443	2.79464		10	1.3181	-0.0187752	-1.1446	-1.44236	0.310863	2.93627	0.19878	-1.26221	-0.0442581	1.26573	0.424553	-1.21775	1.75032	0.490368	-1.25087	-0.80014	-0.788818	-0.0740814	-0.0589066	0.510017	0.0937233	-0.272129
	10	1.34882	-0.0415344	-0.676434	-0.813629	-0.269394	-0.173889	-0.696331	-0.41431	-2.31896	1.32609	-1.71086	-1.30025	-0.783436	0.852928	0.366028	0.705463	-1.72596	0.565136	2.78384	0.785393	-0.121624	2.78952		10	1.34882	0.015926	-1.17682	-1.4804	0.127296	3.10078	0.309559	-1.32604	0.451756	1.15001	0.358822	-1.16265	1.45983	0.665474	-1.22372	-0.579723	-0.84042	-0.0618858	0.00776291	0.378746	0.100735	0.0594177
	10	1.37954	0.0218727	-1.03207	-0.848	-0.206203	0.353443	-0.919308	-0.277588	-2.31675	1.46293	-1.30658	-1.06428	-0.838604	1.12675	0.226242	0.541489	-1.66095	0.494667	2.83504	1.22376	-0.215252	2.85872		10	1.37954	-0.0135473	-1.45932	-1.43767	0.563801	3.06633	0.0822182	-1.18136	0.42503	1.05836	0.160969	-1.17388	1.26321	0.690029	-1.30567	-0.38324	-0.94429	-0.222675	0.19923	0.180069	0.0764542	0.0714569
	10	1.41026	0.0142357	-0.915794	-0.879234	-0.220852	0.428391	-0.874569	0.182941	-2.47558	1.25309	-1.1674	-1.28339	-0.707405	1.04426	0.213417	0.395576	-1.67602	0.344692	2.75593	1.23521	-0.252895	2.88435		10	1.41026	0.036412	-1.3051	-1.27111	0.7952	2.83334	0.0575867	-1.20699	0.45314	0.944378	0.488522	-0.878433	1.3711	0.514927	-1.09233	-0.444515	-0.716434	-0.17416	0.117165	0.0219383	0.1404	0.0796242
	10	1.44098	0.0531786	-1.19835	-0.916794	0.00813675	0.609528	-0.89344	0.422981	-2.25644	1.22487	-1.11604	-1.1615	-0.701969	1.17268	0.0565605	0.332386	-2.06207	0.778553	2.69802	1.33031	-0.230724	2.96685		10	1.44098	0.0538462	-1.3615	-0.997246	0.88221	2.76667	0.101276	-1.37876	0.499527	1.10885	0.382576	-0.662609	1.10464	0.855698	-1.04183	-0.423355	-0.764118	0.0109634	-0.039669	-0.119858	0.380962	-0.227509
	10	1.4717	-0.023111	-1.04106	-1.10143	-0.211006	0.367836	-1.06099	0.329124	-2.4557	1.21854	-1.17447	-1.17597	-0.792671	0.840958	0.257248	0.0508118	-1.98695	0.651608	2.70338	1.40098	-0.459915	3.17745		10	1.4717	0.0611614	-1.66777	-0.85149	0.713577	2.68063	0.177227	-1.37132	0.258606	1.02094	0.578094	-0.59325	1.11532	0.489986	-0.686165	-0.292675	-0.724995	0.220924	0.117649	-0.0878143	0.376026	-0.250275
	10	1.50242	0.0358286	-1.08687	-1.13235	-0.242619	0.414646	-1.03052	0.599255	-2.40017	1.30776	-0.700226	-0.922871	-0.659031	0.820644	0.177902	-0.0966377	-2.25241	0.698967	2.65172	1.60229	-0.328297	3.29539		10	1.50242	0.0599379	-1.71049	-0.920906	0.938545	2.72434	0.208279	-1.4775	0.248623	0.895309	0.502445	-0.760242	1.23071	0.5471	-0.616806	-0.101749	-0.896641	0.290844	0.271351	-0.128967	0.393314	-0.438793
	10	1.53314	0.0291058	-1.24385	-1.29279	-0.206856	0.260078	-1.28038	0.676373	-2.1617	1.65287	-0.644676	-0.923027	-0.622337	0.332481	0.327549	-0.195854	-2.00008	0.393124	2.73518	1.52649	-0.203579	3.45311		10	1.53314	0.082583	-1.76759	-0.523285	0.950459	2.5012	-0.0818634	-1.16234	0.558117	0.782394	0.621178	-0.660679	0.968338	0.230564	-0.384518	0.186817	-0.87764	0.500748	0.0785255	-0.555759	0.489239	-0.202248
	10	1.56386	0.0373125	-1.335	-1.30461	0.103779	0.273956	-1.068	0.927414	-2.29575	1.6455	-0.55999	-0.858952	-0.673668	0.633907	0.224384	-0.311726	-2.31234	0.181839	2.77182	1.47612	-0.174339	3.40189		10	1.56386	0.119732	-1.8095	-0.501659	1.23998	2.46254	0.23455	-1.29704	0.0483437	1.11282	0.443958	-0.555996	0.924564	0.314354	-0.327263	0.237019	-0.998032	0.665337	0.29985	-0.561401	0.823658	-0.361443
	10	1.59458	0.0118656	-1.40583	-1.38123	0.0932045	0.304043	-1.28189	0.986366	-2.43918	1.78882	-0.75132	-1.08929	-0.761368	0.387764	0.257523	-0.31076	-2.02752	0.521526	2.67871	1.56816	-0.0819588	3.18155		10	1.59458	0.2098	-1.81676	-0.21904	1.17712	2.41215	0.257191	-1.25518	0.205303	1.03475	0.468136	-0.444702	1.07635	0.359558	-0.167191	0.381821	-0.966034	0.844334	0.451546	-0.406723	0.99905	-0.195702
	10	1.6253	0.0198385	-1.3248	-1.4429	0.265697	0.0677109	-1.41237	1.11748	-2.28204	1.8478	-0.52039	-0.709747	-0.669052	0.35672	0.211937	-0.343792	-2.32966	0.142849	2.39024	1.78507	0.14542	3.10061		10	1.6253	0.217603	-1.77752	-0.438847	1.29882	2.5957	0.117477	-1.2862	0.304142	1.03146	0.387192	-0.564819	0.863758	0.580906	-0.165028	0.568157	-0.879704	0.822884	0.626556	-0.472446	1.15873	-0.419163
	10	1.65602	-0.018198	-1.36814	-1.49615	0.0154076	-0.0843658	-1.48597	1.05561	-2.20922	1.85171	-0.509636	-0.773716	-0.781944	0.193405	0.263088	-0.409	-2.26203	0.170586	2.43847	1.60734	0.00942612	3.41118		10	1.65602	0.221368	-1.82085	-0.34626	1.44098	2.44473	-0.0968132	-1.39327	0.226131	1.05213	0.398884	-0.402325	0.706364	0.428429	-0.256798	0.992996	-1.00225	1.11063	0.712959	-0.510834	1.32122	-0.578697
	10	1.68674	0.0665573	-1.43273	-1.40089	0.237423	-0.0944023	-1.07151	1.29903	-2.00859	1.8015	-0.627655	-0.738003	-0.403168	0.398357	0.0909042	-0.200851	-2.17383	0.30397	2.07848	1.53163	0.115841	3.62565		10	1.68674	0.25631	-1.90979	-0.213173	1.60714	2.39035	0.187939	-1.43733	0.200417	0.871994	0.639141	-0.607735	0.53791	0.527466	-0.362717	1.10004	-1.37168	1.26826	1.11144	-0.452347	1.74006	-0.701195
	10	1.71746	0.0311691	-1.3818	-1.45319	0.0582161	-0.234306	-1.19007	1.08537	-1.941	1.86319	-0.490658	-1.10023	-0.301163	0.122547	0.262627	-0.291737	-1.99522	0.267048	2.2243	1.67423	-0.045578	3.49081		10	1.71746	0.290717	-1.85908	-0.116028	1.74051	2.13565	0.198837	-1.37269	0.184299	0.757729	0.384792	-0.527958	0.826786	0.249615	-0.438114	1.39118	-0.742519	1.32099	1.16176	-0.499447	1.67885	-0.660809
	10	1.74818	0.0207745	-1.37494	-1.38676	0.221725	-0.241459	-1.29342	1.0877	-1.5813	1.82668	-0.675217	-1.0744	-0.359314	0.283798	0.335831	-0.490913	-2.22652	0.299187	1.99088	1.46666	-0.101917	3.70918		10	1.74818	0.359821	-1.84215	-0.308502	1.74815	1.67036	0.378571	-1.3933	0.229614	0.868141	0.611103	-0.431461	0.668324	0.539028	-0.35276	1.14268	-0.302254	1.53518	1.57792	-0.573441	1.9599	-0.528667
	10	1.7789	0.0395155	-1.4818	-1.84446	0.420113	-0.308311	-1.26775	1.27583	-1.50781	2.06984	-0.534203	-1.06952	-0.259712	0.0831604	0.43412	-0.659832	-2.09744	0.221931	2.12355	1.40744	0.0977669	3.6874		10	1.7789	0.328309	-2.44022	0.260651	2.04781	2.01137	0.105915	-1.40512	0.0416451	0.660503	0.462296	-0.666599	0.798725	0.349045	-0.409111	1.18107	-0.349113	1.63009	1.35983	-0.663136	2.08365	-0.493118
	10	1.80962	0.00187035	-1.37255	-1.90926	0.261169	0.0544891	-1.18722	1.01501	-1.7495	2.17668	-0.720383	-1.00655	-0.303627	0.000141144	0.16404	-0.678688	-1.9229	-0.0952034	2.01418	1.50645	0.353043	3.43809		10	1.80962	0.360785	-2.14634	-0.0349083	1.98124	2.39601	0.174278	-1.4446	-0.0551071	0.762966	0.442623	-0.484566	0.499844	0.183891	-0.549564	1.39591	-0.313053	1.67518	1.61657	-0.835949	2.49736	-0.546097
	10	1.84034	0.0102768	-1.38863	-1.98272	0.162884	0.0947113	-1.29202	1.26625	-1.6088	2.31071	-0.51923	-1.13106	-0.457756	0.118088	0.157566	-0.672253	-1.98619	0.0954819	1.94835	1.28228	0.350826	3.45703		10	1.84034	0.402987	-2.15376	0.0531158	2.36222	2.34303	0.139103	-1.58496	-0.187859	0.63155	0.474869	-0.690845	0.544094	0.25684	-0.705952	1.43806	0.197891	1.64558	2.03233	-0.631531	2.41963	-0.523659
	10	1.87106	-0.0105982	-1.17132	-1.77551	0.233524	-0.0132446	-1.17758	1.11493	-1.47138	2.25552	-1.04198	-1.12784	-0.523655	0.393162	0.216492	-0.596413	-2.13683	-0.184048	1.86117	1.30419	0.300011	3.32883		10	1.87106	0.397483	-2.34962	0.202881	2.16826	2.5547	0.217854	-1.53901	-0.298649	0.493202	0.586163	-0.606056	0.628113	0.174488	-0.247704	1.64811	0.200039	1.27695	1.95898	-0.722168	2.39003	-0.7869
	10	1.90178	0.0188658	-1.16182	-1.50528	0.390701	0.176338	-1.33503	1.30997	-1.20699	2.16078	-1.12085	-0.947109	-0.464169	0.262115	0.470505	-0.757355	-2.07656	-0.158371	1.77512	1.17463	0.0278397	3.36284		10	1.90178	0.400824	-2.60955	0.103149	1.93966	2.99599	0.199863	-1.31742	-0.138088	0.375092	0.603497	-0.78022	0.479675	0.152363	-0.521439	1.38863	0.458244	1.70591	2.07308	-0.741653	2.48931	-0.839588
	10	1.9325	-0.0273735	-1.02542	-1.47524	0.38269	0.206352	-1.25235	1.05846	-1.34748	2.16043	-1.39399	-1.1403	-0.569012	0.281166	0.531349	-0.509674	-2.01492	-0.434212	1.52303	0.910229	-0.0566406	3.61805		10	1.9325	0.396122	-2.49234	0.0472908	1.7802	2.77548	-0.0238457	-1.38454	-0.219402	0.497726	0.618603	-0.629921	0.452938	0.155415	-0.529236	1.44721	0.627293	1.36126	2.17353	-0.71225	2.88005	-0.903019
	10	1.96322	-0.00472755	-1.04861	-1.53725	0.409489	0.253357	-1.41386	1.08456	-1.25219	2.23486	-1.33548	-1.32751	-0.392502	0.0871277	0.512512	-0.757179	-2.15919	-0.509895	2.15085	0.99865	0.446468	3.46125		10	1.96322	0.358053	-2.68903	0.197453	1.88927	2.91285	0.224957	-1.56057	-0.492317	0.118328	0.607014	-0.615116	0.360218	0.065506	-0.832542	1.36594	0.877491	1.59862	2.17748	-0.631721	2.47193	-0.884682
	10	1.99394	-0.0609676	-1.03293	-1.47755	0.29995	0.445427	-1.33386	0.900749	-1.17606	2.03168	-1.27604	-1.28633	-0.541084	-0.0790596	0.792511	-0.596436	-2.14603	-0.680855	1.61132	0.843891	0.102753	3.3786		10	1.99394	0.313003	-2.8645	0.0780678	1.91534	2.64885	0.214516	-1.4735	-0.554665	0.0224457	0.57336	-0.386936	0.108288	-0.285721	-0.958866	1.27602	1.15626	1.60711	2.41267	-0.829861	2.40333	-0.802166
	10	2.02466	-0.040703	-1.02847	-1.39674	0.232845	0.716545	-1.20288	1.12133	-1.24957	2.01906	-1.36857	-1.34529	-0.603821	0.0502319	0.868649	-0.626438	-2.09563	-0.72607	1.6151	0.844997	0.0519676	3.3087		10	2.02466	0.325162	-2.69144	0.0481453	2.05665	2.88714	0.302288	-1.64406	-0.236088	-0.0120277	0.504639	-0.371212	0.181759	-0.0617027	-1.03721	1.18235	1.22922	1.27143	2.40611	-0.992592	2.5099	-1.03006
	10	2.05538	-0.0908453	-1.18737	-1.44718	0.127537	0.637463	-1.42849	0.840668	-0.98563	1.8114	-1.46615	-1.25269	-0.594307	0.162395	0.836655	-0.667923	-2.01344	-0.805454	1.48709	0.722061	0.177509	3.22895		10	2.05538	0.358054	-2.56081	0.132641	2.00898	2.82949	0.240559	-1.67603	-0.414322	0.111797	0.288963	-0.255127	0.100914	0.0155678	-1.00467	1.26321	1.45382	1.16191	2.70551	-0.803692	2.59364	-1.03128
	10	2.0861	-0.0482985	-1.07061	-1.16039	0.00539398	0.726067	-1.55224	1.0022	-0.752148	1.52715	-1.46394	-1.18344	-0.254002	0.1096	1.00493	-0.827797	-1.90892	-0.530376	1.48772	0.689526	-0.0508232	3.23613		10	2.0861	0.299701	-2.62709	-0.0386505	2.01656	2.72629	0.219006	-1.68199	-0.30801	0.0216599	0.234924	-0.42252	0.202599	-0.0439034	-1.22957	1.21814	1.13782	1.15443	2.73058	-0.80772	2.35455	-0.863083
	10	2.11682	-0.0603664	-0.8465	-1.23656	0.152821	0.376083	-1.58421	1.33438	-0.622219	1.37807	-1.5434	-1.33252	-0.451412	-0.00349426	1.15067	-0.681942	-1.8312	-0.71162	1.43767	0.388893	-0.0445213	3.46369		10	2.11682	0.245057	-2.57738	-0.0542297	1.53921	2.5177	0.00159073	-1.63269	-0.263721	0.0278587	0.112141	-0.253624	0.173115	0.0147705	-1.27049	1.3137	1.19274	1.00628	2.47999	-0.761219	2.25156	-0.91613
	10	2.14754	-0.0435432	-0.885227	-1.45316	0.281792	0.627457	-1.4005	1.20989	-0.551949	1.44254	-1.50043	-1.15551	-0.486042	0.201675	0.939651	-0.738174	-1.8521	-0.890354	1.39281	0.486916	-0.197559	3.65742		10	2.14754	0.243958	-2.79959	-0.108494	1.432	2.37173	-0.0679283	-1.73326	-0.526043	0.0192757	0.130199	-0.375275	0.222958	0.119843	-1.3082	1.19355	1.27157	1.13847	2.71244	-0.584885	2.34106	-0.570271
	10	2.17826	-0.123717	-0.94635	-1.32354	-0.00400925	0.606049	-1.61239	0.597385	-0.194794	1.10353	-1.70438	-0.973335	-0.590446	0.25816	0.893562	-0.644428	-1.61407	-0.923851	1.1965	0.418037	-0.27985	3.26389		10	2.17826	0.196601	-2.97974	-0.396519	1.50043	2.42201	0.0388489	-1.79189	-0.532627	-0.447392	0.152431	-0.178143	0.127758	0.0634575	-1.23272	1.27799	1.30433	1.08635	2.67431	-0.791176	2.12237	-0.488064
	10	2.20898	-0.0498583	-0.835899	-1.17583	0.239819	0.867775	-1.44287	0.672226	-0.0581093	1.01716	-1.37155	-0.911179	-0.367641	0.419075	0.889477	-0.736221	-1.61452	-1.16845	0.97422	0.48605	-0.368851	3.48816		10	2.20898	0.16949	-2.82835	-0.311913	1.60247	2.09595	-0.0776825	-1.84254	-0.0914192	-0.289284	0.112751	-0.386719	0.0379562	0.0631065	-1.43311	1.23843	1.09037	0.938969	2.62934	-0.716682	2.00016	-0.442013
	10	2.2397	-0.0788088	-0.845211	-1.27429	0.25211	0.660587	-1.55539	0.630199	0.154644	0.785938	-1.60587	-0.809898	-0.487701	0.464058	1.07714	-0.748459	-1.60613	-1.17771	0.996281	0.224861	-0.439388	3.72805		10	2.2397	0.175304	-2.66961	-0.196056	1.48068	2.16347	-0.185017	-1.97154	-0.243053	-0.214111	-0.100922	-0.194485	0.146152	0.248028	-1.4871	1.29898	1.01668	0.770065	2.74202	-0.547703	1.84155	-0.39196
	10	2.27042	-0.0992725	-0.656418	-1.37115	0.295921	0.627068	-1.50501	0.753597	0.149612	0.659542	-1.88692	-0.887539	0.0828094	0.306938	0.992294	-0.911434	-1.702	-1.33862	0.810555	0.217278	-0.412792	3.7908		10	2.27042	0.134999	-2.95607	-0.213509	1.29601	1.76031	0.0545235	-2.17499	-0.503468	-0.200619	0.0561829	-0.200268	0.368477	0.363552	-1.40665	1.14381	0.993717	0.852398	2.44334	-0.660988	1.86329	-0.179073
	10	2.30114	-0.116146	-0.772957	-1.49216	0.243835	0.30899	-1.46153	0.755669	0.304523	0.751629	-2.0159	-0.701332	-0.0888977	0.517593	1.16774	-1.06448	-1.56007	-1.23828	0.707653	0.279293	-0.533192	3.56895		10	2.30114	0.144396	-2.76557	-0.33411	1.45409	1.62411	-0.164593	-2.18868	-0.494644	-0.244232	-0.0967979	0.144463	0.442364	0.335754	-1.27924	1.21516	1.11301	0.760384	2.41399	-0.770481	1.79572	-0.072773
	10	2.33186	-0.0745827	-0.710255	-1.22693	0.328545	0.439632	-1.62118	0.699451	0.208408	0.630241	-1.75721	-0.821209	0.102638	0.465591	1.12919	-0.982563	-1.4853	-1.11814	0.621429	0.522896	-0.524654	3.60775		10	2.33186	0.10167	-2.574	-0.154572	0.900852	1.66077	-0.21645	-2.12357	-0.67606	-0.292816	0.0748024	0.169083	0.404182	0.227592	-1.25946	1.17108	0.921825	0.419289	2.61386	-0.73373	1.6511	-0.150368
	10	2.36258	-0.037451	-0.598625	-1.14785	0.402042	0.351967	-1.64247	0.86377	0.322979	0.355785	-1.68225	-0.777092	0.270992	0.378418	1.00233	-0.851265	-1.3047	-1.27068	0.672523	0.765556	-0.799259	3.9388		10	2.36258	-0.00943336	-2.68146	-0.338249	1.05714	1.15815	-0.0718422	-2.26833	-0.623138	-0.537216	-0.287701	-0.0917168	0.824738	0.329876	-1.24857	0.859459	0.571957	0.527195	2.58197	-0.998383	1.46281	-0.415356
	10	2.3933	-0.0258118	-0.735954	-1.1938	0.626259	0.346695	-1.69114	1.11831	0.153652	0.296753	-1.67463	-0.720684	0.397369	0.120449	1.16531	-0.949795	-0.980911	-0.956085	0.187065	1.13209	-0.934616	3.77743		10	2.3933	-0.0150942	-2.50073	-0.374153	1.05449	1.10078	-0.151997	-2.00537	-0.574108	-0.798962	-0.267433	-0.0856819	0.774254	0.53183	-1.10947	0.847332	0.402916	0.316029	2.22189	-0.944096	1.57511	-0.314507
	10	2.42402	0.0047184	-0.875824	-1.23646	0.759525	0.45911	-1.64352	1.03932	0.455849	0.366074	-1.53506	-0.404099	0.118763	0.0176888	1.0228	-1.0598	-0.788021	-0.959743	0.146095	1.31564	-0.980549	3.87659		10	2.42402	-0.0284718	-2.69396	-0.341358	1.03742	1.08489	-0.373093	-1.99056	-0.354862	-0.662323	-0.348949	-0.294823	1.19194	0.500511	-1.02212	0.865944	0.28854	0.134903	2.15245	-0.957855	1.60386	-0.38998
	10	2.45474	0.0790375	-0.702026	-0.872974	0.745564	0.741913	-2.07558	1.15124	0.551453	0.215511	-1.6256	-0.165096	0.453671	0.253517	1.4872	-1.24993	-0.78455	-0.893223	0.199478	1.3955	-0.96751	3.72219		10	2.45474	0.0493065	-2.42448	-0.368252	1.11052	1.05336	-0.1763	-1.7929	-0.757656	-0.76889	-0.348248	-0.21632	1.05825	0.571728	-0.961098	1.10278	0.181591	0.416214	2.66823	-0.783615	1.55349	-0.132259
	10	2.48546	0.145158	-0.707676	-0.95393	0.51432	0.999985	-1.71191	1.14887	0.447136	0.480885	-1.42986	-0.0610046	0.726555	0.00193024	1.60276	-1.41837	-0.647282	-0.9007	0.302818	1.67856	-0.979416	3.80947		10	2.48546	0.00925636	-2.41642	-0.453762	1.00411	1.05132	-0.0231552	-1.81705	-0.820526	-0.693413	-0.475121	-0.225422	1.173	0.610363	-1.09031	1.07115	0.182999	0.253971	2.1832	-0.645432	1.5298	-0.21418
	10	2.51618	0.130371	-0.756935	-1.14519	0.777843	0.991562	-1.74228	1.36758	0.287159	0.595123	-1.60834	-0.205685	0.879047	-0.12014	1.63953	-1.5001	-0.411701	-1.11832	-0.0292854	1.89331	-0.973732	3.78798		10	2.51618	-0.00937614	-2.44346	-0.405029	0.789391	0.909939	-0.0297585	-1.67458	-0.916073	-0.898479	-0.484959	0.00372314	1.21035	0.424431	-0.867531	1.14684	-0.122234	0.055294	2.02501	-0.540707	1.71092	-0.080616
	10	2.5469	0.0886089	-0.752262	-1.31104	0.637344	0.830421	-1.46122	1.38417	0.343353	0.783672	-1.52973	-0.194828	0.641449	-0.26149	1.6579	-1.56361	-0.43293	-1.13781	-0.114773	1.80233	-1.05062	3.50185		10	2.5469	0.00529003	-2.38412	-0.442867	0.689201	0.680462	-0.192005	-0.926453	-0.802921	-0.853096	-0.441708	-0.258022	1.32604	0.730801	-0.707924	0.778728	-0.144325	-0.0159187	2.09506	-0.409012	1.34067	0.0432167
	10	2.57762	0.115057	-0.890392	-1.04506	0.65065	0.857414	-1.75901	1.31233	0.419872	0.884048	-1.33161	-0.282207	0.756046	-0.45364	1.87086	-1.48587	-0.566704	-1.0754	-0.149796	1.95742	-0.782768	3.41494		10	2.57762	-0.0396042	-2.22521	-0.68959	0.621071	0.411819	-0.122456	-1.22643	-0.571854	-1.01761	-0.505375	-0.387901	1.49559	0.400604	-0.462791	0.661095	-0.170361	0.0278511	1.9337	-0.561996	1.62339	-0.0256386
	10	2.60834	0.210865	-0.744053	-1.22893	0.647205	1.0017	-1.76064	1.45982	0.58128	1.19279	-1.46453	-0.114552	0.874043	-0.459148	1.96442	-1.54908	-0.373909	-0.799862	0.222305	2.23111	-0.690586	3.22792		10	2.60834	0.0167152	-2.00349	-0.654819	0.645714	0.682629	-0.115337	-1.63947	-0.542328	-0.968742	-0.459717	-0.57444	1.56887	0.654472	-0.544891	0.709229	-0.158009	0.22039	2.00546	-0.222809	1.76742	-0.0358315
	10	2.63906	0.204407	-0.78228	-1.00637	0.717419	0.761829	-1.93969	1.32742	0.662964	1.45939	-1.55367	-0.198475	0.854488	-0.534607	1.86861	-1.43491	-0.343391	-0.784733	0.162521	2.44581	-0.626507	3.03231		10	2.63906	-0.00420361	-2.02172	-0.658634	0.660526	0.584831	-0.108723	-1.429	-0.56641	-1.10585	-0.416767	-0.565071	1.75089	0.598526	-0.540577	0.581081	-0.467083	0.0683594	1.93272	-0.216362	1.6978	0.137394
	10	2.66978	0.201875	-0.984447	-0.897388	0.857395	0.976765	-1.67966	1.23199	0.60281	1.33123	-1.71439	-0.353924	0.931618	-0.670124	1.96642	-1.74371	-0.30447	-1.07391	0.199001	2.63419	-0.322945	3.05105		10	2.66978	0.00526714	-1.92417	-0.591099	0.670101	0.557945	0.111683	-1.07553	-0.206635	-1.14433	-0.555538	-0.757389	1.95761	0.558247	-0.727379	0.212009	-0.829277	0.147945	1.94448	-0.225815	1.47896	0.503517
	10	2.7005	0.23225	-1.00002	-0.669769	0.990078	1.08178	-1.67345	1.09445	0.502533	1.34495	-1.68657	-0.292816	0.899727	-0.827759	1.58846	-1.61039	-0.280067	-0.747982	0.485374	2.81591	-0.43787	3.06842		10	2.7005	-0.0447287	-1.50064	-0.874691	0.170757	0.361217	0.232327	-0.99123	0.0150604	-1.26841	-0.683178	-0.791664	1.8507	0.525486	-0.611385	0.454346	-0.824081	-0.0596085	1.69729	-0.223881	1.22649	0.40052
	10	2.73122	0.271155	-0.605743	-0.85165	1.0552	1.28025	-1.47713	1.05398	0.622887	1.48497	-1.49402	-0.00867081	0.929497	-0.691818	1.45298	-1.81898	-0.135921	-0.949181	0.263813	2.75142	-0.358017	2.91925		10	2.73122	-0.0417904	-1.3541	-0.941074	0.382294	0.455257	0.162636	-0.9641	-0.0457497	-1.39037	-0.774944	-0.750633	1.76861	0.440952	-0.384209	0.299137	-0.841827	0.0975914	1.54663	-0.219494	1.35303	0.324562
	10	2.76194	0.275208	-0.521488	-1.08208	1.09961	1.2374	-1.47042	1.0928	0.573128	1.13168	-1.4125	-0.499931	0.853855	-0.991528	1.60862	-1.61696	-0.128899	-0.914555	0.609653	2.89753	0.0814362	2.95683		10	2.76194	-0.0118767	-1.25835	-0.669659	0.416912	0.303101	0.225483	-1.04556	-0.127979	-1.58684	-0.878681	-0.688118	2.04	0.0764122	-0.279198	0.409729	-0.854275	0.429611	1.50012	-0.119755	1.5124	0.357105
	10	2.79266	0.275598	-0.726025	-0.910358	1.33072	0.9683	-1.14898	1.11376	0.485485	1.12056	-1.10872	-0.697105	0.81546	-0.929729	1.48273	-1.88534	-0.0651588	-1.07475	0.682476	2.84983	0.346676	2.86211		10	2.79266	-0.0350283	-1.30808	-1.06905	0.434402	0.262379	0.107895	-0.91148	-0.130016	-1.54097	-0.946091	-0.887829	2.11069	0.0889931	-0.0460739	0.140659	-0.951656	0.108963	1.52759	0.250652	1.63501	0.423458
	10	2.82338	0.254328	-0.834625	-0.811668	1.48354	1.06467	-0.985077	1.18346	0.353485	1.08835	-1.01163	-0.732483	0.904091	-0.938957	1.20786	-1.72631	0.256561	-1.10538	0.460522	2.73592	-0.189987	2.68421		10	2.82338	0.0227348	-1.14623	-0.919857	0.513184	0.280331	0.15591	-0.696163	0.279476	-1.59019	-1.12331	-1.08114	2.44868	0.186893	-0.137562	0.234325	-0.810204	0.317738	1.33863	0.297897	1.32384	0.582458
	10	2.8541	0.288178	-0.596043	-0.898354	1.68107	0.910961	-0.668602	1.12563	0.457912	1.17694	-1.06032	-0.737038	0.960945	-1.2553	1.20438	-1.99471	0.352909	-1.22943	0.677338	2.68682	0.396641	2.57182		10	2.8541	0.00284576	-0.783882	-1.00224	0.476158	0.532021	0.0423164	-0.60416	0.229946	-1.75648	-1.20356	-1.31105	2.26668	0.0755768	0.00537872	-0.202854	-0.736496	0.380989	1.51383	0.312187	1.26938	0.553169
	10	2.88482	0.353463	-0.587337	-0.603989	1.25361	1.10369	-0.354755	1.26408	0.619846	1.15524	-0.920441	-1.03753	1.12414	-1.50846	1.37177	-1.91067	0.607658	-1.02239	0.772263	2.53773	0.805538	2.39927		10	2.88482	0.0525574	-0.252365	-1.04355	0.485241	0.706566	0.0308456	-0.224968	0.528542	-1.95221	-1.39688	-1.47621	2.39534	-0.137768	0.0991478	-0.22908	-0.836262	0.450428	1.71757	0.681976	1.00589	0.498894
	10	2.91554	0.355802	-0.324387	-0.616577	1.53114	0.870636	-0.093689	1.19895	0.747375	0.731579	-0.971859	-0.809361	0.972412	-1.51683	1.3297	-1.95447	0.766232	-1.25502	0.996567	2.08889	1.30898	2.11577		10	2.91554	0.0704796	-0.359783	-1.04915	0.756744	0.712967	0.412117	-0.253719	0.390221	-1.94535	-1.38758	-1.33181	2.18735	-0.200844	0.343445	-0.39571	-0.797043	0.320225	1.63202	0.710793	0.956108	0.708607
	10	2.94626	0.454002	-0.456886	-0.735325	1.66438	1.04145	-0.0824471	1.40183	0.625023	1.19327	-0.668003	-0.703957	1.07281	-1.64497	1.49855	-1.98749	1.04841	-0.834396	0.835518	2.13177	1.87587	1.80463		10	2.94626	0.039008	0.139091	-1.00846	0.875713	0.624695	0.203022	-0.0552254	0.54076	-2.10985	-1.50324	-1.34482	2.29757	-0.18959	0.349537	-0.420532	-1.05857	0.0220261	1.4792	0.74575	0.727001	0.466087
	10	2.97698	0.435567	-0.0751915	-0.561886	1.52022	1.26424	-0.320606	1.3538	0.370152	1.2637	-0.757576	-0.788513	0.942287	-1.40139	1.49044	-2.23752	1.02345	-0.838188	0.807278	1.89235	1.85558	1.90871		10	2.97698	0.0882738	0.158382	-1.00867	1.06579	1.0409	0.234982	0.109119	0.770538	-2.16883	-1.3255	-1.51186	2.35517	-0.19281	0.398354	-0.689903	-0.981113	0.30212	1.23721	0.948303	0.737385	0.285904
	10	3.0077	0.429003	-0.294476	-0.48447	1.36118	1.59874	-0.285831	1.30098	0.261147	1.1722	-0.508762	-1.08218	0.639748	-1.55845	1.39597	-2.07208	1.0186	-0.908188	0.942329	2.27357	2.08583	1.7242		10	3.0077	0.135303	0.200882	-0.660542	1.26977	1.0416	0.64822	-0.224182	0.947849	-2.51946	-1.36024	-1.29406	2.75957	-0.165638	0.345161	-0.507824	-1.02564	0.323101	1.28828	1.00742	0.668446	-0.0366516
	10	3.03842	0.470887	-0.128334	-0.365524	1.5734	1.73997	-0.361111	1.54612	0.283234	1.43233	-0.581337	-1.07086	0.345715	-1.68045	1.64036	-1.98321	1.07803	-1.26918	1.17455	2.27431	2.09249	1.67722		10	3.03842	0.216687	0.637413	-0.521355	1.40086	1.17482	0.617283	-0.0385323	1.19213	-2.73547	-1.04628	-1.35481	2.43227	-0.121891	0.775612	-0.560242	-1.29049	0.477932	1.51978	1.17575	0.599663	-0.000713348
	10	3.06914	0.450373	-0.0512047	-0.500744	1.50395	1.74116	-0.162327	1.51098	0.150185	1.32381	-0.609089	-0.85466	0.29715	-1.67984	0.940628	-2.02182	1.29649	-0.97567	1.22711	2.22228	2.23033	1.41875		10	3.06914	0.197691	0.600685	-0.604275	1.63374	1.23619	0.50238	-0.0161247	1.37955	-2.65948	-1.23298	-1.29042	2.38817	-0.100613	0.859657	-0.785702	-1.3639	0.405975	1.5432	1.2089	0.284641	-0.0357857
	10	3.09986	0.452565	0.00111771	-0.509232	1.68236	1.92194	-0.36166	1.40698	0.0133667	1.57367	-0.471203	-0.894691	0.142128	-1.54941	1.20219	-2.08749	1.46955	-1.34526	1.14203	2.01003	2.43184	1.27303		10	3.09986	0.261894	0.864185	-0.218094	1.68771	1.4535	0.140774	0.237804	1.45311	-2.6797	-0.839317	-1.27848	2.37686	-0.184776	1.0281	-0.679859	-1.38623	0.525814	1.1859	1.32945	0.368732	-0.147602
	10	3.13058	0.488231	-0.255531	-0.643986	1.86367	2.05283	-0.19186	1.49169	0.0140266	1.47932	-0.34721	-1.00141	0.167416	-1.86159	1.14943	-2.02578	1.50023	-1.00756	1.11656	2.15487	2.75176	1.35774		10	3.13058	0.340987	0.780262	0.0795937	1.59316	1.83855	0.135155	0.0815315	1.59562	-2.65807	-0.713512	-1.27638	2.48127	-0.156891	0.964813	-0.811928	-1.39602	0.657768	1.6264	1.80821	0.390747	-0.200542
	10	3.1613	0.483388	-0.0846825	-0.65036	2.0595	2.21975	-0.190365	1.59462	-0.408157	1.4231	-0.467102	-1.11166	0.0090332	-1.93042	1.08644	-1.71594	1.6274	-1.0973	1.16267	2.21052	2.8145	1.1162		10	3.1613	0.342812	1.27699	-0.100567	1.51503	1.7322	0.182423	0.236244	1.64471	-2.77106	-0.702133	-1.09181	2.23049	-0.0266647	1.31607	-1.09989	-1.29129	0.64798	1.49437	1.67959	0.315193	-0.331638
	10	3.19202	0.517377	-0.21357	-0.339764	2.22688	2.41053	-0.64719	1.23898	-0.289497	1.48578	-0.241154	-0.961987	0.00639725	-1.78725	1.24525	-1.71116	1.51049	-0.968914	1.08366	2.48472	2.73295	1.08237		10	3.19202	0.423543	1.3839	0.29398	1.41325	1.95525	0.468464	0.200359	1.64056	-2.50423	-0.593449	-1.23115	2.03271	0.314869	1.33923	-0.849239	-1.3498	0.707909	1.60816	1.84677	0.343372	-0.550053
	10	3.22274	0.485516	-0.140781	-0.233986	2.45684	2.14527	-0.843338	1.07422	-0.441917	1.01751	-0.411644	-1.09808	-0.0121117	-1.54047	1.44108	-1.44265	1.74732	-0.95623	0.999619	2.48273	2.2728	1.19414		10	3.22274	0.455623	1.34013	0.657284	1.45381	2.21852	0.352139	0.373226	1.61142	-2.50572	-0.582718	-1.20243	2.20044	0.0384102	1.55663	-0.965031	-1.45625	0.808067	1.54647	1.91586	0.324131	-0.571903
	10	3.25346	0.547864	-0.336285	-0.284096	2.57345	2.42381	-0.721386	1.05637	-0.504215	0.969593	-0.258533	-0.930347	0.0570755	-1.4549	1.48619	-1.29871	1.68967	-0.603725	1.0538	2.51223	2.56055	0.966743		10	3.25346	0.473451	1.33677	0.652428	1.44146	2.47264	0.0106773	0.233215	1.84528	-2.38931	-0.486919	-1.31169	2.08278	0.433674	1.57505	-1.14867	-1.56818	0.841805	1.8663	2.2056	0.00500107	-0.628876
	10	3.28418	0.515796	-0.297886	-0.540443	2.7255	2.49076	-0.590519	1.09182	-0.675911	0.771053	-0.28812	-0.80352	-0.345852	-1.37367	1.57925	-1.19886	1.51079	-0.629025	0.997299	2.52058	2.33895	1.03371		10	3.28418	0.507381	1.31222	0.834366	1.12453	2.66781	-0.248112	0.136425	1.9835	-2.31569	-0.488937	-1.35247	2.14635	0.493382	1.8821	-1.18186	-1.26567	0.848919	1.35936	2.10057	0.401443	-0.29063
	10	3.3149	0.465766	-0.220158	-0.711277	2.87489	2.3863	-0.760464	0.998238	-0.711647	0.797859	-0.135078	-1.01706	-0.244587	-1.38628	1.37552	-1.14562	1.02391	-0.592915	0.939861	2.39149	2.37185	1.08048		10	3.3149	0.588742	1.44222	0.730797	1.21371	2.65014	0.380859	0.121429	2.00843	-2.20537	-0.266518	-1.11325	1.84457	0.663151	1.92045	-1.10835	-1.09735	1.13468	1.74357	1.89786	0.51672	-0.702911
	10	3.34562	0.428455	-0.0113297	-0.455757	2.94273	2.04002	-0.69772	1.02969	-0.98439	0.592072	-0.169399	-1.01538	-0.273991	-1.37533	1.33206	-0.820312	1.04214	-0.805645	0.813103	2.20471	2.29332	0.888496		10	3.34562	0.543071	1.33397	0.914928	1.3026	2.40956	-0.0955009	-0.199203	1.91214	-2.00492	-0.564098	-1.04711	1.56948	0.753807	1.89517	-0.905029	-1.00256	1.02597	1.63255	1.98367	0.577728	-0.631744
	10	3.37634	0.483905	0.115044	-0.44532	3.2584	2.10812	-0.621235	0.992874	-1.00087	0.752552	-0.19677	-0.904823	-0.490833	-1.17363	1.48813	-0.740295	1.09004	-0.525131	0.876095	2.11884	2.06426	0.912647		10	3.37634	0.50356	1.46543	0.936005	1.23776	2.4469	-0.145164	-0.10014	2.02296	-1.949	-0.587437	-1.49343	1.57921	0.733078	1.91906	-0.988659	-1.15292	0.783463	1.6389	1.89976	0.547245	-0.721821
	10	3.40706	0.484656	0.159306	-0.501637	3.2609	2.21541	-0.836948	0.832726	-0.898998	0.68763	-0.2705	-0.981491	-0.62479	-0.922291	1.61696	-0.505203	1.03397	-0.289944	0.79166	2.04945	1.85762	1.01928		10	3.40706	0.501156	1.49473	0.984474	1.04679	2.46903	-0.318256	0.230473	2.17036	-2.60496	-0.700748	-1.41342	1.81575	0.959934	2.06091	-0.962227	-1.26854	0.80883	1.55326	1.75722	0.482086	-0.542568
	10	3.43778	0.487453	0.139721	-0.395325	3.71885	2.22398	-0.844814	0.550972	-0.801189	0.755363	-0.0835915	-0.904503	-0.617413	-0.660103	1.63952	-0.819309	0.852539	-0.164307	0.411179	1.88216	1.79266	1.07266		10	3.43778	0.51018	1.75263	1.07572	1.08029	2.24711	-0.54665	0.0553322	2.35465	-1.95603	-0.520634	-1.10753	1.4827	1.10279	2.05287	-1.28816	-1.41399	0.843746	1.4751	1.8826	0.523285	-0.892231
	10	3.4685	0.485494	0.240284	-0.478333	3.73564	2.35432	-0.842052	0.722851	-1.01527	0.659542	0.211151	-1.26547	-0.594036	-0.42807	1.53233	-0.776569	0.900761	-0.0286369	0.648548	1.81277	1.56738	0.752731		10	3.4685	0.514448	1.64249	1.14066	0.891006	2.27608	-0.749958	0.175064	2.27861	-1.65725	-0.695274	-0.822025	1.6221	0.887775	1.92597	-1.27606	-1.30485	1.00717	1.37881	1.72155	0.406887	-0.559814
	10	3.49922	0.492172	0.29562	-0.56942	3.59588	2.37383	-0.916233	0.576199	-0.855381	0.957043	0.45665	-1.234	-0.68993	-0.321983	1.62317	-0.748024	0.675133	0.4333	0.531548	1.54044	1.5751	0.544506		10	3.49922	0.396194	1.75452	0.685894	0.516323	2.10437	-0.530781	-0.14444	2.15652	-1.9355	-0.41951	-1.09091	1.48587	1.0951	1.97712	-1.49978	-1.27554	0.600407	1.42086	1.42002	0.328281	-0.724957
	10	3.52994	0.465467	0.188141	-0.478573	3.42839	1.98556	-1.01898	0.529205	-0.883537	0.577576	0.667141	-1.22638	-0.678993	-0.134197	1.59091	-0.700085	0.701061	0.495335	0.790955	1.52787	1.50689	0.441048		10	3.52994	0.3259	1.56295	0.977074	0.344742	1.8079	-0.763813	-0.294918	2.48859	-2.04087	-0.332378	-1.25559	1.23125	1.17516	1.83373	-1.4166	-1.35693	0.484917	1.14545	1.22318	0.347618	-0.643467
	10	3.56066	0.476526	0.240395	-0.213833	3.98019	2.0691	-1.14507	0.44735	-0.797565	0.303249	0.700974	-1.06878	-0.764339	-0.00564194	2.03133	-0.984711	0.761082	0.317726	0.624588	1.3441	1.26641	0.423962		10	3.56066	0.36002	1.67153	1.0128	0.164021	1.7498	-0.601856	-0.452801	2.50273	-1.67776	-0.224731	-1.27578	1.15702	1.25021	1.82774	-1.26757	-1.33842	0.269825	1.54605	1.21545	0.22855	-0.556396
	10	3.59138	0.482671	0.455837	-0.215523	3.64893	1.80638	-0.960007	0.487698	-0.755424	0.242439	1.1086	-1.2762	-0.706738	0.023983	2.039	-1.02866	0.755634	0.228569	0.776794	1.35723	1.19372	0.471169		10	3.59138	0.35363	1.75289	1.25446	0.0502014	1.6842	-0.626602	-0.190517	2.52702	-2.08052	-0.0615578	-1.23272	1.38671	1.38667	1.82287	-1.37042	-1.34901	0.388428	1.3301	0.89827	0.171036	-0.668892
	10	3.6221	0.487024	0.440762	0.00107956	3.37794	1.67712	-1.02766	0.488235	-0.814789	0.345245	1.29041	-1.26177	-0.782459	0.195152	2.04319	-0.906689	0.780979	0.475178	0.80233	1.20062	1.07096	0.344627		10	3.6221	0.279446	1.82626	0.888596	0.000957489	1.39624	-0.609737	-0.417667	2.45428	-2.1482	0.113178	-1.03499	0.779358	1.36715	1.68685	-1.12902	-1.53974	0.377708	1.18453	0.728672	0.12727	-0.462769
	10	3.65282	0.517619	0.585396	-0.103691	3.47776	1.82488	-0.996387	0.0975952	-0.73735	0.519196	1.5476	-1.38952	-0.94363	0.292263	2.02309	-1.03046	0.602142	0.800072	1.13025	1.21811	1.02409	0.410992		10	3.65282	0.271172	1.9004	0.744411	0.401524	1.26165	-0.464046	-0.41943	2.3195	-2.12941	0.251804	-0.915855	1.10403	1.29107	1.27766	-1.26756	-1.42531	0.312111	1.2293	0.577419	0.0172768	-0.64312
	10	3.68354	0.516839	0.668449	0.159092	3.57694	1.63441	-0.898994	-0.243233	-0.636524	0.254421	1.64909	-1.39306	-0.819019	0.350307	2.00561	-0.547943	0.350357	0.966877	1.18803	1.07102	0.755589	0.245361		10	3.68354	0.25506	1.82276	0.838348	0.270321	0.955605	-0.512341	-0.387531	2.67309	-1.94567	0.397671	-0.904793	0.99139	1.21777	1.33534	-1.117	-1.44236	-0.0225258	1.18038	0.46244	-0.0348625	-0.67683
	10	3.71426	0.640466	0.562962	0.231796	3.59159	1.68696	-0.941589	0.250153	-0.472565	0.336487	2.23119	-0.789131	-0.681831	0.477848	1.90278	-0.340134	0.386478	1.14796	1.30508	1.03804	0.684517	0.200722		10	3.71426	0.227709	1.80759	0.877354	0.18927	1.05505	-0.666885	-0.399109	2.84454	-2.12257	0.546108	-1.21577	1.08787	1.39964	1.22081	-1.18428	-1.712	-0.191612	1.22934	0.39267	0.129883	-0.733719
	10	3.74498	0.570518	0.694851	0.248154	3.27028	1.6014	-0.719822	-0.112175	-0.177998	-0.0724716	2.29018	-1.28946	-0.828434	0.725086	1.89343	-0.212723	0.487175	1.13783	1.21663	1.05627	0.489658	-0.287506		10	3.74498	0.233021	2.02847	0.62141	0.086525	0.854195	-0.727898	-0.49102	2.71539	-2.09195	0.593815	-0.976971	1.06747	1.57468	1.254	-1.26668	-1.51627	-0.280003	1.18089	0.196243	0.457718	-0.619598
	10	3.7757	0.588057	0.586704	0.215096	3.15281	1.61893	-0.786976	0.00845337	-0.113647	-0.348846	2.70723	-1.51667	-0.638741	1.0062	2.0193	-0.0531616	0.472427	1.03379	1.35171	0.830231	0.410789	-0.194481		10	3.7757	0.168269	1.77125	0.697193	-0.0369186	0.698223	-0.759632	-0.618191	2.85554	-2.12841	0.857624	-0.978569	0.961494	1.59556	1.02576	-1.34891	-1.41699	-0.394886	1.14089	0.10157	0.215618	-0.872833
	10	3.80642	0.513131	0.384399	0.33326	2.81103	1.47276	-0.938786	-0.408806	-0.013176	-0.388355	2.7514	-1.27822	-0.626209	1.08635	1.86177	0.193031	0.466469	1.01398	1.34665	0.284607	0.243992	-0.333542		10	3.80642	0.203535	2.03295	0.568577	0.0929489	0.393627	-0.803143	-0.392155	2.905	-2.04619	1.04818	-0.677105	0.885597	1.62222	1.02457	-1.11082	-1.36897	-0.772209	1.02819	0.0598602	0.299755	-0.720188
	10	3.83714	0.614126	0.481491	0.568935	2.84238	1.78687	-0.654926	-0.478195	0.134117	-0.0865288	2.84624	-1.45374	-0.48341	1.36868	1.81293	0.173416	0.365116	1.0858	1.45467	0.345345	0.202282	-0.0289383		10	3.83714	0.170865	1.91343	0.447857	-0.102127	0.293461	-0.866665	-0.290913	3.08409	-2.01123	1.17092	-0.85997	0.603962	1.45211	0.943867	-0.994747	-1.34754	-0.543861	1.07215	-0.134155	0.24659	-0.659927
	10	3.86786	0.628676	0.150318	0.617676	2.63886	1.70081	-0.579956	-0.356575	0.306374	-0.153011	2.60551	-1.3673	-0.418903	1.64474	1.89242	0.579208	0.398758	1.22231	1.68937	0.242325	0.158627	-0.398033		10	3.86786	0.0890045	1.932	0.358448	-0.416908	0.208328	-0.646477	-0.409348	2.73826	-2.18059	1.66844	-0.803226	0.320686	1.07888	0.528446	-1.02868	-1.47899	-0.425644	0.859409	-0.319313	0.33186	-0.535496
	10	3.89858	0.673166	0.10014	0.553532	2.40866	1.65012	-0.730114	-0.31451	0.378696	0.0981026	2.72718	-1.19368	-0.135891	1.86543	1.90346	0.4813	0.0980873	1.22175	1.79858	0.27729	0.232834	0.0423622		10	3.89858	0.125427	1.91686	0.546474	-0.242348	0.353756	-0.611668	-0.529976	2.77816	-2.20942	1.52939	-0.7673	0.77145	1.18407	0.47205	-1.10518	-1.69506	-0.523857	0.811367	-0.200111	0.418846	-0.388962
	10	3.9293	0.694643	0.0818787	0.523598	2.78638	1.62049	-0.538174	-0.597904	0.488201	0.140423	2.88571	-1.17986	-0.286842	1.90664	1.72339	1.10208	-0.194118	1.35872	1.67605	0.322121	-0.00283051	0.0769081		10	3.9293	0.115797	1.87194	0.665844	-0.086628	0.162472	-0.514561	-0.484917	2.73754	-2.49161	1.34063	-0.859982	0.896095	1.21813	0.393478	-0.814335	-1.29366	-0.694065	0.615555	-0.408169	0.367191	-0.305016
	10	3.96002	0.747502	-0.113647	0.69297	2.29016	2.12138	-0.637497	-0.545753	0.787788	0.203831	2.96148	-1.07053	0.0853539	2.10622	1.90426	1.28671	-0.417969	1.03863	1.4659	0.373169	-0.0470924	0.464672		10	3.96002	0.153254	1.43509	0.781475	-0.250839	0.287521	-0.163284	-0.595814	2.84105	-2.09638	1.50054	-0.922459	0.585808	1.24932	0.45084	-0.733036	-1.43447	-0.615185	0.662762	-0.430702	0.525047	-0.0122147
	10	3.99074	0.69767	-0.217346	0.652866	1.79901	2.20538	-0.54665	-0.931465	0.980598	0.39529	2.6499	-1.19585	-0.232403	2.1846	1.64954	1.40773	-0.34586	1.28862	1.78706	0.0328484	-0.0863457	0.475853		10	3.99074	0.146087	1.58311	0.712437	-0.104591	-0.00425339	0.000915527	-0.285645	2.46749	-1.56952	1.48948	-1.14793	0.535622	1.13114	0.413433	-0.881298	-1.11467	-0.880722	0.475758	-0.449799	0.512413	0.0383759
	10	4.02146	0.675732	-0.500851	0.880669	1.72228	2.60356	-0.575748	-0.721729	0.646503	0.16679	2.74088	-1.14899	-0.036026	2.3619	1.30664	1.59339	-0.637482	1.34301	1.867	-0.308617	-0.473446	0.68491		10	4.02146	0.140092	1.52998	0.387917	-0.0464096	0.0119095	0.118622	-0.214748	2.41437	-1.61228	1.74782	-1.38506	0.718822	1.04899	0.158684	-0.629528	-1.37183	-0.9417	0.615986	-0.352592	0.543358	0.0595245
	10	4.05218	0.647476	-0.695709	0.899345	1.50314	2.63148	-0.679817	-0.78537	0.699932	0.172787	2.59736	-1.14414	-0.213673	2.4503	1.33772	1.73926	-0.660873	1.24061	1.87249	-0.309925	-0.561539	0.85614		10	4.05218	0.117901	1.25146	0.462383	0.0432854	-0.134811	0.0170898	-0.399036	2.50476	-1.64895	1.8662	-1.17614	0.382092	0.632679	0.0359421	-0.554474	-1.17816	-0.838177	0.574879	-0.562603	0.612167	0.467438
	10	4.0829	0.724425	-0.342373	0.823265	1.7692	2.97718	-0.854435	-0.597305	0.820477	0.489777	2.88908	-1.17442	-0.27837	2.29069	1.61395	1.90205	-0.874767	1.13734	1.63349	0.0436401	-0.820049	1.04007		10	4.0829	0.177116	1.30451	0.380798	0.142147	-0.281361	0.500462	-0.338097	2.34809	-1.44236	2.09725	-0.959736	0.280262	0.456348	0.0158348	-0.237698	-1.42266	-1.09587	0.764019	-0.417374	0.582165	0.865593
	10	4.11362	0.759449	-0.30637	0.755219	1.65896	2.75974	-0.698723	-0.51696	0.845879	0.403374	2.47134	-0.909496	-0.242607	2.42724	1.64679	2.12701	-0.741482	1.08577	2.12949	0.0083847	-0.749428	1.03485		10	4.11362	0.220101	1.41981	0.499306	0.332787	-0.267277	0.706928	-0.36953	2.38862	-1.59155	1.99491	-1.08669	0.308456	0.538292	-0.143276	-0.313408	-1.15699	-0.888985	0.853794	-0.604424	0.817493	0.963753
	10	4.14434	0.703387	-0.550167	0.806908	1.52388	3.05669	-0.955372	-0.428246	0.822216	0.357189	2.06928	-1.20464	-0.458813	2.77997	1.6101	2.05344	-0.891804	0.94894	1.89386	-0.130169	-0.922718	1.6872		10	4.14434	0.180929	1.17246	0.224968	0.283897	-0.29657	1.00629	-0.568062	2.41768	-1.44639	2.06076	-1.42501	0.164532	0.5285	-0.323662	-0.669926	-1.02118	-0.948471	0.549633	-0.280102	0.817936	1.3713
	10	4.17506	0.7315	-0.760979	0.891251	1.47187	3.12498	-0.702633	-0.366081	0.703915	0.428551	2.17143	-1.15149	-0.491047	2.59926	1.4821	2.13946	-1.10135	1.10936	2.03982	0.285168	-0.894753	1.65117		10	4.17506	0.174897	0.840965	0.354633	0.486221	-0.514175	1.207	-0.549385	2.37197	-1.03383	1.65795	-1.34739	0.293697	0.23539	-0.327225	-0.77549	-0.940048	-0.968029	0.47678	-0.197716	0.641983	1.58464
	10	4.20578	0.678499	-0.889473	1.27118	1.34661	3.05911	-1.01145	-0.506638	0.704891	0.455181	2.06197	-1.0761	-0.497749	2.23537	1.99427	2.18605	-1.2696	0.991688	1.39682	0.153835	-1.03574	1.99974		10	4.20578	0.222907	1.07285	0.595375	0.495636	-0.625309	1.45813	-0.996094	2.50752	-1.02047	2.13976	-0.907211	0.16135	0.109623	-0.086113	-0.663631	-1.16039	-0.875751	0.379475	-0.520332	0.536015	1.8577
	10	4.2365	0.707946	-1.01607	1.49522	1.20192	2.99062	-0.927212	-0.287483	0.733513	0.638191	1.80006	-1.06153	-0.60358	2.29354	1.92074	2.16306	-1.28024	0.880047	1.94728	0.366943	-1.17334	2.07725		10	4.2365	0.189136	0.722279	0.642094	0.593769	-0.857601	1.73802	-0.914459	2.56475	-1.08548	1.76072	-1.67237	0.478767	0.0322571	-0.0592422	-0.802773	-1.07143	-0.826385	0.827591	-0.86058	0.613804	1.95898
	10	4.26722	0.662406	-1.07106	1.53063	1.13261	2.9939	-1.12572	-0.129089	0.607746	0.565331	1.43221	-1.27127	-0.650028	2.60297	1.85482	1.98887	-1.39642	1.13972	1.65029	0.412579	-1.18769	2.16772		10	4.26722	0.171248	0.509109	0.712429	0.503326	-0.869427	2.18473	-0.822002	2.17652	-1.15781	1.67886	-1.8488	0.447025	-0.12579	-0.0447693	-0.881607	-0.970051	-0.750999	0.723522	-0.719818	0.792423	1.88808
	10	4.29794	0.652879	-1.0736	1.43563	1.15578	2.89104	-0.969494	-0.303028	0.990112	0.624378	1.35434	-0.998276	-0.853222	2.08792	1.84526	2.06457	-1.23837	0.816841	1.59065	0.559265	-1.23227	2.31007		10	4.29794	0.24892	0.651588	0.949417	0.814022	-0.812721	2.60128	-0.850208	2.28109	-1.02972	1.34095	-1.71513	0.666107	-0.00227737	-0.117908	-1.27381	-0.736057	-0.356907	0.622242	-0.605591	0.737122	1.81491
	10	4.32866	0.665928	-1.05348	1.45887	1.12857	3.17706	-0.836472	-0.0370865	1.23318	0.498398	1.30995	-0.859383	-0.692059	2.08123	1.80844	1.86401	-1.43953	0.663181	1.45314	0.489754	-1.37948	2.45027		10	4.32866	0.225437	0.707531	0.880787	0.864758	-0.708637	2.81271	-1.17305	2.01926	-0.93483	1.35699	-1.68419	0.801174	-0.152241	-0.276863	-1.08641	-1.17129	-0.300961	0.754433	-0.685783	0.695541	1.78979
	10	4.35938	0.745693	-0.94537	1.65599	1.25193	3.15643	-0.750568	-0.31583	1.4394	0.403801	1.2388	-0.828926	-0.506378	2.10507	1.88207	2.01611	-1.41004	0.676151	1.45797	0.987617	-1.36413	2.76378		10	4.35938	0.21466	0.519798	1.07145	1.04175	-0.710106	3.08151	-1.16547	2.06343	-1.01013	1.08266	-1.77599	1.116	-0.170265	-0.579685	-1.02715	-0.81398	-0.432495	0.418121	-0.622864	0.589516	1.61709
	10	4.3901	0.749595	-0.812962	1.93708	1.01743	3.22338	-0.98658	-0.330986	1.5137	0.449783	1.18042	-0.962009	-0.560131	1.93808	1.84138	2.45899	-1.4546	0.52142	1.4441	1.18939	-1.39209	2.77608		10	4.3901	0.236222	0.555061	1.47962	0.922752	-1.14976	3.05991	-1.02375	1.93825	-1.1926	1.05915	-1.35003	1.12827	-0.321533	-0.72171	-1.02306	-0.672375	-0.229069	0.27364	-0.498634	0.83894	1.65137
	10	4.42082	0.776196	-1.179	1.42277	1.1563	3.1273	-0.838745	-0.203598	1.60162	0.60989	1.24607	-0.509502	-0.836437	1.94363	1.86985	2.11237	-1.37764	0.381409	1.62232	1.38036	-0.974148	2.96909		10	4.42082	0.236514	0.397221	1.38847	1.05841	-0.932419	3.29019	-1.38979	1.76308	-0.867092	1.06112	-1.7379	1.12162	-0.298908	-0.734791	-0.820549	-0.84016	-0.180595	0.411289	-0.401814	0.702671	1.74021
	10	4.45154	0.699013	-1.33321	1.49915	0.639004	3.12894	-1.09814	-0.21138	1.66391	0.497883	1.33551	-0.644661	-0.959747	2.03124	2.01597	2.12155	-1.39949	0.449932	1.42173	1.66307	-1.28116	2.44016		10	4.45154	0.294568	0.28701	1.77927	1.02358	-0.782894	3.4191	-1.65691	1.67123	-0.865353	1.01802	-1.69249	1.21073	-0.451447	-0.656719	-0.604885	-0.771294	-0.175957	0.489693	-0.083046	0.73357	2.00014
	10	4.48226	0.792591	-1.13242	1.71524	0.835281	3.10968	-0.995556	0.0546494	1.59713	0.530895	1.51696	-0.383781	-0.862217	2.204	1.79122	1.86782	-1.49601	0.130531	1.67263	2.19507	-1.34428	2.845		10	4.48226	0.291388	0.16222	1.82311	1.08081	-0.711727	3.24454	-1.46056	1.49242	-0.663826	0.677036	-1.85644	1.37419	-0.267628	-0.627266	-0.980515	-0.900242	-0.149303	0.614491	0.0562592	0.612682	2.30751
	10	4.51298	0.697434	-1.30836	1.72151	0.661758	3.20126	-1.33732	0.00747681	1.53746	0.370876	1.47803	-0.460293	-1.21796	2.26855	1.57782	1.85574	-1.44923	0.243446	1.34069	2.49071	-1.60325	2.56979		10	4.51298	0.299535	0.396385	1.96516	1.12921	-0.751743	3.22241	-1.44544	1.33968	-0.866283	0.4478	-1.55138	1.37817	-0.487854	-0.716251	-0.907715	-0.680431	0.0151443	0.484863	0.102737	0.608105	2.30813
	10	4.5437	0.728862	-1.16057	1.60532	0.870495	3.40026	-1.27945	-0.108612	1.64066	0.446335	1.15209	-0.389091	-1.17039	2.41308	1.74236	1.52518	-1.39519	0.0830765	1.17477	2.7516	-1.22491	2.50023		10	4.5437	0.327266	0.218128	2.12525	1.04735	-0.326763	3.02016	-1.3793	1.39783	-0.623058	0.284721	-1.60999	1.49179	-0.494793	-0.805172	-0.999493	-0.483246	0.175316	0.624687	0.194908	0.549381	2.1376
	10	4.57442	0.629382	-1.3824	1.56241	0.826363	3.28658	-1.24735	-0.305378	1.73127	0.203045	1.0216	-0.447968	-1.02239	1.35667	1.55123	1.52124	-1.72125	0.132713	1.25971	2.9124	-1.31139	2.66054		10	4.57442	0.33088	-0.0287056	2.14645	1.26639	-0.475582	2.995	-1.60602	1.16878	-0.251568	0.0671272	-1.56422	1.65591	-0.544384	-0.809036	-0.797207	-0.4034	0.141483	0.72073	0.171631	0.634102	2.13012
	10	4.60514	0.733281	-1.0459	1.60661	0.923973	3.35093	-1.16187	-0.361702	1.81572	0.387234	0.929386	-0.320759	-0.990513	2.32267	1.60471	1.46039	-1.45063	0.0725861	0.950481	3.21723	-1.37786	2.73293		10	4.60514	0.308842	0.114586	1.89425	1.27316	-0.32333	3.12561	-1.61283	1.01743	-0.0689468	0.0416145	-1.52698	1.72279	-0.839958	-0.877518	-1.01439	-0.435291	0.201889	0.554363	0.483589	0.320095	2.12671
	10	4.63586	0.666537	-1.06905	1.35294	0.919418	3.24164	-1.12095	-0.496742	1.79067	0.249153	0.898464	-0.432529	-1.23189	2.20514	1.49918	1.42535	-1.50142	0.0543098	0.67691	3.525	-1.37426	2.7194		10	4.63586	0.285301	-0.0234604	1.75988	1.01269	-0.356731	2.98566	-1.34209	1.11418	0.0839005	-0.203434	-1.41729	1.56932	-0.841167	-1.21023	-0.750908	-0.25531	0.317474	0.472897	0.322075	0.192684	2.27588
	10	4.66658	0.619626	-1.63934	1.37892	1.53394	3.14365	-1.19801	-0.553486	1.5406	0.151768	0.744564	-0.525299	-1.32585	2.10904	1.66103	1.47031	-1.61951	-0.182404	0.94104	3.72075	-1.52928	2.57008		10	4.66658	0.281532	-0.148106	1.77547	0.830772	-0.342487	2.68669	-1.45984	0.953796	0.38369	-0.198338	-1.39757	1.67761	-0.811935	-1.25757	-0.753815	-0.264679	0.268345	0.429707	0.686615	0.572186	2.00011
	10	4.6973	0.584363	-1.28575	1.11709	1.31238	3.21563	-1.38169	-0.617836	1.72787	0.121037	0.718185	-0.500885	-1.25135	2.03954	1.49978	1.48603	-1.55885	-0.282055	0.765053	3.71021	-1.42955	2.28243		10	4.6973	0.264416	-0.0453339	1.44288	0.990536	-0.463272	2.73941	-1.40451	0.926403	0.452663	-0.369442	-1.56815	1.69039	-1.04706	-1.39341	-0.6689	-0.00364304	0.701664	0.352962	0.413754	0.602932	1.93843
	10	4.72802	0.578349	-0.98534	0.914402	1.46613	3.10217	-1.28349	-0.57132	1.89017	-0.049839	0.842094	-0.676155	-1.40121	1.93599	1.73529	1.31069	-1.68314	-0.472572	0.899986	3.50763	-1.3132	2.3987		10	4.72802	0.259908	-0.096035	1.32851	0.852516	-0.367985	2.86173	-1.43916	0.49527	0.632629	-0.235046	-1.42772	1.53203	-0.966511	-1.06565	-0.94355	0.116829	0.763897	0.115433	0.559738	0.534729	1.9465
	10	4.75875	0.54109	-1.04489	1.16388	1.16068	3.17378	-1.31523	-0.604927	2.02491	-0.142223	0.862431	-0.931229	-1.22397	1.84114	1.59044	1.16473	-1.79501	-0.340347	0.755981	3.61857	-1.33423	2.19732		10	4.75875	0.26843	0.00908279	1.36367	0.627365	-0.319553	2.79339	-1.41739	0.681068	0.491501	-0.29179	-1.39673	1.68053	-1.06627	-1.30188	-0.965111	0.419964	0.879078	0.14011	0.685707	0.446693	1.90916
	10	4.78946	0.492203	-1.01945	1.17717	1.40787	2.73291	-1.38705	-0.832664	1.89007	-0.255093	0.795349	-0.893833	-1.17353	1.82975	2.014	0.902184	-1.65387	-0.496662	0.689651	3.22167	-1.22607	2.12166		10	4.78946	0.266777	0.199142	1.09255	0.640144	-0.156723	2.70418	-1.45147	0.478649	0.280334	-0.376667	-1.55241	1.96225	-1.05523	-1.37995	-0.87878	0.591259	0.87685	0.332584	0.832943	0.449062	1.74684
	10	4.82019	0.527871	-1.02358	1.09647	1.4628	2.67516	-1.24453	-0.745914	1.94798	-0.00914001	0.769028	-0.825684	-1.24852	1.72965	1.90391	0.810772	-1.65868	-0.263123	0.767296	3.14578	-0.905712	2.17344		10	4.82019	0.200383	-0.232983	1.15084	0.842201	-0.166584	2.37906	-1.74977	0.378681	0.392582	-0.41832	-1.54422	2.15078	-1.02968	-1.80599	-1.00285	0.326099	0.907558	0.428192	0.765411	0.585796	1.65086
	10	4.85091	0.434059	-0.893024	1.10818	1.59592	2.4886	-1.41322	-0.676643	1.85764	-0.371677	0.532005	-0.894619	-1.28288	1.35264	2.22916	0.985855	-1.89196	-0.343018	0.586884	2.79137	-1.06839	1.98833		10	4.85091	0.254599	-0.0923004	0.898468	0.803555	-0.07024	2.45885	-1.6365	0.583141	0.377762	-0.30508	-1.40212	2.14784	-1.01484	-1.47681	-0.812634	0.676517	1.06862	0.447956	0.540203	0.461628	1.43794
	10	4.88163	0.376528	-1.128	1.22442	1.44877	2.1622	-1.70534	-0.85046	1.7948	-0.352089	0.252541	-0.752689	-1.3502	1.14792	2.34434	0.970276	-1.79509	-0.144688	0.68412	2.83097	-0.875751	1.62452		10	4.88163	0.209224	-0.137745	0.945362	0.685814	0.120735	2.43867	-1.6552	0.684715	0.544239	-0.499264	-1.58607	2.19126	-1.49182	-1.66216	-1.0335	0.649433	1.443	0.424557	0.388424	0.428036	1.30599
	10	4.91235	0.303782	-1.06144	1.11819	1.54419	1.91161	-1.60843	-0.767433	1.53403	-0.32011	0.208755	-0.981926	-1.619	1.0746	2.49556	0.865929	-1.65196	-0.451328	0.628391	2.63919	-0.80835	1.3252		10	4.91235	0.212857	-0.242863	0.73074	0.840237	0.356712	2.1309	-1.53653	0.697128	0.534203	-0.209202	-1.46757	2.46519	-1.47355	-1.79395	-1.1839	0.731552	1.15705	0.429684	0.408295	0.0738564	1.60915
	10	4.94307	0.293523	-1.09832	1.1231	1.43185	1.80817	-1.18026	-0.756466	1.59624	-0.607761	0.082428	-0.859093	-1.56865	0.964069	2.31602	0.781067	-1.67776	-0.287739	0.550308	2.49237	-0.839394	1.60027		10	4.94307	0.127676	-0.291477	0.579369	0.956848	0.5144	1.91737	-1.60377	0.647953	0.171661	-0.444092	-1.79567	2.43266	-1.52822	-1.77046	-1.44429	0.830471	1.2404	0.550617	0.431866	-0.0964622	1.25434
	10	4.97379	0.213628	-1.08237	0.742313	1.16526	1.70567	-1.41274	-0.845905	1.70639	-0.727505	0.0130882	-1.10836	-1.72718	0.90905	2.54139	0.700062	-1.78259	-0.460899	0.591923	2.33981	-0.703732	1.70887		10	4.97379	0.0113949	-0.469215	0.391041	0.900963	0.566757	1.83412	-1.37218	0.500862	0.0782852	-0.575603	-1.56877	2.11058	-2.4876	-1.98799	-1.31038	1.22406	0.878197	0.34124	0.225616	-0.214367	1.16228
	10	5.00451	0.264536	-1.13032	0.654465	1.46629	1.95097	-1.20097	-1.01619	1.76851	-0.727314	0.0129204	-0.947395	-1.62312	0.654625	2.38882	0.825268	-1.87776	-0.322071	0.726295	2.49353	-0.332134	1.5263		10	5.00451	0.0291254	-0.61599	0.426876	0.916531	0.496838	1.89969	-1.43214	0.601952	-0.182102	-0.708309	-1.52475	2.36015	-2.06781	-1.78917	-1.30597	1.21094	1.03956	0.224762	0.289299	-0.325294	1.06745
	10	5.03523	0.264983	-0.961559	0.521515	1.50465	1.50037	-1.3167	-0.919113	1.60785	-0.556152	-0.0162048	-1.04388	-1.57191	0.503788	2.68424	0.944668	-1.63235	-0.359707	0.917282	2.08651	-0.341755	1.74813		10	5.03523	-0.0447611	-0.694405	0.295826	0.777233	0.531982	1.51426	-1.23806	0.29681	0.0730515	-0.630592	-1.16511	2.16908	-1.97471	-2.15801	-1.42311	1.21325	0.723797	-0.0735207	0.189442	-0.198444	0.876015
	10	5.06595	0.360578	-1.02463	0.579338	1.46932	1.41379	-1.22811	-0.770126	2.14199	-0.482544	-0.100327	-0.932457	-1.34111	0.517342	2.55464	0.957092	-1.58965	0.092041	0.996971	2.49562	-0.202816	1.66518		10	5.06595	-0.136763	-0.630913	0.0147438	0.661766	0.508419	1.40391	-1.10264	0.34597	0.0500069	-0.888958	-1.37436	2.14312	-1.95206	-2.1825	-1.76474	1.19348	0.479965	-0.192757	0.345749	-0.266956	0.473492
	10	5.09667	0.322404	-0.997547	0.427147	1.23741	1.3481	-1.36452	-0.692581	1.76588	-0.0184708	-0.313618	-0.962593	-1.37138	0.0263672	2.42281	1.1118	-1.56847	0.247452	0.957481	2.45441	-0.00218582	1.74059		10	5.09667	-0.198147	-0.38224	0.0999794	0.803101	0.167957	1.22251	-1.17596	0.33379	-0.270119	-1.20151	-1.16134	2.04326	-2.17179	-1.83891	-1.96248	1.34071	0.41003	-0.772636	0.058342	-0.0658722	0.560226
	10	5.12739	0.337431	-0.850697	0.112839	1.37611	1.07561	-1.09874	-0.700081	1.93291	-0.296562	-0.489967	-0.922195	-1.40144	0.232624	2.31856	1.22514	-1.91215	0.173748	1.24352	2.62035	0.273808	1.83522		10	5.12739	-0.303508	-0.953747	0.110733	0.844585	0.0678902	1.22692	-1.14479	0.0684891	-0.261307	-1.09136	-1.21201	1.87497	-2.14684	-2.03639	-1.96812	1.20167	0.32687	-0.941502	0.0144882	-0.26775	0.217033
	10	5.15811	0.372472	-0.685268	0.181038	1.26284	0.914314	-0.777225	-0.495049	1.88109	-0.17659	-0.715019	-0.921036	-1.54909	-0.0490417	2.08903	1.27991	-1.47013	0.232086	1.57306	2.93764	0.003582	1.93331		10	5.15811	-0.3875	-1.72635	0.101337	0.92485	-0.0360832	1.19241	-1.04506	0.107136	-0.0257607	-1.35951	-1.05642	1.76093	-2.02356	-2.25648	-1.85235	1.13956	0.0830231	-1.37732	-0.0652542	-0.297615	0.0625153
	10	5.18883	0.510265	-0.490288	0.0698624	1.18571	0.880085	-0.432804	-0.421425	2.09042	0.314289	-0.76136	-0.818398	-1.32374	-0.256611	2.05392	1.58612	-1.27079	0.223934	1.92577	3.13167	0.372547	2.14638		10	5.18883	-0.473344	-1.14413	0.0288925	1.02982	-0.0994072	0.998791	-1.34777	0.291279	-0.262177	-1.51102	-0.888607	1.51994	-2.32702	-2.44674	-2.2787	1.08327	0.0391045	-1.61008	-0.168297	-0.307972	-0.0660248
	10	5.21955	0.529215	-0.461773	0.200127	1.26026	1.04776	-0.427166	-0.529572	1.90641	0.385944	-0.695675	-0.854603	-1.18724	-0.551582	1.82546	1.87877	-1.09361	0.437565	2.02077	2.93874	0.358971	2.12474		10	5.21955	-0.527599	-1.10863	0.0724678	1.10972	-0.110722	0.977955	-1.19518	0.122707	-0.284958	-1.89272	-0.857643	1.54741	-2.25925	-2.73121	-2.43537	1.30806	-0.0153961	-1.96351	-0.541218	-0.163036	-0.131447
	10	5.25027	0.631413	-0.0319176	0.3074	1.51694	1.28342	-0.29427	-0.365959	2.16903	0.264389	-0.852013	-0.746368	-1.03608	-0.467731	1.73369	2.04328	-1.22371	0.424492	2.15921	3.03761	0.468094	2.23875		10	5.25027	-0.579733	-1.41487	-0.193584	1.18952	-0.0454521	1.11742	-1.4554	-0.137066	-0.456284	-2.11619	-0.421482	1.55201	-1.97445	-2.68911	-2.59795	1.47644	-0.3578	-2.15736	-0.477264	0.00154495	-0.437317
	10	5.28099	0.744137	0.466629	0.164196	1.29619	1.49084	0.108467	0.117279	2.20649	0.614101	-0.54026	-0.87278	-0.992817	-0.455879	2.06486	2.0239	-0.987968	0.444218	2.11156	2.86311	0.335392	2.42521		10	5.28099	-0.695116	-1.45252	-0.321236	1.30354	0.0739708	0.752888	-1.4215	0.129978	-0.615093	-2.51117	-0.341633	1.58754	-2.39979	-2.74814	-3.07657	1.13758	-0.353745	-2.52193	-0.529953	-0.181053	-0.413498
	10	5.31171	0.827165	0.661331	0.0120621	1.51836	1.23778	0.434505	0.17474	2.21473	0.896557	-0.255657	-0.632038	-1.00391	-0.262524	1.94623	2.35799	-0.714573	0.465626	2.16739	2.46848	0.465137	2.39109		10	5.31171	-0.777406	-1.5254	0.108608	1.05694	0.0981102	0.893921	-1.69141	0.117985	-0.911057	-2.96199	-0.366276	1.4352	-2.10333	-2.83013	-3.31431	0.982918	-0.770145	-2.91329	-0.542946	0.0990639	-0.410564
	10	5.34243	0.941275	0.665241	0.0749054	1.7198	1.39217	0.619137	0.350929	2.39485	1.12058	-0.106255	-0.58717	-0.740124	-0.564434	1.69567	2.60457	-0.49963	0.771557	2.48067	2.56068	0.315182	2.55714		10	5.34243	-0.915366	-1.69202	0.123569	1.19975	-0.147274	0.797935	-1.77662	0.0846901	-1.14242	-3.404	-0.28849	1.64267	-2.00103	-3.08935	-3.58199	0.917511	-0.931686	-3.54487	-0.83289	-0.111088	-0.529724
	10	5.37315	1.04558	1.01726	0.000999451	1.88279	1.5415	0.869476	0.498894	2.52492	1.03376	-0.253677	-0.412346	-0.730984	-0.329712	1.56899	3.54041	-0.588535	0.755424	2.39915	2.58974	0.490444	2.51313		10	5.37315	-1.03339	-1.71511	-0.198917	1.17448	-0.316143	0.722569	-1.8512	0.110142	-1.17682	-3.43533	-0.167137	1.36191	-2.05352	-3.54927	-3.37297	0.762619	-1.05233	-3.57773	-1.3745	-0.182625	-0.775932
	10	5.40387	1.08087	1.37424	-0.216095	1.75113	1.51881	0.980434	0.672989	2.20618	1.02708	0.100143	-0.225773	-0.605385	-0.628021	1.35427	3.19934	-0.512943	1.15062	2.70377	2.7747	0.618893	2.37296		10	5.40387	-1.14873	-1.99406	-0.349155	1.32407	-0.420547	0.303349	-2.01064	0.0141869	-1.33618	-3.53926	-0.258942	1.44284	-2.1286	-3.74106	-3.64794	0.546604	-1.14362	-3.8489	-1.27272	-0.178104	-0.735817
	10	5.43459	1.18793	1.62845	-0.250572	2.64666	1.7538	0.852024	0.877861	2.21521	1.24565	0.365421	-0.157906	-0.546982	-0.605179	1.30263	3.2999	-0.564728	1.25246	3.1232	2.24895	0.71748	2.35433		10	5.43459	-1.26793	-2.04757	-0.434101	1.4767	-0.747238	0.23708	-2.2371	0.156071	-1.40997	-3.94741	-0.322632	1.25299	-1.96291	-3.80864	-3.68958	0.35881	-1.59163	-3.769	-1.59701	-0.447224	-0.828156
	10	5.46531	1.25715	1.69476	-0.188156	2.61152	1.74409	0.931847	1.16816	2.21114	1.5781	0.694138	-0.17382	-0.475353	-0.541378	1.16906	3.28292	-0.518066	1.62153	2.94482	2.37811	0.609837	2.39985		10	5.46531	-1.32583	-2.11624	-0.381054	1.30028	-0.574875	0.113617	-2.17521	0.122715	-1.73154	-4.028	-0.275711	1.48791	-1.95321	-4.07178	-3.77854	0.02314	-1.43855	-3.79234	-1.85226	-0.648327	-0.746712
	10	5.49603	1.24969	1.72689	-0.483414	2.28846	1.53957	1.34275	1.07754	2.18931	1.48977	1.0491	-0.274651	-0.483109	-0.377647	1.03678	3.17275	-0.421654	1.72699	2.95436	2.2953	0.683933	2.46087		10	5.49603	-1.46954	-2.50538	-0.560608	1.10505	-0.796543	0.0881996	-2.3153	0.434902	-1.8684	-4.12972	-0.165371	1.35393	-2.15225	-4.19223	-3.70416	-0.435577	-1.73325	-3.93285	-2.31097	-0.651127	-0.919136
	10	5.52675	1.33071	2.24735	-0.652245	2.08355	1.47754	1.2813	1.39332	2.6085	1.93776	1.30584	-0.205627	-0.24876	-0.486652	1.17447	2.98211	-0.504471	1.73042	3.02167	2.54725	0.483387	2.43745		10	5.52675	-1.62872	-2.93165	-0.487366	0.976208	-0.858768	-0.469021	-2.59053	0.573376	-1.98695	-4.27973	-0.400158	1.68373	-2.19859	-4.57085	-4.05889	-0.747833	-1.8294	-3.98577	-2.29985	-0.982197	-1.13005
	10	5.55747	1.40229	2.55962	-0.576763	2.20043	1.34367	1.1771	1.36201	2.21209	2.02707	1.43926	-0.0408897	-0.359848	-0.548042	1.44199	3.09172	-0.31321	2.11191	3.24326	2.64115	0.849407	2.1838		10	5.55747	-1.70359	-2.98911	-0.831783	0.962807	-1.12939	-0.737026	-2.81615	0.719265	-2.14727	-4.47142	-0.550369	1.78804	-1.89918	-4.85943	-3.98132	-0.924034	-1.96056	-3.91203	-2.4483	-0.703762	-1.1808
	10	5.58819	1.45477	2.49369	-0.57048	2.17731	1.58931	1.43171	1.51931	2.11231	2.22164	1.90144	-0.240993	-0.260845	-0.551884	1.3477	3.12978	-0.433884	2.25012	3.28026	2.78457	0.730854	2.18351		10	5.58819	-1.82883	-3.29676	-0.851467	0.729118	-1.09458	-0.951374	-3.06046	0.818565	-2.3631	-4.71224	-0.776344	1.83275	-2.16647	-5.04535	-3.91927	-1.40201	-1.94048	-3.66734	-2.5582	-0.884968	-1.26661
	10	5.61891	1.46081	2.76242	-0.405975	2.31394	1.29056	1.48014	1.18401	2.03702	2.26303	1.99223	-0.404503	-0.398605	-0.323608	1.09131	3.1058	-0.282127	2.30617	3.34833	2.50521	0.92403	2.42686		10	5.61891	-2.00258	-3.62285	-1.10129	0.365677	-1.4621	-1.15952	-3.14861	0.773575	-2.77762	-4.52248	-0.426823	1.69326	-2.31901	-5.26933	-4.02633	-1.67078	-2.30834	-3.70466	-3.13942	-0.784611	-1.44038
	10	5.64963	1.59081	2.7924	-0.277084	2.66003	1.49653	1.4644	1.45563	2.2906	2.55239	2.63978	-0.322773	-0.298813	-0.267315	1.14357	2.72478	-0.349411	2.53934	3.45892	2.7141	0.832741	2.56641		10	5.64963	-2.15297	-3.82061	-1.09509	0.340523	-1.50515	-1.65442	-3.18869	0.809624	-3.06122	-4.8601	-0.821682	1.49543	-2.16129	-5.30478	-4.30671	-2.23647	-2.43752	-3.52269	-3.31473	-0.929268	-1.48452
	10	5.68035	1.63809	2.772	-0.400238	2.63161	1.56463	1.68409	1.32766	2.20191	2.57764	2.8008	-0.0600739	-0.241924	-0.126411	1.22611	2.78712	-0.0210991	2.18539	3.82277	2.63693	0.851971	2.54085		10	5.68035	-2.2399	-3.56556	-1.40702	0.382339	-1.70628	-2.10097	-3.24547	0.740211	-3.18775	-4.84148	-0.992447	1.51162	-1.92001	-5.315	-4.52778	-2.50286	-2.62873	-3.29581	-3.69926	-0.907825	-1.58788
	10	5.71107	1.81221	2.96499	-0.200836	3.0933	1.62137	1.56733	1.74426	1.96213	2.80078	3.44274	0.08881	-0.11697	0.216278	1.30143	2.92253	-0.233398	2.36904	3.60029	3.28783	0.959438	2.85294		10	5.71107	-2.36746	-3.76089	-1.19522	0.13858	-1.89003	-2.20581	-3.38428	0.932972	-3.49228	-5.0797	-1.04889	1.58856	-2.06824	-5.5346	-4.67884	-2.77556	-2.73488	-3.24408	-4.0299	-0.92469	-1.96142
	10	5.74179	1.87205	2.91093	-0.174503	3.1146	1.70566	1.55018	1.58403	1.9806	3.03911	3.54094	0.269421	-0.30444	0.609062	1.32784	2.98743	0.141277	2.73376	3.57517	3.07771	0.960869	2.81141		10	5.74179	-2.48891	-4.25386	-1.42529	-0.205299	-2.3064	-2.26826	-3.59645	1.17242	-3.8934	-5.1706	-0.95549	1.66809	-2.0325	-5.53545	-4.63831	-3.15134	-2.92413	-3.20445	-4.22622	-0.603516	-2.22781
	10	5.77251	2.03752	2.83592	0.152634	3.12169	2.07697	1.58825	1.71695	2.14571	3.57982	3.70575	0.482426	-0.021244	0.572689	1.60849	2.88393	0.304977	2.84439	3.6115	3.05216	1.18708	3.30024		10	5.77251	-2.54002	-4.3141	-1.626	-0.127502	-2.07436	-2.58732	-3.84659	1.05848	-3.85384	-5.23728	-1.33178	1.60386	-1.98291	-5.33421	-4.34398	-3.68645	-2.82804	-2.95094	-4.43036	-0.84531	-2.06178
	10	5.80323	2.06815	2.77934	0.405594	3.43304	2.35138	1.54936	1.72969	2.08453	3.95621	3.6262	0.439201	0.167011	0.457096	1.35221	2.59797	0.32431	2.87813	3.81724	2.95521	1.09196	3.36721		10	5.80323	-2.60428	-4.61562	-1.55912	-0.392673	-1.94733	-2.97506	-3.85534	0.860088	-3.92352	-5.40434	-1.23277	1.39946	-1.93666	-5.24668	-4.79447	-3.64932	-2.89494	-2.64842	-4.60697	-0.884636	-1.77729
	10	5.83395	2.19077	3.04503	0.47364	3.49019	2.88216	1.336	1.63036	2.17174	4.23606	3.89405	0.339611	0.199085	0.827885	1.37648	2.5118	0.457302	2.95128	3.66605	3.1408	1.4567	3.72913		10	5.83395	-2.69047	-4.44808	-1.92877	-0.593269	-2.21341	-3.07465	-3.69299	1.06968	-3.96511	-5.22368	-1.67722	1.27431	-1.66938	-5.19809	-5.09858	-4.13627	-3.06645	-2.91596	-4.57687	-0.857136	-1.81751
	10	5.86467	2.28098	2.87724	0.521942	3.78301	3.12061	1.28883	1.49503	2.07864	4.59989	3.97103	0.553093	0.0996895	1.12347	1.2937	2.58624	0.836922	2.94744	3.89215	3.06743	1.62144	3.86185		10	5.86467	-2.83437	-4.6355	-2.06614	-0.995361	-2.55978	-3.25927	-3.845	1.14719	-4.50904	-5.4553	-1.88301	1.01372	-1.86528	-5.23792	-5.10735	-4.14771	-3.04708	-2.73609	-4.90075	-0.818115	-1.77968
	10	5.89539	2.41196	2.82276	0.583241	3.901	3.47515	1.13382	1.69393	2.18273	4.86386	4.2182	0.856812	0.410267	1.31554	1.39784	2.7937	0.934952	2.97744	3.5541	3.34681	1.72204	4.05497		10	5.89539	-2.86967	-4.64899	-2.37583	-1.43701	-2.14725	-3.14341	-3.71911	1.1167	-4.54528	-5.25393	-2.03278	0.949619	-1.87494	-5.43307	-5.1751	-4.43472	-3.16441	-2.48175	-4.97353	-0.97892	-1.63966
	10	5.92611	2.48566	2.90406	0.733284	3.9804	3.83034	0.954971	1.70277	2.26783	5.08162	4.21506	0.775227	0.460789	1.52421	1.16975	2.89838	1.00114	2.96421	3.63773	3.37393	1.97211	4.26546		10	5.92611	-2.87375	-4.95001	-2.29145	-1.05345	-2.3264	-3.21546	-3.51556	1.09584	-4.63729	-5.40714	-2.07929	1.02394	-1.71132	-5.37263	-5.18962	-4.16537	-3.08304	-2.40762	-5.22067	-1.29863	-1.66972
	10	5.95683	2.56534	3.16605	1.16534	4.24416	3.93207	0.8535	1.47027	2.22564	5.32616	4.36972	1.18713	0.60149	1.46539	1.24589	3.08462	1.29959	2.83598	3.31622	3.19827	1.82013	4.49926		10	5.95683	-2.87046	-5.00895	-2.31266	-0.904095	-2.49931	-3.30961	-3.70494	1.06236	-4.49971	-5.44517	-1.98274	0.903725	-1.88428	-5.12079	-5.26863	-4.35518	-3.15463	-2.12446	-5.00247	-1.12669	-1.67091
	10	5.98755	2.58603	2.78299	0.884682	4.36217	3.81534	0.665771	1.39287	2.22812	5.31932	4.12942	1.422	0.520584	1.81025	1.2674	3.21317	1.57285	2.80913	3.03373	3.4305	1.97851	5.08183		10	5.98755	-2.93402	-5.08581	-2.29424	-1.37984	-2.77736	-3.31042	-3.52969	1.07656	-4.81367	-5.44034	-2.17287	0.674416	-2.00434	-5.08878	-5.1162	-4.66159	-3.11238	-1.87467	-5.00943	-1.03164	-1.72804
	10	6.01827	2.62322	2.63026	0.890823	4.6515	3.96676	0.528606	1.5499	1.89725	5.06588	4.11287	1.47013	0.681099	1.8413	1.35338	3.11134	1.85978	2.83861	2.99545	3.54081	1.99986	5.47883		10	6.01827	-2.92425	-5.22128	-2.31209	-1.95386	-2.60211	-3.21394	-3.49393	1.05335	-4.91177	-5.36559	-2.29197	0.851036	-1.88414	-4.89393	-5.09114	-4.80281	-3.12128	-1.55881	-4.70777	-1.09313	-1.86974
	10	6.04899	2.66277	2.46522	0.847393	4.7293	3.9991	0.52	1.68399	1.83261	4.56607	4.33076	1.50581	0.734398	1.98067	1.2788	3.2775	1.76909	2.82444	3.31344	3.53236	2.40464	5.65977		10	6.04899	-2.91521	-5.21399	-2.3552	-1.91148	-2.5956	-3.30995	-3.27063	0.986294	-4.84506	-5.45305	-2.49197	0.828243	-2.19877	-4.87076	-4.79661	-5.02634	-2.75893	-1.33673	-4.36098	-1.40619	-1.91653
	10	6.07971	2.671	2.59174	0.944477	4.73867	4.19034	0.442356	1.40961	1.75907	5.02296	4.44379	1.38857	0.838802	1.80026	1.67867	3.32738	1.774	2.55272	3.02717	3.51047	2.34695	5.63204		10	6.07971	-2.92379	-5.35966	-2.63932	-2.05985	-2.85147	-3.47517	-3.07419	1.22739	-4.63214	-5.33321	-2.60091	0.621128	-2.11277	-4.67117	-4.95443	-4.76422	-2.5101	-1.58004	-4.26927	-1.40211	-2.03435
	10	6.11043	2.72564	2.9207	0.482185	4.66875	4.55149	0.431358	1.65452	1.69631	4.86802	4.61171	1.49855	1.07393	1.69295	1.47079	3.3208	1.81004	2.32297	3.35756	3.56588	2.71312	5.8012		10	6.11043	-2.88171	-5.69344	-2.2831	-2.05096	-2.71928	-3.51408	-3.10299	1.18239	-4.66114	-5.55124	-2.46599	0.87463	-1.72099	-4.52928	-4.62412	-5.10659	-2.48563	-1.48438	-4.3592	-1.29946	-2.03943
	10	6.14115	2.60788	2.59653	0.319809	4.571	4.34454	0.42094	1.45325	1.27057	4.43811	4.41155	1.49321	1.04797	1.88134	1.64797	3.25	2.04419	1.52948	3.28304	3.4838	2.93849	5.73185		10	6.14115	-2.82483	-5.44073	-1.92717	-2.36982	-2.74324	-3.12807	-2.94727	1.17394	-4.69534	-5.31701	-2.43132	0.776447	-2.068	-4.45747	-4.46349	-5.08905	-2.52571	-1.5551	-4.13075	-1.24856	-1.90891
	10	6.17187	2.6424	2.44701	0.314289	4.61089	4.22864	0.676834	1.45089	1.3218	4.18521	4.38951	1.42174	1.14684	2.28987	1.70325	2.99669	1.91125	1.80644	3.32119	3.46355	3.52527	5.63681		10	6.17187	-2.75681	-5.46883	-2.00723	-2.31167	-2.74227	-3.10942	-2.87967	1.35936	-4.28531	-5.08667	-2.48504	0.768066	-1.74346	-4.50918	-4.25038	-5.36015	-2.27089	-1.23883	-3.88064	-1.49357	-2.14041
	10	6.20259	2.61406	2.55093	0.323914	4.66976	4.22145	0.388275	1.5123	1.36825	4.2054	4.05863	1.38013	1.18797	2.40839	1.70004	2.89038	1.73418	1.98978	3.16393	3.56504	3.54533	5.41706		10	6.20259	-2.71988	-5.52392	-1.80145	-2.21826	-2.75176	-2.93394	-2.63066	1.37794	-4.5229	-5.03959	-2.53899	0.748814	-1.97545	-4.48662	-3.93918	-5.44461	-2.05564	-1.57254	-3.6854	-1.40006	-2.00344
	10	6.23331	2.51997	2.21601	0.260193	4.45251	4.04506	0.316059	1.51043	1.06426	3.92384	4.01284	1.443	1.371	2.40695	1.98532	2.51635	1.75576	1.88078	3.08124	3.19919	3.77673	5.18185		10	6.23331	-2.66909	-5.89486	-1.52865	-2.16508	-2.60496	-2.67457	-2.65607	1.33703	-4.17065	-5.12458	-2.47097	0.729729	-1.87601	-4.57391	-3.85688	-5.39987	-1.94247	-1.2381	-3.48972	-1.74551	-2.03578
	10	6.26403	2.40617	2.00962	0.0303078	4.08728	4.06322	0.199398	1.36386	0.962536	3.57865	3.84834	1.5585	1.44734	2.40629	1.95929	2.50577	1.75135	1.53931	3.25345	2.88293	3.6363	5.0396		10	6.26403	-2.5662	-5.65194	-1.56609	-1.93763	-2.40452	-2.7084	-2.37382	1.2486	-4.38818	-4.95106	-2.57047	0.971737	-2.10212	-4.35837	-3.45345	-5.42778	-1.89211	-1.16741	-3.14154	-1.52287	-1.92656
	10	6.29475	2.39919	2.07386	-0.00876617	4.32916	4.03024	0.233002	1.72937	1.00142	3.24251	3.7509	1.65697	1.30935	2.71573	1.98888	2.12871	1.91512	1.42699	3.0693	2.62593	4.04472	4.72049		10	6.29475	-2.52495	-5.75988	-1.65158	-1.97369	-2.08967	-2.67221	-2.15779	1.4697	-4.15901	-4.91391	-2.66811	0.700665	-2.12639	-4.37409	-3.64214	-5.43977	-1.76852	-0.960964	-2.80141	-1.56443	-1.94572
	10	6.32547	2.3143	1.96338	-0.228645	4.20328	4.15975	-0.455273	1.79816	0.80603	3.11979	3.43514	1.68829	1.03012	2.61174	2.12733	2.17525	1.86845	1.38099	3.0852	2.84883	4.28824	4.37994		10	6.32547	-2.49667	-5.6274	-1.45644	-2.38589	-2.01371	-2.3805	-2.21912	1.34211	-4.07612	-4.82615	-2.663	0.536121	-2.22707	-4.51082	-3.60173	-5.31372	-1.64383	-0.84203	-2.60772	-1.51391	-1.90253
	10	6.35619	2.22446	1.84725	-0.209137	4.30588	4.12115	0.0109634	1.78216	0.778954	3.03854	3.40577	1.29659	1.08723	2.40254	2.28716	1.88063	1.56453	1.09264	2.69605	2.57472	4.29688	4.22875		10	6.35619	-2.41663	-5.37522	-1.29113	-2.10468	-1.80832	-2.49485	-1.89939	1.34354	-3.82556	-4.5859	-2.87218	0.622772	-1.99455	-4.51184	-3.46111	-5.36315	-1.5045	-0.697193	-2.23598	-1.98362	-2.28971
	10	6.38691	2.12319	1.80235	-0.387115	4.13885	4.07053	0.340782	1.8137	0.561699	2.72115	2.82283	1.22782	1.11122	2.53701	2.04655	1.92134	1.48064	1.15701	2.4727	2.41784	4.17155	4.03543		10	6.38691	-2.37592	-5.69051	-1.20504	-2.24023	-2.03924	-2.6071	-1.82516	1.51257	-3.5793	-4.57832	-3.0412	0.637032	-1.93079	-4.32772	-3.26041	-5.14001	-1.47135	-0.623497	-1.85232	-1.79835	-2.45744
	10	6.41763	2.095	1.83334	-0.160461	3.97059	4.02925	0.577698	1.82999	0.422516	2.62157	2.7663	1.41909	0.978237	2.66194	2.29845	1.73959	1.28746	0.85413	2.34704	2.34061	4.05932	4.02333		10	6.41763	-2.22646	-5.56905	-1.20018	-1.89383	-1.91543	-2.36483	-1.75206	1.40939	-3.39079	-4.49063	-2.74391	0.413029	-1.95556	-4.09102	-2.89195	-5.0292	-1.35141	-0.348778	-1.32632	-1.78153	-2.25521
	10	6.44835	1.94914	1.28768	-0.321335	4.11024	3.83674	0.478611	1.64594	0.650757	2.2076	2.72752	0.863766	0.98624	2.32558	2.21354	1.40881	1.38936	0.730476	2.10283	2.48069	3.9337	3.92416		10	6.44835	-2.19951	-5.61102	-0.989353	-1.90947	-1.90788	-2.58147	-1.9315	1.53009	-3.37607	-4.41113	-2.83472	0.654163	-2.1498	-4.47937	-2.76617	-5.02908	-0.987881	-0.191624	-0.968811	-1.69625	-2.35279
	10	6.47907	1.92777	1.44712	-0.513725	4.16016	3.87743	0.766144	1.71338	0.532753	2.23336	2.42715	0.9202	1.12803	2.17801	2.27823	1.12936	1.25499	0.787079	2.00324	2.51867	3.946	3.76783		10	6.47907	-2.11096	-5.6252	-1.27253	-1.84327	-1.75159	-2.44353	-1.66714	1.23605	-3.081	-4.02555	-2.8598	0.486816	-2.06073	-4.37163	-2.79374	-5.16295	-0.757698	0.196461	-0.392754	-1.52778	-2.50161
	10	6.50979	1.82936	1.53516	-0.596359	4.14646	3.36857	0.70612	1.86205	0.430878	2.04795	2.29955	0.729046	1.13452	2.03334	2.25235	0.937065	1.24476	0.796307	1.88228	2.48358	3.78861	3.50494		10	6.50979	-2.02499	-5.53547	-1.11566	-1.77316	-1.66224	-2.34471	-1.81816	1.46401	-3.01466	-3.83109	-2.80695	0.539341	-2.04594	-4.77345	-2.56495	-5.15122	-0.543957	0.329311	0.0843086	-1.60501	-2.3301
	10	6.54051	1.75237	1.32776	-0.548859	4.12992	3.54913	0.65366	1.83195	0.647228	2.08744	1.9742	0.758774	1.01219	2.01206	2.37383	0.803177	0.793934	0.288689	1.76804	2.38934	3.79168	3.40328		10	6.54051	-1.96703	-5.22189	-1.14892	-1.82883	-1.39349	-2.29853	-1.92443	1.13975	-2.93715	-3.78861	-2.79374	0.308968	-2.27125	-4.83291	-2.52017	-4.90284	-0.394444	0.705318	0.517132	-1.46113	-2.29338
	10	6.57123	1.65351	1.05137	-0.61739	4.21045	3.42956	0.982258	1.72437	0.397438	2.09786	1.85518	0.790215	0.836357	1.80844	2.32972	0.762623	0.448074	0.309704	1.58846	2.12744	3.53328	3.40473		10	6.57123	-1.9077	-5.34952	-1.12622	-1.76148	-1.53137	-2.46209	-1.98057	1.16549	-2.62619	-3.20629	-2.98172	0.286175	-2.09388	-4.98851	-2.41179	-5.00257	-0.0452538	0.845974	0.834984	-1.45126	-2.26782
	10	6.60195	1.55741	1.20086	-0.504776	4.248	3.25085	0.892399	1.53294	0.330772	2.05775	1.55602	0.558624	0.729084	1.88552	2.31462	0.352543	0.447441	0.157436	1.11988	2.19577	3.54794	3.27444		10	6.60195	-1.83336	-5.17538	-1.13198	-1.58485	-1.39484	-2.28198	-2.09203	0.958229	-2.65491	-3.30687	-3.01469	0.359676	-1.89983	-4.63967	-2.15575	-5.0136	-0.239544	1.05846	1.42579	-1.46919	-2.4143
	10	6.63267	1.46319	1.08071	-0.569122	3.85818	3.41469	0.9534	1.39201	0.374882	1.69836	1.26732	0.37001	0.632141	1.86625	2.10506	0.315777	0.395107	0.0521393	1.18126	2.38354	3.51302	2.97916		10	6.63267	-1.77973	-5.2275	-0.978046	-1.4368	-1.18139	-2.18059	-1.99604	1.09419	-2.70683	-3.19525	-2.99891	0.298069	-2.15869	-4.70494	-2.08451	-4.80432	-0.392513	1.18738	1.72687	-1.37825	-2.47649
	10	6.66339	1.33812	1.35241	-0.600857	3.88906	3.03532	1.04187	1.08681	0.374142	1.37722	0.873978	0.294312	0.651646	1.51102	1.88008	0.0309868	0.134899	0.0753365	1.2765	2.17987	3.41973	2.87802		10	6.66339	-1.66327	-5.14611	-1.15066	-1.32362	-1.44201	-2.14782	-1.63472	1.14632	-2.49256	-2.7162	-2.97298	0.624775	-2.1418	-4.66827	-2.02101	-4.69524	-0.289658	1.14111	2.19109	-1.17435	-2.35166
	10	6.69411	1.20655	1.08988	-0.569897	3.61934	2.69419	1.1008	1.07207	0.462326	1.36424	1.01953	0.165779	0.543507	1.4192	1.76897	-0.269371	-0.267075	-0.312366	1.30157	1.98367	3.15551	2.78911		10	6.69411	-1.52427	-4.74718	-0.996437	-1.03699	-1.31155	-2.50936	-1.82886	1.37661	-2.21255	-2.53659	-2.72084	0.50148	-1.82412	-4.70632	-1.81507	-4.80758	0.472195	1.18689	2.41844	-1.12257	-2.265
	10	6.72483	1.07449	1.11452	-0.826004	3.30111	2.34865	1.16018	0.924408	0.6035	1.26701	0.61937	0.281391	0.410816	1.36624	1.64738	-0.499741	-0.0827408	-0.432327	0.917271	1.5544	3.2191	2.5953		10	6.72483	-1.47561	-4.74952	-1.12704	-1.02817	-1.58153	-2.53747	-1.53629	1.21693	-1.79813	-2.31252	-2.52024	0.24538	-2.04891	-4.63058	-1.54427	-5.2668	0.527626	1.44688	2.85451	-1.10798	-2.01409
	10	6.75555	1.04298	1.03774	-0.530678	2.94849	2.64026	1.18315	1.05618	0.374969	1.09962	0.849342	0.208099	0.345406	1.32769	1.4135	-0.496181	-0.374443	-0.374615	1.0587	1.43427	3.17849	2.47957		10	6.75555	-1.33053	-4.94484	-0.809231	-0.641582	-1.29505	-1.99455	-1.68117	1.30048	-1.5804	-1.90786	-2.6743	-0.0294533	-1.87288	-4.69354	-1.37369	-5.05774	0.893696	1.82503	2.87692	-1.10995	-1.84045
	10	6.78627	0.850625	1.07166	-0.524857	2.67203	2.26301	1.09688	0.967148	0.053009	0.919086	0.247272	0.0314102	-0.0677757	1.1085	1.43553	-0.807053	-0.520683	-0.636875	0.840775	1.52892	3.14647	2.18804		10	6.78627	-1.25293	-4.68842	-1.02852	-0.437569	-1.33325	-1.84227	-1.09131	1.16576	-1.4716	-1.76875	-2.60571	-0.0344505	-1.96221	-4.95245	-1.50463	-4.62879	0.764614	2.08187	3.15208	-1.30382	-1.56923
	10	6.81699	0.786419	1.00504	-0.339455	2.59523	2.11023	1.15187	0.822414	0.0860748	1.01084	0.206718	-0.0984917	-0.0911751	1.07256	1.27402	-1.09288	-0.806721	-0.517071	0.495029	1.51266	3.56089	1.77059		10	6.81699	-1.176	-4.81253	-1.18392	-0.294327	-1.21324	-1.65445	-1.03484	1.11193	-1.24599	-1.71792	-2.51159	-0.0321159	-1.59963	-4.80736	-1.58504	-4.77234	0.85836	2.13546	3.59842	-1.12192	-1.63689
	10	6.84771	0.657135	0.940971	-0.593727	2.10273	1.94894	1.04049	0.845722	0.0879822	1.03269	0.245094	-0.118198	-0.26931	0.81842	0.917301	-1.20551	-0.786423	-0.67786	0.389069	1.43721	3.11319	1.87392		10	6.84771	-1.07222	-4.45102	-0.954037	-0.271339	-1.28344	-1.99564	-0.572376	1.25981	-1.0512	-1.33449	-2.22536	-0.137211	-1.85239	-4.35582	-1.56423	-4.40144	0.653393	1.94281	3.73748	-1.05369	-1.53424
	10	6.87843	0.634149	1.00419	-0.554104	1.79129	1.99588	1.33974	0.889946	0.03442	1.03921	0.412819	-0.19175	-0.394718	1.13517	0.916393	-1.29646	-1.04795	-0.751118	0.177711	1.42302	3.0202	1.7391		10	6.87843	-0.98762	-4.55745	-0.853233	-0.151405	-1.06852	-2.02333	-0.460011	1.50096	-0.485958	-0.792564	-2.51863	-0.0402451	-1.69416	-4.43679	-1.63163	-4.58459	0.896595	2.08661	3.5759	-0.858234	-1.6557
	10	6.90915	0.574372	0.753479	-0.11256	1.49305	1.75669	1.23651	0.775326	0.00255585	1.21303	0.393303	-0.441067	-0.702763	1.14841	1.15877	-1.61456	-0.783428	-0.696434	0.0773354	1.35733	2.89748	1.57497		10	6.90915	-0.875345	-4.00314	-1.14664	-0.23085	-0.83147	-2.12361	0.119465	1.29215	-0.399696	-0.381683	-2.26868	0.133492	-1.70992	-4.31465	-1.34591	-4.48204	1.12543	2.18815	3.46999	-0.926548	-1.67075
	10	6.93987	0.574875	0.676399	-0.123016	1.53532	1.89508	1.05688	0.886349	-0.116867	1.17204	0.375793	-0.248161	-0.586464	1.36174	1.09585	-1.95783	-1.11147	-0.535324	0.230171	2.07171	2.40634	1.41297		10	6.93987	-0.808423	-3.93804	-0.985538	-0.0173454	-0.527153	-2.03354	0.0771217	1.23529	-0.21331	-0.305618	-2.35792	0.116253	-1.63651	-4.19518	-1.33952	-4.30107	1.34859	2.03661	3.45061	-0.997787	-1.58442
	10	6.97059	0.468702	0.513073	-0.477722	1.47999	1.8313	0.965725	0.895859	-0.351318	1.4222	0.31274	-0.426315	-0.580791	1.24072	1.07356	-1.98518	-1.06337	-0.651825	-0.0746231	1.40017	2.45124	1.39861		10	6.97059	-0.729976	-3.81947	-1.07127	-0.0745506	-0.73867	-1.79216	0.501278	1.219	0.158035	-0.113644	-2.26326	0.196888	-1.91158	-3.94306	-1.24915	-4.12674	1.19993	1.98511	3.57611	-0.820751	-1.51157
	10	7.00131	0.432623	0.395279	-0.37804	1.36914	1.71539	0.75346	0.702896	-0.583511	1.46052	0.308228	-0.58601	-0.488083	1.37827	1.04515	-2.064	-1.03829	-0.620831	-0.236374	1.41875	2.46634	1.63417		10	7.00131	-0.660845	-3.59839	-0.997402	-0.233162	-0.943901	-1.77015	0.72884	1.07251	0.634109	0.191296	-1.93328	0.21278	-1.52634	-4.00189	-0.884731	-4.44049	1.13554	1.99986	3.25643	-0.572449	-1.54608
	10	7.03203	0.397414	0.339123	-0.518444	1.13469	1.56322	0.965092	0.609329	-0.378078	1.24052	0.320133	-0.612297	-0.583141	1.47117	1.16519	-2.05458	-0.930523	-0.555027	-0.403854	1.22446	2.37233	1.57897		10	7.03203	-0.498833	-3.20071	-0.857342	-0.269806	-0.637638	-1.64903	1.0597	1.24742	0.682762	0.390816	-1.78904	0.612774	-1.44313	-3.73536	-0.63699	-3.94956	1.19339	2.04712	2.97294	-0.506863	-1.50811
	10	7.06275	0.339043	0.341888	-0.575584	0.909618	1.40052	0.831432	0.849163	-0.389656	0.970142	0.0875702	-0.732864	-0.558132	1.73383	1.27804	-2.21382	-0.992451	-0.53299	-0.701294	1.34056	2.10098	1.63391		10	7.06275	-0.417742	-3.04371	-1.05107	-0.288834	-0.49194	-1.36658	1.02339	0.909466	0.910404	0.667416	-1.3673	0.59053	-1.31803	-3.59882	-0.320538	-3.79452	1.13855	2.07496	2.79839	-0.379189	-1.44742
	10	7.09347	0.310411	0.160976	-0.478714	0.623039	1.11922	0.671646	0.581005	0.0507202	0.966423	-0.0136299	-0.739765	-0.486366	1.70548	1.24814	-2.27814	-0.739891	-0.423508	-0.78598	1.51007	2.11636	1.40113		10	7.09347	-0.341191	-2.5491	-0.761944	-0.277935	-0.451351	-1.23425	1.01227	0.626888	1.08155	0.676632	-1.10429	0.636497	-1.49469	-3.37505	0.0589066	-3.5998	1.26007	2.12664	2.6439	-0.549801	-1.54896
	10	7.12419	0.233978	0.122925	-0.382236	0.434513	1.11572	0.418255	0.466312	-0.487106	0.943939	-0.0697556	-0.754944	-0.42786	1.80955	1.24714	-2.64525	-0.865395	-0.235882	-0.660061	1.55774	1.87491	1.21705		10	7.12419	-0.278444	-2.42126	-0.809124	-0.295254	-0.502716	-1.03701	0.984234	0.892071	0.901829	0.993477	-0.995964	0.486198	-1.21931	-3.06503	0.254948	-3.6918	1.2836	2.15174	2.54613	-0.245354	-1.78029
	10	7.15491	0.197415	0.301167	-0.439598	0.668617	0.977779	0.368511	0.556412	-0.782127	0.859203	-0.157635	-0.784744	-0.425735	1.92461	1.05505	-2.6389	-0.941093	-0.469341	-0.704437	1.54167	1.6753	1.36358		10	7.15491	-0.129327	-1.74771	-0.777916	-0.0283356	-0.392948	-1.36596	1.29945	0.659122	1.1827	1.39248	-0.665882	0.950993	-1.16526	-2.88505	0.495117	-3.59781	1.50723	2.15936	2.31667	-0.338314	-1.58449
	10	7.18563	0.075469	0.0302391	-0.441402	0.496273	0.815155	0.000663757	0.435333	-1.00319	0.643284	-0.493385	-1.11468	-0.550049	2.04335	1.00908	-2.68745	-0.855286	-0.27142	-0.809669	1.60896	1.49083	1.16274		10	7.18563	-0.0897684	-1.74869	-0.825298	-0.204082	-0.501404	-1.18472	1.35228	0.667587	1.31377	1.63938	-0.21587	0.83939	-1.19617	-2.5699	0.957077	-3.52161	1.11359	2.05873	2.026	-0.0998802	-1.69555
	10	7.21635	0.0344177	-0.0886002	-0.413841	0.394196	0.571991	-0.0737953	0.371269	-1.26821	0.734463	-0.638153	-1.203	-0.370018	1.76489	0.912445	-2.69249	-0.782093	-0.0467186	-0.600586	1.49154	1.48047	1.1446		10	7.21635	0.00400162	-1.29841	-0.861599	-0.161739	-0.607407	-1.27663	1.34454	0.976482	1.70405	1.87396	0.197384	0.852989	-1.31307	-2.45944	1.10875	-3.35942	1.2381	2.0579	1.86307	-0.232727	-1.56675
	10	7.24707	0.00474052	0.0736542	-0.177998	0.253513	0.443111	-0.0666656	0.0322838	-1.19248	0.479778	-0.700871	-1.19809	-0.374535	1.9106	0.968689	-2.62398	-0.922615	0.128971	-0.687954	1.67868	1.199	0.871727		10	7.24707	0.109199	-0.75811	-0.82119	-0.210796	-0.39922	-1.14075	1.23622	1.18097	1.69591	2.04983	0.364166	0.827614	-1.17317	-2.19177	1.35909	-3.2814	1.23272	1.77699	1.95753	0.0281105	-1.54875
	10	7.27779	0.0430162	-0.244087	-0.24683	0.29282	0.278294	0.101372	0.102165	-1.18629	0.798588	-0.638248	-1.27928	-0.360268	2.25447	1.06865	-2.63302	-0.795158	0.0482445	-0.629326	1.86077	1.15019	0.917274		10	7.27779	0.0987724	-0.348209	-1.0079	-0.0834579	-0.237736	-1.33428	1.29959	1.05957	1.61674	2.02134	0.389271	0.679066	-1.11766	-2.11195	1.39691	-3.26952	1.05141	1.90299	1.75101	-0.104328	-1.57741
	10	7.30851	0.0119904	-0.303905	-0.209137	0.146313	0.424484	-0.205307	0.110878	-1.16397	0.699966	-1.08025	-1.35862	-0.18504	2.50531	1.08338	-2.3828	-0.720654	0.100243	-0.687916	1.83365	0.917976	0.715202		10	7.30851	0.101776	-0.33532	-1.16592	0.0121155	-0.248226	-1.04029	0.996784	1.09477	1.89367	2.39029	0.39286	0.786961	-1.33947	-2.07249	1.40129	-3.19633	0.803715	1.8397	1.22059	0.156094	-1.55527
	10	7.33923	0.107384	-0.149517	-0.0567856	0.259346	0.533295	-0.0493584	0.266651	-1.11858	0.556057	-1.08289	-1.2213	-0.139263	2.5801	0.828499	-2.31141	-0.734196	0.343311	-0.107357	1.95301	0.750717	1.04736		10	7.33923	0.218324	-0.221428	-0.817184	0.108875	-0.33041	-0.904827	1.18411	1.14053	1.96058	2.29039	0.789375	0.986744	-0.950005	-1.63203	1.43507	-3.24012	0.859711	1.89586	1.36713	-0.0244598	-1.53144
	10	7.36995	0.0203854	-0.520401	-0.0948868	0.454765	0.362373	-0.184429	-0.205395	-1.32388	0.662716	-1.39139	-1.31921	-0.0843773	2.77115	0.859352	-2.35427	-0.73571	0.415154	-0.0751114	1.65753	0.577602	0.936131		10	7.36995	0.239665	0.281143	-0.922016	0.0808258	-0.300896	-0.637783	1.26663	1.09193	1.64869	2.31441	0.885777	1.10505	-1.07815	-1.58688	1.63284	-2.97576	0.854061	1.83971	0.654129	0.263741	-1.62414
	10	7.40067	0.108197	-0.296024	-0.00135422	0.727314	0.154022	-0.0608253	0.126755	-1.15853	0.652164	-1.58118	-1.42759	0.180584	2.86542	0.758808	-2.11133	-0.77277	0.4655	0.0453148	1.90589	0.562469	1.12932		10	7.40067	0.366397	0.707069	-0.525776	0.2733	0.195087	-0.830357	0.97168	1.25971	2.14914	2.61569	1.28122	1.34695	-1.17614	-1.44627	1.47725	-3.15805	0.787502	2.0993	0.667267	0.355595	-1.72223
	10	7.43139	0.128991	-0.564507	0.118347	0.526875	0.316406	-0.224674	0.0883942	-1.01176	0.766174	-1.60867	-1.621	0.246212	3.0628	0.679646	-1.66804	-0.924168	0.443981	0.254433	1.89002	0.721272	1.08809		10	7.43139	0.473955	0.882832	-0.612049	0.132206	0.401257	-0.69075	0.91235	1.30226	2.08957	2.77679	1.10466	1.34322	-1.07994	-1.29728	1.89985	-2.81067	0.903435	2.03129	1.10812	0.739017	-1.65707
	10	7.46211	0.188018	-0.508232	0.257568	0.727444	0.559761	0.0165672	0.177197	-0.87077	0.992184	-1.59084	-1.52084	0.447819	3.06389	0.708981	-1.8657	-1.00672	0.343773	0.469727	1.95127	0.523418	0.883869		10	7.46211	0.474101	1.07485	-0.655067	0.20385	0.400414	-0.81469	0.593441	1.57182	1.95348	2.73397	0.821453	1.53717	-0.844765	-0.884853	1.76379	-2.91267	0.943287	2.09463	0.677696	0.663822	-1.43962
	10	7.49283	0.152457	-0.564785	0.171669	0.915009	0.306801	0.207745	-0.136364	-0.750381	0.907188	-1.68471	-1.72578	0.435566	3.27482	0.434624	-1.7014	-1.28065	0.212109	0.982395	1.74582	0.441593	0.857883		10	7.49283	0.430485	1.04586	-0.472488	0.307228	0.256958	-0.692619	0.378208	1.35937	1.82631	2.71405	0.728016	1.56183	-0.942921	-0.852783	1.59019	-2.69529	0.858383	1.99997	0.128738	0.91967	-1.40898
	10	7.52355	0.205425	-0.43494	0.304146	1.12527	0.306381	0.508137	0.128178	-0.729473	0.909477	-1.97367	-1.70921	0.658985	3.13838	0.563915	-1.55	-1.40456	0.221607	1.1231	1.65927	0.321827	0.941677		10	7.52355	0.461668	1.162	-0.607361	0.210266	0.328182	-0.74202	0.274391	2.12423	1.81659	2.88795	0.852486	1.36541	-0.722862	-0.723728	1.46542	-2.71717	0.765751	2.08173	-0.011776	1.1959	-1.77205
	10	7.55427	0.228177	-0.61137	0.405094	1.54793	0.363541	0.107655	-0.397884	-0.686234	1.01344	-2.14257	-1.81562	0.406487	3.21096	0.597805	-1.3549	-1.28159	0.750443	1.35683	2.01172	0.191029	0.890774		10	7.55427	0.486419	1.23493	-0.612	-0.0706558	0.0254631	-0.764328	0.368446	1.58928	2.06821	2.97393	0.956268	1.56817	-0.62748	-0.685177	1.89109	-2.51519	0.647621	2.03227	-0.329803	1.51896	-1.54162
	10	7.58499	0.21137	-0.749462	0.522015	1.70996	0.477913	0.0544662	-0.591076	-0.701839	1.30869	-2.05402	-1.87524	0.632675	3.17753	0.427837	-1.3259	-1.29851	0.468075	1.49429	1.87693	0.0461273	0.626942		10	7.58499	0.513765	1.54498	-0.894505	0.0950623	0.121712	-0.607983	0.358608	1.46263	1.86124	3.22855	0.704067	1.58411	-0.611149	-0.43964	1.73114	-2.346	0.810413	1.88928	-0.403687	1.55432	-1.36785
	10	7.61571	0.217944	-0.716396	0.536041	1.50795	0.597797	0.235554	-0.655579	-0.46373	1.03994	-2.03311	-1.83215	0.520702	3.14511	0.541538	-1.30306	-1.50333	0.590908	1.72293	1.70658	0.131329	0.589851		10	7.61571	0.523954	1.72358	-0.490692	-0.0555153	0.125694	-0.376564	0.183002	1.55017	1.73428	3.42041	0.363667	1.74315	-0.441147	-0.804871	1.56311	-2.21202	0.640842	1.73347	-0.543602	1.7771	-1.15498
	10	7.64643	0.263248	-0.438694	0.767952	1.46318	0.594795	0.491367	-0.492107	-0.710449	1.27593	-2.04388	-1.83981	0.909588	3.11661	0.404488	-1.24318	-1.55444	0.632401	1.69453	1.4363	0.216286	0.584099		10	7.64643	0.57105	1.5006	-0.607338	0.0215187	0.426212	-0.278835	0.0398102	1.38636	2.05465	3.59826	0.326855	1.78027	-0.257206	-0.27203	1.38115	-2.18994	0.453598	1.76012	-0.396545	2.00818	-1.31467
	10	7.67715	0.250217	-0.656361	0.670166	1.59765	0.900414	0.650902	-0.469635	-0.805767	1.12067	-1.89447	-1.69143	0.852798	2.79121	0.120266	-1.34927	-1.53792	0.56369	2.06123	1.2318	0.173649	0.674751		10	7.67715	0.57382	1.52506	-0.473774	0.273071	0.146507	-0.216022	0.0142517	1.48248	1.88884	3.37138	0.0503349	1.74918	-0.16959	-0.124275	1.54704	-1.69736	0.195843	1.75775	-0.58046	2.15617	-1.42003
	10	7.70787	0.205921	-0.596947	0.736614	1.7375	0.702908	0.562759	-0.584625	-0.647324	1.1838	-2.38354	-1.8948	1.01231	2.70325	0.0407295	-1.23175	-1.56	0.324688	2.37751	1.0532	0.0376167	0.544518		10	7.70787	0.54736	1.53732	-0.854362	0.299911	0.219582	-0.105984	0.0546875	1.17986	1.89231	3.50347	0.0158501	1.58701	-0.455273	0.0997925	1.36012	-1.76765	0.272945	1.4989	-0.671154	2.37798	-1.09811
	10	7.73859	0.158784	-0.741165	0.376446	1.5552	1.10291	0.424168	-0.572037	-0.685532	0.977406	-2.49717	-1.66115	1.05349	2.54301	0.0306091	-1.16917	-1.7387	0.505245	2.33374	0.753014	0.0689926	0.516396		10	7.73859	0.567912	1.51383	-0.663666	0.0629463	0.392952	-0.00672913	-0.17168	1.43153	1.96088	3.20989	0.0361252	1.43251	-0.21101	0.214973	1.36799	-1.49178	0.226025	1.23132	-0.715931	2.58128	-1.04321
	10	7.76931	0.138283	-0.690609	0.331074	1.81926	0.995377	0.375317	-0.834118	-0.712357	0.967758	-2.56884	-1.314	0.961765	2.35806	0.17664	-1.1629	-1.71025	0.267159	2.50877	0.589699	-0.104061	0.511913		10	7.76931	0.543614	1.52644	-0.668301	-0.179611	0.353741	-0.0826874	-0.168011	1.43814	2.05589	3.1781	-0.097065	1.53827	-0.385509	0.322357	1.26884	-1.37452	-0.112862	1.3482	-0.747829	2.43664	-0.777958
	10	7.80003	0.119165	-0.779228	0.415211	1.686	1.11663	0.239414	-0.898849	-0.757973	0.834614	-2.46958	-1.40993	0.81422	2.26374	0.398621	-1.03844	-1.8663	0.407906	2.82636	0.705132	-0.135555	0.0313225		10	7.80003	0.584082	1.46917	-0.528603	-0.234386	0.348892	0.0195465	-0.0718422	1.2119	2.14474	3.17217	-0.120899	1.67067	-0.414001	0.220482	1.23629	-1.03701	-0.15152	1.39765	-0.773842	2.97934	-0.857113
	10	7.83075	0.134392	-0.490742	0.508816	1.89798	1.14123	0.483284	-0.694454	-0.782532	0.671799	-2.44777	-1.40361	0.882942	2.3381	0.395424	-0.889118	-1.97012	-0.0323563	3.02971	0.60677	-0.176579	-0.380928		10	7.83075	0.578999	1.38477	-0.617016	-0.435802	0.613258	0.119148	-0.203377	0.937847	1.74001	2.95287	-0.25267	1.9464	-0.706921	0.340118	1.29123	-0.694809	-0.0963974	1.29329	-0.647694	3.3881	-0.772377
	10	7.86147	0.144305	-0.861217	0.510723	1.95685	1.41622	0.302357	-0.728222	-0.450451	0.693745	-2.43688	-1.28197	0.955158	1.98925	0.385414	-0.789314	-2.11302	-0.0356941	2.9997	0.373871	-0.20422	0.203796		10	7.86147	0.53843	1.36243	-0.46841	-0.468647	0.683105	0.180038	-0.449177	0.949764	1.98756	2.64922	-0.63419	1.76175	-0.583088	0.166252	0.836388	-0.512493	-0.123234	1.21997	-0.717087	3.50895	-0.580498
	10	7.89219	0.0571913	-0.824802	0.71302	1.77951	1.35529	-0.23917	-0.672623	-0.701637	0.762207	-3.07403	-1.2535	1.07305	1.75385	0.540443	-0.797447	-2.24777	-0.156441	2.9172	0.414913	-0.477306	0.279064		10	7.89219	0.496937	1.13327	-0.467838	-0.543568	0.705994	0.102055	-0.550228	0.913742	2.0793	2.53242	-0.604183	1.49188	-0.517704	0.250511	0.690872	-0.30088	-0.0394859	0.910583	-0.782688	3.72783	-0.793144
	10	7.92291	0.104646	-0.911541	0.58115	1.52954	1.32595	-0.397209	-0.512428	-0.480286	0.579197	-2.57995	-0.964539	1.03424	1.85953	0.427349	-0.809891	-2.07512	0.00318146	3.05696	0.276276	-0.438839	0.589352		10	7.92291	0.516156	0.956287	-0.383389	-0.478947	0.849533	0.261341	-0.92445	0.752022	2.00609	2.27324	-0.55304	1.52945	-0.714661	0.243454	0.830238	0.0857239	-0.0308304	1.00418	-0.909573	4.13088	-0.604439
	10	7.95363	0.0863991	-0.976078	0.43499	1.39082	1.37363	-0.277237	-0.69339	-0.634727	0.345356	-2.0852	-0.842285	1.00758	1.69573	0.311726	-0.848515	-2.13059	0.24366	3.02861	0.382584	-0.562031	0.563354		10	7.95363	0.555017	0.763176	-0.0116959	-0.947235	0.928631	0.378902	-0.62339	0.91378	1.81478	2.2585	-0.563618	1.431	-0.804722	0.210983	0.875061	0.67841	-0.00629044	1.03489	-1.23415	4.38857	-0.385246
	10	7.98435	0.0942007	-1.06318	0.357895	1.10448	1.56286	-0.0612297	-0.629532	-0.880177	0.613384	-2.0076	-0.657692	0.730442	1.42616	0.484699	-0.829227	-2.1244	0.251957	3.0491	0.396294	-0.345547	0.505333		10	7.98435	0.551576	0.830452	0.186417	-0.736805	0.895977	0.634666	-0.777908	0.724438	1.76421	2.10827	-0.91391	1.59539	-0.724628	0.175789	0.834793	0.660065	0.137001	1.40554	-1.31709	4.18992	-0.641083
	10	8.01507	0.0774067	-0.850395	0.515873	1.11444	1.49091	-0.504936	-0.411999	-0.476509	0.518673	-2.2363	-0.62603	0.612267	0.992092	0.497658	-0.551407	-2.00043	0.0574799	3.25238	0.212379	-0.271542	0.213524		10	8.01507	0.493638	0.779678	0.189419	-0.728596	0.974167	0.542805	-0.734264	0.12421	1.46473	1.82517	-0.972443	1.55434	-0.633846	0.0200806	0.933632	1.15305	0.0994873	1.11049	-1.32282	4.18511	-0.691628
	10	8.04579	0.024144	-1.12539	0.306126	1.31261	1.41023	-0.636509	-0.469635	-0.218327	0.335438	-2.32221	-0.392666	0.332436	1.06846	0.200043	-0.52565	-1.90216	-0.141418	3.30668	0.0447235	-0.368961	0.269058		10	8.04579	0.465778	0.613918	0.176991	-0.507317	0.929344	0.790485	-1.08848	0.328732	1.6946	1.58194	-0.995213	1.47857	-0.858341	-0.243412	0.655312	1.37561	-0.039341	1.31381	-1.24764	4.14505	-0.789043
	10	8.07651	-0.0591444	-1.21181	-0.11129	1.02325	1.45843	-0.661171	-0.788258	-0.351376	0.152889	-2.16906	-0.369923	0.328682	1.053	0.0516815	-0.529713	-1.93744	0.12619	2.95271	0.167786	-0.660213	0.292747		10	8.07651	0.513123	0.710846	0.483883	-0.393555	1.02835	0.629436	-1.13948	0.733616	1.45776	1.49997	-0.882359	1.70633	-0.71114	-0.321968	0.532906	1.51265	0.288792	0.969963	-1.21719	3.92828	-0.554642
	10	8.10723	0.0124218	-1.11186	0.218803	0.966259	1.74826	-0.690594	-0.627277	0.078598	0.0690613	-2.43177	-0.082016	0.420689	1.35412	0.237175	-0.790874	-1.96083	0.239441	2.51981	0.15646	-0.462524	0.397495		10	8.10723	0.463786	0.660408	0.522755	-0.034687	0.959278	0.589382	-1.49736	0.380875	1.49215	1.22622	-0.720661	1.64707	-1.02036	-0.344414	0.486214	1.7969	0.453693	0.916821	-1.22596	3.81359	-0.826199
	10	8.13795	-0.0395731	-1.24332	0.328773	0.72916	1.66565	-0.990429	-0.886284	0.0840836	0.182476	-2.2907	0.0653114	0.417614	1.22688	0.494442	-0.620205	-1.9454	0.127621	2.29095	-0.133293	-0.55267	0.257877		10	8.13795	0.455567	0.824821	0.408375	-0.0679626	0.973774	0.656265	-1.27855	0.199604	1.51653	1.15218	-0.701946	1.57928	-1.09449	-0.514206	0.466068	1.70565	0.592045	0.709991	-1.20332	3.73349	-0.546265
	10	8.16867	-0.0409037	-1.13918	0.231689	0.712914	1.80346	-1.22913	-0.819981	0.121647	0.205128	-2.29639	0.0352631	0.240192	1.11776	0.643581	-0.737637	-1.72857	0.273319	2.27243	-0.24926	-0.559074	0.283772		10	8.16867	0.424906	0.60326	0.216408	0.0997314	1.03434	0.744289	-1.87647	0.225307	1.45558	1.31248	-0.689789	1.61726	-0.900436	-0.578888	0.355225	1.82692	0.690384	0.693287	-1.08797	3.31637	-0.559162
	10	8.19939	-0.0875462	-1.34282	0.341637	0.539665	1.76646	-1.37963	-0.808823	0.0181274	0.193363	-2.18585	0.0832176	0.0483017	1.05016	0.669727	-0.557655	-1.70218	0.104019	2.32666	-0.249035	-0.785858	0.119587		10	8.19939	0.364949	0.599052	0.508797	-0.0813217	0.912022	0.812477	-1.89067	0.182739	1.02681	1.13771	-0.700695	1.69312	-0.99181	-0.514828	0.280647	1.82134	0.665123	0.634605	-1.07367	3.19143	-0.913891
	10	8.23011	-0.100583	-1.03064	0.365658	0.243191	1.58925	-1.43583	-0.785229	0.226562	0.115044	-2.15215	0.283478	0.00559998	1.15011	0.920387	-0.673111	-1.78611	0.0269737	2.07128	-0.380295	-0.849167	0.0833473		10	8.23011	0.338159	0.612713	0.534546	-0.0349007	0.890079	0.961147	-1.86015	0.136806	1.03238	1.09422	-0.821548	1.35753	-1.11835	-0.679909	0.157684	1.73384	0.842163	0.704319	-1.18378	3.34549	-0.941116
	10	8.26083	-0.114011	-1.01719	0.191242	0.220325	1.46437	-1.66119	-0.741859	0.26516	0.252598	-1.99925	0.312241	0.0895348	1.23351	0.815601	-0.90229	-1.74713	-0.143543	2.0497	-0.197105	-0.76638	0.00144958		10	8.26083	0.325374	0.662579	0.3559	0.0793953	0.803127	0.761471	-1.76597	-0.0401726	0.823475	1.05117	-0.637119	1.57728	-1.28598	-0.36554	0.255531	1.59889	1.0008	0.630848	-1.37518	2.9628	-0.585815
	10	8.29155	-0.143435	-1.00538	0.420696	-0.00370026	1.50106	-1.818	-0.83815	0.158447	0.0502281	-1.86545	0.645287	-0.101032	1.30082	1.19346	-1.08067	-1.64433	-0.067215	1.92657	-0.55093	-0.973907	-0.116486		10	8.29155	0.364775	0.806499	0.120029	0.356842	0.972675	0.86721	-2.17789	0.102139	0.917305	1.28937	-0.522991	1.14987	-1.26453	0.0794296	0.162273	1.6249	0.825386	0.809135	-1.10694	2.91977	-0.634987
	10	8.32227	-0.174289	-0.943115	0.415417	0.15226	1.32039	-1.90638	-0.755093	0.311668	0.0791626	-1.59893	0.315521	-0.102451	0.978184	1.25974	-0.958412	-1.81236	-0.252213	1.79515	-0.783165	-0.812229	-0.188927		10	8.32227	0.315529	0.82972	0.321468	0.305496	0.838772	0.870808	-2.33749	0.013607	0.674297	1.27929	-0.853519	1.23574	-1.51115	0.228531	-0.0629349	1.71783	1.09286	0.56992	-1.08473	2.61219	-0.430115
	10	8.35299	-0.201354	-0.999493	0.536163	0.191158	1.07808	-1.61541	-1.07282	0.291473	-0.190552	-1.54052	0.551891	-0.4426	1.05797	1.49798	-1.04163	-1.84708	-0.314716	1.61375	-0.743595	-0.879723	-0.15741		10	8.35299	0.30988	1.18667	0.0795326	0.0983047	0.791588	0.935764	-2.09063	-0.170826	0.563229	1.32929	-1.02873	1.32174	-1.73984	0.367393	-0.27203	1.5359	1.04142	0.732594	-1.03012	2.69806	-0.151703
	10	8.38371	-0.197463	-0.838058	0.343914	0.0490837	0.82357	-1.87436	-1.1137	0.234142	-0.150219	-1.01757	0.510693	-0.569752	0.993107	1.38784	-1.07732	-1.65623	-0.28973	1.8954	-0.618687	-0.919071	-0.0623169		10	8.38371	0.285526	0.921513	0.456974	-0.138939	0.717567	1.0775	-2.34397	-0.100014	0.580799	0.893795	-1.05302	1.5835	-1.59746	0.377239	-0.413792	1.31031	1.00544	1.06219	-1.10145	2.63541	-0.163086
	10	8.41443	-0.238744	-0.791973	0.610001	0.111622	0.786911	-2.00504	-1.2529	0.401264	0.0358658	-1.45172	0.202545	-0.526062	0.826168	1.95397	-1.00652	-1.75198	-0.198902	1.52232	-1.15503	-0.794872	-0.290531		10	8.41443	0.28252	1.14484	0.322647	-0.0132065	0.723377	0.964581	-2.16611	-0.0616379	0.553513	1.33754	-1.05901	1.39696	-1.73853	0.843323	-0.241821	1.04604	0.608521	0.85302	-1.21561	2.47083	-0.118858
	10	8.44515	-0.27818	-0.775459	0.592739	0.0762672	0.815117	-2.30557	-1.31458	0.127403	-0.00733566	-1.31176	0.503071	-0.421516	0.466034	1.74615	-1.02782	-1.3872	-0.232655	1.38344	-1.15327	-0.785198	-0.551468		10	8.44515	0.336297	1.09012	0.401127	0.244652	0.960552	1.00443	-2.43752	0.20372	0.382401	1.85552	-1.14029	1.27045	-1.76831	1.21475	-0.381241	1.21813	0.873714	0.846272	-1.22137	2.26173	-0.152897
	10	8.47587	-0.359045	-0.868183	0.689861	0.140507	0.755249	-2.20414	-1.47395	0.346931	-0.212368	-1.03454	0.465996	-0.62162	0.332672	1.61383	-0.885719	-1.74676	-0.419693	1.2466	-1.40849	-1.19072	-0.70636		10	8.47587	0.308011	1.11027	0.617096	0.156261	0.832222	0.980801	-2.40334	0.0878983	0.0294456	1.96897	-1.31729	1.13411	-1.69619	1.63363	-0.543518	0.920372	0.981304	0.634247	-1.1204	2.37611	-0.22176
	10	8.50659	-0.2948	-0.499302	0.934963	-0.138538	0.701012	-1.95512	-1.43224	0.266113	-0.200089	-1.03254	0.443371	-0.620476	0.288948	1.53707	-0.756351	-1.60802	-0.262981	1.44322	-1.44394	-1.0188	-0.542301		10	8.50659	0.282656	0.943256	0.673473	-0.0805817	0.844429	1.09776	-2.55647	0.0973167	0.157608	1.95149	-1.30127	1.13599	-1.6783	1.77372	-0.679844	0.679127	0.662548	0.593891	-0.975212	2.33565	-0.0214539
	10	8.53731	-0.361902	-0.504711	0.972706	-0.355988	0.686226	-2.44984	-1.59571	0.287525	-0.142223	-0.993828	0.344086	-0.748554	0.0225639	1.80965	-0.964218	-1.51582	-0.424755	1.47392	-1.73748	-1.06769	-0.333908		10	8.53731	0.305399	0.949955	0.554867	-0.421188	0.943222	1.15217	-2.44424	0.109688	0.113571	2.0552	-1.25095	0.933281	-1.96779	2.15348	-0.62429	0.697666	0.697308	0.727348	-0.896999	2.48739	0.138298
	10	8.56804	-0.376043	-0.692909	1.02114	-0.620815	0.846863	-2.37008	-1.43184	0.201042	-0.110752	-0.739338	0.373146	-0.740044	-0.0258446	1.57256	-0.958878	-1.72775	-0.54282	1.43993	-1.4654	-1.21833	-0.330753		10	8.56804	0.285656	0.852886	0.686115	-0.273415	1.11498	1.09455	-2.41206	0.355022	0.113941	2.29464	-1.46915	0.892559	-2.05837	2.38728	-0.939041	0.577263	0.804852	0.828617	-1.19329	1.97377	0.0819931
	10	8.59875	-0.41625	-0.377579	1.15459	-0.3964	0.557339	-2.41829	-1.50632	0.0838089	-0.26017	-0.943901	0.23378	-1.12786	0.118359	1.57792	-0.880547	-1.7426	-0.717319	1.56665	-1.54267	-1.21357	-0.490242		10	8.59875	0.276664	0.929752	0.949394	-0.370178	1.21176	0.982651	-2.13771	0.119774	-0.0776672	2.18873	-1.28369	0.806309	-2.25769	2.58888	-1.00562	0.595081	0.797005	0.865593	-1.19755	1.67532	0.15313
	10	8.62947	-0.408666	-0.231739	0.78244	-0.333431	0.478493	-2.33194	-1.5907	0.153938	-0.208965	-1.13627	0.480946	-1.13343	0.119934	1.69741	-1.0496	-1.75896	-0.666607	1.27908	-1.32856	-1.09478	-0.300602		10	8.62947	0.340105	0.805679	1.12327	-0.578686	1.44521	1.18581	-2.07577	0.426144	0.0556946	2.42095	-1.23604	0.904716	-1.99633	2.77608	-1.10661	0.308804	0.771255	1.02528	-1.08352	1.69487	-0.0647049
	10	8.6602	-0.511634	-0.34861	0.735733	-0.797527	0.328186	-2.51144	-1.676	0.0542068	-0.424774	-1.21412	0.150536	-1.23542	-0.217152	2.06462	-0.897701	-1.75148	-0.597458	1.2066	-1.17165	-1.36229	-0.56694		10	8.6602	0.271262	0.569843	0.994415	-0.756737	1.32058	1.0194	-1.88325	0.39127	-0.191162	2.24901	-1.1468	0.815796	-1.98003	2.93795	-1.11081	0.116947	0.517826	0.816219	-1.24585	1.69032	0.300304
	10	8.69092	-0.496213	-0.269535	0.692707	-0.715736	0.551918	-2.39788	-1.72287	0.109703	-0.287731	-1.11863	-0.079277	-1.06844	-0.254242	1.96508	-0.945824	-1.73622	-0.81282	1.02486	-0.874271	-1.34584	-0.639194		10	8.69092	0.274828	0.665108	1.07939	-0.640068	1.51465	0.687691	-2.033	0.383976	0.116516	2.14151	-1.29132	0.678802	-1.91446	2.85517	-1.20274	-0.0156288	0.650951	1.0171	-1.04218	1.68833	0.156761
	10	8.72163	-0.583182	-0.36499	0.242088	-0.746792	0.23172	-2.39653	-1.81073	-0.0973396	-0.273426	-1.18691	-0.141731	-1.53062	-0.312534	2.02597	-0.784485	-1.89986	-0.705471	0.946896	-0.702576	-1.43853	-0.717789		10	8.72163	0.330717	0.752632	1.16939	-0.613735	1.51888	0.707146	-1.69535	0.369804	-0.0631218	1.94621	-0.798443	0.712051	-1.70953	2.81349	-1.23545	0.151264	0.432274	0.987568	-1.06481	1.93944	0.29464
	10	8.75236	-0.580336	-0.188404	0.329468	-0.699253	0.155499	-2.15935	-1.8195	-0.104984	-0.255711	-1.35005	-0.0615501	-1.29287	-0.499748	1.87255	-0.89267	-1.89045	-0.65564	0.813511	-0.709621	-1.43593	-0.762016		10	8.75236	0.287088	0.53923	1.10248	-0.424278	1.37381	0.949261	-1.9955	0.581482	-0.156712	1.79323	-0.696297	0.836803	-1.73688	2.62685	-1.33875	-0.00819778	0.356178	0.994114	-1.16206	2.04047	0.0665131
	10	8.78308	-0.635138	-0.0676918	0.19775	-0.897736	0.0844269	-2.32067	-1.83337	-0.128063	-0.343735	-1.52087	-0.476124	-1.11026	-0.504318	1.74808	-0.603455	-1.92585	-0.96468	0.925377	-0.377018	-1.5476	-1.03696		10	8.78308	0.312699	0.566887	1.04435	-0.628063	1.45823	0.838299	-1.65238	1.04961	-0.109028	1.50851	-0.374767	0.468304	-1.83641	2.56833	-1.16328	0.267868	0.19035	1.26223	-1.27294	2.02057	0.0473022
	10	8.8138	-0.666028	0.145012	0.0167427	-0.720505	0.001194	-2.39657	-1.93853	-0.207916	-0.585205	-1.16496	-0.588432	-1.53146	-0.813858	2.09568	-0.621613	-2.2104	-0.888363	0.659229	-0.192741	-1.52015	-0.857704		10	8.8138	0.261481	0.171272	0.911533	-0.821293	1.24041	0.590073	-1.70236	0.970413	-0.215363	1.45421	-0.0728645	0.288979	-1.60194	2.57608	-1.12248	-0.0673027	0.33955	1.40511	-1.28446	2.24401	-0.0739555
	10	8.84452	-0.641986	0.0653725	-0.0921173	-0.762241	-0.029274	-2.30645	-1.97636	-0.250595	-0.540798	-1.44574	-0.255562	-1.59716	-0.92852	2.15557	-0.705608	-2.03236	-0.793732	0.795033	0.143738	-1.50912	-0.773808		10	8.84452	0.299706	0.167751	0.933086	-0.524494	1.24068	0.486275	-1.49618	1.19165	-0.290405	1.52258	0.463196	0.423756	-1.35413	2.22195	-1.31248	-0.0667915	0.172764	1.07409	-1.07738	1.96402	0.254169
	10	8.87524	-0.638652	0.193745	-0.169868	-0.93327	-0.0710945	-2.29515	-2.01411	-0.222954	-0.229866	-1.47401	-0.461712	-1.88827	-0.904419	2.24863	-0.639328	-1.9702	-0.917534	0.608543	0.385017	-1.2826	-0.734596		10	8.87524	0.346719	-0.00383759	1.05654	-0.649376	1.23528	0.786968	-1.57816	1.40169	-0.297424	1.59636	0.534554	0.411072	-1.25056	2.19141	-1.31017	-0.0205231	0.114674	1.17887	-0.966141	2.25939	0.243774
	10	8.90596	-0.631272	0.366062	-0.547165	-0.911327	-0.00871277	-2.09993	-2.18557	-0.507481	-0.228683	-1.35014	-0.726059	-1.80848	-0.960724	2.21569	-0.57785	-1.79721	-0.767757	0.606468	0.646133	-1.31659	-0.666122		10	8.90596	0.364437	-0.0859489	1.08161	-0.72509	1.28361	0.393353	-1.47938	1.39735	-0.21777	1.38927	0.52269	0.622486	-1.14584	2.57373	-1.42468	0.0354881	0.165897	1.26732	-0.938412	2.22411	0.348953
	10	8.93668	-0.629362	0.379974	-0.238674	-0.778561	-0.0672684	-2.04295	-2.07893	-0.704044	-0.605091	-1.03912	-0.795044	-1.71187	-1.14148	2.41868	-0.187405	-2.0511	-1.06953	0.39394	0.720963	-1.17046	-0.819283		10	8.93668	0.342059	-0.220238	0.946327	-0.744736	1.23353	0.648754	-1.34862	1.41818	-0.427029	1.35818	0.606518	0.512089	-0.743423	2.45539	-1.32051	-0.036129	0.169903	1.17679	-1.12529	2.18362	0.0978737
	10	8.9674	-0.611176	0.518089	-0.581863	-0.733974	-0.110935	-2.11449	-2.25011	-0.593861	-0.396938	-0.830452	-0.621929	-1.70471	-1.20489	2.32853	-0.27364	-1.78666	-0.877003	0.511124	0.543446	-1.2494	-0.793858		10	8.9674	0.274808	-0.407063	0.700256	-0.650238	1.07452	0.840126	-1.10744	1.46888	-0.73167	0.97662	0.789017	0.341774	-0.811745	2.22563	-1.33199	-0.0270576	0.189667	1.20823	-1.20943	2.17884	-0.22076
	10	8.99812	-0.536047	0.787216	-0.441959	-0.633141	0.00510406	-2.25724	-2.38695	-0.398247	-0.475925	-0.883987	-0.84634	-1.6091	-1.0984	2.62514	-0.348003	-1.79892	-0.862587	0.744907	0.823181	-0.992565	-0.673122		10	8.99812	0.288231	-0.44442	0.708378	-0.608719	0.938454	0.813358	-1.12217	1.49183	-0.579582	1.06007	1.03577	0.145699	-0.381004	2.10503	-1.46009	-0.265499	0.128765	0.996883	-0.790497	2.34818	-0.355812
	10	9.02884	-0.524647	0.794239	-0.678867	-0.531773	-0.0433426	-2.12664	-2.18994	-0.355633	-0.472576	-0.771904	-1.09183	-1.55058	-1.07376	2.2023	-0.389511	-1.94192	-1.03569	0.97678	1.13806	-0.846321	-0.504044		10	9.02884	0.270486	-0.392399	0.860569	-0.467442	0.97649	0.903259	-0.970146	1.37336	-0.654339	0.988064	0.968571	0.219631	-0.0868912	1.80827	-1.80699	-0.260555	0.193687	1.17835	-1.12239	1.96869	-0.268063
	10	9.05956	-0.568405	0.908802	-0.633904	-0.479122	-0.00634003	-2.13408	-2.43796	-0.274292	-0.524933	-0.72942	-1.25102	-1.79297	-1.00948	2.26022	-0.321133	-2.02316	-1.08443	0.664738	0.864143	-0.68713	-0.676628		10	9.05956	0.275836	-0.430607	0.690311	-0.297447	0.993004	1.04305	-0.934429	1.45164	-0.94175	1.23327	1.1632	0.124599	-0.138046	1.42735	-1.6111	-0.38203	0.0343285	1.3951	-0.984474	2.19202	-0.511272
	10	9.09028	-0.507275	0.881081	-0.635262	-0.38274	0.393475	-2.10801	-2.64839	-0.320133	-0.223629	-0.393692	-1.21266	-1.50599	-1.50537	2.17152	-0.1422	-1.81995	-1.06911	0.841228	1.07178	-0.658909	-0.878555		10	9.09028	0.300461	-0.309181	0.76717	-0.257465	1.20861	1.01522	-0.722698	1.58145	-0.647877	1.09371	1.17336	0.217594	0.00798416	1.34597	-1.66604	-0.282749	-0.0387154	1.33648	-0.793549	1.79624	-0.816296
	10	9.121	-0.527509	0.785259	-0.422768	-0.320869	0.508621	-2.15358	-2.68576	-0.312729	-0.33812	-0.449589	-1.24067	-1.26426	-1.4314	2.20963	-0.199646	-2.21436	-1.09757	0.783127	0.840515	-0.525467	-1.02055		10	9.121	0.300117	-0.422668	0.43306	-0.406048	1.09578	1.17075	-0.894768	1.59966	-0.655735	0.85709	1.41349	0.0624809	0.384678	1.21822	-1.4728	-0.202675	-0.105564	1.49701	-0.725491	1.78128	-0.625404
	10	9.15172	-0.437944	0.927921	-0.510853	-0.2006	0.46209	-1.90652	-2.45862	-0.24255	-0.18161	-0.426212	-1.21389	-1.16226	-1.32575	2.01529	-0.17572	-2.20804	-1.06556	0.994659	0.808472	-0.235374	-0.653763		10	9.15172	0.318638	-0.376045	0.406372	-0.233551	1.00296	1.31628	-0.729916	1.60485	-0.313377	0.954437	1.11514	0.225605	0.599995	1.00849	-1.80529	-0.229809	0.0821304	1.40671	-0.645538	1.60754	-0.624203
	10	9.18244	-0.473081	0.952953	-0.583794	-0.0258751	0.501526	-2.3094	-2.47848	-0.284641	-0.405903	-0.452232	-1.2562	-1.04313	-1.27305	2.01301	-0.354282	-2.34856	-1.10619	1.01064	0.81691	-0.133785	-0.701111		10	9.18244	0.322083	-0.319817	0.308819	-0.0754814	0.994148	1.3546	-0.719101	1.57578	-0.689507	0.871883	1.22522	0.376835	0.679897	0.875534	-1.60817	-0.270115	-0.0111847	1.68694	-0.660187	1.52035	-0.67477
	10	9.21316	-0.357799	1.04041	-0.528389	0.153393	0.913002	-2.23072	-2.59501	-0.121826	-0.0327988	-0.516239	-1.19529	-0.90387	-1.18019	1.96299	-0.313671	-2.30844	-1.28781	1.09263	1.33046	0.115032	-0.549644		10	9.21316	0.293402	-0.242306	0.270687	-0.110527	1.0848	1.29996	-0.77879	1.64836	-0.636162	0.920258	1.17472	0.250317	0.826214	0.71228	-1.911	-0.309811	0.152641	1.78392	-0.648102	1.36134	-0.980766
	10	9.24388	-0.344795	0.903984	-0.66283	-0.0469475	0.729206	-2.328	-2.7625	0.149185	-0.0984383	-0.53754	-1.15099	-0.726883	-1.22948	2.03938	-0.166042	-2.15084	-0.94791	1.2023	1.40623	0.160915	-0.678703		10	9.24388	0.330949	-0.15107	0.272167	0.125851	1.10093	1.72223	-0.63525	1.4499	-0.435921	0.845707	1.16997	-0.0155678	0.74474	0.594978	-1.62571	0.0358162	-0.120014	1.80792	-0.784584	1.61833	-1.10143
	10	9.2746	-0.299397	0.815815	-0.65897	-0.0569878	0.776459	-2.22062	-2.72902	-0.128826	0.420792	-0.449802	-0.988533	-0.493435	-1.14748	1.98751	-0.476761	-2.31893	-1.17856	1.29882	1.4253	0.551994	-0.416714		10	9.2746	0.332751	-0.178585	0.07621	0.124958	1.16439	1.90209	-0.571545	1.35524	-0.470444	0.876572	1.1772	-0.0210762	0.812149	0.460617	-1.89282	-0.090992	0.166683	1.89183	-0.548931	1.57196	-1.15046
	10	9.30532	-0.278303	0.889393	-0.504105	-0.10696	0.876667	-2.33382	-2.51756	-0.0525894	0.209789	-0.46529	-1.12232	-0.32951	-0.877094	1.87977	-0.488728	-2.38213	-1.14766	1.29456	1.46972	0.244267	-0.102455		10	9.30532	0.270546	-0.380669	-0.0305557	0.026371	0.922886	2.02518	-0.866528	1.37885	-0.459137	0.737644	1.04506	0.00275803	0.971436	0.152199	-1.64451	-0.381824	0.327877	2.04332	-0.483486	1.60727	-1.58322
	10	9.33604	-0.22005	0.691746	-0.522942	0.0418968	1.03544	-2.43252	-2.3438	0.0445786	0.33987	-0.559895	-1.06664	-0.0197792	-0.823204	2.05818	-0.555546	-2.58661	-1.11603	1.29697	1.64562	0.403484	0.0681686		10	9.33604	0.283468	-0.30732	0.0144463	-0.123726	1.03383	1.78682	-0.763363	1.26493	-0.409996	0.895535	0.910263	-0.0824928	1.00071	0.161568	-1.61611	-0.716457	0.710327	2.34168	-0.251396	1.47475	-1.65465
	10	9.36676	-0.210942	0.830059	-0.712891	-0.0486641	1.07995	-2.34436	-2.43573	-0.0470009	0.301186	-0.780296	-1.07106	0.113392	-0.804417	2.08796	-0.450642	-2.68062	-1.08027	1.36897	1.84787	0.630299	-0.0225754		10	9.36676	0.279967	-0.461777	-0.10281	-0.153339	1.06491	1.95628	-0.587746	1.25298	-0.422333	0.856354	0.609653	0.265289	0.66378	0.120384	-1.35557	-0.676689	0.610847	2.41193	-0.157043	1.60715	-1.90292
	10	9.39748	-0.138034	1.07918	-0.526875	-0.103733	1.17759	-2.38011	-2.00972	-0.338047	0.527447	-0.83287	-1.1692	0.0875206	-0.564018	2.04655	-0.447044	-2.61443	-1.08076	1.52693	1.83111	0.703732	0.32608		10	9.39748	0.277443	-0.540375	-0.320225	-0.260864	1.12765	2.18652	-0.59021	1.3819	-0.244663	0.850296	0.617676	0.0547562	0.847614	0.3218	-1.54477	-0.452969	0.635223	2.40369	-0.273544	1.27122	-1.92188
	10	9.4282	-0.163606	0.779675	-0.527401	-0.0160255	0.99231	-2.54547	-2.25569	-0.44976	0.663479	-0.720024	-0.874783	0.105881	-0.546768	1.92209	-0.549942	-2.53776	-0.93676	1.18835	1.8308	1.0321	0.173565		10	9.4282	0.294219	-0.406536	-0.486401	-0.451611	1.2606	2.16963	-0.526615	1.74229	-0.524414	0.717865	0.69191	0.28286	0.913357	0.0364685	-1.49051	-0.503429	0.762363	2.64667	-0.383137	1.38346	-1.95046
	10	9.45892	-0.0986277	1.11706	-0.345081	0.149055	1.07716	-2.45028	-2.0533	-0.434486	0.401871	-0.602501	-0.333633	0.181255	-0.600304	1.64164	-0.457794	-2.66864	-0.965775	1.31034	1.7465	1.13999	0.174362		10	9.45892	0.25526	-0.386192	-0.374523	-0.550472	1.55148	2.28846	-0.337845	1.44934	-0.477741	0.783875	0.224178	0.234818	0.750462	-0.293694	-1.76295	-0.848122	1.0613	2.55378	-0.18129	1.2144	-1.79406
	10	9.48964	-0.13093	0.941486	-0.508385	0.34351	1.14317	-2.42785	-1.84307	-0.285141	0.139179	-0.711624	-0.4249	0.42963	-0.508133	1.503	-0.552353	-2.61128	-0.951305	1.19304	1.43191	0.829426	0.251083		10	9.48964	0.270308	-0.588585	-0.273636	-0.528095	1.43458	2.36458	0.0170021	1.25088	-0.426052	0.854218	0.156898	0.509403	0.495449	-0.47506	-1.7333	-0.727745	1.19455	2.68829	-0.0704117	1.07742	-1.81422
	10	9.52036	-0.0838198	1.14	-0.264339	0.302273	1.34664	-2.57805	-1.73082	-0.33403	-0.027935	-0.863838	-0.406185	0.259548	-0.421326	1.82819	-0.583633	-2.71529	-0.660122	1.09903	1.31377	1.26999	0.349731		10	9.52036	0.302912	-0.613438	-0.309067	-0.472984	1.77913	2.5103	-0.0213432	1.08905	-0.242256	0.915417	0.103111	0.489895	0.610435	-0.410458	-1.74061	-0.827919	1.26698	2.43447	0.308601	0.719349	-1.53042
	10	9.55108	-0.126316	0.804802	-0.270004	0.177975	1.28572	-2.36931	-1.54733	-0.226063	0.226063	-0.948349	-0.226299	-0.223557	-0.630157	1.05864	-0.498955	-2.5456	-0.741917	1.25743	1.40282	1.25817	0.229576		10	9.55108	0.294801	-0.57708	-0.321186	-0.466892	1.9063	2.8515	-0.201698	1.06091	0.00809479	0.661278	0.458508	0.593868	0.401089	-0.558441	-1.49003	-0.990116	1.13689	2.42961	-0.124413	0.715012	-1.59719
	10	9.5818	-0.0601229	0.757248	-0.0236549	0.317459	1.1848	-2.26825	-1.44397	-0.376122	0.0835342	-1.06675	-0.208344	0.096508	-0.359718	1.54011	-0.485474	-2.67941	-0.491585	1.13002	1.41533	1.34138	0.334412		10	9.5818	0.300652	-0.468372	-0.269894	-0.797676	2.12681	3.10003	-0.263649	1.0694	0.15588	0.6619	0.0735474	0.502205	0.216282	-0.452515	-1.31696	-1.00452	1.27519	2.24796	0.0596542	0.609272	-1.51151
	10	9.61252	-0.0427385	0.908443	-0.0793495	0.47929	1.24872	-2.31615	-1.52715	-0.0716133	-0.0491295	-0.992371	-0.185158	0.314686	-0.554134	1.61933	-0.48558	-2.82426	-0.315002	1.38002	1.32197	1.41627	-0.143593		10	9.61252	0.376004	-0.358185	-0.409832	-0.471184	1.96744	3.42144	-0.192757	1.07354	0.145874	0.612675	-0.137455	0.612854	0.476097	-0.290665	-1.39211	-0.940819	1.35899	2.54332	0.195236	0.725201	-1.41959
	10	9.64324	-0.130565	0.82645	-0.541954	0.366692	1.23322	-2.35913	-1.3093	-0.271099	-0.210972	-1.5442	-0.53717	0.231941	-0.216667	1.86415	-0.698082	-2.80629	-0.488892	1.12884	1.21283	1.5979	-0.0895767		10	9.64324	0.359936	-0.409515	-0.534039	-0.865814	2.19679	3.30585	0.257568	1.16793	0.111462	0.585876	-0.091404	0.540234	0.247776	-0.273499	-1.40691	-1.25463	1.45126	2.63589	0.237419	0.598339	-1.30187
	10	9.67396	-0.0806131	0.552841	-0.144547	0.41571	1.1403	-1.81837	-1.29066	-0.0860291	-0.276455	-1.08798	-0.504082	0.318932	-0.621284	1.81089	-0.812141	-2.9053	-0.240116	1.23749	1.17877	1.47883	0.0409393		10	9.67396	0.281049	-0.486622	-0.589542	-0.960148	2.00517	3.48942	-0.0959702	1.20707	-0.014389	0.293957	-0.18454	0.583912	0.151608	-0.436626	-1.35425	-1.22725	1.36004	2.60006	0.201767	0.494331	-1.41702
	10	9.70468	-0.129677	0.489159	-0.218636	0.537201	0.995838	-1.68114	-1.34261	-0.267952	-0.417599	-1.21905	-0.285652	0.175472	-0.562477	1.72437	-0.897141	-2.62705	-0.379101	1.01802	0.95845	1.39917	0.00717926		10	9.70468	0.268439	-0.570877	-0.493362	-1.00144	2.04937	3.54052	0.166111	1.07814	0.197128	0.512466	-0.326534	0.39846	0.0390511	-0.264534	-1.2226	-1.31707	1.11828	2.31572	0.0377579	0.509541	-1.39735
	10	9.7354	-0.103388	0.410362	-0.250454	0.718861	1.14936	-1.59197	-1.25522	-0.269943	-0.409729	-1.22825	-0.391762	0.0544777	-0.485672	1.54334	-0.820225	-2.45247	-0.102001	0.92923	0.97007	1.55812	-0.143883		10	9.7354	0.255371	-0.557686	-0.594788	-0.814831	2.11967	3.36773	0.127056	1.18792	0.218323	0.321007	-0.438385	0.346565	-0.0498772	-0.188644	-1.28676	-1.07573	1.06717	2.31546	-0.16534	0.44376	-1.23521
	10	9.76612	-0.0812666	0.391502	-0.13308	0.572891	1.15712	-1.76785	-1.215	-0.304657	-0.457233	-1.27258	-0.564472	0.0437241	-0.394154	1.75256	-0.712055	-2.30353	-0.00735855	1.00145	1.02014	1.7103	-0.143047		10	9.76612	0.272075	-0.413284	-0.588528	-1.05262	2.26542	3.65823	0.193638	0.984161	0.273445	0.215721	-0.225636	0.388134	-0.387028	-0.0557518	-1.1699	-1.11112	1.20745	2.15757	-0.209423	0.276257	-0.965237
	10	9.79684	-0.0239714	0.480412	0.0303726	0.582462	1.30513	-1.52762	-0.926445	-0.232918	-0.405685	-1.1605	-0.516479	0.27512	-0.409405	1.43005	-1.03758	-2.22824	0.00745773	1.13115	1.09056	1.84876	-0.216026		10	9.79684	0.287271	-0.532223	-0.515976	-0.929985	2.45434	3.42072	0.161739	0.938892	0.47567	-0.0915527	-0.0878029	0.344124	-0.178371	-0.0778542	-1.03949	-1.07633	0.967762	2.52115	-0.0977097	0.00889587	-0.920578
	10	9.82756	-0.117111	0.333664	0.0268021	0.472565	1.23851	-1.44842	-0.551365	-0.442139	-0.526257	-1.26867	-0.687622	0.0170708	-0.55299	1.53384	-1.06374	-2.15838	-0.306015	0.966862	0.722893	1.68792	-0.336769		10	9.82756	0.22339	-0.703892	-0.529888	-0.992058	2.42476	3.32882	0.372665	0.86171	0.328636	-0.116051	-0.392704	0.209583	-0.404144	0.014679	-0.88702	-1.14941	0.818726	2.15996	0.0656891	-0.177891	-0.764355
	10	9.85828	-0.102594	0.321266	-0.0525055	0.700932	1.15958	-1.30919	-0.340378	-0.276535	-0.373417	-1.32983	-0.711193	0.0536423	-0.718658	1.41141	-1.28493	-2.29115	-0.0302124	0.951912	0.574249	1.82003	-0.3269		10	9.85828	0.209117	-0.744473	-0.742855	-0.942696	2.71386	3.09866	0.360317	0.930645	0.693642	-0.076458	-0.484749	0.196671	-0.257328	-0.215637	-0.894661	-1.1619	0.746159	2.13545	-0.0263672	-0.15028	-0.995659
	10	9.889	-0.151534	0.130802	-0.157566	0.523563	1.04599	-1.26448	-0.245941	-0.314445	-0.727932	-1.27634	-0.552647	-0.0557899	-0.611496	1.24992	-1.12461	-2.33474	0.128407	0.773838	0.538597	1.75866	-0.514465		10	9.889	0.168065	-0.770115	-0.436653	-1.21531	2.74998	2.88313	0.243084	1.18729	0.54747	-0.133335	-0.439602	0.400532	-0.499546	-0.228088	-0.815529	-1.13351	0.458569	1.94457	-0.144409	-0.288197	-0.949047
	10	9.91972	-0.0879915	-0.0717659	-0.0480347	0.788349	1.10124	-1.20905	0.105263	-0.139992	-0.661747	-1.21441	-0.542763	0.0144234	-0.413528	1.02633	-1.08262	-2.39082	0.0874367	0.969818	0.720604	1.834	-0.632568		10	9.91972	0.171566	-0.789665	-0.494564	-0.999676	2.73014	3.00373	0.272541	1.10223	0.929619	-0.41293	-0.515083	0.242519	-0.467335	-0.127586	-0.728767	-1.224	0.273426	1.99825	-0.242691	-0.313789	-0.805065
	10	9.95044	-0.102554	-0.159473	0.00575256	0.623302	1.12257	-1.27085	0.415375	-0.50045	-0.774212	-1.29985	-0.425171	-0.217953	-0.602463	1.00748	-0.925835	-2.02174	0.0723801	0.716141	0.778572	1.61341	-0.208073		10	9.95044	0.103271	-0.996098	-0.431255	-0.930012	2.47866	2.51755	0.29884	1.1963	1.07275	-0.43354	-0.616165	0.29203	-0.317322	-0.730453	-0.83522	-0.848114	0.368076	1.91129	-0.323982	-0.817581	-0.79034
	10	9.98116	-0.0464657	-0.0680504	-0.101616	0.748951	1.09192	-0.91415	0.374702	-0.154251	-0.910751	-1.06379	-0.283314	-0.0831528	-0.578331	0.892387	-0.948662	-1.96486	0.0785217	0.497318	0.498089	1.89565	0.0640831		10	9.98116	0.119456	-1.1237	-0.524502	-0.714767	2.62438	2.66349	0.339439	1.14017	1.49044	-0.475193	-1.02873	0.299095	-0.10667	-0.371189	-1.09383	-0.812588	0.196667	1.80421	-0.250393	-0.787312	-0.879883
	10	10.0119	-0.0162399	-0.262909	0.24118	0.471073	1.36176	-0.761372	0.665176	-0.355324	-0.788227	-1.13627	-0.335613	0.0630836	-0.404228	0.76495	-0.940285	-1.99274	0.242004	0.404182	0.492008	1.86111	0.0856361		10	10.0119	0.118106	-0.938629	-0.309162	-1.14108	2.62494	2.46105	0.282757	1.1306	1.30094	-0.614166	-1.00263	0.213074	-0.115574	0.078167	-0.703636	-0.579823	0.1077	1.53514	-0.189739	-0.866467	-0.911339
	10	10.0426	0.0448017	-0.0172424	-0.105312	0.763531	1.39706	-0.460365	1.06523	-0.269516	-0.865284	-1.23942	-0.151054	-0.00725174	-0.347248	0.844475	-0.95013	-2.1293	0.156509	0.632828	0.31485	2.01755	0.246124		10	10.0426	0.115196	-1.18574	-0.451099	-0.695393	2.58771	2.48068	0.359028	0.931957	1.55287	-0.537205	-1.15421	0.239433	0.186871	-0.115738	-0.682076	-0.490376	-0.375347	1.52747	-0.232883	-0.771877	-0.870163
	10	10.0733	-0.00888271	-0.115341	-0.440529	0.718861	1.25175	-0.545101	1.36385	-0.254639	-0.731224	-1.1676	-0.284054	-0.486328	-0.374176	0.742432	-0.879795	-1.95401	0.39085	0.529793	0.496956	1.63141	-0.0707664		10	10.0733	0.0986076	-1.36116	-0.506832	-0.760742	2.47592	2.25285	0.552601	1.05099	1.5767	-0.787678	-1.25946	0.216309	0.172176	-0.0968399	-0.257988	-0.326988	-0.570469	1.61727	-0.282143	-0.752277	-0.980076
	10	10.104	-0.00480347	-0.247688	-0.572701	0.835613	1.14554	-0.515392	1.19522	-0.347	-0.623863	-1.14998	-0.154808	-0.540379	-0.119511	0.69632	-0.915035	-1.73472	0.395508	0.301163	0.547562	1.71265	-0.00457382		10	10.104	0.101725	-1.35429	-0.528946	-0.555988	2.50205	2.22647	0.810795	0.974037	1.75426	-0.904797	-0.918907	-0.126671	0.41964	-0.0965691	-0.506466	-0.296471	-0.68013	1.5374	-0.449829	-0.895473	-0.875614
	10	10.1348	0.0368404	-0.185413	-0.441006	0.864559	1.21885	-0.715126	1.67309	-0.453392	-0.595612	-0.78196	-0.141266	-0.528233	-0.22916	0.680813	-1.05415	-1.67833	0.550934	0.460983	0.659019	1.4708	-0.0385818		10	10.1348	0.0223379	-1.59627	-0.85397	-0.603291	2.30384	1.91723	0.700809	1.05666	1.71413	-1.08268	-1.06496	0.145519	0.5079	-0.296482	-0.41925	-0.0980949	-0.512245	1.23755	-0.635788	-0.928623	-1.04523
	10	10.1655	0.0858822	-0.160816	-0.520042	1.08215	1.03185	-0.56427	1.68198	-0.554604	-0.530895	-0.747864	-0.076786	-0.460697	-0.00550079	0.628742	-0.977524	-1.60218	0.500675	0.53759	0.536259	1.68448	0.235085		10	10.1655	0.0446154	-1.47002	-0.562538	-0.393829	2.14757	1.69705	0.648266	0.816349	2.20233	-1.10533	-1.06309	0.0943909	0.540516	-0.387043	-0.407951	-0.224586	-0.829594	1.38395	-0.541027	-0.8862	-0.766907
	10	10.1962	0.163843	-0.0550804	-0.429993	0.920864	1.23487	-0.47646	2.15926	-0.379425	-0.655598	-0.501007	0.18618	-0.380161	-0.0976257	0.627098	-0.753601	-1.37982	0.389645	0.491875	0.634068	1.43	0.311783		10	10.1962	0.0477417	-1.63729	-0.322071	-0.287735	2.0182	1.62948	0.28183	0.965824	2.28986	-1.28516	-0.913162	0.289417	0.567997	-0.518555	-0.311432	0.0501518	-0.798779	1.16424	-0.453526	-1.11448	-0.659973
	10	10.2269	0.157988	0.00501251	-0.598591	0.892502	1.21783	-0.484051	1.97262	-0.5956	-0.557384	-0.405121	0.252483	-0.576405	0.00364685	0.501881	-0.347702	-1.35693	0.486362	0.657585	0.205692	1.47068	0.41526		10	10.2269	0.0498293	-1.77456	-0.527134	-0.386284	2.00605	1.58404	0.609547	0.80933	2.64156	-1.58135	-1.03423	0.126877	0.669361	-0.532837	-0.359768	0.259094	-0.919418	1.07349	-0.317619	-1.0226	-0.326965
	10	10.2576	0.172944	-0.226971	-0.715988	0.889782	1.40384	-0.483479	2.25014	-0.544556	-0.289646	-0.176113	0.268341	-0.555412	-0.283112	0.421162	-0.558098	-1.37714	0.336658	0.386112	0.522289	1.58599	0.605087		10	10.2576	-0.0434864	-2.0859	-0.581459	-0.316044	1.61005	1.24204	0.415688	0.80674	2.69688	-1.47666	-1.27372	0.368191	0.533714	-0.795406	-0.403755	-0.001297	-1.15531	1.13643	-0.161942	-1.10758	-0.320396
	10	10.2884	0.217801	-0.0676193	-0.737972	1.01556	1.4154	-0.340466	2.28049	-0.375431	-0.132244	0.223503	0.3424	-0.893951	0.0171967	0.544651	-0.839085	-1.23247	0.436459	0.0998192	0.460155	1.48938	0.650234		10	10.2884	-0.0123617	-1.85075	-0.821079	-0.189945	1.49288	1.17234	0.317532	0.715019	2.81841	-1.44489	-0.602917	0.549618	0.501415	-0.799786	-0.321301	0.227226	-1.26836	0.77253	-0.0965576	-1.43483	0.0162048
	10	10.3191	0.292138	-0.140289	-0.729469	0.569889	1.51203	-0.125198	2.49924	-0.373955	0.118073	0.422379	0.469849	-0.575771	0.0563622	0.397594	-0.763504	-0.867413	0.542675	0.222054	0.649555	1.31659	0.642082		10	10.3191	0.0187531	-1.92406	-0.55603	-0.0620804	1.46172	0.942654	0.190514	0.815933	2.91828	-1.46206	-0.531918	0.759876	0.506973	-0.957787	-0.151531	0.279476	-1.11975	0.554459	0.201862	-1.3602	-0.131271
	10	10.3498	0.27557	-0.290638	-0.767845	0.744625	1.15377	-0.112942	2.33641	-0.570686	-0.0559959	0.392815	0.678692	-0.787014	0.260353	0.298565	-0.68869	-0.113342	0.363346	0.314419	0.393696	1.2896	0.672264		10	10.3498	0.00989819	-1.88573	-0.504162	-0.303329	1.29	1.12607	0.148624	0.582188	2.8291	-1.65653	-0.336174	0.843571	0.295399	-1.11114	-0.195152	0.414959	-1.04497	0.584751	0.288433	-1.23896	0.0710182
	10	10.3805	0.266139	-0.303574	-0.99041	0.60751	1.28345	-0.0218048	2.52112	-0.847778	0.247162	0.36245	0.670956	-0.710491	0.118263	0.0657654	-0.624481	-0.360306	0.119896	0.303532	0.566452	1.20614	1.10893		10	10.3805	-0.0589823	-1.9902	-0.413502	-0.371693	1.02085	1.15224	-0.00836563	0.656788	2.65616	-1.71187	-0.473648	0.689091	0.621117	-1.26073	0.0156555	0.0321198	-0.985641	0.581818	0.207497	-1.51292	-0.0844231
	10	10.4112	0.297558	-0.187298	-0.91235	0.884037	1.07821	0.127827	2.5394	-0.693626	0.101727	0.22691	0.538612	-0.834301	0.0939941	0.265999	-0.532787	-0.264095	0.126144	0.351135	0.581463	1.18538	1.27478		10	10.4112	-0.0646452	-1.98675	-0.351322	-0.536572	1.06804	1.28942	0.0064888	0.606419	2.59295	-1.8062	-0.219196	0.791573	0.199139	-1.00359	0.20179	-0.0331993	-1.13871	0.27832	0.284199	-1.44821	-0.0874825
	10	10.442	0.36929	0.0946579	-0.906757	0.884823	1.20116	0.124512	2.42992	-0.662868	0.214226	0.528976	0.619469	-0.490944	0.223564	0.327557	-0.813026	-0.165806	0.219212	0.383011	0.875538	1.23122	1.06736		10	10.442	-0.0416424	-2.08486	-0.239376	-0.432442	1.11058	1.03073	-0.488277	0.594154	2.77646	-1.69339	-0.362114	0.697041	0.300621	-1.05964	0.169167	0.0066185	-1.06742	0.506786	0.650742	-1.21849	-0.0297279
	10	10.4727	0.304405	-0.139072	-0.995083	0.812035	1.01732	0.112507	2.38062	-0.763313	0.24361	0.588726	0.737793	-0.821354	0.482353	0.242584	-1.06297	0.0211029	0.00465775	0.25375	0.819691	1.07682	1.07632		10	10.4727	-0.0787548	-2.00847	-0.203312	-0.418564	0.962723	1.1043	-0.43132	0.394909	2.56021	-1.77605	-0.117748	0.960197	0.370571	-1.17405	0.137478	0.0742722	-1.34339	0.159351	0.554745	-1.47245	0.091507
	10	10.5034	0.365914	-0.0477829	-0.945858	0.882404	1.66822	0.429951	2.32731	-0.902111	0.359669	0.783691	0.577663	-0.695206	0.625141	0.095768	-1.07395	0.0550995	-0.180546	-0.0154724	1.17743	0.951736	1.24512		10	10.5034	-0.149749	-2.05203	-0.256351	-0.430141	0.728199	1.09443	-0.725719	0.401974	2.41548	-2.04461	-0.321861	0.741173	0.305058	-1.60915	0.324646	-0.131546	-1.2825	0.22171	0.763157	-1.24782	0.110928
	10	10.5341	0.404932	0.0554771	-0.914314	1.07286	1.0937	0.472198	2.25452	-0.733192	0.152641	0.675797	0.626896	-0.916103	0.856575	0.256069	-0.833282	0.58934	-0.0141029	-0.0578156	1.05494	0.97855	1.42788		10	10.5341	-0.162727	-2.27929	-0.302055	-0.460312	0.754177	0.991234	-0.930187	0.304726	2.29757	-2.16896	-0.179142	0.873817	0.199818	-1.31688	0.155716	-0.031826	-1.16665	0.0141449	0.96759	-1.24479	0.266747
	10	10.5648	0.38506	0.286896	-0.804085	1.06903	0.893009	0.28989	2.29443	-0.798351	0.151745	0.583027	0.739143	-0.968353	0.649952	0.25259	-0.846378	0.565712	-0.0273857	0.0810547	0.937672	0.850979	1.50063		10	10.5648	-0.18218	-2.09472	-0.0616188	-0.461552	0.591206	1.22261	-1.33262	0.225346	2.16738	-2.15985	-0.267246	1.01283	0.0421906	-1.31654	0.44207	-0.535534	-0.890511	-0.248714	1.21515	-1.20569	0.0122337
	10	10.5956	0.296628	-0.00727463	-0.610226	0.855	0.636017	0.221367	2.09302	-1.0496	-0.0427895	0.72871	0.6521	-1.1687	0.549816	-0.0246925	-0.92234	0.556244	-0.129108	0.250523	0.776253	0.945812	1.62242		10	10.5956	-0.0964886	-1.97921	0.162254	-0.107307	0.428974	1.01234	-0.96347	0.110939	2.09707	-2.21297	0.00756454	1.39403	-0.0965118	-1.22208	0.424641	-0.511143	-0.86525	-0.297222	1.66943	-1.10435	0.12249
	10	10.6263	0.269588	-0.0641747	-0.939651	0.909061	0.542931	0.408802	2.10003	-1.11191	0.270908	0.889954	0.398357	-1.1723	0.554607	0.173981	-1.15268	0.721851	-0.282696	0.0246315	0.863586	0.792988	1.46347		10	10.6263	-0.0615095	-1.97607	0.509178	-0.165009	0.12888	1.20752	-1.1734	0.188747	1.7318	-2.10133	0.0732689	1.41248	0.0325089	-0.990124	0.606544	-0.450489	-0.861862	-0.0431709	1.82109	-1.02015	-0.160599
	10	10.657	0.230811	-0.10788	-0.838989	1.0644	0.323082	0.482307	1.88542	-0.934967	0.15239	0.896008	0.227699	-1.13826	0.610001	0.295563	-1.32748	0.847698	-0.523174	-0.040657	0.614349	0.685112	1.4436		10	10.657	-0.11189	-1.98528	0.638935	-0.364635	0.304424	1.02028	-1.5254	0.180977	1.44218	-2.45807	0.162441	1.51093	-0.357296	-0.681156	0.371891	-0.41729	-0.660793	-0.185722	2.03236	-1.10912	-0.157448
	10	10.6877	0.280679	0.0238457	-0.819607	1.13152	0.430634	0.294125	1.71178	-0.997749	0.440971	0.930817	0.357033	-0.999348	0.835331	0.323315	-1.26304	0.782444	-0.470261	-0.0791855	0.824867	0.678844	1.47725		10	10.6877	-0.0511612	-1.97221	0.980228	-0.506081	0.300301	1.23495	-1.67091	-0.0120239	1.45682	-2.40025	-0.216228	1.80399	-0.383259	-0.14957	0.489918	-0.737614	-0.759476	-0.0879478	2.16619	-0.752113	0.19207
	10	10.7184	0.286287	0.0326691	-0.617508	0.954433	0.647461	0.0551338	1.65467	-0.895126	0.53677	0.680325	0.23465	-1.17569	0.916348	0.387009	-1.23517	0.814487	-0.538712	-0.040123	0.898178	0.930302	1.48563		10	10.7184	-0.00924015	-2.11221	1.4244	-0.449512	0.331104	0.970287	-1.5707	0.251118	1.1585	-2.48225	-0.0318718	2.09713	-0.425293	-0.066658	0.724869	-0.791943	-0.540417	-0.341576	2.20098	-0.733192	0.202419
	10	10.7492	0.265117	-0.166016	-0.702671	0.951069	0.785458	0.054966	1.74422	-0.954159	0.520809	0.606377	0.114868	-1.22466	0.8386	0.379295	-0.899132	0.722527	-0.391247	-0.133141	0.981014	0.566357	1.50781		10	10.7492	0.0254644	-2.05911	1.48625	-0.677406	0.24165	0.80658	-1.48158	0.493374	1.09142	-2.43661	-0.189762	2.09992	-0.399662	0.387531	0.8284	-0.870857	-0.644058	-0.236973	2.20956	-0.173267	0.0338974
	10	10.7799	0.23443	-0.00713348	-0.759953	1.01019	0.711586	0.138653	1.70633	-1.0488	0.489037	0.66695	0.0308037	-1.2877	0.81496	0.0816536	-0.996025	0.785294	-0.495472	-0.13929	0.736256	0.647205	1.60406		10	10.7799	0.02365	-2.17751	1.41139	-0.565754	0.0734444	0.870213	-1.40947	0.196198	1.07864	-2.65701	-0.33366	2.1875	-0.624943	0.856785	0.547894	-0.880131	-0.452473	0.109257	2.3317	-0.172089	0.0830078
	10	10.8106	0.118209	-0.360184	-0.815887	0.886292	0.443565	-0.0344658	1.69872	-1.02955	0.573292	0.628311	-0.278641	-1.27905	0.711853	0.13501	-0.90588	0.702682	-0.49831	-0.460323	0.43932	0.3601	1.44733		10	10.8106	0.0573769	-2.07112	1.92208	-0.646172	-0.180492	1.11703	-1.21625	-0.0867348	0.623665	-2.62834	-0.134796	2.03046	-0.526676	1.26609	0.703342	-1.24446	-0.318794	0.0543251	2.50125	0.237373	-0.25425
	10	10.8413	0.157863	-0.315662	-0.702171	0.935429	0.701294	-0.13023	1.40322	-0.942142	0.748524	0.5378	-0.352039	-1.36211	0.680908	0.673645	-0.924381	0.763702	-0.471344	-0.169453	0.3419	0.494061	1.24632		10	10.8413	0.0973442	-1.99976	1.90543	-0.389595	-0.254307	1.07691	-1.26049	0.22929	0.444637	-2.87819	-0.337692	2.34467	-0.637844	1.15723	0.293213	-0.679932	-0.117973	0.124889	2.62513	0.144054	0.157215
	10	10.872	0.130073	-0.397366	-0.408844	0.743217	1.04922	-0.290398	1.51845	-1.03165	0.732311	0.452503	-0.390713	-1.509	0.669739	0.610226	-0.714176	0.548019	-0.48254	-0.228699	0.276848	0.453434	1.00086		10	10.872	0.0709757	-1.84183	1.76389	-0.203892	-0.421295	0.840481	-1.17334	0.297001	0.170338	-2.82458	-0.226326	2.24257	-0.50362	1.33766	0.428398	-1.22129	-0.0441589	0.103371	2.4544	0.104122	0.137619
	10	10.9028	0.140796	-0.630825	-0.818508	0.706738	0.825741	-0.103954	1.33737	-0.716908	0.725239	0.358078	-0.41716	-1.55968	0.690136	0.760254	-0.464314	0.390091	-0.200809	0.0661545	0.0684814	0.413712	1.38607		10	10.9028	0.0448883	-2.10639	1.78083	-0.0551834	-0.363239	0.805828	-1.49941	0.568417	0.459969	-3.03825	-0.19743	2.18117	-0.657082	1.77701	0.32893	-1.74286	0.0407906	0.0950394	2.45133	0.0929871	-0.0246849
	10	10.9335	0.0840843	-0.736374	-0.69957	0.412064	0.761093	-0.435215	1.06786	-0.812706	0.786129	0.352859	-0.535454	-1.35068	0.824055	0.931877	-0.256794	0.224892	-0.139095	0.0535889	-0.0478554	-0.0548286	1.33584		10	10.9335	0.118839	-1.75379	1.65554	0.0723267	0.00706863	1.07195	-1.08647	0.378922	0.16959	-2.76303	-0.454884	2.20665	-0.471905	1.78285	0.651344	-1.67548	0.30547	-0.216206	2.26584	0.144642	0.0863571
	10	10.9642	0.0641069	-0.799206	-0.844856	0.464802	0.652611	-0.368004	0.822056	-0.72097	0.794941	0.161621	-0.305691	-1.47438	0.955803	1.20934	-0.359806	0.326061	-0.366795	-0.00479889	-0.127689	-0.123802	1.39091		10	10.9642	0.0855698	-1.94965	1.66973	0.0712662	-0.499943	1.35151	-1.14457	0.22599	-0.22298	-2.55198	-0.60902	2.49565	-0.456581	2.00272	0.316936	-1.84838	0.214893	0.0940361	2.26485	0.16486	0.122063
	10	10.9949	0.0185484	-0.85416	-0.70322	0.599915	0.793396	-0.737457	0.674286	-0.631935	0.839001	0.124031	-0.306549	-1.55789	0.927601	0.932304	-0.344593	0.245827	-0.401596	0.121826	-0.318245	-0.153214	1.12164		10	10.9949	0.10431	-1.69015	1.66549	-0.020443	-0.888332	1.39629	-0.917751	0.2481	-0.291672	-2.63859	-0.415043	2.45743	-0.614368	2.02114	0.448792	-1.87444	0.315125	0.188629	1.9719	0.458481	0.265602
	10	11.0256	0.0205584	-0.76292	-0.9561	0.786404	0.723038	-0.861897	0.695614	-0.879639	1.0124	0.19128	-0.440693	-1.48852	1.07193	0.821003	-0.063961	0.128357	-0.151314	-0.301552	-0.180702	-0.090519	1.15896		10	11.0256	0.142847	-1.67165	1.57663	0.253929	-1.08179	1.42531	-0.916725	0.672054	-0.488945	-2.23316	-0.67001	2.67339	-0.494896	2.17389	0.2127	-2.08143	0.529358	0.339893	1.99139	0.437527	0.209465
	10	11.0564	-0.0809309	-0.720863	-0.970238	0.46051	0.698269	-0.939064	0.412952	-0.806076	0.684937	0.0522232	-0.623253	-1.59118	0.901699	0.97929	0.229603	0.00324249	-0.0930901	-0.349781	-0.365238	-0.543373	0.960808		10	11.0564	0.12037	-1.5163	1.34817	0.336746	-1.37983	1.6626	-0.913696	0.986984	-0.693024	-2.21909	-0.859478	2.59542	-0.623783	2.18108	0.0717545	-2.22344	0.570148	0.370113	1.70957	0.754669	0.248791
	10	11.0871	-0.0724581	-0.795677	-0.63166	0.567719	0.642303	-1.22311	0.582912	-0.636452	0.887733	-0.101177	-0.584164	-1.58085	1.02568	0.952381	0.048748	-0.194359	-0.665394	-0.14201	-0.470512	-0.270573	1.1393		10	11.0871	0.103655	-1.54463	1.32235	0.545601	-1.14189	1.71012	-0.960873	0.761486	-0.871227	-1.88451	-1.41098	2.59568	-0.652431	2.35693	-0.09021	-2.43189	0.815849	0.294189	1.84419	0.679379	0.135963
	10	11.1178	-0.16999	-0.926476	-0.766163	0.687389	0.618652	-1.25361	0.396622	-0.513	0.525909	-0.402802	-0.539089	-1.80001	0.794586	0.878326	0.328308	-0.152573	-0.704659	-0.742123	-0.456387	-0.221928	0.849228		10	11.1178	0.0891312	-1.42407	1.27556	0.697521	-1.1592	1.64341	-0.992447	0.808758	-1.14138	-2.00863	-1.37098	2.4223	-0.584412	2.09995	-0.207607	-2.1751	0.628445	0.364582	1.60139	1.04846	0.256077
	10	11.1485	-0.0925562	-0.80164	-0.794048	0.570389	0.527561	-1.12262	0.447277	-0.300331	0.727566	-0.175358	-0.619308	-1.73334	0.945068	0.931152	0.321808	-0.144264	-0.773468	-0.0421028	-0.622517	-0.081295	0.888351		10	11.1485	0.12388	-1.47929	1.20532	1.17282	-1.09575	1.49822	-0.761578	0.787975	-1.20803	-1.84865	-1.27531	2.49508	-0.880459	2.26342	-0.141922	-2.36633	0.706905	0.330799	1.76734	0.968735	0.33831
	10	11.1792	-0.136314	-1.15544	-1.0027	0.588055	0.542191	-1.32611	0.333	-0.175629	0.535435	0.0380478	-0.550865	-1.96867	0.850616	1.00619	0.391594	-0.240467	-0.842178	0.238911	-0.758774	-0.161495	0.932007		10	11.1792	0.0665464	-1.52327	1.07494	1.15022	-1.3001	1.56208	-1.0392	0.89225	-1.32758	-1.98571	-1.32861	2.41201	-0.986801	2.34731	-0.277409	-2.29512	0.655918	0.639729	1.22981	1.17412	0.256348
	10	11.21	-0.137688	-1.13762	-1.04651	0.506134	0.314415	-1.28506	0.357639	0.259678	0.822823	-0.232666	-0.729012	-1.91666	0.91909	0.926933	0.134521	-0.0684586	-0.837173	0.463608	-0.904781	-0.235718	0.935059		10	11.21	0.0861057	-1.19332	1.25564	1.20016	-1.04936	1.59195	-1.05662	0.713326	-1.2438	-1.92827	-1.33899	2.15692	-1.04833	2.2762	-0.491184	-2.29449	0.704716	0.627033	1.28185	1.2669	0.291779
	10	11.2407	-0.250626	-1.16024	-1.05922	0.582619	0.0828056	-1.47074	0.29364	0.120392	0.472122	-0.408627	-0.897621	-2.02413	0.678547	0.60981	0.0783615	-0.334045	-0.878418	0.618019	-1.01121	-0.149578	0.844986		10	11.2407	0.0692232	-1.22603	1.09314	1.31482	-1.21454	1.39563	-0.903625	0.620701	-1.43253	-1.89779	-1.36986	2.35944	-0.870945	2.29045	-0.563663	-2.14424	0.831505	0.689976	1.01167	1.32052	0.0798149
	10	11.2714	-0.204173	-1.10683	-0.957851	0.669533	0.372768	-1.44792	-0.0516281	0.241333	0.665276	-0.63073	-0.921219	-1.88257	0.678284	0.666492	-0.0221901	-0.40102	-0.838173	0.787189	-0.815216	-0.319069	1.23008		10	11.2714	0.0727684	-0.966908	0.995346	1.52415	-1.36633	1.40669	-0.765842	0.870872	-1.3347	-1.71357	-1.47834	2.37901	-0.747372	2.11954	-0.845081	-2.26833	0.883274	0.395885	1.04982	1.14261	0.174644
	10	11.3021	-0.207408	-1.15366	-1.01974	0.529224	0.427399	-1.50265	-0.144382	0.369827	0.572746	-0.598591	-1.0266	-1.98784	0.537022	0.762779	0.0787888	-0.490974	-0.698341	0.980858	-0.921455	-0.0415154	1.17895		10	11.3021	0.073247	-0.911125	0.984798	1.50135	-1.28635	1.39114	-0.636906	0.904251	-1.36801	-1.81702	-1.30002	2.307	-0.737942	1.91338	-0.54937	-2.18211	0.798939	0.492626	0.771301	1.1771	0.0119133
	10	11.3328	-0.14553	-1.26949	-0.750927	0.753883	0.283802	-1.63945	0.238548	0.395351	0.635677	-0.781609	-1.16378	-2.04153	0.800537	0.6353	0.2705	-0.481091	-0.645054	1.20525	-0.694553	-0.0625534	1.4006		10	11.3328	0.0451595	-0.862583	0.739594	1.34637	-1.24912	1.22364	-0.548748	0.823307	-1.40273	-1.76177	-1.41272	2.41094	-0.612461	1.91601	-0.588661	-2.33384	0.633675	0.448925	1.02703	1.18583	-0.0794983
	10	11.3636	-0.139507	-1.34475	-0.86264	0.858635	0.33181	-1.47856	0.293427	0.483521	0.606625	-0.686935	-1.12469	-2.07056	0.799084	0.55899	0.106422	-0.304924	-0.736622	1.39014	-0.697071	0.0184135	1.06954		10	11.3636	0.0214865	-0.722813	0.839825	1.72714	-1.28984	1.0631	-0.473232	0.607159	-1.42348	-1.99851	-1.39368	2.37315	-0.518658	1.47227	-0.445408	-2.30936	0.570637	0.453632	0.934296	1.02666	-0.0631638
	10	11.3943	-0.120455	-1.10499	-1.19252	0.774952	0.228931	-1.64243	0.381672	0.627438	0.539104	-0.728363	-1.24242	-1.91231	1.08311	0.373596	0.329868	-0.17905	-0.377613	1.26195	-0.738087	0.0944061	1.01366		10	11.3943	0.00558815	-0.857307	0.949547	1.81144	-1.22438	1.26139	-0.607685	0.509922	-1.17488	-2.06733	-1.56204	2.4532	-0.638592	1.31485	-0.470242	-2.36599	0.476429	0.321301	0.998405	1.02741	-0.0436783
	10	11.425	-0.0685398	-1.41964	-1.18263	0.712925	0.342953	-1.735	0.729065	0.896843	0.44836	-0.703186	-1.04317	-1.9338	0.890491	0.165886	0.429256	-0.0330048	-0.269878	1.44038	-0.746803	0.407299	1.23287		10	11.425	-0.00151291	-0.702965	1.07075	1.92612	-0.924931	1.20731	-0.649975	0.701946	-1.24737	-2.00963	-1.74196	2.53201	-0.642731	1.01575	-0.443562	-2.41879	0.446171	0.552326	0.709011	0.591175	-0.000904083
	10	11.4557	-0.0719301	-1.31723	-0.986546	0.776726	0.300179	-1.61252	0.728691	0.76173	0.219685	-0.821465	-1.10485	-2.00097	0.702999	0.286167	0.256149	0.0863457	-0.566795	1.8124	-0.58046	0.315292	1.30587		10	11.4557	0.0220238	-0.615799	0.924797	1.92723	-1.03744	0.943657	-0.540264	0.467205	-0.992764	-1.98976	-1.45461	2.56583	-0.330769	1.27317	-0.566978	-2.37366	0.508972	0.317921	0.901501	0.579399	-0.0671692
	10	11.4864	-0.0547415	-1.54034	-1.26459	0.901218	0.429619	-1.4588	0.578964	0.838356	0.419552	-0.618362	-1.10571	-2.14753	0.800465	0.344318	0.353519	-0.214062	-0.475315	1.97826	-0.483864	0.25943	1.31006		10	11.4864	-0.00231152	-0.775814	0.885044	2.07096	-0.80291	0.867138	-0.487705	0.638916	-0.862	-2.01327	-1.32921	2.61111	-0.259457	0.727898	-0.711853	-2.56041	0.387173	0.347202	0.770382	0.648708	-0.198135
	10	11.5172	-0.0206198	-1.38695	-1.35241	0.986225	0.374344	-1.44703	0.851227	0.8629	0.654118	-0.439217	-0.902035	-2.22626	0.713692	0.293701	0.234478	-0.21796	-0.415733	1.78628	-0.489243	0.36591	1.34156		10	11.5172	-0.0119139	-0.866161	0.747509	1.75569	-0.739075	0.986263	-0.296612	0.957111	-1.06548	-1.81326	-1.19669	2.12761	-0.260998	0.792244	-0.580009	-2.51669	0.196678	0.00764465	0.910835	0.712936	-0.0978317
	10	11.5479	0.00343399	-1.52998	-1.3806	1.12307	0.42527	-1.26068	0.720123	1.12043	0.526508	-0.604027	-1.00767	-1.87897	0.703407	0.0634842	0.342091	-0.603127	-0.0813141	1.70901	-0.281601	0.330441	1.63281		10	11.5479	0.0245255	-0.685081	0.818813	1.74359	-0.510727	1.09645	-0.473972	1.00798	-0.965702	-1.78578	-1.29392	2.08809	0.186562	0.890926	-0.672859	-2.30445	0.185318	0.354568	0.76733	0.32436	-0.280975
	10	11.5786	0.00598583	-1.55243	-1.54187	1.2188	0.383904	-1.5417	0.763489	1.15196	0.587383	-0.976482	-0.916626	-1.83873	0.640556	0.268547	0.497501	-0.413879	-0.0186005	1.85233	-0.346748	0.312321	1.59		10	11.5786	-0.00246735	-0.572475	0.584373	1.56482	-0.329639	1.07299	-0.35915	0.729504	-1.1752	-1.65356	-1.25735	2.38157	0.0439415	0.889877	-0.47757	-2.42468	0.199886	0.132908	0.66082	0.180035	-0.240429
	10	11.6093	0.066423	-1.71872	-1.41089	1.19831	0.53867	-1.25352	0.95332	1.14051	0.741783	-0.693062	-0.868847	-1.77553	0.873074	-0.00239944	0.689308	-0.590801	-0.0669365	2.08652	-0.406055	0.331005	1.56272		10	11.6093	-0.00881653	-0.626572	0.51572	1.40243	-0.223827	0.875385	-0.577312	1.02141	-0.778355	-1.3555	-0.994057	2.18918	0.399651	0.779823	-0.639778	-2.09119	0.13414	-0.338932	0.551765	-0.315075	-0.105236
	10	11.64	0.0379108	-1.5537	-1.52531	1.11463	0.546539	-1.23145	1.05334	1.09381	0.615627	-0.73674	-0.885384	-1.73039	0.964149	0.0796738	0.817783	-0.702427	0.00222778	1.90959	-0.67857	0.139866	1.46494		10	11.64	-0.0404999	-0.605347	0.364361	1.01896	-0.320984	0.654922	-0.314373	1.19753	-1.08778	-1.49119	-0.832481	2.22093	0.523388	0.318779	-0.589767	-1.79872	0.145275	-0.0907516	0.448586	-0.292919	-0.278408
	10	11.6708	0.116416	-1.6021	-1.23076	1.25815	0.715664	-1.20838	1.17574	1.30858	0.767525	-0.670815	-0.695541	-1.63634	0.949917	-0.122169	0.974831	-0.629662	-0.172653	1.98453	-0.822144	0.258381	1.72557		10	11.6708	-0.00013752	-0.746418	0.30373	1.07333	-0.192558	0.673862	-0.352509	1.27944	-1.13786	-1.47223	-0.764748	2.09951	0.983356	0.131493	-0.525768	-1.95407	-0.191494	0.534145	0.457115	-0.180908	-0.020153
	10	11.7015	0.0914095	-1.71211	-1.26326	1.40705	0.522648	-1.19157	1.10958	1.0786	0.794643	-0.600052	-0.763798	-1.50344	0.67308	-0.121933	1.0774	-0.564941	-0.25536	2.12	-0.665085	0.294788	1.39196		10	11.7015	-0.0788198	-0.765945	0.214947	1.15092	-0.240185	0.861282	-1.04628	1.27774	-1.36301	-1.39006	-0.893478	2.10776	0.787628	0.0420456	-0.733109	-1.88263	-0.333782	0.576511	0.18837	-0.272007	0.136902
	10	11.7322	0.129988	-2.00178	-0.994175	1.57501	0.596645	-0.898563	1.27112	0.982719	0.848976	-0.582985	-0.465622	-1.42281	1.07098	-0.43457	1.26185	-0.836239	-0.254753	2.0371	-0.821869	0.24696	1.42178		10	11.7322	-0.0945467	-0.664196	-0.0176697	0.964058	0.103855	0.801987	-0.709602	1.14285	-1.31897	-1.56635	-0.928612	2.08521	1.0705	0.00075531	-0.783772	-1.80441	-0.282948	0.525433	0.255028	-0.555729	-0.208351
	10	11.7629	0.12761	-1.768	-0.997395	1.49875	0.356018	-1.16993	1.229	0.901573	0.995678	-0.887348	-0.650658	-1.35064	1.12862	-0.107365	1.33923	-0.549088	-0.221836	1.9463	-0.881989	0.21545	1.52583		10	11.7629	-0.144692	-0.740631	0.0632744	0.60519	0.344753	0.419254	-0.698856	1.1636	-1.38993	-1.2728	-0.828987	1.9122	0.978443	-0.083622	-1.01577	-2.01475	-0.39608	0.407234	0.316544	-0.280308	-0.382614
	10	11.7936	0.155788	-1.64662	-1.16027	2.024	0.515808	-0.987892	0.988533	0.859386	1.0057	-0.957561	-0.571671	-0.991634	1.19028	-0.274864	1.55433	-0.925789	-0.381721	2.25532	-1.00146	0.22784	1.39403		10	11.7936	-0.158654	-1.01273	-0.276985	0.618732	0.335094	0.370617	-0.73064	1.25763	-1.28969	-0.948833	-0.837284	1.89312	1.39235	-0.431461	-1.09423	-2.12781	-0.548603	0.438721	0.031929	0.0922699	-0.305279
	10	11.8244	0.165906	-1.7193	-0.981548	2.07971	0.399006	-0.920597	1.027	0.869148	0.841537	-0.97374	-0.707737	-0.695602	0.98946	-0.0444717	1.54099	-0.712044	-0.109566	1.95519	-0.772038	0.169621	1.08311		10	11.8244	-0.185785	-1.08669	-0.272255	0.458847	0.360012	0.295006	-0.641422	1.17417	-1.42117	-1.14039	-1.02899	1.77457	1.37445	-0.520264	-1.06191	-1.92548	-0.435848	0.507481	-0.114616	0.0804596	-0.0916557
	10	11.8551	0.156631	-1.60368	-1.13638	2.05083	0.498009	-0.806644	0.799072	0.711662	0.874191	-1.1676	-0.470032	-0.747887	1.05387	-0.0274582	1.51662	-0.824738	-0.0556526	1.90101	-0.404675	-0.0200806	0.992172		10	11.8551	-0.171382	-0.768044	-0.436237	0.381149	0.442074	0.241344	-0.582714	1.2543	-1.34129	-0.809742	-1.03676	1.52217	1.84672	-0.592274	-1.43041	-1.85712	-0.76627	0.763336	-0.321625	0.27528	-0.211533
	10	11.8858	0.151773	-1.61248	-1.24377	2.35782	0.530518	-1.07016	0.868584	0.545341	0.870544	-1.2221	-0.681164	-0.726524	0.962162	-0.0671539	1.78819	-0.648403	0.158035	1.79556	-0.505619	-0.0696716	1.00575		10	11.8858	-0.213512	-1.04201	-0.541546	0.119221	0.36137	0.0551643	-0.290367	1.33984	-1.51527	-0.925076	-1.07332	1.69752	1.78189	-0.769371	-1.43698	-1.71835	-0.623005	0.89983	-0.532013	0.16605	-0.223835
	10	11.9165	0.194421	-1.57496	-1.0276	2.21733	0.561012	-0.878292	1.05515	0.475868	0.716679	-1.37433	-0.313511	-0.542763	1.10848	0.116692	1.82546	-0.642284	0.109421	1.78136	-0.335827	0.0646782	0.545864		10	11.9165	-0.209051	-0.947475	-0.921181	-0.111973	0.493183	0.492569	-0.295444	1.11251	-1.35895	-0.710201	-1.10869	1.62651	1.5345	-0.485691	-1.55879	-1.57597	-0.713795	1.03482	-0.560257	0.308182	-0.434898
	10	11.9472	0.260289	-1.84119	-0.866653	2.18827	0.690891	-0.886421	1.10693	0.278194	0.916546	-1.298	-0.222149	-0.14204	0.987228	0.210159	1.87865	-0.777565	0.34885	1.7617	-0.255211	0.288303	0.839275		10	11.9472	-0.18475	-0.815773	-0.696613	-0.149773	0.248169	0.169575	-0.433155	1.38197	-1.48341	-0.412884	-1.28567	1.27565	1.73465	-0.323875	-1.59673	-1.31168	-0.555542	1.55396	-0.383812	0.170559	-0.780628
	10	11.978	0.252808	-1.60771	-0.689819	2.13385	0.399078	-0.631012	1.13873	0.403099	0.84557	-1.49299	-0.318375	-0.0437202	1.26358	0.282806	1.97379	-0.888905	0.0318489	1.66167	-0.290813	0.326523	0.558952		10	11.978	-0.08619	-0.981247	-1.13769	0.196659	0.371002	0.230701	-0.632362	1.60637	-1.14442	-0.114502	-1.15662	1.29013	2.10582	-0.0985336	-1.38623	-1.38084	-0.689213	1.67413	-0.172764	0.287037	-0.59124
	10	12.0087	0.305272	-1.63402	-0.870159	2.17094	0.611984	-0.557125	1.09609	0.285847	1.13513	-1.16119	-0.232365	0.338528	0.962494	0.264725	1.90108	-0.721153	0.0363808	1.67159	-0.107876	0.473553	0.440975		10	12.0087	-0.0607107	-1.05136	-1.10849	-0.0341377	0.276257	0.368534	-0.54446	1.5131	-1.18707	-0.00774765	-0.932697	1.32424	1.9524	-0.431343	-1.40103	-1.14461	-0.322266	2.11771	-0.461884	0.348522	-0.487873
	10	12.0394	0.277755	-1.63176	-0.675743	2.27427	0.924995	-0.7934	0.91119	0.367371	1.23957	-1.41707	-0.0596924	0.573143	0.993324	0.186356	1.88657	-0.933525	-0.15469	1.52996	-0.00993347	-0.128407	0.472588		10	12.0394	-0.0678715	-1.09935	-1.05717	-0.226685	0.205875	0.147602	-0.503036	1.66581	-1.13479	0.361286	-1.13558	0.943279	1.85892	-0.434776	-1.26878	-0.919067	-0.659866	2.33694	-0.383171	0.448269	-0.503132
	10	12.0701	0.32683	-1.39125	-0.840015	2.32706	1.16247	-0.949841	0.962688	0.174385	1.88786	-1.29166	-0.0554733	0.768215	0.996517	0.38554	1.7192	-0.83456	0.140736	1.28528	0.0898438	-0.26075	0.260349		10	12.0701	-0.0245867	-1.10996	-0.895599	-0.156326	0.280235	0.135551	-0.3139	1.81748	-1.21109	0.718937	-1.54673	1.36358	1.61717	-0.302158	-1.23743	-0.880474	-0.465897	2.52824	-0.267323	0.224728	-0.79076
	10	12.1008	0.200032	-1.4146	-0.887363	2.09745	0.744949	-1.04193	0.601173	0.0517769	1.44799	-1.36871	0.0447273	0.894627	0.978493	0.254116	1.63137	-0.78101	0.065155	1.08283	-0.254375	-0.294964	0.148945		10	12.1008	0.0780411	-1.12434	-0.95723	-0.354015	0.313541	0.13176	-0.0145378	1.84541	-1.05865	0.865826	-1.44126	1.33996	1.93345	-0.0452461	-1.26525	-0.443264	-0.636189	3.07893	-0.38905	0.437023	-0.656063
	10	12.1316	0.167117	-1.45412	-1.07948	2.20909	0.844482	-1.03596	0.609352	0.0163231	1.05794	-1.30991	0.0902176	1.16945	0.790955	0.168602	1.51759	-0.980446	0.0750389	1.08224	-0.282055	-0.402111	0.25515		10	12.1316	0.0715092	-1.425	-0.796608	-0.442883	0.637127	-0.151241	-0.124783	2.15229	-0.588486	0.881245	-1.69024	1.3046	1.83244	-0.396534	-1.49957	-0.6535	-0.578049	3.38218	-0.32795	0.531605	-0.616463
	10	12.1623	0.125429	-1.54476	-0.798267	2.04322	0.569473	-0.901234	0.5564	0.0490265	0.685135	-1.49075	0.154064	0.896572	0.83147	0.186569	1.58108	-0.827583	-0.323826	1.17828	-0.169937	-0.345928	0.179581		10	12.1623	0.0883156	-0.962112	-1.00712	-0.32233	0.678242	-0.160305	-0.0677414	2.41166	-0.44236	1.24584	-1.6992	1.10876	1.71508	-0.307449	-1.84881	-0.55965	-0.678329	3.62604	-0.61129	0.462833	-0.815445
	10	12.193	0.12721	-1.22946	-0.744148	2.02851	0.664509	-0.617161	0.41634	-0.209362	0.950375	-1.38187	0.425625	0.945709	0.534798	0.198395	1.42683	-1.05968	-0.288857	1.12839	-0.184994	-0.466743	0.00698853		10	12.193	0.142919	-1.18454	-1.03801	-0.460232	0.877369	0.0704384	-0.011116	2.5656	-0.190853	1.41151	-1.74028	1.01822	2.08115	-0.440487	-1.84766	-0.315067	-0.788002	3.86419	-0.351364	0.299526	-0.962002
	10	12.2237	-0.00177555	-1.08445	-0.969963	1.81768	0.420738	-0.642136	0.0870972	-0.427452	0.836857	-1.64012	0.62928	0.922153	0.445877	0.0563316	1.28825	-1.09164	-0.318077	0.809006	-0.341431	-0.573151	-0.260357		10	12.2237	0.236958	-1.2866	-1.02263	-0.448833	0.961628	-0.078968	0.108795	2.68754	-0.0625	1.72639	-1.51066	1.11975	2.1686	-0.305077	-1.52295	-0.334965	-0.957516	4.13314	-0.559528	0.805111	-0.881561
	10	12.2544	0.0490635	-1.25477	-0.973801	2.16532	0.807823	-0.80582	0.180473	-0.677673	1.02707	-1.24203	0.605042	1.18928	0.600563	0.0778618	1.13884	-1.36998	-0.328712	0.679844	-0.285568	-0.431625	-0.120857		10	12.2544	0.247973	-1.24493	-0.82835	-0.480904	0.880875	-0.139408	-0.0346718	2.73074	0.13118	1.71595	-1.3473	1.18774	2.21517	-0.529823	-1.5206	-0.520466	-0.808315	4.28275	-0.377579	0.716465	-1.06905
	10	12.2852	0.0488293	-1.18938	-0.949623	2.06725	0.907684	-0.617039	-0.145973	-0.74572	0.914341	-1.0612	0.685963	0.902615	0.534996	-0.0607529	1.17973	-1.00754	-0.135498	0.665203	-0.387589	-0.498646	-0.0822258		10	12.2852	0.264024	-1.11518	-1.02131	-0.229118	0.808357	-0.292004	-0.00981903	2.67579	0.215019	1.84209	-1.2557	1.09458	2.33842	-0.484383	-1.3748	-0.5159	-0.913303	4.29256	-0.457047	0.510258	-0.828033
	10	12.3159	-0.0100857	-1.14155	-1.1135	1.7737	1.06078	-0.664341	-0.0819168	-0.721783	1.00306	-0.786926	0.798702	0.974068	0.516899	-0.238148	0.97187	-1.08109	-0.494686	0.27861	-0.329548	-0.577229	-0.348682		10	12.3159	0.28087	-1.16845	-0.692142	-0.133453	0.855923	-0.753132	-0.151012	2.72558	0.123573	1.96698	-1.44544	1.2176	2.36401	-0.154575	-1.27854	-0.605	-1.06543	4.41311	-0.414299	0.772945	-0.960835
	10	12.3466	-0.0718134	-1.31294	-0.969761	1.53057	0.897766	-0.597633	-0.110504	-0.712166	0.493534	-0.699997	0.68383	0.897072	0.545464	-0.14793	0.888329	-1.12908	-0.341858	0.00124359	-0.136654	-0.605053	-0.6105		10	12.3466	0.351307	-1.04737	-0.636318	-0.235237	1.05042	-0.465431	-0.0830841	2.95956	-0.0366669	2.08652	-1.47966	1.20549	2.46193	-0.446281	-1.33969	-0.319061	-0.819866	4.54923	-0.515388	0.832504	-0.695473
	10	12.3773	-0.0818466	-1.22457	-0.672676	1.67558	0.783287	-0.463703	-0.220833	-0.838646	0.415974	-0.296799	0.841164	0.849636	0.644897	-0.217812	0.586777	-1.32525	-0.488033	-0.0177002	-0.108997	-0.818699	-0.740532		10	12.3773	0.350488	-0.953491	-0.965229	-0.203987	1.02753	-0.582413	0.134426	2.9141	0.280201	2.08014	-1.28264	0.913658	2.10792	-0.460945	-1.32355	-0.471588	-0.528473	4.61782	-0.41507	0.774044	-0.652702
	10	12.408	-0.0633129	-1.1373	-1.06736	1.99149	0.77565	-0.608089	-0.289009	-0.703865	0.0946693	-0.0479622	0.839947	0.800823	0.613617	0.087532	0.427635	-1.33727	-0.486126	0.0951462	-0.0546761	-0.496666	-0.764446		10	12.408	0.405387	-0.778877	-0.877392	-0.116371	1.12662	-0.609486	0.123783	3.099	0.21125	2.13605	-1.23778	0.981369	1.85754	-0.660404	-1.30986	-0.263512	-0.66674	4.61627	-0.547535	1.42489	-0.401077
	10	12.4388	-0.0954327	-0.884144	-0.829796	1.73395	0.890495	-0.497547	-0.35989	-0.915951	0.26366	0.549229	0.483856	0.590786	0.727821	0.150841	0.122086	-1.50576	-0.590664	-0.334557	-0.064888	-0.662628	-0.775558		10	12.4388	0.428383	-0.699242	-1.01638	-0.170395	1.08761	-0.360588	-0.0695992	2.97677	0.21521	2.36263	-1.18454	0.854149	1.9359	-0.399368	-1.31646	-0.0937424	-0.512737	4.60582	-0.25993	1.09684	-0.484276
	10	12.4695	-0.137682	-0.99297	-0.863819	1.69532	0.524284	-0.456982	-0.507389	-0.857178	0.239578	0.54438	0.613571	0.388535	0.605522	0.315849	-0.215538	-1.68421	-0.360851	-0.291187	-0.0183983	-0.545898	-0.886253		10	12.4695	0.433274	-0.588894	-0.618412	-0.0769806	0.970661	-0.550705	0.102261	3.00365	0.163303	2.08851	-1.38407	0.715176	2.07865	-0.0565872	-1.16933	0.0534096	-0.623791	4.44042	-0.163609	0.794533	-0.512703
	10	12.5002	-0.140944	-0.703838	-0.555923	1.73407	0.80011	-0.497036	-0.529633	-1.0774	-0.0619354	0.747799	0.292873	0.517914	0.724125	0.30777	-0.445122	-1.72634	-0.544506	-0.480434	0.180038	-0.365108	-1.13631		10	12.5002	0.431747	-0.535606	-0.756847	-0.118324	1.09774	-0.485767	-0.167416	2.91714	-0.0593872	2.19965	-1.42191	0.629704	2.25251	-0.0425758	-1.14984	-0.10532	-0.528004	4.23392	-0.0448189	0.944618	-0.224525
	10	12.5309	-0.112978	-0.948948	-0.114433	1.71332	0.86161	-0.477161	-0.513741	-0.85973	-0.16597	1.05048	0.313828	0.370502	0.550446	0.237076	-0.65847	-1.60397	-0.6964	-0.317574	0.0790443	-0.106792	-0.972672		10	12.5309	0.444886	-0.587044	-0.940063	0.207508	1.16007	-0.404037	0.0390091	2.875	-0.0454559	1.73568	-1.21464	0.346581	2.28743	-0.221882	-0.8321	-0.154816	-0.439949	4.37075	-0.441536	0.86644	0.290779
	10	12.5616	-0.161635	-0.888748	-0.020462	1.41788	0.60421	-0.438107	-0.544308	-1.19317	-0.282879	1.01994	0.225708	0.414402	0.427017	0.572262	-0.64748	-1.57529	-0.531155	-0.345955	-0.0437889	-0.483814	-0.918964		10	12.5616	0.497512	-0.652966	-1.03835	0.0407944	1.03065	-0.548401	0.311203	2.88061	0.0781898	1.80653	-1.28128	0.493565	2.28183	-0.164383	-0.685654	-0.197575	-0.384277	4.26658	-0.16008	1.07347	0.799778
	10	12.5924	-0.177585	-1.00022	-0.000144958	1.50326	0.61517	-0.38792	-0.354691	-1.07504	-0.240009	1.34505	-0.0299149	0.162754	0.422344	0.360809	-1.00276	-1.55682	-0.363808	-0.408836	0.0552025	-0.365788	-1.23034		10	12.5924	0.464877	-0.528275	-1.12022	0.240719	1.11135	-0.610413	0.0838318	2.69649	0.208382	1.67595	-0.873951	0.599766	1.91462	-0.353157	-0.437134	-0.120243	-0.410027	4.06433	-0.122162	0.643257	0.634434
	10	12.6231	-0.189683	-0.891918	0.233749	1.3479	0.715553	-0.476376	-0.456299	-1.16499	-0.384514	1.60495	-0.301102	0.0169983	0.651199	0.449692	-0.949493	-1.78789	0.0310783	-0.530575	-0.201218	-0.252716	-1.44768		10	12.6231	0.419205	-0.257572	-1.24546	0.097168	1.0739	-0.231804	-0.241692	2.37669	-0.292751	1.71444	-0.996323	0.457706	2.11958	-0.215538	-0.295563	0.0207481	-0.656609	3.92054	-0.276787	0.85582	0.4576
	10	12.6538	-0.127364	-1.1575	0.528461	1.02782	0.889336	-0.566822	-0.139709	-1.34312	-0.208862	1.65985	-0.152229	0.00338364	0.258064	0.515217	-0.966225	-1.73038	-0.0827103	-0.201614	0.137394	0.0852509	-1.10288		10	12.6538	0.465475	-0.0523796	-1.04681	0.168385	1.12827	-0.312485	-0.290031	2.47663	-0.365707	1.60585	-1.00556	0.535583	2.14747	0.244621	-0.370831	-0.00811768	-0.436359	4.0883	-0.333363	0.787777	0.348259
	10	12.6845	-0.13659	-0.985332	0.73045	0.639683	0.732971	-0.709301	-0.110695	-1.2627	-0.23238	1.8373	-0.101852	-0.152126	-0.0643272	0.803535	-1.03876	-1.69235	-0.0132217	-0.352928	0.338619	0.0760956	-1.17449		10	12.6845	0.425173	0.00357819	-1.02025	-0.0483017	1.254	-0.158421	-0.274761	2.37651	-0.827599	1.49047	-1.03435	0.31142	1.97772	0.105743	-0.269859	-0.13015	-0.254459	3.89396	-0.1847	0.634769	0.658134
	10	12.7152	-0.0948561	-1.05116	0.789169	0.823933	0.74147	-0.743595	0.249962	-1.30761	0.262302	1.87879	-0.077858	-0.256634	-0.0563889	0.814194	-1.32442	-1.71195	0.169407	-0.266037	0.12973	0.307804	-1.26823		10	12.7152	0.436806	0.148178	-1.15412	-0.0322571	1.36646	0.231346	-0.396759	2.20601	-0.651993	1.10034	-1.22652	0.602913	2.1558	0.221718	-0.179893	-0.0287399	-0.0817108	3.67038	-0.4683	0.528255	0.72501
	10	12.746	-0.135051	-1.07434	1.21793	0.540737	0.681389	-0.879299	0.196316	-1.66318	0.205856	1.56465	-0.208225	-0.408333	-0.0655441	1.00912	-1.31739	-1.67256	0.0199509	-0.314949	0.403755	0.579563	-1.51648		10	12.746	0.447766	0.571766	-0.97908	0.0481644	1.1476	0.44199	-0.316914	2.06176	-0.540531	0.987743	-1.21346	0.515507	1.98956	0.356476	-0.363106	0.0212822	-0.247078	3.32335	-0.124008	0.652496	0.621811
	10	12.7767	-0.0584955	-1.11248	1.17362	0.670628	0.896576	-0.991478	0.332321	-1.59133	0.279625	1.45986	-0.177765	-0.557583	0.196957	1.14825	-1.32718	-1.69332	0.265846	-0.423866	0.625404	1.00079	-1.3448		10	12.7767	0.44568	0.732658	-0.680984	-0.00416946	1.47659	0.171791	-0.297768	1.89951	-0.42664	0.800228	-1.26874	0.777687	1.86974	0.260223	-0.205643	0.149563	-0.248222	3.14435	-0.208195	0.510853	0.46077
	10	12.8074	-0.00929546	-1.17228	1.61819	0.611538	1.08022	-1.24923	0.32077	-1.57179	0.41798	1.38884	-0.378551	-0.249912	0.179466	1.18825	-1.28431	-1.6317	0.784645	-0.545403	0.624142	0.993378	-1.31015		10	12.8074	0.461425	0.962391	-0.67802	0.177921	1.28077	0.521011	-0.382156	1.80048	-0.743317	0.799751	-1.28534	0.83189	1.99238	0.255409	-0.0845757	-0.0443306	-0.320095	3.18755	-0.263863	0.611713	0.608925
	10	12.8381	0.0747788	-1.06491	1.57246	0.579258	1.27469	-1.11406	0.671745	-1.63311	0.853603	1.56567	-0.119186	-0.645988	0.286983	1.02414	-1.17597	-1.39359	0.735294	-0.481018	0.706383	1.17594	-1.32275		10	12.8381	0.480097	1.12083	-0.701336	0.231697	1.26728	0.678429	-0.345642	1.71869	-0.61599	0.654041	-1.30338	0.852943	1.77629	0.624756	-0.165016	-0.0219078	-0.0864792	3.12172	-0.346523	0.566357	0.575188
	10	12.8688	0.0199125	-1.18853	1.63216	0.271515	1.2764	-1.24758	0.827435	-1.75137	0.889286	1.57176	-1.06418	-0.781124	0.431252	0.987946	-1.20282	-1.11496	0.716015	-0.543877	1.01532	1.01642	-1.34282		10	12.8688	0.458078	1.34363	-0.632195	0.175621	1.30342	0.843128	-0.464699	1.60317	-0.650951	0.675449	-1.15075	0.814915	1.23426	0.703087	-0.113312	0.166157	0.0356979	2.68377	-0.531933	0.5667	0.556389
	10	12.8996	0.133241	-1.15179	1.67702	0.159603	1.56348	-1.32572	1.06108	-1.77399	1.19809	1.20163	-0.399342	-1.08125	0.818333	1.29655	-1.32901	-1.15569	0.962517	-0.314522	1.40816	1.00354	-1.15388		10	12.8996	0.454056	1.57394	-0.353889	0.428871	1.5816	0.752411	-0.588318	1.48086	-0.377716	0.380169	-1.39728	0.836933	1.17209	0.728477	-0.0929298	-0.147545	-0.140278	2.62897	-0.569016	0.645428	0.538353
	10	12.9303	0.155207	-1.33171	1.55799	0.18037	1.88383	-1.44797	1.02881	-1.88064	1.52431	1.06625	-0.221729	-1.05906	0.702988	1.22503	-0.939529	-0.985466	0.852001	-0.476608	1.54568	0.958855	-1.07927		10	12.9303	0.532946	1.57657	-0.103489	0.586975	1.39841	1.06078	-0.609715	1.3978	-0.156128	0.244411	-1.40329	0.819054	1.38998	1.2417	0.0574989	-0.167915	0.11092	2.65885	-0.414497	0.629322	0.341679
	10	12.961	0.252105	-1.00956	1.51132	0.277428	1.79916	-1.24846	1.32693	-1.85859	1.76608	1.21775	-0.0581284	-1.28885	0.890827	0.980217	-1.20518	-0.879463	0.944874	-0.305222	1.71742	1.21308	-0.749557		10	12.961	0.542665	1.46289	-0.120914	0.515354	1.47693	1.30867	-0.611374	1.12312	-0.129627	0.179981	-1.05563	0.894596	1.12395	1.30112	-0.0549393	-0.125156	0.0860252	2.70868	-0.262234	0.616879	0.41497
	10	12.9917	0.205821	-1.32124	1.31777	0.24889	1.74632	-1.29889	1.4566	-2.13761	1.95467	1.36285	-0.15451	-1.33927	0.650738	0.821648	-0.988228	-0.74334	1.08621	-0.178383	1.49915	0.902195	-0.769142		10	12.9917	0.51237	1.6288	0.0290489	0.192215	1.69153	1.1605	-0.424667	1.24394	-0.125111	0.0711441	-1.1027	1.0097	1.01567	1.41105	-0.402946	-0.427044	0.0451775	2.57568	-0.319096	0.487427	0.487091
	10	13.0224	0.287284	-1.25351	1.22351	0.442722	1.57448	-1.49495	1.59317	-2.33763	2.20734	1.20373	-0.0202179	-1.28461	0.938019	0.851219	-0.869686	-0.530743	1.27589	-0.232147	1.71786	1.06665	-0.325436		10	13.0224	0.514097	1.61382	0.184223	0.0493317	1.93266	1.26677	-0.857777	1.05271	0.249317	-0.218784	-1.17838	1.0141	1.22065	1.63143	-0.298588	-0.453411	0.10273	2.30497	-0.292252	0.5979	0.360516
	10	13.0532	0.321934	-1.1655	1.30593	0.242691	1.53376	-1.37378	1.74065	-2.02393	2.34811	1.28911	0.0605927	-1.42791	0.883102	1.00495	-0.868446	-0.510654	1.29723	-0.283741	1.76931	0.925438	-0.308231		10	13.0532	0.551517	1.69406	0.465816	0.300182	1.75543	1.29219	-0.667004	1.02546	0.372086	-0.382271	-0.880268	1.15532	1.13766	1.67816	-0.240559	-0.332329	0.0947189	2.32543	-0.612194	0.538105	0.310341
	10	13.0839	0.356547	-0.894718	1.2096	0.414677	1.54874	-1.24221	1.95512	-2.03074	2.49538	1.50311	-0.149586	-1.45366	0.72744	1.24715	-1.1661	-0.27895	1.04582	-0.449142	1.61199	1.01883	0.0181961		10	13.0839	0.590478	1.60787	0.64312	0.221027	1.68843	1.48788	-0.770481	1.13048	0.574814	-0.178326	-0.585537	1.17052	0.848507	1.89747	-0.155373	-0.201378	0.111744	2.46095	-0.783905	0.483555	0.158184
	10	13.1146	0.363294	-1.06202	1.03409	0.430588	1.48002	-1.33217	2.03062	-2.10291	2.733	1.50259	-0.296425	-1.64124	0.512886	1.12423	-0.992355	-0.0564079	1.3508	-0.165329	1.5984	0.913422	0.204082		10	13.1146	0.576201	1.55203	0.949512	-0.00561523	1.67651	1.60603	-0.761147	1.2005	0.578548	-0.414703	-0.2579	1.14376	0.56963	2.03125	-0.334782	0.152317	0.0351372	1.99967	-0.588367	0.419918	-0.0282745
	10	13.1453	0.442652	-0.986221	0.774223	0.803593	1.62881	-1.53519	2.34707	-1.84062	2.78942	1.49903	-0.218239	-1.7743	0.647804	1.62128	-0.903496	0.43874	1.06326	-0.237774	1.60406	0.834911	0.296669		10	13.1453	0.585736	1.4703	0.975189	0.0548973	1.56957	1.58361	-0.568203	1.33653	0.612358	-0.395264	-0.239426	1.00802	0.814674	1.90121	-0.433022	-0.0477257	-0.179699	1.96174	-0.693176	0.459888	0.523251
	10	13.176	0.473182	-0.976902	0.764446	0.936241	1.65769	-1.47566	2.42517	-1.69213	2.63332	1.39964	-0.230671	-1.8779	0.196362	1.44189	-0.591988	0.510136	1.32022	-0.0581017	1.75072	0.94487	0.38628		10	13.176	0.520786	1.3955	1.2347	-0.121723	1.45356	1.38242	-0.753098	1.47056	0.558998	-0.65099	-0.384098	1.24342	0.874233	1.89735	-0.448914	-0.105495	-0.289684	1.66658	-0.741764	0.425713	0.308468
	10	13.2068	0.449875	-0.753502	0.559143	1.01021	1.46179	-1.48537	2.65026	-1.82304	2.40684	1.38353	-0.394955	-1.58139	-0.0635872	1.82875	-0.807755	0.47287	1.12884	0.238197	1.31744	0.929699	0.519531		10	13.2068	0.507104	1.43558	1.35189	-0.120636	1.44119	1.3027	-0.77066	1.04848	0.616528	-0.918888	-0.255795	1.18019	0.936626	1.99913	-0.401741	-0.2001	-0.306801	1.47041	-0.660782	0.582603	0.412132
	10	13.2375	0.495513	-0.76857	0.49939	1.48547	1.39903	-1.35627	2.73177	-1.81891	2.57289	1.4422	-0.372925	-1.66845	0.0652161	1.37366	-0.796471	0.677753	1.11669	0.331371	1.46683	0.916401	0.613194		10	13.2375	0.531678	1.28267	1.73939	-0.188076	1.34331	1.29794	-0.733063	1.22411	0.523338	-0.718918	-0.258354	1.49281	0.90572	1.70279	-0.407452	-0.369442	-0.0668335	1.55205	-0.679131	0.55098	0.439732
	10	13.2682	0.469578	-0.539043	0.0783882	2.01197	1.38376	-1.35668	3.08831	-2.05544	2.60385	1.37322	-0.6092	-1.90471	-0.0266953	1.37402	-0.874573	0.689857	1.08301	0.370567	1.3653	0.766094	0.569538		10	13.2682	0.459151	0.844978	1.5581	-0.0898819	1.13173	1.55123	-0.493244	1.39679	0.280701	-0.810551	-0.174709	1.58395	0.571678	1.71042	-0.559158	-0.56847	-0.269939	1.38374	-0.797852	0.634365	0.299137
	10	13.2989	0.533562	-0.733227	0.282223	2.41451	1.46351	-1.47537	3.08436	-1.78866	2.31263	1.22149	-0.385788	-1.95235	-0.0509758	1.37903	-0.892242	0.792122	1.07154	0.677181	1.63929	0.994236	0.617722		10	13.2989	0.44572	0.750534	1.58469	-0.327415	1.42665	1.30663	-0.16856	1.63734	0.169018	-0.982285	-0.0316658	1.70035	0.722286	1.38534	-0.523964	-0.381538	-0.447601	1.40242	-0.858398	0.544838	0.0057373
	10	13.3296	0.492374	-0.612217	0.298172	2.4888	1.04644	-1.47661	2.98064	-1.69944	2.40815	0.976357	-0.506855	-1.99129	-0.175087	1.56297	-0.972778	0.818172	0.87709	0.71769	1.42645	0.981991	0.698822		10	13.3296	0.429764	0.616528	1.64453	-0.47649	1.38337	1.21409	-0.038311	1.91325	-0.129818	-1.12957	0.18644	1.75357	0.49361	1.36156	-0.403038	-0.564499	-0.165443	1.37073	-1.07768	0.80183	-0.159382
	10	13.3604	0.583494	-0.698929	0.100513	2.90478	1.12838	-1.22963	3.03644	-1.2281	2.57013	0.877068	-0.241302	-1.79545	-0.302425	1.31012	-0.835938	0.760666	0.693031	0.933975	1.55382	1.02848	1.10426		10	13.3604	0.367117	0.508919	1.55212	-0.705708	1.23409	1.47341	-0.30138	1.87556	-0.0215034	-1.34911	-0.471039	1.98587	0.527584	1.39442	-0.461632	-0.687332	-0.27359	1.46411	-1.13189	0.957626	-0.228188
	10	13.3911	0.459276	-0.683575	-0.085659	3.10474	0.995827	-1.38279	2.96523	-1.46578	2.06144	0.651237	-0.207821	-1.82285	-0.64571	1.15966	-1.10386	0.920406	0.608273	1.00049	1.36487	0.94157	0.809818		10	13.3911	0.403862	0.340462	1.54497	-0.779522	1.24462	1.27308	-0.0691605	2.11555	0.051548	-1.51075	0.467758	2.09166	0.269974	1.53421	-0.495117	-0.724598	-0.43314	1.42363	-1.06238	0.996799	-0.202343
	10	13.4218	0.505211	-0.66016	-0.142982	3.03063	1.07835	-1.19205	2.79482	-0.946323	1.89882	0.765488	-0.221947	-1.74673	-0.469772	1.11378	-1.15661	0.895405	0.471348	1.32965	1.66417	0.914902	0.683422		10	13.4218	0.385641	0.0412827	1.46424	-0.648201	1.2649	1.36992	-0.0329704	2.06205	-0.0597839	-1.36471	0.811962	2.00278	0.379791	1.26231	-0.422699	-1.02014	-0.354485	1.07853	-1.11503	1.25041	-0.257347
	10	13.4525	0.435796	-0.581093	-0.188663	2.97079	0.90815	-1.52339	2.78121	-1.36903	2.12402	0.621269	-0.499416	-1.7173	-0.382294	1.08243	-1.16029	0.953007	0.226582	1.25899	1.62739	0.847515	0.73605		10	13.4525	0.333373	0.0271301	1.64634	-0.78331	1.19308	1.37852	0.145798	1.78978	-0.0419121	-1.44493	1.11235	1.88491	0.382366	1.16932	-0.623695	-1.04328	-0.369759	0.775566	-1.07104	0.845173	-0.304935
	10	13.4832	0.417396	-0.628452	-0.456661	2.95531	1.06341	-1.31191	2.74389	-1.59573	2.05205	0.616417	-0.56348	-1.72631	-0.327866	1.06739	-0.963562	0.521873	0.333927	1.20952	1.5914	0.917763	0.84893		10	13.4832	0.338116	-0.25766	1.58123	-0.957104	1.10589	1.69532	0.0390968	1.87004	-0.109573	-1.53453	0.936764	2.21579	0.39072	0.929241	-0.398907	-0.928089	-0.307491	0.754841	-0.98941	0.909283	-0.183128
	10	13.514	0.370637	-0.616745	-0.765541	3.20041	0.925327	-1.1657	2.65597	-1.52388	1.81317	0.292107	-0.317669	-1.81236	-0.644447	1.03226	-1.05725	0.65868	0.229034	1.29998	1.58791	0.81509	0.806396		10	13.514	0.290092	-0.308212	1.53295	-1.13691	1.05997	1.60999	0.308292	1.7761	-0.355885	-1.47694	0.9464	2.07022	0.297558	0.591244	-0.434048	-0.807995	-0.431721	0.751907	-0.857788	1.0188	-0.352097
	10	13.5447	0.395684	-0.321224	-0.664261	3.1245	1.13514	-1.03935	2.4187	-1.24532	1.6839	0.0596275	-0.176468	-2.05688	-0.199677	0.972923	-0.949722	0.533764	-0.0652199	1.38335	1.51182	1.1673	0.640778		10	13.5447	0.230801	-0.847839	1.42071	-1.0005	1.26143	1.80418	0.333099	1.71024	-0.361885	-1.55534	0.915031	1.94304	0.126003	0.290573	-0.622242	-0.975033	-0.261326	0.720509	-0.617096	0.813122	-0.480652
	10	13.5754	0.285932	-0.405499	-0.789215	3.07524	0.98275	-1.09135	2.28001	-1.30075	1.28724	-0.185314	-0.180889	-2.0211	-0.536751	0.995464	-0.989788	0.339508	-0.0189438	1.28155	1.49551	0.774082	0.726887		10	13.5754	0.283667	-0.781475	1.64577	-0.999771	1.25452	1.85484	0.778679	1.78215	-0.526474	-1.35788	0.827213	1.79489	0.15266	0.548798	-0.361427	-1.35586	-0.0391045	0.510944	-0.400948	0.688198	-0.342377
	10	13.6061	0.25877	-0.633266	-0.398853	2.90301	0.863556	-0.952068	2.09802	-1.29628	1.05285	0.108097	-0.267403	-2.12717	-0.360394	0.852879	-0.922268	-0.0939713	0.0347252	1.41901	1.58619	0.722561	0.586159		10	13.6061	0.216461	-0.649548	1.47178	-0.992126	1.28611	1.47905	0.471287	1.61871	-0.594162	-1.41226	0.964111	1.75111	0.267612	0.286068	-0.539917	-1.35497	-0.0608482	0.497334	-0.458786	0.658863	-0.360199
	10	13.6368	0.224614	-0.825218	-0.552719	2.89908	1.18381	-0.998844	2.08025	-1.55667	0.772556	-0.0318451	-0.345421	-2.13118	-0.323536	0.867004	-1.02135	0.118351	-0.0786209	1.56319	1.51495	0.657993	0.7005		10	13.6368	0.184852	-0.886116	1.40403	-0.989365	1.3463	1.62452	0.394371	1.62515	-0.844994	-1.27768	1.24971	1.74348	0.190392	0.0857887	-0.599663	-1.31618	0.177937	0.335995	-0.247643	0.259785	-0.578793
	10	13.6676	0.251087	-0.790623	-0.417999	3.05922	1.15214	-0.892269	1.8042	-1.72569	0.643723	-0.131489	-0.114693	-2.05247	-0.0526924	1.00636	-1.03782	0.122738	-0.160339	1.36158	1.72247	0.816185	0.709229		10	13.6676	0.106172	-1.08747	1.1495	-0.872482	1.54969	1.73136	0.255756	1.56125	-0.9189	-1.4326	0.96447	1.6287	-0.0212059	-0.104221	-0.585636	-1.65165	0.275417	0.251785	-0.141056	0.330727	-0.759991
	10	13.6983	0.245559	-0.82653	-0.372524	2.90883	1.12629	-0.904003	1.52414	-1.54475	0.781185	-0.317265	-0.111691	-1.84886	-0.288536	1.06873	-1.11958	0.0790024	-0.0295296	1.53651	1.62455	0.823895	0.801319		10	13.6983	0.0720871	-1.11576	1.07406	-0.729095	1.43162	1.53849	0.23653	1.64952	-0.917854	-1.52879	0.849609	1.72819	-0.0137672	-0.475952	-0.602825	-1.5854	0.396152	0.297512	-0.208851	0.214676	-0.796326
	10	13.729	0.280567	-0.620121	-0.11919	2.80079	1.16161	-0.770512	1.4584	-1.48216	0.570087	-0.413242	-0.0710144	-2.03086	0.485859	1.0006	-1.07598	-0.00711441	0.149166	1.28131	1.38342	1.07632	0.833961		10	13.729	-0.0269167	-1.04766	0.685608	-0.580585	1.11576	1.64227	0.348549	1.32169	-1.43305	-1.39644	0.791435	1.4399	0.0204697	-0.636551	-0.447742	-1.71051	0.439556	0.0401077	-0.498276	0.213261	-0.846123
	10	13.7597	0.26528	-0.582581	-0.00485992	2.65582	1.1709	-0.792984	1.22246	-1.51811	0.309364	-0.396946	-0.221302	-2.04763	0.57869	1.33533	-0.881618	-0.053463	0.121174	1.29937	1.35072	1.1659	0.59536		10	13.7597	-0.046917	-1.1968	1.05049	-0.416801	1.23849	1.39351	0.112583	1.05689	-1.47933	-1.53262	0.865456	1.6049	-0.00382614	-0.829586	-0.418575	-1.91321	0.567959	0.0469856	-0.375389	0.0890045	-0.79847
	10	13.7904	0.261567	-0.603191	0.33279	2.89391	1.10152	-0.639633	0.853184	-1.38371	0.3717	-0.655796	0.0962486	-2.17029	0.527985	1.65709	-0.760357	-0.329884	0.122139	1.18505	1.28402	0.941525	0.407047		10	13.7904	-0.0371725	-1.19236	0.838253	-0.578819	0.969196	1.68692	0.110001	1.18602	-1.47928	-1.46173	0.668926	1.70478	0.283875	-0.926537	-0.403221	-2.02145	0.690918	0.0547447	-0.0278549	0.142162	-0.987991
	10	13.8212	0.297067	0.0977821	0.307446	2.82583	1.43505	-0.458065	1.0564	-1.87065	0.332539	-0.340416	0.0433769	-2.38736	0.594425	1.73529	-1.01653	-0.25116	0.281918	1.15918	1.16858	0.795643	0.432068		10	13.8212	-0.0960287	-1.2971	0.847095	-0.643883	0.862637	1.28185	-0.0698051	1.22752	-1.45023	-1.42155	0.155132	1.40183	0.230087	-0.78965	-0.259502	-2.09179	0.761395	0.333683	0.32925	-0.321648	-1.00591
	10	13.8519	0.255325	-0.712246	0.264412	2.81914	1.74348	-0.225117	0.77496	-1.69438	-0.000400543	-0.48008	0.332188	-2.17719	0.391102	1.85126	-0.999229	-0.698376	0.327454	1.17741	1.12148	0.873192	0.41745		10	13.8519	-0.11238	-1.29075	0.50592	-0.794685	0.860928	1.47873	-0.243755	1.11407	-1.56574	-1.2625	0.275608	1.28199	0.152779	-0.575554	-0.462048	-1.75824	0.663849	0.422817	0.370399	-0.365528	-1.05591
	10	13.8826	0.323108	-0.668686	0.347706	2.70068	1.67649	0.206417	0.879086	-1.44991	-0.0294304	-0.30117	0.368484	-2.13837	0.557014	1.88453	-1.16506	-0.527962	0.293823	1.08997	1.22939	1.00454	0.504642		10	13.8826	-0.120376	-0.989128	0.777195	-0.890385	0.864574	1.34074	-0.313599	1.13519	-1.67169	-1.37419	0.27042	1.46738	-0.085186	-0.716766	-0.422447	-1.66652	0.858383	0.469357	0.188988	-0.359509	-1.29032
	10	13.9133	0.304245	-0.599667	0.375793	2.64952	1.6693	0.583706	0.298504	-1.3539	-0.331005	-0.590508	0.418259	-2.28746	0.673054	1.89223	-0.795025	-0.466141	0.387371	1.16985	0.956337	1.118	0.316689		10	13.9133	-0.158065	-0.765564	0.460232	-0.899456	0.93483	1.09259	-0.327663	1.14066	-1.8608	-1.15468	0.218063	1.25884	-0.220966	-0.687977	-0.520889	-1.74169	0.816994	0.437038	0.294037	-0.145981	-1.48891
	10	13.944	0.376274	-0.558212	0.206921	2.7564	2.01092	0.564655	0.715412	-1.38457	-0.540119	-0.655392	0.415047	-2.31583	0.632	2.16534	-0.807533	-0.255562	0.428425	1.12189	1.0735	1.20127	0.750927		10	13.944	-0.184909	-1.00882	0.381729	-0.453518	0.605438	1.14299	-0.468067	1.18789	-1.69713	-1.31633	-0.218418	1.29236	-0.202881	-0.413292	-0.627655	-1.84284	0.844688	0.548679	0.395649	-0.324245	-1.5244
	10	13.9748	0.304157	-0.381798	0.133141	2.46817	1.90067	0.608513	0.327049	-1.32767	-0.775116	-0.668041	0.518322	-2.48937	0.77145	2.19563	-0.584499	-0.0756607	0.162876	1.01081	0.788437	1.00474	0.495476		10	13.9748	-0.173586	-0.933266	0.206417	-0.369286	0.561371	1.52068	-0.594883	1.49221	-1.87583	-1.49112	-0.333099	1.12971	-0.0971642	-0.333519	-0.41452	-1.92301	0.65704	0.635067	0.44923	-0.349743	-1.40801
	10	14.0055	0.350156	-0.178642	0.262615	2.54938	1.99677	0.65181	0.402298	-1.51233	-0.747341	-0.607365	0.531658	-2.40833	0.656399	2.35319	-0.866646	0.0887146	0.623127	0.918617	0.824207	0.919872	0.545116		10	14.0055	-0.169987	-0.962044	0.119888	-0.117107	0.342548	1.54068	-1.12331	1.35099	-2.06971	-1.19978	-0.426838	1.02684	0.162457	-0.27314	-0.203403	-1.76564	0.496052	0.806538	0.637558	-0.229126	-1.51319
	10	14.0362	0.332306	-0.124519	0.102421	2.50003	1.68557	0.85804	0.14637	-1.45559	-0.79636	-0.572052	0.706585	-2.43876	0.549896	2.34601	-0.70866	0.262764	0.509758	0.853802	0.562542	1.08674	0.571541		10	14.0362	-0.124476	-0.789715	0.0957832	-0.26302	0.162567	1.73816	-0.766727	1.16991	-2.24644	-1.10822	-0.463131	1.14426	-0.0432243	-0.150261	-0.0606842	-1.59072	0.304409	0.9939	0.675514	-0.0475616	-1.24432
	10	14.0669	0.368115	-0.128429	-0.0884323	2.54045	1.98172	0.656208	0.237503	-1.42987	-0.860374	-0.210358	0.809608	-2.0948	0.68314	2.26349	-0.985138	0.191307	0.558552	0.807037	0.830708	0.747044	0.852936		10	14.0669	-0.174141	-0.96624	0.0839653	-0.244545	0.246475	1.68811	-1.12655	1.17669	-2.1338	-1.26997	-0.667019	1.2751	0.0882607	0.13755	-0.476345	-1.60519	0.41011	0.892559	0.693218	-0.26395	-1.42125
	10	14.0976	0.369541	-0.0457344	0.060318	2.40381	1.94308	0.755489	0.0783081	-1.49559	-1.04863	-0.441528	1.10398	-2.35978	0.862263	2.51467	-0.880901	0.302197	0.416363	0.779263	0.670071	0.91621	0.856968		10	14.0976	-0.216931	-0.800381	-0.15036	-0.203773	0.14727	1.57098	-0.897858	1.208	-2.25743	-1.41939	-0.817245	1.17811	0.0757446	0.256378	-0.453861	-1.68109	0.251266	0.82933	0.288918	-0.281044	-1.18218
	10	14.1284	0.36789	-0.107044	0.455971	2.01928	1.90471	0.463436	0.121094	-1.01884	-1.07497	-0.363113	0.998878	-2.04019	0.940498	2.55026	-1.26118	-0.0995026	0.168606	0.853722	0.718994	0.956173	1.17101		10	14.1284	-0.208131	-0.878796	0.00110626	-0.0372849	0.108337	1.42324	-1.12007	1.26229	-2.48898	-1.2243	-1.06337	1.07707	0.516415	0.257603	-0.310795	-1.77959	0.182076	1.1347	0.546291	-0.412128	-1.35642
	10	14.1591	0.329119	-0.0205078	0.34866	2.00403	1.79563	0.407883	-0.276981	-1.20433	-1.25864	-0.485126	0.802898	-2.21942	0.83556	2.74529	-0.999386	0.265255	0.139629	1.07326	0.449951	1.05613	1.1226		10	14.1591	-0.122373	-0.757385	0.330746	0.0646248	0.00416946	1.57059	-1.04291	1.41304	-2.30944	-1.26505	-1.00014	1.37925	0.63126	0.48502	-0.358376	-1.54022	-0.0311165	0.998909	0.504749	-0.328381	-1.1968
	10	14.1898	0.379834	0.104473	0.496464	2.07601	2.16626	0.433109	-0.44297	-1.37947	-1.35136	-0.557297	0.853416	-2.04889	0.834164	2.65467	-1.1744	0.391739	0.33482	1.24111	0.690804	1.18193	1.09209		10	14.1898	-0.131783	-0.824188	0.00618362	0.18536	0.228039	1.50846	-1.32329	1.25586	-2.27328	-1.31847	-1.02446	1.47659	0.307487	0.846138	-0.623497	-1.67452	0.0774918	1.20894	0.914433	-0.140018	-1.44891
	10	14.2205	0.319449	-0.188633	0.386196	2.14989	2.16812	0.349152	-0.71685	-1.45441	-1.31913	-0.556175	1.08679	-2.33345	0.695992	2.52605	-1.11086	0.337791	0.390766	1.15945	0.205032	1.33399	1.27926		10	14.2205	-0.142782	-0.7257	0.0989532	-0.119125	0.277912	1.45198	-1.30609	1.22899	-2.28922	-1.46562	-1.09835	1.80151	0.152348	0.727707	-0.678104	-1.92196	0.332623	1.15928	0.980633	-0.338573	-1.12484
	10	14.2512	0.2906	-0.101475	0.444061	2.048	2.1729	0.092968	-0.689087	-1.54912	-0.933987	-0.668861	0.791557	-1.98585	0.913689	2.25748	-1.10026	0.428104	-0.118748	1.10923	0.00537109	1.45705	1.23897		10	14.2512	-0.144274	-0.875221	-0.122669	0.0851669	0.0787621	1.45088	-1.4173	1.29325	-2.46043	-1.65564	-1.22383	1.84643	0.171707	0.969082	-0.384682	-1.76116	0.5107	1.01058	1.03337	-0.0799255	-1.35455
	10	14.282	0.292514	-0.242847	0.539917	1.90398	2.12203	0.223942	-0.656784	-1.433	-1.22763	-0.80674	0.838146	-1.96159	0.455959	2.24358	-1.24231	0.746609	0.180981	1.19891	-0.0890808	1.43565	1.62056		10	14.282	-0.175277	-0.695381	-0.238148	0.112347	-0.269939	1.2145	-1.2479	0.972462	-2.50981	-1.8319	-1.09663	1.89499	0.387875	1.02668	-0.456352	-1.5731	0.281269	0.93576	0.950268	-0.00680161	-1.35572
	10	14.3127	0.301706	-0.24509	0.694424	1.8192	2.37868	0.0990257	-0.79652	-1.30619	-1.3785	-0.454205	0.928902	-1.85249	0.684128	2.38277	-1.26828	0.68536	-0.0565567	0.773312	-0.109512	1.46462	1.59103		10	14.3127	-0.176458	-0.273521	-0.428585	0.123608	0.0219078	1.17396	-1.63769	0.983242	-2.60688	-1.48043	-1.14989	1.9123	0.398373	0.840286	-0.465805	-1.72766	0.25869	0.920479	1.09591	-0.124237	-1.3632
	10	14.3434	0.329618	-0.0723534	0.661976	1.99061	2.034	0.233231	-0.462448	-1.54828	-1.44939	-0.641396	1.04689	-2.08253	0.813484	2.27888	-1.37333	0.921703	-0.221424	1.06647	0.00986481	1.59976	1.78663		10	14.3434	-0.197814	-0.571205	-0.463799	0.114754	0.111935	1.38957	-1.89125	0.83522	-2.29089	-1.44424	-1.33772	1.96755	0.388382	0.5168	-0.295956	-1.41565	0.270756	0.844913	1.0862	-0.253986	-1.51766
	10	14.3741	0.353403	0.0187454	0.958233	1.8517	2.0079	0.0472908	-0.399754	-1.3987	-1.30648	-0.51432	0.936874	-1.85139	1.02465	2.3015	-1.30254	0.860275	-0.338402	0.879185	-0.104149	1.63804	1.75941		10	14.3741	-0.180148	-0.687157	-0.506046	0.100853	-0.102482	1.42264	-2.06235	1.03328	-2.6152	-1.63991	-1.21761	2.00527	0.404705	0.880962	-0.342804	-1.63766	0.299435	0.956051	1.14198	0.199955	-1.23685
	10	14.4049	0.38548	0.192505	0.89658	1.89781	1.95531	0.187408	-0.37999	-1.09417	-1.19243	-0.616638	0.90395	-1.69164	0.988579	2.16704	-1.5411	0.892426	-0.185253	0.929207	0.0366859	1.61497	1.74837		10	14.4049	-0.168504	-0.868584	-0.596958	0.0656738	0.0399094	1.10284	-1.90881	0.987141	-2.618	-1.50249	-1.16585	2.3835	0.1917	0.797165	-0.0595245	-1.53652	0.469322	0.957256	1.01656	0.0540504	-1.17846
	10	14.4356	0.368757	0.366852	1.14069	1.49324	1.88535	-0.33429	-0.280201	-0.665386	-1.42027	-0.798527	0.804089	-1.64837	1.08748	2.15772	-1.37428	1.02014	-0.203075	0.881927	-0.365883	1.78062	1.84732		10	14.4356	-0.251931	-0.715385	-0.739109	-0.0837555	-0.126156	1.03392	-2.29687	0.817776	-2.82592	-1.52301	-1.24781	2.50475	0.100437	0.602665	-0.0776939	-1.67094	0.316975	0.951462	1.05621	-0.0148048	-1.10136
	10	14.4663	0.372874	0.414177	1.13809	1.48054	1.72403	-0.131969	-0.317917	-0.789604	-1.49073	-0.595856	0.887154	-1.41416	1.16893	2.00042	-1.56805	0.743404	-0.139488	0.940681	-0.599129	2.13694	1.87002		10	14.4663	-0.293057	-0.82357	-0.721325	-0.0427475	-0.369534	0.889439	-2.28626	0.750328	-2.68414	-1.78849	-1.37563	2.51427	0.177334	0.310173	-0.0986519	-1.6257	0.211521	1.11852	1.25639	-0.219986	-1.05307
	10	14.497	0.345428	0.117737	1.03733	1.6254	1.61623	-0.168949	-0.228535	-0.410789	-1.40725	-0.817101	0.702698	-1.36609	1.18928	1.99742	-1.55746	0.684967	-0.364262	0.882557	-0.605263	2.16771	1.81294		10	14.497	-0.242793	-0.52552	-0.819664	-0.0982971	-0.254608	1.11765	-2.1805	0.725914	-2.78543	-1.67171	-1.23947	2.4747	0.324535	0.160328	0.132446	-1.43489	0.374409	0.926594	1.12164	-0.256378	-0.947617
	10	14.5277	0.332028	0.145599	0.944073	1.57425	1.42902	-0.423008	0.0890121	-0.108036	-1.0447	-0.898052	0.877792	-1.28591	1.23507	2.0485	-2.4511	0.561253	-0.38121	0.696064	-0.325909	2.22018	1.73766		10	14.5277	-0.228219	-0.474201	-0.775707	-0.230713	-0.19207	1.06954	-2.13683	0.641918	-2.81973	-1.67313	-1.13105	2.60328	0.198185	0.260048	0.0148621	-1.301	0.518009	0.949581	1.28359	-0.192982	-1.17598
	10	14.5584	0.334905	0.12669	1.06199	1.42161	1.50035	-0.459682	-0.365421	-0.232468	-0.900715	-0.636761	0.693665	-1.11064	1.3258	2.39381	-1.79509	0.586861	-0.357857	0.20768	-0.555553	2.29873	1.49509		10	14.5584	-0.277344	-0.427444	-0.947941	-0.365326	-0.623085	0.932728	-2.40589	0.725605	-2.78445	-1.6912	-1.1885	2.51608	0.0440025	0.0691071	0.125473	-1.19617	0.470787	1.04767	1.1629	0.0493698	-1.06061
	10	14.5892	0.416836	0.0279236	1.01003	1.49439	1.14241	-0.633648	0.200882	0.0551147	-0.36338	-0.602676	0.658894	-0.853531	1.41943	2.29338	-1.48546	0.529018	-0.379814	0.554672	-0.897709	2.54005	1.62674		10	14.5892	-0.245582	-0.442013	-0.643387	-0.179001	-0.496635	1.01602	-2.65174	0.775066	-2.65271	-1.69519	-1.29926	2.48529	0.200165	0.00122833	0.0968857	-0.895069	0.496742	1.15615	1.05651	0.0165634	-1.25725
	10	14.6199	0.33068	0.0442696	1.16693	1.03159	0.767315	-0.932339	0.204063	0.12645	-0.587757	-0.706963	0.363087	-0.988247	1.85071	2.4202	-1.13858	0.491875	-0.432316	0.590897	-0.980217	2.28997	1.03267		10	14.6199	-0.262593	-0.701843	-0.699665	-0.014637	-0.365818	1.12087	-2.37234	0.817253	-2.69762	-1.49441	-1.29935	2.28945	-0.0805702	-0.230392	0.197609	-0.746616	0.413628	1.07082	0.79052	0.00782394	-1.25657
	10	14.6506	0.366884	0.324413	1.33265	1.54642	0.783455	-1.0331	0.256336	0.350777	-0.55669	-0.859764	0.620937	-0.724438	1.68142	2.4967	-1.39156	0.259583	-0.270786	0.223068	-0.987999	2.35516	0.931099		10	14.6506	-0.220134	-0.619888	-0.586521	0.108959	-0.298618	1.12303	-2.09641	0.813095	-2.49905	-1.54881	-1.53444	2.48663	0.0372543	-0.174065	0.0752869	-0.901432	0.46447	1.03913	0.728539	0.060276	-1.08012
	10	14.6813	0.348241	0.0738678	1.54424	1.63	0.741756	-1.21621	0.299442	0.50148	-0.621788	-0.745228	0.573788	-0.526371	1.6949	2.45768	-1.22933	0.249783	-0.609219	0.0329437	-0.952045	1.96915	1.09598		10	14.6813	-0.2477	-0.725254	-0.321369	0.152878	-0.459969	1.03316	-2.1003	0.699512	-2.71412	-1.67121	-1.25014	2.46251	-0.0921021	-0.521217	0.276463	-0.822159	0.099514	0.862988	0.686531	0.288681	-0.838398
	10	14.7121	0.419181	-0.0931778	1.69273	1.71313	0.734818	-0.953281	0.422798	0.798805	-0.329868	-0.548412	0.586472	-0.502659	1.89376	2.4615	-1.0928	0.291729	-0.585068	-0.00820923	-1.23235	1.87825	1.25545		10	14.7121	-0.249387	-0.819733	-0.588848	0.385986	-0.574623	1.42282	-2.14662	0.554539	-2.57084	-2.04767	-1.38765	2.41472	0.220371	-0.584026	0.208729	-0.631973	0.0259209	0.96542	0.695889	0.401619	-0.93177
	10	14.7428	0.367504	-0.418346	1.81446	1.34113	0.710117	-0.973133	0.331856	1.14949	-0.478119	-0.522797	0.49958	-0.493122	2.01406	2.2336	-0.757019	-0.014946	-0.553753	-0.245949	-1.28136	1.97347	1.02085		10	14.7428	-0.203562	-0.988804	-0.541103	0.17989	-0.717079	1.42038	-1.69233	0.810066	-2.81014	-1.86483	-0.926395	2.5867	0.109043	-0.686115	0.336914	-0.63612	0.274925	1.13641	0.53294	0.300266	-0.895855
	10	14.7735	0.46218	-0.135727	1.93517	1.62557	0.581219	-1.16003	0.47921	1.30401	-0.338085	-0.21508	0.874329	-0.490643	2.10508	2.38889	-1.13734	0.196472	-0.291504	-0.286125	-1.29289	2.12925	0.971813		10	14.7735	-0.191198	-0.859486	-0.526058	0.123013	-0.549435	1.49302	-1.58117	0.728168	-2.51137	-1.70998	-1.13113	2.78989	0.105667	-0.784191	0.392849	-0.794384	0.235016	1.09819	0.291508	0.416035	-1.05011
	10	14.8042	0.406709	0.00374985	1.90382	1.37503	0.366199	-1.24287	0.619041	1.6899	-0.170597	-0.25425	0.550423	-0.418476	2.18073	2.29285	-0.863354	-0.0221939	-0.392307	-0.26395	-1.66804	1.62569	0.822762		10	14.8042	-0.223157	-1.0563	-0.68684	0.0749702	-0.64925	1.7595	-1.71169	1.07076	-2.49986	-1.79333	-1.13561	2.66752	0.274349	-0.953144	0.467411	-0.80143	0.14196	0.943619	0.168434	0.431698	-1.17593
	10	14.8349	0.419567	0.0496674	1.88931	1.63752	0.208618	-1.13681	0.482635	1.60558	0.11615	-0.365738	0.758671	-0.429958	2.57246	2.11721	-1.02018	-0.175125	-0.667583	-0.172806	-1.43936	1.54441	0.816658		10	14.8349	-0.215424	-1.12958	-0.656059	-0.174393	-0.575092	1.9123	-1.73782	0.902763	-2.50183	-1.89947	-1.06693	2.33044	0.680065	-0.884899	0.689133	-0.885448	0.150486	0.976757	0.437714	0.650829	-1.52745
	10	14.8657	0.401504	-0.24995	2.04502	1.42875	0.305534	-1.1985	0.799026	1.72598	0.0643578	-0.309826	0.846512	-0.516773	2.45919	1.75631	-1.03809	-0.232506	-0.592365	-0.147469	-1.28947	1.54998	0.624374		10	14.8657	-0.157164	-1.078	-0.400261	-0.205826	-0.528862	1.9752	-1.37461	1.09662	-2.44452	-1.88203	-1.10278	2.2098	0.438854	-1.00786	0.898972	-0.5504	0.400906	1.03413	0.352936	0.832821	-1.80839
	10	14.8964	0.398	0.0876503	2.38529	1.29824	0.449001	-1.37471	0.676754	1.62455	0.289207	-0.468842	0.887966	-0.586906	2.32558	2.11132	-1.2045	-0.429401	-0.872593	-0.105976	-1.49775	1.62962	0.735493		10	14.8964	-0.107574	-1.07045	-0.600445	-0.318253	-0.331699	2.04358	-1.23077	0.965382	-2.04688	-1.87372	-0.965446	2.29595	0.44241	-1.05759	0.927383	-0.646172	0.308231	1.06502	0.457672	0.94817	-1.46385
	10	14.9271	0.447912	0.0734367	2.39639	1.35121	0.399769	-1.22686	0.626003	2.05509	0.220364	-0.113312	0.678547	-0.532032	2.2776	1.88414	-0.930626	-0.513172	-0.489429	-0.0375977	-1.13099	1.29458	0.675148		10	14.9271	-0.155788	-1.19217	-0.506287	-0.347008	-0.200058	1.9688	-1.26884	0.95401	-1.82461	-1.87247	-0.767712	2.1784	0.808681	-1.47602	0.468857	-0.807461	0.617714	0.832851	0.0684662	0.959366	-1.71027
	10	14.9578	0.380997	0.258213	2.1892	1.43208	0.173119	-1.28019	0.726547	2.18633	0.0359383	-0.222103	0.329304	-0.413506	2.4607	1.87374	-1.41492	-0.471996	-0.837711	0.0329056	-1.32018	1.03938	0.84309		10	14.9578	-0.115497	-1.23104	-0.814903	-0.0903244	-0.298439	2.00331	-0.984554	1.06372	-1.76027	-1.70698	-0.64922	2.02288	0.928352	-1.49995	0.944584	-0.890385	0.28513	0.490292	0.376751	1.13968	-1.63859
	10	14.9885	0.430002	0.287132	2.35427	1.43866	0.400211	-1.10315	0.621895	2.1995	0.0611687	0.176964	0.436996	-0.381008	2.24176	1.60403	-1.48734	-0.607117	-0.468769	0.15564	-1.02865	0.987656	0.710182		10	14.9885	-0.0807533	-1.38304	-0.732403	-0.124928	-0.464901	1.81006	-0.893208	1.3637	-1.56655	-1.82171	-0.4767	1.95503	0.960541	-1.76653	1.56806	-1.00435	0.233776	0.61689	0.364059	1.28069	-1.53356
	10	15.0193	0.485133	0.646786	2.4191	1.61438	0.614727	-1.27399	0.532352	1.99029	0.0323372	0.152729	0.279102	-0.185246	2.32256	1.60424	-1.13789	-0.91909	-0.449886	0.297585	-0.884205	1.14504	0.901752		10	15.0193	-0.0483032	-1.47469	-0.741604	0.0550537	-0.51862	1.79707	-0.541691	1.17892	-1.29739	-1.5737	-0.342087	2.05923	0.756348	-1.61347	1.56328	-1.09221	0.229877	0.420444	0.423889	1.42832	-1.68304
	10	15.05	0.510107	0.910778	2.49989	1.49865	0.698975	-1.25909	0.45953	2.65356	-0.0781212	0.00338364	0.357174	-0.501278	2.19548	1.55367	-0.827614	-0.89991	-0.160316	0.322571	-1.0351	1.04117	0.768753		10	15.05	-0.0984524	-1.59729	-0.727238	0.157597	-0.513603	1.97817	-0.719147	1.16878	-1.51492	-1.68873	-0.678463	2.17264	0.677155	-1.99855	1.67955	-1.02218	0.521702	0.172035	0.189522	1.55904	-1.78509
	10	15.0807	0.481436	1.01101	2.42953	1.54996	0.900829	-1.37339	0.539566	2.30597	-0.162251	0.0187378	0.35677	-0.701134	2.18792	1.48812	-0.948818	-0.958332	-0.260975	0.265282	-0.743038	0.946766	0.776199		10	15.0807	-0.0584705	-1.21671	-0.883305	0.0271683	-0.505711	1.89523	-0.66161	0.867058	-1.66043	-1.22108	-0.469284	2.23081	0.723339	-1.89103	1.67698	-1.05423	0.537655	0.134689	0.526241	1.6331	-1.8583
	10	15.1114	0.450943	0.827152	2.36022	1.31914	0.968079	-1.20764	0.538338	2.22654	-0.394661	0.138115	0.385139	-0.597542	2.01753	0.859161	-0.887936	-0.867302	-0.262653	0.421898	-0.513512	0.831932	0.856857		10	15.1114	-0.107767	-1.46261	-0.608685	-0.28207	-0.451496	1.72311	-0.770683	0.817276	-1.51514	-1.21957	-0.585464	2.19382	0.530575	-2.07541	1.79191	-0.996731	0.517708	0.223545	0.355927	1.51873	-1.86009
	10	15.1421	0.435624	1.25386	2.12047	1.27409	0.904072	-1.54458	0.390102	2.09932	-0.325413	0.261971	0.0700073	-0.501469	2.05634	0.922569	-0.943932	-0.769279	-0.193314	0.390533	-0.592964	0.61256	1.22754		10	15.1421	-0.0849978	-1.34385	-0.525715	0.0443115	-0.60532	1.51511	-0.323437	0.810474	-1.85119	-1.16593	-0.358646	2.11587	0.375721	-2.32875	1.63811	-1.27341	0.693302	0.162903	0.368755	1.9287	-1.57697
	10	15.1729	0.477628	1.5816	2.07284	1.32773	1.09978	-1.60612	0.471046	2.21594	-0.659435	0.31591	0.058876	-0.631763	1.99766	0.755615	-0.998768	-0.631245	0.0511513	0.287811	-0.222069	0.48217	1.58382		10	15.1729	-0.113725	-1.4652	-0.708691	0.183475	-0.477409	1.41436	-0.422737	1.02114	-1.78613	-1.12063	-0.440578	2.1371	0.682438	-2.43229	1.54866	-1.18022	0.505398	0.054554	0.164154	1.60107	-1.55297
	10	15.2036	0.496522	1.67566	2.03979	1.35639	1.28146	-1.69184	0.503853	2.32259	-0.678402	0.406464	-0.190308	-0.741428	1.71729	0.935905	-1.12149	-0.209457	0.196968	0.365967	-0.0445404	0.438137	1.36743		10	15.2036	-0.15299	-1.56794	-0.421799	-0.00390625	-0.474003	1.25364	-0.190395	0.623608	-1.72646	-0.995365	-0.462154	1.98171	0.22353	-2.17968	1.65971	-1.35799	0.247414	-0.213047	0.345234	1.80148	-1.6034
	10	15.2343	0.512414	1.66809	2.11205	0.85215	1.28137	-1.92279	0.559261	2.2617	-0.552589	0.625259	0.0499001	-0.969284	2.00764	1.21848	-1.0264	-0.40934	0.0871162	0.572174	0.227486	0.379414	1.22659		10	15.2343	-0.127965	-1.5545	-0.153244	0.214779	-0.37458	1.23212	0.0903168	0.461929	-1.8344	-1.01475	-0.306458	1.90787	0.485466	-2.24584	1.46202	-1.57572	0.320965	0.0795898	0.269272	1.64363	-1.66777
	10	15.265	0.509331	1.75977	1.89162	1.07986	1.24665	-2.12029	0.416424	1.96626	-0.49139	0.933273	-0.301384	-0.711849	2.05611	1.41579	-1.16413	-0.140831	0.0892601	0.679054	0.27047	0.0315018	1.28045		10	15.265	-0.132773	-1.5529	0.0499229	0.238598	-0.51725	1.09768	0.152328	0.590874	-2.02233	-0.890102	-0.442787	1.74471	0.366352	-2.16692	1.70842	-1.34472	0.384907	0.0120468	-0.217659	1.56157	-1.4082
	10	15.2957	0.533477	1.79094	1.9396	0.835926	1.1087	-2.06907	0.422798	1.77111	-0.462261	0.793274	-0.0563049	-0.693455	2.02529	1.34087	-1.05515	0.0631027	0.361168	0.838448	0.331245	-0.162777	1.54609		10	15.2957	-0.0611273	-1.51015	0.17358	0.414207	-0.673447	1.09572	0.0624924	0.680927	-1.97652	-0.428761	-0.876492	1.99633	0.750984	-2.08916	1.7382	-1.5545	0.610264	0.291599	-0.373672	1.85737	-1.41151
	10	15.3265	0.527873	1.95642	2.09871	0.460667	1.33503	-2.25257	0.481441	1.7411	-0.416271	0.538788	-0.294201	-0.566525	1.55936	1.49802	-0.814003	0.264038	0.462574	0.936478	0.296364	-0.379627	1.65167		10	15.3265	-0.094986	-1.48301	0.341354	0.399818	-0.696995	0.845322	0.174637	0.442364	-2.11959	-0.550499	-0.552086	1.96879	0.339413	-1.96111	1.66264	-1.41626	0.650738	0.047699	-0.519066	1.99208	-1.46596
	10	15.3572	0.52222	2.14371	1.89465	0.419731	1.26203	-2.10394	0.580982	1.43204	-0.488575	0.475105	-0.530338	-0.607586	1.53316	1.81313	-0.906929	0.228039	0.374264	0.902954	0.324593	-0.267227	1.96461		10	15.3572	-0.0954838	-1.58416	0.504383	0.756123	-0.728153	0.802296	0.0410957	0.424244	-2.16135	-0.719536	-0.707966	1.77841	0.271263	-1.62493	1.73837	-1.64135	0.642128	0.146095	-0.67868	2.12001	-1.28797
	10	15.3879	0.464122	2.20972	1.74226	0.431732	0.781158	-2.53885	0.521828	1.171	-0.538773	0.581963	-0.287914	-0.815845	1.31121	1.76924	-0.841362	0.396301	0.414318	1.02269	0.500259	-0.424328	1.87585		10	15.3879	-0.0764935	-1.36378	0.515816	0.690758	-0.560715	0.853405	-0.0743446	0.291039	-2.25432	-0.544991	-0.679424	1.88534	-0.0416603	-1.64213	1.57033	-1.61369	0.883884	0.36388	-0.553581	1.79724	-1.05294
	10	15.4186	0.567922	2.05742	1.40596	0.511143	1.0034	-2.20595	0.659454	1.44728	-0.452	0.744659	0.0557022	-0.915577	1.88912	1.52253	-0.816162	0.788429	0.400673	1.18153	0.51318	-0.485592	2.05326		10	15.4186	-0.0740244	-1.60271	0.437748	0.790562	-0.512039	0.92091	-0.177616	0.333874	-2.3309	-0.232769	-0.726051	1.58622	0.100388	-1.49471	1.62503	-1.62391	1.04378	0.251858	-0.649719	1.95928	-1.17972
	10	15.4493	0.476245	2.04894	1.34302	0.457355	1.04257	-2.55402	0.514248	1.21843	-0.808517	0.662407	0.0400772	-0.669926	1.67583	1.59069	-0.821075	0.880352	0.564358	1.00896	0.170822	-0.719505	1.87988		10	15.4493	-0.104528	-1.7239	0.647343	0.589447	-0.508606	1.00648	0.0154076	0.464153	-2.36336	-0.310291	-1.0295	1.70789	-0.320652	-1.40911	1.38694	-1.58138	1.13211	0.157539	-0.840527	1.7039	-0.814461
	10	15.4801	0.497501	1.8387	1.28096	0.320381	0.85107	-1.73563	0.650337	0.853222	-0.43351	0.897026	0.330612	-0.482502	1.4423	1.86878	-0.741951	0.836182	0.484726	0.811363	0.0475845	-0.683434	1.51381		10	15.4801	-0.0932547	-1.36113	0.649662	0.688972	-0.525261	1.08249	-0.043438	0.481026	-2.27177	-0.362648	-1.16275	1.53332	-0.0258064	-1.43665	1.13055	-1.49696	1.13233	0.109917	-0.946911	1.66094	-0.700974
	10	15.5108	0.515324	1.702	1.03366	0.132114	1.04669	-2.30916	1.11087	0.930588	-0.637966	0.807091	0.0899315	-0.434391	1.71933	1.85957	-0.657196	1.11673	0.733337	0.885845	0.191399	-0.848751	1.8348		10	15.5108	-0.0789896	-1.33329	0.903221	0.477303	-0.526798	0.986633	-0.0963745	0.742603	-2.32579	-0.53896	-0.982075	1.51838	-0.245167	-1.35246	0.889	-1.16121	1.48441	0.0800438	-0.924774	1.35226	-0.52676
	10	15.5415	0.453257	1.49639	1.00498	0.0069313	1.01093	-2.79311	1.04205	0.72562	-0.427216	0.672585	0.234459	-0.438694	1.91977	2.05848	-0.692886	1.03582	0.757133	0.710075	0.0471039	-1.07969	1.77441		10	15.5415	-0.0652166	-1.394	0.682865	0.564079	-0.42057	1.17937	-0.255558	0.667717	-2.21793	-0.654148	-1.04784	1.56338	-0.412205	-0.950569	0.64682	-1.41098	1.81424	-0.0818443	-0.87505	1.56436	-0.266479
	10	15.5722	0.504272	1.77043	0.954411	0.045208	1.21165	-2.83808	1.08744	0.809757	-0.377232	0.749752	0.474213	-0.47567	1.63773	1.93974	-0.613609	0.999802	0.897942	1.06153	0.28363	-1.10605	1.57283		10	15.5722	-0.0863613	-1.59024	0.715992	0.541344	-0.414112	0.952145	-0.190876	0.416256	-2.2474	-0.728382	-1.08256	1.59837	-0.354744	-0.720081	0.764019	-1.24923	1.74314	-0.0208092	-1.04232	1.37593	-0.193676
	10	15.6029	0.456075	1.7221	0.916718	0.0206032	0.907288	-3.02209	0.84306	0.613579	-0.313694	0.505157	0.450348	-0.602222	1.78239	1.96591	-0.403076	1.17965	0.75227	0.984756	0.480408	-1.25264	1.59099		10	15.6029	-0.057872	-1.34531	0.716873	0.41317	-0.625	0.710552	-0.388451	0.403015	-2.33092	-0.635883	-0.923058	1.36112	0.268757	-0.506325	0.654537	-1.20537	1.90377	0.0142174	-1.02584	1.51135	-0.128647
	10	15.6337	0.429976	1.50182	0.845272	0.0030098	0.643551	-3.24992	0.963821	0.359028	0.00981522	0.559456	0.615669	-0.652973	1.67284	1.67617	-0.469002	1.35067	0.91959	1.10223	0.6175	-1.55481	1.68578		10	15.6337	-0.0444736	-0.981808	0.950954	0.334026	-0.604069	0.61179	-0.48737	0.56255	-2.06461	-0.676693	-0.989025	1.27699	0.0354881	-0.470013	0.476273	-1.12173	2.09567	-0.293465	-1.03893	1.39358	0.100914
	10	15.6644	0.395111	1.58489	0.448223	0.0327415	0.553204	-3.08804	0.89188	0.424416	0.169571	0.299866	0.517509	-0.751163	1.87741	1.64233	-0.227482	1.43026	0.728367	1.07226	0.288002	-1.57617	1.58414		10	15.6644	-0.0220816	-1.25061	1.041	0.265205	-0.76128	0.724445	-0.737141	0.592426	-1.93987	-0.449417	-1.13489	1.24049	0.128212	0.187187	0.268211	-1.24205	2.18064	-0.56897	-0.871391	1.26466	0.621502
	10	15.6951	0.475608	1.16226	0.648926	-0.0236473	0.777344	-3.13337	0.780968	0.426022	0.415844	0.403114	0.710987	-0.124683	2.09692	1.63786	-0.185482	1.73666	0.679943	0.864578	0.43808	-1.45653	1.65638		10	15.6951	-0.0176775	-1.28019	1.16007	0.578957	-0.475609	0.398193	-0.722095	0.90535	-1.81413	-0.7234	-1.21942	1.24931	0.241863	0.128632	0.159222	-1.25638	2.10025	-0.425285	-1.06571	1.1676	0.539223
	10	15.7258	0.422757	0.936512	0.344162	0.187901	0.686172	-3.42873	0.862541	0.427299	0.414547	-0.0734482	1.00605	0.0434723	2.13487	1.46335	-0.154167	1.48949	0.641651	0.974194	0.368748	-1.33949	1.47001		10	15.7258	-0.0494987	-1.04817	1.12632	0.58551	-0.577	0.490604	-0.935322	0.962261	-1.9377	-1.06255	-1.1088	1.27634	0.256123	0.332035	-0.0968399	-1.28421	1.97025	-0.434933	-1.08178	0.925137	0.652744
	10	15.7565	0.45517	0.59412	0.340874	0.175648	0.716743	-3.40852	1.04355	0.425797	0.649422	-0.0441322	0.975323	-0.140095	2.05712	1.45263	0.00914001	1.75505	0.686428	0.909451	0.655548	-1.16187	1.41118		10	15.7565	-0.0316042	-0.984859	1.04202	0.725964	-0.395702	0.446575	-1.11061	0.919811	-2.00714	-0.981594	-1.15253	1.29775	0.0444145	0.59959	0.0927353	-1.15812	2.05274	-0.740498	-0.710461	0.768211	0.619617
	10	15.7873	0.391945	0.364143	0.1605	0.350971	0.565781	-3.221	0.663437	0.331299	0.716415	-0.425285	0.963291	-0.252453	1.76384	1.50172	0.151855	1.8412	0.649391	0.749447	0.546688	-1.06778	1.48542		10	15.7873	-0.0273638	-0.928627	1.19201	0.480236	-0.348293	0.465141	-0.882763	0.924389	-1.92029	-1.13046	-1.24614	1.3546	0.121044	0.855247	0.128967	-1.22222	1.935	-0.665409	-0.899155	0.695938	0.543503
	10	15.818	0.337331	-0.112179	-0.0775757	0.482124	0.663528	-3.48752	0.523785	0.541672	0.649586	-0.260544	0.88311	-0.178123	1.48428	1.52745	0.319519	1.46682	0.501499	0.873486	0.387009	-0.98682	1.54552		10	15.818	-0.066069	-1.03455	0.994774	0.575935	-0.10252	0.120007	-1.01183	0.940109	-1.62399	-1.19448	-1.36973	1.09663	0.417805	0.9599	-0.380096	-1.2583	2.38399	-0.80294	-1.13778	0.546936	0.558735
	10	15.8487	0.250093	-0.365715	-0.437382	0.464745	0.5121	-3.83474	0.429665	0.590363	0.345093	-0.263397	0.724419	-0.274921	1.29494	1.51085	0.467308	1.67877	0.37447	1.06804	0.385635	-1.16977	1.50137		10	15.8487	-0.161082	-1.07653	1.21443	0.508415	-0.0817795	0.0387764	-1.16211	0.970356	-1.68773	-1.48002	-1.08507	0.757015	0.422802	0.741997	-0.577919	-1.39819	1.6629	-0.907322	-1.28634	0.688522	0.516167
	10	15.8794	0.257841	-0.56601	-0.384041	0.767262	0.707653	-3.71614	0.330723	0.586357	0.387897	-0.0378151	0.630981	-0.292557	1.2806	1.3662	0.423439	1.50284	0.131977	1.19626	0.307091	-1.12769	1.66178		10	15.8794	-0.0904774	-1.16194	1.21923	0.525452	0.573269	0.503677	-1.39683	1.13313	-1.75451	-1.55914	-1.30213	1.13162	0.618614	1.02352	-0.12458	-1.67972	1.46193	-0.757877	-1.36335	0.709576	0.390499
	10	15.9101	0.158569	-0.917866	-0.752659	0.668842	0.630653	-3.50114	0.27832	0.483044	0.501793	-0.243759	0.354252	-0.284508	1.06223	1.58587	0.171581	1.45521	-0.0436211	1.25045	0.154526	-1.15011	1.46827		10	15.9101	-0.0944336	-1.22061	0.858891	0.560047	0.710369	0.622593	-1.23434	1.03385	-1.54867	-1.69117	-1.34222	1.04439	0.816891	1.30059	-0.165482	-1.75708	1.33302	-0.898323	-1.18578	0.49147	0.382893
	10	15.9409	0.128939	-1.46698	-0.791958	0.612659	0.594341	-3.56969	0.158085	0.69558	0.727779	-0.428608	0.346073	-0.375057	0.708199	1.94739	-0.0051651	1.38891	-0.11187	1.38195	0.359184	-1.0229	1.43087		10	15.9409	-0.0621483	-1.25011	0.784908	0.732079	1.05094	0.080986	-1.22787	0.932053	-1.48259	-1.4164	-1.32745	1.2094	0.784435	1.3935	-0.292259	-1.64663	1.41887	-1.1891	-0.524315	0.148872	0.577713
	10	15.9716	0.0640158	-1.74863	-1.0266	0.525803	0.535919	-3.6155	-0.0908127	0.6399	0.594311	-0.320904	0.262283	-0.124996	0.519428	1.91442	-0.0904007	1.67145	-0.170006	1.35695	0.104794	-0.99329	1.33619		10	15.9716	-0.0330591	-1.19949	0.861282	0.796917	1.27044	-0.0189819	-0.957771	0.883739	-1.16319	-1.67881	-1.37689	0.847984	0.873039	1.44321	-0.148647	-1.49048	1.123	-1.12191	-0.466488	0.18845	0.673431
	10	16.0023	0.0385448	-2.001	-0.980572	0.147251	0.824081	-3.64647	-0.00415802	0.757439	0.516884	-0.350182	0.128578	-0.128033	0.423035	2.03609	-0.072319	1.56232	-0.299656	1.39386	0.0782204	-0.956314	1.34184		10	16.0023	-0.0531044	-1.22491	0.76017	0.922432	1.49561	-0.206032	-1.09079	1.1276	-1.23836	-1.55474	-1.60678	0.709797	1.20306	1.56889	-0.388519	-1.90708	1.05049	-1.07934	-0.378941	0.180367	0.594975
	10	16.033	-0.0160486	-2.22866	-1.12453	-0.000995636	0.629509	-3.83244	0.0950623	0.696079	0.519985	-0.553562	0.0448914	-0.289085	0.20034	2.09317	-0.112396	1.71537	-0.554504	1.67909	0.143345	-0.815384	1.37374		10	16.033	-0.0466099	-1.13412	0.823936	0.941479	1.64883	-0.071434	-1.14804	1.10425	-1.35245	-1.70335	-1.59075	1.06592	1.30234	1.32126	-0.271328	-1.70652	0.943859	-1.02345	-0.659901	-0.0816307	0.658897
	10	16.0637	-0.0575539	-2.57005	-1.18623	-0.026947	1.0155	-3.99938	0.00621033	0.485722	0.249306	-0.747753	-0.077179	-0.370625	0.0427246	2.46176	0.0116272	1.65458	-0.602924	1.80894	0.00914764	-0.7826	1.46709		10	16.0637	-0.0425219	-1.04546	0.505157	0.847412	2.15436	0.017437	-1.0947	1.0139	-1.26823	-1.82147	-1.82378	1.2336	1.16184	1.36174	-0.468941	-1.61827	1.01711	-1.0632	-0.442001	-0.0674095	0.550476
	10	16.0945	-0.117668	-2.93427	-1.35184	-0.0866699	1.06052	-3.78779	-0.125443	0.535065	0.0518875	-0.776318	-0.175919	-0.228016	0.121067	2.31078	-0.22699	1.53198	-0.719059	1.7698	-0.0745468	-0.661831	1.41422		10	16.0945	-0.020402	-0.998043	0.697147	0.571671	2.38282	-0.0144157	-1.09572	1.00531	-1.24779	-1.82721	-2.06056	1.42262	1.38693	1.35754	-0.436146	-1.69533	0.812622	-1.02314	-0.275597	-0.0421829	0.671459
	10	16.1252	-0.180089	-3.20947	-1.41832	-0.082798	1.01791	-3.80595	-0.0401154	0.48328	0.00937653	-0.800205	-0.289394	-0.341919	0.0425186	2.40385	-0.120316	0.998856	-0.469402	1.57211	-0.0288773	-1.00063	1.47772		10	16.1252	0.00252781	-0.904736	0.781475	0.595726	2.49135	0.289291	-0.955944	0.831905	-1.05056	-1.97836	-2.22361	1.29094	1.03862	1.25797	-0.375183	-1.6185	0.739483	-1.27173	0.124161	0.230579	0.757664
	10	16.1559	-0.212707	-3.66101	-1.71959	-0.321121	0.942383	-3.84175	0.140789	0.464836	0.342232	-0.959423	-0.367668	-0.373055	-0.138489	2.32898	-0.269287	1.21484	-0.476078	1.65242	-0.0790901	-0.859585	1.72552		10	16.1559	0.0609236	-0.88063	0.731838	0.881294	2.27008	0.420509	-0.868008	0.844601	-1.05692	-1.7091	-2.12362	1.48098	1.28032	1.23676	-0.443157	-1.50612	0.619678	-0.968639	-0.116562	0.263542	0.861637
	10	16.1866	-0.26582	-3.85826	-1.6284	-0.429016	1.00433	-3.81167	0.138893	0.632221	0.211033	-1.0987	-0.365509	-0.292183	-0.217812	2.47235	-0.23423	1.01761	-0.658707	1.56445	-0.580818	-0.97858	1.79662		10	16.1866	0.0371202	-0.922283	0.667019	0.756111	2.70583	0.701557	-0.998119	0.821735	-1.2216	-1.55484	-2.36115	1.53336	1.35287	1.3258	-0.505241	-1.67093	0.277905	-1.09867	-0.347336	0.41024	0.870148
	10	16.2173	-0.333772	-4.22669	-1.70743	-0.545338	1.00587	-3.80217	0.147179	0.313194	-0.0245743	-1.10006	-0.528812	-0.604679	-0.442982	2.50319	-0.306076	0.962677	-0.856792	1.92564	-0.0476265	-1.00278	1.66282		10	16.2173	0.00171318	-0.661541	0.501118	0.468483	2.97971	0.609371	-0.857574	0.651615	-1.05243	-1.63826	-2.21422	1.70082	1.27179	1.21964	-0.597294	-1.70473	0.0384789	-1.36107	-0.463371	0.321953	0.821774
	10	16.2481	-0.393059	-4.2469	-1.89659	-0.60751	0.913559	-3.85902	-0.00916672	-0.0878983	-0.269466	-1.3578	-0.684849	-0.79768	-0.279549	2.82616	-0.15255	0.986149	-0.723614	1.51227	0.279793	-1.16507	1.75856		10	16.2481	0.0436792	-0.732361	0.365005	0.33765	3.0587	0.679535	-0.697681	0.47913	-0.973213	-1.2689	-2.05719	1.98423	1.20066	1.47983	-0.538406	-1.64396	-0.316544	-1.43996	-0.117393	0.276131	0.798325
	10	16.2788	-0.40103	-4.55439	-1.70531	-0.47937	0.941017	-3.6286	0.122169	-0.256664	-0.183399	-1.48716	-0.837208	-0.695683	-0.613182	2.75697	-0.184937	0.779549	-0.86694	1.59867	0.27227	-1.11798	2.11958		10	16.2788	0.0690878	-1.08323	0.508389	0.576595	2.92825	0.585503	-0.641628	0.443474	-0.886223	-1.14819	-2.02898	2.00983	1.42736	1.41171	-0.532204	-1.52931	-0.487141	-0.976452	-0.122936	0.319019	0.607922
	10	16.3095	-0.450713	-4.50633	-1.64321	-0.45602	0.833309	-3.58082	0.217426	0.175888	-0.562916	-1.67905	-1.00542	-0.618412	-0.692177	2.80387	-0.177353	0.634624	-0.788143	1.45068	-0.18969	-1.05036	1.81985		10	16.3095	0.129012	-1.11616	0.312122	0.397266	2.71656	1.07521	-0.393269	0.528687	-0.693359	-0.878262	-2.23425	2.10752	1.44968	1.43562	-0.340515	-1.41159	-0.559444	-1.01566	-0.301128	0.612644	0.888554
	10	16.3402	-0.442058	-4.74737	-1.67078	-0.341324	1.04493	-3.34309	0.12418	0.00327301	-0.427277	-1.48255	-1.10931	-0.678638	-0.78392	2.35659	-0.2621	0.686859	-0.734951	1.75643	-0.0431595	-1.26818	2.07923		10	16.3402	0.140465	-1.34568	0.360691	0.641026	2.8612	1.06506	-0.377033	0.612537	-0.620018	-0.882259	-2.21162	2.19507	1.61344	1.30075	-0.481949	-1.39126	-0.647858	-0.765713	-0.657295	0.661377	0.878826
	10	16.3709	-0.506866	-4.68194	-1.33747	-0.576015	0.953304	-3.26766	0.0824738	-0.382988	-0.450939	-1.66624	-1.235	-0.630474	-0.815773	2.2718	-0.225273	0.531139	-0.715092	1.78895	-0.144394	-1.32143	1.68568		10	16.3709	0.118587	-1.24703	0.385723	0.382713	2.99751	1.20506	-0.273937	0.142281	-0.734875	-0.624321	-2.06646	2.25541	1.44683	1.24491	-0.484531	-1.83168	-0.529186	-0.867981	-0.474316	0.318077	1.12756
	10	16.4017	-0.483554	-5.00545	-1.2044	-0.490433	0.924328	-2.92101	0.10413	-0.378506	-0.300365	-1.5923	-1.22213	-0.465267	-0.881672	2.47982	-0.462811	0.51984	-0.860203	1.68946	-0.145142	-1.44265	1.9837		10	16.4017	0.152098	-1.25721	0.36945	0.730598	3.14936	1.00075	-0.486355	0.215534	-0.570129	-0.33078	-2.22837	2.78067	1.44133	1.16935	-0.659782	-1.6386	-0.93774	-0.726742	-0.224682	0.42522	0.82008
	10	16.4324	-0.496393	-5.11505	-1.02275	-0.430389	0.84449	-2.67285	-0.0261917	-0.266201	-0.584881	-1.30182	-1.27505	-0.756886	-0.812199	2.42184	-0.403912	0.321938	-0.603069	1.70245	-0.325352	-1.35434	1.73237		10	16.4324	0.175433	-1.14076	0.458881	0.543797	3.10788	1.21526	-0.30759	0.365322	-0.594582	0.17432	-2.14078	2.74191	1.27606	0.95705	-0.596199	-1.7171	-1.03274	-0.88081	-0.437828	0.684017	0.832558
	10	16.4631	-0.445771	-5.1176	-1.0784	-0.421982	0.980984	-2.48372	0.16761	-0.274055	-0.556293	-1.3978	-1.02215	-0.479881	-0.827312	2.34524	-0.527508	-0.19989	-0.661316	1.67034	0.0320358	-1.17699	2.11327		10	16.4631	0.220274	-1.13924	0.765953	0.386669	2.84226	1.07165	-0.304707	0.490204	-0.637527	0.374081	-2.10558	2.58433	1.49462	0.944214	-0.548847	-1.81358	-0.746685	-0.612755	0.0122223	0.552219	0.795963
	10	16.4938	-0.520209	-5.36781	-0.970104	-0.430805	0.891747	-2.66888	0.136688	-0.374634	-0.640385	-1.47271	-1.26233	-0.422565	-1.04173	2.40178	-0.61969	-0.21312	-0.543262	1.78964	-0.34565	-1.29915	2.04881		10	16.4938	0.169006	-1.19319	0.589024	0.188614	2.6557	0.982185	-0.273495	0.345531	-0.455666	0.411369	-2.18296	2.79157	1.25286	0.954178	-0.411148	-1.59498	-0.831371	-0.828022	-0.0726662	0.443928	0.608662
	10	16.5245	-0.522353	-5.2841	-1.08978	-0.14941	0.862553	-2.48571	0.0966911	-0.579987	-0.179333	-1.41921	-1.462	-0.61969	-0.595238	2.09171	-0.958141	-0.255203	-0.463753	1.7702	-0.553955	-1.26366	2.09096		10	16.5245	0.190106	-1.2728	0.435467	0.215508	2.76825	1.05736	-0.182125	0.272038	-0.286293	0.577366	-2.21216	2.81369	1.3069	1.1155	-0.451534	-1.50343	-1.01664	-0.619835	0.0367088	0.270836	0.477318
	10	16.5553	-0.522028	-5.24104	-1.07873	-0.386066	0.879108	-2.31891	-0.263821	-0.783283	-0.363667	-1.17135	-1.40104	-0.763416	-1.13533	2.16416	-0.259106	-0.302864	-0.226772	1.78981	-0.409798	-1.31775	2.1493		10	16.5553	0.189377	-1.37268	0.517426	0.294998	2.85541	0.766716	-0.140293	0.470116	-0.476429	0.874687	-2.00097	2.92806	1.09321	0.788155	-0.197895	-1.57796	-1.41589	-0.493725	0.0522156	0.340454	0.481934
	10	16.586	-0.551808	-5.27584	-0.999123	-0.450352	0.9776	-2.29729	-0.190125	-0.745647	-0.242512	-1.21461	-1.25401	-0.706593	-1.28381	2.20687	-0.626953	-0.375175	-0.388992	1.79481	-0.635471	-1.41118	2.08227		10	16.586	0.177515	-1.25151	0.524601	0.3209	2.7698	0.659435	-0.441532	0.631645	-0.118374	1.43705	-1.88162	2.73112	1.40889	1.02473	-0.645527	-1.89141	-1.25325	-0.685329	-0.386234	0.123932	0.472992
	10	16.6167	-0.559648	-5.32422	-1.02678	-0.451069	1.17766	-2.09129	-0.618397	-0.817902	-0.511345	-0.900436	-1.3919	-0.694538	-1.25338	2.02374	-0.567978	-0.502274	-0.248875	1.73917	-0.477329	-1.62942	2.37362		10	16.6167	0.219703	-1.29092	0.610538	0.237717	2.68876	0.675999	-0.335667	0.857285	-0.205219	1.47203	-1.73692	2.77228	1.28366	0.777592	-0.819023	-1.63996	-1.00165	-0.442417	0.189083	0.142639	0.158257
	10	16.6474	-0.497033	-5.12909	-0.554588	-0.134521	1.23442	-1.93783	-0.260986	-0.949257	-0.515503	-0.875999	-1.39305	-0.780346	-1.04597	1.70683	-0.615032	-0.582394	-0.204075	1.65093	-0.445274	-1.53655	2.42762		10	16.6474	0.243895	-1.15498	0.521538	0.182419	2.59507	0.725098	-0.312538	0.646534	-0.261536	1.63792	-1.75335	2.9001	1.46721	0.81287	-0.577278	-1.96146	-1.11285	-0.241177	0.329975	0.126213	0.308125
	10	16.6781	-0.515507	-5.06303	-0.775093	-0.230938	1.10522	-2.0284	-0.654709	-1.07947	-0.458115	-0.593094	-1.41803	-1.01785	-1.18709	1.76661	-0.440067	-0.689728	0.302158	1.92215	-0.776997	-1.46989	2.47623		10	16.6781	0.238656	-1.10364	0.692997	0.342739	2.44519	0.376232	-0.346214	0.752544	-0.215839	1.54831	-1.76396	2.88371	1.31833	0.799873	-0.68148	-1.91015	-1.10882	-0.157852	0.559395	-0.0330162	0.374771
	10	16.7089	-0.501493	-4.79757	-0.849106	0.016613	1.23676	-1.98958	-0.612541	-1.01098	-0.598843	-0.745384	-1.33796	-1.02689	-1.2417	1.67789	-0.327915	-0.69754	0.130474	1.68294	-0.435822	-1.68019	2.5775		10	16.7089	0.266526	-1.17136	0.384827	0.492489	2.65207	0.496025	-0.327847	0.827435	-0.0632629	1.58591	-1.73859	2.91389	1.55275	0.681835	-0.438171	-1.83553	-1.41964	-0.105915	0.488167	-0.266644	0.622074
	10	16.7396	-0.47353	-4.71344	-0.915699	-0.272255	1.69343	-1.75093	-0.667046	-0.964802	-0.376099	-0.501923	-1.41945	-1.18387	-1.3092	1.65129	-0.267181	-0.902374	0.342915	1.68332	-0.185402	-1.76048	2.34859		10	16.7396	0.236189	-0.955437	0.557682	0.314644	2.47174	0.211117	-0.566036	0.941101	-0.071022	1.77372	-1.69449	2.98594	1.48098	0.479713	-0.788254	-1.73532	-1.31692	-0.106518	0.524536	-0.551434	0.768021
	10	16.7703	-0.509084	-4.31294	-0.948448	-0.223309	1.55738	-1.57791	-1.00845	-1.04771	-0.434597	-0.609352	-1.46136	-1.09172	-1.41594	1.64558	-0.439125	-1.11121	0.29232	1.53108	-0.438553	-1.28976	2.20234		10	16.7703	0.228219	-0.863029	0.582073	0.60437	2.66457	0.287956	-0.432701	0.101807	0.148773	1.70524	-1.44355	2.7923	1.66067	0.383724	-0.926598	-1.82928	-1.41151	-0.0321465	0.407459	-0.356133	0.52039
	10	16.801	-0.430191	-4.3634	-0.943237	0.076252	1.54916	-1.22416	-1.09809	-0.931915	-0.389591	-0.123684	-1.36478	-0.889828	-1.72458	1.42711	-0.530418	-1.28875	0.579151	1.75889	-0.281006	-1.14488	2.30394		10	16.801	0.26436	-0.951195	0.574131	0.550808	2.57542	0.397297	-0.278542	0.714066	-0.0680199	1.7763	-1.49761	2.91852	1.63235	0.111656	-0.886353	-1.89445	-1.33097	0.345234	0.332325	-0.380356	0.646568
	10	16.8317	-0.460794	-4.28639	-1.13364	0.355431	1.382	-1.56031	-1.33333	-1.00021	-0.532501	-0.132442	-1.37766	-0.704876	-1.86844	1.71586	-0.449722	-1.35062	0.438591	1.81066	-0.394493	-1.11718	2.32338		10	16.8317	0.32014	-0.682163	0.215469	0.716354	2.695	0.390228	-0.00272369	0.565533	0.088562	1.77532	-1.30071	2.74508	1.86433	-0.324738	-0.778313	-1.64743	-1.35241	0.333038	0.458042	-0.211555	0.855892
	10	16.8625	-0.390941	-4.38702	-1.18337	0.383694	1.57702	-1.56213	-1.36316	-0.69688	-0.454014	0.10545	-1.29108	-0.586575	-1.83088	1.60772	-0.601276	-1.29636	0.776684	1.95519	-0.277798	-0.872429	2.1784		10	16.8625	0.373746	-0.69313	0.570068	0.811184	2.56483	0.183552	-0.447517	1.02165	0.199924	1.64848	-1.57264	2.9562	2.09079	-0.1716	-0.642929	-1.69887	-1.15838	0.469284	0.518482	-0.126202	0.951744
	10	16.8932	-0.48594	-4.06558	-1.16315	0.292377	1.41538	-1.35991	-1.42073	-1.10985	-0.740513	-0.0815086	-1.40594	-0.539009	-1.9058	1.65873	-0.791924	-1.38776	0.653027	1.79507	-0.721828	-0.771755	1.93188		10	16.8932	0.378315	-0.427628	0.446281	0.821762	2.63886	0.134621	-0.393681	0.832932	0.26231	1.61654	-1.3143	2.85944	1.91876	-0.532921	-0.652084	-1.40663	-1.29528	0.35099	0.943344	-0.224541	0.987522
	10	16.9239	-0.460312	-4.1129	-1.20507	0.168926	1.54768	-1.03675	-1.33657	-1.24546	-0.644154	0.165802	-1.23994	-0.564617	-1.95172	1.53548	-0.822029	-1.61724	0.647388	2.09087	-0.433952	-0.825825	1.67385		10	16.9239	0.351835	-0.526581	0.641674	1.07116	2.4776	-0.0892677	-0.325726	0.825191	0.281288	1.39432	-1.47657	2.75884	2.11859	-0.637314	-0.557724	-1.5931	-1.13697	0.552898	0.648754	-0.461266	1.07092
	10	16.9546	-0.486503	-4.07978	-1.39317	0.119156	1.68965	-0.982384	-1.37894	-1.28951	-0.650745	-0.11039	-1.22494	-0.679184	-1.77219	1.53442	-0.923626	-1.73081	0.828644	2.09602	-0.692619	-0.60194	1.51225		10	16.9546	0.335232	-0.187431	0.553379	1.06026	2.36143	0.0472755	-0.175018	0.782818	0.0226135	1.49306	-1.62087	2.73551	2.21884	-0.691685	-0.615471	-1.72784	-1.40743	0.517971	0.790016	-0.515446	1.06266
	10	16.9853	-0.36638	-3.80378	-1.36854	0.0942993	2.26186	-0.801353	-1.42569	-1.10378	-0.485905	0.0854797	-1.27379	-0.402393	-1.81731	1.71523	-0.853031	-1.7443	0.873634	1.85266	-0.524895	-0.531178	1.9252		10	16.9853	0.401733	-0.18792	0.810093	1.36081	2.05087	0.168262	-0.303082	0.868694	0.123096	1.77301	-1.43118	2.87092	2.33011	-0.904808	-0.540176	-1.77831	-1.2708	0.468769	0.931648	-0.330433	1.0251
	10	17.0161	-0.487433	-3.90973	-1.6064	0.185902	2.00988	-0.574188	-1.51174	-1.17036	-0.684994	-0.254742	-1.19405	-0.734489	-1.9906	1.6431	-0.849827	-1.57169	0.726742	1.81728	-0.754623	-0.539597	1.21545		10	17.0161	0.373315	-0.181709	0.621719	1.0792	1.88556	0.147068	-0.277493	0.745003	0.21489	1.53158	-1.19057	2.81627	2.35705	-0.680218	-0.70966	-1.64658	-1.3695	0.580853	1.07858	-0.760323	1.22459
	10	17.0468	-0.454657	-4.03083	-1.5711	0.287132	2.07518	-0.247482	-1.30421	-1.51705	-0.630444	0.472767	-1.16686	-0.600498	-2.12399	1.32617	-0.871128	-1.66547	0.957809	1.75945	-0.712757	-0.398689	0.868866		10	17.0468	0.390274	-0.280487	0.397442	1.41628	2.03094	-0.0728188	-0.202328	0.848	0.280033	1.53582	-1.0356	2.98311	2.35369	-1.03022	-0.425465	-1.42629	-1.37563	0.593407	0.993935	-0.670654	0.892307
	10	17.0775	-0.508435	-3.74966	-1.79023	0.281353	2.04625	-0.300007	-1.41167	-1.42496	-0.830063	0.188286	-1.19066	-0.830891	-1.9879	1.51292	-0.826256	-1.90974	0.777683	1.6768	-0.981346	-0.358883	0.940281		10	17.0775	0.408699	-0.0630875	0.517807	1.62047	1.87167	-0.17889	0.0135612	0.799633	0.207508	1.5322	-0.825283	2.97132	2.25734	-1.15808	-0.437729	-1.22837	-1.43359	0.376873	0.857689	-0.571259	1.04419
	10	17.1082	-0.470406	-3.44746	-1.73067	0.208645	2.13536	-0.120811	-1.53478	-1.26509	-0.79163	-0.266212	-0.998974	-0.554127	-1.85968	1.41138	-1.03142	-1.9351	0.886951	1.58402	-0.946968	-0.0701332	0.918583		10	17.1082	0.387791	0.0444565	0.471302	1.70605	2.08115	-0.266781	-0.201328	1.00088	0.220276	1.3423	-0.833157	2.87127	2.30687	-1.37289	-0.380238	-1.34501	-1.52246	0.565403	0.783485	-0.521751	0.806
	10	17.1389	-0.46857	-3.4702	-2.0731	0.2075	2.17698	-0.247875	-1.34818	-1.40502	-0.71315	-0.293018	-1.04385	-0.724079	-1.86297	1.51181	-1.01794	-1.89056	1.00592	1.8078	-0.899368	-0.0443993	0.952286		10	17.1389	0.445525	0.324097	0.463257	1.55717	2.02271	-0.411621	-0.0931931	1.13344	0.280369	1.24913	-0.600475	2.99191	2.04243	-1.37728	0.0572586	-1.18641	-1.47091	0.457317	0.953476	-0.479195	0.997021
	10	17.1697	-0.437671	-3.04501	-2.13868	0.37851	2.21267	-0.301483	-1.03704	-1.25439	-0.829975	-0.328568	-1.36518	-0.347511	-1.27996	1.52444	-1.1375	-2.43207	1.1475	1.75087	-1.15848	-0.18758	1.07603		10	17.1697	0.461628	0.270676	0.520393	1.62733	1.73764	-0.239815	-0.142784	1.50957	0.0993843	1.16897	-0.447899	3.24752	2.12145	-1.45451	-0.330036	-1.27536	-1.4849	0.629383	1.16767	-0.402351	0.910236
	10	17.2004	-0.479941	-3.10411	-2.16097	0.266834	2.13505	-0.267651	-1.11228	-1.42344	-0.933285	-0.292542	-1.4725	-0.554684	-1.24785	1.58593	-0.911507	-2.36097	0.973713	1.48475	-1.06653	-0.201481	1.06471		10	17.2004	0.45115	0.453663	0.480122	1.67838	1.87814	-0.259857	0.310375	1.77741	-0.00404358	1.06474	-0.270767	3.07531	1.84196	-1.4124	-0.264984	-0.981247	-1.84996	0.703064	1.02176	-0.689106	0.47044
	10	17.2311	-0.408875	-3.06001	-2.3071	0.197296	2.31043	-0.083149	-1.09245	-1.38484	-1.06932	-0.478855	-1.11728	-0.588078	-1.23172	1.53631	-0.650055	-2.34229	1.2917	1.40695	-0.949089	0.237377	1.19667		10	17.2311	0.418985	0.222088	0.584492	1.5242	1.85176	-0.190025	0.226517	2.13683	0.069191	0.894905	-0.559933	3.06953	2.10698	-1.6759	-0.252205	-1.20108	-1.8222	0.736111	1.0051	-0.725933	0.37928
	10	17.2618	-0.41228	-3.17903	-2.92275	0.0433006	2.21375	-0.101475	-1.01026	-1.07475	-0.949543	-0.363708	-1.0631	-0.693108	-1.27718	1.59479	-0.658638	-2.25441	1.33999	1.61364	-1.0052	0.284496	1.2176		10	17.2618	0.397913	0.150673	0.621864	1.40997	1.62995	-0.386158	0.0379524	2.33238	0.0158195	0.853588	-0.412746	3.00898	1.93921	-1.71861	-0.121231	-0.923477	-1.59474	0.523941	0.709106	-0.770027	0.651814
	10	17.2925	-0.304544	-2.69789	-2.81808	0.330692	2.59238	-0.143269	-0.825333	-1.01289	-0.842445	-0.437454	-0.940826	-0.600437	-0.94986	1.67538	-0.412949	-2.31937	1.33893	1.57131	-1.13129	0.407467	1.12505		10	17.2925	0.444358	0.0464439	0.496525	1.35632	1.64804	-0.0339546	-0.0346947	2.64732	0.0535049	0.718143	-0.261837	3.04686	1.9689	-1.805	-0.313313	-0.7449	-1.4797	0.665527	0.882652	-0.616486	0.64682
	10	17.3233	-0.297126	-2.68468	-2.91769	0.359325	2.46299	-0.1413	-1.12642	-0.733097	-1.30247	-0.482658	-1.10594	-0.631428	-0.810448	1.70909	-0.308117	-2.29125	1.7267	1.52843	-0.946705	0.315968	1.43719		10	17.3233	0.450396	0.170208	0.596748	1.46912	1.78185	-0.23444	0.0827599	2.92058	-0.0426521	0.691139	-0.116543	3.25402	2.00956	-1.99198	-0.2873	-0.69854	-1.44141	0.407711	0.72644	-0.862621	0.57328
	10	17.354	-0.277852	-2.38593	-2.77461	0.136395	2.41959	-0.0511436	-1.15704	-0.561386	-1.20669	-0.543301	-1.03474	-0.652481	-0.524784	1.8455	-0.410194	-2.49697	1.88903	1.60146	-1.16396	0.289112	1.22511		10	17.354	0.466022	0.106232	0.597225	1.55603	1.91196	-0.281219	0.0302124	3.12282	-0.147411	0.767838	0.181606	2.91337	2.21554	-2.03633	-0.295155	-0.767265	-1.59797	0.565823	0.664879	-0.735329	0.547569
	10	17.3847	-0.289223	-2.42056	-2.73433	0.234894	2.70915	-0.0960884	-1.07936	-0.45232	-1.22122	-0.479103	-1.35147	-0.592236	-0.801804	1.63304	-0.409538	-2.45871	2.02736	1.41608	-1.31082	0.278767	1.32382		10	17.3847	0.51276	0.236858	0.672352	1.32495	2.01769	-0.436501	0.0438881	3.40013	-0.117313	0.49411	0.354	3.29251	1.91723	-1.97578	-0.636299	-0.463291	-1.41411	0.533562	0.517647	-0.695736	1.1893
	10	17.4154	-0.279955	-2.30484	-2.74387	0.178364	2.9369	-0.247791	-1.11684	-0.395927	-1.32908	-0.529053	-1.32431	-0.583771	-0.532883	1.72666	-0.535164	-2.64709	2.1056	1.25167	-1.32688	0.595802	1.2234		10	17.4154	0.486651	0.240158	0.407955	1.2477	2.00302	-0.470913	-0.185757	3.5773	0.0393257	0.442158	0.510998	3.00392	2.1363	-2.0965	-0.694641	-0.232849	-1.32411	0.522224	0.481884	-0.501282	0.626129
	10	17.4461	-0.165547	-2.10091	-2.30823	0.114746	3.13668	-0.19566	-0.938339	-0.587505	-1.15839	-0.583389	-0.969997	-0.600056	-0.741196	1.65585	-0.123077	-2.38705	2.0025	1.40189	-1.34824	1.02071	1.39871		10	17.4461	0.523089	0.30246	0.501881	1.33045	2.24556	-0.548462	-0.0971603	3.5379	0.0390396	0.253521	0.816746	2.89225	2.00978	-1.95972	-0.62991	-0.368008	-1.2353	0.495377	0.77676	-0.27705	0.375668
	10	17.4769	-0.196585	-1.91305	-2.27232	-0.0774918	2.96291	-0.235405	-0.938976	-0.418728	-1.13618	-0.822441	-1.14233	-0.549904	-0.543144	1.67181	-0.196354	-2.33881	2.12935	1.06442	-1.28128	0.691551	1.41468		10	17.4769	0.524834	0.22216	0.416752	1.3716	2.24856	-0.467377	-0.0383568	3.65993	0.050499	0.0667839	1.14179	2.86536	2.03313	-2.02235	-0.652489	-0.670216	-1.1848	0.482574	0.71804	0.0402946	0.214783
	10	17.5076	-0.0512777	-1.86951	-2.1331	-0.127819	3.54646	-0.144939	-0.830265	-0.070816	-1.0218	-0.527519	-0.926033	-0.9408	-0.226299	1.67279	-0.26862	-2.08327	2.1589	1.19039	-0.810986	0.882858	1.50482		10	17.5076	0.498935	0.13298	0.560661	1.1581	2.58124	-0.8055	-0.0539284	3.63386	0.0190277	0.138935	1.17555	3.14926	1.82996	-2.10811	-0.867577	-0.626442	-1.6205	0.634949	0.880569	0.122852	0.0428238
	10	17.5383	-0.0670216	-1.74411	-1.91002	-0.00966263	3.69083	-0.327003	-0.938698	-0.0701828	-1.18811	-0.45414	-0.868752	-0.651947	-0.463177	1.43692	-0.0685997	-2.41795	2.14103	1.24954	-1.16954	0.907558	1.51558		10	17.5383	0.558221	0.178123	0.447292	0.881317	2.90464	-0.186733	-0.32032	3.57217	-0.0124207	0.422337	1.38574	3.07378	1.79992	-2.05038	-0.998886	-0.434372	-1.54623	0.639851	1.06434	0.395721	-0.0514603
	10	17.569	0.00354481	-1.65139	-1.41771	0.013607	3.85189	-0.362171	-0.778042	-0.210724	-1.14129	-0.483101	-0.706123	-0.501766	-0.207512	1.522	-0.0885429	-2.27382	2.12582	1.40857	-1.14256	0.734196	1.37957		10	17.569	0.536395	-0.199684	0.445766	0.87706	2.8241	-0.00601196	-0.422699	3.91295	0.197662	0.224243	1.49588	3.09726	1.73828	-2.02677	-1.34934	-0.488445	-1.22173	0.569	0.760071	0.391678	-0.0913696
	10	17.5997	-0.105511	-1.83044	-1.3877	-0.197414	3.95568	-0.576931	-1.14558	-0.508945	-1.35279	-0.816872	-0.846413	-0.607254	-0.243237	1.08273	-0.0770988	-2.05178	2.33385	1.26762	-0.986416	0.734169	1.14462		10	17.5997	0.56263	-0.24477	0.475632	0.763611	2.48019	0.0771713	-0.393364	3.93747	0.19096	-0.226009	1.77649	3.17039	1.80008	-1.89601	-1.051	-0.221241	-0.906113	0.698273	0.641125	0.383991	-0.204277
	10	17.6305	0.0101141	-1.7467	-1.31922	-0.221161	3.95943	-0.524143	-0.772156	-0.404686	-1.28791	-0.409344	-0.656048	-0.493935	-0.232212	1.4763	-0.0429573	-1.99828	2.38057	1.27942	-0.717098	0.967464	0.964947		10	17.6305	0.52777	-0.211273	0.316307	0.675873	2.69927	-0.21085	-0.394913	3.76764	0.39473	-0.618385	1.79887	3.01795	1.75862	-1.76521	-1.20136	-0.516331	-0.698704	0.715	0.641563	0.409809	-0.0232048
	10	17.6612	0.048173	-1.57749	-1.1532	-0.456329	3.967	-0.296574	-0.825203	-0.360077	-1.16161	-0.391716	-0.429359	-0.637081	0.193001	1.49051	0.213127	-1.98021	2.37529	0.884178	-0.826469	0.814289	1.12138		10	17.6612	0.540319	-0.383793	-0.0958252	0.704063	2.80392	-0.0313072	-0.565533	3.81184	0.500549	-0.499226	2.04268	3.01263	1.54976	-1.86617	-0.808056	-0.0126801	-0.819828	0.812714	0.553528	0.407009	-0.309895
	10	17.6919	0.15295	-1.15163	-0.462288	-0.297791	4.1111	-0.541248	-0.337334	-0.206215	-1.06347	-0.174191	-0.163284	-0.303532	0.0383224	1.22158	0.182526	-2.34754	2.25489	0.901215	-0.524811	0.861034	1.06167		10	17.6919	0.541712	-0.537189	0.20541	0.53933	3.01693	-0.0649986	-0.79591	3.64711	0.581753	-0.530575	1.74366	3.01464	1.26338	-1.57837	-0.902828	0.0526466	-0.900654	1.16562	0.867489	0.479095	-0.432285
	10	17.7226	0.124881	-1.46784	-0.283676	-0.217491	3.93218	-0.767067	-0.716778	-0.384003	-1.04323	0.0132866	-0.233784	-0.302483	-0.0210533	1.46591	0.149624	-2.06374	2.26442	0.980881	-0.446037	0.808304	0.8302		10	17.7226	0.49394	-0.618671	0.0834198	0.404716	2.8574	-0.170879	-0.745556	3.66607	0.558365	-0.709652	1.9445	2.94535	1.20611	-1.53907	-1.07268	0.0492477	-0.8204	1.20794	0.50774	0.537827	-0.412971
	10	17.7533	0.149629	-1.38257	-0.176281	-0.287273	4.18421	-0.840595	-0.617752	-0.475414	-0.993603	-0.185421	-0.289227	-0.0598602	-0.0559006	1.52705	0.0879135	-2.00667	2.28235	0.816292	-0.329407	0.80267	0.992054		10	17.7533	0.537307	-0.691948	-0.0443115	0.5741	3.05874	-0.0649109	-0.65041	3.82822	0.682484	-0.674953	1.81377	2.68149	1.16932	-1.27395	-0.961266	-0.0837898	-0.523464	1.45008	0.841549	0.217789	-0.602409
	10	17.7841	0.133794	-1.30661	-0.075058	-0.451809	4.05445	-0.860481	-0.335514	-0.553146	-1.05458	-0.445694	-0.29657	-0.103954	-0.189915	1.86977	0.134045	-2.07318	2.31108	0.859779	-0.225002	0.713406	0.704865		10	17.7841	0.473538	-0.53278	0.145981	0.263062	2.93219	-0.361923	-0.623363	3.65855	0.467209	-0.912285	1.99373	2.44215	0.714413	-1.22567	-0.985298	0.120213	-0.451965	1.43495	0.714485	0.413586	-0.736481
	10	17.8148	0.193448	-0.878471	0.115162	-0.16666	4.03526	-0.999966	-0.414608	-1.00704	-0.780781	-0.410583	-0.108433	0.149212	-0.0117302	1.71692	0.200027	-2.27283	2.26526	0.84111	-0.293247	0.866539	1.02381		10	17.8148	0.47687	-0.603821	-0.0592117	0.199688	3.01863	-0.407757	-0.71096	3.65014	0.553204	-1.11005	1.73567	2.27272	0.799908	-0.786514	-0.875252	-0.135944	-0.29232	1.74531	0.826553	0.506523	-0.789124
	10	17.8455	0.186507	-0.862854	-0.223236	-0.05867	3.99281	-0.946178	-0.639332	-1.03333	-0.43177	-0.314896	0.148941	0.126751	-0.235153	1.87785	0.151642	-2.05953	2.10818	0.894646	-0.53075	0.919922	0.845104		10	17.8455	0.48238	-0.736141	0.0805092	0.233604	3.06883	-0.469196	-0.822041	3.46843	0.557861	-1.33326	1.83235	2.352	0.974319	-0.684486	-0.676331	-0.314423	-0.245625	2.03703	1.00568	0.282661	-0.964172
	10	17.8762	0.196436	-0.384216	-0.184875	0.0907936	3.64479	-0.960854	-0.444504	-1.09177	-0.317402	-0.413887	0.353271	0.387119	0.18251	1.69267	0.113136	-2.32341	1.95426	0.598217	-0.59227	0.820049	0.805096		10	17.8762	0.504917	-0.655651	-0.0766335	0.262417	2.99966	-0.265659	-0.799603	3.28128	0.575401	-1.26835	1.79287	2.16527	1.08919	-0.639877	-0.483856	-0.284214	-0.0674782	2.11533	0.904099	0.274921	-0.820763
	10	17.9069	0.282043	-0.234623	0.0393219	0.014492	3.63129	-0.935329	-0.304161	-1.17253	-0.285999	-0.332882	0.449833	0.796398	0.223351	1.99353	0.0952301	-2.1183	2.10273	0.643341	-0.612297	0.691265	0.956184		10	17.9069	0.514673	-1.04237	-0.208248	0.263504	2.8932	-0.175243	-0.79417	3.2742	0.521671	-1.07576	1.77633	1.9572	0.961327	-0.246925	-0.13055	-0.0840645	0.0112495	2.08469	0.58041	0.485031	-0.758026
	10	17.9377	0.241449	-0.032692	0.201256	0.0974007	3.49976	-0.955833	-0.391495	-1.38157	-0.403564	-0.0684204	0.668121	-0.0378151	0.228889	1.89038	0.398548	-2.21906	1.75185	0.668552	-0.793449	0.715488	0.992638		10	17.9377	0.529657	-0.754246	-0.452675	0.416378	2.76036	-0.104252	-0.89497	3.21578	0.520111	-0.873493	1.55611	1.9861	1.01985	-0.0639038	-0.355751	-0.119221	0.0387383	2.28909	0.704147	0.525776	-0.820786
	10	17.9684	0.259177	0.0902939	0.0783157	0.177578	3.36848	-0.863758	-0.307808	-1.22808	-0.435551	-0.000991821	0.475441	0.286961	0.183365	1.85534	0.573738	-2.1998	1.55439	0.606705	-0.837818	0.702984	1.10374		10	17.9684	0.560998	-0.789333	-0.266567	0.452675	2.68315	-0.167446	-0.947041	3.25207	0.673759	-1.31157	1.30691	2.02482	0.927376	0.369038	-0.0262184	-0.163708	0.197918	2.52655	0.852421	0.395935	-0.770782
	10	17.9991	0.231127	0.208706	-0.0902596	0.286392	3.18124	-0.989037	-0.299633	-1.57748	-0.0398827	-0.378529	0.490879	0.724552	0.299118	1.87334	0.347549	-2.5374	1.60059	0.607208	-0.958481	0.77742	1.09624		10	17.9991	0.586591	-0.988277	-0.414124	0.28397	2.87886	0.0757637	-0.904636	3.25979	1.00976	-0.972294	0.841358	1.81057	0.740623	0.93874	-0.300488	-0.358051	0.157864	2.85656	0.812607	0.603622	-0.600384
	10	18.0298	0.320231	0.438831	-0.147823	0.177128	3.34287	-0.792324	-0.218857	-1.36343	-0.0518265	-0.393272	0.722481	1.10899	0.556145	1.68053	0.386898	-2.46961	1.58622	0.638153	-0.993496	0.848476	1.34853		10	18.0298	0.61542	-1.01813	-0.421001	0.343693	2.78578	0.12487	-0.873466	3.21416	0.893127	-0.690842	0.754791	1.90529	0.711716	0.715675	-0.188763	-0.085247	0.247246	3.06178	0.892345	0.627831	-0.692448
	10	18.0605	0.272304	0.73497	-0.368542	0.188282	3.1319	-1.19316	-0.188099	-1.44353	-0.0269127	-0.275162	0.635193	1.05529	0.56765	1.83407	0.60672	-2.46206	1.43318	0.403278	-1.19744	0.592789	1.41766		10	18.0605	0.631401	-0.855743	-0.52536	0.447021	2.80809	0.40247	-0.909565	2.90317	1.0489	-0.527287	0.480324	1.78615	0.49292	1.13432	0.00451279	-0.107021	0.120312	3.03274	0.823372	0.584915	-0.516209
	10	18.0913	0.312665	0.84079	-0.233727	0.362488	2.93013	-1.1176	0.099781	-1.46821	0.243801	0.119183	0.399567	0.880192	0.391483	1.66792	0.415939	-2.4343	1.41028	0.471405	-1.12094	0.7878	1.60732		10	18.0913	0.588791	-0.986778	-0.477413	0.146439	2.86038	0.193352	-1.1597	3.07124	0.984253	-0.770138	0.25008	1.56343	0.388622	1.38496	0.249203	0.00925446	0.0925026	3.1459	0.801891	0.533787	-0.505455
	10	18.122	0.280689	0.621517	-0.0809479	0.245792	2.64617	-1.02299	-0.156723	-1.50849	0.387508	0.100597	0.365578	1.09076	0.323055	1.57487	0.186974	-2.11402	1.05695	0.798012	-0.977451	0.823826	1.25279		10	18.122	0.617164	-0.920235	-0.668919	0.0598679	2.9861	0.434288	-0.968437	2.90389	0.984909	-0.426647	0.0352821	1.69398	0.236893	1.53215	-0.0364151	0.16135	0.22052	3.14064	0.74865	0.567368	-0.341949
	10	18.1527	0.328622	1.14719	-0.0349236	0.297741	2.42195	-0.714363	0.193943	-1.53226	0.400288	0.0355072	0.592564	1.09607	0.33326	1.61938	0.290218	-2.13519	0.933929	0.865402	-1.34906	0.756557	1.35424		10	18.1527	0.617972	-1.09113	-0.851311	0.189831	3.19166	0.327381	-0.935013	2.85184	1.03357	-0.650761	-0.0838585	1.57181	0.439465	1.58471	-0.0394745	0.235237	0.31057	3.51787	0.576809	0.763229	-0.583004
	10	18.1834	0.321548	1.43011	-0.0864944	0.405865	2.22474	-0.697258	0.355247	-1.40423	0.524647	0.131294	0.685413	0.864552	0.27697	1.52226	0.0649872	-2.18351	0.73682	0.772907	-1.24357	0.819462	1.23074		10	18.1834	0.645099	-0.893497	-0.957088	0.0467567	3.24265	0.401291	-0.751095	2.63863	1.20869	-0.743294	-0.174812	1.57962	0.150311	1.73584	0.0176964	0.199322	0.557594	3.48503	0.491089	1.01447	-0.347218
	10	18.2141	0.325875	1.41929	-0.165241	0.30611	1.96782	-0.467781	0.325905	-1.61317	0.66708	0.09869	0.647362	1.01238	0.351913	1.41483	-0.148281	-1.98482	0.851498	0.726154	-1.23407	0.981609	1.36021		10	18.2141	0.622666	-0.928188	-1.11563	-0.183403	3.15797	0.330563	-0.793343	2.71203	1.68436	-1.00667	-0.23317	1.49681	-0.0476112	1.68268	0.0936584	0.128895	0.716885	3.80176	0.496857	0.890678	-0.431808
	10	18.2449	0.330614	1.36755	-0.00950623	0.429722	1.66439	-0.255241	0.355209	-1.67524	0.562778	-0.0217934	0.618252	1.15738	0.284729	1.4525	-0.215992	-1.73448	0.705826	0.841206	-1.16122	0.909702	1.33652		10	18.2449	0.581589	-0.687027	-1.05188	-0.507305	3.10682	0.518223	-0.96664	2.77684	1.54811	-1.08439	-0.288746	1.45013	-0.0808258	1.52128	0.1082	0.196102	0.747425	3.6326	0.419716	1.05242	-0.779278
	10	18.2756	0.375283	1.59812	0.322205	0.259594	1.74371	0.00383377	0.711761	-1.72228	1.02715	0.0727158	0.607849	0.882969	0.481804	1.22799	-0.22958	-2.12383	0.444088	0.85323	-1.27973	1.05595	1.56812		10	18.2756	0.554066	-0.650631	-1.07501	-0.537796	3.13086	0.69569	-1.02367	2.70428	1.95484	-1.0087	-0.325649	1.19362	-0.0210381	1.4432	-0.0512428	0.00356674	0.798565	3.62165	0.227215	1.153	-1.15144
	10	18.3063	0.315692	1.65241	0.606781	0.204723	1.69932	-0.359478	0.449684	-1.8349	0.869743	0.0877113	0.565178	0.794888	0.417255	1.17358	-0.257557	-2.06118	0.423046	0.849884	-1.3046	1.00297	1.33438		10	18.3063	0.593829	-0.6423	-1.12181	-0.382874	3.19029	0.656384	-0.924976	2.64529	2.30747	-1.13534	-0.33247	1.2548	-0.244331	1.65016	-0.0430031	0.129047	1.0958	3.52331	0.154785	1.18797	-1.09163
	10	18.337	0.33266	1.54062	0.727634	0.201412	1.49708	-0.192455	0.581863	-1.7368	0.907047	-0.145523	0.420055	0.747059	0.337837	1.13143	-0.438423	-1.98269	0.45385	1.11282	-1.38393	1.3385	1.53583		10	18.337	0.518678	-0.911568	-1.43583	-0.525829	3.08161	0.663086	-0.775097	2.47812	2.53651	-1.33064	-0.449757	0.55777	-0.022541	1.42181	-0.110523	0.16135	1.26247	3.63735	0.0405006	1.1539	-1.05914
	10	18.3677	0.286464	1.78852	0.904438	-0.153896	1.28349	-0.285591	0.583424	-1.78961	0.666561	-0.284042	0.515995	0.475677	0.343441	1.03758	-0.601181	-1.48234	0.334728	1.09307	-1.62559	1.44643	1.47818		10	18.3677	0.525555	-0.759651	-1.36727	-0.723717	2.86621	1.00784	-0.723915	2.48896	2.59369	-1.22132	-0.587696	1.01646	-0.258232	1.41605	-0.0198288	0.0580101	1.55254	3.52178	-0.123856	0.928276	-1.15323
	10	18.3985	0.336043	1.68781	1.15137	0.199265	1.2862	-0.22879	0.49144	-1.86554	0.910011	-0.429943	0.682518	0.452599	0.281151	1.06089	-0.806683	-0.904949	-0.0425148	0.904694	-1.36605	1.57412	1.68327		10	18.3985	0.504412	-0.805809	-1.38346	-0.51627	2.59306	1.00287	-0.847729	2.42806	2.63458	-1.47335	-0.54118	0.806808	-0.337219	1.56745	0.0973854	0.31419	1.76286	3.43901	-0.259705	0.782516	-1.17583
	10	18.4292	0.366296	1.63686	1.31929	0.38306	1.27879	-0.083744	0.909187	-1.88056	1.06646	-0.357407	0.411827	0.445461	0.0604401	0.975235	-0.836807	-0.446541	-0.00012207	0.817436	-1.26436	1.37283	1.51858		10	18.4292	0.424333	-0.821854	-1.41297	-0.631973	2.3762	1.03217	-0.963074	2.31942	2.51024	-1.73709	-0.849918	0.869884	-0.467445	1.82875	-0.0926094	0.195721	2.0201	2.99825	-0.192307	0.670078	-1.16491
	10	18.4599	0.321141	1.63097	1.2492	0.297169	0.884819	0.0874367	0.802387	-1.63956	0.887768	-0.517418	0.377281	0.383636	0.118122	0.754913	-0.986275	-0.266861	-0.283543	0.703064	-1.13261	1.62982	1.44251		10	18.4599	0.424985	-0.657822	-1.35747	-0.815262	2.45168	1.02341	-0.772221	2.1503	2.59856	-1.75209	-0.844769	0.603985	-0.359165	1.55727	-0.128967	0.272099	2.02122	3.24377	-0.130707	0.606647	-1.21076
	10	18.4906	0.317628	1.38128	1.34338	0.256901	0.798046	0.331127	0.793007	-1.80437	0.823074	-0.3974	0.333	0.329994	-0.0354767	0.602852	-0.946823	0.105858	-0.116791	0.526669	-0.854843	1.48207	1.401		10	18.4906	0.42886	-0.523697	-1.50014	-1.11562	2.37202	1.24203	-0.570389	2.19844	2.50521	-1.77998	-0.950474	0.636219	-0.218067	1.5579	-0.117676	0.450195	2.30252	3.03859	-0.0818787	0.360825	-1.22883
	10	18.5213	0.277845	1.65632	1.4023	0.172489	0.460304	0.413033	0.862816	-1.76149	0.858276	-0.508778	0.0855064	0.144253	-0.0845566	0.826805	-0.912937	0.0919724	-0.335159	0.32692	-0.710468	1.36954	1.19974		10	18.5213	0.368769	-0.387535	-1.50113	-1.09027	2.12842	1.16299	-0.830265	2.05967	2.59655	-1.72667	-0.950626	0.263142	-0.466705	1.60617	0.0507889	0.16301	2.51369	3.15437	-0.230621	0.33424	-1.47383
	10	18.5521	0.294477	1.34941	1.44693	0.108582	0.784065	0.20319	0.738968	-1.57325	0.828876	-0.233356	-0.0733147	-0.0947495	-0.136162	0.764977	-1.05595	0.531673	-0.185932	0.687408	-0.696163	1.35562	1.13872		10	18.5521	0.358815	-0.422012	-1.3085	-1.19973	1.96545	1.41348	-0.692444	1.97022	2.45808	-1.85553	-1.20615	0.467888	-0.820004	1.68063	-0.0441132	0.366272	2.5951	2.86798	-0.105618	0.3097	-1.26438
	10	18.5828	0.258226	1.37407	1.91737	0.111633	0.479279	0.0920258	0.842224	-1.39018	0.674671	-0.263432	-0.141304	-0.328106	0.0295486	0.712868	-1.07225	0.762238	-0.629311	0.439262	-0.755112	1.30332	1.0057		10	18.5828	0.358343	-0.398731	-1.08679	-0.983093	1.8199	1.40527	-0.758213	1.65899	2.52789	-1.79179	-1.38729	0.0539207	-0.720192	1.53231	-0.0769463	0.509884	2.50036	2.94393	0.140518	0.480869	-1.20395
	10	18.6135	0.338097	1.32927	2.08343	0.271984	0.279297	0.311932	1.00579	-1.24699	0.931183	-0.0552216	-0.191799	-0.18124	-0.0753784	0.409946	-0.988373	0.732758	-0.518303	0.665787	-0.509674	1.32678	1.18076		10	18.6135	0.311982	-0.327572	-1.07576	-1.00839	1.69277	1.24857	-0.745842	1.80681	2.41995	-1.87642	-1.46091	0.137009	-0.816463	1.4031	-0.169651	0.428276	2.59289	2.8092	0.190212	0.27029	-1.27842
	10	18.6442	0.253804	1.21046	2.08286	0.16367	0.115585	0.253235	0.501907	-1.46834	1.09307	-0.186127	-0.259449	-0.464371	-0.102928	0.618156	-0.979717	1.04069	-0.429443	0.48571	-0.578815	0.997883	0.982063		10	18.6442	0.263429	-0.142311	-1.02094	-0.79863	1.62861	1.20983	-0.746517	1.54347	2.27274	-2.04138	-1.5098	0.0460548	-1.05858	1.34411	-0.238174	0.354115	2.70023	2.33997	0.094574	0.233643	-0.942429
	10	18.6749	0.219319	1.1909	2.22232	-0.0774803	0.242737	0.316021	0.620354	-1.09021	1.05912	0.0785446	-0.593426	-0.682426	-0.40995	0.332172	-1.11857	1.34157	-0.725605	0.37326	-0.43396	0.71431	1.02671		10	18.6749	0.232595	-0.613331	-0.684895	-0.675652	1.74985	1.1384	-0.798111	1.30658	2.0139	-2.20889	-1.81052	0.105206	-1.15648	1.35216	-0.23629	0.339298	2.82836	2.32712	0.165943	0.346844	-0.837585
	10	18.7057	0.216824	1.22318	2.16228	-0.242405	0.0497437	0.313992	0.475182	-1.15679	0.912197	0.383789	-0.722137	-0.882843	-0.377789	1.20226	-0.877541	1.21004	-0.863224	0.309937	-0.291306	0.494877	1.01303		10	18.7057	0.129899	-0.107655	-0.78986	-0.643013	1.28533	1.09069	-0.722126	1.35777	1.81425	-2.14561	-1.78079	-0.239738	-1.09077	1.01648	-0.514397	0.0168228	2.59755	2.11786	-0.116108	0.434284	-0.982975
	10	18.7364	0.24255	1.15409	2.22059	-0.192478	0.273357	0.525581	0.346519	-1.11031	0.854271	0.334484	-0.743534	-0.847046	0.0159607	0.743778	-1.03111	1.09126	-0.804317	0.322189	0.0799255	0.58424	1.03356		10	18.7364	0.144989	-0.119267	-0.743546	-0.45583	1.31825	1.24044	-0.58585	1.29308	1.46225	-2.27928	-1.96567	-0.161205	-1.28242	0.979572	-0.812393	0.287941	2.74529	2.12749	-0.0368881	0.535252	-0.647434
	10	18.7671	0.15134	0.953362	2.24495	-0.349659	0.218544	0.187645	0.0692863	-0.729958	0.634808	0.383041	-0.907494	-0.992706	-0.359203	0.636253	-1.01311	1.14777	-0.907291	0.105576	0.236481	0.475819	0.992676		10	18.7671	0.0802496	-0.169739	-0.617485	-0.492702	1.02432	1.25299	-0.623653	0.993076	1.47906	-2.09053	-1.85537	-0.180386	-1.33226	0.897087	-0.791866	0.389793	2.67847	1.85382	-0.17794	0.240807	-0.872501
	10	18.7978	0.238862	0.987286	2.99382	-0.387878	0.397194	0.0941849	0.215759	-0.649158	0.737221	0.522526	-1.07492	-0.864365	-0.386181	0.920315	-0.926964	1.31462	-0.838459	0.272148	0.0190201	0.609486	0.821587		10	18.7978	0.0684437	-0.128399	-0.310234	-0.54673	0.813316	1.38466	-0.795815	0.887028	1.27984	-1.80013	-2.36898	0.0329475	-1.31134	0.964577	-0.813133	0.619034	2.58831	1.74399	0.206806	0.0395088	-1.11639
	10	18.8285	0.16391	0.917561	2.33722	-0.0764084	0.438763	0.1847	-0.0880814	-0.696999	0.532429	0.342995	-1.04024	-1.21738	-0.336124	0.946709	-0.700768	1.37533	-1.04908	0.429726	0.0279999	0.150425	0.799412		10	18.8285	0.0377077	0.0389252	-0.523106	-0.295326	0.82444	1.24158	-0.411961	0.90789	1.07177	-1.91181	-2.33894	-0.121902	-1.37691	0.905098	-0.603241	0.680271	2.26574	1.60325	-0.0354843	-0.0957222	-1.07041
	10	18.8593	0.14824	0.832016	1.99446	-0.0748825	0.359634	0.0947189	-0.0144463	-0.503437	0.383957	0.572655	-0.802101	-1.11195	-0.432373	0.845512	-0.93623	1.28643	-0.9879	0.249149	0.254051	0.120754	0.834793		10	18.8593	-0.0121147	-0.0715027	-0.421013	-0.295509	0.803612	1.19962	-0.483364	0.904934	1.0875	-2.01804	-2.62043	-0.190186	-1.27122	0.703842	-0.604504	0.64085	2.21973	1.50289	-0.174053	-0.126049	-1.0294
	10	18.89	0.0967335	0.793308	2.15953	-0.260468	0.147919	-0.0388184	-0.216927	-0.473087	0.457531	0.590157	-1.00757	-1.2718	-0.581661	0.929199	-1.07945	1.43237	-1.18649	0.267044	0.215515	0.170906	0.887459		10	18.89	-0.0331902	-0.180412	-0.446278	-0.309441	0.966015	0.950951	-0.383183	0.730556	0.986229	-1.73142	-2.35677	-0.439392	-1.47835	0.478966	-0.708469	0.9105	1.82217	1.56635	-0.257595	0.0248833	-0.809105
	10	18.9207	0.0754078	0.671978	2.17126	-0.436539	0.241257	0.0989418	-0.381481	-0.285275	0.224072	0.572323	-1.1356	-1.06395	-0.68288	0.781746	-1.14547	1.22251	-1.28033	0.167004	0.302116	0.273449	1.19303		10	18.9207	-0.0821644	-0.388512	-0.177612	-0.273296	0.767437	1.28022	-0.731846	0.675907	0.930058	-1.65967	-2.25176	-0.239967	-1.40163	0.415806	-0.715931	0.633324	1.74864	1.25697	-0.229523	-0.0928841	-1.18903
	10	18.9514	0.0397404	0.445362	2.25692	-0.483158	0.185062	0.328144	-0.56535	-0.567287	0.241295	0.345966	-1.35033	-1.02031	-0.253654	0.928848	-0.996201	1.288	-1.42499	0.113121	0.196655	0.0904274	1.03628		10	18.9514	-0.088932	-0.0637627	-0.512733	-0.162361	0.682178	1.49864	-0.775452	0.758686	0.611877	-1.3335	-2.20782	-0.138721	-1.6222	0.474171	-0.773232	0.533276	1.6703	1.14974	-0.359875	-0.0237198	-1.18413
	10	18.9821	0.00590477	0.505802	2.53889	-0.212605	-0.0234261	-0.0077858	-0.636909	-0.621193	0.105076	0.532314	-1.32377	-0.840393	-0.169827	0.8195	-0.949558	0.63982	-1.36501	-0.0261993	0.262341	-0.080864	0.971893		10	18.9821	-0.0988546	-0.155125	-0.22805	-0.27766	0.564636	1.67414	-0.810406	0.704971	0.568871	-0.971794	-2.37434	-0.214958	-1.56169	0.454845	-0.998348	0.472931	1.64668	1.09401	-0.268196	-0.114208	-1.1834
	10	19.0129	0.00501251	0.385303	2.53599	-0.296478	0.0733261	-0.19437	-0.672997	-0.377617	0.307217	0.569866	-1.39996	-1.08122	-0.230839	0.846298	-0.729412	0.780838	-1.37861	0.218418	0.0956879	-0.304237	0.953049		10	19.0129	-0.182114	-0.38055	-0.155239	-0.329124	0.638172	1.82743	-0.753456	0.481289	0.26424	-1.08533	-2.213	-0.179722	-1.65337	0.317863	-1.04605	0.264553	1.39496	0.924831	-0.652809	-0.362976	-0.943993
	10	19.0436	0.0526089	0.502949	2.59657	-0.455589	0.154888	-0.388969	-0.667809	-0.287098	0.433834	0.809868	-1.46348	-1.09554	0.0921936	0.749153	-0.477058	0.78141	-1.54729	0.186172	0.329964	-0.279457	1.07747		10	19.0436	-0.270525	-0.830971	-0.432686	-0.0299911	0.286713	2.1572	-1.01723	0.39119	0.226151	-0.901615	-2.36166	-0.468708	-1.6723	0.369244	-1.02837	0.0827827	1.15436	1.03213	-0.638016	-0.541779	-1.18694
	10	19.0743	0.042074	0.534554	2.35067	-0.632481	0.193798	-0.466042	-0.554916	-0.351151	0.279316	0.762913	-1.61401	-0.888828	0.258278	0.975594	-0.343246	0.569313	-1.59018	0.238506	0.403725	-0.200253	0.915928		10	19.0743	-0.262023	-0.718666	-0.267437	0.284615	0.444687	2.01448	-0.721054	0.404255	0.0424957	-1.02588	-2.76633	-0.122868	-1.63842	0.19627	-1.07861	0.232517	0.917416	1.08184	-0.729401	-0.703358	-1.087
	10	19.105	0.0479938	0.655861	2.51627	-0.587101	0.209747	-0.448383	-0.953163	-0.239319	0.391777	0.576614	-1.44482	-0.72662	0.485538	0.937218	-0.390068	0.487961	-1.59138	-0.0890961	0.32589	-0.365749	1.20871		10	19.105	-0.282497	-1.00854	-0.498238	0.0872421	0.376381	2.30728	-1.24064	0.0256691	-0.0706787	-0.924274	-2.35495	-0.099453	-1.59873	0.874428	-1.06877	0.0426178	0.780159	1.23237	-0.751072	-0.76582	-0.994919
	10	19.1357	0.043281	0.80238	2.24739	-0.954823	0.0856895	-0.510792	-0.786133	-0.170891	0.403111	0.65641	-1.38515	-0.55825	0.421436	0.579041	-0.0973396	0.511074	-1.32286	-0.0375824	0.219784	-0.319653	1.08278		10	19.1357	-0.319376	-1.29955	-0.31369	0.185635	0.515903	2.32833	-1.23871	0.0187645	-0.107716	-0.81942	-2.77293	0.0623703	-1.49759	0.705532	-1.17358	-0.0591393	0.335522	1.19546	-0.869366	-0.958035	-0.62532
	10	19.1665	-0.00792294	0.621075	2.0144	-1.1488	0.301613	-0.619045	-0.916252	0.032608	0.132282	0.616272	-1.44491	-0.420525	0.679729	0.51149	-0.108261	0.197308	-1.42198	0.00338745	0.256248	-0.519436	1.07433		10	19.1665	-0.335652	-1.19101	-0.295738	0.303017	0.166691	2.46619	-1.60861	0.332012	-0.0330429	-0.465893	-2.77732	-0.25172	-1.23722	0.109844	-1.09925	-0.178444	0.0238457	1.46095	-0.86536	-0.912113	-0.659878
	10	19.1972	0.0788704	0.745899	1.91145	-0.969631	0.597599	-0.483253	-1.05404	0.0472374	0.0864563	0.853642	-1.57811	-0.165394	0.557804	0.675171	0.171036	0.196198	-1.3796	0.214817	0.230083	-0.22263	1.14266		10	19.1972	-0.38118	-1.19635	-0.0477676	0.401356	0.454235	2.24728	-1.65886	0.399235	-0.415421	-0.716709	-2.8482	-0.148067	-1.524	-0.318989	-1.08384	-0.0535202	0.0487061	1.35086	-0.806099	-1.12993	-0.577518
	10	19.2279	0.0621969	0.824841	1.89502	-0.950115	0.726879	-0.832108	-0.943371	0.130096	-0.185505	0.7966	-1.67713	-0.0608711	0.71648	0.958855	0.3563	0.0631943	-1.35212	-0.0532379	0.140091	-0.339157	1.0292		10	19.2279	-0.365474	-1.41087	-0.142658	0.679996	0.24847	2.3188	-1.51778	0.282101	-0.527905	-0.458763	-3.01363	-0.202404	-1.36323	-0.299942	-1.0212	-0.156509	-0.0547218	1.35115	-1.04604	-0.591476	-0.382851
	10	19.2586	0.060956	0.972279	1.52076	-1.02687	0.907982	-0.769222	-0.889648	0.373737	-0.0952644	0.722748	-1.76811	0.124382	0.580177	0.767143	0.563225	-0.118755	-1.49559	0.0307961	-0.0330963	-0.371941	1.2244		10	19.2586	-0.38661	-1.31245	-0.304855	0.993134	0.214851	2.1062	-1.47453	0.321865	-0.54686	-0.588631	-3.30093	0.0283699	-1.26172	-0.365646	-0.831566	-0.160286	0.0172424	1.3773	-1.21784	-1.0313	-0.394543
	10	19.2893	0.0880318	1.06196	1.59449	-1.03874	0.889805	-0.697769	-0.977146	0.498062	-0.0778618	0.47451	-1.77755	0.161526	0.799511	0.643215	0.789635	-0.0590401	-1.35185	-0.0161133	0.0241623	-0.379269	1.1991		10	19.2893	-0.373093	-1.44236	0.462719	1.19958	0.186562	2.22582	-1.46961	0.249126	-0.567593	-0.75135	-3.07266	0.0276337	-1.0002	-0.425636	-0.794918	-0.229534	-0.403049	1.39217	-1.48938	-1.24895	-0.310226
	10	19.3201	0.180297	1.42656	1.61987	-1.00723	0.981674	-0.671463	-0.829731	0.391548	0.0807343	0.848183	-1.6045	0.339539	0.340248	0.827068	0.989326	-0.247574	-1.17233	0.0680847	0.0877571	-0.282818	1.42101		10	19.3201	-0.437473	-1.59315	-0.188808	1.00488	0.355923	1.97834	-1.58841	0.27124	-0.682209	-0.712124	-3.02642	0.124599	-0.884304	-0.526711	-0.984726	-0.270649	-0.326366	1.39735	-1.38753	-1.31696	-0.393436
	10	19.3508	0.145152	1.27214	1.46608	-0.999683	1.17009	-0.852589	-1.14049	0.721733	0.178249	0.807747	-1.99508	0.5172	0.584221	0.834866	1.13215	-0.186501	-1.30439	-0.174377	0.124199	-0.325363	1.07284		10	19.3508	-0.483349	-1.50796	-0.653961	0.694134	-0.0136948	2.25026	-1.58808	0.327805	-0.739143	-0.844143	-2.9383	0.0931892	-0.778378	-0.686871	-0.76767	-0.567741	-0.53418	1.32423	-1.51201	-0.977238	-0.247246
	10	19.3815	0.175623	1.46714	1.19712	-0.980072	1.32387	-0.867298	-1.20581	0.78941	0.337559	0.908646	-1.94545	0.558147	0.490028	0.89838	1.13651	-0.123692	-1.10991	-0.229225	0.0435066	-0.429195	1.2528		10	19.3815	-0.453078	-1.52145	-0.562157	0.688351	0.0696297	2.17641	-1.69518	0.441616	-0.618935	-0.77219	-3.19948	0.394608	-0.480877	-0.760147	-0.887402	-0.805565	-0.598267	1.54464	-1.16257	-1.05749	-0.255104
	10	19.4122	0.150099	1.26398	0.596363	-1.08196	1.17487	-0.966015	-1.30993	1.01954	0.304729	1.02056	-1.93076	0.629757	0.530872	0.954063	1.56299	-0.199516	-1.1221	-0.0994759	-0.00785828	-0.5709	1.23277		10	19.4122	-0.508484	-1.69278	-0.659637	0.757778	-0.103142	1.89193	-1.66948	0.561718	-0.907276	-0.821304	-2.98083	0.511982	-0.558331	-0.716969	-0.870808	-0.811619	-0.793388	1.32194	-1.33405	-1.20544	-0.0899773
	10	19.4429	0.166053	1.25007	0.828308	-0.948353	1.27001	-0.965611	-0.987431	0.654968	0.639088	1.37033	-1.737	0.81086	0.357674	0.74025	1.24167	-0.281021	-1.4189	-0.173721	-0.0206528	-0.632912	1.32343		10	19.4429	-0.564331	-1.78314	-0.760952	0.921787	-0.0319099	1.77617	-1.74082	0.598839	-0.614677	-0.979614	-3.31607	0.77319	-0.585255	-0.898441	-1.05352	-1.00623	-1.1007	1.28651	-1.28928	-1.47951	-0.00298691
	10	19.4737	0.117714	1.13811	0.464375	-0.899223	1.1711	-1.15228	-1.0843	0.375969	0.375217	1.29023	-1.68574	0.748783	0.253544	0.621613	1.69073	-0.388725	-1.16437	-0.0287361	-0.100769	-0.541695	1.27044		10	19.4737	-0.527594	-1.63004	-0.829449	0.865997	-0.290539	1.94835	-1.37258	0.363533	-0.496265	-0.828041	-3.39137	0.912071	-0.249409	-0.874554	-0.890594	-1.03778	-1.03522	1.19402	-1.6554	-1.34583	0.0912209
	10	19.5044	0.129553	1.11433	0.271015	-0.810318	1.09323	-1.22079	-1.19266	0.546127	0.391857	1.53247	-1.67183	0.894569	0.23695	0.747723	1.92192	-1.12027	-0.934128	0.200417	-0.00356674	-0.675755	1.26978		10	19.5044	-0.518593	-1.51889	-0.726513	0.973549	-0.339306	1.96377	-1.31255	0.138668	-0.541126	-0.483242	-3.52716	1.05022	0.00282669	-1.07288	-0.795906	-1.29737	-1.0224	1.17639	-1.48361	-1.56358	0.00726318
	10	19.5351	0.138472	1.04508	-0.0802917	-0.878448	1.1214	-1.24844	-1.23297	0.459663	0.644413	1.53378	-1.6408	0.791809	0.253998	0.833973	2.0658	-0.606163	-0.928486	0.230862	-0.0629349	-0.62006	1.08726		10	19.5351	-0.526515	-1.45548	-0.733341	0.948727	-0.31868	1.91109	-1.53474	0.260677	-0.680801	-0.730038	-3.19851	1.18225	0.19083	-1.30397	-0.711746	-1.19915	-0.982479	1.13484	-1.79438	-1.58608	0.070694
	10	19.5658	0.178105	1.0474	-0.120335	-0.607853	1.61922	-1.33265	-1.18301	0.265995	0.76054	1.43672	-1.47277	0.760517	0.147938	0.925789	1.91047	-0.617073	-1.01279	0.122787	0.0284042	-0.38422	1.26702		10	19.5658	-0.480095	-1.24165	-0.755459	0.853542	-0.161076	1.7462	-1.87414	0.452663	-0.624504	-0.819408	-3.21169	1.44698	0.211548	-0.965878	-0.53323	-1.20762	-0.902393	1.15202	-1.54815	-1.79848	0.178841
	10	19.5965	0.162254	1.04303	-0.482792	-0.715927	1.55595	-1.27085	-1.14467	0.305096	0.702698	1.49352	-1.43811	0.835514	-0.0165863	0.842064	2.12098	-0.589142	-0.969162	0.135685	0.0195847	-0.441822	1.26003		10	19.5965	-0.432963	-1.52066	-0.716198	0.811363	-0.455677	1.50327	-1.44417	0.373642	-0.486004	-0.72887	-3.09458	1.57356	0.303761	-0.781219	-0.380508	-0.961182	-1.07285	1.18767	-1.74675	-1.52297	0.499107
	10	19.6273	0.171302	1.04972	-0.51226	-0.492054	1.76084	-1.46803	-0.938904	0.288254	0.68956	1.64681	-1.30483	0.711689	-0.128223	0.722202	2.23769	-0.908375	-0.905949	-0.0783653	0.123089	-0.353535	1.28672		10	19.6273	-0.469448	-1.31234	-0.524559	0.713375	-0.287781	1.40649	-1.48708	-0.111076	-0.805855	-0.366879	-3.30274	1.59769	0.436901	-0.809116	-0.641903	-1.33115	-0.865631	0.996773	-1.68088	-1.45323	0.440025
	10	19.658	0.0787649	0.836868	-0.486736	-0.39349	0.954247	-1.56651	-0.934456	0.166359	0.619785	1.30522	-1.13881	0.542267	0.00181961	0.439892	2.19106	-0.989292	-0.665344	0.152725	-0.0866013	-0.61256	1.23885		10	19.658	-0.481761	-1.14513	-0.56892	0.721943	-0.302849	1.35575	-1.45083	0.0517769	-0.644695	-0.637672	-3.18409	1.71906	0.380173	-0.900635	-0.559013	-1.26025	-0.94772	1.03801	-1.7994	-1.81051	0.30978
	10	19.6887	0.0889713	0.873356	-0.505524	-0.268406	0.876881	-1.69983	-0.760574	-0.0434341	0.713673	1.31956	-1.03159	0.790451	0.11097	0.637718	2.1108	-1.34616	-0.866848	0.166061	0.0169449	-0.309628	0.99501		10	19.6887	-0.44815	-1.2387	-0.790253	0.710835	-0.320602	1.28895	-1.04311	-0.137302	-0.746071	-0.138546	-3.33614	2.32532	0.376293	-1.02322	-0.339874	-1.54011	-1.24662	1.13465	-1.59721	-1.74657	0.445274
	10	19.7194	0.106341	0.838383	-0.785782	-0.0708046	1.46893	-1.8318	-1.01753	0.227013	0.411266	1.45864	-0.799942	0.659058	0.0879974	0.601467	2.20968	-1.34261	-0.686672	0.0776558	-0.0582123	-0.498253	1.17833		10	19.7194	-0.446532	-1.15974	-0.958492	0.644672	-0.412968	1.2504	-1.01966	-0.129986	-0.658176	-0.0622177	-3.17746	2.22771	0.254288	-1.00769	-0.299961	-1.3627	-1.36883	1.51973	-1.88203	-1.77525	0.447704
	10	19.7501	0.123698	0.852032	-0.808315	0.253101	1.72397	-2.04356	-0.996651	0.170963	0.296192	1.20401	-0.747803	0.795372	0.0114517	0.690502	2.17882	-1.28882	-0.510815	-0.0179825	-0.016243	-0.472839	1.20058		10	19.7501	-0.391386	-0.881443	-1.01427	0.785194	-0.311279	1.03194	-0.946495	-0.0253258	-0.49292	0.00809097	-2.92329	2.49971	0.336231	-0.807423	-0.564236	-1.4213	-1.20992	1.01043	-1.87959	-1.72565	0.703812
	10	19.7809	0.17197	0.83284	-0.52771	0.192207	1.527	-1.77918	-0.894924	0.171154	0.424641	1.23258	-0.322212	0.502991	-0.0946541	0.553673	2.24918	-1.35596	-0.289516	0.163334	0.156944	-0.31076	1.00777		10	19.7809	-0.388786	-1.11495	-0.842728	0.728382	-0.445938	0.905701	-1.04577	0.131012	-0.740326	-0.0686531	-2.84396	2.61316	0.289524	-1.0009	-0.158779	-1.21877	-1.24778	1.38728	-1.86885	-1.84439	0.611012
	10	19.8116	0.124688	0.940067	-0.478226	0.228855	1.45737	-1.87214	-0.875389	0.0869217	0.362984	1.27578	-0.222755	0.517532	-0.0483665	0.363548	1.98375	-1.73217	-0.315884	0.156189	0.149364	-0.496334	1.01266		10	19.8116	-0.366817	-0.945618	-1.00997	0.789581	-0.481712	0.923294	-0.653225	0.0459442	-0.906193	0.0345726	-2.8651	2.63244	0.289238	-0.846729	-0.201649	-1.44336	-1.1628	1.51172	-1.95582	-1.6923	0.601334
	10	19.8423	0.217465	1.27034	-0.388817	0.435238	1.45675	-1.71972	-0.685356	0.503929	0.21587	1.56281	-0.0155945	0.411114	-0.301735	0.220173	2.0144	-1.58291	-0.196606	0.219791	0.234741	-0.348297	1.04318		10	19.8423	-0.364347	-0.961552	-1.10693	0.783791	-0.538471	0.950893	-0.521141	-0.112087	-1.09098	0.088192	-2.85524	2.94263	0.418018	-1.16972	-0.398907	-1.05872	-1.27885	1.63073	-1.94871	-1.59721	0.537327
	10	19.873	0.207041	1.52637	-0.337715	0.432987	1.78167	-1.75415	-0.824497	0.544342	0.0423012	1.38417	-0.099968	0.222904	-0.219696	0.290508	1.76179	-1.71471	-0.0498199	0.273579	0.223885	-0.0410614	0.697929		10	19.873	-0.354445	-0.951599	-0.982105	0.448586	-0.342346	0.90403	-0.57233	-0.30825	-1.098	0.227535	-2.65998	3.01607	0.339817	-1.30504	-0.242241	-0.7271	-1.16462	1.64047	-1.84743	-1.63232	0.167957
	10	19.9037	0.203136	1.3336	-0.481941	0.705643	1.64762	-1.66162	-0.836597	0.549355	-0.0960503	1.39618	-0.00881195	0.0968513	-0.192665	0.395485	1.43123	-1.77699	0.0305061	0.2831	0.338787	0.0898781	0.819176		10	19.9037	-0.331853	-0.951862	-0.985554	0.80476	-0.58284	0.745007	-0.457104	-0.0660248	-0.963604	-0.254383	-2.59275	3.17459	0.412407	-1.37603	-0.273376	-0.555241	-1.36222	1.93685	-1.71048	-1.90759	0.3284
	10	19.9345	0.148723	1.79475	-0.741653	0.48513	1.6286	-1.97487	-0.697586	0.651089	-0.234432	1.38617	-0.106384	-0.0496864	-0.30806	0.6077	1.08152	-1.79831	0.0939827	0.0710526	0.332493	0.0673141	0.685638		10	19.9345	-0.31233	-1.09657	-0.917686	0.563148	-0.378811	0.787365	0.00244904	0.19173	-0.940361	-0.097847	-2.63307	3.14	0.203178	-1.37286	-0.29076	-0.596508	-1.47865	1.8334	-1.65647	-1.83433	0.326054
	10	19.9652	0.211014	1.91381	-0.620033	0.478619	1.54314	-1.91815	-0.62468	1.01457	-0.0994835	1.4535	0.12904	-0.0536385	-0.0517845	0.611435	0.976768	-2.05951	0.285946	0.0723991	0.421352	0.00571442	0.741249		10	19.9652	-0.279703	-1.12963	-0.959911	0.726105	-0.13715	0.704037	-0.190739	0.0978508	-0.782154	-0.0118713	-2.46218	3.25424	0.266376	-1.46631	-0.038353	-0.705013	-1.41047	1.92052	-1.7935	-1.75012	0.274197
	10	19.9959	0.198365	2.01804	-0.502605	0.51487	1.51588	-2.01856	-0.571049	1.06238	-0.148098	1.52116	-0.0339508	-0.192928	-0.270653	0.807114	1.34683	-2.00478	0.402748	-0.0267563	-0.0437393	-0.232441	0.823826		10	19.9959	-0.337881	-1.07532	-0.900997	0.611427	-0.362217	0.492107	0.0259819	0.187389	-0.99213	-0.023983	-2.19657	3.04655	0.0144386	-1.35912	-0.030407	-1.31225	-1.4761	1.96951	-1.81331	-1.86193	0.299301
	20	-0.00286721	-0.375012	-1.12385	0.0890541	-2.23563	-0.704277	-1.03206	-0.563843	0.992531	-0.860165	0.635536	-1.52853	0.832043	-0.505459	-2.17207	-0.0556908	1.23991	1.75632	-1.15953	0.0208244	-1.15006	0.0246964		20	-0.00286721	0.142131	-1.16453	-0.137794	-2.20768	0.987442	0.559326	1.71377	0.0541153	2.23384	-0.589703	0.468155	-0.986465	-0.16172	0.54612	1.73062	1.19912	0.0663605	2.74626	-2.00173	-1.2248	-0.988075
	20	0.0278529	-0.400631	-1.12795	-0.154396	-2.2541	-0.530399	-0.960079	-0.375038	1.08466	-1.08375	0.391022	-1.82958	0.811157	-0.544186	-1.89516	-0.277077	1.58242	1.80793	-1.27669	0.0193138	-1.29936	-0.101364		20	0.0278529	0.227225	-1.15892	0.169373	-2.14249	1.26704	0.694405	1.9828	-0.00512314	2.33128	-0.760426	0.55452	-0.9729	-0.314308	0.974773	1.79272	1.57833	0.0495148	2.82036	-1.71597	-1.58061	-1.01987
	20	0.058573	-0.360843	-0.992802	-0.117344	-2.37965	-0.54089	-0.982014	-0.504967	0.854507	-0.977489	0.376026	-1.77398	1.40728	-0.457703	-1.91255	-0.136551	1.39057	2.22665	-0.995621	-0.172443	-1.26269	-0.265205		20	0.058573	0.239352	-1.06238	0.2295	-2.20866	1.27382	0.994534	2.17559	-0.15733	2.1841	-0.942074	0.673561	-0.928909	-0.420021	0.876839	1.61764	1.61584	-0.095253	3.11665	-1.96247	-1.1601	-1.03381
	20	0.089293	-0.341432	-0.693195	-0.201469	-1.97482	-0.478928	-0.99197	-0.318748	0.972095	-1.21188	0.168388	-1.84432	1.36263	-0.379551	-1.85813	-0.218147	1.05578	2.29353	-0.797939	-0.0218277	-1.26395	-0.426201		20	0.089293	0.258613	-0.985168	0.386417	-2.23001	1.44413	1.11167	2.43438	-0.327774	1.71559	-0.905632	0.427635	-0.80217	-0.705887	1.35649	1.60941	1.73149	-0.152077	3.17723	-1.9843	-1.12685	-1.00229
	20	0.120013	-0.342584	-0.795952	-0.473003	-1.98425	-0.799072	-1.00156	-0.251553	0.812546	-0.90984	0.115292	-1.80177	1.41765	-0.473637	-1.8341	0.00967026	1.03374	2.35886	-0.754841	0.131752	-1.40435	-0.247265		20	0.120013	0.269386	-0.915382	0.289692	-2.17207	1.13934	1.34708	2.35874	-0.0193787	2.20492	-1.08271	0.390083	-1.09505	-0.654015	1.31204	1.69819	1.63152	-0.302605	3.25488	-1.88174	-1.12658	-0.989243
	20	0.150733	-0.382919	-0.677898	-0.380283	-1.96428	-0.475204	-1.1018	-0.434166	0.655937	-0.824154	0.274139	-1.90841	1.41923	-0.448334	-1.95779	-0.17136	0.954468	2.38249	-0.924667	-0.136341	-1.63436	-0.305618		20	0.150733	0.384966	-1.12138	0.556442	-2.19681	1.1404	1.78603	2.49014	-0.053093	2.65459	-1.14406	0.405197	-0.876484	-0.754093	1.25625	1.96978	1.92754	-0.0227509	3.33651	-1.97396	-0.821087	-0.859852
	20	0.181453	-0.363338	-0.725559	-0.232891	-2.05783	-0.233521	-1.16822	-0.524742	0.846363	-0.884808	0.199574	-1.96236	1.61857	-0.171959	-1.80005	-0.124928	0.703899	2.18995	-0.917553	0.14452	-1.63187	-0.533356		20	0.181453	0.366855	-1.13013	0.757729	-2.07924	1.069	1.93991	2.5512	-0.376652	2.33871	-1.35266	0.556786	-0.864189	-1.05988	1.27145	1.86369	1.88021	0.0407181	3.62348	-1.82213	-0.751343	-1.11957
	20	0.212173	-0.360515	-0.493496	-0.428848	-2.0131	-0.312798	-1.06578	-0.496861	0.690407	-0.916924	0.211678	-2.11961	1.65037	-0.165863	-1.66396	-0.00723267	0.82547	2.17061	-0.95216	0.0311012	-1.57422	-0.579082		20	0.212173	0.436477	-1.21855	0.781738	-2.01151	0.783524	2.11153	2.62417	-0.400333	2.44314	-1.04489	0.538872	-1.01623	-0.667606	1.64182	1.61634	1.92987	0.100296	3.77821	-1.57437	-0.659321	-1.02715
	20	0.242893	-0.397402	-0.404636	-0.512478	-1.76778	-0.37812	-0.914249	-0.622349	0.535408	-0.92255	0.151951	-2.30129	1.71817	-0.131855	-1.86655	-0.279888	0.601894	2.00614	-0.625881	-0.28524	-1.32114	-0.627602		20	0.242893	0.430584	-0.907242	0.738976	-1.84095	0.623329	2.12051	2.62467	-0.607544	2.2109	-1.34217	0.544624	-1.16116	-0.711689	1.77724	1.58131	1.86496	0.322765	3.89043	-1.65284	-0.167538	-1.2969
	20	0.273614	-0.46915	-0.49894	-0.558445	-1.63183	-0.775368	-1.10077	-0.613266	0.3694	-0.945923	0.0303192	-2.20271	1.63939	0.0203514	-1.74057	-0.367615	0.467175	1.69977	-0.726055	-0.222775	-1.51323	-0.711895		20	0.273614	0.481632	-1.30204	0.773403	-2.11282	0.773415	2.17203	2.55472	-0.510166	2.32346	-0.881931	0.505215	-1.22507	-0.566628	2.06721	1.38293	2.23712	0.413071	3.79363	-1.82425	0.107967	-1.04862
	20	0.304334	-0.390155	-0.39846	-0.496216	-1.38802	-0.688175	-0.963848	-0.597878	0.477768	-0.834454	0.191231	-1.97646	1.53293	0.0312004	-1.9623	-0.265728	0.510559	1.93127	-0.672134	0.103771	-1.2863	-1.05186		20	0.304334	0.466716	-1.04673	0.844803	-2.0695	0.52858	2.37904	2.52466	-0.461456	2.19218	-1.35836	0.621624	-1.425	-0.776516	1.92377	1.25679	2.42578	0.442833	4.25602	-1.76877	0.0678177	-1.22325
	20	0.335054	-0.369923	-0.34726	-0.116138	-1.34806	-0.403324	-0.931469	-0.577877	0.404598	-1.03775	0.177425	-2.43869	1.93126	-0.134312	-2.11897	-0.338837	0.627296	2.1332	-0.510597	-0.0825043	-1.23822	-1.04823		20	0.335054	0.523388	-1.02385	1.00288	-2.31373	0.618607	2.48134	2.57895	-0.4842	2.11079	-0.888512	0.546452	-1.48042	-0.800404	2.07989	1.22282	2.29237	0.553165	4.22663	-1.48442	0.305344	-1.07595
	20	0.365774	-0.379686	-0.177948	-0.0460701	-1.44581	-0.395527	-1.08504	-0.670166	0.310795	-0.780605	-0.0142403	-2.28383	1.83172	-0.0360107	-2.18111	-0.222645	0.595371	1.81939	-0.423084	-0.341499	-1.03421	-1.01318		20	0.365774	0.526661	-1.05919	0.852406	-2.26754	0.398357	2.51959	2.3689	-0.638012	1.94523	-1.36554	0.536186	-1.41265	-0.840126	2.2975	1.35168	2.34313	0.89122	4.38006	-1.22628	0.389179	-0.930878
	20	0.396494	-0.389513	-0.088932	-0.209743	-1.17255	-0.338902	-1.21492	-0.771599	0.0523834	-0.619328	0.214046	-2.54348	2.04466	-0.0406952	-1.9726	-0.264114	0.524395	1.75957	-0.387917	-0.236462	-1.31681	-1.20726		20	0.396494	0.528587	-1.19138	0.660717	-2.37739	0.420521	2.66516	2.39584	-0.458237	1.88599	-1.13841	0.608009	-1.46529	-0.921474	2.55654	1.13066	2.36524	1.05043	4.2274	-1.21653	0.487854	-1.1139
	20	0.427214	-0.416101	0.0827637	-0.387386	-1.30614	-0.266472	-1.29853	-0.572464	0.378174	-0.479767	0.0714493	-2.74124	1.92716	-0.0227089	-2.29935	-0.311108	0.442226	1.7379	-0.428829	-0.191566	-1.36821	-1.28791		20	0.427214	0.519749	-1.26648	0.84082	-2.09929	0.172256	2.76854	2.28011	-0.633579	1.59339	-1.21987	0.790031	-1.60981	-0.874004	2.66441	0.97953	2.40232	1.26115	4.21016	-1.10128	0.644016	-1.40741
	20	0.457934	-0.470101	-0.0335121	-0.335835	-1.33507	-0.0592613	-1.38497	-1.10059	0.0811348	-0.361034	0.108521	-2.64423	1.80064	-0.00664902	-2.51467	0.0132141	0.394066	1.73718	-0.54327	-0.653278	-1.17819	-1.38622		20	0.457934	0.541271	-1.33182	0.732323	-2.39935	0.12624	2.81149	2.6542	-0.744961	1.61235	-1.04434	0.494549	-1.53951	-0.757515	2.50772	1.04667	2.48569	1.47642	4.18385	-0.846249	0.435055	-1.07739
	20	0.488654	-0.506685	-0.24387	-0.272182	-1.12187	0.272259	-1.13805	-0.878521	0.0272293	-0.528431	0.316399	-2.81327	1.57056	0.0261345	-2.83078	-0.0165329	0.0682297	1.51812	-0.544487	-0.743004	-1.27392	-1.5277		20	0.488654	0.604725	-1.22018	0.482025	-2.44661	0.160011	2.81819	2.32148	-0.383873	1.45342	-0.973785	0.616402	-1.64336	-0.619968	3.02896	1.26086	2.7362	1.40186	4.49638	-0.862865	0.550819	-1.08147
	20	0.519374	-0.431576	-0.0937157	-0.140423	-0.938366	0.113529	-1.38418	-0.726349	0.0752487	-0.475277	0.481361	-2.8411	1.62377	0.245384	-2.69638	-0.0505638	0.22654	1.5727	-0.399185	-0.652824	-1.20033	-1.37136		20	0.519374	0.564308	-1.13253	0.501225	-2.68787	0.0642281	2.56582	2.31964	-0.375385	1.26869	-1.32522	0.935989	-1.54781	-0.940521	2.88	1.44794	2.70135	1.46613	4.52459	-0.66288	0.587154	-1.30439
	20	0.550094	-0.488997	-0.0705643	-0.103374	-1.12626	0.171005	-1.32727	-0.766689	-0.0834541	-0.367081	0.171394	-2.70922	1.31593	0.0559349	-2.50112	-0.0235672	0.387589	1.27832	-0.668129	-0.707066	-1.04166	-1.66464		20	0.550094	0.627718	-0.861858	0.419163	-2.58364	0.100491	2.38556	2.41444	-0.347252	1.25818	-1.39128	0.766369	-1.55598	-0.755367	2.88826	1.78002	3.21648	1.40473	4.72279	-0.588863	0.606453	-1.32433
	20	0.580814	-0.412673	-0.00367355	-0.0299988	-1.03048	0.212704	-1.53804	-0.93568	-0.310524	0.0594482	0.277607	-2.73428	1.68156	0.210655	-2.08854	0.157703	0.468094	1.58303	-0.617863	-0.362083	-1.60263	-1.65048		20	0.580814	0.591473	-0.930283	0.565575	-2.43229	-0.111248	2.10913	2.28457	-0.327023	1.07763	-1.19778	0.421471	-1.55846	-0.578903	2.94378	1.82048	3.04236	1.44424	4.59904	-0.629047	0.503693	-1.21749
	20	0.611534	-0.411131	-0.0880241	0.182156	-0.931705	0.139519	-1.72339	-0.830219	-0.210697	0.0834961	0.561325	-2.90511	1.49972	0.137463	-2.38144	0.153091	0.309143	1.40919	-0.576885	-0.347755	-0.814404	-1.8881		20	0.611534	0.651457	-1.07695	0.459717	-2.32573	-0.284126	1.94984	2.27427	-0.0367355	1.05314	-1.25554	0.342159	-1.45966	-0.564419	3.2142	2.04874	3.18827	1.46383	4.84885	-0.239437	0.69828	-1.26958
	20	0.642254	-0.357568	-0.0321159	0.0615654	-1.06131	0.223671	-1.63838	-0.704334	-0.46397	0.0958328	0.943871	-2.8408	1.57151	0.289944	-2.25686	-0.0601501	0.273903	1.72245	-0.357231	-0.292526	-0.621143	-2.00528		20	0.642254	0.61693	-1.13592	0.608444	-2.47624	-0.466969	1.7025	1.9821	0.0467262	1.09592	-1.37542	0.325462	-1.43214	-0.291325	3.06213	1.97351	3.27576	1.56211	4.76402	-0.272984	0.621773	-1.23087
	20	0.672975	-0.393232	0.160202	0.12011	-0.765503	0.179398	-1.52098	-0.759773	-0.675056	0.108936	0.894363	-2.82521	1.30996	0.137451	-2.32359	0.158348	-0.129929	1.43975	-0.434242	-0.424088	-0.455177	-2.0596		20	0.672975	0.642774	-0.986923	0.567734	-2.30689	-0.260773	1.78135	1.78522	-0.0874825	0.957352	-1.64596	0.315338	-1.45112	-0.153519	3.06077	1.64915	3.19448	1.77101	4.96989	0.0371895	0.640202	-0.981552
	20	0.703695	-0.344287	-0.0816116	0.241856	-0.817192	0.0373802	-1.52666	-0.639492	-0.490864	0.450623	0.775307	-2.72639	1.22348	0.201668	-2.09078	0.357285	-0.0327034	1.29665	-0.41853	-0.451553	-0.309742	-1.88446		20	0.703695	0.606825	-0.907864	0.790562	-2.22458	-0.306408	1.57784	1.76257	0.147907	0.753956	-1.50001	0.0921326	-1.49201	-0.340996	3.15523	2.07781	3.0856	1.69152	4.57449	-0.0255623	0.477386	-1.25308
	20	0.734415	-0.383915	-0.225822	0.314671	-0.673691	0.127216	-1.70683	-0.614933	-0.450405	0.484421	0.842422	-2.91056	0.943825	0.221615	-2.05954	0.588264	0.206646	1.23638	-0.855968	-0.504433	-0.385967	-2.25561		20	0.734415	0.598413	-0.474873	0.643196	-2.29005	-0.390079	1.61309	1.64355	0.0655823	0.952118	-1.72559	0.230976	-1.0892	-0.251747	3.07568	1.82265	3.09515	1.38856	4.54373	-0.0391655	0.372826	-1.21815
	20	0.765135	-0.377668	-0.143497	0.388912	-0.72913	0.19289	-1.57708	-0.56271	-0.577255	0.0250587	0.858803	-2.9116	0.917358	0.210178	-1.98157	0.756935	0.147327	1.29182	-0.906311	-0.169773	-0.370682	-2.41304		20	0.765135	0.557538	-0.607933	0.775455	-2.30215	-0.56274	1.50732	1.4239	0.173183	0.489738	-1.56775	0.146561	-1.01076	-0.383053	2.87854	1.94899	3.22847	1.44127	4.40709	0.0415764	0.237762	-1.11472
	20	0.795855	-0.373666	-0.0538597	0.592045	-0.52681	0.249882	-1.54086	-0.575691	-0.679573	0.672535	0.925106	-2.81555	0.827713	0.146416	-1.86543	0.525909	-0.0113411	1.00188	-0.904964	-0.361549	-0.503922	-2.57526		20	0.795855	0.652905	-0.81892	0.622295	-1.7718	0.0298576	1.56766	1.41838	0.197701	0.474327	-1.6224	0.113876	-0.747604	-0.0871658	2.91042	2.01841	3.50472	1.42661	4.45422	0.0359116	0.29789	-0.966293
	20	0.826575	-0.309532	-0.196854	0.613834	-0.544594	0.426502	-1.59516	-0.544388	-0.803047	0.995552	1.36285	-2.58945	0.813995	0.0634079	-1.91364	0.709976	-0.277367	0.989723	-0.90736	-0.137447	-0.447834	-2.20934		20	0.826575	0.555759	-0.810741	0.695824	-1.54077	-0.098484	1.4583	1.09388	0.320049	0.768997	-1.75849	-0.196701	-0.858372	-0.300583	2.43201	2.03796	3.27753	1.25608	4.10887	0.242809	0.300838	-1.31383
	20	0.857295	-0.319031	-0.306774	0.858311	-0.524044	0.215858	-1.68356	-0.488159	-1.17017	1.13383	1.24435	-2.55204	0.659668	0.119022	-1.79016	1.01932	-0.153511	0.659073	-0.93895	-0.179447	-0.178146	-2.32508		20	0.857295	0.601138	-0.643276	0.832367	-1.6866	-0.287796	1.45595	1.26297	0.32423	0.628132	-1.65883	-0.5163	-0.479218	-0.0393372	2.5023	1.8067	3.69111	1.18732	4.23919	0.438984	0.0249405	-1.06009
	20	0.888015	-0.317237	-0.368145	0.696472	-0.576988	0.202667	-1.63645	-0.286465	-1.22708	0.90089	1.30009	-2.47556	0.619717	0.151314	-1.49684	1.2944	-0.0392113	0.484249	-0.945103	-0.479496	-0.0322342	-2.43098		20	0.888015	0.56312	-0.931477	0.853157	-1.59813	-0.170662	1.68053	0.957706	0.457542	0.142521	-1.69977	0.283295	-0.593895	-0.157936	2.24221	1.94793	3.42773	1.20007	4.20839	0.319691	-0.0797729	-1.22673
	20	0.918735	-0.260774	-0.312546	0.803474	-0.438751	0.336784	-1.63394	-0.289768	-1.13969	0.968086	1.60142	-2.16563	0.251553	0.418571	-1.37026	1.30157	-0.0107841	0.800419	-1.17304	-0.518547	-0.0771523	-2.56725		20	0.918735	0.541299	-1.15098	0.617001	-1.41678	0.0571098	1.58345	1.10529	0.441437	0.0467567	-1.86138	-0.1133	-0.248356	-0.206291	2.28302	1.8907	3.31518	1.04004	4.04167	0.39888	0.104523	-1.10199
	20	0.949455	-0.295567	-0.608173	0.839775	-0.627876	0.413483	-1.43257	-0.122074	-1.24005	0.983646	1.70892	-1.91097	0.061676	0.225239	-1.23042	1.24956	-0.175148	0.458118	-1.2913	-0.389622	-0.24239	-2.58117		20	0.949455	0.476986	-1.2485	0.861397	-1.3387	-0.109554	1.17921	0.902679	0.34943	0.242325	-1.95755	-0.571125	-0.225456	0.0774155	2.29605	1.85229	3.01832	1.31299	3.93418	0.453968	-0.256393	-1.23325
	20	0.980175	-0.237391	-0.533176	1.10461	-0.439762	0.492535	-1.53226	-0.259403	-1.11604	0.969944	1.71133	-1.70084	-0.175201	0.198616	-1.05329	1.55138	0.012001	0.618553	-1.18342	-0.344486	-0.315929	-2.75298		20	0.980175	0.485727	-1.17647	0.73764	-1.75039	0.182232	1.0671	0.84708	0.567814	0.418491	-1.90806	-0.352161	-0.0438538	-0.175079	2.17046	1.62812	2.6076	1.29598	4.05723	0.560734	-0.303783	-0.716145
	20	1.0109	-0.265913	-0.694778	1.07323	-0.495979	0.716099	-1.39058	0.0162621	-1.24598	0.953487	1.64431	-1.5188	-0.232613	-0.0489578	-1.31352	1.45601	-0.250092	0.561214	-1.22705	-0.261795	-0.15601	-2.90273		20	1.0109	0.438104	-1.31978	0.979256	-1.65471	0.148113	0.94875	0.499969	0.423782	-0.0467987	-1.78003	-0.426224	0.0222359	-0.193832	1.99829	1.59202	2.72378	1.13539	3.75697	0.752636	-0.448082	-0.349648
	20	1.04162	-0.20112	-0.528255	0.927658	-0.271622	0.943253	-1.32231	-0.296494	-1.21801	1.06965	1.45613	-1.12584	-0.334396	0.332287	-1.31461	1.84196	-0.198204	0.595901	-1.13995	-0.516903	-0.0308495	-2.8918		20	1.04162	0.413612	-1.02966	1.04252	-1.39169	0.277336	0.743374	0.490742	0.0655594	-0.139576	-1.79488	-0.536697	0.322109	-0.255402	1.92432	1.53028	2.67752	1.17587	3.42307	0.786755	-0.706718	-0.3326
	20	1.07234	-0.199496	-0.66692	0.984695	-0.0973129	0.924393	-1.36386	0.00543976	-1.00365	0.911152	1.52119	-1.13649	-0.517658	0.22575	-1.51674	1.96899	-0.0522919	0.428761	-1.22073	-0.501606	-0.124561	-2.75848		20	1.07234	0.334991	-1.45383	1.19973	-1.62395	-0.0123978	0.848862	0.258629	0.290207	-0.291687	-1.80838	-0.624088	0.623909	-0.356922	1.69987	1.41391	2.41458	1.20037	3.36547	0.354607	-0.464142	-0.334938
	20	1.10306	-0.175885	-0.597645	0.911827	-0.294613	0.940556	-1.15496	-0.0024147	-0.999817	0.709019	1.77647	-1.11298	-0.578011	0.217022	-1.21941	2.18518	-0.0609703	0.595329	-1.33041	-0.739285	-0.0323906	-2.73019		20	1.10306	0.24824	-1.29334	1.16817	-1.73899	-0.0817223	0.896702	0.167755	0.0575104	-0.175125	-1.99156	-0.473598	0.552757	-0.498295	1.66748	1.1895	2.13762	0.943432	2.977	0.336605	-0.647465	-0.229641
	20	1.13378	-0.141172	-0.671738	1.08327	-0.201859	1.34428	-0.919422	-0.0459251	-0.914963	0.794445	1.81674	-1.23656	-0.600746	0.154579	-0.992001	2.20953	-0.372272	0.510586	-1.1945	-0.695789	-0.0900269	-2.80107		20	1.13378	0.239397	-1.70351	1.06079	-1.37741	0.219757	0.65443	0.426346	0.0334435	-0.300095	-1.89866	-0.536541	0.374107	-0.400814	1.53194	1.43515	1.85251	1.01082	2.69112	0.384422	-0.746609	0.0767403
	20	1.1645	-0.103602	-0.423981	1.11409	-0.192379	1.20338	-1.16697	0.095253	-1.01814	1.1592	1.84871	-0.914642	-1.00655	0.0758438	-0.848476	2.07897	-0.227432	0.731609	-1.10886	-0.530979	-0.17506	-2.76561		20	1.1645	0.228674	-1.59716	1.25455	-1.54662	0.106892	0.593967	0.366215	-0.223873	-0.213913	-1.73792	-0.418167	0.84626	-0.316818	1.46242	1.30242	1.63991	0.810158	2.57819	0.204727	-0.770519	0.232769
	20	1.19522	-0.096195	-0.439503	0.852161	0.041748	1.26196	-1.08263	0.0564537	-0.940727	1.08938	1.81019	-0.764732	-1.04194	-0.0842285	-0.858822	2.38747	-0.360233	0.583065	-0.974487	-0.49226	-0.0412102	-2.92555		20	1.19522	0.239495	-1.62863	1.43341	-1.47381	0.218231	0.364227	0.180771	-0.27425	-0.304718	-1.70524	-0.399212	0.982681	-0.0276337	1.45797	1.35723	1.52208	0.881657	2.47256	0.219318	-0.584984	0.0982323
	20	1.22594	-0.047662	-0.357632	0.928215	0.0163422	1.24157	-0.959354	-0.112038	-0.628143	0.974785	1.6482	-0.501438	-1.01221	0.286377	-0.881409	2.45007	-0.490292	0.526894	-0.719772	-0.582573	0.00468445	-2.78553		20	1.22594	0.159949	-1.9287	1.45532	-1.15833	-0.0270386	0.215691	0.246792	-0.259777	-0.215622	-2.03525	-0.479439	0.829903	-0.405811	1.18959	1.31716	1.39505	0.821148	2.19884	0.394611	-0.747227	0.392059
	20	1.25666	-0.0325569	-0.272682	0.946373	0.138077	1.58657	-0.691422	0.0585136	-0.629089	0.894741	1.47423	-0.495869	-1.28859	-0.00955582	-0.994362	2.48476	-0.56123	0.680256	-0.449802	-0.619541	0.0520248	-2.95453		20	1.25666	0.219692	-1.83936	1.33432	-1.13365	-0.0644455	0.111351	0.386852	-0.297146	-0.370483	-1.46548	-0.395206	1.16142	-0.0856972	1.05103	1.48664	1.18227	0.977776	2.15335	0.389	-0.706528	0.517838
	20	1.28738	0.0367289	-0.162045	0.670292	-0.093689	1.60574	-0.938305	0.119976	-0.776871	1.1946	1.74757	-0.350021	-1.20675	-0.128124	-0.979675	2.48719	-0.230473	0.809311	-0.253178	-0.50267	0.417995	-2.69629		20	1.28738	0.236723	-1.66466	1.48328	-1.1762	-0.225655	0.0866852	0.494095	-0.297161	-0.147385	-1.73017	-0.18615	1.39106	-0.0369186	0.865742	1.52445	0.855434	1.02689	2.10308	0.440128	-0.499035	0.426952
	20	1.3181	0.0898132	0.197838	0.954536	0.0338669	1.66827	-0.850243	0.411861	-0.1348	1.12403	1.79903	-0.59684	-1.2558	-0.315083	-1.10636	2.40026	-0.351494	0.605583	-0.184212	-0.235188	0.511131	-2.88012		20	1.3181	0.174198	-1.79207	1.22125	-1.22232	-0.308937	0.205288	0.271244	-0.147171	-0.246269	-1.68487	-0.214596	1.29496	-0.0443573	0.759266	1.58009	0.762211	1.10825	2.07491	0.399261	-0.786282	0.254101
	20	1.34882	0.0881769	0.0403481	0.900002	-0.185528	1.50716	-0.630848	0.216988	-0.183868	1.08458	1.74626	-0.713894	-1.21983	-0.104984	-1.08337	2.56533	-0.518711	0.40395	0.406384	-0.333904	0.660286	-2.79279		20	1.34882	0.176986	-1.81605	1.19094	-1.23417	-0.115395	0.152748	0.115818	-0.0770302	-0.32547	-1.64435	0.00779343	1.536	0.0403633	0.783176	1.35211	0.585266	1.17069	2.09839	0.280743	-0.801506	0.239651
	20	1.37954	0.0735889	-0.240185	1.09735	-0.488804	1.81369	-0.551884	0.0762024	-0.0933151	1.09854	1.82491	-0.65387	-1.03468	-0.115368	-1.10579	2.43757	-0.726826	0.353527	0.53191	-0.584648	0.645374	-2.81194		20	1.37954	0.179748	-1.96357	1.04692	-1.46484	-0.283981	0.176067	0.216503	-0.0383568	-0.102814	-1.6385	0.0372238	1.49321	0.257397	0.926861	1.27711	0.347515	1.40456	2.11222	0.590355	-0.944031	0.145096
	20	1.41026	0.136405	-0.0627213	0.697403	-0.357071	1.61491	-0.758259	0.396866	0.0797195	1.37317	1.9621	-0.490242	-0.965935	-0.114914	-1.17934	2.56069	-0.48148	0.188683	0.805927	-0.72443	0.863552	-2.68055		20	1.41026	0.108719	-2.26376	1.33633	-1.32	-0.312916	-0.312595	0.215549	-0.179455	-0.0866928	-1.83839	-0.112789	1.65151	0.173561	0.742577	1.26683	0.425266	1.32183	1.93929	0.479465	-1.08683	0.135616
	20	1.44098	0.18588	0.168331	0.942989	-0.34864	1.72784	-0.710598	0.412445	0.158493	1.31346	2.16001	-0.634941	-0.960484	-0.0853157	-1.22508	2.31872	-0.137848	0.439705	0.620914	-0.409172	0.636471	-2.66969		20	1.44098	0.110214	-2.27854	1.09594	-1.30632	-0.285889	-0.314693	0.188377	-0.235508	-0.0709839	-1.72087	0.024086	1.75359	0.3484	0.542065	1.11127	0.408432	1.17606	2.15918	0.503902	-1.16395	0.269741
	20	1.4717	0.177642	0.121807	0.66872	-0.248062	1.49501	-0.651249	0.414616	0.185291	1.4206	2.23059	-0.438507	-0.743011	0.039463	-1.30789	2.15825	-0.551994	0.321388	0.930393	-0.442875	0.673031	-2.72274		20	1.4717	0.0886915	-2.26997	1.26052	-1.00448	-0.186111	-0.336105	0.268082	-0.222641	-0.0175667	-2.03075	0.103851	1.73618	0.423351	0.335819	0.907982	0.659821	0.927601	2.1058	0.311275	-1.40305	0.204231
	20	1.50242	0.193814	0.142727	1.0483	-0.478172	1.48067	-0.870461	0.46957	0.289551	1.41805	2.21232	-0.373791	-0.685516	0.15836	-1.38984	2.29332	-0.665585	0.264801	1.13332	-0.24931	0.716839	-3.03886		20	1.50242	0.115981	-2.4048	1.08423	-0.970173	-0.28743	-0.324017	0.1707	-0.0491333	-0.129898	-1.86771	-0.0128212	1.74738	0.545349	0.435398	1.15768	0.794289	0.977882	2.34322	0.41103	-1.2231	-0.0784378
	20	1.53314	0.250759	0.0848503	1.00863	-0.459908	1.43627	-0.751011	0.280003	0.59058	1.62902	2.53865	0.394051	-0.656082	-0.0740852	-1.56124	2.14352	-0.536766	0.163021	1.20961	-0.147316	0.681648	-2.95826		20	1.53314	0.0638306	-2.45757	1.24604	-1.30593	-0.293472	-0.517456	-0.0599365	-0.223728	0.0264359	-2.08537	0.119133	1.90605	0.475754	0.5858	1.33877	0.809132	1.21544	2.01894	0.294239	-1.34739	-0.468273
	20	1.56386	0.240183	0.0150642	1.04468	-0.856056	1.60271	-0.582714	0.557964	0.534943	1.73646	2.67352	-0.367329	-0.706699	0.183689	-1.48587	2.33722	-0.551731	0.0976067	1.28701	-0.338791	0.542389	-2.92041		20	1.56386	0.0539301	-2.44261	0.910065	-1.23675	-0.275604	-0.47665	0.016304	-0.127453	0.0825424	-2.15768	0.324413	2.00426	0.702	0.211056	1.38379	0.645149	1.05499	1.70819	0.454922	-1.36494	-0.337383
	20	1.59458	0.256449	-0.110809	1.22697	-0.835598	1.4553	-0.474995	0.583439	1.01992	1.92894	2.67442	-0.67112	-0.742115	-0.2159	-1.33634	2.21049	-0.484554	0.17841	1.42195	-0.363148	0.512672	-2.84895		20	1.59458	-0.0108229	-2.56531	0.922775	-1.3534	-0.45245	-0.562958	-0.317772	-0.419994	0.0461998	-2.36489	0.395901	1.95662	0.709404	0.175339	1.20984	0.779388	1.07505	1.63445	0.573109	-1.37093	-0.286816
	20	1.6253	0.244952	-0.545788	0.905006	-0.910973	1.75389	-0.385494	0.659939	0.734035	1.73032	2.72444	-0.536987	-0.439861	0.0534172	-1.46963	2.04404	-0.610836	0.0589981	1.48999	-0.265812	0.686432	-2.77608		20	1.6253	0.035651	-2.34613	0.77314	-1.38203	-0.361279	-0.254192	-0.246021	-0.573021	-0.0100098	-2.34629	0.703484	1.92876	0.812641	0.269005	1.14787	0.95031	1.00164	1.7545	0.374195	-1.23383	-0.249718
	20	1.65602	0.218687	-0.327496	1.05552	-1.15371	1.66832	-0.227303	0.543884	1.01772	1.70292	2.60319	-0.370079	-0.257446	0.0249062	-1.7542	1.95552	-0.793274	-0.105022	1.56736	-0.379463	0.580074	-2.97768		20	1.65602	0.0456087	-2.49431	0.628101	-1.35244	-0.323776	-0.111736	-0.251968	-0.529606	-0.114208	-2.30487	0.99984	2.05603	0.864426	0.366028	1.28482	0.831951	1.05998	1.56052	0.356632	-1.23942	-0.373814
	20	1.68674	0.248391	-0.238815	1.11451	-1.33845	1.40085	-0.458019	0.705196	1.42369	1.91105	2.62198	-0.369068	-0.198021	0.10947	-1.74142	1.92784	-0.699108	-0.270069	1.68284	-0.386322	0.424274	-2.65459		20	1.68674	0.0159767	-2.43475	0.368736	-1.10006	-0.370949	-0.198704	-0.276333	-0.343544	-0.179119	-2.22533	0.988838	2.33578	0.975861	0.00515747	1.15285	0.938595	1.10468	1.48302	0.206898	-1.51745	-0.594639
	20	1.71746	0.236809	-0.133389	1.18363	-1.36189	1.44447	-0.0879364	0.390835	1.25226	1.74662	2.60545	-0.464294	-0.472488	-0.0532722	-2.09669	1.69147	-0.630768	-0.235497	1.95192	-0.0592575	0.414383	-2.34939		20	1.71746	-0.0384718	-2.69785	0.352379	-1.24264	-0.251907	-0.473312	-0.453812	-0.782082	-0.308163	-2.46199	1.2646	1.94445	1.1134	0.0672569	1.1592	1.14874	1.44209	1.38792	0.194008	-1.65774	-0.513981
	20	1.74818	0.268233	-0.2402	1.26018	-1.40544	1.26707	-0.0601921	0.40807	1.39774	1.74203	2.95432	-0.443085	-0.424866	0.0733757	-2.05664	1.77769	-0.669247	-0.0799904	1.88193	0.0366325	0.439941	-2.49467		20	1.74818	-0.075173	-2.52015	0.120033	-1.55141	-0.279896	-0.452057	-0.528198	-0.762959	-0.0249214	-2.39622	1.38503	1.9091	0.883617	-0.0791969	1.07041	1.49543	1.25591	1.19953	0.143559	-1.80703	-0.564034
	20	1.7789	0.239374	-0.283211	1.02656	-1.28665	1.22406	0.0348396	0.611443	1.52171	2.11996	2.79214	-0.551399	-0.70578	0.0221367	-1.79756	1.46121	-0.622707	-0.441006	2.00755	-0.329529	0.318645	-2.33494		20	1.7789	-0.0371805	-2.76277	0.0368576	-1.47107	-0.0226898	-0.0683212	-0.30492	-0.895672	-0.168236	-1.86819	1.17836	2.33896	0.556946	-0.125568	1.0486	1.6026	1.4052	1.2506	0.284821	-2.15998	-0.599144
	20	1.80962	0.255826	-0.526192	1.25902	-1.5541	1.37536	0.340168	0.274677	1.45623	1.98953	3.07673	-0.511749	-0.626045	-0.0864372	-1.89938	1.53076	-0.471394	-0.509811	2.06375	-0.225437	0.312649	-2.15182		20	1.80962	-0.0674236	-2.65853	-0.163303	-1.42221	-0.134533	-0.276009	-0.29554	-0.787922	-0.15028	-2.18731	1.39085	2.52746	1.00789	-0.29134	0.924255	1.52444	1.28457	1.19138	0.211529	-2.03223	-1.01163
	20	1.84034	0.221655	-0.626747	1.05827	-1.29134	1.53632	0.20396	0.280113	1.53643	2.05331	3.08007	-0.730045	-0.580585	-0.0955544	-2.16173	1.28639	-0.335495	-0.529705	2.00349	-0.197304	0.0426788	-2.09945		20	1.84034	-0.156164	-3.44839	-0.126064	-1.48048	-0.125423	-0.179604	-0.391823	-0.926907	-0.201279	-2.18071	1.36147	2.40985	0.963535	-0.214626	0.407425	1.42026	1.28036	0.998199	0.17168	-2.01139	-0.849373
	20	1.87106	0.256625	-0.537254	1.27566	-1.56629	1.26819	0.311485	0.17783	1.69761	2.11743	2.91072	-0.618145	-0.58556	0.0700111	-2.1657	1.07584	-0.0970306	-0.212433	1.73275	0.0864067	0.0242119	-1.83324		20	1.87106	-0.131016	-3.04214	-0.308048	-1.22206	-0.259308	-0.234871	-0.311825	-1.15178	-0.187618	-1.99853	1.25629	2.72206	0.925041	-0.280384	0.418488	1.56915	1.23597	0.971577	0.146576	-1.85875	-1.01015
	20	1.90178	0.244935	-0.314346	1.05965	-1.46557	1.28029	0.303776	0.144127	1.86241	2.37981	2.79454	-0.680992	-0.613728	-0.122581	-1.9841	0.980358	0.0674438	-0.465752	1.89971	-0.145397	-0.0564575	-2.02449		20	1.90178	-0.0800884	-2.87515	-0.117195	-1.49387	0.0440903	-0.354225	-0.331383	-0.978584	-0.0772438	-1.84184	1.5091	2.87003	0.929714	-0.139572	0.412014	1.67355	1.12054	0.829231	0.0812492	-2.05605	-0.806164
	20	1.9325	0.228115	-0.561085	0.906353	-1.69069	1.04967	0.230247	0.0775757	2.03454	2.47588	2.79517	-0.426697	-0.447563	-0.121723	-2.38295	1.27124	-0.16021	-0.44669	2.00621	-0.0943794	0.163399	-2.11601		20	1.9325	-0.198538	-2.72543	-0.292576	-1.88593	0.0413895	-0.187767	-0.249058	-1.28078	-0.165466	-2.02784	1.64533	2.47127	0.70393	-0.197475	0.522484	1.40586	0.925011	0.943291	-0.593857	-1.91308	-1.11005
	20	1.96322	0.215251	-0.452057	1.18605	-1.65814	0.82682	0.334793	-0.20668	2.0028	2.60593	2.74035	-0.622723	-0.548271	0.131824	-2.53724	0.955357	-0.110825	-0.683201	2.30907	-0.157402	0.268009	-2.07945		20	1.96322	-0.176756	-2.86962	-0.451458	-1.79183	0.174484	-0.332359	0.081295	-1.19241	-0.0541267	-2.00678	1.57611	2.32014	0.711216	-0.269932	0.631981	1.20534	0.951874	1.04136	-0.402447	-1.82259	-1.03536
	20	1.99394	0.204513	-0.500324	1.17698	-1.77475	0.818295	0.0315514	0.049324	2.12722	2.87691	2.96315	-0.629242	-0.598824	0.11269	-2.95052	0.781853	-0.371845	-0.618793	2.11854	0.175098	0.381741	-2.0788		20	1.99394	-0.234688	-2.90096	-0.415161	-1.98189	0.122269	-0.0267334	0.173595	-1.26259	-0.0177841	-2.08739	1.59785	2.27206	0.401844	-0.218109	-0.0375214	1.6763	0.548706	1.04029	-0.275021	-2.05147	-1.25205
	20	2.02466	0.172994	-0.512959	1.39206	-1.67148	0.716301	0.0912819	-0.190754	2.10749	2.7597	2.87498	-0.591454	-0.628151	0.110115	-3.12896	0.626472	0.00489426	-0.611092	1.98667	-0.182079	0.253033	-1.9462		20	2.02466	-0.203285	-2.79036	-0.564243	-1.98858	0.16272	-0.224907	0.433235	-1.12331	-0.0181389	-1.90897	1.59581	2.2953	0.436939	-0.197689	-0.112282	1.36757	0.485989	1.06396	-0.315304	-1.79028	-0.873165
	20	2.05538	0.206138	-0.305843	1.26061	-1.68903	0.450024	0.0290794	-0.0724602	2.42233	2.79029	2.99917	-0.631592	-0.482944	0.0390091	-3.42238	0.972229	-0.216167	-0.0346184	1.94921	-0.197376	0.304653	-2.04142		20	2.05538	-0.218094	-2.55087	-0.354816	-1.80275	0.31657	-0.200134	0.598236	-1.21619	-0.0760612	-1.94165	1.47903	1.97732	0.367832	-0.381832	-0.193939	1.43663	0.645004	0.882351	-0.467606	-1.73542	-1.1436
	20	2.0861	0.190021	-0.199581	1.32439	-1.67658	0.623604	-0.0844307	-0.050621	2.06298	2.87691	3.10521	-0.616047	-0.401192	0.115479	-3.51869	0.966171	-0.413982	-0.126659	2.20068	-0.313725	0.142658	-2.21615		20	2.0861	-0.177876	-2.51822	-0.543465	-1.87027	0.216564	-0.129322	1.05548	-1.08169	-0.175232	-1.86707	1.34321	2.21042	0.646557	-0.381542	-0.180611	1.31677	0.783009	0.722851	-0.337952	-1.89061	-0.8764
	20	2.11682	0.140393	-0.392502	1.1772	-1.74884	0.405975	-0.048584	-0.10788	2.21868	2.93906	2.90548	-0.845428	-0.368671	-0.0630226	-3.63524	0.802952	-0.533905	-0.0571747	2.23436	-0.274216	0.304783	-2.10517		20	2.11682	-0.255057	-2.61843	-0.508381	-2.03915	-0.0109596	-0.247589	0.891571	-1.07072	-0.176769	-2.08262	1.29096	2.01699	0.504627	-0.194279	-0.326714	1.27279	0.461143	0.698936	-0.232582	-1.78576	-0.944206
	20	2.14754	0.138884	-0.133446	1.29969	-1.63034	0.178215	-0.0955429	-0.0219078	2.17862	2.7716	2.65835	-1.18268	-0.392902	0.159039	-3.50491	0.880936	-0.725475	0.0654678	2.33667	-0.276562	0.266991	-2.05412		20	2.14754	-0.198458	-2.26275	-0.527203	-2.0158	0.120663	-0.102596	1.05659	-0.944397	-0.242874	-1.87857	1.52686	2.03915	0.586212	-0.305386	-0.288124	1.2431	0.480339	0.576782	-0.0832253	-1.91679	-1.03116
	20	2.17826	0.154297	-0.127926	1.29741	-1.53872	0.296982	0.0336571	-0.083477	2.35772	2.37027	2.94222	-0.994347	-0.424637	0.19566	-3.74087	0.837688	-0.802906	0.0209084	2.26808	-0.356018	0.595119	-2.06087		20	2.17826	-0.186106	-1.93755	-0.487289	-1.95785	0.367889	0.0624046	1.0118	-1.06127	-0.310806	-2.34512	1.37254	1.86477	0.753284	-0.479572	-0.214622	1.6051	0.434727	0.542233	-0.0885658	-1.94801	-0.9062
	20	2.20898	0.0636517	-0.212292	1.10421	-1.34457	0.119896	-0.0913315	-0.39954	2.31225	2.2128	2.59134	-1.02172	-0.674953	0.128033	-3.79385	0.771965	-0.626141	0.150372	2.29024	-0.448692	0.278816	-2.0738		20	2.20898	-0.213603	-2.16441	-0.450779	-2.06935	0.448162	-0.0404282	1.04424	-1.08138	-0.140984	-2.44616	1.32255	1.95803	0.665688	-0.652641	-0.198029	1.39612	0.397217	0.463985	0.0129738	-1.62491	-1.11197
	20	2.2397	0.0486786	0.0943031	1.40466	-1.52006	0.0161972	0.0150986	-0.557941	2.44806	2.08627	2.79132	-1.29626	-0.646523	0.0716362	-3.91355	0.674976	-0.929657	0.0697289	2.16843	-0.0912628	0.0911827	-2.00303		20	2.2397	-0.234758	-2.15096	-0.423492	-2.10185	0.547859	-0.126606	1.02424	-1.24976	-0.4384	-2.1699	1.02515	1.86222	0.428368	-0.679153	-0.0483856	1.5584	0.392662	0.16906	0.0566902	-1.36449	-1.00679
	20	2.27042	0.0803738	0.0908699	1.31604	-1.58937	-0.0796127	0.0163155	-0.111706	2.32701	1.95254	2.75296	-1.28173	-0.498905	-0.0405159	-3.76624	0.470127	-0.768669	0.293316	2.2349	-0.17141	0.266315	-1.80476		20	2.27042	-0.210731	-1.96974	-0.166824	-2.21683	0.474056	-0.0312614	1.36908	-1.20559	-0.391647	-2.23417	0.947052	1.67106	0.403191	-0.700943	0.0485802	1.37513	0.45726	0.0409966	0.239376	-1.39324	-0.930141
	20	2.30114	0.0536106	0.390942	1.60632	-1.20702	-0.011879	-0.128452	-0.491886	2.40807	1.6521	2.62164	-1.21766	-0.693848	-0.17123	-3.96027	0.344498	-0.883904	0.346088	2.1269	-0.0589828	0.436008	-2.03522		20	2.30114	-0.230763	-2.03915	-0.121475	-2.38273	0.421333	0.128876	1.44585	-1.17731	-0.395058	-2.67703	0.956245	1.61776	0.112381	-0.773193	0.110653	1.46243	0.409946	0.437366	-0.196163	-1.03136	-0.924633
	20	2.33186	0.0438204	0.59626	1.57774	-1.34988	-0.17754	0.00845718	-0.505383	2.41889	1.48783	2.64079	-1.24564	-0.545753	-0.185677	-4.10521	0.281586	-0.966946	0.281548	2.12812	-0.0344887	0.276314	-1.70461		20	2.33186	-0.261809	-1.988	-0.072361	-2.3751	0.359962	0.0132408	1.20776	-1.00278	-0.230343	-2.55176	1.18716	1.28084	0.130428	-0.79887	-0.166985	1.39481	0.232643	0.306808	-0.308605	-0.891697	-0.963337
	20	2.36258	-0.0144499	0.835487	1.59149	-1.48879	-0.232273	0.0663452	-0.638443	2.5347	1.25495	2.31665	-1.51289	-0.677979	-0.0445709	-4.0962	0.0675011	-1.30382	0.44236	2.04902	0.0706444	0.153732	-1.6769		20	2.36258	-0.312772	-2.07285	-0.0184555	-2.54022	0.709152	0.178036	1.12012	-1.25417	-0.411636	-2.6234	0.919838	1.33591	-0.0852661	-0.777008	-0.381847	1.58514	0.103256	0.230873	-0.279968	-0.735065	-1.25787
	20	2.3933	-0.00860539	0.960373	1.58134	-1.40464	-0.381008	-0.173363	-0.507137	2.26076	1.18589	2.27906	-1.55139	-0.794846	0.0813751	-4.00389	-0.172729	-0.76236	0.169109	2.18952	0.217487	0.194679	-1.54034		20	2.3933	-0.26407	-1.64032	0.280975	-2.42859	0.657246	0.0849915	1.13124	-0.841854	-0.340302	-2.49035	0.476463	1.52007	0.0537872	-0.971916	-0.418015	1.48309	-0.037159	0.22863	-0.0867424	-0.688591	-1.25404
	20	2.42402	-0.061735	1.0587	1.72114	-1.38995	-0.0743294	-0.288574	-0.597721	2.43898	0.886467	2.05709	-1.63604	-1.10942	-0.118443	-4.16729	-0.362225	-1.31981	0.295368	1.92138	0.579395	0.367435	-1.49686		20	2.42402	-0.296673	-1.92529	0.488342	-2.55324	0.769478	-0.0711975	1.12488	-0.743252	-0.424366	-2.79673	0.293919	1.3521	-0.168526	-0.923542	-0.395714	1.37967	0.0335884	0.354874	-0.35104	-0.162148	-1.21525
	20	2.45474	-0.0455378	1.26284	1.66241	-1.3677	-0.361755	-0.185902	-0.793129	2.18013	0.907639	1.81216	-1.24161	-0.841621	-0.0208244	-3.91828	-0.488632	-1.13303	0.333252	1.95654	0.678432	0.108196	-1.45986		20	2.45474	-0.31157	-1.9197	0.893234	-2.62897	0.51561	0.0263901	1.19479	-0.794765	-0.663334	-2.79615	0.320671	1.01437	-0.393185	-1.06541	-0.595638	1.30013	0.0962906	0.524067	-0.0997353	0.110722	-1.27079
	20	2.48546	-0.127553	0.763916	1.80664	-1.58791	-0.503578	-0.0362473	-0.686405	2.30592	0.73613	1.45194	-1.44484	-1.0643	-0.333485	-4.12065	-0.178024	-1.35075	0.496769	2.00228	0.619034	-0.000617981	-1.42688		20	2.48546	-0.203386	-2.13063	0.84306	-2.32643	0.63076	0.0997391	1.23778	-0.410038	-0.634342	-2.64029	0.769062	1.01255	-0.256874	-0.911182	-0.717041	1.4105	0.0980339	0.468864	0.000854492	0.456272	-1.06836
	20	2.51618	-0.0930944	0.872189	1.54121	-1.72515	-0.585537	-0.119957	-0.728352	1.96511	0.814735	1.56664	-1.36188	-1.09587	-0.0972366	-4.00349	-0.264568	-1.28153	0.68642	1.86001	1.08775	-0.0244522	-0.967941		20	2.51618	-0.292649	-1.99176	1.03368	-2.53531	0.574276	-0.340595	1.03789	-0.471851	-0.529667	-2.78551	0.526352	0.91106	-0.563644	-0.999596	-0.689671	1.23789	0.109016	0.281857	-0.062748	0.578033	-1.17268
	20	2.5469	-0.0469204	1.34505	1.58482	-1.47946	-0.192291	0.219685	-0.863319	1.88855	0.772297	1.46557	-1.23553	-1.07061	-0.126263	-4.03359	-0.465782	-1.35205	0.636814	1.48882	1.35778	0.0027771	-0.881676		20	2.5469	-0.259897	-2.08887	1.12823	-2.44317	0.601006	-0.260918	1.12352	-0.237988	-0.766773	-3.00795	0.460369	1.05768	-0.662136	-0.840324	-0.152981	1.28278	-0.0552788	0.345123	-0.0984688	0.84026	-1.42205
	20	2.57762	-0.032448	1.27201	1.51272	-1.81165	-0.353947	0.250561	-0.833912	1.89227	0.610291	1.3367	-1.09329	-0.745907	-0.266548	-3.90067	-0.58757	-1.39464	0.927437	1.50883	1.36117	0.250183	-0.583008		20	2.57762	-0.329452	-2.06076	1.35816	-2.54755	0.664291	-0.449554	1.13868	-0.234585	-0.886471	-2.96193	0.683517	0.853664	-0.75927	-1.30458	-0.519714	1.33211	0.00827026	0.124207	-0.314262	0.882793	-1.59605
	20	2.60834	-0.0700607	1.49403	1.79767	-1.80402	-0.539795	0.261776	-0.757771	1.88689	0.543797	1.16467	-1.20431	-0.779095	-0.526138	-3.93348	-0.664516	-1.56232	0.884724	1.23226	1.46135	0.212696	-0.569656		20	2.60834	-0.300258	-1.92612	1.27696	-2.68932	0.665424	-0.408546	1.0343	-0.0696602	-0.874947	-2.9118	1.02121	0.465336	-0.605618	-0.954582	-0.804016	1.05204	0.373707	0.236534	-0.252991	1.04768	-1.68075
	20	2.63906	-0.0937675	1.27799	1.46489	-2.03696	-0.416698	0.441662	-0.758987	1.57483	0.284733	1.19676	-0.918793	-0.587563	-0.137897	-4.18071	-0.875492	-1.55064	1.00102	1.2257	1.45343	0.179005	-0.511635		20	2.63906	-0.224241	-1.60143	1.41482	-2.10917	0.625786	-0.281792	0.758198	0.0164795	-0.849968	-2.88997	1.0195	0.619705	-0.687416	-1.00274	-0.902222	1.19599	0.275009	0.197601	-0.116604	1.39886	-1.56546
	20	2.66978	-0.138029	1.16431	1.4938	-1.98264	-0.337257	0.588005	-0.73547	1.49276	0.00183868	1.19592	-0.988029	-0.782242	-0.300617	-4.2308	-1.0599	-1.65568	1.00787	0.997368	1.65184	0.387882	-0.66954		20	2.66978	-0.299295	-1.95128	1.4675	-2.57932	0.473354	-0.43961	0.671127	0.0472984	-0.806957	-2.81749	0.932426	0.501194	-0.51527	-1.12734	-0.860855	1.07661	0.0349007	0.360893	0.0342445	1.33751	-1.82485
	20	2.7005	-0.148502	1.2183	1.6563	-1.95582	-0.525146	0.534206	-0.572796	1.28994	0.165211	0.803989	-0.941608	-0.788536	-0.502155	-3.90401	-1.23132	-1.75377	0.909828	0.983372	1.68201	0.527954	-0.565994		20	2.7005	-0.336144	-1.94537	1.5672	-2.77066	0.0761032	-0.412575	0.625175	-0.0418625	-0.920326	-2.64137	1.06209	0.342876	-0.562607	-1.11014	-0.661049	1.07913	0.184387	0.141426	-0.203484	1.51897	-2.0508
	20	2.73122	-0.153608	1.10412	1.82162	-2.00636	-0.842155	0.779324	-0.907284	1.05815	-0.0904694	0.914463	-0.908421	-0.583221	-0.251194	-3.96457	-1.10493	-1.66221	1.26455	0.659431	1.55287	0.590504	-0.496376		20	2.73122	-0.338361	-2.03489	1.46794	-2.81564	-0.093811	-0.342144	0.667042	0.282352	-1.07717	-2.76133	1.08402	0.507481	-0.62368	-1.15576	-0.449047	1.00745	-0.0940132	0.153564	-0.311737	1.5569	-1.73473
	20	2.76194	-0.201662	0.788219	1.67666	-2.32908	-0.774467	0.808937	-0.367924	1.43987	-0.180328	1.18079	-1.14599	-0.520767	-0.343884	-3.90627	-1.35647	-1.98029	0.851955	0.291267	1.4871	0.917843	-0.570427		20	2.76194	-0.363634	-1.96995	1.608	-2.75712	-0.29966	-0.529591	0.296276	0.23579	-1.42875	-2.6279	1.13206	0.789841	-0.779297	-1.04888	-0.49958	0.844952	-0.00505829	0.156662	-0.449589	1.74643	-1.68733
	20	2.79266	-0.143328	0.98563	1.81859	-1.97577	-0.986176	1.08505	-0.50399	1.12984	0.02425	1.02343	-0.983887	-0.343311	-0.144501	-3.77721	-1.45769	-1.87823	0.714363	0.119152	1.61902	1.00466	-0.339783		20	2.79266	-0.361124	-2.15172	1.4269	-2.88235	-0.31245	-0.785309	0.368862	0.427574	-1.42692	-2.35986	1.38723	0.81691	-0.639297	-0.94767	-0.710152	0.599968	-0.170746	0.220558	-0.357456	1.93544	-1.66201
	20	2.82338	-0.200928	0.881943	1.78702	-2.14679	-1.04812	1.20955	-0.258274	0.967766	-0.335716	0.690907	-1.31108	-0.0246315	-0.234543	-3.75785	-1.51383	-2.11886	0.920979	-0.158653	1.68133	0.955463	-0.205185		20	2.82338	-0.307634	-2.27717	1.61607	-2.82207	-0.255173	-0.750675	0.223045	0.562138	-1.64891	-2.27763	1.35891	0.84161	-0.862251	-0.59306	-0.460598	0.591862	-0.197903	0.752804	-0.109581	1.91296	-1.75705
	20	2.8541	-0.153233	0.652241	1.63916	-1.97462	-0.994019	1.16018	-0.241512	1.16012	-0.460781	0.453957	-1.36015	-0.140514	0.0915642	-3.49994	-1.528	-1.95948	0.960205	0.0895958	1.77785	1.03119	0.0782928		20	2.8541	-0.301605	-2.01654	1.66275	-2.876	-0.507355	-0.576382	0.132042	0.516228	-1.45475	-2.24387	1.28746	1.01467	-0.867889	-0.333946	-0.282043	0.703522	-0.338036	0.640644	-0.542133	2.02661	-1.97707
	20	2.88482	-0.169088	0.775574	1.59874	-2.4136	-1.01605	1.39051	0.0395088	0.974373	-0.582954	0.53738	-1.50177	0.156921	-0.299679	-3.42269	-1.46946	-2.10529	0.889744	-0.092205	1.79576	1.08002	0.283405		20	2.88482	-0.343598	-2.25021	1.5095	-2.61004	-0.52388	-0.741257	0.161533	0.0186005	-1.43902	-2.14335	1.29351	0.987251	-0.787903	-0.33503	-0.664898	0.650654	-0.386337	0.748528	-0.644951	2.06824	-1.78292
	20	2.91554	-0.172074	0.72007	1.61488	-2.39954	-1.03508	1.5143	-0.211842	0.810257	-0.611221	0.773304	-1.41063	0.465691	-0.188133	-3.20282	-1.42183	-2.18456	0.908543	-0.453327	1.60468	0.951969	0.31382		20	2.91554	-0.327879	-1.91412	1.49004	-2.70354	-1.12862	-1.04984	0.301224	0.293247	-1.24677	-2.17663	1.37281	1.10645	-0.766418	-0.165249	-0.550827	0.7117	-0.345505	0.892319	-0.72501	2.07901	-2.03185
	20	2.94626	-0.193221	0.55526	1.50499	-2.33445	-1.02516	1.51468	0.0891724	0.788525	-0.718987	0.698868	-1.72436	0.486347	-0.281918	-3.11433	-1.6286	-2.12342	0.934483	-0.364162	1.42365	0.986324	0.468681		20	2.94626	-0.30636	-2.08616	1.63139	-2.41811	-1.17659	-1.04244	0.0441589	0.177151	-1.37029	-1.89534	1.36407	1.12287	-0.636791	-0.135471	-0.448532	0.753201	-0.164585	0.972649	-0.696449	2.00807	-2.12999
	20	2.97698	-0.16081	0.351128	0.968761	-2.30151	-0.903667	1.86802	0.0161934	0.778297	-0.737751	0.653309	-1.88953	0.512764	0.0294113	-2.80855	-1.39729	-2.08208	0.679371	-0.144337	1.44743	1.14525	0.598572		20	2.97698	-0.364727	-2.30496	1.46469	-2.4465	-1.25865	-1.04373	0.139946	0.0680237	-1.2835	-1.83282	1.57349	0.97168	-0.671124	-0.00795746	-0.561676	0.745388	-0.281517	0.820133	-0.848988	1.92445	-2.46093
	20	3.0077	-0.16081	0.401974	1.26546	-2.43979	-0.470383	1.97317	0.104519	0.497345	-0.930058	0.339588	-2.08457	0.695869	-0.0278816	-2.69001	-1.31789	-2.21534	0.625774	-0.172974	1.5283	1.00231	0.698399		20	3.0077	-0.390128	-2.34901	1.29559	-2.38859	-1.34392	-1.12342	0.0226669	0.278118	-1.46718	-1.73547	1.58934	1.12585	-0.538361	-0.0615616	-0.599072	0.329586	-0.0611687	0.633976	-1.01071	1.86575	-2.26497
	20	3.03842	-0.140364	0.279663	1.38178	-2.48816	-0.450378	2.04216	0.0551186	0.543381	-1.08294	0.306351	-2.02016	0.685829	0.0340996	-2.69791	-1.19952	-2.21107	0.418518	-0.0618095	1.52221	1.1671	0.968468		20	3.03842	-0.401725	-2.17745	1.24172	-2.15335	-1.3935	-1.15379	-0.0438499	0.192947	-1.44125	-1.76617	1.53504	1.22562	-0.687195	0.0727501	-0.59547	0.440666	-0.0635757	0.617207	-1.13097	1.51924	-2.27313
	20	3.06914	-0.161313	0.265549	1.37419	-2.53333	-0.0621376	2.04855	-0.0989037	0.658085	-1.31913	0.342831	-2.22335	0.655327	-0.0566216	-2.57042	-1.30107	-2.17904	0.49535	-0.300648	1.36885	1.13492	1.07474		20	3.06914	-0.320477	-2.21126	1.19827	-2.00893	-1.3646	-0.886909	-0.0717354	0.500362	-1.62263	-1.61292	1.65703	1.08627	-0.361904	0.0735245	-0.337429	0.607811	0.154251	0.683617	-1.0078	1.39891	-2.28345
	20	3.09986	-0.0615189	0.223228	1.15416	-2.79136	0.0264282	2.21392	-0.122864	0.515312	-1.27709	0.41264	-2.12233	0.966618	0.129177	-2.38237	-0.441261	-2.08489	0.524582	-0.198818	1.51277	1.12741	1.38435		20	3.09986	-0.313541	-1.96923	1.59007	-1.61053	-1.58712	-0.836304	0.0824623	0.123219	-1.48923	-1.35623	1.41623	0.831657	-0.140953	0.295383	-0.592216	0.438465	0.0230408	0.619053	-0.94952	1.31965	-2.4787
	20	3.13058	-0.114883	0.304981	1.05738	-2.72455	0.229424	2.1642	-0.375134	0.565807	-1.30771	0.3573	-2.18862	1.0857	0.106228	-2.23495	-0.981365	-1.95892	0.342098	-0.558411	1.49768	0.730167	1.59105		20	3.13058	-0.303701	-1.99541	1.40078	-1.62435	-1.49824	-0.62714	0.358562	0.128704	-1.50539	-1.46936	1.40929	0.642746	-0.292645	0.396591	-0.5802	0.557384	-0.0546341	0.698875	-1.12748	1.34711	-2.23921
	20	3.1613	-0.12069	0.229675	0.848537	-2.67277	0.464592	2.02433	-0.296169	0.34988	-1.05331	0.226326	-2.08786	1.06466	0.125244	-2.01231	-1.19852	-2.04558	0.279236	-0.197433	1.48027	0.598194	1.45921		20	3.1613	-0.336283	-2.0089	1.14127	-1.45526	-1.89149	-0.205032	0.311462	0.0377235	-1.4673	-1.46588	1.40871	0.815384	-0.139175	0.346355	-0.74979	0.0837212	-0.101833	0.703049	-1.22707	1.21471	-2.07631
	20	3.19202	-0.0812384	0.397678	0.826115	-2.64338	0.902256	2.26337	0.035862	0.0682831	-1.1414	0.313774	-2.12667	1.10962	0.0903015	-1.65695	-1.4228	-2.29993	0.10041	-0.291691	1.48487	0.753738	1.61178		20	3.19202	-0.301915	-2.18024	0.905766	-1.14188	-1.49269	-0.0428467	0.262623	-0.383183	-1.2996	-1.69986	1.44165	0.715263	0.38147	0.314949	-0.502892	0.040493	0.115452	0.628483	-1.22435	0.999668	-1.87658
	20	3.22274	-0.0884638	0.375492	0.860352	-2.63259	0.888702	2.10017	-0.135071	-0.121235	-1.02834	0.204914	-1.95677	1.12678	0.0855484	-1.67538	-1.61861	-2.14244	-0.000572205	-0.068306	1.5539	0.673923	1.74025		20	3.22274	-0.28686	-2.2871	1.13635	-0.884678	-1.7836	-0.0316429	0.124504	-0.394493	-1.26693	-1.52024	1.56453	0.588219	0.403107	0.333912	-0.256977	0.546131	0.0416145	0.630997	-1.34923	0.56673	-1.8984
	20	3.25346	-0.093726	0.409363	0.922756	-2.60922	1.34772	2.32765	0.0152397	-0.228104	-1.0777	0.225014	-2.2091	1.11212	0.0432396	-1.5766	-1.56628	-2.33503	-0.0920792	-0.162792	1.51419	0.516045	1.54905		20	3.25346	-0.289982	-2.26943	1.00431	-0.855579	-1.78039	0.0580025	0.276569	-0.289875	-1.59858	-1.48444	1.40097	0.422447	0.550747	0.554115	-0.632488	0.622261	0.18185	0.592731	-1.42342	0.731087	-1.86052
	20	3.28418	-0.0644478	0.350449	0.828388	-1.73344	1.47113	2.4835	-0.274105	-0.203941	-0.647438	0.113281	-2.1571	0.90202	0.0593796	-1.42945	-1.49838	-2.48093	-0.352489	0.0570908	1.38011	0.373589	1.46937		20	3.28418	-0.269914	-2.11889	1.14028	-0.614285	-1.78563	0.015007	0.477772	-0.591179	-1.51733	-1.58441	1.34132	0.124008	0.64949	0.743706	-0.879082	0.750824	0.426811	0.395535	-1.33713	0.725994	-1.76111
	20	3.3149	-0.0949343	0.245914	1.08498	-2.39081	1.83969	2.49347	-0.30386	-0.427803	-0.664223	0.251514	-2.53923	0.867901	0.165871	-1.23316	-1.34396	-2.515	-0.456009	0.228764	1.30645	0.212036	1.27878		20	3.3149	-0.218357	-2.1593	0.992939	-0.249054	-1.55899	0.424427	0.402695	-0.769634	-1.26843	-1.57988	1.32156	0.146595	0.897717	0.59951	-0.702202	0.621601	0.184055	0.533379	-1.2527	0.652241	-1.60366
	20	3.34562	-0.105251	0.264858	0.710182	-2.53928	1.57048	2.53456	-0.356907	-0.280533	-0.430332	0.400124	-2.32383	0.666962	0.144115	-1.57313	-1.05612	-2.54349	-0.357258	0.292435	1.45862	0.132359	1.18115		20	3.34562	-0.293638	-2.31497	0.928566	-0.0637054	-1.54178	0.350246	0.263115	-0.725098	-1.44588	-1.68729	1.29967	0.124557	0.683014	0.554676	-0.766193	0.75296	-0.0282326	0.591301	-1.38459	0.472507	-1.93565
	20	3.37634	-0.0689735	0.408943	0.929382	-2.41415	1.57929	2.43013	-0.631313	-0.44368	-0.398159	0.260979	-2.45323	0.864002	0.135712	-1.32849	-0.707264	-2.42239	-0.178696	0.546051	1.23452	0.034008	1.17488		20	3.37634	-0.185011	-2.30465	0.793015	0.143574	-1.35202	0.44416	0.193981	-0.602123	-1.31454	-1.67374	1.34695	0.155598	1.06427	0.763248	-0.708885	0.695812	0.448643	0.482525	-1.17607	0.755146	-1.85512
	20	3.40706	-0.0273849	0.664814	0.874443	-2.35133	1.57644	2.61169	-0.320179	-0.468716	-0.287022	0.566689	-2.47903	0.72113	-0.000804901	-1.35141	-0.637493	-2.34357	-0.300434	0.475849	0.928524	0.174763	1.39793		20	3.40706	-0.163899	-2.51406	1.18935	0.129459	-1.49728	0.184116	0.263077	-0.813789	-1.22096	-1.54554	1.27309	0.172646	0.878468	0.618633	-0.41127	0.873672	0.519272	0.601814	-1.17688	0.816357	-1.61815
	20	3.43778	-0.0388971	0.413536	0.903969	-2.0693	1.58841	2.47641	-0.489788	-0.77021	-0.231922	0.577816	-2.40333	0.793182	-0.110065	-1.23938	-0.420319	-2.34708	-0.26865	0.626911	0.874245	0.0794029	1.23822		20	3.43778	-0.128628	-2.1971	1.06084	0.218891	-1.50443	0.494263	0.435085	-1.15751	-1.1873	-1.33509	1.01278	0.320774	1.06563	0.638706	-0.267956	0.849602	0.772079	0.665104	-1.24402	0.566875	-1.77979
	20	3.4685	-0.080237	0.441906	0.807327	-2.06044	1.71394	2.82022	-0.646801	-0.624855	-0.246525	0.600559	-2.60316	0.627934	-0.207088	-1.37073	-0.507484	-2.28101	-0.350941	0.811306	0.589302	-0.169147	1.05094		20	3.4685	-0.110811	-2.16059	0.984562	0.369461	-1.20479	0.403305	0.190254	-1.25882	-1.24646	-1.38472	0.996857	0.45232	1.17081	0.609833	-0.236786	1.00837	0.860676	0.712059	-1.09675	0.504353	-1.89016
	20	3.49922	-0.0740046	0.642845	1.15053	-2.02196	1.8886	2.65323	-1.02182	-0.857254	-0.384892	0.813828	-2.58094	0.503143	-0.142799	-1.7671	-0.265594	-1.98611	-0.148571	0.78981	0.680054	-0.479961	1.05486		20	3.49922	-0.107822	-1.9653	1.05943	0.504311	-1.16693	0.0125847	-0.0590515	-1.18396	-1.24569	-1.16864	1.15121	0.0896988	1.21515	0.509331	-0.0877724	0.957249	0.777359	0.926125	-1.11923	0.536095	-1.89841
	20	3.52994	-0.0412994	0.631603	1.28944	-1.76291	2.05135	2.6131	-0.977966	-1.02711	-0.122368	0.819309	-2.76469	0.280964	-0.123676	-1.72918	-0.0695572	-2.01762	-0.01577	1.00012	0.399555	-0.610733	1.31016		20	3.52994	-0.0649328	-2.02322	1.18174	0.133713	-0.918724	0.162857	-0.0303078	-1.27508	-1.12445	-1.10297	1.31159	0.160416	1.32541	0.606972	0.101334	1.01394	0.713699	0.711655	-1.02879	0.744011	-1.96245
	20	3.56066	-0.0280247	0.832233	1.28148	-1.60727	1.95007	2.28093	-0.914116	-1.09076	-0.00996399	1.00504	-2.61245	0.375912	-0.107571	-1.38211	0.189571	-2.25223	0.107231	0.799511	0.343143	-0.977207	1.22807		20	3.56066	-0.0272966	-1.829	1.15408	0.47036	-1.01334	0.515877	0.199512	-1.10789	-1.09682	-0.990986	1.50262	0.215919	1.30226	0.363071	-0.177357	1.03342	0.517342	0.832928	-1.03345	0.764347	-2.1688
	20	3.59138	-0.0620766	0.797588	1.23035	-1.48914	2.2004	2.32374	-1.14724	-1.18684	0.218498	0.778374	-2.56972	0.129959	-0.187916	-1.58516	0.351837	-2.13478	-0.187016	0.881256	0.206959	-1.00259	1.12991		20	3.59138	0.111682	-1.49159	1.2576	0.396751	-0.533653	0.885712	0.104015	-1.19233	-1.02001	-0.883244	1.58873	0.185005	1.58989	0.509022	-0.0377502	1.28445	0.661312	1.14547	-1.02287	1.13321	-2.32608
	20	3.6221	-0.00445404	0.506279	1.48941	-1.41482	2.02996	2.07716	-0.915737	-1.26122	0.0987167	1.09324	-2.44778	0.138588	-0.0230751	-1.41534	0.379791	-2.0687	0.0620499	0.724171	0.49509	-0.70771	1.07085		20	3.6221	0.106598	-0.864853	1.26657	0.414928	-0.516167	0.636383	0.104946	-1.41413	-0.935562	-0.883289	1.4546	-0.29026	1.84593	0.569984	-0.0294571	1.15079	0.78207	1.04792	-0.935932	1.27931	-2.55184
	20	3.65282	-0.0430645	0.634525	1.20959	-1.09084	1.99522	2.15126	-1.18126	-1.24524	-0.0544662	0.849968	-2.31034	-0.0876007	0.0389938	-1.51154	0.493587	-2.00936	0.176373	0.842945	0.450863	-0.993752	0.779793		20	3.65282	0.141328	-0.852081	1.1428	0.256165	-0.102951	0.525826	0.16494	-1.23754	-0.928719	-0.965416	1.50726	-0.397976	1.96853	0.373718	-0.10149	1.22419	0.935253	1.17178	-0.730446	1.21238	-2.33967
	20	3.68354	0.0163309	0.591801	1.45814	-1.10752	2.01929	2.10521	-1.29034	-1.06179	0.107132	0.733582	-2.24095	0.0828362	0.181919	-1.6639	0.789989	-1.84075	0.346397	0.849094	0.39183	-0.948849	0.823509		20	3.68354	0.0852859	-0.800228	1.1995	0.167393	-0.152435	0.239883	0.151367	-1.20079	-0.967571	-0.912941	1.30323	-0.276012	1.9841	0.268299	-0.330826	1.02162	0.778614	1.09309	-0.760288	1.24413	-2.3444
	20	3.71426	-0.0704983	0.879475	1.51949	-0.960938	1.98058	1.91389	-1.41676	-1.19765	0.189331	0.593369	-2.26741	-0.275639	-0.101315	-1.80713	0.60659	-1.57159	0.202812	0.823845	-0.131355	-0.971642	0.582096		20	3.71426	0.223923	-0.65197	1.21933	0.236137	0.060936	0.440857	0.310593	-1.08581	-0.860878	-0.615189	1.56851	-0.17733	2.14689	0.324089	-0.281845	1.14854	1.00585	1.20848	-0.816135	1.44231	-2.14493
	20	3.74498	0.00227756	0.625202	1.62093	-0.811646	2.09053	2.15457	-1.40086	-1.2543	0.181877	0.618393	-2.10404	-0.238838	0.072628	-1.82792	1.04073	-1.88054	0.593853	0.576305	0.296906	-1.01159	0.703358		20	3.74498	0.202109	-0.516308	1.23494	0.00785446	0.211929	0.475021	0.0718155	-1.24632	-0.798008	-0.402798	1.65436	-0.306232	2.11623	0.400597	-0.191303	0.929615	0.953972	1.16822	-0.87418	1.40725	-2.25447
	20	3.7757	-0.0373812	0.581989	1.58667	-0.511539	2.05518	1.93609	-1.42055	-1.27094	-0.0717506	0.372784	-1.86444	-0.580467	-0.151775	-1.94601	1.22512	-1.63179	0.608101	0.574612	0.244846	-1.05088	0.567123		20	3.7757	0.198788	-0.390839	1.27935	-0.176804	0.248287	0.257629	0.12038	-1.31357	-0.720364	-0.416649	1.24462	-0.480598	2.31928	0.239895	-0.552341	0.982494	0.883327	1.51492	-0.567432	1.69281	-2.18863
	20	3.80642	-0.0762928	0.546822	1.48041	-0.626339	1.93966	1.61239	-1.34891	-1.4144	-0.31216	0.557098	-2.00066	-0.531784	-0.182995	-2.11213	1.2605	-1.72433	1.09389	0.511147	0.258316	-1.0727	0.540325		20	3.80642	0.199365	-0.315273	1.17378	-0.22179	0.0959473	0.562256	-0.107712	-1.02401	-0.712185	-0.364277	1.14796	-0.390358	2.32069	0.310497	-0.393196	0.872681	0.565445	1.43119	-0.57439	1.75086	-2.14083
	20	3.83714	-0.0961464	0.598118	1.4558	-0.326134	1.95675	1.37819	-1.39618	-1.38655	-0.418278	0.41724	-2.11687	-0.769104	-0.0838737	-2.02452	1.29425	-1.57872	1.02346	0.883045	0.14304	-1.41082	0.438236		20	3.83714	0.22083	-0.198601	0.928677	-0.101448	0.40284	0.231739	0.0100098	-0.969128	-0.51038	-0.283146	1.15432	-0.486366	2.32323	0.223953	-0.4356	0.75042	0.676571	1.53777	-0.268631	1.87641	-2.44604
	20	3.86786	-0.086528	0.468967	1.55928	-0.253342	1.59582	1.09431	-1.5646	-1.1266	-0.396725	0.538261	-2.04874	-0.790012	0.102699	-2.04841	1.25808	-1.44364	1.03089	0.906483	0.209549	-1.41853	0.595711		20	3.86786	0.167347	-0.270309	0.997135	-0.0435143	0.302288	-0.0517044	0.0322609	-0.948498	-0.403877	-0.353706	1.13039	-0.650009	2.24825	-0.115757	-0.500904	0.561687	0.971672	1.51338	-0.200443	1.66412	-2.53554
	20	3.89858	-0.147998	0.747749	1.83994	-0.339069	1.49181	1.14558	-1.80758	-1.38137	-0.689091	0.361832	-1.96104	-0.903404	0.0103989	-2.00989	1.37718	-1.59885	0.833214	0.635098	0.294411	-1.45136	0.444473		20	3.89858	0.197584	-0.0439758	1.03177	-0.041153	0.268028	-0.162487	0.0484505	-1.09174	-0.0699005	-0.375282	1.23322	-0.55172	2.12647	-0.0816536	-0.553333	0.605549	0.930893	1.49254	0.227459	1.45801	-2.49946
	20	3.9293	-0.188657	0.756428	1.78326	-0.639881	1.4718	1.02409	-1.87336	-1.26748	-0.890816	0.496155	-1.81547	-1.05904	-0.279057	-1.97432	1.40236	-1.40417	0.853062	0.632896	0.458599	-1.51945	0.0712738		20	3.9293	0.117473	0.00379944	0.924099	-0.122669	0.278671	0.0284615	-0.185295	-0.935787	-0.30666	-0.329197	0.834793	-0.648064	2.10841	-0.110523	-0.710865	0.57349	0.989449	1.39088	0.178379	1.24443	-2.85633
	20	3.96002	-0.138027	0.621685	2.02648	-0.572765	1.39009	0.746338	-1.98626	-1.14205	-0.752136	0.512394	-1.4579	-1.06895	0.067318	-2.01017	1.73057	-1.36272	0.802006	0.485935	0.186432	-1.55174	0.574898		20	3.96002	0.204296	0.115826	0.989307	-0.369755	0.0091629	0.0597801	-0.315956	-0.739212	-0.0677872	0.145176	0.937824	-0.352638	2.13688	-0.124363	-0.681992	0.830219	0.935524	1.65221	0.380474	1.37859	-2.83334
	20	3.99074	-0.187208	0.538784	1.8672	-0.648567	1.21207	0.519341	-2.04541	-0.852894	-0.803825	0.441093	-1.56863	-1.02687	-0.33321	-1.88758	1.50285	-1.63514	0.75209	0.577141	0.209431	-1.35868	0.79665		20	3.99074	0.158328	0.131783	1.12113	-0.298084	0.00508499	0.0191536	-0.456234	-0.707027	-0.130825	0.265205	1.07952	-0.774689	1.93317	-0.280098	-0.549526	0.623405	0.745235	1.56483	0.444122	1.30766	-2.87725
	20	4.02146	-0.157388	0.750858	2.10297	-0.531364	1.12454	0.264923	-2.00344	-1.06039	-0.729694	0.513729	-1.54138	-0.839596	-0.490902	-1.81089	1.27471	-1.53764	1.05376	0.406994	0.271168	-1.30032	0.934185		20	4.02146	0.110793	0.0389099	1.01405	-0.504749	0.0648575	-0.179234	-0.28196	-0.693043	-0.116638	0.00727463	1.16468	-0.710617	1.87712	-0.364162	-0.901566	0.749481	0.804398	1.58564	0.540264	0.974991	-2.85383
	20	4.05218	-0.246306	0.496159	2.1861	-0.495266	1.04559	-0.368557	-2.08818	-0.94471	-0.657032	0.678116	-1.51729	-1.25648	-0.355827	-1.95591	1.28978	-1.88364	0.970974	0.186848	0.202976	-1.46468	1.00491		20	4.05218	0.125548	0.142681	1.19286	-0.593876	-0.102272	-0.172573	-0.358459	-0.481983	-0.0988464	-0.14056	0.963421	-0.844822	1.75674	-0.214237	-0.594444	0.717651	1.0034	1.5927	0.463745	1.10637	-2.82653
	20	4.0829	-0.238977	0.837658	1.9994	-0.729836	0.924297	-0.129429	-2.22957	-0.97266	-0.83189	0.581223	-1.53696	-1.15415	-0.271648	-1.98678	1.28088	-1.92451	1.06234	0.319218	0.457005	-1.484	1.00988		20	4.0829	0.10573	0.0765076	1.25491	-0.717251	-0.208942	-0.35421	-0.356873	-0.485832	-0.0971375	-0.109123	0.794456	-0.751457	1.86012	-0.14167	-0.728912	0.534866	0.979393	1.76467	0.333115	1.1396	-2.67163
	20	4.11362	-0.234571	0.625641	2.12756	-0.800774	0.77282	0.157627	-2.19259	-0.760612	-0.798832	0.416702	-1.30596	-1.18662	-0.382694	-2.15818	1.17458	-2.02549	1.12218	0.306358	0.647263	-1.44815	1.01776		20	4.11362	0.149991	0.164879	1.34859	-0.576344	-0.287857	-0.373569	-0.256557	-0.484138	-0.149231	-0.218224	0.75391	-0.6548	1.73106	-0.443962	-0.461445	0.505341	0.892673	1.83259	1.11139	1.29452	-2.72901
	20	4.14434	-0.261181	0.550541	2.35359	-0.860069	0.83606	0.209026	-2.38395	-0.902184	-0.917194	0.458057	-1.47134	-1.33374	-0.266571	-1.97473	1.0881	-1.91416	0.979889	0.234524	0.406292	-1.23801	0.922241		20	4.14434	0.0772562	0.232555	1.12359	-1.0736	-0.42688	-0.374619	-0.274879	-0.525875	0.141426	-0.2864	0.975391	-0.842422	1.58297	-0.672867	-0.305767	0.705929	0.767551	1.58193	0.623447	1.41483	-2.82119
	20	4.17506	-0.261771	0.412819	2.57872	-0.800266	0.772774	0.396164	-2.30058	-0.954231	-0.904621	0.618584	-1.46619	-1.39397	-0.187122	-1.99697	1.22797	-1.94171	1.06983	0.00712967	0.364056	-1.48176	0.743958		20	4.17506	0.088966	0.223408	0.924026	-1.14815	-0.342506	-0.0107574	-0.518745	-0.34874	0.247353	-0.171532	0.694374	-0.900349	1.60748	-0.555565	-0.0847054	1.07507	0.922501	1.34708	0.237484	1.50116	-2.91956
	20	4.20578	-0.263253	0.609135	2.37433	-0.759315	1.03384	0.250988	-2.60436	-1.02425	-0.958179	0.505169	-1.42448	-1.23853	-0.391087	-1.94933	1.1092	-1.91869	1.17185	0.116909	0.400761	-1.32672	0.75769		20	4.20578	-0.0547239	0.0611191	0.717674	-1.04992	-0.684349	-0.10754	-0.518162	-0.580196	0.124004	-0.579559	0.634628	-1.06561	1.41122	-0.813908	-0.165314	1.04853	0.66391	1.23745	0.298435	1.38313	-3.11002
	20	4.2365	-0.306142	0.566944	2.48859	-0.887299	1.25935	0.167839	-2.65417	-0.853798	-0.879276	0.342384	-1.36247	-1.22708	-0.370678	-2.09062	1.08631	-2.00784	1.20285	-0.191902	0.0650673	-1.55742	0.780388		20	4.2365	-0.0224037	0.140526	0.897537	-1.12185	-0.819435	-0.0787888	-0.41328	-0.462124	0.138325	-0.281013	0.599915	-0.70097	1.39271	-1.0149	-0.0160675	0.977226	0.612053	1.3767	0.142864	1.26947	-3.08697
	20	4.26722	-0.336791	0.215801	2.51143	-0.94862	1.2063	-0.0495605	-2.57895	-0.951584	-0.876369	0.396244	-1.3059	-1.25962	-0.29108	-2.08992	0.954468	-1.82177	1.04754	-0.263618	0.138508	-1.55844	0.789322		20	4.26722	-0.0264351	0.111137	1.02056	-1.55523	-0.652267	0.170383	-0.664215	-0.406284	0.326138	-0.268448	0.521515	-0.801701	1.29843	-0.788166	-0.0374908	0.982662	0.631947	1.09831	0.223537	1.08943	-2.82895
	20	4.29794	-0.380393	0.2127	2.55146	-0.82933	1.35849	-0.0119057	-2.68738	-1.01221	-1.13618	0.372513	-1.394	-1.58149	-0.287376	-2.358	0.945724	-1.93132	1.12503	-0.0985489	0.057354	-1.41592	0.512543		20	4.29794	0.097727	0.238087	0.787231	-1.28254	-0.891083	0.296921	-0.484947	0.0448494	0.653175	-0.255344	0.563713	-0.78672	1.5211	-0.43235	0.286057	1.01838	0.729176	1.0677	-0.0122833	1.70969	-2.81627
	20	4.32866	-0.349783	0.200127	2.56284	-1.02755	1.14401	-0.273815	-2.38738	-0.955017	-0.887241	0.432411	-1.38745	-1.38947	-0.36541	-2.23272	0.783497	-1.8072	1.05498	0.251652	0.00403214	-1.5471	0.83115		20	4.32866	0.0161297	0.222229	0.926994	-1.4404	-1.00155	0.157246	-0.660664	-0.468044	0.639297	-0.36702	0.621983	-0.780243	1.0088	-0.619667	0.150124	1.14016	0.731476	1.03976	-0.0228119	1.70246	-2.65754
	20	4.35938	-0.3576	0.175785	3.00584	-1.05128	1.51964	-0.242695	-2.38494	-0.951107	-0.669586	0.240032	-1.42783	-1.48352	-0.36034	-2.47765	0.761917	-1.98206	1.1394	-0.0601311	0.0936623	-1.56124	0.564087		20	4.35938	0.0859514	0.104939	0.832787	-1.58515	-0.865654	0.520367	-0.427219	-0.441795	0.989143	-0.372265	0.91774	-0.841507	0.988815	-0.278942	-0.0781403	1.10931	0.833267	0.940464	0.124603	1.71118	-2.46291
	20	4.3901	-0.287825	0.00556183	3.03896	-1.08812	1.67979	-0.354023	-2.20121	-0.790905	-0.583408	0.213329	-1.11487	-1.23647	-0.200233	-2.42752	0.698845	-1.97562	1.165	0.214184	0.210655	-1.53096	0.520504		20	4.3901	0.0316294	0.0426559	0.961243	-1.70716	-1.23029	0.377426	-0.605556	-0.415821	1.02584	-0.623772	0.849434	-0.623505	1.10405	-0.24939	0.151432	1.16664	1.03573	0.640717	-0.0619125	1.3778	-2.58296
	20	4.42082	-0.320489	-0.234318	3.06434	-0.958633	1.82081	-0.458019	-2.16748	-0.760696	-0.475086	0.0795288	-0.902603	-1.38096	-0.044796	-2.72765	0.599754	-1.77353	1.11081	-0.0962257	0.165512	-1.61352	0.342979		20	4.42082	0.0029211	-0.11668	0.850357	-1.79429	-1.22573	0.257179	-0.521919	-0.686497	1.10419	-0.348949	0.640507	-0.59169	1.11524	-0.15847	0.059536	1.09903	0.808163	0.565685	-0.0676575	1.68258	-2.61217
	20	4.45154	-0.337134	0.059494	2.97379	-1.23135	1.77754	-0.669178	-2.0627	-0.905926	-0.28162	-0.236923	-0.826546	-1.58064	-0.127789	-2.7677	0.495628	-1.56101	1.04878	-0.0193596	0.474266	-1.89806	0.59663		20	4.45154	-0.035218	-0.139034	1.2933	-1.93962	-1.52662	0.158733	-0.545269	-0.708038	1.28567	-0.396526	0.306278	-0.249882	0.87328	-0.0472717	0.060276	1.24081	0.71064	0.572311	-0.25	1.22825	-2.63165
	20	4.48226	-0.2989	0.0882378	3.08042	-1.16557	1.89947	-0.63905	-1.86492	-0.81813	-0.0849838	-0.237194	-0.598667	-1.44167	-0.18829	-2.61506	0.423233	-1.88144	1.01437	-0.187038	0.499012	-1.91716	0.656425		20	4.48226	-0.0168318	-0.26543	1.09608	-1.96684	-1.54841	0.287861	-0.414856	-0.522858	1.69283	-0.50547	0.391155	-0.0848618	0.95562	-0.076622	0.287476	1.21058	0.815163	0.496353	-0.421001	1.06188	-2.82528
	20	4.51298	-0.249155	-0.0216408	2.87519	-1.00498	2.02387	-0.73418	-1.71299	-0.694988	0.225292	-0.439518	-0.502296	-1.48176	0.0490303	-2.62647	0.323467	-1.73848	1.00566	0.00428391	0.522434	-1.9149	0.859871		20	4.51298	0.080397	-0.369141	1.2588	-2.18935	-1.26871	0.0389175	-0.334522	-0.388927	2.00026	-0.47065	0.816914	0.00127792	1.1347	0.104481	0.313988	1.44662	0.717422	0.29504	-0.306324	1.08802	-2.28089
	20	4.5437	-0.213301	0.103565	2.9473	-0.995411	1.83953	-0.818771	-1.86072	-0.704369	0.387218	-0.316124	-0.560455	-1.21207	-0.0150299	-2.76692	0.509777	-1.56976	0.987782	-0.0526428	0.961185	-1.77914	0.649036		20	4.5437	0.058149	-0.377987	1.07195	-2.2644	-1.36961	0.0992012	-0.323803	-0.319668	2.16945	-0.650631	0.674374	0.124947	0.802135	-0.147671	0.491798	1.81355	0.747986	0.0590935	-0.372627	1.03619	-2.1013
	20	4.57442	-0.170835	0.15424	2.90949	-0.905933	1.87172	-0.645321	-1.54578	-0.705025	0.66655	-0.494423	-0.491982	-1.14882	-0.00897598	-2.75984	0.394192	-1.27539	0.988983	-0.22311	1.10627	-1.99238	0.688828		20	4.57442	0.079829	-0.589287	1.045	-2.30178	-1.52999	-0.125233	-0.058918	-0.39875	2.195	-0.491726	0.28257	0.489815	0.96244	0.239857	0.734844	1.88159	0.704559	0.113819	-0.0599556	0.644947	-2.14221
	20	4.60514	-0.12071	0.227974	2.92685	-0.965561	1.87215	-0.794586	-1.61374	-0.728889	0.823334	-0.42812	-0.157028	-1.39083	-0.0363197	-2.22236	0.59877	-1.22126	1.00083	-0.350285	1.25505	-1.92323	0.713051		20	4.60514	0.156916	-0.303566	1.03674	-2.47524	-1.49967	0.198112	0.250107	-0.327915	2.46371	-0.265064	0.315434	0.527481	0.924339	0.558731	0.581039	1.95903	0.578232	0.42746	-0.514462	0.773106	-2.06928
	20	4.63586	-0.0268183	0.393078	2.97865	-0.811958	1.87643	-0.655994	-1.16617	-0.400932	1.09432	-0.391323	-0.146015	-1.18233	0.0223274	-2.3834	0.553886	-1.10799	0.975132	-0.0253448	1.48325	-2.23404	0.592052		20	4.63586	0.247627	-0.422421	1.22553	-2.08408	-1.64775	0.24118	0.532883	-0.114674	2.56699	-0.447834	0.206348	0.894981	0.838425	0.820263	0.872829	1.89309	0.694725	0.337791	-0.39994	0.659752	-1.71555
	20	4.66658	0.0580893	0.304802	2.82189	-0.987194	2.07657	-0.484795	-1.409	0.0533142	1.11643	-0.326912	-0.0172424	-0.799778	0.12151	-2.4926	0.666576	-0.954788	1.0606	0.187794	1.48013	-1.84889	0.593365		20	4.66658	0.235364	-0.492546	1.37915	-2.02999	-1.72513	0.183807	0.74181	0.0883522	2.6534	-0.561558	0.485775	0.72184	0.738525	0.827454	0.905979	1.76468	0.578533	0.106918	-0.635906	0.789963	-1.81379
	20	4.6973	0.0437664	0.0740128	2.71912	-0.741196	2.01035	-0.535793	-1.27042	-0.0205612	1.46931	-0.496712	-0.0474892	-0.900162	0.129093	-2.48457	0.82766	-0.642212	0.931278	0.00419617	1.46704	-2.01365	0.396027		20	4.6973	0.264378	-0.409042	1.04129	-1.92873	-1.52114	0.203094	0.839775	0.150196	2.5994	-0.66626	0.286491	0.852493	0.746346	1.18968	1.09506	1.73377	0.88274	0.0920258	-0.585644	0.380543	-1.69454
	20	4.72802	0.0962585	0.221809	2.61015	-1.00735	1.83033	-0.731365	-1.33317	0.16753	1.36319	-0.433571	-0.0441742	-0.599255	0.106697	-2.19568	1.04733	-0.637573	1.30652	0.320805	1.62786	-1.93722	0.242317		20	4.72802	0.217434	-0.509609	1.07007	-2.0004	-1.47562	0.285645	1.03976	0.23592	2.36118	-0.883148	0.132877	0.973358	0.826241	1.3968	0.79483	1.61423	0.859993	-0.0833778	-0.620884	0.24984	-1.91904
	20	4.75875	0.159583	0.313564	2.68975	-0.966549	1.79819	-0.840538	-1.18148	0.342339	1.5299	-0.315292	0.0283279	-0.418343	-0.071785	-2.0988	0.985184	-0.834351	1.32345	0.481701	2.16708	-1.93686	0.196159		20	4.75875	0.22276	-0.693741	1.07224	-1.92888	-1.39819	0.330467	1.06763	0.208023	2.40798	-0.748741	0.189716	1.00959	0.527657	1.6459	0.798191	1.54619	0.978668	-0.31884	-0.58358	0.215221	-1.87032
	20	4.78946	0.154346	0.248932	2.46232	-0.904526	1.53266	-0.925121	-1.36017	0.525192	1.55424	-0.102058	-0.155025	-0.444416	0.229362	-2.15852	1.26585	-0.840084	1.34332	0.538342	2.06588	-1.83238	0.043129		20	4.78946	0.246732	-0.705685	1.11272	-1.76984	-1.49452	0.294624	1.47951	0.37022	2.56598	-0.983704	0.139004	1.28759	0.330116	1.92004	0.666718	1.63564	0.78735	-0.400032	-0.583096	-0.129929	-1.58807
	20	4.82019	0.139426	0.194294	2.41175	-0.989258	1.58068	-1.13476	-0.951748	0.49955	1.47136	0.0366364	-0.150497	-0.350586	0.199585	-2.09384	1.20621	-0.703224	1.51033	0.315453	1.60351	-1.87932	0.0123863		20	4.82019	0.253901	-1.00464	0.876518	-1.77991	-1.59225	0.314518	1.75053	0.327328	2.47969	-1.09925	-0.203533	1.08913	0.281609	2.19773	1.04132	1.90137	0.907787	-0.213745	-0.331303	-0.260494	-1.6044
	20	4.85091	0.225399	0.162251	2.22695	-1.05692	1.55773	-1.05959	-0.964291	1.36379	1.53011	0.389568	-0.0232277	-0.164902	0.456631	-2.30075	1.17469	-0.601524	1.73088	0.502777	1.47159	-1.77349	-0.1143		20	4.85091	0.201858	-1.0302	0.803375	-1.88307	-1.77539	0.257942	1.90404	0.423389	2.21042	-1.12027	-0.0199356	1.24439	0.174046	2.19369	0.876274	1.83605	0.667068	-0.263012	-0.50066	-0.403069	-1.55792
	20	4.88163	0.269222	0.310143	2.41447	-0.872505	1.83061	-1.10727	-0.574333	0.802711	1.66994	0.701969	0.10976	0.0591965	0.464382	-2.34363	1.01668	-0.70787	1.31306	0.639584	1.33315	-1.55825	-0.117352		20	4.88163	0.0905008	-1.29642	0.583637	-2.25017	-1.56858	0.300201	1.86708	0.31678	1.85814	-1.08871	0.0277252	1.13025	0.220383	2.48439	0.502495	1.40471	0.492249	-0.573647	-0.649837	-0.26989	-1.68077
	20	4.91235	0.358274	0.349331	2.1917	-1.0003	1.79435	-1.11877	-0.750786	0.921577	1.78334	0.921852	-0.0625687	0.215733	0.763168	-2.25505	1.24527	-0.4702	1.47926	0.815239	1.49794	-0.983513	-0.172092		20	4.91235	-0.0857269	-1.42065	0.482487	-2.45693	-1.66986	0.131592	2.28556	0.380032	1.6025	-1.2123	-0.220222	0.901466	-0.246319	2.31834	-0.015625	1.27722	0.47271	-0.834846	-0.734833	-0.723591	-2.03126
	20	4.94307	0.40669	0.375134	1.91742	-0.72538	2.02491	-1.00676	-0.632149	0.920502	1.74223	0.994057	0.0377121	0.155342	0.699818	-2.29675	1.30602	-0.296753	1.63485	0.967575	1.39203	-0.950123	-0.125885		20	4.94307	-0.228556	-1.68862	0.296162	-2.93243	-1.67885	0.208252	2.1214	0.380676	1.55401	-1.13639	-0.574368	0.669487	-0.428616	2.05877	-0.0659409	0.935947	0.164494	-0.804649	-0.710602	-0.83567	-2.10418
	20	4.97379	0.544227	0.380657	1.61705	-0.627754	1.9232	-1.00749	-0.561863	1.20224	1.76614	1.55141	0.154236	0.128052	0.947529	-2.01262	1.68984	0.122921	1.80073	0.930965	1.44099	-0.495148	-0.0665283		20	4.97379	-0.50262	-1.84985	0.04002	-3.13686	-1.69618	-0.0173492	2.0097	-0.283367	1.04399	-1.61928	-0.925056	0.418716	-0.748108	2.048	-0.351463	0.610149	-0.0528259	-1.04173	-0.65041	-1.13064	-2.71984
	20	5.00451	0.684005	0.902531	1.33023	-0.382103	2.04315	-0.76086	-0.244862	1.15608	1.80791	1.96429	0.0925331	0.270615	1.00664	-1.55403	1.85656	0.291721	1.75526	1.01633	1.33799	-0.418495	0.208603		20	5.00451	-0.78197	-2.3483	-0.475956	-3.73375	-1.69246	-0.385933	1.47123	-0.566433	1.00849	-1.80156	-1.33853	0.23822	-0.928593	1.91091	-0.493942	0.152035	-0.31498	-1.34195	-0.388458	-1.55639	-3.05305
	20	5.03523	0.855226	0.74744	0.917034	-0.0795021	2.25073	-0.804108	-0.133045	1.71537	2.0538	2.32423	0.156357	0.62849	1.03859	-1.51601	1.88201	0.587112	1.74663	1.18157	1.66484	0.0688667	0.674118		20	5.03523	-1.10361	-2.63301	-0.880768	-4.13071	-1.86218	-0.772896	1.44867	-0.79932	0.482754	-2.31642	-1.77198	-0.403271	-1.17564	1.90115	-1.01785	-0.0966187	-0.839153	-1.60888	-0.703983	-2.06823	-2.82393
	20	5.06595	1.06888	0.796707	0.963619	0.504265	2.61629	-0.701935	-0.130695	1.80299	1.9547	3.08707	0.454395	0.876854	0.906853	-1.32623	2.4104	1.01636	2.07429	1.18143	1.68629	0.364601	0.83934		20	5.06595	-1.45877	-3.16288	-1.51542	-4.23982	-2.09159	-0.724846	1.32318	-0.792118	0.121693	-3.54697	-2.02289	-0.907463	-1.55811	1.60182	-1.59163	-0.512531	-1.30444	-1.82236	-0.817436	-2.51461	-3.09706
	20	5.09667	1.45495	1.08794	1.06804	0.834095	2.77128	-0.394806	0.180271	2.17157	2.27259	3.41822	1.1377	1.33177	1.50855	-0.838558	2.65667	1.67979	2.32553	1.53114	2.149	0.911831	1.29646		20	5.09667	-1.90126	-3.70893	-1.88293	-4.67297	-2.54785	-1.45565	0.897675	-1.52523	-0.540691	-3.55903	-2.33109	-1.1288	-2.02769	1.11881	-2.17828	-0.962048	-1.88309	-2.18869	-0.979584	-3.0624	-3.4067
	20	5.12739	1.80104	1.36262	1.03158	0.955463	3.15148	-0.0625534	0.453308	2.34573	2.22581	3.94944	1.69849	1.95895	1.66227	-0.30291	3.06281	2.72404	2.54902	1.78505	2.55042	1.324	1.59573		20	5.12739	-2.23322	-4.23334	-2.27243	-5.0169	-3.04882	-1.57467	0.415211	-1.918	-1.06554	-3.65603	-2.82178	-1.50997	-2.23177	0.729389	-2.48626	-1.28527	-2.30993	-2.06153	-0.956051	-3.58608	-3.77465
	20	5.15811	2.22998	1.62499	1.10214	1.39023	3.58351	0.507816	0.763943	2.60896	2.47602	4.5572	2.27111	1.99525	1.71318	0.1371	3.7432	3.37099	2.9634	2.30106	3.1322	2.15725	2.19997		20	5.15811	-2.67408	-4.5608	-2.63961	-5.22346	-3.23518	-1.96286	-0.339539	-2.44147	-1.76908	-3.77341	-3.2823	-1.9201	-2.96341	0.329037	-3.34119	-1.85634	-2.56621	-2.34599	-1.18975	-4.21225	-4.1876
	20	5.18883	2.67822	2.04604	1.3572	2.03894	4.12408	0.764839	1.35593	2.78308	2.64388	5.19344	2.60508	2.55987	1.73302	0.69109	4.2168	4.12751	3.30783	2.61492	3.58985	2.88905	2.92184		20	5.18883	-3.09344	-4.91566	-3.05534	-5.72773	-3.7767	-2.50147	-0.867195	-2.89018	-2.41465	-4.09213	-3.77449	-2.09227	-3.19322	0.324184	-4.03094	-2.28169	-3.00394	-2.72261	-1.2454	-4.9533	-4.654
	20	5.21955	3.15406	2.36784	1.70402	3.00814	4.18686	1.5066	1.62033	3.02436	2.87825	5.69719	3.29768	2.74194	1.76848	1.2504	4.76287	4.97212	3.68141	2.86409	4.31178	3.79636	3.6404		20	5.21955	-3.55493	-5.78355	-3.77365	-6.04896	-3.97418	-3.18397	-1.12934	-3.4375	-3.16309	-4.9127	-4.18561	-2.42543	-3.65366	-0.213886	-4.3881	-2.53722	-3.44028	-3.2135	-1.35014	-5.32203	-4.96182
	20	5.25027	3.61544	2.35015	2.07058	3.47174	4.5252	1.97948	1.822	2.98691	2.7966	6.33258	3.62502	3.46398	2.00309	2.13127	5.09211	6.15426	4.11877	3.41589	4.97721	4.48359	4.50832		20	5.25027	-3.92053	-6.16217	-4.0339	-5.96948	-4.42001	-3.34957	-1.62187	-3.92873	-3.57068	-5.36257	-4.53116	-2.90232	-4.03987	-0.806446	-4.92638	-3.56707	-3.87703	-3.32898	-1.33011	-5.3581	-5.32412
	20	5.28099	4.14922	3.02707	2.20004	4.46647	4.70763	2.4993	2.18668	3.45494	3.16222	6.78152	4.41025	3.69603	2.25841	3.11844	5.43297	7.08832	4.35627	4.03895	5.29309	5.43727	5.36852		20	5.28099	-4.20805	-6.68403	-3.89796	-6.03423	-4.65377	-3.86478	-2.12609	-4.14715	-4.19844	-5.75862	-4.92241	-3.34918	-4.18788	-1.13124	-5.05066	-3.73335	-4.263	-3.39286	-1.25039	-5.89318	-5.62173
	20	5.31171	4.6713	3.32513	2.75951	5.28849	5.26509	2.6518	2.58197	3.37231	3.40002	7.37552	4.91094	3.95874	2.64542	3.75379	5.96347	8.11847	4.93314	4.71887	6.03899	6.23772	6.12663		20	5.31171	-4.54338	-6.79893	-4.26675	-6.10651	-4.92606	-4.17995	-2.76473	-4.61616	-4.4853	-5.81685	-5.3543	-3.80351	-4.35718	-1.44183	-5.39674	-4.25421	-4.80629	-3.94283	-1.52432	-6.12957	-5.89553
	20	5.34243	5.17577	4.04241	3.00043	6.12389	5.56084	3.11608	3.11799	3.50456	3.64538	7.63327	5.58665	4.24373	2.57166	4.23687	6.35167	10.0692	5.39361	5.02641	6.34306	7.21886	6.72887		20	5.34243	-4.85328	-7.13197	-4.8806	-6.22791	-5.22189	-4.36214	-3.26274	-5.24282	-5.00249	-6.16845	-5.63887	-4.01486	-4.73991	-1.86069	-5.89422	-4.47329	-5.13638	-4.14002	-1.2335	-6.31718	-6.11575
	20	5.37315	5.7168	4.19892	3.19187	6.46045	6.02094	3.38179	3.36134	3.59781	3.87481	8.05331	6.11067	4.95184	3.00458	4.85421	6.71524	12.9235	6.04407	5.3308	6.92383	8.03361	7.30249		20	5.37315	-5.13763	-7.30972	-5.17372	-6.49404	-5.46195	-4.55261	-3.48563	-5.52287	-5.67277	-6.25187	-5.74829	-4.48743	-4.87516	-2.48596	-6.20614	-4.91584	-5.51647	-4.38367	-1.18541	-6.62136	-6.40157
	20	5.40387	6.33925	4.23462	3.61065	7.24152	6.59363	3.99815	3.90137	3.73386	4.15235	8.32037	6.37623	5.19069	3.0905	5.14439	6.89769	17.51	6.24401	5.88903	7.09604	9.54598	8.01383		20	5.40387	-5.36311	-7.75639	-5.47352	-6.88551	-5.38742	-5.00529	-3.74329	-5.81046	-6.13093	-6.56712	-5.97349	-4.4759	-4.91901	-2.62523	-6.4962	-5.29551	-5.75811	-4.45113	-1.08393	-6.8632	-6.56057
	20	5.43459	7.10191	4.61702	4.0429	7.51205	6.62795	4.32188	4.19854	3.69818	4.36929	8.58195	7.1324	5.6771	3.0839	6.04039	7.13376	24.5405	6.52553	6.08691	7.70307	11.8626	8.28224		20	5.43459	-5.56429	-8.08691	-5.48019	-7.02236	-5.69581	-4.79242	-4.14817	-5.95182	-6.05877	-6.61309	-5.98216	-4.94696	-5.28524	-2.71135	-6.81045	-5.52974	-6.28876	-4.76027	-1.52952	-6.88901	-6.7029
	20	5.46531	8.01897	5.25089	4.46084	8.73668	6.80256	4.47507	4.73259	3.92844	4.62523	8.447	7.67714	5.70776	3.61058	6.83899	7.10937	33.2736	6.37828	6.38256	7.8695	15.462	8.61031		20	5.46531	-5.71436	-8.59851	-5.6661	-7.09824	-5.78613	-5.15193	-4.09336	-6.38788	-6.51617	-6.70704	-5.88971	-4.83747	-5.5042	-3.09369	-6.75618	-5.50978	-6.34657	-5.15118	-1.65078	-6.8144	-6.72789
	20	5.49603	9.05896	5.68032	4.58252	10.6079	7.17859	4.51643	5.21574	4.18823	4.8265	8.593	8.4248	6.099	3.75253	7.93982	7.10758	41.3016	6.5106	6.34264	8.18957	20.952	9.1697		20	5.49603	-5.94224	-8.51373	-6.05235	-7.26445	-5.9042	-5.29708	-4.41447	-6.668	-6.64416	-6.97435	-6.20496	-5.17191	-5.68379	-3.52946	-6.86644	-5.87908	-6.58302	-5.31033	-1.87601	-6.79607	-7.21087
	20	5.52675	10.202	6.16806	4.82165	13.8844	7.5106	4.908	5.58552	4.12544	4.82257	8.4835	9.55014	6.45856	3.65406	9.72563	7.0017	47.2624	6.4343	6.70065	8.27998	28.5169	10.145		20	5.52675	-5.97259	-8.71012	-6.10517	-7.12931	-5.73684	-5.57314	-4.37278	-7.01291	-6.71186	-7.05256	-6.21536	-5.30163	-5.60865	-3.27823	-7.22448	-5.96257	-6.69766	-5.14396	-1.48675	-7.0224	-7.10543
	20	5.55747	11.4722	6.1728	5.2774	18.4488	8.01458	4.76981	5.80366	4.41425	5.0048	8.60942	12.0112	6.77244	3.96796	13.1835	6.95518	49.6708	6.46071	6.87248	8.41701	37.2254	11.3912		20	5.55747	-6.1121	-8.9642	-6.18248	-7.21047	-5.67438	-5.72358	-4.76523	-7.20215	-6.84645	-7.00927	-5.89052	-5.62195	-5.89085	-3.84778	-7.26129	-6.27849	-6.95852	-5.38524	-1.58107	-6.94823	-6.99982
	20	5.58819	12.8565	6.71932	5.60616	25.8669	8.13882	4.88423	6.329	4.54993	4.83524	8.50815	15.5578	7.09641	4.14646	18.1815	6.68612	49.3234	6.25619	6.9209	8.79413	44.1623	14.5673		20	5.58819	-6.08736	-9.06154	-6.11408	-7.23758	-5.56731	-5.65723	-4.6558	-7.09061	-6.9544	-7.07602	-5.75866	-5.42712	-5.81966	-3.6158	-7.06044	-6.46373	-6.9132	-5.33603	-1.67855	-7.16452	-7.09489
	20	5.61891	14.33	6.98044	5.49764	34.5211	8.17865	5.05745	6.3718	4.52163	4.8573	8.71304	20.8652	7.69171	4.40035	25.8476	6.53342	46.4202	6.32975	7.00923	8.74003	48.8858	19.1781		20	5.61891	-6.18917	-8.90119	-6.46912	-7.21754	-5.51021	-5.79282	-4.58305	-7.30169	-7.29414	-7.00569	-5.95081	-5.22669	-5.97142	-3.59936	-7.17067	-6.68107	-6.8997	-5.71209	-1.92556	-7.39159	-7.17908
	20	5.64963	15.8341	7.18044	5.60003	43.0806	8.3751	5.2122	6.67718	4.46222	5.08437	8.44954	28.1332	7.8186	4.63497	34.7551	6.39661	42.102	6.19347	7.12033	9.0219	50.4371	25.9471		20	5.64963	-6.17194	-9.26788	-6.73032	-7.23615	-5.51265	-5.56995	-4.30846	-7.31182	-7.16649	-7.03467	-5.88465	-5.3023	-5.87767	-3.79071	-7.19459	-6.73579	-6.84521	-5.42329	-1.80268	-7.44132	-7.00227
	20	5.68035	17.0109	7.31752	5.4604	49.2353	8.37965	5.43535	6.93578	4.81654	5.12967	8.49872	35.9118	8.03685	4.81053	42.4948	6.39095	36.0449	6.32824	6.91953	9.44452	48.8792	33.7474		20	5.68035	-6.14481	-9.20192	-6.73411	-7.11316	-5.65622	-5.2561	-4.36941	-7.43297	-7.37589	-6.99118	-5.96268	-5.28514	-5.68335	-3.68598	-7.22197	-6.45653	-7.08769	-5.29746	-1.81109	-7.39291	-6.88037
	20	5.71107	17.7097	7.51307	5.54905	51.9977	8.53228	5.75815	6.96767	5.03186	5.1469	7.76449	42.6346	8.34251	5.17472	47.8075	6.39072	30.1447	6.02431	7.4179	9.27755	45.5794	41.138		20	5.71107	-6.09986	-9.17093	-6.90444	-7.22694	-5.21442	-5.01121	-4.32706	-7.41697	-7.31643	-6.8951	-5.59197	-5.32529	-5.68303	-3.87924	-7.08594	-6.76131	-6.81271	-5.40706	-1.74692	-7.44149	-6.77867
	20	5.74179	17.7506	7.61904	5.60581	51.4678	8.46743	5.87109	7.2977	5.27937	5.33464	7.69366	46.5452	8.58975	5.48072	49.5596	6.2203	24.3435	6.05409	7.27713	9.55925	40.4616	46.2849		20	5.74179	-6.12771	-9.34696	-7.01395	-7.26112	-5.32657	-5.15474	-4.38382	-7.23886	-7.40261	-6.65807	-5.64053	-5.20235	-5.76282	-3.98207	-6.8698	-6.79308	-7.02484	-5.38992	-2.01278	-7.31932	-6.76996
	20	5.77251	17.1527	8.12674	5.35834	48.0264	8.55664	5.79332	7.14888	5.36885	5.30461	7.76948	47.6219	8.95407	5.81725	48.4303	5.96239	19.432	6.05649	7.12979	9.31399	34.3921	48.4903		20	5.77251	-6.05525	-9.6241	-6.77575	-7.32462	-4.87403	-5.09557	-4.2043	-7.035	-7.26838	-6.54412	-5.85884	-5.2356	-5.54948	-3.93649	-6.88013	-6.95013	-7.12759	-5.1582	-1.85477	-7.17542	-6.63254
	20	5.80323	16.1437	7.81524	5.60883	42.8254	8.49442	6.1019	7.27197	5.62711	5.60994	7.82587	45.809	9.22726	6.17299	44.734	6.01774	15.0863	6.28413	7.14106	9.27011	28.2034	47.7472		20	5.80323	-5.96771	-9.52307	-6.7308	-6.97647	-4.79874	-5.03595	-4.0472	-6.85176	-7.28194	-6.59026	-5.65081	-5.07023	-5.39235	-4.14938	-6.73109	-6.83558	-6.9437	-5.34712	-1.8146	-7.16854	-6.41454
	20	5.83395	14.8076	7.78685	5.46568	36.3357	8.4567	5.79826	7.43345	5.69686	5.52333	7.69153	42.4494	9.19606	6.47701	39.3974	5.96398	12.0435	6.30045	7.15458	9.26723	22.5272	45.1872		20	5.83395	-5.85794	-9.30087	-7.08541	-6.90076	-4.70359	-4.96296	-4.11823	-6.79632	-7.01077	-6.25969	-5.60271	-4.89126	-5.48552	-3.83604	-6.63882	-6.82492	-6.57616	-5.2402	-1.65768	-7.01683	-6.25005
	20	5.86467	13.2893	8.00179	5.34492	29.6625	8.37976	5.86223	7.32279	5.84196	5.51795	7.49586	37.4723	9.03777	6.997	32.8912	6.07285	9.30947	6.63695	6.83726	8.81901	17.4	40.8824		20	5.86467	-5.71568	-9.30669	-7.10979	-6.60263	-4.23688	-4.8209	-4.05025	-7.02785	-6.83234	-6.0249	-5.48592	-4.03878	-5.45939	-4.11225	-6.61378	-6.563	-6.45805	-4.74542	-1.48511	-7.09399	-6.24573
	20	5.89539	11.7728	8.03033	5.43422	23.399	8.20252	5.85004	7.39378	6.16485	5.52328	7.16642	31.7544	9.11668	7.02974	26.5775	6.02713	7.36138	6.59655	6.70459	8.46454	13.1496	35.5086		20	5.89539	-5.60222	-9.21646	-6.99673	-6.65392	-4.13999	-4.89273	-3.87526	-6.94396	-6.44937	-5.7418	-5.1281	-4.63599	-5.1173	-4.14602	-6.49081	-6.67356	-6.19522	-4.60328	-1.25218	-6.99661	-5.89504
	20	5.92611	10.2836	7.72564	5.64913	17.5954	7.90636	5.68889	7.14429	6.23206	5.51429	6.9493	25.7964	8.8847	7.0384	20.7388	5.96762	5.62685	6.69738	6.77969	8.21753	9.87363	29.6445		20	5.92611	-5.52588	-9.25986	-7.0341	-6.24971	-3.79524	-4.66898	-3.91233	-6.84515	-6.4698	-5.8078	-5.05867	-5.0687	-4.99586	-4.29833	-6.26765	-6.5491	-6.25748	-4.4725	-1.20778	-6.70006	-5.59838
	20	5.95683	8.97207	7.35635	5.76839	12.7361	7.58619	5.71853	7.02228	6.23813	5.6842	6.99238	20.6928	8.82108	7.40531	15.5257	5.7429	4.2204	6.49796	6.6918	7.73486	6.9445	24.0615		20	5.95683	-5.42282	-9.05225	-6.86942	-6.32898	-3.58753	-4.48957	-4.1132	-6.54766	-6.24096	-5.51356	-4.83737	-5.17023	-4.77643	-4.47139	-6.04524	-6.65265	-6.11395	-4.36251	-1.18942	-6.5367	-5.5574
	20	5.98755	7.88878	7.17542	6.0163	8.76893	7.75656	6.1134	6.8777	6.70498	5.77667	6.81134	15.9995	8.76905	7.30015	11.1523	5.54462	3.07087	6.63847	6.25229	7.18981	4.81983	19.0375		20	5.98755	-5.21517	-9.18144	-7.01138	-5.78764	-3.16739	-4.36719	-4.29743	-6.59332	-5.84975	-5.22287	-4.59042	-4.95873	-4.40526	-4.22136	-5.67556	-6.63472	-5.86355	-3.86193	-1.05141	-6.11612	-5.44588
	20	6.01827	6.96737	6.92808	6.06652	5.5312	7.50935	6.13753	6.47607	6.34212	5.73579	6.47422	12.1693	8.52946	7.66295	8.03159	5.33684	2.25056	6.73909	6.11514	6.93941	3.11344	15.2587		20	6.01827	-5.14634	-9.07974	-6.93436	-5.64382	-2.77108	-4.55187	-4.07128	-6.63856	-5.57298	-5.05957	-4.39793	-5.16066	-4.16145	-4.22813	-5.56825	-6.79023	-5.87925	-3.8488	-1.0529	-6.05375	-5.46228
	20	6.04899	6.10107	6.58773	5.92017	3.03645	7.23508	6.0859	6.1649	6.19749	5.63029	6.29708	8.96708	8.02715	7.53236	5.19062	5.13536	1.37232	6.6578	6.01796	6.59507	1.77055	11.5999		20	6.04899	-4.92444	-8.80968	-6.8363	-5.22155	-2.57527	-4.38078	-3.9817	-6.51329	-5.59604	-5.19757	-3.94694	-4.82381	-3.7381	-4.09947	-5.46078	-6.40654	-5.48866	-3.47436	-0.71452	-5.85243	-5.37103
	20	6.07971	5.47973	6.44775	5.70108	1.14472	7.01859	5.87455	6.23803	6.05893	5.70525	6.47536	6.37771	8.00626	7.53856	3.02704	4.90907	0.973648	6.60431	5.58989	6.30553	0.66011	8.9383		20	6.07971	-4.86123	-8.58775	-6.53877	-5.23391	-2.42841	-4.47667	-4.08981	-6.25065	-5.18014	-5.04044	-3.57664	-4.96928	-3.78233	-4.37204	-5.47956	-6.71218	-5.3051	-3.452	-0.870411	-5.73544	-5.14297
	20	6.11043	4.88779	5.95396	5.89222	-0.208542	6.95678	5.78825	5.91879	6.17902	5.47696	6.02295	4.22916	7.76865	7.40081	1.23606	4.96655	0.239929	6.54197	5.32105	5.38528	-0.0981483	6.78413		20	6.11043	-4.6938	-8.63015	-6.70196	-5.08446	-2.02441	-4.34624	-4.01931	-6.23712	-4.99818	-4.89541	-3.54746	-4.86868	-3.55654	-4.16391	-5.02803	-6.55261	-5.02359	-2.99202	-0.880474	-5.5128	-4.81262
	20	6.14115	4.40026	5.5	5.61673	-1.44655	6.37188	5.84794	5.7389	5.97663	5.71712	5.75329	2.76028	7.28621	7.29564	0.125408	4.46972	-0.161369	6.38086	5.1465	5.09775	-0.710751	5.23911		20	6.14115	-4.54401	-8.46545	-6.66833	-5.18701	-1.70021	-4.36697	-3.5832	-5.9642	-4.73664	-5.11153	-3.15216	-4.90166	-3.38689	-3.87213	-4.81797	-6.45539	-4.83688	-3.05138	-0.852604	-5.10359	-4.66604
	20	6.17187	3.9859	5.38395	5.58789	-2.06193	6.46091	5.78344	5.36628	5.66566	5.62215	5.70349	1.20221	6.67375	7.18968	-0.837208	4.34158	-0.611145	5.88673	5.31358	4.67263	-1.30968	3.6841		20	6.17187	-4.31283	-8.23168	-6.91747	-4.81388	-1.37436	-3.91828	-3.74393	-5.62778	-4.29799	-4.60111	-2.71732	-4.78252	-2.98308	-3.81614	-4.83254	-6.49417	-4.54635	-2.71902	-0.771931	-4.70812	-4.35886
	20	6.20259	3.63122	5.04741	5.3129	-2.61765	6.39305	5.68971	4.99347	5.62913	5.81099	5.48665	-0.00737381	6.48043	6.95744	-1.51515	3.72588	-0.660091	5.6023	4.9531	4.5085	-1.74941	2.58318		20	6.20259	-4.18401	-7.92569	-6.45326	-4.79805	-1.25847	-3.71286	-3.71015	-5.90084	-3.95279	-4.89708	-2.72335	-4.76347	-2.83642	-3.70641	-4.41335	-6.69356	-4.18389	-2.45624	-0.54726	-4.51682	-4.23022
	20	6.23331	3.262	4.48928	5.39301	-2.86812	6.13174	5.45631	5.00826	5.4857	5.56315	5.16542	-0.67411	6.09129	6.70715	-2.5051	3.78313	-1.17513	5.26205	4.39077	4.1624	-2.2053	1.57813		20	6.23331	-3.97724	-7.60194	-6.54412	-4.75021	-1.20471	-3.49713	-3.35355	-5.53558	-3.76867	-4.75066	-2.55031	-4.61512	-2.60477	-3.39906	-4.05767	-6.38488	-3.85679	-1.84642	-0.719883	-4.15932	-4.34411
	20	6.26403	2.97879	4.62306	5.0654	-3.11755	5.69555	5.6254	4.58413	5.30972	5.79262	4.88153	-1.3102	5.61687	6.3414	-2.94451	3.10653	-1.39204	4.95782	4.25059	3.90028	-2.21102	0.800262		20	6.26403	-3.91351	-7.41222	-6.25282	-4.7669	-1.37498	-3.53328	-3.65398	-5.50853	-3.56879	-4.59907	-2.59915	-4.47715	-2.63582	-3.4324	-3.99374	-6.38713	-3.43062	-1.6776	-0.637177	-4.06004	-4.26883
	20	6.29475	2.73744	4.48417	5.06191	-3.15455	5.73749	5.51101	4.36852	4.9678	5.5338	4.83797	-1.88018	5.05836	6.29065	-3.3509	3.07278	-1.87542	4.6874	3.94142	3.70386	-2.33535	0.0880203		20	6.29475	-3.68882	-6.8035	-6.08057	-4.48433	-1.16515	-3.02473	-3.35453	-5.67558	-3.30022	-4.22091	-2.23937	-4.52383	-2.44537	-3.3706	-3.74349	-6.17836	-3.16904	-1.51126	-0.476307	-3.75034	-4.25882
	20	6.32547	2.50697	4.41601	4.67766	-3.3929	5.66491	5.34841	4.19927	4.46103	5.31816	4.60935	-2.51091	4.88614	5.9887	-3.61919	2.72356	-1.85835	4.41986	4.06243	3.60637	-2.375	-0.486172		20	6.32547	-3.55841	-6.65283	-5.89145	-4.24236	-1.05125	-2.85849	-3.30582	-5.69734	-3.23085	-4.19395	-2.0777	-4.56177	-2.41026	-3.16571	-3.36264	-5.80047	-2.99714	-1.41137	-0.32584	-3.86375	-4.06712
	20	6.35619	2.3166	4.21027	4.41394	-3.61214	5.24268	5.36588	3.67155	4.65992	5.36328	4.07907	-2.76279	4.45583	5.86704	-3.9269	2.53533	-1.91084	4.07261	4.08075	3.47472	-2.02032	-0.927937		20	6.35619	-3.41583	-6.00556	-5.83661	-4.30689	-0.894825	-2.97684	-3.29511	-5.41576	-2.79739	-4.16412	-1.84597	-4.45604	-2.35122	-3.04432	-3.3818	-5.7038	-2.89608	-1.2534	-0.274662	-3.59089	-3.82527
	20	6.38691	2.19259	3.89937	4.31736	-3.48241	4.8261	5.15347	3.50871	4.52683	5.34291	4.13534	-3.07479	4.33178	5.66004	-3.94722	2.49814	-2.14861	3.81708	4.02462	3.68844	-2.05261	-1.17282		20	6.38691	-3.267	-6.08496	-5.74722	-4.30709	-0.859516	-2.65912	-3.25694	-5.55131	-2.58596	-3.99982	-1.81055	-4.45685	-2.29578	-2.8001	-3.01422	-5.14151	-2.40752	-1.15509	0.0418015	-3.41105	-3.83727
	20	6.41763	1.985	3.62804	4.03463	-3.61279	5.03401	5.19325	3.23399	4.05035	4.8854	3.85233	-3.19164	3.66976	5.34066	-3.96221	2.41176	-2.24801	3.51345	3.81379	3.62779	-2.04666	-1.52789		20	6.41763	-3.06509	-5.7411	-5.7865	-4.11279	-0.668446	-2.43855	-3.0266	-5.37965	-2.29497	-3.61435	-1.52016	-4.48603	-2.09389	-2.69801	-2.81944	-5.06236	-2.22218	-0.876045	0.225883	-3.08375	-3.60277
	20	6.44835	1.77227	3.57077	3.7667	-3.762	4.88903	5.01428	3.10331	3.94482	4.74029	3.48365	-3.49149	3.05843	5.05124	-4.04592	2.10495	-2.36003	2.89643	3.5243	3.50755	-1.88297	-1.66787		20	6.44835	-2.97237	-5.50224	-5.6748	-4.01682	-0.866024	-2.3193	-3.19349	-5.1604	-1.95972	-3.55446	-1.49844	-4.52178	-1.87054	-2.65334	-2.64534	-5.0517	-1.81977	-0.832035	0.345333	-3.10788	-3.54474
	20	6.47907	1.65191	3.3602	3.41554	-3.863	4.86292	4.82678	2.88317	3.23376	4.77214	3.33329	-3.74177	2.86739	4.81251	-3.98781	2.26405	-2.32008	2.82143	3.40897	3.52005	-1.57238	-1.85902		20	6.47907	-2.80311	-4.59959	-5.33786	-3.80992	-0.979641	-2.15345	-3.12186	-5.05642	-1.77669	-3.31404	-1.12513	-4.49503	-1.97358	-2.39945	-2.45343	-5.09987	-1.49339	-0.686035	0.371239	-3.04153	-3.51654
	20	6.50979	1.53035	3.15826	3.38845	-4.23151	4.97824	4.78255	2.80781	3.01994	4.60034	3.19575	-4.05576	3.3128	4.37887	-4.10199	2.06703	-2.02722	2.49244	3.33213	3.62027	-1.92549	-2.18582		20	6.50979	-2.70552	-4.49696	-5.26513	-3.74851	-0.852325	-2.26273	-2.97814	-5.09656	-1.73323	-3.24447	-0.968151	-4.44518	-2.28405	-2.15043	-2.36673	-4.97329	-1.14845	-0.515186	0.450203	-2.81563	-3.21549
	20	6.54051	1.37383	3.02453	3.23928	-4.19892	4.68021	4.64989	2.42913	2.9647	4.33896	2.90232	-4.17805	2.32404	4.35685	-4.36368	2.17286	-2.07216	2.36337	3.38785	3.49903	-1.63789	-2.40581		20	6.54051	-2.56048	-3.93373	-5.13926	-3.80882	-0.874821	-2.05231	-2.85883	-4.84303	-1.25901	-3.17881	-1.03418	-4.28429	-1.89203	-2.19602	-2.42444	-4.6861	-1.16959	-0.251652	0.480221	-2.69039	-3.11244
	20	6.57123	1.17968	2.78221	2.92759	-4.16573	4.70902	4.62795	2.28941	2.52817	4.08777	2.45613	-4.48623	1.80389	4.0289	-4.44908	1.74718	-2.1604	2.07071	3.3359	3.66752	-1.61257	-2.59476		20	6.57123	-2.41143	-3.89521	-4.93022	-3.5702	-0.981621	-2.09953	-2.68337	-4.62997	-1.17279	-2.97121	-0.946598	-4.23401	-1.53635	-1.93103	-2.00901	-4.55256	-0.994686	-0.00302887	0.629421	-2.41277	-3.30394
	20	6.60195	1.09814	2.61977	2.66897	-4.27851	4.29939	4.24591	2.23229	2.20603	3.99843	2.42007	-4.09437	1.60371	3.8423	-4.36611	1.67705	-2.14189	1.85913	3.26228	3.82491	-1.21684	-2.69973		20	6.60195	-2.27105	-3.44719	-4.70759	-3.44845	-0.849701	-1.90266	-2.49834	-4.56947	-0.910358	-2.64406	-0.542992	-4.22135	-1.80937	-2.20568	-1.94261	-4.27607	-0.810661	0.101471	0.685696	-2.14978	-3.27176
	20	6.63267	0.992124	2.37728	2.5901	-4.21612	4.41476	4.01378	2.19519	1.95124	4.03318	2.09698	-4.29884	1.40552	3.73973	-4.42881	1.67033	-2.23765	1.7066	3.15845	3.73095	-1.32252	-2.73768		20	6.63267	-2.0865	-3.1012	-4.56482	-3.18956	-0.802113	-1.44402	-2.47129	-4.25815	-0.638077	-2.74472	-0.44574	-4.00829	-1.79837	-1.79092	-1.82697	-4.1463	-0.481716	0.315083	0.883503	-2.04472	-3.17159
	20	6.66339	0.928365	2.23908	2.2942	-4.3682	4.16298	4.001	1.89082	1.76461	3.87622	1.97218	-4.12899	1.13375	3.51627	-4.35217	1.44905	-1.79519	1.90556	3.11139	3.543	-1.27741	-2.37086		20	6.66339	-1.95718	-2.89018	-4.53456	-3.03776	-0.616756	-1.22099	-2.5373	-4.10914	-0.0987015	-2.41217	-0.182178	-4.08855	-1.56513	-1.72963	-1.78193	-3.97413	-0.478439	0.35796	0.826485	-2.09777	-2.97261
	20	6.69411	0.841392	2.11247	2.11474	-4.39717	3.71561	3.91012	1.89304	1.62792	3.46425	1.7598	-4.1133	0.997562	3.43197	-4.28493	1.37258	-1.38453	1.79914	3.0913	3.43047	-1.26888	-2.44433		20	6.69411	-1.86411	-2.74478	-4.43504	-3.0937	-0.659817	-1.00315	-2.31455	-3.89497	-0.119469	-2.43051	-0.333195	-3.84061	-1.50244	-1.66297	-1.63015	-3.92096	-0.404732	0.611485	0.760529	-1.78265	-2.88053
	20	6.72483	0.796736	1.95993	2.01637	-4.38258	3.51479	3.79418	1.73604	1.67594	3.71515	1.63936	-4.03181	0.679443	3.33003	-4.31135	1.26447	-1.30611	1.45246	3.04444	3.54136	-1.22158	-2.17579		20	6.72483	-1.70763	-2.25155	-3.92223	-2.49392	-0.601665	-0.865417	-2.26888	-3.77567	-0.0394897	-2.37757	-0.0663681	-3.77981	-1.65378	-1.66346	-1.49895	-3.55938	-0.656166	0.921604	0.832077	-1.48228	-2.94969
	20	6.75555	0.607984	1.73886	1.87518	-4.24746	3.51369	3.47875	1.24493	1.15527	3.65334	1.42562	-4.19472	0.519535	2.81546	-4.4081	0.89959	-1.1655	1.32581	2.82442	3.29576	-1.37634	-2.21442		20	6.75555	-1.52195	-2.177	-3.78796	-2.12857	-0.85154	-0.816185	-2.20249	-3.27997	0.426918	-2.28933	0.100643	-3.51352	-1.58878	-1.43576	-1.24566	-3.43481	-0.116432	0.873268	0.845867	-1.1521	-2.66562
	20	6.78627	0.557348	1.59028	1.95811	-4.1181	3.46441	3.11889	1.23531	0.966446	3.51757	1.41922	-4.18081	0.512833	2.65971	-4.46867	0.930553	-0.928253	1.00517	2.74181	3.16903	-1.14037	-2.30619		20	6.78627	-1.34684	-1.74099	-3.36328	-2.05428	-1.17547	-0.435913	-2.10617	-3.0958	0.607033	-2.33706	0.407429	-3.22383	-1.64793	-1.15612	-1.26601	-3.26264	-0.140991	1.23336	1.03037	-0.900028	-2.30854
	20	6.81699	0.407759	1.12548	1.71222	-4.3504	3.19179	3.0216	1.23635	0.784946	3.29551	1.0796	-4.23339	0.438702	2.28297	-4.53564	0.588684	-0.669899	0.955666	2.67653	3.10818	-1.27889	-2.27483		20	6.81699	-1.24543	-1.54635	-3.6139	-1.83122	-1.10344	-0.224651	-1.70612	-2.8781	0.775307	-2.43071	0.440887	-2.76965	-1.5434	-1.05299	-1.24868	-3.27208	-0.253418	1.50842	0.881477	-0.770805	-2.26918
	20	6.84771	0.26394	0.861271	1.27015	-4.02548	2.64484	3.09226	1.03469	0.475708	3.28417	0.952656	-3.93362	-0.107182	2.13593	-4.72139	0.317863	-0.562317	0.571133	2.61666	2.80956	-1.39064	-2.04745		20	6.84771	-1.10641	-1.231	-2.58489	-1.58258	-1.36022	0.0199509	-1.71183	-2.51841	1.00226	-2.56604	0.380402	-2.62247	-1.62823	-0.568718	-1.25934	-3.03731	-0.0380402	1.53107	0.752525	-0.712051	-2.39328
	20	6.87843	0.151468	0.812969	1.43149	-4.17107	2.71121	2.74077	0.884933	0.330441	2.80004	0.85302	-3.83189	-0.312698	1.99173	-4.64081	0.365368	-0.673229	0.4604	2.13058	2.7484	-1.67956	-1.92274		20	6.87843	-0.951456	-1.02674	-1.98839	-1.27742	-1.11152	0.257915	-1.4124	-2.58935	1.1178	-2.27303	0.352615	-2.55584	-1.63029	-0.546768	-1.0107	-2.8615	0.0197029	1.86142	0.759884	-0.751438	-2.36306
	20	6.90915	0.0721083	0.714443	1.44852	-4.35561	2.22141	2.62653	0.413483	0.414341	2.84839	0.595085	-3.75268	-0.391331	1.69155	-4.52288	0.169403	-0.29784	0.22633	2.15762	2.4653	-1.5285	-1.70138		20	6.90915	-0.883445	-0.78727	-1.57705	-0.972584	-1.13361	-0.00892258	-1.47271	-2.55038	1.37104	-2.54361	0.514297	-2.47545	-1.47105	-0.544804	-1.2407	-2.61617	0.00104523	1.89373	0.751499	-0.593151	-2.21305
	20	6.93987	-0.00469341	0.376987	1.1611	-4.449	2.25216	2.29662	0.109367	0.516464	2.66485	0.635616	-3.73568	-0.280106	1.55165	-4.38659	0.169998	-0.397125	0.184002	1.94678	2.59539	-1.43863	-1.86773		20	6.93987	-0.752517	-0.752201	-1.29732	-1.17292	-0.946667	0.211067	-1.24495	-2.15579	1.57142	-2.35358	0.249096	-2.23915	-1.33747	-0.444141	-1.15486	-2.28284	0.155254	1.99265	0.57996	-0.363483	-2.06443
	20	6.97059	-0.0430023	0.2076	0.876167	-4.25657	1.90687	2.07486	0.175137	0.409176	2.48158	0.702923	-3.43211	-0.383286	1.28227	-4.50382	0.036911	-0.221069	0.16098	1.92418	2.54867	-1.23784	-1.61266		20	6.97059	-0.648481	-0.495113	-0.964989	-0.787128	-1.20882	0.434338	-1.27851	-2.08366	1.62422	-2.5011	0.195747	-2.20171	-1.40641	-0.147121	-1.22562	-2.11049	0.197144	2.48793	0.738388	-0.220623	-2.0161
	20	7.00131	-0.09107	-0.246361	0.989822	-4.3166	1.61713	2.08562	0.128597	0.152088	2.36981	0.751965	-3.21644	-0.434532	1.17163	-4.54811	0.181572	0.0103149	0.216125	1.71141	2.42958	-1.52919	-1.34583		20	7.00131	-0.541794	-0.402973	-0.596214	-0.667229	-0.911133	0.478348	-1.35986	-1.86854	2.08983	-2.26346	0.277466	-1.82265	-1.32334	-0.309803	-1.05449	-2.16514	0.197357	2.58509	0.6381	-0.456474	-1.90075
	20	7.03203	-0.196436	-0.31567	0.981789	-4.20905	1.23269	2.11268	-0.205727	0.0940475	2.41798	0.515907	-3.1496	-0.638393	0.849072	-4.62539	-0.160309	0.096817	0.00486374	1.74347	1.96755	-1.45595	-1.1855		20	7.03203	-0.407672	-0.299919	-0.205505	-0.545933	-1.03401	0.803825	-1.32188	-1.8051	2.3787	-2.34408	0.374702	-1.77153	-1.11357	-0.220482	-0.995178	-1.90134	0.478214	2.91721	0.7701	-0.348949	-1.9687
	20	7.06275	-0.243896	-0.465778	1.24263	-4.39036	1.09047	1.77857	-0.557308	-0.144196	2.53946	0.659615	-3.21083	-0.730957	0.605492	-4.28405	-0.166481	0.123177	-0.0389671	1.44373	2.01262	-1.25744	-1.12733		20	7.06275	-0.318333	-0.352192	0.146782	-0.587727	-0.910164	1.34754	-1.31933	-1.40697	2.58941	-2.0864	0.669022	-1.43059	-1.09262	-0.245159	-1.10935	-2.03434	0.617134	2.70275	0.425644	-0.0910912	-2.19899
	20	7.09347	-0.314066	-0.468327	1.21047	-4.15784	0.628513	1.55548	-0.846764	0.228828	2.43311	0.383934	-3.10397	-0.731972	0.251045	-4.2705	-0.110264	0.095829	-0.0899429	1.3329	1.5905	-1.22265	-0.989712		20	7.09347	-0.200592	-0.369404	0.228973	-0.527359	-0.838799	1.35091	-1.02578	-1.36266	2.61064	-1.75737	0.607399	-1.10937	-1.03292	0.139576	-0.771709	-1.60654	0.565014	2.79038	0.449726	-0.0207405	-2.3318
	20	7.12419	-0.310799	-0.586632	1.41646	-3.94821	0.636955	1.22941	-1.01897	-0.19381	2.06859	0.301846	-3.17304	-0.200253	-0.00384903	-3.8815	0.21793	0.00220108	0.0429611	1.19955	1.52345	-0.895157	-0.953915		20	7.12419	-0.153648	-0.259495	0.57653	-0.424603	-0.8176	1.1679	-0.828217	-1.446	2.54269	-1.71191	0.534412	-1.18217	-0.437698	0.0206795	-0.752815	-1.66369	0.72802	2.8913	0.674889	-0.282261	-2.40293
	20	7.15491	-0.360666	-0.817314	1.34337	-3.75208	0.27562	1.11028	-0.931259	-0.291714	1.94481	0.0276985	-3.31796	-0.219261	-0.184772	-3.85918	0.273861	0.300972	-0.218632	1.21474	1.39526	-0.763035	-0.744728		20	7.15491	0.00662079	-0.125145	0.605011	-0.285305	-0.398174	1.44016	-0.716572	-1.28407	3.05403	-1.65707	0.388889	-1.19345	-0.415619	0.269791	-0.667282	-1.09192	0.874123	3.0692	0.895641	-0.158871	-2.47094
	20	7.18563	-0.427543	-1.05493	1.48665	-3.87988	0.387543	0.781639	-1.40242	-0.44899	1.8648	0.134239	-3.19681	-0.19553	-0.53236	-3.70723	-0.0138016	0.0560455	0.0906448	1.0681	1.23549	-0.733971	-0.490082		20	7.18563	0.0481625	-0.233719	1.0885	-0.221348	-0.210907	1.44758	-0.921398	-0.999767	3.25484	-1.39438	0.55172	-0.82589	-0.461613	0.269005	-0.741169	-1.34442	0.703773	3.11993	0.871689	-0.31358	-2.6756
	20	7.21635	-0.42055	-0.540367	1.63173	-3.77637	0.344765	0.569859	-1.34868	-0.362831	1.73072	0.199993	-3.07649	-0.214531	-0.805851	-3.54334	-0.245567	0.191612	-0.107845	0.920383	0.932674	-0.714291	-0.196556		20	7.21635	0.163496	-0.0845413	1.18889	-0.100018	-0.0926514	1.49416	-0.936943	-1.26783	3.41399	-1.53683	0.564117	-0.541718	-0.524498	0.481922	-0.641197	-0.803974	1.10004	3.2881	0.992352	-0.280762	-2.44268
	20	7.24707	-0.448298	-0.987667	1.84912	-4.17361	0.300259	0.393017	-1.34301	-0.606163	1.54183	0.557335	-3.04992	-0.451614	-0.764317	-3.48544	0.17363	0.0585976	0.0554543	0.632908	1.00296	-0.639317	-0.0300064		20	7.24707	0.232834	-0.117779	1.4824	-0.195503	-0.170376	1.85223	-0.976963	-1.14845	3.44386	-1.20658	0.283821	-0.463646	-0.109196	0.665493	-0.530254	-0.943363	1.21481	3.30075	0.815483	-0.189732	-2.35033
	20	7.27779	-0.508677	-1.25556	1.90491	-3.64338	0.171585	0.330334	-1.21027	-0.693592	1.31034	0.56414	-3.2915	-0.41378	-0.982925	-3.59121	0.0452194	0.078289	-0.117901	0.634838	0.640522	-0.653812	0.000213623		20	7.27779	0.341672	0.0276566	1.58303	0.0517616	0.286053	1.6983	-0.651054	-1.07083	3.3856	-1.30322	0.382587	-0.401672	0.0696182	1.10359	-0.839802	-0.921429	1.46745	3.23073	0.961117	-0.078846	-2.14719
	20	7.30851	-0.538372	-1.55392	1.84774	-3.5863	0.000843048	-0.16864	-1.50371	-0.807724	1.22508	0.697773	-3.37548	-0.148308	-1.11486	-3.48837	0.319496	-0.169521	0.075386	0.724735	0.819218	-0.580288	0.0194206		20	7.30851	0.371934	0.00131989	1.93348	0.0344048	0.249275	2.11708	-0.70887	-1.11416	3.45064	-1.22491	0.329967	-0.0522461	0.0208282	1.10391	-0.600681	-0.984608	1.35643	3.14798	0.833172	-0.167393	-2.28693
	20	7.33923	-0.547741	-1.50246	2.1456	-3.61872	-0.0621452	0.115269	-1.62704	-0.945183	0.985504	0.514526	-3.18013	-0.349533	-1.2194	-2.65607	0.109177	-0.254662	0.263489	0.498104	0.442223	-0.785255	0.171898		20	7.33923	0.389614	-0.265373	1.84187	-0.0809441	0.198395	2.08651	-0.406834	-0.991375	3.43878	-1.15161	0.240799	0.330906	0.112797	1.48831	-0.551125	-0.874092	0.932449	3.11929	0.743526	0.0555305	-2.47552
	20	7.36995	-0.537497	-1.49036	2.2578	-3.30257	-0.285416	0.125607	-1.47906	-1.01753	0.706398	0.570923	-3.24519	-0.268654	-1.40259	-2.55384	0.130619	0.0826302	0.255726	0.636673	0.323879	-0.849522	0.0545387		20	7.36995	0.39639	-0.175133	2.19185	-0.0273247	0.366745	2.06963	-0.351852	-0.942307	3.18932	-1.07071	0.147087	0.29866	0.125385	1.3331	-0.624691	-0.821125	0.969906	3.00528	0.901672	0.00217819	-2.65987
	20	7.40067	-0.569203	-1.4306	2.52129	-3.02405	-0.33131	-0.191921	-1.69631	-1.28312	0.700855	0.640934	-3.20978	-0.47356	-1.54554	-2.29751	0.0137253	0.311668	0.249527	0.487782	0.386967	-1.16426	-0.0488625		20	7.40067	0.51556	0.0513306	2.16663	0.257946	0.680145	2.2349	-0.335953	-0.954029	3.2279	-1.12044	0.154823	0.711399	0.0601997	1.42577	-0.666008	-0.593666	1.09547	3.15017	0.964447	0.07938	-2.27922
	20	7.43139	-0.593148	-1.57801	2.47763	-2.96724	-0.202335	-0.366131	-1.84247	-1.14456	0.657429	0.743587	-3.53432	-0.363052	-1.63636	-2.22128	-0.115128	0.186211	0.531544	0.319923	0.361897	-1.02987	-0.140408		20	7.43139	0.518388	-0.0819206	2.46675	0.461315	0.376602	2.04352	-0.28878	-0.87891	2.81691	-1.00173	0.210411	0.75547	0.22385	1.41941	-0.353737	-0.543598	0.918659	2.99889	1.05016	-0.00624466	-2.21925
	20	7.46211	-0.66985	-1.4823	1.85223	-2.98914	-0.381508	-0.649841	-1.81753	-1.0581	0.36805	0.337059	-3.57005	-0.44545	-1.92083	-2.04176	-0.17482	0.0982361	0.670979	0.412464	0.309338	-1.02825	0.114223		20	7.46211	0.60197	-0.0764275	2.76598	0.405956	0.336418	2.03518	0.0961494	-0.796703	2.83961	-0.6091	0.257927	1.06868	0.119247	1.44215	0.0621605	-0.376492	0.802811	2.72131	1.15436	-0.089756	-2.12004
	20	7.49283	-0.704048	-1.24705	2.37921	-3.28513	-0.583878	-0.885456	-1.95098	-0.989063	0.0331764	0.363071	-3.57953	-0.293648	-2.07905	-2.14257	-0.120041	-0.120941	0.801098	0.33263	0.284626	-1.05986	0.062439		20	7.49283	0.636083	-0.259876	3.34766	0.408554	0.214218	2.17247	0.189941	-0.515705	2.62708	-0.669811	-0.0353851	1.23519	-0.0302811	1.61171	0.258949	-0.688602	0.94957	2.76917	1.44369	-0.210537	-2.09635
	20	7.52355	-0.73583	-1.36824	2.67927	-3.12878	-0.691071	-1.01501	-2.09615	-1.00674	0.186161	0.335438	-3.71161	-0.123539	-2.26341	-2.01614	-0.362869	-0.136406	0.77467	0.351311	0.121342	-0.900173	-0.344658		20	7.52355	0.716709	-0.532497	3.35467	0.348164	0.441986	2.0425	0.368504	-0.264149	2.62372	-0.553844	-0.0121994	1.51295	0.208641	1.74695	-0.105152	0.173485	0.881618	2.63612	1.5073	-0.0297279	-2.01484
	20	7.55427	-0.740929	-1.55138	2.68712	-3.07343	-0.58271	-1.19693	-2.07515	-1.0321	0.0118828	0.563137	-3.60067	-0.167301	-2.31067	-1.91378	-0.545391	-0.0652466	0.565002	0.434914	-0.127495	-0.726974	-0.111423		20	7.55427	0.711516	-0.341213	3.11146	0.471622	0.541672	2.40037	0.365131	-0.386623	2.53458	-0.593063	-0.0550766	1.51762	0.454475	1.91782	0.277714	-0.159992	0.889526	2.4594	1.36971	-0.248337	-2.29648
	20	7.58499	-0.775291	-1.52204	2.42353	-2.84328	-0.528721	-1.40439	-2.08537	-1.15293	-0.235985	0.498096	-3.52785	-0.242199	-2.19268	-1.91557	-0.614735	0.0693245	0.533165	0.570988	-0.282497	-0.727192	-0.325466		20	7.58499	0.754892	-0.488377	3.06508	0.461269	0.541161	2.37879	0.769371	-0.507862	2.23356	-0.449154	0.125629	1.85174	0.654686	2.00958	0.308144	-0.0817337	0.757477	2.25002	1.46331	-0.141476	-2.10338
	20	7.61571	-0.893304	-1.30763	2.78377	-2.76945	-0.425606	-1.53574	-2.21495	-1.36416	-0.328682	0.261459	-4.06039	-0.436142	-2.55994	-1.98232	-0.613247	-0.300518	0.354458	0.450695	-0.550838	-0.641743	-0.625099		20	7.61571	0.729348	-0.567806	3.27123	0.542103	0.991272	2.19761	0.463203	-0.413113	2.01047	-0.503155	0.00695801	1.67134	0.55143	1.86675	0.544983	-0.179794	0.6754	1.98114	1.64381	0.0282173	-2.19508
	20	7.64643	-0.938812	-1.55442	2.4758	-2.94708	-0.488907	-2.00005	-2.34391	-1.36178	-0.498665	0.226326	-4.0325	-0.53896	-2.49141	-1.82555	-0.587639	0.0414772	0.328682	0.777832	-0.829716	-0.625385	-0.50037		20	7.64643	0.727466	-0.445595	3.47527	0.472523	0.57547	2.23441	0.566582	-0.427681	1.59207	-0.637722	0.196365	1.75222	0.634232	1.96839	0.479439	-0.209835	0.487587	2.05432	1.6088	0.0256767	-1.8532
	20	7.67715	-0.959769	-1.47245	2.50942	-2.88396	-0.563934	-2.22941	-2.31403	-1.24496	-0.552284	0.546497	-3.97065	-0.586563	-2.83093	-1.84318	-0.624271	-0.24794	0.329819	0.517033	-0.562927	-0.480213	-0.690449		20	7.67715	0.762856	-0.70927	3.75964	0.60807	0.487	2.08432	0.582428	-0.32346	1.89696	-0.510418	0.0240135	1.85877	0.733089	2.29586	0.674011	-0.108768	0.28035	2.03996	1.66302	-0.278355	-1.80011
	20	7.70787	-0.938201	-1.38755	2.67505	-2.98613	-0.537865	-2.57142	-2.31948	-1.22792	-0.554562	0.250107	-3.77567	-0.68301	-2.52537	-1.66964	-0.49588	-0.193863	0.22644	0.630013	-0.637409	-0.311947	-0.667908		20	7.70787	0.748321	-0.671886	3.51214	0.483894	0.320488	1.9832	0.945953	-0.322227	1.82309	-0.792309	0.403732	1.95079	0.862194	2.08835	0.669041	-0.0134583	0.246758	1.75995	1.66402	0.0324516	-1.97976
	20	7.73859	-1.01111	-1.15078	2.63287	-3.11353	-0.475182	-2.65819	-2.22439	-1.22426	-0.633526	0.0749741	-3.62396	-1.01525	-2.62395	-1.62342	-0.609631	-0.311676	0.368992	0.201622	-0.83643	-0.589584	-0.786842		20	7.73859	0.701108	-1.01707	3.23785	0.483616	0.231537	1.93348	0.858524	-0.506405	1.84538	-0.838985	0.331001	1.7942	0.780605	2.18811	1.14777	-0.0794182	0.0785065	1.77634	1.63755	0.391224	-2.25166
	20	7.76931	-0.989598	-1.20744	2.57821	-3.19149	-0.266781	-2.92125	-2.50345	-1.52775	-0.576962	0.0549393	-3.53236	-0.755291	-2.81722	-1.26379	-0.566097	-0.38863	0.739262	0.395012	-0.725471	-0.486374	-0.829033		20	7.76931	0.650713	-1.09798	3.40339	0.636456	0.162888	1.69464	0.973553	-0.515633	1.85085	-0.90575	0.229092	1.6094	0.733902	2.01722	1.14836	-0.196709	0.238415	1.51505	1.53902	0.0947342	-2.11663
	20	7.80003	-1.03073	-1.17843	2.8449	-3.1362	-0.0979805	-3.24318	-2.39037	-1.17304	-0.578846	0.0719948	-3.3495	-1.07771	-2.76805	-1.24065	-0.618858	-0.706356	0.298882	0.320591	-0.960979	-0.468826	-1.16201		20	7.80003	0.71228	-1.05895	3.36172	1.06274	-0.0654602	1.62369	0.802032	-0.149387	2.17895	-0.970375	0.221161	1.69914	1.11279	1.90734	1.22191	0.0614357	0.241409	1.47799	1.59063	-0.00920105	-2.06396
	20	7.83075	-1.02258	-1.20227	2.43778	-3.10988	-0.290161	-3.52229	-2.40181	-1.42294	-0.50201	-0.0847168	-3.0263	-1.04857	-2.53293	-0.964237	-0.448032	-0.543015	0.202751	0.62064	-0.789902	-0.627365	-1.19636		20	7.83075	0.710728	-1.27387	3.39746	1.16918	-0.119583	1.44194	1.01424	-0.286991	2.2523	-0.921032	0.244812	1.71675	1.06548	1.81815	1.5345	-0.152218	-0.0659027	1.54074	1.82204	0.0922546	-2.0757
	20	7.86147	-1.06111	-1.07687	2.47603	-2.94308	-0.15284	-3.5314	-2.30058	-1.03967	-0.761593	-0.165359	-2.54167	-1.19497	-2.8577	-1.27776	-0.451225	-0.863846	0.225735	0.367496	-0.937115	-0.839626	-1.35619		20	7.86147	0.749969	-1.36263	3.09092	1.06433	-0.1203	1.62712	1.04964	-0.52269	2.29499	-0.822102	0.274925	1.71835	1.15268	1.77091	1.63625	0.120399	0.151703	1.68884	1.97641	0.376713	-2.16706
	20	7.89219	-1.03246	-0.806873	2.32687	-3.02235	-0.425114	-3.84824	-2.39337	-1.08311	-0.567791	-0.324757	-2.18673	-1.27043	-2.73492	-0.928902	-0.489326	-0.742714	0.325821	0.397991	-0.824272	-0.741909	-1.30907		20	7.89219	0.729612	-1.48308	3.3275	1.056	-0.0158234	1.5361	1.21732	-0.444553	2.50898	-1.12561	0.183422	1.53938	0.962685	1.5635	1.67327	0.181934	0.258106	1.53436	1.84781	0.243713	-1.97278
	20	7.92291	-1.0808	-0.804585	2.39542	-3.33725	-0.115646	-3.73774	-2.3633	-1.05481	-0.482906	-0.42165	-2.31755	-1.53972	-2.75953	-0.91703	-0.782665	-1.0045	0.39624	0.262093	-1.03461	-0.896324	-1.0999		20	7.92291	0.773864	-1.60556	3.02621	1.25275	-0.139526	1.74622	1.23408	-0.469738	2.54419	-1.06284	0.0296173	1.66108	1.03717	1.67928	1.81759	0.205456	0.369495	1.79262	1.90521	0.514652	-2.06067
	20	7.95363	-1.04861	-0.673058	2.23656	-3.46761	-0.317757	-3.85532	-2.1617	-1.22073	-0.42738	-0.17255	-2.0686	-1.41986	-2.77296	-0.865246	-0.487656	-0.986725	0.606228	0.164021	-0.923725	-0.963676	-1.19457		20	7.95363	0.622135	-1.64549	2.81377	1.07485	-0.136223	1.2222	1.10373	-0.621086	2.39957	-1.47181	-0.103943	1.38789	1.19534	1.58387	1.79466	0.101803	0.192802	1.42747	1.87801	0.340366	-2.09506
	20	7.98435	-1.03845	-0.606792	2.43736	-3.13655	-0.50079	-3.94701	-2.28691	-0.981457	-0.465954	-0.279346	-1.84717	-1.51191	-2.64009	-0.76487	-0.326462	-1.04774	0.594975	-0.037693	-1.13008	-1.02951	-1.26107		20	7.98435	0.630482	-1.90959	2.55107	0.936031	-0.284889	1.35791	1.19793	-0.753948	2.53632	-1.32565	-0.0885773	1.30647	1.14125	1.47586	1.77508	0.353992	0.396889	1.53222	1.78431	0.641022	-2.01404
	20	8.01507	-1.06282	-0.316669	2.04567	-3.25419	-0.486496	-3.92072	-2.49417	-0.761959	-0.514473	-0.269634	-1.93359	-1.63223	-2.80475	-0.712467	-0.253365	-1.09852	0.516811	0.22459	-0.974987	-1.28569	-1.32957		20	8.01507	0.639181	-1.97264	2.58061	0.918171	-0.143139	1.52356	1.27422	-0.786682	2.36029	-1.61812	0.128384	1.20796	1.20605	1.27187	1.5968	0.475586	0.377029	1.62985	2.21258	0.534012	-1.99277
	20	8.04579	-1.09213	-0.0205917	1.83182	-3.28318	-0.46051	-4.08251	-2.52051	-0.657661	-0.778164	-0.114288	-1.95	-1.77851	-2.93451	-0.635529	-0.169834	-1.17871	0.52631	0.255371	-1.14336	-1.31769	-1.4306		20	8.04579	0.678662	-1.92711	2.34598	0.856613	-0.138611	1.35154	1.37669	-0.371548	2.56676	-1.65991	0.0375938	1.22637	1.37934	1.11602	1.73262	0.465214	0.495285	1.70946	2.18733	0.684296	-1.86069
	20	8.07651	-1.06884	-0.11665	1.66109	-3.20656	-0.631958	-4.15549	-2.54443	-0.44075	-0.94434	-0.275032	-1.96092	-1.6926	-2.87424	-0.62331	-0.564213	-0.0747375	0.464153	0.130032	-1.06251	-1.391	-1.07334		20	8.07651	0.649077	-1.85229	2.23875	0.647243	-0.214642	1.4654	1.46878	-0.356789	2.57766	-1.98606	0.0704498	0.876598	1.25719	1.0952	1.95645	0.529133	0.628109	1.60022	2.08528	0.565174	-1.6703
	20	8.10723	-1.1176	0.066143	1.6159	-3.08439	-0.882942	-4.2993	-2.74112	-0.457832	-0.952957	-0.344532	-1.98273	-1.71169	-2.88293	-0.768829	-0.346634	-0.769478	0.533318	-0.0158653	-0.766823	-1.37768	-1.18165		20	8.10723	0.588932	-2.08445	1.8888	0.45956	-0.218002	1.78646	1.36601	-0.181599	2.49393	-1.90157	-0.149506	0.888878	1.51355	0.861977	1.94822	0.470325	0.541222	1.65221	2.01831	0.396492	-1.97219
	20	8.13795	-1.14214	-0.0471535	1.65015	-3.12973	-0.801807	-4.11014	-2.52156	-0.281548	-1.04119	-0.170986	-2.0261	-1.76974	-3.07733	-1.05221	-0.440346	-1.11765	0.397846	-0.141537	-0.873386	-1.36317	-0.925243		20	8.13795	0.56752	-2.43341	1.7245	0.671803	-0.143173	1.54284	1.35889	0.0275536	2.1477	-1.57754	-0.169796	0.678379	1.58121	0.899227	2.0271	0.572933	0.286171	1.60079	2.28636	0.107933	-1.83907
	20	8.16867	-1.17791	-0.0921745	1.53851	-3.23068	-0.877098	-4.04972	-2.69394	-0.102741	-1.19703	-0.135643	-2.08895	-1.91497	-2.93435	-1.07241	-0.440464	-1.20181	0.306152	-0.195885	-0.939629	-1.23709	-0.998367		20	8.16867	0.707457	-2.30968	1.91571	0.567913	-0.0753784	1.68713	1.52722	0.30212	2.33981	-1.40575	0.21357	0.803764	1.39677	1.01743	2.02843	0.924297	0.35392	1.79581	2.48922	0.243664	-1.66683
	20	8.19939	-1.2011	-0.000694275	1.47683	-3.3761	-1.05378	-4.08534	-2.75028	0.0354919	-0.92778	-0.347393	-2.10143	-1.82085	-2.82099	-1.26864	-0.612206	-1.18212	0.419655	-0.204597	-0.980534	-1.50033	-0.920902		20	8.19939	0.67681	-2.22289	1.70187	0.274563	0.30143	1.411	1.53107	0.230114	2.24335	-1.44731	0.15033	0.910526	1.12448	0.764091	1.859	0.969624	0.544342	1.82065	2.46932	0.274502	-1.37386
	20	8.23011	-1.25706	-0.229828	1.43883	-3.38954	-1.19871	-4.32537	-2.89404	0.206306	-1.20611	-0.443466	-2.20737	-1.88214	-2.97628	-1.26863	-0.481339	-1.05427	0.356831	-0.146317	-1.13586	-1.48219	-0.821785		20	8.23011	0.626323	-2.38943	1.5177	0.29192	0.579315	1.32029	1.50261	0.391201	1.9437	-1.45721	0.0251732	0.93692	1.18904	0.705143	1.87129	0.854385	0.419899	1.83913	2.52616	0.0736809	-1.61445
	20	8.26083	-1.21444	-0.00767899	1.19992	-3.48498	-0.410927	-4.1691	-2.89397	0.219193	-1.39096	-0.516945	-2.24063	-1.78548	-2.98759	-1.25276	-0.544174	-0.9044	0.276279	-0.241089	-0.977242	-1.54597	-0.63031		20	8.26083	0.615818	-2.39439	1.33044	0.19606	0.772308	0.801575	1.69888	0.536518	1.89144	-1.50885	0.0985451	1.01691	1.12934	0.765297	1.96417	0.939461	0.384731	1.80054	2.68903	-0.0630264	-1.73262
	20	8.29155	-1.17945	-0.325027	0.705425	-3.54235	-0.848751	-3.87579	-3.03851	0.33149	-1.4626	-0.232643	-1.90928	-1.72983	-2.78297	-1.31325	-0.287926	-0.761944	0.516621	-0.407169	-0.823677	-1.20755	-0.59322		20	8.29155	0.560507	-2.25383	1.07299	-0.00860977	0.711082	1.08487	1.40002	0.657681	1.89486	-1.53875	0.296501	1.16056	0.997795	0.791866	1.64547	0.790249	0.265701	1.32088	2.57888	0.187908	-1.84599
	20	8.32227	-1.2434	0.118095	0.460796	-3.58677	-1.16935	-3.75962	-3.0042	0.475304	-1.62535	-0.157848	-2.08125	-1.72447	-3.05349	-1.40218	-0.453156	-0.643768	0.539398	-0.638565	-1.0108	-1.46231	-0.688515		20	8.32227	0.559589	-2.67297	1.08502	-0.128342	0.732349	0.718994	1.28469	0.497082	1.53416	-1.36155	0.194164	1.21042	0.95253	0.801609	1.9348	1.25093	0.364456	1.37881	2.78318	0.102093	-1.47063
	20	8.35299	-1.22707	0.0824776	0.217884	-3.63335	-1.13147	-3.51662	-3.21457	0.401085	-1.58585	-0.288811	-2.26772	-1.29549	-2.87577	-1.32259	-0.720631	-0.495403	0.457775	-0.482761	-1.17663	-1.03004	-0.663006		20	8.35299	0.570269	-2.47683	0.737011	0.00387192	0.849205	0.635143	1.69782	0.990955	1.47641	-1.36756	0.149223	1.01194	1.00842	0.827717	1.62114	1.20331	0.270649	1.89999	2.55027	-0.241863	-1.44144
	20	8.38371	-1.25978	0.227077	0.589054	-3.5123	-1.17186	-3.41877	-3.28553	0.681068	-1.6257	-0.446518	-2.62813	-1.26719	-2.95793	-1.54762	-0.741753	-0.561699	0.21777	-0.596149	-1.26611	-1.06983	-0.813438		20	8.38371	0.566001	-2.49278	0.591339	-0.51128	1.01831	0.743065	1.69003	0.849873	1.5383	-1.4879	0.413017	1.09585	0.700081	0.724861	1.89227	1.39214	0.288673	1.87234	2.6545	-0.236485	-1.41618
	20	8.41443	-1.24084	0.0891037	0.35104	-3.50758	-1.29691	-3.32969	-3.44315	0.931206	-1.61102	-0.156586	-2.22049	-1.38074	-2.44424	-1.98286	-0.610767	-0.465363	0.144169	-0.713715	-1.28812	-1.08422	-0.796879		20	8.41443	0.59966	-2.57051	0.44088	-0.689999	1.08286	0.910206	1.60958	1.0901	1.43766	-1.41523	0.596172	1.4299	0.818054	0.838619	1.80744	1.58868	0.318108	1.81637	2.68081	-0.290894	-1.5056
	20	8.44515	-1.25347	0.110241	0.327782	-3.49158	-1.17836	-3.05771	-3.34062	1.07389	-1.88212	-0.174515	-2.42262	-1.45882	-2.64163	-2.06851	-0.526329	-0.447067	0.26218	-0.704586	-1.71984	-0.894657	-0.834538		20	8.44515	0.63617	-2.654	0.372444	-0.790024	1.51997	1.01499	1.81761	0.83894	1.17664	-1.22883	0.683338	1.66673	0.617123	0.89867	1.68544	1.69896	0.284737	2.08449	2.83559	-0.226784	-1.57263
	20	8.47587	-1.2213	-0.0202904	0.379105	-3.54704	-1.16264	-3.25991	-3.6293	1.27599	-1.90001	-0.0395203	-2.44623	-0.891747	-2.61162	-1.91149	-0.413834	-0.669708	0.253643	-0.687077	-1.75447	-0.79491	-0.594952		20	8.47587	0.54174	-2.56251	0.0620117	-0.557392	1.16896	1.07034	1.02169	0.571697	0.954529	-1.07468	1.0271	1.4631	0.465084	0.878784	1.67318	1.71704	0.0493011	2.07848	2.71184	-0.257435	-1.62633
	20	8.50659	-1.26517	-0.0170631	0.446026	-3.57928	-1.17653	-3.0521	-3.50612	1.11993	-1.78938	-0.143177	-2.47601	-0.749996	-2.56633	-1.78793	-0.781521	-0.790421	-0.183094	-0.541817	-1.84671	-0.927246	-0.954582		20	8.50659	0.632493	-2.64	0.237404	-0.920071	1.16084	1.13198	1.67363	0.855251	0.987652	-1.10379	1.13927	1.77124	0.544132	0.906189	1.76192	1.56331	0.124226	2.30885	2.7348	-0.0462685	-1.54069
	20	8.53731	-1.28267	-0.25568	0.374096	-3.43	-1.38515	-2.92382	-3.70644	1.29545	-2.02756	-0.0616837	-2.61016	-0.709229	-2.45789	-1.95155	-0.89006	-0.496368	-0.234638	-0.692535	-1.60839	-0.880852	-1.00089		20	8.53731	0.596004	-2.16519	0.250027	-1.12178	0.85519	1.20661	2.05008	0.689213	1.12416	-1.14054	1.4157	1.82127	0.176857	0.699852	1.35346	1.82085	0.00945282	2.26765	2.54967	-0.185574	-1.75686
	20	8.56804	-1.31875	-0.0328712	0.364212	-3.5633	-1.31036	-2.91403	-3.49367	1.39637	-2.09242	-0.589458	-2.7281	-0.557411	-2.38738	-2.00273	-0.982399	-0.313393	-0.471649	-0.890923	-1.75454	-0.752903	-1.2981		20	8.56804	0.655753	-2.16919	0.17239	-1.19941	1.02161	1.59434	2.25187	0.74535	1.08563	-1.21526	1.37393	1.81908	0.216148	0.774487	1.35854	1.83839	0.150379	2.34865	2.70024	-0.00269318	-1.7494
	20	8.59875	-1.27043	-0.358082	0.34885	-3.64136	-1.30399	-2.86749	-3.55479	1.49808	-2.03839	-0.383869	-2.8341	-0.25523	-2.25225	-2.11971	-0.930248	-0.352303	-0.286232	-0.523933	-1.76059	-0.579155	-1.21371		20	8.59875	0.605544	-1.94954	0.132607	-0.900261	0.821087	1.7025	2.45655	0.612167	1.12002	-1.48936	1.4806	1.44505	-0.018486	0.62738	1.3436	1.93843	0.12817	2.5085	2.27073	-0.0333786	-2.08548
	20	8.62947	-1.28093	-0.256443	0.292545	-3.42619	-1.14418	-2.87815	-3.62437	1.40879	-1.87983	-0.0815315	-2.97351	-0.15271	-2.34829	-2.21252	-0.934978	-0.354832	-0.574589	-0.644596	-2.09731	-0.524822	-1.21106		20	8.62947	0.688194	-2.0739	0.152611	-0.834583	0.987717	1.89367	2.50073	0.943417	1.08652	-1.31011	1.68764	1.41743	0.125862	0.763412	1.22371	1.93504	0.307236	2.47182	2.28399	0.132381	-1.93071
	20	8.6602	-1.22575	-0.291435	-0.0477371	-3.55839	-1.18095	-2.66574	-3.5437	1.3423	-1.67924	0.00976944	-2.61911	0.270386	-2.12032	-2.24476	-0.935562	-0.546616	-0.602684	-0.418495	-1.94329	-0.475945	-1.2635		20	8.6602	0.704059	-2.02528	-0.097168	-0.549545	0.979431	2.05471	2.48515	0.656097	0.924065	-1.67388	1.71394	1.5798	-0.0769463	0.475746	1.16017	2.37998	0.436852	2.47179	2.44613	0.474106	-1.73398
	20	8.69092	-1.23178	-0.432198	0.008564	-3.20656	-0.856415	-2.7778	-3.49371	1.23834	-1.81426	-0.122196	-2.82527	0.467384	-1.97452	-2.4775	-1.04439	-0.682598	-0.400864	-0.418221	-2.00387	-0.534954	-1.28449		20	8.69092	0.754653	-2.027	-0.134136	-0.85899	0.848278	2.60719	2.61763	0.886967	1.04974	-1.75356	1.71222	1.75462	-0.45295	0.518139	1.19906	2.51845	0.782463	2.57499	2.42763	0.408772	-1.58644
	20	8.72163	-1.27314	-0.56831	0.254555	-3.38613	-1.01537	-2.72854	-3.5162	1.30226	-1.76957	-0.249401	-2.88038	0.644489	-1.80641	-2.65097	-1.37281	-0.665012	-0.496349	-0.513599	-2.09472	-0.50087	-1.44937		20	8.72163	0.693792	-2.01249	-0.169064	-0.890507	0.565228	2.57935	2.55923	0.634354	1.03394	-1.72281	1.70097	1.50655	-0.656807	0.634201	1.05468	2.38408	0.797005	2.55727	2.29681	0.604641	-1.58078
	20	8.75236	-1.34057	-0.848415	0.0813904	-3.48616	-0.85117	-2.69496	-3.58155	1.23393	-1.99323	-0.588329	-3.20595	0.718987	-1.58132	-2.81965	-1.38025	-0.664703	-0.33308	-0.522137	-2.14738	-0.720333	-1.42715		20	8.75236	0.702433	-1.97971	-0.218975	-0.761642	0.299404	2.51567	2.97634	0.665333	0.964638	-1.76344	1.78288	1.47117	-0.519871	0.463207	0.969971	2.68504	0.763783	2.44132	2.13435	0.837875	-1.67869
	20	8.78308	-1.30136	-0.808758	0.328926	-3.14643	-0.914696	-2.52114	-3.50346	1.42291	-2.0473	-0.435024	-3.38323	0.741589	-1.86848	-2.83363	-1.14683	-0.728172	-0.568417	-0.386738	-1.92067	-0.618973	-1.68873		20	8.78308	0.700997	-1.82783	-0.0166664	-0.686924	0.162407	2.5382	3.12383	0.778774	0.738625	-1.66913	1.52967	1.47804	-0.717411	0.414204	0.808754	2.81684	0.85923	2.38968	1.98091	1.019	-1.70026
	20	8.8138	-1.21098	-0.672295	0.387569	-2.93429	-0.815945	-2.56103	-3.47784	1.64749	-1.84263	-0.266605	-2.98534	1.01573	-1.92216	-2.89971	-1.20329	-0.442558	-0.372112	-0.34306	-2.05602	-0.690735	-1.78486		20	8.8138	0.693165	-1.55265	-0.0623474	-0.896778	0.347137	2.73756	3.07479	0.896099	0.474934	-1.55593	1.6357	1.61026	-0.897774	0.185654	0.463619	2.85489	1.10594	2.18794	1.75621	1.09671	-1.59867
	20	8.84452	-1.16992	-0.728767	0.677197	-2.93082	-0.811783	-2.40046	-3.13855	1.77047	-1.79297	0.0712585	-3.28883	1.03502	-1.68308	-2.84276	-1.20491	-0.590164	-0.466991	-0.500679	-1.91258	-0.876972	-1.78201		20	8.84452	0.71168	-1.30385	0.013649	-0.820938	-0.12516	2.5975	3.24308	0.890537	0.59877	-1.74879	1.62096	1.31909	-1.17622	0.393269	0.447884	3.19183	1.13739	2.38211	1.6689	1.33937	-1.43579
	20	8.87524	-1.1942	-1.04444	0.608654	-2.99483	-0.776604	-2.57798	-3.25854	1.58257	-1.82683	0.271599	-3.20081	1.13624	-1.63302	-2.77494	-1.25788	-0.385468	-0.465714	-0.374779	-2.02346	-0.92094	-1.96688		20	8.87524	0.708422	-1.67567	-0.0306702	-0.833847	-0.054306	2.44524	3.58867	0.946205	0.618198	-1.52917	1.44878	1.12928	-1.05898	0.126049	0.607185	3.24804	1.18255	2.22095	1.74768	1.472	-1.42974
	20	8.90596	-1.22362	-1.01583	0.797768	-2.93814	-0.707893	-2.58543	-3.25982	1.38748	-2.09548	0.319878	-3.30724	1.06221	-1.80534	-2.87085	-1.23648	-0.167995	-0.594246	-0.36417	-2.11816	-1.0112	-1.96141		20	8.90596	0.764249	-1.34723	0.0328445	-0.878109	-0.124359	2.71217	3.47591	0.61491	0.715012	-1.34578	1.57659	0.799553	-1.04519	0.314384	0.624622	3.63652	1.30562	2.39522	1.43836	1.64144	-1.25751
	20	8.93668	-1.14785	-1.31664	0.860409	-2.63977	-0.499954	-2.62616	-3.19867	1.33368	-2.04122	0.76836	-3.01319	1.33042	-1.50962	-2.84817	-1.30753	-0.121826	-0.614025	-0.823605	-1.89283	-1.10888	-1.68771		20	8.93668	0.735962	-1.28874	0.119316	-1.0828	-0.109879	2.72401	3.53677	0.633545	0.413517	-1.31984	1.45475	0.710026	-0.848423	0.261837	0.38382	3.56916	1.50067	2.29298	1.37957	1.66431	-1.27538
	20	8.9674	-1.1784	-1.25773	0.825958	-2.842	-0.218834	-2.38377	-3.13749	1.30145	-2.2897	0.964218	-3.26128	1.14602	-1.79023	-2.92417	-1.334	-0.0566177	-0.548985	-0.685955	-1.84604	-1.08211	-2.14671		20	8.9674	0.75607	-1.17833	-0.15781	-1.26018	0.183922	2.72854	3.70454	0.552242	0.4044	-1.39582	1.40032	0.954716	-0.886917	0.296734	0.5098	3.77813	1.3839	2.25525	1.30999	1.70579	-1.16782
	20	8.99812	-1.10935	-1.5887	0.886482	-3.18823	0.06493	-2.49787	-3.0987	1.20147	-2.05345	1.04934	-3.0062	1.00614	-1.93872	-2.78288	-1.23024	0.0470238	-0.477577	-0.139652	-1.57294	-1.09758	-1.76955		20	8.99812	0.682172	-1.16817	-0.2668	-1.29181	-0.142838	2.51917	3.59642	0.472763	0.413898	-1.49896	1.21378	0.730305	-0.886272	0.17564	0.318413	3.79952	1.48592	2.43732	1.12042	1.64383	-1.02911
	20	9.02884	-1.13745	-1.58117	1.13742	-2.78423	0.323734	-2.28699	-3.85748	1.18984	-2.17179	0.974815	-3.12488	0.694954	-1.81337	-2.91387	-1.17387	-0.264271	-0.638447	-0.0447845	-1.42927	-1.08368	-1.90164		20	9.02884	0.738677	-1.08463	-0.158264	-1.25424	0.0686874	2.29692	3.72744	0.601536	0.30455	-1.53252	1.11108	0.715675	-0.750908	-0.119442	0.403267	4.11332	1.8632	2.44281	1.03395	1.8742	-0.883099
	20	9.05956	-1.08244	-1.34837	0.753826	-2.47451	0.23175	-2.34798	-3.41594	1.07413	-2.16231	1.26222	-2.92898	0.983807	-1.85933	-2.61671	-1.08691	-0.26329	-1.01359	-0.246166	-1.09631	-1.07211	-2.02199		20	9.05956	0.686038	-0.938484	0.0837936	-1.38466	-0.0149765	1.99946	3.50821	0.422638	0.419479	-1.55547	0.945408	0.51886	-0.651276	0.0266609	0.432972	4.03873	1.84015	2.36388	0.785477	1.83471	-0.9548
	20	9.09028	-1.13573	-1.31532	1.04979	-2.49773	0.156101	-2.27311	-3.19118	1.17297	-2.07964	1.21084	-2.89652	0.797829	-1.90715	-2.92885	-1.46135	-0.345787	-0.860676	-0.465977	-1.23514	-1.31907	-2.32468		20	9.09028	0.637918	-0.944675	0.0123634	-1.39501	0.140736	1.81093	3.72098	-0.17107	0.3396	-1.6811	0.91581	0.195484	-0.347946	0.0422211	0.333729	3.994	1.68881	2.43224	0.880104	1.74204	-0.950867
	20	9.121	-1.12332	-1.65515	0.818558	-2.36393	0.297676	-2.13178	-3.15963	0.952999	-2.08413	1.30359	-2.95835	0.760456	-1.68879	-2.8453	-1.56328	-0.56385	-0.671112	-0.252136	-0.886738	-1.51253	-2.26305		20	9.121	0.545424	-0.99733	0.170944	-1.69026	0.0269737	1.68572	3.46019	-0.246651	0.248772	-1.78328	0.726204	-0.109825	-0.471069	-0.0348358	0.533894	4.20546	1.74013	2.13065	0.77388	1.58445	-1.04554
	20	9.15172	-1.0864	-1.62547	0.720432	-2.12199	0.533646	-2.04078	-3.13043	0.898163	-1.93658	1.51105	-2.96638	0.78138	-1.83729	-2.86229	-1.3885	-0.439938	-0.781116	-0.48275	-0.760067	-1.50534	-2.29385		20	9.15172	0.57426	-0.959362	0.0686302	-1.75014	-0.0800552	1.50091	3.62807	-0.170498	0.362198	-1.78106	0.685379	0.128548	-0.341423	-0.239937	0.607147	4.44883	1.95523	2.27692	0.304432	1.55191	-0.710541
	20	9.18244	-1.04305	-1.53377	0.766914	-2.26406	0.458664	-2.07156	-2.99931	0.845364	-1.57963	1.60974	-2.76547	0.845467	-1.88972	-2.80378	-1.25629	-0.0803642	-0.81599	-0.660084	-0.580593	-1.6137	-2.47279		20	9.18244	0.543289	-0.982773	0.650665	-1.84039	-0.120071	1.20007	3.58154	-0.571041	0.468628	-1.69545	0.414986	0.171928	-0.233421	-0.4049	0.466145	3.99366	1.83551	2.23771	0.21246	2.19141	-0.710888
	20	9.21316	-1.06126	-1.53653	0.863914	-1.96075	0.439034	-2.05814	-3.18432	0.681107	-1.43847	1.70285	-2.86486	0.796139	-1.86366	-2.95813	-1.33986	-0.317055	-0.77758	-0.617146	-0.627918	-1.72614	-2.43776		20	9.21316	0.578497	-0.797985	0.576248	-1.88451	-0.0585022	1.27715	3.72869	-0.448711	0.522034	-1.50859	0.306866	-0.104301	-0.124645	-0.213734	0.53566	3.87959	2.11361	2.30803	0.223583	1.90784	-0.668388
	20	9.24388	-1.08864	-1.57027	0.947186	-1.86543	0.310486	-1.8689	-3.18589	0.459984	-1.42398	1.9287	-2.94215	0.635548	-1.80472	-3.28423	-1.88271	-0.207203	-0.875271	-0.545273	-0.747417	-1.61685	-2.23447		20	9.24388	0.496284	-0.637794	0.474705	-1.71959	-0.0991364	1.08251	3.61031	-0.700901	0.372524	-1.84834	0.0626869	-0.369545	-0.371632	-0.231449	0.68692	4.02647	2.36083	2.42413	0.100952	1.54825	-0.846226
	20	9.2746	-1.17374	-1.73988	0.975327	-1.99555	0.215088	-1.60486	-3.43189	0.14526	-1.38201	1.74777	-2.95407	0.581276	-1.92841	-3.40601	-1.79943	-0.363426	-0.972939	-0.697289	-0.774086	-1.83545	-2.25428		20	9.2746	0.489202	-0.834011	0.583851	-1.94042	-0.0704079	1.404	3.72563	-1.11158	1.00457	-1.81656	0.0939789	-0.55687	-0.0639915	-0.485126	0.520195	3.99532	2.26231	2.48568	-0.30468	1.67196	-0.779816
	20	9.30532	-1.13762	-1.7103	0.753788	-1.97974	0.349697	-1.58486	-3.3769	0.144913	-1.23307	1.77341	-3.00088	0.253052	-1.68213	-3.33697	-1.60851	-0.260704	-0.764656	-0.684788	-0.813412	-1.69599	-2.29442		20	9.30532	0.414676	-1.00359	0.69611	-1.91221	-0.217319	1.07723	3.6421	-1.10136	0.32354	-1.67189	-0.0463295	-0.728855	0.0375404	-0.740261	0.602497	3.84327	2.41784	2.56526	-0.160984	1.55063	-0.8797
	20	9.33604	-1.06332	-1.53917	0.60516	-1.90624	0.328297	-1.44839	-3.4394	0.0408173	-0.977314	1.85884	-2.74709	0.37986	-1.8263	-3.30494	-1.43661	0.100929	-0.785408	-0.701748	-0.458141	-1.69014	-2.31937		20	9.33604	0.401491	-0.820065	0.747097	-1.90353	-0.26862	0.643036	3.44403	-1.01473	0.347656	-1.37863	-0.16568	-0.73716	0.186577	-0.341228	0.22438	3.76548	2.17327	2.42456	0.169487	1.52536	-0.991486
	20	9.36676	-1.09421	-1.72441	0.707748	-2.08415	0.174782	-1.12792	-3.12724	-0.225742	-0.978268	1.78382	-2.51077	0.0922775	-1.63715	-3.73774	-1.24168	-0.180355	-0.870754	-0.719296	-0.446747	-1.76793	-2.26277		20	9.36676	0.383803	-0.811874	0.927437	-1.81953	-0.229935	0.682388	3.29025	-1.07063	0.244526	-1.52871	-0.174637	-0.999252	0.203896	-0.332287	0.381355	3.42946	2.32526	2.65636	0.0903664	1.44519	-1.03359
	20	9.39748	-1.0814	-1.35583	0.751045	-2.13615	0.268978	-0.88517	-3.05505	-0.24781	-0.93362	1.61339	-2.71277	0.141499	-1.79883	-3.85999	-1.16069	-0.0138817	-0.694012	-0.813755	-0.532768	-1.70399	-2.49858		20	9.39748	0.439894	-0.78727	0.751125	-1.81179	-0.274303	0.78141	3.1437	-0.990063	0.399513	-1.40149	0.235695	-0.772278	0.386444	-0.388042	0.333157	3.62543	2.25954	2.75089	0.098114	1.4106	-0.952503
	20	9.4282	-1.11188	-1.31152	0.87109	-2.25317	0.370975	-0.712162	-3.28846	-0.319012	-0.765598	1.41164	-2.80388	-0.0772133	-1.76352	-3.76031	-1.37669	-0.366196	-1.00375	-0.803455	-0.346458	-1.661	-2.27886		20	9.4282	0.441184	-0.72224	1.02765	-1.8983	-0.311676	0.765213	3.00753	-1.18012	0.389915	-1.22134	0.0650368	-0.79113	0.608818	-0.625675	0.408951	3.71848	2.09833	2.6788	0.146633	1.6662	-1.00739
	20	9.45892	-1.08104	-1.39678	0.850529	-2.10342	0.215256	-0.596294	-3.28231	-0.579315	-0.50005	1.43418	-2.79251	0.0156746	-1.46872	-3.86073	-1.11839	-0.473755	-0.868107	-0.988182	-0.218807	-1.45941	-2.42958		20	9.45892	0.408682	-0.60091	0.963543	-2.02422	-0.153343	0.599236	2.70261	-1.24466	0.795036	-0.861355	-0.151009	-0.7775	0.377228	-0.824207	0.137009	3.47642	2.04109	2.95818	0.235493	1.5698	-1.0448
	20	9.48964	-1.15505	-1.34498	0.443748	-1.97543	0.0390015	-0.606602	-3.2078	-0.567944	-0.583828	1.39526	-2.92742	-0.348667	-1.75246	-3.89025	-1.0929	-0.797478	-0.865555	-1.03893	-0.205074	-1.55361	-2.22005		20	9.48964	0.424662	-0.80838	1.05331	-2.01078	0.104958	0.590622	2.54967	-1.39799	0.811378	-0.523865	-0.155548	-1.04445	0.497761	-0.551655	-0.118324	3.57015	1.92665	3.19847	0.452045	1.47078	-1.12157
	20	9.52036	-1.12362	-1.38502	0.284126	-2.08907	-0.267082	-0.589771	-3.10566	-0.763176	-0.43771	1.12851	-2.85188	-0.19783	-1.39335	-4.04284	-0.92873	-0.131901	-0.552975	-0.865314	-0.324905	-1.36393	-2.5939		20	9.52036	0.394307	-0.492039	1.14898	-2.10675	-0.142197	0.340115	2.38935	-1.31536	0.708275	-0.796352	-0.0659637	-0.854393	0.586296	-0.416424	-0.237461	3.67743	1.8499	3.02874	0.422413	1.67619	-1.5146
	20	9.55108	-1.14572	-1.19947	0.471928	-2.05493	-0.0280685	-0.461254	-2.87746	-0.839195	-0.613392	0.911896	-3.13563	-0.19503	-1.70654	-4.14753	-1.09129	-0.346069	-0.610973	-0.951347	-0.185154	-1.17948	-2.67549		20	9.55108	0.430115	-0.660721	1.2296	-2.00953	-0.23122	0.0541649	2.52369	-1.19408	0.777168	-0.336803	-0.126511	-1.09615	0.614563	-0.345222	-0.243565	3.60243	1.97966	3.21264	0.471264	1.90225	-1.52132
	20	9.5818	-1.06245	-1.17721	0.159435	-2.11472	-0.0503349	-0.267609	-2.74625	-0.824436	-0.420139	0.812683	-2.85892	-0.234203	-1.52162	-3.92172	-0.798687	-0.363892	-0.671482	-0.874554	-0.0152779	-1.08646	-2.27351		20	9.5818	0.416265	-0.626648	1.14886	-2.00013	-0.117821	-0.205212	2.55665	-1.54803	1.11384	0.0551262	-0.0421219	-1.1779	0.481915	-0.403694	-0.614559	3.44224	1.78867	3.33948	0.677654	1.81354	-1.35656
	20	9.61252	-1.05041	-1.27259	0.362854	-2.19755	0.248619	-0.10461	-2.85381	-0.761921	-0.345371	0.852127	-2.97471	-0.339333	-1.51426	-3.98754	-0.778576	-0.522629	-0.638187	-0.782906	-0.102207	-0.783871	-2.5117		20	9.61252	0.464646	-0.413597	1.43486	-1.59681	-0.242283	0.0325165	2.30484	-1.51556	1.12412	-0.0404243	-0.0434799	-1.2762	0.654366	-0.154285	-0.565086	3.29468	1.65705	3.45825	0.918621	1.90976	-1.64843
	20	9.64324	-1.09336	-1.60666	0.375252	-2.231	0.0553932	-0.111469	-3.00598	-0.927135	-0.292194	0.772911	-2.97417	-0.401485	-1.76484	-3.85025	-0.638004	-0.592533	-0.631271	-0.883327	0.235275	-0.709404	-2.68624		20	9.64324	0.434653	-0.416962	1.50558	-1.58893	-0.385193	-0.330452	1.89609	-1.68391	1.49389	0.0459938	-0.179764	-1.29887	0.696899	0.0928459	-0.536785	3.24734	1.54628	3.4868	0.764961	1.96901	-1.63176
	20	9.67396	-1.11544	-1.50834	0.449078	-2.07096	0.145882	-0.13744	-2.71966	-1.01099	-0.155437	0.390858	-3.23582	-0.422935	-1.76548	-3.58078	-0.898453	-0.545876	-0.51725	-0.999413	0.139431	-0.958061	-2.90723		20	9.67396	0.453594	-0.46183	1.42721	-1.4194	-0.472252	-0.0611343	1.69661	-1.54202	1.58987	0.248005	-0.239258	-1.23497	0.590599	0.127575	-0.653381	3.08958	1.69327	3.59239	0.774796	1.85271	-1.5265
	20	9.70468	-1.03952	-1.48634	0.347561	-2.24202	-0.0193253	0.153881	-2.68967	-1.02888	-0.0109673	0.385674	-2.94571	-0.27951	-1.62033	-3.87239	-1.03831	-0.433334	-0.743233	-0.763474	0.581005	-0.69146	-2.39354		20	9.70468	0.418084	-0.028347	1.52008	-1.41994	-0.37632	-0.397457	1.52959	-1.43362	1.49212	0.39735	-0.140945	-1.60342	0.487564	0.192051	-0.770653	3.12513	1.57108	3.42113	0.685173	1.70345	-1.59236
	20	9.7354	-1.02165	-1.44841	0.552181	-2.08599	-0.00247192	-0.0983772	-2.32191	-1.2322	-0.290916	0.479668	-3.0178	-0.168217	-1.87923	-3.76183	-1.19824	-0.339809	-0.901875	-0.775181	0.514988	0.00938034	-2.46676		20	9.7354	0.513138	0.0756264	1.47103	-1.21982	-0.406456	-0.332218	1.50636	-1.41589	1.55938	0.672081	-0.335758	-1.69161	0.759171	0.205132	-0.570164	3.29102	1.6798	3.59695	1.05091	1.94819	-1.58095
	20	9.76612	-1.03649	-1.66179	-0.0114403	-2.11723	0.0410995	0.00804138	-2.47131	-1.20478	-0.022625	0.411518	-3.10157	-0.0815277	-2.07386	-3.6298	-0.946373	-0.340881	-0.851402	-0.397312	0.472607	-0.287689	-2.4634		20	9.76612	0.45519	0.174057	1.70803	-1.18995	-0.655964	-0.415268	1.36807	-1.65	1.5919	0.643097	-0.562637	-1.80943	0.643517	0.18745	-0.711857	3.21414	1.58454	3.57561	0.885113	2.07175	-1.54838
	20	9.79684	-1.08671	-1.97408	0.208229	-2.18741	0.0548325	-0.0973167	-2.64228	-1.32973	-0.180649	0.176186	-3.29848	0.115891	-1.98209	-3.95971	-1.04786	-0.271591	-0.891781	-0.326595	0.535072	-0.205135	-2.42978		20	9.79684	0.505093	0.26685	1.60582	-0.915051	-0.576942	-0.0533371	1.45969	-1.62148	1.5783	0.719105	-0.467735	-1.79816	0.63324	0.281712	-0.547611	3.00772	1.61502	3.60265	0.777027	2.20184	-1.66679
	20	9.82756	-1.07353	-2.02775	0.0928116	-2.12092	-0.266796	-0.375858	-2.52045	-1.19147	0.0105171	0.11874	-3.39353	0.242958	-2.00208	-3.86245	-0.931641	-0.191513	-0.576092	-0.385284	0.722397	-0.356163	-2.45607		20	9.82756	0.466464	0.2117	1.45351	-0.83889	-0.668327	-0.358513	1.31361	-1.56966	1.7741	0.819527	-0.689857	-1.92437	0.439323	0.439999	-0.745831	3.11011	1.64577	3.61358	0.905533	2.0425	-1.64454
	20	9.85828	-1.06281	-1.96727	0.00492859	-2.3868	-0.05616	-0.251144	-2.30875	-1.14186	-0.102638	0.267799	-3.48403	0.291462	-1.96714	-3.8059	-0.93716	-0.189003	-0.600719	-0.333557	0.621704	-0.428524	-2.48151		20	9.85828	0.485112	0.0948792	1.30192	-0.812283	-0.877167	-0.478615	1.17161	-1.47266	1.97883	1.05677	-0.784805	-1.92774	0.56583	0.660786	-0.826473	3.18279	1.73833	3.60846	0.850658	2.33424	-1.66311
	20	9.889	-1.05891	-1.74332	0.241402	-2.31516	-0.0214005	-0.312344	-2.51573	-1.15044	0.0715027	0.0553932	-3.41685	0.365936	-1.95378	-3.9441	-1.20365	-0.331863	-0.637398	-0.369366	0.765503	-0.24662	-2.51587		20	9.889	0.464071	0.149586	1.63545	-0.591724	-0.602367	-0.568405	1.1674	-1.53037	1.60811	0.902248	-1.03949	-1.74812	0.591675	0.587509	-0.791237	3.36605	1.75196	3.54667	0.742764	1.88454	-1.78084
	20	9.91972	-1.04575	-1.72374	0.152462	-2.12292	-0.258595	-0.429302	-2.52373	-1.26222	0.946079	-0.125973	-3.34789	0.230618	-1.83198	-3.81272	-1.19246	-0.516708	-0.462105	-0.303921	0.717106	-0.368282	-2.6788		20	9.91972	0.500929	0.183472	1.24528	0.056633	-0.58717	-0.589218	1.13385	-1.40738	1.71167	0.964058	-0.881844	-1.77079	0.585724	0.666519	-0.661869	3.46405	1.4778	3.47513	0.779793	1.97873	-1.80586
	20	9.95044	-1.08994	-1.50957	0.243073	-2.1423	-0.259438	-0.556023	-2.2742	-0.931103	0.591328	0.0806656	-3.54235	0.0666008	-1.98816	-4.01565	-1.28071	-0.637012	-0.867641	-0.305843	0.58823	-0.3839	-2.67474		20	9.95044	0.43601	0.203659	1.25968	0.369034	-0.679008	-0.529064	1.04707	-1.54298	1.76638	0.841476	-1.1768	-1.99334	0.279022	0.519131	-0.863491	3.5773	1.49257	3.35175	0.959511	1.65306	-1.81475
	20	9.98116	-1.06712	-1.73404	0.184658	-2.03183	-0.110966	-0.825939	-2.31411	-0.989342	0.172436	-0.18018	-3.45643	0.208675	-1.8835	-3.95707	-1.42366	-0.403221	-0.301991	-0.150059	0.674809	-0.138939	-2.68163		20	9.98116	0.494307	0.269032	1.10079	0.371956	-0.468555	-0.427036	1.05052	-1.56078	2.0642	0.844799	-0.983852	-2.07201	0.573063	0.626999	-0.802338	3.34977	1.67583	3.32534	1.01903	1.74382	-1.81444
	20	10.0119	-1.09083	-1.7546	0.279133	-2.18073	-0.158863	-0.720425	-2.20173	-1.14713	0.397636	-0.354378	-3.41248	0.134705	-1.87735	-4.19265	-1.48274	-0.238331	-0.415779	-0.105404	0.448742	-0.205013	-2.62928		20	10.0119	0.491175	-0.0437241	1.21721	0.460575	-0.649231	-0.668221	1.28825	-1.48874	2.24041	0.47723	-1.03797	-1.98376	0.65657	0.873848	-0.713249	3.46427	1.53403	3.17442	1.14217	1.69979	-1.82038
	20	10.0426	-1.12653	-2.01518	0.0683022	-2.19777	-0.229889	-1.03268	-2.29133	-1.23956	0.132824	-0.298054	-3.66061	0.149879	-1.7977	-3.95848	-1.2837	-0.350967	-0.43634	-0.0969887	0.576405	-0.152054	-2.41665		20	10.0426	0.38931	0.052845	1.04348	0.657677	-0.733131	-0.669411	1.00346	-1.50226	2.13492	0.413502	-1.72451	-2.26878	0.854492	0.658413	-0.400372	3.30801	1.48176	3.18686	0.763325	1.52657	-2.00064
	20	10.0733	-1.15518	-2.03122	0.147907	-2.12109	0.0355453	-0.783737	-2.0243	-1.14915	0.394165	-0.560635	-3.82752	-0.264465	-1.87172	-4.00968	-1.34353	-0.246365	-0.708614	-0.353573	0.707462	-0.314926	-2.77824		20	10.0733	0.430808	0.0376587	1.05481	0.739845	-0.777534	-0.714378	1.10335	-1.49512	1.9581	0.346306	-1.2649	-2.1601	0.807617	0.468452	-0.267708	3.49919	1.68148	2.98119	1.10102	1.35871	-1.84182
	20	10.104	-1.13211	-1.70269	-0.160007	-1.97169	-0.145115	-0.911816	-2.33551	-1.35811	0.262955	-0.478321	-3.69243	-0.365715	-1.8443	-4.15495	-1.27842	-0.0837975	-0.446926	-0.126778	0.593983	0.0717163	-2.51428		20	10.104	0.376434	-0.169983	1.02184	0.873325	-0.935951	-0.689186	0.956055	-1.58857	2.0637	0.248077	-1.17297	-2.10081	0.876751	0.598366	-0.222202	3.50013	1.31522	2.85265	0.789959	1.19643	-1.88416
	20	10.1348	-1.10045	-1.42772	0.183468	-1.84907	-0.124722	-0.996632	-2.08704	-1.30573	0.624454	-0.490944	-3.90138	-0.210907	-1.57709	-4.29603	-1.45065	-0.114124	-0.547466	-0.0169373	0.458721	-0.182381	-2.69676		20	10.1348	0.358595	-0.473274	0.908054	0.879704	-1.11007	-0.802578	1.00403	-1.36165	2.04853	0.141788	-1.16236	-2.19132	0.898544	0.539165	-0.122425	3.45753	1.16988	2.90707	1.09527	1.16389	-1.8179
	20	10.1655	-1.09193	-1.64106	0.123806	-1.73449	-0.176529	-0.975044	-2.09184	-1.16103	0.843384	-0.43351	-3.93127	-0.267948	-1.65052	-4.26155	-1.18732	-0.03685	-0.521305	-0.120594	0.386623	-0.421261	-2.58035		20	10.1655	0.332046	-0.356579	0.753868	1.16509	-1.18506	-0.757278	1.03933	-1.50066	2.04869	0.0300751	-0.60294	-2.36634	1.10514	0.204967	-0.279114	3.59792	0.987991	2.83952	0.840672	1.13819	-2.06256
	20	10.1962	-1.0461	-1.401	0.21109	-1.51919	-0.115479	-1.09704	-1.73717	-1.21186	0.719193	-0.515182	-3.94305	-0.302757	-1.66651	-4.07045	-1.23185	-0.189476	-0.361015	-0.174625	0.477531	-0.451515	-2.34168		20	10.1962	0.333383	-0.53537	0.679054	1.07079	-0.979641	-1.08202	1.01964	-1.523	2.0164	-0.171505	-0.576084	-2.07998	1.39129	0.0646782	-0.242863	3.4811	1.12608	2.89099	0.954861	0.963581	-1.80035
[truncated: 4,231 more rows]

## Sheet: panel B
		Ipsilateral responses
[truncated: 7,825 more rows]
[truncated: 58 more columns]
