# Supplementary material for: Glycinergic axonal inhibition subserves acute spatial sensitivity to sudden increases in sound intensity
Source: eLife journal article supplement (doi:10.7554/elife.62183), 2021-06-14
Supplement: supp [file elife-62183-supp-v1.zip › elife_poa_e62183_Figure_3_source_data_1.xlsx]

## Sheet: panel A
	Top panel																																Bottom panel
	Post-stimulus time (ms)	Vm rel (mV)	Vm rel (mV)	Vm rel (mV)	Vm rel (mV)	Vm rel (mV)	Vm rel (mV)	Vm rel (mV)	Vm rel (mV)	Vm rel (mV)	Vm rel (mV)	Vm rel (mV)	Vm rel (mV)	Vm rel (mV)	Vm rel (mV)	Vm rel (mV)	Vm rel (mV)	Vm rel (mV)	Vm rel (mV)	Vm rel (mV)	Vm rel (mV)	Vm rel (mV)	Vm rel (mV)	Vm rel (mV)	Vm rel (mV)	Vm rel (mV)	Vm rel (mV)	Vm rel (mV)	Vm rel (mV)	Vm rel (mV)	Vm rel (mV)		Post-stimulus time (ms)	Vm rel (mV)	Vm rel (mV)	Vm rel (mV)	Vm rel (mV)	Vm rel (mV)	Vm rel (mV)	Vm rel (mV)	Vm rel (mV)	Vm rel (mV)	Vm rel (mV)	Vm rel (mV)	Vm rel (mV)	Vm rel (mV)	Vm rel (mV)	Vm rel (mV)	Vm rel (mV)
	3.0077	-0.713619	0.109295	-2.08822	-2.10179	-2.88293	0.300602	1.76765	-2.25775	0.719646	3.38834	2.21822	-1.41073	-0.195915	-0.931366	2.88747	-0.135048	-1.40553	-0.696381	-0.159714	-0.898941	0.139122	-2.13596	-1.13931	-0.0733337	-3.03009	-0.272423	-2.00382	1.19757	0.0716019	-1.94228		3.0077	0.230305	-0.301476	-1.43817	-0.933033	-0.724796	-0.0444374	-1.08704	-2.55789	0.576157	1.95411	-0.884312	-1.17997	-0.305397	2.85612	1.8123	0.802784
	3.01794	-0.663731	0.137657	-2.0042	-2.12055	-2.98876	0.162651	1.78498	-2.30907	0.686447	3.52108	1.99847	-1.49785	-0.137146	-0.939388	2.90282	-0.13797	-1.49282	-0.727436	-0.0567017	-0.731846	0.210541	-2.19253	-1.0763	0.0857277	-3.0141	-0.15485	-2.11694	1.16132	0.0138779	-1.9724		3.01794	0.195175	-0.366863	-1.39874	-0.958199	-0.780193	0.053112	-1.15333	-2.54383	0.546558	1.84701	-0.808067	-1.23374	-0.248878	3.00128	1.76609	0.63427
	3.02818	-0.639778	0.186195	-1.9046	-2.16685	-3.00764	0.0960274	1.77462	-2.20452	0.632431	3.70279	1.904	-1.57035	-0.0547714	-0.982006	2.88376	-0.140736	-1.52734	-0.732895	-0.0481796	-0.736176	0.320915	-2.03971	-1.12689	0.160889	-3.05746	-0.177238	-2.27619	1.1172	0.0682373	-1.9199		3.02818	0.320263	-0.413235	-1.37532	-0.929729	-0.871761	0.114735	-1.25679	-2.48312	0.505501	1.74086	-0.716442	-1.21505	-0.100166	3.07742	1.80512	0.512844
	3.03842	-0.518677	0.204033	-1.94195	-2.17973	-2.97255	0.0518265	1.89515	-2.09883	0.66375	3.85266	1.80604	-1.62084	-0.0268898	-1.05177	2.86926	-0.179668	-1.58889	-0.57531	-0.0525665	-0.694866	0.369434	-1.89762	-1.19958	0.192513	-3.10587	-0.0618439	-2.30958	1.10821	0.0494385	-1.90821		3.03842	0.245625	-0.562115	-1.24421	-0.849728	-0.929638	0.166233	-1.32367	-2.54879	0.563938	1.73003	-0.729458	-1.27329	-0.139622	3.22612	1.78786	0.473209
	3.04866	-0.403782	0.333374	-1.94072	-2.25038	-2.85896	0.01717	1.97638	-2.13365	0.582008	4.06301	1.73394	-1.44952	-0.0320053	-1.11015	2.77844	-0.262199	-1.53492	-0.5457	-0.0352097	-0.751526	0.291851	-1.8596	-1.23851	0.195435	-3.03954	0.0251465	-2.39371	1.11357	0.0571671	-1.94372		3.04866	0.189381	-0.75478	-1.15789	-0.757843	-0.97237	0.244625	-1.29181	-2.61055	0.667316	1.65247	-0.744144	-1.33245	-0.234303	3.33924	1.78589	0.346989
	3.0589	-0.354332	0.441841	-1.92042	-2.22873	-2.67881	-0.0909996	1.97668	-2.09711	0.50861	4.2179	1.57256	-1.5405	-0.174019	-1.16781	2.80247	-0.376053	-1.56409	-0.528198	-0.00686264	-0.693542	0.258308	-1.85109	-1.09995	0.282948	-3.06278	0.121178	-2.41371	1.18778	0.124222	-2.08312		3.0589	0.233837	-0.961845	-0.981327	-0.831944	-0.933235	0.350124	-1.13296	-2.64056	0.700409	1.59467	-0.605839	-1.52066	-0.16412	3.43066	1.86816	0.288147
	3.06914	-0.39135	0.558678	-1.73045	-2.19995	-2.7525	-0.0199509	1.93964	-2.15488	0.511421	4.30886	1.42313	-1.57789	-0.206146	-1.15675	2.73148	-0.488029	-1.65209	-0.500351	-0.0621758	-0.561554	0.221722	-1.75781	-1.03355	0.416031	-2.99821	0.177959	-2.50249	1.09481	0.296288	-2.15014		3.06914	0.314743	-1.09066	-0.806576	-0.810917	-0.895077	0.573189	-1.16706	-2.63591	0.724953	1.6462	-0.525017	-1.65586	-0.184315	3.50844	1.94406	0.193134
	3.07938	-0.320896	0.665527	-1.63607	-2.12087	-2.87519	-0.0195923	1.9474	-2.00565	0.657753	4.45949	1.35094	-1.60442	-0.157162	-1.13797	2.6683	-0.517708	-1.69427	-0.425072	-0.0552254	-0.386139	0.220016	-1.75067	-0.925335	0.533165	-3.02993	0.214546	-2.47359	1.08508	0.223663	-2.2063		3.07938	0.407024	-1.18415	-0.706978	-0.826771	-0.877518	0.737614	-1.24375	-2.62661	0.751667	1.67975	-0.472157	-1.70173	-0.20779	3.56569	2.05342	0.0928001
	3.08962	-0.240669	0.721436	-1.61258	-2.10077	-2.95474	0.00537872	1.91139	-1.81403	0.626236	4.39053	1.18155	-1.63327	-0.0699387	-1.13122	2.70245	-0.450512	-1.60749	-0.264523	-0.10273	-0.244843	0.379791	-1.71296	-0.762627	0.649216	-2.99507	0.322323	-2.49358	0.989586	0.281479	-2.09075		3.08962	0.485912	-1.22191	-0.447815	-0.776833	-0.820286	0.90316	-1.18454	-2.6947	0.826176	1.57544	-0.509315	-1.75414	-0.203556	3.61203	2.05574	-0.0251579
	3.09986	-0.13282	0.740604	-1.67667	-2.05619	-2.96864	-0.1731	1.91192	-1.61411	0.644329	4.41995	1.16662	-1.70005	-0.128765	-1.06425	2.61024	-0.444599	-1.64497	-0.22226	-0.0716896	-0.18446	0.43103	-1.701	-0.726398	0.745323	-3.03453	0.353924	-2.46957	0.854355	0.316399	-2.08252		3.09986	0.514297	-1.28453	-0.344604	-0.760548	-0.712627	1.09125	-1.12659	-2.68261	0.740917	1.42215	-0.349194	-1.91218	-0.220661	3.79215	2.16571	-0.0112572
	3.1101	0.0421677	0.788906	-1.49135	-1.98526	-2.91615	-0.256512	1.87833	-1.57165	0.592045	4.61659	1.09063	-1.66698	-0.244232	-1.00402	2.63379	-0.366646	-1.6108	-0.245461	-0.0672073	-0.12841	0.426308	-1.69539	-0.77681	0.846199	-3.03217	0.433903	-2.46734	0.737755	0.322132	-2.05383		3.1101	0.375362	-1.28444	0.0556068	-0.7729	-0.620548	1.1337	-1.0995	-2.69923	0.678093	1.33975	-0.258808	-1.93693	-0.26564	3.84188	2.2303	-0.096981
	3.12034	0.1236	0.912323	-1.4268	-1.88461	-2.93571	-0.211105	1.8577	-1.50116	0.584106	4.82487	1.13961	-1.73329	-0.147278	-1.03218	2.63894	-0.276001	-1.58201	-0.328621	0.0571175	-0.0773506	0.359299	-1.62691	-0.827904	0.794678	-2.97174	0.518875	-2.41919	0.665596	0.327843	-2.12124		3.12034	0.38586	-1.44196	0.670105	-0.809975	-0.591175	1.15066	-1.16132	-2.78174	0.708038	1.20577	-0.25267	-1.84935	-0.25671	3.83798	2.23406	-0.301605
	3.13058	0.271301	0.935642	-1.29455	-1.9123	-2.88984	-0.256653	1.86552	-1.37737	0.540749	4.90269	1.07403	-1.71346	-0.240013	-0.969063	2.75278	-0.220543	-1.58825	-0.268074	0.0689774	0.0310097	0.335243	-1.45485	-0.891609	0.84037	-2.96758	0.528721	-2.42545	0.612396	0.400249	-2.25534		3.13058	0.301167	-1.41359	0.850254	-0.885326	-0.564796	1.11187	-1.23622	-2.80484	0.690727	1.14482	-0.308712	-1.78105	-0.304859	3.83714	2.2461	-0.374584
	3.14082	0.434021	1.00574	-1.2173	-1.92364	-2.86926	-0.254684	1.99467	-1.16696	0.555328	4.9529	1.1041	-1.64399	-0.327164	-0.918598	2.77714	-0.280067	-1.71873	-0.311764	0.0884933	0.199944	0.269562	-1.50756	-0.860924	0.854187	-2.97317	0.52343	-2.49522	0.484413	0.353912	-2.32299		3.14082	0.27972	-1.47838	0.967567	-0.898392	-0.594906	1.16367	-1.27528	-2.82175	0.711472	1.03392	-0.319462	-1.80069	-0.357227	3.97473	2.26085	-0.368015
	3.15106	0.50452	1.0454	-1.17701	-1.8316	-2.77696	-0.361023	2.11742	-0.972946	0.479321	4.99524	1.03254	-1.60941	-0.365028	-0.982876	2.76598	-0.404736	-1.90919	-0.388798	0.13266	0.299698	0.284557	-1.41386	-0.898571	0.79755	-2.95858	0.530617	-2.54113	0.469879	0.338821	-2.41837		3.15106	0.323456	-1.64711	1.05588	-0.795788	-0.607353	1.17684	-1.28865	-2.90569	0.7253	1.00624	-0.353928	-1.84638	-0.335854	4.10696	2.31038	-0.531765
	3.1613	0.573021	1.1018	-1.15644	-1.7974	-2.69535	-0.509926	2.16964	-0.750061	0.314503	4.9922	0.87542	-1.58243	-0.365982	-1.07304	2.86154	-0.456615	-2.06772	-0.391037	0.28389	0.37059	0.371746	-1.34798	-1.03601	0.759914	-2.903	0.562538	-2.45792	0.408615	0.408798	-2.4338		3.1613	0.277943	-1.73041	1.35214	-0.707119	-0.55434	1.33137	-1.26452	-2.97635	0.713879	0.983471	-0.326855	-1.89424	-0.278469	4.07651	2.28328	-0.569424
	3.17154	0.746742	1.10394	-1.1495	-1.65918	-2.7299	-0.621719	2.31837	-0.574226	0.173225	5.09146	0.762131	-1.62314	-0.42804	-1.15012	2.83932	-0.49984	-2.03957	-0.293621	0.204746	0.377003	0.33075	-1.1911	-1.17682	0.682465	-2.83936	0.620678	-2.46793	0.398174	0.397411	-2.43207		3.17154	0.247875	-1.91324	1.54204	-0.630028	-0.500542	1.38647	-1.24615	-3.04953	0.690945	0.935848	-0.395126	-2.02388	-0.318913	4.05366	2.23009	-0.672337
	3.18178	0.775078	1.22309	-1.0705	-1.48794	-2.69832	-0.716778	2.35495	-0.352997	0.0462456	5.08287	0.626781	-1.6153	-0.50182	-1.13563	2.83492	-0.529392	-1.95824	-0.232765	0.143902	0.444321	0.308182	-1.04086	-1.2229	0.647499	-2.8966	0.660519	-2.51012	0.223248	0.437359	-2.47911		3.18178	0.152473	-1.98056	1.7376	-0.639088	-0.496513	1.45359	-1.16674	-3.05571	0.642723	0.856884	-0.311893	-2.17125	-0.27668	4.16879	2.14399	-0.673717
	3.19202	0.786224	1.2795	-0.947853	-1.35293	-2.63186	-0.823696	2.39828	-0.106941	0.0401421	5.03575	0.68087	-1.56564	-0.535995	-1.11619	2.74121	-0.523193	-1.9753	-0.262947	0.0931053	0.614265	0.188663	-0.975655	-1.25271	0.627068	-2.96987	0.688507	-2.47276	0.0917473	0.43309	-2.52759		3.19202	0.135845	-2.07568	2.06797	-0.660595	-0.499447	1.5438	-1.20108	-3.01394	0.608486	0.839298	-0.306232	-2.16925	-0.226025	4.24825	2.14419	-0.699619
	3.20226	0.961365	1.31792	-0.839146	-1.18163	-2.58618	-0.911018	2.45079	-0.0105362	0.0158348	4.96116	0.72401	-1.45462	-0.546677	-1.12172	2.64574	-0.580032	-1.99874	-0.299698	-0.0124435	0.696449	0.178665	-0.961109	-1.21891	0.6231	-3.0472	0.646713	-2.4273	-0.125847	0.368778	-2.51791		3.20226	0.1311	-2.17361	2.37225	-0.670357	-0.501759	1.60344	-1.21204	-3.00233	0.624508	0.825222	-0.240547	-2.18678	-0.167187	4.27536	2.13172	-0.646931
	3.2125	1.15779	1.24339	-0.729103	-0.985367	-2.43268	-1.00085	2.54908	0.182869	0.0219879	4.99171	0.705971	-1.53551	-0.46452	-1.17732	2.62672	-0.573071	-2.0356	-0.35244	-0.055954	0.759926	0.100712	-0.732368	-1.22174	0.5942	-3.10863	0.554123	-2.41111	-0.176567	0.325539	-2.65147		3.2125	0.0465698	-2.21066	2.63756	-0.654011	-0.430553	1.72068	-1.2125	-2.92628	0.575489	0.821728	-0.175861	-2.18082	-0.200336	4.34038	2.0914	-0.70731
	3.22274	1.3512	1.26814	-0.620789	-0.796421	-2.36465	-1.07264	2.62869	0.246506	0.0864182	4.96377	0.506439	-1.46809	-0.440842	-1.14223	2.6385	-0.648354	-2.06849	-0.34967	-0.127464	0.739399	0.071804	-0.748619	-1.23985	0.716835	-3.20758	0.477654	-2.30399	-0.272377	0.36618	-2.76174		3.22274	-0.0188293	-2.2552	2.93447	-0.587601	-0.433571	1.8006	-1.20022	-2.90189	0.576023	0.70961	-0.225132	-2.26441	-0.304409	4.22683	2.06209	-0.773293
	3.23298	1.44637	1.21311	-0.610073	-0.685722	-2.41167	-1.03848	2.75159	0.452393	0.0335503	4.93578	0.482479	-1.48988	-0.533077	-1.13651	2.65674	-0.669106	-2.06201	-0.373539	-0.0758133	0.716106	0.0483932	-0.674709	-1.16241	0.767273	-3.23705	0.376503	-2.31552	-0.316319	0.341492	-2.80361		3.23298	0.037056	-2.29157	3.26139	-0.457245	-0.393456	1.78971	-1.10698	-2.97865	0.455662	0.560528	-0.251858	-2.29294	-0.305527	4.11453	2.08399	-0.863476
	3.24322	1.68735	1.26175	-0.503704	-0.563416	-2.37417	-1.07876	2.923	0.698963	-0.0888062	4.85702	0.487247	-1.49761	-0.584206	-1.15306	2.68038	-0.722584	-2.20753	-0.375088	0.0288162	0.761833	-0.0314789	-0.587784	-1.17436	0.809124	-3.21745	0.365547	-2.27148	-0.438305	0.352051	-2.78596		3.24322	0.0105209	-2.42384	3.53585	-0.375851	-0.399502	1.82226	-1.18419	-2.99948	0.388187	0.661404	-0.137192	-2.39656	-0.326591	4.18828	1.96258	-0.987953
	3.25346	1.78837	1.29246	-0.469444	-0.409348	-2.26979	-1.15141	3.10077	0.918129	-0.123318	4.79219	0.585594	-1.62988	-0.666374	-1.13615	2.75618	-0.666878	-2.41264	-0.374268	0.142921	0.746944	-0.114853	-0.462585	-1.21469	0.794689	-3.21347	0.408424	-2.20549	-0.618622	0.356892	-2.77519		3.25346	-0.0179939	-2.56893	3.78537	-0.317162	-0.416477	1.82272	-1.12764	-3.00229	0.303654	0.63744	-0.0909767	-2.45282	-0.300045	4.24908	1.89647	-1.12589
	3.2637	1.91603	1.36102	-0.414986	-0.14151	-2.20047	-1.21624	3.25779	1.0813	-0.247211	4.76625	0.534752	-1.72314	-0.884613	-1.21786	2.76471	-0.573238	-2.41479	-0.482124	0.0632553	0.520245	-0.219257	-0.406693	-1.24133	0.768608	-3.11299	0.404659	-2.2683	-0.771866	0.372295	-2.71954		3.2637	-0.0677528	-2.59221	3.9816	-0.239223	-0.474377	1.86809	-1.05739	-2.99905	0.291912	0.505013	-0.174553	-2.52164	-0.208241	4.18599	1.907	-1.12038
	3.27394	1.92741	1.40274	-0.399288	0.151031	-2.15143	-1.17635	3.47662	1.19057	-0.34972	4.56139	0.424747	-1.64841	-0.953804	-1.15606	2.84126	-0.606628	-2.40354	-0.65255	-0.0980835	0.475647	-0.200733	-0.404472	-1.28498	0.668827	-3.07009	0.396469	-2.1804	-0.882133	0.310139	-2.62792		3.27394	0.002285	-2.6855	4.21098	-0.247902	-0.396591	1.93727	-0.82645	-3.02781	0.294834	0.467808	-0.116833	-2.47461	-0.0826912	4.15267	1.84413	-1.03517
	3.28418	2.0949	1.44386	-0.45932	0.348118	-2.15703	-1.21411	3.6884	1.3525	-0.51474	4.43111	0.420815	-1.60706	-1.13615	-1.16471	2.96716	-0.768288	-2.41508	-0.604294	-0.172241	0.529449	-0.200745	-0.238281	-1.35326	0.728561	-2.97929	0.305527	-2.2147	-0.910423	0.304955	-2.6004		3.28418	-0.0951576	-2.67348	4.6395	-0.27953	-0.272423	1.99488	-0.634735	-3.05607	0.361485	0.34705	-0.105289	-2.52179	-0.124508	4.16402	1.70854	-1.11801
	3.29442	2.2672	1.54914	-0.446041	0.59798	-2.14982	-1.31449	3.92601	1.56618	-0.555775	4.22824	0.376358	-1.52442	-1.30029	-1.15472	3.15426	-0.788876	-2.5311	-0.603077	-0.245018	0.454037	-0.181171	-0.0562515	-1.2928	0.717117	-3.01192	0.394028	-2.23746	-0.878761	0.267891	-2.59877		3.29442	-0.248295	-2.80942	5.0883	-0.265392	-0.268345	2.04593	-0.590321	-3.14507	0.440948	0.274128	-0.0885048	-2.59888	-0.179787	4.2037	1.58935	-1.26937
	3.30466	2.32008	1.48108	-0.343964	0.770679	-2.17982	-1.33011	4.2327	1.64278	-0.587555	4.13928	0.307194	-1.47657	-1.39653	-1.16471	3.19903	-0.763306	-2.42853	-0.619896	-0.192986	0.470428	-0.398991	0.0666656	-1.29509	0.650433	-2.9053	0.427525	-2.12842	-0.92028	0.208229	-2.57661		3.30466	-0.239544	-2.85889	5.45519	-0.180023	-0.263485	2.19999	-0.648563	-3.06515	0.44989	0.249287	-0.139374	-2.71459	-0.0904045	4.12337	1.4309	-1.28743
	3.3149	2.32381	1.45198	-0.295303	0.95916	-2.17199	-1.43659	4.55016	1.73513	-0.537247	4.14157	0.131935	-1.44101	-1.43331	-1.15519	3.21882	-0.850079	-2.4402	-0.64846	-0.173161	0.467827	-0.554214	0.178864	-1.3864	0.663307	-2.92173	0.431435	-2.1171	-0.978859	0.108284	-2.49912		3.3149	-0.259048	-2.85185	5.85809	-0.0886383	-0.194614	2.39411	-0.686378	-3.05217	0.496132	0.190372	-0.154194	-2.69199	0.0829735	3.99857	1.41608	-1.35843
	3.32514	2.36733	1.54211	-0.263855	1.19558	-2.17769	-1.49628	4.91381	1.87761	-0.531624	3.91072	0.0870743	-1.34471	-1.37632	-1.14019	3.22292	-0.929947	-2.36604	-0.62426	-0.137123	0.493851	-0.728081	0.23592	-1.58143	0.632729	-2.8943	0.528206	-2.02428	-1.15741	-0.0284042	-2.56013		3.32514	-0.248417	-2.87833	6.2635	-0.01437	-0.168186	2.63743	-0.681957	-3.06696	0.667709	-0.0568581	-0.133793	-2.5868	0.170105	4.06315	1.43444	-1.458
	3.33538	2.45057	1.67488	-0.257	1.39678	-2.12209	-1.5372	5.09464	2.0155	-0.684029	3.7477	0.0979843	-1.25988	-1.43212	-1.0182	3.29924	-0.979588	-2.34142	-0.712341	-0.20903	0.499264	-0.761757	0.311199	-1.7366	0.51376	-2.89844	0.503685	-2.14806	-1.24691	0.0168457	-2.51783		3.33538	-0.29884	-2.9804	6.64883	0.0156441	-0.0574989	2.72767	-0.667362	-2.94175	0.692944	-0.178486	-0.043087	-2.60808	0.155979	4.07684	1.36911	-1.58194
	3.34562	2.59119	1.64743	-0.237045	1.4545	-1.49858	-1.42594	5.23949	2.21809	-0.732765	3.5741	0.145618	-1.32724	-1.39978	-1.0684	3.31635	-1.00503	-2.38238	-0.742874	-0.185867	0.49316	-0.799423	0.472969	-1.8165	0.471024	-2.88876	0.43507	-2.09474	-1.22729	0.0952644	-2.57438		3.34562	-0.298603	-2.86643	7.02103	0.00850296	0.0275688	2.71941	-0.657612	-2.74009	0.828819	-0.286728	-0.0324211	-2.63626	0.141018	3.99513	1.25716	-1.56583
	3.35586	2.69293	1.54544	-0.272614	1.55523	-1.32062	-1.32774	5.52034	2.37061	-0.8092	3.45364	0.22084	-1.30132	-1.62497	-1.06298	3.32945	-1.03146	-2.41666	-0.734898	-0.129684	0.480846	-0.896175	0.447647	-1.85692	0.380138	-2.88553	0.420898	-2.11484	-1.21011	0.141457	-2.57647		3.35586	-0.374168	-2.78556	7.24643	0.0903435	0.177734	2.80872	-0.582775	-2.58743	0.811298	-0.319523	-0.0100327	-2.6109	0.126476	3.90593	1.20727	-1.60331
	3.3661	2.96312	1.62993	-0.255211	1.85228	-1.50995	-1.37467	5.72877	2.41949	-0.902206	3.31351	0.153702	-1.24111	-1.81875	-1.12291	3.30791	-1.14258	-2.47216	-0.667091	-0.132092	0.536076	-1.02053	0.609234	-1.93185	0.376549	-2.91768	0.442413	-2.03695	-1.14542	0.050705	-2.56838		3.3661	-0.409702	-2.79411	7.45303	0.0279503	0.204472	2.90477	-0.515636	-2.52485	0.748737	-0.310787	-0.0329323	-2.51848	0.0152054	3.87781	1.17699	-1.6382
	3.37634	3.08602	1.51971	-0.224159	2.02582	-1.65544	-1.47084	5.88614	2.64205	-0.990555	3.23276	0.149338	-1.19128	-1.97601	-1.08587	3.51519	-1.17533	-2.4829	-0.657234	-0.0393715	0.466995	-1.16067	0.731415	-1.88871	0.323242	-2.90321	0.390224	-1.96487	-1.11842	0.167576	-2.56311		3.37634	-0.42313	-2.78875	7.65218	0.191528	0.33242	3.01853	-0.382179	-2.42474	0.85004	-0.267117	-0.0101967	-2.43414	0.00624084	3.86532	1.01549	-1.73561
	3.38658	3.16823	1.4997	-0.232693	2.20628	-1.74497	-1.51021	6.18861	2.80495	-0.944183	3.14036	0.0415268	-1.15087	-2.02621	-1.09906	3.73841	-1.1875	-2.42519	-0.623817	0.00182724	0.244263	-1.35038	0.88356	-1.93355	0.405529	-2.91725	0.449425	-1.91425	-1.02491	0.177055	-2.52347		3.38658	-0.486881	-2.8073	7.85376	0.306576	0.400036	3.14472	-0.470882	-2.29749	0.943226	-0.22369	-0.132732	-2.46962	0.0304642	3.80636	0.90366	-1.78574
	3.39682	3.25262	1.57022	-0.16819	2.37165	-1.80039	-1.33575	6.31161	2.80314	-0.93927	3.04091	0.0413208	-1.16993	-2.07126	-1.06766	3.833	-1.27062	-2.30478	-0.621113	0.0600014	0.0293045	-1.3256	1.03301	-2.00246	0.334148	-2.92568	0.331608	-1.9577	-1.02684	0.146355	-2.466		3.39682	-0.617115	-2.92881	8.1042	0.549908	0.489014	3.3536	-0.527508	-2.14414	0.937077	-0.280384	-0.175518	-2.36412	0.0515747	3.75206	0.862652	-1.87868
	3.40706	3.3276	1.68272	-0.222763	2.47403	-1.89999	-1.11517	6.43307	2.90466	-0.942776	2.9045	0.101654	-1.15192	-2.08178	-0.937111	3.85659	-1.29686	-2.34477	-0.723286	0.136833	-0.0990715	-1.36903	1.00561	-1.99518	0.218765	-2.96375	0.3097	-2.06815	-1.15042	0.127628	-2.46714		3.40706	-0.690731	-3.15191	8.41346	0.500492	0.551277	3.45247	-0.52441	-2.02768	0.97961	-0.292591	-0.274139	-2.36515	-0.0411453	3.81108	0.781422	-2.01698
	3.4173	3.40485	1.76757	-0.181442	2.49243	-1.93498	-1.07363	6.53621	3.01001	-0.954647	2.66122	0.110809	-1.19836	-2.24198	-0.843975	3.90711	-1.47812	-2.40541	-0.792	0.168266	-0.0592308	-1.30215	0.961548	-2.05317	0.171844	-3.0323	0.215034	-2.02909	-1.30257	0.083107	-2.535		3.4173	-0.779968	-3.32222	8.76183	0.507004	0.654964	3.61221	-0.616951	-1.96569	0.979954	-0.283115	-0.262852	-2.33527	-0.0821037	3.80155	0.603085	-2.07316
	3.42754	3.45815	1.71939	-0.188499	2.5317	-1.92698	-1.06604	6.67454	3.04662	-1.00942	2.54557	0.0988274	-1.07354	-2.23279	-0.866146	3.94209	-1.50033	-2.37949	-0.930424	0.127357	0.00791931	-1.3586	1.0388	-2.08865	0.12534	-3.00954	0.18013	-1.94809	-1.28262	0.113312	-2.59456		3.42754	-0.913128	-3.29268	9.20115	0.473743	0.737743	3.66375	-0.570148	-1.80927	1.11125	-0.245922	-0.087719	-2.37119	-0.042614	3.86618	0.548882	-1.99028
	3.43778	3.46054	1.76485	-0.148556	2.70266	-1.83379	-1.02893	6.86698	3.15577	-1.04951	2.30212	0.0350037	-0.927372	-2.24361	-0.765965	3.89571	-1.53413	-2.26229	-0.885971	0.0828552	0.0978508	-1.38528	1.03144	-2.26775	0.0890198	-2.9855	-0.0207024	-1.95383	-1.27602	0.205498	-2.60091		3.43778	-0.917847	-3.26361	9.55258	0.399178	0.827663	3.72114	-0.63073	-1.63556	1.25335	-0.376945	0.0832253	-2.38697	0.02845	3.88342	0.392536	-2.01229
	3.44802	3.46666	1.84517	-0.031456	2.78752	-1.87473	-0.858253	7.01124	3.16286	-1.12462	2.13427	-0.0187607	-0.862286	-2.33066	-0.696274	3.82061	-1.51892	-2.17886	-0.937424	0.0712433	0.104717	-1.39277	1.02144	-2.24437	0.0886726	-3.00241	-0.122234	-2.01219	-1.29671	0.272648	-2.60034		3.44802	-0.906616	-3.15725	9.94472	0.412994	0.906342	3.71085	-0.605053	-1.41246	1.29667	-0.305611	0.232761	-2.32138	-0.104328	3.85966	0.175076	-1.952
	3.45826	3.54562	1.80988	0.000564575	2.71359	-1.92458	-0.862534	7.03509	3.14656	-1.1658	1.92982	-0.0901184	-0.75856	-2.30799	-0.610588	3.8152	-1.61732	-1.99518	-0.912735	0.0184555	0.0633621	-1.43407	1.02784	-2.21715	0.0304031	-3.01605	-0.169975	-1.95581	-1.24658	0.241581	-2.51508		3.45826	-1.01878	-3.17957	10.3525	0.417	0.958057	3.74637	-0.579136	-1.37567	1.43887	-0.319153	0.315769	-2.32141	-0.120956	3.693	-0.00949478	-1.99282
	3.4685	3.45916	1.84877	-0.0953865	2.72334	-1.89316	-0.792824	7.10733	3.14827	-1.2521	1.78699	-0.0072937	-0.656994	-2.31171	-0.590618	3.83051	-1.73832	-2.01057	-0.78978	0.0697899	-0.0289307	-1.40736	1.00596	-2.15054	0.0158844	-3.03449	-0.0346527	-1.90967	-1.22915	0.277691	-2.54396		3.4685	-0.950104	-3.07533	10.7881	0.466377	1.02839	3.77226	-0.588078	-1.40915	1.50297	-0.509624	0.330654	-2.43813	-0.107235	3.50123	-0.107925	-1.94702
	3.47874	3.56775	1.83648	-0.0920143	2.8287	-1.92475	-0.698349	7.38116	3.12902	-1.3186	1.64431	-0.0921211	-0.640079	-2.43613	-0.580521	3.81153	-1.80777	-2.004	-0.711807	0.152473	-0.0333176	-1.45647	1.00826	-2.13725	0.164474	-3.04311	0.0419159	-1.8708	-1.11389	0.189987	-2.57612		3.47874	-0.845997	-3.01899	11.2304	0.543434	1.12544	3.78739	-0.708111	-1.20018	1.49511	-0.704544	0.414974	-2.62919	-0.0808754	3.46165	-0.0588837	-2.02084
	3.48898	3.57887	1.78624	-0.0759315	2.88223	-1.82551	-0.814636	7.57874	3.13961	-1.41426	1.52258	-0.136238	-0.573166	-2.50355	-0.537392	3.77893	-1.81733	-2.01156	-0.543304	0.220802	-0.0550117	-1.38588	1.13993	-2.24951	0.184372	-3.01629	0.115517	-1.84977	-1.14307	0.214973	-2.49174		3.48898	-0.808605	-2.9776	11.7968	0.560921	1.36234	3.84255	-0.768501	-0.985508	1.48577	-0.77972	0.399487	-2.62396	-0.16151	3.5295	-0.128777	-2.01449
	3.49922	3.64756	1.8846	-0.00820923	2.97005	-1.77884	-0.821777	7.78238	3.17291	-1.40189	1.47221	-0.155933	-0.593681	-2.61066	-0.426613	3.7834	-1.83923	-2.02781	-0.557358	0.275772	-0.0922546	-1.42657	1.21818	-2.31281	0.0931778	-2.93584	0.011734	-1.94086	-1.12612	0.218098	-2.48999		3.49922	-0.956123	-2.90912	12.3774	0.626976	1.41551	3.84886	-0.693424	-0.708775	1.55843	-0.918766	0.315769	-2.65896	-0.261791	3.64709	-0.18037	-1.98377
	3.50946	3.71306	1.89291	-0.0408859	3.06501	-1.80173	-0.784702	7.88813	3.2392	-1.50203	1.3658	-0.0467491	-0.485939	-2.71741	-0.243233	3.70288	-1.93866	-2.00644	-0.449989	0.378433	-0.0868645	-1.3225	1.24276	-2.33492	0.0277939	-2.90055	-0.153313	-1.85064	-0.979195	0.295059	-2.44944		3.50946	-1.0827	-2.73043	12.8523	0.591091	1.43795	3.86513	-0.5215	-0.543816	1.59839	-1.04018	0.409428	-2.68592	-0.358253	3.56873	-0.379723	-2.06176
	3.5197	3.67399	1.9009	-0.0720215	3.05094	-1.84645	-0.637505	7.85561	3.30497	-1.42907	1.29865	-0.000663757	-0.421471	-2.78996	-0.224442	3.70553	-1.96658	-1.91102	-0.481949	0.408844	-0.101086	-1.26055	1.31958	-2.37928	0.0425873	-2.91323	-0.124714	-2.17439	-0.941711	0.460068	-2.44885		3.5197	-1.1394	-2.68987	13.3735	0.496212	1.52448	3.70951	-0.519497	-0.354473	1.73871	-1.11584	0.526051	-2.7893	-0.347633	3.54076	-0.416023	-2.15535
	3.52994	3.53121	1.83005	-0.108658	3.07413	-1.80328	-0.452553	7.84024	3.33587	-1.36603	1.20387	-0.0445938	-0.441978	-2.77415	-0.267082	3.64356	-1.98795	-1.91818	-0.514465	0.498859	-0.165543	-1.13421	1.26286	-2.49997	0.0066452	-2.85922	-0.101562	-2.5549	-0.790176	0.492599	-2.3597		3.52994	-1.11296	-2.66893	13.9651	0.406975	1.80492	3.66052	-0.607006	-0.153454	1.79464	-1.14564	0.612778	-2.66835	-0.471516	3.60007	-0.459393	-2.19305
	3.54018	3.41667	1.8885	-0.0911903	2.983	-1.74654	-0.435394	7.86246	3.30716	-1.34133	0.983826	-0.0531883	-0.540993	-2.79337	-0.353333	3.61419	-2.06657	-1.88928	-0.58392	0.469345	-0.11525	-1.19894	1.25138	-2.55353	0.0247269	-2.83743	-0.0317993	-2.49639	-0.727318	0.449066	-2.4237		3.54018	-0.916248	-2.58051	14.4734	0.40844	2.05167	3.71017	-0.754028	0.0254211	2.03503	-1.10338	0.84198	-2.68135	-0.633831	3.61454	-0.634689	-2.20632
	3.55042	3.33498	1.91391	-0.0544128	2.86123	-1.75389	-0.374184	7.72219	3.17576	-1.34283	0.842407	-0.0685883	-0.528763	-2.74453	-0.40662	3.50127	-2.24117	-1.85297	-0.547607	0.506859	-0.192329	-1.2743	1.27026	-2.62718	0.0501556	-2.83395	-0.0765381	-2.4119	-0.707062	0.528755	-2.38892		3.55042	-0.73629	-2.39865	14.9814	0.484066	2.27784	3.77389	-0.806946	0.255375	2.20095	-1.03821	1.01696	-2.77065	-0.759129	3.50292	-0.821201	-2.1287
	3.56066	3.27956	1.8443	-0.0555954	2.76355	-1.58505	-0.247131	7.64794	3.15582	-1.41952	0.613251	-0.15852	-0.392815	-2.71273	-0.27314	3.42678	-2.24336	-1.72247	-0.524376	0.596802	-0.24044	-1.21503	1.20623	-2.70121	-0.00527954	-2.9096	-0.0719757	-2.20857	-0.650734	0.584438	-2.38519		3.56066	-0.654667	-2.24937	15.4905	0.47477	2.45003	3.85829	-0.776917	0.533298	2.19528	-1.03683	1.17541	-2.78328	-0.709503	3.25078	-0.911301	-1.95944
	3.5709	3.20629	1.75847	-0.00463104	2.69802	-1.58247	-0.102554	7.65026	3.12391	-1.42513	0.496162	-0.178692	-0.45348	-2.84701	-0.277981	3.30394	-2.22771	-1.58977	-0.645264	0.752487	-0.296661	-1.16474	1.04829	-2.77246	0.010437	-2.89508	-0.0689087	-2.02572	-0.712868	0.627388	-2.3568		3.5709	-0.668125	-2.19926	15.8519	0.530273	2.64072	3.81897	-0.735767	0.686295	2.22023	-1.08521	1.32977	-2.68196	-0.727219	3.22694	-0.87487	-1.79951
	3.58114	3.12062	1.61256	0.0458145	2.67506	-1.47858	-0.134048	7.79364	3.12015	-1.47573	0.433567	-0.222046	-0.559528	-2.90361	-0.247902	3.21262	-2.24533	-1.52192	-0.701721	0.745754	-0.387283	-1.12221	0.954929	-2.71909	-0.0791397	-2.85318	-0.107918	-1.95225	-0.643429	0.658195	-2.38735		3.58114	-0.579876	-2.04903	16.1094	0.597721	2.68509	3.64017	-0.792068	0.805279	2.25074	-1.24312	1.52288	-2.64594	-0.849026	3.08465	-0.852795	-1.76799
	3.59138	3.18481	1.29904	0.0966568	2.64235	-1.41369	-0.194714	7.8754	3.03473	-1.5347	0.402596	-0.192101	-0.671574	-2.85124	-0.198036	3.25663	-2.21886	-1.57271	-0.601299	0.701073	-0.415989	-1.16951	0.795105	-2.61865	-0.191387	-2.81697	-0.130089	-1.94394	-0.579628	0.751701	-2.40342		3.59138	-0.456017	-1.89403	16.3529	0.731926	2.65663	3.51004	-0.836353	1.13992	2.20503	-1.23195	1.60567	-2.67827	-0.867039	3.04858	-0.832371	-1.68972
	3.60162	3.25893	1.15482	0.0921631	2.65476	-1.37403	-0.231621	7.84258	2.9786	-1.65704	0.278419	-0.284	-0.775475	-2.97124	-0.0833817	3.20319	-2.15478	-1.54095	-0.512367	0.722733	-0.485607	-1.16534	0.73679	-2.60297	-0.313301	-2.91663	-0.200733	-1.7665	-0.561806	0.788765	-2.24311		3.60162	-0.298458	-1.74598	16.5898	0.729031	2.62185	3.53088	-0.814709	1.39854	2.20214	-1.08064	1.798	-2.80021	-0.966923	2.96426	-0.90863	-1.73711
	3.61186	3.19193	1.07476	0.0892906	2.50792	-1.40517	-0.30386	7.86822	2.93999	-1.72914	0.089817	-0.281448	-0.683399	-2.98917	0.0844994	3.10999	-2.21315	-1.4584	-0.522644	0.645046	-0.524849	-1.12833	0.743488	-2.49399	-0.347183	-3.00465	-0.257656	-1.74688	-0.537437	0.646606	-2.08375		3.61186	-0.224655	-1.63953	16.7943	0.687378	2.56981	3.54783	-0.765125	1.53105	2.22885	-1.00758	2.03868	-2.74844	-0.815338	3.01232	-0.954075	-1.82995
	3.6221	3.03912	1.10915	0.167446	2.39791	-1.39124	-0.215263	8.02777	2.96745	-1.73146	0.0310097	-0.167103	-0.684628	-3.12216	0.164143	3.10498	-2.31017	-1.33769	-0.422997	0.689377	-0.562759	-1.14171	0.732819	-2.48161	-0.394676	-2.93898	-0.29274	-1.71536	-0.614342	0.686974	-2.03467		3.6221	-0.24918	-1.53182	16.8832	0.690632	2.60622	3.33844	-0.743801	1.66323	2.33796	-1.00513	2.28889	-2.71449	-0.87804	3.00356	-0.928501	-1.82946
	3.63234	2.89729	1.06813	0.326958	2.34772	-1.37113	-0.266262	8.29177	2.91964	-1.709	-0.0263062	-0.106758	-0.761589	-3.16311	0.0998535	3.06702	-2.33911	-1.21438	-0.37373	0.778236	-0.599808	-1.08531	0.767174	-2.49738	-0.324173	-2.89461	-0.275665	-1.63979	-0.61322	0.786942	-1.9767		3.63234	-0.218159	-1.48155	16.9844	0.584297	2.81566	3.21281	-0.725788	1.84309	2.35767	-0.957317	2.42443	-2.71153	-0.951214	2.96462	-0.993046	-1.7915
	3.64258	2.79411	1.02837	0.434116	2.27077	-1.38906	-0.334663	8.41196	2.8539	-1.78577	-0.0986404	-0.159294	-0.75087	-3.13978	8.7738e-05	3.00476	-2.36339	-1.08743	-0.298103	0.780277	-0.637074	-1.05764	0.767879	-2.58271	-0.266037	-2.90124	-0.310917	-1.54323	-0.627777	0.798767	-2.03102		3.64258	-0.0935135	-1.27272	16.9656	0.542896	3.02382	3.26115	-0.789158	2.1228	2.30115	-1.02559	2.59802	-2.67329	-0.850674	3.00543	-0.943691	-1.6519
	3.65282	2.59348	1.00153	0.469536	2.09433	-1.35567	-0.439426	8.5607	2.82225	-1.8118	-0.301823	-0.286469	-0.719116	-3.19255	-0.0917168	2.81307	-2.31977	-1.0337	-0.285599	0.764469	-0.739914	-1.01406	0.74226	-2.47385	-0.197372	-2.98798	-0.292797	-1.52787	-0.614296	0.73922	-2.03716		3.65282	0.067524	-1.19477	16.8849	0.378033	3.12305	3.26767	-0.831478	2.29376	2.37642	-1.16002	2.80787	-2.65907	-0.786991	3.00061	-0.968067	-1.60988
	3.66306	2.534	0.900856	0.485756	1.98107	-1.36707	-0.451382	8.75135	2.848	-1.85835	-0.453468	-0.261803	-0.648163	-3.28791	-0.1325	2.63455	-2.1573	-1.11283	-0.327797	0.816837	-0.743481	-1.0817	0.650543	-2.45855	-0.206348	-2.98304	-0.279861	-1.33764	-0.629147	0.647415	-1.95213		3.66306	0.262409	-1.18272	16.7277	0.300045	3.17917	3.23063	-0.861546	2.53733	2.46701	-1.18287	3.05956	-2.61112	-0.940578	3.06557	-1.00339	-1.58305
	3.6733	2.48424	0.863293	0.528744	2.00413	-1.31433	-0.524399	8.95784	2.84898	-1.90838	-0.5364	-0.370426	-0.612053	-3.2605	-0.117775	2.50309	-2.11811	-1.14876	-0.348682	0.861351	-0.843414	-1.1017	0.601631	-2.50304	-0.316711	-3.00293	-0.206764	-1.2238	-0.540062	0.608986	-1.77686		3.6733	0.403339	-1.15931	16.5357	0.276691	3.25871	3.17946	-0.815136	2.70217	2.51686	-1.20297	3.2976	-2.63072	-1.11872	3.1159	-1.03037	-1.47105
	3.68354	2.54896	0.682594	0.549404	1.90527	-1.2362	-0.497421	9.09921	2.7914	-1.82496	-0.615654	-0.42308	-0.545593	-3.20407	-0.101944	2.29627	-2.1383	-1.17936	-0.255795	0.955204	-0.930042	-1.08373	0.443642	-2.66896	-0.344894	-2.98827	-0.155495	-1.06017	-0.399071	0.672119	-1.59968		3.68354	0.49667	-0.928349	16.3531	0.274174	3.3026	3.05787	-0.707203	2.75332	2.39447	-1.04405	3.50996	-2.66938	-1.15708	3.1332	-1.07037	-1.23735
	3.69378	2.43646	0.526348	0.615173	1.94097	-1.08443	-0.449772	9.34644	2.78087	-1.63054	-0.662094	-0.549026	-0.563511	-3.29617	0.0188637	2.22891	-2.22446	-1.16512	-0.219879	0.982098	-1.00147	-1.12801	0.367477	-2.68785	-0.355217	-3.01797	-0.144871	-0.950287	-0.361679	0.770584	-1.52761		3.69378	0.595623	-0.890213	16.0122	0.192623	3.30557	2.86538	-0.730152	3.02141	2.36769	-1.04715	3.67522	-2.61231	-1.16315	3.104	-1.03478	-1.06724
	3.70402	2.39454	0.440804	0.692062	1.83052	-0.967369	-0.54911	9.58775	2.81721	-1.67765	-0.700912	-0.58176	-0.417458	-3.28069	0.0443726	2.35973	-2.19136	-0.994644	-0.163109	1.00391	-0.992188	-1.09807	0.270203	-2.61051	-0.279232	-2.92672	-0.255547	-0.742775	-0.389511	0.866226	-1.52921		3.70402	0.767452	-0.758404	15.6349	0.14362	3.44318	2.7168	-0.651295	3.27658	2.41551	-1.06109	3.71882	-2.55715	-1.17757	3.11487	-1.05841	-0.968021
	3.71426	2.24607	0.323524	0.644318	1.67196	-0.935825	-0.605686	9.80739	2.91388	-1.74532	-0.708336	-0.611385	-0.324795	-3.26339	-0.0638924	2.35533	-2.13168	-0.854179	-0.0907745	0.909405	-1.03492	-1.1316	0.166382	-2.66113	-0.201508	-2.85463	-0.335964	-0.539894	-0.410278	0.92086	-1.43635		3.71426	0.896328	-0.625366	15.2738	0.083786	3.56752	2.66935	-0.59684	3.38399	2.36072	-1.04675	3.78103	-2.52764	-1.22694	3.13346	-0.926811	-0.859566
	3.7245	2.1313	0.131935	0.581902	1.60643	-0.785393	-0.630829	10.1687	2.99482	-1.85346	-0.881466	-0.584015	-0.314003	-3.21197	-0.0558472	2.2789	-2.17523	-0.797829	-0.084301	0.820389	-1.11536	-1.02805	0.156845	-2.55478	-0.142475	-2.70805	-0.290653	-0.367817	-0.405689	0.854614	-1.30405		3.7245	1.00973	-0.538666	14.7756	0.0188637	3.66288	2.71066	-0.578648	3.57642	2.27445	-0.952702	3.90075	-2.49632	-1.30758	3.11824	-0.8578	-0.694485
	3.73474	2.03134	0.0165863	0.449162	1.48944	-0.616035	-0.698658	10.2724	2.91797	-1.83277	-1.0194	-0.630554	-0.370594	-3.20897	-0.120647	2.25778	-2.14798	-0.789722	-0.119682	0.740353	-1.11068	-1.06912	0.127628	-2.48174	-0.162834	-2.64775	-0.24408	-0.182434	-0.419518	0.741257	-1.19672		3.73474	1.03696	-0.510601	14.2107	-0.0438995	3.73484	2.69654	-0.533073	3.69365	2.252	-0.968773	4.13297	-2.44406	-1.182	3.0756	-0.871235	-0.582832
	3.74498	2.06106	-0.141033	0.477425	1.31958	-0.53447	-0.684601	10.3983	2.79419	-1.81622	-1.06644	-0.669453	-0.321384	-3.23752	-0.187241	2.21521	-2.12439	-0.685738	-0.0981178	0.664574	-1.19217	-1.08805	0.125435	-2.49619	-0.193581	-2.5223	-0.09515	-0.145752	-0.476345	0.805992	-1.06963		3.74498	1.07109	-0.510902	13.5408	-0.103848	3.78172	2.61044	-0.526241	3.91267	2.19025	-0.947552	4.21929	-2.36546	-1.12283	3.08599	-0.969395	-0.629562
	3.75522	2.05677	-0.126942	0.57085	1.18543	-0.469826	-0.73138	10.5406	2.68058	-1.7896	-0.967163	-0.727913	-0.343437	-3.26047	-0.216194	2.07725	-2.13074	-0.567657	-0.112804	0.600842	-1.22646	-1.08307	0.0155869	-2.5366	-0.321217	-2.48252	-0.00216675	0.0692062	-0.549828	0.775902	-0.895042		3.75522	1.18253	-0.408607	12.9724	-0.261456	3.92355	2.58514	-0.505337	4.11032	2.19715	-0.937634	4.36106	-2.3525	-1.02356	3.17633	-1.04084	-0.481625
	3.76546	2.13907	-0.292618	0.640541	1.13908	-0.401196	-0.793095	10.621	2.60083	-1.77721	-0.973434	-0.853401	-0.302788	-3.42111	-0.207291	1.94027	-2.07609	-0.385437	-0.195061	0.514641	-1.21084	-1.06861	-0.0374985	-2.56223	-0.337429	-2.47189	0.0702896	0.297501	-0.6474	0.68243	-0.613052		3.76546	1.24389	-0.215237	12.3456	-0.383839	4.01848	2.61598	-0.468369	4.28334	2.20466	-0.808414	4.4063	-2.38901	-1.00597	3.21891	-0.992771	-0.387794
	3.7757	2.0402	-0.441357	0.536625	1.02543	-0.293896	-0.918076	10.7858	2.6225	-1.82072	-1.05964	-0.819916	-0.340317	-3.49283	-0.191326	1.92834	-1.88169	-0.280029	-0.113533	0.395241	-1.33627	-1.1894	-0.117775	-2.54658	-0.398525	-2.41395	0.0561028	0.413517	-0.565441	0.624447	-0.394745		3.7757	1.32845	-0.0509224	11.6081	-0.453289	4.11373	2.58989	-0.326832	4.3232	2.10254	-0.751873	4.48953	-2.43649	-0.942234	3.16272	-1.03237	-0.420269
	3.78594	2.05993	-0.49202	0.529293	0.969234	-0.244339	-1.11837	10.9139	2.69495	-1.88788	-0.991295	-0.981327	-0.283047	-3.50593	-0.247246	1.86621	-1.78757	-0.234909	-0.0163994	0.164715	-1.43491	-1.26741	-0.18837	-2.49683	-0.44162	-2.30688	-0.0454865	0.471405	-0.580498	0.593704	-0.23037		3.78594	1.2534	0.04142	10.9285	-0.557774	4.16589	2.48729	-0.226658	4.37114	1.9834	-0.759811	4.51887	-2.38585	-0.935333	3.20034	-0.891773	-0.372776
	3.79618	2.04249	-0.534851	0.419777	0.905518	-0.140484	-1.19773	11.0244	2.66933	-1.96764	-1.00741	-1.10506	-0.289913	-3.43252	-0.338791	1.76349	-1.74449	-0.164925	-0.0938148	0.154404	-1.52953	-1.3247	-0.186523	-2.53112	-0.407669	-2.39347	-0.140865	0.670113	-0.679562	0.557308	-0.156921		3.79618	1.26143	0.239353	10.2985	-0.537331	4.18674	2.35378	-0.31702	4.48467	1.96926	-0.860676	4.56535	-2.23141	-0.883358	3.34724	-0.832111	-0.24194
	3.80642	2.00089	-0.562126	0.217216	0.785713	-0.0674438	-1.29824	11.0207	2.56564	-1.90973	-0.930115	-1.18204	-0.162109	-3.51351	-0.402054	1.70738	-1.77979	-0.0629616	-0.175388	0.192657	-1.61085	-1.34666	-0.201424	-2.60519	-0.400063	-2.40456	-0.201294	0.791397	-0.78331	0.508934	-0.201115		3.80642	1.33128	0.268406	9.70623	-0.59436	4.14124	2.16669	-0.32267	4.6196	1.96402	-0.865669	4.58009	-2.11679	-0.70676	3.34931	-0.862247	-0.0311928
	3.81666	2.04596	-0.708744	0.170544	0.712208	0.0840454	-1.40506	11.0474	2.46356	-1.91748	-0.855465	-1.28157	-0.223549	-3.51709	-0.383923	1.66541	-1.90694	-0.0165176	-0.109741	0.276451	-1.63817	-1.34591	-0.179703	-2.56257	-0.414082	-2.44218	-0.239319	0.857082	-0.861488	0.334991	-0.0982361		3.81666	1.38529	0.375027	9.09397	-0.65543	4.22178	2.12241	-0.263317	4.71441	1.85218	-0.784748	4.60213	-2.17546	-0.698872	3.29848	-0.83514	0.0873375
	3.8269	2.02376	-0.817295	0.236301	0.617935	0.29818	-1.37113	11.0658	2.43909	-1.89351	-0.648361	-1.38037	-0.214249	-3.57399	-0.459763	1.67883	-1.99338	-0.036068	-0.0866127	0.33889	-1.68994	-1.405	-0.218697	-2.5556	-0.428959	-2.36874	-0.18782	0.884811	-0.96397	0.300362	0.166695		3.8269	1.47048	0.511127	8.41539	-0.653843	4.34007	2.01056	-0.283535	4.60604	1.73228	-0.700218	4.71345	-2.09755	-0.680714	3.38202	-0.76973	0.167271
	3.83714	2.03246	-0.839386	0.306515	0.59264	0.422173	-1.27686	10.9401	2.33016	-1.95666	-0.683052	-1.48267	-0.185593	-3.56199	-0.582714	1.68388	-1.91822	-0.128311	-0.0829315	0.217094	-1.61914	-1.36523	-0.28244	-2.46418	-0.448082	-2.33064	-0.169502	1.03604	-0.937363	0.259918	0.24778		3.83714	1.52203	0.532528	7.56953	-0.63905	4.35607	2.00693	-0.150211	4.53531	1.7752	-0.645824	4.77176	-2.07636	-0.811417	3.43124	-0.704197	0.26564
	3.84738	2.0974	-0.805458	0.245026	0.490406	0.547009	-1.28732	10.8798	2.18385	-2.05743	-0.672825	-1.40837	-0.144135	-3.50159	-0.779282	1.48866	-1.86298	-0.105988	-0.0202484	0.0745697	-1.59994	-1.44214	-0.325653	-2.39359	-0.44416	-2.25931	-0.140892	1.12437	-1.03292	0.194901	0.380413		3.84738	1.55892	0.592785	6.88993	-0.608486	4.30067	2.07647	-0.0333138	4.45495	1.82181	-0.655468	4.80185	-1.97094	-0.872261	3.52452	-0.728413	0.338894
	3.85762	2.0873	-0.890297	0.217442	0.396408	0.635864	-1.32655	10.6872	1.99185	-2.11932	-0.580952	-1.46812	-0.288746	-3.5083	-0.803562	1.38077	-1.76018	0.0395203	0.0314178	-0.0292358	-1.69411	-1.52423	-0.340279	-2.40272	-0.534351	-2.28816	-0.259418	1.37041	-1.1103	0.260323	0.559372		3.85762	1.59761	0.669701	6.3096	-0.711674	4.36624	2.02944	-0.0225372	4.44495	1.91084	-0.634331	4.70534	-1.91203	-0.898712	3.63148	-0.796322	0.499767
	3.86786	2.14945	-1.06877	0.207691	0.292923	0.819675	-1.34298	10.4884	1.81324	-2.16415	-0.590416	-1.51685	-0.332088	-3.46496	-0.847397	1.1874	-1.79816	0.2257	0.0766068	-0.0991783	-1.68947	-1.47985	-0.323269	-2.41067	-0.622841	-2.18195	-0.333649	1.64215	-1.09844	0.224762	0.688736		3.86786	1.59451	0.665527	5.83586	-0.760647	4.48523	1.9076	0.0407639	4.32817	1.90595	-0.653191	4.60497	-1.88599	-0.866611	3.55802	-0.739651	0.584797
	3.8781	2.0979	-1.22794	0.18145	0.23481	0.963631	-1.4459	10.1927	1.70796	-2.0817	-0.512741	-1.6177	-0.286362	-3.47153	-0.931496	1.04955	-1.83407	0.368004	0.133984	-0.180359	-1.74175	-1.53912	-0.42717	-2.39996	-0.767418	-2.19539	-0.425026	1.8537	-0.969933	0.229149	0.790779		3.8781	1.57576	0.702232	5.31864	-0.843674	4.48694	1.79837	0.1203	4.19167	1.86546	-0.671276	4.56945	-1.80877	-0.871365	3.52726	-0.656254	0.684792
	3.88834	1.96126	-1.29095	0.0631714	0.0648308	1.01828	-1.61489	10.0085	1.62713	-2.09352	-0.580509	-1.6874	-0.285919	-3.44706	-0.956116	1.0392	-1.78003	0.378613	0.106983	-0.235756	-1.80876	-1.54522	-0.653191	-2.37227	-0.902687	-2.09124	-0.465889	1.99629	-0.904404	0.155571	0.891953		3.88834	1.52933	0.745266	4.91433	-0.86705	4.53221	1.66906	0.134365	4.16397	1.91118	-0.72226	4.62988	-1.68763	-0.980373	3.49898	-0.598248	0.634663
	3.89858	1.93653	-1.31873	0.00537872	-0.0665741	0.949219	-1.69672	9.5818	1.61715	-2.094	-0.55085	-1.72152	-0.372799	-3.47402	-0.959583	0.938396	-1.66924	0.274605	0.0680733	-0.272247	-1.8799	-1.49707	-0.845978	-2.36895	-0.893612	-2.00815	-0.466808	2.09937	-0.865898	0.0407486	1.00243		3.89858	1.57576	0.847927	4.38153	-0.957722	4.5482	1.63162	0.195415	4.14651	1.88005	-0.62278	4.50466	-1.65261	-0.922375	3.47888	-0.692589	0.78109
	3.90882	1.95921	-1.38792	0.025074	-0.0923347	0.941986	-1.7312	9.27752	1.46839	-1.99289	-0.456245	-1.8113	-0.319836	-3.44205	-0.780758	0.828197	-1.54741	0.273743	0.0631714	-0.418816	-1.84639	-1.36165	-0.903912	-2.37955	-0.822395	-2.00513	-0.587616	2.20169	-0.944897	-0.0936241	1.08324		3.90882	1.60716	0.873821	3.85347	-0.909096	4.54529	1.57726	0.386341	4.15611	1.9362	-0.600941	4.38365	-1.72076	-0.830799	3.48958	-0.590687	0.835041
	3.91906	1.88874	-1.37304	-0.0152664	-0.155708	1.00943	-1.72964	9.00207	1.30907	-1.94163	-0.367817	-1.89594	-0.294228	-3.48534	-0.732143	0.637249	-1.52351	0.335258	0.111858	-0.476501	-1.85741	-1.44726	-1.07645	-2.38066	-0.750263	-2.1481	-0.673576	2.23183	-1.10243	-0.286457	1.14777		3.91906	1.65394	0.900429	3.36686	-0.882252	4.5773	1.49253	0.433727	4.12387	1.99715	-0.671524	4.28633	-1.73654	-0.831383	3.45336	-0.497551	0.863071
	3.9293	1.92783	-1.47118	-0.107201	-0.246639	1.16846	-1.81468	8.69072	1.26248	-1.9844	-0.358948	-1.96546	-0.338932	-3.49287	-0.7295	0.55106	-1.512	0.307446	0.115993	-0.526093	-1.91948	-1.44939	-1.13526	-2.37888	-0.687653	-2.13745	-0.560268	2.27093	-1.10497	-0.416428	1.28849		3.9293	1.77204	0.934368	2.89529	-0.861462	4.53939	1.32753	0.523598	4.06519	1.99507	-0.90807	4.24941	-1.74567	-0.78302	3.36898	-0.457104	0.8619
	3.93954	1.94295	-1.4649	-0.125168	-0.295242	1.34852	-1.9483	8.29224	1.20686	-2.12259	-0.333817	-1.94459	-0.231987	-3.59689	-0.859306	0.561943	-1.5489	0.287498	0.201874	-0.44268	-2.04565	-1.51963	-1.22299	-2.2793	-0.714859	-2.04941	-0.411888	2.2238	-1.10156	-0.374958	1.38649		3.93954	1.71718	0.972347	2.46622	-0.941402	4.48891	1.2412	0.589149	4.02942	1.99268	-0.992508	4.13958	-1.66373	-0.907322	3.29734	-0.501781	0.901825
	3.94978	2.00262	-1.45591	-0.149651	-0.415428	1.42745	-1.92917	7.92522	1.02411	-2.07785	-0.328465	-1.98501	-0.240082	-3.52392	-0.979172	0.558037	-1.50659	0.28463	0.331417	-0.52919	-2.12948	-1.56776	-1.31358	-2.24511	-0.660461	-1.91966	-0.517437	2.26864	-1.10328	-0.382145	1.38805		3.94978	1.57615	1.04959	2.02486	-0.861305	4.52096	1.10517	0.696629	3.89259	1.99222	-0.897129	4.08115	-1.62155	-0.901169	3.24735	-0.436214	1.11425
	3.96002	2.02	-1.54642	-0.0720444	-0.383682	1.4491	-1.88672	7.53121	0.950424	-2.04576	-0.316402	-2.10035	-0.253616	-3.52164	-1.06094	0.531975	-1.52364	0.288254	0.386612	-0.60062	-2.18781	-1.60572	-1.40056	-2.23664	-0.709663	-1.99916	-0.629112	2.42079	-1.21456	-0.507076	1.48158		3.96002	1.48311	1.04133	1.66846	-0.808437	4.6424	1.02749	0.756748	3.71031	2.03632	-0.85619	3.98975	-1.48811	-0.847858	3.19148	-0.411266	1.208
	3.97026	2.00336	-1.65228	-0.119621	-0.394302	1.55891	-1.99567	7.14287	0.837006	-1.93431	-0.304195	-2.10454	-0.251457	-3.5841	-1.12817	0.47591	-1.503	0.287918	0.348583	-0.677189	-2.11782	-1.6751	-1.36572	-2.3141	-0.825058	-2.03085	-0.696964	2.548	-1.14976	-0.653156	1.48894		3.97026	1.42458	1.15995	1.36282	-0.814121	4.62599	1.04523	0.790661	3.4766	2.2013	-0.767986	3.85823	-1.35998	-0.917465	3.09925	-0.434093	1.24833
	3.9805	1.87867	-1.61337	-0.210625	-0.454494	1.58874	-2.10846	6.81744	0.721542	-2.03737	-0.263996	-2.24458	-0.236233	-3.58044	-1.04978	0.363079	-1.43395	0.15028	0.327827	-0.743813	-2.09583	-1.72748	-1.27283	-2.31809	-0.867065	-1.94876	-0.78561	2.63177	-1.0763	-0.626526	1.46752		3.9805	1.30106	1.36563	0.976414	-1.03752	4.42391	0.94376	0.807732	3.38376	2.30989	-0.659435	3.82377	-1.30971	-0.957329	3.09398	-0.504047	1.39089
	3.99074	1.90755	-1.64208	-0.257595	-0.591774	1.629	-2.19284	6.41001	0.693993	-2.14465	-0.145134	-2.29294	-0.182243	-3.64671	-1.14023	0.339653	-1.45353	0.215702	0.228767	-0.829788	-2.21812	-1.74281	-1.20444	-2.32961	-0.876637	-1.95856	-0.962814	2.70911	-1.01525	-0.637432	1.41546		3.99074	1.12452	1.49204	0.711338	-1.41883	4.29047	0.864082	0.763027	3.30221	2.25241	-0.670486	3.69653	-1.24725	-0.886806	3.1236	-0.550457	1.53016
	4.00098	1.85951	-1.61396	-0.271698	-0.627907	1.67122	-2.13947	5.96868	0.66872	-2.16268	-0.196442	-2.30194	-0.160545	-3.76488	-1.12019	0.222153	-1.58315	0.294666	0.186554	-0.862488	-2.32397	-1.75311	-1.25714	-2.35896	-0.753613	-1.97599	-1.06805	2.70417	-1.10756	-0.606972	1.47575		4.00098	1.07846	1.59626	0.433678	-1.33667	4.15216	0.85165	0.709255	3.2422	2.21257	-0.747852	3.66159	-1.19862	-0.741142	3.08773	-0.449833	1.72036
	4.01122	1.79979	-1.57164	-0.202248	-0.733753	1.71917	-2.04002	5.58254	0.662178	-2.14399	-0.161072	-2.51684	-0.0638351	-3.78413	-1.10014	0.133625	-1.68015	0.378731	0.227146	-0.911003	-2.27756	-1.83849	-1.31621	-2.23898	-0.682087	-1.89687	-1.22201	2.66319	-1.15552	-0.552269	1.56634		4.01122	1.02825	1.71035	0.0903206	-1.22393	4.08915	0.865608	0.585751	3.11566	2.27774	-0.776978	3.5553	-1.21445	-0.701267	3.04794	-0.497551	1.80213
	4.02146	1.77976	-1.5951	-0.203606	-0.684269	1.72128	-2.1601	5.28121	0.540058	-2.24759	-0.213371	-3.07236	0.0424194	-3.69226	-0.963982	-0.0344963	-1.64759	0.402847	0.243977	-0.999851	-2.29549	-1.87806	-1.30658	-2.19324	-0.581165	-1.88396	-1.32423	2.62077	-1.18364	-0.642117	1.62802		4.02146	0.948017	1.94929	-0.180248	-0.92667	3.92436	0.88002	0.533932	3.01701	2.36844	-0.784298	3.26915	-1.22934	-0.563137	2.96567	-0.516563	1.92786
	4.0317	1.76908	-1.74295	-0.208206	-0.687572	1.72956	-2.18243	4.85406	0.390686	-2.28047	-0.110146	-3.1418	0.0067749	-3.56508	-0.957352	-0.0251236	-1.69776	0.470581	0.321762	-1.09184	-2.30765	-1.8635	-1.40604	-2.20191	-0.526211	-1.85315	-1.43658	2.61444	-1.17279	-0.774021	1.6022		4.0317	0.900394	2.02212	-0.448887	-0.764328	3.88331	0.903385	0.5513	2.95671	2.52016	-0.84309	3.06992	-1.32744	-0.535923	2.95259	-0.564663	1.94457
	4.04194	1.75206	-1.71215	-0.0951958	-0.667435	1.71185	-2.20331	4.44733	0.220146	-2.12424	-0.114365	-2.98174	0.0438843	-3.56472	-1.13961	-0.140198	-1.72081	0.317661	0.405613	-1.11977	-2.47326	-1.90036	-1.40725	-2.23516	-0.516613	-1.89672	-1.44582	2.57432	-1.2029	-0.910744	1.61385		4.04194	0.956264	2.0802	-0.659042	-0.585361	3.81219	0.818508	0.748272	2.77176	2.46499	-0.938374	2.96333	-1.25525	-0.468258	2.91443	-0.507027	1.95274
	4.05218	1.75024	-1.75861	-0.0714989	-0.646503	1.77635	-2.18258	4.05012	0.0776558	-2.02118	-0.055748	-2.84085	-0.0228348	-3.6572	-1.25886	-0.202057	-1.75099	0.311939	0.499016	-1.11566	-2.52306	-2.01069	-1.39843	-2.16655	-0.524815	-1.92334	-1.36739	2.61585	-1.2774	-1.01287	1.61983		4.05218	0.822346	2.23595	-0.860973	-0.614735	3.7456	0.816662	0.811272	2.53879	2.38623	-0.959545	2.83491	-1.2075	-0.4762	2.76805	-0.45734	2.02182
	4.06242	1.70308	-1.72881	-0.125511	-0.543613	1.8426	-2.29468	3.79241	-0.00159454	-2.12312	-0.014267	-2.73122	-0.0213928	-3.55744	-1.21499	-0.219997	-1.73203	0.326981	0.489704	-1.21085	-2.51314	-2.05661	-1.44008	-2.17004	-0.603233	-1.87024	-1.31776	2.59188	-1.29652	-1.10874	1.59023		4.06242	0.746185	2.38441	-1.09749	-0.572758	3.56427	0.759369	0.746899	2.39798	2.29352	-1.02874	2.73548	-1.15374	-0.484127	2.47383	-0.39621	2.08853
	4.07266	1.64153	-1.74933	-0.0644989	-0.38335	1.88931	-2.14159	3.46758	-0.0640488	-2.32833	0.0766449	-2.67361	0.00938416	-3.43927	-1.15792	-0.317284	-1.73189	0.300652	0.435833	-1.37368	-2.55399	-2.07557	-1.4458	-2.27666	-0.700912	-1.87878	-1.36764	2.54283	-1.29805	-1.25916	1.5638		4.07266	0.708633	2.48589	-1.33707	-0.513321	3.30018	0.691204	0.788849	2.33368	2.28241	-1.09268	2.6314	-1.20013	-0.487896	2.38027	-0.416264	2.20459
	4.0829	1.43608	-1.65838	-0.00352478	-0.245865	1.8469	-2.11428	3.13985	-0.102539	-2.3808	0.211361	-2.71021	-0.141869	-3.42379	-1.00295	-0.411064	-1.64363	0.157814	0.37207	-1.38853	-2.62762	-2.16522	-1.45421	-2.29909	-0.706131	-1.85526	-1.35309	2.56043	-1.30527	-1.23203	1.59541		4.0829	0.716061	2.6491	-1.50662	-0.402683	3.07711	0.655361	0.668747	2.17147	2.36201	-1.18306	2.49266	-1.11866	-0.416714	2.39696	-0.314278	2.35598
	4.09314	1.34247	-1.72202	0.00119781	-0.105019	1.73269	-1.99503	2.81512	-0.290867	-2.37841	0.169018	-2.70621	-0.269482	-3.45655	-1.00106	-0.506886	-1.68793	0.235191	0.513069	-1.54222	-2.64651	-2.22983	-1.37637	-2.2162	-0.69352	-1.79089	-1.51144	2.54623	-1.24381	-1.27892	1.49474		4.09314	0.669117	2.89715	-1.70594	-0.394695	3.08707	0.631672	0.667377	2.05468	2.5166	-1.17514	2.4282	-1.01684	-0.316936	2.28859	-0.171597	2.65574
	4.10338	1.31577	-1.77579	-0.0160904	0.059288	1.68144	-1.90742	2.6246	-0.329872	-2.34201	0.223331	-2.69475	-0.308914	-3.508	-0.899002	-0.579056	-1.63018	0.289299	0.640648	-1.65262	-2.68686	-2.24306	-1.23376	-2.27323	-0.725586	-1.57206	-1.64812	2.64063	-1.26304	-1.27252	1.42597		4.10338	0.535328	3.01844	-1.90639	-0.331776	3.02015	0.614017	0.754086	1.95012	2.54272	-1.3461	2.2924	-0.871189	-0.30653	2.16592	-0.221256	2.78636
	4.11362	1.25909	-1.82516	0.116386	0.178017	1.59158	-1.9894	2.40473	-0.36002	-2.3473	0.231102	-2.63923	-0.40247	-3.4422	-0.881622	-0.751564	-1.62852	0.402454	0.750748	-1.6741	-2.7541	-2.27609	-1.15535	-2.29134	-0.655529	-1.51823	-1.6595	2.69926	-1.29318	-1.30702	1.3888		4.11362	0.466328	3.18071	-2.14868	-0.287014	2.87556	0.592739	0.826077	1.85535	2.50795	-1.30722	2.09956	-0.914806	-0.397869	2.0004	-0.137966	2.90358
	4.12386	1.19412	-1.89174	0.276951	0.234978	1.65469	-2.24138	2.13551	-0.449642	-2.41486	0.245098	-2.64726	-0.409969	-3.33838	-0.824818	-0.869389	-1.6718	0.435165	0.731304	-1.6843	-2.67676	-2.16333	-1.16007	-2.23829	-0.78109	-1.3255	-1.79027	2.65811	-1.30584	-1.26237	1.49776		4.12386	0.322086	3.3927	-2.26985	-0.30785	2.70195	0.627247	0.712864	1.84636	2.54626	-1.34899	2.02188	-0.910778	-0.345783	1.82174	-0.0872192	3.06384
	4.1341	1.10083	-1.86766	0.352257	0.269463	1.63861	-2.45424	1.92664	-0.659641	-2.37955	0.305584	-2.65883	-0.39328	-3.28717	-0.867531	-0.915321	-1.64923	0.414246	0.705605	-1.69067	-2.66056	-2.11304	-1.07094	-2.30506	-0.845345	-1.17527	-1.85036	2.65751	-1.39138	-1.29399	1.58583		4.1341	0.218277	3.53712	-2.37719	-0.285095	2.54603	0.59362	0.590973	1.71062	2.65477	-1.27267	1.79241	-0.809353	-0.239628	1.61756	0.0225487	3.05655
	4.14434	1.13359	-1.72256	0.460438	0.339893	1.6136	-2.26388	1.67642	-0.755127	-2.37311	0.386871	-2.61665	-0.360367	-3.19446	-0.893314	-1.0236	-1.71736	0.436714	0.826244	-1.70351	-2.6763	-2.0695	-0.993668	-2.39818	-0.858757	-1.18871	-1.91997	2.65433	-1.34624	-1.31089	1.59815		4.14434	0.267845	3.71568	-2.59192	-0.28532	2.49965	0.674931	0.509769	1.59144	2.73883	-1.25438	1.70661	-0.677006	-0.215118	1.50408	0.189106	2.99037
	4.15458	1.10678	-1.60979	0.458889	0.357513	1.65405	-1.95895	1.53814	-0.857887	-2.34824	0.369862	-2.6076	-0.380859	-3.0356	-0.81646	-0.999016	-1.80373	0.434902	0.848785	-1.77259	-2.78258	-2.07965	-0.99424	-2.40347	-0.845608	-1.21475	-1.86984	2.66974	-1.47147	-1.29419	1.59668		4.15458	0.15847	3.79221	-2.84751	-0.340145	2.47224	0.897484	0.503353	1.46815	2.76236	-1.19794	1.43054	-0.664837	-0.111851	1.36422	0.379246	2.99028
	4.16482	1.06569	-1.67695	0.425285	0.488701	1.54374	-1.74063	1.29646	-0.9683	-2.4101	0.284664	-2.60027	-0.465355	-2.81044	-0.798927	-1.07594	-1.89683	0.532917	0.948254	-1.79745	-2.80193	-2.05935	-0.973518	-2.28567	-0.843914	-1.22014	-1.88208	2.71435	-1.47828	-1.37546	1.51496		4.16482	0.0153847	3.97682	-2.97536	-0.283154	2.2811	0.884922	0.41074	1.34016	2.66004	-1.19105	1.2364	-0.603611	-0.0526962	1.27408	0.505253	3.04843
	4.17506	0.974541	-1.6086	0.413231	0.739506	1.49569	-1.61928	1.04823	-1.1541	-2.45245	0.213604	-2.59696	-0.428444	-2.74271	-0.859806	-0.993999	-1.89114	0.616493	0.894764	-1.79718	-2.80546	-1.98419	-0.851723	-2.36219	-0.763374	-1.11017	-1.85452	2.77757	-1.40292	-1.33155	1.56024		4.17506	-0.0524216	4.09264	-3.18222	-0.248234	2.01778	0.890511	0.341984	1.20265	2.50166	-1.19654	1.14507	-0.530273	0.0724602	1.3844	0.782543	3.15506
	4.1853	0.896721	-1.65968	0.343422	0.935261	1.3423	-1.64716	0.797657	-1.29741	-2.46194	0.199787	-2.48165	-0.416729	-2.63403	-0.876183	-1.01465	-1.85091	0.613548	0.919014	-1.83358	-2.75906	-1.94311	-0.684246	-2.38356	-0.72176	-1.07354	-1.94347	2.81244	-1.36631	-1.40991	1.54689		4.1853	-0.0924644	4.21198	-3.29691	-0.153	1.83046	0.837189	0.249546	1.0907	2.42884	-1.20178	1.07566	-0.497086	0.200111	1.30909	0.930256	3.25926
	4.19554	0.746277	-1.70964	0.368027	1.10997	1.26984	-1.5531	0.689667	-1.31561	-2.3931	0.255577	-2.42183	-0.469131	-2.5604	-0.88118	-1.03593	-1.79598	0.549858	0.935417	-1.86658	-2.77728	-1.92016	-0.464699	-2.35682	-0.575836	-1.03242	-1.91507	2.87855	-1.33106	-1.40081	1.66214		4.19554	-0.138073	4.37924	-3.40854	-0.087101	1.68809	0.850445	0.151138	0.948017	2.36717	-1.20992	0.950069	-0.500759	0.320656	1.11815	1.0099	3.36375
	4.20578	0.595848	-1.71458	0.43774	1.09709	1.30792	-1.42861	0.538498	-1.45723	-2.40069	0.286713	-2.34526	-0.676735	-2.59305	-0.962311	-1.05412	-1.72156	0.539425	0.887791	-1.89043	-2.68865	-1.93838	-0.254829	-2.32748	-0.544792	-0.925491	-1.87026	2.92677	-1.33719	-1.45846	1.61628		4.20578	-0.215263	4.4697	-3.47158	-0.040432	1.56102	0.903542	0.0538902	0.836437	2.43573	-1.09078	0.895554	-0.43716	0.363857	1.07701	1.10008	3.42393
	4.21602	0.657467	-1.65928	0.506882	1.10438	1.32812	-1.38912	0.490002	-1.4415	-2.40825	0.222294	-2.27024	-0.810669	-2.53168	-0.893993	-1.14859	-1.61103	0.570358	0.858788	-2.02075	-2.62026	-2.01089	-0.148113	-2.38062	-0.480766	-0.846344	-1.941	3.09566	-1.45597	-1.47899	1.61542		4.21602	-0.239975	4.63229	-3.58162	-0.00403595	1.43785	0.907902	-0.0198669	0.666409	2.44221	-1.09201	0.833218	-0.46069	0.392895	0.944595	1.25671	3.54088
	4.22626	0.687984	-1.55886	0.530651	1.1645	1.25244	-1.31205	0.367096	-1.40447	-2.38325	0.135284	-2.19439	-0.985085	-2.5158	-0.849899	-1.2716	-1.59388	0.536995	0.9473	-1.99971	-2.5363	-2.16999	-0.0970802	-2.38599	-0.561497	-0.769207	-1.84725	3.3593	-1.45967	-1.55407	1.59694		4.22626	-0.181133	4.78641	-3.71924	0.0989265	1.31767	0.974136	-0.0243263	0.5042	2.43347	-1.14542	0.753613	-0.448746	0.409313	0.822727	1.41464	3.61949
	4.2365	0.623135	-1.50109	0.553528	1.27422	1.12491	-1.19223	0.268188	-1.32116	-2.41571	0.133064	-2.03799	-1.02148	-2.31056	-0.774845	-1.40187	-1.44521	0.574009	1.03827	-1.98437	-2.56258	-2.17771	0.00248337	-2.28957	-0.549397	-0.71035	-1.80101	3.52257	-1.50474	-1.62327	1.64164		4.2365	-0.144047	4.82506	-3.69221	0.306267	1.16791	0.969368	-0.00527573	0.495667	2.45407	-1.13521	0.663834	-0.282116	0.360317	0.620823	1.54081	3.69027
	4.24674	0.421181	-1.44521	0.544254	1.27172	1.01835	-1.1713	0.143867	-1.1228	-2.43771	0.158371	-1.94548	-1.07983	-2.31218	-0.719627	-1.47367	-1.36989	0.573296	1.10389	-2.04786	-2.46991	-2.21183	0.0348129	-2.17369	-0.562641	-0.685413	-1.77356	3.47694	-1.63687	-1.53188	1.68469		4.24674	-0.052124	4.95368	-3.76237	0.357109	1.01517	0.948902	0.0369987	0.387447	2.38176	-1.18697	0.513393	-0.0803642	0.449459	0.458366	1.70162	3.69114
	4.25698	0.352623	-1.3879	0.561157	1.2688	0.950329	-1.14306	0.0788269	-0.990566	-2.41823	0.0662956	-1.82472	-1.08404	-2.31233	-0.674816	-1.33888	-1.37014	0.505451	1.1279	-2.16771	-2.37726	-2.21244	0.0900421	-2.08857	-0.591026	-0.610241	-1.7029	3.60707	-1.62965	-1.4258	1.7062		4.25698	-0.108105	5.12282	-3.82646	0.346691	0.918491	0.944393	0.0314064	0.232548	2.33055	-1.10098	0.326424	0.0698051	0.592953	0.434032	1.79308	3.77296
	4.26722	0.26329	-1.33443	0.597553	1.46067	0.827423	-1.0236	-0.0761566	-0.919983	-2.41301	0.103416	-1.66069	-1.04112	-2.20738	-0.696274	-1.2722	-1.39209	0.468582	1.12468	-2.17665	-2.43183	-2.26997	0.28347	-2.01914	-0.605473	-0.497658	-1.65887	3.61431	-1.67767	-1.31254	1.8133		4.26722	-0.154133	5.19146	-3.95647	0.291737	0.876408	0.888294	0.00400162	0.0972557	2.2921	-1.08807	0.0508614	0.076931	0.793343	0.316326	1.95732	3.81899
	4.27746	0.29805	-1.28825	0.614792	1.54636	0.772373	-0.971134	-0.175865	-0.901993	-2.43183	0.187256	-1.45964	-1.01784	-2.17859	-0.653538	-1.26854	-1.29343	0.578598	1.21222	-2.07002	-2.45546	-2.33941	0.348724	-1.98347	-0.651772	-0.41885	-1.59101	3.72551	-1.78595	-1.29401	1.84917		4.27746	-0.156898	5.2959	-3.93172	0.374012	0.758141	0.938873	-0.0888519	0.108559	2.38211	-0.986904	0.0315132	0.103489	0.834923	0.288113	2.00013	3.72323
	4.2877	0.279598	-1.30339	0.644711	1.56607	0.679699	-0.848946	-0.306244	-0.847183	-2.41699	0.121716	-1.2784	-1.06225	-2.13074	-0.633293	-1.39283	-1.28587	0.665955	1.18739	-2.03009	-2.51938	-2.27367	0.473312	-1.88707	-0.628967	-0.296421	-1.5476	3.73283	-1.91865	-1.12094	1.85027		4.2877	-0.178761	5.31293	-3.87974	0.371189	0.538284	0.909046	-0.0191612	-0.0366249	2.35658	-0.955517	0.021595	0.164051	0.889759	0.318985	2.04385	3.62503
	4.29794	0.213852	-1.35622	0.597336	1.61152	0.603966	-0.739487	-0.406403	-0.848873	-2.54533	0.133911	-1.13736	-1.11706	-2.09072	-0.681778	-1.29661	-1.32669	0.768951	1.1715	-2.06561	-2.6071	-2.15334	0.424805	-1.70489	-0.737759	-0.283714	-1.53067	3.85783	-1.94599	-1.07306	1.84614		4.29794	-0.182087	5.29222	-3.95457	0.467129	0.388912	0.77792	-0.0354576	-0.138729	2.28418	-0.933628	-0.00119781	0.165134	0.871555	0.393848	2.18722	3.55383
	4.30818	0.155334	-1.40086	0.611275	1.76231	0.572983	-0.608871	-0.375114	-0.909195	-2.58659	0.0750122	-1.05528	-1.03784	-1.8546	-0.744125	-1.31369	-1.32312	0.700523	1.30093	-2.06195	-2.63122	-2.05041	0.466042	-1.53881	-0.731407	-0.260731	-1.56719	4.08527	-2.00048	-0.991413	1.91714		4.30818	-0.15163	5.19498	-4.04831	0.561161	0.284618	0.685661	-0.00304794	-0.15728	2.24503	-1.04623	0.0407028	0.280293	0.822968	0.367599	2.22259	3.45548
	4.31842	0.0813751	-1.39204	0.643021	1.94457	0.493591	-0.50808	-0.410648	-0.919052	-2.64847	0.0294342	-1.01393	-1.01316	-1.76294	-0.748917	-1.25955	-1.25547	0.632004	1.34357	-2.06743	-2.64925	-2.03985	0.489895	-1.51754	-0.569199	-0.206421	-1.424	4.12871	-1.92333	-0.917953	2.00947		4.31842	-0.153214	5.242	-4.11591	0.661724	0.175137	0.567417	-0.0638199	-0.433071	2.26561	-0.968773	0.154301	0.295227	0.804607	0.31242	2.29397	3.43081
	4.32866	0.0436592	-1.27903	0.635342	2.02623	0.400688	-0.306698	-0.416489	-0.907776	-2.56456	-0.0815353	-0.969143	-1.02859	-1.75638	-0.696201	-1.29294	-1.43096	0.59494	1.34661	-2.23402	-2.58301	-1.96087	0.618271	-1.50629	-0.446091	-0.0409927	-1.42451	4.20355	-1.88432	-0.914879	2.10707		4.32866	-0.0966721	5.37228	-3.97792	0.719349	0.0775414	0.632092	-0.112839	-0.49979	2.35191	-1.02461	0.15704	0.474674	0.80629	0.19733	2.3867	3.41733
	4.3389	0.0557213	-1.21255	0.615921	2.09198	0.282913	-0.216026	-0.43541	-0.932903	-2.62829	-0.148876	-0.774155	-0.987289	-1.67244	-0.713165	-1.36509	-1.3804	0.56546	1.33131	-2.32917	-2.67156	-1.86512	0.590923	-1.50662	-0.441513	0.021759	-1.39009	4.23814	-1.85931	-0.86927	2.25969		4.3389	-0.0486565	5.37637	-3.88533	0.825794	0.0521812	0.769337	-0.0694466	-0.572365	2.36784	-1.02477	0.0862427	0.602287	0.830654	0.0351601	2.35085	3.47625
	4.34914	0.0044632	-1.06178	0.547913	2.17027	0.170414	-0.0743713	-0.511879	-0.874184	-2.67824	-0.11842	-0.657459	-1.00133	-1.67266	-0.783367	-1.35522	-1.24757	0.677925	1.26365	-2.22889	-2.66398	-1.65337	0.504963	-1.46614	-0.418816	0.00537872	-1.27811	4.3504	-1.84473	-0.888069	2.40741		4.34914	-0.0384407	5.30622	-3.88357	0.865002	0.0471153	0.781635	-0.143559	-0.54398	2.33447	-0.996357	0.0849075	0.629967	0.798065	-0.0519218	2.41155	3.47396
	4.35938	-0.0628204	-0.976391	0.53344	2.28697	0.0257034	0.046196	-0.48563	-0.754303	-2.62038	-0.0946236	-0.47662	-0.983044	-1.62096	-0.877792	-1.26414	-1.06637	0.75721	1.22848	-2.20609	-2.73037	-1.61079	0.537899	-1.32323	-0.349937	0.0651016	-1.11517	4.45508	-1.89371	-0.766418	2.50199		4.35938	-0.216789	5.26217	-3.91457	0.847	-0.0848465	0.708145	-0.0239906	-0.667194	2.36335	-0.940128	0.149422	0.687237	0.767452	-0.244015	2.34037	3.50844
	4.36962	-0.0156937	-0.809105	0.405602	2.38013	0.0467567	0.0857162	-0.519867	-0.623856	-2.65755	-0.086113	-0.346931	-0.969418	-1.50375	-1.02407	-1.16548	-1.06018	0.805954	1.22458	-2.28156	-2.7155	-1.48346	0.729317	-1.14963	-0.303589	0.085144	-0.867672	4.40467	-1.95416	-0.661415	2.54579		4.36962	-0.299366	5.15289	-3.93619	1.03498	-0.186378	0.755711	-0.0275688	-0.794464	2.3695	-1.01021	0.169498	0.699062	0.810379	-0.284641	2.32467	3.56029
	4.37986	0.00819397	-0.820526	0.434666	2.41515	0.131935	0.117008	-0.55574	-0.468811	-2.74814	-0.126587	-0.297615	-0.882111	-1.38408	-0.96093	-1.09005	-1.10733	0.918213	1.19697	-2.41014	-2.75233	-1.27747	0.78817	-1.13016	-0.279125	0.18248	-0.602791	4.3386	-2.00746	-0.572067	2.60245		4.37986	-0.314503	4.98399	-3.94831	1.0804	-0.204639	0.679283	-0.0801735	-0.890415	2.41558	-1.1246	0.0901642	0.705524	0.845127	-0.310902	2.28961	3.46871
	4.3901	-0.0247078	-0.833912	0.483696	2.40367	0.0632439	0.205341	-0.694569	-0.37751	-2.79942	-0.124237	-0.297485	-0.806339	-1.22625	-0.928089	-1.10832	-1.18621	0.899807	1.04813	-2.42421	-2.74141	-1.27049	0.802483	-1.12631	-0.129539	0.218002	-0.40184	4.36068	-2.13601	-0.506172	2.6908		4.3901	-0.379486	4.86112	-3.94135	1.17313	-0.296158	0.67815	-0.0258293	-1.01808	2.49895	-1.19117	0.170918	0.687984	0.823895	-0.319344	2.22678	3.3706
	4.40034	-0.0550613	-0.798878	0.4869	2.44759	0.0296173	0.371246	-0.783859	-0.306076	-2.69155	-0.245281	-0.197548	-0.714523	-1.15285	-0.79039	-1.10024	-1.25882	0.895672	0.898949	-2.47631	-2.76217	-1.20387	0.890305	-1.13296	-0.117416	0.309914	-0.275848	4.43228	-2.01407	-0.438171	2.78506		4.40034	-0.312717	4.71685	-4.01732	1.34526	-0.261494	0.676231	0.158207	-1.1332	2.51575	-1.10127	0.128742	0.656921	0.719135	-0.456875	2.22591	3.26832
	4.41058	-0.0242767	-0.853416	0.374191	2.48422	-0.114925	0.346428	-0.895687	-0.346371	-2.59345	-0.314888	-0.129528	-0.723488	-1.18453	-0.77029	-1.15959	-1.17786	0.842537	0.852257	-2.6076	-2.77934	-1.09055	0.918118	-1.12493	-0.0541992	0.311378	-0.130302	4.34212	-1.63255	-0.256973	2.91481		4.41058	-0.252743	4.57025	-3.96445	1.51994	-0.212688	0.607269	0.316483	-1.20574	2.40244	-1.19681	0.200718	0.627785	0.773327	-0.501663	2.25151	3.18121
	4.42082	-0.17173	-0.694855	0.298752	2.62006	-0.182861	0.475174	-0.912781	-0.183235	-2.63311	-0.424774	-0.110134	-0.724335	-1.19513	-0.772175	-1.24696	-1.20028	0.903931	0.862591	-2.62535	-2.83842	-1.01553	0.788239	-1.08506	0.127331	0.274399	0.0527878	4.33607	-1.68642	-0.243996	3.01512		4.42082	-0.369888	4.45536	-3.92824	1.77345	-0.247555	0.607712	0.418537	-1.145	2.38781	-1.215	0.185627	0.694435	0.670033	-0.536793	2.34919	3.04764
	4.43106	-0.0984154	-0.590343	0.347141	2.78863	-0.397369	0.597054	-0.88776	-0.0489197	-2.68545	-0.550755	-0.0904541	-0.731689	-1.266	-0.785431	-1.35824	-1.13865	0.913933	0.87817	-2.53129	-2.87456	-0.812695	0.743797	-0.992523	0.331299	0.238853	0.193695	4.31583	-1.91227	-0.154167	3.16619		4.43106	-0.486835	4.33088	-3.89053	1.92588	-0.279324	0.524433	0.536293	-1.06918	2.45456	-1.19858	0.161964	0.730831	0.59362	-0.610035	2.40615	2.9133
	4.4413	-0.0530319	-0.551113	0.422447	2.89751	-0.471016	0.816017	-0.974174	0.0586319	-2.75838	-0.728355	-0.110527	-0.694283	-1.28791	-0.650627	-1.40456	-1.13369	0.98534	0.880245	-2.54272	-2.89783	-0.64772	0.757698	-1.03429	0.43885	0.345531	0.312477	4.34171	-2.1307	0.00770569	3.34952		4.4413	-0.57283	4.21516	-3.98159	2.17237	-0.280041	0.504833	0.643368	-0.999802	2.61501	-1.19785	0.216122	0.713078	0.511211	-0.646847	2.41466	2.9215
	4.45154	0.0165863	-0.570435	0.389732	2.91266	-0.626011	0.884251	-1.01176	0.0503349	-2.79266	-0.907345	-0.13438	-0.698956	-1.26668	-0.650154	-1.47371	-1.10237	0.973682	0.951889	-2.52862	-2.89212	-0.594028	0.789398	-0.969204	0.632614	0.390034	0.510685	4.28739	-2.21885	0.137821	3.52362		4.45154	-0.665623	4.06093	-4.12247	2.36865	-0.331253	0.485832	0.775272	-0.863213	2.71917	-1.19198	0.120193	0.872143	0.519032	-0.631756	2.40691	2.84297
	4.46178	0.0499878	-0.472389	0.301613	3.00074	-0.648247	1.00433	-1.18572	0.0592995	-2.87894	-0.9757	-0.186821	-0.760612	-1.12456	-0.691483	-1.48362	-1.05778	1.07338	0.934795	-2.56775	-2.94154	-0.462719	0.849083	-0.840508	0.890079	0.404922	0.648361	4.16601	-2.40268	0.219398	3.73896		4.46178	-0.650661	3.91466	-4.12777	2.61699	-0.350983	0.416893	0.825016	-0.752014	2.64671	-1.11968	0.128407	1.02231	0.517231	-0.580544	2.41532	2.72732
	4.47202	0.0246429	-0.416023	0.284782	3.00501	-0.666901	1.01872	-1.24759	0.103729	-2.83537	-0.911518	-0.196907	-0.840469	-1.10286	-0.710365	-1.49145	-0.966011	1.15694	0.783615	-2.65574	-3.01665	-0.282497	0.83136	-0.803528	1.08799	0.37059	0.712757	4.09007	-2.48366	0.275101	3.93612		4.47202	-0.513298	3.66301	-4.18659	2.78981	-0.443012	0.433903	0.861187	-0.807888	2.62305	-1.19186	0.253483	1.10563	0.5714	-0.686855	2.36911	2.56546
	4.48226	0.0493202	-0.458248	0.293877	3.03381	-0.808258	1.03872	-1.29881	0.219383	-2.78413	-1.00476	-0.170681	-0.837608	-1.04276	-0.736412	-1.43141	-0.914833	1.17579	0.603012	-2.59683	-3.05083	-0.239475	0.906101	-0.676117	1.17655	0.383881	0.842766	4.13626	-2.68916	0.429253	4.11158		4.48226	-0.503056	3.44014	-4.21744	2.99352	-0.397594	0.480217	0.992397	-0.72921	2.59887	-1.22731	0.352688	1.19091	0.534351	-0.638859	2.43102	2.51619
	4.4925	-0.0112991	-0.52256	0.248531	3.12701	-1.04696	1.06751	-1.42648	0.372807	-2.68696	-1.07696	-0.0669785	-0.77562	-0.976273	-0.783928	-1.38561	-0.881432	1.10457	0.487389	-2.49365	-3.05291	-0.180206	0.960579	-0.672516	1.25014	0.436562	0.949554	4.08784	-2.72911	0.565948	4.28276		4.4925	-0.45232	3.27935	-4.27922	3.09851	-0.295933	0.431553	1.14297	-0.681004	2.5696	-1.21884	0.35252	1.27862	0.538952	-0.706451	2.46934	2.36662
	4.50274	-0.0100479	-0.481445	0.152962	3.20364	-1.18172	1.11959	-1.43959	0.475601	-2.71251	-1.1309	-0.0118332	-0.778194	-1.05604	-0.787781	-1.39291	-0.91016	1.15877	0.497356	-2.5027	-2.99427	-0.153862	0.942055	-0.70116	1.23834	0.527588	1.16417	4.07774	-2.64639	0.680187	4.44992		4.50274	-0.429256	3.16073	-4.33322	3.16939	-0.201138	0.389893	1.34215	-0.618095	2.63977	-1.28411	0.392227	1.35116	0.496464	-0.646908	2.37465	2.21501
	4.51298	-0.0580635	-0.479431	0.0906601	3.29234	-1.20289	1.12558	-1.50237	0.504402	-2.70009	-1.15641	0.0658798	-0.744171	-1.05362	-0.768383	-1.43513	-0.911575	1.13554	0.468864	-2.40922	-2.94732	-0.0402641	0.959805	-0.700459	1.31542	0.582054	1.38613	4.01446	-2.67986	0.810005	4.62451		4.51298	-0.438934	2.90814	-4.29939	3.34803	-0.242275	0.277214	1.38394	-0.490063	2.80728	-1.42426	0.543625	1.40646	0.627834	-0.633354	2.26966	2.12538
	4.52322	0.0143814	-0.471767	-0.0388336	3.33067	-1.22164	1.14434	-1.57121	0.499107	-2.75905	-1.33376	0.130634	-0.713036	-0.934429	-0.844711	-1.44006	-0.917812	1.06844	0.357941	-2.47184	-3.03187	0.0743675	0.955849	-0.707443	1.45991	0.469032	1.57755	3.98463	-2.76237	0.799099	4.81103		4.52322	-0.46262	2.61678	-4.15065	3.47193	-0.259968	0.156872	1.55931	-0.467487	2.92769	-1.52409	0.447327	1.51839	0.746281	-0.696415	2.28818	2.03692
	4.53346	0.122314	-0.46949	-0.0578842	3.30397	-1.24253	1.33683	-1.57808	0.495331	-2.74916	-1.36747	0.144913	-0.75304	-0.899048	-0.797268	-1.40085	-0.86269	0.89592	0.22221	-2.6177	-3.14011	0.232212	0.932076	-0.69165	1.50749	0.47596	1.60809	4.04051	-2.86724	0.79998	4.96161		4.53346	-0.417049	2.41458	-4.06029	3.45745	-0.183243	0.0713882	1.73967	-0.532074	2.94961	-1.63868	0.431805	1.5555	0.820572	-0.72456	2.32868	1.89118
	4.5437	0.185661	-0.455067	-0.193535	3.29118	-1.34339	1.37656	-1.6504	0.470428	-2.74097	-1.47462	0.0783005	-0.805672	-0.933464	-0.862499	-1.53394	-0.703259	0.868752	0.131859	-2.72012	-3.25407	0.31958	0.969784	-0.694866	1.64241	0.513103	1.64067	4.01336	-2.86047	0.85117	5.10619		4.5437	-0.332195	2.18709	-4.06337	3.53778	-0.18832	0.03088	1.93328	-0.462048	2.95452	-1.65123	0.396866	1.47237	0.811417	-0.705151	2.41727	1.86672
	4.55394	0.275497	-0.383041	-0.292511	3.32134	-1.34263	1.60962	-1.69637	0.420265	-2.83223	-1.54885	-0.0737038	-0.864632	-0.871025	-0.892422	-1.67334	-0.706097	0.936726	0.127678	-2.77914	-3.4416	0.287094	1.08081	-0.714859	1.79531	0.487007	1.73346	3.87516	-2.86375	0.873951	5.21528		4.55394	-0.190479	1.99554	-4.05191	3.7291	-0.289257	0.0243111	2.17616	-0.370724	2.89298	-1.66267	0.33675	1.56763	0.787441	-0.708073	2.42206	1.72172
	4.56418	0.31144	-0.337883	-0.357647	3.32915	-1.39928	1.69857	-1.93945	0.414173	-2.91623	-1.71413	-0.192017	-0.91116	-0.933155	-0.992592	-1.73561	-0.795647	0.977722	0.0464935	-2.78263	-3.50593	0.376492	1.15006	-0.708744	1.94173	0.384666	1.9112	3.73655	-2.7765	0.822918	5.40697		4.56418	-0.108608	1.85532	-4.10841	3.94772	-0.32906	-0.0610886	2.41655	-0.297077	2.86654	-1.65937	0.419838	1.44756	0.861019	-0.674351	2.49369	1.57113
	4.57442	0.44215	-0.335331	-0.310417	3.37557	-1.47958	1.74476	-2.10791	0.482323	-3.00219	-1.89288	-0.251244	-0.897488	-0.938042	-0.948544	-1.70532	-0.895149	0.933388	-0.0101547	-2.81821	-3.52717	0.307335	1.21234	-0.716431	1.95086	0.457184	2.05526	3.70998	-2.8655	0.736572	5.36243		4.57442	-0.00355911	1.76652	-4.22835	4.09599	-0.317795	-0.216228	2.44323	-0.28587	2.82869	-1.78753	0.406185	1.47708	0.895481	-0.61409	2.42807	1.49699
	4.58466	0.506191	-0.413773	-0.455101	3.36806	-1.69351	1.83375	-2.17089	0.475018	-2.8747	-2.02811	-0.341805	-0.781223	-0.918526	-0.960861	-1.76778	-0.96714	0.869099	0.0332642	-2.81165	-3.52911	0.37804	1.26379	-0.728546	2.06828	0.485939	2.08479	3.58958	-2.83696	0.750259	5.50629		4.58466	0.0311432	1.51749	-4.27055	4.23786	-0.265427	-0.315937	2.59114	-0.307888	2.76075	-1.96416	0.45858	1.56245	0.933475	-0.6185	2.3213	1.41882
	4.5949	0.495247	-0.261185	-0.527618	3.3163	-1.77183	1.86853	-2.34869	0.537292	-2.83731	-2.10481	-0.48085	-0.772091	-0.941845	-0.914894	-1.67139	-0.982903	0.849621	0.0413437	-2.85154	-3.41208	0.402084	1.25214	-0.628815	2.18079	0.56831	2.13824	3.46622	-2.92214	0.818306	5.67011		4.5949	0.0707817	1.32008	-4.31802	4.30112	-0.266678	-0.318199	2.75443	-0.260109	2.69197	-2.09177	0.533932	1.53804	0.875263	-0.646847	2.15255	1.28492
	4.60514	0.413494	-0.178131	-0.614876	3.34958	-1.82566	1.84305	-2.44115	0.595535	-2.93425	-2.17323	-0.610348	-0.803299	-1.01772	-0.87368	-1.68493	-0.84407	0.790421	0.0753441	-2.80161	-3.36849	0.381714	1.16219	-0.584183	2.34689	0.641518	2.23878	3.39427	-2.92202	0.840706	5.73338		4.60514	0.191456	1.02811	-4.43705	4.51205	-0.272556	-0.340229	2.98292	-0.182995	2.68116	-2.13667	0.564877	1.6251	0.830429	-0.564892	1.99447	1.13513
	4.61538	0.354889	-0.126072	-0.588043	3.33281	-1.943	1.86893	-2.53465	0.539391	-3.14525	-2.24337	-0.660797	-0.897369	-1.00004	-0.681492	-1.76651	-0.779686	0.705555	0.0955734	-2.82392	-3.46494	0.4244	1.15057	-0.517982	2.31387	0.679749	2.33506	3.24416	-2.91338	0.840691	5.77026		4.61538	0.403839	0.827023	-4.37988	4.60413	-0.372093	-0.33215	3.21557	-0.048275	2.67358	-2.04406	0.536343	1.59103	0.922886	-0.555737	2.04286	0.96207
	4.62562	0.362434	0.0355759	-0.649807	3.39779	-2.03598	1.92065	-2.59824	0.470272	-3.09549	-2.38413	-0.685139	-0.978348	-0.976608	-0.635429	-1.89207	-0.740479	0.634804	0.116997	-2.80153	-3.47581	0.444607	1.10474	-0.454815	2.37556	0.803749	2.30822	3.19195	-2.98816	0.744419	5.76598		4.62562	0.598377	0.6782	-4.29322	4.64421	-0.468403	-0.416237	3.32758	0.0738106	2.66252	-1.96108	0.476341	1.63659	1.04613	-0.450962	2.12944	0.881557
	4.63586	0.355461	0.0549355	-0.742599	3.34338	-2.10852	2.00146	-2.65339	0.312103	-3.00853	-2.43312	-0.769875	-1.05672	-1.00446	-0.638397	-2.02612	-0.709755	0.652748	0.136368	-2.78152	-3.40787	0.514763	1.20945	-0.340553	2.43547	0.816231	2.29807	3.04637	-3.09642	0.745071	5.88841		4.63586	0.74741	0.483814	-4.31781	4.75023	-0.564579	-0.669247	3.47021	0.0810432	2.70621	-2.01594	0.34346	1.55386	1.04489	-0.468128	2.07605	0.831333
	4.6461	0.381042	0.125126	-0.824127	3.39687	-2.24302	1.96452	-2.79446	0.271622	-2.9695	-2.40884	-0.793453	-1.12161	-0.992115	-0.52869	-2.05909	-0.561996	0.668457	0.00185394	-2.72798	-3.38658	0.518314	1.40101	-0.222809	2.53873	0.830406	2.36488	2.99217	-3.1473	0.676613	5.9945		4.6461	0.794811	0.315613	-4.41355	4.86392	-0.646358	-0.802738	3.70575	0.0831642	2.62554	-1.98633	0.22065	1.5212	1.09475	-0.488895	1.81057	0.659672
	4.65634	0.3097	0.188881	-0.956425	3.4086	-2.38489	1.88074	-2.85051	0.140743	-2.90205	-2.42235	-0.818558	-1.12018	-1.01982	-0.516815	-2.1435	-0.613159	0.755112	0.037281	-2.78658	-3.36327	0.548916	1.38469	-0.164875	2.56778	0.791504	2.38467	2.87335	-3.09505	0.583687	6.08361		4.65634	1.00573	0.124149	-4.38852	4.99554	-0.73399	-0.879246	3.88317	0.116199	2.57983	-1.92991	0.00518036	1.57004	1.09046	-0.542255	1.65098	0.447567
	4.66658	0.35136	0.220577	-1.031	3.32912	-2.56165	1.95086	-2.86548	0.0623245	-2.92954	-2.37917	-0.858948	-1.04847	-0.974022	-0.561577	-2.2366	-0.549408	0.782185	0.0141296	-2.90466	-3.38809	0.576248	1.2285	-0.157639	2.59555	0.703697	2.30112	2.78139	-3.08742	0.463562	6.05753		4.66658	1.13733	-0.0346489	-4.37556	5.01151	-0.77166	-0.959259	4.04207	0.187794	2.43582	-1.83759	-0.0433998	1.53189	1.1412	-0.639576	1.5508	0.241596
	4.67682	0.455048	0.274281	-0.917847	3.24574	-2.60139	2.0737	-2.91344	-0.036377	-2.91878	-2.35574	-0.952633	-1.0844	-1.0501	-0.50536	-2.39427	-0.494965	0.723866	0.026432	-2.9133	-3.45205	0.546257	1.11295	-0.0957947	2.66955	0.58741	2.48764	2.62168	-3.03647	0.43042	6.10366		4.67682	1.38338	-0.249653	-4.45546	4.98354	-0.828011	-1.03311	4.22093	0.258343	2.31221	-1.87648	-0.0760727	1.40799	1.19744	-0.525982	1.55307	0.102753
	4.68706	0.47541	0.399094	-0.860649	3.15054	-2.62479	2.07274	-3.05479	-0.0297165	-2.89088	-2.31897	-1.08283	-1.09164	-1.08665	-0.311432	-2.42696	-0.378738	0.670105	0.116043	-2.84151	-3.4378	0.590233	1.07266	-0.0210342	2.74284	0.582817	2.58303	2.54751	-2.98083	0.42886	6.10241		4.68706	1.56142	-0.364765	-4.3958	4.92069	-0.73418	-1.01217	4.2477	0.190681	2.22358	-1.82953	-0.117702	1.24812	1.26161	-0.498909	1.44358	-0.0222626
	4.6973	0.338905	0.553696	-0.994057	3.23375	-2.65298	1.92377	-3.12897	-0.0275574	-2.99105	-2.37288	-1.13396	-1.0287	-0.937183	-0.074276	-2.32696	-0.427254	0.584904	0.290817	-2.83773	-3.42131	0.60313	0.976616	0.0386734	2.72079	0.680603	2.5859	2.50834	-2.96573	0.462322	6.07632		4.6973	1.6452	-0.446373	-4.29443	4.83264	-0.830048	-0.902969	4.32339	0.225979	2.08331	-1.96797	-0.136608	1.17951	1.31028	-0.491909	1.1931	-0.141651
	4.70754	0.280693	0.667599	-1.04443	3.195	-2.74152	1.88027	-3.10695	-0.191612	-3.20461	-2.40628	-1.29829	-1.0071	-0.861557	0.0156212	-2.32491	-0.395065	0.496071	0.407913	-2.77715	-3.35516	0.715714	0.935402	0.0219269	2.7196	0.775352	2.673	2.34923	-3.02915	0.372581	6.03171		4.70754	1.76385	-0.621792	-4.32338	4.89562	-1.02844	-1.00975	4.36136	0.178604	1.99483	-2.10944	-0.0661545	1.16806	1.19082	-0.593513	1.06439	-0.176186
	4.71778	0.230354	0.818588	-1.14883	3.12971	-2.73794	1.81857	-3.16159	-0.334557	-3.32701	-2.37447	-1.28831	-1.08234	-0.69812	0.131287	-2.38989	-0.360153	0.482132	0.495781	-2.71005	-3.30728	0.832123	0.876289	0.116959	2.68119	0.760178	2.61386	2.28839	-3.01169	0.453941	6.10576		4.71778	2.00136	-0.844761	-4.42396	4.86634	-1.17997	-1.07365	4.33058	0.0605392	1.76585	-2.19133	-0.0871124	1.12677	1.30134	-0.701767	0.861412	-0.347191
	4.72802	0.238411	0.967926	-1.20718	2.9843	-2.73351	1.82399	-3.14433	-0.424774	-3.24593	-2.3876	-1.40494	-1.15751	-0.649902	0.226799	-2.44221	-0.281818	0.52356	0.518936	-2.71102	-3.29637	0.932838	0.84602	0.139587	2.64364	0.830414	2.69959	2.27981	-2.96036	0.446457	6.07695		4.72802	2.22187	-1.06587	-4.58569	4.81628	-1.19882	-1.1842	4.29067	0.100666	1.57242	-2.29384	-0.232014	1.0817	1.41472	-0.785477	0.720516	-0.456005
	4.73827	0.186806	1.08796	-1.21777	2.9715	-2.76582	1.9012	-3.11494	-0.427872	-3.22279	-2.35145	-1.51326	-1.22143	-0.624664	0.229019	-2.51218	-0.223778	0.44648	0.45237	-2.74873	-3.21243	1.07779	0.845284	0.130135	2.57703	0.878433	2.70093	2.12372	-2.89639	0.507908	6.0314		4.73827	2.26962	-1.2476	-4.6136	4.71269	-1.21297	-1.23798	4.36339	0.177425	1.47937	-2.3657	-0.272007	0.950619	1.50177	-0.75745	0.738422	-0.706394
	4.74851	0.198845	1.23865	-1.21871	2.99029	-2.80144	1.93299	-3.1196	-0.437576	-3.07993	-2.29842	-1.52056	-1.22435	-0.660393	0.3881	-2.50985	-0.151306	0.300163	0.371124	-2.74834	-3.12729	1.10796	0.842884	0.0558319	2.52782	0.937	2.62962	1.97866	-2.84166	0.520615	6.08403		4.74851	2.44605	-1.35089	-4.56653	4.54808	-1.34023	-1.36683	4.43541	0.17281	1.46548	-2.38785	-0.237782	0.894161	1.44355	-0.781387	0.628368	-0.865501
	4.75875	0.135998	1.40556	-1.41143	3.04644	-2.75374	2.00211	-3.12976	-0.558945	-2.97923	-2.2832	-1.51144	-1.16747	-0.658829	0.551025	-2.50537	-0.0619736	0.261894	0.27832	-2.74814	-3.00017	1.11156	0.883713	0.0375443	2.4887	0.959351	2.49433	1.93506	-2.88924	0.484222	6.09916		4.75875	2.66263	-1.40507	-4.50805	4.46073	-1.30037	-1.37498	4.47752	0.0428848	1.31646	-2.4837	-0.211147	0.901955	1.44741	-0.800102	0.460403	-0.956841
	4.76898	0.158836	1.46852	-1.43165	3.02582	-2.77257	2.1146	-3.18471	-0.507233	-2.94711	-2.27065	-1.50252	-1.1413	-0.594326	0.562565	-2.4952	0.0188026	0.310425	0.315994	-2.81263	-3.04491	1.17885	0.83168	0.10392	2.44339	0.91806	2.50292	1.99558	-2.77531	0.350597	6.12297		4.76898	2.75305	-1.35928	-4.43917	4.39413	-0.897438	-1.43322	4.44002	-0.0350075	1.19013	-2.59741	-0.222427	0.855808	1.43191	-0.980274	0.249866	-1.08174
	4.77922	0.193848	1.54494	-1.41628	3.16397	-2.86974	2.15446	-3.31455	-0.622627	-2.92566	-2.38579	-1.5365	-1.23572	-0.607071	0.633698	-2.59988	0.266602	0.387028	0.42347	-2.83478	-2.90234	1.13818	0.811604	0.24057	2.38842	0.858826	2.4992	1.96075	-2.81164	0.285378	6.11701		4.77922	2.83432	-1.53762	-4.34516	4.36552	-0.875835	-1.4824	4.62685	-0.11322	1.19263	-2.4898	-0.267834	0.880032	1.44636	-0.955585	0.0578804	-1.14103
	4.78946	0.189297	1.66247	-1.40025	3.13818	-2.833	2.04236	-3.43345	-0.649033	-2.94469	-2.3036	-1.55749	-1.30465	-0.629005	0.742916	-2.56531	0.442665	0.462715	0.423386	-2.78153	-2.78029	1.14165	0.787571	0.408806	2.35336	0.854652	2.54406	1.7655	-2.8036	0.416031	6.15958		4.78946	2.95394	-1.59451	-4.46182	4.23308	-1.03378	-1.50606	4.67128	-0.233288	1.18736	-2.63597	-0.312382	0.874214	1.44185	-1.00451	-0.0252419	-1.26015
	4.79971	0.231689	1.68213	-1.31849	3.13404	-2.86178	2.05241	-3.4439	-0.714622	-3.02566	-2.20491	-1.63839	-0.812752	-0.543434	0.996841	-2.50364	0.582973	0.610355	0.533264	-2.5917	-2.74392	1.08523	0.764351	0.580292	2.23273	0.728111	2.49632	1.73163	-2.81769	0.532288	6.10682		4.79971	3.0567	-1.73478	-4.43016	4.1184	-1.28901	-1.51599	4.73633	-0.231869	1.14009	-2.66251	-0.249119	0.766392	1.41833	-1.08003	-0.0834312	-1.29643
	4.80995	0.238922	1.72015	-1.30396	3.19497	-2.86987	1.99771	-3.45448	-0.892899	-3.04944	-2.10072	-1.71765	-0.678406	-0.485775	1.24814	-2.48499	0.663345	0.615231	0.58363	-2.56033	-2.67994	1.1288	0.798027	0.652115	2.23015	0.71241	2.44106	1.66352	-2.74301	0.686806	6.16047		4.80995	3.12788	-1.75486	-4.59959	4.0172	-1.41542	-1.50123	4.71821	-0.21109	1.02272	-2.71877	-0.281734	0.750347	1.40873	-1.13656	-0.158424	-1.42521
	4.82019	0.222244	1.78572	-1.35265	3.26724	-2.89063	2.07114	-3.46477	-0.943264	-3.05292	-1.97581	-1.80971	-0.82304	-0.564049	1.43735	-2.4447	0.838928	0.554291	0.660042	-2.61494	-2.59208	1.1853	0.687794	0.649433	2.29773	0.822891	2.31617	1.67405	-2.74977	0.717381	6.21651		4.82019	3.19007	-1.86791	-4.69046	3.89472	-1.41909	-1.4851	4.63323	-0.145802	0.96994	-2.8145	-0.253792	0.757675	1.4654	-1.22035	-0.255459	-1.45506
	4.83043	0.282841	1.85709	-1.47784	3.27277	-2.8508	2.03748	-3.44417	-0.9953	-3.03706	-1.89955	-1.78065	-0.963993	-0.642532	1.5484	-2.3684	0.898056	0.577133	0.735977	-2.70026	-2.46806	1.2831	0.658302	0.827507	2.31096	0.839714	2.2592	1.69466	-2.73475	0.786438	6.11676		4.83043	3.17395	-2.01097	-4.77167	3.75687	-1.40515	-1.51326	4.56702	-0.167221	0.905781	-2.95151	-0.293976	0.694592	1.5266	-1.24449	-0.430294	-1.4737
	4.84067	0.220387	1.89558	-1.46787	3.13655	-2.80236	2.10999	-3.48145	-0.915737	-2.96989	-1.77742	-1.68391	-0.994106	-0.614677	1.65793	-2.30232	0.979843	0.628166	0.974445	-2.70912	-2.34178	1.35014	0.649323	0.993256	2.35876	0.876812	2.19757	1.63283	-2.73344	0.869385	6.04134		4.84067	3.15347	-2.12887	-4.65347	3.52917	-1.44327	-1.59	4.58479	-0.310272	0.763256	-2.98969	-0.277981	0.613888	1.51187	-1.33305	-0.528973	-1.46321
	4.85091	0.153809	1.90808	-1.49842	3.06059	-2.69614	2.14686	-3.59598	-0.975273	-2.8696	-1.71149	-1.65418	-1.05192	-0.678547	1.84143	-2.25729	1.16731	0.661713	1.01752	-2.59435	-2.06203	1.46852	0.618153	1.20539	2.445	1.04007	2.12454	1.4941	-2.73326	0.990467	6.01822		4.85091	3.1046	-2.13361	-4.61589	3.35567	-1.46233	-1.51774	4.61332	-0.37431	0.617138	-3.00842	-0.252422	0.554531	1.53219	-1.35896	-0.538795	-1.46757
	4.86115	0.214367	1.87061	-1.34885	3.06917	-2.57955	2.13876	-3.60638	-0.981541	-2.85537	-1.72078	-1.6722	-0.908775	-0.597305	1.94221	-2.19302	1.41264	0.693409	1.08992	-2.38615	-2.01479	1.54547	0.465015	1.37408	2.44768	1.16919	2.08406	1.50698	-2.56781	1.10481	5.95743		4.86115	3.10709	-2.22806	-4.65413	3.18386	-1.48781	-1.4541	4.6638	-0.380474	0.472015	-3.04133	-0.175922	0.435322	1.53283	-1.31909	-0.651829	-1.38057
	4.87139	0.293793	1.87248	-1.23826	3.12468	-2.56081	2.2797	-3.52728	-1.09751	-2.7854	-1.71249	-1.72403	-0.753994	-0.516388	1.97779	-2.01294	1.52812	0.774055	1.16373	-2.27874	-1.77956	1.66667	0.334038	1.41038	2.41255	1.13999	2.0365	1.45271	-2.58127	1.21156	5.88206		4.87139	3.14851	-2.21413	-4.67034	2.9973	-1.49383	-1.36566	4.58533	-0.370808	0.443058	-3.22784	-0.241001	0.317616	1.57165	-1.30912	-0.704437	-1.33769
	4.88163	0.317863	1.95277	-1.09576	3.03033	-2.65654	2.2225	-3.53881	-1.14553	-2.72542	-1.70359	-1.71029	-0.73101	-0.421307	2.03839	-1.94868	1.5922	0.806728	1.30866	-2.20413	-1.63444	1.74301	0.195866	1.41544	2.36017	1.06517	2.01549	1.39735	-2.5631	1.31278	5.93632		4.88163	3.1374	-2.29359	-4.72161	2.70984	-1.4142	-1.39291	4.51793	-0.462788	0.417309	-3.37628	-0.406319	0.167461	1.45766	-1.20521	-0.898167	-1.36526
	4.89187	0.422874	1.94463	-1.03068	3.04442	-2.65503	2.20625	-3.56029	-1.14865	-2.75465	-1.63233	-1.62042	-0.7145	-0.356934	2.12398	-1.87338	1.88096	0.785774	1.4794	-2.08023	-1.46451	1.82931	0.205032	1.53904	2.37104	1.00085	2.03182	1.30258	-2.55219	1.41827	5.83606		4.89187	3.10672	-2.40911	-4.57385	2.5657	-1.22673	-1.29617	4.58445	-0.457531	0.318604	-3.45298	-0.551685	-0.0395699	1.37927	-1.22427	-0.929348	-1.40789
	4.90211	0.464882	2.02215	-0.943539	3.03916	-2.57258	2.2213	-3.56123	-1.18291	-2.79546	-1.47215	-1.41441	-0.788971	-0.252075	2.34991	-1.80671	2.19564	0.93681	1.45424	-2.0552	-1.25254	1.93234	0.243931	1.6828	2.4416	1.00199	2.11412	1.30997	-2.49781	1.54101	5.76731		4.90211	2.93234	-2.48898	-4.46635	2.51227	-1.36226	-1.24626	4.62457	-0.456135	0.199585	-3.41732	-0.591846	-0.220211	1.30577	-1.29607	-1.04734	-1.54192
	4.91235	0.49942	2.12671	-0.774761	3.08195	-2.516	2.46923	-3.57346	-1.09421	-2.8043	-1.39243	-1.46198	-0.758667	-0.142807	2.57531	-1.68137	2.42789	1.01068	1.43532	-1.90536	-0.863644	2.04626	0.210075	1.94589	2.58036	1.00797	2.08682	1.30784	-2.37207	1.77938	5.67493		4.91235	2.8148	-2.53498	-4.40968	2.36872	-1.36654	-1.20701	4.63892	-0.500553	0.190811	-3.43137	-0.610432	-0.291294	1.20614	-1.46754	-1.25396	-1.67286
	4.92259	0.613884	2.04717	-0.616833	3.0904	-2.40514	2.54192	-3.51688	-1.12204	-2.82015	-1.22863	-1.40148	-0.796146	-0.0750504	2.82948	-1.58277	2.59435	1.13032	1.50202	-1.7981	-0.558289	2.17504	0.251179	2.14468	2.74574	1.00203	2.21038	1.39615	-2.39135	1.91342	5.66342		4.92259	2.84075	-2.42819	-4.47869	2.20693	-1.38925	-1.25502	4.56961	-0.618881	0.290104	-3.39417	-0.640675	-0.286919	1.15995	-1.60254	-1.43209	-1.73188
	4.93283	0.746708	2.04597	-0.51931	3.15006	-2.287	2.67003	-3.43	-1.0778	-2.82341	-1.1687	-1.37286	-0.689514	0.00397491	2.9965	-1.54986	2.7793	1.23381	1.49979	-1.64166	-0.269386	2.28955	0.336975	2.23909	2.83833	1.07228	2.20812	1.33553	-2.39079	2.03154	5.68335		4.93283	2.77734	-2.41177	-4.47518	1.98349	-1.34134	-1.20362	4.45055	-0.675838	0.365692	-3.3395	-0.621052	-0.322468	1.20351	-1.56034	-1.58424	-1.70949
	4.94307	0.753075	2.03165	-0.234756	3.18765	-2.09111	2.79117	-3.31931	-1.06634	-2.75211	-1.01768	-1.28954	-0.667534	0.0215454	3.03204	-1.43501	2.98392	1.33528	1.56749	-1.45087	0.0682373	2.41311	0.308826	2.33014	2.96308	1.17332	2.30959	1.3275	-2.38447	2.26826	5.65572		4.94307	2.79446	-2.42506	-4.42166	1.74423	-1.35242	-1.1676	4.35188	-0.74733	0.419312	-3.16191	-0.548798	-0.348251	1.16659	-1.58272	-1.71015	-1.54692
	4.95331	0.799065	2.05357	-0.0180817	3.20291	-1.86689	2.93475	-3.26134	-0.96627	-2.65527	-0.889942	-1.15639	-0.489052	-0.0199394	3.20612	-1.23758	3.14301	1.38198	1.60897	-1.18447	0.470654	2.68143	0.363792	2.52891	3.07248	1.29218	2.25018	1.46755	-2.2656	2.52923	5.69502		4.95331	2.71314	-2.56274	-4.34168	1.63607	-1.49819	-1.05848	4.26607	-0.756519	0.33757	-3.19312	-0.463291	-0.427979	0.999493	-1.5798	-1.69273	-1.42903
	4.96355	0.941078	2.29885	0.300735	3.33653	-1.61507	3.04722	-3.17708	-0.902863	-2.69461	-0.848709	-1.04814	-0.323185	0.0668335	3.36093	-1.03514	3.4225	1.51048	1.81659	-0.83812	0.898224	2.85703	0.468163	2.80961	3.21885	1.32632	2.21217	1.51453	-2.23165	2.72562	5.64894		4.96355	2.57669	-2.69542	-4.27249	1.56762	-1.46162	-0.960941	4.27392	-0.908573	0.269405	-3.11902	-0.423435	-0.622719	0.877815	-1.58034	-1.72277	-1.333
	4.97379	1.16145	2.54287	0.413208	3.39577	-1.34863	3.1628	-3.05985	-0.815781	-2.60173	-0.615807	-0.809212	-0.0982361	0.174393	3.74445	-0.744492	3.52711	1.67072	2.03045	-0.537666	1.15089	3.06186	0.55851	3.03203	3.43214	1.38934	2.19836	1.59988	-2.03044	2.90239	5.59715		4.97379	2.54448	-2.78424	-4.21063	1.50223	-1.34252	-0.84618	4.24337	-1.09974	0.186436	-3.10804	-0.490467	-0.688999	0.879532	-1.55762	-1.63871	-1.3236
	4.98403	1.38343	2.74318	0.696724	3.44683	-1.1113	3.4351	-2.91873	-0.64579	-2.32002	-0.391182	-0.521156	0.1231	0.325912	3.9268	-0.411255	3.70593	1.85618	2.18891	-0.269482	1.50406	3.27719	0.644413	3.2631	3.62813	1.60948	2.2862	1.77973	-1.95163	3.10606	5.64324		4.98403	2.42171	-2.74332	-4.07407	1.31773	-1.33356	-0.690777	4.25358	-1.22409	0.197773	-3.1381	-0.505596	-0.800449	0.870686	-1.56353	-1.65668	-1.32744
	4.99427	1.58102	3.0221	0.94915	3.58788	-0.874947	3.50788	-2.38535	-0.470024	-2.17025	-0.108849	-0.380882	0.189751	0.496628	4.16124	-0.112114	3.90746	2.03616	2.31507	-0.089119	1.84918	3.51662	0.886383	3.51418	3.81812	1.75322	2.50367	1.83763	-1.86963	3.23282	5.76101		4.99427	2.374	-2.75832	-4.0955	1.27964	-1.48198	-0.616867	4.26238	-1.38946	0.230186	-3.23934	-0.501793	-0.844818	0.833469	-1.56789	-1.71561	-1.21912
	5.00451	1.76855	3.36861	1.26639	3.7065	-0.672012	3.57267	-2.10093	-0.273834	-1.98484	0.145081	-0.199158	0.347702	0.603836	4.32688	0.0854034	4.3027	2.33268	2.42114	0.171822	2.27323	3.64938	1.10073	3.79936	4.02041	1.90985	2.59563	1.89528	-1.79675	3.42104	5.85122		5.00451	2.33459	-2.76844	-4.09849	1.21637	-1.50937	-0.532074	4.26591	-1.48479	0.109669	-3.26056	-0.55508	-0.913292	0.820107	-1.58629	-1.78487	-1.02926
	5.01475	1.98257	3.48585	1.48782	3.81457	-0.338921	3.69067	-1.95322	-0.079258	-1.78724	0.274494	-0.00751877	0.611557	0.822777	4.71925	0.339787	4.70471	2.63512	2.48851	0.529579	2.7656	3.69003	1.24032	4.11951	4.25768	2.05235	2.7489	2.02506	-1.66961	3.62177	6.11036		5.01475	2.22783	-2.74601	-3.91435	1.20065	-1.48477	-0.46999	4.18622	-1.63605	-0.0387726	-3.25517	-0.652332	-1.14784	0.693851	-1.58526	-1.92438	-0.922771
	5.02499	2.27496	3.70844	1.65366	3.94154	-0.00569534	3.92012	-1.86295	0.240295	-1.51813	0.545494	0.250069	0.819534	1.21128	4.96452	0.7561	5.07917	2.81146	2.78497	0.937157	3.11256	3.87954	1.41403	4.3978	4.56261	2.32291	2.85199	2.08645	-1.47732	3.88922	6.42618		5.02499	2.10404	-2.67591	-3.81063	1.19222	-1.38517	-0.455124	4.01534	-1.81847	-0.215752	-3.35299	-0.66193	-1.37991	0.536137	-1.6705	-1.91516	-0.779613
	5.03523	2.5022	4.14873	2.05415	4.04978	0.334171	4.14021	-1.82851	0.476746	-1.17489	0.774399	0.445835	1.04551	1.47438	5.16067	1.10612	5.4482	3.03534	3.18295	1.42852	3.59319	4.16042	1.55116	4.64629	4.78536	2.50479	3.01522	2.18773	-1.23858	4.21231	6.65287		5.03523	1.91195	-2.63195	-3.62511	1.13131	-1.2509	-0.346035	3.81423	-1.79128	-0.329655	-3.40708	-0.628551	-1.45126	0.378124	-1.62932	-1.84072	-0.712399
	5.04547	2.72655	4.66679	2.36765	4.23243	0.77813	4.33114	-1.73048	0.773148	-0.83712	1.05775	0.69416	1.28217	1.72343	5.52259	1.44383	5.8508	3.22149	3.33491	1.93673	4.04667	4.36185	1.83449	4.97811	5.05847	2.72693	3.21191	2.25815	-0.985283	4.58027	6.93788		5.04547	1.7522	-2.58607	-3.5938	1.08278	-1.26532	-0.228828	3.65244	-1.91087	-0.394039	-3.30754	-0.539761	-1.60124	0.410847	-1.6082	-1.78835	-0.554211
	5.05571	2.89154	5.01695	2.73549	4.47853	1.13528	4.52799	-1.60753	1.00468	-0.500053	1.49453	1.02708	1.49067	2.02374	5.80286	1.81448	6.22696	3.4472	3.52762	2.3849	4.55735	4.63157	2.15046	5.26702	5.25831	3.10296	3.35918	2.54244	-0.644871	4.97198	7.17959		5.05571	1.65111	-2.50565	-3.58011	1.0464	-1.23806	-0.0609093	3.49299	-1.95308	-0.413601	-3.22331	-0.559479	-1.6734	0.30859	-1.61913	-1.82553	-0.48278
	5.06595	3.13855	5.31376	3.0687	4.70399	1.48193	4.76355	-1.48386	1.51254	-0.264488	1.90815	1.42467	1.7914	2.31296	6.03774	2.35003	6.62932	3.67022	3.91225	2.94568	5.23532	4.94285	2.49348	5.60641	5.49232	3.46967	3.53641	2.74321	-0.28624	5.22445	7.57571		5.06595	1.55157	-2.49939	-3.5292	1.0222	-1.29593	0.151913	3.35782	-1.85551	-0.394146	-3.22607	-0.633472	-1.65989	0.133068	-1.62211	-1.93517	-0.49556
	5.07619	3.4902	5.73254	3.39541	4.80874	1.87354	4.95767	-1.27988	2.01593	0.132683	2.29576	1.80531	2.15278	2.61233	6.2673	2.84089	6.92842	3.91282	4.20618	3.45761	5.72226	5.25812	2.7854	5.92391	5.80031	3.72848	3.72438	2.89512	0.000171661	5.54545	7.93889		5.07619	1.4516	-2.55198	-3.22794	0.941746	-1.3432	0.368221	3.37065	-2.0116	-0.347332	-3.12514	-0.592335	-1.71545	0.0682411	-1.59431	-1.96016	-0.483353
	5.08643	3.8297	6.12636	3.69697	4.96627	2.32809	5.26376	-1.0699	2.45502	0.500397	2.66436	2.10697	2.38795	2.957	6.54691	3.29373	7.25557	4.13573	4.47704	4.07841	6.21807	5.51342	3.1235	6.28822	6.03944	4.01825	3.97121	3.1198	0.231018	5.75756	8.32043		5.08643	1.27018	-2.54004	-2.97317	0.798038	-1.34529	0.507824	3.30001	-2.15966	-0.316624	-3.06174	-0.537174	-1.76304	0.0681801	-1.58728	-1.80718	-0.361721
	5.09667	3.92788	6.70811	4.03938	5.14142	2.80468	5.62873	-0.808594	2.85639	0.851585	3.0617	2.51401	2.64827	3.35894	6.93502	3.90152	7.67513	4.43813	4.79747	4.53942	6.76272	5.87494	3.52588	6.71307	6.36182	4.27754	4.16727	3.43328	0.508991	6.04612	8.66928		5.09667	1.10925	-2.66451	-2.88457	0.808529	-1.30339	0.517517	3.2323	-2.14112	-0.228256	-2.926	-0.616627	-1.77538	0.0182915	-1.46584	-1.77784	-0.10466
	5.10691	4.26597	7.15664	4.48996	5.4134	3.14977	5.86601	-0.606308	3.38996	1.25691	3.59326	2.92654	2.92532	3.79157	7.32855	4.55715	8.15474	4.61823	5.18895	4.96704	7.42387	6.26442	3.96955	7.09085	6.63435	4.63126	4.36672	3.69334	0.926369	6.3841	8.97562		5.10691	1.04097	-2.59592	-2.74137	0.796253	-1.31709	0.478512	3.11322	-2.09044	-0.186413	-2.90421	-0.643452	-1.92742	-0.0530434	-1.32343	-1.72135	0.00575256
	5.11715	4.63237	7.64029	4.88848	5.66301	3.4652	6.0947	-0.302261	3.98491	1.86398	4.09829	3.35564	3.31389	4.24408	7.73867	5.13815	8.73111	4.90625	5.7369	5.46934	8.0979	6.57688	4.34029	7.4759	7.02714	5.00597	4.61854	3.89013	1.36335	6.68137	9.32838		5.11715	1.13142	-2.59846	-2.51645	0.67342	-1.23307	0.451008	3.0017	-2.05612	-0.24287	-2.83091	-0.630573	-1.91005	-0.180058	-1.24636	-1.77991	0.104633
	5.12739	5.04044	8.21436	5.30762	5.96621	3.84763	6.27942	0.02108	4.54567	2.38345	4.63161	3.86559	3.80812	4.69543	8.13046	5.62858	9.34657	5.35786	6.12182	6.08178	8.83932	6.92686	4.76311	7.97319	7.38681	5.45271	4.86577	4.23882	1.87965	7.05043	9.80711		5.12739	1.1581	-2.63303	-2.24103	0.656811	-1.22653	0.527294	2.82388	-2.06202	-0.24894	-2.72503	-0.570377	-1.91658	-0.206333	-1.15411	-1.69806	0.226612
	5.13763	5.64534	8.73349	5.84534	6.3661	4.18758	6.55057	0.329021	5.05894	2.91554	5.18296	4.44456	4.24666	5.22085	8.48693	6.09191	9.93065	5.61698	6.56171	6.70905	9.63678	7.27491	5.27684	8.41049	7.66496	5.82705	5.08886	4.71266	2.37158	7.49183	10.2737		5.13763	1.12994	-2.68348	-2.05185	0.75285	-1.27788	0.598568	2.71911	-2.11048	-0.155205	-2.67724	-0.567657	-1.83661	-0.221485	-1.02674	-1.58802	0.365261
	5.14787	6.08762	9.22499	6.29708	6.77485	4.61448	6.79551	0.674919	5.59173	3.38072	5.67181	4.99184	4.60976	5.79408	8.82407	6.55823	10.4534	5.81295	7.01054	7.37501	10.5469	7.55388	5.68585	8.85052	7.95089	6.27781	5.30173	5.09388	2.74384	7.81552	10.826		5.14787	1.07035	-2.66691	-1.93427	0.837105	-1.31947	0.608952	2.73685	-1.98229	-0.0960045	-2.47949	-0.587566	-1.76387	-0.1754	-0.890354	-1.41542	0.610214
	5.15811	6.55094	9.77241	6.70896	7.08341	5.07577	7.11589	0.992947	6.1181	3.89822	6.23833	5.65178	5.04839	6.29222	9.17048	7.11916	11.0241	6.07118	7.46566	8.14163	11.3371	7.81688	6.11127	9.29797	8.15033	6.76871	5.56287	5.35661	3.34351	8.15744	11.3759		5.15811	1.04452	-2.7469	-1.67184	0.827248	-1.25832	0.674732	2.69341	-1.8915	-0.101345	-2.42268	-0.500317	-1.60832	-0.104778	-0.773174	-1.3163	0.714569
	5.16835	6.94412	10.4332	7.08734	7.33681	5.58652	7.46007	1.40812	6.68099	4.56325	6.88488	6.38585	5.56906	6.82697	9.57088	7.67229	11.6938	6.45038	7.95374	8.9642	12.1422	8.23923	6.73508	9.97908	8.40306	7.334	5.76918	5.70401	3.97755	8.78827	11.7556		5.16835	0.890987	-2.67279	-1.31915	0.845615	-1.28884	0.750927	2.67734	-1.83875	-0.0637093	-2.23107	-0.360603	-1.47005	-0.243122	-0.621635	-1.16685	0.738197
	5.17859	7.36365	11.0614	7.418	7.67001	5.97496	7.89831	1.92335	7.35891	5.197	7.5171	7.02827	6.03241	7.40049	10.0102	8.16065	12.4669	6.67923	8.46066	9.78125	13.0764	8.68328	7.25366	10.8146	8.62463	7.93891	6.02995	6.13406	4.57557	9.08891	12.1416		5.17859	0.863903	-2.66106	-0.992615	0.807865	-1.21354	0.891224	2.66043	-1.78112	-0.0958633	-1.96778	-0.266262	-1.36879	-0.343937	-0.459095	-1.09381	0.918537
	5.18883	7.68041	11.7613	7.96965	7.9607	6.38155	8.19987	2.30712	8.02087	5.80988	8.10024	7.7922	6.61453	8.1123	10.5505	8.86155	13.3307	6.96024	9.00734	10.6344	14.3144	9.04991	7.71927	11.5325	8.92535	8.53041	6.36177	6.65154	5.06256	9.02877	12.486		5.18883	0.855824	-2.7574	-0.601154	0.726635	-1.20295	1.05745	2.6228	-1.67543	0.00290298	-1.69085	-0.241642	-1.19054	-0.353245	-0.395721	-0.989811	1.20502
	5.19907	8.16292	12.4886	8.49339	8.2232	6.81267	8.63495	2.64201	8.86078	6.45647	8.69557	8.62508	7.07488	8.72742	11.1319	9.35179	14.1892	7.34944	9.51475	11.4886	15.5929	9.53757	8.20165	12.1188	9.20538	9.15468	6.60284	7.09317	5.54964	9.43897	12.9637		5.19907	0.977055	-2.86554	-0.143581	0.704571	-1.11563	1.16212	2.50161	-1.53982	0.0298653	-1.43229	-0.110466	-0.994869	-0.43755	-0.128345	-0.843708	1.45792
	5.20931	8.59561	13.2138	8.96898	8.52534	7.33868	9.04667	2.98442	9.65571	6.93329	9.26547	9.38458	7.55784	9.37342	11.6676	9.87311	15.019	7.78251	9.95603	12.3869	16.7183	10.0514	8.69312	12.7758	9.45924	9.92768	7.05909	7.40355	6.07956	10.1162	13.4398		5.20931	1.11885	-2.81145	0.184338	0.685364	-0.980335	1.29988	2.42007	-1.51757	-0.0019722	-1.35196	-0.0631523	-0.781826	-0.501827	0.0144539	-0.666912	1.53454
	5.21955	9.00995	13.8805	9.60036	8.92288	7.76124	9.56922	3.40374	10.3082	7.45924	9.90581	10.1397	7.95071	10.0627	12.2194	10.5202	15.9239	8.00724	10.4028	13.2989	18.0546	10.4912	9.29272	13.6575	9.86902	10.6086	7.41221	7.81879	6.65328	10.7802	13.8843		5.21955	1.26442	-2.75205	0.447292	0.58765	-0.840801	1.46411	2.16337	-1.45236	0.015049	-1.15165	-0.0189629	-0.599567	-0.528748	0.220867	-0.437218	1.60021
	5.22979	9.47013	14.5969	10.1497	9.25438	8.19967	10.0889	3.85126	10.9578	8.20094	10.5972	10.9806	8.45018	10.8031	12.8832	11.1814	16.7644	8.1561	10.9446	14.3423	19.4438	11.1786	10.0025	14.49	10.2471	11.1402	7.79932	8.25993	7.20641	11.5201	14.2328		5.22979	1.29667	-2.70197	0.675255	0.359623	-0.638931	1.61412	2.04544	-1.35979	0.124413	-0.839539	0.0805092	-0.344738	-0.427563	0.59734	-0.282974	1.91013
	5.24003	9.88555	15.341	10.7106	9.59387	8.76379	10.5124	4.30177	11.6221	9.05329	11.3739	11.9325	9.07622	11.5586	13.5236	11.9496	17.6363	8.55219	11.4472	15.3419	20.7664	11.8742	10.6882	15.2897	10.6347	11.8017	8.21294	8.74913	7.69239	12.3431	14.7872		5.24003	1.4022	-2.62309	1.09255	0.27737	-0.449284	1.70315	1.95596	-1.22405	0.176697	-0.608795	0.179585	-0.18639	-0.423546	0.790291	-0.075943	2.16282
	5.25027	10.463	16.073	11.3052	9.95328	9.28771	10.9163	4.59269	12.5174	9.7709	12.1412	12.935	9.72438	12.2494	14.2549	12.688	18.6303	8.95179	12.0815	16.4107	22.0565	12.5417	11.386	16.1129	11.1097	12.5174	8.54668	9.10855	8.21013	13.0963	15.4145		5.25027	1.49731	-2.66635	1.45897	0.247128	-0.148148	1.85394	1.83857	-1.0596	0.282806	-0.341957	0.380581	-0.0815811	-0.315647	0.962704	0.0858841	2.44718
	5.26051	10.9654	16.8825	11.9868	10.2992	9.73311	11.4123	5.05252	13.5635	10.4831	12.9764	13.9503	10.4552	13.0501	14.9851	13.3751	19.6524	9.27333	12.7295	17.5539	23.3669	13.2768	12.065	16.9879	11.5956	13.2443	8.83773	9.42624	8.78016	13.7844	15.9818		5.26051	1.66964	-2.61641	1.7804	0.324947	0.156349	2.02125	1.77564	-0.832623	0.462643	-0.0500145	0.526638	0.0423241	-0.269848	1.1587	0.275261	2.68504
	5.27075	11.4119	17.6282	12.757	10.6738	10.1947	12.0647	5.49044	14.6822	11.3084	13.8901	15.0061	11.1224	13.8365	15.5579	14.1929	20.4606	9.55053	13.4153	18.6814	24.7338	13.8624	12.8358	17.867	12.0082	14.0607	9.13668	9.79401	9.45826	14.5228	16.4745		5.27075	1.83271	-2.44805	2.12659	0.418705	0.288361	2.08116	1.71814	-0.58139	0.6707	0.244862	0.654179	0.276752	-0.239986	1.37775	0.421173	3.0344
	5.28099	11.9667	18.4427	13.433	11.0521	10.7654	12.6414	5.9462	15.6761	12.2928	14.7758	15.9665	11.7905	14.7651	16.1527	14.9736	21.2339	9.94333	13.9571	19.812	26.1549	14.5346	13.5669	18.8004	12.3424	14.978	9.46894	10.1349	10.057	15.3249	16.8537		5.28099	2.11164	-2.32631	2.49184	0.457104	0.431271	2.23904	1.61568	-0.583954	0.974277	0.578396	0.872913	0.61528	-0.159687	1.62987	0.636917	3.28427
	5.29123	12.6458	19.257	14.0834	11.3902	11.3024	13.3039	6.38445	16.5858	13.2957	15.7231	16.9657	12.469	15.7109	16.5962	15.7426	21.9557	10.3532	14.5694	20.8983	27.3704	15.3028	14.4101	19.6815	12.6563	15.8374	9.89321	10.5997	10.7421	16.0227	17.3896		5.29123	2.3313	-2.22062	2.91577	0.439556	0.592773	2.33385	1.48609	-0.538391	1.15242	0.804668	1.17109	0.965412	-0.192257	1.87465	0.835697	3.49501
	5.30147	13.3799	19.9346	14.8221	11.7846	11.8572	13.8668	6.78686	17.5908	14.4132	16.6772	18.0434	13.2388	16.5636	17.1681	16.5659	22.5578	10.7459	15.2143	22.0843	28.5662	16.1444	15.2139	20.412	13.1391	16.6904	10.2931	11.1059	11.4257	16.7009	17.7768		5.30147	2.64471	-2.12337	3.36045	0.42625	0.707333	2.44259	1.42944	-0.350567	1.39396	1.04185	1.43934	1.33567	-0.112576	2.08539	1.01609	3.7214
	5.31171	14.0756	20.471	15.6857	12.1204	12.4344	14.5127	7.20846	18.6384	15.604	17.6028	19.1601	14.0319	17.4291	17.6889	17.3898	23.1545	11.1878	15.8884	23.2327	29.5723	17.0153	16.001	21.1357	13.6226	17.5327	10.7492	11.6271	12.3142	17.3164	18.123		5.31171	2.99059	-2.06131	3.68901	0.387554	0.848717	2.64573	1.44102	-0.289398	1.678	1.41182	1.5655	1.65656	-0.0471764	2.29352	1.13981	3.97943
	5.32195	14.575	21.1444	16.5231	12.4004	13.1976	15.1032	7.46741	19.7461	16.7099	18.5819	20.3697	14.7689	18.3278	18.2148	18.2352	23.8313	11.6748	16.4541	24.3495	30.6494	17.9011	16.8191	21.9583	13.9461	18.3851	11.2505	12.0604	13.216	17.9993	18.446		5.32195	3.30573	-1.88529	4.05226	0.418526	1.0308	2.77769	1.42484	-0.15852	1.93653	1.64974	1.83993	1.7657	0.0805206	2.52445	1.4168	4.29011
	5.33219	15.2117	21.6169	17.2798	12.7442	13.947	15.6313	7.86187	20.7971	17.8624	19.5861	21.6005	15.6096	19.1485	18.6585	19.0062	24.3895	12.2535	17.0436	25.4294	31.5965	18.7857	17.5653	22.7848	14.2913	19.0922	11.7637	12.4199	14.0963	18.7414	18.7313		5.33219	3.4595	-1.61424	4.39464	0.598316	1.30529	3.04198	1.23609	0.0192833	2.19857	1.9173	2.09296	1.99769	0.180798	2.79595	1.66874	4.54715
	5.34243	15.8159	22.0783	18.0179	13.1347	14.6734	16.2076	8.2838	21.7589	19.1545	20.5223	22.8417	16.4998	19.9561	19.0981	19.6426	24.8779	12.822	17.6321	26.4821	32.4516	19.476	18.4063	23.4455	14.6827	19.792	12.4009	12.8803	14.9405	19.4784	19.0349		5.34243	3.59865	-1.40355	4.79445	0.47583	1.55004	3.13011	1.161	0.193111	2.39021	2.18451	2.28148	2.22007	0.293736	3.14879	1.93165	4.77403
	5.35267	16.4614	22.4886	18.7859	13.5819	15.4554	16.7371	8.69469	22.6391	20.2341	21.5037	23.9141	17.3956	20.6077	19.5278	20.2901	25.2823	13.3046	18.12	27.4027	33.2668	20.0378	19.2002	24.0827	15.039	20.6293	13.1735	13.2721	15.8082	20.0935	19.2248		5.35267	3.83468	-1.16713	5.09308	0.420063	1.7476	3.27892	1.05663	0.502377	2.63911	2.43066	2.50941	2.4915	0.289066	3.40854	2.32936	5.13746
	5.36291	17.0822	22.8092	19.4929	13.9538	16.298	17.2191	9.05428	23.4655	21.4296	22.4516	24.8931	18.263	21.2784	20.0196	21.014	25.5036	13.7455	18.6272	28.2703	33.81	20.6968	20.1983	24.5685	15.2372	21.3619	13.88	13.6161	16.7213	20.4662	19.3389		5.36291	4.05175	-0.94648	5.39902	0.281422	1.95987	3.44489	1.09418	0.812595	2.81401	2.67406	2.73078	2.76303	0.389271	3.66516	2.62841	5.34918
	5.37315	17.7704	22.9957	20.2619	14.3711	17.0911	17.6184	9.36246	24.3225	22.567	23.346	25.8357	19.116	21.9323	20.3873	21.6115	25.6696	14.2504	19.0664	29.0573	34.2062	21.371	21.0776	24.9998	15.4577	22.0796	14.4815	14.0031	17.6419	20.8002	19.4204		5.37315	4.28805	-0.611004	5.73812	0.174801	2.22241	3.58009	1.08972	1.09144	3.09176	2.85634	3.02473	3.00711	0.442234	3.84332	2.87207	5.52644
	5.38339	18.4093	23.1639	20.9571	14.8055	17.832	17.9593	9.68647	25.0412	23.7829	24.1499	26.6414	19.9408	22.5619	20.6382	22.2114	25.7233	14.6547	19.4091	29.8282	34.4573	21.9614	21.6876	25.3923	15.6224	22.7923	15.0822	14.3332	18.555	21.2166	19.4596		5.38339	4.5836	-0.385387	6.07044	0.193722	2.30439	3.80344	1.09071	1.29773	3.42832	3.09997	3.31884	3.29885	0.429707	4.17692	3.22463	5.86329
	5.39363	18.9676	23.2245	21.6319	15.1056	18.7064	18.3573	9.92769	25.6001	24.9995	24.9451	27.5954	20.7506	23.1077	20.8142	22.7074	25.6607	14.9503	19.6734	30.4621	34.576	22.5275	22.2569	25.7376	15.7733	23.4797	15.7412	14.7594	19.5342	21.6427	19.3482		5.39363	4.8471	-0.210377	6.4033	0.2528	2.47908	3.91274	1.0053	1.43422	3.67578	3.44698	3.56229	3.50653	0.519794	4.38488	3.47886	6.08396
	5.40387	19.4489	23.1278	22.2535	15.3046	19.4276	18.6886	10.2626	25.9675	26.1895	25.7612	28.414	21.5083	23.5945	20.8801	23.1997	25.5004	15.3397	19.9548	30.9817	34.6298	22.9577	22.8393	25.9782	15.8326	24.0911	16.4277	15.3372	20.6229	21.9461	19.1873		5.40387	4.88519	0.0401077	6.71545	0.347298	2.67144	4.05151	0.899891	1.7032	3.82217	3.86303	3.75475	3.74588	0.756756	4.57187	3.57448	6.2449
	5.41411	19.9217	22.9645	22.7727	15.571	20.0782	18.8491	10.6525	26.4398	27.4095	26.4833	29.1154	22.297	24.0553	20.7475	23.4816	25.1711	15.7243	20.185	31.4992	34.6078	23.3785	23.3227	26.0086	15.865	24.6005	16.9959	15.7869	21.5264	22.11	18.9133		5.41411	5.07656	0.362843	6.97174	0.540035	2.87395	4.17902	0.821335	1.95887	3.91973	4.14097	3.99279	3.87755	0.920647	4.86765	3.72745	6.37758
	5.42435	20.2909	22.6818	23.2531	15.9676	20.6496	18.9006	11.0607	26.8353	28.5671	27.2001	29.6823	23.0125	24.2994	20.7583	23.7084	24.8607	16.1252	20.3015	31.911	34.3057	23.599	23.7654	25.8549	15.8216	24.9909	17.4671	16.0348	22.3834	22.1293	18.5657		5.42435	5.14552	0.689335	7.25702	0.631886	3.10091	4.48713	0.842136	2.28888	4.11753	4.41297	4.13301	4.1094	1.26491	5.08821	3.91143	6.66025
	5.43459	20.5643	22.3736	23.8131	16.3046	21.1724	19.0433	11.3574	27.1089	29.574	27.7969	30.2404	23.4698	24.4406	20.7158	23.8844	24.3368	16.4995	20.4674	32.0207	33.8975	23.8434	24.1483	25.6629	15.6287	25.261	17.8354	16.2662	23.2204	22.0899	18.1624		5.43459	5.17209	0.978573	7.60751	0.7132	3.32864	4.66819	0.808495	2.577	4.44042	4.62016	4.37216	4.44703	1.55756	5.32525	3.99184	6.94856
	5.44483	20.6374	21.9028	24.1545	16.5235	21.7034	19.0333	11.6178	27.2029	30.4509	28.1479	30.5386	23.9857	24.3172	20.5519	23.8391	23.8403	16.8444	20.5178	31.9242	33.3924	23.9497	24.4434	25.4355	15.5662	25.4358	18.2499	16.4852	24.0765	22.037	17.5858		5.44483	5.20888	1.37149	7.84305	0.755985	3.49694	4.81583	0.821167	2.90727	4.66586	4.84166	4.21459	4.70125	1.89437	5.51162	4.05	7.33949
	5.45507	20.7039	21.3665	24.3757	16.6115	22.1378	18.8922	11.9407	27.2641	31.2967	28.3667	30.5794	24.4193	24.2874	20.2666	23.8435	23.1896	16.9995	20.4567	31.8309	32.539	24.0531	24.7009	25.1676	15.2667	25.5542	18.7791	16.6557	24.7248	21.9534	17.0942		5.45507	5.25981	1.69696	8.08547	0.819714	3.73608	4.90279	0.745411	3.25741	4.76782	4.97137	4.01361	5.00502	2.18232	5.7017	4.20179	7.61471
	5.46531	20.6697	20.7549	24.5618	16.7425	22.5796	18.6539	12.3022	27.1145	32.0811	28.4664	30.4409	24.7519	24.1882	19.8921	23.7744	22.3358	17.1774	20.3882	31.5689	31.6605	23.9203	24.9294	24.7603	15.0237	25.5632	19.2606	16.7635	25.3095	21.7647	16.5086		5.46531	5.32933	2.07601	8.32707	0.898129	3.97779	5.07993	0.661724	3.64946	4.94271	5.12136	4.20641	5.2748	2.51051	5.84562	4.33076	7.74667
	5.47555	20.6184	20.0894	24.6919	16.8164	23.0229	18.2942	12.6968	26.7804	32.6399	28.5566	30.2661	24.9607	23.8836	19.4448	23.4903	21.4237	17.2831	20.2817	31.1758	30.6914	23.6573	25.0664	24.2922	14.7357	25.4305	19.6133	16.8126	25.8922	21.3637	15.9287		5.47555	5.40147	2.37753	8.49612	1.01112	4.18215	5.23741	0.507195	3.95115	5.18997	5.1977	4.42755	5.4295	2.72813	6.0122	4.46981	7.81109
	5.48579	20.4389	19.2891	24.6658	16.7993	23.2548	17.9321	13.1606	26.3379	33.0046	28.372	29.9832	25.0693	23.5433	18.8543	23.1054	20.4786	17.2895	20.0941	30.6897	29.4289	23.3091	24.9484	23.6165	14.4275	25.1909	19.8692	16.8014	26.5246	20.9416	15.286		5.48579	5.51478	2.62885	8.75881	1.26438	4.38295	5.341	0.487629	4.44553	5.39483	5.30692	4.58232	5.5793	2.95786	6.2191	4.56713	7.89681
	5.49603	20.1368	18.3392	24.6206	16.727	23.3898	17.6266	13.4969	25.9055	33.2754	28.0696	29.5784	25.1199	23.1688	18.193	22.7067	19.4724	17.2633	19.878	30.0111	28.1399	22.8308	24.8344	22.9173	14.0273	24.8607	20.1108	16.8304	27.1056	20.42	14.6251		5.49603	5.65668	2.98225	8.95159	1.57581	4.59091	5.482	0.541443	4.75846	5.5414	5.48126	4.70652	5.75353	3.34366	6.43498	4.5592	8.03056
	5.50627	19.6972	17.4486	24.4021	16.5067	23.3883	17.2088	13.7671	25.3454	33.4282	27.729	28.9774	25.0358	22.7072	17.511	22.2719	18.3888	17.2994	19.4473	29.1997	26.7942	22.2457	24.6123	22.1126	13.5927	24.3869	20.3638	16.7349	27.5582	19.9069	13.8716		5.50627	5.7668	3.23178	9.10882	1.82131	4.6351	5.67285	0.54472	5.03959	5.50468	5.65882	4.79894	5.98682	3.70342	6.61386	4.67326	8.10805
	5.51651	19.2309	16.5639	24.1731	16.2132	23.4485	16.6505	13.9536	24.6902	33.4051	27.2219	28.2632	24.8455	22.0286	16.901	21.6814	17.3027	17.2029	18.9197	28.3108	25.5318	21.6661	24.1046	21.0812	12.9987	23.7965	20.3613	16.5809	27.7772	19.1549	13.14		5.51651	5.85328	3.40136	9.29266	1.96913	4.82607	5.85089	0.521664	5.30515	5.50459	5.8469	4.90553	6.22118	3.9635	6.83521	4.68293	8.09852
	5.52675	18.6786	15.664	23.7382	15.96	23.4194	15.9768	14.2475	23.81	33.2434	26.7066	27.416	24.5471	21.2896	16.1878	21.0015	16.1711	16.9589	18.4526	27.3708	24.1501	21.047	23.5177	20.0753	12.4254	23.1519	20.3569	16.3414	27.9535	18.3495	12.3313		5.52675	5.98262	3.59417	9.57041	2.12155	4.93079	6.04516	0.46727	5.53526	5.60522	6.05523	4.92269	6.32396	4.23962	7.00275	4.62171	8.15863
	5.53699	18.1016	14.5933	23.226	15.5862	23.2434	15.2952	14.5066	22.7917	32.9037	26.1466	26.5918	24.2185	20.5929	15.4505	20.3403	15.1428	16.7269	18.0091	26.403	22.6145	20.2797	22.8137	19.0696	11.7883	22.4371	20.2045	16.1188	28.1028	17.5053	11.6519		5.53699	6.01897	3.82574	9.96164	2.2548	4.95748	6.27231	0.418468	5.78123	5.7383	6.19815	4.97745	6.44596	4.589	7.13252	4.57898	8.25372
	5.54723	17.4461	13.5742	22.7627	15.1073	22.8845	14.5144	14.5499	21.8048	32.6455	25.5123	25.686	23.71	19.7399	14.5796	19.6392	14.1666	16.5267	17.3531	25.3268	21.0811	19.4883	22.0086	18.0745	11.213	21.5487	19.9254	15.9252	28.0509	16.6479	10.9787		5.54723	6.00789	4.04499	10.3451	2.39539	4.99089	6.0071	0.417965	6.03442	5.88451	6.23499	4.96281	6.57334	4.82317	7.21312	4.53967	8.32053
	5.55747	16.7105	12.6838	22.2639	14.5576	22.4982	13.7767	14.5964	20.7196	32.192	24.5397	24.6995	23.144	18.7568	13.7864	18.7902	13.2732	16.2332	16.6902	24.1459	19.6487	18.7971	21.0911	17.0319	10.6253	20.6812	19.6576	15.5819	27.8516	15.6479	10.3775		5.55747	5.9225	4.26189	10.805	2.5546	5.10525	5.98634	0.472027	6.33379	5.99528	6.2112	4.90498	6.7076	5.03391	7.3415	4.66405	8.40048
	5.56771	16.0139	11.7224	21.4882	14.0911	22.0476	13.1425	14.6917	19.6328	31.5283	23.6046	23.5339	22.5325	17.8876	13.1449	17.8717	12.2552	15.8738	15.9516	22.8627	18.3482	18.0093	20.3198	16.0416	9.93895	19.646	19.2787	15.0261	27.5449	14.7291	9.67602		5.56771	5.83541	4.48918	11.233	2.82201	5.16775	6.25053	0.593132	6.49679	6.09198	6.15504	4.86264	6.84766	5.28426	7.33848	4.55688	8.6299
	5.57795	15.3823	10.752	20.5313	13.636	21.5334	12.4535	14.7092	18.5626	30.6717	22.6407	22.3596	21.8223	16.9448	12.4386	17.0424	11.2306	15.444	15.3275	21.6091	16.8879	17.1853	19.3545	15.0598	9.34937	18.6476	18.8678	14.4591	27.0863	13.7844	8.90438		5.57795	5.74817	4.75404	11.6871	3.01942	5.33128	6.62653	0.653965	6.71596	6.21457	6.1379	4.67779	6.988	5.58627	7.35132	4.47177	8.85817
	5.58819	14.5299	9.83258	19.6156	13.1189	20.898	11.7525	14.6308	17.4821	29.6439	21.6618	21.1208	21.075	15.98	11.7242	16.0699	10.2729	14.9641	14.6667	20.2833	15.4779	16.2304	18.2673	14.0916	8.72699	17.6394	18.3594	13.9661	26.5029	12.8862	8.26962		5.58819	5.69792	4.94254	12.1708	3.23058	5.42821	6.78425	0.528996	6.88605	6.19753	6.07829	4.55435	7.1351	5.81001	7.4459	4.38218	8.99059
	5.59843	13.805	8.97396	18.6207	12.5225	20.0971	10.9564	14.563	16.4343	28.4471	20.6174	19.8022	20.2061	14.9532	10.8837	15.0559	9.34674	14.3458	13.8977	18.9166	14.1363	15.2634	17.3404	13.1336	8.15732	16.6516	17.8191	13.3943	25.8391	12.0177	7.74452		5.59843	5.64095	5.0101	12.6788	3.2818	5.58812	6.99037	0.46286	7.1835	6.07209	6.06468	4.3799	7.14245	6.11633	7.47922	4.34369	9.16297
	5.60867	13.0766	8.22102	17.6184	11.9678	19.3279	10.1455	14.3981	15.3159	27.2231	19.4492	18.5582	19.1999	13.9371	10.058	14.0159	8.4984	13.8158	13.075	17.5749	12.9154	14.3492	16.3811	12.1441	7.53887	15.6226	17.1469	12.7511	25.0079	11.0521	7.15262		5.60867	5.51984	5.04627	13.1805	3.40492	5.74396	7.14293	0.430981	7.44909	6.13242	6.12993	4.20315	7.17521	6.38329	7.54406	4.23625	9.42349
	5.61891	12.2701	7.41459	16.4878	11.3754	18.5048	9.36488	14.0606	14.1235	26.0437	18.2749	17.3083	18.2059	13.0707	9.21683	12.9931	7.79592	13.0741	12.3522	16.2277	11.5536	13.5477	15.4351	11.1506	7.00678	14.4806	16.2914	12.0685	24.1133	10.2012	6.56684		5.61891	5.46802	5.06252	13.6929	3.55856	5.91264	7.16658	0.386555	7.66843	6.19214	6.18252	4.05062	7.22544	6.49195	7.66172	4.01678	9.7132
	5.62915	11.3821	6.56384	15.4815	10.8593	17.5621	8.66828	13.7167	13.0333	24.7531	17.1008	15.9994	17.1762	12.1227	8.54594	12.0447	7.07667	12.3272	11.6569	14.9706	10.3508	12.6212	14.4014	10.2374	6.34245	13.4133	15.5323	11.3684	23.2092	9.29656	5.99288		5.62915	5.3204	5.08258	14.2562	3.59135	5.9215	7.19603	0.362568	7.88177	6.18713	6.22514	3.93718	7.292	6.54319	7.5922	3.8538	9.92082
	5.63939	10.6812	5.74016	14.6126	10.1276	16.629	7.93982	13.4623	11.9781	23.455	15.9796	14.8505	16.0055	11.1142	7.87399	11.1257	6.35921	11.6416	10.8529	13.7806	9.21359	11.7221	13.3868	9.36847	5.75341	12.5037	14.8355	10.6533	22.2325	8.36873	5.42378		5.63939	5.07604	5.14399	14.7618	3.57734	6.01282	7.25365	0.311176	7.88355	6.1772	6.17425	3.8489	7.35752	6.62182	7.60519	3.83242	10.0991
	5.64963	9.99849	4.93003	13.6487	9.28895	15.7207	7.26943	13.0306	10.9677	22.0293	14.9062	13.6721	14.9559	10.1517	7.23871	10.2606	5.88416	10.9155	10.2089	12.7198	8.05405	10.8458	12.4261	8.52237	5.10551	11.5587	14.1563	9.97653	21.1438	7.40472	4.98832		5.64963	4.89419	5.30718	15.1511	3.58617	6.18967	7.2415	0.38628	7.90786	6.13446	6.15793	3.64301	7.42562	6.84833	7.4745	3.83064	10.2813
	5.65987	9.26613	4.1432	12.6868	8.41632	14.9085	6.54428	12.5118	9.94865	20.5493	13.9641	12.5006	13.9275	9.24763	6.63469	9.45176	5.38271	10.1318	9.55927	11.6439	6.97235	9.88032	11.4275	7.76869	4.63807	10.4697	13.2479	9.28636	19.8735	6.67887	4.63964		5.65987	4.8654	5.38238	15.4861	3.63938	6.26707	7.13443	0.299507	7.92249	6.18064	6.19143	3.49273	7.3812	6.96139	7.42336	3.63441	10.5662
	5.67011	8.40434	3.51185	11.7857	7.81192	14.028	5.91855	12.0155	8.96278	19.0739	12.9825	11.3827	12.9965	8.33949	6.13054	8.58565	4.76509	9.43029	8.9244	10.6686	6.0457	9.03137	10.5838	7.09527	4.10244	9.47376	12.2387	8.62538	18.696	6.05814	4.12411		5.67011	4.77468	5.35434	15.9077	3.71627	6.46203	7.04222	0.349003	7.97891	6.1245	6.20971	3.21333	7.41673	6.98889	7.29248	3.4745	10.794
	5.68035	7.70659	2.94236	10.8745	7.20258	13.1949	5.25977	11.4791	7.99485	17.7024	12.0963	10.3281	12.0761	7.22556	5.5476	7.7017	4.18261	8.8139	8.1779	9.71014	5.1982	8.22529	9.72571	6.43971	3.56437	8.57176	11.4703	7.931	17.5785	5.40425	3.62639		5.68035	4.61236	5.17952	16.2584	3.72433	6.49996	7.06994	0.29488	8.13417	6.01032	6.06787	2.96578	7.39611	7.08985	7.26668	3.3215	10.9891
	5.69059	7.02758	2.45593	9.89138	6.59218	12.3612	4.5428	11.0105	7.05824	16.3824	11.1987	9.25517	11.1907	6.54228	5.02814	6.80228	3.64784	8.17174	7.41759	8.82854	4.43317	7.56054	8.72587	5.67443	3.09571	7.80418	10.8158	7.27897	16.4481	4.71373	3.39742		5.69059	4.48101	5.09272	16.4354	3.8133	6.5224	7.07243	0.194843	8.23685	5.91448	6.00272	2.76786	7.40164	7.17135	7.24979	3.17271	11.118
	5.70083	6.4071	1.80616	8.99901	6.04315	11.5625	4.01998	10.5801	6.18186	15.1264	10.4331	8.30858	10.2985	6.04521	4.49969	6.00812	3.20315	7.60595	6.80418	8.03786	3.72441	6.88519	7.89888	5.01842	2.72852	6.9855	10.0647	6.72471	15.3016	4.10396	3.19688		5.70083	4.43797	4.97183	16.5858	3.85545	6.69555	7.08492	0.195034	8.29889	5.79085	5.99192	2.76767	7.47079	7.08387	7.23795	2.93961	11.1538
	5.71107	5.83588	1.30721	8.15173	5.50365	10.7588	3.47523	10.1135	5.54244	13.8729	9.72898	7.46417	9.29228	5.64878	3.99436	5.28117	2.86436	6.91235	6.16283	7.36251	3.05617	6.2606	7.13718	4.52201	2.40609	6.34463	9.33593	6.09056	14.0274	3.62626	2.88567		5.71107	4.251	4.87583	16.7561	3.81796	6.99396	7.08119	0.232044	8.42189	5.70174	5.94092	2.71439	7.39422	7.06615	7.25663	2.88551	11.1876
	5.72131	5.2636	0.874107	7.36156	5.05251	9.97547	3.08174	9.55692	4.9179	12.6939	8.88191	6.79245	8.3562	5.19574	3.64009	4.63964	2.42574	6.39693	5.69014	6.6522	2.42994	5.60261	6.34726	3.97913	2.06739	5.78469	8.5288	5.48202	12.8491	2.99279	2.6731		5.72131	4.10349	4.66235	16.8257	3.71298	7.17642	6.96556	0.237305	8.52748	5.44681	5.8056	2.53167	7.36093	7.0741	7.14878	2.7896	11.2078
	5.73155	4.76221	0.315659	6.52219	4.62467	9.11979	2.57255	9.1598	4.33592	11.5916	8.13173	6.04292	7.50544	4.64909	3.18274	3.96027	2.10742	5.91749	5.199	5.97059	1.95364	5.02398	5.59551	3.49119	1.73531	5.10598	7.73305	4.96978	11.8095	2.43967	2.47357		5.73155	3.89037	4.64261	16.7447	3.6692	7.27144	6.82049	0.319103	8.68126	5.24527	5.74318	2.34664	7.32495	7.05163	7.05735	2.73754	11.1069
	5.74179	4.28628	-0.121567	5.84331	4.15681	8.32566	2.18139	8.74703	3.63125	10.489	7.48169	5.34023	6.74167	4.26083	2.7723	3.31338	1.81077	5.52053	4.72824	5.32335	1.42594	4.46107	4.89392	3.09116	1.36378	4.45367	7.00585	4.4408	10.8584	2.02496	2.31176		5.74179	3.64216	4.57094	16.6265	3.70049	7.36409	6.71998	0.483128	8.86803	5.07199	5.67828	2.20783	7.34047	6.96291	6.91488	2.64999	10.9873
	5.75203	3.90369	-0.536522	5.18396	3.77531	7.6167	1.79563	8.26077	3.00545	9.43517	6.92077	4.6675	5.93431	3.8601	2.45526	2.6634	1.63078	5.07874	4.42065	4.65554	0.995937	3.92981	4.34999	2.67239	1.04648	4.0248	6.27792	3.95674	9.9525	1.64915	2.06517		5.75203	3.63936	4.54515	16.4911	3.67033	7.42596	6.58399	0.690811	8.97822	4.90398	5.58812	2.04553	7.40679	6.78085	6.85365	2.48521	10.782
	5.76227	3.535	-0.957592	4.62294	3.32015	7.02564	1.48249	7.84272	2.47042	8.5034	6.29445	4.02621	5.19326	3.47329	2.24457	2.08148	1.33378	4.62578	4.06504	3.99517	0.651161	3.51526	3.79939	2.31679	0.840515	3.65163	5.48114	3.59602	9.01555	1.34305	1.82067		5.76227	3.56453	4.39832	16.2048	3.6214	7.45954	6.51391	0.736172	9.05339	4.62223	5.49063	1.99005	7.41001	6.61341	6.71412	2.35985	10.6744
	5.77251	3.14938	-1.4409	4.1978	2.8717	6.37175	1.17373	7.53018	1.99652	7.66026	5.78114	3.52003	4.53349	3.03004	1.95002	1.56313	1.05801	4.15977	3.69719	3.51414	0.318233	3.10525	3.09353	1.84366	0.63205	3.255	4.77894	3.30375	8.16845	1.05798	1.70434		5.77251	3.4823	4.24475	15.878	3.60511	7.49692	6.2797	0.90324	9.14578	4.42019	5.47157	1.79359	7.58635	6.56889	6.5615	2.10239	10.5674
	5.78275	2.80415	-1.72525	3.78764	2.45655	5.78202	0.936501	7.22307	1.19265	6.85753	5.20951	3.12525	4.02103	2.60842	1.6679	1.16909	0.80307	3.68979	3.39997	3.0407	0.0052948	2.74514	2.52662	1.45856	0.466137	2.88941	4.21138	2.92449	7.35968	0.705971	1.64112		5.78275	3.36185	4.08307	15.5178	3.5394	7.51277	6.10241	1.17443	9.43349	4.24202	5.40844	1.60656	7.69281	6.42373	6.35945	1.98479	10.1753
	5.79299	2.4612	-2.01914	3.38177	2.06254	5.21032	0.80357	6.87129	0.702312	6.2132	4.71893	2.67408	3.58314	2.24432	1.29918	0.828224	0.514359	3.14463	3.11076	2.6185	-0.235016	2.43209	2.05177	1.12395	0.243786	2.44899	3.70031	2.54374	6.66149	0.613632	1.56178		5.79299	3.30508	3.92886	15.0513	3.40393	7.61301	5.97368	1.2949	9.73487	4.1678	5.43765	1.51348	7.86614	6.3531	6.21865	1.81713	9.83995
	5.80323	2.28631	-2.161	3.04119	1.69485	4.70291	0.770538	6.52006	0.524536	5.50857	4.27274	2.21838	3.26591	1.95727	1.03368	0.535885	0.301819	2.79421	2.89861	2.25857	-0.48748	2.14201	1.79651	0.798157	0.033741	2.27292	3.23718	2.26093	5.97545	0.565926	1.50514		5.80323	3.17279	3.77031	14.5443	3.33233	7.66168	5.81716	1.34803	9.98028	4.11888	5.46772	1.49445	8.09645	6.29929	6.21129	1.73043	9.60837
	5.81347	2.12547	-2.42895	2.59661	1.50441	4.28358	0.682976	6.24302	0.317802	4.90506	3.96666	1.75206	2.98702	1.72372	0.840656	0.254147	0.227837	2.46686	2.56212	1.94897	-0.533375	2.06029	1.43291	0.527267	0.0529099	2.044	2.86324	2.06224	5.29007	0.360981	1.42279		5.81347	3.1141	3.61322	14.0743	3.33803	7.65156	5.66147	1.58486	10.1679	3.90644	5.50184	1.45947	8.40778	6.18758	6.13565	1.59919	9.33856
	5.82371	1.95247	-2.59484	2.16808	1.51869	3.91537	0.622276	6.04529	0.119347	4.28904	3.73026	1.48862	2.61362	1.57079	0.744705	-0.0764465	0.264172	2.28686	2.34877	1.75341	-0.587471	1.90193	1.16251	0.456696	0.0187187	1.73003	2.4723	1.77641	4.64181	0.257687	1.4079		5.82371	3.13458	3.56801	13.487	3.27642	7.82463	5.59272	1.793	10.306	3.86329	5.58428	1.4999	8.63298	6.09426	6.16414	1.618	9.0061
	5.83395	1.65221	-2.80598	2.042	1.45708	3.62342	0.547279	5.87188	-0.113899	3.74102	3.48882	1.18684	2.09079	1.40162	0.702621	-0.277252	0.156395	2.21359	2.18201	1.49363	-0.715012	1.67935	0.866463	0.319626	-0.0283661	1.46337	2.03754	1.41378	3.97284	0.174477	1.32072		5.83395	3.15353	3.48553	12.7725	3.20985	8.12214	5.53856	1.94495	10.4233	3.8385	5.65601	1.55307	8.95048	5.80394	6.0486	1.6538	8.55635
	5.84419	1.58218	-3.05737	1.86969	1.39566	3.23454	0.529831	5.71231	-0.284561	3.41659	3.39954	0.842957	1.68829	1.17224	0.660675	-0.488815	0.148155	1.97968	2.05012	1.31085	-0.788361	1.5918	0.515858	0.203423	-0.0291214	1.32632	1.66595	1.05393	3.43479	0.212112	1.197		5.84419	3.17283	3.33634	12.1951	3.1269	8.35061	5.47641	2.0387	10.5782	3.81787	5.74447	1.58629	9.29157	5.61537	5.96599	1.50863	8.03378
	5.85443	1.37419	-3.03413	1.75454	1.31951	2.80056	0.684063	5.64579	-0.476776	3.01802	3.28555	0.664154	1.41112	1.03861	0.575882	-0.541527	0.19379	1.82381	2.04641	1.19533	-0.987598	1.5804	0.154381	0.0989723	-0.0215149	1.27668	1.33144	0.887375	3.04206	0.156944	1.13746		5.85443	3.14685	3.27273	11.5992	3.00736	8.4817	5.37159	2.21456	10.7642	3.6743	5.75581	1.6944	9.56125	5.51271	5.91082	1.38035	7.69744
	5.86467	1.31425	-3.05173	1.70035	1.3233	2.42281	0.786129	5.59084	-0.54142	2.71122	3.01022	0.504425	1.17119	0.840763	0.421005	-0.482353	0.339249	1.79158	2.04797	1.00896	-0.935574	1.66174	-0.162216	-0.0829086	-0.0222168	1.23969	1.06269	0.766518	2.68689	0.26088	1.17147		5.86467	3.04053	3.22635	10.993	2.85655	8.57802	5.2284	2.38299	10.8638	3.56312	5.66133	1.73745	9.96895	5.49058	5.89618	1.25317	7.34096
	5.87491	1.20028	-2.95403	1.66343	1.1468	2.21017	0.876072	5.53255	-0.575432	2.41087	2.85225	0.500324	1.05925	0.507599	0.271172	-0.541756	0.357834	1.79632	2.06639	0.859932	-0.954506	1.73112	-0.230919	-0.202568	0.0212822	1.11152	0.848381	0.719444	2.37091	0.329987	1.17987		5.87491	3.01048	3.19304	10.3594	2.75503	8.76285	5.0389	2.53394	10.973	3.51112	5.5839	1.8066	10.2638	5.29228	5.85533	1.29188	6.91538
	5.88515	1.1455	-2.96352	1.68427	1.03738	2.05754	0.878242	5.56338	-0.652332	2.13826	2.65057	0.445549	0.926453	0.297359	0.326279	-0.698311	0.462296	1.75539	2.05564	0.679867	-0.861389	1.81575	-0.450966	-0.290092	0.108829	1.08774	0.808838	0.609676	2.16695	0.389542	1.07514		5.88515	3.09628	3.17247	9.7222	2.78355	8.94419	4.88947	2.64721	11.0184	3.50266	5.66804	1.90305	10.5275	5.0995	5.85288	1.34052	6.41474
	5.89539	0.996346	-2.98064	1.64662	0.984577	1.90499	0.9543	5.48956	-0.774952	1.89787	2.54318	0.43718	0.842422	0.254276	0.440102	-0.785027	0.615208	1.74986	2.16321	0.563469	-0.836334	1.90258	-0.653694	-0.301773	0.133411	1.12049	0.693039	0.523056	1.94853	0.611916	0.954132		5.89539	3.08571	3.14947	9.19612	2.77286	9.11142	4.78843	2.92282	11.1553	3.6221	5.74712	2.0389	10.7296	5.11509	5.87374	1.47033	6.10675
	5.90563	0.907211	-2.95503	1.55553	0.938145	1.80418	1.11235	5.51476	-0.771889	1.76196	2.4661	0.216774	0.572399	0.252106	0.466232	-0.812824	0.775246	1.75842	2.14911	0.439625	-0.766392	1.98329	-0.737068	-0.453014	0.250938	1.09716	0.576584	0.487389	1.64892	0.782887	0.835159		5.90563	3.09225	3.15115	8.64812	2.71488	9.40887	4.64857	3.21909	11.2287	3.86259	5.81582	2.13329	10.9635	5.02349	6.03837	1.60317	5.90225
	5.91587	0.906006	-2.9533	1.60095	0.923126	1.81541	1.2996	5.49187	-0.63903	1.57694	2.36477	0.0798264	0.548759	0.254349	0.394718	-0.817879	0.793579	1.81392	2.24499	0.353649	-0.637146	1.93117	-0.881813	-0.431976	0.406437	1.11512	0.579491	0.490074	1.36463	0.930458	0.959805		5.91587	3.14853	3.19555	8.03637	2.69635	9.71834	4.56104	3.42723	11.2335	3.94834	5.87648	2.25586	11.2741	4.93258	6.05658	1.82681	5.73671
	5.92611	0.926903	-2.91698	1.58823	0.822811	1.71177	1.55632	5.46192	-0.57114	1.31655	2.38916	0.068264	0.588455	0.271851	0.361721	-0.755199	0.901035	1.93563	2.29886	0.196976	-0.421867	1.92006	-0.823292	-0.435501	0.619617	1.18206	0.572792	0.588135	1.25975	1.199	0.89275		5.92611	3.22732	3.33614	7.43681	2.62718	10.068	4.41116	3.58918	11.2169	3.99984	5.86086	2.4945	11.4837	4.76989	5.98879	1.99707	5.59853
	5.93635	0.925472	-2.77885	1.62077	0.79805	1.6266	1.78146	5.49484	-0.510498	1.05236	2.43269	0.107971	0.77924	0.244884	0.368683	-0.569923	0.936333	1.87606	2.38117	0.192886	-0.417503	1.99639	-0.733265	-0.367077	0.760536	1.21831	0.437645	0.596886	1.19374	1.46323	1.0067		5.93635	3.3311	3.4896	6.90114	2.72719	10.3926	4.4446	3.77584	11.1745	4.24682	5.87961	2.6539	11.6854	4.74103	5.97495	2.23569	5.46482
	5.94659	0.898521	-2.5239	1.75646	0.959614	1.55646	2.02547	5.63111	-0.432236	0.898533	2.50748	0.192589	0.821548	0.114983	0.392452	-0.401184	1.05234	1.82597	2.43488	0.194817	-0.33923	2.10374	-0.657021	-0.270077	0.963287	1.17408	0.504639	0.645714	1.1661	1.77709	0.981277		5.94659	3.44693	3.75377	6.59446	2.85192	10.9015	4.45892	4.09719	11.0785	4.49257	5.95542	3.03653	11.8868	4.60582	6.02398	2.5322	5.22163
	5.95683	0.83622	-2.46808	1.84393	1.08622	1.61292	2.14874	5.72344	-0.312325	0.808945	2.37176	0.310699	0.97802	0.0588455	0.471809	-0.230904	1.1653	1.85995	2.53785	0.228325	-0.204166	2.28451	-0.622662	-0.227211	1.18268	1.21375	0.543541	0.69014	1.21558	2.05561	1.15928		5.95683	3.56884	3.97614	6.29911	3.02523	11.4298	4.48505	4.18852	11.1305	4.63558	6.13629	3.48669	12.0684	4.52011	6.02828	2.78956	5.03486
	5.96707	0.649624	-2.45682	1.96473	1.14757	1.73308	2.23304	5.83934	-0.26506	0.733047	2.31258	0.438179	1.20278	0.134556	0.615673	-0.229584	1.24243	2.00447	2.59713	0.259953	0.00899124	2.51116	-0.581654	-0.224407	1.40707	1.22083	0.694004	0.768532	1.26815	2.31073	1.67634		5.96707	3.74647	4.19239	5.96171	3.13908	11.8337	4.4848	4.42237	11.2235	4.81005	6.27211	3.82152	12.2654	4.49932	5.91282	3.09552	4.87783
	5.97731	0.647202	-2.18938	1.97808	1.36927	1.72572	2.32147	5.98833	-0.248035	0.683502	2.35101	0.482361	1.36278	0.218597	0.837818	-0.123154	1.41486	2.20585	2.79404	0.23027	0.251167	2.62868	-0.56424	-0.172241	1.60238	1.3127	0.815536	0.950676	1.29084	2.54605	1.77431		5.97731	3.86385	4.52917	5.74813	3.31305	12.395	4.51035	4.73397	11.3399	5.10055	6.39413	4.24537	12.4057	4.59005	6.07117	3.37821	4.90709
	5.98755	0.765064	-1.95535	2.07648	1.51385	1.77044	2.61794	6.12719	-0.14518	0.591473	2.33602	0.689404	1.54763	0.291389	1.02426	0.00242615	1.55421	2.32566	2.94241	0.206009	0.3125	2.75665	-0.508984	-0.08498	1.82029	1.45363	0.964336	1.07101	1.32776	2.81294	1.57193		5.98755	4.1143	4.78189	5.56727	3.53499	12.9859	4.61786	4.88736	11.3893	5.30369	6.59062	4.6281	12.5102	4.83925	6.16478	3.73458	4.87868
	5.99779	0.780815	-1.74797	2.26124	1.78527	1.90976	2.92386	6.2804	-0.080452	0.50135	2.34182	0.828209	1.70596	0.280025	1.21629	0.289467	1.60356	2.52916	3.03202	0.14637	0.510601	2.88991	-0.465721	0.0972443	2.0559	1.63708	1.10594	1.22303	1.33428	2.97921	1.31209		5.99779	4.32888	5.01758	5.34576	3.70172	13.4644	4.7915	5.13179	11.4272	5.63356	6.74037	5.06461	12.6255	4.98529	6.40827	4.04132	5.02276
	6.00803	0.809364	-1.44592	2.40258	1.85979	1.99673	3.22783	6.39947	0.0627556	0.40107	2.36607	1.13229	1.90752	0.360195	1.3507	0.402287	1.76251	2.60149	3.16339	0.295975	0.665882	3.00937	-0.370522	0.205437	2.38394	1.79352	1.38577	1.36445	1.40727	3.30733	1.11084		6.00803	4.48578	5.35312	5.18997	3.98445	13.8287	4.88362	5.28271	11.429	5.82499	7.04842	5.51101	12.8059	5.10408	6.50196	4.35124	5.16085
	6.01827	0.837521	-1.13791	2.54566	2.05067	2.08472	3.43216	6.45396	0.231819	0.34943	2.50212	1.45952	2.06944	0.393623	1.43128	0.489822	1.86513	2.69894	3.20558	0.258438	0.740189	3.17078	-0.364548	0.294868	2.7695	1.84668	1.6903	1.54206	1.51995	3.5886	1.02663		6.01827	4.78918	5.67048	5.12149	4.36394	14.2322	5.02164	5.66521	11.3226	5.96861	7.27249	5.90138	12.8814	5.22155	6.55444	4.68934	5.28749
	6.02851	0.996033	-0.810188	2.68313	2.11119	2.21478	3.62894	6.5473	0.506836	0.432899	2.53041	1.60326	2.25797	0.500217	1.44038	0.737991	2.02189	2.88912	3.32087	0.285736	0.833515	3.27816	-0.296158	0.345306	3.00688	1.91211	1.93027	1.76579	1.57426	3.88097	1.11646		6.02851	5.01224	5.99453	4.97681	4.73481	14.6997	5.21322	6.05006	11.3607	6.18487	7.47943	6.34713	12.9818	5.36241	6.72807	5.16546	5.43485
	6.03875	1.15563	-0.472244	2.78259	2.28817	2.40658	3.72797	6.68183	0.837986	0.488319	2.70945	1.77316	2.35119	0.602692	1.5171	1.02506	2.09256	3.09161	3.50873	0.298279	0.900475	3.35131	-0.207302	0.325756	3.28633	2.06291	2.24332	1.97733	1.61467	4.21851	1.15818		6.03875	5.40854	6.43067	4.84975	5.13274	15.1386	5.40211	6.4468	11.2774	6.36104	7.67841	6.8064	13.0777	5.59908	6.92301	5.65578	5.55858
	6.04899	1.1994	-0.111908	2.99612	2.57579	2.54752	3.88711	6.7177	1.11395	0.581802	2.78869	1.94928	2.56216	0.748116	1.75325	1.30755	2.13396	3.22047	3.78483	0.335091	1.03751	3.34348	-0.0859222	0.387924	3.58044	2.29676	2.50841	2.17421	1.66853	4.44595	1.21104		6.04899	5.72019	6.89922	4.86852	5.53319	15.5822	5.5971	6.77212	11.2527	6.61156	7.96768	7.15656	13.247	5.77343	7.15825	6.21601	5.80524
	6.05923	1.22623	0.219589	3.20175	2.8564	2.59712	4.13753	6.8658	1.35539	0.683811	2.81358	2.13871	2.79776	0.88623	1.98169	1.58389	2.17105	3.36996	3.92025	0.40081	1.09542	3.41686	0.0704422	0.558144	3.96797	2.45901	2.79623	2.45316	1.89424	4.78559	1.26987		6.05923	5.99009	7.30203	4.90547	5.91165	15.8941	5.92883	7.14162	11.2733	7.05255	8.26493	7.52687	13.3442	5.88526	7.42258	6.76141	6.15843
	6.06947	1.2801	0.606888	3.31755	3.2253	2.6862	4.3901	7.0528	1.60753	0.871185	2.8764	2.31463	2.9355	1.00763	2.12503	1.83913	2.23207	3.57462	4.03443	0.363792	1.23382	3.49213	0.17704	0.670914	4.24598	2.68754	3.1678	2.56834	2.17023	5.05151	1.25998		6.06947	6.3619	7.64121	4.96103	6.42189	16.2915	6.27499	7.4715	11.18	7.38507	8.61353	8.09323	13.4156	6.25692	7.72998	7.25515	6.32707
	6.07971	1.33064	1.17749	3.28749	3.45678	2.81689	4.70169	7.03535	1.90758	0.994629	2.89455	2.58204	3.1621	1.07711	2.39122	1.9988	2.34481	3.72373	4.14396	0.306122	1.40081	3.56425	0.273422	0.829582	4.53002	2.88348	3.41146	2.6874	2.38988	5.26843	1.3233		6.07971	6.63094	8.10155	5.06992	6.83352	16.6289	6.52874	7.71135	11.1658	7.59115	9.08455	8.67516	13.3291	6.51628	8.05662	7.78446	6.60862
	6.08995	1.48824	1.71672	3.29847	3.67897	3.02381	4.96362	7.01014	2.24337	1.11446	2.99731	2.69599	3.37601	1.241	2.59104	2.13678	2.40607	3.99987	4.2211	0.273624	1.48983	3.63604	0.2785	1.02655	4.91358	3.02313	3.51785	2.97923	2.67555	5.49919	1.34467		6.08995	7.00507	8.52678	5.11175	7.27224	16.7862	6.77541	7.89651	11.1554	7.847	9.57264	9.22986	13.2024	6.84172	8.37501	8.35994	6.96206
	6.10019	1.56528	2.23939	3.33871	3.9148	3.19675	5.21891	7.00431	2.49675	1.13972	3.06725	2.92617	3.48986	1.43352	2.70277	2.31712	2.5298	4.31587	4.47643	0.329941	1.52621	3.80267	0.294498	1.1931	5.30711	3.11516	3.72961	3.22292	2.90612	5.67694	1.38153		6.10019	7.43071	8.84558	5.16863	7.73302	16.9803	7.08056	8.21922	11.1722	8.13941	9.92927	9.70191	13.2209	7.23556	8.68002	9.04528	7.28192
	6.11043	1.54457	2.57675	3.45522	4.11982	3.41218	5.38441	6.94956	2.63699	1.14998	3.05419	3.18751	3.61543	1.5484	2.77667	2.47798	2.57801	4.61263	4.66513	0.300926	1.59458	3.93716	0.456871	1.32534	5.59835	3.28783	3.98587	3.56012	2.98498	5.8366	1.4301		6.11043	7.88221	9.18366	5.19444	8.26502	17.1887	7.43819	8.60286	11.1705	8.43692	10.1568	10.228	13.2946	7.5689	8.99753	9.6191	7.62182
	6.12067	1.80607	2.91563	3.58304	4.34299	3.60729	5.58294	7.05768	2.86707	1.23064	3.15396	3.46159	3.77573	1.69884	2.86025	2.74944	2.56378	4.8422	4.9591	0.341801	1.76657	4.07072	0.692513	1.49046	5.75954	3.3997	4.1935	3.80869	3.15392	5.99652	1.45914		6.12067	8.2989	9.56703	5.30515	8.80261	17.4138	7.7449	8.89776	11.2563	8.5856	10.3167	10.9101	13.3724	7.83117	9.35783	10.0659	7.89027
	6.13091	1.95946	3.26611	3.62536	4.53971	3.77879	5.62269	7.08179	3.10698	1.33934	3.1873	3.62084	4.00869	2.02994	3.0576	3.04034	2.59329	4.9526	5.05964	0.432281	1.83182	4.12906	0.910858	1.61935	5.98857	3.44061	4.4763	4.09492	3.13944	6.20368	1.43868		6.13091	8.61171	10.1063	5.46053	9.27348	17.4407	8.01645	9.18643	11.3826	8.83875	10.602	11.5296	13.3838	8.11915	9.64467	10.6301	8.14189
	6.14115	2.24618	3.68609	3.71225	4.67648	3.92497	5.79242	6.93238	3.23499	1.43201	3.11463	3.74742	4.14865	2.19743	3.06464	3.46819	2.69328	5.27553	5.20326	0.578636	1.81547	4.09356	1.1513	1.72276	6.16507	3.63034	4.70338	4.27369	3.26896	6.44442	1.44873		6.14115	8.97184	10.5334	5.57905	9.87883	17.3821	8.35142	9.52091	11.4314	9.2405	10.9406	12.0206	13.3925	8.40038	10.0294	11.2283	8.50513
	6.15139	2.38416	4.07011	3.75391	4.77223	4.07821	6.00543	6.89499	3.23942	1.56021	3.13983	3.91522	4.23301	2.29174	3.19897	3.78541	2.84385	5.51547	5.36133	0.650623	1.81866	4.20666	1.24915	1.86567	6.35888	3.71492	4.92194	4.40273	3.2877	6.6036	1.48037		6.15139	9.23435	10.9219	5.66575	10.4827	17.3585	8.63472	9.92025	11.4019	9.6509	11.4166	12.4756	13.3812	8.61818	10.3835	11.8649	8.84976
	6.16163	2.58934	4.52812	3.77576	4.959	4.28897	6.3013	6.8833	3.41615	1.66362	3.168	4.12151	4.39507	2.44773	3.32615	4.06086	2.8644	5.68667	5.52914	0.800686	1.77969	4.18993	1.36129	2.06899	6.63389	3.73091	5.04522	4.48323	3.51838	6.73004	1.52928		6.16163	9.55291	11.2807	5.67434	11.1096	17.1949	8.92921	10.2763	11.4362	9.99642	11.9054	13.0074	13.3583	8.99869	10.6499	12.5038	9.20125
	6.17187	2.55711	4.89293	3.79166	5.0908	4.44433	6.50144	6.86942	3.68872	1.77261	3.26743	4.17181	4.5676	2.62794	3.40448	4.37057	2.80283	5.88758	5.61233	0.905983	1.79761	4.11024	1.72776	2.22372	6.80542	3.82259	5.24241	4.54042	3.85622	6.90273	1.57882		6.17187	9.88486	11.7079	5.6433	11.7974	16.8479	9.20655	10.5966	11.5675	10.273	12.2972	13.6952	13.3621	9.35417	10.809	13.1847	9.55795
	6.18211	2.67723	5.24562	3.88846	5.32073	4.48121	6.67001	6.85999	3.99104	1.9296	3.34292	4.30682	4.73967	2.85691	3.57568	4.54923	2.76977	6.14849	5.74103	1.15921	1.81409	4.04432	1.92899	2.46232	6.98271	3.90425	5.44023	4.68172	4.11065	6.89458	1.69		6.18211	10.1637	12.2164	5.78773	12.4261	16.534	9.43291	10.9104	11.5084	10.5229	12.6547	14.3728	13.2208	9.64298	11.0199	13.8357	9.79672
	6.19235	2.74991	5.54921	3.867	5.37263	4.55472	6.77648	6.758	4.13652	2.08235	3.34541	4.53177	4.91501	3.01844	3.80359	4.61681	2.64315	6.32539	5.83572	1.46903	1.86466	3.96257	2.0387	2.66994	7.1096	3.88525	5.54985	4.82797	4.28589	6.88288	1.79839		6.19235	10.2886	12.7479	5.90964	13.0751	16.1772	9.72469	11.2765	11.4079	10.8299	13.0596	14.9876	13.0852	9.86031	11.2505	14.5523	10.044
	6.20259	2.85483	5.76164	3.86939	5.50558	4.60645	6.96154	6.68339	4.28236	2.14012	3.2263	4.67029	4.99839	3.26109	4.01092	4.65754	2.67374	6.51005	5.76868	1.61963	1.97531	3.97358	2.2655	2.73397	7.20301	3.90164	5.71617	5.05685	4.30156	6.8479	1.92667		6.20259	10.5031	13.2101	6.07172	13.7304	15.6746	10.0407	11.6613	11.4715	11.1914	13.5788	15.7047	12.8979	10.1164	11.36	15.3392	10.2809
	6.21283	2.9016	6.02486	3.82275	5.54366	4.70108	7.19134	6.65742	4.34235	2.32938	3.17363	4.67011	5.10342	3.50873	4.05988	4.95057	2.66784	6.57253	5.84408	1.6917	2.01425	4.01824	2.52946	2.88239	7.19081	3.84937	5.80587	5.26742	4.47228	6.69271	2.04745		6.21283	10.7143	13.6331	6.12001	14.3777	15.2239	10.2535	12.0604	11.6093	11.3679	14.0095	16.4369	12.6818	10.3041	11.5913	15.9948	10.4132
	6.22307	3.07712	6.32987	3.76442	5.60488	4.8601	7.3933	6.62593	4.36144	2.44375	3.09855	4.77051	5.10596	3.66079	4.16919	5.33947	2.66242	6.64438	5.77265	1.90173	1.96618	3.99345	2.83025	3.08818	7.15752	3.93023	5.89491	5.45077	4.54936	6.66403	2.13932		6.22307	10.908	14.0513	6.21089	15.0426	14.8004	10.5869	12.3972	11.6349	11.5041	14.316	17.1447	12.4758	10.6055	11.6852	16.7722	10.6664
	6.23331	3.22058	6.56311	3.80115	5.62883	5.04026	7.50483	6.59209	4.4887	2.63913	3.0244	4.87737	5.13077	3.9156	4.32402	5.6158	2.741	6.7323	5.74781	2.06434	1.93644	3.98272	3.02759	3.29422	7.1436	4.05726	5.9187	5.58099	4.6155	6.67097	2.28266		6.23331	11.1043	14.5855	6.29188	15.69	14.4131	10.8311	12.7875	11.5382	11.7445	14.6989	17.8873	12.3939	10.7851	11.772	17.4739	10.9152
	6.24355	3.26963	6.79043	3.83055	5.71865	5.14937	7.65074	6.56423	4.60496	2.64044	2.91792	5.00632	5.14058	4.17245	4.37743	5.78888	2.80637	6.7667	5.65666	2.22031	1.97275	3.89601	3.15528	3.55692	7.10133	4.20197	5.94185	5.70938	4.67598	6.64711	2.32215		6.24355	11.3573	15.1608	6.44976	16.3473	14.0506	10.9844	13.2096	11.47	11.9812	15.0682	18.5561	12.731	11.0434	11.8818	18.2608	11.1983
	6.25379	3.34437	7.01404	3.74697	5.83834	5.20934	7.67998	6.62854	4.71598	2.69413	2.93206	4.94886	5.2409	4.23716	4.4316	5.84808	2.96073	6.87358	5.56425	2.43576	1.87678	3.78986	3.29534	3.71186	7.06176	4.17852	6.07771	5.93491	4.69658	6.62467	2.39172		6.25379	11.619	15.6361	6.58401	17.0293	13.6311	11.1674	13.7273	11.3395	12.0977	15.445	19.1115	12.6393	11.4178	12.0339	18.9774	11.3303
	6.26403	3.41893	7.22219	3.67989	5.90284	5.36515	7.75029	6.56343	4.73992	2.7766	2.87631	5.012	5.24021	4.2232	4.33772	5.98847	2.9936	6.98455	5.57313	2.63779	1.98188	3.62878	3.50217	3.77733	7.01325	4.0971	6.28195	6.14283	4.72745	6.63491	2.49423		6.26403	11.7335	16.1526	6.68387	17.7246	13.1918	11.4235	14.1913	11.2887	12.337	15.779	19.6848	12.3357	11.6499	12.1461	19.5807	11.5135
	6.27427	3.42336	7.35392	3.66738	6.01443	5.38204	7.83872	6.47111	4.70424	2.89179	2.83495	5.09133	5.23938	4.24818	4.42313	6.11595	3.12296	7.17978	5.52576	2.78743	2.05329	3.431	3.71105	3.88215	7.08797	4.13611	6.38134	6.22195	4.70432	6.58427	2.42731		6.27427	11.7819	16.5043	6.75437	18.3909	12.8152	11.7179	14.5713	11.2157	12.5935	15.9945	20.1907	11.8978	11.7671	12.1716	20.1427	11.6974
	6.28451	3.50588	7.51652	3.59409	5.99763	5.39834	7.96892	6.34687	4.72446	2.9798	2.78737	5.12001	5.20815	4.32315	4.47599	6.34989	3.10637	7.20837	5.53445	2.89283	2.14468	3.38772	3.78569	3.9244	7.12208	4.13576	6.35727	6.15784	4.69131	6.58329	2.37177		6.28451	11.835	16.9647	6.70806	19.0406	12.3349	12.0236	14.8812	11.0281	12.8798	16.2788	20.6106	11.5462	11.921	12.2603	20.5618	11.9672
	6.29475	3.64545	7.63014	3.55003	5.93466	5.35607	8.08405	6.21054	4.74773	2.98472	2.6954	5.15893	5.20275	4.42773	4.52105	6.45948	3.00742	7.18638	5.50244	2.95309	2.22684	3.33004	3.88525	4.09579	7.11217	4.17759	6.29045	6.0721	4.62367	6.39172	2.43892		6.29475	12.0566	17.3974	6.76951	19.7287	11.8155	12.2081	15.2747	10.7937	13.1465	16.5823	21.0549	11.2931	12.078	12.3509	21.003	12.0841
	6.30499	3.73816	7.68254	3.45717	5.84859	5.2867	8.1437	6.08141	4.82997	2.98853	2.66333	5.27289	5.07687	4.47381	4.53872	6.57764	3.02182	7.16468	5.37045	3.0768	2.37242	3.20722	4.12251	4.09624	7.02308	4.23823	6.29692	5.9943	4.55951	6.27806	2.50182		6.30499	12.2395	17.6934	6.94677	20.2355	11.3462	12.249	15.6432	10.5065	13.3368	16.8441	21.3993	10.9432	12.2431	12.5601	21.4005	12.1817
	6.31523	3.7677	7.79621	3.41434	5.86286	5.20167	8.19405	6.0782	4.83269	3.13026	2.54764	5.28919	4.96097	4.61835	4.51311	6.71239	3.05356	7.19788	5.16433	3.2	2.52206	2.96872	4.2991	4.12563	6.92915	4.21962	6.27735	6.02444	4.6	6.15657	2.57455		6.31523	12.4444	18.0111	7.06174	20.7535	10.827	12.4941	15.9737	10.28	13.5641	16.9981	21.7018	10.6566	12.4027	12.7016	21.7637	12.2277
	6.32547	3.86582	7.79589	3.38463	5.89195	5.15303	8.26809	6.038	4.8309	3.22556	2.37289	5.22719	5.02818	4.81866	4.34697	6.73166	3.15354	7.17976	4.99863	3.28871	2.43155	2.8495	4.4807	4.13404	6.86855	4.24594	6.37088	6.06182	4.52031	6.05531	2.68028		6.32547	12.6188	18.3111	6.98429	21.2422	10.3998	12.685	16.09	10.0218	13.7507	17.1773	21.9519	10.3792	12.6209	12.6667	22.0872	12.1987
	6.33571	3.86195	7.80236	3.32722	5.78561	5.12395	8.26967	5.91113	4.85839	3.13166	2.20063	5.11941	4.99941	4.91837	4.29397	6.7392	3.22432	7.1823	4.9248	3.38463	2.46299	2.6447	4.63633	4.07277	6.81253	4.28156	6.30685	6.0632	4.40778	5.99022	2.72409		6.33571	12.6486	18.6423	6.92031	21.5354	9.97226	12.8943	16.654	9.7968	14.0346	17.3183	22.1215	10.051	12.7946	12.7013	22.32	12.279
	6.34595	3.85413	7.84781	3.23612	5.72213	5.15556	8.20421	5.7689	4.87663	3.12199	2.16444	5.06651	5.04099	5.0236	4.26053	6.82928	3.26535	7.17643	4.66366	3.40533	2.4519	2.50809	4.77439	3.9869	6.75837	4.20695	6.19548	5.95416	4.22174	5.84861	2.72806		6.34595	12.7964	18.8459	6.82005	21.7035	9.58249	13.0796	17.1537	9.6895	14.2332	17.3369	22.1234	9.76308	12.9751	12.7497	22.4483	12.2478
	6.35619	3.85995	7.86151	3.05871	5.679	5.04635	8.18401	5.62793	4.94597	3.16569	2.00763	5.0208	4.93931	5.02638	4.12157	6.72082	3.30755	6.95565	4.52702	3.41728	2.56296	2.36767	4.99469	3.96486	6.66465	4.25882	6.17785	5.88974	3.9826	5.75427	2.66263		6.35619	12.8527	18.9168	6.8	21.8951	9.21877	13.2316	17.2113	9.65181	14.3776	17.335	22.0247	9.61806	13.2556	12.7599	22.4627	12.3343
	6.36643	3.83253	7.92953	3.00447	5.47778	4.9004	8.17011	5.49901	4.99347	3.20103	1.91788	5.03126	4.79788	5.01874	4.15837	6.66718	3.40173	6.70209	4.43422	3.45277	2.74079	2.27309	5.07495	3.93655	6.63956	4.31701	6.16719	5.72527	3.86564	5.62607	2.63249		6.36643	12.9142	18.9515	6.77814	21.9236	9.00791	13.3515	17.1058	9.46618	14.437	17.2582	21.9382	9.36182	13.3627	12.7319	22.4119	12.3204
	6.37667	3.81871	7.95924	2.80863	5.35946	4.76429	8.07158	5.37882	4.9079	3.11504	1.84851	5.03538	4.68946	4.97501	4.10058	6.6722	3.51743	6.55946	4.37992	3.4865	2.84759	2.16766	5.15912	4.02356	6.53505	4.27981	6.10284	5.54303	3.68256	5.52229	2.60531		6.37667	13.029	18.8497	6.90697	21.9163	8.72562	13.4216	16.9668	9.23361	14.5484	17.0156	21.7829	9.03063	13.6211	12.7281	22.2968	12.2621
	6.38691	3.73136	7.98517	2.64018	5.26405	4.63045	8.00105	5.30429	4.84153	3.0404	1.70318	5.01483	4.56386	4.91146	3.97957	6.59898	3.54586	6.50633	4.25592	3.49822	2.83382	1.96791	5.26371	4.12965	6.36156	4.25682	6.03146	5.47942	3.54882	5.44211	2.44986		6.38691	13.1194	18.6967	6.93068	21.8614	8.35099	13.5259	16.8103	8.94365	14.6305	16.7674	21.6184	8.74453	13.8784	12.8092	22.068	12.1844
	6.39715	3.73524	7.8985	2.45439	5.27419	4.64483	7.80744	5.29345	4.73786	2.89761	1.63169	4.96787	4.43511	4.74561	3.91977	6.50969	3.59717	6.3824	4.059	3.45498	2.84402	1.90142	5.38924	4.15754	6.16572	4.35307	5.86416	5.3521	3.48578	5.31252	2.37774		6.39715	13.1509	18.6056	6.88466	21.7647	7.90679	13.599	16.6291	8.70258	14.5677	16.5264	21.3454	8.50845	13.9453	12.8413	21.7087	12.1208
	6.40739	3.66791	7.84432	2.29589	5.17459	4.59882	7.68286	5.31695	4.65176	2.81993	1.60247	4.84585	4.42598	4.64238	3.78139	6.45836	3.52719	6.21667	3.7961	3.35661	2.93824	1.69868	5.38786	4.02274	6.00945	4.40717	5.8082	5.37235	3.21862	5.22392	2.41397		6.40739	13.1547	18.4921	6.74228	21.6239	7.51237	13.6386	16.5813	8.44458	14.4854	16.3011	20.9561	8.24872	14.0841	12.9073	21.2474	11.9805
	6.41763	3.55671	7.73099	2.23136	4.95406	4.60352	7.49936	5.16705	4.56237	2.82278	1.63916	4.73715	4.41546	4.51724	3.715	6.3198	3.48996	6.08183	3.4532	3.13631	3.00764	1.54531	5.421	3.92043	5.89816	4.34897	5.7094	5.23086	2.95411	5.1377	2.37155		6.41763	13.0728	18.1452	6.75148	21.3768	7.15824	13.6379	16.4441	8.16772	14.4046	16.108	20.4504	8.02909	14.1881	12.8922	20.7844	11.9031
	6.42787	3.35098	7.60581	2.04807	4.68053	4.48708	7.39402	4.95769	4.43199	2.71756	1.57706	4.70945	4.28625	4.49624	3.5041	6.18956	3.37713	5.96166	3.19181	3.13911	2.94225	1.33516	5.51972	3.8389	5.86255	4.34808	5.49973	5.03705	2.77203	5.08693	2.20467		6.42787	12.9371	17.7448	6.75512	21.0145	6.8147	13.8801	16.1355	7.8566	14.3126	15.7503	19.9638	7.60146	14.3324	12.814	20.2493	11.7768
	6.43811	3.23783	7.50264	1.9255	4.47685	4.34447	7.28374	4.70153	4.40123	2.63145	1.46861	4.68052	4.08212	4.44028	3.39023	5.97703	3.26956	5.73026	3.01843	3.14054	2.92875	1.14688	5.55927	3.81678	5.7274	4.25177	5.28471	4.85777	2.65511	4.94367	2.01182		6.43811	12.8621	17.2764	6.65831	20.6155	6.4304	14.0221	15.715	7.59267	14.1673	15.2834	19.3863	7.26063	14.4019	12.8155	19.7236	11.627
	6.44835	3.13683	7.40796	1.80602	4.29067	4.18197	7.13492	4.43773	4.19312	2.61232	1.4025	4.60461	3.96386	4.37984	3.20541	5.88709	3.20558	5.54483	2.89481	3.21726	2.95687	1.12294	5.52686	3.79947	5.59501	4.31585	5.14908	4.94559	2.54236	4.73578	1.84793		6.44835	12.7629	16.8725	6.65752	20.1454	6.08106	14.095	15.4006	7.28239	13.8673	14.6918	18.7821	6.959	14.4296	12.6635	19.1342	11.3913
	6.45859	3.08858	7.29901	1.75077	4.21249	3.98219	6.92954	4.23413	3.99549	2.65209	1.28546	4.37807	3.82631	4.3148	3.54277	5.73391	3.1167	5.38713	2.79862	3.25373	3.00614	1.07695	5.38192	3.69555	5.52401	4.305	5.00776	4.86349	2.41983	4.57282	1.70451		6.45859	12.6699	16.2801	6.65832	19.5417	5.80204	14.101	15.0444	6.95936	13.5388	14.1481	18.1033	6.73763	14.3859	12.4898	18.5091	11.2857
	6.46883	2.98267	7.10221	1.68653	4.0756	3.85055	6.67602	4.0564	3.73116	2.57862	1.16808	4.16183	3.72637	4.24804	3.69665	5.36889	3.00553	5.26625	2.63421	3.1444	2.91424	0.952831	5.31389	3.56892	5.29634	4.15668	4.82806	4.70523	2.31158	4.35233	1.78602		6.46883	12.4605	15.7344	6.6438	18.8433	5.4965	14.0166	14.7183	6.71462	13.2248	13.6297	17.2781	6.38685	14.2623	12.3307	17.8194	11.2428
	6.47907	2.93711	6.97307	1.71111	3.88972	3.72513	6.38546	3.96934	3.49745	2.33834	1.12265	3.94064	3.58096	4.0882	3.47639	5.18923	2.86089	5.11757	2.46642	2.875	2.87648	0.747219	5.31235	3.41127	5.20124	4.04362	4.66533	4.49828	2.17632	4.26314	1.73321		6.47907	12.2481	15.0899	6.6308	18.0675	5.28159	13.9207	14.3208	6.39096	12.9873	13.124	16.5048	6.04359	14.1247	12.0755	17.0483	11.0595
	6.48931	2.66923	6.94877	1.74942	3.64354	3.56019	6.05485	3.78784	3.42862	2.15078	1.19556	3.74029	3.45575	3.97321	3.19918	4.95688	2.81218	4.91945	2.36348	2.67719	2.83529	0.560631	5.35355	3.30344	5.02395	3.96797	4.45453	4.33946	2.01742	4.15728	1.66155		6.48931	11.9297	14.4033	6.62206	17.3667	5.04215	13.9002	13.9101	6.22105	12.5279	12.6509	15.6464	5.83003	14.0307	11.7197	16.3016	10.8366
	6.49955	2.4948	6.89381	1.75709	3.31073	3.40429	5.77652	3.50019	3.29256	2.05125	1.17973	3.60511	3.33574	3.82969	2.98624	4.75695	2.82811	4.71775	2.30595	2.5555	2.81344	0.495319	5.32117	3.2337	4.98278	3.85699	4.33705	4.23255	1.7667	4.06042	1.41545		6.49955	11.6254	13.6969	6.68628	16.6678	4.77591	13.7339	13.3629	6.13506	12.1349	12.0708	14.8117	5.60509	13.8771	11.3961	15.6476	10.5514
	6.50979	2.26904	6.68868	1.75438	3.10414	3.31857	5.49425	3.28387	3.17004	2.02193	1.08366	3.49934	3.31098	3.67448	2.73827	4.44603	2.69825	4.56878	2.16911	2.48209	2.84778	0.369789	5.25563	3.183	4.93357	3.72954	4.17937	4.03759	1.60982	3.9378	1.331		6.50979	11.2828	13.0205	6.70225	15.9556	4.54437	13.5598	12.8099	5.97525	11.7336	11.4819	14.0567	5.39811	13.6628	11.0467	14.9344	10.3369
	6.52003	2.21214	6.51141	1.71516	2.92879	3.26878	5.28428	3.04578	3.0144	1.94883	1.08403	3.32961	3.2504	3.5468	2.50726	4.24722	2.63559	4.32732	2.08746	2.3878	2.91911	0.235573	5.25299	2.98567	4.77357	3.64372	4.00262	3.78925	1.49471	3.81571	1.23843		6.52003	11.0051	12.3923	6.73292	15.0905	4.31451	13.3244	12.2743	5.79856	11.3177	10.9382	13.328	5.12618	13.4768	10.7121	14.1397	10.0832
	6.53027	2.08504	6.26917	1.53079	2.67966	3.15072	5.14338	2.85669	2.85403	1.98323	1.1284	3.16069	3.18698	3.4137	2.40454	3.96158	2.47217	4.11015	2.06255	2.24998	2.98936	0.121193	5.12101	2.72504	4.77475	3.43913	3.83722	3.45329	1.34668	3.58337	1.18568		6.53027	10.6201	11.711	6.81954	14.2747	3.97372	13.2242	11.7844	5.68594	10.819	10.3735	12.4936	4.88766	13.1261	10.4013	13.3753	9.93401
	6.54051	1.9004	6.22217	1.42935	2.42188	3.06735	5.01873	2.64372	2.78222	1.8996	0.97913	2.95916	3.0903	3.32487	2.30068	3.7408	2.30844	3.87004	2.10922	2.13155	2.97134	-0.0981293	5.01017	2.53344	4.6714	3.35843	3.68897	3.24109	1.22992	3.37056	0.995617		6.54051	10.306	11.0099	6.80595	13.4748	3.7066	13.0007	11.2765	5.55122	10.3454	9.82233	11.7354	4.64632	12.8617	10.1372	12.5745	9.59797
	6.55075	1.70245	6.24147	1.39005	2.13095	2.94869	4.75923	2.44013	2.58356	1.72888	0.945976	2.67548	2.94376	3.2511	2.10455	3.43545	2.23965	3.76418	2.00676	2.0345	3.02258	-0.247437	4.98474	2.43389	4.50501	3.24852	3.51299	3.13414	1.02479	3.16971	0.802666		6.55075	10.0193	10.4178	6.86904	12.8118	3.5048	12.8364	10.8077	5.47896	9.85265	9.27098	11.0519	4.27187	12.659	9.75239	11.906	9.29998
	6.56099	1.6123	6.17177	1.36116	2.01327	2.8749	4.54994	2.18106	2.30391	1.96399	1.08305	2.56473	2.77907	3.28432	1.94183	3.1307	2.16543	3.58871	1.85909	2.00782	3.05565	-0.449928	4.89009	2.35289	4.37146	3.18945	3.38522	3.10737	0.936298	3.12727	0.678745		6.56099	9.48517	9.73254	6.90625	12.0769	3.26746	12.7216	10.3907	5.35176	9.36648	8.82067	10.3699	4.00409	12.332	9.31739	11.2442	8.98195
	6.57123	1.52085	5.98933	1.40463	1.89563	2.75815	4.34671	2.00533	2.10636	2.16269	1.14191	2.40335	2.76773	3.26353	1.8946	2.87066	2.15869	3.38795	1.75774	1.96962	3.08098	-0.570541	4.76029	2.25444	4.33586	3.14612	3.32085	3.04457	0.739578	3.07798	0.60157		6.57123	8.91191	9.07763	6.96341	11.3934	3.05068	12.4381	9.94191	5.15207	8.95794	8.41211	9.65115	3.74748	11.957	8.86304	10.515	8.68301
	6.58147	1.45129	5.76808	1.29024	1.66763	2.61252	4.18684	1.76612	1.87962	1.96369	1.10964	2.14522	2.65382	3.26892	1.80856	2.57324	2.17809	3.1743	1.6136	1.9455	3.03286	-0.673515	4.51795	2.1955	4.24867	3.12548	3.23991	2.85708	0.570885	2.99955	0.588242		6.58147	8.35949	8.51247	7.00155	10.6497	2.83689	11.9804	9.47967	5.05634	8.45401	7.95734	8.91986	3.64807	11.4202	8.48606	9.86055	8.5279
	6.59171	1.31271	5.74516	1.26114	1.52177	2.55775	3.98933	1.59215	1.71915	1.63545	0.980953	2.07081	2.52797	3.18107	1.718	2.36072	2.18156	2.91868	1.51847	1.83987	3.09836	-0.797768	4.32022	2.11716	4.12647	2.97786	3.10626	2.60358	0.4692	2.92422	0.439003		6.59171	7.85472	7.93467	6.98664	9.98569	2.60921	11.5645	9.06179	4.95943	8.02283	7.52005	8.38717	3.63194	10.9654	7.99467	9.19253	8.46001
	6.60195	1.13191	5.55911	1.27181	1.27917	2.42113	3.77957	1.46759	1.65167	1.34814	0.944962	2.02896	2.39661	3.02196	1.6221	2.14983	2.09438	2.63235	1.48583	1.81616	3.16901	-0.814575	4.15966	1.97733	3.86691	2.89465	2.9637	2.38305	0.403168	2.77573	0.322777		6.60195	7.48936	7.35607	6.97629	9.35661	2.41885	11.1977	8.65646	4.91095	7.56367	6.95658	7.82307	3.48864	10.4991	7.44314	8.50623	8.30482
	6.61219	0.933044	5.2926	1.2852	1.06851	2.27337	3.61552	1.26199	1.56115	1.24379	0.987034	1.82166	2.21484	2.80394	1.54969	2.0191	1.95396	2.38743	1.44643	1.81516	3.15491	-0.93647	4.05908	1.75188	3.60052	2.88661	2.80751	2.3235	0.330059	2.66684	0.174835		6.61219	7.16992	6.69742	6.81859	8.82706	2.14183	10.6816	8.29253	4.91037	6.98866	6.48863	7.29267	3.29698	9.99044	6.98852	7.89474	8.06166
	6.62243	0.797466	5.23544	1.13955	0.869598	2.16356	3.4677	1.1361	1.33064	1.13175	0.962475	1.64184	2.1599	2.70395	1.54924	1.75864	1.93076	2.21682	1.4169	1.87166	3.186	-1.00535	3.93094	1.64234	3.4286	2.75001	2.63831	2.11846	0.172726	2.46236	0.06633		6.62243	6.73481	6.22997	6.78244	8.19638	1.82872	10.2912	7.98292	5.0023	6.54747	6.02179	6.7364	3.09856	9.42281	6.54171	7.3296	7.89729
	6.63267	0.699059	5.11436	0.98571	0.821869	2.12838	3.23838	1.03162	1.1286	1.03799	0.936607	1.52472	2.07182	2.51328	1.63285	1.57657	1.91885	2.11646	1.42036	1.84714	3.2363	-1.13297	3.76841	1.49841	3.2915	2.43132	2.44526	1.90321	0.0914001	2.31233	-0.0417175		6.63267	6.39829	5.83032	6.77791	7.5778	1.55184	9.83309	7.63378	5.04594	6.28754	5.64727	6.18554	3.01104	8.85882	6.18023	6.82048	7.75402
	6.64291	0.511017	4.98773	0.994553	0.784031	2.03603	2.99985	1.00068	0.954357	0.971176	0.848358	1.41916	1.93478	2.38564	1.64353	1.39182	1.94005	2.00343	1.50463	1.77419	3.28362	-1.16584	3.67896	1.43408	3.18289	2.2428	2.25513	1.54453	0.00868225	2.13142	-0.154789		6.64291	6.08434	5.48674	6.70802	7.05791	1.34392	9.33121	7.39793	4.98479	6.0542	5.30183	5.77292	2.84924	8.28772	5.76492	6.44241	7.51533
	6.65315	0.429466	4.86231	0.989738	0.698307	1.96688	2.89874	0.802177	0.808422	0.924652	0.792984	1.1732	1.82634	2.30484	1.71707	1.19629	1.94223	1.8501	1.58223	1.68185	3.35653	-1.34386	3.47958	1.34409	3.10734	2.22404	2.28827	1.39859	-0.05159	1.94202	-0.269875		6.65315	5.74791	5.12653	6.68754	6.4573	1.14439	8.93996	7.16628	4.84039	5.67784	4.915	5.34673	2.62759	7.83583	5.35971	5.98592	7.37229
	6.66339	0.373711	4.79706	0.964096	0.501755	1.92632	2.88362	0.625912	0.714912	0.907486	0.823109	1.05079	1.75935	2.16206	1.73064	0.899628	1.88752	1.71162	1.64476	1.60259	3.26193	-1.44038	3.30058	1.26559	3.08494	2.25904	2.2764	1.33463	-0.132832	1.8653	-0.286839		6.66339	5.29943	4.77189	6.72954	5.89703	0.963955	8.48963	6.95774	4.64547	5.29256	4.6868	4.90035	2.42	7.43097	5.06526	5.41465	7.22883
	6.67363	0.404182	4.67968	0.944656	0.44252	1.8995	2.70727	0.527328	0.559486	0.848907	0.867191	0.922264	1.72049	2.07441	1.88874	0.659721	1.81781	1.58763	1.74689	1.46628	3.2644	-1.62677	3.13094	1.2832	2.93614	2.19251	2.21874	1.21639	-0.273941	1.74643	-0.339886		6.67363	5.15656	4.5069	6.64325	5.41618	0.937588	8.12094	6.76852	4.54858	4.92404	4.40271	4.48577	2.18185	6.91476	4.85701	4.96737	6.9293
	6.68387	0.393456	4.55151	0.901333	0.444798	1.91639	2.53395	0.528732	0.482765	0.789024	0.897007	0.808586	1.68724	2.05994	1.9309	0.616554	1.67627	1.471	1.69643	1.30631	3.23111	-1.73129	3.08807	1.26234	2.97694	1.95601	2.14159	1.26488	-0.378521	1.64564	-0.353294		6.68387	4.91865	4.18353	6.46793	5.03228	0.77087	7.71574	6.55108	4.49403	4.63356	4.18288	4.07177	2.02581	6.49959	4.44625	4.56783	6.69199
	6.69411	0.376587	4.42428	0.833492	0.465755	1.80036	2.33923	0.468662	0.530891	0.821869	1.00012	0.701229	1.68291	1.87933	1.90658	0.6493	1.6664	1.35987	1.79215	1.33239	3.26574	-1.77215	3.0433	1.27609	2.94683	1.77751	1.98983	1.21888	-0.332817	1.47831	-0.255447		6.69411	4.71782	3.92365	6.30004	4.77695	0.559765	7.29598	6.42335	4.45115	4.35932	3.97238	3.59153	1.93809	6.07186	4.09633	4.2639	6.43661
	6.70435	0.403778	4.25525	0.809326	0.414482	1.74155	2.38666	0.393929	0.47826	0.89529	1.06025	0.560059	1.59163	1.8008	1.89779	0.645809	1.75691	1.36356	1.97778	1.29971	3.35874	-1.75721	2.94941	1.21112	2.89	1.72656	1.97989	1.20075	-0.366898	1.47861	-0.133369		6.70435	4.50091	3.65807	6.21358	4.53323	0.448067	6.90345	6.3047	4.47445	4.05996	3.81941	3.34802	1.81903	5.65611	3.86847	3.97798	6.29283
	6.71459	0.398235	4.24816	0.675385	0.32193	1.68704	2.30923	0.283508	0.457981	0.851837	1.03923	0.515156	1.53524	1.60507	1.87746	0.477901	1.77777	1.3658	2.10475	1.27913	3.39346	-1.75857	2.87643	1.14708	2.88275	1.77584	1.92915	1.13736	-0.392231	1.41752	-0.108047		6.71459	4.33888	3.46612	6.14965	4.12645	0.230556	6.53135	6.0114	4.48684	3.67418	3.72153	3.0762	1.59398	5.16723	3.63617	3.67746	6.17636
	6.72483	0.357979	4.22054	0.691967	0.363735	1.62239	2.24108	0.274986	0.396019	0.825146	1.01023	0.38512	1.5875	1.48756	1.86206	0.503757	1.83611	1.26107	2.16853	1.24693	3.42673	-1.90202	2.79625	1.16797	2.72429	1.68407	1.88209	1.15524	-0.441761	1.23648	-0.182255		6.72483	4.09439	3.25686	6.15023	3.77373	0.0795059	5.96253	5.80617	4.37161	3.39213	3.59054	2.88157	1.39877	4.7213	3.42146	3.45872	6.05215
	6.73507	0.428146	4.1531	0.582077	0.511124	1.52635	2.17352	0.344521	0.546303	0.782768	0.920849	0.300125	1.59495	1.38432	2.02567	0.666763	1.85022	1.09541	2.16308	1.12713	3.47677	-1.96504	2.61286	1.10889	2.69345	1.60299	1.78311	1.20383	-0.482414	1.12679	-0.188931		6.73507	3.87455	3.05477	6.1143	3.49908	-0.072319	5.46735	5.73997	4.29239	3.21769	3.35922	2.63342	1.39266	4.36117	3.19053	3.19986	5.83928
	6.74531	0.468662	4.09956	0.463051	0.651661	1.39921	2.09027	0.320961	0.630814	0.777618	0.797729	0.224903	1.38174	1.26815	2.26344	0.882584	1.82092	1.03819	2.15337	1.05877	3.45322	-2.1157	2.52916	1.11393	2.79089	1.45131	1.76619	1.22265	-0.459751	1.10016	-0.082119		6.74531	3.62529	2.80554	6.08527	3.20638	-0.150616	5.02381	5.6573	4.25411	3.14842	3.13655	2.43264	1.32732	3.93181	3.05261	2.89697	5.64641
	6.75555	0.556915	3.96735	0.428276	0.798706	1.30324	2.0036	0.327438	0.664883	0.895088	0.778915	0.16748	1.15788	1.22697	2.29906	0.968307	1.71515	1.0573	2.25293	1.08792	3.50404	-2.10088	2.59123	1.27974	2.88712	1.37894	1.67575	1.14532	-0.470943	1.06339	0.0774422		6.75555	3.42968	2.59517	6.07259	2.9416	-0.104328	4.64649	5.5514	4.19869	2.9347	3.01883	2.26844	1.22509	3.6056	2.81382	2.63434	5.44603
	6.76579	0.633266	4.04339	0.507275	0.777573	1.20866	1.80767	0.506786	0.609093	0.927429	0.787094	0.186901	1.13576	1.1527	2.49557	1.075	1.65682	0.999073	2.55895	1.08213	3.55334	-2.15176	2.5692	1.41449	2.87793	1.29128	1.59892	1.13605	-0.433464	0.976948	0.241043		6.76579	3.25281	2.36737	5.93948	2.69522	-0.0554276	4.25456	5.51118	4.3096	2.79952	2.82987	2.08509	1.1259	3.31228	2.69534	2.40924	5.18864
	6.77603	0.745014	4.0692	0.530735	0.768402	1.06895	1.68698	0.57122	0.510006	0.904362	0.939323	0.192669	1.09519	1.12522	2.77299	1.12917	1.58527	0.936214	2.61411	1.04986	3.48405	-2.2073	2.41256	1.60368	2.92589	1.28245	1.60504	1.21635	-0.395065	0.842598	0.475136		6.77603	3.07155	2.20199	5.83046	2.53729	-0.107616	3.86701	5.47346	4.28771	2.74618	2.63905	1.84807	1.04647	2.96212	2.61337	2.16957	4.83546
	6.78627	0.903217	4.11794	0.427498	0.901215	0.998764	1.6495	0.605671	0.549904	0.955109	1.00082	0.272205	1.07703	0.992134	2.93874	1.14689	1.54708	0.882286	2.65368	1.03503	3.49597	-2.23982	2.23371	1.6198	2.97745	1.20348	1.5773	1.31485	-0.330051	0.906517	0.71545		6.78627	2.93069	2.01462	5.74923	2.3061	-0.137669	3.54639	5.33136	4.30056	2.64108	2.41389	1.67988	0.965923	2.71048	2.31124	1.99448	4.63867
	6.79651	0.963501	4.04794	0.31958	1.04547	0.90044	1.61032	0.685875	0.587219	0.998478	1.03066	0.315456	1.08192	0.887611	3.06898	1.11391	1.68649	0.874832	2.60239	0.912182	3.67198	-2.22919	2.1283	1.72067	2.93602	1.09812	1.60319	1.37511	-0.463017	0.795284	0.889793		6.79651	2.8159	1.98114	5.67873	2.10159	-0.043972	3.16604	5.17475	4.3915	2.63678	2.23803	1.5905	0.975449	2.50451	2.07854	1.81789	4.47324
	6.80675	1.03032	4.06335	0.177139	1.24844	0.865868	1.60706	0.792198	0.798729	1.05855	1.06543	0.329079	1.11872	0.799042	3.14509	1.2885	1.79076	0.884441	2.6046	0.958031	3.76281	-2.16955	2.15297	1.75607	2.83143	1.07849	1.57663	1.42665	-0.434395	0.744717	1.03564		6.80675	2.60086	1.88037	5.58701	1.76584	0.0136681	3.01387	5.1334	4.35958	2.49441	2.18385	1.52101	0.862461	2.28008	1.84883	1.61958	4.34621
	6.81699	1.13445	4.0383	0.0371399	1.41236	0.82505	1.64099	0.858727	1.01438	1.10218	1.01222	0.378494	1.0165	0.808136	3.28988	1.44627	1.73386	0.901249	2.68087	0.976482	3.74295	-2.25881	1.97207	1.83654	2.75746	1.09196	1.62687	1.40028	-0.37075	0.705391	1.26925		6.81699	2.4022	1.74938	5.46634	1.55309	0.020153	2.62897	4.98102	4.32731	2.40731	2.10736	1.38984	0.854305	1.94123	1.7348	1.37532	4.17376
	6.82723	1.23446	4.02347	-0.0667877	1.55104	0.673538	1.60314	0.943378	1.19192	0.932449	1.0005	0.346973	0.95343	0.773899	3.47466	1.61782	1.53185	0.877384	2.7247	0.819054	3.77702	-2.3374	1.89064	1.89355	2.74234	1.13087	1.70942	1.48813	-0.36256	0.669426	1.39369		6.82723	2.23339	1.70339	5.38015	1.35192	0.100273	2.30906	4.87555	4.26088	2.25195	2.03323	1.20835	0.807949	1.66692	1.70483	1.23761	3.92147
	6.83747	1.45387	3.9467	-0.099617	1.68589	0.516083	1.6293	1.09525	1.27824	0.837688	0.929802	0.468056	0.913567	0.658504	3.59505	1.74857	1.39437	0.8279	2.60469	0.816277	3.77775	-2.39517	1.84964	2.01472	2.69884	1.02481	1.64725	1.59828	-0.430748	0.563957	1.62304		6.83747	2.04409	1.54335	5.34503	1.06258	0.157864	1.97797	4.74206	4.15691	2.01818	1.85675	1.03618	0.78817	1.39275	1.67509	1.00203	3.71533
	6.84771	1.63328	3.86345	-0.0208206	1.84492	0.37896	1.81761	1.2784	1.31294	0.752106	0.908642	0.504936	0.974564	0.554901	3.7517	1.88973	1.31628	0.884178	2.5836	0.674419	3.84792	-2.29593	1.82151	2.01006	2.64786	0.915855	1.56162	1.74886	-0.362251	0.441246	1.91724		6.84771	1.87007	1.44104	5.20478	0.942356	0.169178	1.82544	4.63199	4.10579	1.82607	1.7137	0.908535	0.766415	1.12931	1.58849	0.739307	3.48693
	6.85795	1.88528	3.83154	0.0233459	1.98753	0.387875	1.90473	1.43198	1.1966	0.784058	0.833763	0.662998	1.05294	0.426353	3.84173	2.09892	1.3434	0.921528	2.66905	0.692348	3.96927	-2.37149	1.70774	2.01708	2.6927	0.865334	1.40775	1.97398	-0.240181	0.344269	2.14275		6.85795	1.73711	1.35012	5.05771	0.803951	0.127728	1.65139	4.4514	3.97584	1.80853	1.64575	0.785904	0.765114	0.862865	1.54991	0.527615	3.37077
	6.86819	2.03419	3.74163	-0.0235138	2.10603	0.184254	1.89715	1.56657	1.0565	0.819923	0.807907	0.949066	1.16663	0.190716	4.05856	2.29758	1.29576	0.863197	2.65897	0.798717	4.06119	-2.37599	1.69221	2.07178	2.89825	0.932182	1.37038	2.20032	-0.233181	0.325802	2.2443		6.86819	1.67721	1.10827	4.99653	0.705044	0.135284	1.34693	4.26499	3.89009	1.7961	1.59391	0.694019	0.871689	0.687786	1.46709	0.394207	3.18781
	6.87843	2.29021	3.61556	-0.100872	2.25307	0.0352058	1.88834	1.63913	1.07661	0.850693	0.814667	1.21298	1.1576	0.112381	4.1642	2.41373	1.38343	0.821476	2.60925	0.824776	4.00949	-2.4938	1.47696	2.02247	2.98341	1.019	1.30431	2.3161	-0.162445	0.259163	2.59396		6.87843	1.62353	0.962452	4.94966	0.567837	0.117653	1.10821	4.0515	3.67023	1.82739	1.46795	0.643856	0.834614	0.46484	1.30668	0.219875	3.00369
	6.88867	2.40466	3.56737	-0.0439491	2.41628	-0.113724	1.94294	1.64204	1.19371	0.709297	0.680092	1.44583	1.13639	0.122803	4.27454	2.58761	1.44111	0.780159	2.58806	0.829185	3.91778	-2.49532	1.32419	2.04064	2.92198	1.07466	1.31234	2.44592	-0.143047	0.164047	2.95377		6.88867	1.50208	0.922756	4.81857	0.581329	0.165112	1.02082	3.86919	3.52425	1.75661	1.33038	0.714249	0.841492	0.266808	1.19408	0.137814	2.79611
	6.89891	2.47546	3.47601	-0.0290222	2.65692	-0.151165	2.00398	1.66204	1.33602	0.588718	0.555077	1.54418	1.14639	0.0749054	4.42382	2.80186	1.37461	0.802666	2.53666	0.811058	3.92453	-2.48947	1.17464	2.12689	2.9248	0.903	1.34932	2.70249	-0.0914993	0.159515	3.22005		6.89891	1.43233	0.889927	4.66834	0.571983	0.2127	0.919849	3.78882	3.50158	1.68615	1.20793	0.704712	0.912388	0.01791	0.972443	-0.0196495	2.52633
	6.90915	2.58945	3.40422	-0.04879	2.90685	-0.266357	2.03719	1.76796	1.37166	0.545589	0.394466	1.78233	1.02294	0.105778	4.54829	2.93402	1.34381	0.897995	2.50068	0.777763	3.9504	-2.52478	1.07632	2.28812	3.02354	0.890736	1.25493	2.8502	-0.105629	0.19981	3.41283		6.90915	1.37183	0.648361	4.52633	0.320034	0.31913	0.829037	3.48715	3.32796	1.54269	1.07368	0.59716	0.951916	-0.160854	0.833099	-0.197178	2.37729
	6.91939	2.7771	3.26187	-0.0587921	2.99701	-0.413452	2.06895	1.78737	1.38506	0.338402	0.355354	1.95539	0.964001	0.0619812	4.57542	3.0928	1.30567	0.876633	2.38265	0.808777	3.99438	-2.61427	1.00413	2.30917	3.00457	0.888306	1.24493	2.95795	0.0173378	0.185184	3.56087		6.91939	1.23796	0.568012	4.40552	0.228901	0.278812	0.618847	3.22892	3.07351	1.42341	0.944118	0.498253	1.01903	-0.319927	0.716728	-0.410442	2.13749
	6.92963	2.99985	3.11084	-0.0375214	3.05917	-0.610611	2.09909	1.91635	1.35496	0.250175	0.374466	2.13972	1.05367	-0.04179	4.75823	3.32686	1.23785	0.794357	2.33616	0.815727	4.00282	-2.68295	0.907604	2.32114	2.8613	0.959351	1.16373	3.06274	-0.00283432	0.149254	3.65838		6.92963	1.1862	0.472397	4.23446	0.191433	0.309151	0.361996	3.0862	2.9402	1.39381	0.797993	0.444168	1.05342	-0.521202	0.597576	-0.478428	1.84073
	6.93987	3.20589	3.12766	0.0401993	3.15882	-0.78828	2.08884	2.0844	1.33874	0.330379	0.428253	2.27927	1.00798	-0.145264	4.9593	3.65681	1.19189	0.783783	2.38704	0.783211	3.9342	-2.71984	0.866669	2.43756	2.78286	0.882011	1.16797	3.12315	-0.00575256	0.135448	3.83003		6.93987	1.1689	0.441532	4.08965	0.125866	0.406986	0.184422	2.84578	2.75822	1.24078	0.72263	0.373894	0.992149	-0.764484	0.63538	-0.641842	1.58212
	6.95011	3.36783	3.0245	0.0479851	3.16523	-0.895199	2.08173	2.05744	1.49396	0.300434	0.351635	2.37304	0.945526	-0.021347	5.06703	3.84721	1.21133	0.858047	2.35191	0.836052	3.98294	-2.77607	0.764709	2.49527	2.65795	0.78389	1.07755	3.10713	-0.0452576	0.0417023	4.05419		6.95011	1.05582	0.392372	4.02905	-0.0257187	0.495358	0.0344353	2.5853	2.58363	1.17593	0.62228	0.271801	0.972851	-0.985771	0.501854	-0.693302	1.39305
	6.96035	3.46649	2.86302	0.022583	3.26094	-0.903831	2.05106	1.94534	1.46289	0.182442	0.306549	2.47517	0.921684	0.0158691	5.09808	3.84257	1.09259	0.944008	2.41697	0.961823	4.01068	-2.74665	0.65152	2.48813	2.64017	0.723213	0.973812	3.16695	-0.0459862	0.171318	4.30701		6.96035	0.939507	0.234276	3.96468	-0.0892601	0.51395	-0.0817833	2.33156	2.31031	1.12998	0.400715	0.142532	0.992149	-1.17765	0.363224	-0.741417	1.17538
	6.97059	3.54902	2.7473	-0.00131989	3.32768	-0.927624	2.15452	1.93008	1.4404	0.104633	0.214603	2.66419	1.05824	-0.0203552	5.16146	3.93008	1.05022	0.924652	2.2872	1.04244	3.96791	-2.66144	0.49044	2.5356	2.63525	0.789742	0.895527	3.24761	-0.0107117	0.219276	4.53852		6.97059	0.83955	0.107487	3.77337	-0.188427	0.461357	-0.285583	2.19478	2.09803	0.977711	0.332504	0.185162	1.01057	-1.37714	0.259037	-0.885471	1.07488
	6.98083	3.74884	2.61736	0.077919	3.36211	-0.984962	2.15134	1.91226	1.42533	0.173347	0.124924	2.85101	0.9939	0.077774	5.21687	3.9705	1.07441	0.997715	2.15066	0.931957	3.91361	-2.70145	0.540558	2.62871	2.54927	0.907295	0.904968	3.40495	-0.0191193	0.0834045	4.61486		6.98083	0.774078	-0.0199852	3.55899	-0.282616	0.47131	-0.443321	1.96413	1.87094	0.851673	0.23027	0.223297	1.03069	-1.53044	0.0924034	-1.09098	0.902122
	6.99107	3.9182	2.49176	0.146286	3.29335	-1.18552	2.13615	1.94606	1.35572	0.306873	0.0966835	3.09497	0.956001	0.105515	5.22967	4.07058	1.05622	1.07837	2.1447	0.862648	3.88937	-2.77677	0.420227	2.6064	2.41048	1.04298	0.881378	3.44111	-0.0126686	-0.00662231	4.67782		6.99107	0.585072	-0.0370331	3.38085	-0.32267	0.446671	-0.604328	1.69948	1.58744	0.735088	0.14661	0.0846062	1.13398	-1.6726	0.0817451	-1.26196	0.697048
	7.00131	4.01918	2.28225	0.146439	3.25786	-1.36908	2.22155	1.92719	1.33285	0.291817	-0.0153885	3.26243	0.950638	0.20079	5.28565	4.14413	1.02407	1.08322	2.09945	0.875725	3.928	-2.82753	0.384727	2.59505	2.26398	1.07166	0.830711	3.51103	0.0235596	-0.121445	4.77418		7.00131	0.478367	-0.137062	3.33413	-0.38895	0.475533	-0.560684	1.40856	1.37764	0.677578	0.0350075	-0.0161591	1.07434	-1.69522	0.0145378	-1.41192	0.722042
	7.01155	4.22888	2.16713	0.131554	3.39759	-1.56202	2.23928	1.94837	1.36826	0.32671	-0.0282021	3.24812	0.910465	0.250057	5.41374	4.1513	1.01011	1.11505	2.07286	0.90572	3.96581	-2.90227	0.220016	2.5119	2.12446	0.996212	0.714306	3.493	0.164932	-0.251625	4.85632		7.01155	0.35593	-0.232037	3.20041	-0.470383	0.358501	-0.49432	1.13803	1.23552	0.598473	-0.0310936	-0.126236	1.06675	-1.70308	-0.0981026	-1.54506	0.659054
	7.02179	4.25848	2.11522	0.210312	3.51571	-1.55142	2.16334	1.96246	1.32015	0.314453	-0.0286789	3.25048	0.770298	0.348907	5.41612	4.21346	0.889915	1.2312	2.11667	1.00019	3.80175	-2.84094	0.192909	2.46152	2.15004	0.965504	0.717846	3.54344	0.172153	-0.389359	4.93966		7.02179	0.347607	-0.439304	3.07028	-0.566525	0.369579	-0.556652	0.869411	1.203	0.559742	-0.142094	-0.164097	1.02562	-2.16931	-0.133736	-1.68335	0.589626
	7.03203	4.32903	2.01481	0.107174	3.56007	-1.54263	2.19009	2.02076	1.35806	0.38089	0.121765	3.2638	0.607819	0.432674	5.31108	4.04337	0.7561	1.38364	2.09969	1.10318	3.87214	-2.63657	0.0184937	2.54354	2.06491	0.956242	0.733643	3.4487	0.230339	-0.429127	4.96663		7.03203	0.229855	-0.507504	3.00036	-0.616795	0.313263	-0.637394	0.668186	1.17815	0.43314	-0.18745	-0.275391	1.04591	-2.38108	-0.15778	-1.64303	0.501652
	7.04227	4.38812	1.9012	0.235573	3.56865	-1.46423	2.11217	1.97363	1.44362	0.346451	0.123444	3.30732	0.554256	0.426952	5.19464	4.03613	0.70657	1.47844	1.96238	1.17045	3.91828	-2.61691	-0.0679092	2.54718	2.00149	0.891094	0.680141	3.48272	0.237602	-0.401543	5.0278		7.04227	0.259346	-0.504177	2.8326	-0.698631	0.33881	-0.539989	0.464245	0.921741	0.337048	-0.307446	-0.430031	0.972218	-2.4291	-0.0977707	-1.68508	0.214893
	7.05251	4.50121	1.71087	0.27433	3.60115	-1.51139	2.13862	2.00729	1.41584	0.341049	0.158455	3.30209	0.527817	0.554066	5.15013	4.05753	0.75362	1.59036	1.85272	1.18158	3.89085	-2.65449	-0.104195	2.48212	1.90354	0.979759	0.549736	3.63012	0.232117	-0.438377	5.05652		7.05251	0.14687	-0.426311	2.60101	-0.758286	0.294907	-0.509377	0.298172	0.779396	0.195675	-0.250309	-0.551384	0.890202	-2.40893	-0.114162	-1.67618	0.072258
	7.06275	4.61169	1.67213	0.249676	3.56578	-1.63792	2.18971	1.9367	1.35304	0.423676	0.127056	3.40641	0.493195	0.653008	5.17774	4.06722	0.784019	1.52363	1.82237	1.27357	3.88568	-2.63263	-0.172123	2.37339	1.699	1.11572	0.490906	3.66556	0.348618	-0.44442	5.00071		7.06275	0.22562	-0.383492	2.4717	-0.886158	0.212666	-0.440819	0.0977821	0.548595	0.153728	-0.36834	-0.553078	0.810844	-2.43059	-0.239567	-1.68818	-0.144119
	7.07299	4.70531	1.46109	0.315727	3.59096	-1.60671	2.1749	1.89367	1.35705	0.563519	0.0891724	3.37714	0.432697	0.662308	5.18032	4.00713	0.83659	1.59486	1.80959	1.31964	3.84859	-2.58157	-0.308319	2.24657	1.62274	1.23672	0.470688	3.68824	0.51984	-0.492306	4.94006		7.07299	0.147228	-0.348515	2.40794	-0.856869	0.278431	-0.386757	-0.113384	0.520081	-0.0510292	-0.337391	-0.615055	0.761158	-2.48122	-0.424	-1.63182	-0.244743
	7.08323	4.84264	1.33312	0.433029	3.43121	-1.58798	2.0765	1.88288	1.43012	0.487679	0.052681	3.44022	0.438065	0.661449	5.13808	3.92042	0.869614	1.77226	1.76914	1.4276	3.73413	-2.44252	-0.29512	2.26662	1.62704	1.26592	0.407677	3.59769	0.679485	-0.504574	4.93702		7.08323	0.0943489	-0.324017	2.23901	-0.813061	0.274212	-0.317616	-0.337284	0.3419	-0.0663109	-0.354023	-0.792377	0.715416	-2.41233	-0.536068	-1.58865	-0.330158
	7.09347	4.99203	1.37816	0.627701	3.35699	-1.66887	1.98218	1.91904	1.46585	0.612015	0.193268	3.52632	0.396923	0.593868	5.10446	3.79008	0.910919	1.88507	1.62041	1.42043	3.65249	-2.40287	-0.404701	2.19936	1.57536	1.24136	0.312641	3.58496	0.71347	-0.630661	4.86666		7.09347	0.0343513	-0.337681	2.02388	-0.765663	0.266331	-0.249619	-0.595921	0.267117	-0.0291061	-0.388676	-0.947887	0.661118	-2.30598	-0.514763	-1.47717	-0.493053
	7.10371	5.12838	1.38945	0.772232	3.36296	-1.76414	1.85065	1.92215	1.49984	0.604897	0.184052	3.66719	0.47715	0.700966	5.10619	3.71993	0.913757	1.88864	1.60023	1.318	3.58524	-2.42253	-0.485619	2.13074	1.44595	1.36079	0.313263	3.60181	0.706261	-0.762817	4.70721		7.10371	-0.0090065	-0.364498	1.86956	-0.786251	0.226349	-0.228771	-0.751408	0.163692	-0.167088	-0.451214	-0.953026	0.63055	-2.34937	-0.492413	-1.37606	-0.601215
	7.11395	5.15497	1.44343	0.779716	3.30923	-1.69216	1.71336	1.86443	1.54486	0.676613	0.281933	3.69538	0.472763	0.852623	5.08391	3.64548	0.972595	1.88928	1.5755	1.32269	3.61442	-2.42853	-0.429127	2.00414	1.46387	1.42463	0.293297	3.61455	0.776115	-0.78437	4.69222		7.11395	0.00133896	-0.47924	1.63871	-0.839371	0.225742	-0.242096	-0.901432	0.174061	-0.313492	-0.46553	-0.942749	0.559086	-2.4656	-0.611599	-1.42055	-0.875835
	7.12419	5.14385	1.31176	0.775589	3.22793	-1.66405	1.58326	1.88121	1.63259	0.760139	0.230759	3.6801	0.472466	0.981632	4.94382	3.46035	1.15118	1.82722	1.48632	1.4955	3.55351	-2.41045	-0.600346	1.77946	1.52954	1.44667	0.274197	3.7492	0.842968	-0.830597	4.6552		7.12419	0.0259094	-0.502674	1.4275	-0.875111	0.132137	-0.122803	-1.09469	0.123112	-0.278088	-0.408905	-0.879566	0.538902	-2.42977	-0.705021	-1.39233	-1.10234
	7.13443	5.29534	1.25754	0.804344	3.14972	-1.51552	1.46319	1.87048	1.75796	0.751068	0.265591	3.66872	0.548355	1.07297	4.84927	3.27256	1.29997	1.77299	1.42278	1.68185	3.48089	-2.37976	-0.6548	1.66698	1.52403	1.42406	0.219017	3.80111	0.884499	-0.886223	4.61548		7.13443	0.0778847	-0.550766	1.29346	-0.930733	0.02071	0.0798988	-1.2215	-0.0179329	-0.303608	-0.38752	-0.900547	0.500484	-2.50047	-0.759953	-1.36076	-1.14002
	7.14467	5.42485	1.07623	0.885693	3.0687	-1.50497	1.38805	2.03569	1.78593	0.886539	0.3619	3.57095	0.566429	1.10293	4.75638	3.16866	1.54927	1.77996	1.44521	1.76545	3.39713	-2.41908	-0.526291	1.49556	1.55001	1.39789	0.229851	3.71125	0.976433	-0.854107	4.5435		7.14467	0.0453148	-0.50687	1.28686	-0.960033	-0.0511703	0.264221	-1.4077	-0.0770607	-0.323219	-0.485699	-0.926678	0.459949	-2.51844	-0.808422	-1.33561	-1.26079
	7.15491	5.61167	0.870781	0.896946	2.97081	-1.40543	1.3274	2.02444	1.69385	0.868694	0.413635	3.5487	0.615387	1.20119	4.6503	3.07907	1.74476	1.87553	1.46122	1.80297	3.4239	-2.29815	-0.551208	1.44121	1.57912	1.43067	0.23674	3.6834	1.01014	-0.888725	4.47467		7.15491	0.0759773	-0.545307	1.24485	-0.970524	-0.0900803	0.428875	-1.58601	-0.183613	-0.440903	-0.509315	-1.02851	0.469952	-2.46135	-0.978046	-1.19601	-1.43514
	7.16515	5.69177	0.71439	0.882748	2.92989	-1.35294	1.31869	2.01464	1.70348	0.940922	0.518635	3.59316	0.69857	1.19868	4.56548	3.08545	1.83549	1.81446	1.39912	1.77459	3.41245	-2.181	-0.693104	1.43761	1.62482	1.5677	0.255066	3.59249	1.12906	-1.02876	4.37355		7.16515	0.0935364	-0.51635	0.963814	-0.91544	-0.100368	0.560741	-1.71251	-0.166805	-0.552158	-0.422031	-0.952511	0.419025	-2.51175	-1.10843	-1.11868	-1.52155
	7.17539	5.80228	0.696342	0.962273	2.83286	-1.29005	1.28776	1.98113	1.83381	1.02198	0.521568	3.59986	0.773911	1.10081	4.58287	3.04173	2.09531	1.74547	1.43744	1.76617	3.43951	-2.17947	-0.786037	1.36853	1.60918	1.74754	0.248318	3.6508	1.19579	-1.13948	4.31481		7.17539	0.113789	-0.456806	0.920994	-0.928692	-0.120205	0.683743	-1.82653	-0.191921	-0.637489	-0.305717	-0.968845	0.434284	-2.46587	-1.19172	-1.06843	-1.63428
	7.18563	5.90762	0.721256	1.09583	2.69736	-1.33926	1.18492	1.9068	1.93749	1.05098	0.667374	3.44438	0.710182	1.19357	4.62386	3.02611	2.37464	1.89986	1.34205	1.74287	3.26691	-2.22233	-0.833305	1.39225	1.63869	1.83836	0.265888	3.66164	1.27267	-1.26723	4.31322		7.18563	0.0140495	-0.52795	0.918011	-0.947613	-0.134655	0.860317	-1.9219	-0.133282	-0.73119	-0.195889	-1.07506	0.421982	-2.42841	-1.14606	-1.00232	-1.71828
	7.19587	5.97955	0.801414	1.17945	2.64178	-1.29478	1.00797	1.96798	2.11121	1.04205	0.816277	3.3899	0.667992	1.39051	4.64977	2.97136	2.58612	2.08738	1.20042	1.69175	3.10058	-2.17577	-0.771973	1.23501	1.63528	1.8658	0.236599	3.62901	1.30786	-1.34969	4.30901		7.19587	-0.0854683	-0.596493	0.877338	-0.795704	-0.11758	1.03138	-1.93086	-0.0177917	-0.836975	-0.113922	-1.32277	0.500683	-2.36935	-1.07777	-1.00229	-1.87488
	7.20611	6.00025	0.668793	1.24397	2.49966	-1.1722	0.824909	2.07879	2.16768	0.966171	0.973907	3.28851	0.631824	1.45824	4.58649	2.84327	2.79719	2.1907	1.11914	1.75029	2.96607	-2.14078	-0.63097	1.07573	1.59406	1.9598	0.129917	3.60497	1.40015	-1.37117	4.22908		7.20611	-0.142616	-0.579456	0.958172	-0.770458	-0.0615196	1.30617	-2.05338	-0.400669	-0.950809	-0.0025444	-1.43373	0.565033	-2.34375	-1.01275	-0.974316	-1.99822
	7.21635	6.08036	0.45282	1.20449	2.50197	-0.98996	0.670662	2.13819	2.17648	0.9226	1.06646	3.29918	0.785774	1.53313	4.3842	2.76058	2.92468	2.30927	1.15702	1.82635	2.81263	-2.10671	-0.655983	0.988773	1.6845	1.9996	0.137119	3.53824	1.46797	-1.47295	4.18067		7.21635	-0.136478	-0.466103	0.920551	-0.646694	-0.116543	1.51451	-2.268	-0.812965	-1.01403	-0.00135422	-1.58884	0.648983	-2.25895	-1.055	-0.976318	-2.04956
	7.22659	6.23354	0.264877	1.23586	2.30553	-0.832878	0.580982	2.03185	2.34882	0.984329	1.07513	3.19983	0.757187	1.6588	4.29053	2.69777	3.10308	2.41898	1.23312	1.82484	2.81579	-2.1389	-0.735611	0.945107	1.84658	2.08623	0.141182	3.52625	1.45045	-1.54202	4.07748		7.22659	-0.231213	-0.301022	0.953403	-0.619976	-0.187382	1.70749	-2.49596	-0.68787	-1.09505	-0.0755844	-1.66798	0.716167	-2.32934	-1.12836	-0.993237	-2.15356
	7.23683	6.34871	0.184601	1.1069	2.09656	-0.713989	0.437908	2.0255	2.44481	0.866837	1.09694	3.09317	0.788635	1.92073	4.27839	2.13326	3.37009	2.54486	1.22784	1.86907	2.76454	-2.09759	-0.71151	0.894623	2.03579	2.19257	0.210609	3.41939	1.59216	-1.53419	3.87925		7.23683	-0.204594	-0.0987701	1.0668	-0.666531	-0.131767	1.87774	-2.70184	-0.45343	-1.21592	-0.209946	-1.61692	0.856014	-2.34409	-1.26776	-1.12342	-2.30165
	7.24707	6.30927	0.101021	1.12737	2.01229	-0.612469	0.327446	2.03773	2.44733	0.952427	1.16033	2.95637	0.733627	1.98978	4.26501	1.90362	3.57478	2.66095	1.23199	1.8898	2.7388	-2.03812	-0.844761	0.937752	2.11689	2.24675	0.28812	3.34311	1.57367	-1.52435	3.79205		7.24707	-0.129467	-0.0225258	1.09754	-0.613865	-0.0814476	1.92053	-2.79	-0.173027	-1.20063	-0.0821304	-1.6755	0.988689	-2.44351	-1.39275	-1.07281	-2.44694
	7.25731	6.31851	0.0998154	1.10965	1.93615	-0.593979	0.278534	2.03835	2.59395	0.892487	1.30786	2.83408	0.726166	1.99154	4.15045	2.06305	3.8	2.74897	1.27874	1.90612	2.68411	-2.0665	-0.796909	0.940781	2.22488	2.2588	0.373486	3.30497	1.58241	-1.54365	3.69192		7.25731	-0.113434	0.0514565	1.00323	-0.515171	-0.041111	1.97597	-2.80926	-0.0153961	-1.19646	-0.035183	-1.80699	1.04645	-2.51935	-1.56085	-0.929779	-2.58157
	7.26755	6.35733	0.0775757	1.0499	1.79675	-0.550945	0.143341	2.09541	2.75009	0.994591	1.45959	2.69548	0.778847	2.11205	4.12342	2.08394	3.94761	2.88755	1.24735	2.00264	2.51787	-1.93715	-0.755554	0.861183	2.28065	2.33819	0.463215	3.16179	1.63842	-1.44028	3.59251		7.26755	-0.20924	0.259693	1.02525	-0.43935	0.184101	2.04039	-2.75783	0.145023	-1.31063	0.0256119	-1.8666	1.13674	-2.58976	-1.7622	-0.811523	-2.66726
	7.27779	6.3813	-0.115868	0.996834	1.73256	-0.334354	0.106956	2.06254	2.89743	1.09	1.53517	2.66428	0.778606	2.22458	4.17325	2.237	3.97501	2.95773	1.25801	2.08527	2.4012	-1.79162	-0.679203	0.856808	2.33533	2.35911	0.474899	3.11947	1.523	-1.44238	3.48466		7.27779	-0.414738	0.372009	1.07904	-0.352757	0.179119	2.17457	-2.83646	0.295368	-1.50375	-0.0297127	-1.91341	1.25891	-2.66002	-1.86329	-0.627548	-2.67978
	7.28803	6.37535	-0.105103	0.857334	1.64495	-0.185806	-0.00384521	1.99336	3.11234	1.10494	1.5818	2.6876	0.810768	2.25536	4.25287	2.17388	4.06496	3.05378	1.29072	2.11844	2.24505	-1.66506	-0.622948	0.779953	2.45812	2.45853	0.510544	3.04517	1.52742	-1.32173	3.37886		7.28803	-0.464909	0.47261	0.999695	-0.296482	0.298946	2.31925	-2.88786	0.445705	-1.45718	0.036068	-1.93975	1.3578	-2.69397	-1.89138	-0.583462	-2.77112
	7.29827	6.33828	-0.224884	0.604145	1.53736	0.0082283	-0.137325	1.96997	3.30634	1.07784	1.62366	2.6607	0.904518	2.30195	4.29614	2.25574	4.17849	3.10297	1.31202	2.17583	2.31223	-1.50066	-0.496048	0.731422	2.60376	2.44833	0.594559	2.99699	1.67795	-1.20445	3.29867		7.29827	-0.525478	0.507465	1.05677	-0.199932	0.406628	2.48564	-2.93816	0.588139	-1.5246	0.0461884	-1.98833	1.52363	-2.69428	-1.89411	-0.479156	-2.91433
	7.30851	6.39815	-0.194305	0.542263	1.39481	0.162735	-0.17514	1.97138	3.42093	1.0182	1.76083	2.57155	1.09686	2.4091	4.25582	2.22987	4.29444	3.16348	1.43549	2.19143	2.32507	-1.41868	-0.384983	0.743927	2.63786	2.52023	0.503342	2.94996	1.75813	-1.08117	3.35295		7.30851	-0.655014	0.505013	1.20895	-0.019043	0.414307	2.55642	-3.09291	0.565548	-1.5757	0.0958595	-2.14372	1.66125	-2.584	-1.87401	-0.532063	-2.97653
	7.31875	6.35102	-0.346489	0.535004	1.35872	0.338951	-0.373383	1.93016	3.32791	0.937408	1.86266	2.31015	1.17307	2.59611	4.26691	2.18851	4.39555	3.2737	1.42298	2.26137	2.36636	-1.42342	-0.354847	0.648346	2.65384	2.48213	0.410599	2.97355	1.81238	-1.09309	3.42725		7.31875	-0.810497	0.609509	1.32324	0.117641	0.496262	2.75229	-3.11911	0.60815	-1.49246	0.0881958	-2.34	1.73791	-2.46902	-1.84538	-0.628716	-3.02666
	7.32899	6.41373	-0.370785	0.574032	1.33287	0.469784	-0.519608	1.8219	3.33624	0.8843	1.85661	2.23252	1.15102	2.73226	4.29143	2.19614	4.40112	3.50422	1.50538	2.30695	2.37676	-1.31767	-0.400169	0.606873	2.76968	2.42139	0.413376	3.07768	1.78773	-1.05891	3.49479		7.32899	-0.78656	0.698284	1.32964	0.141506	0.614719	2.8879	-3.00941	0.73698	-1.41979	0.11813	-2.39692	1.73806	-2.32332	-1.93084	-0.529903	-3.09052
	7.33923	6.36623	-0.407501	0.650623	1.14004	0.58749	-0.67907	1.73475	3.34391	0.867298	1.77695	2.18447	1.05663	2.74948	4.27821	2.13512	4.35886	3.69887	1.46325	2.37091	2.34696	-1.21497	-0.41301	0.679115	2.93508	2.40834	0.53989	3.01745	1.87231	-1.18782	3.55747		7.33923	-0.7999	0.801212	1.31427	0.254055	0.722355	2.97255	-2.96228	0.767704	-1.32924	0.169415	-2.50153	1.74796	-2.19561	-1.92848	-0.479511	-3.11616
	7.34947	6.4838	-0.355991	0.716976	1.03847	0.709785	-0.792965	1.78844	3.29121	0.79681	1.64351	2.09997	1.16122	2.81657	4.23186	2.12248	4.4595	3.81721	1.50261	2.46634	2.31353	-1.07313	-0.431225	0.759117	2.86769	2.42215	0.643436	2.95129	1.85483	-1.12594	3.5681		7.34947	-0.917324	0.876122	1.36234	0.252529	0.837605	3.04051	-2.93206	0.893764	-1.33123	0.188095	-2.52937	1.74593	-2.18304	-2.02494	-0.513988	-3.241
	7.35971	6.43448	-0.327904	0.689522	0.95153	0.762539	-0.784248	1.75188	3.2954	0.729839	1.55734	1.85828	1.31979	3.02552	4.24638	2.11398	4.4892	3.94303	1.57807	2.5428	2.22964	-0.933167	-0.471291	0.907116	2.92421	2.47993	0.706081	2.84275	1.83393	-1.0886	3.48152		7.35971	-1.01464	0.945728	1.32037	0.299423	0.787251	3.19477	-2.8984	0.967785	-1.47379	0.119976	-2.59506	1.8213	-2.26588	-2.06454	-0.420292	-3.37531
	7.36995	6.46633	-0.217731	0.582699	0.916115	0.874989	-0.761124	1.68994	3.35106	0.73008	1.62836	1.74681	1.44534	3.20554	4.3396	2.1066	4.57495	4.10998	1.60582	2.52781	2.21474	-0.789341	-0.506454	0.998013	2.93479	2.4059	0.724712	2.82917	1.84757	-1.04694	3.47272		7.36995	-1.05692	0.953548	1.27687	0.337498	0.852043	3.3723	-2.78667	1.01367	-1.65683	0.0369225	-2.62566	1.84219	-2.17518	-2.28937	-0.29232	-3.56621
	7.38019	6.40232	-0.241955	0.504555	0.82077	0.941589	-0.852127	1.5948	3.36974	0.693813	1.62078	1.66377	1.40899	3.33512	4.30202	2.12542	4.62944	4.20908	1.6445	2.52536	2.26926	-0.675102	-0.552505	1.02234	3.05733	2.33312	0.737633	2.79517	1.77605	-1.00393	3.55677		7.38019	-1.18125	1.04838	1.26675	0.39962	0.9062	3.46778	-2.78127	1.05804	-1.61274	0.0447083	-2.67122	1.88478	-2.10533	-2.40579	-0.33186	-3.64537
	7.39043	6.39142	-0.370544	0.466316	0.757687	1.083	-0.869507	1.58273	3.29208	0.756435	1.61433	1.524	1.38044	3.39576	4.22368	2.15797	4.64369	4.41405	1.65354	2.45648	2.34279	-0.545616	-0.55035	1.05652	3.14321	2.26927	0.830261	2.7817	1.67139	-0.908989	3.60435		7.39043	-1.13854	1.07351	1.33229	0.503891	1.06259	3.51601	-2.76695	1.07615	-1.65797	-0.00187683	-2.70228	1.9229	-1.96484	-2.36386	-0.396221	-3.65342
	7.40067	6.3223	-0.432667	0.352623	0.761585	1.12376	-0.872417	1.49222	3.35684	0.791306	1.62893	1.42613	1.43174	3.44794	4.10448	2.12217	4.64555	4.53524	1.79534	2.33966	2.39263	-0.447472	-0.446388	1.06028	3.22966	2.19459	0.879066	2.64941	1.57284	-0.830288	3.56546		7.40067	-1.11651	1.00623	1.39505	0.619061	1.09325	3.61483	-2.7181	1.28751	-1.71525	-0.192219	-2.6725	1.87791	-2.05348	-2.29081	-0.393757	-3.72371
	7.41091	6.26083	-0.456947	0.268929	0.799339	1.16732	-0.861702	1.4337	3.44267	0.758377	1.58247	1.45795	1.51445	3.47677	4.09838	2.04243	4.6633	4.62072	2.04773	2.39612	2.54381	-0.40731	-0.302383	1.22768	3.23658	2.144	0.934521	2.65363	1.51659	-0.709183	3.56326		7.41091	-1.14185	0.976818	1.40757	0.732143	1.04987	3.69994	-2.59073	1.25466	-1.85112	-0.230579	-2.65698	1.93408	-2.07032	-2.2398	-0.479275	-3.77112
	7.42115	6.21873	-0.479801	0.258091	0.831261	1.33932	-0.852413	1.43928	3.33355	0.698128	1.50773	1.4852	1.49372	3.47679	4.12955	1.89075	4.63015	4.69386	2.16143	2.44191	2.66956	-0.308701	-0.179634	1.23442	3.15643	2.13637	1.05808	2.51189	1.52445	-0.564537	3.59102		7.42115	-1.19199	0.976925	1.41466	0.808735	1.05492	3.77521	-2.59234	1.22886	-1.82319	-0.173992	-2.67102	1.98452	-2.00961	-2.29208	-0.507778	-3.89233
	7.43139	6.11989	-0.441463	0.246792	0.864044	1.45451	-0.921196	1.35474	3.1911	0.630051	1.1016	1.45322	1.56995	3.47985	4.09581	1.95306	4.68192	4.73494	2.04052	2.49718	2.676	-0.0503998	-0.0178528	1.26878	3.20262	2.17493	1.09595	2.38235	1.586	-0.500069	3.59949		7.43139	-1.32578	0.940746	1.28978	0.686771	1.07842	3.87123	-2.63035	1.25511	-1.75233	-0.112614	-2.7416	2.02956	-1.88431	-2.4095	-0.51778	-3.93887
	7.44163	6.02739	-0.435387	0.301903	0.909023	1.57056	-0.87944	1.27834	3.15678	0.669601	0.96349	1.36462	1.57692	3.5327	4.12295	1.96878	4.70436	4.85157	1.97076	2.53354	2.58837	0.173477	-0.0196533	1.24422	3.22954	2.12137	1.2142	2.34185	1.60986	-0.48315	3.61289		7.44163	-1.48059	0.941006	1.33135	0.693386	1.19735	3.88818	-2.57369	1.38569	-1.66568	-0.159103	-2.70856	1.96597	-1.71869	-2.50049	-0.453861	-3.92423
	7.45187	5.89827	-0.496849	0.287178	1.0325	1.63311	-0.846645	1.11417	3.00711	0.693623	1.04691	1.31081	1.63569	3.5625	4.21486	1.95759	4.60691	4.87405	1.99329	2.6078	2.51176	0.346321	-0.0504456	1.32647	3.25922	2.06626	1.18207	2.24066	1.59311	-0.4515	3.6738		7.45187	-1.59866	1.00822	1.39546	0.694569	1.31933	3.86646	-2.52103	1.47057	-1.63445	-0.144928	-2.70852	2.03356	-1.7132	-2.38999	-0.387959	-3.97032
	7.46211	5.82514	-0.430542	0.150055	1.08929	1.80389	-0.900803	0.960297	2.93713	0.776749	1.05403	1.34629	1.65499	3.60066	4.14789	1.97474	4.59021	4.92882	1.95193	2.60991	2.4828	0.418381	0.0460281	1.3924	3.2126	1.9373	1.26577	2.10368	1.5643	-0.471992	3.69863		7.46211	-1.72107	1.03387	1.354	0.723759	1.34913	3.87046	-2.47369	1.56459	-1.59591	-0.0343513	-2.66059	2.0177	-1.64119	-2.48035	-0.416248	-3.91188
	7.47235	5.78871	-0.412853	0.0869217	1.10049	2.00804	-0.890991	0.871494	2.81966	0.979595	1.0489	1.29887	1.62622	3.72942	3.92777	1.96265	4.40542	4.95482	1.95353	2.70113	2.49783	0.545208	0.209621	1.40525	3.18916	1.92639	1.31311	2.06778	1.44947	-0.355392	3.69958		7.47235	-1.78082	0.944622	1.32874	0.695141	1.24252	3.88634	-2.44829	1.63888	-1.59841	-0.0256119	-2.68025	2.0376	-1.51429	-2.5092	-0.51952	-3.90641
	7.48259	5.82552	-0.28363	-0.0383835	1.11714	2.15427	-0.968048	0.854759	2.62209	1.19784	1.01756	1.23293	1.63547	3.88979	3.77474	1.97454	4.2979	4.98149	1.96079	2.7765	2.48162	0.54821	0.427238	1.53769	3.17638	1.86602	1.39929	2.00605	1.19923	-0.21405	3.67301		7.48259	-1.566	0.864307	1.30249	0.572639	1.3648	3.98678	-2.40475	1.77247	-1.63449	0.0197105	-2.6548	2.12108	-1.38935	-2.53422	-0.65152	-3.9852
	7.49283	5.88729	-0.210327	0.104313	1.11033	2.2478	-1.05099	0.704903	2.61639	1.27979	1.13644	1.24667	1.66871	3.81798	3.69201	1.94253	4.2151	5.02087	1.92824	2.78572	2.50564	0.653305	0.621407	1.48864	3.12975	1.73457	1.50481	1.85681	1.08207	-0.127502	3.61231		7.49283	-1.58003	0.878769	1.34786	0.39323	1.42805	4.04312	-2.25533	1.93341	-1.68414	-0.259312	-2.56229	2.15806	-1.35022	-2.51258	-0.754253	-4.00689
	7.50307	5.93143	-0.200733	0.196152	1.14651	2.31185	-1.09144	0.483124	2.61195	1.34162	1.11384	1.03973	1.77774	3.75947	3.64277	1.87354	4.1116	5.05287	1.79453	2.7538	2.64167	0.76659	0.770775	1.58426	2.92768	1.66694	1.66271	1.72659	1.05136	-0.0765381	3.57544		7.50307	-1.56588	0.941151	1.42073	0.323433	1.39777	4.18329	-2.16523	1.98526	-1.74389	-0.401752	-2.38495	2.06117	-1.23926	-2.47811	-0.903671	-3.9622
	7.51331	5.79871	-0.20649	0.189953	1.10738	2.34821	-1.03455	0.349728	2.55447	1.36044	1.00021	1.00942	1.95495	3.62679	3.5302	1.79942	3.97815	5.09841	1.7914	2.69187	2.79765	1.01996	0.987534	1.53724	2.88072	1.56977	1.74983	1.63582	1.07916	-0.00335693	3.50186		7.51331	-1.5874	1.01363	1.43395	0.306396	1.37323	4.19519	-2.10071	2.05081	-1.76773	-0.529118	-2.44623	2.02417	-1.14862	-2.42354	-0.888042	-4.03699
	7.52355	5.81112	-0.222321	0.248413	1.0381	2.40051	-1.10174	0.159996	2.51073	1.40293	0.984364	1.01233	2.0904	3.57211	3.37532	1.77516	3.88407	5.14173	1.72931	2.65608	2.90285	1.25471	1.13241	1.69177	2.9439	1.52	1.74651	1.50504	1.07534	0.0473289	3.53323		7.52355	-1.51631	0.971203	1.45626	0.328739	1.29737	4.30738	-2.00438	2.07288	-1.76048	-0.485199	-2.52781	1.90474	-1.13776	-2.44855	-0.826519	-4.07078
	7.53379	5.7331	-0.101826	0.372021	1.03043	2.55033	-0.929398	0.0623169	2.46688	1.56871	0.958313	1.07847	2.25518	3.41941	3.44302	1.80849	3.81334	5.07831	1.58615	2.65989	2.86099	1.40934	1.31799	1.83182	2.95573	1.45715	1.77496	1.36321	1.05605	0.134315	3.61524		7.53379	-1.5932	0.82169	1.60354	0.260441	1.39135	4.22539	-1.88403	2.08021	-1.71933	-0.499397	-2.51081	1.88977	-1.06128	-2.54006	-0.775581	-4.19687
	7.54403	5.61227	-0.0257568	0.361088	1.06609	2.65937	-0.771305	0.154633	2.36266	1.68479	0.89698	1.0322	2.32954	3.34255	3.39396	1.75208	3.86204	5.14186	1.4491	2.69738	2.82802	1.51402	1.45344	1.814	2.88031	1.33364	1.83994	1.29607	1.05092	0.251549	3.74614		7.54403	-1.60191	0.702923	1.63216	0.222698	1.4569	4.17256	-1.83124	2.14109	-1.56152	-0.573509	-2.41811	1.81208	-0.905247	-2.52358	-0.777405	-4.26102
	7.55427	5.56769	-0.0434952	0.399712	1.14342	2.71364	-0.670513	0.156883	2.31986	1.8	0.783375	1.03516	2.29837	3.33147	3.2478	1.79044	3.84576	5.11175	1.39543	2.82921	2.86404	1.61491	1.63459	1.70241	2.84	1.27441	1.84752	1.18038	1.02327	0.307144	3.79214		7.55427	-1.52398	0.54974	1.53593	0.2616	1.49204	4.12057	-1.81482	2.14045	-1.42419	-0.652294	-2.25418	1.71056	-0.774937	-2.45803	-0.74094	-4.32258
	7.56451	5.47763	0.0197449	0.500397	1.1055	2.78293	-0.716171	-0.0159454	2.23078	1.83583	0.659481	1.02903	2.32163	3.23857	3.0456	1.71201	3.78577	4.99446	1.33744	2.86167	2.86273	1.68494	1.79034	1.62367	2.77417	1.0436	1.8999	1.09071	1.0136	0.343147	3.70705		7.56451	-1.47348	0.52187	1.45814	0.263325	1.55574	4.09526	-1.8827	2.2451	-1.38782	-0.827404	-2.21569	1.72577	-0.709076	-2.40998	-0.657578	-4.33352
	7.57475	5.37951	0.0535889	0.60033	1.09313	2.96253	-0.559517	-0.102768	2.19624	1.93702	0.520805	1.17049	2.3358	3.20188	2.88012	1.6428	3.64718	4.86495	1.38525	2.91754	2.90264	1.72605	2.01265	1.65842	2.70942	0.853722	2.08186	1.0414	0.96138	0.348419	3.68021		7.57475	-1.43672	0.559097	1.44677	0.226589	1.64344	4.16775	-1.90861	2.3217	-1.39335	-0.834843	-2.23729	1.80825	-0.620502	-2.32222	-0.632389	-4.37216
	7.58499	5.23352	0.197033	0.625637	1.04504	2.99789	-0.504547	-0.170647	2.12973	2.11145	0.377312	1.34741	2.39628	3.15852	2.7434	1.62198	3.50394	4.64523	1.36199	2.92039	2.94566	1.92707	2.13416	1.75772	2.7208	0.800934	2.20074	0.961308	0.950447	0.478962	3.62004		7.58499	-1.30246	0.68602	1.43335	0.130848	1.72628	4.21265	-1.9579	2.38304	-1.42113	-0.8578	-2.19323	1.74814	-0.570457	-2.34242	-0.717823	-4.26184
	7.59523	5.07401	0.167088	0.558807	1.06193	3.05904	-0.571785	-0.314316	2.07663	2.22054	0.3382	1.4022	2.42293	3.09004	2.66009	1.46686	3.44612	4.61681	1.36477	2.87595	3.10121	2.03905	2.24532	1.83282	2.6778	0.68689	2.37433	0.837116	0.911667	0.548042	3.6621		7.59523	-1.27223	0.574299	1.42143	0.127415	1.65229	4.23655	-1.95114	2.46387	-1.36171	-0.795918	-2.13184	1.79145	-0.487762	-2.33974	-0.713917	-4.23802
	7.60547	4.94092	0.294689	0.624802	1.16382	3.06868	-0.436935	-0.270435	2.05289	2.20016	0.310768	1.32637	2.44376	2.9352	2.37419	1.51513	3.42612	4.53873	1.25397	2.86576	3.20849	2.17897	2.28334	1.88972	2.72481	0.644138	2.55517	0.713028	0.840561	0.675014	3.55519		7.60547	-1.3405	0.493069	1.37798	0.0391312	1.68597	4.20635	-1.88179	2.43574	-1.28928	-0.847191	-2.008	1.77179	-0.431007	-2.28621	-0.6702	-4.2295
	7.61571	4.89002	0.4105	0.642578	1.03672	3.11539	-0.325233	-0.24839	2.06465	2.20374	0.331429	1.43731	2.54164	2.88114	2.12947	1.6346	3.42178	4.43614	1.20044	2.88308	3.27341	2.21968	2.44448	1.97077	2.68792	0.615471	2.73418	0.547462	0.749592	0.740459	3.37577		7.61571	-1.24106	0.436146	1.40975	-0.0495872	1.69506	4.10106	-1.73754	2.42889	-1.20078	-0.933987	-1.89756	1.6635	-0.364941	-2.22568	-0.630482	-4.29495
	7.62595	4.84931	0.473766	0.728016	1.02885	3.06475	-0.293896	-0.200806	2.05016	2.22286	0.512867	1.6678	2.66251	2.71719	2.07632	1.74259	3.45761	4.29627	1.25245	3.04901	3.3608	2.30142	2.6582	2.03643	2.63578	0.539902	2.83786	0.503487	0.682083	0.799671	3.30969		7.62595	-1.09327	0.457043	1.42289	-0.0767288	1.6892	3.92925	-1.64585	2.46137	-1.16683	-0.938553	-1.77086	1.608	-0.266903	-2.19913	-0.516109	-4.29214
	7.63619	4.72938	0.610214	0.793411	1.03046	3.0853	-0.290901	-0.131126	2.05487	2.2264	0.571995	1.68825	2.7165	2.62747	1.82791	1.78469	3.48383	4.21471	1.26945	3.1501	3.41924	2.42341	2.7893	2.02951	2.67594	0.356403	2.86445	0.464409	0.690189	0.780373	3.21114		7.63619	-0.860874	0.434189	1.49702	0.0275536	1.79356	3.85054	-1.6516	2.4768	-1.09437	-0.961643	-1.53877	1.65705	-0.104004	-2.11024	-0.449627	-4.26659
	7.64643	4.58057	0.730316	0.909512	1.07013	3.19317	-0.284382	-0.00722122	1.99005	2.22727	0.535347	1.79379	2.72843	2.5278	1.73529	1.89093	3.45985	4.11256	1.24438	3.28155	3.37191	2.57081	2.90517	1.94007	2.6564	0.223427	2.93473	0.485317	0.729256	0.762943	3.15007		7.64643	-0.669476	0.318081	1.48862	0.109081	1.87651	3.93794	-1.6677	2.47506	-0.975723	-0.970631	-1.25084	1.68378	-0.0803795	-1.97638	-0.289398	-4.15369
	7.65667	4.47651	0.743465	1.08959	1.05946	3.30991	-0.261719	0.0914497	1.95567	2.32043	0.597363	1.86617	2.84805	2.47648	1.6431	1.94688	3.40805	3.95813	1.30856	3.35777	3.54643	2.6658	3.10028	2.04517	2.6935	0.136272	3.02767	0.449459	0.811199	0.875931	3.11666		7.65667	-0.453133	0.310726	1.40921	0.221447	1.95983	3.87087	-1.53399	2.37401	-0.898762	-1.0941	-1.0605	1.72786	-0.117786	-1.94831	-0.300758	-4.17389
	7.66691	4.35288	0.713341	1.27324	1.05064	3.36547	-0.191017	0.246742	2.10838	2.30443	0.581734	2.05972	2.85191	2.33256	1.54759	1.98502	3.34719	3.82261	1.36904	3.28687	3.73891	2.65005	3.16799	2.09227	2.74859	0.140491	3.0283	0.279106	0.879433	0.972046	3.02232		7.66691	-0.323444	0.416832	1.28719	0.298992	1.88868	3.73804	-1.50975	2.36433	-0.743275	-1.22436	-0.961681	1.74054	-0.0688744	-1.89474	-0.23946	-4.11058
	7.67715	4.25156	0.757401	1.37548	0.940361	3.35209	-0.0768394	0.444393	2.05754	2.45673	0.62254	2.0764	2.75732	2.15329	1.39193	2.04388	3.31964	3.59017	1.33115	3.26289	3.7847	2.75369	3.29573	2.10425	2.83002	0.26062	3.03804	0.251701	0.971741	1.05641	2.92197		7.67715	-0.188534	0.443012	1.11688	0.315125	1.92142	3.64532	-1.54117	2.31258	-0.545662	-1.31857	-0.890129	1.73038	-0.0646896	-1.82098	-0.214664	-4.12822
	7.68739	4.20884	0.743439	1.55849	0.77092	3.37918	-0.183662	0.542656	2.15501	2.52772	0.603287	2.11841	2.66639	2.12564	1.12508	2.15794	3.35799	3.55512	1.41747	3.21054	3.7765	2.95587	3.22223	2.08934	2.87877	0.270084	3.12056	0.202934	0.943031	1.13037	2.85508		7.68739	-0.0903053	0.350483	1.09953	0.297276	2.07667	3.59643	-1.52203	2.2039	-0.304096	-1.30393	-0.734982	1.73902	-0.0153732	-1.71378	-0.100857	-4.0646
	7.69763	4.06373	0.745346	1.71555	0.722912	3.42392	-0.16378	0.618259	2.27151	2.60133	0.690407	2.18342	2.63441	2.08926	1.00055	2.25928	3.38382	3.45228	1.47199	3.15811	3.77709	3.0671	3.15937	2.21411	2.87289	0.247139	3.18295	0.271751	0.97982	1.3236	2.77462		7.69763	0.0106506	0.346272	1.16536	0.249569	2.25242	3.47028	-1.40155	2.10034	-0.184528	-1.23795	-0.535587	1.92353	0.209721	-1.61182	0.108307	-3.94982
	7.70787	3.97478	0.745693	1.84209	0.799896	3.48828	-0.274368	0.740662	2.19624	2.57366	0.70919	2.14159	2.61497	2.0648	0.932865	2.47351	3.35595	3.30585	1.53965	3.06688	3.71111	3.21471	3.14471	2.218	2.85626	0.186409	3.21987	0.312344	1.03223	1.33195	2.5714		7.70787	0.0653419	0.326687	1.2107	0.359291	2.38691	3.43751	-1.36028	2.08222	-0.0851822	-1.01899	-0.316723	2.08187	0.344688	-1.49738	0.312252	-3.91031
	7.71811	3.94836	0.792316	2.05061	0.786926	3.51589	-0.211807	0.898018	2.15937	2.52979	0.657063	2.17492	2.63266	1.95239	0.847389	2.71737	3.31775	3.18189	1.58928	3.12343	3.78288	3.3447	3.08987	2.32951	2.76102	0.169483	3.30075	0.17305	1.1828	1.38201	2.41729		7.71811	0.151772	0.44643	1.09747	0.409489	2.51612	3.35404	-1.34934	1.99061	0.0583687	-0.956493	-0.173359	2.17196	0.390274	-1.42264	0.481491	-3.90386
	7.72835	3.90051	0.771011	2.19462	0.764874	3.49632	0.00535583	1.11466	2.02455	2.661	0.62764	2.22623	2.5679	1.82327	0.772728	2.76642	3.23769	2.92788	1.73586	3.23473	3.89783	3.46992	3.0348	2.34422	2.81334	0.11982	3.40652	0.151436	1.18893	1.48235	2.27913		7.72835	0.223869	0.547962	0.928371	0.509518	2.59365	3.39101	-1.25055	2.07486	0.152119	-0.897938	-0.00391769	2.27651	0.385578	-1.25775	0.747211	-3.9107
	7.73859	3.73916	0.788776	2.35705	0.729218	3.57141	0.177505	1.31884	1.96473	2.71199	0.631027	2.2358	2.58425	1.57006	0.697952	2.93272	3.19013	2.68966	1.85044	3.27131	3.95367	3.57394	2.89285	2.31643	2.83044	0.228729	3.58205	0.117603	1.26988	1.52587	2.11467		7.73859	0.148552	0.564068	0.891216	0.614388	2.64959	3.36422	-1.11851	2.05222	0.308662	-0.843769	0.193005	2.33133	0.593895	-1.12435	0.976475	-3.90144
	7.74883	3.65148	0.878136	2.48544	0.749535	3.66676	0.174667	1.53755	1.89748	2.74475	0.625839	2.19866	2.61111	1.28384	0.566772	3.07951	3.15962	2.50835	1.99712	3.31342	4.0483	3.79799	2.90022	2.27827	2.80042	0.264183	3.54947	0.0804825	1.46661	1.5634	2.08062		7.74883	0.184612	0.722523	0.982861	0.631733	2.69244	3.27621	-0.9893	2.05354	0.395733	-0.752132	0.360111	2.45909	0.779503	-0.943047	1.12222	-3.85659
	7.75907	3.55189	1.00267	2.66722	0.816933	3.70084	0.107719	1.77396	1.88639	2.69075	0.593212	2.20399	2.62753	1.148	0.488167	3.18592	3.2637	2.23985	2.06929	3.38707	4.05164	3.94525	2.94643	2.22068	2.87958	0.25	3.53936	0.0739517	1.47511	1.58732	1.98836		7.75907	0.303188	0.779133	1.01954	0.718182	2.66269	3.22887	-0.936634	1.97869	0.633427	-0.656574	0.516697	2.55091	0.858494	-0.77755	1.31193	-3.76064
	7.76931	3.41457	1.12671	2.83643	0.805454	3.70713	0.0963364	1.85168	1.88896	2.71585	0.585609	2.23512	2.55697	1.05973	0.334793	3.24178	3.25855	2.04321	2.13985	3.45631	3.99285	4.01867	2.99743	2.27822	2.91417	0.270298	3.59208	0.0685005	1.59243	1.70782	1.97562		7.76931	0.356586	0.836605	0.912792	0.831623	2.66594	3.08663	-0.814335	1.7996	0.940018	-0.609676	0.698872	2.63515	1.02591	-0.625748	1.44668	-3.69389
	7.77955	3.36981	1.10535	2.97285	0.62281	3.78228	0.0148926	2.09299	1.8732	2.70243	0.574284	2.30649	2.40083	0.934402	0.139183	3.47122	3.34287	1.80209	2.24776	3.46786	3.89346	4.12398	2.99266	2.24485	2.84933	0.350227	3.63285	0.0208054	1.71749	1.83378	1.95982		7.77955	0.394077	0.838547	0.914997	0.959927	2.80383	3.01378	-0.612862	1.68609	1.20808	-0.554165	0.866764	2.73906	1.05424	-0.385815	1.58702	-3.54672
	7.78979	3.29181	1.07419	3.09579	0.62355	3.90407	0.0575829	2.25489	1.85129	2.68946	0.581688	2.28888	2.41235	0.748604	-0.0265656	3.62677	3.37459	1.64101	2.34496	3.4539	3.84518	4.28546	2.92704	2.21236	2.83435	0.458614	3.58186	-0.0253639	1.87139	1.97034	2.02552		7.78979	0.434906	0.975147	0.842205	0.997025	2.95264	2.92781	-0.419132	1.56649	1.35556	-0.31554	0.908798	2.86371	1.15351	-0.213154	1.67463	-3.34653
	7.80003	3.06303	1.03269	3.20157	0.677444	4.0341	0.0623169	2.36495	1.74929	2.63203	0.754776	2.1959	2.45436	0.737671	-0.026947	3.74249	3.39545	1.60331	2.44403	3.47256	3.88887	4.47153	2.8797	2.38353	2.89448	0.490799	3.51451	-0.0519714	2.04362	2.04882	2.08254		7.80003	0.468822	1.08187	0.866039	1.17871	3.07666	3.08003	-0.249905	1.40548	1.59429	-0.0446129	0.942608	2.8879	1.28059	-0.0891762	1.9677	-3.26918
	7.81027	2.93212	1.0488	3.30668	0.701561	4.0783	0.0821381	2.46518	1.73254	2.65144	0.803104	2.1968	2.57722	0.614876	0.0309258	3.79137	3.43031	1.37334	2.40753	3.54258	3.89886	4.53639	2.93148	2.48328	2.95276	0.525169	3.54435	-0.113663	2.21114	2.03746	2.04878		7.81027	0.509815	1.20726	0.872723	1.28929	3.13912	3.07355	-0.0234413	1.28082	1.82835	0.18491	1.02037	2.88131	1.37195	0.0679436	2.07326	-3.1946
	7.82051	2.82011	1.00523	3.41759	0.686409	4.06425	0.101593	2.53712	1.62357	2.70322	0.799576	2.30699	2.6339	0.520542	-0.035759	3.89167	3.45048	1.15234	2.67493	3.5275	3.82362	4.53135	2.95057	2.51432	3.00379	0.474205	3.69215	-0.0830231	2.30703	2.10141	1.97661		7.82051	0.566833	1.29091	0.949532	1.38124	3.28399	3.0121	0.104755	1.30374	1.95054	0.363834	1.21453	2.91026	1.48372	0.236805	2.19292	-3.0361
	7.83075	2.82414	0.893692	3.44783	0.747494	4.09016	0.157036	2.68478	1.65	2.6492	0.854328	2.46465	2.70669	0.41769	-0.0955315	3.92819	3.4399	1.04249	2.80384	3.47789	3.64848	4.50961	2.93519	2.4431	3.04287	0.499481	3.78555	-0.116642	2.4343	2.17926	1.92873		7.83075	0.54509	1.46497	0.999481	1.48968	3.50803	3.09456	0.174183	1.34694	1.88287	0.572247	1.42729	2.93352	1.68918	0.389046	2.35768	-2.94668
	7.84099	2.82087	0.931038	3.55746	0.672737	4.23479	0.0427628	2.84846	1.57432	2.64223	0.861694	2.37904	2.72517	0.210526	-0.221737	3.96923	3.43477	0.970024	2.96746	3.52581	3.54961	4.65333	2.85854	2.39923	3.12618	0.63818	3.87298	-0.0247917	2.67365	2.31444	1.97031		7.84099	0.593487	1.64937	0.930828	1.66443	3.6211	3.01512	0.460499	1.27568	2.02611	0.684757	1.63594	2.99242	1.9268	0.537437	2.55703	-2.90023
	7.85123	2.85484	0.898006	3.72094	0.626877	4.4259	-0.104542	2.88284	1.45041	2.73637	0.870411	2.26283	2.69765	0.0855713	-0.197121	4.11372	3.47628	0.853245	3.01814	3.53059	3.2872	4.72709	2.74847	2.4477	3.23505	0.895576	4.05003	-0.122162	2.74007	2.46067	1.97127		7.85123	0.625496	1.86954	1.04862	1.82241	3.69693	2.84081	0.637455	1.19086	2.08984	0.670055	1.88438	3.00031	2.15393	0.721699	2.7654	-2.86296
	7.86147	2.77633	0.973907	3.95179	0.528412	4.54544	-0.183174	2.79923	1.38867	2.68307	0.874557	2.191	2.68472	-0.14151	-0.220032	4.19893	3.47454	0.666325	3.14501	3.58513	3.11044	4.77264	2.91318	2.41404	3.2697	1.05244	4.18134	-0.0599365	2.74702	2.65831	1.96871		7.86147	0.528339	1.97429	1.10865	1.90828	3.70312	2.72478	0.915913	1.1699	2.19069	0.707432	2.09181	3.07509	2.36312	0.94593	2.89093	-2.80653
	7.87171	2.63517	1.01995	4.0617	0.457138	4.60435	-0.214966	2.88313	1.29836	2.60381	0.903313	2.21708	2.79775	-0.252159	-0.311073	4.37955	3.341	0.608604	3.27108	3.59835	3.03228	4.8559	2.86248	2.39355	3.2259	1.32591	4.18346	-0.029274	2.90736	2.64293	1.86956		7.87171	0.547379	2.00092	1.32602	1.93668	3.78564	2.62435	1.11753	1.16865	2.19524	0.899189	2.28028	3.12862	2.55335	1.21061	2.91591	-2.66928
	7.88195	2.49039	1.09196	4.14353	0.434761	4.66656	-0.206871	2.86811	1.06217	2.55606	0.973	2.21841	2.98707	-0.357864	-0.595257	4.423	3.31959	0.633232	3.4132	3.60623	3.0088	4.90708	2.75206	2.33735	3.33048	1.43646	4.21784	-0.109882	2.98241	2.68517	1.85044		7.88195	0.724979	2.06793	1.47145	2.06535	3.85328	2.55555	1.27182	1.10803	2.3846	1.07507	2.59652	3.16851	2.81228	1.28479	2.95425	-2.38633
	7.89219	2.43614	1.13342	4.18004	0.323753	4.69397	-0.103447	2.80859	1.02286	2.60197	1.05147	2.18152	3.09978	-0.427921	-0.75161	4.46351	3.30959	0.708298	3.41348	3.59235	3.09097	4.94341	2.75869	2.26048	3.41859	1.5416	4.27944	-0.212334	3.04436	2.73434	1.83253		7.89219	0.747902	2.12714	1.54454	2.18145	3.9018	2.46673	1.40387	1.04442	2.66369	1.0934	2.82256	3.18229	3.10844	1.85563	3.09089	-2.03308
	7.90243	2.48864	1.17802	4.29212	0.351768	4.82912	-0.143967	2.8557	1.08798	2.5531	1.16588	2.12709	3.15416	-0.490673	-0.843128	4.54251	3.35151	0.819153	3.49436	3.61333	3.05457	5.05292	2.87624	2.25718	3.53067	1.72438	4.26645	-0.188084	3.10889	2.89201	1.81343		7.90243	0.775127	2.25211	1.63239	2.3493	3.92556	2.3667	1.61309	1.03136	2.89761	1.28784	2.97701	3.18896	3.43316	2.05923	3.13639	-1.90889
	7.91267	2.65534	1.16468	4.39896	0.200409	4.93765	-0.259491	2.94922	1.02135	2.5487	1.1242	2.05031	3.18295	-0.483459	-0.902794	4.62062	3.3614	0.884357	3.69411	3.51043	2.95876	5.51933	2.68583	2.23308	3.68575	2.00309	4.43154	-0.133644	3.28484	2.94912	1.85915		7.91267	0.862804	2.38863	1.66572	2.41819	3.99728	2.24531	1.73482	0.935978	2.93893	1.48882	3.2777	3.28329	3.68608	1.96154	3.24183	-1.80156
	7.92291	2.59431	1.28614	4.49796	0.177494	5.01895	-0.314842	2.91052	0.962082	2.48071	1.14741	2.00291	3.33832	-0.492714	-0.922165	4.59142	3.23182	1.01638	3.82067	3.37087	2.78999	5.7334	2.5917	2.21453	3.84658	2.17246	4.57972	-0.163052	3.39605	3.04737	1.93804		7.92291	1.05026	2.55979	1.7486	2.51778	4.13212	2.18558	1.89781	0.78487	2.98889	1.74946	3.49199	3.2838	3.84443	1.82809	3.24282	-1.64811
	7.93315	2.50512	1.34581	4.47874	0.146381	5.02179	-0.305878	2.85237	0.923508	2.4174	1.22284	1.80907	3.53127	-0.577957	-0.886162	4.63176	3.11736	1.19809	4.00502	3.35808	2.62256	5.73627	2.66232	2.22454	3.89806	2.31811	4.74	-0.0308456	3.32957	3.22074	1.95574		7.93315	1.16274	2.6349	1.82457	2.58363	4.2352	2.16443	2.09588	0.761562	3.04408	2.00233	3.72969	3.2923	4.16871	1.76117	3.30091	-1.47133
	7.94339	2.44746	1.39773	4.44756	0.162689	5.05506	-0.307484	2.82724	0.823978	2.38643	1.313	1.86508	3.61647	-0.704391	-0.784977	4.69789	3.0761	1.25537	4.11811	3.33805	2.5129	5.6349	2.7818	2.20975	3.83798	2.58858	4.78957	0.150696	3.39846	3.3586	1.98714		7.94339	1.22441	2.81988	1.96864	2.70669	4.25764	1.96367	2.15992	0.747303	3.08698	2.16323	3.90114	3.23979	4.44722	1.82129	3.37264	-1.18672
	7.95363	2.51767	1.48035	4.53021	0.148407	5.06939	-0.222202	2.72142	0.78812	2.40297	1.47537	1.85946	3.66352	-0.863678	-0.702091	4.70757	2.90312	1.35898	4.22317	3.23562	2.47279	5.48228	2.85176	2.25664	3.85377	2.75723	4.89563	0.349678	3.43528	3.41217	2.06055		7.95363	1.24545	3.0235	1.94439	2.86628	4.391	1.68501	2.23691	0.742085	3.20887	2.25291	4.03665	3.07624	4.79661	1.99881	3.4517	-0.908417
	7.96387	2.59091	1.33257	4.62982	0.161209	5.12396	-0.175507	2.67505	0.818661	2.304	1.53988	1.68501	3.59958	-1.03185	-0.686974	4.69193	2.83424	1.48472	4.19123	2.9957	2.35532	5.44167	2.83835	2.30202	3.92558	3.0029	4.947	0.420193	3.61747	3.39308	1.93793		7.96387	1.34699	3.15999	1.95575	2.99397	4.56471	1.56547	2.15895	0.77346	3.28613	2.40699	4.24468	2.8653	5.0708	2.16089	3.49028	-0.683804
	7.97411	2.52684	1.40883	4.70171	0.269287	5.17559	-0.199398	2.63168	0.845448	2.12434	1.62421	1.58484	3.6665	-1.03559	-0.589615	4.69917	2.79307	1.61161	4.24681	2.90786	2.31781	5.25231	2.80684	2.40989	3.89239	3.28541	5.12101	0.457745	3.65212	3.39954	1.79037		7.97411	1.39975	3.22552	2.00242	3.0193	4.61715	1.39796	2.0143	0.831989	3.28913	2.51575	4.46462	2.71075	5.38111	2.17966	3.5635	-0.39801
	7.98435	2.40134	1.58381	4.59278	0.22612	5.18213	-0.21059	2.56747	0.812881	2.10296	1.65289	1.55276	3.71809	-1.0321	-0.52652	4.73664	2.73417	1.63697	4.27008	2.78424	2.17348	5.23082	2.75365	2.43489	3.87138	3.50928	5.29387	0.476135	3.722	3.48822	1.72917		7.98435	1.42185	3.27636	2.07282	3.0899	4.57459	1.30978	2.07809	1.04484	3.41334	2.73139	4.68218	2.67835	5.6806	2.37812	3.56383	-0.190838
	7.99459	2.26709	1.69695	4.51564	0.315456	5.21678	-0.0582542	2.44152	0.754517	2.0792	1.72845	1.55677	3.73868	-1.02138	-0.579987	4.78336	2.68217	1.72526	4.21389	2.6365	2.02338	5.20451	2.71689	2.44277	3.7547	3.72342	5.37201	0.477402	3.76196	3.59551	1.79915		7.99459	1.48045	3.42014	2.09855	3.14622	4.47929	1.28106	2.13119	1.17335	3.84752	2.96181	4.85086	2.62798	5.78905	2.53872	3.53669	0.0274963
	8.00483	2.23209	1.79417	4.46476	0.352852	5.24016	0.148468	2.32914	0.680916	2.04592	1.72672	1.34649	3.75739	-1.04428	-0.695702	4.71003	2.54505	1.97884	4.23789	2.45908	1.83759	5.14524	2.67144	2.41433	3.68734	3.85735	5.37221	0.577095	3.87354	3.69808	1.82719		8.00483	1.55926	3.61567	2.10902	3.22279	4.37356	1.23406	2.21923	1.26294	3.78428	3.06782	5.01071	2.67194	6.01941	2.60566	3.6109	0.31319
	8.01507	2.13108	1.93092	4.36449	0.327961	5.39382	0.226788	2.22556	0.721802	1.84341	1.76521	1.31577	3.72092	-0.987679	-0.667198	4.69894	2.83067	2.15755	4.23237	2.33912	1.68476	5.08978	2.64544	2.3712	3.76662	3.97991	5.59158	0.672104	3.894	3.8287	1.92614		8.01507	1.66212	3.77882	2.22285	3.28993	4.46598	1.20593	2.30079	1.1847	3.69286	3.24169	5.21012	2.67756	6.31859	2.68154	3.61023	0.563541
	8.02531	2.00439	1.87312	4.23369	0.295345	5.45786	0.168198	2.1856	0.743034	1.68814	1.77424	1.32008	3.75765	-1.00227	-0.5364	4.87167	2.91735	2.3331	4.25797	2.23296	1.52374	5.08318	2.64822	2.33245	3.81395	4.08476	5.70647	0.755157	3.92199	3.8719	1.91415		8.02531	1.58798	3.9184	2.27609	3.4557	4.49161	1.11346	2.228	1.3261	3.42292	3.39439	5.35859	2.52501	6.58645	2.75959	3.54466	0.778908
	8.03555	2.01549	1.92594	4.19324	0.32901	5.47374	0.178604	2.08207	0.664619	1.46712	1.77871	1.25251	3.8469	-0.923546	-0.475594	4.77378	2.74815	2.53217	4.38961	2.14606	1.39143	5.13084	2.63612	2.33514	3.84745	4.27905	5.71435	0.904793	3.87846	3.97165	1.9447		8.03555	1.5138	3.99956	2.25757	3.563	4.48007	0.994556	2.27972	1.38308	3.3055	3.53189	5.49964	2.35148	6.87424	2.73662	3.51577	0.920242
	8.04579	1.99874	1.88268	4.1727	0.440399	5.58459	0.262573	1.92818	0.594608	1.38914	1.85972	1.225	3.86095	-0.839943	-0.549263	4.76259	2.55042	2.65419	4.41373	2.14193	1.3276	5.1148	2.63677	2.44897	3.83044	4.44178	5.78125	1.16333	3.99168	4.09633	2.01332		8.04579	1.50833	4.14103	2.34192	3.75679	4.36917	0.930626	2.30711	1.45922	3.2088	3.68002	5.46966	2.32991	6.99106	2.68945	3.65729	1.25626
	8.05603	1.94779	1.82673	4.19721	0.577145	5.73269	0.318172	1.78627	0.711838	1.40653	1.80284	1.28551	3.89526	-0.602478	-0.627441	4.76277	2.34812	2.84079	4.51077	2.04773	1.35036	5.01466	2.6641	2.64952	3.74171	4.59698	5.86369	1.42107	4.07983	4.03364	2.05526		8.05603	1.64006	4.38849	2.3764	3.89196	4.37181	0.89212	2.20924	1.53938	3.16464	3.74808	5.44761	2.23792	7.1626	2.8048	3.75616	1.57593
	8.06627	1.84955	1.89091	4.12094	0.708477	5.79004	0.245003	1.64626	0.719322	1.3006	1.73612	1.39189	3.88582	-0.438473	-0.596008	4.5113	2.28759	2.81877	4.54936	1.96164	1.28065	5.09866	2.53593	2.79871	3.61838	4.65488	5.78943	1.66571	4.25433	3.89526	2.08971		8.06627	1.74897	4.50087	2.457	4.02859	4.34492	0.762909	2.20843	1.69964	3.1635	3.84838	5.50659	2.15712	7.38493	2.7887	3.85186	1.84198
	8.07651	1.67476	1.95574	4.08651	0.76107	5.73961	0.284771	1.64021	0.645844	1.25536	1.66916	1.44946	3.87307	-0.353977	-0.537926	4.49112	2.18654	2.93977	4.60717	1.90447	1.11333	5.08097	2.58655	2.75562	3.45798	4.66504	5.8402	1.76215	4.25842	3.85304	2.15166		8.07651	1.86049	4.62386	2.44685	4.01152	4.39906	0.746685	2.31018	1.75895	3.22306	3.81365	5.53074	2.1226	7.44951	2.83151	4.00866	2.17641
	8.08675	1.47047	2.15664	4.0291	0.832047	5.78841	0.333839	1.58324	0.552551	1.11238	1.75704	1.4697	3.83324	-0.243195	-0.465889	4.50171	1.97442	3.1243	4.66156	1.9169	1.08469	5.06676	2.71496	2.81091	3.30097	4.85145	5.86396	1.82058	4.31124	3.88147	2.06304		8.08675	1.95759	4.76672	2.55342	4.06744	4.4222	0.724667	2.21911	1.83622	3.1229	3.86082	5.6061	2.15421	7.49658	2.82579	4.01002	2.53082
	8.09699	1.33268	2.26354	3.84857	0.74313	5.83127	0.493767	1.54514	0.561729	1.12899	1.83472	1.55819	3.77494	-0.0841331	-0.58168	4.59605	1.94629	3.29671	4.74747	1.87744	1.04166	4.92869	2.72574	2.79359	3.16092	5.03646	5.79454	2.03327	4.31552	3.86361	1.93283		8.09699	2.0394	4.83443	2.58099	4.24598	4.45617	0.729782	2.08834	1.9016	2.97516	3.92942	5.66249	2.28816	7.66227	3.0877	4.10857	2.76523
	8.10723	1.18684	2.33133	3.7187	0.754814	5.89507	0.679855	1.50978	0.549522	0.89225	1.83653	1.61256	3.78968	0.265457	-0.487274	4.46842	1.94068	3.4986	4.83504	1.88339	1.00191	4.88114	2.54836	2.78533	3.10047	5.18252	5.74872	2.25753	4.22572	4.01833	1.91965		8.10723	2.10625	4.90548	2.67523	4.45726	4.45349	0.73814	2.07	1.94089	2.82864	4.00361	5.70806	2.32086	7.76951	3.24591	4.21681	3.01711
	8.11747	1.07459	2.48429	3.56451	0.772133	5.89656	0.735764	1.39511	0.531212	0.746109	1.7519	1.53202	3.7982	0.55304	-0.458595	4.32662	1.99258	3.63195	4.80485	1.93789	0.937477	4.66822	2.38644	2.80927	3.06503	5.34804	5.71013	2.48566	4.22867	4.11724	1.92777		8.11747	2.27986	4.98158	2.83827	4.4929	4.43579	0.751072	2.17981	1.97334	2.75542	4.0731	5.76324	2.44972	7.85212	3.29728	4.31229	3.25735
	8.12771	1.04288	2.55081	3.44849	0.775459	6.04937	0.762646	1.27433	0.538696	0.572746	1.80657	1.6367	3.83083	0.852432	-0.481087	4.28212	1.95135	3.79911	4.76923	1.93904	0.836269	4.6092	2.27398	2.95294	2.97828	5.49337	5.72366	2.59422	4.33478	4.13032	2.01913		8.12771	2.33119	5.18643	3.02925	4.5466	4.45164	0.702614	2.22226	2.02069	2.75219	4.27545	5.69714	2.53857	7.90394	3.41518	4.34701	3.50026
	8.13795	0.917175	2.68301	3.29588	0.792961	6.04561	0.674179	1.11368	0.547462	0.440674	1.78718	1.71477	3.86489	1.07357	-0.39856	4.24929	1.93462	3.84695	4.71078	1.8277	0.730686	4.51882	2.22363	2.98412	2.92826	5.68737	5.74267	2.74628	4.32314	4.04107	2.06036		8.13795	2.51606	5.37141	3.20267	4.59293	4.51073	0.572365	2.15991	2.08923	2.76089	4.54057	5.53584	2.54451	7.90359	3.53267	4.49257	3.74861
	8.14819	0.85371	2.66543	3.12986	0.995461	5.97854	0.580399	1.10599	0.607399	0.359051	1.77294	1.7751	3.79751	1.30376	-0.415176	4.25091	1.96698	3.95628	4.58616	1.84052	0.560539	4.32477	2.15511	3.01271	2.90394	5.85298	5.75219	2.87445	4.34304	3.95433	2.14585		8.14819	2.69148	5.43806	3.28594	4.62215	4.49404	0.491291	2.13191	2.23299	2.73851	4.69779	5.56415	2.46345	7.86906	3.6377	4.60755	3.86539
	8.15843	0.768738	2.67437	2.92449	1.05541	5.83363	0.588562	1.09801	0.708527	0.330845	1.90092	1.8377	3.84356	1.59326	-0.472828	4.26562	1.78991	3.98544	4.60804	1.9079	0.477104	4.24507	2.07851	3.05582	2.91422	5.86144	5.796	3.12567	4.25516	4.02302	2.32943		8.15843	2.82751	5.43744	3.38617	4.67214	4.32369	0.50172	2.14424	2.18184	2.63996	4.85366	5.5327	2.43801	7.89446	3.75337	4.70395	4.12307
	8.16867	0.734787	2.66413	2.88791	1.13658	5.79234	0.61367	1.08059	0.744308	0.300983	1.87067	1.95679	3.65419	1.94401	-0.422092	4.22871	1.83451	4.02452	4.57536	1.78957	0.356239	4.11592	2.07595	3.02241	2.91241	5.86588	5.75351	3.42065	4.21087	4.00498	2.2888		8.16867	2.83201	5.55119	3.45074	4.69484	4.20502	0.640865	2.00155	2.30132	2.53366	4.86593	5.5074	2.45586	7.98084	3.82434	4.8549	4.28557
	8.17891	0.638393	2.5611	2.82833	1.28275	5.75747	0.76038	1.03052	0.798779	0.206284	1.92397	1.97838	3.52513	2.21379	-0.331314	4.07601	1.89698	3.97308	4.67095	1.73437	0.18523	4.01782	2.04106	2.9576	2.79102	5.9374	5.53617	3.69281	4.22768	3.94644	2.26058		8.17891	2.8849	5.59524	3.60562	4.81966	4.18861	0.690681	1.95461	2.47068	2.439	4.85347	5.5567	2.41533	8.11138	3.81494	4.99626	4.41651
	8.18915	0.578144	2.6254	2.67815	1.36923	5.70436	0.870186	0.998287	0.835243	0.102928	1.87713	2.03394	3.51501	2.45978	-0.205692	4.04828	1.98974	3.91112	4.65632	1.74683	-0.00246429	3.89035	2.06084	2.94042	2.73788	5.98177	5.35418	3.89195	4.19581	4.02171	2.31514		8.18915	3.00517	5.62415	3.70992	4.9246	4.15625	0.72654	1.96825	2.55269	2.3565	4.9435	5.56741	2.41235	8.1346	3.83078	5.13182	4.49906
	8.19939	0.491585	2.68969	2.59687	1.39899	5.54687	0.942066	1.01985	0.951389	0.0936546	1.90851	1.90866	3.51492	2.76226	-0.17485	4.01013	2.02939	3.92584	4.60295	1.80204	0.0348129	3.76779	2.0516	2.98444	2.53753	6.08176	5.32556	4.21105	4.13699	4.02776	2.33755		8.19939	3.13274	5.70927	3.92106	5.00593	4.06994	0.857479	2.07904	2.43499	2.30088	5.10332	5.43243	2.39372	8.06425	3.86584	5.21514	4.58525
	8.20963	0.393097	2.81752	2.58942	1.53019	5.55562	1.04395	0.962799	1.08295	-0.0272942	1.94566	1.86382	3.534	3.09469	-0.180931	4.12974	1.978	3.97955	4.63066	1.83838	-0.0290947	3.7296	1.89867	2.89227	2.33395	6.12932	5.18423	4.53362	4.10321	3.92318	2.387		8.20963	3.24081	5.7825	3.92218	5.02858	4.11479	0.858601	2.20769	2.41214	2.19564	5.30019	5.3884	2.46796	8.11114	3.83608	5.2667	4.80351
	8.21987	0.337021	2.80005	2.42806	1.58235	5.48755	1.12813	0.841774	1.10683	-0.0946732	2.00559	1.82348	3.5193	3.35446	-0.286537	4.03179	1.97295	4.04192	4.73479	1.82116	-0.0332069	3.61604	1.9141	2.81839	2.28413	6.20398	5.08756	4.62557	4.10947	3.76083	2.41154		8.21987	3.27083	5.83036	3.90171	4.96381	4.04386	0.906078	2.24894	2.50012	2.21955	5.36615	5.38663	2.57037	8.17812	3.82555	5.32239	5.08853
	8.23011	0.450256	2.75923	2.22816	1.63292	5.45856	1.18708	0.863758	1.17895	-0.148388	2.0173	1.78506	3.50527	3.54552	-0.314434	4.00894	1.92694	4.08596	4.77637	1.77505	0.0719337	3.47849	1.91101	2.66668	2.1845	6.21829	5.08751	4.77589	4.06818	3.63855	2.39313		8.23011	3.40519	5.84908	3.93751	4.94623	3.9195	0.928383	2.29144	2.54625	2.26714	5.47115	5.35498	2.72283	8.2681	3.88321	5.44476	5.17551
	8.24035	0.439861	2.73644	2.04531	1.67082	5.32309	1.23417	0.900059	1.26262	-0.173862	1.93022	1.77112	3.53828	3.70675	-0.25148	4.02288	1.92585	4.11107	4.67669	1.85466	0.069397	3.41794	1.82441	2.61307	2.19335	6.31638	5.00833	4.94265	4.11091	3.46713	2.33049		8.24035	3.65912	5.97146	3.97383	4.89727	3.89011	1.10294	2.28954	2.52839	2.318	5.47933	5.27636	2.92113	8.3998	3.87673	5.55708	5.16357
	8.25059	0.319283	2.75956	1.93858	1.65329	5.22227	1.27531	0.993103	1.34701	-0.189194	1.90442	1.87238	3.47176	3.89771	-0.154884	3.9961	2.02975	4.15469	4.72945	1.88536	0.0897903	3.39084	1.87557	2.60173	1.94084	6.37824	4.95691	5.06931	4.16813	3.35139	2.29874		8.25059	3.76525	6.06675	3.92713	4.83566	3.95767	1.12589	2.35422	2.51836	2.24394	5.50784	5.13667	3.02639	8.49041	3.83191	5.66216	5.2272
	8.26083	0.276817	2.95854	1.85546	1.72489	5.07714	1.34003	1.0232	1.41316	-0.279243	1.91553	2.0276	3.46712	4.09562	-0.0845757	4.12231	2.08618	4.19169	4.82067	1.91608	0.0321541	3.26839	1.84268	2.537	1.77217	6.40958	4.83346	5.24174	4.19813	3.29398	2.21365		8.26083	3.80735	6.11123	3.82168	4.89121	4.05064	1.19424	2.43462	2.50751	2.12113	5.72357	5.10509	3.15576	8.4943	3.78961	5.93731	5.35467
	8.27107	0.106339	3.04527	1.79373	1.73498	4.93992	1.38262	1.08214	1.47069	-0.320908	2.00595	2.07172	3.46069	4.38899	-0.17495	4.18972	2.11368	4.18906	4.97095	1.91741	-0.0286789	3.05859	1.74517	2.48734	1.63091	6.47283	4.70691	5.57673	4.11031	3.34663	2.23906		8.27107	3.78597	6.12544	3.83758	5.01174	3.98983	1.37594	2.44399	2.57158	2.08297	5.83504	5.19527	3.20621	8.4245	3.80401	6.04464	5.51135
	8.28131	0.0350418	3.10219	1.75145	1.73195	4.83538	1.52316	1.1295	1.55353	-0.331135	1.97599	2.01972	3.47292	4.66724	-0.0721512	4.28126	1.9593	4.21815	5.04847	1.88581	-0.210663	3.00457	1.76255	2.34476	1.52563	6.4157	4.56232	5.74311	3.93851	3.29795	2.22307		8.28131	3.88934	6.10741	3.81264	5.08065	3.9264	1.45755	2.54345	2.60614	2.08459	5.834	5.28931	3.26703	8.4116	3.85095	6.03805	5.47941
	8.29155	-0.0489082	3.24689	1.68462	1.79981	4.75634	1.60689	1.07727	1.68648	-0.273296	1.96021	1.93432	3.41193	4.90823	0.0435867	4.3428	1.84496	4.13457	5.11669	1.88754	-0.206215	2.9231	1.85576	2.19738	1.22086	6.39637	4.4577	5.85226	3.9371	3.15016	2.23095		8.29155	3.96287	6.18408	3.8628	5.07533	3.86278	1.45147	2.59658	2.57903	2.03052	5.88565	5.33255	3.29775	8.37211	3.89864	5.94327	5.48788
	8.30179	-0.13176	3.31803	1.63736	1.68608	4.68403	1.81064	0.990788	1.87307	-0.197525	2.01183	1.97923	3.25533	4.99744	0.211861	4.50529	1.86594	4.06549	5.11736	1.94718	-0.223549	2.86451	1.92534	2.09655	1.01509	6.38006	4.31844	5.98292	4.08795	3.06269	2.22197		8.30179	3.9687	6.17158	3.91685	4.98905	3.71157	1.44896	2.61462	2.55695	1.99305	5.89493	5.24437	3.21587	8.53687	3.87508	5.93296	5.52682
	8.31203	-0.266464	3.30637	1.62609	1.76506	4.50572	1.80408	0.859859	1.96209	-0.228008	1.93468	1.96927	3.0986	5.12085	0.301781	4.5204	1.89242	3.98552	5.00342	1.967	-0.237103	2.8302	1.99268	2.0041	0.897411	6.39797	4.25777	6.1	4.11045	3.00809	2.09692		8.31203	3.8923	6.10577	4.07274	5.10376	3.66457	1.49759	2.5023	2.79066	2.01414	5.95086	5.12655	3.19963	8.57827	3.90492	6.03658	5.59004
	8.32227	-0.331337	3.30795	1.53136	1.82996	4.19397	1.83574	0.801746	2.0212	-0.357399	1.85537	1.91476	3.04624	5.29659	0.378792	4.42633	1.91093	3.93734	4.92488	1.95169	-0.256866	2.67914	2.00112	1.84833	0.734474	6.42407	4.21174	6.14623	4.01278	2.95607	2.06318		8.32227	3.84	5.99718	4.09735	5.04202	3.57418	1.58226	2.51474	2.80148	2.14258	5.9109	5.05726	3.31158	8.55573	3.94131	6.09532	5.72205
	8.33251	-0.412605	3.37575	1.52398	1.85221	3.93012	1.84998	0.771324	2.06565	-0.301323	1.78167	1.84868	2.89295	5.36917	0.395531	4.38437	1.94479	3.90964	4.80556	1.96626	-0.321659	2.60323	1.82839	1.74174	0.646893	6.50658	4.0347	6.24839	4.02806	2.90748	1.86423		8.33251	3.76723	5.98277	3.99944	5.01071	3.64571	1.64577	2.42922	2.79897	2.33795	5.91106	5.05636	3.35453	8.54742	3.95382	6.19101	5.78061
	8.34275	-0.493095	3.3948	1.45978	1.81471	3.68978	1.89779	0.863708	2.16201	-0.190216	1.76969	1.72474	2.79806	5.4827	0.455536	4.4849	1.89249	3.91579	4.65392	1.88446	-0.320488	2.50123	1.79839	1.68169	0.519661	6.46909	3.72638	6.35645	4.08042	2.82926	1.85035		8.34275	3.75935	5.87717	3.98266	4.92025	3.61529	1.61391	2.33458	2.91204	2.37785	6.04423	4.98576	3.43151	8.50977	3.99931	6.24322	5.98012
	8.35299	-0.564178	3.313	1.45158	1.77495	3.51089	2.02585	0.794701	2.15659	-0.20536	1.76872	1.61179	2.72491	5.64824	0.522011	4.49741	1.84051	3.9319	4.55334	1.86218	-0.45961	2.44463	1.6834	1.58136	0.398045	6.36053	3.55782	6.4283	4.05332	2.8419	1.86581		8.35299	3.78804	5.87321	3.89296	4.79979	3.56589	1.64105	2.24462	2.99949	2.35606	6.13497	4.92095	3.50903	8.47122	3.96376	6.2791	6.02961
	8.36323	-0.559181	3.25102	1.391	1.78824	3.30085	2.07168	0.851753	2.27415	-0.246914	1.7058	1.55895	2.66157	5.84636	0.71867	4.44847	1.83607	3.86386	4.33011	1.69784	-0.473938	2.36156	1.59544	1.57809	0.234692	6.24572	3.45065	6.62365	4.08873	2.85759	1.97479		8.36323	3.97679	5.93533	3.88252	4.67826	3.49401	1.65513	2.20619	3.05793	2.48996	6.15439	4.90465	3.5871	8.36056	3.80192	6.31208	6.17341
	8.37347	-0.622543	3.27226	1.29519	1.72462	3.14217	2.16748	0.891891	2.45575	-0.25724	1.74907	1.52428	2.57733	5.94894	0.87624	4.42915	1.80869	3.84013	4.21602	1.6344	-0.497719	2.17093	1.67742	1.60937	0.0146065	6.13872	3.41235	6.75327	4.076	2.86743	1.92832		8.37347	3.98522	5.9961	3.80282	4.67872	3.40449	1.66257	2.23318	2.94986	2.56208	6.01119	4.99057	3.64501	8.22782	3.70989	6.29564	6.26866
	8.38371	-0.737831	3.21413	1.24106	1.71216	2.9109	2.2142	0.8675	2.53474	-0.298283	1.63546	1.47838	2.42391	5.98984	1.03064	4.4419	1.72695	3.83751	4.04649	1.66507	-0.572285	1.88651	1.72259	1.63582	0.10405	6.06463	3.39015	6.75456	4.01329	2.97846	1.76224		8.38371	4.02083	5.95621	3.70058	4.75388	3.39976	1.68209	2.31647	2.91698	2.62106	5.91232	4.92495	3.63399	8.11545	3.55698	6.23592	6.34739
	8.39395	-0.722061	3.1497	1.19395	1.65078	2.71273	2.38779	0.84111	2.61897	-0.247749	1.57911	1.38749	2.29091	6.11781	1.18361	4.30086	1.65502	3.77145	3.9897	1.6202	-0.671516	1.7442	1.85775	1.59261	0.17733	5.9179	3.32544	6.91706	3.84474	3.05633	1.67109		8.39395	4.03462	5.78412	3.60791	4.76732	3.2518	1.76389	2.21693	2.85292	2.67194	5.77031	4.80362	3.74053	8.05711	3.62289	6.08527	6.34465
	8.40419	-0.812096	3.02782	1.17719	1.59066	2.59908	2.53683	0.859276	2.59648	-0.131554	1.605	1.21533	2.08763	6.09994	1.34457	4.34088	1.66972	3.64541	3.8619	1.47498	-0.796051	1.55952	1.9641	1.57199	0.191429	5.78568	3.30998	7.00877	3.65433	3.08495	1.58582		8.40419	4.08257	5.53797	3.57175	4.93664	3.07755	1.8451	2.1256	2.80703	2.77645	5.82433	4.7815	3.69766	7.99466	3.68309	6.00564	6.3648
	8.41443	-0.991543	3.04985	1.25661	1.51259	2.59787	2.87757	0.9916	2.61054	-0.096756	1.68481	1.18253	2.02757	5.99081	1.58772	4.28504	1.75719	3.55582	3.80742	1.35191	-0.868187	1.49328	2.03182	1.54215	0.110092	5.72645	3.26859	7.02389	3.5359	3.06188	1.58971		8.41443	4.11227	5.23867	3.6573	4.92603	2.98447	1.75236	2.01508	2.73631	2.83257	5.9016	4.7697	3.69046	7.82598	3.71899	6.04218	6.33207
	8.42467	-1.2259	3.02227	1.13131	1.49852	2.53931	3.06454	1.14705	2.62672	0.0184822	1.64718	1.30246	1.89115	5.8876	1.64027	4.41581	1.74611	3.50999	3.74323	1.47609	-0.911327	1.46213	1.98035	1.50629	-0.0770035	5.49467	3.20102	6.92996	3.38248	3.05228	1.57269		8.42467	4.07376	4.95923	3.58283	4.87992	2.94376	1.71942	2.0493	2.71861	2.98551	5.8849	4.85852	3.64205	7.72579	3.74188	6.01626	6.25322
	8.43491	-1.344	3.0052	1.17784	1.50173	2.35378	3.20481	1.13921	2.64739	0.112621	1.63065	1.16297	1.78669	5.81024	1.71762	4.5323	1.75642	3.32275	3.59978	1.57236	-0.935814	1.45789	1.97105	1.53152	-0.144276	5.34231	3.09874	7.01194	3.26084	3.07487	1.47078		8.43491	4.06362	4.84381	3.4759	4.85472	2.77295	1.69727	1.96952	2.70737	2.95482	5.70287	4.81758	3.66327	7.6865	3.79267	6.00502	6.2229
	8.44515	-1.43237	2.96475	1.26845	1.42165	2.32689	3.41876	1.07605	2.57795	0.233917	1.60306	1.02923	1.54338	5.76005	1.81252	4.57235	1.72218	3.22837	3.54012	1.63688	-0.922222	1.40281	2.01831	1.55914	-0.253342	5.15747	2.90465	7.07808	3.22744	3.15323	1.4503		8.44515	3.90359	4.6951	3.45165	4.84741	2.71489	1.61549	1.79256	2.70665	3.03915	5.60205	4.71153	3.74051	7.57622	3.75643	5.9878	6.21199
	8.45539	-1.60839	2.94713	1.34741	1.32491	2.14851	3.61018	0.995079	2.59407	0.322716	1.52354	0.850513	1.50888	5.66237	1.95643	4.51756	1.684	3.22697	3.45943	1.43591	-0.980206	1.35535	2.0358	1.50145	-0.245876	4.93065	2.86217	7.00295	3.10917	3.15895	1.39168		8.45539	3.77941	4.54548	3.57806	4.74206	2.72515	1.56676	1.63612	2.68071	3.16837	5.50755	4.51856	3.73258	7.36402	3.69312	5.99201	6.09389
	8.46563	-1.68572	2.91816	1.41209	1.2855	2.14253	3.60275	1.12569	2.62543	0.464493	1.56104	0.76281	1.41012	5.53817	2.04038	4.45663	1.65031	3.14534	3.25377	1.33307	-1.18012	1.33286	2.07148	1.40025	-0.259609	4.74785	2.8062	6.96222	2.92574	3.16642	1.3878		8.46563	3.7649	4.36264	3.6064	4.61978	2.82459	1.45293	1.48138	2.67223	3.2399	5.46334	4.40572	3.85701	7.17631	3.71453	5.91254	6.05141
	8.47587	-1.68343	2.73407	1.36784	1.32915	2.05068	3.65947	1.27101	2.63508	0.571838	1.47912	0.697556	1.35465	5.38075	2.18351	4.44174	1.8185	3.1074	3.05697	1.31333	-1.29271	1.34198	2.18078	1.33678	-0.180408	4.48976	2.79377	6.95867	2.70771	3.22715	1.40819		8.47587	3.88781	4.13032	3.56993	4.47144	2.72632	1.3611	1.48755	2.68543	3.30353	5.40519	4.42859	3.85508	7.0663	3.75637	5.82247	5.9384
	8.48611	-1.65939	2.64312	1.37334	1.26211	1.98417	3.75628	1.46388	2.57399	0.668007	1.51151	0.681633	1.14592	5.17121	2.31785	4.43769	1.96747	3.10876	2.98347	1.26338	-1.38255	1.20317	2.30733	1.36586	-0.160522	4.25079	2.78587	6.90169	2.46135	3.14465	1.48921		8.48611	3.83201	4.01004	3.5514	4.44151	2.5433	1.26354	1.42038	2.73808	3.36547	5.27105	4.41348	3.92486	6.88669	3.75176	5.72448	5.87553
	8.49635	-1.67248	2.57402	1.34471	1.22393	1.94949	3.95934	1.52155	2.66083	0.721447	1.50174	0.610855	0.932877	5.07895	2.44536	4.44537	2.0624	3.03175	2.92968	1.21758	-1.33789	1.1084	2.49869	1.34322	-0.0614853	4.07138	2.76163	6.80974	2.2155	3.1518	1.46181		8.49635	3.71696	3.87877	3.58538	4.39456	2.38127	1.25016	1.35924	2.85696	3.49507	5.18762	4.36894	3.97984	6.61917	3.58176	5.62565	5.76608
	8.50659	-1.69776	2.38215	1.41757	1.13004	1.87515	4.11435	1.61192	2.76536	0.947765	1.52041	0.582352	0.81591	4.94601	2.56682	4.36869	2.10774	2.99796	2.90733	1.08245	-1.30682	0.968449	2.60575	1.28681	-0.0284042	3.89501	2.74051	6.75639	2.1112	3.26521	1.37015		8.50659	3.84656	3.78918	3.53442	4.37885	2.20072	1.29786	1.27364	2.82383	3.51543	5.14515	4.23254	3.96423	6.34486	3.55237	5.55988	5.78002
	8.51683	-1.69913	2.18791	1.46935	1.07463	1.78805	4.25601	1.6552	2.74577	1.06061	1.61383	0.524334	0.646904	4.83007	2.4516	4.40969	2.06691	3.00275	2.78495	1.02531	-1.29122	0.9216	2.72121	1.32141	-0.00233459	3.64794	2.65845	6.6572	2.01949	3.24886	1.31799		8.51683	3.94154	3.60739	3.5947	4.18588	2.14097	1.32694	1.30577	2.7741	3.61971	5.07438	4.16651	3.82187	5.99888	3.58455	5.37179	5.73565
	8.52707	-1.74987	2.1319	1.50168	1.13845	1.67568	4.3401	1.71457	2.78298	1.24827	1.67982	0.516396	0.531368	4.66787	2.3719	4.24775	2.09044	3.06332	2.70177	0.936035	-1.34838	0.84304	2.79948	1.3173	0.128311	3.55978	2.62637	6.59371	1.90514	3.20264	1.30712		8.52707	3.85349	3.37963	3.67282	4.01749	2.17711	1.30674	1.1846	2.68734	3.64914	4.96431	4.07758	3.73244	5.63821	3.54442	5.25526	5.60648
	8.53731	-1.86404	2.1064	1.58767	1.17384	1.68143	4.42559	1.85488	2.7097	1.5374	1.6983	0.440102	0.425781	4.52112	2.37857	4.12838	2.11848	3.13593	2.59663	0.858452	-1.36533	0.761429	2.88138	1.34492	0.240437	3.3386	2.53365	6.53183	1.77653	3.27516	1.30934		8.53731	3.80806	3.21764	3.64628	3.84956	2.15368	1.23481	1.00368	2.58781	3.64938	4.88229	4.03067	3.70036	5.39896	3.4316	5.09929	5.55251
	8.54755	-1.86332	2.04821	1.5732	1.17293	1.49036	4.53953	1.82124	2.64758	1.62508	1.64818	0.342621	0.247017	4.50226	2.47542	3.99912	2.06714	2.98198	2.38005	0.820877	-1.38054	0.719921	2.98918	1.42989	0.313274	3.16422	2.44222	6.44308	1.74377	3.28117	1.33384		8.54755	3.80783	3.01751	3.7015	3.73461	2.01041	1.23491	0.994377	2.46987	3.77551	4.8479	3.90266	3.70238	5.0932	3.43914	4.96984	5.39736
	8.55779	-1.8341	1.97437	1.6976	1.07932	1.357	4.60453	1.81219	2.60433	1.87351	1.63177	0.246075	0.141983	4.40085	2.49443	3.94192	2.03081	2.84531	2.1867	0.783508	-1.22369	0.708618	3.07273	1.48738	0.348454	2.84949	2.40198	6.40679	1.64044	3.21291	1.27801		8.55779	3.67125	2.78943	3.71025	3.55154	1.98678	1.24493	0.98645	2.42161	3.97273	4.84405	3.86198	3.73709	4.83031	3.38908	4.66723	5.25957
	8.56804	-1.85091	1.87163	1.69344	1.0294	1.19546	4.66469	1.82154	2.6232	2.14247	1.72098	0.27478	0.0730667	4.34709	2.51333	3.88078	1.94527	2.77957	2.04257	0.737053	-1.20054	0.605766	3.1144	1.56311	0.371197	2.6267	2.38615	6.21723	1.34671	3.15829	1.27775		8.56804	3.47591	2.72161	3.61629	3.43153	1.94168	1.13509	0.876194	2.47241	4.06097	4.8567	3.86484	3.76812	4.62339	3.35557	4.48887	5.03738
	8.57827	-1.84254	1.79337	1.78994	1.04683	1.18558	4.69243	1.81475	2.69732	2.47951	1.73672	0.20813	-0.0498734	4.24923	2.50716	3.84714	2.08231	2.75684	2.01746	0.780956	-1.17654	0.343399	3.19797	1.43453	0.384071	2.38772	2.3618	6.06542	1.20703	3.17712	1.20553		8.57827	3.30147	2.60597	3.5615	3.35386	2.06793	1.12713	0.712162	2.45285	4.15216	4.76355	3.80202	3.6665	4.28584	3.39732	4.33603	4.8439
	8.58851	-1.83025	1.65736	1.97371	1.10257	1.22858	4.66978	2.01983	2.71809	2.77461	1.90117	0.105659	-0.0571327	4.07077	2.49226	3.8052	2.29197	2.60329	1.9834	0.681534	-1.17197	0.288239	3.27438	1.37466	0.414471	2.12505	2.30223	6.09762	1.05809	3.10751	1.13855		8.58851	3.23983	2.5883	3.58532	3.24852	2.09125	1.06411	0.586872	2.40943	4.20036	4.70806	3.5732	3.50912	3.92381	3.25246	4.09306	4.58909
	8.59875	-1.73599	1.53875	2.07991	1.09026	1.30844	4.68491	2.09669	2.50624	2.99981	2.05865	0.0956192	-0.169716	3.89401	2.38525	3.81257	2.41663	2.45469	1.90154	0.58036	-1.17487	0.13739	3.34617	1.3276	0.518803	1.91679	2.21983	6.06404	0.889591	2.98554	1.16006		8.59875	3.24417	2.61739	3.521	3.21009	2.10269	1.02876	0.475735	2.4584	4.34976	4.5684	3.41303	3.51281	3.5904	3.10116	3.99929	4.17736
	8.60899	-1.73922	1.4795	2.11304	1.03232	1.27666	4.66067	2.08439	2.38647	3.2807	2.0892	0.159481	-0.32626	3.73518	2.33163	3.76064	2.38154	2.34528	1.85093	0.498798	-1.08878	0.0419769	3.37191	1.28946	0.646618	1.80455	2.31013	6.12177	0.745514	3.00174	1.19926		8.60899	3.35112	2.41532	3.5418	3.23873	1.99144	1.00256	0.419788	2.39482	4.47182	4.48249	3.45067	3.38694	3.38145	3.01192	3.84802	3.987
	8.61924	-1.81329	1.37371	2.20576	0.958851	1.1882	4.71511	1.97777	2.30075	3.62712	2.17719	0.21167	-0.455055	3.65087	2.3135	3.75051	2.35163	2.21093	1.85243	0.47596	-0.984512	-0.0428391	3.43265	1.21595	0.595444	1.63776	2.3351	6.13519	0.56831	2.9628	1.13322		8.61924	3.40797	2.21309	3.56227	3.04066	2.00486	1.06765	0.433079	2.41146	4.41261	4.33906	3.3582	3.31674	3.25124	3.03154	3.70814	3.83502
	8.62947	-1.82831	1.2774	2.4216	0.92247	1.13848	4.8122	1.90791	2.23988	4.00237	2.27559	0.114815	-0.507301	3.71024	2.3078	3.80756	2.35693	2.16742	1.86728	0.433601	-0.957542	-0.0221939	3.43632	1.3	0.5765	1.50752	2.33652	5.9805	0.369705	2.88222	1.15863		8.62947	3.32396	2.12127	3.53341	2.83889	2.04039	1.07368	0.446339	2.47847	4.36607	4.20759	3.30505	3.25019	3.00781	2.98452	3.61473	3.60053
	8.63972	-1.82515	1.17778	2.58678	0.978821	1.16667	4.91389	2.02419	2.18356	4.1498	2.31367	0.0839157	-0.565468	3.6163	2.40418	3.80234	2.40065	2.09222	1.76963	0.330357	-0.887451	0.0447083	3.45942	1.37295	0.593594	1.22425	2.25084	5.72857	0.216072	2.75486	1.12765		8.63972	3.17731	1.98764	3.61293	2.68599	2.1439	1.09562	0.459499	2.46187	4.39828	4.03071	3.16595	3.11242	2.8011	2.93587	3.49195	3.41404
	8.64995	-1.83405	1.19279	2.81683	0.971775	1.26812	4.93343	2.03539	2.18374	4.30748	2.39721	-0.000663757	-0.57164	3.43566	2.55351	3.72765	2.46647	2.12986	1.61531	0.239243	-0.827347	0.0605392	3.50353	1.39773	0.663986	1.00621	2.14148	5.49573	0.146355	2.65536	1.03577		8.64995	3.00541	1.83447	3.6236	2.58228	2.15744	1.104	0.455349	2.54766	4.43183	3.96132	3.06154	3.08967	2.56927	2.73493	3.26355	3.15688
	8.6602	-1.70071	1.1904	3.08475	0.943878	1.31656	4.88742	2.08517	2.20062	4.38409	2.34695	-0.107594	-0.645943	3.38255	2.60568	3.71646	2.50559	1.89816	1.51286	0.191643	-0.760338	0.0504532	3.57809	1.4124	0.817314	0.911358	2.07242	5.39601	-0.00445557	2.66016	0.971977		8.6602	2.85003	1.69822	3.67741	2.46806	2.18045	1.05256	0.431911	2.59921	4.44354	4.04475	2.99717	2.95589	2.32006	2.57768	3.23642	2.95391
	8.67043	-1.55407	1.2651	3.30268	0.884655	1.26031	4.81629	2.08689	2.158	4.61557	2.43201	-0.28183	-0.690491	3.3781	2.60779	3.63997	2.5134	1.74405	1.53111	0.191692	-0.81118	-0.0201187	3.64224	1.42908	0.8297	0.849621	2.02979	5.24201	-0.0380478	2.63801	0.974884		8.67043	2.77265	1.62964	3.69519	2.25173	2.23643	0.965385	0.414852	2.66138	4.45119	4.0786	2.93708	2.93202	2.06252	2.54873	2.75959	2.74684
	8.68067	-1.42162	1.21992	3.53543	0.770786	1.26734	4.84288	2.02698	2.02257	4.68002	2.44805	-0.345154	-0.605354	3.32198	2.62114	3.59961	2.45774	1.68395	1.44736	0.0502014	-0.720795	-0.151249	3.5295	1.44117	0.969643	0.748043	1.9622	5.13026	-0.218712	2.61408	0.989429		8.68067	2.72126	1.56993	3.71929	2.05106	2.43524	0.979584	0.333256	2.6571	4.4439	3.92061	2.92745	2.9035	1.84181	2.31914	2.36692	2.55161
	8.69092	-1.369	1.18317	3.60344	0.594334	1.34488	4.81489	2.12542	1.96613	4.87833	2.52695	-0.307793	-0.541435	3.30887	2.58987	3.59522	2.46103	1.60847	1.3477	-0.00389481	-0.678368	-0.341362	3.10255	1.52771	1.06368	0.580658	1.83012	5.05541	-0.374813	2.61276	0.971584		8.69092	2.59364	1.5312	3.68134	1.96435	2.37756	0.997025	0.333267	2.70119	4.41658	3.69847	2.82788	2.8372	1.66661	2.08201	2.36414	2.38808
	8.70115	-1.28096	1.19069	3.6112	0.609497	1.49621	4.73818	2.07345	1.92135	5.03838	2.53789	-0.220833	-0.605854	3.16506	2.68391	3.57895	2.5248	1.53286	1.33734	-0.0923691	-0.607952	-0.497517	3.00108	1.58073	1.19974	0.411369	1.72652	5.01286	-0.550636	2.59564	0.9524		8.70115	2.56125	1.47058	3.73985	1.81403	2.3166	0.945202	0.339466	2.68473	4.33469	3.65294	2.73791	2.75001	1.50838	1.94026	2.40345	2.18135
	8.7114	-1.16347	1.05637	3.54092	0.55423	1.6354	4.64987	1.99445	1.96738	5.12351	2.59027	-0.394424	-0.568279	3.14305	2.6627	3.5817	2.4447	1.3819	1.32738	-0.0961266	-0.553402	-0.54258	3.14993	1.57757	1.26628	0.135567	1.56945	4.85657	-0.569077	2.60794	0.942543		8.7114	2.5284	1.54705	3.70545	1.6441	2.26733	0.907356	0.417522	2.70419	4.19244	3.71619	2.66444	2.69184	1.2294	1.85041	2.44075	1.93596
	8.72163	-1.06989	0.987579	3.6708	0.58065	1.7314	4.57095	1.90368	1.97002	5.20468	2.54898	-0.499744	-0.511059	3.09279	2.66146	3.49373	2.44695	1.15454	1.31973	-0.112064	-0.567123	-0.558815	3.38459	1.59979	1.40063	-0.0269394	1.49383	4.60076	-0.489433	2.61505	0.997009		8.72163	2.44056	1.46656	3.7452	1.50754	2.37278	0.845081	0.482433	2.70953	4.05292	3.74499	2.65421	2.69135	0.878864	1.77178	2.43304	1.80465
	8.73188	-0.876995	1.00605	3.83927	0.493553	1.65488	4.42974	1.85211	1.94737	5.33685	2.65557	-0.429363	-0.548752	3.07941	2.67128	3.49143	2.41259	1.11108	1.29971	-0.152988	-0.440594	-0.598091	3.68811	1.66155	1.57284	-0.0367012	1.42517	4.4009	-0.494705	2.68839	1.02801		8.73188	2.32392	1.4072	3.70811	1.3725	2.47413	0.843472	0.531025	2.73332	3.8737	3.71566	2.74925	2.65462	0.672832	1.64263	2.48267	1.60078
	8.74212	-0.691196	1.11752	3.99343	0.374092	1.61635	4.26227	1.80653	1.92966	5.39747	2.70782	-0.369377	-0.66362	3.04219	2.62549	3.49219	2.34061	1.06548	1.29968	-0.0827026	-0.374481	-0.727818	3.7952	1.60838	1.627	-0.0144081	1.51781	4.25623	-0.564392	2.58253	0.905281		8.74212	2.17596	1.41047	3.64626	1.29026	2.51437	0.965603	0.464397	2.67901	3.70071	3.62757	2.6643	2.56462	0.545887	1.44926	2.50406	1.5295
	8.75236	-0.553425	1.21968	4.06031	0.332214	1.64877	4.30476	1.74345	2.01005	5.45267	2.85645	-0.389236	-0.61924	2.932	2.59893	3.41955	2.29669	0.975754	1.22761	-0.231823	-0.364037	-0.905853	3.83641	1.4906	1.71692	-0.112755	1.50291	4.0492	-0.666115	2.61336	0.899437		8.75236	2.13108	1.31004	3.68229	1.32527	2.62994	0.998135	0.501019	2.68045	3.51563	3.59234	2.61391	2.42323	0.426941	1.27007	2.52901	1.25678
	8.7626	-0.410004	1.29343	4.17283	0.300743	1.61029	4.47735	1.62237	2.03157	5.52547	3.08931	-0.428062	-0.541946	2.96111	2.63089	3.45304	2.20008	0.895538	1.12263	-0.376675	-0.446102	-1.0017	3.86311	1.41002	1.88389	-0.251266	1.35799	3.85312	-0.754734	2.5789	0.864487		8.7626	2.21279	1.20154	3.69666	1.20681	2.64286	1.00456	0.506657	2.62333	3.33453	3.41393	2.52086	2.34132	0.244137	1.15679	2.40836	1.1229
	8.77284	-0.310726	1.28608	4.22979	0.19825	1.70885	4.56762	1.49741	2.03417	5.63115	3.10045	-0.440701	-0.464378	2.80587	2.62263	3.54667	2.10509	0.78978	0.915924	-0.438423	-0.404259	-1.10302	3.97077	1.46773	2.01214	-0.438354	1.17729	3.71478	-0.744659	2.60294	0.84446		8.77284	2.30095	1.13588	3.67213	1.04187	2.53065	0.95499	0.508221	2.62531	3.16372	2.98241	2.51659	2.3137	-0.00207901	1.01524	2.30722	1.04248
	8.78308	-0.123486	1.36803	4.31242	0.0985565	1.78389	4.60711	1.53925	2.20393	5.69962	3.22608	-0.452301	-0.442047	2.79967	2.55645	3.44928	2.06154	0.817146	0.861256	-0.529549	-0.278385	-1.1652	4.09339	1.50917	1.97145	-0.533016	0.991966	3.5182	-0.725494	2.69193	0.830105		8.78308	2.28519	1.14712	3.56819	0.829044	2.5849	0.986416	0.560707	2.64225	3.07453	2.88659	2.49249	2.29184	-0.224491	0.982613	2.16852	0.910587
	8.79331	0.0544205	1.43223	4.39347	0.0493469	1.77596	4.59067	1.60803	2.25225	5.67315	3.331	-0.654408	-0.320599	2.69975	2.48861	3.35216	1.9538	0.732784	0.911392	-0.397224	-0.320679	-1.21957	4.21912	1.47675	1.98176	-0.547192	0.892128	3.34782	-0.81522	2.75407	0.898712		8.79331	2.22495	1.0013	3.63746	0.680023	2.53767	0.927921	0.603802	2.67343	3.08489	2.89806	2.59705	2.2863	-0.372154	0.963131	2.01345	0.790531
	8.80356	0.235619	1.52126	4.39134	-0.0832634	1.72678	4.50658	1.5465	2.28875	5.6024	3.26577	-0.673256	-0.181099	2.57316	2.52405	3.30573	1.91996	0.573723	0.966217	-0.275536	-0.249847	-1.23247	4.33729	1.53909	1.94044	-0.620182	0.714249	3.17961	-0.914116	2.6174	0.974419		8.80356	2.121	0.983044	3.55273	0.669117	2.50494	0.851887	0.651783	2.76316	2.97075	2.90721	2.55559	2.14968	-0.553898	0.989346	2.01213	0.727566
	8.8138	0.305073	1.6397	4.45172	-0.10397	1.78008	4.33521	1.4738	2.33419	5.53154	3.34226	-0.641388	-0.183113	2.54395	2.59142	3.27893	1.91512	0.448921	1.02499	-0.220047	-0.209946	-1.25497	4.32635	1.59966	1.93248	-0.745316	0.67157	3.00069	-0.894699	2.5219	1.01812		8.8138	2.02359	0.970654	3.45886	0.407711	2.41759	0.82106	0.683731	2.72822	2.7842	2.9748	2.56658	2.15659	-0.664013	0.850994	2.15818	0.636036
	8.82404	0.295822	1.78328	4.37117	-0.0225143	1.77836	4.22749	1.45717	2.385	5.45183	3.42794	-0.598175	0.0325356	2.51765	2.5289	3.14051	1.87597	0.327995	1.1302	-0.192448	-0.231705	-1.25364	4.32785	1.54152	1.96579	-0.877113	0.588444	2.77473	-0.956375	2.62472	1.00079		8.82404	1.89948	0.995747	3.36847	0.223141	2.48304	0.772266	0.627213	2.82237	2.66793	2.92868	2.58372	2.14812	-0.771111	0.78302	2.19609	0.533504
	8.83428	0.406891	1.88021	4.32271	0.0351715	1.79446	4.11718	1.39348	2.44809	5.42256	3.59386	-0.677189	0.203114	2.46323	2.46581	3.02509	1.92254	0.206261	0.964382	-0.152191	-0.230415	-1.15976	4.3921	1.40501	2.04463	-0.94994	0.505093	2.62152	-0.94783	2.8028	1.04739		8.83428	1.84757	0.879627	3.34085	0.103909	2.51804	0.626427	0.651138	2.85839	2.55342	2.88295	2.54634	1.97622	-0.891094	0.722557	2.1161	0.442261
	8.84452	0.435844	2.00665	4.25781	-0.0742989	1.74651	4.02258	1.33944	2.60083	5.34295	3.60439	-0.607071	0.406937	2.29754	2.49042	2.8792	2.06901	0.273911	0.82896	-0.071846	-0.159664	-1.22219	4.47598	1.24155	2.14544	-0.991413	0.370567	2.33271	-1.00076	2.85141	1.07868		8.84452	1.88192	0.839527	3.27702	-0.00439072	2.5016	0.484173	0.614529	2.75333	2.46729	2.75645	2.53074	1.84472	-1.00358	0.651745	1.95834	0.400322
	8.85476	0.499825	2.14381	4.29536	-0.0743256	1.75549	3.89503	1.28654	2.72633	5.34645	3.65501	-0.622032	0.4646	2.24506	2.46774	2.73459	2.13467	0.365452	0.845627	-0.117432	-0.00876999	-1.1991	4.57639	1.08735	2.16874	-1.06272	0.150146	2.06789	-0.94833	2.90813	1.02804		8.85476	1.96525	0.882774	3.23393	-0.0975685	2.49981	0.385315	0.604218	2.63106	2.33032	2.67471	2.61839	1.77457	-0.988918	0.532917	2.01897	0.279026
	8.865	0.463249	2.28997	4.3921	-0.134224	1.8317	3.88124	1.24548	2.75901	5.27024	3.7064	-0.627037	0.647705	2.15465	2.49239	2.61018	2.03662	0.389809	0.809807	-0.193665	0.0399399	-1.25485	4.66082	1.08197	2.08366	-1.0496	0.103134	1.80933	-0.906452	2.95738	1.17059		8.865	2.02535	0.92675	3.32031	-0.337978	2.43942	0.464336	0.549702	2.50102	2.16285	2.63078	2.67234	1.77724	-0.920315	0.479156	1.94822	-0.0269127
	8.87524	0.439266	2.36237	4.42332	-0.134869	1.81068	3.92831	1.12758	2.86803	5.17204	3.81304	-0.720352	0.902657	2.01207	2.49133	2.42157	1.88897	0.318924	0.736107	-0.323135	0.009552	-1.2732	4.66353	1.0387	2.12096	-1.09171	0.0511932	1.70188	-0.89893	2.90854	1.28212		8.87524	1.99447	0.707714	3.24994	-0.54446	2.30352	0.463562	0.614635	2.45527	2.33542	2.5117	2.75783	1.80214	-0.84515	0.519413	1.92965	-0.142426
	8.88548	0.37413	2.57774	4.54716	-0.206276	1.80169	3.99689	0.986401	2.95133	5.1773	3.8273	-0.77457	0.972595	1.86312	2.53926	2.29419	1.69545	-0.206612	0.754265	-0.283321	-0.0796051	-1.2692	4.70783	1.01453	2.17984	-1.1292	-0.137062	1.60044	-0.964577	2.90813	1.31121		8.88548	2.09444	0.515575	3.23766	-0.646072	2.33328	0.436039	0.585407	2.38822	2.33999	2.31849	2.76521	1.67714	-0.778774	0.517529	1.99577	-0.256474
	8.89572	0.399055	2.75846	4.52879	-0.215027	1.73019	3.99651	1.03228	3.02563	5.24452	3.7322	-0.783154	1.11172	1.77322	2.51244	2.2513	1.65723	-0.427017	0.686054	-0.284454	-0.113007	-1.29874	4.75464	0.833515	2.27031	-1.17764	-0.349457	1.48145	-1.01662	2.93379	1.29197		8.89572	2.10908	0.365288	3.1765	-0.761608	2.36386	0.412006	0.423328	2.33072	2.27882	2.0958	2.75269	1.62439	-0.756916	0.535709	2.04235	-0.296623
	8.90596	0.582664	2.86733	4.5134	-0.198517	1.69741	4.00378	0.942627	3.1768	5.16235	3.66309	-0.775715	1.27203	1.65678	2.49834	2.10903	1.67214	-0.234241	0.593273	-0.337502	-0.0960426	-1.30815	4.70776	0.657417	2.30032	-1.19114	-0.503048	1.45092	-0.989876	3.00498	1.37601		8.90596	2.00537	0.269085	3.01374	-0.779205	2.19998	0.382286	0.373264	2.17478	2.22942	2.0315	2.68424	1.67561	-0.8354	0.459927	2.00238	-0.501423
	8.9162	0.579422	2.95047	4.51211	-0.189121	1.65097	3.90221	0.867203	3.31276	5.04678	3.69334	-0.658951	1.46751	1.66063	2.46616	2.02341	1.74417	-0.109619	0.557892	-0.282356	0.0879669	-1.26915	4.67288	0.579994	2.33823	-1.23784	-0.518639	1.29955	-0.998135	3.18516	1.46456		8.9162	1.9124	0.229328	2.9196	-0.893814	2.1162	0.338989	0.457317	2.1033	2.20589	1.9494	2.7603	1.76659	-0.773354	0.536316	1.87286	-0.564999
	8.92644	0.499954	3.12222	4.39724	-0.113495	1.70073	3.77375	0.892536	3.39713	5.06419	3.69081	-0.617844	1.64227	1.63826	2.41368	1.82226	1.74473	-0.0914993	0.697426	-0.261444	0.126343	-1.1928	4.68712	0.569073	2.1725	-1.14505	-0.610657	1.24905	-0.935337	3.34466	1.57575		8.92644	1.89077	0.17033	2.78176	-0.929531	1.99306	0.194031	0.390438	2.08825	2.06093	1.89584	2.81265	1.77788	-0.693733	0.477428	1.77302	-0.583202
	8.93668	0.419655	3.33575	4.24822	0.0037117	1.71848	3.67996	0.92347	3.45414	4.90343	3.65982	-0.599358	1.73949	1.46493	2.38492	1.66729	1.80612	-0.144051	0.811867	-0.212547	0.198631	-1.04978	4.71125	0.486973	2.19004	-1.19376	-0.658829	1.1779	-0.803505	3.38433	1.64207		8.93668	1.92822	0.119892	2.56184	-0.989635	1.93996	0.247532	0.293571	1.94927	1.87144	1.77477	2.82779	1.76141	-0.692089	0.496403	1.68919	-0.691383
	8.94692	0.405197	3.48999	4.14145	0.263077	1.76105	3.63875	0.929955	3.52991	4.66941	3.66407	-0.582382	1.82875	1.35667	2.31585	1.52205	1.8952	-0.193615	0.879185	-0.148628	0.347488	-1.04848	4.85375	0.445419	2.21273	-1.24709	-0.753723	1.13956	-0.629089	3.3606	1.72413		8.94692	1.87912	0.0775986	2.34306	-0.985653	1.85825	0.169559	0.232082	1.80054	1.75596	1.60683	2.85881	1.72298	-0.681274	0.578945	1.80104	-0.723202
	8.95716	0.44265	3.75004	4.18642	0.303665	1.70443	3.60549	0.868526	3.72111	4.56665	3.7043	-0.64901	1.96212	1.22057	2.28493	1.49242	1.95349	-0.124249	0.806408	-0.165733	0.449066	-1.17449	4.95141	0.423935	2.19866	-1.19524	-0.732742	1.00634	-0.60968	3.22121	1.87533		8.95716	1.86399	0.0824013	2.12184	-1.04235	1.66306	0.174946	0.250286	1.63551	1.71814	1.41699	2.89244	1.67593	-0.715393	0.670544	1.91703	-0.894791
	8.9674	0.491661	3.92398	4.24801	0.470047	1.60065	3.52927	0.862007	3.84262	4.45946	3.71053	-0.520893	2.0497	1.17169	2.23594	1.44218	1.99635	-0.0835876	0.807732	-0.113102	0.376873	-1.28931	4.98854	0.372913	2.11497	-1.04745	-0.808472	0.784744	-0.574989	3.30714	2.04075		8.9674	1.80013	0.0478554	2.01728	-1.1264	1.65865	0.141781	0.304466	1.5089	1.57871	1.32615	2.98893	1.63942	-0.707573	0.766045	1.95956	-0.889965
	8.97764	0.561504	4.09592	4.19921	0.654259	1.55554	3.42392	0.924652	4.0284	4.35856	3.72718	-0.404022	2.11866	1.1215	2.12679	1.29123	2.00781	-0.111099	0.774982	-0.145775	0.306442	-1.31312	4.95395	0.298611	2.02141	-0.947639	-1.04366	0.730576	-0.353355	3.32029	2.13027		8.97764	1.78316	0.030262	1.87092	-1.13847	1.57806	0.118702	0.26054	1.34475	1.44475	1.22885	3.03617	1.66207	-0.633892	0.696758	1.99973	-0.961597
	8.98788	0.56868	4.22135	4.20924	0.793175	1.48547	3.31567	0.94463	4.15749	4.15059	3.70275	-0.339729	2.16692	1.16621	2.00645	1.13194	2.05219	-0.0869942	0.740997	-0.141308	0.34446	-1.31472	4.92421	0.170258	1.94326	-0.990135	-1.14877	0.721306	-0.177818	3.20492	2.20515		8.98788	1.75486	-0.0816154	1.79288	-1.06329	1.33807	0.100071	0.279682	1.19808	1.47729	1.13	3.13435	1.54625	-0.702782	0.705189	2.04152	-0.974327
	8.99812	0.58326	4.4403	4.13383	0.976292	1.3775	3.21275	0.947647	4.25178	4.08106	3.58878	-0.262291	2.17531	1.14184	1.93497	1.01029	2.12932	-0.0768509	0.757462	-0.116676	0.377468	-1.21157	4.89399	-0.0118103	1.78919	-0.947208	-1.20208	0.664085	-0.0141945	3.16365	2.25524		8.99812	1.64199	-0.174206	1.85762	-0.993675	1.26662	0.115257	0.321083	1.06415	1.41713	0.865177	3.1395	1.54354	-0.731594	0.779182	2.02552	-0.874954
	9.00836	0.641445	4.6658	4.07282	1.18066	1.39066	3.13437	1.00525	4.37223	3.89486	3.45522	-0.121651	2.35459	1.10885	1.92305	0.925011	2.12122	0.0156555	0.762825	-0.102386	0.499241	-1.05399	4.89861	-0.081131	1.70012	-0.993557	-1.27738	0.659027	0.202183	3.12086	2.26944		9.00836	1.64701	-0.105232	1.70421	-0.938351	1.28042	0.075634	0.324791	1.03511	1.32515	0.631336	3.18266	1.47551	-0.693756	0.839668	1.8751	-0.900513
	9.0186	0.726013	4.85942	4.03282	1.49873	1.35583	3.01817	1.01073	4.48486	3.7797	3.32538	0.0693741	2.49025	1.08185	1.92578	0.745071	2.18424	0.0406799	0.783279	0.0363846	0.561813	-0.904518	4.99715	-0.0791283	1.61879	-0.873085	-1.38892	0.685387	0.452293	3.06719	2.28135		9.0186	1.65963	-0.0881729	1.59542	-0.991863	1.27182	0.124722	0.336926	1.04615	1.21719	0.539211	3.18692	1.39577	-0.604313	0.955753	1.91117	-0.877758
	9.02884	0.782612	4.95922	3.94156	1.71794	1.27001	2.89585	1.05678	4.68839	3.57663	3.24614	0.350327	2.64661	1.06295	1.86527	0.636139	2.17582	-0.0358047	0.776463	0.22377	0.678482	-0.697491	5.0985	-0.15995	1.58572	-0.801823	-1.42397	0.603466	0.614311	3.07715	2.20713		9.02884	1.60176	-0.155453	1.50939	-1.06097	1.21204	0.0103874	0.203377	0.94611	1.18244	0.489239	3.10955	1.3522	-0.51759	1.08709	1.9463	-0.811558
	9.03908	0.918034	5.06162	3.88571	1.94779	1.15203	2.80372	0.969486	4.75681	3.56546	3.1702	0.627953	2.84682	1.07277	1.91465	0.541309	2.18726	0.0309525	0.632492	0.350277	0.704662	-0.583397	5.18775	-0.12307	1.52413	-0.667973	-1.54681	0.596573	0.695877	3.18181	2.27219		9.03908	1.5608	-0.26099	1.39212	-1.03275	1.09124	-0.0456047	0.219673	0.777203	1.21351	0.37965	3.16705	1.35561	-0.434082	1.167	2.05383	-0.75938
	9.04932	0.986053	5.18532	3.9255	2.15284	1.06318	2.67014	0.871986	4.83246	3.60456	3.02765	0.802757	2.91695	1.05676	2.10847	0.442924	2.22543	0.0474396	0.560467	0.407581	0.667946	-0.560543	5.23583	-0.0175209	1.5004	-0.61277	-1.68674	0.563839	0.992577	3.2463	2.19354		9.04932	1.5724	-0.315197	1.30368	-0.94128	1.05596	-0.0370445	0.32671	0.619846	1.22742	0.249012	3.27728	1.31433	-0.493019	1.19481	2.08794	-0.786785
	9.05956	1.03722	5.44091	3.85478	2.34515	0.99955	2.70722	0.820641	4.87196	3.46129	2.89628	0.884811	2.95547	0.975555	2.15301	0.284782	2.26086	0.118782	0.514534	0.55175	0.835697	-0.456772	5.34773	0.0892906	1.52365	-0.505825	-1.81961	0.481251	1.3969	3.15781	2.17981		9.05956	1.56196	-0.399143	1.36309	-0.781841	0.97826	-0.00976944	0.358932	0.428196	1.16841	0.133343	3.26015	1.37146	-0.560184	1.21677	2.159	-0.723583
	9.0698	1.0626	5.75098	3.95565	2.65099	0.921326	2.75706	0.813248	4.9854	3.17516	2.88748	0.928429	3.04655	0.937752	2.29571	0.261299	2.29514	0.0740929	0.52343	0.807789	1.00186	-0.222931	5.43576	0.10096	1.59241	-0.435276	-1.8577	0.43824	1.72657	3.07012	2.2224		9.0698	1.46599	-0.444645	1.38596	-0.785641	0.917477	-0.0755119	0.199276	0.312691	1.13993	-0.0566902	3.17266	1.35212	-0.571712	1.20416	2.20407	-0.716213
	9.08004	1.1498	5.96774	4.01494	2.92477	0.807335	2.72417	0.847809	5.03621	3.01708	2.75272	1.1212	3.24493	0.906151	2.32977	0.233604	2.36547	0.140648	0.605682	0.874474	1.18546	-0.0335655	5.39155	0.221649	1.64943	-0.340637	-1.96233	0.375572	1.98936	2.9982	2.23041		9.08004	1.4392	-0.584	1.29152	-0.796539	0.826366	-0.1105	0.0564537	0.308853	1.07479	-0.178234	3.22919	1.34869	-0.518116	1.18579	2.24561	-0.724155
	9.09028	1.26838	6.09137	4.05118	3.17545	0.748962	2.63692	0.942318	5.21813	2.88176	2.69847	1.37618	3.42205	1.03064	2.36848	0.231831	2.34872	0.295204	0.598637	0.965099	1.3817	0.0551033	5.44399	0.197067	1.66183	-0.196526	-1.97316	0.340393	2.27053	3.03185	2.22559		9.09028	1.44307	-0.622673	1.23893	-0.798576	0.877483	-0.152973	0.0473442	0.2024	0.990158	-0.167339	3.21068	1.37844	-0.416073	1.24904	2.26281	-0.767391
	9.10052	1.40431	6.25073	4.04565	3.4659	0.714165	2.62665	1.14379	5.43075	2.90446	2.58512	1.6473	3.43432	1.26493	2.49217	0.319221	2.3429	0.3405	0.648277	1.09296	1.45193	0.197975	5.4743	0.0739861	1.67549	-0.0594559	-2.04498	0.359241	2.51457	3.13194	2.34953		9.10052	1.3539	-0.507183	1.17439	-0.726589	0.872284	-0.137623	-0.141605	0.0392876	0.981228	-0.215382	3.2447	1.25403	-0.294323	1.31824	2.25387	-0.694462
	9.11076	1.60796	6.42242	4.18175	3.58945	0.65464	2.55338	1.18705	5.62628	2.93786	2.39767	1.93378	3.54221	1.42113	2.61088	0.373985	2.34934	0.336876	0.645557	1.24767	1.54847	0.3382	5.53255	0.00142288	1.64615	0.00167084	-2.08858	0.368919	2.97321	3.15159	2.39397		9.11076	1.20098	-0.402683	1.18807	-0.718769	0.924023	-0.0978165	-0.226978	-0.240868	0.913651	-0.313206	3.23214	1.17179	-0.271755	1.38622	2.23623	-0.516827
	9.121	1.75261	6.50896	4.25946	3.68574	0.537579	2.54268	1.14519	5.71829	2.90831	2.25029	2.20021	3.57944	1.49768	2.69252	0.36599	2.50718	0.416702	0.663261	1.4149	1.62753	0.505699	5.48396	0.0806122	1.64062	0.13018	-2.12391	0.498394	3.37074	3.11866	2.51387		9.121	1.11442	-0.485416	1.14639	-0.694389	1.03626	0.0228004	-0.321407	-0.524242	0.966866	-0.527103	3.17156	1.09659	-0.18	1.4501	2.15545	-0.265987
	9.13124	1.8504	6.57378	4.3185	3.98932	0.480141	2.70974	1.20715	5.77584	2.79356	2.14945	2.39921	3.62419	1.57021	2.81878	0.33831	2.6334	0.364986	0.759678	1.57469	1.80664	0.723412	5.38866	0.275223	1.54753	0.316422	-2.21185	0.522118	3.61355	3.14122	2.4649		9.13124	1.0326	-0.674839	1.19447	-0.71841	1.08477	0.0713043	-0.30027	-0.610882	0.990124	-0.584538	3.03905	1.03429	-0.301666	1.45645	2.12043	-0.118179
	9.14148	2.02087	6.54438	4.35852	4.33603	0.519398	2.74749	1.34626	5.73653	2.64919	2.10563	2.6177	3.82884	1.76574	2.97261	0.359001	2.76015	0.339714	0.904625	1.72825	2.00831	0.918129	5.41388	0.367119	1.43757	0.477425	-2.21446	0.498047	3.81736	3.21302	2.44437		9.14148	1.03719	-0.831528	1.2549	-0.706333	1.16989	0.158386	-0.303596	-0.740604	0.877613	-0.555927	2.98937	0.94566	-0.390903	1.44864	2.08506	-0.147015
	9.15172	2.12683	6.6791	4.36784	4.66912	0.437645	2.796	1.41337	5.73732	2.58718	2.0068	2.8788	4.05524	1.79902	3.14026	0.538033	2.80706	0.453056	1.01337	1.8587	2.12408	1.18777	5.40072	0.377766	1.43004	0.529556	-2.21765	0.53437	4.09619	3.29068	2.33442		9.15172	0.981922	-0.864643	1.13002	-0.665993	1.15375	0.330074	-0.300022	-0.830692	0.68726	-0.56469	3.07744	0.958553	-0.369816	1.4796	2.06675	-0.137119
	9.16196	2.31753	6.8065	4.53544	4.8728	0.309067	2.92937	1.53028	5.81087	2.55537	1.94383	3.09132	4.14819	1.96276	3.22227	0.733368	2.82121	0.566536	1.0549	1.94809	2.25752	1.44588	5.4436	0.317768	1.54995	0.733677	-2.23258	0.467171	4.38518	3.2861	2.33937		9.16196	0.915688	-0.908501	1.01221	-0.676125	1.06577	0.374752	-0.240116	-0.940975	0.554615	-0.634628	3.08162	0.924702	-0.335796	1.37136	2.0552	-0.0130501
	9.1722	2.44238	6.88016	4.78707	5.2144	0.171642	3.0149	1.6985	5.85759	2.49528	1.89902	3.39071	4.35781	2.04727	3.4344	0.731438	2.91499	0.688007	1.13978	2.13602	2.33692	1.74632	5.41878	0.319176	1.56781	0.785736	-2.27159	0.446239	4.51248	3.40007	2.44507		9.1722	0.808006	-0.875633	0.964565	-0.624031	0.966782	0.466805	-0.126881	-1.15084	0.536114	-0.691242	3.04855	0.986259	-0.348385	1.32378	1.989	0.113529
	9.18244	2.60877	6.93138	4.76985	5.53723	0.0169067	3.03662	1.86216	5.75295	2.37422	1.77075	3.65253	4.57731	2.19003	3.65025	0.658554	3.0325	0.747471	1.30594	2.3274	2.53603	2.01226	5.40759	0.346783	1.55279	0.947731	-2.35338	0.406067	4.68761	3.45096	2.55106		9.18244	0.84074	-0.935658	1.00746	-0.523479	1.0634	0.343136	-0.156181	-1.3107	0.497814	-0.658222	3.02372	0.979725	-0.353115	1.15452	2.00694	0.16201
	9.19268	2.68338	6.83538	4.76781	5.85989	-0.171574	3.13597	2.05224	5.70565	2.36941	1.59732	3.83047	4.82035	2.3526	3.87626	0.69651	3.0755	0.819103	1.44463	2.44943	2.69665	2.29261	5.41946	0.464012	1.74361	1.08945	-2.40836	0.463657	4.89934	3.46582	2.6543		9.19268	0.771038	-1.08773	0.915829	-0.407406	1.14894	0.373287	-0.0948486	-1.4216	0.517529	-0.696285	3.13461	0.909527	-0.305515	1.10753	1.99104	0.110249
	9.20292	2.83226	6.83291	4.74932	6.17451	-0.15517	3.23403	2.18363	5.79617	2.3991	1.47907	4.0731	4.88822	2.59579	3.96692	0.848083	3.1362	0.867218	1.48732	2.59327	2.83904	2.47955	5.29203	0.523964	1.82171	1.18733	-2.52796	0.481907	5.14468	3.41702	2.67808		9.20292	0.659508	-1.12911	0.872807	-0.231045	1.18988	0.422398	-0.195225	-1.72017	0.569073	-0.744144	3.18958	0.68951	-0.304169	1.05865	1.87171	0.130051
	9.21316	2.93148	6.85046	4.88878	6.45904	-0.10038	3.42934	2.25547	5.76749	2.43185	1.54673	4.23376	4.98654	2.67591	4.01289	0.935211	3.248	1.09786	1.52996	2.73058	3.07882	2.63516	5.36962	0.600842	1.87136	1.40551	-2.48734	0.488583	5.4048	3.36705	2.67957		9.21316	0.546043	-1.15899	0.909309	-0.197498	1.24479	0.414413	-0.367931	-1.89307	0.546532	-0.514797	3.04485	0.596149	-0.275391	0.96677	1.72081	0.156361
	9.2234	3.08784	6.86243	4.91783	6.71435	-0.216396	3.65078	2.36956	5.7494	2.52662	1.50214	4.32438	5.12797	2.85621	4.07945	0.943008	3.33689	1.28931	1.56885	2.84784	3.23748	2.75496	5.37395	0.721947	1.98277	1.49342	-2.41403	0.50531	5.57129	3.32003	2.64594		9.2234	0.419765	-1.19665	0.945408	-0.157982	1.20312	0.365726	-0.424999	-1.98247	0.472004	-0.358551	2.9459	0.620205	-0.167469	0.893658	1.5325	0.141521
	9.23364	3.21329	6.7324	4.9161	6.95753	-0.297256	3.8504	2.58231	5.70307	2.52972	1.4139	4.42195	5.27855	3.14237	4.16064	1.05019	3.34536	1.41846	1.6843	2.93512	3.40748	2.95866	5.33935	0.842884	2.01369	1.68512	-2.41609	0.512093	5.7778	3.34561	2.67675		9.23364	0.35146	-1.22683	0.873188	-0.0954094	1.2083	0.271957	-0.361496	-2.00761	0.468498	-0.199623	2.85259	0.589138	-0.0608635	0.872509	1.43032	0.170475
	9.24388	3.33868	6.63855	4.92902	7.19761	-0.407837	3.98246	2.78353	5.75003	2.50294	1.29319	4.55773	5.35864	3.44098	4.22563	1.10036	3.37986	1.52839	1.9023	3.06875	3.50443	3.30267	5.25479	1.11412	1.97855	1.77642	-2.43864	0.510899	5.90629	3.46419	2.65498		9.24388	0.332172	-1.37236	0.82354	0.0431938	1.19522	0.227314	-0.370903	-1.93357	0.480267	-0.205502	2.77173	0.624138	-0.0341721	0.790043	1.31696	0.378735
	9.25412	3.51233	6.5825	4.97038	7.50789	-0.46669	4.08513	2.90321	5.65852	2.5317	1.31058	4.58091	5.46941	3.65172	4.24505	1.22441	3.42756	1.6369	2.06443	3.26729	3.59184	3.56973	5.29209	1.2459	2.02026	1.89067	-2.38791	0.352936	5.99589	3.57829	2.6198		9.25412	0.348301	-1.4353	0.829548	0.0256958	1.1116	0.356121	-0.426395	-1.86431	0.355595	-0.101871	2.72313	0.42345	0.0425377	0.804848	1.36086	0.59306
	9.26436	3.71739	6.56205	5.01724	7.84539	-0.488445	4.20943	3.06927	5.53754	2.5679	1.41346	4.678	5.51942	3.89658	4.37164	1.34815	3.49623	1.75209	2.10979	3.39317	3.70317	3.79655	5.3155	1.34181	2.0562	2.03417	-2.31486	0.292664	6.05177	3.71259	2.69251		9.26436	0.381821	-1.45024	0.755447	0.00941086	1.05648	0.426144	-0.493305	-1.99522	0.282818	0.024334	2.68231	0.379177	0.102203	0.762886	1.28841	0.714977
	9.2746	4.00107	6.45494	4.99047	8.34366	-0.484451	4.38498	3.32414	5.36328	2.70636	1.47853	4.70363	5.59633	4.18047	4.58455	1.43886	3.50335	1.9843	2.22206	3.4225	3.78892	4.06764	5.18315	1.52111	2.19468	2.21805	-2.21143	0.219872	6.03977	3.75224	2.71937		9.2746	0.489254	-1.56697	0.714714	0.00854111	1.04642	0.433727	-0.563557	-2.04232	0.204197	0.263626	2.63634	0.322277	0.11758	0.766224	1.14949	0.906101
	9.28484	3.81821	6.42887	5.02923	8.82067	-0.540871	4.62937	3.51042	5.20243	2.74977	1.40653	4.79828	5.66078	4.35895	4.77434	1.56351	3.52017	2.14317	2.41839	3.48331	3.88291	4.32021	4.97088	1.60743	2.24829	2.25133	-2.04638	0.197056	6.13356	3.71107	2.74001		9.28484	0.642483	-1.54542	0.709339	0.0672264	1.06971	0.397331	-0.575527	-2.13702	0.160389	0.526077	2.61645	0.231915	-0.0137138	0.732533	1.0527	1.02115
	9.29508	3.54591	6.34595	5.1193	9.03726	-0.490891	4.81095	3.63064	5.16549	2.87434	1.38139	4.95489	5.76974	4.5155	4.89148	1.62885	3.64776	2.27138	2.63647	3.59229	3.94763	4.52222	4.8824	1.74749	2.2977	2.31785	-1.98861	0.121788	6.20918	3.78988	2.76622		9.29508	0.700871	-1.63714	0.64735	0.162807	0.953419	0.370079	-0.559933	-2.15494	0.110275	0.725094	2.62508	-0.0300102	-0.0561905	0.65134	1.18027	1.05881
	9.30532	3.75219	6.28739	5.06213	9.2552	-0.440857	5.01607	3.83459	5.0949	2.94111	1.36208	5.27548	5.82297	4.70851	4.9684	1.66384	3.70361	2.49595	2.86506	3.63423	4.00719	4.67863	4.84722	1.88694	2.37537	2.32432	-1.90908	0.16927	6.23046	3.76766	2.81009		9.30532	0.813145	-1.70977	0.528221	0.142986	0.87344	0.340134	-0.57103	-2.1643	0.0125237	0.932461	2.51835	-0.148815	-0.198048	0.69495	1.2037	1.00473
	9.31556	4.04909	6.08695	5.06788	9.45493	-0.438744	5.25458	4.08111	5.09034	3.00384	1.33295	5.46123	5.83949	5.05331	5.05554	1.75534	3.74971	2.59842	3.07367	3.55641	4.07852	4.79842	4.8114	1.96214	2.38166	2.28901	-1.76851	0.235836	6.22234	3.71219	2.73948		9.31556	0.781292	-1.7593	0.322895	0.180191	0.74889	0.392765	-0.633892	-2.21309	-0.0672417	1.20137	2.37283	-0.126163	-0.164001	0.703831	1.0291	0.906319
	9.3258	4.22486	5.89428	5.1066	9.62394	-0.411961	5.47133	4.21263	4.95286	3.03723	1.38358	5.49654	5.89956	5.29652	5.12981	1.70827	3.75706	2.8057	3.16693	3.57205	4.18728	4.97115	4.75558	2.04016	2.41011	2.36901	-1.60893	0.343483	6.0664	3.7238	2.78283		9.3258	0.716785	-1.80471	0.329048	0.203449	0.708908	0.420719	-0.643105	-2.24332	-0.263638	1.49738	2.3461	-0.15839	-0.109753	0.730045	0.912064	0.988766
	9.33604	4.35627	5.8304	5.10898	9.91792	-0.292095	5.60027	4.37457	4.81063	3.09798	1.34019	5.58672	6.00154	5.53588	5.17978	1.67964	3.83215	3.00738	3.34552	3.58655	4.31954	5.08784	4.57399	2.16575	2.46685	2.52074	-1.40623	0.393978	5.96102	3.64874	2.80478		9.33604	0.702671	-1.69737	0.315479	0.357288	0.551525	0.420994	-0.596493	-2.28873	-0.379581	1.83907	2.43048	-0.309723	-0.0240021	0.765377	0.859646	1.12492
	9.34628	4.48513	5.65441	5.04819	10.2946	-0.187965	5.64709	4.48599	4.66785	3.26529	1.36066	5.69462	6.11004	5.82023	5.135	1.72627	3.89698	3.09486	3.464	3.66795	4.37416	5.11358	4.29645	2.29409	2.53798	2.52755	-1.21755	0.379589	5.81577	3.49477	2.87084		9.34628	0.71748	-1.68116	0.133484	0.410728	0.558071	0.372784	-0.522392	-2.33993	-0.548119	2.02883	2.46771	-0.331875	0.0827255	0.963024	0.653046	1.15466
	9.35652	4.59351	5.53757	5.07617	10.7383	-0.149185	5.78565	4.64551	4.42424	3.42633	1.36599	5.73155	6.29212	6.09205	5.15025	1.87961	4.04721	3.2345	3.65102	3.67303	4.50896	5.11564	4.05338	2.40182	2.62269	2.46632	-0.923668	0.312546	5.62029	3.49377	2.9079		9.35652	0.693302	-1.73214	0.020237	0.452679	0.568012	0.24913	-0.590282	-2.24997	-0.581165	2.17169	2.52964	-0.292591	0.137169	1.09826	0.548237	1.14947
	9.36676	4.67568	5.38712	5.04485	11.0598	-0.173492	5.96013	4.88217	4.2261	3.55553	1.51611	5.73793	6.30089	6.28452	5.12239	1.9455	4.1351	3.31541	3.90771	3.61927	4.56585	5.12063	3.92541	2.47883	2.57546	2.47572	-0.709457	0.222939	5.65043	3.49966	2.90714		9.36676	0.68198	-1.76321	-0.0978661	0.44809	0.543098	0.228519	-0.509399	-2.13625	-0.60553	2.39938	2.5589	-0.456722	0.148087	1.12303	0.546139	1.07188
	9.377	4.74753	5.18069	5.02949	11.4036	-0.184414	6.04731	5.01691	4.06831	3.81719	1.55119	5.74286	6.32353	6.34405	5.09153	1.97223	4.10879	3.43018	4.11952	3.58789	4.64003	5.25421	3.86412	2.66621	2.58604	2.38055	-0.603683	0.323242	5.60278	3.44022	3.00298		9.377	0.661987	-1.74334	-0.278778	0.383373	0.445896	0.383133	-0.509567	-2.1033	-0.718304	2.707	2.47235	-0.539726	0.206406	1.05008	0.603622	1.13172
	9.38724	4.87293	5.14655	5.09417	11.6986	-0.193233	6.07903	5.15076	4.01359	3.9958	1.61138	5.74143	6.37354	6.28573	5.07732	2.08529	4.2264	3.51334	4.26503	3.50077	4.70279	5.33088	3.79182	2.87391	2.60153	2.24268	-0.545605	0.309998	5.538	3.50505	3.08535		9.38724	0.670139	-1.63296	-0.452347	0.368851	0.445858	0.545315	-0.475842	-2.014	-0.872284	2.9475	2.49206	-0.553509	0.170712	0.991219	0.59145	1.20519
	9.39748	4.97097	4.99545	5.09055	12.0459	-0.296707	6.16439	5.35765	3.88747	4.10006	1.6926	5.84339	6.37436	6.33912	5.22155	2.20527	4.38879	3.77674	4.54238	3.37896	4.66365	5.34999	3.68548	3.08037	2.71856	2.1595	-0.356918	0.270119	5.42365	3.47253	3.23721		9.39748	0.723965	-1.55194	-0.517601	0.439472	0.437504	0.662045	-0.459118	-1.94755	-1.06477	3.13995	2.59456	-0.64867	0.175457	1.03226	0.497906	1.27333
	9.40772	4.93412	4.79749	5.00586	12.5125	-0.388092	6.28665	5.51752	3.7226	4.12585	1.66073	5.80399	6.31413	6.47496	5.20766	2.27328	4.50819	4.02007	4.71713	3.29399	4.81907	5.34584	3.53029	3.23679	2.79373	2.18489	-0.250381	0.183861	5.17761	3.33553	3.37173		9.40772	0.700207	-1.5568	-0.613575	0.535885	0.342506	0.732189	-0.485558	-1.986	-0.965088	3.28785	2.70042	-0.732166	0.270443	1.14412	0.301258	1.32824
	9.41796	4.9878	4.5626	4.83209	13.0469	-0.328957	6.3308	5.64943	3.53129	4.16068	1.74768	5.84927	6.24265	6.5146	5.20115	2.40474	4.62479	4.25309	4.8635	3.24751	4.96146	5.40803	3.26719	3.34253	2.80922	2.25772	-0.0550117	0.156132	5.00216	3.29224	3.48773		9.41796	0.793926	-1.49456	-0.782043	0.560135	0.27705	0.789471	-0.451916	-1.96852	-1.02351	3.41627	2.74922	-0.851994	0.325043	1.21127	0.206081	1.36439
	9.4282	5.01937	4.29221	4.69433	13.4315	-0.187286	6.3217	5.69966	3.43676	4.23854	1.82387	5.92694	6.25675	6.4802	5.1549	2.58906	4.74717	4.4253	4.98611	3.2036	5.11599	5.34171	3.10389	3.48521	2.79332	2.24374	0.0921173	0.101318	4.79379	3.1983	3.55164		9.4282	0.806099	-1.35038	-0.918659	0.598461	0.205532	0.841564	-0.436192	-1.75623	-1.11981	3.74845	2.7782	-0.921947	0.498241	1.25852	0.108391	1.5007
	9.43844	5.00362	4.13675	4.7452	13.6447	-0.142166	6.29286	5.77427	3.33857	4.35858	1.87072	5.9277	6.25295	6.52285	5.19158	2.74029	4.72603	4.73305	5.26585	3.19587	5.18611	5.24419	2.93519	3.55593	2.74594	2.29136	0.354305	0.0980415	4.56359	3.13206	3.51802		9.43844	0.756565	-1.2096	-1.07176	0.491329	0.151806	0.9911	-0.339825	-1.5891	-1.17374	3.98434	2.77829	-0.896782	0.567013	1.25144	0.0620537	1.51011
	9.44868	5.05642	4.05834	4.85258	13.9034	-0.205048	6.26415	5.77093	3.16051	4.44535	1.74563	6.00208	6.22439	6.52507	5.20736	2.81202	4.72557	4.90595	5.3661	3.02612	5.11324	5.22721	2.78557	3.56617	2.68491	2.26913	0.564495	0.0732346	4.40384	3.13226	3.57661		9.44868	0.699074	-1.0509	-1.16204	0.448032	0.0341835	1.05001	-0.274357	-1.49974	-1.3373	4.19233	2.78104	-0.84259	0.58654	1.22384	-0.0901871	1.75696
	9.45892	5.10146	3.96457	4.83392	14.1988	-0.202854	6.25334	5.81244	2.91312	4.46185	1.66392	5.87117	6.08832	6.42697	5.03012	2.79121	4.7542	4.92425	5.38638	2.86938	5.12901	5.16349	2.45609	3.68916	2.54363	2.28095	0.737053	0.050705	4.14902	3.15214	3.67462		9.45892	0.798923	-0.833874	-1.28049	0.478382	-0.101585	1.15095	-0.277287	-1.4049	-1.45934	4.41028	2.79789	-0.796741	0.527817	1.07277	-0.246567	2.01489
	9.46916	5.0793	3.88198	4.77798	14.3649	-0.2094	6.32079	5.81145	2.85141	4.47284	1.747	5.90935	6.01598	6.40562	4.9197	2.86594	4.86267	5.11226	5.47558	2.80327	5.19268	5.14434	2.24393	3.6873	2.5204	2.30928	0.961082	-0.0397758	3.92405	3.11709	3.72615		9.46916	0.838131	-0.696808	-1.38607	0.519783	-0.181477	1.2903	-0.255733	-1.20541	-1.44027	4.4875	2.82839	-0.815304	0.622444	1.24598	-0.250751	1.99089
	9.4794	5.01714	3.85288	4.79695	14.4864	-0.231201	6.2627	5.80547	2.65811	4.52418	1.69895	5.93983	6.0133	6.4036	4.86006	2.8813	5.044	5.22163	5.58116	2.80958	5.29721	5.06108	2.09673	4.2422	2.4769	2.12236	1.11108	-0.104042	3.84152	3.05605	3.7915		9.4794	0.859325	-0.422401	-1.52785	0.518993	-0.292095	1.3967	-0.271957	-1.06395	-1.42508	4.65198	3.00116	-0.881596	0.605312	1.28117	-0.27837	1.84482
	9.48964	4.93233	3.6753	4.75947	14.5974	-0.268955	6.24036	5.76393	2.65019	4.50658	1.66856	5.99493	5.90327	6.4991	4.80872	3.08558	5.07558	5.30248	5.61266	2.67334	5.35248	4.95586	2.05611	4.57565	2.40295	2.00877	1.21756	-0.170181	3.74439	2.99043	3.92169		9.48964	0.839466	-0.0667534	-1.55165	0.474697	-0.296337	1.61359	-0.175983	-0.879795	-1.47926	4.86061	3.1791	-0.898739	0.653999	1.35899	-0.357658	1.80332
	9.49988	4.90731	3.41003	4.77187	14.7191	-0.277275	6.28237	5.75054	2.6981	4.55155	1.75581	5.98413	5.81024	6.47663	4.70326	3.24635	5.07778	5.32217	5.64193	2.69595	5.24607	4.91604	2.02672	4.43211	2.38765	1.97307	1.24803	-0.0912247	3.62345	2.85806	4.06538		9.49988	0.743671	0.250702	-1.70223	0.5042	-0.297947	1.79068	-0.115688	-0.80859	-1.51787	5.2185	3.2939	-0.767941	0.672535	1.35186	-0.346561	1.68525
	9.51012	4.96452	3.15701	4.82549	14.8052	-0.310059	6.18929	5.71124	2.5747	4.56876	1.72795	5.82667	5.70032	6.43984	4.5329	3.23566	5.06797	5.4369	5.61452	2.59712	5.10087	4.81683	1.89948	4.3209	2.33908	1.95533	1.43733	-0.187572	3.41614	2.74539	4.11934		9.51012	0.674625	0.392658	-1.77212	0.563866	-0.382931	2.05141	0.0596352	-0.68671	-1.61432	5.47345	3.33977	-0.728649	0.674564	1.2331	-0.217682	1.68388
	9.52036	4.95661	3.01833	4.88639	14.9561	-0.238548	6.13505	5.72395	2.36634	4.5719	1.67344	5.70327	5.56177	6.34851	4.48856	3.28189	5.10335	5.61519	5.54207	2.40557	4.98327	4.68086	1.76007	4.36827	2.19915	1.97736	1.56714	-0.193649	3.29866	2.59454	4.18885		9.52036	0.580364	0.53989	-1.82012	0.587303	-0.496868	2.19958	0.191338	-0.549679	-1.74214	5.59039	3.36918	-0.692661	0.753635	1.21124	-0.0333138	1.75434
	9.5306	4.8795	2.8586	4.85006	14.9393	-0.198288	6.02969	5.78374	2.17146	4.73009	1.66195	5.59315	5.35246	6.25877	4.49146	3.35212	5.02187	5.64831	5.47712	2.36595	4.9598	4.53898	1.62539	4.37314	2.08967	1.90573	1.72215	-0.110813	3.09767	2.46443	4.21864		9.5306	0.538677	0.730434	-1.82806	0.6404	-0.567287	2.33328	0.237675	-0.456875	-1.88063	5.70601	3.47187	-0.614136	0.824444	1.23513	0.0142403	1.70625
	9.54084	4.84834	2.72551	4.81259	14.7967	-0.194736	5.93138	5.7005	2.08874	4.85905	1.67711	5.63025	5.14534	6.0725	4.33313	3.46458	4.92987	5.54213	5.4689	2.27931	4.94862	4.47544	1.58053	4.44419	2.05957	1.71294	1.90071	0.0549698	2.96028	2.32469	4.29112		9.54084	0.586704	0.871067	-1.92065	0.609104	-0.530903	2.50258	0.216728	-0.255283	-1.82524	5.9011	3.46195	-0.467236	0.799019	1.22198	0.0576439	1.70421
	9.55108	4.71913	2.57999	4.76337	14.5945	-0.139366	5.88426	5.48865	1.96444	4.82728	1.60442	5.5136	4.9328	5.86087	4.23347	3.45365	4.85192	5.60462	5.4441	2.20303	5.03346	4.44385	1.39365	4.55968	1.94756	1.54714	1.91107	0.185555	2.8137	2.39376	4.36736		9.55108	0.734776	1.01164	-2.1231	0.624279	-0.580162	2.72318	0.27599	-0.20097	-1.87876	5.92927	3.43161	-0.397198	0.850147	1.27205	0.0819626	1.68228
	9.56132	4.7234	2.50322	4.70648	14.3982	-0.0817146	5.64522	5.34674	1.92654	4.78607	1.41285	5.51598	4.87088	5.61101	4.06445	3.44398	4.70719	5.59307	5.40523	1.97725	4.95808	4.48385	1.26308	4.64648	1.79731	1.50447	2.02913	0.270561	2.68018	2.37831	4.44107		9.56132	0.866741	1.25522	-2.37821	0.586754	-0.502068	2.97279	0.255043	-0.0995941	-1.95293	5.99389	3.52209	-0.367718	0.925846	1.34495	0.114948	1.76675
	9.57156	4.69367	2.41311	4.69617	14.2046	-0.0543556	5.51778	5.3027	1.75208	4.85424	1.29102	5.34342	4.7246	5.35766	3.89011	3.49865	4.61383	5.61674	5.43909	1.83498	4.85362	4.41782	1.19028	4.70295	1.63416	1.48365	2.0677	0.28624	2.61429	2.27776	4.46719		9.57156	0.87138	1.50238	-2.51324	0.593525	-0.380878	3.27974	0.239712	-0.0401802	-2.09541	6.08249	3.54846	-0.29443	0.900188	1.40245	0.281719	1.89808
	9.5818	4.65574	2.30323	4.68084	13.868	-0.0424347	5.44616	5.2392	1.67846	4.83411	1.2812	5.23801	4.48883	5.24565	3.82967	3.54332	4.59992	5.61326	5.39592	1.8485	4.77016	4.22364	1.15332	4.77013	1.49561	1.40667	2.127	0.28421	2.53767	2.17236	4.53843		9.5818	0.872452	1.69828	-2.6947	0.589973	-0.326542	3.4849	0.320431	0.0397491	-2.13536	5.97053	3.55359	-0.238377	0.865036	1.41293	0.374264	1.93586
	9.59204	4.64994	2.15931	4.63916	13.4786	-0.0578461	5.44596	5.28646	1.51048	4.78001	1.20654	5.05994	4.28657	5.16661	3.72899	3.51418	4.59787	5.53767	5.28915	1.72847	4.63362	4.12447	1.06474	4.96253	1.3824	1.34943	2.19393	0.382942	2.41224	1.97864	4.56357		9.59204	0.965935	1.98018	-2.81323	0.656384	-0.306839	3.77033	0.404888	0.111095	-2.22561	5.97609	3.49221	-0.165562	0.917465	1.36221	0.477249	2.0852
	9.60228	4.7804	1.97844	4.56862	13.0437	-0.0848732	5.3428	5.20398	1.26794	4.74843	1.17548	4.84747	4.1744	5.07316	3.5216	3.54295	4.54587	5.39822	5.14076	1.53872	4.47348	4.05269	0.937141	5.09801	1.2366	1.20743	2.32351	0.355484	2.19728	1.86133	4.55016		9.60228	1.0135	2.08315	-2.80045	0.629917	-0.399273	3.97906	0.537678	0.372143	-2.2286	6.0301	3.54218	-0.0806046	0.987644	1.41455	0.493031	2.13467
	9.61252	4.88453	1.83021	4.50193	12.6141	-0.102505	5.2738	5.04116	1.2644	4.64614	1.24169	4.66677	4.09769	4.92352	3.35364	3.66266	4.52269	5.24373	4.93846	1.46605	4.32344	3.99292	0.888672	5.16051	1.13585	1.1737	2.44351	0.290932	2.04286	1.68888	4.51379		9.61252	1.05463	2.1063	-2.80967	0.785595	-0.357681	4.18513	0.593357	0.539799	-2.25353	6.04652	3.46505	0.0668335	0.971287	1.38577	0.542526	2.12114
	9.62276	4.91805	1.75509	4.39442	12.0705	-0.133152	5.04346	4.89978	1.13259	4.56171	1.30644	4.66774	3.89529	4.72469	3.45074	3.79992	4.48227	5.16444	4.68076	1.32015	4.25443	3.9109	0.865868	5.20007	1.15872	1.10168	2.50671	0.211338	1.91533	1.51604	4.53376		9.62276	1.12502	2.22763	-2.86619	0.911442	-0.292152	4.38839	0.662975	0.70985	-2.2433	6.01241	3.37159	0.1646	0.907379	1.33473	0.645466	2.21979
	9.633	4.92586	1.66975	4.44224	11.5339	-0.150116	4.88815	4.75758	0.933937	4.56492	1.38216	4.6204	3.75446	4.46648	3.59435	3.71828	4.30571	5.10859	4.50614	1.16888	4.21923	3.90726	0.896042	5.05199	1.0903	1.19286	2.51125	0.286858	1.84042	1.43886	4.61762		9.633	1.24475	2.29942	-2.96909	0.950542	-0.285309	4.49339	0.699741	0.911182	-2.18694	6.02494	3.47288	0.222618	0.947029	1.40838	0.685139	2.3358
	9.64324	4.95342	1.61001	4.37497	10.9456	-0.232777	4.70822	4.76537	0.869194	4.42485	1.34468	4.5684	3.68904	4.26028	3.54635	3.67142	4.087	5.13497	4.34596	1.04974	4.15001	3.83799	0.916866	4.98016	0.94606	1.20968	2.55393	0.462021	1.7414	1.39922	4.60964		9.64324	1.27847	2.46033	-2.89373	0.995712	-0.190456	4.79099	0.760048	1.08249	-2.07749	5.9836	3.52619	0.434788	0.970406	1.45785	0.747566	2.44201
	9.65348	5.09175	1.44133	4.30845	10.4261	-0.277981	4.59677	4.66685	0.904564	4.35875	1.29072	4.49109	3.6137	4.02265	3.57939	3.65316	3.95482	5.08253	4.17757	0.8619	4.09235	3.69584	0.971439	4.86258	0.760178	1.22327	2.67058	0.683407	1.72494	1.28185	4.64449		9.65348	1.4001	2.64072	-2.95063	1.13888	0.0206642	5.01499	0.872128	1.34342	-1.91764	5.84871	3.63834	0.601513	0.899677	1.40604	0.801056	2.55219
	9.66372	5.15966	1.36245	4.2563	9.96751	-0.284416	4.44497	4.51231	0.810913	4.27622	1.12256	4.36131	3.42764	3.9519	3.50339	3.63049	3.94456	4.88841	3.86187	0.685421	4.07186	3.62577	1.02065	4.85823	0.637047	1.10085	2.84129	0.865334	1.71339	1.14925	4.74863		9.66372	1.45382	2.83546	-3.01453	1.2803	0.0805779	5.18796	0.923222	1.48032	-1.7606	5.80022	3.51537	0.825363	0.938419	1.41874	0.881535	2.56952
	9.67396	5.26309	1.20695	4.30361	9.44509	-0.364193	4.32545	4.47963	0.726562	4.14708	1.0839	4.20607	3.23158	3.81325	3.40881	3.50911	3.87718	4.68641	4.10427	0.467758	4.01801	3.63222	0.948994	4.8777	0.599091	0.997833	2.86578	1.01307	1.71674	0.943962	4.81987		9.67396	1.60204	2.873	-3.10345	1.25166	0.132721	5.30565	1.08426	1.70762	-1.64189	5.74116	3.49895	1.00344	1.08537	1.40343	0.86948	2.70982
	9.6842	5.44099	1.1302	4.4677	8.85834	-0.407299	4.17448	4.34907	0.702648	4.19352	1.13635	4.08369	3.01719	3.58705	3.33961	3.39448	3.83686	4.55163	4.17699	0.281769	3.87401	3.67056	1.06796	4.89017	0.440136	1.01556	2.98443	1.15532	1.70714	0.830486	4.83969		9.6842	1.75514	2.87766	-3.11753	1.41613	0.161724	5.32264	1.14043	1.93637	-1.57441	5.69901	3.39856	1.21049	1.14109	1.35588	0.880508	2.68475
	9.69444	5.62529	1.10909	4.45673	8.26826	-0.521416	3.9931	4.2992	0.65966	4.11519	1.20256	4.02113	2.93862	3.36535	3.31196	3.33558	3.66994	4.51567	3.8116	0.317398	3.68743	3.73276	1.19046	4.83073	0.359074	1.11506	3.14043	1.25041	1.62846	0.536053	4.85248		9.69444	1.76243	2.96751	-3.12503	1.6776	0.216084	5.31817	1.1306	2.261	-1.49212	5.69316	3.20738	1.33688	1.20329	1.2778	0.946323	2.65583
	9.70468	5.74975	1.0585	4.31658	7.70348	-0.541874	3.90948	4.24847	0.605576	3.98149	1.27739	3.90752	2.86729	3.20763	3.30228	3.3824	3.52214	4.50569	3.37785	0.315041	3.63402	3.88503	1.25272	4.83779	0.273277	1.19403	3.26739	1.2673	1.5499	0.381176	4.82154		9.70468	1.85564	2.96604	-3.23849	1.8507	0.283272	5.36323	1.18476	2.51327	-1.37199	5.68857	3.13458	1.40224	1.23938	1.20438	1.11294	2.73275
	9.71492	5.86266	0.960091	4.2946	7.18255	-0.43642	3.79638	4.26301	0.581413	3.90009	1.28337	3.87477	2.77541	3.06833	3.21276	3.44555	3.41493	4.53683	3.17387	0.291138	3.56137	3.83986	1.26191	4.83159	0.281147	1.20637	3.3998	1.20626	1.48531	0.334637	4.87628		9.71492	1.93225	2.86502	-3.33947	1.97369	0.422733	5.39137	1.27876	2.63549	-1.24817	5.68923	3.12885	1.40297	1.31742	1.1175	1.22625	2.76508
	9.72516	5.86107	0.881008	4.19519	6.71232	-0.454899	3.65069	4.3361	0.66481	3.7861	1.49199	3.80552	2.69351	2.9094	3.26013	3.40372	3.36645	4.43607	2.92157	0.212399	3.56271	3.7462	1.24694	4.74226	0.240273	1.20467	3.51534	1.2263	1.48223	0.3027	4.93943		9.72516	2.03809	2.79028	-3.37525	2.08926	0.582928	5.48721	1.41665	2.9041	-1.13847	5.68144	3.1302	1.41684	1.33078	1.04525	1.33304	2.67162
	9.7354	5.91967	0.842148	4.11088	6.18689	-0.476429	3.38993	4.42243	0.663139	3.68864	1.6637	3.67338	2.60069	2.82016	3.16688	3.35252	3.29539	4.30558	2.64143	0.183121	3.54772	3.70288	1.21555	4.64198	0.323921	1.13994	3.53637	1.32877	1.52219	0.178284	4.86985		9.7354	2.14276	2.86515	-3.37463	2.24035	0.730663	5.51272	1.59437	3.14657	-1.0794	5.61777	2.96747	1.5213	1.33166	1.04253	1.31026	2.63869
	9.74564	5.93044	0.821404	4.04091	5.56521	-0.552853	3.0692	4.46961	0.740223	3.64871	1.70647	3.62546	2.48261	2.65163	3.10879	3.29827	3.17853	4.23382	2.48236	0.0931892	3.48219	3.7412	1.11716	4.52319	0.279419	1.20136	3.56638	1.39738	1.55096	0.0590363	4.92809		9.74564	2.36202	2.91038	-3.37208	2.30246	0.874859	5.50237	1.80703	3.38012	-0.993855	5.59106	2.80511	1.62367	1.53144	0.898746	1.36221	2.72467
	9.75588	6.08877	0.704758	4.06914	5.069	-0.492939	2.97691	4.35961	0.845413	3.63484	1.69473	3.6218	2.36236	2.38932	3.14928	3.23965	2.98877	4.19375	2.3431	0.0712814	3.4272	3.72191	1.14542	4.43184	0.289574	1.25814	3.58248	1.44043	1.60783	-0.0490723	4.91902		9.75588	2.43792	2.89688	-3.33287	2.38634	0.93214	5.48921	1.94103	3.51812	-0.791744	5.46176	2.71162	1.73684	1.69601	0.831825	1.34921	2.71914
	9.76612	6.18777	0.734333	4.00489	4.53868	-0.504837	2.92712	4.34513	0.883965	3.58949	1.83598	3.57962	2.20892	2.22815	2.9994	3.20937	2.91877	4.14587	2.18935	0.0118179	3.30773	3.78023	1.18874	4.4125	0.318424	1.26847	3.65926	1.28726	1.54581	-0.0605164	4.87348		9.76612	2.54631	2.84689	-3.31165	2.5745	1.11695	5.4959	2.07127	3.68369	-0.625652	5.43179	2.61394	1.7383	1.85994	0.927692	1.3777	2.69336
	9.77636	6.14016	0.756947	3.90707	4.02182	-0.447342	2.80332	4.269	0.865715	3.52534	1.93163	3.58066	2.24121	2.25089	2.7779	3.1492	2.8726	4.03816	1.98254	0.0199966	3.27369	3.71045	1.27909	4.43461	0.416412	1.24035	3.79729	1.23071	1.66161	-0.0842285	4.9725		9.77636	2.73664	2.78148	-3.27961	2.62361	1.20932	5.466	2.10195	3.96175	-0.499744	5.47087	2.52741	1.76035	1.94278	0.951305	1.47906	2.55854
	9.7866	6.23524	0.754478	3.85191	3.52057	-0.399643	2.62484	4.25307	0.895554	3.43639	2.09237	3.61072	2.21371	2.15727	2.68264	3.26847	2.90279	3.95365	1.76868	-0.0771027	3.13299	3.70625	1.31282	4.37123	0.418976	1.3191	3.89749	1.2307	1.74514	-0.159653	4.97257		9.7866	2.86719	2.7152	-3.32828	2.5454	1.27716	5.44892	2.20362	4.16405	-0.363605	5.3907	2.45702	1.83827	1.90747	0.842613	1.49559	2.54534
	9.79684	6.29004	0.53299	3.75361	3.05997	-0.362808	2.38339	4.4301	0.915901	3.28204	2.23278	3.62691	2.03536	2.03766	2.6812	3.31351	2.86985	3.79844	1.49458	-0.0812492	3.03473	3.80805	1.34251	4.26839	0.473946	1.45514	3.94857	1.24014	1.73049	-0.14537	5.02861		9.79684	3.09175	2.79086	-3.36204	2.5363	1.38099	5.57604	2.29675	4.23952	-0.241417	5.32039	2.27435	1.8343	1.84048	0.74324	1.57677	2.64133
	9.80708	6.35698	0.527374	3.72519	2.72642	-0.269562	2.2038	4.56151	0.974098	3.24077	2.46024	3.689	1.8528	1.84403	2.75435	3.33018	2.90334	3.72953	1.27052	-0.16571	3.05571	3.93806	1.28181	4.31498	0.643593	1.55828	4.08739	1.21864	1.62944	-0.12302	4.94317		9.80708	3.22083	2.72609	-3.35229	2.46363	1.4861	5.63006	2.45454	4.39782	-0.203449	5.30328	2.13835	1.73288	1.92426	0.679401	1.56967	2.5771
	9.81732	6.40177	0.472404	3.76381	2.24522	-0.142036	1.98328	4.5905	1.06333	3.12462	2.84451	3.71391	1.77324	1.80272	2.58387	3.36345	2.83262	3.71105	1.173	-0.121662	2.97661	3.96463	1.18441	4.20668	0.737469	1.66727	4.28449	1.27073	1.61275	0.0218315	5.10869		9.81732	3.4918	2.76255	-3.43762	2.54436	1.59568	5.63937	2.56379	4.49776	-0.0507889	5.25699	2.0588	1.76313	2.0348	0.676506	1.64288	2.47519
	9.82756	6.52151	0.370422	3.8095	1.86451	-0.0480385	1.83141	4.60437	1.28792	3.05521	3.28392	3.74516	1.72223	1.77999	2.53596	3.43259	2.81556	3.59911	0.955849	-0.172478	2.97418	4.01897	1.20137	4.09414	0.902538	1.78011	4.37516	1.30499	1.71235	0.110832	5.17389		9.82756	3.78265	2.88618	-3.46186	2.66911	1.60652	5.52588	2.78355	4.54881	0.0463791	5.22273	1.9411	1.71937	2.10365	0.648659	1.6506	2.45629
	9.8378	6.55529	0.198021	3.82306	1.58131	0.087574	1.62859	4.62189	1.4381	3.00278	3.65055	3.71859	1.69857	1.77461	2.47373	3.56646	2.84156	3.59882	0.871639	-0.328766	2.96351	4.08929	1.19423	3.90456	1.09231	1.93721	4.43365	1.31171	1.808	0.243439	5.24239		9.8378	4.01138	2.87028	-3.36937	2.62017	1.61673	5.46966	2.90713	4.67998	0.0332413	5.22938	1.76166	1.61015	2.21783	0.560848	1.57405	2.44089
	9.84804	6.36647	0.141098	3.79212	1.35788	0.221756	1.38566	4.57905	1.56989	2.94608	3.89434	3.7138	1.62297	1.81755	2.38952	3.67041	2.81513	3.61689	0.882965	-0.367256	3.02887	4.25976	1.21149	3.78163	1.27545	2.07133	4.64636	1.37357	1.84127	0.364365	5.23531		9.84804	4.12617	2.79084	-3.22168	2.55769	1.71371	5.4226	2.91854	4.87378	0.116188	5.17072	1.51263	1.61434	2.36151	0.467747	1.6529	2.46756
	9.85828	6.33188	0.0956192	3.83315	0.984909	0.415436	1.21385	4.56983	1.64629	2.87273	4.18716	3.78175	1.56684	1.81234	2.31419	3.74126	2.81485	3.4595	0.873783	-0.473244	3.07938	4.29936	1.23066	3.77746	1.4563	2.18652	4.85179	1.31876	1.97714	0.50563	5.22075		9.85828	4.21494	2.69557	-3.07086	2.64257	1.7713	5.29948	2.97896	5.08857	0.287159	5.17016	1.38406	1.67505	2.44443	0.320667	1.65704	2.41436
	9.86852	6.28666	0.0384483	3.95326	0.790195	0.549309	1.01883	4.54774	1.70192	2.78198	4.53972	3.89944	1.44354	1.77889	2.2404	3.7365	2.72755	3.39957	0.819664	-0.477753	3.10352	4.32919	1.29237	3.73806	1.64044	2.30597	4.99828	1.3194	2.10593	0.548153	5.20127		9.86852	4.23517	2.52552	-2.84585	2.62131	1.77403	5.21257	3.25212	5.14796	0.530369	5.20709	1.35492	1.65882	2.49561	0.156696	1.54684	2.42557
	9.87876	6.26406	0.0978508	4.00222	0.396103	0.725883	0.934853	4.63466	1.74975	2.7563	4.85939	4.08572	1.38456	1.81147	2.2012	3.81844	2.69175	3.27164	0.700741	-0.429565	3.09312	4.45291	1.31327	3.71789	1.78244	2.33519	5.13827	1.3728	2.18952	0.706081	5.10627		9.87876	4.22395	2.45759	-2.6605	2.61364	1.78333	5.21831	3.34709	5.25271	0.581818	5.22969	1.34307	1.67278	2.50785	0.052887	1.44447	2.41999
	9.889	6.22084	0.0961571	3.90495	0.0673218	0.836937	0.775627	4.70016	1.7398	2.73619	5.12247	4.12746	1.28465	1.93991	2.11052	3.77722	2.63729	3.17696	0.4702	-0.312752	3.10401	4.60525	1.41126	3.71552	1.97163	2.37775	5.42472	1.43571	2.27315	0.897198	5.02131		9.889	4.29164	2.38677	-2.47792	2.64402	2.00148	5.11773	3.35341	5.42485	0.667648	5.17021	1.23162	1.62857	2.69432	0.0582771	1.52588	2.31305
	9.89924	6.27776	0.208263	3.90438	-0.211033	0.940933	0.60611	4.68704	1.90232	2.76545	5.47709	4.26115	1.3988	2.0661	2.07762	3.83303	2.6813	3.13527	0.341301	-0.216587	3.10266	4.75647	1.43676	3.5887	2.23515	2.47335	5.55944	1.40349	2.39991	1.03024	4.89631		9.89924	4.49983	2.34181	-2.39199	2.62713	2.13565	5.09761	3.48668	5.4545	0.824314	5.11908	1.19534	1.5696	2.85492	-0.0640564	1.48403	2.28051
	9.90948	6.30437	0.314766	3.89649	-0.667137	1.12943	0.427525	4.69638	1.9528	2.72479	5.74636	4.33675	1.47157	2.19141	2.0701	3.94604	2.67535	3.04864	0.2453	-0.240738	3.03977	4.88223	1.30679	3.56023	2.40335	2.67056	5.70457	1.44743	2.51881	1.25337	4.77192		9.90948	4.66916	2.27937	-2.30442	2.70134	2.15984	4.96728	3.65126	5.58715	0.862804	5.05174	1.04573	1.46204	2.84393	-0.175175	1.5708	2.19057
	9.91972	6.29949	0.325947	3.96799	-0.922115	1.28852	0.344803	4.70641	1.98637	2.68089	6.02241	4.27746	1.50675	2.28123	1.96326	3.99836	2.70753	2.93888	0.181774	-0.196144	3.09912	4.9442	1.14807	3.46404	2.62378	2.83133	5.83539	1.5733	2.61623	1.50959	4.78447		9.91972	4.73318	2.24202	-2.27638	2.69756	2.2123	4.58178	3.73729	5.62847	0.916237	4.88649	0.849216	1.31484	2.93293	-0.298122	1.49212	2.0874
	9.92996	6.16036	0.313118	4.03539	-1.19662	1.51253	0.178066	4.72571	2.03539	2.65416	6.21653	4.19026	1.5209	2.35261	1.92035	4.06153	2.69616	3.00347	0.0985184	-0.122746	3.09444	5.03997	1.08479	3.41069	2.8746	2.8871	6.06076	1.51064	2.82553	1.81601	4.70111		9.92996	4.82293	2.28601	-2.16209	2.71724	2.30117	4.39259	3.76566	5.70112	1.00717	4.909	0.755779	1.30505	3.07183	-0.276691	1.54629	2.00219
	9.9402	6.01379	0.410656	4.0667	-1.31449	1.63824	-0.205059	4.64195	2.12381	2.62523	6.4626	4.12634	1.54789	2.38206	1.8203	4.18759	2.85849	3.12415	0.234024	-0.0317917	3.1185	5.05401	1.0309	3.41609	3.04361	3.05989	6.40707	1.57529	3.08659	2.1955	4.51086		9.9402	4.79748	2.293	-2.15452	2.73391	2.31574	4.24588	3.91273	5.58633	1.09972	4.89706	0.731796	1.30226	3.16438	-0.402313	1.58237	1.94451
	9.95044	5.93797	0.590042	4.18234	-1.45906	1.86708	-0.404617	4.58861	2.31759	2.64231	6.72329	4.22048	1.55502	2.51701	1.70652	4.33501	2.94571	3.21871	0.364986	0.0334663	3.15435	5.06247	1.01984	3.27777	3.22379	3.20663	6.71765	1.67373	3.31134	2.56948	4.34001		9.95044	4.80238	2.25853	-2.01728	2.81449	2.30873	4.03206	4.08518	5.40572	1.29102	4.72197	0.647266	1.37437	3.12881	-0.443787	1.67225	1.88839
	9.96068	5.87927	0.686554	4.253	-1.66256	2.04662	-0.484379	4.69041	2.46144	2.74496	7.01905	4.26652	1.56421	2.70212	1.6802	4.34584	3.02246	3.28985	0.390163	0.103432	3.21658	5.18911	1.14027	3.11018	3.44055	3.4217	6.79462	1.71528	3.35054	2.94759	4.27356		9.96068	4.83373	2.18941	-1.81089	2.85489	2.32339	3.74471	4.25293	5.26323	1.34004	4.57792	0.593025	1.33452	3.11257	-0.446575	1.71318	1.81751
	9.97092	5.81568	0.730591	4.28326	-1.86276	2.20367	-0.517891	4.75543	2.50471	2.89151	7.40983	4.40375	1.53899	2.75526	1.80476	4.37574	3.12264	3.32778	0.401989	0.157825	3.24031	5.22825	1.12981	3.00907	3.64095	3.55524	6.87266	1.72941	3.34648	3.15384	4.31666		9.97092	4.93168	2.09997	-1.56018	2.80829	2.32505	3.58037	4.49501	5.26634	1.4191	4.51142	0.450294	1.17616	3.08942	-0.409908	1.80666	1.70178
	9.98116	5.73488	0.749901	4.26724	-2.0745	2.37909	-0.559029	4.65496	2.58624	2.94439	7.68923	4.4364	1.4043	2.91213	1.74883	4.43708	3.13783	3.35312	0.486626	0.307278	3.18163	5.30062	1.02151	2.99466	3.90617	3.69106	7.13294	1.80807	3.41701	3.40147	4.25754		9.98116	4.93854	2.02078	-1.48404	2.7579	2.4223	3.45014	4.50898	5.26304	1.52141	4.36822	0.43507	1.14682	2.97356	-0.424629	1.87468	1.59492
	9.9914	5.50613	0.93401	4.3907	-2.34347	2.708	-0.579556	4.54879	2.78102	3.11574	7.77402	4.53718	1.41933	3.06841	1.61937	4.52606	3.22252	3.43996	0.601357	0.439697	3.19893	5.38364	0.906567	2.95147	4.1459	3.80981	7.27729	2.05374	3.48213	3.49633	4.20345		9.9914	4.9397	1.88819	-1.365	2.75241	2.5433	3.31126	4.61134	5.24406	1.7364	4.17566	0.4062	1.06266	2.95098	-0.477833	1.81427	1.63283
	10.0016	5.36203	1.07632	4.43394	-2.42488	2.94785	-0.612328	4.4222	2.81065	3.22445	7.994	4.63066	1.39425	3.141	1.6112	4.61821	3.33056	3.55922	0.603058	0.526157	3.33157	5.52888	0.750439	2.97739	4.37857	3.91859	7.41187	2.16496	3.60537	3.52569	4.10494		10.0016	4.84748	1.81377	-1.28209	2.57518	2.65822	3.08486	4.67023	5.22273	1.71192	4.07235	0.353413	1.08891	2.97046	-0.445587	1.87824	1.54752
	10.0119	5.15001	1.19303	4.33474	-2.57153	3.14697	-0.671265	4.352	2.86346	3.19336	8.12337	4.60927	1.37286	3.17051	1.59983	4.69383	3.33918	3.67614	0.627106	0.611286	3.31394	5.49465	0.650398	3.02183	4.61182	4.09108	7.62548	2.23425	3.67735	3.72414	4.09247		10.0119	4.74456	1.77896	-1.34977	2.59893	2.73717	2.93514	4.74664	5.19974	1.77797	4.01824	0.231129	1.06288	2.96137	-0.430492	1.78555	1.56136
	10.0221	4.99612	1.31579	4.32554	-2.61205	3.28397	-0.791569	4.16212	2.94901	3.23469	8.22045	4.50683	1.44252	3.2584	1.57469	4.87334	3.35151	3.66558	0.659706	0.705475	3.35078	5.55822	0.610977	3.04953	4.80882	4.24732	7.95832	2.50309	3.6958	3.89677	4.00496		10.0221	4.75885	1.93317	-1.30693	2.66056	2.72908	2.91396	4.80146	5.10244	1.76656	3.85967	0.112278	1.02686	2.91339	-0.46286	1.8283	1.60138
	10.0324	4.83878	1.31891	4.31406	-2.67421	3.40052	-0.971622	4.08833	3.01954	3.19486	8.20791	4.56176	1.56007	3.22405	1.42951	5.0291	3.25148	3.67677	0.591125	0.823502	3.32726	5.48894	0.727135	3.02358	4.98214	4.38853	8.18564	2.64088	3.70373	4.02208	3.87617		10.0324	4.89947	2.04958	-1.15583	2.65691	2.80936	2.82872	4.91529	5.06135	1.83702	3.68963	-0.0919991	1.0513	2.9177	-0.487415	1.81683	1.31213
	10.0426	4.70565	1.54012	4.30862	-2.76198	3.68916	-1.08054	4.07748	3.02837	3.21994	8.25613	4.59705	1.65732	3.15985	1.37112	5.17322	3.22246	3.82439	0.580101	0.97237	3.29926	5.45518	0.731529	3.01825	5.12169	4.48616	8.36888	2.89162	3.73173	4.32715	3.82582		10.0426	4.97741	2.05396	-1.09632	2.63051	2.83941	2.61345	5.04085	5.067	1.84477	3.59492	-0.180775	1.01964	2.97012	-0.525803	1.91585	1.29512
	10.0528	4.56536	1.60833	4.35686	-2.7663	3.75006	-1.06171	4.12857	3.03786	3.35502	8.23635	4.58475	1.67751	3.23364	1.33516	5.10422	3.30066	3.89492	0.554684	1.21309	3.19261	5.47407	0.675037	2.97217	5.30535	4.74214	8.49816	3.0956	3.88135	4.53204	3.68852		10.0528	4.88043	2.0934	-0.991589	2.7572	2.90351	2.39052	5.17648	4.92935	1.81231	3.4883	-0.177116	0.962643	3.06402	-0.593761	1.90347	1.17289
	10.0631	4.34632	1.87379	4.24	-2.75638	3.83412	-1.04874	4.21219	2.93862	3.45431	8.22584	4.51303	1.64165	3.33871	1.4483	5.03927	3.30925	3.92359	0.593819	1.42445	3.12199	5.38696	0.525288	2.94341	5.39946	5.14257	8.65474	3.35113	4.02962	4.62408	3.50443		10.0631	4.84111	2.13743	-0.736469	2.73884	3.06142	2.16304	5.31894	4.7834	1.81018	3.41764	-0.329906	1.00887	3.10348	-0.607876	2.00012	1.11572
	10.0733	4.08252	2.412	4.13573	-2.76923	4.04582	-1.1356	4.15792	2.82444	3.39785	8.2374	4.59242	1.528	3.44969	1.54317	5.02893	3.15102	3.85873	0.631802	1.61043	3.11151	5.28224	0.386292	2.92639	5.48476	5.35876	8.86281	3.47468	3.98277	4.69692	3.42783		10.0733	4.72714	2.06917	-0.507767	2.66944	3.05925	1.94545	5.32214	4.55688	1.71247	3.42384	-0.329296	1.00284	3.07208	-0.588032	2.04336	1.00343
	10.0836	3.85287	2.50199	4.20014	-2.82936	4.24863	-1.2078	4.14282	2.77013	3.35286	8.24355	4.54268	1.56531	3.501	1.53591	5.15259	2.96357	3.938	0.586681	1.69187	3.20272	5.21362	0.380653	2.87402	5.55529	5.42593	8.93914	3.68481	3.98106	4.79815	3.28476		10.0836	4.6147	2.09625	-0.388798	2.60549	3.13907	1.80091	5.40964	4.45529	1.67358	3.38111	-0.277218	0.859852	3.13282	-0.713223	2.02187	0.910408
	10.0938	3.76851	2.51879	4.3106	-2.80542	4.32647	-1.19198	4.02715	2.72192	3.32809	8.29564	4.46384	1.57951	3.60212	1.49459	5.11069	2.86254	4.00208	0.593536	1.81013	3.22967	5.09081	0.355808	2.94735	5.50033	5.50242	9.00345	3.82156	4.01661	4.98126	3.23296		10.0938	4.54648	2.1311	-0.293331	2.66911	3.1956	1.67778	5.61497	4.41958	1.6703	3.27378	-0.204556	0.790791	3.04034	-0.919861	2.04465	0.743382
	10.104	3.64355	2.47451	4.36862	-2.81062	4.3611	-1.13626	3.90974	2.71569	3.33735	8.21925	4.45084	1.55367	3.61926	1.40744	5.10427	2.75766	4.0398	0.661781	2.05256	3.29061	5.05889	0.214603	3.01656	5.52498	5.54274	9.23435	4.0256	4.00602	5.05586	3.20621		10.104	4.40601	2.17873	-0.24044	2.75188	3.28215	1.59436	5.62504	4.28221	1.79081	3.14717	-0.218552	0.783833	3.0019	-0.996334	2.02994	0.647289
	10.1143	3.489	2.50584	4.4038	-2.75941	4.59538	-1.05019	3.79161	2.59275	3.53097	8.11805	4.45155	1.61071	3.58522	1.39391	5.17344	2.75113	4.03408	0.42128	2.19749	3.43258	4.96997	0.0698357	3.1288	5.60141	5.6278	9.4405	4.34818	4.02628	5.17565	3.07253		10.1143	4.24873	2.24724	-0.121494	2.74916	3.25301	1.27983	5.64021	4.10427	1.87378	3.00898	-0.242107	0.705509	2.91457	-0.955578	2.06798	0.686127
	10.1245	3.28341	2.54839	4.33664	-2.76328	4.80727	-1.03875	3.70571	2.67268	3.67468	8.00414	4.42332	1.60275	3.55934	1.38665	5.18339	2.791	4.02354	0.325516	2.44103	3.4974	4.78932	-0.0306931	3.05797	5.72199	5.70764	9.78976	4.70207	3.98255	5.22805	2.91854		10.1245	4.08708	2.25044	-0.0235863	2.76443	3.29263	1.01444	5.73545	3.96506	1.86557	2.90988	-0.294453	0.59716	2.8873	-0.977558	2.10067	0.722664
	10.1348	3.13081	2.59209	4.20189	-2.77971	4.88682	-0.962563	3.66551	2.75656	3.72435	7.97123	4.38854	1.70211	3.55815	1.49101	5.22452	2.7376	3.97538	0.235512	2.76925	3.57378	4.62661	0.00536728	2.97785	5.83439	5.88185	10.0868	4.99827	4.05383	5.31152	2.8398		10.1348	3.95533	2.35193	0.12825	2.68833	3.41926	0.908154	5.69654	3.75965	1.83429	2.83404	-0.391003	0.51231	2.79358	-0.985912	2.18447	0.677185
	10.145	3.04163	2.59732	4.06092	-2.75813	5.0159	-0.927872	3.48341	2.75046	3.72034	7.9394	4.35871	1.71041	3.55931	1.63964	5.29976	2.66836	3.98472	0.19268	3.11629	3.67637	4.48323	-0.0338402	2.95375	5.9938	5.92065	10.4182	5.17069	3.99851	5.43508	2.79085		10.145	3.90374	2.34953	0.274151	2.76689	3.66762	0.842995	5.70117	3.60202	1.80315	2.78999	-0.301823	0.474171	2.65201	-0.928135	2.22247	0.575905
	10.1552	2.87623	2.59371	4.06328	-2.79626	5.17457	-0.919815	3.34894	2.78075	3.7129	7.81539	4.31683	1.57322	3.61767	1.80228	5.3078	2.59786	3.92058	0.0917816	3.29128	3.81178	4.26717	-0.131638	2.92261	6.09676	6.06524	10.7113	5.39375	3.97303	5.45288	2.77274		10.1552	3.93782	2.37614	0.431305	2.77646	3.90902	0.819019	5.74298	3.60671	1.87637	2.69013	-0.367252	0.389629	2.57418	-0.975712	2.27154	0.514904
	10.1655	2.63902	2.74113	4.06102	-2.65877	5.2997	-0.865433	3.27747	2.83119	3.71547	7.62202	4.16206	1.50095	3.77586	1.79849	5.28223	2.61497	3.80639	0.0407715	3.29297	3.75748	4.04901	-0.156281	2.92198	6.15241	6.03042	10.9723	5.61856	4.03414	5.53272	2.61787		10.1655	3.80643	2.42198	0.58667	2.76543	4.05675	0.719662	5.84823	3.56929	1.9761	2.56534	-0.426407	0.348824	2.54338	-1.02046	2.31805	0.49947
	10.1757	2.45661	2.77129	3.94308	-2.47031	5.3433	-0.819775	3.29208	2.8958	3.7071	7.45659	4.15371	1.54205	3.81843	1.77027	5.12755	2.42913	3.83952	0.036232	3.46092	3.71133	3.9414	-0.274559	2.79951	6.10807	6.0074	11.2308	5.7177	3.98228	5.60991	2.57159		10.1757	3.70481	2.33285	0.723404	2.8093	4.1685	0.707905	5.89545	3.50364	1.92795	2.40527	-0.478333	0.40247	2.54825	-0.990673	2.43851	0.563675
	10.186	2.20938	2.76219	3.76283	-2.32977	5.3975	-0.780842	3.27383	2.81884	3.77501	7.30975	4.0695	1.53624	3.75072	1.77868	5.03796	2.25482	3.84329	-0.10844	3.55769	3.72167	3.78553	-0.282761	2.72725	6.16656	6.00005	11.4786	5.85361	3.86725	5.69672	2.40541		10.186	3.56057	2.23555	0.962215	2.90596	4.25443	0.629013	5.90659	3.34768	1.94799	2.18586	-0.531441	0.374859	2.48454	-0.871677	2.4068	0.533207
	10.1962	2.10529	2.74232	3.5271	-2.32163	5.4123	-0.760361	3.19121	2.7048	3.73794	7.01862	3.96828	1.34843	3.65652	1.75213	4.92182	2.28417	3.74355	-0.161407	3.73656	3.63714	3.58987	-0.384708	2.55986	6.22461	6.07306	11.7804	5.93991	3.71494	5.65753	2.40027		10.1962	3.59521	2.22513	1.14263	2.87349	4.47649	0.599533	5.88574	3.21288	2.02456	1.93601	-0.638752	0.355179	2.46643	-0.938087	2.37088	0.348278
	10.2064	2.0628	2.82604	3.34808	-2.28558	5.46225	-0.769051	3.18372	2.79992	3.76093	6.78522	3.88766	1.26273	3.54524	1.81913	5.00913	2.30352	3.54156	-0.224731	3.86362	3.53916	3.53419	-0.345871	2.6107	6.25313	6.17557	12.054	6.19586	3.5452	5.652	2.30477		10.2064	3.6101	2.19607	1.32131	2.80766	4.53543	0.42675	5.84889	3.13063	2.00794	1.86865	-0.768238	0.338142	2.41385	-0.935467	2.40824	0.34576
	10.2167	1.94527	2.82039	3.14342	-2.15828	5.45547	-0.631592	3.09152	2.93237	3.79383	6.67712	3.75346	1.04084	3.43464	1.8539	4.99431	2.25988	3.4526	-0.23317	4.08141	3.42976	3.33586	-0.431522	2.50201	6.23029	6.14119	12.312	6.37533	3.56704	5.69524	2.2648		10.2167	3.44067	2.12835	1.43831	2.87277	4.6699	0.45615	5.69745	2.98915	1.92049	1.8974	-0.797886	0.418095	2.30143	-0.878494	2.53577	0.278549
	10.2269	1.72894	2.88495	3.04842	-1.97801	5.45993	-0.575706	2.95811	2.89878	3.86373	6.52334	3.73202	0.924973	3.35396	1.85561	4.88863	2.15018	3.40653	-0.139282	4.28263	3.35384	3.22899	-0.413628	2.48107	6.31894	6.13404	12.4956	6.60341	3.37805	5.56083	2.23019		10.2269	3.30239	2.13237	1.59908	2.94686	4.77992	0.486988	5.62195	2.92553	2.02359	1.81035	-0.900158	0.371414	2.29663	-0.841003	2.56919	0.215046
	10.2372	1.57644	2.97005	3.1032	-1.79283	5.49095	-0.544735	2.84423	2.85248	3.89531	6.20672	3.60045	0.803452	3.3839	1.8768	4.81627	2.089	3.3546	-0.145145	4.47165	3.3483	3.02473	-0.442715	2.38649	6.38251	6.14212	12.6399	6.74708	3.03808	5.51417	2.12207		10.2372	3.16603	2.15231	1.69018	2.86637	4.88433	0.414089	5.38349	2.94277	2.16063	1.66525	-0.870853	0.346272	2.39882	-0.853809	2.48827	0.313168
	10.2474	1.42153	2.85376	2.93188	-1.67322	5.46451	-0.465904	2.86124	2.88917	4.00026	5.93144	3.52141	0.63303	3.32321	1.80689	4.76809	2.04539	3.30479	-0.155899	4.76162	3.37629	2.80627	-0.497028	2.33915	6.39449	6.04054	12.9057	6.89146	2.88507	5.37617	2.10209		10.2474	3.04062	2.04242	1.7629	2.80067	5.04478	0.281841	5.17215	2.93747	2.1114	1.56718	-0.983219	0.385075	2.44933	-0.861221	2.5225	0.30518
	10.2576	1.39062	2.81421	2.81371	-1.6305	5.50111	-0.325714	2.89585	2.80157	4.05783	5.64549	3.41898	0.548126	3.27148	1.78362	4.76992	1.95694	3.23812	-0.224625	4.99112	3.27435	2.72847	-0.541206	2.3171	6.50859	5.89041	13.2084	7.01813	2.87918	5.34661	2.10854		10.2576	2.86836	2.00201	1.81106	2.69462	5.1456	0.109035	5.0555	2.83356	2.0998	1.46684	-0.983814	0.42284	2.39766	-0.748722	2.49828	0.240055
	10.2679	1.21495	2.80256	2.74625	-1.49668	5.63704	-0.168987	2.76741	2.82024	4.1762	5.36194	3.29627	0.367668	3.21463	1.59595	4.70541	1.86296	3.05341	-0.226746	5.16131	3.2301	2.5971	-0.514099	2.28308	6.58143	5.8141	13.4066	7.0282	2.75652	5.27372	2.14511		10.2679	2.68898	1.98708	1.90962	2.6847	5.30321	0.0510025	5.05688	2.76966	2.18368	1.31585	-1.1002	0.38076	2.37222	-0.691708	2.56713	0.174038
	10.2781	1.0986	2.75753	2.66992	-1.32045	5.7535	-0.181301	2.66351	2.83289	4.26753	5.10384	3.3503	0.31237	3.21346	1.45918	4.65495	1.85415	2.92709	-0.0814896	5.32798	3.25963	2.44937	-0.486275	2.32755	6.61883	5.77259	13.5932	6.97003	2.60128	5.18322	2.10823		10.2781	2.67568	2.00304	2.09759	2.70364	5.43888	-0.0272102	5.1432	2.75391	2.29622	1.2877	-1.07914	0.308079	2.30468	-0.633293	2.54536	0.0663223
	10.2884	1.04795	2.69487	2.55098	-1.12997	5.78497	-0.0569191	2.59593	2.88686	4.23669	4.9523	3.2701	0.193325	3.03865	1.45954	4.53636	1.77521	2.84951	-0.161144	5.38693	3.24726	2.29681	-0.424751	2.26665	6.60243	5.68757	13.9543	6.86138	2.36666	5.09222	1.99828		10.2884	2.6936	1.81827	2.29886	2.68442	5.35876	-0.105495	5.14484	2.65223	2.22813	1.3755	-1.11572	0.248081	2.21513	-0.582809	2.55772	-0.0586357
	10.2986	0.970604	2.63097	2.43563	-1.03399	5.70094	0.0503693	2.67966	3.0342	4.06393	4.79148	3.1151	0.132946	2.87346	1.51127	4.45166	1.74717	2.71976	-0.0489197	5.53116	3.09501	2.26567	-0.398823	2.14742	6.68571	5.55479	14.2266	6.84912	2.16561	5.02521	1.93721		10.2986	2.6483	1.69316	2.37622	2.75618	5.27127	-0.304394	5.12514	2.46162	2.2404	1.32038	-1.14634	0.270515	2.27888	-0.504261	2.47527	-0.206776
	10.3088	0.834526	2.5265	2.37574	-0.911709	5.63536	0.156929	2.77273	3.1763	4.05244	4.60546	3.05811	0.00125504	2.64692	1.54143	4.40078	1.7186	2.60221	0.0529938	5.64037	2.98714	2.30746	-0.322506	2.28292	6.7446	5.2944	14.3498	6.89203	1.97937	4.86515	1.95616		10.3088	2.72307	1.6628	2.39453	2.60169	5.29917	-0.311428	5.00755	2.27676	2.26479	1.21738	-1.10942	0.389271	2.31359	-0.510735	2.33784	-0.301212
	10.3191	0.612347	2.4167	2.28714	-0.844345	5.62162	0.212448	2.65887	3.20802	4.03902	4.50461	2.90994	-0.235611	2.5043	1.48698	4.38613	1.64422	2.43399	0.17337	5.78951	2.85468	2.23045	-0.196049	2.30389	6.69672	5.17373	14.4119	6.84395	1.87086	4.62214	1.97497		10.3191	2.71058	1.64568	2.49031	2.34436	5.26603	-0.366787	4.95266	2.11664	2.38143	1.15293	-0.983234	0.383621	2.33588	-0.369343	2.22945	-0.261719
	10.3293	0.393822	2.37427	2.11641	-0.654991	5.59012	0.365833	2.52958	3.08027	4.11813	4.27563	2.77394	-0.374352	2.48785	1.4185	4.33503	1.57661	2.30793	0.201385	5.98268	2.8184	2.12286	-0.203678	2.23532	6.60377	5.10613	14.4537	6.70975	1.74995	4.39107	1.92239		10.3293	2.74562	1.70352	2.44857	2.19094	5.14665	-0.380344	5.01611	1.85238	2.36271	1.09945	-0.899525	0.373463	2.28626	-0.357872	2.2505	-0.280804
	10.3396	0.257446	2.29	1.90784	-0.545712	5.65325	0.579109	2.44418	3.05762	4.12672	3.95264	2.68763	-0.477036	2.4369	1.43877	4.23277	1.69535	2.09575	0.188248	6.15854	2.7973	1.98461	-0.136276	2.11645	6.59364	4.89933	14.3898	6.63388	1.554	4.21247	1.93394		10.3396	2.74344	1.6975	2.46019	1.96674	5.16479	-0.412876	4.88111	1.73705	2.41407	1.0555	-1.05625	0.352722	2.46785	-0.386864	2.09893	-0.288479
	10.3498	0.178673	2.13199	1.76857	-0.406239	5.70423	0.682106	2.42735	3.06623	4.06451	3.74854	2.53792	-0.536556	2.33877	1.45222	4.14306	1.79285	1.97749	0.237328	6.27475	2.79066	1.85468	-0.105698	2.16871	6.07388	4.67984	14.1791	6.55917	1.3941	4.24627	2.03095		10.3498	2.77066	1.59889	2.4817	1.84843	5.19811	-0.506313	4.71877	1.62299	2.40508	0.969093	-0.965984	0.341717	2.63272	-0.33205	1.99479	-0.242237
	10.36	0.131325	2.10945	1.67717	-0.0883179	5.71039	0.788635	2.37141	3.12111	4.09859	3.58185	2.32721	-0.709435	2.19095	1.5252	4.1106	1.91774	1.7137	0.335995	6.33548	2.74953	1.83041	-0.100754	2.27076	5.91506	4.42916	14.0981	6.31497	1.20601	4.2058	1.91523		10.36	2.80066	1.52343	2.48989	1.75618	5.17939	-0.638168	4.73117	1.49833	2.45807	0.995117	-0.928658	0.352829	2.67801	-0.310619	1.83173	-0.279491
	10.3703	0.0793839	2.10809	1.65464	0.33268	5.55333	0.947849	2.46251	3.229	4.01769	3.38893	2.18912	-0.749062	2.12819	1.52522	4.08733	1.91054	1.47658	0.312618	6.43286	2.64283	1.79955	-0.177021	2.28159	5.99413	4.2743	13.9849	5.983	1.0474	3.9086	1.85327		10.3703	2.79649	1.41645	2.50487	1.64617	5.08104	-0.774082	4.61735	1.39039	2.5147	0.975483	-0.906925	0.453049	2.67974	-0.263279	1.67379	-0.435024
	10.3805	-0.00738525	2.04058	1.70986	0.63316	5.46042	1.16284	2.39825	3.28713	3.89482	3.2767	2.16253	-0.784355	2.07959	1.43911	4.12705	1.93008	1.20293	0.356033	6.55945	2.55022	1.83427	-0.208328	2.30793	6.16963	4.0818	13.7961	5.92511	0.77869	3.66026	1.75783		10.3805	2.88928	1.32116	2.42899	1.5018	4.91967	-0.791546	4.31921	1.29321	2.43888	0.863926	-0.829453	0.478214	2.7463	-0.202232	1.57754	-0.577457
	10.3908	-0.00207138	1.85629	1.7587	0.824146	5.41401	1.31992	2.46368	3.27645	3.80515	3.22993	2.0742	-0.827393	1.88351	1.44436	4.10448	1.95606	1.02869	0.457718	6.55322	2.43087	1.78383	-0.165886	2.29767	6.24693	3.99447	13.6014	5.79366	0.603142	3.49354	1.64169		10.3908	2.97466	1.11498	2.46416	1.4603	4.70079	-0.821957	4.16138	1.18529	2.56186	0.84396	-0.716595	0.397343	2.80721	-0.0697212	1.41353	-0.659687
	10.401	0.0808868	1.64965	1.79662	1.15736	5.41729	1.56532	2.39463	3.31743	3.75917	3.20902	2.03681	-0.839554	1.70684	1.46315	4.04902	1.99626	0.887505	0.537926	6.51791	2.45636	1.74323	-0.0743256	2.23432	6.23149	3.85402	13.2723	5.52615	0.607742	3.44788	1.59299		10.401	3.00835	0.85767	2.57615	1.58413	4.45538	-0.975471	4.00233	1.0512	2.54548	0.827129	-0.778393	0.343769	2.91042	-0.0705185	1.27719	-0.673122
	10.4112	0.0952873	1.55569	1.64574	1.51	5.38743	1.77122	2.33937	3.31185	3.71661	3.09937	1.96487	-0.93026	1.78313	1.52428	4.06275	2.02581	0.802975	0.656429	6.48905	2.44804	1.72297	-0.0553589	2.24543	6.15975	3.6704	12.925	5.30944	0.599236	3.22123	1.67413		10.4112	3.05696	0.729099	2.72505	1.44191	4.2016	-0.988071	4.05138	1.10356	2.60955	0.825005	-0.867218	0.425022	2.99246	-0.0749054	1.1836	-0.74609
	10.4215	-0.0598373	1.37309	1.46814	1.73969	5.26016	1.82338	2.29798	3.244	3.68731	2.89606	1.78804	-0.968559	1.72239	1.59991	3.94952	1.98122	0.663986	0.750961	6.48167	2.36075	1.68031	0.0128174	2.34914	6.16575	3.49841	12.4958	5.11887	0.408962	2.97076	1.80325		10.4215	2.96205	0.7528	2.72731	1.36228	3.94259	-1.05665	4.032	0.99588	2.57031	0.8848	-0.743919	0.5853	3.06935	0.069458	0.974339	-0.595516
	10.4317	-0.196465	1.23822	1.36126	1.82724	5.21771	1.85698	2.26908	3.23698	3.68512	2.80656	1.76463	-1.0823	1.67093	1.71031	3.88247	2.01517	0.504677	0.777653	6.5596	2.3862	1.54299	0.0295792	2.3432	6.07697	3.41043	12.1734	4.82835	0.169937	2.80887	1.82501		10.4317	2.95963	0.765747	2.63742	1.14098	3.69093	-1.25777	3.90407	0.909893	2.48199	0.778622	-0.583321	0.649876	3.25473	0.063343	0.807339	-0.556438
	10.442	-0.252815	1.12014	1.38908	1.89319	5.10302	1.98607	2.27972	3.3077	3.55061	2.78135	1.62945	-1.05574	1.51929	1.76783	3.8826	2.06726	0.383049	0.782112	6.6044	2.43786	1.48563	0.0619812	2.296	5.90436	3.28836	11.7692	4.72268	0.0490723	2.54567	1.91046		10.442	3.04892	0.877731	2.55146	1.02474	3.54145	-1.26503	3.77437	0.674278	2.56324	0.821274	-0.473434	0.632008	3.38536	0.194519	0.806458	-0.755138
	10.4522	-0.221226	1.04422	1.38557	2.06886	4.94647	2.0953	2.21359	3.37403	3.50025	2.77888	1.44461	-1.09026	1.46448	1.84538	3.76665	2.08498	0.21489	0.839787	6.1377	2.48389	1.30477	0.0926514	2.31182	5.79968	2.98508	11.3009	4.61494	-0.0143356	2.38585	1.95135		10.4522	3.25269	0.966564	2.603	0.893444	3.39178	-1.2932	3.78849	0.500111	2.53106	0.896076	-0.462967	0.662273	3.58645	0.426357	0.71674	-0.893612
	10.4624	-0.344929	0.940041	1.23479	2.19257	4.8106	2.32072	2.2178	3.48016	3.40086	2.68206	1.21027	-0.929424	1.38307	1.94079	3.76038	2.16064	0.0330353	0.89785	5.83075	2.35686	1.26052	0.0707169	2.36026	5.58077	2.79016	10.7484	4.41826	-0.11496	2.20296	1.99198		10.4624	3.3645	0.949722	2.64782	0.706692	3.2689	-1.30285	3.79351	0.368946	2.45667	0.936646	-0.41576	0.732426	3.60716	0.558441	0.539177	-0.774902
	10.4727	-0.450249	0.815586	1.06711	2.28796	4.73563	2.49903	2.05675	3.47642	3.33552	2.56856	1.11672	-0.917217	1.26288	2.04933	3.71993	2.18015	-0.166054	1.00135	5.94918	2.30948	1.21143	0.0610275	2.43056	5.47842	2.63241	10.3333	4.03526	-0.16758	2.04266	2.15788		10.4727	3.41995	0.956696	2.64174	0.65517	3.0366	-1.33529	3.70923	0.267811	2.45654	0.905102	-0.418217	0.695316	3.684	0.623219	0.317699	-0.702877
	10.4829	-0.443348	0.706295	1.04512	2.4744	4.72191	2.60133	2.00451	3.4552	3.36958	2.57808	1.01149	-1.02492	1.18311	2.06117	3.84708	2.16734	-0.297161	1.06461	6.07841	2.30621	1.25365	0.176109	2.28503	5.24695	2.53893	9.91183	3.69408	-0.218819	1.93527	2.21299		10.4829	3.48348	0.862949	2.62726	0.603863	2.89742	-1.44573	3.69326	0.157551	2.41655	0.899227	-0.375431	0.651089	3.83813	0.674301	0.294548	-0.75676
	10.4932	-0.552414	0.653484	1.04455	2.70414	4.69141	2.78491	2.01222	3.45168	3.40497	2.65	0.895706	-1.08644	1.22853	2.15273	3.83154	2.15176	-0.461395	1.11723	5.98923	2.29348	1.2773	0.306931	2.19213	5.06673	2.3628	9.43263	3.44562	-0.261551	1.88377	2.28246		10.4932	3.79891	0.797432	2.51862	0.533741	2.67904	-1.49598	3.57264	0.122005	2.32542	0.76582	-0.310131	0.593536	3.99107	0.848549	0.271122	-0.809639
	10.5034	-0.660942	0.501289	0.949043	2.93689	4.61094	2.85267	1.98691	3.38129	3.43863	2.73024	0.759117	-1.23406	1.14401	2.30481	3.7766	2.17146	-0.549835	1.18313	5.91727	2.36618	1.1973	0.414734	2.06353	5.04293	2.24551	8.88529	3.17697	-0.277657	1.8022	2.36275		10.5034	4.00243	0.753922	2.3996	0.492912	2.44323	-1.51384	3.4365	0.0745583	2.30332	0.645451	-0.195034	0.568501	4.13079	1.02053	0.123196	-0.792843
	10.5136	-0.693474	0.339428	0.915009	3.14254	4.60496	2.97635	1.94128	3.26143	3.26382	2.70176	0.710384	-1.16095	1.03996	2.33804	3.74298	2.2329	-0.693913	1.25327	5.79034	2.42012	1.19703	0.430061	2.03853	4.99781	2.09684	8.40584	2.95344	-0.318165	1.72563	2.34831		10.5136	4.03428	0.668175	2.41594	0.320679	2.27491	-1.49601	3.36522	-0.0609474	2.19952	0.582508	-0.124962	0.613338	4.07876	1.14015	-0.0509224	-0.890881
	10.5239	-0.747734	0.17115	0.801888	3.3829	4.6427	3.08286	1.93044	3.04612	3.18959	2.73634	0.765755	-1.27091	0.878826	2.50018	3.70894	2.27623	-0.762329	1.34143	5.66788	2.50359	1.08495	0.480667	2.10088	4.91238	1.90676	7.89403	2.7455	-0.374981	1.56869	2.24469		10.5239	4.12292	0.556751	2.4741	0.30275	2.16679	-1.4869	3.36235	-0.0852394	2.11565	0.669556	-0.0250053	0.582142	4.09076	1.28547	-0.155552	-0.922779
	10.5341	-0.716644	0.0882645	0.740211	3.43929	4.57787	3.13808	1.91877	2.87643	3.06733	2.63482	0.751987	-1.32453	0.77354	2.64622	3.77808	2.3287	-0.995049	1.41187	5.46152	2.63771	0.988857	0.41589	2.05852	4.66566	1.72248	7.45557	2.64291	-0.332291	1.44215	2.18776		10.5341	4.17282	0.586002	2.38007	0.317318	1.99618	-1.54419	3.37378	-0.155239	2.02765	0.657841	0.138039	0.533051	4.04587	1.33419	-0.196701	-0.953323
	10.5444	-0.643429	0.119499	0.716022	3.4244	4.47852	3.21689	1.95441	2.86172	3.07035	2.61427	0.720387	-1.31182	0.697891	2.85355	3.7967	2.28631	-1.05524	1.49489	5.2929	2.60674	0.948479	0.400009	2.08852	4.56256	1.56334	7.03744	2.46851	-0.373192	1.25277	2.10638		10.5444	4.13177	0.616413	2.30452	0.278549	1.81578	-1.45792	3.33427	-0.30537	1.9983	0.529152	0.154202	0.463825	4.05995	1.3971	-0.374718	-1.00068
	10.5546	-0.473305	0.1231	0.690487	3.57247	4.36281	3.23289	1.96253	2.89236	2.93483	2.55032	0.569801	-1.22668	0.585011	2.9404	3.72627	2.16766	-1.09374	1.48907	5.29174	2.70044	0.944164	0.389259	2.0505	4.392	1.39709	6.63939	2.31618	-0.43256	1.11069	2.13825		10.5546	4.05748	0.698383	2.25659	0.204342	1.65179	-1.4971	3.33669	-0.350384	1.93288	0.54665	0.184017	0.532417	4.05192	1.53771	-0.321789	-0.897961
	10.5648	-0.385529	0.20837	0.622978	3.5083	4.14732	3.34894	1.91095	2.83164	2.82732	2.49277	0.472885	-1.19646	0.479836	3.06807	3.62565	2.09569	-1.1409	1.60443	5.18047	2.85685	0.977081	0.338593	2.07977	4.1231	1.18404	6.18896	2.05264	-0.433144	1.10462	2.08075		10.5648	4.15741	0.78302	2.19092	0.136345	1.42644	-1.4598	3.17903	-0.427525	1.87072	0.652332	0.276203	0.625317	3.97834	1.80416	-0.378307	-0.951546
	10.5751	-0.500782	0.174477	0.526291	3.63052	3.96628	3.39249	1.94583	2.85176	2.7205	2.48861	0.408211	-1.21196	0.448479	3.07343	3.62265	1.98641	-1.14493	1.59438	4.87805	2.95905	1.01594	0.340897	1.99461	3.99936	1.00201	5.81247	1.80074	-0.372452	1.06964	1.99634		10.5751	4.27038	0.853592	2.10495	0.1236	1.21773	-1.40503	3.09013	-0.598042	1.84433	0.725037	0.295513	0.765007	3.97126	2.02433	-0.56303	-0.979847
	10.5853	-0.558052	0.127747	0.495857	3.81157	3.86775	3.31187	1.91837	2.90171	2.65259	2.49049	0.420715	-1.22357	0.423294	3.05096	3.69478	1.95063	-1.2561	1.45909	4.57512	2.99947	0.952866	0.347	1.9253	3.94216	0.866035	5.48308	1.4418	-0.339302	0.987572	1.81455		10.5853	4.45113	0.833542	2.08753	0.0268745	1.04056	-1.49862	3.11871	-0.658207	1.7622	0.797112	0.296097	0.766701	3.95034	2.24464	-0.684818	-0.990101
	10.5956	-0.572212	0.113014	0.407021	3.86356	3.78062	3.36975	1.8855	2.92517	2.6517	2.54901	0.457054	-1.27778	0.399689	3.08848	3.74414	1.8287	-1.50373	1.5014	4.33087	3.05156	0.896126	0.408249	1.89986	3.81397	0.750927	4.97594	1.1822	-0.329765	0.910919	1.63738		10.5956	4.43298	0.902218	2.14273	0.00548935	0.904377	-1.59586	3.0683	-0.61441	1.54882	0.823704	0.399559	0.644939	3.86436	2.22696	-0.81398	-1.08232
	10.6058	-0.541443	0.10796	0.434998	4.02568	3.70441	3.44238	1.75746	2.85248	2.54757	2.58533	0.508659	-1.28442	0.256649	3.08441	3.54129	1.76877	-1.59948	1.60807	4.0769	3.04116	0.965481	0.275818	1.86483	3.64211	0.720791	4.63354	0.85619	-0.28965	0.956589	1.54453		10.6058	4.45221	0.992794	2.20049	-0.112553	0.808769	-1.77917	2.94332	-0.622314	1.33583	0.769421	0.46645	0.517826	3.75975	2.19639	-0.929981	-1.13559
	10.616	-0.642441	0.102776	0.449734	4.1869	3.5617	3.35699	1.75988	2.74357	2.40767	2.57724	0.414589	-1.19753	0.119297	3.12695	3.44206	1.69788	-1.72518	1.72463	3.88755	3.01911	1.08424	0.267879	1.78343	3.53191	0.567856	4.31419	0.57066	-0.318798	0.963131	1.53823		10.616	4.52772	1.04572	2.13861	-0.206585	0.594372	-1.76497	2.87473	-0.747746	1.36977	0.721222	0.52177	0.465851	3.55347	2.20678	-1.05111	-1.1176
	10.6263	-0.765366	0.0770111	0.45195	4.33011	3.39319	3.14639	1.66003	2.70255	2.40516	2.64366	0.396172	-1.17607	0.0739746	3.08299	3.30867	1.55706	-1.74174	1.68771	3.59141	3.23901	1.22358	0.328568	1.66615	3.41785	0.432579	3.91895	0.453751	-0.394054	0.932091	1.57124		10.6263	4.47541	1.01266	2.25917	-0.199276	0.289158	-1.94506	2.87538	-0.834126	1.2525	0.613232	0.553459	0.451084	3.39658	2.40866	-1.14409	-1.03095
	10.6365	-0.65057	-0.0878906	0.473385	4.41006	3.14754	3.00413	1.5227	2.58532	2.40057	2.72113	0.337425	-1.1923	0.0413094	3.06378	3.22348	1.52826	-1.91473	1.65521	3.3793	3.41121	1.38757	0.369591	1.57679	3.25898	0.399689	3.59798	0.407639	-0.298782	0.935665	1.59747		10.6365	4.45524	0.924809	2.3606	-0.270649	0.147884	-2.15421	2.72232	-0.719292	1.13955	0.653416	0.588055	0.385361	3.23433	2.5613	-1.21415	-1.11229
	10.6468	-0.539337	-0.145622	0.426083	4.46871	3.10166	2.98603	1.47456	2.58838	2.35894	2.78172	0.33062	-1.25627	-0.0125961	3.12504	3.13069	1.43332	-1.98611	1.71433	3.18463	3.55127	1.54485	0.319664	1.37337	3.14394	0.219002	3.27588	0.244263	-0.207291	0.962608	1.467		10.6468	4.39857	0.873203	2.38001	-0.30666	0.107571	-2.22062	2.62818	-0.607571	1.09963	0.717075	0.645119	0.359886	3.09054	2.68542	-1.13376	-1.02876
	10.657	-0.424629	-0.272209	0.339249	4.50899	3.07779	3.00349	1.40514	2.56781	2.28223	2.85182	0.330032	-1.28686	-0.119339	3.10028	3.08638	1.34809	-1.92654	1.68142	2.9689	3.6671	1.63446	0.304955	1.27062	2.99502	0.174885	2.91758	-0.0464859	-0.080246	0.823502	1.42514		10.657	4.32598	0.82156	2.38431	-0.332157	-0.0222397	-2.13288	2.60027	-0.616749	1.14498	0.624233	0.728123	0.352291	2.82852	2.82673	-1.13939	-1.02161
	10.6672	-0.442451	-0.270515	0.297943	4.4303	2.91656	3.00346	1.29987	2.53007	2.22501	2.83835	0.253002	-1.23788	-0.198395	3.04585	3.03618	1.20947	-1.91842	1.73766	2.84534	3.6989	1.81624	0.359085	1.17672	2.80032	0.034584	2.64402	-0.284607	-0.210327	0.740067	1.42906		10.6672	4.22403	0.801319	2.48526	-0.392204	-0.135345	-2.22087	2.61394	-0.529057	1.07542	0.538033	0.808876	0.239201	2.67279	2.90047	-1.22206	-0.980778
	10.6775	-0.394104	-0.130459	0.0891953	4.32357	2.79266	2.9918	1.23087	2.46458	2.21945	2.8618	0.211281	-1.23821	-0.296982	3.01299	3.00846	1.10316	-1.91749	1.72022	2.73745	3.80386	1.87966	0.42025	1.16286	2.68348	-0.0681	2.42564	-0.516293	-0.328526	0.701229	1.38821		10.6775	4.17336	0.873569	2.64878	-0.487072	-0.275608	-2.34851	2.61258	-0.435047	0.922009	0.484127	0.770813	0.257412	2.63336	2.9449	-1.3091	-0.93866
	10.6877	-0.270149	-0.153133	-0.0505295	4.26181	2.74095	2.98613	1.19719	2.34264	2.11982	2.88228	0.21209	-1.24832	-0.337288	3.02059	2.944	0.966076	-1.83905	1.64553	2.47734	3.91972	1.9468	0.502113	1.13741	2.53357	-0.165779	2.16212	-0.662575	-0.283703	0.660255	1.21762		10.6877	4.11505	1.05771	2.81237	-0.485989	-0.390297	-2.36391	2.53494	-0.300831	0.691502	0.413757	0.760563	0.239986	2.54295	3.02455	-1.4915	-0.822468
	10.698	-0.126801	-0.159367	-0.102062	4.27147	2.69549	3.00397	1.18299	2.38663	1.98116	2.90784	0.315491	-1.33278	-0.359482	3.03252	2.85458	0.960186	-1.97632	1.58199	2.25578	3.97099	2.04893	0.579361	0.964478	2.42327	-0.255093	1.93092	-0.827347	-0.247116	0.671963	1.15877		10.698	3.8246	1.17773	2.92019	-0.438313	-0.366978	-2.38086	2.41306	-0.273602	0.622875	0.389915	0.795967	0.297375	2.48534	3.13998	-1.52409	-0.884121
	10.7082	-0.00495529	-0.166126	-0.141903	4.24744	2.53168	2.93205	1.15762	2.26733	1.84433	2.91544	0.237267	-1.26978	-0.41568	3.02991	2.67382	0.847366	-2.00053	1.61641	2.04076	3.91895	2.17757	0.63179	0.833431	2.30631	-0.244972	1.84417	-1.1096	-0.385258	0.766926	1.10966		10.7082	3.34095	1.24157	3.01773	-0.455315	-0.50798	-2.41826	2.21824	-0.207523	0.641933	0.469021	0.833302	0.285526	2.34121	3.16085	-1.48209	-0.905628
	10.7184	0.081604	-0.291748	-0.248093	4.19586	2.37782	2.76858	1.15665	2.23823	1.77151	2.98779	0.238281	-1.41083	-0.597603	2.95105	2.48566	0.729565	-2.02028	1.66144	1.81651	3.87931	2.36948	0.624161	0.753002	2.12582	-0.211174	1.7653	-1.24272	-0.58007	0.785507	1.01718		10.7184	3.2414	1.29449	3.03382	-0.499722	-0.699181	-2.46442	2.00615	-0.119289	0.536793	0.448269	0.866192	0.101311	2.16835	3.28209	-1.57457	-0.831276
	10.7287	0.143532	-0.558708	-0.333244	4.13642	2.24092	2.76976	1.03264	2.28217	1.59754	2.97813	0.226143	-1.36312	-0.795052	2.91253	2.37975	0.629322	-1.97012	1.67112	1.60333	3.90835	2.56786	0.716785	0.631012	2.11828	-0.211975	1.76643	-1.4149	-0.618275	0.798172	0.993484		10.7287	3.10395	1.29634	3.05896	-0.38559	-0.723156	-2.40029	1.97447	0.0851212	0.362354	0.466125	0.959057	0.0923805	1.89337	3.24442	-1.51967	-0.930267
	10.7389	0.114182	-0.658653	-0.290081	4.06985	2.16176	2.68748	0.976971	2.18285	1.59487	2.92949	0.336948	-1.29641	-0.89769	2.8137	2.29784	0.543335	-2.00353	1.70668	1.32351	3.87595	2.73026	0.901119	0.517635	2.02665	-0.250671	1.72669	-1.47813	-0.678406	0.892845	0.925747		10.7389	3.16576	1.30161	3.16167	-0.420135	-0.765854	-2.50234	1.99134	0.187046	0.413044	0.444309	0.998741	0.00429916	1.724	3.32874	-1.5152	-0.965961
	10.7492	0.201015	-0.787899	-0.208492	4.04192	1.95457	2.7157	0.795677	2.01743	1.56936	2.87708	0.402668	-1.2914	-0.966831	2.63335	2.18474	0.341896	-2.07073	1.70258	1.12188	3.87091	2.88663	1.03278	0.427643	1.92664	-0.354595	1.59747	-1.55184	-0.749371	0.956215	0.932755		10.7492	3.10764	1.25906	3.27085	-0.478825	-0.875969	-2.5835	2.09951	0.209873	0.49321	0.344845	1.08313	-0.105579	1.69555	3.4305	-1.52826	-0.928135
	10.7594	0.317661	-0.8573	-0.299091	4.01419	1.87067	2.57279	0.763847	1.92867	1.53293	2.8672	0.472549	-1.36217	-1.00787	2.51252	2.04868	0.0398903	-2.1553	1.69043	0.841217	3.88824	2.93282	1.11694	0.284939	1.87446	-0.428864	1.38635	-1.66177	-0.817429	0.981514	0.758972		10.7594	3.05098	1.29583	3.36816	-0.524792	-1.02612	-2.48937	2.04739	0.192448	0.601822	0.178986	1.11444	-0.123791	1.62534	3.49156	-1.48224	-0.815395
	10.7696	0.49551	-0.87368	-0.394794	4.09534	1.73682	2.49287	0.634529	1.87705	1.51141	2.83408	0.485722	-1.23565	-1.13939	2.44711	1.97478	-0.0771599	-2.18545	1.71708	0.748329	3.88181	3.02241	1.23494	0.0899353	1.82567	-0.499863	1.24288	-1.73767	-0.828907	0.920895	0.622562		10.7696	2.98042	1.29776	3.44134	-0.510342	-1.07779	-2.30584	1.93416	0.269466	0.504154	0.169342	1.2902	-0.0556908	1.27604	3.56713	-1.47152	-0.589733
	10.7799	0.622337	-0.826797	-0.48016	4.03638	1.60615	2.4852	0.573269	1.86777	1.42365	2.86403	0.586727	-1.15247	-1.19103	2.34666	1.79063	-0.137589	-2.25271	1.81095	0.608543	3.81272	3.10554	1.26503	-0.00583649	1.84988	-0.481468	1.15607	-1.89091	-0.889954	0.903133	0.566811		10.7799	2.84244	1.37115	3.54916	-0.450787	-1.12347	-2.33376	1.7767	0.323944	0.394493	0.0712204	1.35566	0.0037117	1.02666	3.61385	-1.40763	-0.431175
	10.7901	0.557068	-1.0037	-0.591549	3.96469	1.53863	2.44557	0.443878	1.71998	1.33466	2.89673	0.590351	-1.15094	-1.179	2.23568	1.67406	-0.270721	-2.26717	1.80606	0.4347	3.7044	3.12909	1.38691	-0.0749435	1.74586	-0.470299	1.0641	-1.94754	-0.932617	0.925117	0.569622		10.7901	2.71291	1.42397	3.70445	-0.519508	-1.22151	-2.25839	1.49474	0.39304	0.290615	0.0265884	1.32996	-0.0820961	0.768417	3.61444	-1.38043	-0.4734
	10.8004	0.584023	-1.19989	-0.712307	3.82197	1.48056	2.26651	0.355568	1.70522	1.35926	2.86683	0.689224	-1.1597	-1.14278	2.06046	1.49223	-0.460133	-2.23306	1.63729	0.281422	3.69107	3.31786	1.49773	-0.0721169	1.60978	-0.659069	0.893524	-2.00198	-1.01641	1.0104	0.582458		10.8004	2.49527	1.39839	3.84907	-0.535362	-1.42044	-2.38158	1.33167	0.4939	0.174458	0.027626	1.24744	-0.0913811	0.51524	3.58798	-1.34492	-0.536922
	10.8106	0.644936	-1.42113	-0.724682	3.72134	1.30194	2.13988	0.277298	1.63691	1.337	2.79419	0.794739	-1.13451	-1.18508	1.98939	1.33863	-0.560432	-2.26323	1.50271	0.200623	3.68225	3.47975	1.60693	-0.225121	1.51842	-0.76432	0.736908	-1.97489	-1.04751	1.14099	0.610306		10.8106	2.21042	1.41368	3.88025	-0.491817	-1.59932	-2.37741	1.39758	0.514118	0.0841331	-0.0783882	1.16729	-0.228008	0.388866	3.50282	-1.19336	-0.460438
	10.8208	0.759369	-1.52173	-0.831768	3.62928	1.14303	2.02914	0.197044	1.62871	1.30996	2.74878	0.790718	-1.1217	-1.19564	1.92286	1.2514	-0.673374	-2.35389	1.49353	0.0704803	3.64329	3.62478	1.68383	-0.47588	1.46957	-0.706478	0.627163	-1.95776	-1.19474	1.11664	0.57135		10.8208	2.05253	1.44242	3.95166	-0.530739	-1.66365	-2.37429	1.54441	0.490292	-0.016468	-0.131149	1.22358	-0.263161	0.297443	3.49105	-1.22058	-0.278778
	10.8311	0.875107	-1.62859	-1.00432	3.52942	1.09654	1.95655	0.183716	1.44492	1.22245	2.71794	0.821449	-1.13191	-1.26897	1.79541	1.0592	-0.712257	-2.36707	1.52864	-0.00283432	3.55312	3.64851	1.72553	-0.752613	1.36748	-0.763649	0.635056	-2.01031	-1.17409	1.16073	0.553764		10.8311	1.97917	1.41748	3.98853	-0.429375	-1.72413	-2.36695	1.33551	0.50182	-0.0241203	-0.145405	1.24141	-0.350601	-0.00411987	3.426	-1.18917	-0.252838
	10.8413	0.842838	-1.63498	-1.11282	3.60628	1.02863	1.97942	0.157585	1.38008	1.18373	2.5855	0.973919	-1.09868	-1.32224	1.71279	1.06332	-0.920494	-2.37314	1.42542	-0.0910606	3.42884	3.71192	1.78538	-0.888844	1.30002	-0.804382	0.541443	-2.02688	-1.20245	1.13701	0.478653		10.8413	1.71025	1.46014	4.0957	-0.298054	-1.7832	-2.55216	1.11526	0.588985	-0.107807	-0.286072	1.3205	-0.438946	-0.350708	3.3855	-1.1156	-0.324852
	10.8516	0.914471	-1.65292	-1.09521	3.65693	0.936394	1.96913	0.121132	1.32848	1.1991	2.47406	1.05532	-1.14699	-1.34776	1.6286	0.950638	-0.915215	-2.28455	1.43641	-0.214249	3.27565	3.81224	1.80879	-0.997444	1.3406	-0.903496	0.504784	-1.9817	-1.26627	1.14875	0.426262		10.8516	1.58825	1.49207	4.15761	-0.24752	-1.80617	-2.54298	1.08115	0.6334	-0.190289	-0.271542	1.38266	-0.498089	-0.517376	3.18199	-1.13079	-0.337986
	10.8618	0.893429	-1.61351	-1.11974	3.66096	0.826935	2.00085	0.122276	1.14629	1.1445	2.38481	1.06992	-1.12226	-1.33261	1.56476	0.72773	-1.00728	-2.36847	1.34909	-0.429329	3.11966	3.9831	1.77798	-1.19833	1.30333	-0.943993	0.338226	-1.98773	-1.25521	1.17712	0.425354		10.8618	1.4701	1.43313	4.19987	-0.221317	-1.93163	-2.62811	1.05387	0.649197	-0.284176	-0.343235	1.39609	-0.472897	-0.629158	3.04239	-1.09828	-0.228851
	10.872	0.99638	-1.7158	-1.19012	3.61158	0.831966	1.9134	0.061409	1.00048	1.13692	2.31471	1.12412	-1.14771	-1.30022	1.55125	0.562996	-1.10709	-2.37408	1.29998	-0.59008	2.98187	4.04964	1.69777	-1.39086	1.30358	-1.00156	0.346642	-2.04123	-1.27512	1.10988	0.427082		10.872	1.30077	1.4486	4.1587	-0.196129	-1.98229	-2.59015	0.954193	0.609249	-0.377792	-0.554592	1.54792	-0.509697	-0.79567	3.03846	-1.23981	-0.25845
	10.8823	1.09766	-1.74086	-1.14994	3.5262	0.650387	1.90418	0.0345993	0.909237	1.15499	2.24264	1.19411	-1.14537	-1.37846	1.4985	0.372368	-1.04884	-2.28637	1.34399	-0.648888	2.88527	4.12729	1.76639	-1.44064	1.35178	-1.04877	0.311962	-2.12563	-1.37057	1.16187	0.368896		10.8823	1.12976	1.60343	4.01855	-0.0349846	-1.98312	-2.55858	0.784378	0.667435	-0.420635	-0.707466	1.47917	-0.551136	-0.923916	2.98565	-1.32168	-0.238056
	10.8925	1.12463	-1.70304	-1.20107	3.34948	0.568321	1.81092	-0.0433044	0.771645	1.17273	2.17834	1.19651	-1.05613	-1.34988	1.39491	0.287582	-0.990314	-2.32462	1.34921	-0.741135	2.84635	4.08658	1.72205	-1.52616	1.45606	-1.22289	0.19286	-2.1038	-1.45435	1.19666	0.3578		10.8925	1.0012	1.64037	3.94843	-0.0757179	-2.12606	-2.45009	0.666958	0.74728	-0.588802	-0.785381	1.50106	-0.716488	-1.11403	2.8673	-1.39542	-0.215752
	10.9028	1.26155	-1.70785	-1.19691	3.23176	0.623444	1.75225	-0.209255	0.613884	1.23272	2.18658	1.17944	-1.16566	-1.34538	1.32865	0.106541	-0.979717	-2.32075	1.34719	-0.923416	2.84287	3.96481	1.65824	-1.59369	1.53022	-1.23146	0.150993	-2.05791	-1.46874	1.18299	0.429813		10.9028	0.736027	1.57481	3.92688	0.0932503	-2.20562	-2.41167	0.642639	0.79493	-0.683445	-0.872883	1.43096	-0.774471	-1.22629	2.79462	-1.42791	-0.228603
	10.913	1.35144	-1.69624	-1.25734	3.15031	0.494114	1.71065	-0.447891	0.42923	1.13485	2.07321	1.27482	-1.17449	-1.33291	1.14642	-0.100441	-0.937923	-2.22152	1.45252	-1.02131	2.75512	3.85491	1.65313	-1.60615	1.57277	-1.29654	0.102379	-1.94538	-1.56997	1.2122	0.365189		10.913	0.512367	1.5528	3.90478	0.280293	-2.30029	-2.38268	0.577408	0.916164	-0.821083	-0.982899	1.41714	-0.937458	-1.33348	2.63992	-1.4041	-0.169891
	10.9232	1.47988	-1.70233	-1.31554	3.11605	0.385719	1.67085	-0.548168	0.314095	1.05522	2.0521	1.31896	-1.17024	-1.43435	1.0023	-0.0433159	-0.867218	-2.23441	1.47602	-1.07098	2.58096	3.81412	1.66891	-1.69772	1.58694	-1.26038	0.0531845	-1.95222	-1.57891	1.17231	0.320023		10.9232	0.397663	1.63894	3.79344	0.571842	-2.24096	-2.26981	0.569958	0.811081	-0.799328	-1.01259	1.35831	-0.91539	-1.46719	2.62608	-1.3625	-0.133518
	10.9335	1.44461	-1.7374	-1.215	3.05322	0.245396	1.63898	-0.602264	0.451721	0.941696	1.92204	1.36896	-1.17371	-1.38013	0.834541	-0.0555344	-0.839958	-2.20261	1.54514	-1.13653	2.46146	3.74793	1.76373	-1.70214	1.52808	-1.24312	0.0928345	-1.87131	-1.51944	1.25846	0.297813		10.9335	0.267796	1.73754	3.76648	0.719196	-2.24512	-2.21807	0.557522	0.755604	-1.0288	-0.961941	1.38063	-0.956936	-1.54582	2.61592	-1.21186	-0.0937042
	10.9437	1.40473	-1.85158	-1.46541	3.01812	0.212948	1.66594	-0.669868	0.379318	0.913074	1.89899	1.37655	-1.16803	-1.32911	0.733295	-0.274429	-0.79467	-2.2128	1.61326	-1.2967	2.24293	3.65191	1.77582	-1.73732	1.47381	-1.27593	0.0446129	-1.85203	-1.61148	1.26436	0.271313		10.9437	-0.0148239	1.65511	3.59693	0.851353	-2.24958	-2.25607	0.481098	0.747055	-1.08747	-1.02293	1.40722	-1.06313	-1.74722	2.6181	-1.17237	-0.10603
	10.954	1.35222	-1.98091	-1.92058	2.9568	0.147026	1.61501	-0.733826	0.192158	0.926903	1.86793	1.36606	-1.18903	-1.22092	0.667816	-0.434547	-0.820728	-2.16144	1.60935	-1.39623	2.13858	3.50224	1.80243	-1.84812	1.49253	-1.41481	0.020462	-1.8605	-1.60524	1.32101	0.147858		10.954	-0.128727	1.5977	3.42942	0.86755	-2.30308	-2.2146	0.459831	0.67337	-1.04046	-1.12544	1.45139	-1.11321	-1.94318	2.49719	-1.20205	-0.163788
	10.9642	1.34421	-2.13904	-2.04129	2.90809	0.0124741	1.44692	-0.717468	0.0296021	0.934357	1.8616	1.30659	-1.2494	-1.15362	0.595299	-0.453133	-0.74279	-2.06053	1.65629	-1.52394	2.01292	3.31575	1.64898	-1.94779	1.48243	-1.53563	-0.121792	-1.78549	-1.67377	1.27292	0.0904846		10.9642	-0.155537	1.58219	3.25595	0.895161	-2.35544	-2.0437	0.418575	0.670654	-1.03196	-1.19253	1.45378	-1.05818	-2.19379	2.21353	-1.04068	-0.231831
	10.9744	1.4034	-2.19257	-1.90667	2.79092	-0.0128326	1.34386	-0.644215	-0.0017128	0.966385	1.85741	1.33081	-1.34246	-1.07912	0.556625	-0.430317	-0.661606	-1.92414	1.74249	-1.49957	1.88042	3.2804	1.62775	-2.05354	1.49035	-1.56239	-0.16013	-1.76481	-1.6029	1.26978	-0.0397873		10.9744	-0.250023	1.64861	3.21037	1.02076	-2.49828	-1.96958	0.477295	0.574379	-0.91972	-1.25166	1.47697	-1.04599	-2.34661	2.04713	-0.887005	-0.223454
	10.9847	1.47505	-2.13582	-1.82018	2.74771	-0.103065	1.30236	-0.659904	0.0128555	0.946133	1.69219	1.38532	-1.52227	-1.13012	0.471977	-0.577625	-0.578064	-1.90937	1.71523	-1.47118	1.83458	3.25033	1.67159	-1.93217	1.52749	-1.57206	-0.198967	-1.72096	-1.57587	1.19759	-0.056942		10.9847	-0.465092	1.70917	3.04021	1.09798	-2.64149	-1.82052	0.530605	0.500565	-1.01776	-1.28363	1.50123	-1.12946	-2.46304	1.93072	-0.730984	-0.279888
	10.9949	1.54864	-2.00247	-1.77216	2.69037	-0.0438538	1.13207	-0.792252	0.117615	0.809315	1.55957	1.52675	-1.53638	-1.10059	0.384666	-0.708252	-0.457569	-1.94239	1.7316	-1.50866	1.72385	3.12135	1.66748	-1.9628	1.5421	-1.63812	-0.133629	-1.57059	-1.54089	1.21688	-0.0754089		10.9949	-0.552147	1.83529	2.90727	1.10891	-2.68326	-1.67031	0.455696	0.444431	-1.09627	-1.36626	1.43962	-1.14225	-2.52737	1.7729	-0.724606	-0.323517
	11.0052	1.56918	-1.98276	-1.64783	2.52047	0.114254	1.00146	-0.842175	0.00463104	0.810818	1.3886	1.72766	-1.4683	-1.0901	0.306801	-0.87368	-0.358543	-1.95089	1.78831	-1.4283	1.44488	2.96404	1.65397	-2.12546	1.62639	-1.78902	-0.136253	-1.38864	-1.51219	1.20642	-0.0781746		11.0052	-0.633472	2.06379	2.83993	1.30574	-2.74145	-1.59922	0.358585	0.462479	-1.15724	-1.42065	1.45082	-1.13354	-2.55768	1.58451	-0.676483	-0.300793
	11.0154	1.52524	-2.06796	-1.61821	2.35519	0.0776901	0.91552	-1.00975	-0.0827179	0.803463	1.30878	1.58704	-1.44328	-1.08199	0.106518	-0.99691	-0.24514	-1.90962	1.79678	-1.4803	1.35691	2.7385	1.62183	-2.24359	1.59083	-1.87882	-0.160763	-1.34052	-1.35178	1.24375	-0.141678		11.0154	-0.655277	2.05424	2.78776	1.52307	-2.73203	-1.53289	0.294846	0.424854	-1.06999	-1.48011	1.55422	-1.21654	-2.66776	1.49029	-0.650089	-0.356716
	11.0256	1.51549	-2.0584	-1.60773	2.2967	0.0154533	0.84267	-0.957127	-0.167137	0.854362	1.24942	1.56136	-1.47402	-1.04184	-0.0463676	-1.06474	-0.200127	-1.91645	1.81779	-1.43309	1.32874	2.58291	1.58411	-2.31462	1.52979	-1.95947	-0.0774345	-1.35801	-1.27245	1.23338	-0.20158		11.0256	-0.824017	2.07829	2.60168	1.69258	-2.68714	-1.48288	0.196079	0.551601	-0.963383	-1.53343	1.65018	-1.2556	-2.67984	1.48114	-0.597317	-0.467712
	11.0359	1.46101	-2.02802	-1.54403	2.25993	-0.0887947	0.743847	-0.948662	-0.196812	0.737396	1.17873	1.45905	-1.4854	-1.06142	-0.160797	-1.0465	-0.15274	-2.00582	1.86629	-1.37031	1.29133	2.42867	1.48802	-2.41146	1.52322	-2.07767	-0.0797119	-1.34122	-1.37896	1.14692	-0.232418		11.0359	-0.960464	1.97446	2.37838	1.84723	-2.62269	-1.36365	0.159817	0.620121	-0.883537	-1.49652	1.68155	-1.26069	-2.78172	1.4424	-0.433083	-0.556416
	11.0461	1.43597	-2.06946	-1.54137	2.21582	-0.100166	0.704006	-0.890022	-0.297661	0.668648	1.26872	1.47898	-1.41363	-0.939056	-0.222916	-1.16056	-0.0513153	-1.99244	1.80079	-1.33057	1.26932	2.42162	1.55449	-2.42487	1.31532	-2.15147	-0.0890198	-1.26634	-1.41759	1.08593	-0.260899		11.0461	-1.0066	1.89859	2.18411	1.97316	-2.61737	-1.19133	0.112003	0.527088	-0.885231	-1.44504	1.67298	-1.22302	-2.85468	1.34895	-0.24329	-0.60181
	11.0564	1.46155	-2.09505	-1.49206	2.07552	-0.0897369	0.674942	-0.814064	-0.416618	0.599949	1.17237	1.56696	-1.46541	-0.813133	-0.37796	-1.28854	0.108902	-1.95889	1.71612	-1.17218	1.1463	2.3518	1.53422	-2.46861	1.21565	-2.22997	-0.186485	-1.32465	-1.37146	1.05425	-0.301216		11.0564	-0.906162	1.89138	2.10219	2.17728	-2.6339	-1.08479	0.0764046	0.334827	-0.882252	-1.49779	1.60016	-1.10932	-2.84721	1.11648	-0.137192	-0.626976
	11.0666	1.47079	-2.06804	-1.40097	2.0202	0.00669098	0.67469	-0.869781	-0.456402	0.523201	1.06283	1.52536	-1.48886	-0.72567	-0.450096	-1.34061	0.192993	-2.03442	1.73542	-1.10955	1.00973	2.24152	1.49512	-2.60344	1.14581	-2.39691	-0.255306	-1.3073	-1.30007	1.05917	-0.391003		11.0666	-0.993923	1.98924	1.97395	2.30607	-2.76434	-1.02151	0.0479279	0.263577	-0.828747	-1.43817	1.58729	-1.11107	-2.88239	0.827976	-0.058239	-0.661785
	11.0768	1.49055	-2.14592	-1.43804	1.88852	0.0331078	0.619999	-0.913841	-0.521797	0.461796	0.931923	1.44741	-1.56194	-0.706596	-0.565502	-1.46447	0.333229	-1.99643	1.68674	-1.03313	0.815071	2.11604	1.3815	-2.6987	1.07234	-2.46066	-0.394508	-1.33923	-1.16332	1.19882	-0.4716		11.0768	-1.17921	2.06599	1.76061	2.2986	-2.60592	-0.964741	0.262074	0.368801	-0.781422	-1.28114	1.68769	-1.10593	-3.07042	0.702961	0.108082	-0.612621
	11.0871	1.50528	-2.09176	-1.37064	1.86071	-0.00453949	0.5289	-0.98365	-0.710365	0.334064	0.81778	1.30576	-1.58299	-0.638374	-0.665527	-1.55569	0.462593	-1.99965	1.73411	-1.0294	0.710945	2.00247	1.28897	-2.81733	1.05791	-2.42502	-0.464005	-1.34634	-1.11139	1.07372	-0.541946		11.0871	-1.40006	2.09618	1.49155	2.38334	-2.54016	-0.711697	0.324123	0.261417	-0.690216	-1.25724	1.74781	-1.07582	-3.1114	0.679485	0.279575	-0.681492
	11.0973	1.52172	-2.13773	-1.36514	1.88039	0.170128	0.531284	-1.0201	-0.670097	0.175491	0.647369	1.21013	-1.61676	-0.65324	-0.640556	-1.59645	0.458961	-2.01747	1.76806	-1.10511	0.461987	1.82833	1.18958	-2.87543	1.05471	-2.43563	-0.513062	-1.30126	-1.1355	0.930622	-0.493271		11.0973	-1.55235	2.04177	1.33397	2.51281	-2.52289	-0.429935	0.309212	0.198406	-0.622074	-1.35558	1.7746	-0.985332	-3.06526	0.644653	0.440449	-0.731773
	11.1076	1.56942	-2.02525	-1.35569	1.95433	0.171581	0.50103	-1.0194	-0.619789	-0.0345078	0.517311	1.15717	-1.66151	-0.673935	-0.59063	-1.68858	0.51115	-1.97084	1.73196	-1.08097	0.266388	1.78563	1.04337	-2.92437	1.00441	-2.51445	-0.608765	-1.33865	-1.07961	0.771229	-0.497791		11.1076	-1.68708	2.00558	1.22765	2.565	-2.50832	-0.243572	0.308186	0.138504	-0.517162	-1.30195	1.7992	-0.96534	-2.99977	0.764542	0.537651	-0.709408
	11.1178	1.6524	-2.01678	-1.23561	1.75994	0.180069	0.46373	-1.09111	-0.615211	-0.248024	0.445694	1.19883	-1.75472	-0.645218	-0.697727	-1.76534	0.732033	-1.92052	1.69306	-1.07268	0.182404	1.6496	0.986053	-2.93713	1.13372	-2.61727	-0.566002	-1.43537	-0.895844	0.569977	-0.527176		11.1178	-1.78364	2.07038	1.03082	2.61955	-2.44508	0.0124855	0.218468	0.073761	-0.506977	-1.28148	1.8735	-0.992699	-2.93312	0.83675	0.715572	-0.673325
	11.128	1.55002	-1.95921	-1.00694	1.54249	0.217262	0.50959	-1.21323	-0.645775	-0.335533	0.362221	1.11857	-1.81752	-0.616272	-0.792286	-1.93544	0.734535	-1.97153	1.58269	-1.01399	-0.0792236	1.49845	0.900215	-2.9409	1.14998	-2.25601	-0.617428	-1.48123	-0.764893	0.619759	-0.642677		11.128	-1.84975	2.10199	0.878521	2.70676	-2.44535	0.31057	0.280075	-0.113815	-0.508312	-1.35931	1.83358	-0.956326	-2.94588	0.799232	0.880486	-0.866562
	11.1383	1.40386	-1.97667	-0.863892	1.46067	0.297348	0.6138	-1.36672	-0.672684	-0.352142	0.325027	1.21696	-1.82639	-0.655933	-1.01086	-1.99261	0.492065	-2.03418	1.61014	-0.904022	-0.0743599	1.32664	0.837616	-3.01902	1.15575	-2.01771	-0.633976	-1.53321	-0.637947	0.636845	-0.820538		11.1383	-1.92061	2.16032	0.750584	2.65226	-2.30304	0.660816	0.222202	-0.189716	-0.522144	-1.35101	1.92153	-0.964184	-2.98174	0.72654	1.02732	-0.926357
	11.1485	1.38008	-1.89012	-0.754852	1.42434	0.292435	0.564339	-1.40833	-0.652176	-0.422165	0.230553	1.28197	-1.80065	-0.761303	-1.23741	-2.0638	0.541904	-1.92034	1.60519	-0.907154	-0.0238266	1.20962	0.738091	-3.04144	1.14519	-2.11477	-0.712486	-1.65292	-0.597794	0.663818	-0.904736		11.1485	-1.97424	2.12389	0.535446	2.69258	-2.13351	0.898472	0.254612	-0.0941696	-0.508961	-1.37935	2.07447	-0.921352	-2.94508	0.587982	1.25393	-0.874763
	11.1588	1.43779	-1.92603	-0.597771	1.35175	0.398556	0.475052	-1.41225	-0.676498	-0.499889	0.178818	1.15489	-1.82503	-0.809143	-1.19261	-2.16646	0.688232	-1.88516	1.57616	-0.880379	-0.136837	1.13848	0.692039	-3.07088	0.994709	-2.41675	-0.76812	-1.66214	-0.546974	0.722603	-0.913376		11.1588	-1.98375	1.95834	0.354641	2.83602	-2.00177	1.08889	0.328175	-0.0946579	-0.4855	-1.27502	2.23896	-0.906414	-2.94194	0.495415	1.44738	-0.880703
	11.169	1.50593	-1.91924	-0.433037	1.30257	0.45723	0.445251	-1.43942	-0.709244	-0.555321	0.164154	0.977211	-1.70762	-0.833755	-1.17854	-2.12444	0.755779	-1.91742	1.48917	-0.738762	-0.287052	1.0913	0.641502	-3.07015	0.890617	-2.71991	-0.804672	-1.57597	-0.626129	0.589649	-0.991985		11.169	-1.9815	1.98219	0.179512	3.06006	-2.00922	1.28165	0.438313	-0.223812	-0.315983	-1.20532	2.25722	-0.815327	-2.89174	0.569469	1.62957	-0.993221
	11.1792	1.39667	-1.80102	-0.237022	1.20402	0.509361	0.417953	-1.59652	-0.844082	-0.665817	0.208214	0.980858	-1.75379	-0.912258	-1.18918	-2.1818	0.700523	-1.93401	1.42347	-0.604733	-0.343235	0.993626	0.699631	-3.13711	0.845745	-2.90123	-0.947388	-1.5643	-0.707981	0.45747	-0.989517		11.1792	-1.98494	2.07133	0.00880432	3.13678	-2.10028	1.50566	0.419613	-0.263065	-0.216442	-1.26457	2.21342	-0.847324	-2.87989	0.517601	1.69631	-0.984852
	11.1895	1.35215	-1.54098	-0.0730705	1.24694	0.565201	0.324421	-1.65826	-0.943836	-0.787563	0.289146	1.04218	-1.8231	-0.884041	-1.13096	-2.15058	0.736515	-1.90135	1.40151	-0.599594	-0.433846	0.896767	0.559357	-3.16634	0.821152	-2.97992	-1.05244	-1.66959	-0.68129	0.371712	-1.10711		11.1895	-1.9565	2.03174	-0.150387	3.29052	-1.92131	1.77142	0.519199	-0.32589	-0.101833	-1.31412	2.05788	-0.790947	-2.77591	0.355404	1.80418	-0.980896
	11.1997	1.3204	-1.33644	0.0230331	1.15186	0.646904	0.19751	-1.62627	-1.03487	-0.862572	0.359383	1.09053	-1.84657	-0.882576	-1.07014	-2.15449	0.80648	-1.82975	1.33982	-0.660152	-0.567566	0.975983	0.448074	-3.23299	0.843719	-3.05013	-1.16286	-1.60254	-0.726753	0.314133	-1.23493		11.1997	-1.98719	2.04435	-0.373714	3.47853	-1.73912	1.96584	0.530926	-0.273594	-0.0482864	-1.38107	1.96791	-0.683804	-2.86982	0.272636	1.94042	-0.950687
	11.21	1.28807	-1.23807	0.240139	1.04024	0.790085	0.24456	-1.64361	-0.979576	-0.903473	0.32486	1.06006	-1.82044	-0.782223	-1.10806	-2.25287	0.84211	-1.77768	1.29735	-0.756798	-0.692722	0.919121	0.272507	-3.32608	0.896339	-3.19946	-1.12694	-1.47303	-0.646515	0.29245	-1.35989		11.21	-1.94958	2.04349	-0.513382	3.54843	-1.59986	2.12496	0.377792	-0.330002	0.0342789	-1.33025	1.87342	-0.579517	-2.89408	0.22945	2.04489	-0.854797
	11.2202	1.28981	-1.17533	0.48719	1.00667	0.853638	0.240959	-1.60035	-1.05441	-0.995239	0.239807	0.942162	-1.83913	-0.975868	-1.08565	-2.28094	0.870949	-1.75907	1.26904	-0.798199	-0.831841	0.825279	0.187485	-3.37865	0.820248	-3.31458	-1.09372	-1.46836	-0.729462	0.361313	-1.50107		11.2202	-2.03012	2.02841	-0.697666	3.52296	-1.42937	2.25355	0.272911	-0.282772	0.149639	-1.3984	1.84485	-0.572746	-2.81086	0.274307	2.08213	-0.857433
	11.2304	1.21075	-1.04684	0.647583	1.03908	0.981884	0.303738	-1.70197	-1.04036	-1.20251	0.242035	0.989811	-1.76416	-1.07634	-1.131	-2.38037	0.81189	-1.7632	1.26021	-0.904579	-0.538475	0.740353	0.0898514	-3.39802	0.89183	-3.36374	-1.16943	-1.51996	-0.754173	0.538853	-1.51775		11.2304	-1.94301	2.16595	-0.747532	3.50822	-1.48894	2.33026	0.269024	-0.344116	0.133484	-1.37575	1.90983	-0.535473	-2.70371	0.266403	2.17207	-0.846478
	11.2407	1.12379	-0.965698	0.697235	1.15277	1.08439	0.438217	-1.84481	-1.08143	-1.29396	0.215569	1.17583	-1.77736	-1.09616	-1.28999	-2.51445	0.803917	-1.69354	1.23904	-0.796638	-0.358791	0.713409	-0.0236816	-3.42544	0.941628	-3.39217	-1.28522	-1.47467	-0.78846	0.571899	-1.4327		11.2407	-1.93611	2.27549	-0.83744	3.36332	-1.46287	2.58829	0.374416	-0.471371	0.201553	-1.42257	2.01393	-0.341385	-2.63089	0.0498123	2.36647	-0.798687
	11.2509	1.20488	-0.728188	0.904682	1.08781	1.23213	0.476959	-1.97934	-1.07931	-1.3849	0.221878	1.20716	-1.74909	-1.07326	-1.35747	-2.72797	0.886932	-1.65091	1.19931	-0.708183	-0.5784	0.649445	-0.0853119	-3.40911	0.927406	-3.35567	-1.36684	-1.33571	-0.717754	0.67746	-1.29063		11.2509	-1.95381	2.32963	-0.906998	3.22407	-1.49558	2.83889	0.327629	-0.488312	0.171524	-1.46472	2.00848	-0.232487	-2.67468	-0.0723763	2.40486	-0.760738
	11.2612	1.25237	-0.636765	1.07996	1.14054	1.32714	0.538532	-1.94082	-1.06741	-1.26138	0.25256	1.1188	-1.72643	-1.06479	-1.31945	-2.88361	1.01355	-1.5639	1.17155	-0.613831	-0.847656	0.601677	-0.116356	-3.43674	0.930458	-3.32285	-1.47778	-1.26291	-0.613838	0.617363	-1.37467		11.2612	-1.97893	2.4374	-1.02022	3.22614	-1.51176	3.10287	0.351887	-0.491695	0.153999	-1.51537	2.02226	-0.0609245	-2.77155	-0.210171	2.54219	-0.785954
	11.2714	1.20155	-0.571831	1.1347	1.24986	1.60458	0.55603	-1.91435	-1.08429	-1.25209	0.195709	1.05713	-1.6776	-1.03654	-1.27824	-2.94473	1.02908	-1.49443	1.16585	-0.553368	-1.2201	0.614372	-0.140186	-3.3909	0.877838	-3.3892	-1.5792	-1.11135	-0.577076	0.690464	-1.52731		11.2714	-1.98742	2.45178	-1.10441	3.24342	-1.41259	3.28749	0.296169	-0.46249	0.165207	-1.52631	1.97163	0.0923691	-2.68602	-0.258797	2.47239	-0.616558
	11.2816	1.20673	-0.437756	1.28625	1.39103	1.72507	0.679806	-1.93487	-1.02203	-1.18565	0.0945358	1.11134	-1.57406	-0.958141	-1.22472	-2.99887	1.03736	-1.44999	1.03351	-0.619503	-1.40768	0.472157	-0.225719	-3.37519	0.684433	-3.46348	-1.66766	-1.08326	-0.58828	0.746887	-1.73324		11.2816	-1.95277	2.47141	-1.22977	3.25261	-1.31907	3.45736	0.289768	-0.40155	0.171513	-1.60827	1.88684	0.234085	-2.59861	-0.432903	2.38667	-0.430553
	11.2919	1.29528	-0.226231	1.38179	1.51229	1.87926	0.822906	-1.9234	-0.957428	-1.13721	0.0270653	1.17647	-1.52883	-0.988552	-1.29976	-3.03517	1.07326	-1.38332	1.0407	-0.551315	-1.60266	0.428146	-0.186546	-3.33644	0.527145	-3.43326	-1.78355	-1.0583	-0.549004	0.908928	-1.80257		11.2919	-1.9349	2.39455	-1.36818	3.1739	-1.3333	3.77764	0.367947	-0.374252	0.203938	-1.69919	1.81832	0.4515	-2.46764	-0.464672	2.35235	-0.214199
	11.3021	1.25692	0.038208	1.57564	1.64514	1.95204	0.718586	-2.04019	-0.898621	-1.23949	0.023407	1.2661	-1.4502	-1.12767	-1.27547	-3.05181	1.04837	-1.27596	0.975506	-0.478062	-1.71968	0.367882	-0.135384	-3.18529	0.48732	-3.46676	-1.86147	-0.96067	-0.533504	0.98317	-1.90937		11.3021	-1.82953	2.28859	-1.46449	3.0927	-1.34242	3.99703	0.421207	-0.400288	0.398846	-1.72787	1.86164	0.577549	-2.49466	-0.494511	2.3562	-0.0628166
	11.3124	1.37177	0.168518	1.733	1.68462	1.94718	0.751678	-2.08789	-0.864002	-1.37747	-0.0303345	1.45898	-1.405	-1.22335	-1.31987	-3.02821	1.07277	-1.19	0.834122	-0.372276	-1.92045	0.412323	-0.167976	-3.14165	0.509888	-3.42284	-1.68484	-0.83403	-0.517998	1.1437	-1.97435		11.3124	-1.85195	2.25845	-1.57877	3.05422	-1.30882	4.15513	0.272182	-0.446789	0.392551	-1.73848	1.67269	0.685852	-2.39007	-0.495834	2.28373	0.0366516
	11.3226	1.58534	0.263802	1.92069	1.6222	2.00296	0.940983	-2.13667	-0.839802	-1.35157	0.0866699	1.61185	-1.33953	-1.21149	-1.31857	-3.13089	1.02769	-1.03955	0.784126	-0.418255	-2.10265	0.473145	-0.261482	-3.03509	0.425926	-3.4519	-1.73895	-0.75975	-0.613232	1.26955	-1.96191		11.3226	-1.81864	2.36245	-1.70034	3.179	-1.25486	4.23026	0.298801	-0.502415	0.477081	-1.69472	1.64289	0.665314	-2.30768	-0.562592	2.34748	0.0562248
	11.3328	1.6096	0.460869	2.00149	1.68491	2.01223	1.00067	-2.21396	-0.975914	-1.32445	0.140015	1.64706	-1.23737	-1.16006	-1.32477	-3.11222	1.03441	-0.876507	0.891464	-0.538132	-2.21711	0.62384	-0.307877	-2.86449	0.399998	-3.47527	-1.71687	-0.618896	-0.59013	1.39079	-1.90079		11.3328	-1.807	2.444	-1.82998	3.12214	-1.09957	4.33968	0.159031	-0.458805	0.657623	-1.70439	1.58287	0.708454	-2.28934	-0.599998	2.37149	0.114613
	11.3431	1.66778	0.439972	2.06199	1.8237	2.02697	1.02661	-2.27316	-0.855301	-1.25608	0.265923	1.72643	-1.0528	-1.09303	-1.42796	-3.01303	1.11776	-0.821026	0.948612	-0.476692	-2.33768	0.664715	-0.30056	-2.73453	0.296215	-3.48451	-1.67059	-0.443275	-0.743134	1.52975	-1.97034		11.3431	-1.77315	2.47086	-1.85273	3.00186	-0.893887	4.50756	0.0342522	-0.517982	0.827164	-1.866	1.38913	0.726444	-2.32578	-0.653023	2.31573	0.287407
	11.3533	1.67212	0.347309	2.15265	2.02117	2.04164	1.12752	-2.37146	-0.746223	-1.21416	0.272232	1.84238	-1.08804	-1.13979	-1.5418	-2.91215	1.17641	-0.70253	0.935043	-0.441582	-2.39124	0.598946	-0.117298	-2.46844	0.263145	-3.4025	-1.72959	-0.362762	-0.762257	1.71006	-1.98059		11.3533	-1.86367	2.59089	-1.87895	2.85744	-0.866322	4.61677	-0.0919151	-0.512119	0.866894	-1.88543	1.2615	0.783154	-2.28833	-0.736195	2.28257	0.254196
	11.3636	1.73495	0.347977	2.1897	2.15378	2.20287	1.2111	-2.3884	-0.630898	-1.26604	0.203899	1.95469	-0.946861	-1.16539	-1.53572	-2.67628	1.16948	-0.592667	0.978855	-0.423702	-2.54607	0.617413	-0.040432	-2.19312	0.195923	-3.39843	-1.70353	-0.293156	-0.627144	1.87548	-1.95168		11.3636	-1.84661	2.60743	-1.88863	2.6797	-0.895615	4.75176	-0.0464859	-0.484165	0.978809	-1.97217	1.2423	0.945896	-2.34906	-0.763077	2.374	0.256916
	11.3738	1.82289	0.505013	2.25073	2.17204	2.38091	1.17071	-2.43633	-0.604065	-1.27675	0.239616	2.15446	-0.792366	-1.17118	-1.49094	-2.43435	1.2406	-0.547348	0.997963	-0.404854	-2.68282	0.697533	-0.0460701	-1.99669	0.172821	-3.41407	-1.72896	-0.239845	-0.611183	2.04982	-1.95325		11.3738	-1.7893	2.58339	-1.99531	2.54829	-0.896389	4.75871	-0.0317268	-0.509697	1.03432	-1.964	1.19979	1.07202	-2.37326	-0.763111	2.36431	0.402004
	11.384	1.88808	0.588696	2.28845	2.26366	2.47244	1.1344	-2.38442	-0.609203	-1.25333	0.352303	2.29813	-0.682205	-1.06301	-1.50454	-2.33099	1.33051	-0.436073	0.895802	-0.375767	-2.72421	0.725201	-0.0351982	-1.91693	0.187912	-3.39716	-1.69166	-0.190208	-0.551579	2.19417	-1.9743		11.384	-1.83459	2.55371	-2.07604	2.43103	-0.984974	4.84795	-0.0367088	-0.410229	1.15553	-2.11212	1.16277	1.1519	-2.31846	-0.823864	2.23023	0.486286
	11.3943	1.96089	0.658146	2.35631	2.39162	2.58131	1.12231	-2.36563	-0.587757	-1.16048	0.563377	2.37907	-0.639996	-1.01669	-1.51244	-2.3274	1.28212	-0.306232	0.877441	-0.306374	-2.68228	0.72718	-0.031086	-1.74781	0.111641	-3.25764	-1.72853	-0.117702	-0.544926	2.18781	-1.94173		11.3943	-1.94725	2.52929	-2.0827	2.34462	-0.933163	4.9687	-0.0633659	-0.336582	1.19578	-2.07389	1.02563	1.20278	-2.32653	-1.01524	2.19056	0.545914
	11.4045	2.04717	0.738968	2.44828	2.47808	2.61257	1.2278	-2.36768	-0.459202	-0.98674	0.611176	2.55183	-0.600014	-0.994415	-1.43475	-2.26695	1.15452	-0.153297	0.839809	-0.31559	-2.70738	0.782639	0.0878143	-1.51256	-0.00585938	-3.15736	-1.66998	-0.089119	-0.568195	2.35458	-1.92766		11.4045	-2.0015	2.49942	-2.06203	2.20553	-0.943272	5.18704	-0.0284004	-0.266918	1.28861	-1.99835	0.861115	1.22426	-2.43935	-1.04253	2.07024	0.529461
	11.4148	2.1517	0.79911	2.40884	2.47809	2.64721	1.34913	-2.40919	-0.45956	-0.818115	0.698475	2.64122	-0.467499	-0.939152	-1.42884	-2.16313	0.976494	-0.0624504	0.773708	-0.335022	-2.72882	0.910713	0.10033	-1.28939	-0.196095	-3.06094	-1.72308	-0.0781021	-0.475498	2.5145	-1.98762		11.4148	-1.9607	2.52413	-2.13025	2.05877	-0.937195	5.38946	0.0788612	-0.194031	1.40583	-2.01043	0.719448	1.25576	-2.44151	-0.960835	1.92268	0.602726
	11.425	2.30817	0.835556	2.47549	2.53561	2.7991	1.47689	-2.39259	-0.438686	-0.717972	0.797348	2.67442	-0.287434	-0.853012	-1.38953	-1.91892	0.860886	0.0439911	0.762993	-0.273773	-2.71726	0.906555	0.147919	-0.961132	-0.216969	-2.90353	-1.68471	-0.0173035	-0.403294	2.72054	-2.00315		11.425	-1.96038	2.45754	-2.1764	1.90226	-0.965721	5.38006	0.0309181	-0.228458	1.45351	-2.02134	0.704437	1.27475	-2.42242	-0.871487	1.86406	0.719124
	11.4352	2.45326	0.9561	2.4	2.59653	2.89801	1.64686	-2.4056	-0.422688	-0.539742	1.02827	2.86716	-0.2323	-0.759586	-1.49879	-1.68963	0.979774	0.26812	0.825943	-0.204678	-2.63496	0.975685	0.172371	-0.694675	-0.268635	-2.78024	-1.52964	0.109962	-0.403267	2.83078	-1.99808		11.4352	-1.92097	2.47477	-2.17639	1.6623	-0.941845	5.4348	-0.00805283	-0.158985	1.55925	-2.12374	0.545033	1.33519	-2.36946	-0.76321	1.6609	0.714405
	11.4455	2.48287	0.946026	2.4314	2.72717	2.91898	1.71997	-2.42641	-0.375244	-0.47068	1.08167	3.0582	-0.115795	-0.584896	-1.63288	-1.55835	1.09665	0.43047	0.844803	-0.108093	-2.66129	1.04536	0.285782	-0.471146	-0.24155	-2.6305	-1.37813	0.140121	-0.48719	2.87289	-1.89476		11.4455	-1.94896	2.5809	-2.24869	1.53126	-0.957577	5.51235	-0.0404549	-0.132675	1.66501	-2.11474	0.376934	1.4378	-2.40937	-0.659092	1.58535	0.87841
	11.4557	2.5526	0.939323	2.45634	2.92233	2.92648	1.83039	-2.42828	-0.329491	-0.380371	1.21136	3.07366	0.00220871	-0.451797	-1.67461	-1.47217	1.15737	0.529675	0.811188	-0.0954475	-2.68398	1.04487	0.324421	-0.412258	-0.249882	-2.52416	-1.28429	0.31678	-0.468597	2.95113	-1.84837		11.4557	-1.90063	2.45061	-2.26637	1.49397	-0.99754	5.41792	-0.0683708	-0.0982933	1.73175	-2.2562	0.162701	1.5242	-2.4549	-0.696819	1.55994	0.9147
	11.466	2.64716	0.894791	2.35722	2.9859	2.90057	1.8833	-2.36499	-0.268494	-0.277649	1.21489	3.06689	0.138145	-0.331028	-1.68314	-1.30537	1.22704	0.754417	0.763908	-0.160965	-2.77825	1.04565	0.327927	-0.202152	-0.245796	-2.47655	-1.37546	0.539593	-0.315338	2.9812	-1.74331		11.466	-1.79528	2.34409	-2.251	1.42601	-0.940186	5.39554	-0.196079	-0.031395	1.85448	-2.32998	0.0338974	1.55259	-2.45059	-0.642857	1.41759	1.02258
	11.4762	2.7321	0.991241	2.41417	3.02825	2.9527	1.98293	-2.43567	-0.172062	-0.20425	1.22679	3.04804	0.230961	-0.30616	-1.71609	-1.09455	1.21322	0.882175	0.777855	-0.133858	-2.77652	1.11681	0.371864	0.138966	-0.124462	-2.44211	-1.31056	0.720085	-0.180073	2.96446	-1.69585		11.4762	-1.69967	2.33135	-2.26468	1.30903	-1.05951	5.39942	-0.228065	-0.0411453	1.96825	-2.40388	-0.133247	1.60614	-2.45747	-0.572258	1.33391	1.0727
	11.4864	2.78446	1.03735	2.47001	3.09634	3.10331	2.08231	-2.50815	-0.0639496	-0.179153	1.26096	3.05701	0.37561	-0.390823	-1.71448	-0.895519	1.18567	1.0225	0.824944	0.0329781	-2.59666	1.21738	0.574306	0.46344	-0.165829	-2.2872	-1.36622	0.863914	-0.14238	3.12181	-1.67432		11.4864	-1.77959	2.37823	-2.19762	1.24052	-1.13723	5.49011	-0.202114	-0.114674	2.04971	-2.46661	-0.126965	1.73867	-2.41466	-0.476627	1.24329	1.15319
	11.4967	2.80011	0.967461	2.52893	3.11332	3.30558	2.12297	-2.49408	-0.0165176	-0.0403976	1.43016	3.09223	0.528961	-0.356766	-1.6653	-0.813194	1.31223	1.21845	0.870327	0.194481	-2.45578	1.15422	0.682941	0.664822	-0.288887	-2.09118	-1.37519	0.846603	-0.0334702	3.32956	-1.70844		11.4967	-1.8187	2.93909	-2.08035	1.2016	-1.2628	5.59416	-0.247974	-0.0542221	2.21939	-2.49762	-0.0719109	1.83218	-2.50504	-0.364407	1.15261	1.29772
	11.5069	2.92176	0.974602	2.49084	3.15376	3.36551	2.11165	-2.52511	-0.069149	0.177147	1.46956	3.13568	0.793915	-0.133724	-1.59883	-0.696583	1.45907	1.32896	0.939621	0.32299	-2.27777	1.05742	0.775913	0.863174	-0.24062	-2.07156	-1.35134	0.871628	-0.0111771	3.46219	-1.58407		11.5069	-1.82759	3.05154	-2.02378	1.18429	-1.28985	5.56865	-0.205677	-0.0581322	2.20166	-2.5412	-0.135452	1.8504	-2.48937	-0.0915222	1.0988	1.32535
	11.5172	3.01552	0.895752	2.43954	3.25811	3.3529	2.11855	-2.56887	-0.00893784	0.244202	1.53736	3.25262	1.08958	0.0739594	-1.60222	-0.48394	1.42878	1.4689	1.01654	0.484196	-2.11906	1.12367	0.908474	1.01336	-0.20475	-1.99824	-1.27364	0.971775	0.186565	3.48637	-1.51432		11.5172	-1.72601	2.9214	-2.01931	1.09916	-1.35907	5.34428	-0.179668	-0.0752754	2.33733	-2.6669	-0.203327	1.7376	-2.54225	0.147633	1.04956	1.38283
	11.5274	3.03902	0.892082	2.46329	3.19533	3.28719	2.21438	-2.58883	0.0949059	0.421074	1.70692	3.35754	1.25559	0.163105	-1.56303	-0.324448	1.42891	1.57919	1.09008	0.432732	-2.06187	1.08245	0.991039	1.14402	-0.190468	-1.94771	-1.22155	1.11342	0.228348	3.53249	-1.33157		11.5274	-1.81317	2.88993	-1.94076	0.931736	-1.35263	5.16166	0.0597191	-0.209385	2.44188	-2.62491	-0.285263	1.82162	-2.49222	0.436039	1.03724	1.57688
	11.5376	2.82922	0.849834	2.55188	3.14257	3.30358	2.28547	-2.5677	0.107376	0.591331	1.74563	3.3246	1.28421	0.24033	-1.54352	-0.122223	1.40288	1.69506	1.12058	0.461807	-1.98816	1.06054	1.14308	1.30085	-0.140427	-1.77184	-1.11467	1.21525	0.357666	3.55244	-1.28014		11.5376	-2.00023	2.79904	-1.94529	0.766449	-1.36011	5.11034	0.135807	-0.280029	2.68737	-2.58735	-0.265926	1.81965	-2.42656	0.635509	0.932796	1.75983
	11.5479	2.74863	0.86544	2.59234	3.11002	3.28336	2.50299	-2.57925	0.0752373	0.82859	1.7518	3.41605	1.41251	0.373604	-1.47668	0.0916405	1.40356	1.82837	1.11816	0.497082	-1.94927	1.10789	1.2381	1.54207	-0.13953	-1.76789	-0.986526	1.2903	0.474148	3.57546	-1.16209		11.5479	-2.01289	2.80308	-1.94007	0.746304	-1.34044	5.04631	-0.0806046	-0.248367	2.92762	-2.57301	-0.254818	1.80681	-2.33492	0.755497	0.870209	1.84986
	11.5581	2.84379	0.804199	2.64574	2.99067	3.22377	2.72613	-2.50644	0.137547	0.969055	1.84969	3.45113	1.64149	0.538307	-1.37566	0.276794	1.55352	1.95212	1.12939	0.574379	-1.7499	1.09139	1.25572	1.70236	-0.190445	-1.63333	-0.906235	1.43615	0.609818	3.64935	-1.21661		11.5581	-2.12416	2.96069	-1.91792	0.735394	-1.35361	4.92465	-0.103848	0.0318565	3.0373	-2.5595	-0.313587	1.83265	-2.29933	0.880116	0.843208	1.90367
	11.5684	2.9671	0.762047	2.73506	2.95619	3.22672	2.86652	-2.5763	0.243225	1.09754	1.94543	3.47132	1.87809	0.765289	-1.3852	0.433487	1.56142	2.12715	1.15409	0.805634	-1.61131	1.12798	1.32908	1.8791	-0.0866737	-1.44147	-0.84613	1.47215	0.640873	3.74392	-1.21935		11.5684	-2.12815	2.99794	-1.88329	0.645939	-1.35869	4.77045	-0.140316	0.131744	3.10277	-2.59452	-0.392681	1.9004	-2.26722	1.1244	0.743538	2.02776
	11.5786	2.97083	0.719872	2.66814	2.96988	3.33723	2.91741	-2.68748	0.31958	1.1727	2.08259	3.45792	1.88977	1.01014	-1.39642	0.673084	1.34122	2.24886	1.20633	1.04831	-1.39481	1.18525	1.4476	2.10062	-0.0276184	-1.30495	-0.659199	1.67802	0.754467	3.71868	-1.15117		11.5786	-2.19025	2.91525	-1.87443	0.488167	-1.26715	4.68003	-0.15324	0.215179	3.17373	-2.60233	-0.423164	1.9156	-2.2765	1.38206	0.811798	2.13223
	11.5888	2.94706	0.666611	2.68242	3.00103	3.42722	2.93612	-2.77859	0.436047	1.33338	2.1326	3.42262	2.07473	1.0109	-1.33059	0.88208	1.35989	2.33983	1.19577	1.34439	-1.2697	1.19382	1.51259	2.37308	-0.120659	-1.04817	-0.453159	1.87956	0.813835	3.73615	-1.07748		11.5888	-2.15177	2.87243	-1.72098	0.373081	-1.08525	4.53058	-0.249393	0.323051	3.12716	-2.5688	-0.536625	1.90293	-2.30971	1.63049	0.813263	2.27065
	11.5991	2.90936	0.721375	2.71169	3.00303	3.46037	2.78631	-2.65839	0.536575	1.5206	2.22346	3.45285	2.27008	1.13303	-1.30368	1.02163	1.42265	2.41397	1.1463	1.54025	-1.12395	1.25095	1.44432	2.45469	-0.231682	-1.01704	-0.363323	2.1158	0.911179	3.67411	-1.06232		11.5991	-2.04165	2.92041	-1.60234	0.33812	-0.964027	4.35299	-0.301296	0.264328	3.30401	-2.5624	-0.549824	2.024	-2.26926	1.80439	0.864105	2.39971
	11.6093	2.89244	0.715714	2.71072	2.96159	3.43149	2.76443	-2.53135	0.617805	1.54018	2.31331	3.42971	2.49961	1.32752	-1.29327	1.06363	1.44673	2.64182	1.19128	1.76498	-1.05259	1.17966	1.58789	2.46773	-0.342937	-0.902565	-0.279636	2.28485	1.06062	3.58831	-1.17763		11.6093	-2.06566	2.94575	-1.66961	0.286251	-0.868839	4.17101	-0.260109	0.356369	3.3716	-2.62501	-0.579674	2.04873	-2.2274	1.8156	0.829762	2.5745
	11.6196	2.8801	0.725655	2.68312	2.79149	3.43327	2.72765	-2.43919	0.737598	1.54556	2.33866	3.38877	2.69546	1.46724	-1.29592	1.15362	1.3562	2.84337	1.20455	1.94299	-0.908134	1.20523	1.66294	2.55457	-0.378464	-0.786064	-0.0351143	2.47189	1.17634	3.67885	-1.2995		11.6196	-2.11296	2.93399	-1.65369	0.291878	-0.808971	3.9792	-0.268429	0.561459	3.56253	-2.73482	-0.700359	2.0467	-2.16484	1.95961	0.905796	2.68324
	11.6298	2.92784	0.752396	2.77754	2.70763	3.38639	2.76021	-2.46923	0.75753	1.58775	2.39821	3.33803	2.88283	1.7581	-1.13586	1.19231	1.3064	2.89953	1.19211	2.0104	-0.828655	1.3034	1.79192	2.59942	-0.285358	-0.593563	0.0756912	2.51566	1.2185	3.78263	-1.26103		11.6298	-2.13005	2.86618	-1.70953	0.272388	-0.772614	3.71858	-0.364979	0.653736	3.68216	-2.62936	-0.750393	1.98508	-2.0789	2.11504	0.956577	2.78639
	11.64	2.9155	0.76466	2.88954	2.61059	3.31942	2.80481	-2.4688	0.728371	1.68714	2.51962	3.14503	3.02954	1.97331	-1.06272	1.22017	1.24736	2.96754	1.24821	2.14547	-0.647648	1.33608	1.87003	2.76678	-0.123104	-0.544617	0.218681	2.58242	1.2824	3.82517	-1.19369		11.64	-2.06231	2.89282	-1.7099	0.231091	-0.636761	3.56639	-0.449795	0.790745	3.79204	-2.69938	-0.845226	1.98694	-1.99686	2.29837	1.01339	2.92346
	11.6503	2.84646	0.842133	2.93963	2.57504	3.3942	2.82865	-2.38881	0.781395	1.80248	2.64608	3.12077	3.15538	2.17348	-1.08566	1.3243	1.15952	3.0961	1.23534	2.29025	-0.553841	1.25139	1.80303	2.81397	0.0375061	-0.382362	0.312653	2.63983	1.383	3.80831	-1.18256		11.6503	-2.0167	2.97151	-1.67023	0.364845	-0.600819	3.51205	-0.520821	0.837261	3.90778	-2.81702	-0.767094	2.05937	-1.83941	2.49526	0.959248	3.07781
	11.6605	2.79925	0.899071	2.93848	2.55686	3.38657	2.93409	-2.31037	0.874405	1.89072	2.77975	2.94094	3.14379	2.34027	-1.06615	1.40639	1.06556	3.33455	1.16422	2.44118	-0.365658	1.21144	1.83543	2.90374	0.0837593	-0.41246	0.391224	2.72593	1.57466	3.79835	-1.17161		11.6605	-2.07153	2.93173	-1.54741	0.302822	-0.598141	3.36544	-0.464577	1.00067	3.86502	-2.78405	-0.749237	2.02016	-1.61521	2.64892	0.973267	3.06749
	11.6708	2.73111	0.862293	3.04533	2.42328	3.39764	3.00718	-2.30558	0.947681	1.946	2.89015	3.05663	3.18599	2.53958	-1.03696	1.52205	0.871578	3.37479	1.13512	2.61518	-0.174423	1.13935	1.80206	2.92025	0.146545	-0.33371	0.53957	2.72038	1.80968	3.75521	-1.16384		11.6708	-2.04043	3.06843	-1.43656	0.211735	-0.532501	3.23582	-0.560673	1.20803	3.89292	-2.68493	-0.811657	2.01336	-1.40556	2.63994	1.145	3.10274
	11.681	2.75871	0.930027	3.11754	2.30657	3.41595	2.94827	-2.24055	1.04632	1.96684	2.96146	3.03232	3.26165	2.78564	-1.03487	1.56341	0.768463	3.41251	1.126	2.76748	0.0172882	1.17231	1.73003	2.90907	0.237923	-0.326668	0.695148	2.86618	1.70877	3.66613	-1.10956		11.681	-2.08775	3.09456	-1.39586	0.064846	-0.528042	3.06497	-0.494083	1.39325	3.93094	-2.68911	-0.805229	2.02617	-1.27998	2.63032	1.17182	3.16773
	11.6912	2.70509	1.01466	3.17076	2.11676	3.47359	2.96444	-2.21171	1.17897	1.94292	2.98388	2.8798	3.28379	2.9876	-1.09729	1.57512	0.718121	3.43327	1.29	3.01344	0.163452	1.186	1.72104	3.00726	0.354378	-0.254162	0.838913	3.02155	1.61131	3.63964	-1.09922		11.6912	-2.14999	3.06757	-1.46684	-0.0170898	-0.499706	2.93619	-0.474743	1.52337	3.90409	-2.79255	-0.772064	2.10625	-1.19161	2.86626	1.11889	3.23139
	11.7015	2.71087	1.06762	3.25636	2.00408	3.48522	3.0258	-2.17772	1.37383	1.99282	3.05558	2.73806	3.31512	3.18359	-0.996967	1.62605	0.742939	3.61358	1.37683	3.06414	0.223114	1.04155	1.73893	3.10046	0.391212	-0.135178	1.0406	3.08886	1.634	3.6841	-1.0495		11.7015	-2.25797	3.04603	-1.4734	-0.0441971	-0.46143	2.71859	-0.473209	1.62209	3.95864	-2.85726	-0.720627	2.19028	-0.988583	2.87108	1.214	3.20765
	11.7117	2.69573	1.11327	3.27996	1.83614	3.64244	3.04649	-2.14072	1.61609	2.00291	3.14534	2.56479	3.39537	3.43375	-0.907249	1.74982	0.597851	3.71835	1.44028	3.17144	0.264503	0.918655	1.79824	3.20116	0.426105	-0.215813	1.22482	3.23018	1.65004	3.73627	-0.974247		11.7117	-2.269	2.96578	-1.51158	-0.062149	-0.367077	2.46807	-0.692314	1.83815	3.95099	-2.86271	-0.749416	2.23462	-0.795586	2.77255	1.30145	3.30857
	11.722	2.7375	1.13781	3.35062	1.86983	3.75813	3.02178	-2.09633	1.71291	2.063	3.29484	2.52539	3.49073	3.66462	-0.809963	1.88181	0.545364	3.79597	1.42519	3.22824	0.368553	0.977139	1.90516	3.21144	0.457817	-0.178226	1.45312	3.22636	1.78415	3.65219	-0.858768		11.722	-2.2383	2.89729	-1.44854	-0.0408974	-0.384838	2.26441	-0.846188	2.00239	3.90158	-2.88683	-0.726242	2.43723	-0.700954	2.77914	1.49732	3.34887
	11.7322	2.87953	1.00858	3.36354	2.08226	3.7771	3.14957	-2.09005	1.73837	2.04851	3.52593	2.45631	3.56429	3.96257	-0.85487	1.90354	0.557831	3.91602	1.55684	3.4249	0.455563	1.05521	1.96094	3.20894	0.381855	-0.11961	1.71291	3.17583	1.89153	3.5172	-0.870415		11.7322	-2.1586	2.84842	-1.39035	-0.0418015	-0.369591	2.05571	-0.865524	2.09813	3.91245	-2.77007	-0.703793	2.58399	-0.538235	2.8092	1.52323	3.26133
	11.7424	2.84186	1.07036	3.4977	2.0486	3.82563	3.26453	-2.03967	1.79858	2.04501	3.7069	2.48781	3.61346	4.09762	-0.748665	1.9477	0.523987	3.95419	1.73514	3.58894	0.679153	0.981026	1.89921	3.32919	0.394039	-0.0276184	1.92372	3.17361	1.92024	3.50468	-0.840076		11.7424	-2.25634	2.72694	-1.38988	-0.0459862	-0.239452	1.88548	-0.985367	2.27899	3.9494	-2.66607	-0.716022	2.65516	-0.367634	2.8237	1.55624	3.34911
	11.7527	2.83514	1.20678	3.50271	1.82047	3.77331	3.38741	-2.06001	1.83836	2.04316	3.81607	2.43081	3.51121	4.19951	-0.70208	1.98851	0.393024	3.9879	1.87401	3.79341	0.836208	1.03772	1.725	3.36491	0.429466	0.150471	2.15898	3.16737	1.93823	3.43748	-0.872681		11.7527	-2.34056	2.72208	-1.42502	0.038414	-0.105556	1.77365	-1.13091	2.42689	3.90451	-2.48735	-0.688274	2.81128	-0.0828934	2.9046	1.411	3.24572
	11.7629	2.79924	1.44078	3.54015	1.59381	3.87479	3.44172	-2.03619	1.88171	1.97783	3.81015	2.16515	3.56633	4.4074	-0.589035	1.99209	0.298645	4.10944	1.94521	3.95515	0.999931	1.00866	1.81899	3.39922	0.487164	0.278263	2.3412	3.19542	2.05468	3.33482	-0.88007		11.7629	-2.38807	2.74168	-1.43689	0.176151	0.0163002	1.59101	-1.23147	2.61148	3.91881	-2.3627	-0.662441	3.14698	0.258965	2.90477	1.513	3.1238
	11.7732	2.76884	1.58807	3.58936	1.47918	3.94439	3.53902	-2.00178	2.06023	1.94907	4.04993	1.93253	3.54294	4.57867	-0.515968	2.0377	0.273243	4.26542	2.00471	4.0213	1.15288	1.05793	1.80246	3.34441	0.552872	0.200859	2.58205	3.30009	2.12046	3.13107	-0.939331		11.7732	-2.48421	2.76013	-1.415	0.169544	0.0777321	1.47025	-1.44467	2.79549	3.87714	-2.27801	-0.638062	3.27839	0.436871	2.8535	1.52174	3.11517
	11.7834	2.63039	1.75463	3.64448	1.32147	4.00827	3.62977	-1.9502	2.22341	2.00718	4.15962	1.79365	3.54169	4.73249	-0.468071	2.05838	0.31517	4.32711	2.14596	4.05658	1.31866	1.09561	1.83286	3.28955	0.520447	0.101295	2.76643	3.28163	2.22972	2.97523	-1.01595		11.7834	-2.61914	2.68189	-1.43911	0.225658	0.157276	1.30488	-1.56236	2.93163	3.82726	-2.05864	-0.615711	3.35859	0.783951	2.91315	1.48045	3.08582
	11.7936	2.55666	1.9738	3.7286	1.21175	4.05359	3.73359	-1.86995	2.42537	2.0815	4.19102	1.65458	3.56239	4.93278	-0.355324	2.11674	0.377289	4.48755	2.13771	4.33302	1.40028	1.04692	1.79385	3.24711	0.549297	0.0733643	2.83353	3.34399	2.34751	2.94482	-1.08351		11.7936	-2.58081	2.63198	-1.36953	0.180737	0.25441	1.16038	-1.56659	3.04424	3.80729	-1.96296	-0.521	3.35299	1.01419	2.79524	1.42673	2.985
	11.8039	2.48606	2.31124	3.65787	1.18127	4.05577	3.80402	-1.80967	2.71111	2.27637	4.16796	1.54348	3.64298	5.14321	-0.294968	2.11489	0.371662	4.57069	2.21458	4.53349	1.33978	1.06558	1.76566	3.36172	0.599411	0.154633	2.85035	3.36265	2.42451	2.83727	-1.06141		11.8039	-2.56561	2.38813	-1.37967	0.128933	0.287441	1.01672	-1.5443	3.19739	3.83586	-1.98634	-0.41291	3.4643	1.14231	2.73429	1.36512	2.90268
	11.8141	2.44795	2.40492	3.66734	1.13979	4.2077	3.79601	-1.71368	2.97317	2.31473	4.12958	1.45229	3.70618	5.24282	-0.1404	2.15424	0.352112	4.61983	2.36692	4.57272	1.44878	1.06501	1.78558	3.4677	0.610714	0.283066	2.97207	3.43922	2.53634	2.76018	-1.01133		11.8141	-2.52872	2.29487	-1.28638	0.184742	0.267414	0.885113	-1.70613	3.36906	3.74653	-1.90804	-0.450321	3.62001	1.26833	2.73735	1.45871	2.86106
	11.8244	2.37441	2.55803	3.62306	1.17634	4.3065	3.92661	-1.60784	3.05077	2.37905	4.1727	1.29705	3.75791	5.34121	-0.0561295	2.13802	0.31189	4.59839	2.4528	4.61097	1.72995	1.21558	1.88872	3.54313	0.583328	0.351196	3.18988	3.50985	2.52789	2.58021	-1.00019		11.8244	-2.41969	2.11865	-1.21144	0.228016	0.251442	0.647945	-1.77943	3.47163	3.69998	-1.79842	-0.379177	3.72424	1.498	2.76059	1.49961	2.90306
	11.8346	2.31051	2.89352	3.59362	1.21999	4.42994	4.123	-1.55298	3.06423	2.31256	4.19236	1.22752	3.74619	5.52264	0.00584412	2.16937	0.341038	4.63784	2.70576	4.64861	1.8574	1.17699	1.96554	3.67215	0.482239	0.309814	3.34487	3.58013	2.63206	2.3455	-0.993378		11.8346	-2.36005	2.00825	-1.07148	0.289341	0.325184	0.44257	-1.80456	3.5013	3.60881	-1.73879	-0.358303	3.78069	1.76144	2.76844	1.54169	2.85098
	11.8448	2.30338	3.26004	3.66173	1.28819	4.37245	4.27372	-1.53857	3.16694	2.19463	4.2809	1.20404	3.70659	5.61205	0.0457306	2.21836	0.375	4.7234	2.84566	4.75539	1.90038	1.23059	2.03452	3.58027	0.40826	0.190025	3.49329	3.73795	2.75209	2.19341	-0.926311		11.8448	-2.36586	1.96144	-1.01605	0.29755	0.303478	0.271412	-1.72945	3.63974	3.43261	-1.66046	-0.315018	3.77923	1.97305	2.83953	1.61819	2.70199
	11.8551	2.40401	3.47764	3.736	1.35501	4.47392	4.35605	-1.36743	3.29051	2.19801	4.23693	1.10709	3.75552	5.70143	0.148312	2.28885	0.396294	4.69528	2.90105	4.72302	1.90803	1.35463	2.19538	3.62626	0.506538	0.171402	3.59757	3.84426	2.74468	2.27533	-0.985035		11.8551	-2.31966	1.84433	-0.883133	0.287205	0.192101	0.00925827	-1.70469	3.90385	3.28019	-1.59053	-0.269871	3.81097	2.09741	2.92817	1.65072	2.5646
	11.8653	2.35472	3.66351	3.77245	1.45125	4.5559	4.56329	-1.31029	3.49236	2.06343	4.21113	1.05014	3.7682	5.87118	0.172676	2.46747	0.426918	4.66105	2.86568	4.71523	2.04107	1.37664	2.31122	3.67898	0.682976	0.28923	3.67172	3.99448	2.68054	2.26518	-0.982449		11.8653	-2.41757	1.76445	-0.84103	0.270252	0.138718	-0.0819969	-1.76509	3.98576	3.24747	-1.50635	-0.215309	3.85671	2.11879	2.84209	1.5564	2.479
	11.8756	2.27588	3.93093	3.77459	1.56023	4.58811	4.73116	-1.18871	3.7121	2.09663	4.23612	0.968269	3.78653	6.01765	0.16468	2.53402	0.533321	4.65391	2.98152	4.64398	2.16704	1.34857	2.26533	3.63581	0.729778	0.259155	3.75865	4.12418	2.67721	2.17747	-0.953968		11.8756	-2.47175	1.60022	-0.798313	0.282963	0.214878	-0.223919	-1.8765	4.04531	3.17916	-1.37146	-0.0678711	3.86215	2.19074	2.6514	1.6434	2.47059
	11.8858	2.36007	4.23756	3.75479	1.65311	4.65507	4.86479	-1.20353	3.87877	2.13479	4.2858	0.922768	3.75028	6.04952	0.205021	2.64078	0.651005	4.78754	3.16667	4.67202	2.24191	1.40686	2.30428	3.49265	0.707226	0.33205	3.88612	4.15575	2.76175	1.97985	-0.926575		11.8858	-2.49663	1.62733	-0.693516	0.313656	0.264851	-0.351795	-1.86283	4.15227	3.13369	-1.21817	0.0624809	3.82431	2.34799	2.4856	1.60368	2.36276
	11.896	2.225	4.48847	3.70324	1.77669	4.68185	5.13965	-1.10408	4.10482	2.32866	4.34867	0.773922	3.71729	6.06678	0.28421	2.59245	0.662903	4.95619	3.28471	4.78219	2.33961	1.51407	2.44134	3.30478	0.63142	0.360123	3.96461	4.16587	2.84766	1.89631	-0.890213		11.896	-2.53019	1.55596	-0.604252	0.334888	0.191254	-0.497013	-1.95234	4.3055	3.11839	-1.12926	0.193745	3.79725	2.49148	2.3352	1.58499	2.25199
	11.9063	2.19083	4.7383	3.71316	1.92902	4.717	5.23354	-1.06651	4.22904	2.42229	4.28942	0.63818	3.74886	6.05206	0.356369	2.54438	0.671093	4.91283	3.44351	4.9189	2.43151	1.57137	2.51072	3.13623	0.546841	0.462273	3.42917	4.20307	3.01283	1.83399	-0.735779		11.9063	-2.52539	1.38461	-0.533623	0.246971	0.190765	-0.676186	-1.95864	4.4314	2.92962	-1.07661	0.176292	3.73769	2.6089	2.19989	1.56056	2.17368
	11.9165	2.03536	5.11504	3.70688	2.00742	4.76239	5.30122	-0.947533	4.25247	2.43328	4.22867	0.577393	3.8124	6.0256	0.349609	2.59105	0.759617	4.87078	3.67213	4.99802	2.67668	1.67549	2.49277	3.14407	0.522892	0.623482	3.18141	4.36411	3.15287	1.86997	-0.53199		11.9165	-2.50074	1.35231	-0.597305	0.169582	0.104397	-0.972179	-1.88392	4.58612	2.7684	-0.892239	0.214153	3.76595	2.59989	1.9783	1.47171	2.07187
	11.9268	1.96082	5.40095	3.71639	2.15144	4.73128	5.43344	-0.731323	4.33107	2.54516	4.31415	0.463394	3.96983	5.9668	0.353413	2.80482	0.822357	4.78975	3.82775	5.0248	2.74416	1.73781	2.34319	3.10062	0.614708	0.583187	3.27433	4.41691	3.23244	1.83463	-0.395748		11.9268	-2.39589	1.17707	-0.456242	0.237137	0.0312004	-1.10497	-1.87562	4.71372	2.81012	-0.592701	0.300724	3.86934	2.64536	1.88659	1.37916	2.06019
	11.937	1.95629	5.77551	3.85336	2.25664	4.69685	5.48639	-0.598488	4.41538	2.56467	4.29144	0.433914	3.91602	6.05512	0.367012	2.95477	0.790359	4.73646	3.96194	4.96273	2.93043	1.89363	2.38007	3.17709	0.536446	0.637939	3.39594	4.45304	3.24657	1.75064	-0.278336		11.937	-2.33258	1.00932	-0.504631	0.218967	0.0369377	-1.15179	-1.84121	4.8483	2.71999	-0.447208	0.447517	3.87753	2.75627	1.89661	1.34918	2.00756
	11.9472	2.03119	6.08197	3.92013	2.27998	4.69796	5.58136	-0.548431	4.58652	2.60064	4.30226	0.369614	3.90582	6.05715	0.299004	3.06201	0.828415	4.83063	4.12541	4.93728	3.04673	2.02532	2.541	3.28864	0.465637	0.733105	3.52601	4.50159	3.23116	1.60296	-0.117073		11.9472	-2.34478	0.849396	-0.405853	0.185711	0.157993	-1.23901	-1.77907	4.93558	2.54182	-0.296921	0.430683	3.85237	2.833	1.90205	1.26411	1.95845
	11.9575	1.99815	6.42312	3.98258	2.44064	4.63534	5.69962	-0.452991	4.80764	2.59598	4.36451	0.316971	3.8211	6.05488	0.523285	3.13387	0.879158	4.91892	4.25129	4.87489	3.05673	2.13088	2.7075	3.3409	0.478832	0.843136	3.56981	4.58845	3.34283	1.54697	-0.0755386		11.9575	-2.35829	0.664326	-0.292332	0.275822	0.0154686	-1.22365	-1.80444	4.74064	2.39103	-0.114864	0.537937	3.79553	3.00148	1.91856	1.2397	1.87007
	11.9677	1.87159	6.69856	3.93819	2.56137	4.45427	5.8375	-0.452026	4.93632	2.6371	4.37662	0.367981	3.81557	5.98876	0.576691	3.35059	1.02935	4.97584	4.25964	4.83452	3.12115	2.16959	2.73335	3.36372	0.583652	0.96405	3.47911	4.83439	3.3801	1.49895	-0.0258293		11.9677	-2.32686	0.444416	-0.133686	0.391037	-0.0460548	-1.33667	-1.69124	4.62995	2.44042	-0.0194016	0.598221	3.7914	2.99939	1.86985	1.20224	1.75064
	11.978	1.72675	7.00703	3.97804	2.60367	4.36888	5.84784	-0.351105	4.96067	2.72433	4.28397	0.290852	3.74192	5.8918	0.571064	3.41497	1.15998	4.94178	4.37239	4.91226	3.06754	2.25171	2.76801	3.31315	0.619034	0.98082	3.35863	5.00864	3.35487	1.50034	0.061554		11.978	-2.25578	0.341743	-0.025074	0.443455	-0.20668	-1.38103	-1.63651	4.57174	2.40201	0.0485725	0.707073	3.81232	3.07138	1.7743	1.10229	1.64915
	11.9882	1.6148	7.36733	3.94888	2.65172	4.34965	5.84763	-0.148697	5.03648	2.81139	4.25226	0.214531	3.73582	5.84145	0.644379	3.48033	1.18342	4.90938	4.48837	5.03812	3.16977	2.24247	2.58749	3.27783	0.5961	1.07296	3.28909	5.02673	3.31021	1.44701	0.0988998		11.9882	-2.33677	0.251728	0.035183	0.368542	-0.264664	-1.42994	-1.51392	4.48603	2.28848	0.18478	0.795715	3.81409	3.28308	1.71047	1.07377	1.56865
	11.9984	1.55933	7.74229	3.94682	2.75548	4.35001	5.8562	-0.0377121	5.06648	2.92329	4.18974	0.139133	3.72825	5.76036	0.698822	3.38468	1.28402	4.87266	4.61598	5.18325	3.27881	2.21471	2.51843	3.23844	0.689106	1.23583	3.27576	5.12001	3.43411	1.45865	0.255898		11.9984	-2.34829	0.177494	-0.0730095	0.364498	-0.284607	-1.49133	-1.44156	4.3952	2.17891	0.365097	0.917835	3.82494	3.44589	1.59097	1.16441	1.36326
	12.0087	1.59923	7.94962	3.99361	2.83877	4.35366	5.96373	0.012558	5.11364	2.89342	4.1212	0.0799942	3.64949	5.69674	0.809258	3.45439	1.1871	4.80194	4.64095	5.14631	3.33639	2.34256	2.55888	3.25257	0.836807	1.35436	3.29286	5.18007	3.48738	1.44373	0.463287		12.0087	-2.38907	0.188297	-0.140003	0.280575	-0.341885	-1.63017	-1.56967	4.42645	2.20123	0.46534	0.955551	3.90014	3.51022	1.48771	1.16816	1.29889
	12.0189	1.53958	8.10593	3.99975	2.93607	4.2188	6.02931	0.00156403	5.17099	2.99703	4.04836	0.0818062	3.62716	5.62455	0.811378	3.50365	1.22844	4.7017	4.72163	5.09505	3.37165	2.37067	2.69067	3.2609	0.875011	1.33176	3.18791	5.30013	3.57069	1.39332	0.460022		12.0189	-2.38881	0.174335	-0.202282	0.250858	-0.366539	-1.69643	-1.55207	4.45566	2.14396	0.50705	0.94566	3.82206	3.42426	1.40192	1.16971	1.34128
	12.0292	1.51086	8.29206	4.0128	3.03109	4.20441	5.89482	0.135757	5.34239	3.02866	3.89715	0.0716476	3.57455	5.66622	0.90448	3.64928	1.23737	4.62151	4.83585	5.04412	3.38622	2.52017	2.68785	3.24936	0.906723	1.30636	3.06235	5.33338	3.56371	1.46664	0.594143		12.0292	-2.18402	0.187893	-0.234955	0.239857	-0.363319	-1.72474	-1.55321	4.39643	2.02786	0.648098	1.04679	3.84327	3.45164	1.36901	1.11278	1.25945
	12.0394	1.48978	8.4567	4.01218	3.12177	4.17222	5.75548	0.13316	5.45221	3.03669	3.79011	0.121361	3.65633	5.77908	0.909416	3.71146	1.3089	4.53149	4.84579	4.95693	3.47292	2.65127	2.58446	3.22195	0.804367	1.32102	3.01447	5.52369	3.52444	1.50869	0.860695		12.0394	-2.05726	0.0653915	-0.171787	0.231472	-0.236576	-1.70953	-1.46623	4.29835	1.97411	0.784355	1.24715	3.82548	3.59623	1.27956	1.04152	1.25732
	12.0496	1.44019	8.5085	3.98883	3.2476	4.07021	5.8166	0.226738	5.53183	3.11637	3.71385	0.151817	3.69822	5.77081	0.925842	3.78771	1.40734	4.44415	4.74428	4.84478	3.57738	2.73636	2.61557	3.25604	0.816563	1.28349	2.87347	5.54	3.49285	1.51939	1.03352		12.0496	-2.00686	0.134533	-0.0547829	0.238041	-0.18224	-1.81953	-1.46018	4.24466	1.93929	0.975521	1.39806	3.83516	3.60091	1.14627	0.94331	1.2492
	12.0599	1.37218	8.73909	3.86631	3.28768	3.9198	5.75023	0.30872	5.56083	3.26698	3.72631	0.149456	3.73119	5.66151	1.02257	3.85213	1.51512	4.46273	4.74215	4.84041	3.56491	2.78265	2.53123	3.19881	0.891987	1.35775	2.70981	5.62644	3.51181	1.46553	1.10779		12.0599	-1.98169	0.243862	-0.02845	0.300411	-0.11758	-1.94756	-1.30612	4.13831	1.99913	1.0677	1.40982	3.75526	3.5535	1.10572	0.95467	1.29673
	12.0701	1.37817	8.97543	3.78754	3.31754	3.76772	5.77915	0.421921	5.5076	3.462	3.769	0.0978165	3.72355	5.58079	1.07108	3.91293	1.56126	4.36827	4.85348	4.69181	3.50899	2.75056	2.54604	3.21858	0.953926	1.41668	2.67941	5.76009	3.38446	1.5997	1.2942		12.0701	-1.87754	0.384838	-0.0633278	0.288647	0.001091	-1.97207	-1.25605	4.04056	1.84163	1.10347	1.39651	3.69899	3.60489	1.01338	0.806576	1.25995
	12.0804	1.45562	9.17621	3.7242	3.44	3.58472	5.68017	0.525917	5.44645	3.53972	3.76623	0.0923691	3.82349	5.46046	1.09616	3.95953	1.58675	4.20454	4.8504	4.54596	3.58854	2.9315	2.55816	3.26474	1.12553	1.29843	2.67346	5.85553	3.31192	1.66632	1.35459		12.0804	-1.83724	0.440723	-0.0606346	0.296787	0.0476799	-1.92772	-1.10906	3.97565	1.66473	1.18042	1.4467	3.70596	3.7416	1.03671	0.71389	1.21416
	12.0906	1.4718	9.32455	3.64676	3.45576	3.48433	5.52332	0.607635	5.42608	3.56562	3.86094	0.183243	3.82933	5.31611	1.10803	4.08267	1.61512	4.18357	4.84755	4.53333	3.73439	3.00203	2.53206	3.3759	1.31667	1.33799	2.52096	5.90449	3.34654	1.64555	1.3852		12.0906	-1.80321	0.381763	-0.0474052	0.239998	0.0723305	-1.89214	-0.958508	3.83437	1.68752	1.38814	1.45795	3.74151	3.83759	0.928944	0.665516	1.28146
	12.1008	1.49243	9.55863	3.6368	3.44939	3.3911	5.35988	0.57457	5.40805	3.5334	3.83251	0.10994	3.8548	5.12858	1.21645	4.06822	1.75253	4.14522	4.83212	4.47183	3.74982	3.044	2.41665	3.32495	1.46632	1.32622	2.31716	5.95446	3.32446	1.62657	1.51168		12.1008	-1.76986	0.430744	-0.117069	0.295036	0.0673828	-1.85091	-0.877079	3.6653	1.70171	1.47402	1.58594	3.85902	3.86305	0.881153	0.49308	1.36221
	12.1111	1.60369	9.73605	3.48154	3.45724	3.2733	5.24285	0.530891	5.31427	3.58013	3.72147	0.0785522	3.84974	4.9932	1.29029	4.1426	1.79831	4.07034	4.745	4.50248	3.71739	3.06091	2.41596	3.28345	1.62191	1.31506	2.06917	6.04567	3.15223	1.61503	1.63682		12.1111	-1.75467	0.427479	-0.212509	0.256962	0.108044	-1.78636	-0.824577	3.39238	1.59338	1.64734	1.59192	4.01311	3.85146	0.808163	0.429722	1.31323
	12.1213	1.58264	10.0067	3.33323	3.50404	3.07242	5.18256	0.541084	5.33938	3.5754	3.67649	-0.041935	3.86233	4.96129	1.3006	4.23224	1.99509	4.06586	4.75483	4.41437	3.78941	3.06958	2.38365	3.3158	1.74817	1.37827	1.85155	6.08634	2.99491	1.57074	1.71519		12.1213	-1.68514	0.431805	-0.194687	0.262146	0.189884	-1.91442	-0.663418	3.14075	1.49036	1.86389	1.61972	4.08954	3.94292	0.774067	0.41111	1.29872
	12.1316	1.53145	10.2788	3.4005	3.48669	2.92653	5.06096	0.616211	5.46	3.70291	3.62978	-0.0912514	3.81251	4.91784	1.32048	4.25402	2.0953	4.09819	4.78161	4.32892	3.9293	3.11145	2.28457	3.31509	1.8677	1.30396	1.79028	6.1894	2.87793	1.66438	1.79313		12.1316	-1.5367	0.627918	-0.274246	0.321083	0.269825	-1.96891	-0.486652	2.96024	1.43749	2.03156	1.73432	4.09824	4.00904	0.641125	0.355068	1.37516
	12.1418	1.55291	10.5021	3.34821	3.47965	2.89916	4.98684	0.761642	5.38426	3.7776	3.53921	-0.0344009	3.80016	4.88009	1.23142	4.2757	2.22293	4.09906	4.70825	4.10342	4.09683	3.02715	2.31392	3.36144	1.89586	1.22642	1.73186	6.30982	2.81136	1.64899	1.88733		12.1418	-1.48438	0.802059	-0.333149	0.308987	0.320023	-1.90841	-0.377171	2.92876	1.3372	2.13143	1.823	4.04096	4.05256	0.634571	0.317162	1.52417
	12.152	1.718	10.7212	3.24088	3.41383	2.85796	4.90494	0.702919	5.29179	3.88118	3.35064	-0.00527954	3.7699	4.86614	1.18038	4.30145	2.41259	4.04348	4.58638	3.92113	4.24343	3.05569	2.23149	3.35569	1.97827	1.29264	1.63744	6.28869	2.69928	1.61954	1.8783		12.152	-1.39573	0.904743	-0.299854	0.334591	0.442867	-2.02316	-0.194603	2.77977	1.23563	2.32075	1.88783	3.99194	4.05405	0.63142	0.406044	1.52132
	12.1623	1.85128	10.9756	3.07926	3.46914	2.74493	4.74819	0.677113	5.30446	4.00025	3.26127	-0.0277939	3.69841	4.83818	1.06678	4.48792	2.66438	3.9882	4.52431	3.74916	4.29949	3.10497	2.17095	3.36582	2.00338	1.41254	1.44817	6.28624	2.66315	1.65425	1.8867		12.1623	-1.25098	0.886051	-0.354771	0.406998	0.489967	-2.10131	-0.142796	2.58819	1.21413	2.55187	2.05298	4.02959	3.99601	0.670509	0.462536	1.52124
	12.1725	1.90717	11.3189	3.03172	3.46002	2.53671	4.63293	0.746838	5.24847	4.08155	3.20704	-0.063942	3.70018	4.72633	0.854294	4.53076	2.89891	3.95403	4.53267	3.57963	4.37894	3.01171	2.10212	3.38623	2.00991	1.48352	1.33812	6.13212	2.53873	1.74853	1.957		12.1725	-1.12516	0.884598	-0.448162	0.625389	0.634903	-2.10386	0.00355911	2.44853	1.03552	2.78687	2.0514	4.22435	4.05098	0.703888	0.463993	1.56212
	12.1828	2.00191	11.6464	2.88809	3.46614	2.32062	4.48491	0.764957	5.27952	4.17715	3.10303	-0.0443535	3.67857	4.67371	0.835243	4.67247	3.05445	3.92399	4.47351	3.53633	4.46594	2.82804	1.92265	3.45189	2.14613	1.60804	1.25174	6.10562	2.41434	1.84148	2.15801		12.1828	-1.09808	0.887508	-0.572666	0.61174	0.722317	-1.98509	0.0918465	2.27516	0.812977	3.0262	2.03807	4.3224	4.096	0.656506	0.457996	1.55816
	12.193	2.16946	11.8677	2.80593	3.43454	2.15103	4.38362	0.800983	5.10277	4.29984	3.09348	-0.0441132	3.61131	4.61759	0.86805	4.73682	3.26536	3.98626	4.39816	3.52402	4.57965	2.83287	1.80737	3.4035	2.38555	1.7599	1.1586	6.02093	2.30139	1.80687	2.19141		12.193	-1.06792	0.846928	-0.692993	0.48769	0.715168	-1.98273	0.280136	2.16543	0.669964	3.21891	1.9867	4.36668	4.0731	0.565334	0.422234	1.51957
	12.2032	2.32958	12.0734	2.62424	3.5664	1.96539	4.2981	0.817352	4.98202	4.36451	2.98089	0.0325966	3.60637	4.60394	0.744812	4.75853	3.35472	3.98798	4.29963	3.50008	4.66866	2.79308	1.62287	3.42504	2.47703	1.8922	0.964191	6.07884	2.27386	1.70715	2.23383		12.2032	-1.06354	0.863667	-0.711697	0.491779	0.787861	-1.92762	0.443535	1.99121	0.685959	3.50616	2.10794	4.39308	4.08697	0.500385	0.322193	1.49626
	12.2135	2.33664	12.3421	2.50664	3.66931	1.79627	4.3361	0.766949	4.89056	4.28739	2.95343	0.158447	3.57689	4.50292	0.666168	4.76436	3.51447	3.98833	4.22244	3.50303	4.73624	2.81337	1.5361	3.45848	2.6124	2.03732	0.769012	6.13089	2.36348	1.69296	2.36568		12.2135	-0.935978	0.913982	-0.708431	0.463673	0.855633	-1.82745	0.591892	1.90201	0.719746	3.76785	2.25474	4.3978	4.07606	0.388721	0.251537	1.46808
	12.2237	2.52409	12.5713	2.42964	3.64836	1.59083	4.36758	0.704483	4.80396	4.19016	2.88849	0.199512	3.48561	4.41256	0.662178	4.76546	3.77584	4.02462	4.17724	3.45735	4.85938	2.81359	1.35445	3.45225	2.59679	2.10234	0.558952	6.22639	2.27622	1.64743	2.50042		12.2237	-0.857872	1.04843	-0.657291	0.409538	0.939541	-1.71935	0.665516	1.76818	0.639538	4.01002	2.23285	4.38407	3.98843	0.296322	0.252979	1.49265
	12.234	2.72236	12.7813	2.25581	3.57024	1.49897	4.35593	0.580566	4.68514	4.15001	2.86373	0.248375	3.36329	4.31799	0.639122	4.82514	4.08704	4.09463	4.16179	3.31144	5.08578	2.83091	1.23737	3.41983	2.69257	2.20995	0.33374	6.23116	2.21181	1.57316	2.70316		12.234	-0.738651	1.16236	-0.767296	0.430733	1.1607	-1.69305	0.659615	1.57297	0.536152	4.29859	2.10836	4.39394	3.98267	0.213974	0.284496	1.50787
	12.2442	2.97923	12.9695	2.00738	3.41971	1.30188	4.2352	0.528328	4.46545	4.19932	2.73433	0.2929	3.32302	4.12222	0.595596	4.82301	4.2812	4.02515	4.02524	3.1927	5.2265	2.80531	1.08173	3.36426	2.68726	2.33757	0.218811	6.16856	2.07243	1.55383	2.78553		12.2442	-0.680546	1.14071	-0.752575	0.581974	1.40471	-1.60595	0.808712	1.40076	0.533836	4.50441	1.95098	4.55883	3.96688	0.0737839	0.239128	1.4616
	12.2544	3.10314	13.0778	1.95528	3.4258	1.07436	4.11997	0.487091	4.29384	4.25961	2.68301	0.214439	3.32434	3.95947	0.619286	4.87438	4.43683	3.83067	3.89331	2.96758	5.36451	2.71193	0.905479	3.36203	2.61068	2.38318	0.0998154	6.06943	2.13729	1.48601	2.85987		12.2544	-0.741692	1.05474	-0.750191	0.638706	1.52357	-1.5313	1.04719	1.28134	0.415569	4.67171	1.90547	4.64951	3.96038	-0.0206413	0.283031	1.32279
	12.2647	3.23724	13.2531	1.89913	3.49017	0.986652	4.04961	0.537769	4.24774	4.24896	2.61623	0.118069	3.44749	3.86546	0.617554	4.8783	4.65082	3.76759	3.84933	2.83357	5.49103	2.60839	0.809006	3.43114	2.6787	2.56195	-0.0141449	6.04821	2.10913	1.57016	2.95664		12.2647	-0.763374	1.1736	-0.806316	0.69347	1.54485	-1.57621	1.18336	1.24876	0.406723	5.04307	2.03756	4.67801	3.94823	-0.119488	0.45187	1.24228
	12.2749	3.34738	13.3556	1.78358	3.49265	0.905579	3.94931	0.695389	4.1937	4.15955	2.53638	0.111916	3.47127	3.88613	0.754276	4.71192	4.91438	3.58495	3.79689	2.83414	5.61464	2.6244	0.689129	3.37896	2.7576	2.67738	-0.197182	6.05656	2.08276	1.60929	3.05233		12.2749	-0.803562	1.22068	-1.40054	0.804646	1.54547	-1.56479	1.17947	1.17497	0.334675	5.4295	2.20546	4.61172	3.82455	-0.283592	0.529461	1.23893
	12.2852	3.45435	13.466	1.578	3.55486	0.815479	3.88575	0.705688	4.07356	4.12611	2.63459	0.165848	3.4498	3.7856	0.720078	4.70056	5.01234	3.46618	3.65355	2.81155	5.75409	2.69316	0.586082	3.41245	2.84122	2.74904	-0.290367	5.98047	2.04581	1.5573	2.99583		12.2852	-0.69894	1.14036	-1.76014	0.874466	1.61034	-1.51749	1.22946	1.21322	0.231998	5.68963	2.32481	4.60838	3.71874	-0.408932	0.464779	1.2054
	12.2954	3.58908	13.5312	1.36899	3.63137	0.706413	3.87072	0.7435	3.80885	4.06645	2.60114	0.292866	3.50064	3.7356	0.746719	4.65309	5.12747	3.33983	3.6941	2.72699	5.89429	2.60873	0.490135	3.33694	2.92566	2.81183	-0.434383	5.90126	2.00623	1.48394	2.95871		12.2954	-0.708393	1.06632	-1.69191	0.997921	1.79867	-1.48343	1.25093	1.13006	0.147816	5.84064	2.23781	4.57838	3.57238	-0.474628	0.496239	1.17673
	12.3056	3.65341	13.6018	1.20622	3.71748	0.60704	3.85567	0.716736	3.65576	4.08985	2.58128	0.359169	3.45737	3.68696	0.645927	4.72453	5.19499	3.31527	3.61119	2.55841	6.03004	2.41796	0.347343	3.23378	3.07594	2.90625	-0.581093	5.75351	1.99004	1.31901	2.81289		12.3056	-0.605148	0.997204	-1.59274	1.07433	1.81514	-1.46695	1.29134	1.08223	0.0424919	6.08298	2.17972	4.63226	3.43269	-0.431637	0.524384	1.05809
	12.3159	3.78027	13.6347	1.15969	3.80942	0.479546	3.74834	0.597588	3.39971	4.03223	2.51285	0.369255	3.46548	3.69914	0.540222	4.70933	5.30757	3.19209	3.55108	2.51922	6.05658	2.30148	0.256447	3.19342	3.03183	2.91292	-0.671394	5.52063	2.0032	1.30894	2.71241		12.3159	-0.678402	0.98719	-1.34478	1.13258	1.74838	-1.42264	1.36502	1.07518	-0.0332413	6.41771	2.11819	4.60638	3.26627	-0.414761	0.618084	0.89056
	12.3261	3.92565	13.5093	1.07478	3.86595	0.362473	3.55844	0.443855	3.27961	3.94259	2.47649	0.30265	3.51105	3.60077	0.521248	4.71777	5.47768	3.10414	3.46059	2.43245	6.08077	2.2995	0.178616	3.10034	2.87407	2.98908	-0.772804	5.33903	2.01456	1.3851	2.74868		12.3261	-0.694984	1.00607	-1.29815	1.2089	1.68684	-1.44579	1.46554	1.05303	-0.118824	6.58076	2.01274	4.59079	3.2275	-0.458878	0.656776	0.839787
	12.3364	4.10499	13.3816	0.936489	3.77042	0.192932	3.58184	0.453033	3.20546	3.86899	2.47827	0.266174	3.55311	3.61704	0.675156	4.78988	5.65373	3.05688	3.38271	2.4102	6.16912	2.33102	0.110771	3.09634	2.81425	3.0304	-0.888165	5.30674	2.01174	1.3897	2.68033		12.3364	-0.652271	0.993435	-1.31977	1.36672	1.66219	-1.46478	1.47281	0.903217	-0.1376	6.78963	1.92469	4.57454	3.07964	-0.638088	0.620346	0.71278
	12.3466	4.29207	13.1848	0.889153	3.82664	0.0719681	3.62035	0.477879	3.11405	3.90797	2.32789	0.394466	3.38026	3.65632	0.730194	4.74541	5.77479	3.03567	3.28617	2.42993	6.19778	2.29903	-0.0166855	3.02556	2.76756	3.0117	-1.09563	5.21983	2.05605	1.29107	2.70655		12.3466	-0.538605	0.98457	-1.18069	1.42229	1.76544	-1.46229	1.50274	0.839321	-0.214108	7.04431	1.887	4.46351	2.8801	-0.78297	0.725071	0.588734
	12.3568	4.51333	12.8198	0.635269	3.9651	0.0347061	3.55058	0.476974	2.89394	3.97972	2.21474	0.33379	3.38268	3.65435	0.703171	4.67514	5.91689	2.97597	3.1953	2.38343	6.22712	2.3205	-0.176651	2.98833	2.90718	3.01599	-1.38422	5.12329	2.198	1.19955	2.73543		12.3568	-0.486759	0.987476	-1.23812	1.38848	1.77711	-1.28258	1.59392	0.681156	-0.291176	7.23251	1.80759	4.36583	2.76201	-0.908607	0.861698	0.49321
	12.3671	4.66883	12.4883	0.478832	4.04463	-0.116894	3.43031	0.468864	2.74494	3.99464	2.10286	0.237991	3.61723	3.77333	0.737816	4.60595	6.12574	3.02431	3.11359	2.30601	6.39111	2.48392	-0.322098	2.94992	2.97881	2.93757	-1.44891	4.99409	2.1607	1.19449	2.71697		12.3671	-0.501125	1.00941	-1.42804	1.40807	1.75169	-1.14085	1.73478	0.606186	-0.367207	7.34435	1.90377	4.28236	2.6374	-1.06757	0.907738	0.441914
	12.3773	4.8339	12.2421	0.438812	4.20309	-0.266205	3.29394	0.449543	2.63371	3.92009	2.04947	0.224297	3.67655	3.72252	0.572159	4.58722	6.1524	3.08693	3.12743	2.24033	6.52711	2.51571	-0.437195	2.83311	2.90578	2.76975	-1.50023	4.77001	2.12269	1.20857	2.72348		12.3773	-0.430973	0.973076	-1.42807	1.35973	1.78971	-1.06003	1.76345	0.486881	-0.469334	7.5328	1.95631	4.12588	2.45345	-1.14552	0.928623	0.340157
	12.3876	4.98833	11.9235	0.309566	4.33439	-0.291489	3.22335	0.493362	2.45048	3.98131	2.01985	0.296715	3.72942	3.61603	0.504486	4.48963	6.24085	3.21931	3.12877	2.13918	6.55727	2.46166	-0.576553	2.83355	2.94233	2.73993	-1.58043	4.58894	2.15862	1.12962	2.65811		12.3876	-0.272816	0.940136	-1.35067	1.42788	1.8658	-1.07436	1.76391	0.361736	-0.481037	7.68747	1.98205	3.97573	2.27604	-1.21151	0.995415	0.264687
	12.3978	5.0241	11.5655	0.105934	4.45494	-0.352234	3.1919	0.416569	2.35682	4.02378	1.98431	0.377136	3.79231	3.4486	0.515892	4.35771	6.33422	3.20646	3.07914	2.19838	6.57984	2.33313	-0.669857	2.70466	2.94055	2.75647	-1.69967	4.44666	2.14716	1.13438	2.737		12.3978	-0.0349846	0.954075	-1.47048	1.515	1.92173	-1.03833	1.81734	0.341469	-0.520641	7.76755	1.86138	3.76293	2.15004	-1.29947	1.03051	0.0930748
	12.408	5.08988	11.1857	-0.140759	4.54698	-0.417908	3.13602	0.248329	2.28185	3.98702	1.94829	0.396217	3.84208	3.32238	0.512711	4.22751	6.34276	3.16755	3.0829	2.25659	6.43366	2.32989	-0.748116	2.62546	2.90189	2.72672	-1.80426	4.31129	2.15086	1.11845	2.87116		12.408	0.0369987	1.01384	-1.69869	1.47757	1.89651	-1.00875	1.84332	0.194546	-0.695545	7.79787	1.70587	3.4474	1.96373	-1.45181	1.01401	0.00776672
	12.4183	5.20975	10.7119	-0.344604	4.68039	-0.529335	3.17698	0.290062	2.17965	3.92963	1.88696	0.520542	3.79833	3.35044	0.612953	4.03302	6.24199	3.20548	2.96542	2.30083	6.34345	2.36539	-0.842232	2.50881	2.79264	2.68351	-1.88473	4.12177	2.12442	1.14788	2.87905		12.4183	0.195366	1.04987	-1.83771	1.55596	1.81721	-0.903362	1.912	0.122112	-0.715881	7.94918	1.52425	3.16449	1.88423	-1.56563	1.04332	0.00680161
	12.4285	5.40815	10.1351	-0.450119	4.72395	-0.556156	3.14264	0.315216	2.01141	3.94029	2.0442	0.587791	3.72749	3.43546	0.598255	3.95522	6.26279	3.25963	2.94994	2.44212	6.37927	2.49239	-0.967918	2.46327	2.72892	2.70901	-1.83763	3.92953	2.15716	1.14367	2.81303		12.4285	0.273399	1.13441	-1.90795	1.59885	1.7602	-0.795643	2.12378	0.112255	-0.669067	7.9828	1.38327	3.02004	1.76973	-1.57746	1.02198	-0.202221
	12.4388	5.64322	9.55914	-0.521515	4.65639	-0.555763	3.1313	0.300362	1.91194	3.88902	2.22788	0.653511	3.81441	3.43358	0.604767	3.73755	6.22881	3.34287	3.01025	2.53305	6.37297	2.69247	-1.04301	2.35087	2.72347	2.69721	-1.86146	3.83906	2.26241	1.22042	2.72892		12.4388	0.404079	1.17013	-1.95404	1.70159	1.63651	-0.675663	2.16727	0.0425034	-0.630444	8.01952	1.31699	2.91043	1.65403	-1.53887	1.18587	-0.30547
	12.449	5.68897	8.97481	-0.537022	4.8307	-0.523338	3.16241	0.281647	1.60752	3.95478	2.23727	0.706463	3.89051	3.23403	0.595741	3.54533	6.1821	3.32427	3.04482	2.61222	6.42587	2.88809	-1.11478	2.23975	2.75598	2.60313	-2.00029	3.70169	2.28341	1.24653	2.74592		12.449	0.541599	1.16226	-1.91029	1.6975	1.58416	-0.594418	2.08442	0.0786476	-0.573784	8.10432	1.17138	2.69409	1.61601	-1.52369	1.23774	-0.335583
	12.4592	5.71711	8.45739	-0.769669	4.97796	-0.576946	3.15513	0.335518	1.33357	3.99345	2.16984	0.780052	3.96456	3.16434	0.658386	3.53964	6.20565	3.335	3.1678	2.64384	6.29288	3.0836	-1.18689	2.16016	2.75671	2.55667	-2.0005	3.50882	2.30042	1.18939	2.7389		12.4592	0.588089	1.20702	-1.81411	1.64425	1.6016	-0.586933	2.05593	0.0790749	-0.574306	8.08371	1.09282	2.46595	1.46389	-1.71008	1.28411	-0.354473
	12.4695	5.85892	7.98639	-0.986881	4.99033	-0.599701	3.24054	0.43589	1.19289	3.91103	2.12293	0.834221	3.95744	3.2022	0.576729	3.44428	6.19398	3.42226	3.30746	2.74431	6.24036	3.21399	-1.31496	2.07401	2.67686	2.43307	-2.0076	3.36243	2.34355	1.23895	2.75423		12.4695	0.674397	1.18647	-1.871	1.56765	1.53537	-0.685032	1.9108	-0.038559	-0.568062	8.23806	0.971298	2.28607	1.21984	-1.95859	1.23528	-0.408871
	12.4797	5.92789	7.47329	-1.07667	4.9671	-0.528214	3.23895	0.531986	1.12167	3.95369	2.15741	0.801315	4.09353	3.21108	0.600876	3.35666	6.2269	3.57938	3.34237	2.77423	6.05952	3.15806	-1.36518	1.96989	2.68288	2.31524	-2.01348	3.18102	2.37323	1.13486	2.71912		12.4797	0.876278	1.34482	-1.95692	1.42818	1.48777	-0.699265	1.86015	-0.0503731	-0.634197	8.34534	0.804432	2.21447	1.05849	-2.04167	1.36577	-0.4715
	12.49	5.9409	7.11882	-1.22723	5.01265	-0.446114	3.18995	0.52766	1.10043	3.94938	2.04764	0.785965	4.2004	3.06784	0.469345	3.30769	6.14633	3.78157	3.45683	2.83325	5.94248	3.19609	-1.46223	1.86111	2.68484	2.18335	-2.13034	3.07489	2.41493	1.09864	2.65048		12.49	1.02135	1.38214	-1.96138	1.30618	1.57157	-0.683575	1.87499	-0.143436	-0.617596	8.50467	0.658112	2.03808	0.991734	-2.07299	1.48375	-0.509949
	12.5002	5.99884	6.68156	-1.40001	5.06514	-0.560699	3.14602	0.439972	1.02354	3.87572	2.11817	0.825264	4.28869	3.07312	0.510551	3.26476	6.00852	3.87843	3.42746	2.8698	5.7575	3.12991	-1.46841	1.81232	2.60794	2.03896	-2.16907	2.93571	2.52295	1.13052	2.72226		12.5002	1.25235	1.35138	-1.94675	1.31131	1.52698	-0.433346	1.99484	-0.135738	-0.622982	8.80136	0.485855	1.84833	0.864323	-2.04617	1.62347	-0.602287
	12.5104	5.9208	6.21721	-1.52195	4.98406	-0.891632	3.01516	0.394943	0.950172	3.89762	2.01452	0.900105	4.35219	3.0648	0.58667	3.28875	5.78195	3.90028	3.56279	2.96891	5.52149	3.20847	-1.61068	1.67265	2.50612	1.89209	-2.1716	2.76454	2.75615	1.36742	2.69049		12.5104	1.32405	1.32834	-1.99615	1.33463	1.49768	-0.20097	2.19229	-0.146969	-0.700027	9.10154	0.37883	1.78761	0.64835	-2.09433	1.64134	-0.696163
	12.5207	5.8544	5.66301	-1.62153	5.05563	-0.769337	3.00652	0.426163	0.991993	3.89494	2.00974	1.01717	4.46772	3.00054	0.612015	3.16983	5.61747	4.00337	3.58061	3.00581	5.3451	3.27658	-1.74218	1.602	2.56795	1.80322	-2.1799	2.62228	2.95061	1.48709	2.55179		12.5207	1.48569	1.20211	-2.10113	1.35536	1.4001	-0.0310135	2.4026	-0.114555	-0.755604	9.34254	0.341434	1.65748	0.477726	-2.17834	1.61368	-0.692181
	12.5309	5.71893	5.14466	-1.69431	5.12631	-0.561508	3.07516	0.533119	0.945965	3.87757	2.00875	1.12812	4.63357	2.84218	0.582649	3.11141	5.54679	4.19082	3.69625	2.95405	5.18242	3.35876	-1.87424	1.50167	2.6019	1.70515	-2.22581	2.58905	3.00941	1.51888	2.46106		12.5309	1.5912	1.18001	-2.09484	1.29576	1.32626	0.079937	2.46383	-0.175507	-0.774986	9.6431	0.311008	1.42143	0.372417	-2.2247	1.54811	-0.676102
	12.5412	5.71075	4.69114	-1.70128	5.06654	-0.322197	3.06596	0.575905	0.793938	3.74438	1.94386	1.17197	4.74917	2.67746	0.601009	2.97866	5.41493	4.18065	3.77739	2.97236	4.99292	3.46914	-1.7955	1.33183	2.52106	1.52686	-2.24055	2.50911	3.12559	1.47475	2.38882		12.5412	1.69144	1.27584	-2.1844	1.14594	1.24155	0.175838	2.3652	-0.149651	-0.892681	9.93187	0.232487	1.26892	0.341351	-2.3245	1.50732	-0.70005
	12.5514	5.69703	4.30446	-1.72164	5.12421	-0.193413	2.96463	0.676552	0.679459	3.78389	1.86845	1.06647	4.80452	2.69285	0.678673	2.9028	5.24363	4.30801	3.82294	2.90656	4.83736	3.56783	-1.79753	1.2998	2.36885	1.36969	-2.31258	2.42258	3.26533	1.40709	2.39238		12.5514	1.92265	1.38404	-2.24556	1.10456	1.15855	0.230915	2.40331	-0.131554	-0.919384	10.2928	0.0751801	1.1489	0.206394	-2.45239	1.58157	-0.754517
	12.5616	5.73587	3.88471	-1.75951	5.12059	-0.0620346	2.76849	0.675755	0.543861	3.79172	1.6939	1.0275	4.86607	2.6847	0.615578	2.74184	5.09195	4.30574	3.88503	2.87768	4.49808	3.65253	-1.79146	1.23934	2.33255	1.2293	-2.39731	2.22964	3.23772	1.40351	2.31942		12.5616	2.08604	1.43467	-2.28322	1.07971	1.14147	0.333973	2.40977	-0.0872688	-0.963299	10.5335	0.0210915	1.02373	0.0311432	-2.3948	1.60009	-0.7533
	12.5719	5.64967	3.46331	-1.86054	5.07928	-0.000831604	2.67438	0.566105	0.466103	3.77888	1.75083	0.984745	4.82861	2.62343	0.579433	2.59591	4.97643	4.34568	3.79558	2.91728	4.29945	3.676	-1.8027	1.11387	2.4035	1.1294	-2.41723	2.04124	3.26611	1.39475	2.33691		12.5719	2.15757	1.48586	-2.20869	1.15605	1.05629	0.402348	2.38541	-0.0934906	-0.918884	10.8131	-0.138363	0.780766	-0.0202827	-2.42958	1.62263	-0.725262
	12.5821	5.54774	3.02265	-1.90528	5.035	-0.00798416	2.67272	0.487831	0.299553	3.69582	1.71286	1.11368	4.83444	2.58062	0.585655	2.38689	4.78352	4.40139	3.76995	3.0651	4.09878	3.70834	-1.78725	1.07894	2.3624	1.10265	-2.25758	1.88299	3.31115	1.47089	2.3883		12.5821	2.34018	1.52374	-2.25773	1.14297	1.07244	0.504581	2.41413	-0.0948257	-0.931362	11.0747	-0.265533	0.667255	-0.140507	-2.40372	1.61113	-0.746555
	12.5924	5.52682	2.61456	-1.96209	4.91714	0.0376854	2.65511	0.622063	0.284939	3.62084	1.65296	1.23686	4.87589	2.53066	0.551178	2.24073	4.61706	4.45594	3.66954	3.11679	3.96172	3.72078	-1.73168	1.08482	2.34479	0.8405	-2.15118	1.75098	3.39882	1.54418	2.36423		12.5924	2.61943	1.5511	-2.22634	1.22384	1.087	0.514633	2.38486	-0.104565	-0.910206	11.4094	-0.336117	0.624187	-0.253086	-2.37694	1.61411	-0.685806
	12.6026	5.38829	2.17516	-1.99477	4.79663	0.0827255	2.53738	0.557522	0.211697	3.64275	1.54951	1.26713	4.80713	2.512	0.587574	2.2673	4.49087	4.56659	3.67358	3.03275	3.68855	3.71633	-1.67036	1.08298	2.21142	0.619118	-2.12565	1.63421	3.46323	1.59201	2.29498		12.6026	2.88881	1.4896	-2.22728	1.22136	1.13302	0.479668	2.30785	-0.0519218	-0.8717	11.7717	-0.471729	0.598579	-0.408154	-2.38819	1.61262	-0.725811
	12.6128	5.39543	1.76672	-2.11977	4.62659	0.143829	2.45524	0.561718	0.0758667	3.58371	1.61318	1.37129	4.81624	2.42097	0.623028	2.30835	4.35434	4.58506	3.5666	2.97746	3.42995	3.81974	-1.5635	1.0832	2.27478	0.51741	-2.00277	1.52196	3.64323	1.61501	2.28648		12.6128	3.03304	1.59356	-2.27665	1.20231	1.20308	0.534649	2.37214	0.0860863	-0.841419	12.0387	-0.640209	0.49823	-0.513142	-2.44268	1.50821	-0.73082
	12.6231	5.32565	1.46428	-2.23959	4.49781	0.236992	2.42805	0.507095	0.0167885	3.46802	1.56612	1.3992	4.7912	2.36231	0.54987	2.35864	4.17656	4.59991	3.48145	2.96645	3.21252	3.84756	-1.53963	1.02213	2.34557	0.298122	-1.93865	1.47683	3.80252	1.68761	2.25565		12.6231	3.22415	1.69484	-2.24766	1.28443	1.10467	0.551159	2.36089	0.295979	-0.96019	12.2634	-0.780922	0.335041	-0.678963	-2.44001	1.51967	-0.720543
	12.6333	5.36551	1.12582	-2.28643	4.30886	0.255936	2.36993	0.466995	-0.00839996	3.46666	1.52374	1.30038	4.82414	2.27929	0.486187	2.26082	4.05816	4.55703	3.44641	2.92588	3.09148	3.7504	-1.4664	0.877121	2.2843	0.180271	-1.75197	1.41261	3.9543	1.65943	2.23136		12.6333	3.26895	1.58606	-2.31884	1.243	1.08717	0.613613	2.36763	0.533466	-1.01437	12.3707	-0.893108	0.26049	-0.781601	-2.45613	1.36798	-0.663132
	12.6436	5.16448	0.720146	-2.43506	4.18096	0.1884	2.1653	0.418476	-0.0672531	3.38827	1.45697	1.24873	4.7805	2.27037	0.465515	2.2109	3.81643	4.58297	3.39635	2.9308	2.94495	3.66154	-1.31949	0.876133	2.37368	0.237862	-1.76085	1.37892	3.89914	1.64032	2.24844		12.6436	3.40197	1.57136	-2.23501	1.29547	1.16679	0.776501	2.36956	0.641354	-1.02279	12.4391	-1.03373	0.158195	-0.938923	-2.47893	1.35582	-0.639957
	12.6538	5.01521	0.391083	-2.44356	4.07299	0.245811	2.14619	0.29966	-0.200245	3.36509	1.39343	1.26993	4.76119	2.26404	0.498428	2.09966	3.64322	4.59838	3.37909	2.86937	2.69224	3.54834	-1.23769	0.915115	2.31569	0.191692	-1.75409	1.23223	3.94893	1.69021	2.14261		12.6538	3.51566	1.49063	-2.16231	1.34231	1.20758	0.953526	2.46108	0.72673	-0.991505	12.5771	-1.09922	0.129848	-0.948147	-2.36485	1.25338	-0.616344
	12.664	4.85183	0.00813293	-2.37923	3.92902	0.140991	2.1392	0.162403	-0.133461	3.40697	1.23011	1.31407	4.62673	2.16562	0.520245	2.00799	3.45732	4.60591	3.42707	2.8316	2.45781	3.55753	-1.19737	0.80891	2.23673	0.0666771	-1.70225	1.17825	3.93929	1.7755	2.0402		12.664	3.72337	1.60735	-2.00743	1.28465	1.17286	0.93755	2.50647	0.770489	-0.852554	12.6355	-1.16062	0.00364304	-1.08066	-2.23787	1.17325	-0.662262
	12.6743	4.69976	-0.26947	-2.26308	3.80708	0.15271	2.09041	0.085968	-0.0737381	3.25953	1.1329	1.46111	4.47216	2.15697	0.49651	1.90314	3.28337	4.57447	3.44403	2.75203	2.21378	3.6479	-1.17132	0.725666	2.09679	0.0144882	-1.63449	1.0454	3.97768	1.98203	2.07619		12.6743	3.82501	1.68794	-1.99746	1.26458	1.0923	0.976723	2.36643	0.95715	-0.765903	12.7157	-1.26593	-0.0706863	-1.22731	-2.20028	1.04546	-0.594109
	12.6845	4.51096	-0.476311	-2.25339	3.81574	0.186722	2.07725	0.00670242	-0.152451	3.06557	1.01563	1.46597	4.39537	2.20006	0.486355	1.88174	3.13484	4.49245	3.30501	2.70254	2.07371	3.61671	-1.12366	0.743847	2.07996	-0.0577316	-1.5074	1.21854	4.06708	2.17308	1.97931		12.6845	3.92257	1.77438	-1.95383	1.33464	1.00157	0.971668	2.2626	1.15258	-0.774487	12.6792	-1.43261	-0.0723076	-1.47225	-2.2646	0.980015	-0.420742
	12.6948	4.32859	-0.646828	-2.31878	3.82506	0.326233	1.92212	-0.0727844	-0.220917	2.99006	0.809349	1.50575	4.44066	2.07553	0.405529	1.85193	3.03206	4.35543	3.22141	2.60953	1.85992	3.6502	-1.03151	0.821213	2.14947	-0.234684	-1.42833	1.33636	4.12789	2.27902	1.93627		12.6948	4.04912	1.78358	-1.92695	1.39244	0.976627	1.09011	2.168	1.30863	-0.816124	12.6781	-1.46058	-0.107571	-1.63116	-2.17297	1.05171	-0.329262
	12.705	4.19529	-0.759827	-2.39776	3.75497	0.525146	1.82161	-0.070282	-0.284107	2.92379	0.729015	1.51296	4.497	2.04784	0.362267	1.75999	2.88743	4.27354	3.21293	2.50113	1.6324	3.71464	-0.95945	0.909618	2.22923	-0.369987	-1.38777	1.03325	4.03451	2.33984	1.81878		12.705	4.19493	1.83029	-1.79412	1.42778	0.91209	1.15894	2.17669	1.41811	-0.867268	12.6277	-1.6283	-0.1404	-1.68451	-2.18626	0.980263	-0.189823
	12.7152	4.01867	-1.0083	-2.38931	3.52749	0.466492	1.88741	-0.12215	-0.288174	2.82947	0.67115	1.59795	4.41716	1.97182	0.431946	1.79279	2.71201	4.18887	3.16851	2.48422	1.44796	3.69239	-0.747093	0.957626	2.10952	-0.583813	-1.36056	0.691143	3.9854	2.36214	1.78913		12.7152	4.36159	1.85496	-1.8329	1.41737	0.917416	1.25412	2.06503	1.47846	-0.956898	12.3962	-1.68356	-0.156193	-1.6222	-2.18168	0.937634	-0.0732841
	12.7255	3.90508	-1.20859	-2.56004	3.31397	0.494591	1.80617	-0.243721	-0.326591	2.72598	0.543541	1.6686	4.18724	2.00677	0.418251	1.74129	2.46969	4.23888	3.18224	2.44623	1.18811	3.64051	-0.631767	1.04932	2.04291	-0.663811	-1.3705	0.385323	4.05364	2.46357	1.76097		12.7255	4.55144	1.87995	-1.75173	1.41751	0.853199	1.21667	1.99453	1.63904	-0.833076	12.069	-1.76093	-0.188858	-1.59839	-2.19048	0.899738	0.0468674
	12.7357	3.82821	-1.44256	-2.54601	3.06359	0.520603	1.76649	-0.273403	-0.403923	2.68264	0.502937	1.75041	3.97987	2.07022	0.498253	1.7548	2.35167	4.32462	3.1577	2.3597	1.11382	3.55982	-0.437996	1.25001	1.92297	-0.664993	-1.29035	0.318066	4.11482	2.52364	1.5985		12.7357	4.58038	1.78366	-1.72325	1.2817	0.821358	1.11977	1.95877	1.74344	-0.70129	11.8276	-1.85195	-0.37846	-1.55473	-2.29681	0.889473	0.0534477
	12.746	3.65013	-1.57037	-2.55558	2.87463	0.507252	1.72065	-0.183517	-0.329563	2.60829	0.521912	1.71313	3.94073	2.06013	0.514107	1.69657	2.17112	4.32886	3.13754	2.31433	1.00731	3.48027	-0.273678	1.32717	1.80654	-0.675903	-1.27244	0.158897	4.166	2.708	1.55907		12.746	4.66143	1.81723	-1.67779	1.19304	0.804836	1.06517	1.91336	1.87169	-0.557606	11.564	-1.88503	-0.48259	-1.63527	-2.2026	0.85638	0.132473
	12.7562	3.43316	-1.88316	-2.49337	2.76786	0.544968	1.69431	-0.236687	-0.111923	2.50645	0.494102	1.75972	3.87725	1.97353	0.45475	1.69605	1.85342	4.26574	3.14462	2.23495	0.885811	3.36565	-0.0779724	1.37929	1.85946	-0.60651	-1.23225	0.0501556	4.20146	2.83208	1.60107		12.7562	4.71707	1.9097	-1.59063	1.19419	0.776096	0.982159	1.90306	2.08026	-0.472637	11.2905	-1.95713	-0.519043	-1.72734	-2.07371	0.807568	0.203724
	12.7664	3.2456	-2.0125	-2.60127	2.63809	0.49836	1.72252	-0.373299	-0.047226	2.54675	0.509075	1.78832	3.69442	1.90983	0.451523	1.61299	1.64373	4.17747	3.20813	2.1773	0.706924	3.22835	0.00578308	1.43975	1.83211	-0.639587	-1.10847	-0.168869	4.17073	2.90143	1.6555		12.7664	4.82241	1.89437	-1.52383	1.1542	0.766998	1.07235	1.85382	2.18412	-0.468224	10.9218	-2.19718	-0.582378	-1.81446	-2.11691	0.86327	0.273174
	12.7767	3.12711	-2.153	-2.65369	2.52509	0.654224	1.72924	-0.349316	-0.0224457	2.59089	0.406219	1.80154	3.4864	1.87727	0.446083	1.54779	1.48237	4.05735	3.07653	2.07616	0.379757	3.12727	0.224606	1.41739	1.88177	-0.77655	-1.08504	-0.33638	4.1824	2.9188	1.64744		12.7767	4.84258	1.85894	-1.35304	1.15018	0.754185	1.11136	1.71414	2.2971	-0.497978	10.631	-2.26579	-0.890499	-1.92441	-2.23039	1.01095	0.420982
	12.7869	2.96283	-2.30315	-2.6658	2.33165	0.752094	1.68723	-0.382397	0.116592	2.62347	0.28997	1.88892	3.36625	1.84322	0.408226	1.55898	1.39268	3.91355	3.0097	2.11733	0.246483	3.09896	0.502708	1.41215	1.90829	-0.878319	-0.97216	-0.431679	4.14885	2.90297	1.50242		12.7869	4.85031	1.72265	-1.27185	1.1363	0.753681	1.13134	1.57124	2.39212	-0.623352	10.1819	-2.24771	-0.947815	-1.85762	-2.24411	1.02567	0.488907
	12.7972	2.79751	-2.4388	-2.56696	2.13722	0.770645	1.62993	-0.473534	0.351837	2.53853	0.0142746	1.88215	3.26577	1.73758	0.256302	1.48315	1.17498	3.82595	2.88577	2.05663	-0.0308456	2.97427	0.652245	1.3527	1.96747	-0.939007	-0.774975	-0.47998	4.03779	2.93637	1.47962		12.7972	4.91503	1.75953	-1.20322	1.17412	0.725513	1.18541	1.42483	2.59198	-0.683159	9.70389	-2.15891	-0.945454	-1.81698	-2.38841	1.05553	0.58865
	12.8074	2.60977	-2.45659	-2.4927	1.94229	0.806908	1.64835	-0.467094	0.446823	2.47388	-0.126453	1.86011	3.19174	1.65755	0.198547	1.40126	0.96077	3.73503	2.8328	2.01918	-0.211464	2.90367	0.729897	1.3369	2.06079	-0.932999	-0.703606	-0.49934	3.97916	2.99625	1.37951		12.8074	4.96418	1.73861	-1.15567	1.16482	0.690514	1.339	1.24357	2.79077	-0.627522	9.17645	-2.10969	-0.946789	-1.77468	-2.47612	1.11222	0.710682
	12.8176	2.54593	-2.53301	-2.53911	1.6173	0.847439	1.57937	-0.463757	0.588959	2.2946	-0.251957	1.86199	2.97903	1.48822	0.197807	1.47033	0.79351	3.63353	2.86195	1.83807	-0.412247	2.72993	0.744549	1.43412	2.07372	-0.911518	-0.676842	-0.569542	3.90188	3.07241	1.36365		12.8176	4.97075	1.82417	-1.13737	1.15602	0.663406	1.34832	1.08923	2.89387	-0.638538	8.61514	-2.09056	-0.97633	-1.85337	-2.49968	1.11745	0.837879
	12.8279	2.45097	-2.54922	-2.68135	1.38017	1.02501	1.53442	-0.456245	0.72525	2.09961	-0.349625	1.73414	2.76892	1.3652	0.183754	1.5745	0.720768	3.43007	2.89862	1.64182	-0.561844	2.56767	0.882034	1.53551	2.15062	-0.796673	-0.599144	-0.652191	3.8372	3.15339	1.24159		12.8279	4.94738	1.82093	-0.989445	1.01238	0.58556	1.34874	1.00806	2.89926	-0.64867	8.05989	-2.15635	-0.95821	-1.80111	-2.55663	1.12492	0.793999
	12.8381	2.2255	-2.65017	-2.64062	1.23144	1.03076	1.58863	-0.398514	0.863976	1.93542	-0.456997	1.71892	2.50666	1.31128	0.116447	1.47161	0.616734	3.24522	3.02995	1.54134	-0.613411	2.63485	1.06504	1.63111	2.18118	-0.919136	-0.484879	-0.675007	3.80961	3.29565	1.18581		12.8381	5.02495	1.74978	-0.880436	0.939827	0.481552	1.28279	1.08562	2.86056	-0.665768	7.49585	-2.1404	-0.931171	-1.72242	-2.41619	1.15927	0.932354
	12.8484	2.0998	-2.73249	-2.56658	1.11739	1.03632	1.51437	-0.459061	1.01357	1.74151	-0.567314	1.70094	2.33006	1.26592	0.184792	1.38068	0.526455	3.05381	3.15084	1.43438	-0.702042	2.59795	1.3203	1.6263	2.22031	-0.914474	-0.501686	-0.702591	3.82034	3.4157	1.05546		12.8484	4.98906	1.77988	-0.962467	0.817196	0.445286	1.27124	1.0747	2.89947	-0.61993	6.95707	-2.20127	-0.923653	-1.75176	-2.46171	1.2073	1.19345
	12.8586	2.03747	-2.67355	-2.54316	0.939133	1.06959	1.57249	-0.460381	1.20417	1.66806	-0.662346	1.67509	2.23793	1.18738	0.171284	1.32327	0.372295	2.99402	3.20801	1.34394	-0.729557	2.64069	1.46127	1.60041	2.34129	-0.953873	-0.53315	-0.808712	3.63323	3.51413	1.05761		12.8586	5.08835	1.75301	-0.955921	0.815884	0.351711	1.34171	0.955006	3.04781	-0.615505	6.39374	-2.30011	-0.971478	-1.81343	-2.40512	1.22431	1.37969
	12.8688	1.94588	-2.70878	-2.60352	0.718861	1.08662	1.57351	-0.480862	1.23302	1.58254	-0.851128	1.66593	2.06863	1.12978	0.116531	1.4156	0.355476	3.08136	3.28391	1.12363	-0.845238	2.57335	1.62573	1.57332	2.46435	-0.969154	-0.618416	-0.979935	3.53446	3.48548	1.06118		12.8688	5.10392	1.74664	-1.00356	0.761253	0.308102	1.34296	0.826374	3.10126	-0.567169	5.99299	-2.27445	-0.979977	-1.91714	-2.40695	1.35263	1.44455
	12.8791	1.76014	-2.89058	-2.64176	0.516216	1.09525	1.58236	-0.56295	1.3558	1.53505	-0.9142	1.70387	1.79716	1.18975	-0.0486336	1.49234	0.38871	3.08602	3.37653	1.01815	-1.00621	2.48081	1.83106	1.58548	2.57277	-0.956257	-0.594982	-1.22028	3.4941	3.4683	0.930706		12.8791	5.17604	1.70837	-0.923344	0.77874	0.331707	1.28798	0.722439	3.15122	-0.594826	5.52667	-2.24187	-0.962444	-1.98506	-2.46306	1.44553	1.37794
	12.8893	1.78663	-2.91171	-2.63251	0.457363	1.17155	1.50465	-0.700672	1.43613	1.38011	-1.06319	1.7427	1.50745	1.18166	-0.129421	1.49908	0.380222	3.1034	3.45427	0.881676	-1.14795	2.20006	1.91383	1.59147	2.68809	-0.908371	-0.463314	-1.33144	3.42402	3.50867	0.7561		12.8893	5.18835	1.74591	-0.875286	0.819675	0.210052	1.41269	0.575153	3.14676	-0.580601	5.11035	-2.27352	-1.04336	-1.90554	-2.49631	1.33171	1.37072
	12.8996	1.78383	-2.91547	-2.62757	0.331299	1.20752	1.35126	-0.742432	1.59142	1.30247	-1.07696	1.62263	1.36384	1.21535	-0.0946579	1.44496	0.264481	2.99059	3.48722	0.738934	-1.19471	2.13051	1.93964	1.56277	2.67899	-0.880608	-0.324493	-1.40084	3.28091	3.54827	0.586906		12.8996	5.12111	1.71001	-0.788063	0.783329	0.106541	1.39923	0.387604	3.18309	-0.492542	4.54394	-2.35981	-1.03172	-1.87703	-2.60274	1.29842	1.44537
	12.9098	1.72656	-3.01875	-2.60478	0.125591	1.24182	1.21285	-0.755974	1.66739	1.09828	-1.0717	1.58303	1.28851	1.17761	-0.146851	1.42701	0.214905	2.95267	3.56231	0.696701	-1.24525	2.18919	1.97968	1.62107	2.70846	-0.872536	-0.260979	-1.4495	3.04394	3.48251	0.477509		12.9098	5.03905	1.6759	-0.661846	0.75359	0.0827255	1.37675	0.281853	3.23071	-0.494915	4.00184	-2.49999	-1.0457	-1.83512	-2.53722	1.22227	1.51917
	12.92	1.6818	-3.03754	-2.59182	0.00409317	1.3285	1.1785	-0.837563	1.72053	0.926712	-1.22308	1.51111	1.16746	1.12641	-0.131496	1.27393	0.158852	2.70049	3.58715	0.668182	-1.24215	2.06962	2.04943	1.62819	2.71207	-0.828476	-0.198692	-1.49071	2.87835	3.46164	0.384682		12.92	5.00887	1.61102	-0.614925	0.658207	0.101917	1.35494	0.142056	3.33032	-0.556786	3.47088	-2.54525	-1.14838	-1.84052	-2.47579	1.18999	1.70421
	12.9303	1.61229	-3.06991	-2.59515	-0.162991	1.23413	1.19142	-0.835773	1.7645	0.764683	-1.33096	1.37506	1.01749	1.11864	-0.0904884	1.233	0.043766	2.56004	3.70399	0.620598	-1.36934	1.93507	2.04218	1.57081	2.73244	-0.772629	-0.0223846	-1.57035	2.77985	3.56026	0.478798		12.9303	4.93034	1.74021	-0.520748	0.611347	0.134426	1.32007	0.0342903	3.42286	-0.652569	2.98603	-2.41912	-1.15765	-1.8504	-2.43134	1.12785	1.88894
	12.9405	1.47908	-3.11123	-2.52074	-0.300953	1.23297	1.03698	-0.892826	1.97932	0.618069	-1.34533	1.26695	0.86866	1.13341	-0.0910606	1.2471	-0.121674	2.49769	3.76033	0.365654	-1.44938	1.86774	2.09086	1.52381	2.73984	-0.675568	0.0592728	-1.53409	2.66473	3.60764	0.509766		12.9405	4.91645	1.71004	-0.484509	0.537281	0.00587082	1.3798	-0.0661659	3.35015	-0.743526	2.51075	-2.337	-1.11345	-1.95755	-2.46707	1.19104	1.95207
	12.9508	1.41192	-3.18914	-2.48331	-0.400623	1.23985	0.922913	-0.829525	2.12127	0.485233	-1.43772	1.25804	0.789421	1.2109	-0.290939	1.23758	-0.214691	2.39969	3.73686	0.199619	-1.4808	1.93362	2.30378	1.59956	2.77451	-0.586174	0.133888	-1.52349	2.58303	3.63528	0.511269		12.9508	4.87817	1.54433	-0.533276	0.469189	-0.021534	1.37855	-0.149113	3.35316	-0.77763	2.0349	-2.28823	-1.11137	-1.93859	-2.48994	1.29285	1.98997
[truncated: 200 more rows]
[truncated: 14 more columns]

## Sheet: panel B
	Top panel
[truncated: 1,173 more rows]
[truncated: 53 more columns]

## Sheet: panel C
		Mon. ipsi				Mon. contra				Binaural
			Spikes/click				Spikes/click				Spikes/click
		Sound intensity	mean	s.e.m.		Sound intensity	mean	s.e.m.		Sound intensity	mean	s.e.m.
		-10	0.0667	0.0463		-10	0.2	0.0743		-10	0.2	0.1114
[truncated: 18 more rows]

## Sheet: panel D
		Mon. ipsi				Mon. contra				Binaural
[truncated: 21 more rows]

[truncated: 2 more sheets: panel E, panel F]
