# Supplementary material for: Glycinergic axonal inhibition subserves acute spatial sensitivity to sudden increases in sound intensity
Source: eLife journal article supplement (doi:10.7554/elife.62183), 2021-06-14
Supplement: supp [file elife-62183-supp-v1.zip › elife_poa_e62183_Figure_4_figure_supplement_1_source_data_1.xlsx]

## Sheet: panel A
		Lead of inhibition (ms)	Time re. simIPSC (ms)	Vm (mV)	Vm (mV)	Vm (mV)	Vm (mV)	Vm (mV)	Vm (mV)	Vm (mV)	Vm (mV)	Vm (mV)	Vm (mV)	Vm (mV)	Vm (mV)	Vm (mV)	Vm (mV)	Vm (mV)	Vm (mV)	Vm (mV)	Vm (mV)	Vm (mV)	Vm (mV)	Vm (mV)	Vm (mV)	Vm (mV)	Vm (mV)	Vm (mV)	Vm (mV)	Vm (mV)	Vm (mV)	Vm (mV)
		-0.24	0	-61.8125	-61	-61.625	-61.8125	-63.7188	-63.125	-63.3438	-63.4062	-63.2812	-62.5	-63.2188	-62.7188	-62.9062	-62.9688	-63	-62.9375	-63.2812	-63.2188	-63.125	-63	-63.2188
		-0.24	0.02	-61.625	-60.8438	-61.375	-61.5312	-63.4375	-62.75	-63.0625	-63.0625	-63	-62.2188	-63	-62.5	-62.6562	-62.8125	-62.875	-62.6875	-62.9375	-63	-62.7812	-62.7812	-62.875
		-0.24	0.04	-61.4062	-60.5312	-61.2812	-61.375	-63.2188	-62.5	-62.875	-62.9688	-62.8438	-62.0625	-62.75	-62.3125	-62.5	-62.625	-62.5625	-62.5	-62.6562	-62.8125	-62.5938	-62.5	-62.6562
		-0.24	0.06	-61.1562	-60.4062	-61	-61.1875	-63.0312	-62.3438	-62.7188	-62.9062	-62.6875	-61.9688	-62.5938	-62.0938	-62.3125	-62.5	-62.5	-62.3438	-62.5625	-62.5	-62.5	-62.4688	-62.5938
		-0.24	0.08	-61.125	-60.25	-60.8125	-61.0938	-62.875	-62.3125	-62.625	-62.7188	-62.5938	-61.8125	-62.5938	-62.0938	-62.3125	-62.3125	-62.3438	-62.1875	-62.4688	-62.5625	-62.4375	-62.375	-62.5
		-0.24	0.1	-61	-60.125	-60.8125	-60.9375	-62.8438	-62.1875	-62.5	-62.5312	-62.5	-61.8125	-62.5312	-61.9688	-62.2812	-62.25	-62.2812	-62.2188	-62.4375	-62.4688	-62.2812	-62.25	-62.4062
		-0.24	0.12	-60.9062	-60.0938	-60.6875	-60.875	-62.8125	-62	-62.4375	-62.5312	-62.5	-61.6562	-62.4375	-61.9375	-62.1562	-62.1875	-62.1875	-62.0938	-62.375	-62.4688	-62.2812	-62.1875	-62.25
		-0.24	0.14	-60.875	-59.9062	-60.5312	-60.7812	-62.6875	-62.0312	-62.3438	-62.5	-62.4375	-61.6562	-62.4062	-61.8438	-62	-62.1562	-62.1562	-62.0312	-62.2812	-62.3125	-62.2188	-62.0938	-62.2188
		-0.24	0.16	-60.875	-59.875	-60.5312	-60.7812	-62.625	-62.0312	-62.25	-62.5	-62.4062	-61.5312	-62.4375	-61.8125	-62.0312	-62.0625	-62.125	-61.9688	-62.375	-62.3438	-62.0312	-62.125	-62.125
		-0.24	0.18	-60.75	-59.9375	-60.4688	-60.5938	-62.5938	-61.9375	-62.2188	-62.4062	-62.375	-61.5625	-62.25	-61.8438	-62.0312	-62.0938	-62	-61.9688	-62.2812	-62.2812	-62.125	-62.0938	-62.2188
		-0.24	0.2	-60.7188	-59.7812	-60.4375	-60.5625	-62.5	-61.9688	-62.125	-62.4375	-62.375	-61.4688	-62.3125	-61.7812	-62.0312	-62.0312	-62.0312	-62	-62.1875	-62.25	-62.125	-62.0625	-62.0625
		-0.24	0.22	-60.7188	-59.8125	-60.4062	-60.625	-62.4688	-61.875	-62	-62.375	-62.25	-61.5	-62.4062	-61.625	-61.9688	-62	-62.0625	-61.9688	-62.2188	-62.2188	-62.125	-62	-62.0938
		-0.24	0.24	-60.7188	-59.8125	-60.3438	-60.5938	-62.4375	-61.8438	-62	-62.4062	-62.2812	-61.4688	-62.25	-61.6562	-61.9062	-62.0312	-61.9688	-61.9062	-62.125	-62.1875	-62.0938	-62	-62.1562
		-0.24	0.26	-60.7188	-59.8125	-60.3438	-60.5625	-62.4062	-61.8125	-62.0312	-62.3438	-62.2188	-61.4375	-62.2188	-61.75	-61.8438	-62	-61.9688	-61.8125	-62.1562	-62.0625	-62.0312	-61.9062	-62.0312
		-0.24	0.28	-60.7188	-59.75	-60.2812	-60.625	-62.4062	-61.7812	-62.1562	-62.2812	-62.2188	-61.4688	-62.25	-61.625	-61.8438	-61.9688	-62.0312	-61.8438	-62.0312	-62.1562	-62.0312	-61.9062	-62
		-0.24	0.3	-60.7812	-59.7188	-60.2812	-60.5938	-62.4688	-61.75	-62	-62.375	-62.1562	-61.375	-62	-61.5938	-61.8438	-62	-62.0312	-61.7812	-62.0312	-62.0625	-62	-61.875	-62.125
		-0.24	0.32	-60.5312	-59.6875	-60.2812	-60.5	-62.4062	-61.7188	-62.0312	-62.3125	-62.1562	-61.2812	-62	-61.5938	-61.9375	-61.9688	-61.9688	-61.7188	-62.0625	-62.0312	-62.0625	-61.9375	-62.0312
		-0.24	0.34	-60.625	-59.75	-60.2188	-60.5	-62.375	-61.6875	-62.0312	-62.2812	-62.1562	-61.3438	-62.2812	-61.5625	-61.8438	-62	-62	-61.7812	-62.0938	-62.0312	-61.9375	-61.9062	-62
		-0.24	0.36	-60.6562	-59.6562	-60.1875	-60.5	-62.4062	-61.7188	-61.8438	-62.2812	-62.1562	-61.3438	-62.0625	-61.5312	-61.7812	-61.9375	-61.9688	-61.7812	-62.0312	-61.9688	-61.9062	-61.9375	-62.0938
		-0.24	0.38	-60.6562	-59.625	-60.2188	-60.4375	-62.3438	-61.6562	-61.9688	-62.25	-62.1562	-61.3438	-62.0938	-61.625	-61.7812	-61.9062	-61.9375	-61.8438	-62.0625	-62	-62	-61.9062	-62.0938
		-0.24	0.4	-60.5938	-59.5938	-60.1562	-60.4062	-62.4375	-61.625	-62	-62.2812	-62.0625	-61.4062	-62.1875	-61.5312	-61.8438	-61.9062	-62	-61.8438	-62	-62.125	-61.9688	-61.8438	-62.0312
		-0.24	0.42	-60.5938	-59.5938	-60.2188	-60.4688	-62.4688	-61.6562	-61.9375	-62.3125	-62.125	-61.4062	-62.0938	-61.5625	-61.75	-61.8125	-62.0312	-61.7812	-61.9688	-62.0625	-61.9062	-61.875	-62
		-0.24	0.44	-60.5312	-59.6562	-60.25	-60.4375	-62.3438	-61.6562	-61.9375	-62.1875	-62	-61.3438	-62.0312	-61.625	-61.75	-61.8438	-61.9688	-61.7188	-61.9688	-62.0312	-62	-61.8438	-62.0625
		-0.24	0.46	-60.5	-59.6562	-60.1875	-60.3438	-62.3438	-61.6875	-61.9062	-62.25	-62.1875	-61.3125	-62.0625	-61.5312	-61.8125	-61.8438	-62.0625	-61.75	-62	-62.0938	-61.9062	-61.8125	-62.0312
		-0.24	0.48	-60.5	-59.625	-60.25	-60.4375	-62.375	-61.6875	-61.9688	-62.3125	-62.125	-61.2188	-62.0625	-61.5	-61.8125	-61.9062	-61.9688	-61.8125	-61.9688	-62.0938	-62	-61.8438	-61.9688
		-0.24	0.5	-60.5312	-59.5938	-60.2188	-60.5	-62.2812	-61.625	-61.875	-62.125	-62.0625	-61.3125	-62.0312	-61.5312	-61.8125	-61.8125	-61.9688	-61.7188	-61.9375	-62	-62	-61.9688	-61.9375
		-0.24	0.52	-60.5312	-59.5938	-60.1875	-60.375	-62.3438	-61.6875	-62	-62.1875	-62	-61.3438	-62	-61.5	-61.7812	-61.8438	-61.9375	-61.75	-62	-61.9688	-61.9375	-61.9062	-62
		-0.24	0.54	-60.5312	-59.5938	-60.1562	-60.2812	-62.4062	-61.625	-62	-62.2812	-62.1562	-61.4062	-62.0312	-61.4375	-61.6875	-61.9375	-62	-61.6875	-62.0312	-62.0312	-61.9062	-61.9062	-62
		-0.24	0.56	-60.5	-59.5938	-60.2188	-60.375	-62.3438	-61.5938	-61.9375	-62.2188	-62.0938	-61.375	-61.9062	-61.375	-61.6875	-61.8438	-61.9375	-61.6875	-62	-61.9375	-61.8125	-61.875	-62.0938
		-0.24	0.58	-60.5625	-59.625	-60.0938	-60.3438	-62.375	-61.6562	-62	-62.125	-62.0312	-61.4062	-62	-61.25	-61.625	-61.6562	-61.8438	-61.5938	-61.9688	-61.875	-61.9062	-61.8438	-61.9062
		-0.24	0.6	-60.5312	-59.5938	-60.0312	-60.3438	-62.375	-61.6562	-61.9375	-61.9375	-62.0625	-61.375	-61.7812	-61.25	-61.5938	-61.6875	-61.8438	-61.5	-62.0625	-61.7812	-62.0312	-61.6875	-61.9062
		-0.24	0.62	-60.5	-59.5	-60	-60.2812	-62.2812	-61.5625	-61.9688	-62.125	-62.125	-61.2812	-61.6562	-61.0625	-61.4375	-61.5938	-61.7188	-61.4688	-62.0312	-61.6875	-61.9688	-61.625	-61.8438
		-0.24	0.64	-60.4062	-59.4062	-59.9062	-60.25	-62.125	-61.5938	-61.9062	-61.9375	-62	-61.2812	-61.5938	-60.9062	-61.25	-61.4688	-61.5312	-61.3438	-62.125	-61.4688	-61.9375	-61.5	-61.8125
		-0.24	0.66	-60.3125	-59.375	-59.75	-60.125	-62.0938	-61.4062	-61.875	-61.8125	-62	-61.0312	-61.4688	-60.7188	-61.2188	-61.2188	-61.3438	-61.2188	-62	-61.4062	-62	-61.4062	-61.5625
		-0.24	0.68	-60.1875	-59.0938	-59.625	-60.0312	-61.8125	-61.4375	-61.9062	-61.6875	-62.0625	-60.9062	-61.2188	-60.5625	-61.0938	-61.125	-61.0938	-61.1562	-61.7188	-61.0625	-61.875	-61.3125	-61.5
		-0.24	0.7	-60.0312	-58.875	-59.5	-60	-61.7188	-61.375	-61.7812	-61.4688	-61.9375	-60.7812	-61.1562	-60.4375	-60.9062	-60.875	-60.8438	-61	-61.6562	-60.8125	-61.8438	-61.0938	-61.3438
		-0.24	0.72	-59.8125	-58.75	-59.3125	-59.6875	-61.5938	-61.1875	-61.8125	-61.4375	-61.875	-60.4375	-60.8438	-60.1875	-60.8125	-60.6562	-60.5625	-60.8125	-61.5625	-60.5625	-61.9062	-60.9688	-61
		-0.24	0.74	-59.5312	-58.5312	-59.0938	-59.5312	-61.4062	-61	-61.7188	-61.125	-61.8125	-60.1562	-60.6875	-59.9375	-60.6562	-60.5	-60.5625	-60.6562	-61.4375	-60.1562	-61.7188	-60.8438	-60.9062
		-0.24	0.76	-59.2812	-58.3125	-59.0312	-59.4062	-61.1562	-60.8125	-61.5	-60.9062	-61.75	-59.7812	-60.5312	-60	-60.2812	-60.3125	-60.2188	-60.375	-61.2812	-59.9062	-61.5312	-60.6562	-60.5938
		-0.24	0.78	-59	-58	-58.8438	-59.1562	-60.9062	-60.5312	-61.3125	-60.625	-61.5	-59.4062	-60.4375	-59.7188	-60	-59.9062	-60.0312	-60.0938	-61	-59.5938	-61.375	-60.4688	-60.4062
		-0.24	0.8	-58.4688	-57.625	-58.6562	-58.9062	-60.5625	-60.0625	-61.0312	-60.2812	-61.3125	-59.0938	-60.1562	-59.4375	-59.625	-59.4062	-59.7188	-59.9062	-60.5312	-59.375	-61.0312	-60.0938	-60
		-0.24	0.82	-57.875	-57.2812	-58.5	-58.5625	-60.3438	-59.6875	-60.6875	-59.6875	-61	-58.6562	-59.75	-59.1562	-59.25	-59	-59.375	-59.4375	-60.1562	-58.9375	-60.5938	-59.5938	-59.5938
		-0.24	0.84	-57.25	-56.875	-58.3438	-58.3125	-59.8438	-59.2188	-60.1875	-59.0312	-60.6562	-58.125	-59.5	-58.5	-58.6562	-58.5	-58.75	-58.8438	-59.4688	-58.4688	-60.2812	-59.0938	-59.0312
		-0.24	0.86	-56.3438	-56.375	-57.9062	-57.75	-59.2812	-58.6562	-59.5312	-58.1562	-60.125	-57.5312	-59	-57.9688	-58.0312	-57.8438	-58.375	-58.1875	-58.7188	-57.9375	-59.625	-58.5	-58.375
		-0.24	0.88	-55.3438	-55.75	-57.5625	-57.0625	-58.6875	-58	-58.9062	-57.3125	-59.4062	-56.875	-58.3438	-57.2188	-57.4688	-57.1875	-57.5625	-57.0938	-57.9062	-57.1562	-59.0312	-57.75	-57.4375
		-0.24	0.9	-54.375	-55.1562	-57.0938	-56.375	-57.9375	-57.1562	-57.7812	-56.2812	-58.5938	-56.0625	-57.5312	-56.2188	-56.7188	-56.5938	-56.8438	-56.125	-56.875	-56.4375	-58.1562	-56.9062	-56.625
		-0.24	0.92	-53.2188	-54.4062	-56.4375	-55.25	-57.0625	-56.3438	-56.7188	-55.3125	-57.7812	-55.1562	-56.5938	-55.1875	-55.9062	-55.875	-55.7812	-54.9062	-55.8125	-55.5625	-57.1562	-56.0625	-55.625
		-0.24	0.94	-51.875	-53.6562	-55.5625	-54.2188	-56.1562	-55.2188	-55.5625	-54.25	-56.7812	-54.1875	-55.5625	-54.0625	-55.125	-55.1875	-54.875	-53.5938	-54.8438	-54.5938	-55.9688	-55	-54.5938
		-0.24	0.96	-50.6562	-52.9688	-54.8438	-53.0938	-55.125	-54.0938	-54.375	-53.375	-55.6875	-53.0625	-54.5625	-52.7812	-54.3438	-54.4375	-53.875	-52.375	-53.7188	-53.5	-54.9062	-54.2812	-53.5938
		-0.24	0.98	-49.375	-52.2812	-53.9688	-52.0312	-54.1562	-52.8125	-53.0625	-52.4375	-54.5312	-52.1562	-53.5	-51.5625	-53.4375	-53.5625	-52.75	-51.2812	-52.7188	-52.5625	-53.5938	-53.25	-52.5
		-0.24	1	-48.0625	-51.7188	-53.125	-51	-53.0938	-51.5938	-52.0938	-51.5	-53.4375	-50.9375	-52.5	-50.6875	-52.6562	-52.75	-51.75	-50.0312	-51.6562	-51.4688	-52.375	-52.375	-51.4688
		-0.24	1.02	-46.8125	-51.0938	-52.5	-50.0938	-52.1875	-50.4375	-51.0938	-50.8125	-52.3125	-49.8438	-51.5938	-49.6562	-51.9688	-51.8438	-50.8125	-48.9688	-50.6875	-50.3125	-51.125	-51.6875	-50.4375
		-0.24	1.04	-45.5938	-50.4688	-51.7812	-49.2812	-51.2812	-49.3125	-50.1875	-50.0938	-51.1875	-48.7812	-50.7188	-48.6562	-51.0312	-50.9688	-49.8125	-47.6875	-49.5938	-49.1562	-49.875	-50.8438	-49.5312
		-0.24	1.06	-44.0938	-49.9688	-51.0312	-48.375	-50.5	-48.1562	-49.3438	-49.3438	-50.0938	-47.4688	-49.7188	-47.5625	-50.2812	-49.9688	-48.9688	-45.7188	-48.4375	-47.875	-48.6562	-50.2188	-48.5625
		-0.24	1.08	-41.5938	-49.4688	-50.375	-47.7188	-49.75	-47.0625	-48.6875	-48.5	-49.0312	-45.5	-48.9062	-45.7188	-49.625	-49.0312	-48.0312	-42.4688	-46.625	-46.125	-47.2812	-49.4375	-47.5
		-0.24	1.1	-37.9688	-49	-49.9375	-47.25	-49.1562	-45.9062	-48.0625	-47.25	-48.0938	-42.4062	-47.7812	-42.625	-48.7812	-47.625	-46.2812	-38.0312	-43.9062	-43.2812	-45.1875	-48.8125	-45.875
		-0.24	1.12	-32.8125	-48.75	-49.4062	-46.6562	-48.5312	-44.125	-47.3125	-44.7812	-46.6875	-37.6875	-45.875	-38.125	-47.625	-45.4375	-43.4062	-32.0312	-39.4688	-39.0938	-41.9375	-48.0625	-42.875
		-0.24	1.14	-25.6562	-48.3438	-48.9688	-45.8125	-47.9375	-41.2812	-46.75	-40.9062	-44	-31.5	-42.625	-32.125	-45.4688	-42.0938	-39.25	-23.625	-33.7188	-33.4062	-37.1875	-46.625	-38.4375
		-0.24	1.16	-16.4062	-48.0312	-48.5625	-44.5	-47.4688	-37.1562	-45.7188	-35.7812	-40.0938	-23.0625	-38.2188	-24.0625	-42.0625	-37.0938	-33.5625	-13.2188	-26.125	-25.75	-30.8438	-44.25	-32.5625
		-0.24	1.18	-6.40625	-47.75	-48.1875	-41.875	-46.8125	-31.5625	-43.7188	-28.8125	-34.6562	-12.5	-32.2812	-13.9688	-37.1562	-30.7188	-26.0625	-2.25	-16.0312	-15.7188	-22.3438	-40.3438	-24.7812
		-0.24	1.2	2.53125	-47.4688	-47.9062	-38.0312	-45.9375	-23.8438	-40.5312	-19.6875	-27.5938	-1.6875	-24.3125	-2.96875	-30.8438	-22.0625	-16.2812	7.28125	-4.8125	-4.625	-11.7812	-35.0938	-14.5625
		-0.24	1.22	9.5	-47.2812	-47.5938	-32.9062	-44.25	-14.4375	-36.0312	-8.875	-17.9688	7.5	-14.1562	6.65625	-22.5	-11.5	-5.3125	13.9375	5.15625	5.25	-0.90625	-28.2188	-3.5
		-0.24	1.24	13.5	-47.0312	-47.3438	-25.9375	-41.3125	-4.78125	-29.9688	1.59375	-7.09375	14.1562	-3.25	13.5	-12.125	-0.625	4.78125	17.125	12.6875	12.6562	8.28125	-19.0312	6.0625
		-0.24	1.26	14.125	-46.6875	-47	-16.8125	-37.1562	3.65625	-21.8125	10.1562	3.15625	17	6.5	17	-1.25	8.5	12.3438	16.5	16.75	16.7188	14.5312	-8.28125	13.25
		-0.24	1.28	11.5938	-45.875	-46.625	-7.09375	-31.5	9.75	-12.3438	15.3438	11.3125	16.2812	13.2188	16.75	7.84375	14.6562	16.5	12.5312	17	17	17.2812	2.1875	16.8438
		-0.24	1.3	6.84375	-44.3125	-45.9375	1.8125	-23.8125	12.7188	-2.9375	17.125	16.125	12.4375	16.7812	13	14.125	17.1562	17.0625	6.25	13.9062	13.6562	16.1875	10.5312	16.75
		-0.24	1.32	0.28125	-41.375	-44.4062	8.875	-14.4375	12.5312	5.0625	15.125	17.2188	6.03125	16.5312	6.8125	16.9062	16.1562	14.1562	-1.5625	8.15625	7.78125	11.9062	15.75	13.2188
		-0.24	1.34	-7.15625	-37.3125	-41.5625	13	-4.8125	9.5625	10.4375	10.25	14.8125	-1.71875	12.9375	-0.8125	16.0938	11.875	8.3125	-10.0625	0.5	0.25	5.25	17.0625	7.15625
		-0.24	1.36	-15	-31.8125	-37.5312	13.7188	3.46875	4.5625	12.625	3.34375	9.53125	-10.2812	6.8125	-9.53125	11.9062	5.21875	1	-18.7812	-7.96875	-8.28125	-2.65625	14.9688	-0.46875
		-0.24	1.38	-22.5	-24.625	-32.0938	11.5312	9.5	-1.9375	11.7812	-4.71875	2.34375	-19.0938	-0.75	-18.3438	5.5	-2.875	-7.4375	-27.2812	-16.875	-16.8438	-11.4062	9.84375	-9.15625
		-0.24	1.4	-29.5938	-15.5938	-24.8438	7.03125	12.5312	-9.34375	8.375	-13.4062	-5.9375	-27.4375	-9.375	-26.8438	-2.46875	-11.5	-16.3125	-34.8438	-25.375	-25.3125	-20.2188	2.65625	-17.9688
		-0.24	1.42	-35.7812	-5.8125	-15.6562	0.84375	12.2812	-16.9062	3	-22.0938	-14.7188	-34.7812	-18.0938	-34.375	-11.125	-20.25	-24.9062	-41.2812	-33.0938	-33.0312	-28.4688	-5.5625	-26.3438
		-0.24	1.44	-41.125	2.8125	-5.90625	-6.59375	9.34375	-24.25	-3.75	-30.0312	-23.3438	-41.2812	-26.5312	-41.0938	-19.7812	-28.5938	-32.6562	-46.6875	-39.9062	-39.75	-35.875	-14.2812	-34.0625
		-0.24	1.46	-45.5938	9.4375	2.8125	-14.2812	4.28125	-31	-11.0625	-37.1562	-31.3438	-46.6562	-34.125	-46.5	-27.9375	-36.0312	-39.4062	-51.1875	-45.5938	-45.375	-42.2188	-23.0312	-40.7812
		-0.24	1.48	-49.4062	13.1875	9.625	-21.8438	-2.3125	-36.8125	-18.5625	-43.2812	-38.4062	-51.0312	-40.8125	-51.0312	-35.3125	-42.3125	-45.2188	-54.5625	-50.1562	-50.0938	-47.5	-31.1562	-46.1875
		-0.24	1.5	-52.375	13.6562	13.3125	-29	-9.53125	-41.9062	-25.7812	-48.3125	-44.2188	-54.5312	-46.2188	-54.6562	-41.8125	-47.5938	-49.8125	-57.375	-53.9688	-53.6562	-51.6562	-38.0625	-50.6875
		-0.24	1.52	-54.6562	11.1875	13.7188	-35.2812	-17.25	-46.2188	-32.3125	-52.25	-49.0938	-57.3125	-50.6875	-57.4375	-47.0312	-51.75	-53.5	-59.5	-56.875	-56.5	-55.0625	-44.1562	-54.4375
		-0.24	1.54	-56.5938	6.5	11.4062	-40.5938	-24.5625	-49.6875	-37.875	-55.4062	-53.0312	-59.375	-54.4375	-59.5625	-51.3125	-55.125	-56.5312	-61.125	-59.0938	-58.8125	-57.625	-49.0312	-57.1562
		-0.24	1.56	-58.2812	0.21875	6.59375	-45.2188	-31.2812	-52.5625	-42.8438	-57.9375	-56.0625	-61.0625	-57.2812	-61.25	-54.8125	-57.7188	-58.75	-62.375	-60.875	-60.5312	-59.75	-53	-59.4062
		-0.24	1.58	-59.4375	-7.0625	0.25	-49.0312	-37.1875	-54.8125	-46.8438	-59.8438	-58.4375	-62.3438	-59.4375	-62.5625	-57.5	-59.8438	-60.5938	-63.4062	-62.1875	-61.8125	-61.2812	-56.125	-61.0938
		-0.24	1.6	-60.3438	-14.6875	-7	-51.9688	-42.125	-56.6562	-50.2812	-61.3438	-60.3438	-63.2812	-61.1875	-63.4688	-59.5312	-61.4375	-62.0938	-64.0625	-63.1562	-62.8438	-62.4688	-58.5938	-62.3125
		-0.24	1.62	-61.1562	-22.3125	-14.6875	-54.4375	-46.375	-58.1562	-53	-62.4688	-61.875	-64.0625	-62.5	-64.1875	-61.1562	-62.5938	-63.0938	-64.5625	-63.9375	-63.8125	-63.4688	-60.4062	-63.2188
		-0.24	1.64	-61.6875	-29.1875	-22.2188	-56.5	-49.7812	-59.1875	-55.2812	-63.25	-62.75	-64.5312	-63.375	-64.625	-62.4062	-63.3125	-63.8438	-64.875	-64.375	-64.2812	-64.125	-61.9062	-64.0312
		-0.24	1.66	-62.0938	-35.4062	-29.1562	-58.0625	-52.5938	-60.0938	-57	-63.9375	-63.5938	-65.0312	-64.125	-65.0938	-63.25	-64.0625	-64.3438	-65.0938	-64.7812	-64.7188	-64.5625	-63	-64.5312
		-0.24	1.68	-62.4062	-40.8125	-35.1875	-59.2812	-54.9062	-60.875	-58.5312	-64.3125	-64.1875	-65.3125	-64.5938	-65.4688	-63.875	-64.5625	-64.9688	-65.25	-65.1562	-65.0312	-64.9688	-63.75	-64.9375
		-0.24	1.7	-62.5938	-45.2812	-40.5625	-60.1562	-56.7812	-61.2188	-59.5938	-64.6562	-64.6562	-65.5312	-65	-65.5	-64.3125	-64.7812	-65.1875	-65.4375	-65.1875	-65.2812	-65.1562	-64.375	-65.2188
		-0.24	1.72	-62.75	-48.9375	-45.125	-60.9375	-58.1562	-61.5625	-60.5938	-64.8125	-64.7812	-65.5938	-65.2188	-65.6562	-64.5625	-65.0938	-65.375	-65.4062	-65.3438	-65.2812	-65.3125	-64.9062	-65.375
		-0.24	1.74	-62.7812	-52	-48.75	-61.375	-59.3125	-61.8438	-61.3125	-65	-65.0312	-65.6562	-65.5	-65.7812	-64.9688	-65.2812	-65.5312	-65.5	-65.375	-65.5312	-65.5	-65.125	-65.5312
		-0.24	1.76	-62.8125	-54.3438	-51.5938	-62	-60.1875	-62	-61.75	-65.0312	-65.25	-65.8125	-65.5625	-65.6562	-65.0938	-65.3438	-65.6875	-65.5312	-65.375	-65.5625	-65.5625	-65.375	-65.5938
		-0.24	1.78	-62.6562	-56.2812	-54.1562	-62.1875	-60.8438	-62.0938	-62.2812	-65.0938	-65.2188	-65.7812	-65.625	-65.6875	-65.1562	-65.4688	-65.6875	-65.3438	-65.375	-65.5938	-65.5938	-65.6562	-65.625
		-0.24	1.8	-62.625	-57.6875	-56.0938	-62.5	-61.25	-62.25	-62.5938	-65.1562	-65.3125	-65.75	-65.7188	-65.75	-65.2188	-65.3438	-65.7188	-65.4688	-65.4688	-65.625	-65.7188	-65.625	-65.6562
		-0.24	1.82	-62.5312	-59	-57.5625	-62.5625	-61.6875	-62.1562	-62.8125	-65.1875	-65.4062	-65.75	-65.625	-65.75	-65.1875	-65.375	-65.75	-65.4375	-65.4062	-65.6562	-65.7188	-65.6562	-65.625
		-0.24	1.84	-62.4062	-59.875	-58.7812	-62.7188	-61.9375	-62.0312	-62.9688	-65.1562	-65.4062	-65.7188	-65.5938	-65.6562	-65.25	-65.4688	-65.75	-65.375	-65.3438	-65.5938	-65.7188	-65.7812	-65.6562
		-0.24	1.86	-62.4375	-60.6562	-59.7812	-62.625	-62.25	-62.0938	-63.125	-65.2188	-65.3125	-65.7188	-65.5938	-65.5	-65.25	-65.3438	-65.7812	-65.2812	-65.4062	-65.6875	-65.75	-65.7188	-65.6875
		-0.24	1.88	-62.375	-61.1875	-60.5	-62.5938	-62.2188	-62.0625	-63.2188	-65.1562	-65.4688	-65.7188	-65.5938	-65.5	-65.25	-65.2812	-65.8125	-65.2812	-65.375	-65.875	-65.6875	-65.6875	-65.625
		-0.24	1.9	-62.25	-61.6562	-60.9688	-62.6562	-62.3125	-61.9062	-63.1875	-65.125	-65.375	-65.625	-65.5	-65.4688	-65.1562	-65.4062	-65.7188	-65.1562	-65.3438	-65.7188	-65.7188	-65.7812	-65.5312
		-0.24	1.92	-62.1562	-61.875	-61.4062	-62.6875	-62.4062	-61.875	-63.2188	-65.0312	-65.3438	-65.6562	-65.5312	-65.5625	-65.1562	-65.3438	-65.6562	-65.2188	-65.4062	-65.7188	-65.6875	-65.625	-65.4688
		-0.24	1.94	-62.1562	-62.1562	-61.6562	-62.625	-62.3438	-62	-63.3125	-65.0625	-65.4688	-65.75	-65.5	-65.4375	-65.1562	-65.3438	-65.7188	-65.25	-65.3438	-65.75	-65.6562	-65.5625	-65.4062
		-0.24	1.96	-62.0938	-62.2188	-61.9062	-62.5	-62.3125	-61.875	-63.1875	-65	-65.4062	-65.6562	-65.4375	-65.3438	-65.0312	-65.2812	-65.6875	-65.0938	-65.3125	-65.7188	-65.75	-65.5625	-65.3438
		-0.24	1.98	-61.9688	-62.3438	-62.125	-62.5625	-62.2812	-61.75	-63.1562	-65	-65.3438	-65.3438	-65.4062	-65.375	-65.0938	-65.1562	-65.6562	-65.1562	-65.3438	-65.6875	-65.5625	-65.4688	-65.25
		-0.24	2	-61.9688	-62.375	-62.2812	-62.5625	-62.25	-61.75	-63.1875	-65.0312	-65.375	-65.5	-65.4688	-65.3125	-65.0625	-65.2812	-65.6875	-65.1875	-65.2812	-65.6562	-65.625	-65.4062	-65.2812
		-0.24	2.02	-61.7812	-62.4062	-62.3125	-62.4375	-62.2812	-61.625	-63.2188	-65	-65.1875	-65.375	-65.3438	-65.375	-65.0625	-65.1875	-65.6562	-65	-65.3125	-65.6562	-65.5938	-65.4375	-65.2812
		-0.24	2.04	-61.9062	-62.4062	-62.4062	-62.4688	-62.2812	-61.7188	-63.0938	-65	-65.25	-65.4062	-65.3438	-65.3125	-65.0938	-65.125	-65.5938	-65.0625	-65.3438	-65.5312	-65.6562	-65.4688	-65.1875
		-0.24	2.06	-61.8125	-62.5	-62.375	-62.4688	-62.125	-61.6562	-63.0312	-65.0625	-65.1875	-65.5312	-65.4375	-65.4062	-65.0312	-65.1875	-65.6562	-65.1875	-65.3125	-65.5312	-65.5938	-65.3438	-65.1562
		-0.24	2.08	-61.7812	-62.4375	-62.4062	-62.4688	-62.25	-61.7188	-63.125	-65	-65.125	-65.4375	-65.4375	-65.2812	-64.9688	-65.0938	-65.6562	-65.0938	-65.4375	-65.6562	-65.625	-65.4062	-65.3125
		-0.24	2.1	-61.8125	-62.5	-62.3125	-62.4688	-62.0938	-61.625	-63.0625	-65	-65.125	-65.4688	-65.375	-65.2812	-65.0312	-65.0625	-65.5938	-65.0312	-65.4062	-65.625	-65.5312	-65.4688	-65.1562
		-0.24	2.12	-61.8125	-62.3438	-62.2812	-62.375	-62.0938	-61.7188	-63	-65.0312	-65.1875	-65.5	-65.3438	-65.3125	-65	-65.0312	-65.5625	-65.1562	-65.375	-65.5625	-65.5938	-65.4688	-65.1875
		-0.24	2.14	-61.75	-62.3438	-62.2188	-62.3125	-62.1562	-61.7188	-63	-65.0625	-65.0625	-65.4688	-65.4062	-65.25	-65.0312	-64.9375	-65.6562	-65.0938	-65.4062	-65.5938	-65.6562	-65.4688	-65.1875
		-0.24	2.16	-61.8438	-62.375	-62.1562	-62.2812	-62.1562	-61.6875	-63.0312	-64.9375	-65.0938	-65.375	-65.4375	-65.25	-65.0938	-64.9062	-65.7188	-65.0625	-65.4688	-65.625	-65.5	-65.5312	-65.2188
		-0.24	2.18	-61.7812	-62.2812	-62.0625	-62.375	-62.1562	-61.5938	-63	-64.9688	-65.0938	-65.375	-65.4688	-65.1875	-65	-65	-65.6875	-65.1875	-65.375	-65.5938	-65.5312	-65.3438	-65.1875
		-0.24	2.2	-61.75	-62.2188	-61.9688	-62.4688	-62.125	-61.7188	-63.0312	-65.125	-65.0625	-65.4375	-65.5312	-65.2188	-65.0312	-64.9688	-65.6562	-65.25	-65.4375	-65.6875	-65.6562	-65.4062	-65.3125
		-0.24	2.22	-61.875	-62.25	-62.0625	-62.4375	-62.1562	-61.6562	-63.1562	-65	-65.0312	-65.4375	-65.5312	-65.0312	-65	-65	-65.7812	-65.125	-65.4688	-65.7812	-65.625	-65.4375	-65.3125
		-0.24	2.24	-61.8125	-62.2812	-61.9375	-62.5	-62.2188	-61.6875	-63.1562	-64.9375	-65.0625	-65.5	-65.5	-65.0625	-65.0625	-65.0312	-65.75	-65.1562	-65.4688	-65.5938	-65.6562	-65.4375	-65.3125
		-0.24	2.26	-61.8438	-62.2188	-61.9062	-62.5	-62.25	-61.7812	-63.0938	-65.0312	-65.0938	-65.5	-65.5938	-65.1875	-65.1562	-65	-65.6875	-65.25	-65.4375	-65.6562	-65.6875	-65.4062	-65.2812
		-0.24	2.28	-61.9062	-62.1875	-61.875	-62.5312	-62.2188	-61.9375	-63.125	-65.0938	-65.125	-65.4062	-65.625	-65.0938	-65.125	-65	-65.75	-65	-65.5	-65.6875	-65.6562	-65.5	-65.375
		-0.24	2.3	-61.9062	-62.1875	-61.8438	-62.4375	-62.2188	-61.8438	-63.2188	-65.0625	-65.2188	-65.5	-65.5625	-65.0938	-65.1875	-64.9688	-65.8438	-65.0938	-65.4375	-65.625	-65.75	-65.5625	-65.4062
		-0.24	2.32	-62	-62.1875	-61.75	-62.5312	-62.2812	-61.9375	-63.2188	-65.2188	-65.2188	-65.5312	-65.6562	-65.1562	-65.2188	-64.9688	-65.75	-65.375	-65.4688	-65.6875	-65.7188	-65.4688	-65.4062
		-0.24	2.34	-62.0938	-62.1875	-61.7188	-62.5938	-62.3125	-62	-63.2188	-65.2812	-65.1875	-65.5	-65.5625	-65.1875	-65.125	-65.125	-65.75	-65.1875	-65.4688	-65.7188	-65.6875	-65.5938	-65.5
		-0.24	2.36	-62.125	-62.1562	-61.8438	-62.5	-62.4062	-62.0938	-63.3125	-65.25	-65.2812	-65.5625	-65.5938	-65.0625	-65.2188	-65.0625	-65.8125	-65.3125	-65.4688	-65.7188	-65.7188	-65.5625	-65.4375
		-0.24	2.38	-62.1562	-62.25	-61.75	-62.6562	-62.3125	-62.125	-63.25	-65.2812	-65.1875	-65.5938	-65.5625	-65.125	-65.2812	-65.0938	-65.75	-65.4375	-65.5625	-65.8125	-65.75	-65.5	-65.5
		-0.24	2.4	-62.2188	-62.2188	-61.6562	-62.7188	-62.4062	-62.125	-63.2812	-65.375	-65.2812	-65.5625	-65.6562	-65.2188	-65.1562	-65.0625	-65.7812	-65.3125	-65.625	-65.75	-65.625	-65.5938	-65.4688
		-0.24	2.42	-62.2812	-62.25	-61.75	-62.7188	-62.4688	-62.1562	-63.3438	-65.3125	-65.3438	-65.5938	-65.6875	-65.1875	-65.3125	-65.0938	-65.7812	-65.4375	-65.5625	-65.8125	-65.8125	-65.5625	-65.6562
		-0.24	2.44	-62.3125	-62.2812	-61.7188	-62.75	-62.4062	-62.25	-63.3438	-65.375	-65.2188	-65.5938	-65.5938	-65.2812	-65.2812	-65.1875	-65.7812	-65.5	-65.6875	-65.7188	-65.7812	-65.5312	-65.5625
		-0.24	2.46	-62.4062	-62.3125	-61.6875	-62.875	-62.5	-62.2188	-63.4062	-65.3125	-65.25	-65.7188	-65.7188	-65.3438	-65.25	-65.1875	-65.7812	-65.4375	-65.6562	-65.7812	-65.8125	-65.6562	-65.5625
		-0.24	2.48	-62.3125	-62.25	-61.8438	-62.9375	-62.5938	-62.3125	-63.4688	-65.375	-65.3438	-65.6562	-65.7188	-65.25	-65.3438	-65.1562	-65.875	-65.4062	-65.7188	-65.9375	-65.8438	-65.6875	-65.5625
		-0.24	2.5	-62.5	-62.375	-61.7812	-62.875	-62.625	-62.375	-63.5	-65.4375	-65.3438	-65.6875	-65.6562	-65.1875	-65.2812	-65.2812	-65.9375	-65.5625	-65.75	-65.9062	-65.9688	-65.75	-65.625
		-0.24	2.52	-62.5	-62.3438	-61.875	-62.9375	-62.6562	-62.4688	-63.5	-65.4375	-65.3438	-65.75	-65.6875	-65.3125	-65.3438	-65.1875	-65.8438	-65.5938	-65.7812	-65.8438	-65.8438	-65.6562	-65.5625
		-0.24	2.54	-62.5	-62.3125	-61.8438	-63.0938	-62.7188	-62.5	-63.5625	-65.5	-65.3125	-65.8438	-65.8125	-65.2812	-65.4688	-65.3125	-65.875	-65.5312	-65.7812	-65.9062	-65.9062	-65.75	-65.6562
		-0.24	2.56	-62.5938	-62.4688	-61.8438	-63	-62.8438	-62.5312	-63.6875	-65.5	-65.375	-65.8125	-65.7812	-65.2812	-65.4062	-65.2812	-65.8438	-65.625	-65.9062	-65.875	-65.9688	-65.6875	-65.6562
		-0.24	2.58	-62.5625	-62.4688	-62	-63	-62.9062	-62.5625	-63.6875	-65.5938	-65.375	-65.6562	-65.9375	-65.375	-65.4062	-65.2812	-65.875	-65.5625	-65.9375	-65.875	-65.875	-65.6875	-65.6875
		-0.24	2.6	-62.6875	-62.5	-61.9062	-63.125	-62.875	-62.6562	-63.7812	-65.625	-65.4062	-65.8125	-65.9062	-65.3125	-65.5625	-65.3125	-65.9062	-65.625	-65.8438	-66	-65.875	-65.7812	-65.75
		-0.24	2.62	-62.8125	-62.5938	-62	-63.25	-62.9688	-62.7812	-63.75	-65.5625	-65.4375	-65.8125	-65.9375	-65.3125	-65.5312	-65.3438	-66.0312	-65.7188	-65.9062	-65.9688	-65.875	-65.7812	-65.6562
		-0.24	2.64	-62.75	-62.5938	-62.0625	-63.25	-63	-62.75	-63.8125	-65.5938	-65.5	-65.8125	-65.875	-65.3438	-65.5938	-65.3438	-65.9375	-65.7188	-65.9688	-66	-65.9062	-65.75	-65.75
		-0.24	2.66	-62.75	-62.5312	-62.125	-63.25	-63.1875	-62.8438	-63.8438	-65.6562	-65.5312	-65.875	-65.9375	-65.4062	-65.5625	-65.375	-66.0625	-65.6875	-65.9062	-66.0625	-66	-65.9062	-65.6875
		-0.24	2.68	-62.875	-62.6875	-62.125	-63.3438	-63.1562	-62.875	-64.0312	-65.6562	-65.5	-65.8438	-66.0312	-65.375	-65.5625	-65.4062	-66.0312	-65.8438	-66.0312	-66.0312	-66	-65.8438	-65.75
		-0.24	2.7	-63	-62.6562	-62.1875	-63.3438	-63.1562	-62.9688	-64.0312	-65.6562	-65.5	-65.8125	-65.9062	-65.3438	-65.6562	-65.375	-66.0625	-65.8438	-66.0938	-66.0312	-66	-65.9062	-65.8125
		-0.24	2.72	-63.0312	-62.7188	-62.3125	-63.4062	-63.25	-63.0938	-64.0625	-65.7188	-65.5	-65.8125	-66	-65.5	-65.6562	-65.4688	-66.0625	-65.75	-65.9688	-66.0312	-66.0938	-65.875	-65.75
		-0.24	2.74	-63.1875	-62.8125	-62.25	-63.4062	-63.1562	-63.0938	-64.0938	-65.6875	-65.5938	-65.9062	-66.0312	-65.4375	-65.625	-65.4688	-66.0625	-65.75	-66.0625	-66.0938	-66.0312	-65.9688	-65.8438
		-0.24	2.76	-63.0625	-62.8438	-62.3438	-63.5	-63.2812	-63.1562	-64.0312	-65.7188	-65.5	-65.875	-65.9375	-65.4062	-65.6875	-65.4375	-66.0312	-65.8125	-66.0625	-66.0625	-66.0312	-65.9062	-65.9062
		-0.24	2.78	-63.1875	-62.7812	-62.4688	-63.5625	-63.3438	-63.2812	-64.1562	-65.6875	-65.5625	-65.8438	-66	-65.5625	-65.5625	-65.5	-66.0938	-65.75	-66.0938	-66.1875	-66.0312	-65.8438	-65.9062
		-0.24	2.8	-63.2188	-62.8438	-62.5	-63.5625	-63.375	-63.2188	-64.1875	-65.7188	-65.6875	-65.9062	-66.0625	-65.5938	-65.5625	-65.5	-66.0938	-65.7812	-66.0625	-66.25	-66.0625	-66	-65.9062
		-0.24	2.82	-63.2812	-62.9062	-62.5312	-63.5625	-63.5312	-63.3125	-64.1875	-65.7812	-65.5938	-65.9062	-66.0625	-65.5	-65.6875	-65.4375	-66.1562	-65.8438	-66.0938	-66.25	-66.0312	-65.9062	-65.9062
		-0.24	2.84	-63.4062	-62.9062	-62.5938	-63.5938	-63.6875	-63.3125	-64.2188	-65.7812	-65.5938	-65.875	-66.0312	-65.5938	-65.6562	-65.5	-66.1562	-65.8438	-65.9688	-66.1875	-66.0625	-65.9688	-65.9688
		-0.24	2.86	-63.4062	-63	-62.6562	-63.7188	-63.5938	-63.375	-64.375	-65.7812	-65.625	-65.9688	-66.1562	-65.6562	-65.6562	-65.4688	-66.1875	-65.875	-66.0625	-66.2188	-66.0938	-65.9688	-66
		-0.24	2.88	-63.4688	-63.0938	-62.6562	-63.75	-63.625	-63.5	-64.3125	-65.75	-65.5938	-65.9688	-66.1562	-65.625	-65.7812	-65.4688	-66.125	-65.9688	-66.125	-66.2812	-66.0312	-65.9375	-65.9062
		-0.24	2.9	-63.5	-63.0625	-62.6562	-63.9062	-63.7188	-63.5	-64.4062	-65.8438	-65.625	-65.9062	-66.0625	-65.625	-65.75	-65.5625	-66.0625	-65.9062	-66.1875	-66.1875	-66.0312	-65.9375	-66.0312
		-0.24	2.92	-63.5	-63.1875	-62.7188	-63.875	-63.6875	-63.5625	-64.4375	-65.875	-65.7812	-66	-66.1875	-65.5625	-65.6875	-65.5	-66.1875	-65.9062	-66.0938	-66.1562	-66.125	-66.0312	-66.0312
		-0.24	2.94	-63.5312	-63.1562	-62.8125	-63.9375	-63.875	-63.625	-64.5	-65.7812	-65.6875	-65.8438	-66.25	-65.5938	-65.75	-65.5312	-66.1875	-66.0625	-66.1875	-66.1875	-66.1562	-66.0625	-65.9688
		-0.24	2.96	-63.5625	-63.1562	-62.8438	-64.0312	-63.8438	-63.7188	-64.5938	-65.8125	-65.6875	-65.8438	-66.1875	-65.5	-65.7188	-65.5625	-66.1875	-65.9688	-66.1562	-66.1875	-66.1562	-66.0625	-65.9688
		-0.24	2.98	-63.625	-63.25	-62.9062	-64.0938	-63.8438	-63.6875	-64.6562	-65.875	-65.7812	-65.875	-66.1562	-65.7188	-65.8125	-65.4688	-66.25	-66	-66.1562	-66.0938	-66.0312	-66.0938	-66.0312
		-0.24	3	-63.8125	-63.2188	-62.9688	-64.0625	-64.0312	-63.8438	-64.7188	-65.875	-65.7188	-65.9688	-66.1875	-65.5938	-65.7812	-65.5	-66.25	-66.0312	-66.25	-66.2188	-66.0938	-66.125	-66.0312
		-0.24	3.02	-63.7812	-63.3125	-63	-64.0938	-64.0312	-63.7812	-64.7812	-65.875	-65.7812	-65.8438	-66.125	-65.5938	-65.75	-65.5312	-66.2188	-66.0625	-66.1875	-66.1875	-66.125	-66.0312	-66.0625
		-0.24	3.04	-63.7188	-63.4062	-63.0625	-64.1562	-64.0312	-63.875	-64.8438	-65.875	-65.9062	-65.9688	-66.0938	-65.5938	-65.8438	-65.5	-66.1875	-65.9688	-66.2812	-66.125	-66.0625	-66.0312	-66.0312
		-0.24	3.06	-63.8125	-63.3438	-63.1875	-64.0938	-64.0625	-63.875	-64.8125	-65.9062	-65.8438	-65.9375	-66.1562	-65.6875	-65.7812	-65.5938	-66.2812	-66.0312	-66.2188	-66.2188	-66.0938	-66.0938	-66.0938
		-0.24	3.08	-63.8125	-63.5	-63.125	-64.1562	-64.125	-63.9062	-64.875	-65.8438	-65.9062	-66	-66.1875	-65.75	-65.8438	-65.5625	-66.1875	-66.0938	-66.2188	-66.2188	-66.125	-66.0625	-66.0625
		-0.24	3.1	-63.9375	-63.5	-63.1875	-64.2188	-64.2188	-64.0312	-65	-65.9062	-65.8125	-66.0312	-66.1562	-65.6875	-65.9062	-65.5312	-66.125	-66.125	-66.2812	-66.2188	-65.9375	-66.0938	-66.0625
		-0.24	3.12	-64.0312	-63.5312	-63.3125	-64.3125	-64.2188	-64.0625	-65.0312	-65.9688	-65.9375	-66.0625	-66.2188	-65.6875	-65.8438	-65.5	-66.2188	-66.1875	-66.1562	-66.2188	-65.9688	-66.0625	-66.0625
		-0.24	3.14	-64.0312	-63.625	-63.3438	-64.3125	-64.2812	-64.0938	-65.0312	-65.875	-65.875	-65.9688	-66.25	-65.6875	-65.875	-65.4375	-66.2812	-66.1562	-66.375	-66.2812	-66.0938	-66.0312	-66.0625
		-0.24	3.16	-64.0312	-63.7188	-63.3125	-64.25	-64.1875	-64.1875	-65.125	-65.9062	-65.7812	-65.875	-66.1875	-65.6562	-65.9062	-65.4688	-66.0938	-66.0312	-66.3438	-66.1562	-66.0625	-65.9688	-66.0312
		-0.24	3.18	-64.0312	-63.6875	-63.4375	-64.3125	-64.3125	-64.2812	-65.1562	-66.0625	-65.8438	-66	-66.1562	-65.6562	-65.875	-65.5938	-66.125	-66.0938	-66.2812	-66.1562	-66.0312	-66.0312	-66.0938
		-0.24	3.2	-64.0938	-63.7812	-63.4375	-64.375	-64.3438	-64.3125	-65.2188	-65.9688	-65.9062	-65.9062	-66.3438	-65.6562	-65.9375	-65.6562	-66.2188	-66.125	-66.2188	-66.0938	-66.0938	-66.0312	-66.0938
		-0.24	3.22	-64.1562	-63.875	-63.3438	-64.375	-64.4062	-64.375	-65.1875	-66.0312	-65.8438	-65.9375	-66.2812	-65.6562	-65.9062	-65.5	-66.2812	-66.1562	-66.0625	-66.1875	-66.0312	-66	-66.0312
		-0.24	3.24	-64.25	-63.9062	-63.5312	-64.5	-64.5	-64.3125	-65.3438	-66.0312	-65.875	-66.0312	-66.25	-65.7188	-65.8125	-65.5625	-66.1562	-66.125	-66.25	-66.1875	-66.0625	-65.9688	-66.1562
		-0.24	3.26	-64.25	-63.9375	-63.5312	-64.5	-64.5312	-64.3438	-65.2812	-65.9375	-65.875	-65.9375	-66.4062	-65.7812	-65.9375	-65.6562	-66.1562	-66.2188	-66.2188	-66.1562	-66.0625	-66.0625	-66.1562
		-0.24	3.28	-64.4062	-64.0312	-63.5312	-64.5312	-64.5312	-64.375	-65.2812	-66.0938	-65.8125	-65.9062	-66.375	-65.6875	-65.9688	-65.375	-66.2812	-66.1562	-66.1875	-66.25	-66	-66.0312	-66.0938
		-0.24	3.3	-64.3125	-63.9375	-63.7188	-64.5938	-64.5938	-64.4375	-65.4688	-66	-65.875	-65.9375	-66.3438	-65.75	-65.9375	-65.4688	-66.125	-66.2188	-66.2188	-66.0938	-66.0312	-66.0312	-66.0312
		-0.24	3.32	-64.4062	-64.0312	-63.75	-64.6875	-64.6875	-64.5625	-65.4375	-66.0938	-65.9062	-66.0312	-66.3438	-65.7812	-66.0312	-65.5	-66.125	-66.1562	-66.1562	-66.1875	-66.0625	-66.125	-66.125
		-0.24	3.34	-64.4688	-64.0625	-63.75	-64.5938	-64.6875	-64.5625	-65.5	-66.0625	-65.9062	-65.9688	-66.3438	-65.75	-65.9688	-65.5625	-66.1875	-66.2188	-66.2188	-66.3125	-66.0312	-65.9375	-66.0625
		-0.24	3.36	-64.4375	-64.0312	-63.8438	-64.7188	-64.7812	-64.6562	-65.4688	-66	-65.9688	-66	-66.2188	-65.6875	-65.7812	-65.5938	-66.1562	-66.1875	-66.3125	-66.2188	-66.0312	-66.0625	-66.0625
		-0.24	3.38	-64.4062	-64.1562	-63.9062	-64.75	-64.8125	-64.625	-65.5	-66.0312	-65.9688	-66.0312	-66.1875	-65.75	-65.8438	-65.5312	-66.0938	-66.125	-66.2188	-66.1562	-66.0312	-65.9688	-66.0312
		-0.24	3.4	-64.5625	-64.125	-63.9062	-64.7812	-64.8125	-64.6875	-65.5625	-66.0938	-65.9375	-65.9688	-66.2188	-65.8125	-65.875	-65.5312	-66.125	-66.2812	-66.2812	-66.2188	-65.9688	-66	-66.0938
		-0.24	3.42	-64.5	-64.1562	-64.0312	-64.9062	-64.9062	-64.7812	-65.5	-66	-65.9688	-65.9688	-66.2812	-65.7188	-65.9375	-65.5938	-66.0938	-66.1875	-66.2812	-66.25	-65.9062	-65.9062	-66.0312
		-0.24	3.44	-64.5625	-64.3125	-64.0312	-64.9688	-64.9688	-64.8125	-65.625	-66.0312	-65.9062	-66.0625	-66.25	-65.7812	-65.9062	-65.5	-66	-66.1875	-66.25	-66.1875	-66.0312	-65.9688	-66.0312
		-0.24	3.46	-64.6562	-64.375	-64.0312	-64.9062	-64.9062	-64.8438	-65.6875	-66.0625	-65.9062	-65.9062	-66.1875	-65.7812	-65.8438	-65.5938	-66.0312	-66.3125	-66.2188	-66.0625	-65.9375	-65.875	-66.0625
		-0.24	3.48	-64.625	-64.2812	-64.0312	-64.875	-64.9688	-64.875	-65.6875	-66	-66.0312	-65.9375	-66.3125	-65.7188	-65.9062	-65.5312	-66.0938	-66.1562	-66.3438	-66.25	-65.9375	-65.875	-66.0625
		-0.24	3.5	-64.6562	-64.3438	-64.0312	-65	-65	-64.7812	-65.75	-66.0312	-65.8438	-66	-66.2812	-65.6562	-65.9688	-65.5	-66.0938	-66.125	-66.1875	-66.1562	-66.0312	-65.9688	-66.0625
		-0.24	3.52	-64.7188	-64.5	-64.0938	-65	-65	-65	-65.8438	-66.0625	-65.9062	-65.9375	-66.2812	-65.75	-65.7812	-65.5625	-65.9688	-66.0938	-66.1875	-66.1562	-65.9062	-65.9375	-66.0938
		-0.24	3.54	-64.7812	-64.5	-64.0938	-65	-65.0625	-65	-65.8125	-66.0312	-65.9062	-65.9062	-66.2812	-65.75	-65.875	-65.5	-66.0625	-66.125	-66.2188	-66.1875	-65.9375	-65.9375	-66.0312
		-0.24	3.56	-64.7812	-64.4062	-64.0938	-65.0625	-65.1562	-64.9688	-65.7812	-66.0312	-65.8438	-65.9375	-66.375	-65.6875	-66	-65.5312	-66.125	-66.1562	-66.2188	-66.1562	-66.0312	-65.875	-66.0625
		-0.24	3.58	-64.7812	-64.5625	-64.125	-65.0625	-65.0938	-65.0938	-65.8438	-66.0312	-65.9375	-65.9062	-66.2812	-65.6875	-65.8125	-65.5	-66.0312	-66.1875	-66.2188	-66.1562	-66.0312	-65.875	-66.1562
		-0.24	3.6	-64.7812	-64.5312	-64.3125	-65.0625	-65.1562	-65.0625	-65.9062	-66.0938	-65.9375	-65.9375	-66.2188	-65.6562	-65.9062	-65.5312	-65.9688	-66.25	-66.2812	-66.0625	-66	-65.8438	-65.9688
		-0.24	3.62	-64.875	-64.5938	-64.3438	-65.2188	-65.2188	-65.0312	-65.9688	-66.0625	-65.8125	-65.9062	-66.2188	-65.7812	-65.9688	-65.4062	-66.0625	-66.1562	-66.1562	-66.1875	-66.0625	-65.9062	-65.9688
		-0.24	3.64	-64.8438	-64.5938	-64.25	-65.125	-65.2812	-65.1562	-65.9688	-66.125	-65.8438	-65.9062	-66.1875	-65.6562	-65.875	-65.5312	-66.0312	-66.1562	-66.0625	-66.125	-66.0625	-65.9688	-66.0625
		-0.24	3.66	-64.9062	-64.5312	-64.4375	-65.1875	-65.1875	-65.25	-66.0312	-66.1562	-65.9688	-65.9062	-66.2188	-65.75	-65.9062	-65.5	-65.9688	-66.1875	-66.1562	-66.0625	-66	-65.9375	-66
		-0.24	3.68	-64.9062	-64.625	-64.5	-65.1875	-65.4062	-65.2812	-66.0625	-66.0625	-65.875	-65.875	-66.1562	-65.7188	-65.875	-65.4688	-66.0312	-66.2812	-66.2812	-66.2188	-65.875	-65.9062	-65.9688
		-0.24	3.7	-64.9375	-64.75	-64.5	-65.2812	-65.3125	-65.2812	-66.0625	-66.0312	-65.9375	-65.875	-66.1562	-65.625	-65.7812	-65.5312	-66.0312	-66.125	-66.125	-66.1875	-66.1562	-65.9062	-65.9688
		-0.24	3.72	-65.0312	-64.625	-64.6562	-65.2812	-65.3438	-65.2188	-66.125	-66.125	-65.8438	-65.8438	-66.1562	-65.6562	-65.9688	-65.4688	-65.9375	-66.25	-66.1562	-66.125	-66.0312	-65.9062	-65.875
		-0.24	3.74	-65.0625	-64.75	-64.5312	-65.3125	-65.5312	-65.2812	-66.125	-66.1562	-65.7812	-65.875	-66.1562	-65.6875	-65.9375	-65.4688	-65.9688	-66.1562	-66.0938	-66.1875	-65.9375	-65.8125	-65.9062
		-0.24	3.76	-65.0312	-64.75	-64.5938	-65.3125	-65.4062	-65.3438	-66.1562	-66.0312	-65.875	-65.875	-66.1875	-65.6562	-65.8438	-65.4688	-66.0938	-66.0938	-66.0312	-66.1875	-66	-65.9062	-66.0312
		-0.24	3.78	-65.0938	-64.6562	-64.8125	-65.3438	-65.5	-65.3125	-66.1875	-66.0312	-65.8125	-65.6875	-66.1562	-65.5625	-65.9688	-65.4688	-66.0938	-66.1562	-66.1562	-66.125	-65.9062	-65.9062	-65.9375
		-0.24	3.8	-65.0938	-64.8125	-64.625	-65.4688	-65.5312	-65.3125	-66.1875	-66.0312	-65.8125	-65.7188	-66.0938	-65.6875	-65.9375	-65.4062	-66	-66.1875	-66.0938	-66.1562	-66	-65.7812	-65.9688
		-0.24	3.82	-65.1875	-64.9062	-64.6875	-65.4375	-65.4688	-65.4688	-66.3438	-66.0312	-65.875	-65.8125	-66.1562	-65.625	-65.8438	-65.4688	-65.9375	-66.1562	-66.0312	-66.1562	-65.9688	-65.75	-65.9375
		-0.24	3.84	-65.1562	-64.9062	-64.6875	-65.4062	-65.5625	-65.4375	-66.25	-66.0312	-65.9062	-65.7188	-66.25	-65.5	-65.9062	-65.4062	-66.0312	-66.0938	-66.0938	-66.0938	-65.9062	-65.8438	-65.75
		-0.24	3.86	-65.1875	-64.9688	-64.7812	-65.5312	-65.5938	-65.5312	-66.2812	-66.0312	-65.8125	-65.7188	-66.125	-65.5625	-65.875	-65.4062	-65.9062	-66.125	-66.0625	-65.9688	-65.9688	-65.8125	-65.8438
		-0.24	3.88	-65.2188	-64.9688	-64.875	-65.4688	-65.5938	-65.5312	-66.25	-65.9688	-65.9375	-65.6875	-66.1562	-65.5625	-65.8125	-65.4688	-65.9688	-66	-66.0625	-66.0312	-65.8125	-65.75	-65.9062
		-0.24	3.9	-65.3125	-65.0312	-64.8438	-65.5	-65.6562	-65.5312	-66.375	-65.875	-65.8125	-65.6875	-66.1562	-65.4375	-65.9062	-65.375	-65.875	-66	-65.875	-66.0625	-65.875	-65.8438	-65.8438
		-0.24	3.92	-65.3438	-65.0312	-64.8438	-65.5625	-65.6562	-65.5625	-66.375	-66.0312	-65.9062	-65.6875	-66.1875	-65.5625	-65.8438	-65.4375	-65.9062	-66.0938	-66.0312	-66.0625	-65.875	-65.7812	-65.875
		-0.24	3.94	-65.3125	-65.0312	-64.9062	-65.5625	-65.6562	-65.625	-66.4375	-66.0312	-65.7812	-65.7188	-66.1562	-65.5625	-65.8125	-65.4688	-65.8438	-66.0312	-65.9375	-66.0312	-65.8438	-65.7812	-65.875
		-0.24	3.96	-65.2812	-65.0625	-64.875	-65.5625	-65.625	-65.6875	-66.4062	-65.9375	-65.6875	-65.75	-66.0938	-65.5	-65.8125	-65.4062	-65.9375	-66.0625	-66	-66.0625	-65.8438	-65.8125	-65.8438
		-0.24	3.98	-65.4062	-65.1562	-64.9375	-65.6562	-65.7812	-65.7188	-66.4375	-65.9062	-65.7812	-65.625	-66.125	-65.5312	-65.7188	-65.4375	-65.9375	-66.0938	-66.0625	-66.0312	-65.875	-65.7812	-65.9375
		-0.24	4	-65.375	-65.125	-65.0312	-65.625	-65.8125	-65.5625	-66.5	-65.9375	-65.7812	-65.5625	-66.125	-65.5312	-65.7188	-65.4375	-65.75	-66.1562	-65.9375	-66.0625	-65.875	-65.75	-65.8438
		-0.24	4.02	-65.4062	-65.2188	-65.0312	-65.625	-65.7812	-65.75	-66.5	-65.9688	-65.6875	-65.75	-66.0312	-65.5625	-65.6875	-65.3125	-65.875	-66.0625	-65.875	-65.9375	-65.6875	-65.7188	-65.8438
		-0.24	4.04	-65.375	-65.2188	-65.0938	-65.6562	-65.8438	-65.75	-66.5938	-65.8438	-65.75	-65.5938	-66.0625	-65.4688	-65.7188	-65.3438	-65.8438	-66.0312	-65.9375	-66.0625	-65.7812	-65.7812	-65.9062
		-0.24	4.06	-65.4062	-65.0938	-65.1562	-65.6875	-65.9688	-65.8125	-66.5625	-65.8438	-65.75	-65.625	-66	-65.5	-65.7188	-65.4062	-65.8438	-66.125	-65.875	-66.0625	-65.8438	-65.6875	-65.8125
		-0.24	4.08	-65.4688	-65.3125	-65.125	-65.75	-65.9375	-65.8125	-66.5312	-65.8438	-65.5938	-65.625	-66.0312	-65.4688	-65.7812	-65.25	-65.75	-66.0625	-65.8438	-66.0312	-65.8438	-65.6562	-65.7188
		-0.24	4.1	-65.4375	-65.25	-65.2812	-65.7188	-65.9062	-65.7812	-66.6562	-65.875	-65.6875	-65.5312	-65.9062	-65.5625	-65.75	-65.375	-65.8438	-66.0938	-65.875	-66.0312	-65.75	-65.6875	-65.8125
		-0.24	4.12	-65.4688	-65.2812	-65.125	-65.6875	-66	-65.875	-66.5938	-65.8125	-65.7188	-65.5	-66.0312	-65.5	-65.6562	-65.3125	-65.75	-66.0625	-65.8125	-66.0312	-65.8438	-65.7812	-65.7188
		-0.24	4.14	-65.5625	-65.2812	-65.2188	-65.8125	-65.9688	-65.9062	-66.5938	-65.8125	-65.6562	-65.5938	-65.9375	-65.5	-65.6562	-65.2812	-65.8438	-66	-65.8125	-66	-65.7188	-65.7812	-65.7812
		-0.24	4.16	-65.5	-65.2812	-65.2812	-65.7188	-66.0625	-65.9062	-66.6875	-65.8125	-65.75	-65.5938	-65.8438	-65.5	-65.5938	-65.375	-65.7812	-66.0312	-65.9062	-65.9688	-65.7188	-65.75	-65.7812
		-0.24	4.18	-65.5312	-65.4375	-65.1562	-65.75	-66.0312	-65.9062	-66.6875	-65.6875	-65.75	-65.5625	-65.8438	-65.5312	-65.5312	-65.25	-65.6875	-66.0312	-65.875	-66	-65.7812	-65.7188	-65.7188
		-0.24	4.2	-65.5625	-65.3438	-65.25	-65.8125	-65.9375	-66.0312	-66.625	-65.75	-65.6875	-65.5625	-65.9375	-65.5	-65.7188	-65.1875	-65.7812	-66.0312	-65.9062	-65.9688	-65.7812	-65.8125	-65.6875
		-0.24	4.22	-65.5	-65.4688	-65.3125	-65.8438	-66.0625	-66.0312	-66.6562	-65.75	-65.7812	-65.5938	-65.9062	-65.5625	-65.5312	-65.2812	-65.6875	-66.0312	-65.875	-65.9062	-65.75	-65.75	-65.8125
		-0.24	4.24	-65.5938	-65.4688	-65.25	-65.8438	-66.1562	-65.9688	-66.6562	-65.75	-65.8125	-65.4688	-65.9375	-65.4375	-65.5938	-65.2188	-65.6562	-66.0312	-65.875	-66.0312	-65.8125	-65.75	-65.7188
		-0.24	4.26	-65.6875	-65.4062	-65.3125	-66	-66.0938	-66.0312	-66.7188	-65.8125	-65.7812	-65.5625	-65.9062	-65.4375	-65.6875	-65.1875	-65.7812	-66.0312	-65.7812	-66.0312	-65.7188	-65.7188	-65.6875
		-0.24	4.28	-65.6562	-65.4688	-65.2812	-65.875	-66.1562	-66.0938	-66.8438	-65.7188	-65.7188	-65.5312	-65.9062	-65.4688	-65.5625	-65.1562	-65.7188	-66.0312	-65.8125	-66.0625	-65.6875	-65.7812	-65.7188
		-0.24	4.3	-65.6875	-65.4688	-65.3125	-65.875	-66.25	-66.0938	-66.8438	-65.7188	-65.6562	-65.4688	-65.9062	-65.4375	-65.5312	-65.25	-65.7188	-66.1562	-65.7812	-65.9375	-65.7812	-65.6875	-65.625
		-0.24	4.32	-65.75	-65.4062	-65.375	-65.9062	-66.1875	-66.125	-66.8438	-65.625	-65.625	-65.4688	-65.875	-65.375	-65.5625	-65.1875	-65.75	-66.0938	-65.6562	-65.875	-65.7188	-65.6562	-65.6562
		-0.24	4.34	-65.75	-65.4688	-65.3438	-65.875	-66.1875	-66.1562	-66.9062	-65.6875	-65.6875	-65.5938	-65.9062	-65.4375	-65.5625	-65.3125	-65.7188	-66.0625	-65.75	-65.875	-65.7188	-65.7188	-65.6875
		-0.24	4.36	-65.7188	-65.625	-65.4062	-65.9375	-66.2812	-66.2188	-66.875	-65.6562	-65.5625	-65.4375	-65.9375	-65.5	-65.625	-65.4375	-65.625	-65.9688	-65.7812	-65.8125	-65.7812	-65.5938	-65.6562
		-0.24	4.38	-65.75	-65.5938	-65.5	-65.9375	-66.3438	-66.1562	-66.9375	-65.6562	-65.6562	-65.4062	-65.875	-65.4688	-65.5938	-65.0625	-65.5938	-66.0625	-65.75	-65.9062	-65.75	-65.6875	-65.625
		-0.24	4.4	-65.7812	-65.5938	-65.4375	-65.9375	-66.2188	-66.125	-66.9375	-65.5625	-65.7188	-65.4688	-65.9062	-65.375	-65.5312	-65.1562	-65.5625	-66.0312	-65.7188	-65.9688	-65.6875	-65.7188	-65.5625
		-0.24	4.42	-65.8438	-65.5938	-65.5625	-66.0312	-66.4062	-66.2812	-66.9375	-65.5938	-65.5938	-65.3438	-65.7188	-65.4688	-65.5312	-65.25	-65.5938	-66.0312	-65.7812	-65.875	-65.625	-65.6875	-65.5625
		-0.24	4.44	-65.875	-65.625	-65.5312	-66.0312	-66.3438	-66.3125	-66.9688	-65.6562	-65.5625	-65.3438	-65.75	-65.4375	-65.5312	-65.0312	-65.6562	-65.9375	-65.6562	-65.8125	-65.5938	-65.6562	-65.625
		-0.24	4.46	-65.7812	-65.6875	-65.5	-66.0312	-66.375	-66.25	-67	-65.6875	-65.625	-65.3125	-65.875	-65.375	-65.5312	-65.0938	-65.5625	-65.9375	-65.5312	-65.8438	-65.5	-65.625	-65.5938
		-0.24	4.48	-65.8438	-65.6875	-65.5938	-66.0625	-66.3438	-66.2812	-66.9375	-65.5312	-65.5625	-65.3125	-65.875	-65.5	-65.5625	-65.1875	-65.6562	-65.9062	-65.7188	-65.875	-65.5938	-65.5938	-65.6562
		-0.24	4.5	-65.9375	-65.7188	-65.625	-66.0312	-66.4062	-66.3125	-66.9375	-65.5312	-65.5312	-65.3125	-65.6875	-65.4375	-65.5625	-65.0312	-65.7188	-66.0312	-65.6562	-65.8125	-65.6875	-65.5625	-65.5
		-0.24	4.52	-65.875	-65.6875	-65.5938	-66.1562	-66.4062	-66.375	-67.0312	-65.6562	-65.5	-65.3438	-65.7812	-65.375	-65.5	-65.125	-65.5938	-66.0312	-65.5938	-65.9062	-65.5938	-65.5625	-65.5
		-0.24	4.54	-65.875	-65.8438	-65.6562	-66.0625	-66.4062	-66.4062	-67.0312	-65.6562	-65.5312	-65.2812	-65.8125	-65.2812	-65.5938	-65.1562	-65.6562	-65.9688	-65.625	-65.875	-65.5	-65.5938	-65.5938
		-0.24	4.56	-65.8438	-65.8438	-65.5938	-66.125	-66.5312	-66.4375	-67.125	-65.5312	-65.625	-65.25	-65.6562	-65.2812	-65.5625	-64.9375	-65.6562	-65.8438	-65.7188	-65.7812	-65.5625	-65.5938	-65.5312
		-0.24	4.58	-66.0312	-65.7812	-65.75	-66.2188	-66.4688	-66.3438	-67.0625	-65.5312	-65.5625	-65.2188	-65.6875	-65.2812	-65.5625	-64.9688	-65.5938	-65.9062	-65.6562	-65.75	-65.5	-65.5625	-65.4688
		-0.24	4.6	-65.9688	-65.875	-65.7188	-66.1562	-66.5312	-66.4062	-67	-65.625	-65.4688	-65.3125	-65.6875	-65.3125	-65.5	-65.0312	-65.6562	-65.9688	-65.5938	-65.75	-65.4375	-65.5938	-65.5
		-0.24	4.62	-65.9375	-65.8438	-65.7188	-66.1562	-66.5	-66.375	-67.1562	-65.5938	-65.5312	-65.1875	-65.6875	-65.2812	-65.4375	-64.9062	-65.5	-65.875	-65.625	-65.8125	-65.5312	-65.5938	-65.4375
		-0.24	4.64	-65.9688	-65.8438	-65.7812	-66.2812	-66.5312	-66.3438	-67.125	-65.5938	-65.4375	-65.2188	-65.625	-65.3125	-65.4375	-65	-65.4688	-65.8438	-65.5938	-65.7812	-65.5312	-65.5625	-65.4062
		-0.24	4.66	-66.0312	-65.9062	-65.7812	-66.25	-66.625	-66.5	-67.125	-65.5625	-65.4062	-65.2188	-65.5938	-65.2188	-65.4375	-65.0938	-65.5625	-65.9375	-65.5938	-65.75	-65.4688	-65.5625	-65.4375
		-0.24	4.68	-66	-65.875	-65.8438	-66.2812	-66.625	-66.4688	-67.1875	-65.5	-65.5	-65.25	-65.6875	-65.1875	-65.4688	-64.875	-65.5938	-65.8125	-65.625	-65.8438	-65.5312	-65.5312	-65.3125
		-0.24	4.7	-66.0312	-65.9062	-65.8125	-66.2188	-66.6562	-66.4375	-67.125	-65.4688	-65.4688	-65.25	-65.6562	-65.2188	-65.4688	-64.9688	-65.4062	-65.8125	-65.5312	-65.7188	-65.5	-65.5312	-65.4062
		-0.24	4.72	-66.0938	-65.9375	-65.8438	-66.2188	-66.6875	-66.5	-67.1562	-65.5312	-65.5	-65.2812	-65.5938	-65.2812	-65.4688	-65.0312	-65.5938	-65.9062	-65.5312	-65.7188	-65.4375	-65.5938	-65.4062
		-0.24	4.74	-66.0625	-65.9688	-65.8438	-66.2812	-66.6875	-66.5	-67.25	-65.5312	-65.4375	-65.2188	-65.6562	-65.1875	-65.5	-64.9688	-65.5938	-65.875	-65.5938	-65.7812	-65.4688	-65.5312	-65.3438
		-0.24	4.76	-66.0312	-65.9375	-65.9062	-66.2812	-66.6562	-66.4375	-67.1562	-65.5625	-65.5	-65.1562	-65.6875	-65.1562	-65.375	-64.9375	-65.4688	-65.7812	-65.5312	-65.7812	-65.4688	-65.5938	-65.3125
		-0.24	4.78	-66.1562	-65.9688	-65.8438	-66.2188	-66.6875	-66.5938	-67.1562	-65.4688	-65.375	-65.0938	-65.5938	-65.25	-65.4688	-65	-65.5312	-65.8438	-65.5	-65.5938	-65.375	-65.5625	-65.3438
		-0.24	4.8	-66.0938	-66	-65.9062	-66.2812	-66.8125	-66.5	-67.1875	-65.5	-65.4375	-65.125	-65.625	-65.1562	-65.4688	-64.9688	-65.4688	-65.8438	-65.5	-65.5938	-65.5	-65.5625	-65.3125
		-0.24	4.82	-66.125	-65.9062	-66.0312	-66.1875	-66.7188	-66.5312	-67.1875	-65.5625	-65.4688	-65.0938	-65.6562	-65.1875	-65.4375	-64.875	-65.5312	-65.8125	-65.4062	-65.625	-65.4688	-65.5	-65.4062
		-0.24	4.84	-66.2188	-66.0312	-66	-66.1875	-66.7812	-66.6562	-67.1875	-65.375	-65.3438	-65	-65.5938	-65.1562	-65.375	-64.9375	-65.5	-65.7188	-65.375	-65.5625	-65.4688	-65.5312	-65.3438
		-0.24	4.86	-66.125	-66.0625	-66	-66.25	-66.8438	-66.5625	-67.3125	-65.4375	-65.375	-65.0938	-65.5625	-65.1875	-65.5	-64.9688	-65.4688	-65.7812	-65.4375	-65.625	-65.4375	-65.4375	-65.2812
		-0.24	4.88	-66.0625	-66.0312	-66.0312	-66.2812	-66.8125	-66.5625	-67.2812	-65.5	-65.375	-65.1562	-65.5625	-65.1875	-65.3438	-64.8438	-65.4688	-65.7188	-65.5312	-65.5938	-65.3125	-65.5	-65.3125
		-0.24	4.9	-66.25	-66.0312	-66.0312	-66.2812	-66.8125	-66.5625	-67.2812	-65.375	-65.3438	-65.1562	-65.5312	-65.1562	-65.4062	-64.9062	-65.4375	-65.75	-65.4375	-65.5	-65.4062	-65.5	-65.25
		-0.24	4.92	-66.1562	-66.125	-65.9688	-66.3438	-66.9375	-66.5312	-67.4062	-65.375	-65.4062	-65.0625	-65.5	-65.125	-65.3438	-64.8438	-65.4688	-65.7812	-65.375	-65.5	-65.2812	-65.5	-65.3438
		-0.24	4.94	-66.1875	-66.0625	-66.0312	-66.25	-66.8125	-66.5625	-67.375	-65.4062	-65.3438	-65.125	-65.5938	-65.1562	-65.25	-64.9062	-65.4688	-65.7812	-65.4688	-65.5938	-65.3438	-65.5	-65.2812
		-0.24	4.96	-66.2188	-66.0938	-65.9688	-66.2812	-66.7188	-66.6562	-67.3125	-65.4062	-65.3438	-65.0938	-65.5938	-64.9688	-65.3438	-64.8438	-65.4688	-65.7188	-65.4062	-65.4688	-65.3438	-65.5312	-65.2812
		-0.24	4.98	-66.3125	-66.1562	-66.0312	-66.3125	-66.8438	-66.5938	-67.4688	-65.25	-65.4375	-65.0312	-65.5	-65.0312	-65.1562	-64.8125	-65.5	-65.7188	-65.4062	-65.5	-65.25	-65.5	-65.1875
		-0.14	0	-67.5625	-67.125	-67.0938	-67.4062	-67.5625	-67.4688	-68.0312	-67.375	-67.2188	-67.4375	-67.5	-67.1562	-67.6875
		-0.14	0.02	-66.0938	-65.75	-65.625	-66.0312	-66.125	-66.0312	-66.6875	-66.0312	-65.8438	-65.9062	-66.125	-65.75	-66.1562
		-0.14	0.04	-65	-64.6562	-64.625	-64.9688	-65.0938	-64.9375	-65.625	-64.9375	-64.7812	-64.9062	-65.0312	-64.7188	-65.0625
		-0.14	0.06	-64.25	-63.8438	-63.8438	-64.2812	-64.375	-64.2812	-64.7812	-64.1562	-64.0312	-64.1562	-64.25	-64.0312	-64.3438
		-0.14	0.08	-63.7812	-63.3438	-63.3125	-63.6875	-63.8438	-63.6875	-64.25	-63.5625	-63.4688	-63.5625	-63.8125	-63.4062	-63.7188
		-0.14	0.1	-63.375	-63.0312	-63	-63.4062	-63.4062	-63.2812	-64.0312	-63.25	-63.0625	-63.3438	-63.3438	-63.0625	-63.4062
		-0.14	0.12	-63.0312	-62.8125	-62.7188	-63.1562	-63.1875	-63.0938	-63.7188	-63	-62.8438	-62.9688	-63.125	-62.75	-63.25
		-0.14	0.14	-62.8438	-62.5625	-62.4375	-62.9688	-62.9688	-62.9062	-63.5625	-62.8438	-62.625	-62.8125	-63	-62.5	-63.0938
		-0.14	0.16	-62.7188	-62.5	-62.4062	-62.8438	-62.9062	-62.6875	-63.4062	-62.7188	-62.5312	-62.5938	-62.875	-62.4375	-62.875
		-0.14	0.18	-62.625	-62.3438	-62.375	-62.7812	-62.8438	-62.6562	-63.375	-62.5938	-62.4375	-62.5	-62.7812	-62.3438	-62.7812
		-0.14	0.2	-62.5938	-62.1875	-62.25	-62.6562	-62.6562	-62.5938	-63.2188	-62.5938	-62.4062	-62.4375	-62.5938	-62.25	-62.7188
		-0.14	0.22	-62.5	-62.1875	-62.2188	-62.625	-62.6562	-62.4688	-63.1875	-62.4062	-62.3125	-62.4062	-62.5312	-62.1875	-62.5625
		-0.14	0.24	-62.5312	-62.25	-62.0625	-62.5312	-62.625	-62.4062	-63.0938	-62.4062	-62.1875	-62.3125	-62.5	-62.125	-62.5
		-0.14	0.26	-62.5	-62.1562	-62.0938	-62.5	-62.5	-62.5	-63	-62.4062	-62.2812	-62.3125	-62.4688	-62.0625	-62.5
		-0.14	0.28	-62.4375	-62.0625	-62	-62.5	-62.5	-62.375	-62.9688	-62.2812	-62.1562	-62.2812	-62.4062	-62	-62.5
		-0.14	0.3	-62.375	-62.0938	-61.9062	-62.4375	-62.5	-62.2812	-63.0312	-62.3125	-62.1562	-62.25	-62.4688	-62.0625	-62.4375
		-0.14	0.32	-62.375	-61.9375	-61.9375	-62.375	-62.4375	-62.375	-63	-62.2188	-62.1562	-62.1875	-62.4375	-62	-62.4688
		-0.14	0.34	-62.3438	-61.9062	-61.875	-62.2812	-62.4688	-62.375	-62.9375	-62.1875	-62.0938	-62.25	-62.375	-62.0625	-62.3438
		-0.14	0.36	-62.3125	-62.0312	-61.875	-62.3438	-62.4062	-62.25	-62.9688	-62.1875	-62.1875	-62.1875	-62.3438	-62.0312	-62.2812
		-0.14	0.38	-62.3438	-62	-61.9062	-62.3438	-62.3125	-62.2812	-62.9375	-62.1562	-62.125	-62.25	-62.3438	-62	-62.3438
		-0.14	0.4	-62.25	-61.9062	-61.9062	-62.2812	-62.3438	-62.2812	-62.9062	-62.0938	-62.0938	-62.1875	-62.3438	-62	-62.3438
		-0.14	0.42	-62.2812	-61.9688	-61.7188	-62.3125	-62.3125	-62.3125	-62.8438	-62.125	-62.0938	-62.1562	-62.3125	-61.9062	-62.2188
		-0.14	0.44	-62.3438	-61.9062	-61.75	-62.3438	-62.2812	-62.125	-62.875	-62.1562	-62.0312	-62.0938	-62.4375	-61.9375	-62.3125
		-0.14	0.46	-62.25	-61.8438	-61.8125	-62.3125	-62.3438	-62.2188	-62.7188	-62.0938	-61.9688	-62.0625	-62.375	-61.9688	-62.3125
		-0.14	0.48	-62.0625	-61.8438	-61.75	-62.3125	-62.2188	-62.1562	-62.75	-62.0938	-62	-62.1875	-62.2812	-61.9375	-62.2188
		-0.14	0.5	-62.125	-62	-61.7188	-62.2188	-62.1562	-62.0938	-62.8438	-62.0312	-62.0312	-62.0938	-62.4375	-61.8438	-62.2812
		-0.14	0.52	-62.125	-61.875	-61.7188	-62.1562	-62.3125	-62.2188	-62.8125	-62.0938	-62.0312	-62.1562	-62.3125	-61.9062	-62.3438
		-0.14	0.54	-62.0938	-61.7812	-61.6875	-62.2812	-62.25	-62.1875	-62.8125	-62.1562	-62.125	-62.1562	-62.3438	-61.875	-62.25
		-0.14	0.56	-62.1562	-61.9062	-61.6875	-62.1875	-62.375	-62.125	-62.875	-62.125	-62	-62.0312	-62.3125	-62	-62.2812
		-0.14	0.58	-62.1562	-61.8438	-61.6562	-62.1875	-62.3438	-62.0625	-62.6875	-62.0938	-62.0938	-62.0312	-62.2812	-62	-62.3125
		-0.14	0.6	-62.0625	-61.75	-61.7812	-62.1875	-62.3438	-62.1562	-62.75	-62.1562	-62.0938	-62.1875	-62.3125	-61.8438	-62.2188
		-0.14	0.62	-62.0938	-61.875	-61.7188	-62.25	-62.25	-62.0938	-62.8438	-62	-62	-62.0625	-62.2812	-61.875	-62.2812
		-0.14	0.64	-62.0938	-61.75	-61.6562	-62.1562	-62.3438	-62.0938	-62.875	-62.0938	-62.0625	-62.0312	-62.2812	-61.9375	-62.2812
		-0.14	0.66	-62.1562	-61.7188	-61.6562	-62.2188	-62.3125	-62.0938	-62.75	-62	-62	-62.0312	-62.2188	-61.8125	-62.2188
		-0.14	0.68	-62.0312	-61.8438	-61.5938	-62.25	-62.375	-62.0938	-62.8438	-62.0312	-61.9688	-61.6562	-62.1875	-61.7188	-62.125
		-0.14	0.7	-61.9062	-61.6875	-61.5938	-62.125	-62.3125	-62.0312	-62.8125	-62.0938	-61.9062	-61.7188	-62.0625	-61.5938	-62.1562
		-0.14	0.72	-61.9062	-61.5312	-61.5	-62.0625	-62.3125	-62	-62.875	-61.9688	-61.8438	-61.625	-61.9688	-61.5	-61.9688
		-0.14	0.74	-61.875	-61.5	-61.5	-61.875	-62.3125	-61.9688	-62.8125	-61.875	-61.7188	-61.375	-61.7188	-61.3125	-61.7812
		-0.14	0.76	-61.7812	-61.375	-61.3438	-61.75	-62.0938	-61.8438	-62.5625	-61.7812	-61.6875	-61.2812	-61.4375	-61.2188	-61.625
		-0.14	0.78	-61.6562	-61.2812	-61.25	-61.6562	-62	-61.7188	-62.4062	-61.75	-61.5	-61.1875	-61.2812	-61.1875	-61.4375
		-0.14	0.8	-61.7188	-61.0938	-61.0938	-61.5	-61.8125	-61.625	-62.2188	-61.6562	-61.4062	-60.9375	-61	-61.0938	-61.1562
		-0.14	0.82	-61.5312	-61.0938	-60.8438	-61.3125	-61.5625	-61.5312	-61.875	-61.4375	-61.25	-60.75	-60.7812	-60.9375	-60.9688
		-0.14	0.84	-61.3438	-60.9062	-60.5312	-61.1562	-61.3438	-61.25	-61.6875	-61.3125	-61.125	-60.6562	-60.5312	-60.8125	-60.7188
		-0.14	0.86	-61.2812	-60.5	-60.2188	-61	-61.0938	-61.0625	-61.4688	-61.1562	-60.9375	-60.4375	-60.2812	-60.5938	-60.5
		-0.14	0.88	-61.0938	-60.3125	-59.875	-60.7812	-60.6562	-60.75	-61.125	-60.9688	-60.6875	-60.0312	-59.9062	-60.5312	-60.2188
		-0.14	0.9	-60.8438	-59.9688	-59.4062	-60.5312	-60.2812	-60.5938	-60.7188	-60.75	-60.2812	-59.8438	-59.5312	-60.4062	-59.9375
		-0.14	0.92	-60.5312	-59.4688	-58.6875	-60.1562	-59.7812	-60.25	-60.25	-60.375	-59.875	-59.4375	-58.875	-60.0938	-59.5312
		-0.14	0.94	-60.1875	-59.0938	-58.0625	-59.5	-59.3125	-59.5312	-59.625	-59.8125	-59.4062	-58.75	-58.1562	-59.5938	-58.875
		-0.14	0.96	-59.5938	-58.4375	-57.2812	-58.9375	-58.6562	-59	-58.9688	-59.25	-58.6562	-57.9688	-57.3438	-59.0312	-58.2812
		-0.14	0.98	-58.7812	-57.5625	-56.1562	-57.9688	-58.1562	-58.0938	-58.0938	-58.3125	-57.8125	-56.9688	-56.2812	-58.2188	-57.375
		-0.14	1	-57.9375	-56.7188	-55	-56.9062	-57.4688	-57.1875	-57.125	-57.375	-56.9375	-55.9062	-55.4375	-57.1562	-56.375
		-0.14	1.02	-56.8438	-55.9375	-53.9688	-55.7188	-56.8438	-56.25	-56.1562	-56.375	-55.7812	-54.9688	-54.2812	-56	-55.2812
		-0.14	1.04	-55.4688	-54.9688	-52.5312	-54.5	-56.0312	-55.0938	-54.9688	-55.125	-54.6875	-53.875	-53.1875	-54.625	-53.9375
		-0.14	1.06	-54.0625	-53.875	-51.25	-53.1875	-55.1875	-54	-53.9062	-53.875	-53.5312	-52.625	-52.1562	-53.2812	-52.375
		-0.14	1.08	-52.625	-53	-50.0312	-52.0938	-54.25	-53	-52.9375	-52.7812	-52.4062	-51.6562	-51.0312	-51.9062	-50.9688
		-0.14	1.1	-51.125	-52	-48.7812	-50.9688	-53.3438	-52.125	-51.875	-51.7812	-51.3125	-50.7188	-50.2188	-50.625	-49.5
		-0.14	1.12	-49.75	-51.0938	-47.3438	-49.9688	-52.375	-51.125	-50.9375	-50.8125	-50.2812	-49.7812	-49.3125	-49.2812	-47.9688
		-0.14	1.14	-48.5	-50.2812	-45.375	-49	-51.4688	-50.4688	-50.1875	-50.0938	-49.3125	-48.9688	-48.3125	-48.0312	-46.25
		-0.14	1.16	-47.1562	-49.5938	-42.2188	-48.0938	-50.7812	-49.875	-49.5	-49.3125	-48.625	-48.125	-47.125	-46.5625	-43.8438
		-0.14	1.18	-44.9375	-48.9062	-37.6875	-46.6875	-50.0312	-49.25	-48.9375	-48.5938	-47.5938	-46.7812	-45.0625	-44.0938	-40.0312
		-0.14	1.2	-41.5625	-48.0625	-31.4375	-44.2188	-49.3125	-48.625	-48.3125	-47.8438	-45.875	-44.5	-41.5312	-40.25	-34.5625
		-0.14	1.22	-36.8125	-47	-23.0938	-40.4062	-48.7188	-47.3438	-47.1562	-46.2812	-42.9688	-40.8438	-36.6562	-35.0625	-27.4375
		-0.14	1.24	-30.2812	-44.9375	-12.5938	-35.0625	-47.8125	-45.0625	-45.1562	-43.625	-38.75	-35.6562	-30.125	-27.9688	-17.875
		-0.14	1.26	-21.5	-41.5312	-1.65625	-28.2812	-46.125	-41.3438	-41.625	-39.6562	-33.0312	-28.8438	-21.2188	-18.4062	-6.84375
		-0.14	1.28	-10.9062	-36.8438	7.65625	-19.0625	-43.1562	-36.3438	-36.7812	-34.25	-25.4375	-19.8438	-10.5312	-7.4375	3.4375
		-0.14	1.3	0	-30.6562	14.25	-8.1875	-38.875	-29.8125	-30.5	-27.1875	-15.5312	-9.03125	0.0625	3.0625	11.4062
		-0.14	1.32	8.96875	-22.2188	17.1875	2.21875	-33.25	-21.1562	-22.0312	-17.7812	-4.5625	1.53125	9.09375	11.3125	16.2812
		-0.14	1.34	15	-11.8438	16.5	10.5	-25.7188	-10.625	-11.5938	-6.96875	5.15625	10	15	16.25	17.3125
		-0.14	1.36	17.3125	-1.1875	12.375	15.6875	-15.9062	0.0625	-0.9375	3.25	12.5312	15.5	17.2188	17.5625	14.7812
		-0.14	1.38	15.875	8	5.9375	17.4375	-5.03125	8.84375	8.25	11.25	16.5312	17.3438	15.7812	15.1562	9.375
		-0.14	1.4	11.3438	14.375	-2.03125	15	4.8125	14.75	14.4375	16	16.625	15.3438	11.0938	9.8125	2.125
		-0.14	1.42	4.5	17.125	-10.5938	9.9375	12.3438	17.1875	17.0625	17	13.5625	10.5625	4.5	2.5	-6.21875
		-0.14	1.44	-3.5	16.2188	-19.3125	2.84375	16.4375	15.875	16.125	14.5	7.78125	3.71875	-3.5625	-5.9375	-14.875
		-0.14	1.46	-12.2812	12.25	-27.4688	-5.5625	16.8438	11.5	11.75	9.1875	0.15625	-4.5	-12.3125	-14.7812	-23.5
		-0.14	1.48	-20.9375	5.6875	-35	-14.3438	13.8125	4.90625	5.15625	2	-8.15625	-13.1562	-21.0625	-23.5	-31.4375
		-0.14	1.5	-29.1562	-2.125	-41.3438	-23.125	8	-3.21875	-2.875	-6.28125	-16.9062	-21.7812	-29.3125	-31.5312	-38.3438
		-0.14	1.52	-36.5312	-10.75	-46.7188	-31.3125	0.5	-11.9062	-11.625	-15.0312	-25.5	-29.875	-36.5625	-38.5938	-44.1875
		-0.14	1.54	-42.6875	-19.5	-51.0625	-38.3438	-7.78125	-20.6562	-20.5	-23.5938	-33.1562	-37.0938	-42.7812	-44.625	-49.125
		-0.14	1.56	-47.8438	-27.8125	-54.5	-44.4375	-16.6562	-28.8438	-28.7188	-31.5625	-39.8438	-43.2188	-48.0312	-49.4375	-53.0312
		-0.14	1.58	-52.0938	-35.2812	-57.1875	-49.375	-25.125	-36.1562	-36.1875	-38.5938	-45.4688	-48.2188	-52.125	-53.3125	-56.125
		-0.14	1.6	-55.2812	-41.6875	-59.2812	-53.2812	-32.9375	-42.5625	-42.4688	-44.5	-50	-52.375	-55.375	-56.3438	-58.5
		-0.14	1.62	-57.7812	-47.0938	-60.9062	-56.375	-39.6562	-47.7188	-47.7812	-49.4062	-53.7188	-55.5625	-57.9688	-58.7812	-60.4062
		-0.14	1.64	-59.9375	-51.4375	-62.125	-58.8125	-45.4375	-51.8438	-51.9688	-53.2188	-56.6875	-58.1875	-60	-60.4688	-61.75
		-0.14	1.66	-61.4375	-54.8438	-63	-60.6875	-50.125	-55.25	-55.2188	-56.2812	-58.8438	-60.1875	-61.5312	-61.9688	-62.8125
		-0.14	1.68	-62.5625	-57.4062	-63.6562	-62.0938	-53.7188	-57.8438	-57.9062	-58.625	-60.625	-61.6875	-62.6875	-62.9688	-63.5938
		-0.14	1.7	-63.4688	-59.6562	-64.0312	-63.2812	-56.7812	-59.7188	-59.875	-60.5	-61.9375	-62.7812	-63.5625	-63.7188	-64.0312
		-0.14	1.72	-64.1562	-61.2812	-64.375	-64.0312	-59.0938	-61.3438	-61.4375	-61.7812	-62.8438	-63.6562	-64.1875	-64.3438	-64.4375
		-0.14	1.74	-64.5625	-62.5	-64.5625	-64.5312	-60.8125	-62.5938	-62.5938	-62.7812	-63.6875	-64.4062	-64.6875	-64.7188	-64.8125
		-0.14	1.76	-64.9375	-63.5	-64.7812	-65.0938	-62.2188	-63.4375	-63.4062	-63.6562	-64.3125	-64.875	-65.0625	-65	-64.875
		-0.14	1.78	-65.0625	-64.125	-64.9062	-65.4062	-63.2188	-64.0312	-64.0938	-64.1562	-64.5938	-65.2812	-65.2812	-65.125	-65
		-0.14	1.8	-65.2812	-64.5938	-64.8125	-65.5	-64.0312	-64.5	-64.5312	-64.625	-64.9375	-65.4062	-65.5	-65.2812	-65.125
		-0.14	1.82	-65.375	-64.875	-64.9375	-65.6562	-64.5312	-64.8438	-64.8438	-64.9062	-65.1562	-65.5	-65.5938	-65.4688	-65.2188
		-0.14	1.84	-65.3125	-65.1875	-64.9688	-65.8438	-64.9375	-65	-65.2188	-65.0938	-65.25	-65.6562	-65.5625	-65.4062	-65.1562
		-0.14	1.86	-65.375	-65.375	-64.875	-65.8438	-65.1875	-65.2188	-65.375	-65.1562	-65.375	-65.7812	-65.6562	-65.3438	-65.25
		-0.14	1.88	-65.2812	-65.5	-64.9688	-65.9688	-65.4062	-65.3125	-65.4375	-65.3438	-65.375	-65.8438	-65.625	-65.4688	-65.1875
		-0.14	1.9	-65.1562	-65.5312	-64.9062	-66.0312	-65.5312	-65.375	-65.5312	-65.4062	-65.3438	-65.9062	-65.5625	-65.375	-65.0938
		-0.14	1.92	-65.1562	-65.6562	-64.8438	-66	-65.5938	-65.3438	-65.5	-65.4688	-65.4375	-65.9375	-65.5312	-65.25	-65.0938
		-0.14	1.94	-65.1562	-65.75	-64.7188	-66.0312	-65.8438	-65.375	-65.5625	-65.4688	-65.4062	-65.875	-65.5	-65.2188	-65.1875
		-0.14	1.96	-65	-65.6875	-64.75	-66	-65.875	-65.375	-65.5312	-65.3438	-65.3125	-65.8125	-65.4375	-65.2188	-65.125
		-0.14	1.98	-65.0312	-65.6562	-64.75	-65.9062	-65.75	-65.25	-65.5938	-65.4688	-65.2188	-65.8125	-65.4375	-65.1875	-65.0938
		-0.14	2	-64.9375	-65.7188	-64.75	-65.75	-65.8125	-65.2188	-65.5	-65.3438	-65.25	-65.7812	-65.375	-65.25	-65.0938
		-0.14	2.02	-64.8438	-65.6562	-64.6875	-65.875	-65.8125	-65.2812	-65.5625	-65.375	-65.3125	-65.7812	-65.2188	-65.2188	-65.0312
		-0.14	2.04	-64.8438	-65.6562	-64.5938	-65.875	-65.75	-65.2188	-65.5312	-65.3125	-65.25	-65.7812	-65.1562	-65.0938	-64.9375
		-0.14	2.06	-64.7812	-65.6562	-64.6562	-65.8125	-65.75	-65.0312	-65.5312	-65.2812	-65.0312	-65.75	-65.0625	-65.2188	-64.875
		-0.14	2.08	-64.6875	-65.5938	-64.6875	-65.8125	-65.8438	-65.0938	-65.5625	-65.1562	-65	-65.625	-65	-65.125	-64.9375
		-0.14	2.1	-64.625	-65.5312	-64.6875	-65.8125	-65.7812	-64.9688	-65.4375	-65.1875	-64.9375	-65.6562	-65.0625	-65.125	-64.875
		-0.14	2.12	-64.5938	-65.5	-64.7188	-65.6875	-65.7188	-64.9688	-65.4375	-65.0312	-65.0625	-65.6562	-64.9688	-65.1562	-64.9062
		-0.14	2.14	-64.5312	-65.4062	-64.6875	-65.6562	-65.7812	-64.9375	-65.4062	-65.0312	-64.9375	-65.6562	-64.9062	-65.0938	-65
		-0.14	2.16	-64.6562	-65.4688	-64.7812	-65.7188	-65.6875	-64.9688	-65.4062	-65.0625	-64.9375	-65.6562	-64.9688	-65.0938	-64.9375
		-0.14	2.18	-64.5625	-65.375	-64.8125	-65.6875	-65.6875	-64.8125	-65.375	-65	-64.9688	-65.6562	-65.0312	-65.0625	-64.875
		-0.14	2.2	-64.5625	-65.4688	-64.7812	-65.6562	-65.7188	-64.9062	-65.4375	-65.0312	-64.8438	-65.6562	-64.9688	-64.9688	-64.9062
		-0.14	2.22	-64.6562	-65.4688	-64.7812	-65.7188	-65.6875	-64.8125	-65.375	-65.0312	-64.9688	-65.5938	-65	-64.9375	-64.9688
		-0.14	2.24	-64.5938	-65.375	-64.7188	-65.6562	-65.5312	-64.8125	-65.3438	-64.9688	-64.9688	-65.5625	-65	-65.0625	-64.8438
		-0.14	2.26	-64.5938	-65.4062	-64.7812	-65.6875	-65.5938	-64.875	-65.3438	-64.9688	-64.9375	-65.625	-64.875	-65.0312	-64.875
		-0.14	2.28	-64.625	-65.5625	-64.8125	-65.75	-65.5938	-64.8125	-65.3438	-64.9688	-65	-65.625	-64.9688	-65.0938	-64.9375
		-0.14	2.3	-64.5938	-65.5	-64.8125	-65.75	-65.5	-64.7812	-65.25	-64.9375	-65.0312	-65.5625	-64.9688	-65.0312	-64.9375
		-0.14	2.32	-64.75	-65.5	-64.8438	-65.75	-65.5312	-64.8125	-65.2812	-65.0312	-64.9375	-65.5312	-64.9375	-65.0312	-64.9375
		-0.14	2.34	-64.5938	-65.5	-64.8438	-65.7188	-65.5312	-64.7812	-65.2812	-65.0625	-64.9375	-65.5312	-65.0312	-65.0625	-64.9375
		-0.14	2.36	-64.6875	-65.4688	-64.9688	-65.6875	-65.5	-64.7812	-65.375	-65	-65.0312	-65.5	-65	-65.1562	-64.9688
		-0.14	2.38	-64.6875	-65.375	-64.9688	-65.6875	-65.5312	-64.7812	-65.4062	-65	-65	-65.625	-64.9375	-65.1875	-64.9688
		-0.14	2.4	-64.6562	-65.4688	-65.0312	-65.75	-65.5312	-64.7188	-65.3125	-65	-65.0938	-65.5625	-64.9688	-65.1562	-65.0312
		-0.14	2.42	-64.7188	-65.4062	-65	-65.8125	-65.5312	-64.75	-65.5	-65.0312	-65.0938	-65.5312	-65.0625	-65.1562	-65.0625
		-0.14	2.44	-64.75	-65.3125	-65.0625	-65.6562	-65.5312	-64.7812	-65.5	-65.0312	-65.0625	-65.5312	-65.0625	-65.1562	-65.0625
		-0.14	2.46	-64.75	-65.3125	-65	-65.7188	-65.5938	-64.75	-65.5	-65	-65.125	-65.5938	-65.0938	-65.2812	-65.0625
		-0.14	2.48	-64.7812	-65.4375	-64.9688	-65.7812	-65.4688	-64.8438	-65.5625	-65	-65.2188	-65.6562	-65.1875	-65.2188	-65.1562
		-0.14	2.5	-64.7188	-65.4062	-65.125	-65.7812	-65.5312	-64.8438	-65.4688	-65.0938	-65.125	-65.6562	-65.125	-65.2812	-65.25
		-0.14	2.52	-64.7812	-65.2812	-65.125	-65.7188	-65.5938	-64.875	-65.4375	-65.1562	-65.125	-65.6875	-65.1562	-65.375	-65.0938
		-0.14	2.54	-64.9375	-65.3438	-65.125	-65.875	-65.4375	-64.875	-65.4688	-65.0938	-65.1562	-65.625	-65.1562	-65.3125	-65.1562
		-0.14	2.56	-64.8125	-65.4062	-65.125	-65.875	-65.5312	-64.9375	-65.5938	-65.1562	-65.1875	-65.6875	-65.1875	-65.3125	-65.1875
		-0.14	2.58	-64.8125	-65.3125	-65.125	-65.9062	-65.625	-64.9062	-65.5938	-65.2188	-65.2188	-65.7188	-65.25	-65.4375	-65.1562
		-0.14	2.6	-64.9688	-65.3438	-65.125	-65.9375	-65.7188	-64.9688	-65.6562	-65.25	-65.2812	-65.6875	-65.3438	-65.3125	-65.1562
		-0.14	2.62	-64.9375	-65.4375	-65.1875	-65.9375	-65.5625	-65	-65.5625	-65.2188	-65.3125	-65.7188	-65.25	-65.375	-65.3125
		-0.14	2.64	-64.9375	-65.5	-65.125	-65.9688	-65.6875	-65	-65.5938	-65.25	-65.3438	-65.7812	-65.25	-65.4062	-65.2188
		-0.14	2.66	-65	-65.4375	-65.2188	-65.9688	-65.5938	-64.9688	-65.6562	-65.2188	-65.4375	-65.75	-65.3438	-65.4062	-65.2188
		-0.14	2.68	-64.9375	-65.4688	-65.2188	-65.9062	-65.5938	-65.0938	-65.7188	-65.1875	-65.4375	-65.7812	-65.3438	-65.375	-65.2812
		-0.14	2.7	-65.0312	-65.5312	-65.2812	-65.9375	-65.6562	-65	-65.6562	-65.2812	-65.375	-65.8125	-65.4375	-65.375	-65.3438
		-0.14	2.72	-65.0312	-65.5	-65.3438	-65.9062	-65.6875	-65.0312	-65.6875	-65.25	-65.4062	-65.8438	-65.4375	-65.4062	-65.2812
		-0.14	2.74	-65.0625	-65.5312	-65.3125	-66.0938	-65.625	-65.1562	-65.6875	-65.2812	-65.4062	-65.75	-65.5	-65.5	-65.4375
		-0.14	2.76	-65.1562	-65.5938	-65.2812	-66.0625	-65.625	-65.125	-65.7188	-65.3438	-65.4688	-65.8438	-65.5	-65.5	-65.4062
		-0.14	2.78	-65.2188	-65.5938	-65.3438	-66.0312	-65.625	-65.1562	-65.8438	-65.25	-65.5	-65.8438	-65.5312	-65.4375	-65.4062
		-0.14	2.8	-65.3438	-65.5312	-65.2812	-66.0312	-65.6875	-65.1875	-65.8125	-65.3438	-65.5312	-65.9062	-65.4375	-65.5625	-65.4062
		-0.14	2.82	-65.2812	-65.5938	-65.3125	-66.1562	-65.7188	-65.125	-65.7812	-65.375	-65.5	-65.9062	-65.5312	-65.5312	-65.4688
		-0.14	2.84	-65.25	-65.625	-65.4375	-66.125	-65.75	-65.2188	-65.8438	-65.4062	-65.5312	-65.875	-65.5938	-65.5	-65.4062
		-0.14	2.86	-65.3125	-65.625	-65.4062	-66.0938	-65.7188	-65.125	-65.8125	-65.3438	-65.5625	-65.9062	-65.5625	-65.5625	-65.4688
		-0.14	2.88	-65.3438	-65.5312	-65.375	-66.1562	-65.8125	-65.2188	-65.875	-65.375	-65.5312	-65.9375	-65.6562	-65.5938	-65.4688
		-0.14	2.9	-65.3125	-65.5938	-65.4062	-66.0625	-65.875	-65.1875	-65.9062	-65.3438	-65.5312	-65.9375	-65.6875	-65.5312	-65.5312
		-0.14	2.92	-65.3438	-65.5625	-65.375	-66.2188	-65.8125	-65.1875	-65.8438	-65.4375	-65.6562	-65.8438	-65.6562	-65.5938	-65.4062
		-0.14	2.94	-65.4062	-65.4688	-65.4688	-66.1562	-65.8438	-65.3125	-65.9375	-65.4062	-65.5625	-65.9062	-65.75	-65.5312	-65.4688
		-0.14	2.96	-65.3125	-65.5	-65.5	-66.1562	-65.9062	-65.2812	-65.9375	-65.5	-65.6562	-66.0312	-65.8125	-65.5625	-65.5
		-0.14	2.98	-65.4062	-65.5938	-65.5	-66.0938	-65.9062	-65.25	-65.9688	-65.4062	-65.6875	-65.9688	-65.75	-65.6562	-65.5625
		-0.14	3	-65.3438	-65.625	-65.5	-66.1562	-65.7812	-65.25	-65.875	-65.4375	-65.6562	-65.9688	-65.75	-65.5625	-65.5
		-0.14	3.02	-65.4062	-65.5938	-65.5938	-66.1562	-65.8438	-65.3438	-66.0938	-65.5	-65.6875	-66.0312	-65.7812	-65.6562	-65.5
		-0.14	3.04	-65.4688	-65.5938	-65.5312	-66.0938	-65.8125	-65.3438	-65.9062	-65.4688	-65.8438	-66.0312	-65.7812	-65.625	-65.5625
		-0.14	3.06	-65.4688	-65.5938	-65.6562	-66.125	-65.7188	-65.3125	-66	-65.5312	-65.75	-65.9375	-65.8125	-65.5938	-65.4688
		-0.14	3.08	-65.5312	-65.625	-65.5625	-66.0938	-65.875	-65.375	-66.0312	-65.4688	-65.6562	-65.9688	-65.7812	-65.5938	-65.5312
		-0.14	3.1	-65.5	-65.5938	-65.625	-66.0312	-65.9062	-65.3125	-65.9688	-65.4375	-65.7188	-65.9688	-65.6562	-65.6562	-65.625
		-0.14	3.12	-65.4375	-65.7188	-65.625	-66.0625	-65.75	-65.4062	-66.0312	-65.5312	-65.8125	-66	-65.9062	-65.7188	-65.5312
		-0.14	3.14	-65.4375	-65.5625	-65.5625	-66.125	-65.75	-65.4375	-66.0938	-65.5938	-65.75	-66.0312	-65.9062	-65.6562	-65.5625
		-0.14	3.16	-65.4688	-65.5	-65.5	-66.125	-65.875	-65.375	-66.0625	-65.5312	-65.8125	-66.0625	-65.8438	-65.75	-65.5312
		-0.14	3.18	-65.5	-65.6562	-65.625	-66.0938	-65.7188	-65.3438	-66.0938	-65.5938	-65.75	-66.0938	-65.8438	-65.75	-65.5938
		-0.14	3.2	-65.5	-65.6875	-65.5312	-66.1562	-65.7188	-65.375	-66.0938	-65.5625	-65.7188	-66.0625	-65.8438	-65.7812	-65.5
		-0.14	3.22	-65.5312	-65.5938	-65.5625	-66.0312	-65.6562	-65.4375	-66.2188	-65.2812	-65.7812	-66.0625	-65.9688	-65.7188	-65.5625
		-0.14	3.24	-65.5312	-65.6875	-65.6875	-66.0938	-65.7812	-65.4062	-66.0938	-65.625	-65.75	-66.2188	-65.8438	-65.7812	-65.5312
		-0.14	3.26	-65.5625	-65.75	-65.5312	-66.1562	-65.7812	-65.375	-66.125	-65.6562	-65.75	-66.0312	-65.8438	-65.625	-65.5
		-0.14	3.28	-65.5625	-65.6875	-65.5938	-66.2188	-65.7812	-65.4375	-66.125	-65.5	-65.7188	-66.125	-65.8438	-65.6562	-65.5
		-0.14	3.3	-65.5	-65.625	-65.6562	-66.2188	-65.875	-65.4062	-66.1562	-65.75	-65.875	-66.0625	-65.8438	-65.625	-65.625
		-0.14	3.32	-65.5938	-65.6562	-65.5938	-66.2812	-65.7188	-65.3438	-66.25	-65.625	-65.8125	-66.1562	-65.9062	-65.6562	-65.625
		-0.14	3.34	-65.5	-65.6562	-65.6562	-66.2188	-65.8125	-65.375	-66.1562	-65.6562	-65.7812	-66.0625	-65.875	-65.9062	-65.625
		-0.14	3.36	-65.5	-65.6562	-65.5625	-66.25	-65.7188	-65.4062	-66.1562	-65.6875	-65.9062	-66.0312	-65.9062	-65.6562	-65.6562
		-0.14	3.38	-65.5938	-65.7812	-65.6562	-66.1562	-65.75	-65.4375	-66.1875	-65.6875	-65.8438	-66.125	-65.9062	-65.5938	-65.7188
		-0.14	3.4	-65.5312	-65.75	-65.6562	-66.0938	-65.6875	-65.4375	-66.1562	-65.7188	-65.8125	-66	-66.0312	-65.7812	-65.5312
		-0.14	3.42	-65.5312	-65.75	-65.6875	-66.0312	-65.7812	-65.4062	-66.2188	-65.6875	-65.7812	-66.125	-65.9688	-65.6875	-65.6562
		-0.14	3.44	-65.5312	-65.75	-65.7188	-66.125	-65.8438	-65.5	-66.2812	-65.75	-65.9375	-66.1562	-65.9688	-65.7188	-65.625
		-0.14	3.46	-65.5625	-65.6875	-65.7812	-66.1562	-65.7188	-65.4375	-66.25	-65.5938	-65.75	-66.1562	-65.9062	-65.8125	-65.6562
		-0.14	3.48	-65.5938	-65.6875	-65.6562	-66.1562	-65.8125	-65.375	-66.2812	-65.6875	-65.8125	-66.1562	-65.9375	-65.7188	-65.5312
		-0.14	3.5	-65.625	-65.75	-65.5312	-66.0312	-65.9062	-65.4375	-66.25	-65.7812	-65.9375	-66.1562	-65.9688	-65.7188	-65.6562
		-0.14	3.52	-65.5938	-65.6562	-65.6875	-66.0625	-65.7812	-65.4688	-66.25	-65.75	-65.8125	-66.1875	-66.0312	-65.6875	-65.6562
		-0.14	3.54	-65.5312	-65.6875	-65.7188	-66.0625	-65.75	-65.4062	-66.2188	-65.8125	-65.8438	-66.1562	-65.9062	-65.75	-65.5938
		-0.14	3.56	-65.5	-65.7812	-65.6875	-66	-65.7812	-65.5	-66.1562	-65.8438	-65.8438	-66.1562	-65.9375	-65.5938	-65.6875
		-0.14	3.58	-65.5	-65.75	-65.75	-66	-65.8125	-65.4375	-66.125	-65.6875	-65.8125	-66.0938	-65.9375	-65.5938	-65.6562
		-0.14	3.6	-65.5312	-65.6562	-65.6562	-66.125	-65.7812	-65.4375	-66.1875	-65.75	-65.6875	-66.0625	-65.7812	-65.6562	-65.6562
		-0.14	3.62	-65.5938	-65.6875	-65.7812	-66	-65.875	-65.5	-66.1875	-65.7188	-65.7812	-66.0938	-65.8125	-65.5938	-65.6875
		-0.14	3.64	-65.5625	-65.7188	-65.75	-65.9375	-65.875	-65.5	-66.2188	-65.7188	-65.8125	-66.1562	-65.9688	-65.625	-65.625
		-0.14	3.66	-65.5312	-65.6875	-65.6875	-66.0938	-65.9062	-65.4062	-66.25	-65.7188	-65.8438	-66.125	-65.8438	-65.625	-65.6875
		-0.14	3.68	-65.5938	-65.6875	-65.6875	-66.0625	-65.875	-65.5	-66.3125	-65.7812	-65.7812	-66.125	-65.7812	-65.5625	-65.6562
		-0.14	3.7	-65.5	-65.6875	-65.7188	-66.0938	-65.9688	-65.5	-66.3125	-65.7188	-65.7812	-66.0625	-65.9062	-65.625	-65.5938
		-0.14	3.72	-65.5312	-65.6875	-65.5938	-66.1562	-65.8438	-65.4062	-66.1875	-65.625	-65.7188	-66.0312	-65.9688	-65.6562	-65.6562
		-0.14	3.74	-65.5312	-65.7812	-65.625	-66.0938	-65.9062	-65.4062	-66.2812	-65.625	-65.75	-66.0938	-65.875	-65.5625	-65.5938
		-0.14	3.76	-65.5312	-65.6562	-65.75	-65.9375	-65.875	-65.4688	-66.2812	-65.5312	-65.75	-66.0938	-65.8125	-65.5625	-65.625
		-0.14	3.78	-65.5	-65.6875	-65.6562	-65.9375	-65.8125	-65.4688	-66.2188	-65.625	-65.75	-66.0625	-65.8438	-65.625	-65.5938
		-0.14	3.8	-65.4688	-65.7188	-65.6562	-66.0312	-65.875	-65.4375	-66.2812	-65.5938	-65.7812	-66.0312	-65.9062	-65.5938	-65.6562
		-0.14	3.82	-65.4375	-65.6562	-65.6562	-65.9062	-65.875	-65.4375	-66.1562	-65.6562	-65.8125	-66.0625	-65.8438	-65.5938	-65.5
		-0.14	3.84	-65.5312	-65.6875	-65.5625	-65.9062	-65.8125	-65.5312	-66.2188	-65.5625	-65.7812	-66.1562	-65.8438	-65.5938	-65.5
		-0.14	3.86	-65.4688	-65.625	-65.5625	-66	-65.8438	-65.4062	-66.2812	-65.6562	-65.7812	-66.1562	-65.8125	-65.5	-65.6562
		-0.14	3.88	-65.5625	-65.6562	-65.5625	-66	-65.9375	-65.4062	-66.3125	-65.75	-65.875	-66.0938	-65.875	-65.625	-65.5312
		-0.14	3.9	-65.5312	-65.625	-65.5	-66	-65.875	-65.5	-66.25	-65.6562	-65.8125	-66.0312	-65.9062	-65.625	-65.4688
		-0.14	3.92	-65.4688	-65.7188	-65.5625	-66.0312	-65.875	-65.5	-66.25	-65.625	-65.7188	-66.1562	-65.7812	-65.6562	-65.5625
		-0.14	3.94	-65.5	-65.5938	-65.5625	-66.0312	-65.875	-65.5	-66.1562	-65.6875	-65.8438	-66.0625	-65.8438	-65.5312	-65.6875
		-0.14	3.96	-65.5	-65.5938	-65.5312	-65.9688	-65.9375	-65.4375	-66.125	-65.5625	-65.875	-66.0938	-65.8438	-65.5	-65.5312
		-0.14	3.98	-65.4688	-65.625	-65.625	-65.9375	-65.875	-65.3438	-66.1562	-65.5625	-65.8438	-66.1562	-65.875	-65.5625	-65.5625
		-0.14	4	-65.4688	-65.625	-65.5312	-66	-66	-65.4062	-66.125	-65.6562	-65.9688	-66.0312	-65.8125	-65.5938	-65.625
		-0.14	4.02	-65.5312	-65.6562	-65.5938	-65.9375	-65.9062	-65.375	-66.1875	-65.5625	-65.8438	-66.0625	-65.9062	-65.5625	-65.5625
		-0.14	4.04	-65.4375	-65.6562	-65.5938	-65.9375	-65.875	-65.4062	-66.2812	-65.5625	-65.75	-66.0312	-65.9375	-65.5625	-65.625
		-0.14	4.06	-65.4062	-65.6875	-65.5312	-66.0312	-65.9062	-65.375	-66.1875	-65.5938	-65.7812	-66.0938	-65.8125	-65.5	-65.5938
		-0.14	4.08	-65.4375	-65.7188	-65.5	-65.9688	-65.875	-65.4375	-66.2812	-65.6562	-65.875	-65.9688	-65.7812	-65.5938	-65.5625
		-0.14	4.1	-65.4062	-65.8438	-65.5	-65.875	-65.9688	-65.4375	-66.2812	-65.6562	-65.9062	-65.9062	-65.8438	-65.5938	-65.5312
		-0.14	4.12	-65.4688	-65.625	-65.5	-65.9688	-65.9688	-65.5312	-66.2812	-65.7188	-65.75	-66.0938	-65.8125	-65.5312	-65.4688
		-0.14	4.14	-65.4688	-65.7188	-65.5	-65.8125	-66	-65.4688	-66.1875	-65.6875	-65.8438	-66.0312	-65.9062	-65.5625	-65.5312
		-0.14	4.16	-65.4375	-65.7188	-65.6562	-65.8438	-65.9375	-65.4688	-66.1562	-65.6562	-65.8438	-66.0625	-65.875	-65.5312	-65.5312
		-0.14	4.18	-65.4062	-65.6875	-65.5938	-65.8125	-65.8438	-65.5	-66.1562	-65.6875	-65.7188	-66.0625	-65.8438	-65.5312	-65.5312
		-0.14	4.2	-65.4688	-65.7812	-65.5938	-65.9062	-65.875	-65.5	-66.0938	-65.6875	-65.7188	-66.0938	-65.875	-65.4688	-65.5312
		-0.14	4.22	-65.4375	-65.7812	-65.5312	-65.9375	-65.875	-65.3438	-66.0625	-65.6562	-65.8438	-65.9688	-65.8125	-65.5312	-65.5625
		-0.14	4.24	-65.3125	-65.6562	-65.5	-65.875	-65.8438	-65.4375	-66.2188	-65.625	-65.7812	-66.0312	-65.6875	-65.5312	-65.5
		-0.14	4.26	-65.4062	-65.75	-65.375	-65.8438	-65.8438	-65.375	-66.2188	-65.5625	-65.75	-66.0938	-65.7188	-65.5938	-65.5
		-0.14	4.28	-65.3125	-65.6875	-65.5938	-65.9062	-65.9375	-65.4062	-66.1875	-65.5312	-65.7812	-66.0312	-65.8125	-65.5938	-65.5312
		-0.14	4.3	-65.3125	-65.5625	-65.5312	-65.9375	-65.875	-65.4062	-66.0938	-65.5938	-65.7188	-65.9062	-65.7188	-65.5625	-65.5
		-0.14	4.32	-65.375	-65.5938	-65.4062	-65.8438	-65.8438	-65.3125	-66.125	-65.625	-65.7188	-66.0312	-65.6562	-65.625	-65.4062
		-0.14	4.34	-65.2812	-65.5625	-65.4375	-65.9375	-65.875	-65.4375	-66.0625	-65.6562	-65.7812	-65.9375	-65.7188	-65.5312	-65.5
		-0.14	4.36	-65.1875	-65.625	-65.4375	-65.75	-65.875	-65.4688	-66.125	-65.5938	-65.7812	-65.9062	-65.75	-65.4688	-65.5312
		-0.14	4.38	-65.3438	-65.625	-65.4062	-65.75	-65.7812	-65.4062	-66.0625	-65.6875	-65.6875	-66	-65.7188	-65.5	-65.5
		-0.14	4.4	-65.25	-65.625	-65.5625	-65.7812	-65.7812	-65.4062	-66.0938	-65.5625	-65.75	-65.9688	-65.75	-65.5	-65.4688
		-0.14	4.42	-65.2812	-65.625	-65.4688	-65.7812	-65.875	-65.375	-66.125	-65.5938	-65.7188	-65.9375	-65.9062	-65.4375	-65.5312
		-0.14	4.44	-65.3125	-65.5938	-65.4375	-65.7812	-65.6875	-65.3438	-65.9375	-65.6562	-65.6562	-65.9375	-65.75	-65.4062	-65.5
		-0.14	4.46	-65.2188	-65.5938	-65.4688	-65.7188	-65.7188	-65.375	-65.9688	-65.6562	-65.6875	-65.9688	-65.7188	-65.5	-65.4375
		-0.14	4.48	-65.375	-65.5625	-65.4062	-65.7812	-65.8125	-65.5	-65.9688	-65.5938	-65.7188	-66	-65.6875	-65.4688	-65.5
		-0.14	4.5	-65.3438	-65.5625	-65.375	-65.6562	-65.75	-65.4375	-65.9688	-65.5625	-65.6562	-65.9062	-65.6562	-65.4375	-65.4375
		-0.14	4.52	-65.2812	-65.5	-65.5	-65.75	-65.75	-65.375	-65.9688	-65.5938	-65.5938	-65.9688	-65.5625	-65.375	-65.4688
		-0.14	4.54	-65.2188	-65.4375	-65.4688	-65.7188	-65.875	-65.4062	-65.9375	-65.7188	-65.5938	-66.0312	-65.7188	-65.4375	-65.4688
		-0.14	4.56	-65.3125	-65.5	-65.4062	-65.6875	-65.7812	-65.3125	-65.9688	-65.625	-65.7188	-65.9062	-65.7188	-65.3125	-65.4062
		-0.14	4.58	-65.1562	-65.4688	-65.375	-65.625	-65.7188	-65.4062	-65.9062	-65.5312	-65.625	-65.875	-65.625	-65.4688	-65.3438
		-0.14	4.6	-65.2188	-65.5	-65.4375	-65.7188	-65.75	-65.4375	-66.0312	-65.5312	-65.7188	-65.9375	-65.6562	-65.4375	-65.4375
		-0.14	4.62	-65.25	-65.4688	-65.4688	-65.6875	-65.8438	-65.3125	-66.0312	-65.5	-65.6875	-65.9375	-65.6562	-65.2812	-65.4062
		-0.14	4.64	-65.2812	-65.5	-65.3438	-65.6875	-65.8125	-65.2812	-66.0312	-65.5625	-65.7188	-65.8438	-65.7188	-65.4375	-65.3125
		-0.14	4.66	-65.2812	-65.4375	-65.2812	-65.6562	-65.8125	-65.25	-65.9688	-65.5	-65.5625	-65.8438	-65.625	-65.4062	-65.4688
		-0.14	4.68	-65.0938	-65.5	-65.3438	-65.7188	-65.8125	-65.2188	-65.9688	-65.4688	-65.7188	-65.9062	-65.6562	-65.4062	-65.3438
		-0.14	4.7	-65.0938	-65.4688	-65.375	-65.6875	-65.75	-65.2188	-66.0312	-65.5312	-65.7188	-65.75	-65.625	-65.3438	-65.375
		-0.14	4.72	-65.0625	-65.5	-65.2812	-65.625	-65.7188	-65.2812	-65.9688	-65.5	-65.5312	-65.8438	-65.5625	-65.375	-65.375
		-0.14	4.74	-65.0625	-65.4375	-65.2812	-65.7188	-65.7188	-65.3125	-65.9375	-65.4375	-65.5938	-65.9375	-65.6875	-65.3125	-65.4062
		-0.14	4.76	-65.0938	-65.4375	-65.4375	-65.6875	-65.6562	-65.2812	-66	-65.4688	-65.5625	-65.9062	-65.6562	-65.3125	-65.3125
		-0.14	4.78	-65.0938	-65.4062	-65.0938	-65.5938	-65.6875	-65.1875	-65.9688	-65.5	-65.5	-65.7812	-65.5312	-65.3125	-65.375
		-0.14	4.8	-65.2188	-65.4062	-65.1875	-65.6875	-65.7188	-65.125	-65.9062	-65.4375	-65.5312	-65.875	-65.5312	-65.375	-65.25
		-0.14	4.82	-65.1875	-65.3438	-65.2812	-65.625	-65.75	-65.1875	-65.9375	-65.4688	-65.625	-65.8125	-65.5312	-65.2812	-65.3438
		-0.14	4.84	-65.0938	-65.3125	-65.2188	-65.6562	-65.7188	-65.1562	-65.7812	-65.4062	-65.5	-65.7812	-65.4688	-65.2812	-65.2812
		-0.14	4.86	-65.1562	-65.3438	-65.2812	-65.625	-65.6875	-65.1562	-65.9375	-65.3438	-65.4688	-65.8125	-65.5	-65.3125	-65.25
		-0.14	4.88	-65.0312	-65.3438	-65.2188	-65.6562	-65.7188	-65.2812	-65.9688	-65.3438	-65.5625	-65.8438	-65.5938	-65.2812	-65.2188
		-0.14	4.9	-65	-65.2812	-65.2188	-65.6562	-65.5938	-65.1875	-65.9062	-65.4062	-65.5	-65.875	-65.5312	-65.375	-65.25
		-0.14	4.92	-65.0938	-65.3125	-65.125	-65.5625	-65.5312	-65.1875	-65.9062	-65.3125	-65.4688	-65.8438	-65.5312	-65.3438	-65.2188
		-0.14	4.94	-65.0312	-65.2812	-65.2188	-65.6875	-65.625	-65.2188	-65.8125	-65.3125	-65.5	-65.7812	-65.6562	-65.1875	-65.25
		-0.14	4.96	-64.9688	-65.25	-65.2812	-65.6875	-65.6562	-65.125	-65.8438	-65.375	-65.5312	-65.7812	-65.5625	-65.1562	-65.3125
		-0.14	4.98	-65.0312	-65.2188	-65.2188	-65.5938	-65.5625	-65.125	-65.8438	-65.3125	-65.4375	-65.7188	-65.4688	-65.2812	-65.1875
		-0.04	0	-60.9062	-60.9688	-60.8125	-60.75	-61.0312	-60.3125	-61.0312	-62.3438	-62.6562	-60.8125	-60.75	-61.2188	-61.25	-60.8125	-61.5	-61.5938	-61.6562	-61.8125	-62.3125	-62.4062	-62.5312	-62.7188	-62.6562	-63.375	-63.9375	-64.0312	-64.3438	-64.0312	-64.1875
		-0.04	0.02	-65.1562	-65.3125	-65.0938	-65.0312	-65.4375	-64.0312	-64.5312	-66.25	-66.5938	-65.0312	-64.75	-65.1562	-65.3438	-64.7812	-65.1562	-65.1875	-65.5	-65.7188	-66.2188	-66.4375	-66.4688	-66.625	-66.625	-67.3438	-67.5938	-67.7812	-67.875	-67.7188	-68
		-0.04	0.04	-68.1875	-68.2188	-68.0312	-68.0312	-68.1562	-66.4375	-66.9688	-69	-69.3438	-67.5	-67.4062	-67.875	-68.2188	-67.5	-67.9688	-67.9375	-68.1562	-68.3438	-68.8125	-69.25	-69.3438	-69.5	-69.4688	-70.2188	-70.25	-70.4688	-70.5625	-70.3438	-70.625
		-0.04	0.06	-68.0625	-68.0312	-67.9688	-67.8438	-68.0938	-66.3438	-67	-68.9375	-69.2812	-67.5	-67.4375	-67.875	-68.0312	-67.4375	-68.0625	-68.0312	-68.1562	-68.3125	-68.8125	-69.2188	-69.4062	-69.5312	-69.4688	-70.3125	-70.5	-70.6562	-70.7812	-70.5	-70.6875
		-0.04	0.08	-66.9375	-66.9688	-66.8438	-66.75	-66.9688	-65.4062	-66.0938	-67.9375	-68.2188	-66.5938	-66.4688	-66.8438	-67.0312	-66.5	-67.0625	-67.1562	-67.3125	-67.4062	-68.0312	-68.2812	-68.3438	-68.625	-68.4688	-69.25	-69.5625	-69.7812	-69.8438	-69.7812	-69.8125
		-0.04	0.1	-65.6562	-65.6562	-65.6562	-65.4375	-65.6875	-64.3125	-64.9688	-66.8125	-67.1562	-65.4062	-65.2188	-65.75	-65.9375	-65.3438	-66.0312	-66.125	-66.25	-66.375	-66.7812	-67.0312	-67.2188	-67.4062	-67.1875	-68.0312	-68.5312	-68.625	-68.8125	-68.625	-68.8438
		-0.04	0.12	-64.4688	-64.4062	-64.375	-64.2188	-64.5	-63.2188	-64.0312	-65.6875	-66.0312	-64.3125	-64.2812	-64.6562	-64.8438	-64.2812	-65.1562	-65.0625	-65.2188	-65.375	-65.7188	-65.875	-66.0938	-66.3438	-66.0625	-66.875	-67.4688	-67.625	-67.8125	-67.5938	-67.8125
		-0.04	0.14	-63.5	-63.5938	-63.4688	-63.3438	-63.5938	-62.5	-63.1875	-64.7812	-65.1562	-63.4688	-63.4375	-63.7812	-64.0312	-63.4375	-64.1562	-64.25	-64.3438	-64.5312	-64.9688	-65.0312	-65.0938	-65.2812	-65.2812	-65.875	-66.5938	-66.8125	-66.9688	-66.7812	-66.8438
		-0.04	0.16	-62.8125	-62.875	-62.7812	-62.5625	-62.75	-61.7812	-62.5312	-64.2188	-64.625	-62.8438	-62.7812	-63.1875	-63.2812	-62.8438	-63.5938	-63.5	-63.7812	-63.9688	-64.3125	-64.375	-64.4375	-64.5938	-64.5625	-65.25	-65.9688	-66.1562	-66.1875	-66.0625	-66.2812
		-0.04	0.18	-62.3125	-62.3125	-62.1875	-61.9375	-62.3125	-61.2812	-62.0625	-63.6875	-64.0625	-62.3438	-62.1875	-62.625	-62.75	-62.2188	-63.0938	-63.0938	-63.25	-63.5	-63.8125	-63.8125	-63.9375	-64.0938	-64.0312	-64.7188	-65.4688	-65.5625	-65.6875	-65.5	-65.75
		-0.04	0.2	-61.875	-61.8438	-61.7188	-61.625	-61.9688	-61.0625	-61.75	-63.2812	-63.6875	-62.0312	-61.7812	-62.1875	-62.2188	-61.8125	-62.7188	-62.7188	-62.875	-63	-63.4375	-63.375	-63.6562	-63.6562	-63.6562	-64.25	-65.0938	-65.1875	-65.3125	-65.2188	-65.3438
		-0.04	0.22	-61.5938	-61.6562	-61.4062	-61.3125	-61.5938	-60.75	-61.4062	-63.0312	-63.4375	-61.6875	-61.5625	-61.9688	-62.0625	-61.5938	-62.375	-62.4062	-62.5	-62.8438	-63.2812	-63.0938	-63.25	-63.4062	-63.3125	-64.0312	-64.8125	-64.875	-65.0312	-64.7812	-65
		-0.04	0.24	-61.3438	-61.4062	-61.2812	-61.0938	-61.4375	-60.625	-61.25	-62.8438	-63.2188	-61.3438	-61.3125	-61.625	-61.875	-61.4375	-62.1875	-62.2188	-62.3125	-62.625	-62.9062	-62.9688	-63.0312	-63.2812	-63.1562	-63.8125	-64.5312	-64.6875	-64.8438	-64.5938	-64.9062
		-0.04	0.26	-61.0938	-61.1562	-61.0312	-60.875	-61.3125	-60.5	-61.1875	-62.6562	-63.0625	-61.25	-61.0625	-61.5625	-61.7188	-61.1562	-61.8438	-62	-62.1875	-62.375	-62.7812	-62.7812	-62.9062	-63	-63	-63.5625	-64.3438	-64.5312	-64.7188	-64.4062	-64.7188
		-0.04	0.28	-61	-61.0938	-60.9688	-60.8125	-61.0625	-60.4062	-61.0312	-62.5312	-62.9375	-61.1562	-61	-61.375	-61.5625	-61	-61.8125	-61.9688	-61.9688	-62.3125	-62.6562	-62.5938	-62.75	-62.8438	-62.8125	-63.4062	-64.25	-64.3438	-64.5625	-64.2812	-64.5
		-0.04	0.3	-60.9688	-61	-60.8125	-60.7188	-60.9688	-60.1875	-60.9375	-62.4375	-62.8125	-61.0625	-60.8125	-61.3438	-61.4062	-61.0312	-61.75	-61.8438	-61.9688	-62.1875	-62.5312	-62.5	-62.6875	-62.6875	-62.6875	-63.2812	-64.0625	-64.2812	-64.4375	-64.0312	-64.4062
		-0.04	0.32	-60.875	-60.9375	-60.75	-60.5625	-60.875	-60.1562	-60.875	-62.3438	-62.7812	-61	-60.8125	-61.2812	-61.4375	-60.8125	-61.6562	-61.7812	-61.8438	-62.0938	-62.4375	-62.375	-62.5	-62.6562	-62.6562	-63.25	-64.0312	-64.1562	-64.4062	-64.0625	-64.4062
		-0.04	0.34	-60.8125	-60.875	-60.6562	-60.5312	-60.8125	-60.1562	-60.8438	-62.25	-62.625	-60.875	-60.7812	-61.125	-61.25	-60.75	-61.5938	-61.625	-61.7188	-61.8438	-62.3125	-62.375	-62.4688	-62.6562	-62.625	-63.0938	-64.0312	-64.0938	-64.2812	-64.0312	-64.1875
		-0.04	0.36	-60.6562	-60.7812	-60.5625	-60.5312	-60.7812	-60.0625	-60.75	-62.2188	-62.5	-60.7188	-60.6875	-61.1562	-61.2812	-60.7812	-61.5	-61.5	-61.6562	-61.8438	-62.3125	-62.4062	-62.4375	-62.5938	-62.5312	-63.0938	-63.875	-64.0938	-64.1875	-63.9688	-64.1562
		-0.04	0.38	-60.625	-60.75	-60.5625	-60.4062	-60.7188	-60.0312	-60.6875	-62.0625	-62.5	-60.75	-60.5625	-61	-61.0938	-60.7812	-61.4375	-61.4375	-61.7188	-61.7812	-62.2188	-62.1562	-62.375	-62.5312	-62.4688	-63.0625	-63.9062	-64.0312	-64.125	-63.9688	-64.125
		-0.04	0.4	-60.5938	-60.6562	-60.5625	-60.3125	-60.75	-60	-60.6562	-62.0625	-62.5	-60.7812	-60.5312	-60.9375	-61.0312	-60.7812	-61.4062	-61.4688	-61.5312	-61.7188	-62.1562	-62.125	-62.2812	-62.4688	-62.4688	-63	-63.7812	-63.9375	-64.1562	-63.9375	-64.0625
		-0.04	0.42	-60.5312	-60.5625	-60.5	-60.3125	-60.6562	-59.9688	-60.5938	-62.0625	-62.5312	-60.6562	-60.5625	-60.9688	-61.1562	-60.6562	-61.3125	-61.3125	-61.5	-61.75	-62.1562	-62.1562	-62.2188	-62.4375	-62.4062	-63	-63.6875	-63.9375	-64.125	-63.8125	-64.0625
		-0.04	0.44	-60.4688	-60.5312	-60.5625	-60.25	-60.625	-59.875	-60.625	-62.0938	-62.4062	-60.5938	-60.5	-60.9375	-61.0938	-60.625	-61.3438	-61.3125	-61.5	-61.7188	-62.1875	-62.125	-62.25	-62.4375	-62.375	-63	-63.7812	-63.8438	-64.0938	-63.7188	-64.0312
		-0.04	0.46	-60.5312	-60.5312	-60.5	-60.1562	-60.5938	-59.9375	-60.5938	-61.9375	-62.375	-60.625	-60.4688	-60.8125	-61	-60.5938	-61.2812	-61.2188	-61.4062	-61.6562	-62.0625	-62.0938	-62.25	-62.2812	-62.4062	-62.9375	-63.75	-63.8125	-64.0625	-63.7812	-64.0312
		-0.04	0.48	-60.4688	-60.5	-60.4375	-60.2812	-60.5312	-60	-60.5	-62	-62.5	-60.75	-60.4062	-60.875	-61.0625	-60.5	-61.3438	-61.1562	-61.4375	-61.6562	-61.9688	-62	-62.2812	-62.375	-62.3125	-63	-63.6875	-63.875	-64.0312	-63.8125	-64.0312
		-0.04	0.5	-60.4062	-60.4375	-60.4375	-60.1562	-60.4688	-59.875	-60.5312	-61.9062	-62.375	-60.5312	-60.5	-60.8438	-61.0312	-60.5	-61.2188	-61.1875	-61.4062	-61.6562	-61.9688	-61.9375	-62.25	-62.2812	-62.4062	-62.9375	-63.7188	-63.7812	-64.0312	-63.6875	-63.9688
		-0.04	0.52	-60.4062	-60.4062	-60.5	-60.1875	-60.5312	-59.9062	-60.5938	-61.9062	-62.2812	-60.5625	-60.3125	-60.7812	-60.9688	-60.5312	-61.2812	-61.1562	-61.3438	-61.625	-62	-62	-62.1562	-62.2812	-62.3125	-62.8438	-63.6562	-63.75	-64.0312	-63.75	-64.0312
		-0.04	0.54	-60.4062	-60.4062	-60.4062	-60.2812	-60.5	-59.9375	-60.625	-61.9062	-62.3438	-60.4688	-60.3125	-60.8125	-61	-60.4062	-61.25	-61.2188	-61.3438	-61.5	-61.9375	-62	-62.1875	-62.4062	-62.3125	-62.7812	-63.625	-63.6875	-64.0312	-63.7188	-64.0312
		-0.04	0.56	-60.375	-60.2812	-60.375	-60.25	-60.4688	-59.9062	-60.6562	-61.9062	-62.25	-60.5312	-60.4375	-60.8438	-61.0312	-60.4688	-61.2188	-61.1562	-61.3438	-61.5938	-61.9375	-61.9375	-62.2188	-62.2812	-62.3125	-62.7812	-63.6875	-63.5625	-63.9375	-63.7188	-63.875
		-0.04	0.58	-60.3438	-60.2188	-60.4062	-60.125	-60.5	-59.8438	-60.625	-61.8438	-62.25	-60.625	-60.375	-60.8125	-60.9375	-60.4688	-61.1562	-61.1875	-61.3125	-61.5312	-61.9375	-62.0312	-62.1562	-62.25	-62.3125	-62.7812	-63.5625	-63.6562	-63.9375	-63.6875	-63.9375
		-0.04	0.6	-60.4062	-60.2188	-60.3125	-60.1562	-60.5	-59.9062	-60.5625	-61.8125	-62.2812	-60.5312	-60.3125	-60.7812	-60.9062	-60.5	-61.125	-61.2188	-61.4375	-61.5312	-61.875	-61.9688	-62.0312	-62.3438	-62.2188	-62.7188	-63.5625	-63.6562	-63.9375	-63.75	-63.8438
		-0.04	0.62	-60.4375	-60.125	-60.2812	-60.1562	-60.4375	-59.8125	-60.5	-61.9062	-62.25	-60.5312	-60.4688	-60.7188	-60.9688	-60.375	-61.0625	-61.0625	-61.3438	-61.5625	-61.875	-61.9688	-62.1875	-62.375	-62.2188	-62.75	-63.5938	-63.6562	-63.9375	-63.5625	-63.875
		-0.04	0.64	-60.4375	-60.125	-60.3125	-60.1562	-60.4688	-59.8438	-60.5	-61.9062	-62.2812	-60.5938	-60.3438	-60.6562	-60.9688	-60.4688	-61.1562	-61.125	-61.25	-61.4688	-61.9375	-62.0312	-62.0625	-62.2188	-62.1562	-62.7188	-63.5312	-63.75	-63.9062	-63.7812	-63.9062
		-0.04	0.66	-60.4062	-60.2188	-60.3438	-60.0625	-60.4688	-59.8125	-60.5625	-61.8125	-62.2188	-60.4688	-60.3438	-60.6562	-60.875	-60.4062	-61.125	-61.0625	-61.2812	-61.5	-61.875	-61.9688	-62.0312	-62.25	-62.1875	-62.6562	-63.5938	-63.7188	-64.0312	-63.7188	-63.875
		-0.04	0.68	-60.3438	-60.1875	-60.2188	-60.0938	-60.4375	-59.875	-60.5312	-61.8125	-62.2812	-60.5	-60.25	-60.75	-60.8438	-60.4688	-61.0938	-61	-61.25	-61.4688	-61.875	-61.875	-62.0938	-62.2812	-62.1875	-62.7188	-63.5938	-63.6562	-63.875	-63.625	-63.9062
		-0.04	0.7	-60.4062	-60.0312	-60.2812	-60.2188	-60.4375	-59.8438	-60.5312	-61.9062	-62.3125	-60.5	-60.375	-60.7188	-60.9688	-60.4375	-61.0625	-61.0312	-61.3125	-61.5312	-61.8438	-61.875	-61.9688	-62.2812	-62.1562	-62.75	-63.5938	-63.7812	-63.875	-63.6562	-63.875
		-0.04	0.72	-60.5	-60.0625	-60.3125	-60.0625	-60.4688	-59.8438	-60.5312	-61.8125	-62.2188	-60.4062	-60.25	-60.7188	-60.7812	-60.4375	-61.2188	-61.0625	-61.3438	-61.4688	-61.9062	-61.875	-62.0625	-62.25	-62.1562	-62.7188	-63.5	-63.6562	-63.875	-63.6562	-63.8125
		-0.04	0.74	-60.4062	-60.0625	-60.25	-60.0625	-60.4062	-59.7812	-60.5	-61.8438	-62.2812	-60.4375	-60.25	-60.6875	-60.8438	-60.4688	-61.1562	-61	-61.2188	-61.4688	-61.875	-61.9375	-62.0312	-62.1875	-62.1562	-62.75	-63.5	-63.625	-63.7812	-63.5938	-63.7812
		-0.04	0.76	-60.4062	-60.0625	-60.1875	-60.0625	-60.4062	-59.6562	-60.5	-61.7188	-62.2188	-60.4375	-60.2812	-60.6875	-60.875	-60.4062	-61.125	-61.0625	-61.3438	-61.5	-61.8438	-61.7812	-61.9375	-62.1562	-62.1875	-62.7812	-63.4688	-63.5938	-63.6875	-63.5625	-63.8125
		-0.04	0.78	-60.4688	-60.1562	-60.2812	-60	-60.4688	-59.8125	-60.5312	-61.7812	-62.2188	-60.4062	-60.3125	-60.6875	-60.8125	-60.5	-61.0625	-61.0938	-61.3438	-61.4375	-61.7812	-61.875	-61.9375	-62.2812	-62.1562	-62.5938	-63.5	-63.5312	-63.5	-63.6562	-63.75
		-0.04	0.8	-60.4062	-60.0625	-60.1875	-60	-60.3438	-59.7188	-60.5625	-61.75	-62.25	-60.4062	-60.2188	-60.5	-60.8438	-60.4375	-61.125	-61	-61.1875	-61.4062	-61.8438	-61.9688	-62	-62.2188	-62.0938	-62.5312	-63.4375	-63.5625	-63.4688	-63.6562	-63.6562
		-0.04	0.82	-60.2812	-59.9062	-60.1562	-60.0938	-60.2812	-59.5938	-60.5	-61.75	-62.2188	-60.4062	-60.1875	-60.5938	-60.9062	-60.4062	-61.125	-60.9688	-61.1562	-61.4062	-61.6562	-61.7812	-61.875	-62.1562	-62.0625	-62.5312	-63.4062	-63.5	-63.3438	-63.5938	-63.625
		-0.04	0.84	-60.1875	-59.9375	-60.125	-60.0625	-60.0625	-59.5938	-60.4375	-61.625	-62.0625	-60.25	-60.25	-60.5312	-60.7812	-60.4688	-61.0938	-60.9688	-61.25	-61.375	-61.7188	-61.8438	-61.7812	-62.1562	-62.0625	-62.2812	-63.3438	-63.375	-63.0938	-63.5938	-63.5312
		-0.04	0.86	-60.2188	-59.875	-60	-59.9688	-60.125	-59.5	-60.375	-61.5	-62	-60.0938	-60.125	-60.5	-60.8125	-60.3438	-60.9688	-60.9688	-61.1875	-61.1562	-61.5938	-61.7812	-61.6875	-62.25	-61.9375	-62.1562	-63.1562	-63.3125	-62.9688	-63.625	-63.375
		-0.04	0.88	-60.1875	-59.6875	-59.7812	-60	-59.8125	-59.375	-60.3125	-61.4688	-61.8125	-60.0312	-60.0625	-60.4062	-60.8125	-60.3125	-60.9375	-60.9375	-61.2812	-61.2188	-61.5625	-61.5	-61.5938	-62.0312	-61.9688	-62.0938	-63	-63.3125	-62.8438	-63.4688	-63.2812
		-0.04	0.9	-60.0312	-59.5625	-59.625	-59.9375	-59.6875	-59.25	-60.1562	-61.2812	-61.5625	-59.9062	-60.0938	-60.2188	-60.8438	-60.1562	-60.7812	-60.8438	-61.2812	-61.0938	-61.4688	-61.5	-61.4375	-61.8438	-61.9062	-61.9375	-62.8125	-63.2188	-62.6875	-63.3438	-63.1875
		-0.04	0.92	-59.8125	-59.4688	-59.4062	-59.8438	-59.5312	-59.0312	-60	-61.1562	-61.375	-59.6562	-60	-60	-60.75	-60.1562	-60.9062	-60.8125	-61.125	-60.9688	-61.3438	-61.375	-61.375	-61.7188	-61.7812	-61.625	-62.625	-63.2188	-62.4688	-63.1875	-62.9375
		-0.04	0.94	-59.5938	-59.2812	-59.25	-59.6875	-59.3438	-58.75	-59.8125	-60.875	-61.0625	-59.5625	-59.875	-60	-60.7188	-60.0312	-60.6562	-60.75	-61.0625	-60.75	-61.4062	-61.1562	-61.2188	-61.3438	-61.7812	-61.5	-62.375	-63.0625	-62.25	-63.1562	-62.75
		-0.04	0.96	-59.2812	-59.0625	-58.9688	-59.4688	-59.0625	-58.625	-59.5312	-60.5	-60.8438	-59.4688	-59.75	-59.8125	-60.5938	-59.8438	-60.5938	-60.4688	-61	-60.5625	-61.125	-60.9688	-61	-61.0938	-61.5312	-61.2188	-62.1875	-63	-62.125	-62.9688	-62.5
		-0.04	0.98	-58.9688	-58.8438	-58.6875	-59.2188	-58.9375	-58.3438	-59.3438	-60.2188	-60.5312	-59.125	-59.6562	-59.6562	-60.5312	-59.6562	-60.5	-60.4375	-60.875	-60.375	-61.0312	-60.75	-60.7812	-60.875	-61.3438	-60.9688	-61.9375	-62.8438	-62.0312	-62.8125	-62.25
		-0.04	1	-58.625	-58.6562	-58.375	-58.8438	-58.8438	-58.1562	-59.1875	-59.9375	-60.2188	-59.0312	-59.5	-59.5625	-60.5312	-59.625	-60.2812	-60.375	-60.75	-59.9688	-61	-60.4062	-60.5	-60.4688	-61.0938	-60.5	-61.4688	-62.625	-61.7188	-62.625	-61.9375
		-0.04	1.02	-58.2188	-58.4062	-57.9688	-58.8125	-58.75	-57.9688	-58.9688	-59.5625	-60.0625	-58.9688	-59.5938	-59.4062	-60.3125	-59.5625	-60.2812	-60.2188	-60.7188	-59.7812	-60.7812	-60.1562	-60.0625	-60.2188	-60.7812	-60.1562	-61.1875	-62.5	-61.5	-62.25	-61.5312
		-0.04	1.04	-57.5312	-58.2188	-57.5938	-58.4688	-58.5625	-57.8125	-58.7812	-59.0312	-59.8438	-58.7188	-59.375	-59.3125	-60.1562	-59.3438	-60.125	-60.0938	-60.4688	-59.3438	-60.6562	-59.8125	-59.6875	-59.7812	-60.1562	-59.6875	-60.7188	-62.1562	-61.375	-61.9688	-60.9375
		-0.04	1.06	-57	-57.9062	-56.875	-57.9375	-58.3438	-57.5625	-58.5	-58.5	-59.5312	-58.5312	-59.0625	-59.0938	-60.1562	-59.2812	-59.9375	-59.8438	-60.1562	-58.75	-60.5312	-59.4062	-59.0938	-59.3125	-59.5	-59	-60.25	-61.8125	-61	-61.4688	-60.4062
		-0.04	1.08	-56.2812	-57.5	-56.1562	-57.3438	-57.9375	-57.2812	-58.0938	-57.75	-59.2188	-58.3125	-58.75	-58.8125	-59.8438	-58.9062	-59.8438	-59.6875	-59.8125	-58.2812	-60.3438	-59	-58.375	-58.6562	-58.7188	-58.5625	-59.5625	-61.375	-60.7812	-60.8125	-59.6562
		-0.04	1.1	-55.4375	-57.0312	-55.3125	-56.625	-57.3125	-56.9375	-57.7188	-56.75	-58.875	-57.6875	-58.0625	-58.4375	-59.5	-58.4375	-59.4688	-59.4375	-59.3438	-57.6562	-60.125	-58.5312	-57.6562	-58.1875	-57.875	-57.9062	-58.7812	-60.9375	-60.4375	-60.0938	-58.9688
		-0.04	1.12	-54.5	-56.3438	-54.4688	-55.6562	-56.6875	-56.6562	-57.5	-55.5938	-58.4062	-57.0312	-57.5312	-58.0312	-59.125	-57.7812	-59.1562	-59.0938	-58.4062	-56.7812	-59.8125	-57.9375	-56.875	-57.5312	-56.9062	-57.0625	-58	-60.4062	-60.0625	-59.4688	-58.1562
		-0.04	1.14	-53.625	-55.6562	-53.4688	-54.625	-55.9375	-56.3438	-57.0625	-54.5312	-57.875	-56.2188	-56.9375	-57.5312	-58.625	-57	-58.7812	-58.6562	-57.6562	-55.9062	-59.3438	-57.4062	-55.875	-56.75	-55.9062	-56.2812	-57.125	-59.9062	-59.6875	-58.5312	-57.1562
		-0.04	1.16	-52.6562	-55.0938	-52.5625	-53.625	-54.9688	-55.7812	-56.5625	-53.3438	-57.375	-55.2812	-56.25	-57.0625	-58.1562	-56.2188	-58.125	-58.1562	-56.6562	-55.0625	-58.8125	-56.625	-54.9375	-56.0312	-54.9062	-55.4688	-56.1875	-59.2812	-59.3438	-57.625	-56.3125
		-0.04	1.18	-51.5312	-54.375	-51.4688	-52.5	-54.2188	-55.375	-56.0938	-51.9375	-56.6875	-54.2812	-55.6562	-56.5938	-57.625	-55.25	-57.5938	-57.5938	-55.5312	-54.125	-58.2812	-55.8438	-54.0625	-55.2188	-53.875	-54.5625	-55.4688	-58.6875	-58.8438	-56.8438	-55.4062
		-0.04	1.2	-50.5312	-53.6562	-50.2812	-51.2188	-53.4062	-54.875	-55.5	-50.7812	-56.0312	-53.25	-55	-55.9375	-57	-54.4688	-56.9688	-56.875	-54.5938	-53	-57.6875	-55.2188	-53.0312	-54.1875	-52.9062	-53.6562	-54.7812	-58.25	-58.1875	-56.125	-54.4375
		-0.04	1.22	-49.5938	-53.0625	-49.2188	-50.1875	-52.5938	-54.25	-54.8125	-49.5	-55.25	-52.2812	-54.4375	-55.375	-56.2812	-53.6875	-56.2188	-56.1875	-53.5	-52.1875	-57	-54.3125	-52.0938	-53.375	-52.0312	-52.7812	-54.0938	-57.5938	-57.5312	-55.3438	-53.5938
		-0.04	1.24	-48.4688	-52.4688	-48.1562	-49.1562	-52	-53.9062	-54	-48.3438	-54.625	-51.25	-53.8438	-54.875	-55.5625	-52.8125	-55.5938	-55.5938	-52.5	-51.2188	-56.3438	-53.6875	-51.1875	-52.4688	-51.0938	-51.8125	-53.4688	-57.1875	-56.9688	-54.6875	-52.7812
		-0.04	1.26	-47.5	-51.875	-46.9688	-48.0938	-51.4375	-53.3438	-53.1875	-47.1875	-54	-50.25	-53.4375	-54.1875	-55.125	-52.0938	-55.0312	-54.8438	-51.5625	-50.1875	-55.6562	-53.1562	-50.3438	-51.625	-50.3125	-50.8438	-52.9375	-56.7188	-56.0938	-53.875	-52.0938
		-0.04	1.28	-46.5625	-51.375	-45.8125	-47.0312	-50.9375	-52.9375	-52.4375	-45.9375	-53.4688	-49.4062	-52.875	-53.7188	-54.375	-51.5625	-54.4375	-54.25	-50.6875	-49.3438	-55.0312	-52.5312	-49.375	-50.9062	-49.625	-50.1562	-52.4688	-56.1562	-55.3125	-53.1875	-51.4688
		-0.04	1.3	-45.2188	-50.9688	-44.3438	-46	-50.5	-52.5312	-51.6562	-43.7812	-53.0312	-48.5312	-52.5312	-53.2188	-53.875	-51.0312	-53.875	-53.7812	-49.9062	-48.3438	-54.2812	-52.0938	-48.7188	-50.3438	-48.9062	-49.4375	-52.1875	-55.6875	-54.7188	-52.5312	-50.8438
		-0.04	1.32	-42.8438	-50.5	-41.875	-44.375	-50.1562	-52.0312	-50.9688	-40.5312	-52.7188	-47.7188	-52.2188	-52.6562	-53.4062	-50.5	-53.5312	-53.3438	-49.0625	-47	-53.9062	-51.6562	-47.9062	-49.75	-48.2188	-48.75	-51.7188	-55.125	-54.0938	-51.9062	-50.3125
		-0.04	1.34	-39.4062	-50.0625	-38.0312	-41.6562	-49.9375	-51.6875	-50.3438	-35.9375	-52.3125	-46.7812	-51.75	-52.25	-52.9375	-50.1875	-53.1875	-52.8125	-48.0625	-44.625	-53.2188	-51.3438	-47.0938	-49.2812	-47.625	-48.1875	-51.4688	-54.7812	-53.5312	-51.5	-49.875
		-0.04	1.36	-34.5625	-49.875	-32.7812	-37.7188	-49.6875	-51.4688	-49.5938	-29.5	-52.0625	-45.0625	-51.5	-51.7812	-52.5312	-49.7812	-52.8125	-52.4688	-46.375	-41.1875	-52.7188	-51.0938	-46.125	-48.9375	-47	-47.6562	-51.2812	-54.4688	-53.1562	-50.9062	-49.2188
		-0.04	1.38	-27.9062	-49.4688	-25.6562	-32.1875	-49.5	-51.0938	-49.0625	-21.0625	-51.8125	-42.3438	-51.2188	-51.4688	-52.2188	-49.5	-52.4688	-52.0938	-43.625	-36.3438	-52.2188	-50.9688	-44.4062	-48.625	-46.1562	-47.125	-51	-54.1562	-52.9062	-50.5938	-48.4375
		-0.04	1.4	-19.125	-49.1875	-16.4688	-24.6562	-49.4375	-50.9062	-48.6562	-11.2188	-51.5312	-38.375	-50.9688	-51.25	-51.9062	-49.2812	-52.2812	-51.8125	-39.6562	-29.5938	-51.7812	-50.75	-41.3438	-48.3438	-44.8125	-46.4062	-50.8125	-53.8125	-52.6562	-50.25	-46.6562
		-0.04	1.42	-9.28125	-48.9688	-6.53125	-15.1562	-49.3125	-50.6875	-48.25	-1.8125	-51.4688	-32.9375	-50.8125	-51	-51.7812	-49.0625	-52.0312	-51.4688	-34.0312	-20.9688	-51.4062	-50.5312	-37.0625	-48.125	-42.1562	-45	-50.7812	-53.625	-52.4062	-49.7812	-43.75
		-0.04	1.44	0.09375	-48.75	2.40625	-5.4375	-49.2812	-50.4062	-47.8125	5.9375	-51.2812	-25.5	-50.5938	-50.7812	-51.6562	-48.8438	-51.9062	-51.1875	-26.6875	-11.5	-51	-50.5	-31.3438	-47.5625	-38.3438	-42.3438	-50.625	-53.4688	-52.3438	-49.2812	-39.75
		-0.04	1.46	7.65625	-48.5312	9.375	3.5	-49.2812	-50.3125	-47.4375	11	-51.1875	-16.4688	-50.375	-50.5625	-51.5312	-48.5938	-51.6875	-51	-17.5625	-2.65625	-50.6875	-50.375	-23.4375	-46.5	-32.9375	-38.375	-50.5938	-53.375	-52.1875	-48.1562	-34.1875
		-0.04	1.48	12.3438	-48.3125	13.2812	10.0312	-49.25	-50.125	-47.0312	12.875	-51.0625	-6.9375	-50.3125	-50.4688	-51.3438	-48.4688	-51.4688	-50.8125	-8.1875	4.09375	-50.4375	-50.3438	-13.625	-44.4062	-25.625	-33	-50.625	-53.2812	-52.0625	-45.875	-26.7812
		-0.04	1.5	13.9062	-48.1562	13.875	13.5	-49.125	-49.9062	-46.2188	11.6562	-51	1.5625	-50.1875	-50.375	-51.3438	-48.375	-51.375	-50.75	0.0625	8.25	-50.1875	-50.3438	-3.6875	-41.0625	-16.2812	-25.6875	-50.5625	-53.2188	-52	-42.5312	-17.5938
		-0.04	1.52	12.375	-48.0625	11.4375	13.75	-49.1875	-49.8125	-44.5938	7.8125	-50.8438	7.84375	-50.0938	-50.3438	-51.4062	-48.0312	-51.2188	-50.5312	6.09375	9.375	-50.0312	-50.375	4.875	-36.3438	-6.21875	-16.1562	-50.5	-53.2188	-52.0312	-37.9688	-7.90625
		-0.04	1.54	8.21875	-48	6.78125	11.0312	-49.125	-49.7188	-41.9062	2.21875	-50.9062	11.4375	-50.0938	-50.2188	-51.2812	-47.7188	-51.0312	-50.4688	9.25	7.6875	-49.875	-50.3438	10.875	-30.2812	2.8125	-6.03125	-50.625	-53.1875	-52.0312	-31.875	0.75
		-0.04	1.56	2.25	-47.9062	0.53125	6.0625	-49.1562	-49.7188	-37.8125	-4.53125	-50.8125	11.7188	-50.0312	-50.25	-51.375	-46.9062	-50.9688	-50.5312	9.375	3.8125	-49.875	-50.5	13.625	-21.9688	9.625	3	-50.5625	-53.2188	-52.0625	-23.625	7
		-0.04	1.58	-4.8125	-47.8438	-6.78125	-0.5	-49.1875	-49.6875	-32.375	-11.9688	-50.7812	9.375	-50.0938	-50.2812	-51.4375	-44.9375	-50.8125	-50.4688	6.84375	-1.625	-49.6562	-50.4375	13.25	-12.1562	13.3438	9.8125	-50.6875	-53.1562	-52.1875	-14.0625	10.3438
		-0.04	1.6	-12.4062	-47.75	-14.5312	-7.875	-49.2812	-49.625	-25.1562	-19.5	-50.7188	4.71875	-50.125	-50.2812	-51.4375	-42.0625	-50.6875	-50.4688	2.5	-8.09375	-49.7188	-50.5	10.0625	-2.40625	13.6875	13.5312	-50.75	-53.2812	-52.25	-4.6875	10.5625
		-0.04	1.62	-19.9688	-47.9062	-21.9688	-15.6562	-49.3125	-49.6875	-16.0312	-26.5312	-50.8125	-1.28125	-50.2188	-50.3125	-51.5	-37.8438	-50.5312	-50.4375	-3.34375	-15.0938	-49.5625	-50.75	4.8125	5.6875	11.0312	13.8125	-50.8125	-53.3438	-52.3438	3.1875	8.125
		-0.04	1.64	-27.25	-47.8125	-28.9688	-23.25	-49.375	-49.7812	-6.1875	-32.9062	-50.8438	-8.3125	-50.3125	-50.375	-51.5625	-32.2188	-50.5625	-50.5312	-10	-22.0312	-49.375	-50.8125	-1.875	11.25	6.28125	11.1875	-50.8438	-53.4688	-52.5	8.5	3.5625
		-0.04	1.66	-33.625	-47.7812	-35.2188	-30.1875	-49.5	-49.625	2.6875	-38.5312	-51	-15.5625	-50.4375	-50.4688	-51.6562	-24.875	-50.4688	-50.4375	-16.9375	-28.4375	-49.2812	-50.875	-9.25	13.5	-0.09375	6.28125	-51	-53.5	-52.5938	10.6875	-2.59375
		-0.04	1.68	-39.2812	-47.875	-40.625	-36.1875	-49.625	-49.7188	9.34375	-43.2188	-51	-22.7188	-50.4688	-50.4688	-51.8125	-15.75	-50.3438	-50.4688	-23.6875	-34.25	-49.25	-51.0938	-16.9375	12.6875	-7.40625	-0.21875	-51.0625	-53.5625	-52.625	9.90625	-9.5
		-0.04	1.7	-44.0625	-47.9375	-45.0312	-41.4375	-49.7188	-49.7812	13.25	-47.1562	-51.0938	-29.25	-50.6562	-50.5625	-51.9062	-6.34375	-50.4062	-50.5938	-30.0625	-39.375	-49.2188	-51.3125	-24.2812	9.15625	-14.9688	-7.59375	-51.25	-53.75	-52.7812	6.6875	-16.7188
		-0.04	1.72	-47.9688	-47.9375	-48.75	-45.8438	-49.7188	-49.9375	13.875	-50.4375	-51.1875	-35.1562	-50.6875	-50.6562	-51.9062	2	-50.4375	-50.6562	-35.5625	-43.6562	-49.2812	-51.4062	-30.9375	3.625	-22.4688	-15.2812	-51.4688	-53.7812	-53	1.4375	-23.8438
		-0.04	1.74	-51.125	-48.0938	-51.75	-49.4062	-50	-50	11.5	-53	-51.3438	-40.3125	-50.8125	-50.75	-52.0938	8.09375	-50.4375	-50.5938	-40.5625	-47.375	-49.1562	-51.5625	-36.6875	-3.125	-29.2812	-22.8125	-51.5	-53.9062	-53.0938	-5.0625	-30.4375
		-0.04	1.76	-53.7188	-48.3125	-54.1562	-52.3438	-50.125	-50.0938	6.71875	-55.0938	-51.4375	-44.5312	-51.0312	-50.9062	-52.25	11.4375	-50.4375	-50.5938	-44.6875	-50.4375	-49.1875	-51.6562	-41.6875	-10.625	-35.4062	-29.7812	-51.7188	-53.9375	-53.0625	-12.125	-36.2812
		-0.04	1.78	-55.8438	-48.3438	-56.1875	-54.7188	-50.3125	-50.1875	0.5	-56.8438	-51.5938	-48.2188	-51.0625	-51	-52.4688	11.5312	-50.5	-50.7812	-48.2188	-52.9062	-49.25	-51.7812	-45.9375	-18.1562	-40.7188	-35.75	-51.875	-54.0625	-53.2812	-19.4375	-41.25
		-0.04	1.8	-57.5	-48.375	-57.75	-56.5312	-50.375	-50.3438	-6.84375	-58.2812	-51.6562	-51.1562	-51.2812	-51.2812	-52.5312	9.125	-50.5938	-50.7188	-51.0625	-54.75	-49.1562	-51.9375	-49.3438	-25.4062	-45.0312	-40.9375	-52	-54.1562	-53.3438	-26.4375	-45.5312
		-0.04	1.82	-58.75	-48.5625	-58.9375	-58.0625	-50.5625	-50.4062	-14.4688	-59.2812	-51.7812	-53.4375	-51.5	-51.3438	-52.5938	4.65625	-50.625	-50.7812	-53.4688	-56.4688	-49.1875	-52.0938	-52.1562	-31.9688	-48.5	-45.3438	-52.1562	-54.1875	-53.4375	-32.7812	-49.0938
		-0.04	1.84	-59.8438	-48.6562	-59.7812	-59.2188	-50.625	-50.5312	-22	-60.0938	-52.0312	-55.5	-51.5312	-51.375	-52.75	-1.375	-50.75	-50.9062	-55.3125	-57.7812	-49.3438	-52.2812	-54.5	-37.5938	-51.4688	-48.9375	-52.375	-54.2812	-53.4375	-38.3438	-52
		-0.04	1.86	-60.6562	-48.8438	-60.625	-60.1875	-50.875	-50.6875	-28.9062	-60.7812	-52.125	-57.0625	-51.6875	-51.5938	-52.75	-8.21875	-50.7812	-50.9688	-56.7812	-58.7188	-49.2812	-52.5	-56.1875	-42.5	-53.875	-51.7812	-52.4688	-54.4375	-53.5938	-43.1562	-54.4062
		-0.04	1.88	-61.2188	-48.9688	-61.0938	-60.875	-50.9375	-50.7812	-35.0625	-61.3438	-52.1562	-58.3438	-51.9062	-51.625	-52.9688	-15.5	-50.9375	-50.9062	-58.0938	-59.5625	-49.3438	-52.625	-57.5625	-46.5	-55.75	-54.1875	-52.625	-54.4062	-53.5625	-47.1875	-56.4688
		-0.04	1.9	-61.5938	-49.0625	-61.4688	-61.4062	-51.0312	-50.8125	-40.4375	-61.5625	-52.25	-59.2188	-51.9688	-51.8125	-53.0938	-22.6875	-51.0312	-51	-59	-60.1875	-49.4375	-52.8125	-58.8438	-49.7188	-57.3125	-56.125	-52.875	-54.5312	-53.8125	-50.5	-57.9375
		-0.04	1.92	-61.9688	-49.125	-61.7188	-61.9062	-51.1562	-51	-44.8438	-61.9062	-52.4062	-60	-52.1875	-51.9062	-53.0312	-29.1562	-51.0625	-51.0938	-59.8125	-60.6875	-49.5312	-52.9375	-59.5938	-52.5	-58.5	-57.5312	-52.9062	-54.6562	-53.9062	-53.3438	-59.2188
		-0.04	1.94	-62.1562	-49.3438	-61.9062	-62.2188	-51.3438	-50.9688	-48.5	-62.125	-52.4375	-60.5312	-52.2812	-52.1562	-53.1875	-34.9688	-51.125	-51.0625	-60.4062	-61.0312	-49.7188	-53.125	-60.3125	-54.6562	-59.4688	-58.7188	-53.125	-54.7812	-53.9688	-55.625	-60.2812
		-0.04	1.96	-62.2188	-49.5	-62	-62.3438	-51.4688	-51.125	-51.625	-62.1562	-52.5938	-60.9688	-52.4062	-52.1875	-53.2812	-40.0312	-51.3438	-51.0938	-60.9375	-61.375	-49.8125	-53.2812	-60.875	-56.4375	-60.1875	-59.6562	-53.4062	-54.9375	-54.0938	-57.5	-61.0625
		-0.04	1.98	-62.2812	-49.6875	-62.0938	-62.5312	-51.5	-51.1562	-54	-62.2812	-52.7188	-61.375	-52.6875	-52.3125	-53.2188	-44.1875	-51.4375	-51.1875	-61.1562	-61.5938	-49.875	-53.5312	-61.25	-57.7812	-60.7812	-60.4688	-53.4062	-55.0625	-54.2188	-58.9375	-61.625
		-0.04	2	-62.2812	-49.6875	-62.2188	-62.6562	-51.6562	-51.1562	-55.7812	-62.2812	-52.7812	-61.5625	-52.7812	-52.375	-53.3125	-47.75	-51.5312	-51.25	-61.5	-61.5625	-50.1562	-53.625	-61.5	-58.9375	-61.2188	-60.9062	-53.625	-55.1875	-54.3438	-60.125	-62.0938
		-0.04	2.02	-62.25	-49.8125	-62.125	-62.6562	-51.8125	-51.1875	-57.4375	-62.2812	-52.9062	-61.7188	-52.9375	-52.4062	-53.4062	-50.6875	-51.6875	-51.2812	-61.7188	-61.6875	-50.2812	-53.8125	-61.8125	-59.7188	-61.5938	-61.3438	-53.8438	-55.3438	-54.5	-61.1562	-62.4375
		-0.04	2.04	-62.1875	-49.875	-62.0938	-62.7188	-51.9062	-51.1875	-58.6875	-62.1562	-52.9375	-61.7188	-53.125	-52.5	-53.3125	-53	-51.7812	-51.375	-61.875	-61.8438	-50.4062	-54	-61.9688	-60.4375	-61.7812	-61.6875	-53.8438	-55.5	-54.7188	-61.8438	-62.6875
		-0.04	2.06	-62.1562	-50	-62.0938	-62.7188	-52.0312	-51.25	-59.5938	-62.125	-53.0625	-61.8125	-53.0938	-52.625	-53.2812	-54.9688	-51.875	-51.5938	-61.9688	-61.9062	-50.5625	-54.1875	-62.0312	-60.9375	-61.9688	-61.8438	-54.0938	-55.5	-54.7188	-62.4688	-62.8438
		-0.04	2.08	-62	-50	-62.125	-62.6562	-52.1562	-51.375	-60.4062	-62.0625	-53.125	-61.75	-53.3438	-52.5938	-53.4062	-56.375	-52.0312	-51.625	-62.0312	-61.8438	-50.7188	-54.25	-62.1562	-61.375	-62.1562	-61.9062	-54.2188	-55.7188	-54.875	-62.9062	-63.0625
		-0.04	2.1	-61.9375	-50.1875	-61.9062	-62.625	-52.3125	-51.375	-61	-62.0625	-53.1562	-61.6875	-53.5	-52.7812	-53.3125	-57.5625	-52.1875	-51.7812	-62	-61.9062	-50.7812	-54.5312	-62.2188	-61.5	-62.2188	-62.1562	-54.4688	-55.875	-55.0625	-63.3438	-63.2812
		-0.04	2.12	-61.8125	-50.1562	-61.875	-62.6562	-52.375	-51.4688	-61.4375	-62	-53.2812	-61.6875	-53.5625	-52.8438	-53.25	-58.625	-52.2188	-51.875	-62.0938	-61.9375	-50.9688	-54.6562	-62.125	-61.8438	-62.2812	-62.1875	-54.5938	-55.9375	-55.125	-63.4375	-63.2188
		-0.04	2.14	-61.875	-50.25	-61.8438	-62.6875	-52.5	-51.4375	-61.7812	-61.875	-53.375	-61.6562	-53.75	-52.9375	-53.2812	-59.2188	-52.3438	-52.0625	-62.0938	-61.9062	-51	-54.6562	-62.2188	-61.9375	-62.2812	-62.25	-54.7812	-56.1562	-55.375	-63.75	-63.3438
		-0.04	2.16	-61.6875	-50.4375	-61.8125	-62.5312	-52.6562	-51.4688	-62	-61.8125	-53.3438	-61.5	-53.8438	-53.0312	-53.25	-59.8125	-52.5	-52.0625	-62.125	-61.875	-51.3125	-54.875	-62.1875	-62.0312	-62.2812	-62.25	-54.9375	-56.2188	-55.5625	-63.9375	-63.375
		-0.04	2.18	-61.6875	-50.375	-61.6562	-62.5312	-52.75	-51.5	-62.2188	-61.875	-53.4688	-61.5	-53.8438	-53.2188	-53.125	-60.2812	-52.6562	-52.2812	-62.0938	-61.9688	-51.4062	-54.9375	-62.125	-62.1562	-62.3125	-62.2812	-55	-56.3125	-55.6562	-64.0312	-63.4062
		-0.04	2.2	-61.625	-50.375	-61.625	-62.4688	-52.7812	-51.5625	-62.25	-61.7188	-53.5312	-61.4688	-54	-53.1875	-53.1875	-60.6562	-52.6562	-52.4375	-62.1562	-61.9375	-51.5	-55.0938	-62.125	-62.2812	-62.4062	-62.3438	-55.1875	-56.4375	-55.8438	-64.0938	-63.4688
		-0.04	2.22	-61.5625	-50.5312	-61.7812	-62.4375	-52.9375	-51.6562	-62.3125	-61.6875	-53.5938	-61.2812	-54.125	-53.3125	-53.0938	-60.875	-52.8438	-52.4375	-62.0938	-61.9375	-51.8125	-55.25	-62.1562	-62.2188	-62.4062	-62.25	-55.3438	-56.5	-55.9688	-64.1562	-63.4688
		-0.04	2.24	-61.5	-50.5625	-61.7188	-62.4062	-53.1562	-51.6875	-62.5	-61.6875	-53.625	-61.2812	-54.2188	-53.5	-53.0938	-61.0938	-53.0312	-52.5938	-62.0312	-61.9375	-51.9375	-55.25	-62.1562	-62.2188	-62.375	-62.3125	-55.5	-56.5938	-56.0625	-64.2188	-63.4688
		-0.04	2.26	-61.375	-50.6562	-61.5625	-62.375	-53.1562	-51.8125	-62.375	-61.625	-53.8125	-61.2812	-54.3438	-53.5	-53.1562	-61.0625	-53.0938	-52.7812	-62.0938	-62	-52.0312	-55.1875	-62.1562	-62.25	-62.375	-62.3125	-55.7812	-56.8125	-56.2812	-64.2812	-63.4688
		-0.04	2.28	-61.375	-50.8125	-61.5938	-62.3125	-53.4062	-51.8438	-62.2812	-61.6562	-53.8438	-61.1562	-54.375	-53.6562	-53.1562	-61.1562	-53.25	-52.9062	-62	-61.9062	-52.2188	-55.4688	-62.2188	-62.25	-62.25	-62.2188	-55.8438	-56.8438	-56.375	-64.3438	-63.4688
		-0.04	2.3	-61.3438	-50.9062	-61.6562	-62.25	-53.4062	-52.0312	-62.2188	-61.5938	-54	-61.0938	-54.4375	-53.6875	-53.1562	-61.2812	-53.4375	-52.9688	-62	-61.9375	-52.3438	-55.5312	-62.1562	-62.1875	-62.3125	-62.3125	-56	-57	-56.4375	-64.25	-63.5
		-0.04	2.32	-61.2188	-50.8438	-61.5	-62.2812	-53.4688	-52.0312	-62.3125	-61.5938	-54.1562	-61.0938	-54.5625	-53.6875	-53.1875	-61.1875	-53.5312	-53.1875	-62.0312	-62.0938	-52.4688	-55.5312	-62.0938	-62.2188	-62.2188	-62.4375	-56.1875	-57.1875	-56.6562	-64.2812	-63.5938
		-0.04	2.34	-61.2188	-50.9062	-61.5312	-62.25	-53.5312	-52.0938	-62.1562	-61.5938	-54.1562	-61.0312	-54.5625	-53.9375	-53.1875	-61.1875	-53.625	-53.25	-62.0938	-61.9688	-52.5938	-55.8125	-62.1875	-62.2812	-62.2188	-62.4375	-56.2812	-57.1875	-56.7812	-64.3125	-63.5938
		-0.04	2.36	-61.2812	-51	-61.5938	-62.2812	-53.6875	-52.1875	-62.0938	-61.5	-54.2812	-61	-54.7188	-54	-53.2812	-61.125	-53.7188	-53.3125	-61.9375	-61.9375	-52.6562	-55.8125	-62.1875	-62.1562	-62.2812	-62.3438	-56.3438	-57.2188	-56.9688	-64.375	-63.6562
		-0.04	2.38	-61.25	-51.1562	-61.5938	-62.1562	-53.8438	-52.3125	-62.0312	-61.5312	-54.375	-61.0312	-54.8438	-54.125	-53.375	-61.0938	-53.8438	-53.5	-62	-62.0312	-52.9062	-55.9375	-62.1875	-62.1562	-62.3438	-62.3125	-56.5	-57.4062	-57.125	-64.4062	-63.6875
		-0.04	2.4	-61.2812	-51.0312	-61.5938	-62.1562	-53.8438	-52.3438	-61.9375	-61.5312	-54.4375	-61	-54.7812	-54.2188	-53.4062	-61.1562	-53.8438	-53.6875	-62.0938	-62.0625	-53	-56.125	-62.1562	-62.2188	-62.2812	-62.375	-56.625	-57.5	-57.1562	-64.375	-63.6875
		-0.04	2.42	-61.3125	-51.2188	-61.5625	-62.25	-54.0312	-52.5312	-61.9062	-61.4375	-54.5	-61	-54.9062	-54.375	-53.4375	-61.0938	-54.0938	-53.75	-62.125	-62.0938	-53.0938	-56.1875	-62.25	-62.25	-62.3438	-62.4062	-56.6562	-57.625	-57.1875	-64.3438	-63.625
		-0.04	2.44	-61.2812	-51.3438	-61.625	-62.1562	-54.1562	-52.5312	-61.8438	-61.5	-54.6562	-60.9688	-55.0938	-54.25	-53.5312	-61.0938	-54.2188	-53.8438	-62.1562	-62.0938	-53.2812	-56.1562	-62.2812	-62.2812	-62.3125	-62.375	-56.9062	-57.75	-57.3438	-64.4062	-63.8125
		-0.04	2.46	-61.3125	-51.4375	-61.5938	-62.0938	-54.2812	-52.5938	-61.9688	-61.5	-54.7188	-61	-55.2812	-54.5	-53.5938	-61.125	-54.25	-53.9375	-62.2188	-62.2188	-53.3438	-56.3438	-62.2812	-62.3125	-62.3438	-62.4375	-57.0625	-57.8438	-57.4688	-64.375	-63.7812
		-0.04	2.48	-61.375	-51.5312	-61.5312	-62.2188	-54.3438	-52.6875	-61.9062	-61.5	-54.8438	-61.0312	-55.3125	-54.5312	-53.6875	-61	-54.4062	-54.0625	-62.125	-62.1875	-53.5	-56.5	-62.375	-62.375	-62.4375	-62.5	-57.0312	-57.9688	-57.5	-64.4375	-63.8438
		-0.04	2.5	-61.375	-51.6562	-61.6875	-62.2188	-54.4688	-52.625	-61.75	-61.5625	-54.9062	-60.9688	-55.25	-54.5312	-53.7188	-61	-54.5312	-54.125	-62.1875	-62.1562	-53.75	-56.5	-62.4375	-62.2188	-62.4688	-62.4688	-57.1562	-58.0312	-57.7188	-64.4062	-63.9688
		-0.04	2.52	-61.3438	-51.6875	-61.6562	-62.1562	-54.4375	-52.8125	-61.7812	-61.5938	-54.9062	-61	-55.2812	-54.7188	-53.7812	-60.9688	-54.5938	-54.3125	-62.2188	-62.3125	-53.7812	-56.625	-62.2812	-62.375	-62.4688	-62.5	-57.3438	-58.0625	-57.7188	-64.4062	-63.9375
		-0.04	2.54	-61.4062	-51.75	-61.7188	-62.1875	-54.5	-52.8438	-61.8125	-61.6562	-55.0312	-61.0625	-55.5312	-54.75	-53.875	-60.9062	-54.6562	-54.4062	-62.2188	-62.2812	-53.7812	-56.6562	-62.4062	-62.375	-62.5	-62.5312	-57.375	-58.3125	-57.8438	-64.3438	-64.0312
		-0.04	2.56	-61.5	-51.9375	-61.7188	-62.25	-54.6562	-52.9062	-61.7812	-61.625	-55.1562	-61.0312	-55.5625	-54.875	-53.9062	-60.9375	-54.75	-54.5	-62.2812	-62.3125	-54.0312	-56.7812	-62.5312	-62.375	-62.5	-62.5625	-57.5625	-58.3438	-58.0312	-64.5312	-64.0312
		-0.04	2.58	-61.4688	-52	-61.7812	-62.25	-54.7812	-53.0312	-61.75	-61.75	-55.2812	-61.0938	-55.6875	-55	-53.9688	-60.9688	-54.875	-54.5938	-62.3438	-62.4062	-54.0312	-56.9375	-62.5938	-62.375	-62.5	-62.5	-57.6562	-58.4062	-58.0312	-64.5	-64.0312
		-0.04	2.6	-61.5625	-52.0312	-61.7812	-62.25	-54.9062	-53.1562	-61.8125	-61.7188	-55.3438	-61.1562	-55.7188	-55.0625	-54	-60.9062	-54.9688	-54.7812	-62.4062	-62.4688	-54.25	-57	-62.5938	-62.5	-62.625	-62.6562	-57.6875	-58.5312	-58.1875	-64.4062	-64.0312
		-0.04	2.62	-61.5625	-52.25	-61.7812	-62.3125	-54.9062	-53.2188	-61.7188	-61.7812	-55.4375	-61.125	-55.8125	-55.0625	-54.125	-60.9375	-55.0625	-54.7812	-62.4062	-62.5312	-54.375	-57	-62.75	-62.5	-62.625	-62.75	-57.875	-58.5938	-58.25	-64.4688	-64.1562
		-0.04	2.64	-61.625	-52.3125	-61.8438	-62.4062	-55.0312	-53.1875	-61.8125	-61.8438	-55.5	-61.125	-55.875	-55.1562	-54.1875	-61	-55.125	-54.75	-62.5	-62.5312	-54.4375	-57.0312	-62.8125	-62.5938	-62.625	-62.6562	-57.9062	-58.6875	-58.3438	-64.5	-64.1562
		-0.04	2.66	-61.7188	-52.3438	-61.9688	-62.3125	-55.125	-53.375	-61.8125	-61.9375	-55.5625	-61.3125	-55.9688	-55.125	-54.2812	-60.9375	-55.1562	-54.9375	-62.5	-62.625	-54.5938	-57.1562	-62.75	-62.5312	-62.8125	-62.7812	-58	-58.75	-58.5	-64.5	-64.1562
		-0.04	2.68	-61.7188	-52.4688	-61.9688	-62.375	-55.0938	-53.4062	-61.8125	-61.9375	-55.6875	-61.375	-56.0312	-55.2188	-54.375	-61.0312	-55.4062	-55.0312	-62.5	-62.6875	-54.6562	-57.2812	-62.9062	-62.625	-62.75	-62.875	-58.1562	-58.8438	-58.5	-64.5938	-64.1562
		-0.04	2.7	-61.6875	-52.5625	-62	-62.4375	-55.2812	-53.5	-61.75	-61.9688	-55.8125	-61.4062	-56.0938	-55.3438	-54.4062	-60.9375	-55.4375	-55.0312	-62.5938	-62.6562	-54.8125	-57.4062	-62.9688	-62.5	-62.7812	-62.9375	-58.2188	-58.9375	-58.5938	-64.6875	-64.2812
		-0.04	2.72	-61.875	-52.6562	-62.1562	-62.5625	-55.3438	-53.625	-61.8125	-62.0938	-55.8125	-61.4688	-56.2188	-55.5	-54.5312	-61.0625	-55.5	-55.1875	-62.625	-62.75	-54.9375	-57.4375	-62.9688	-62.6562	-62.9375	-62.9375	-58.25	-59.0312	-58.7812	-64.6875	-64.3438
		-0.04	2.74	-61.9062	-52.6562	-62.0625	-62.4688	-55.4688	-53.5938	-61.875	-62.1562	-55.9688	-61.4375	-56.25	-55.5312	-54.625	-60.9688	-55.5625	-55.3125	-62.625	-62.8438	-54.9062	-57.4688	-63.0312	-62.7188	-62.9375	-63	-58.4062	-59.125	-58.7812	-64.6562	-64.4062
		-0.04	2.76	-61.9375	-52.7812	-62.1562	-62.5625	-55.5	-53.7188	-61.8125	-62.0938	-56	-61.5	-56.2812	-55.5938	-54.7188	-60.9688	-55.7188	-55.4062	-62.625	-62.9062	-55	-57.5312	-63.0938	-62.7188	-63	-63.125	-58.5312	-59.1562	-58.875	-64.8438	-64.4375
		-0.04	2.78	-62	-52.9062	-62.2188	-62.625	-55.5312	-53.8438	-61.75	-62.1562	-56.0625	-61.6562	-56.4062	-55.6562	-54.7188	-61.125	-55.7188	-55.375	-62.8125	-62.875	-55.125	-57.5938	-63.2812	-62.7188	-63.1562	-63.0938	-58.5	-59.2188	-58.9375	-64.75	-64.4688
		-0.04	2.8	-62.0938	-52.9688	-62.25	-62.5625	-55.5938	-53.9062	-61.875	-62.3125	-56.2188	-61.6875	-56.5	-55.75	-54.7812	-61.125	-55.7812	-55.5	-62.7812	-62.9688	-55.1875	-57.625	-63.25	-62.9062	-63.125	-63.1562	-58.7188	-59.3438	-58.9375	-64.8438	-64.5312
		-0.04	2.82	-62.0625	-53.0938	-62.3125	-62.5938	-55.5625	-53.9688	-62.0625	-62.4062	-56.25	-61.75	-56.5	-55.8438	-54.9375	-61.1875	-55.9375	-55.6875	-62.8125	-63	-55.3125	-57.6562	-63.2812	-62.9688	-63.2812	-63.3125	-58.8125	-59.3438	-59.0938	-64.875	-64.4688
		-0.04	2.84	-62.1875	-53.1562	-62.2812	-62.75	-55.7188	-53.9688	-61.9688	-62.4062	-56.25	-61.7812	-56.5938	-55.9062	-54.9062	-61.25	-55.9688	-55.625	-62.9688	-62.9688	-55.3438	-57.8125	-63.3438	-62.9062	-63.3438	-63.3438	-58.8438	-59.5	-59.0625	-64.9062	-64.5938
		-0.04	2.86	-62.25	-53.1875	-62.375	-62.75	-55.7188	-54.0312	-62.0625	-62.5	-56.3438	-61.8125	-56.5312	-55.9375	-55.0312	-61.25	-56.0938	-55.7812	-62.9688	-63.1562	-55.4062	-57.7812	-63.4062	-63.0312	-63.3125	-63.3438	-58.9375	-59.5	-59.125	-64.9688	-64.6562
		-0.04	2.88	-62.2812	-53.2812	-62.4375	-62.7812	-55.8125	-54.1562	-62.0938	-62.5312	-56.3125	-61.8125	-56.6875	-56	-55.0625	-61.3438	-56.1562	-55.875	-63	-63.1875	-55.5	-57.875	-63.4062	-63.125	-63.4062	-63.375	-58.9375	-59.5312	-59.1875	-65	-64.625
		-0.04	2.9	-62.3438	-53.4062	-62.4062	-62.8125	-55.8125	-54.2812	-62.125	-62.5	-56.4688	-61.9688	-56.75	-56.0938	-55.1562	-61.4062	-56.2812	-55.9062	-63.0938	-63.25	-55.625	-58	-63.5	-63.0938	-63.5	-63.5	-59	-59.6875	-59.2188	-65.1562	-64.7812
		-0.04	2.92	-62.2812	-53.5312	-62.5	-62.8438	-55.9375	-54.3125	-62	-62.4375	-56.5625	-62	-56.8125	-56.0625	-55.125	-61.4688	-56.2188	-55.9375	-63.1562	-63.2812	-55.625	-58.0312	-63.5938	-63.1562	-63.4688	-63.5312	-59.1562	-59.75	-59.2812	-65.125	-64.8438
		-0.04	2.94	-62.4062	-53.5312	-62.5938	-62.9375	-55.9688	-54.375	-62.1875	-62.5	-56.5	-62.0625	-56.8438	-56.125	-55.2812	-61.5	-56.3438	-55.9688	-63.125	-63.3438	-55.6875	-58.0312	-63.5	-63.2812	-63.5938	-63.5625	-59.1562	-59.7812	-59.375	-65.25	-64.9062
		-0.04	2.96	-62.4062	-53.5938	-62.5938	-63	-56.0312	-54.4688	-62.2188	-62.4688	-56.5625	-62.125	-56.9062	-56.2188	-55.4375	-61.5	-56.4375	-56.0625	-63.2188	-63.4062	-55.7188	-58.125	-63.6562	-63.1562	-63.7188	-63.6562	-59.1562	-59.9062	-59.4688	-65.25	-65
		-0.04	2.98	-62.5	-53.75	-62.5938	-63	-56.125	-54.5312	-62.2188	-62.4688	-56.6562	-62.2188	-56.875	-56.2188	-55.3125	-61.5	-56.3438	-56.0625	-63.4062	-63.4062	-55.9062	-58.25	-63.7188	-63.3438	-63.6562	-63.5938	-59.3438	-60	-59.5312	-65.25	-65.0938
		-0.04	3	-62.4688	-53.8125	-62.7188	-63	-56.125	-54.625	-62.2812	-62.5938	-56.7188	-62.25	-57	-56.25	-55.4062	-61.625	-56.5	-56.1562	-63.3125	-63.375	-55.9688	-58.1875	-63.6875	-63.4375	-63.75	-63.7812	-59.4375	-60	-59.5625	-65.2812	-65.0938
		-0.04	3.02	-62.5938	-53.7812	-62.75	-63.0625	-56.2188	-54.5938	-62.4062	-62.5938	-56.625	-62.1875	-57.0938	-56.375	-55.5625	-61.6875	-56.5625	-56.25	-63.375	-63.5312	-55.9688	-58.2812	-63.8438	-63.3125	-63.9062	-63.8438	-59.375	-60.0938	-59.5312	-65.3438	-65.2188
		-0.04	3.04	-62.5625	-53.9688	-62.7188	-63.1875	-56.2188	-54.625	-62.4375	-62.6562	-56.8125	-62.3125	-57.0312	-56.4062	-55.625	-61.7188	-56.5938	-56.3125	-63.5	-63.625	-56.0625	-58.3438	-63.9062	-63.4375	-63.8438	-63.9375	-59.4688	-60.1562	-59.7188	-65.4062	-65.2188
		-0.04	3.06	-62.6875	-53.9688	-62.875	-63.0938	-56.4375	-54.8438	-62.5	-62.625	-57.0312	-62.4375	-57.1562	-56.5	-55.625	-61.7812	-56.7188	-56.2812	-63.5	-63.625	-56.125	-58.4062	-63.9375	-63.5938	-63.9375	-63.9688	-59.5625	-60.1562	-59.75	-65.4688	-65.25
		-0.04	3.08	-62.6875	-54	-62.9375	-63.1562	-56.375	-54.75	-62.5625	-62.7188	-56.875	-62.5312	-57.1875	-56.4688	-55.7812	-61.8125	-56.8125	-56.4375	-63.5	-63.75	-56.0625	-58.4688	-63.9062	-63.625	-64.0312	-64.0312	-59.625	-60.1875	-59.7812	-65.4688	-65.3438
		-0.04	3.1	-62.6875	-54.1875	-62.9688	-63.2812	-56.3438	-54.7812	-62.5312	-62.75	-57.0625	-62.4062	-57.1875	-56.5	-55.75	-61.8125	-56.7812	-56.5	-63.5	-63.7812	-56.1875	-58.4688	-64.0312	-63.5312	-64.0312	-64.125	-59.625	-60.1875	-59.7812	-65.5	-65.375
		-0.04	3.12	-62.875	-54.2812	-63	-63.2188	-56.4375	-55	-62.5312	-62.6875	-57.0312	-62.4688	-57.3125	-56.5	-55.75	-61.8438	-56.8438	-56.5312	-63.6562	-63.75	-56.3125	-58.4688	-64.0625	-63.7188	-64.0625	-64.0938	-59.6562	-60.2188	-59.8438	-65.5625	-65.4062
		-0.04	3.14	-62.8438	-54.2188	-63.125	-63.3438	-56.5312	-55	-62.625	-62.8438	-57	-62.5	-57.3438	-56.5938	-55.7812	-61.9062	-56.9375	-56.4688	-63.625	-63.8125	-56.3125	-58.6562	-64.0625	-63.8125	-64.1562	-64.1562	-59.7188	-60.3438	-59.9375	-65.6562	-65.5
		-0.04	3.16	-62.875	-54.3438	-63.0312	-63.5	-56.5	-55	-62.5625	-63	-57.1875	-62.5312	-57.375	-56.5938	-55.9062	-61.9688	-57	-56.625	-63.8125	-63.9375	-56.375	-58.6875	-64.1562	-63.7812	-64.0938	-64.3125	-59.7812	-60.3438	-59.9688	-65.6562	-65.4688
		-0.04	3.18	-63	-54.5	-63.1875	-63.4062	-56.625	-55.125	-62.6875	-62.875	-57.1562	-62.5938	-57.4688	-56.7812	-56	-62	-57	-56.6875	-63.7812	-64.0312	-56.375	-58.6875	-64.1562	-63.8438	-64.2188	-64.2812	-59.9375	-60.4062	-60.0312	-65.7812	-65.4688
		-0.04	3.2	-63	-54.5	-63.25	-63.4688	-56.7188	-55.125	-62.7812	-62.9062	-57.1875	-62.625	-57.4375	-56.7812	-56.0312	-62.1562	-57	-56.625	-63.7812	-63.9375	-56.4062	-58.7812	-64.2812	-63.9062	-64.3125	-64.2812	-59.9688	-60.4688	-60.1875	-65.8438	-65.625
		-0.04	3.22	-63.0938	-54.5	-63.1875	-63.5625	-56.7812	-55.2188	-62.8125	-63	-57.2812	-62.75	-57.4375	-56.7812	-56.0938	-62.125	-57.0312	-56.7812	-63.8438	-64	-56.5	-58.7812	-64.3438	-63.9062	-64.2812	-64.375	-59.9375	-60.5312	-60.125	-65.8438	-65.5938
		-0.04	3.24	-63.1562	-54.625	-63.2812	-63.5938	-56.6562	-55.25	-62.9062	-63.0938	-57.3125	-62.6562	-57.4688	-56.7812	-56.0625	-62.2188	-57.125	-56.875	-63.875	-64.0625	-56.5938	-58.75	-64.4375	-64.0312	-64.4062	-64.4688	-59.9688	-60.5625	-60.125	-65.8438	-65.5938
		-0.04	3.26	-63.1562	-54.7188	-63.375	-63.6562	-56.8125	-55.25	-63	-63.0938	-57.2812	-62.8438	-57.5312	-56.875	-56.25	-62.25	-57.1562	-56.75	-63.9375	-64.0312	-56.5938	-58.9062	-64.5	-64.0625	-64.5312	-64.4375	-60.0312	-60.625	-60.2188	-65.9688	-65.6562
		-0.04	3.28	-63.2812	-54.6562	-63.375	-63.8125	-56.7812	-55.3125	-62.9688	-63.2188	-57.4062	-62.8125	-57.5312	-56.875	-56.1562	-62.2812	-57.1875	-56.875	-63.9375	-64.1875	-56.5938	-58.9375	-64.5	-64.125	-64.5	-64.5312	-60.125	-60.6562	-60.1875	-65.9375	-65.6875
		-0.04	3.3	-63.2812	-54.7188	-63.4688	-63.6875	-56.75	-55.3438	-63.0938	-63.2812	-57.3438	-62.875	-57.625	-56.9688	-56.25	-62.3438	-57.2812	-56.9062	-64.0312	-64.1562	-56.6875	-58.9062	-64.6562	-64.0938	-64.5938	-64.5938	-60.2188	-60.6875	-60.3125	-65.9375	-65.75
		-0.04	3.32	-63.2812	-54.8438	-63.5312	-63.7188	-56.9062	-55.4688	-63.0625	-63.2188	-57.4688	-62.9062	-57.5625	-57.0312	-56.2812	-62.4062	-57.375	-57.0312	-64.0312	-64.1875	-56.7812	-58.9688	-64.5938	-64.1875	-64.5938	-64.5938	-60.1875	-60.75	-60.375	-66.0625	-65.9062
		-0.04	3.34	-63.4062	-54.875	-63.5	-63.7812	-56.9688	-55.4688	-63.125	-63.25	-57.5	-63.0312	-57.5625	-57.0625	-56.2812	-62.4688	-57.3438	-57	-64.0312	-64.25	-56.75	-59	-64.625	-64.3125	-64.625	-64.7188	-60.125	-60.75	-60.4062	-66.0625	-65.875
		-0.04	3.36	-63.4062	-54.9062	-63.5625	-63.875	-56.9062	-55.5625	-63.1562	-63.375	-57.6562	-63.0938	-57.625	-57.0938	-56.375	-62.5938	-57.375	-57.0625	-64.1562	-64.3438	-56.8125	-58.9375	-64.5	-64.2812	-64.5938	-64.7812	-60.3125	-60.7812	-60.4375	-66.0938	-66
		-0.04	3.38	-63.4062	-54.9688	-63.5938	-63.9062	-57.0312	-55.5	-63.25	-63.4062	-57.5625	-63.0938	-57.7812	-57.0625	-56.3438	-62.4688	-57.4062	-57.125	-64.1875	-64.4375	-56.9062	-59.0312	-64.6875	-64.375	-64.7812	-64.7188	-60.3438	-60.8438	-60.5	-66.1875	-66.0938
		-0.04	3.4	-63.5	-55	-63.5625	-63.9062	-57.0312	-55.625	-63.2188	-63.4375	-57.5625	-63.0625	-57.7188	-57.1562	-56.3438	-62.5312	-57.4688	-57.0938	-64.1875	-64.3125	-56.9375	-59.0625	-64.6875	-64.4062	-64.75	-64.75	-60.375	-60.8125	-60.5	-66.2188	-66.0625
		-0.04	3.42	-63.5	-55.0312	-63.5625	-63.8438	-57.0625	-55.7188	-63.2812	-63.5312	-57.7188	-63.1875	-57.8125	-57.1875	-56.375	-62.6875	-57.5	-57.125	-64.3438	-64.4062	-56.875	-59	-64.7188	-64.375	-64.75	-64.9688	-60.5	-60.9062	-60.5312	-66.2812	-66.1562
		-0.04	3.44	-63.5938	-55.1562	-63.6875	-64	-57.0938	-55.7188	-63.4062	-63.5625	-57.6562	-63.2188	-57.8125	-57.25	-56.4375	-62.6562	-57.4375	-57.25	-64.2812	-64.5312	-56.9688	-59.2188	-64.7812	-64.4688	-64.9375	-64.9688	-60.4688	-60.9688	-60.5312	-66.3438	-66.2812
		-0.04	3.46	-63.625	-55.1562	-63.6875	-64.0312	-57.1562	-55.7812	-63.3438	-63.5312	-57.6875	-63.2188	-57.75	-57.2812	-56.5625	-62.7812	-57.5312	-57.25	-64.2812	-64.5312	-57.0938	-59.25	-64.9688	-64.5625	-64.8438	-65	-60.5	-60.9688	-60.5938	-66.3438	-66.2812
		-0.04	3.48	-63.6875	-55.25	-63.75	-64.0625	-57.1562	-55.8125	-63.4062	-63.5625	-57.875	-63.3125	-57.9062	-57.2188	-56.5625	-62.75	-57.6875	-57.2812	-64.4062	-64.5	-57.0625	-59.1875	-64.9062	-64.5625	-64.9375	-65.0312	-60.5625	-61.0312	-60.7188	-66.2812	-66.25
		-0.04	3.5	-63.7188	-55.2812	-63.8438	-64.1875	-57.2188	-55.8438	-63.5938	-63.7188	-57.875	-63.3438	-57.9062	-57.3125	-56.6562	-62.8125	-57.625	-57.3125	-64.4688	-64.625	-57.1875	-59.2188	-64.9688	-64.5312	-64.9688	-65.0312	-60.625	-61.0312	-60.7188	-66.4375	-66.3438
		-0.04	3.52	-63.7812	-55.4062	-63.9062	-64.0312	-57.1875	-55.875	-63.5	-63.75	-57.8438	-63.3125	-57.9062	-57.375	-56.5938	-62.8125	-57.5938	-57.4688	-64.4062	-64.5938	-57.1875	-59.2812	-65.0625	-64.5938	-65.0312	-65.0938	-60.5938	-61.0625	-60.75	-66.4688	-66.3125
		-0.04	3.54	-63.7812	-55.375	-64.0312	-64.0938	-57.2188	-55.9688	-63.5	-63.7188	-57.9688	-63.4062	-57.875	-57.4062	-56.625	-62.9688	-57.7188	-57.4062	-64.4062	-64.6875	-57.2812	-59.375	-65.0938	-64.6875	-65.0312	-65.1875	-60.6875	-61.0625	-60.8438	-66.4688	-66.375
		-0.04	3.56	-63.8125	-55.3438	-64.0312	-64.1562	-57.3125	-55.9062	-63.625	-63.7812	-58.0312	-63.4688	-57.8438	-57.4688	-56.625	-62.9688	-57.7812	-57.3438	-64.4688	-64.6875	-57.3125	-59.2812	-65.125	-64.7812	-65.0625	-65.1562	-60.6562	-61.125	-60.8438	-66.5938	-66.5
		-0.04	3.58	-63.8125	-55.3438	-64.0312	-64.1562	-57.3438	-56	-63.6562	-63.875	-58.0312	-63.4375	-57.875	-57.5	-56.6562	-63	-57.7812	-57.5	-64.4062	-64.7188	-57.3125	-59.4375	-65.1562	-64.7188	-65.1562	-65.2812	-60.7188	-61.125	-60.8438	-66.5938	-66.4375
		-0.04	3.6	-63.8438	-55.4688	-64.0625	-64.1562	-57.4062	-56.0312	-63.75	-63.8438	-57.9688	-63.5	-57.9375	-57.4688	-56.75	-63.0312	-57.8438	-57.5625	-64.5312	-64.6875	-57.375	-59.4688	-65.1875	-64.7812	-65.1875	-65.3438	-60.7188	-61.125	-60.8438	-66.5625	-66.5
		-0.04	3.62	-63.9062	-55.4375	-64.125	-64.2812	-57.4375	-56.0938	-63.75	-64.0312	-58.0312	-63.5312	-57.9375	-57.5	-56.75	-63.0312	-57.8125	-57.4688	-64.5625	-64.7812	-57.5312	-59.375	-65.1562	-64.8125	-65.25	-65.3438	-60.7812	-61.2188	-60.875	-66.6562	-66.5312
		-0.04	3.64	-64.0312	-55.5	-64.0938	-64.2812	-57.375	-56.0938	-63.7812	-64.0312	-58	-63.5938	-57.9375	-57.5625	-56.75	-63.125	-57.8125	-57.5	-64.5	-64.8125	-57.4688	-59.5	-65.2188	-64.7188	-65.3438	-65.375	-60.7188	-61.25	-60.9375	-66.6875	-66.5
		-0.04	3.66	-64.0625	-55.625	-64.1875	-64.3438	-57.4062	-56.1875	-63.8438	-64.0625	-58.0625	-63.5312	-58.0938	-57.4688	-56.7812	-63.125	-57.9062	-57.5938	-64.5312	-64.8438	-57.4688	-59.5	-65.375	-64.8438	-65.4375	-65.4062	-60.7812	-61.1875	-60.9375	-66.6875	-66.5625
		-0.04	3.68	-64.0625	-55.6562	-64.1875	-64.4688	-57.4375	-56.125	-63.875	-64.0625	-58.0625	-63.6875	-58.0625	-57.5625	-56.8125	-63.2188	-57.8438	-57.6562	-64.5312	-64.9688	-57.5312	-59.4688	-65.4062	-64.9688	-65.4375	-65.3438	-60.875	-61.3438	-60.9688	-66.7812	-66.625
		-0.04	3.7	-64.125	-55.6875	-64.1875	-64.4688	-57.4062	-56.2188	-63.9375	-64.1562	-58.1562	-63.75	-58.0312	-57.6875	-56.7812	-63.1875	-57.9062	-57.7188	-64.5938	-65	-57.5625	-59.5312	-65.3125	-65	-65.4375	-65.5	-60.8438	-61.1875	-61	-66.7812	-66.5625
		-0.04	3.72	-64.0938	-55.6875	-64.3125	-64.5	-57.5	-56.2812	-64.0312	-64.1875	-58.1875	-63.6562	-58.25	-57.6562	-56.9062	-63.25	-57.9375	-57.75	-64.5938	-65.0312	-57.5938	-59.5625	-65.4375	-65.0312	-65.3438	-65.5	-60.8125	-61.2188	-61.0625	-66.7812	-66.75
		-0.04	3.74	-64.0625	-55.7812	-64.3438	-64.4688	-57.5	-56.3438	-63.9375	-64.2188	-58.2188	-63.8125	-58.1562	-57.6562	-56.9375	-63.375	-58.0312	-57.7188	-64.5312	-65	-57.625	-59.5938	-65.5	-65.0625	-65.4062	-65.5	-60.8438	-61.4375	-61	-66.75	-66.7188
		-0.04	3.76	-64.0938	-55.8125	-64.4062	-64.5312	-57.5	-56.3438	-64.0312	-64.2812	-58.1875	-63.75	-58.1562	-57.75	-57	-63.4062	-58.0938	-57.6875	-64.625	-65.0625	-57.6562	-59.5938	-65.5312	-65.125	-65.4062	-65.5938	-60.9062	-61.3438	-61.0625	-66.8125	-66.7188
		-0.04	3.78	-64.25	-55.8125	-64.4688	-64.6875	-57.5938	-56.4062	-64.0312	-64.375	-58.1875	-63.7812	-58.25	-57.7812	-56.9688	-63.4688	-58.0312	-57.8125	-64.5938	-65.0625	-57.6875	-59.6562	-65.5312	-65.2188	-65.5	-65.5938	-60.875	-61.375	-61	-66.8438	-66.75
		-0.04	3.8	-64.2812	-55.9062	-64.4688	-64.5938	-57.5625	-56.4375	-64.0312	-64.3438	-58.25	-63.875	-58.2188	-57.7188	-57	-63.5	-58.0625	-57.875	-64.75	-65.1875	-57.7812	-59.5938	-65.5625	-65.2188	-65.5312	-65.5625	-61	-61.4688	-61.0938	-66.9688	-66.8438
		-0.04	3.82	-64.3125	-55.9062	-64.5312	-64.7188	-57.5625	-56.4062	-64.0625	-64.3125	-58.2188	-63.875	-58.2188	-57.8125	-57	-63.5625	-58.0938	-57.8125	-64.7812	-65.0938	-57.8438	-59.5625	-65.7188	-65.375	-65.625	-65.75	-61	-61.4062	-61.0625	-66.9688	-66.75
		-0.04	3.84	-64.3438	-55.9062	-64.5312	-64.7188	-57.6562	-56.5625	-64.1562	-64.4062	-58.3438	-63.9062	-58.375	-57.8438	-56.9688	-63.5625	-58.0625	-57.875	-64.8438	-65.2812	-57.8438	-59.5625	-65.625	-65.2812	-65.5938	-65.8125	-60.9688	-61.5	-61.0625	-66.9062	-66.8438
		-0.04	3.86	-64.4062	-56	-64.625	-64.75	-57.5938	-56.5312	-64.0938	-64.5312	-58.375	-63.9062	-58.4062	-57.8125	-57.0312	-63.625	-58.125	-57.9688	-64.8125	-65.2812	-57.875	-59.5938	-65.6562	-65.25	-65.6875	-65.7812	-61.0312	-61.4688	-61.125	-67.0312	-66.9375
		-0.04	3.88	-64.5	-56.0625	-64.5312	-64.7188	-57.5938	-56.4688	-64.125	-64.5	-58.375	-63.9375	-58.2812	-57.9062	-57.0938	-63.6562	-58.1875	-57.9375	-64.9062	-65.2188	-57.875	-59.6875	-65.75	-65.4375	-65.6875	-65.8438	-61.125	-61.375	-61.2188	-67.0938	-66.875
		-0.04	3.9	-64.5	-56.0312	-64.6875	-64.7812	-57.6562	-56.5312	-64.2812	-64.5625	-58.4062	-64.0312	-58.375	-57.9062	-57.0938	-63.625	-58.25	-58	-64.9375	-65.3125	-57.9062	-59.75	-65.7812	-65.4375	-65.7188	-65.7812	-61.0938	-61.5	-61.2188	-67	-66.9688
		-0.04	3.92	-64.5312	-56.0312	-64.625	-64.8438	-57.625	-56.5625	-64.2188	-64.5938	-58.5312	-64.0312	-58.3125	-57.8438	-57.0625	-63.6875	-58.1875	-58.0312	-64.9375	-65.4375	-57.8438	-59.7812	-65.7812	-65.4375	-65.8125	-65.875	-61.125	-61.5625	-61.25	-67.0938	-67.0312
		-0.04	3.94	-64.5625	-56.0938	-64.7812	-64.9375	-57.625	-56.5312	-64.3125	-64.6562	-58.5	-64.0312	-58.375	-57.9375	-57.2188	-63.75	-58.25	-57.9375	-64.9375	-65.375	-57.8438	-59.8125	-65.9062	-65.4062	-65.7812	-65.9688	-61.1875	-61.5	-61.3125	-67.0625	-67
		-0.04	3.96	-64.5625	-56.1562	-64.8125	-64.9688	-57.7188	-56.5938	-64.2812	-64.6875	-58.5312	-64.0938	-58.4375	-58.0312	-57.25	-63.7188	-58.2812	-58.0312	-65.0625	-65.5	-58	-59.8438	-65.9375	-65.5	-65.8438	-65.9688	-61.125	-61.5312	-61.1875	-67.0938	-67.0625
		-0.04	3.98	-64.5625	-56.1562	-64.7188	-64.9375	-57.5938	-56.5938	-64.375	-64.8438	-58.5625	-64.1562	-58.4062	-57.9688	-57.1562	-63.8125	-58.3125	-58.0625	-65.0625	-65.4375	-58.0312	-59.8438	-65.9688	-65.5625	-65.875	-66.0625	-61.1562	-61.6562	-61.2812	-67.2188	-67.0938
		-0.04	4	-64.6875	-56.1875	-64.8438	-65	-57.6875	-56.7188	-64.4688	-64.7188	-58.5625	-64.1875	-58.4375	-58	-57.2188	-63.8438	-58.3125	-58.0312	-65.0938	-65.4688	-58.0312	-59.8438	-65.9688	-65.5625	-65.9062	-66	-61.2188	-61.625	-61.3125	-67.2188	-67.0312
		-0.04	4.02	-64.6875	-56.2188	-64.8125	-64.875	-57.75	-56.75	-64.375	-64.7812	-58.5312	-64.1562	-58.3438	-58.0625	-57.2812	-63.7812	-58.375	-58	-65.1562	-65.5625	-58	-59.9062	-66.0312	-65.5938	-66	-66.125	-61.1875	-61.5	-61.2812	-67.2812	-67.0938
		-0.04	4.04	-64.6875	-56.3438	-64.8438	-65	-57.625	-56.75	-64.4688	-64.8438	-58.5938	-64.2812	-58.4062	-58.0625	-57.3438	-63.875	-58.2812	-58.125	-65.0312	-65.5	-58.0938	-59.8125	-66.0312	-65.6875	-66.0312	-66.1562	-61.2188	-61.7188	-61.3438	-67.2812	-67.1875
		-0.04	4.06	-64.7812	-56.3125	-64.9375	-65.0938	-57.6875	-56.7812	-64.5	-64.9062	-58.5938	-64.2812	-58.375	-58.0312	-57.3125	-63.9688	-58.375	-58.1562	-65.1562	-65.5312	-58.0312	-59.875	-66	-65.6562	-66.0625	-66.2188	-61.2812	-61.6562	-61.375	-67.3125	-67.2188
		-0.04	4.08	-64.7812	-56.3438	-64.9375	-65.0312	-57.7188	-56.8438	-64.4375	-64.8438	-58.5312	-64.3125	-58.5625	-58.1562	-57.375	-64	-58.4062	-58.2188	-65.1562	-65.5312	-58.1562	-59.8125	-66	-65.625	-66.0625	-66.3125	-61.25	-61.625	-61.3438	-67.375	-67.2188
		-0.04	4.1	-64.75	-56.4375	-64.9688	-65.0312	-57.7188	-56.8125	-64.5312	-64.9688	-58.5938	-64.3438	-58.5	-58.1562	-57.375	-64.0312	-58.4688	-58.1875	-65.25	-65.5625	-58.125	-59.9688	-66.0938	-65.6875	-66.0938	-66.2812	-61.2812	-61.6562	-61.4688	-67.5	-67.2812
		-0.04	4.12	-64.8125	-56.4062	-65	-65.1562	-57.8438	-56.8438	-64.5938	-64.9062	-58.6875	-64.375	-58.5625	-58.0938	-57.4062	-64.0625	-58.3125	-58.2188	-65.125	-65.5938	-58.125	-59.9062	-66.0938	-65.7812	-66.1562	-66.25	-61.3438	-61.7188	-61.4688	-67.4688	-67.2188
		-0.04	4.14	-64.8438	-56.3438	-65	-65.1562	-57.7188	-56.9375	-64.5312	-65	-58.6562	-64.4688	-58.5625	-58.1562	-57.4062	-64.0625	-58.4062	-58.1875	-65.2812	-65.7812	-58.1875	-59.8438	-66.125	-65.6562	-66.1562	-66.3438	-61.3125	-61.625	-61.4062	-67.5	-67.2188
		-0.04	4.16	-65	-56.4062	-65.0938	-65.25	-57.75	-56.875	-64.5625	-65.0312	-58.5625	-64.4375	-58.5312	-58.25	-57.5312	-64.0938	-58.5312	-58.2188	-65.25	-65.7188	-58.3125	-59.9375	-66.2812	-65.7812	-66.1875	-66.3125	-61.2812	-61.6875	-61.4688	-67.5	-67.4062
		-0.04	4.18	-64.9375	-56.4062	-65.0625	-65.1562	-57.7812	-57	-64.6562	-65.0625	-58.75	-64.4375	-58.5312	-58.1562	-57.5312	-64.1562	-58.5	-58.2188	-65.2188	-65.6562	-58.1875	-60	-66.1875	-65.8438	-66.1875	-66.3438	-61.3125	-61.7188	-61.5	-67.4688	-67.2188
		-0.04	4.2	-64.9062	-56.4688	-65.0625	-65.1875	-57.8125	-57.0312	-64.6562	-65.0625	-58.75	-64.5312	-58.5938	-58.3125	-57.5	-64.0938	-58.4688	-58.3438	-65.3438	-65.7188	-58.2812	-60	-66.25	-65.8438	-66.1875	-66.4375	-61.4062	-61.75	-61.4375	-67.5312	-67.375
		-0.04	4.22	-64.9688	-56.4375	-65.1875	-65.25	-57.8125	-57	-64.7188	-65.1562	-58.7188	-64.5625	-58.625	-58.3125	-57.4688	-64.2812	-58.4688	-58.375	-65.4062	-65.6875	-58.3125	-60.0938	-66.2812	-65.875	-66.3125	-66.375	-61.4062	-61.8438	-61.5312	-67.5312	-67.5
		-0.04	4.24	-64.9688	-56.5	-65.1562	-65.25	-57.8438	-57.0625	-64.6562	-65.1562	-58.875	-64.5625	-58.625	-58.3125	-57.5625	-64.3125	-58.4375	-58.3125	-65.4375	-65.8438	-58.3125	-60.0312	-66.3125	-65.8125	-66.25	-66.4062	-61.4375	-61.875	-61.5	-67.4688	-67.3125
		-0.04	4.26	-64.9688	-56.5312	-65.2188	-65.3438	-57.875	-57.0312	-64.7188	-65.0625	-58.875	-64.625	-58.6562	-58.3125	-57.625	-64.25	-58.4688	-58.3125	-65.4062	-65.875	-58.2812	-59.9688	-66.25	-65.8438	-66.1875	-66.5	-61.5	-61.9062	-61.5938	-67.5312	-67.4688
		-0.04	4.28	-65.0938	-56.5	-65.2188	-65.375	-57.9062	-57.0312	-64.8125	-65.2812	-58.8438	-64.5938	-58.5	-58.4062	-57.5	-64.25	-58.5	-58.3125	-65.4688	-65.8438	-58.4062	-60.0938	-66.3438	-65.9062	-66.3438	-66.4688	-61.4375	-61.9062	-61.6875	-67.5938	-67.5
		-0.04	4.3	-65.0312	-56.625	-65.2812	-65.3125	-57.9688	-57.0938	-64.8125	-65.2188	-58.9688	-64.625	-58.5938	-58.3125	-57.5938	-64.4062	-58.5625	-58.2812	-65.4688	-65.8438	-58.3438	-60.1562	-66.4062	-65.9375	-66.3438	-66.5625	-61.5	-61.9062	-61.5625	-67.7188	-67.4688
		-0.04	4.32	-65.0312	-56.6562	-65.375	-65.375	-57.875	-57.0938	-64.9062	-65.25	-58.9375	-64.625	-58.6562	-58.375	-57.6875	-64.3125	-58.5938	-58.4688	-65.4062	-65.9062	-58.4688	-60.0938	-66.375	-65.9688	-66.3438	-66.5312	-61.5	-61.9062	-61.5938	-67.6875	-67.5312
		-0.04	4.34	-65.1562	-56.6875	-65.3125	-65.4062	-57.9375	-57	-64.9062	-65.2812	-58.9062	-64.7188	-58.5625	-58.4062	-57.6562	-64.375	-58.5938	-58.3125	-65.5	-65.9688	-58.5	-60.0938	-66.375	-66.0938	-66.4062	-66.5312	-61.5312	-61.875	-61.6562	-67.7188	-67.5625
		-0.04	4.36	-65.1562	-56.5938	-65.2812	-65.4062	-57.9688	-57.2188	-64.8438	-65.3438	-58.9688	-64.6562	-58.5938	-58.4375	-57.6562	-64.4688	-58.625	-58.4062	-65.5625	-66.0625	-58.4688	-60.2188	-66.375	-66.0312	-66.4062	-66.6562	-61.4375	-61.9688	-61.5938	-67.7812	-67.5938
		-0.04	4.38	-65.1562	-56.7188	-65.3438	-65.5	-58	-57.1562	-64.9688	-65.375	-58.9375	-64.6562	-58.6562	-58.4062	-57.6562	-64.4375	-58.6562	-58.5	-65.5312	-66.0312	-58.375	-60.1562	-66.4062	-66.0938	-66.4062	-66.6875	-61.5312	-61.9375	-61.625	-67.8438	-67.5312
		-0.04	4.4	-65.25	-56.7188	-65.4062	-65.5312	-57.9375	-57.125	-64.9375	-65.4688	-58.9375	-64.7812	-58.5	-58.5312	-57.7812	-64.4688	-58.625	-58.375	-65.625	-66	-58.5312	-60.25	-66.4688	-66.1562	-66.4062	-66.6562	-61.5312	-61.9062	-61.625	-67.8438	-67.6562
		-0.04	4.42	-65.2812	-56.6875	-65.4375	-65.5312	-57.9062	-57.0938	-64.9688	-65.375	-58.9375	-64.7812	-58.8125	-58.5	-57.75	-64.5625	-58.6875	-58.4062	-65.7188	-66.0625	-58.5	-60.25	-66.4062	-66.2188	-66.4062	-66.75	-61.5	-61.9688	-61.5938	-67.9062	-67.5938
		-0.04	4.44	-65.25	-56.75	-65.4375	-65.5625	-57.9375	-57.25	-65	-65.5312	-58.9688	-64.6875	-58.6875	-58.5312	-57.75	-64.4688	-58.7188	-58.5	-65.6875	-66.0312	-58.5625	-60.1875	-66.5312	-66.2188	-66.4375	-66.7812	-61.5312	-62	-61.6562	-67.8125	-67.5938
		-0.04	4.46	-65.3438	-56.75	-65.4688	-65.5312	-58.0312	-57.125	-65	-65.4375	-58.9375	-64.7812	-58.8125	-58.5	-57.8438	-64.5312	-58.7188	-58.4688	-65.6562	-66.0312	-58.5	-60.2812	-66.5312	-66.25	-66.5625	-66.8125	-61.5938	-61.9688	-61.7188	-67.9375	-67.5938
		-0.04	4.48	-65.2812	-56.8125	-65.5	-65.5312	-58.0312	-57.125	-65	-65.4062	-58.9062	-64.7812	-58.7188	-58.5312	-57.8125	-64.6562	-58.7188	-58.5	-65.7188	-66.0625	-58.5	-60.1875	-66.5312	-66.2812	-66.5938	-66.75	-61.5312	-62.0938	-61.75	-67.9062	-67.625
		-0.04	4.5	-65.375	-56.8125	-65.5	-65.5938	-58	-57.1875	-65.0312	-65.5	-58.9688	-64.7812	-58.7812	-58.5	-57.7812	-64.5938	-58.7812	-58.5312	-65.6875	-66.125	-58.6562	-60.2812	-66.5	-66.25	-66.5938	-66.7188	-61.625	-62	-61.8125	-67.9375	-67.6562
		-0.04	4.52	-65.375	-56.875	-65.5312	-65.5938	-58.0938	-57.2812	-65.0625	-65.5312	-59.0312	-64.8438	-58.8125	-58.5	-57.8438	-64.6562	-58.7812	-58.5312	-65.6562	-66.1562	-58.5938	-60.2812	-66.6875	-66.4062	-66.5	-66.8438	-61.625	-62	-61.7188	-67.9062	-67.7188
		-0.04	4.54	-65.4062	-56.8438	-65.5312	-65.5938	-58.0312	-57.25	-65.0938	-65.5	-58.9062	-64.9062	-58.75	-58.5938	-57.8438	-64.7188	-58.8125	-58.5938	-65.6875	-66.0625	-58.5625	-60.2188	-66.5938	-66.375	-66.6562	-66.9062	-61.5625	-62.0625	-61.6562	-68	-67.75
		-0.04	4.56	-65.5312	-56.8438	-65.5938	-65.6875	-58.0938	-57.3438	-65.0938	-65.6562	-58.9688	-64.8125	-58.8438	-58.5625	-57.7812	-64.6562	-58.8125	-58.5938	-65.8125	-66.1875	-58.5938	-60.25	-66.6562	-66.4062	-66.625	-66.8125	-61.5312	-62.0625	-61.8438	-67.9375	-67.625
		-0.04	4.58	-65.5	-56.9062	-65.5938	-65.6562	-58.0312	-57.3438	-65.1562	-65.5312	-59.0938	-64.8125	-58.8438	-58.5	-57.8438	-64.7188	-58.875	-58.5312	-65.7188	-66.25	-58.6875	-60.2812	-66.625	-66.3438	-66.7188	-66.9062	-61.625	-62.0938	-61.8438	-68.0312	-67.7188
		-0.04	4.6	-65.4688	-56.9688	-65.7188	-65.7188	-58.125	-57.3125	-65.1562	-65.5625	-59.0312	-64.9375	-58.75	-58.5312	-57.9062	-64.7812	-58.8125	-58.625	-65.7812	-66.25	-58.6562	-60.25	-66.6562	-66.5	-66.6875	-66.8438	-61.6562	-62.0625	-61.7812	-68.0312	-67.7812
		-0.04	4.62	-65.5312	-56.9062	-65.6875	-65.6875	-58.0938	-57.3438	-65.1562	-65.6875	-59.0938	-64.9062	-58.9062	-58.5625	-57.9062	-64.7188	-58.8438	-58.6875	-65.875	-66.1562	-58.625	-60.3438	-66.5938	-66.4062	-66.625	-66.9062	-61.6875	-62.0312	-61.8438	-68.0312	-67.7812
		-0.04	4.64	-65.5312	-56.9062	-65.6875	-65.7188	-58.0625	-57.375	-65.2188	-65.7188	-59.1562	-64.9688	-58.875	-58.5312	-57.9688	-64.8125	-58.9062	-58.625	-65.9375	-66.25	-58.6562	-60.3125	-66.625	-66.4375	-66.625	-67	-61.6562	-62.0312	-61.75	-68.0938	-67.8125
		-0.04	4.66	-65.5625	-57	-65.6875	-65.7812	-58.0312	-57.3125	-65.2188	-65.625	-59.1562	-64.9688	-58.9062	-58.5312	-57.9688	-64.9062	-58.875	-58.75	-65.9062	-66.25	-58.6562	-60.2812	-66.6875	-66.5312	-66.75	-66.875	-61.75	-62.0312	-61.8125	-68.0625	-67.9375
		-0.04	4.68	-65.6875	-56.9375	-65.6562	-65.8438	-58.2188	-57.3438	-65.25	-65.6875	-59.125	-65	-58.9688	-58.5938	-57.9062	-64.9062	-58.8125	-58.7812	-65.9688	-66.2812	-58.6875	-60.2812	-66.7188	-66.5625	-66.75	-66.9062	-61.7188	-62.0625	-61.8125	-68.1562	-67.9062
		-0.04	4.7	-65.6875	-56.9688	-65.6562	-65.8125	-58.2188	-57.4062	-65.375	-65.5938	-59.1875	-65.0312	-58.9688	-58.5938	-57.9062	-64.8438	-58.875	-58.75	-65.9688	-66.2812	-58.7188	-60.3125	-66.6875	-66.5	-66.7188	-67.0625	-61.7188	-62.0625	-61.7812	-68.0625	-67.8125
		-0.04	4.72	-65.6562	-56.9688	-65.7812	-65.9062	-58.1875	-57.4375	-65.3125	-65.8438	-59.1562	-65.0938	-58.9375	-58.5938	-58.0625	-64.9375	-58.8438	-58.7188	-65.9688	-66.3125	-58.6875	-60.3438	-66.7812	-66.5312	-66.8125	-66.9688	-61.7188	-62.1562	-61.7812	-68.0938	-67.9062
		-0.04	4.74	-65.7188	-57	-65.7188	-65.8438	-58.1562	-57.375	-65.3125	-65.7812	-59.0938	-65.0625	-58.9062	-58.75	-58	-64.9688	-58.9688	-58.75	-65.9688	-66.4062	-58.5938	-60.3438	-66.8125	-66.6562	-66.875	-67	-61.6875	-62.125	-61.875	-68.0938	-67.875
		-0.04	4.76	-65.7188	-57	-65.8438	-65.9062	-58.2188	-57.4375	-65.375	-65.8438	-59.2188	-65	-59.0625	-58.6875	-58	-64.8438	-58.9375	-58.8125	-66.0938	-66.4062	-58.875	-60.4375	-66.7812	-66.5312	-66.7188	-67.0625	-61.7188	-62.125	-61.9375	-68.0938	-67.9062
		-0.04	4.78	-65.7188	-57.0938	-65.8125	-65.9688	-58.1875	-57.4375	-65.375	-65.8438	-59.1875	-65.0625	-59	-58.6875	-58.125	-64.9375	-58.9375	-58.8438	-66.0312	-66.375	-58.7188	-60.4688	-66.8125	-66.5625	-66.7812	-66.9688	-61.8125	-62.2188	-61.8125	-68.125	-67.9688
		-0.04	4.8	-65.7812	-57.0625	-65.7812	-65.9688	-58.25	-57.5	-65.4375	-65.9062	-59.25	-65.2188	-59	-58.8125	-58.0938	-64.9375	-59.0625	-58.7812	-65.9375	-66.4062	-58.7812	-60.4062	-66.8125	-66.5938	-66.8438	-67.125	-61.6875	-62.1875	-61.9375	-68.25	-67.9375
		-0.04	4.82	-65.6562	-57.0312	-65.9062	-66	-58.2188	-57.5	-65.4062	-65.8125	-59.2188	-65.2188	-59.0312	-58.7812	-58.0625	-64.9688	-58.875	-58.8125	-66.0938	-66.375	-58.9375	-60.4375	-66.6875	-66.7188	-66.7812	-67.0938	-61.6875	-62.1562	-61.875	-68.1875	-67.875
		-0.04	4.84	-65.75	-57.0938	-65.8438	-66	-58.25	-57.375	-65.3438	-65.9688	-59.2812	-65.1875	-58.9375	-58.7188	-58.1562	-65.0312	-58.9375	-58.7812	-66.0938	-66.4375	-58.8438	-60.4375	-66.8438	-66.625	-66.8438	-67.0938	-61.75	-62.2188	-61.8125	-68.2188	-68.0312
		-0.04	4.86	-65.7188	-57	-65.875	-65.9062	-58.2812	-57.5	-65.375	-65.9062	-59.1875	-65.2188	-59.0312	-58.875	-58.125	-65.0625	-59	-58.9062	-66.0938	-66.4688	-58.8438	-60.3125	-66.9688	-66.6562	-66.9375	-67.0938	-61.8438	-62.1875	-61.9375	-68.2812	-68.0312
		-0.04	4.88	-65.7812	-57.0312	-65.9062	-66	-58.1875	-57.5	-65.5	-65.9062	-59.2188	-65.1562	-58.9688	-58.7812	-58.0938	-65.0938	-59	-58.875	-66.0625	-66.5625	-58.9062	-60.4688	-66.8438	-66.7188	-66.9062	-67.1875	-61.7812	-62.0938	-61.9375	-68.2812	-67.9375
		-0.04	4.9	-65.7812	-57.1562	-65.8125	-66	-58.2812	-57.5312	-65.5	-65.9688	-59.2812	-65.25	-58.9062	-58.6875	-58.25	-65.125	-58.9375	-58.875	-66.1562	-66.5312	-58.875	-60.4688	-66.9062	-66.75	-66.8438	-67.1875	-61.8125	-62.2188	-61.875	-68.25	-68.0312
		-0.04	4.92	-65.8125	-57.1562	-65.8125	-66.0312	-58.3438	-57.5625	-65.5312	-66	-59.25	-65.2188	-58.9375	-58.75	-58.2188	-65.1562	-59.0312	-58.8438	-66.1562	-66.5938	-58.8438	-60.4688	-66.9688	-66.6875	-66.9062	-67.2188	-61.8438	-62.2188	-62	-68.3125	-68.0938
		-0.04	4.94	-65.8125	-57.125	-65.8438	-66.0312	-58.375	-57.625	-65.5938	-66.0312	-59.25	-65.25	-59.0625	-58.7812	-58.1562	-65.1562	-59	-58.8438	-66.25	-66.5312	-58.9688	-60.4688	-66.9375	-66.75	-66.9375	-67.25	-61.8438	-62.1875	-61.9062	-68.2812	-68.0625
		-0.04	4.96	-65.7812	-57.1875	-65.8125	-66.0312	-58.4062	-57.5312	-65.5312	-66.0625	-59.3125	-65.3125	-59.0625	-58.8438	-58.1562	-65.2812	-58.9375	-58.9375	-66.25	-66.6562	-58.9062	-60.4688	-66.9062	-66.875	-66.9375	-67.2188	-61.875	-62.25	-61.9062	-68.3438	-68.0625
		-0.04	4.98	-65.875	-57.1875	-65.8125	-66.0625	-58.2188	-57.5938	-65.5938	-65.9375	-59.25	-65.3438	-59.0312	-58.7812	-58.1562	-65.2188	-59.0312	-59	-66.2188	-66.625	-58.9375	-60.5	-67.0625	-66.875	-67	-67.3125	-61.9062	-62.3125	-61.9688	-68.3438	-68.0938
		0.06	0	-60.5	-60.0938	-60.0625	-60.7812	-61.1562	-61.5	-61.375	-61.4062	-62.375	-63.6562	-62.0938	-62.7188	-63.7188	-63.9375	-63.3125	-63.5938
		0.06	0.02	-60.5	-60.1875	-60	-60.75	-61.2188	-61.375	-61.4375	-61.4688	-62.4062	-63.7188	-62.0625	-62.6562	-63.8438	-63.875	-63.2812	-63.5938
		0.06	0.04	-60.5312	-60.0938	-59.9375	-60.75	-61.2188	-61.4062	-61.4062	-61.5	-62.4375	-63.5625	-62.0938	-62.6875	-63.8125	-63.8438	-63.25	-63.5625
		0.06	0.06	-60.5938	-60.125	-60.0938	-60.7812	-61.25	-61.375	-61.3438	-61.5312	-62.4688	-63.6562	-62.1875	-62.7188	-63.7812	-63.9062	-63.2812	-63.5312
		0.06	0.08	-60.5	-60.0312	-59.8438	-60.5625	-61.1875	-61.1875	-61.2188	-61.3438	-62.3125	-63.5	-61.9375	-62.5312	-63.6875	-63.75	-63.1562	-63.5625
		0.06	0.1	-61.2188	-60.7188	-60.5	-61.3125	-61.75	-61.9062	-61.9375	-62	-62.9375	-64.0938	-62.5938	-63.1875	-64.25	-64.4062	-63.75	-64.125
		0.06	0.12	-65.1562	-64.6562	-64.5312	-65.3125	-65.5312	-65.6562	-65.6562	-65.7188	-66.9375	-68.1875	-66.6562	-67.2188	-67.9375	-68.0938	-67.5	-67.8125
		0.06	0.14	-67.8125	-67.375	-67.2188	-67.9375	-68.1562	-68.2812	-68.3125	-68.4375	-69.7812	-71.0625	-69.4688	-70.0312	-70.5625	-70.8438	-70.0312	-70.5938
		0.06	0.16	-67.7812	-67.25	-67.1562	-67.8438	-68.1875	-68.4062	-68.3438	-68.5	-69.8438	-71	-69.5	-70.0312	-70.7188	-70.9062	-70.1875	-70.5
		0.06	0.18	-66.8438	-66.2812	-66.2812	-66.9375	-67.4062	-67.4375	-67.4688	-67.5625	-68.8125	-70.125	-68.5625	-69.0938	-69.8125	-70.1562	-69.4688	-69.6875
		0.06	0.2	-65.6875	-65.2188	-65.0938	-65.7812	-66.3125	-66.4062	-66.4375	-66.5312	-67.5625	-68.8125	-67.25	-67.9062	-68.875	-69.0312	-68.2812	-68.6875
		0.06	0.22	-64.625	-64.0938	-64.0312	-64.7188	-65.2188	-65.4062	-65.4062	-65.6562	-66.4375	-67.6562	-66.1562	-66.7188	-67.7812	-68	-67.2812	-67.5938
		0.06	0.24	-63.8125	-63.3125	-63.1562	-63.9062	-64.4062	-64.5625	-64.4688	-64.7188	-65.5625	-66.7812	-65.2812	-65.7812	-66.8438	-67.0625	-66.4062	-66.7812
		0.06	0.26	-63.1562	-62.625	-62.5	-63.1875	-63.875	-64.0312	-63.9375	-64.0312	-64.875	-66.125	-64.4688	-65.0938	-66.3125	-66.4688	-65.7188	-66.125
		0.06	0.28	-62.6875	-62.0938	-62	-62.7188	-63.2812	-63.5	-63.4062	-63.5312	-64.4062	-65.5312	-64.0625	-64.625	-65.7812	-65.9062	-65.25	-65.5938
		0.06	0.3	-62.1562	-61.8125	-61.625	-62.375	-62.9062	-63.0938	-63.0312	-63.1875	-64.0312	-65.125	-63.7188	-64.1562	-65.4062	-65.5	-64.8125	-65.2812
		0.06	0.32	-61.875	-61.4375	-61.375	-62	-62.6562	-62.875	-62.6562	-62.8438	-63.6875	-64.9375	-63.3125	-63.9375	-65.1562	-65.3438	-64.5312	-64.9688
		0.06	0.34	-61.7812	-61.25	-61.125	-61.9062	-62.5	-62.625	-62.5	-62.6875	-63.5	-64.6562	-63.0625	-63.7812	-64.9062	-65.0938	-64.375	-64.6875
		0.06	0.36	-61.4688	-61.0312	-60.9688	-61.6562	-62.2188	-62.3438	-62.4062	-62.5625	-63.3125	-64.5	-62.9688	-63.5	-64.6562	-64.8438	-64.1562	-64.4688
		0.06	0.38	-61.375	-60.9375	-60.75	-61.5	-62.125	-62.2812	-62.2188	-62.3125	-63.1875	-64.4062	-62.875	-63.4062	-64.5938	-64.7188	-64.0312	-64.4688
		0.06	0.4	-61.2812	-60.8438	-60.6562	-61.4688	-62.0312	-62.125	-62.1562	-62.2188	-63.0938	-64.2188	-62.7812	-63.375	-64.4062	-64.625	-63.9375	-64.2812
		0.06	0.42	-61.1562	-60.7812	-60.5625	-61.25	-61.8438	-62	-61.9375	-62.1562	-62.9375	-64.125	-62.6875	-63.125	-64.3438	-64.5	-63.8125	-64.1562
		0.06	0.44	-61.0625	-60.6875	-60.5	-61.3125	-61.8438	-61.9062	-61.8125	-62.0625	-62.875	-64.1875	-62.5625	-63.0625	-64.3125	-64.4375	-63.7812	-64.1875
		0.06	0.46	-61.125	-60.6875	-60.5	-61.1875	-61.75	-61.8438	-61.9062	-61.9375	-62.875	-64.0312	-62.5	-63	-64.1562	-64.4062	-63.6875	-64.0312
		0.06	0.48	-61	-60.5312	-60.375	-61.0312	-61.625	-61.75	-61.7812	-61.9688	-62.75	-64.0312	-62.5312	-63	-64.0938	-64.4062	-63.5625	-63.9688
		0.06	0.5	-61	-60.5312	-60.3438	-61.0938	-61.625	-61.8438	-61.75	-61.8125	-62.6875	-64.0312	-62.4375	-63	-64.125	-64.2812	-63.5938	-64.0312
		0.06	0.52	-61	-60.5625	-60.25	-61.0938	-61.6562	-61.6875	-61.7812	-61.75	-62.6562	-63.9688	-62.4688	-62.9062	-64.0312	-64.3438	-63.5312	-63.9375
		0.06	0.54	-60.9375	-60.4688	-60.375	-61	-61.5625	-61.5938	-61.7188	-61.75	-62.6875	-63.9375	-62.4062	-62.9688	-64.0312	-64.1875	-63.5	-63.8438
		0.06	0.56	-60.8125	-60.4062	-60.3125	-61.0312	-61.5938	-61.5938	-61.625	-61.8125	-62.625	-63.875	-62.4688	-62.9062	-64.0312	-64.1562	-63.5312	-63.9375
		0.06	0.58	-60.7812	-60.4375	-60.25	-60.9375	-61.6562	-61.5938	-61.75	-61.7188	-62.5625	-63.9062	-62.375	-62.875	-63.875	-64.25	-63.5	-63.8125
		0.06	0.6	-60.8438	-60.375	-60.3125	-60.9062	-61.5938	-61.5938	-61.6875	-61.6875	-62.6562	-63.875	-62.25	-62.875	-63.9375	-64.1562	-63.5	-63.75
		0.06	0.62	-60.75	-60.375	-60.2188	-60.9375	-61.5	-61.5625	-61.5938	-61.6562	-62.5938	-63.7812	-62.2188	-62.8438	-63.9375	-64.0312	-63.4688	-63.8438
		0.06	0.64	-60.8125	-60.3438	-60.1875	-60.875	-61.4688	-61.4688	-61.6562	-61.6562	-62.5312	-63.875	-62.2812	-62.8125	-63.9062	-64.125	-63.3125	-63.8438
		0.06	0.66	-60.8438	-60.3125	-60.1562	-60.875	-61.5	-61.5312	-61.6562	-61.5625	-62.5312	-63.8125	-62.2812	-62.8125	-63.875	-64.1562	-63.3438	-63.6875
		0.06	0.68	-60.8438	-60.3125	-60.125	-60.8125	-61.4688	-61.5	-61.5938	-61.625	-62.5625	-63.7812	-62.2812	-62.875	-63.9062	-64.0625	-63.375	-63.8125
		0.06	0.7	-60.7188	-60.2188	-60.1562	-60.8438	-61.5312	-61.5	-61.625	-61.6562	-62.5312	-63.8125	-62.3438	-62.8125	-63.9062	-64.0938	-63.2812	-63.7812
		0.06	0.72	-60.75	-60.1875	-60.125	-60.875	-61.5	-61.5	-61.625	-61.5312	-62.5938	-63.75	-62.3438	-62.8438	-63.8125	-64.0312	-63.375	-63.625
		0.06	0.74	-60.75	-60.25	-60.2188	-60.8125	-61.3438	-61.4375	-61.5625	-61.6562	-62.5312	-63.7188	-62.1875	-62.8125	-63.8125	-64.0312	-63.4375	-63.75
		0.06	0.76	-60.8438	-60.25	-60.125	-60.75	-61.375	-61.5	-61.5	-61.625	-62.4688	-63.8125	-62.2812	-62.7812	-63.875	-64.0312	-63.4062	-63.6562
		0.06	0.78	-60.75	-60.2188	-60.0312	-60.7812	-61.4375	-61.5	-61.5	-61.625	-62.5	-63.8438	-62.375	-62.7812	-63.7812	-64.0938	-63.4062	-63.625
		0.06	0.8	-60.7188	-60.2188	-60.1875	-60.7188	-61.4375	-61.5	-61.5312	-61.625	-62.5	-63.7188	-62.2812	-62.75	-63.8125	-64.0625	-63.3125	-63.5938
		0.06	0.82	-60.7812	-60.1562	-60.1562	-60.75	-61.3438	-61.5	-61.4688	-61.625	-62.4062	-63.75	-62.3438	-62.7812	-63.9062	-64.0312	-63.3438	-63.6562
		0.06	0.84	-60.6562	-60.2188	-60.0938	-60.8125	-61.375	-61.5938	-61.5	-61.5	-62.4688	-63.75	-62.2812	-62.7188	-63.8438	-64.0938	-63.3125	-63.5625
		0.06	0.86	-60.7812	-60.25	-60.125	-60.7188	-61.4375	-61.5	-61.5	-61.5625	-62.5	-63.6562	-62.2188	-62.7188	-63.8438	-64.0312	-63.25	-63.625
		0.06	0.88	-60.7812	-60.0938	-60	-60.8438	-61.375	-61.5312	-61.5	-61.6562	-62.5312	-63.6875	-62.1875	-62.7188	-63.8438	-63.875	-63.2812	-63.625
		0.06	0.9	-60.6875	-60.1562	-60.0625	-60.7188	-61.3438	-61.5	-61.4688	-61.5312	-62.5	-63.7812	-62.2812	-62.8438	-63.75	-63.8438	-63.3438	-63.5312
		0.06	0.92	-60.7188	-60.0625	-60.125	-60.6562	-61.4062	-61.5	-61.375	-61.5312	-62.5312	-63.75	-62.2188	-62.75	-63.7188	-63.9375	-63.1562	-63.5
		0.06	0.94	-60.7188	-59.8438	-60.0312	-60.6562	-61.3438	-61.4688	-61.375	-61.5625	-62.3125	-63.6875	-62.3438	-62.7188	-63.75	-63.7812	-63.2188	-63.4688
		0.06	0.96	-60.625	-59.8438	-60	-60.5625	-61.3438	-61.4062	-61.3125	-61.4375	-62.25	-63.75	-62.1875	-62.6875	-63.7188	-63.6875	-63.125	-63.375
		0.06	0.98	-60.625	-59.7188	-59.8125	-60.5	-61.375	-61.3438	-61.1562	-61.375	-62.3125	-63.6562	-62.2812	-62.6562	-63.5938	-63.7812	-63	-63.3125
		0.06	1	-60.5938	-59.6562	-59.8125	-60.5625	-61.3125	-61.375	-61.1562	-61.375	-62.125	-63.5625	-62.1875	-62.5938	-63.5938	-63.625	-62.9062	-63.2812
		0.06	1.02	-60.5938	-59.6875	-59.7812	-60.5312	-61.3125	-61.3125	-61.2188	-61.375	-61.875	-63.5	-62.125	-62.5	-63.5625	-63.5	-62.8125	-63.2188
		0.06	1.04	-60.5625	-59.6875	-59.875	-60.5625	-61.4688	-61.3438	-61.1562	-61.2812	-61.875	-63.3125	-62.0312	-62.3125	-63.4062	-63.4688	-62.7812	-63.1562
		0.06	1.06	-60.5312	-59.75	-59.9688	-60.625	-61.5938	-61.4375	-61.2188	-61.3438	-61.6562	-63.2812	-62.125	-62.0938	-63.4062	-63.4062	-62.5938	-63.2188
		0.06	1.08	-60.5625	-59.875	-60.0625	-60.5938	-61.5625	-61.3125	-61.2812	-61.3125	-61.375	-63.3438	-62.0312	-62	-63.2812	-63.2812	-62.5312	-63.2188
		0.06	1.1	-60.4375	-59.8438	-60.0625	-60.625	-61.5625	-61.2188	-61.25	-61.1875	-61.1562	-63.2188	-62	-61.75	-63.1562	-63.25	-62.375	-63.2188
		0.06	1.12	-60.2188	-59.6875	-60.0625	-60.6562	-61.5	-61.0312	-61.1875	-61	-61	-63.125	-61.9375	-61.3438	-63.0625	-63.3125	-62.2812	-63.3125
		0.06	1.14	-60.0938	-59.6562	-60.0312	-60.4688	-61.1562	-60.75	-61.2812	-60.8438	-60.5625	-63.0938	-61.7188	-61	-62.875	-63.2188	-62.0312	-63.25
		0.06	1.16	-59.6875	-59.3125	-59.8125	-60.25	-60.875	-60.4375	-61.0938	-60.4375	-60.0625	-62.875	-61.5	-60.5938	-62.4688	-63.0625	-61.7188	-63.0625
		0.06	1.18	-59.2188	-59.0312	-59.7188	-59.9375	-60.5	-59.9688	-60.875	-60	-59.5625	-62.4375	-61.0938	-60.1875	-62.0625	-63	-61.25	-62.8125
		0.06	1.2	-58.7812	-58.4375	-59.3125	-59.375	-59.75	-59.375	-60.5625	-59.625	-58.875	-62.0625	-60.6875	-59.5	-61.5625	-62.8438	-60.625	-62.3438
		0.06	1.22	-58.0938	-57.8125	-58.6875	-58.8125	-59.1562	-58.7188	-60.125	-59.0625	-58.2188	-61.4375	-60.0625	-58.9375	-60.8438	-62.5312	-59.8125	-61.75
		0.06	1.24	-57.1875	-57.1875	-58.25	-58.0312	-58.4688	-57.8438	-59.4062	-58.4688	-57.4062	-60.6875	-59.4375	-58.3438	-60.0938	-62.1875	-59.0312	-61.1562
		0.06	1.26	-56.2812	-56.5	-57.5312	-57.2188	-57.5938	-57.125	-58.9062	-57.8438	-56.6562	-60.125	-58.625	-57.5	-59.2188	-61.8125	-58.1875	-60.5312
		0.06	1.28	-55.4375	-55.7812	-56.75	-56.4062	-56.6562	-56.2812	-58.125	-57.1562	-55.6875	-59.5	-57.75	-56.8125	-58.3125	-61.3125	-57.375	-59.75
		0.06	1.3	-54.5	-55	-56	-55.4688	-55.75	-55.4062	-57.3125	-56.4688	-55	-58.6875	-57.0312	-56.1875	-57.3125	-60.7188	-56.4688	-59.1562
		0.06	1.32	-53.5312	-54.1875	-55.1875	-54.625	-55	-54.5	-56.6562	-56.0312	-54.1562	-58.0312	-56.125	-55.4375	-56.375	-60.0625	-55.5625	-58.6562
		0.06	1.34	-52.6562	-53.2812	-54.2812	-53.875	-54.0312	-53.6562	-55.9688	-55.4375	-53.3438	-57.5312	-55.2812	-54.7188	-55.4375	-59.3438	-54.875	-58.0312
		0.06	1.36	-51.8125	-52.4375	-53.5938	-53.0938	-53.0938	-52.8125	-55.0938	-54.9688	-52.7188	-56.9062	-54.625	-54.25	-54.5625	-58.6875	-54.2188	-57.5
		0.06	1.38	-50.9688	-51.7188	-52.8125	-52.5	-52.375	-52.0938	-54.4375	-54.4375	-52.0938	-56.3438	-53.8125	-53.6875	-54	-58.0312	-53.5312	-57.0625
		0.06	1.4	-50.3438	-51	-52.125	-51.8125	-51.5625	-51.1875	-53.7812	-54.2188	-51.5312	-55.9688	-53.1562	-53.125	-53.2812	-57.5312	-52.875	-56.5938
		0.06	1.42	-49.6562	-50.4688	-51.5	-51.25	-50.7188	-50.4375	-53.1875	-53.9062	-51.0312	-55.5312	-52.5625	-52.6875	-52.6562	-57	-52.375	-56.2188
		0.06	1.44	-49.0625	-49.7812	-50.8125	-50.75	-50.0312	-49.6875	-52.6875	-53.625	-50.5938	-55.1562	-51.9375	-52.4375	-52.3125	-56.6562	-51.75	-55.875
		0.06	1.46	-48.5	-49.25	-50.3438	-50.3438	-49.4062	-48.8438	-52.3125	-53.4688	-50.0938	-55.0312	-51.5	-52.0625	-51.7812	-56.3125	-51.375	-55.625
		0.06	1.48	-47.875	-48.75	-49.8438	-49.9688	-48.4688	-47.9062	-51.8438	-53.375	-49.6562	-54.9062	-51.1875	-51.7812	-51.4375	-56	-50.9062	-55.2188
		0.06	1.5	-47	-48.3125	-49.4062	-49.6875	-47.0938	-46.1875	-51.5	-53.125	-49.375	-54.625	-50.8438	-51.5625	-51.1875	-55.6562	-50.4375	-55
		0.06	1.52	-45.3125	-47.875	-49.0625	-49.4375	-44.6562	-43.4062	-51.3438	-53.0938	-49.0312	-54.6562	-50.4688	-51.375	-50.9688	-55.5625	-50.0938	-54.875
		0.06	1.54	-42.6875	-47.2812	-48.6875	-49.25	-41	-39.4375	-51	-53	-48.7812	-54.5312	-50.2812	-51.2188	-50.5312	-55.4375	-49.75	-54.5938
		0.06	1.56	-38.6562	-46	-48.4375	-49.125	-36.0312	-34.1875	-50.7812	-52.8438	-48.5938	-54.5	-50.1562	-51.0625	-50.5	-55.2188	-49.4062	-54.4688
		0.06	1.58	-33.2812	-44.0312	-48.1562	-49.0312	-29.3438	-26.875	-50.5938	-52.7812	-48.4688	-54.5938	-49.75	-50.9375	-50.2188	-55.1562	-48.75	-54.4375
		0.06	1.6	-26	-40.6562	-47.7812	-48.875	-20.5625	-17.8438	-50.4062	-52.7188	-48.125	-54.625	-49.5938	-50.8125	-49.9375	-55.0312	-47.3125	-54.2188
		0.06	1.62	-16.9688	-36.0312	-47.1875	-48.8125	-11.1562	-8.53125	-50.2812	-52.5312	-47.8125	-54.6562	-49.625	-50.6562	-49.75	-55	-44.875	-54.125
		0.06	1.64	-7.46875	-30	-46	-48.75	-2.46875	-0.3125	-50.1875	-52.5	-47.5312	-54.5625	-49.4375	-50.5625	-49.4062	-54.875	-41.0938	-54.1562
		0.06	1.66	1.125	-21.7812	-43.6562	-48.6875	4.3125	5.84375	-50.0938	-52.5	-46.6562	-54.75	-49.25	-50.5312	-48.375	-55	-36.0312	-54.0312
		0.06	1.68	7.5625	-12.4375	-40.2188	-48.8125	8.5	9.0625	-49.875	-52.375	-44.6562	-54.8125	-49.1875	-50.5312	-46.4375	-54.9688	-29.3438	-54.0625
		0.06	1.7	11.25	-3.28125	-35.5	-48.7188	9.5625	9.3125	-49.8125	-52.2812	-41.625	-54.8438	-48.9688	-50.4062	-43.4062	-54.9375	-20.4688	-54.1562
		0.06	1.72	11.6562	4.5	-29.1562	-48.8438	7.84375	6.9375	-49.7812	-52.1562	-37.125	-55	-48.875	-50.4062	-39.0625	-54.9688	-10.7188	-54.1562
		0.06	1.74	9.4375	9.71875	-21	-48.9062	4.03125	2.65625	-49.7812	-52.0625	-31.1562	-55.0625	-49	-50.5312	-33.3438	-55.0312	-1.59375	-54.1562
		0.06	1.76	4.90625	11.8125	-11.4688	-48.9375	-1.375	-3.09375	-49.6562	-51.9375	-23.1875	-55.0938	-48.8125	-50.5312	-25.7812	-55.0625	5.375	-54.3125
		0.06	1.78	-1.0625	11.0312	-2.4375	-48.9375	-7.8125	-9.6875	-49.625	-51.8438	-13.5	-55.0938	-48.7812	-50.5625	-16.4688	-55.125	9.75	-54.3125
		0.06	1.8	-8.03125	7.75	4.9375	-49.125	-14.7812	-16.5625	-49.5	-51.7812	-3.46875	-55.25	-48.75	-50.625	-6.90625	-55.0938	11	-54.4062
		0.06	1.82	-15.1875	2.5	10.0625	-49.125	-21.5938	-23.4688	-49.4688	-51.6562	5.15625	-55.1562	-48.6875	-50.7812	1.40625	-55.125	9.21875	-54.4062
		0.06	1.84	-22.4062	-3.84375	11.8438	-49.25	-28.0312	-29.9062	-49.4688	-51.5312	11.125	-55.2812	-48.5312	-50.75	7.5	-55.125	5.1875	-54.4688
		0.06	1.86	-29	-10.9688	10.75	-49.5	-33.875	-35.4375	-49.5	-51.4688	14.0312	-55.375	-48.5	-50.8438	10.5312	-55.2812	-0.5	-54.5
		0.06	1.88	-34.875	-18.3125	7.3125	-49.4688	-39	-40.4062	-49.375	-51.375	13.6562	-55.375	-48.5	-51	10.5	-55.3438	-7.28125	-54.5625
		0.06	1.9	-40.0312	-25.1562	1.90625	-49.5938	-43.375	-44.5938	-49.4062	-51.2188	10.375	-55.5	-48.5	-51.1562	7.6875	-55.4688	-14.4688	-54.6562
		0.06	1.92	-44.2812	-31.4688	-4.65625	-49.8125	-47.1875	-48.0625	-49.4375	-51.1875	4.9375	-55.625	-48.5312	-51.1562	2.90625	-55.5	-21.7188	-54.6562
		0.06	1.94	-47.7812	-36.9688	-11.8438	-49.875	-50.2812	-50.9688	-49.375	-51.1562	-1.84375	-55.6875	-48.5312	-51.4062	-3.21875	-55.5938	-28.5	-54.7188
		0.06	1.96	-50.8125	-41.625	-19.0625	-50.0312	-52.7188	-53.4375	-49.4062	-51.0938	-9.375	-55.75	-48.5625	-51.4688	-10.3438	-55.6562	-34.5312	-54.7188
		0.06	1.98	-53.2188	-45.6875	-25.9062	-50.1562	-54.875	-55.3438	-49.4062	-51.0312	-17.1875	-55.875	-48.625	-51.5312	-17.5938	-55.6875	-39.8438	-54.875
		0.06	2	-55.0938	-49	-32.0312	-50.3438	-56.5938	-56.875	-49.4062	-51.1562	-24.4688	-56.0938	-48.7188	-51.6562	-24.6562	-55.8438	-44.4375	-54.9375
		0.06	2.02	-56.6562	-51.7188	-37.4375	-50.4375	-57.875	-58.1875	-49.5	-51.0938	-31.1562	-56.0312	-48.8438	-51.9062	-31.1562	-55.9062	-48.1562	-55
		0.06	2.04	-57.875	-53.9688	-42.0625	-50.5625	-59	-59.0938	-49.5938	-51.0938	-37.0938	-56.1875	-48.9375	-52	-36.9062	-55.9062	-51.3438	-55.0625
		0.06	2.06	-58.9062	-55.7188	-45.9375	-50.5938	-59.875	-59.9375	-49.5312	-51.0625	-42.0938	-56.2812	-49.0625	-52.2812	-41.9062	-55.9375	-53.7812	-55.1562
		0.06	2.08	-59.5	-57.1875	-49.1562	-50.75	-60.5312	-60.5312	-49.625	-51.2188	-46.2812	-56.2812	-49.0938	-52.375	-46.1875	-56.125	-55.9062	-55.1875
		0.06	2.1	-60.1875	-58.3438	-51.75	-50.9062	-61	-61	-49.7188	-51.1562	-49.5938	-56.4375	-49.2812	-52.5	-49.5938	-56.1875	-57.6562	-55.4375
		0.06	2.12	-60.7188	-59.1875	-53.9062	-50.9375	-61.4062	-61.4375	-49.8125	-51.2812	-52.5	-56.5938	-49.5	-52.5625	-52.5312	-56.1875	-59.0625	-55.5
		0.06	2.14	-61.0938	-59.8438	-55.75	-51.0625	-61.6875	-61.6875	-49.875	-51.3125	-54.5625	-56.6562	-49.5312	-52.75	-54.9375	-56.3438	-60.0312	-55.5938
		0.06	2.16	-61.25	-60.4688	-56.9375	-51.1875	-62	-61.7812	-49.9688	-51.4062	-56.2812	-56.75	-49.6562	-52.9062	-56.75	-56.5	-60.9375	-55.7188
		0.06	2.18	-61.4375	-60.875	-58.1875	-51.25	-62.1562	-61.9688	-50.1562	-51.4688	-57.7812	-56.875	-49.875	-53	-58.3125	-56.5	-61.625	-55.8125
		0.06	2.2	-61.5312	-61.0938	-58.9375	-51.375	-62.2812	-62.0938	-50.2188	-51.5625	-58.875	-57.0625	-50	-53.1562	-59.625	-56.6562	-62.0625	-55.9062
		0.06	2.22	-61.5938	-61.3125	-59.4375	-51.4688	-62.4062	-62.0625	-50.3438	-51.7188	-59.6875	-57.2188	-50.125	-53.2812	-60.5625	-56.8125	-62.5625	-56.0312
		0.06	2.24	-61.6562	-61.4062	-59.875	-51.4688	-62.3438	-62.2188	-50.4375	-51.7812	-60.4375	-57.3438	-50.25	-53.4688	-61.375	-56.8438	-62.9375	-56.1562
		0.06	2.26	-61.6875	-61.375	-60.2812	-51.5625	-62.4375	-62.1875	-50.5	-51.9375	-61	-57.4688	-50.5312	-53.625	-61.9375	-56.9375	-63.1562	-56.2812
		0.06	2.28	-61.625	-61.5312	-60.5	-51.5625	-62.4375	-62.2188	-50.625	-52.0938	-61.3438	-57.4688	-50.6562	-53.7188	-62.4688	-57	-63.2188	-56.4062
		0.06	2.3	-61.625	-61.4688	-60.6562	-51.6562	-62.4062	-62.2188	-50.8125	-52.0625	-61.6562	-57.6562	-50.8438	-53.75	-62.75	-57.2188	-63.4688	-56.625
		0.06	2.32	-61.6562	-61.4375	-60.6875	-51.7812	-62.4062	-62.1562	-50.9375	-52.1875	-61.8438	-57.6875	-51	-53.9688	-63.0938	-57.2812	-63.5	-56.7188
		0.06	2.34	-61.5625	-61.4688	-60.6562	-51.8438	-62.4375	-62.2188	-51.0625	-52.375	-62.0312	-57.7812	-51.125	-54.125	-63.4375	-57.3438	-63.5625	-56.8125
		0.06	2.36	-61.3438	-61.3125	-60.5938	-51.9688	-62.375	-62.1875	-51.1875	-52.4375	-62.0625	-57.9375	-51.3438	-54.25	-63.4375	-57.5	-63.7188	-56.875
		0.06	2.38	-61.3438	-61.2188	-60.5625	-52.0625	-62.4062	-62.1562	-51.3438	-52.5312	-62.2188	-58.1562	-51.4375	-54.4375	-63.5938	-57.5938	-63.5938	-57.0938
		0.06	2.4	-61.2812	-61.3125	-60.4375	-52.0625	-62.4375	-62.1562	-51.5	-52.5938	-62.3438	-58.1562	-51.5312	-54.5625	-63.7188	-57.625	-63.6875	-57.125
		0.06	2.42	-61.1875	-61.125	-60.4688	-52.1875	-62.4375	-62.2188	-51.6562	-52.7188	-62.3125	-58.2812	-51.7188	-54.5938	-63.7188	-57.875	-63.75	-57.2812
		0.06	2.44	-61.0312	-61	-60.4688	-52.4688	-62.4375	-62.125	-51.75	-52.7812	-62.3125	-58.4062	-51.9062	-54.8438	-63.7812	-57.875	-63.8125	-57.4062
		0.06	2.46	-60.9375	-61.0938	-60.3438	-52.4688	-62.4062	-62.1875	-51.875	-53	-62.375	-58.5	-52.0312	-54.9062	-63.9062	-57.9062	-63.8438	-57.4375
		0.06	2.48	-60.8438	-60.9375	-60.3125	-52.5	-62.4375	-62.2188	-52	-53.125	-62.4688	-58.5	-52.1562	-55.0312	-63.9062	-58.0625	-63.7812	-57.5625
		0.06	2.5	-60.6562	-60.9375	-60.2812	-52.625	-62.4688	-62	-52.2188	-53.1875	-62.4062	-58.5938	-52.4375	-55.125	-63.875	-58.1875	-63.75	-57.75
		0.06	2.52	-60.5	-60.9688	-60.2812	-52.6875	-62.4062	-62.0938	-52.25	-53.3438	-62.4688	-58.7188	-52.5	-55.1875	-63.9375	-58.3125	-63.9062	-57.7812
		0.06	2.54	-60.5	-60.875	-60.25	-52.7812	-62.4062	-62.1562	-52.4062	-53.375	-62.4375	-58.8438	-52.7188	-55.3125	-63.875	-58.4688	-63.8438	-57.875
		0.06	2.56	-60.3438	-60.8125	-60.1562	-52.9062	-62.5	-62.0938	-52.6562	-53.5312	-62.375	-58.8125	-52.9062	-55.4688	-63.9062	-58.5312	-63.75	-58.0312
		0.06	2.58	-60.2188	-60.8125	-60.0625	-53	-62.5	-62.1562	-52.6562	-53.5625	-62.25	-59	-52.9375	-55.5	-63.875	-58.625	-63.7812	-58.0938
		0.06	2.6	-60.2812	-60.8125	-60.0938	-53.0938	-62.5	-62.25	-52.6875	-53.7188	-62.3438	-59.0625	-53.0938	-55.625	-63.9375	-58.6562	-63.9062	-58.1875
		0.06	2.62	-60.1875	-60.7188	-60.0625	-53.1562	-62.5625	-62.1875	-52.8438	-53.9688	-62.4062	-59.0312	-53.2188	-55.7188	-63.9062	-58.75	-63.7812	-58.2812
		0.06	2.64	-60	-60.7188	-60.1562	-53.1562	-62.5625	-62.2812	-53.0312	-53.875	-62.375	-59.1562	-53.4062	-55.6875	-63.875	-58.8438	-63.8438	-58.4375
		0.06	2.66	-59.9375	-60.8125	-60.0938	-53.375	-62.5625	-62.2812	-53.0938	-54	-62.4062	-59.2188	-53.5	-55.8125	-64.0312	-59	-63.8438	-58.5
		0.06	2.68	-60.0938	-60.7812	-60.0312	-53.4688	-62.5625	-62.3125	-53.1562	-54.125	-62.4688	-59.1875	-53.6562	-56.0625	-64.0312	-59.1562	-63.875	-58.5625
		0.06	2.7	-59.9375	-60.9062	-60.0625	-53.5	-62.6875	-62.2812	-53.3438	-54.2188	-62.4375	-59.2812	-53.6875	-56.125	-63.9375	-59.25	-64.0312	-58.6562
		0.06	2.72	-59.9375	-60.9688	-60.0938	-53.6562	-62.6562	-62.4688	-53.5312	-54.3438	-62.5	-59.4688	-53.7812	-56.2188	-64.0312	-59.3125	-64.0312	-58.7188
		0.06	2.74	-60.0312	-60.75	-60.0312	-53.75	-62.7188	-62.3438	-53.5625	-54.4688	-62.5	-59.5	-53.9062	-56.3125	-64.0312	-59.2812	-64.0312	-58.7812
		0.06	2.76	-60.0312	-60.9062	-60.125	-53.8125	-62.75	-62.4375	-53.6562	-54.5625	-62.5625	-59.5	-54.0938	-56.4062	-64.0312	-59.375	-64.0312	-58.8438
		0.06	2.78	-60.0312	-60.9375	-60.125	-53.8125	-62.8125	-62.4688	-53.8125	-54.6562	-62.5	-59.5938	-54.1875	-56.4688	-64.0625	-59.5	-64.0625	-58.9375
		0.06	2.8	-60.0938	-60.9375	-60.125	-54	-62.6875	-62.4688	-53.875	-54.6562	-62.5938	-59.5625	-54.3438	-56.5938	-64.125	-59.5312	-64.0312	-58.875
		0.06	2.82	-60.0938	-61	-60.2188	-54.1562	-62.9375	-62.5312	-54.0312	-54.8125	-62.625	-59.625	-54.4688	-56.5625	-64.1562	-59.5312	-64.1562	-59
		0.06	2.84	-60.1562	-61.125	-60.1875	-54.25	-62.9688	-62.5312	-54.1562	-54.8125	-62.7188	-59.75	-54.5938	-56.6562	-64.25	-59.6875	-64.1875	-59.1562
		0.06	2.86	-60.125	-61.0312	-60.2812	-54.1562	-63.0312	-62.5	-54.125	-54.9062	-62.75	-59.75	-54.5625	-56.6875	-64.3438	-59.7188	-64.1562	-59.1562
		0.06	2.88	-60.25	-61.1875	-60.3125	-54.3438	-63.0625	-62.625	-54.1875	-54.9062	-62.875	-59.875	-54.6875	-56.75	-64.2812	-59.8125	-64.2812	-59.2188
		0.06	2.9	-60.2188	-61.2188	-60.375	-54.3438	-63.0938	-62.6875	-54.4062	-54.9688	-62.9375	-59.875	-54.9062	-56.9688	-64.3438	-59.8438	-64.3125	-59.3438
		0.06	2.92	-60.375	-61.2188	-60.4062	-54.5	-63.125	-62.6875	-54.4688	-55.1875	-62.9062	-60.0938	-54.9062	-57	-64.4062	-60	-64.3438	-59.4375
		0.06	2.94	-60.4688	-61.2188	-60.4688	-54.5625	-63.1562	-62.8438	-54.5312	-55.1562	-62.9375	-60.0312	-55.0938	-57.0312	-64.4062	-59.9688	-64.3438	-59.4375
		0.06	2.96	-60.5	-61.4062	-60.4688	-54.5	-63.1875	-62.9375	-54.6875	-55.3125	-63.0625	-60.0312	-55.0625	-57.0938	-64.3438	-59.9688	-64.4688	-59.5
		0.06	2.98	-60.5	-61.4062	-60.5	-54.75	-63.2812	-62.9062	-54.8438	-55.3438	-63.0625	-60.0938	-55.1562	-57.0938	-64.5	-60.1562	-64.375	-59.625
		0.06	3	-60.5938	-61.4062	-60.5938	-54.7812	-63.2188	-63	-54.7812	-55.4062	-63.0625	-60.125	-55.3438	-57.1562	-64.5312	-60.1875	-64.5312	-59.6875
		0.06	3.02	-60.625	-61.5	-60.5938	-54.75	-63.375	-63.0938	-54.8438	-55.5312	-63.1875	-60.0938	-55.375	-57.3438	-64.5312	-60.1562	-64.5312	-59.6562
		0.06	3.04	-60.6562	-61.4688	-60.625	-54.875	-63.4688	-63.0312	-54.9688	-55.5938	-63.1875	-60.25	-55.4688	-57.4062	-64.5938	-60.2188	-64.5312	-59.8125
		0.06	3.06	-60.7812	-61.5625	-60.8438	-55	-63.4688	-63.1875	-55	-55.6562	-63.2188	-60.2812	-55.4375	-57.4062	-64.625	-60.2812	-64.5625	-59.8438
		0.06	3.08	-60.6875	-61.6562	-60.8438	-54.9375	-63.4688	-63.3438	-55.1562	-55.6875	-63.25	-60.2812	-55.6562	-57.5	-64.625	-60.25	-64.5625	-59.9062
		0.06	3.1	-60.8438	-61.625	-60.8125	-55.0938	-63.5625	-63.3438	-55.2188	-55.7812	-63.4375	-60.25	-55.5938	-57.5938	-64.6875	-60.4375	-64.5625	-59.8125
		0.06	3.12	-61	-61.6562	-60.9688	-55.125	-63.5625	-63.3438	-55.2812	-55.8438	-63.375	-60.375	-55.625	-57.5938	-64.8125	-60.4062	-64.75	-60.0312
		0.06	3.14	-61.0938	-61.875	-60.9688	-55.0938	-63.5938	-63.5	-55.3438	-55.9375	-63.4688	-60.4375	-55.875	-57.5312	-64.8438	-60.4375	-64.8438	-59.9688
		0.06	3.16	-61.0625	-61.8125	-61	-55.2812	-63.6875	-63.4062	-55.3438	-56.0312	-63.5	-60.4375	-55.9688	-57.7188	-64.8438	-60.5	-64.8125	-60.0312
		0.06	3.18	-61.1562	-61.8125	-61.0938	-55.4062	-63.7812	-63.5	-55.5312	-56.125	-63.5625	-60.4688	-55.9688	-57.7812	-64.9375	-60.4688	-64.875	-60.1562
		0.06	3.2	-61.1875	-61.9375	-61.1562	-55.3125	-63.7812	-63.5312	-55.5625	-56.1562	-63.5625	-60.5	-56.125	-57.8438	-65	-60.5312	-64.9062	-60.125
		0.06	3.22	-61.25	-62	-61.0938	-55.5	-63.7812	-63.5	-55.5938	-56.2188	-63.625	-60.5312	-56.2188	-57.875	-64.9375	-60.5312	-64.875	-60.1562
		0.06	3.24	-61.375	-62	-61.2188	-55.5312	-63.9062	-63.625	-55.75	-56.2188	-63.6875	-60.5312	-56.25	-58.0312	-65	-60.625	-65	-60.25
		0.06	3.26	-61.3125	-62.0312	-61.2812	-55.5	-63.9062	-63.625	-55.7812	-56.2812	-63.6875	-60.625	-56.3125	-57.9375	-65.0938	-60.7188	-65	-60.3125
		0.06	3.28	-61.4375	-62	-61.3438	-55.5938	-63.9375	-63.6875	-55.75	-56.3125	-63.7812	-60.7188	-56.4375	-58.125	-65.1562	-60.7188	-64.9688	-60.2812
		0.06	3.3	-61.5625	-62.25	-61.4062	-55.5938	-63.875	-63.7812	-55.9375	-56.375	-63.9062	-60.7188	-56.4375	-58.125	-65.0938	-60.8438	-65.0312	-60.4062
		0.06	3.32	-61.5938	-62.1875	-61.5	-55.625	-64.0312	-63.7812	-56	-56.4688	-63.875	-60.6875	-56.4375	-58.1562	-65.2812	-60.7188	-65.1875	-60.4062
		0.06	3.34	-61.625	-62.3125	-61.5625	-55.7812	-64.0938	-63.8125	-56.0625	-56.4688	-64.0312	-60.8438	-56.5312	-58.2188	-65.25	-60.8438	-65.1562	-60.4375
		0.06	3.36	-61.7188	-62.3125	-61.625	-55.9375	-64.125	-63.875	-56.0625	-56.5938	-64.0312	-60.7812	-56.5938	-58.2188	-65.25	-60.9375	-65.1875	-60.4375
		0.06	3.38	-61.75	-62.375	-61.6875	-55.9062	-64.1562	-63.9375	-56.1875	-56.6562	-64.1562	-60.8438	-56.5938	-58.3438	-65.3125	-60.9062	-65.3438	-60.5312
		0.06	3.4	-61.8125	-62.4375	-61.7188	-55.9375	-64.25	-64.0312	-56.2812	-56.6562	-64.1875	-60.8438	-56.6562	-58.3438	-65.375	-60.9688	-65.3125	-60.5625
		0.06	3.42	-62	-62.4688	-61.875	-56	-64.25	-64.0312	-56.2188	-56.6875	-64.1562	-60.8438	-56.6875	-58.4062	-65.3125	-61	-65.3438	-60.5625
		0.06	3.44	-61.9375	-62.5312	-61.9375	-56	-64.2812	-64.0312	-56.3438	-56.8125	-64.2188	-60.875	-56.75	-58.4375	-65.3125	-61	-65.4062	-60.5938
		0.06	3.46	-62.0625	-62.6562	-61.9375	-56.1562	-64.3438	-64.0312	-56.4375	-56.8438	-64.3125	-60.9062	-56.875	-58.5312	-65.4688	-61.0625	-65.4062	-60.75
		0.06	3.48	-62.0625	-62.6562	-62.0312	-56.1875	-64.4062	-64.1562	-56.4062	-56.8438	-64.3125	-61	-57.0312	-58.5625	-65.5	-61.2188	-65.4062	-60.6875
		0.06	3.5	-62.0938	-62.75	-62.1562	-56.1875	-64.3438	-64.0938	-56.5	-56.875	-64.4062	-61	-57.0312	-58.6562	-65.4688	-61.1562	-65.5312	-60.625
		0.06	3.52	-62.2812	-62.75	-62.1562	-56.25	-64.4688	-64.2188	-56.5312	-57.0312	-64.4375	-60.9688	-57.0625	-58.5312	-65.5	-61.1562	-65.5	-60.7188
		0.06	3.54	-62.3438	-62.8125	-62.25	-56.3438	-64.5	-64.2812	-56.5	-57	-64.5938	-61.0312	-57.1875	-58.5625	-65.5312	-61.2812	-65.5	-60.7812
		0.06	3.56	-62.2188	-62.8438	-62.3438	-56.2812	-64.5625	-64.2812	-56.5625	-56.9688	-64.5938	-61.0938	-57.125	-58.6562	-65.5312	-61.25	-65.6562	-60.8438
		0.06	3.58	-62.4688	-62.875	-62.3125	-56.25	-64.5625	-64.3438	-56.5938	-57.0312	-64.625	-61.0625	-57.1875	-58.7188	-65.5938	-61.2812	-65.6562	-60.875
		0.06	3.6	-62.4375	-62.9688	-62.3438	-56.3438	-64.75	-64.4375	-56.6562	-57.0312	-64.7812	-61.0625	-57.25	-58.7188	-65.7188	-61.2812	-65.7188	-60.875
		0.06	3.62	-62.4688	-63	-62.4688	-56.4688	-64.625	-64.4375	-56.7188	-57.0625	-64.75	-61.1562	-57.3438	-58.75	-65.6875	-61.25	-65.7812	-60.875
		0.06	3.64	-62.6562	-63	-62.5	-56.375	-64.6562	-64.4375	-56.7812	-57.125	-64.75	-61.1562	-57.3438	-58.8125	-65.7812	-61.375	-65.6875	-60.9375
		0.06	3.66	-62.625	-63	-62.5	-56.4375	-64.7812	-64.5	-56.8125	-57.1562	-64.7812	-61.1562	-57.4688	-58.875	-65.8438	-61.3438	-65.75	-60.9375
		0.06	3.68	-62.7188	-63.0625	-62.5625	-56.5312	-64.7188	-64.5625	-56.8438	-57.25	-64.9062	-61.25	-57.5312	-58.875	-65.8125	-61.375	-65.8438	-61
		0.06	3.7	-62.7188	-63.1562	-62.5312	-56.5312	-64.7188	-64.5	-56.8438	-57.1875	-64.9688	-61.25	-57.5	-58.9688	-65.9062	-61.4375	-65.7812	-60.9375
		0.06	3.72	-62.8125	-63.125	-62.7188	-56.5938	-64.8125	-64.6562	-56.9375	-57.2812	-64.9688	-61.1562	-57.5	-59	-65.9688	-61.4688	-65.9062	-61
		0.06	3.74	-62.875	-63.1875	-62.7188	-56.6562	-64.7812	-64.6562	-56.9062	-57.375	-64.9688	-61.2188	-57.625	-59.0312	-66.0625	-61.4375	-65.9062	-61.0625
		0.06	3.76	-62.9688	-63.2812	-62.75	-56.5625	-64.8125	-64.6875	-56.9375	-57.3438	-65.0625	-61.1875	-57.6562	-59.0312	-66.0312	-61.5	-66	-61.0625
		0.06	3.78	-63.0312	-63.3125	-62.875	-56.6562	-64.9062	-64.75	-57.0312	-57.4688	-65.0938	-61.25	-57.5938	-59.1562	-66.1562	-61.4688	-65.9688	-61.0938
		0.06	3.8	-63.0312	-63.3125	-62.9375	-56.7188	-64.9688	-64.8438	-57.0312	-57.5312	-65.25	-61.2812	-57.6875	-59.0938	-66.1875	-61.5312	-66.0938	-61.1875
		0.06	3.82	-63.0312	-63.375	-62.9062	-56.7188	-64.9688	-64.8125	-57.125	-57.5	-65.2188	-61.3125	-57.6875	-59.125	-66.125	-61.625	-66.0938	-61.1562
		0.06	3.84	-63.125	-63.4375	-62.9688	-56.7812	-64.9688	-64.875	-57.125	-57.5	-65.2188	-61.3438	-57.6562	-59.25	-66.2188	-61.5312	-66.0312	-61.1875
		0.06	3.86	-63.1875	-63.4062	-63.0312	-56.7812	-65.0312	-64.9375	-57.125	-57.5938	-65.25	-61.3125	-57.7188	-59.1562	-66.3125	-61.5938	-66.125	-61.2188
		0.06	3.88	-63.2812	-63.4688	-63.0312	-56.75	-65.0312	-64.9688	-57.2188	-57.5938	-65.4062	-61.3125	-57.7812	-59.25	-66.3125	-61.625	-66.1875	-61.25
		0.06	3.9	-63.1875	-63.5938	-63.125	-56.9062	-65.0938	-65.0312	-57.1562	-57.5938	-65.3438	-61.4062	-57.8125	-59.25	-66.2812	-61.7188	-66.1562	-61.2188
		0.06	3.92	-63.25	-63.5938	-63.2188	-56.875	-65.0625	-65	-57.2188	-57.6562	-65.4062	-61.4688	-57.9062	-59.2188	-66.375	-61.7188	-66.2812	-61.2188
		0.06	3.94	-63.2812	-63.5938	-63.2812	-56.9062	-65.0938	-65	-57.3125	-57.7188	-65.5	-61.3438	-57.9688	-59.3125	-66.375	-61.6562	-66.3125	-61.375
		0.06	3.96	-63.2812	-63.6875	-63.3125	-56.9062	-65.25	-65	-57.3438	-57.625	-65.4688	-61.4688	-57.9375	-59.3125	-66.4062	-61.7188	-66.3438	-61.3438
		0.06	3.98	-63.375	-63.6562	-63.3438	-56.9688	-65.2188	-65.0938	-57.375	-57.6875	-65.4688	-61.4688	-57.9688	-59.3438	-66.4688	-61.75	-66.3438	-61.3438
		0.06	4	-63.4375	-63.7812	-63.3125	-57	-65.25	-65.0625	-57.4375	-57.7812	-65.5312	-61.5	-58.0625	-59.375	-66.5	-61.7188	-66.5	-61.4375
		0.06	4.02	-63.5312	-63.75	-63.3438	-56.9375	-65.3438	-65.125	-57.4375	-57.7812	-65.5625	-61.5	-58.1562	-59.375	-66.5312	-61.7812	-66.4062	-61.4688
		0.06	4.04	-63.5312	-63.7812	-63.5625	-57.0938	-65.3125	-65.2188	-57.5	-57.8125	-65.5938	-61.5625	-58.1562	-59.4375	-66.5312	-61.7812	-66.4375	-61.375
		0.06	4.06	-63.5312	-63.8438	-63.5	-57	-65.375	-65.2812	-57.5312	-57.9062	-65.6875	-61.5	-58.0938	-59.4688	-66.5625	-61.6875	-66.5625	-61.4375
		0.06	4.08	-63.6562	-64.0312	-63.5	-57.0938	-65.4375	-65.1562	-57.5938	-57.8438	-65.75	-61.5	-58.1562	-59.4062	-66.5625	-61.875	-66.5312	-61.4375
		0.06	4.1	-63.7188	-64.0312	-63.625	-57.0625	-65.4688	-65.3438	-57.5938	-57.8125	-65.6875	-61.5312	-58.2188	-59.4688	-66.6562	-61.8438	-66.5	-61.5
		0.06	4.12	-63.6875	-64.0312	-63.5	-57.1875	-65.4062	-65.3438	-57.6562	-57.9062	-65.6875	-61.5	-58.2188	-59.5312	-66.6875	-61.8438	-66.6562	-61.4688
		0.06	4.14	-63.7812	-64.0312	-63.5938	-57.0938	-65.4375	-65.4062	-57.7812	-57.9375	-65.875	-61.5625	-58.2188	-59.5312	-66.8125	-61.9375	-66.625	-61.4375
		0.06	4.16	-63.75	-64.0625	-63.7188	-57.1875	-65.4688	-65.4688	-57.75	-57.9375	-65.9375	-61.5312	-58.4062	-59.5	-66.7188	-61.8438	-66.6875	-61.5
		0.06	4.18	-63.75	-64.0312	-63.6875	-57.3125	-65.5625	-65.4375	-57.7188	-58	-65.9062	-61.625	-58.3438	-59.5938	-66.75	-61.9375	-66.625	-61.5
		0.06	4.2	-63.8438	-64.0938	-63.8125	-57.1562	-65.5625	-65.4688	-57.8438	-58	-65.9375	-61.5938	-58.375	-59.5	-66.7812	-61.9062	-66.7188	-61.5
		0.06	4.22	-63.875	-64.1562	-63.7812	-57.1562	-65.5938	-65.5	-57.8438	-58	-66.0312	-61.5312	-58.5	-59.6562	-66.875	-61.8125	-66.6562	-61.5
		0.06	4.24	-63.9375	-64.0938	-63.875	-57.1875	-65.625	-65.5	-57.7188	-58.1562	-65.9375	-61.5312	-58.5	-59.7188	-66.875	-61.9375	-66.8125	-61.5312
		0.06	4.26	-64.0312	-64.2188	-63.9062	-57.2812	-65.625	-65.5	-57.8438	-58.0938	-66.125	-61.6562	-58.5	-59.5312	-66.9062	-61.9375	-66.8125	-61.5312
		0.06	4.28	-64.0312	-64.2812	-64.0312	-57.2188	-65.6562	-65.625	-57.8125	-58.125	-66.1562	-61.5625	-58.5625	-59.6562	-66.9375	-61.8438	-66.8125	-61.5312
		0.06	4.3	-64.0938	-64.25	-64.0312	-57.25	-65.7188	-65.5625	-57.875	-58.25	-66.0938	-61.5312	-58.5938	-59.7812	-66.9375	-61.9688	-66.8438	-61.625
		0.06	4.32	-64.125	-64.3125	-64.0312	-57.3125	-65.6562	-65.7812	-57.9062	-58.1562	-66.1875	-61.5625	-58.5312	-59.75	-67	-61.9375	-66.875	-61.5
		0.06	4.34	-64.125	-64.4062	-64.1562	-57.3125	-65.7812	-65.75	-58	-58.0938	-66.1875	-61.6562	-58.5938	-59.7812	-67	-61.9375	-66.875	-61.5625
		0.06	4.36	-64.1875	-64.375	-64.1875	-57.3438	-65.7812	-65.7188	-58.0312	-58.2188	-66.1562	-61.5625	-58.6875	-59.7812	-67.0625	-61.9375	-66.9688	-61.5625
		0.06	4.38	-64.1875	-64.3438	-64.125	-57.3125	-65.7812	-65.7188	-57.9688	-58.125	-66.25	-61.625	-58.6875	-59.7188	-67.0312	-62	-66.9688	-61.6562
		0.06	4.4	-64.1562	-64.4688	-64.2188	-57.2188	-65.7812	-65.7812	-58.0312	-58.1562	-66.2812	-61.6562	-58.7188	-59.8125	-67.0938	-61.9688	-67.0312	-61.6562
		0.06	4.42	-64.2812	-64.4688	-64.1875	-57.1875	-65.8438	-65.8438	-58.1562	-58.2812	-66.2812	-61.6562	-58.75	-59.875	-67.0938	-62	-67	-61.7812
		0.06	4.44	-64.2812	-64.4375	-64.25	-57.2188	-65.7812	-65.7812	-58.0938	-58.25	-66.375	-61.5938	-58.7188	-59.8438	-67.0625	-61.9688	-67.0625	-61.7188
		0.06	4.46	-64.25	-64.5625	-64.2812	-57.3438	-65.9062	-65.7812	-58.1562	-58.3438	-66.4375	-61.625	-58.75	-59.875	-67.0938	-62	-67.1562	-61.7188
		0.06	4.48	-64.3438	-64.5938	-64.1875	-57.2812	-65.9062	-65.875	-58.125	-58.3438	-66.4375	-61.6562	-58.7812	-59.9375	-67.1562	-62.0312	-67.0938	-61.7812
		0.06	4.5	-64.4375	-64.5938	-64.25	-57.3438	-65.9062	-65.8438	-58.1875	-58.3125	-66.4688	-61.625	-58.75	-59.9062	-67.2812	-62.0312	-67.1562	-61.8125
		0.06	4.52	-64.4062	-64.6562	-64.375	-57.3438	-66	-65.9688	-58.1875	-58.4062	-66.4062	-61.6562	-58.8438	-60	-67.1875	-62.0938	-67.2188	-61.7188
		0.06	4.54	-64.4688	-64.6875	-64.4062	-57.3125	-66	-66	-58.2812	-58.375	-66.5312	-61.7188	-58.8125	-59.9375	-67.25	-62.0938	-67.1875	-61.7188
		0.06	4.56	-64.5	-64.6562	-64.4062	-57.375	-65.9688	-66.0312	-58.2188	-58.3438	-66.5938	-61.7812	-58.9062	-59.8438	-67.3125	-61.9688	-67.1875	-61.7812
		0.06	4.58	-64.5312	-64.7188	-64.4688	-57.4688	-65.9375	-66.0312	-58.2812	-58.4062	-66.5	-61.7188	-58.9688	-59.9688	-67.25	-62.125	-67.2188	-61.875
		0.06	4.6	-64.5	-64.7812	-64.5312	-57.4062	-66.0312	-66.0312	-58.1875	-58.4688	-66.5625	-61.6875	-58.9062	-60.0312	-67.25	-62.0938	-67.1875	-61.7812
		0.06	4.62	-64.5312	-64.7812	-64.4688	-57.4375	-66.0938	-66.0312	-58.25	-58.375	-66.6875	-61.8125	-59.0312	-60	-67.3438	-62.0625	-67.2812	-61.7812
		0.06	4.64	-64.5938	-64.875	-64.5	-57.4688	-66.0312	-66.0938	-58.2812	-58.5312	-66.6875	-61.6875	-59.0312	-59.9688	-67.4062	-62.125	-67.3438	-61.8438
		0.06	4.66	-64.7188	-64.8438	-64.5938	-57.4375	-66	-66.1562	-58.3438	-58.5	-66.6875	-61.75	-58.9375	-60.0312	-67.4062	-62.1562	-67.3125	-61.8125
		0.06	4.68	-64.6562	-64.8438	-64.5625	-57.4375	-66.1875	-66.1562	-58.3125	-58.5	-66.6562	-61.7812	-59.0625	-60.0312	-67.4062	-62.1562	-67.3125	-61.7188
		0.06	4.7	-64.6562	-64.8438	-64.5625	-57.5	-66.1562	-66.1562	-58.375	-58.5312	-66.6562	-61.8125	-59.125	-60.0312	-67.4688	-62.1562	-67.375	-61.7812
		0.06	4.72	-64.6562	-64.875	-64.6562	-57.5	-66.1875	-66.25	-58.3438	-58.5312	-66.7188	-61.8125	-59.1875	-60	-67.375	-62.1562	-67.5	-61.8438
		0.06	4.74	-64.6875	-64.8438	-64.6562	-57.4062	-66.2812	-66.2812	-58.4375	-58.5625	-66.7188	-61.75	-59.125	-60.0938	-67.4062	-62.1875	-67.4688	-61.7812
		0.06	4.76	-64.8438	-64.9688	-64.7188	-57.5	-66.25	-66.3125	-58.4375	-58.5938	-66.7812	-61.8438	-59.1875	-60.1562	-67.5	-62.1875	-67.3125	-61.8438
		0.06	4.78	-64.7812	-65	-64.7812	-57.5	-66.2812	-66.25	-58.5	-58.5312	-66.9062	-61.7812	-59.1562	-60.1875	-67.5312	-62.1562	-67.5	-61.875
		0.06	4.8	-64.7812	-64.9375	-64.8125	-57.4688	-66.2812	-66.2812	-58.4062	-58.5625	-66.8125	-61.8125	-59.25	-60.1562	-67.5	-62.1562	-67.5	-61.8438
		0.06	4.82	-64.875	-64.9062	-64.7188	-57.5625	-66.3125	-66.25	-58.4688	-58.6875	-66.8438	-61.8438	-59.2188	-60.25	-67.5312	-62.2188	-67.4688	-61.875
		0.06	4.84	-64.875	-65.0625	-64.9375	-57.625	-66.3125	-66.375	-58.4688	-58.625	-66.8125	-61.9062	-59.2812	-60.1562	-67.5625	-62.1562	-67.4062	-61.9062
		0.06	4.86	-64.8438	-65.0625	-64.9062	-57.5312	-66.3125	-66.3438	-58.5	-58.7188	-66.8438	-61.875	-59.2188	-60.2812	-67.5312	-62.2188	-67.5312	-61.9688
		0.06	4.88	-64.9375	-65.0625	-64.7812	-57.5938	-66.375	-66.2812	-58.5312	-58.7188	-66.9375	-61.9062	-59.2188	-60.25	-67.5938	-62.2188	-67.5	-61.9688
		0.06	4.9	-64.875	-65.0312	-64.9062	-57.625	-66.4062	-66.3125	-58.5938	-58.6562	-67	-61.875	-59.3438	-60.1875	-67.5938	-62.1562	-67.4688	-61.9062
		0.06	4.92	-64.9375	-65.0625	-64.9688	-57.5312	-66.4062	-66.3438	-58.5	-58.7188	-66.9062	-61.875	-59.3438	-60.1875	-67.6562	-62.2812	-67.5938	-62.0312
		0.06	4.94	-65.0312	-65.125	-64.875	-57.5625	-66.4688	-66.375	-58.625	-58.7188	-67.0312	-61.875	-59.2812	-60.3125	-67.6562	-62.2812	-67.5312	-62.0312
		0.06	4.96	-64.9688	-65.0625	-64.9688	-57.6562	-66.4062	-66.4688	-58.625	-58.6562	-67.0938	-61.9375	-59.4062	-60.2812	-67.5938	-62.2812	-67.5625	-61.9688
		0.06	4.98	-65	-65.2188	-65.0312	-57.625	-66.4062	-66.5	-58.5938	-58.7812	-67	-61.9688	-59.5	-60.3125	-67.6875	-62.3125	-67.6875	-61.9688
		0.16	0	-61.5	-60.5	-60.1562	-60.1562	-59.8438	-59.75	-61.2188	-61.0312	-61.4688	-61.5	-62.6875	-62.3125	-62.1875	-62.5938	-63.3438	-63.0938	-63.6875	-63.4688
		0.16	0.02	-61.5938	-60.5312	-60.1562	-60.2188	-59.75	-59.7188	-61.375	-61.0938	-61.5312	-61.5312	-62.625	-62.4375	-62.1875	-62.5938	-63.3438	-63.0938	-63.8125	-63.4062
		0.16	0.04	-61.5	-60.5	-60.2188	-60.1562	-59.9062	-59.8438	-61.25	-61.0938	-61.5	-61.5312	-62.6875	-62.375	-62.1562	-62.5625	-63.3125	-63.125	-63.7188	-63.4062
		0.16	0.06	-61.5625	-60.5	-60.1875	-60.1875	-59.8438	-59.8125	-61.25	-61.0625	-61.5312	-61.5312	-62.625	-62.3438	-62.3125	-62.625	-63.4375	-63.0312	-63.6562	-63.4062
		0.16	0.08	-61.5312	-60.5625	-60.1875	-60.1562	-59.75	-59.7188	-61.375	-61.125	-61.5	-61.5938	-62.6562	-62.3125	-62.1562	-62.5625	-63.4062	-63	-63.75	-63.3438
		0.16	0.1	-61.5	-60.5312	-60.2188	-60.1875	-59.7812	-59.7812	-61.3125	-61.0625	-61.5938	-61.5625	-62.7188	-62.375	-62.1875	-62.5	-63.375	-63.125	-63.6562	-63.4375
		0.16	0.12	-61.5	-60.5312	-60.2812	-60.1875	-59.7188	-59.75	-61.2812	-61	-61.5	-61.5625	-62.6562	-62.3438	-62.1875	-62.5938	-63.3438	-63.0938	-63.7188	-63.4688
		0.16	0.14	-61.5938	-60.5312	-60.125	-60.2812	-59.75	-59.75	-61.3438	-61.125	-61.5312	-61.6562	-62.6562	-62.3438	-62.1562	-62.625	-63.3125	-63.125	-63.7188	-63.4688
		0.16	0.16	-61.4688	-60.5	-60.1875	-60.125	-59.7188	-59.8438	-61.2812	-61.0312	-61.4375	-61.5	-62.6875	-62.4062	-62.1562	-62.5625	-63.3438	-63.125	-63.6562	-63.5
		0.16	0.18	-61.4062	-60.375	-59.9688	-60.0938	-59.6562	-59.6875	-61.125	-60.9688	-61.4062	-61.4375	-62.4688	-62.2188	-62.0938	-62.5312	-63.2812	-63	-63.5625	-63.2812
		0.16	0.2	-62.125	-61.1562	-60.6875	-60.8125	-60.5	-60.4062	-61.6875	-61.5	-62	-62.1562	-63.2188	-62.9062	-62.625	-63.0938	-63.9375	-63.6875	-64.1562	-63.9375
		0.16	0.22	-65.9688	-65.0312	-64.6875	-64.7812	-64.3438	-64.3438	-65.5625	-65.3438	-65.9062	-65.9062	-67.25	-66.9062	-66.7812	-67.0938	-67.5625	-67.3438	-67.875	-67.6562
		0.16	0.24	-68.7188	-67.75	-67.3438	-67.4375	-67.0312	-66.9688	-68.2812	-68.0312	-68.4688	-68.5625	-70.0625	-69.7188	-69.5938	-69.9688	-70.25	-70	-70.5	-70.25
		0.16	0.26	-68.6875	-67.7188	-67.25	-67.375	-67	-66.9375	-68.2812	-68.0625	-68.5	-68.5938	-70.0938	-69.7188	-69.6562	-70.0625	-70.3125	-70.0938	-70.6562	-70.375
		0.16	0.28	-67.625	-66.7812	-66.3125	-66.4062	-66.0312	-65.9062	-67.4375	-67.1562	-67.5625	-67.6875	-69.0625	-68.75	-68.625	-69.0312	-69.5625	-69.2812	-69.8438	-69.5625
		0.16	0.3	-66.5625	-65.5312	-65.1562	-65.25	-64.875	-64.7812	-66.2812	-66.0938	-66.4375	-66.6875	-67.9062	-67.625	-67.4062	-67.9375	-68.5	-68.25	-68.6875	-68.4688
		0.16	0.32	-65.5	-64.5312	-64.1562	-64.1875	-63.7812	-63.7812	-65.3125	-65.0938	-65.5	-65.5312	-66.8125	-66.4375	-66.25	-66.5625	-67.4062	-67.125	-67.75	-67.4688
		0.16	0.34	-64.5625	-63.625	-63.3438	-63.3125	-62.9062	-62.7812	-64.4688	-64.1875	-64.625	-64.7188	-65.9062	-65.5	-65.3438	-65.6562	-66.5938	-66.3125	-66.9688	-66.625
		0.16	0.36	-63.9688	-62.9688	-62.6562	-62.625	-62.3438	-62.1875	-63.9688	-63.75	-64.0312	-64.1562	-65.2188	-64.8125	-64.6562	-65.0938	-65.9688	-65.6562	-66.125	-65.9688
		0.16	0.38	-63.5	-62.5312	-62.125	-62.0625	-61.6875	-61.75	-63.4062	-63.1875	-63.5	-63.5312	-64.6875	-64.2812	-64.0312	-64.4375	-65.4375	-65.0625	-65.7812	-65.5
		0.16	0.4	-63	-62.0938	-61.75	-61.9062	-61.4062	-61.3438	-62.9375	-62.75	-63.125	-63.25	-64.2812	-63.8125	-63.7188	-64.0938	-65.0938	-64.7188	-65.3438	-65.0625
		0.16	0.42	-62.875	-61.7812	-61.5	-61.4375	-61.1875	-61.0312	-62.5625	-62.5	-62.8125	-63.0312	-63.9688	-63.5938	-63.4688	-63.9062	-64.8438	-64.4688	-65.0312	-64.7812
		0.16	0.44	-62.6562	-61.5938	-61.3125	-61.1875	-60.9062	-60.9375	-62.4375	-62.2188	-62.5938	-62.7188	-63.8125	-63.4062	-63.2188	-63.6562	-64.5312	-64.1875	-64.9375	-64.5312
		0.16	0.46	-62.375	-61.4688	-61.0312	-61.0625	-60.6875	-60.625	-62.25	-62.0312	-62.5	-62.5625	-63.5625	-63.2188	-63.125	-63.4688	-64.4375	-64.0312	-64.7188	-64.3438
		0.16	0.48	-62.3125	-61.3438	-60.9375	-60.9375	-60.5938	-60.5938	-62.125	-61.9375	-62.3125	-62.375	-63.5312	-63	-62.9375	-63.4375	-64.2188	-63.9375	-64.5312	-64.0938
		0.16	0.5	-62.1562	-61.2812	-60.9062	-60.8438	-60.4062	-60.5	-61.9375	-61.7188	-62.2188	-62.2812	-63.375	-63	-62.8438	-63.2812	-64.125	-63.7812	-64.4375	-64.0625
		0.16	0.52	-62.0938	-61.1562	-60.75	-60.7188	-60.375	-60.375	-61.8438	-61.5625	-62.1875	-62.125	-63.3125	-62.875	-62.75	-63.1562	-64.0625	-63.6875	-64.3125	-64.0312
		0.16	0.54	-62	-61.0625	-60.7188	-60.6875	-60.4062	-60.3438	-61.7188	-61.625	-62.0312	-62.1562	-63.2188	-62.7812	-62.6562	-63.0625	-64.0312	-63.6562	-64.1875	-63.9062
		0.16	0.56	-62.0312	-61.0312	-60.7188	-60.6562	-60.25	-60.25	-61.6875	-61.5625	-61.9688	-62.0938	-63.0625	-62.75	-62.6562	-63.0938	-63.9062	-63.5625	-64.125	-63.9062
		0.16	0.58	-61.9688	-60.9688	-60.5625	-60.5	-60.25	-60.2188	-61.625	-61.5	-61.9688	-62.0312	-63.125	-62.7812	-62.5312	-62.9688	-63.8438	-63.5	-64.125	-63.8125
		0.16	0.6	-61.9375	-61	-60.5938	-60.5625	-60.2812	-60.2188	-61.5938	-61.4688	-61.8125	-62.0312	-63.125	-62.625	-62.5	-62.9375	-63.75	-63.4375	-64.0312	-63.8125
		0.16	0.62	-61.9062	-60.875	-60.625	-60.4688	-60.2188	-60.0625	-61.5	-61.3438	-61.8125	-61.9375	-63.0625	-62.5625	-62.5	-62.875	-63.7812	-63.375	-64.0312	-63.7812
		0.16	0.64	-61.7812	-60.875	-60.5312	-60.4375	-60.1875	-60.125	-61.5	-61.3125	-61.9062	-61.9688	-62.9688	-62.625	-62.5	-62.9062	-63.6875	-63.3125	-64.0312	-63.6875
		0.16	0.66	-61.8125	-60.875	-60.4688	-60.4375	-60.125	-60.0625	-61.5	-61.4062	-61.8438	-61.9375	-63	-62.5938	-62.4062	-62.9062	-63.6875	-63.2812	-64.0312	-63.6562
		0.16	0.68	-61.8125	-60.8438	-60.4688	-60.4375	-60.0625	-59.9375	-61.5312	-61.2188	-61.6875	-61.8125	-62.875	-62.4688	-62.5	-62.9062	-63.6875	-63.2812	-63.875	-63.6562
		0.16	0.7	-61.75	-60.9375	-60.4688	-60.4375	-60.0938	-60	-61.4688	-61.2812	-61.6562	-61.8125	-62.9375	-62.5625	-62.4688	-62.8438	-63.625	-63.3125	-63.9062	-63.625
		0.16	0.72	-61.8438	-60.7812	-60.3438	-60.5	-60.0312	-59.9375	-61.5	-61.4062	-61.6562	-61.8438	-62.9688	-62.5	-62.5	-62.8438	-63.7188	-63.2812	-63.8125	-63.7188
		0.16	0.74	-61.8125	-60.8438	-60.375	-60.3438	-60.0312	-59.9062	-61.4062	-61.2812	-61.5625	-61.7188	-62.9375	-62.4375	-62.4688	-62.875	-63.6562	-63.2812	-63.875	-63.625
		0.16	0.76	-61.7812	-60.9062	-60.4375	-60.3438	-60.0938	-59.9375	-61.3438	-61.25	-61.5312	-61.875	-62.9375	-62.4688	-62.4062	-62.6875	-63.625	-63.3125	-63.9062	-63.625
		0.16	0.78	-61.7812	-60.6875	-60.4062	-60.375	-60	-59.9375	-61.4688	-61.2812	-61.625	-61.7188	-62.875	-62.5	-62.375	-62.8125	-63.6562	-63.2188	-63.75	-63.625
		0.16	0.8	-61.7188	-60.8438	-60.375	-60.375	-60	-59.9688	-61.4375	-61.2188	-61.5	-61.7188	-62.9062	-62.4688	-62.4062	-62.7812	-63.625	-63.2812	-63.8125	-63.6562
		0.16	0.82	-61.6875	-60.8438	-60.3438	-60.3125	-60	-59.9688	-61.4062	-61.2812	-61.5625	-61.8438	-62.9062	-62.3125	-62.3125	-62.7812	-63.625	-63.1875	-63.875	-63.5625
		0.16	0.84	-61.6875	-60.7188	-60.4062	-60.4375	-59.9375	-59.875	-61.3438	-61.3438	-61.5938	-61.7188	-62.9062	-62.375	-62.3125	-62.7812	-63.625	-63.1875	-63.8438	-63.6562
		0.16	0.86	-61.6562	-60.7188	-60.2812	-60.3125	-59.9375	-59.875	-61.3438	-61.1875	-61.625	-61.75	-63.0312	-62.5	-62.4062	-62.7812	-63.5938	-63.3125	-63.7812	-63.625
		0.16	0.88	-61.6875	-60.8125	-60.3125	-60.2812	-60	-59.9375	-61.3438	-61.1875	-61.5312	-61.8125	-62.9062	-62.4062	-62.3125	-62.6875	-63.5312	-63.25	-63.875	-63.5625
		0.16	0.9	-61.7188	-60.8125	-60.3125	-60.3438	-60.0312	-59.7812	-61.2812	-61.25	-61.5938	-61.7812	-62.8438	-62.4375	-62.4688	-62.8125	-63.5938	-63.2812	-63.875	-63.5938
		0.16	0.92	-61.7188	-60.8125	-60.2812	-60.3125	-60	-59.875	-61.1562	-61.0938	-61.5	-61.7188	-62.9688	-62.4062	-62.375	-62.8125	-63.5	-63.2812	-63.8125	-63.5625
		0.16	0.94	-61.7188	-60.8125	-60.3125	-60.25	-59.9688	-59.9062	-61.375	-61.2188	-61.5312	-61.75	-62.875	-62.4062	-62.3438	-62.8125	-63.5625	-63.2188	-63.8438	-63.5
		0.16	0.96	-61.7188	-60.7188	-60.2812	-60.4375	-59.9688	-59.7812	-61.375	-61.1562	-61.5312	-61.6562	-62.875	-62.3438	-62.3438	-62.7812	-63.5625	-63.1562	-63.8125	-63.5938
		0.16	0.98	-61.6875	-60.7188	-60.2188	-60.3438	-59.9375	-59.7812	-61.375	-61.0938	-61.5625	-61.625	-62.9375	-62.3438	-62.2188	-62.7188	-63.4688	-63.1562	-63.7188	-63.5
		0.16	1	-61.7812	-60.9688	-60.1875	-60.375	-60	-60.0312	-61.4375	-61.3125	-61.5625	-61.7812	-62.7812	-62.4375	-62.3438	-62.5625	-63.5	-63.125	-63.7188	-63.5
		0.16	1.02	-62	-61.0312	-60.3125	-60.5625	-60	-60.125	-61.625	-61.375	-61.6875	-61.875	-62.5938	-62.3125	-62.2188	-62.4688	-63.4375	-63.0938	-63.625	-63.4062
		0.16	1.04	-62.0625	-61.1562	-60.3125	-60.625	-60.0625	-60.3125	-61.7188	-61.4375	-61.8125	-62.0625	-62.5625	-62.2188	-62.0312	-62.375	-63.4062	-63.0938	-63.5	-63.2812
		0.16	1.06	-62.2188	-61.3125	-60.4375	-60.75	-60.0938	-60.5312	-61.9062	-61.5938	-61.8125	-62.1875	-62.3125	-62.2812	-62	-62.0312	-63.4062	-63.0938	-63.4688	-63.2812
		0.16	1.08	-62.4375	-61.5	-60.5	-60.875	-60.25	-60.6875	-62.25	-61.7188	-61.9062	-62.25	-62.3438	-62.2812	-61.8438	-61.8125	-63.375	-63.2188	-63.4375	-63.1875
		0.16	1.1	-62.5625	-61.6562	-60.5938	-61	-60.25	-60.9375	-62.5	-61.8125	-62	-62.4688	-62.25	-62.1875	-61.7188	-61.75	-63.3438	-63.3125	-63.3125	-63.0938
		0.16	1.12	-62.6875	-61.75	-60.6875	-61.0625	-60.25	-61.1562	-62.7188	-62.0312	-62.0938	-62.5625	-62.125	-62.2188	-61.8438	-61.625	-63.4062	-63.375	-63.3125	-63.0625
		0.16	1.14	-62.875	-61.875	-60.875	-61.3125	-60.25	-61.3438	-62.9688	-62.0312	-62.2188	-62.6562	-62.0938	-62.2812	-61.6562	-61.5	-63.4062	-63.5	-63.25	-63
		0.16	1.16	-62.9688	-61.875	-60.875	-61.4062	-60.3438	-61.6875	-63.3125	-62.0625	-62.4375	-62.8125	-62.0312	-62.2188	-61.6562	-61.4688	-63.5	-63.625	-63.125	-63
		0.16	1.18	-63.2188	-61.9062	-61	-61.5312	-60.3125	-61.9062	-63.4688	-62.1875	-62.4375	-63	-61.875	-62.0625	-61.625	-61.4688	-63.5938	-63.5625	-63	-62.9062
		0.16	1.2	-63.3438	-61.9062	-60.9375	-61.5312	-60.2188	-62.0938	-63.5	-62.0312	-62.5312	-63.0312	-61.8125	-61.875	-61.4375	-61.375	-63.4688	-63.5938	-62.875	-62.875
		0.16	1.22	-63.4062	-61.625	-60.9062	-61.5	-60.1875	-62.2812	-63.75	-61.8125	-62.4375	-63.0938	-61.5938	-61.6875	-61.375	-61.25	-63.4375	-63.5	-62.7188	-62.7812
		0.16	1.24	-63.4062	-61.4062	-60.8438	-61.4688	-59.9688	-62.375	-63.7812	-61.6562	-62.3438	-63.1562	-61.2812	-61.1562	-61.1875	-61.125	-63.2188	-63.25	-62.2812	-62.5625
		0.16	1.26	-63.4688	-61.0312	-60.5312	-61.0938	-59.6562	-62.4062	-63.5312	-61.2188	-62	-63	-60.9688	-60.6875	-60.7812	-60.9062	-62.9688	-63	-61.9375	-62.375
		0.16	1.28	-63.2812	-60.4375	-60.125	-60.75	-59.3438	-62.4375	-63.375	-60.5938	-61.6875	-62.7188	-60.4062	-60.0625	-60.4062	-60.6562	-62.5938	-62.5	-61.5312	-62
		0.16	1.3	-63.0312	-59.75	-59.6875	-60.1562	-58.875	-62.1875	-62.9062	-59.875	-61.0938	-62.4375	-59.625	-59.2188	-59.9375	-60.1562	-61.9688	-61.8125	-60.9688	-61.4062
		0.16	1.32	-62.6875	-59.0625	-59.25	-59.375	-58.5	-61.875	-62.3125	-59.0312	-60.5	-62	-58.9375	-58.25	-59.4688	-59.5938	-61.3438	-61.1875	-60.4688	-60.9062
		0.16	1.34	-62.0312	-58.1562	-58.4688	-58.5938	-57.9688	-61.5625	-61.625	-58.0312	-59.8125	-61.5312	-57.875	-57.125	-58.9062	-59.0625	-60.4688	-60.3438	-59.7812	-60.1875
		0.16	1.36	-61.5	-57.3125	-57.5938	-57.5938	-57.2812	-61	-60.875	-57.1562	-59.1562	-61	-56.8438	-56.1875	-58.2188	-58.4688	-59.5	-59.3438	-59.0625	-59.4375
		0.16	1.38	-60.875	-56.4062	-56.8438	-56.7188	-56.7188	-60.5	-60.0625	-56.125	-58.2812	-60.25	-55.6875	-55	-57.5	-57.8438	-58.4688	-58.375	-58.375	-58.75
		0.16	1.4	-60.0312	-55.2812	-56	-55.7812	-56.125	-60.0312	-59.0938	-55.125	-57.3438	-59.5	-54.5312	-54.1562	-56.8125	-57.2812	-57.5312	-57.3125	-57.7812	-58.125
		0.16	1.42	-59.1875	-54.3125	-55.0625	-55	-55.5625	-59.4375	-58.1875	-54.1562	-56.4688	-58.7188	-53.5312	-53.125	-56.0312	-56.7812	-56.4688	-56.4688	-57.0625	-57.375
		0.16	1.44	-58.4062	-53.3438	-54.375	-54.25	-55	-58.75	-57.4062	-53.3125	-55.5	-58.0312	-52.5938	-52.25	-55.4375	-56.25	-55.5	-55.5625	-56.5625	-56.875
		0.16	1.46	-57.6562	-52.2812	-53.5312	-53.5	-54.4688	-58.2812	-56.4375	-52.375	-54.6562	-57.3438	-51.7188	-51.3438	-54.8125	-55.8125	-54.5625	-54.7188	-56.1562	-56.3438
		0.16	1.48	-56.9375	-51.3125	-52.8125	-52.8438	-53.7188	-57.75	-55.5938	-51.6562	-53.9375	-56.625	-50.9375	-50.625	-54.375	-55.4375	-53.6562	-53.9062	-55.625	-55.8438
		0.16	1.5	-56.4375	-50.4688	-52.3125	-52.25	-53.0938	-57.2812	-54.7812	-50.875	-53.25	-55.8438	-50.3125	-49.9375	-53.9062	-55	-53	-53.2812	-55.25	-55.4688
		0.16	1.52	-55.8438	-49.75	-51.7188	-51.6562	-52.5312	-56.9062	-54.125	-50.1562	-52.5312	-55.4062	-49.6875	-49.3438	-53.4375	-54.6562	-52.2812	-52.5	-55	-55.0312
		0.16	1.54	-55.3438	-48.8438	-51.2812	-51.25	-51.9688	-56.4688	-53.375	-49.625	-51.9375	-54.8125	-49.1562	-48.8438	-53.0938	-54.5	-51.5	-51.9688	-54.75	-54.625
		0.16	1.56	-55.0625	-48.2188	-50.7812	-50.8438	-51.4688	-56.125	-52.8438	-48.875	-51.4688	-54.25	-48.6562	-48.375	-52.8438	-54.2812	-51	-51.4688	-54.5	-54.4062
		0.16	1.58	-54.7188	-47.5	-50.5	-50.5312	-51.0938	-56	-52.2812	-47.8438	-51	-53.8438	-48.0938	-47.9688	-52.5	-54	-50.5312	-50.9375	-54.3438	-54.0312
		0.16	1.6	-54.4688	-46.5938	-50.1562	-50.3125	-50.5938	-55.7188	-51.875	-46.3438	-50.4375	-53.5312	-47.625	-47.5	-52.4062	-53.9688	-50.0938	-50.4062	-54.2812	-53.6562
		0.16	1.62	-54.3438	-44.9688	-49.8125	-50	-50.4375	-55.5312	-51.375	-43.5312	-50.0625	-53.0312	-47.0938	-46.875	-52.25	-53.8125	-49.625	-49.9688	-54.0938	-53.4062
		0.16	1.64	-54.125	-42.3438	-49.5938	-49.9375	-50.0312	-55.5	-51.0938	-39.5	-49.75	-52.7188	-45.8438	-45.625	-52.0938	-53.5938	-48.8125	-49.5	-54	-53.0938
		0.16	1.66	-54	-38.3438	-49.4375	-49.7188	-49.8125	-55.4062	-50.7188	-34.2812	-49.4375	-52.5	-43.5312	-43.3125	-52	-53.6562	-47.2188	-49.0625	-53.9688	-52.875
		0.16	1.68	-53.75	-33	-49.2188	-49.5625	-49.625	-55.2188	-50.3438	-26.9062	-49.0312	-52.1562	-39.8438	-39.6562	-51.9375	-53.5938	-44.625	-48.2188	-53.9688	-52.7812
		0.16	1.7	-53.7188	-25.8438	-49.0938	-49.6562	-49.4375	-55.2812	-50.0625	-17.75	-48.75	-52.0312	-34.8438	-34.625	-51.8438	-53.5625	-40.6875	-46.3438	-53.875	-52.5312
		0.16	1.72	-53.625	-16.7188	-48.9375	-49.5	-49.2812	-55.125	-49.8125	-8.46875	-48.3438	-51.9688	-28.0312	-27.875	-51.75	-53.5312	-35.4688	-43.5	-53.9062	-52.4062
		0.16	1.74	-53.5	-6.84375	-48.8438	-49.4375	-49.2812	-55.0312	-49.5312	-0.0625	-47.5	-51.75	-18.9062	-18.7188	-51.7188	-53.5	-28.4688	-39.375	-53.9375	-52.4375
		0.16	1.76	-53.5938	2	-48.7812	-49.4062	-49.125	-55.0938	-49.375	6.09375	-46.0312	-51.625	-8.65625	-8.625	-51.6562	-53.5938	-19.3438	-33.7812	-53.875	-52.3125
		0.16	1.78	-53.4688	8.65625	-48.75	-49.375	-49.125	-54.9375	-49.2188	9.25	-43.375	-51.5625	0.84375	1	-51.75	-53.6562	-9.65625	-26.4062	-53.9062	-52.2188
		0.16	1.8	-53.4688	12.5938	-48.6875	-49.3125	-49.1875	-55	-48.8125	9.53125	-39.4688	-51.4688	8.40625	8.625	-51.6875	-53.6562	-0.8125	-17.0312	-53.9375	-52.3438
		0.16	1.82	-53.5	13.1875	-48.625	-49.3438	-49.0938	-55	-48.625	7.09375	-34.4062	-51.2812	13.125	13.1875	-51.7812	-53.6875	6.0625	-7.3125	-53.875	-52.25
		0.16	1.84	-53.4688	10.8125	-48.75	-49.5	-49.0938	-54.9688	-48.0312	2.65625	-27.375	-51.3125	14.25	14.375	-51.9062	-53.5938	10	1.15625	-54.0312	-52.3125
		0.16	1.86	-53.5	6.3125	-48.875	-49.5312	-49.1562	-55.0312	-46.5938	-3.15625	-18.5625	-51.1562	12.3438	12.3125	-51.8438	-53.6875	10.625	7.3125	-54.125	-52.4062
		0.16	1.88	-53.5	0.125	-48.8438	-49.5	-49.0625	-55.0312	-44.25	-9.71875	-9.1875	-51.0312	8	7.90625	-51.8438	-53.5312	8.625	10.5625	-54.1562	-52.5
		0.16	1.9	-53.5312	-7.0625	-48.9375	-49.625	-49.1562	-55.0312	-40.7812	-16.8438	-0.84375	-51.0938	1.65625	1.625	-51.9688	-53.5625	4.28125	10.5625	-54.1875	-52.5625
		0.16	1.92	-53.625	-14.5625	-49.125	-49.6875	-49.2812	-55.125	-35.9688	-23.5625	5.5625	-50.9375	-5.5	-5.65625	-51.8125	-53.5312	-1.5	7.84375	-54.25	-52.6562
		0.16	1.94	-53.6875	-21.9062	-49.125	-49.8438	-49.25	-55.125	-29.5312	-29.75	9.25	-50.9375	-13.25	-13.4062	-51.8438	-53.5	-8.28125	3.125	-54.3125	-52.6562
		0.16	1.96	-53.6562	-28.875	-49.3125	-50	-49.4375	-55.125	-21.25	-35.4688	9.90625	-50.875	-20.9688	-21.0625	-51.9375	-53.4375	-15.5312	-3.15625	-54.375	-52.6875
		0.16	1.98	-53.6875	-34.9062	-49.5312	-50.0938	-49.5	-55.2188	-11.7812	-40.2812	7.78125	-50.9062	-28.0312	-28.25	-51.875	-53.5312	-22.7188	-10.125	-54.5312	-52.7812
		0.16	2	-53.875	-40.1562	-49.75	-50.1875	-49.6562	-55.3438	-3.03125	-44.3125	3.65625	-50.9062	-34.3438	-34.5312	-51.9375	-53.5312	-29.3438	-17.4375	-54.5938	-52.7812
		0.16	2.02	-53.9062	-44.5	-49.875	-50.4062	-49.7188	-55.3125	4	-47.875	-2	-50.9688	-39.8125	-39.9062	-52.0625	-53.5	-35.4375	-24.5312	-54.6562	-52.8438
		0.16	2.04	-53.9375	-48.1875	-50	-50.4688	-49.8438	-55.4375	8.5	-50.6562	-8.65625	-50.9062	-44.375	-44.5625	-52.0625	-53.625	-40.5938	-31.0938	-54.6875	-52.8438
		0.16	2.06	-53.9375	-51.125	-50.1562	-50.4688	-49.9062	-55.5	10.0938	-52.9375	-15.5	-50.875	-48.1875	-48.375	-52.25	-53.6562	-44.9688	-36.7812	-54.6875	-52.875
		0.16	2.08	-54.0312	-53.5	-50.3125	-50.6875	-50.0938	-55.5	8.71875	-54.8438	-22.375	-50.9688	-51.2812	-51.4375	-52.3125	-53.6562	-48.6875	-41.8125	-54.8438	-53
		0.16	2.1	-54	-55.5	-50.4062	-50.8438	-50.2188	-55.5938	5.21875	-56.3125	-28.8438	-50.9375	-53.7812	-53.8438	-52.4062	-53.7812	-51.6875	-46	-54.9688	-53.0625
		0.16	2.12	-54.0312	-57	-50.5	-50.9688	-50.3438	-55.6875	0	-57.5	-34.4688	-50.9375	-55.7812	-55.875	-52.5	-53.9375	-54.1562	-49.4688	-55.0312	-53
		0.16	2.14	-54.0938	-58.3438	-50.6875	-51.0312	-50.4688	-55.6875	-6.21875	-58.3125	-39.4688	-51.0312	-57.25	-57.3438	-52.5625	-54.0625	-56.3125	-52.3125	-55.0938	-53.25
		0.16	2.16	-53.9688	-59.25	-50.9062	-51.1562	-50.6875	-55.6875	-13.0312	-59.0938	-43.6875	-51.1562	-58.5625	-58.5938	-52.625	-54.125	-57.8438	-54.7188	-55.1875	-53.2188
		0.16	2.18	-54.0938	-60	-51.0312	-51.3125	-50.6875	-55.6875	-20.0312	-59.5312	-47.2812	-51.2188	-59.4375	-59.5	-52.75	-54.2812	-59.1875	-56.5312	-55.4062	-53.2188
		0.16	2.2	-53.9375	-60.4688	-51.2812	-51.375	-50.875	-55.7812	-26.5312	-59.9688	-50.2188	-51.3438	-60.1562	-60.2812	-52.9062	-54.3125	-60.25	-58.125	-55.4375	-53.375
		0.16	2.22	-53.875	-60.9062	-51.3438	-51.5938	-51	-55.7812	-32.4688	-60.3125	-52.625	-51.4375	-60.75	-60.7812	-52.875	-54.4062	-61.0625	-59.3125	-55.5	-53.4688
		0.16	2.24	-53.8438	-61.1875	-51.5	-51.625	-51.0938	-55.9375	-37.75	-60.5	-54.6562	-51.5	-61.25	-61.3125	-53	-54.5938	-61.75	-60.125	-55.7812	-53.5938
		0.16	2.26	-53.8438	-61.1875	-51.6562	-51.6562	-51.2188	-55.875	-42.1562	-60.75	-56.2188	-51.6562	-61.5	-61.5312	-53.0938	-54.5625	-62.3438	-60.9375	-55.8125	-53.7188
		0.16	2.28	-53.8125	-61.4688	-51.8438	-51.9375	-51.375	-55.9375	-45.875	-60.7188	-57.4375	-51.6875	-61.7188	-61.7812	-53.1562	-54.7188	-62.625	-61.5312	-55.875	-53.8125
		0.16	2.3	-53.7812	-61.5625	-51.9375	-51.8438	-51.5	-55.9375	-49.1875	-60.9375	-58.5	-51.7812	-61.9375	-61.9688	-53.2812	-54.8125	-62.875	-62	-55.9688	-53.8438
		0.16	2.32	-53.7812	-61.4688	-51.9688	-51.875	-51.5938	-55.9375	-51.6875	-61.0938	-59.3125	-51.9375	-62	-62.0625	-53.4375	-54.9375	-63.1562	-62.3125	-56.1875	-54.0312
		0.16	2.34	-53.75	-61.4688	-52.125	-51.9375	-51.7188	-56.0625	-53.8438	-61.0625	-60	-51.9688	-62.1562	-62.1875	-53.5312	-54.9375	-63.2812	-62.6562	-56.2812	-54.1562
		0.16	2.36	-53.75	-61.5	-52.3125	-51.9375	-51.75	-56.0938	-55.5625	-61.125	-60.4375	-52.0625	-62.1875	-62.25	-53.5938	-55.1875	-63.5	-62.75	-56.3125	-54.2812
		0.16	2.38	-53.7812	-61.4062	-52.2812	-51.875	-51.9062	-56.0625	-57	-61.0625	-60.9375	-52.1875	-62.0938	-62.2188	-53.6562	-55.2812	-63.5312	-63.0938	-56.5	-54.4688
		0.16	2.4	-53.7188	-61.3125	-52.4375	-51.7812	-52.0938	-56.125	-58	-61.1875	-61.125	-52.3125	-62.2188	-62.2188	-53.7188	-55.3438	-63.5625	-63.1562	-56.5312	-54.5625
		0.16	2.42	-53.6875	-61.3125	-52.5312	-51.7812	-51.9375	-56.1562	-59	-61.25	-61.3125	-52.4062	-62.25	-62.2812	-53.9375	-55.4688	-63.6875	-63.1562	-56.5625	-54.6562
		0.16	2.44	-53.7188	-61.25	-52.5938	-51.6562	-52	-56.1875	-59.6875	-61.1562	-61.5	-52.5312	-62.2188	-62.3438	-54.0625	-55.5625	-63.7188	-63.3125	-56.7812	-54.8438
		0.16	2.46	-53.8125	-61.1562	-52.6562	-51.625	-52.0938	-56.125	-60.1562	-61.2188	-61.5312	-52.5625	-62.2188	-62.2812	-54.0938	-55.625	-63.6875	-63.2812	-56.9062	-54.9062
		0.16	2.48	-53.8125	-61.125	-52.6562	-51.625	-52.0312	-56.125	-60.6875	-61.0938	-61.5625	-52.625	-62.2812	-62.25	-54.3125	-55.75	-63.75	-63.3125	-56.9375	-55
		0.16	2.5	-53.9375	-61.125	-52.8438	-51.625	-52.0938	-55.9375	-60.9062	-61.0938	-61.7188	-52.7812	-62.1875	-62.25	-54.3438	-55.875	-63.75	-63.3438	-57.0312	-55.1562
		0.16	2.52	-54	-61	-52.9062	-51.5312	-52.1562	-55.9375	-61.25	-61.0938	-61.6875	-52.875	-62.2188	-62.1562	-54.4062	-55.9688	-63.6875	-63.4062	-57.1875	-55.25
		0.16	2.54	-54	-61	-52.8125	-51.5312	-52.1875	-55.8438	-61.4062	-61.0625	-61.75	-52.9688	-62.25	-62.1562	-54.5938	-55.9688	-63.75	-63.3438	-57.2188	-55.2812
		0.16	2.56	-54.0312	-61.0312	-53	-51.5625	-52.3438	-55.7188	-61.4688	-61.125	-61.75	-53.0938	-62.1875	-62.1562	-54.6562	-56.1875	-63.7188	-63.4062	-57.3125	-55.4688
		0.16	2.58	-54.0938	-61	-53.0938	-51.4688	-52.375	-55.7188	-61.625	-61.0938	-61.7812	-53.125	-62.25	-62.0938	-54.6875	-56.3125	-63.7188	-63.4375	-57.4375	-55.5938
		0.16	2.6	-54.1562	-61	-53.0938	-51.5312	-52.375	-55.625	-61.7188	-61.0938	-61.6875	-53.2188	-62.3125	-62.25	-54.875	-56.3125	-63.7188	-63.4062	-57.4688	-55.7188
		0.16	2.62	-54.1562	-61.0312	-53.2188	-51.5312	-52.5	-55.4688	-61.75	-61.125	-61.6562	-53.3438	-62.3125	-62.2188	-54.9375	-56.4688	-63.7812	-63.4688	-57.5	-55.875
		0.16	2.64	-54.3438	-61	-53.2188	-51.4688	-52.5312	-55.4375	-61.7812	-61.2188	-61.6562	-53.4688	-62.3125	-62.1875	-54.875	-56.5312	-63.7188	-63.4375	-57.5938	-55.8438
		0.16	2.66	-54.4375	-61	-53.3125	-51.5	-52.5938	-55.4062	-61.8125	-61.1562	-61.6562	-53.5	-62.3438	-62.2188	-55.0625	-56.5938	-63.7812	-63.3438	-57.7812	-56.0625
		0.16	2.68	-54.4062	-61.0312	-53.4062	-51.625	-52.7188	-55.3125	-61.8125	-61.2188	-61.625	-53.5625	-62.3438	-62.1875	-55.2188	-56.6562	-63.9062	-63.4688	-57.7812	-56.25
		0.16	2.7	-54.5312	-61.0625	-53.4375	-51.6562	-52.8438	-55.4375	-61.75	-61.2812	-61.6875	-53.5938	-62.4375	-62.1562	-55.2812	-56.75	-63.7188	-63.4375	-57.9375	-56.2812
		0.16	2.72	-54.625	-61.0312	-53.5	-51.6875	-52.8125	-55.3125	-61.7812	-61.3438	-61.7812	-53.75	-62.5	-62.2188	-55.3125	-56.7812	-63.8125	-63.4062	-58.0312	-56.4062
		0.16	2.74	-54.5938	-61.0312	-53.4688	-51.8125	-52.9062	-55.0312	-61.9062	-61.3438	-61.7188	-53.9062	-62.4688	-62.2812	-55.3125	-56.875	-63.7812	-63.3438	-58.0938	-56.625
		0.16	2.76	-54.6875	-61.125	-53.6875	-51.8438	-53.0312	-55.2188	-61.75	-61.4062	-61.7812	-54	-62.4688	-62.3125	-55.4375	-56.9062	-63.7188	-63.4375	-58.1562	-56.5312
		0.16	2.78	-54.8438	-61.0625	-53.7188	-51.875	-53.0625	-55.3125	-61.7812	-61.375	-61.9062	-53.9375	-62.5938	-62.375	-55.5312	-56.9375	-63.7812	-63.5625	-58.2812	-56.6875
		0.16	2.8	-54.8438	-61.0625	-53.7188	-51.9688	-53.1875	-55.1562	-61.7812	-61.4375	-61.8125	-54.0938	-62.5938	-62.4688	-55.625	-57.0312	-63.7188	-63.4375	-58.3125	-56.8438
		0.16	2.82	-54.9375	-61.1875	-53.875	-52.0938	-53.2188	-55.25	-61.7188	-61.5	-61.9062	-54.1875	-62.6875	-62.4688	-55.6875	-57	-63.625	-63.5625	-58.3125	-56.9062
		0.16	2.84	-55.0625	-61.2188	-54	-52.1562	-53.3438	-55.125	-61.7188	-61.5312	-61.9062	-54.25	-62.5938	-62.5312	-55.75	-57.0312	-63.7812	-63.5312	-58.5	-57
		0.16	2.86	-55.1875	-61.125	-54.0312	-52.1875	-53.4062	-55.1562	-61.875	-61.5312	-61.9062	-54.4375	-62.6875	-62.5	-55.9375	-57.0938	-63.7812	-63.5625	-58.5	-57.0625
		0.16	2.88	-55.1875	-61.2188	-54.0938	-52.3125	-53.5	-55.1875	-61.7812	-61.75	-61.9375	-54.5	-62.875	-62.5938	-55.9062	-57.1562	-63.8125	-63.6875	-58.5625	-57.1875
		0.16	2.9	-55.3125	-61.2812	-54.2188	-52.3125	-53.5	-55.1562	-61.8438	-61.75	-62.0625	-54.5312	-62.8125	-62.6875	-56.1562	-57.25	-63.9062	-63.5938	-58.5625	-57.1875
		0.16	2.92	-55.3125	-61.375	-54.2188	-52.3125	-53.5938	-55.0625	-61.7188	-61.7812	-62.0938	-54.6562	-62.9062	-62.6875	-56.0938	-57.25	-63.875	-63.7812	-58.6562	-57.3125
		0.16	2.94	-55.4062	-61.375	-54.3125	-52.4688	-53.75	-55.0938	-61.8125	-61.8125	-61.875	-54.7188	-62.9062	-62.7812	-56.0312	-57.3125	-63.875	-63.6875	-58.75	-57.3438
		0.16	2.96	-55.4375	-61.4375	-54.4062	-52.5312	-53.75	-55.1875	-61.9062	-61.9375	-62.125	-54.7812	-63	-62.875	-56.25	-57.4062	-63.9062	-63.625	-58.75	-57.5
		0.16	2.98	-55.5625	-61.4688	-54.5	-52.625	-53.875	-55.1875	-61.875	-61.9375	-62.1562	-54.7812	-63	-62.8438	-56.2812	-57.4375	-63.9375	-63.8125	-58.875	-57.5
		0.16	3	-55.5625	-61.5	-54.4688	-52.7188	-53.9375	-55.1562	-61.9688	-62.0938	-62.0938	-54.9062	-63.0625	-62.9375	-56.3438	-57.5	-63.875	-63.9062	-58.9062	-57.5938
		0.16	3.02	-55.5938	-61.4688	-54.625	-52.875	-54	-55.2812	-62.0312	-62.1875	-62.125	-55	-63.125	-62.9375	-56.4375	-57.5938	-63.9688	-63.8438	-59	-57.7812
		0.16	3.04	-55.6875	-61.5938	-54.6875	-52.8438	-54.0625	-55.3438	-61.9688	-62.0938	-62.2188	-55	-63.0938	-63	-56.5	-57.6562	-64.0312	-63.875	-59.0312	-58
		0.16	3.06	-55.75	-61.6562	-54.7188	-52.875	-54.25	-55.375	-62.0938	-62.1875	-62.2188	-55.1562	-63.2188	-63.125	-56.4688	-57.75	-64.0312	-64.0312	-59.125	-57.8438
		0.16	3.08	-55.7812	-61.75	-54.8125	-53.0938	-54.2188	-55.4062	-62.0312	-62.25	-62.2812	-55.0938	-63.3438	-63.1875	-56.6875	-57.8125	-64.0938	-64	-59.0938	-58.0312
		0.16	3.1	-55.9375	-61.8125	-54.9375	-53.125	-54.25	-55.3438	-62.0312	-62.2812	-62.4375	-55.1562	-63.3125	-63.2188	-56.6875	-57.875	-64.0938	-64.0312	-59.1875	-58.0625
		0.16	3.12	-55.9688	-61.8438	-54.9062	-53.1562	-54.4062	-55.375	-62.0938	-62.3438	-62.4688	-55.3438	-63.4062	-63.375	-56.8125	-57.875	-64.125	-64.0938	-59.2812	-58.0312
		0.16	3.14	-56.0312	-61.9688	-55	-53.2188	-54.4688	-55.4375	-62.0625	-62.4688	-62.5	-55.375	-63.4688	-63.3125	-56.9688	-58	-64.1875	-64.0625	-59.2812	-58.2188
		0.16	3.16	-56.0625	-62.0625	-55.0938	-53.3438	-54.5	-55.375	-62.0938	-62.4688	-62.5312	-55.4062	-63.5	-63.375	-57	-58.0625	-64.2188	-64.2188	-59.4062	-58.2188
		0.16	3.18	-56.1562	-62.0938	-55.125	-53.375	-54.6562	-55.4688	-62.3125	-62.5625	-62.5	-55.5312	-63.4375	-63.4375	-56.9062	-58.0625	-64.1562	-64.2188	-59.4375	-58.2812
		0.16	3.2	-56.1562	-62.125	-55.1562	-53.4688	-54.6562	-55.5938	-62.2812	-62.6562	-62.5938	-55.5	-63.625	-63.5	-57.0312	-58.1562	-64.2812	-64.2188	-59.4688	-58.4062
		0.16	3.22	-56.1562	-62.1562	-55.1562	-53.5312	-54.75	-55.5312	-62.3125	-62.5938	-62.5312	-55.5312	-63.6562	-63.5625	-57.125	-58.2188	-64.3438	-64.3125	-59.4062	-58.4688
		0.16	3.24	-56.2812	-62.3438	-55.25	-53.5625	-54.8125	-55.5312	-62.3125	-62.5938	-62.6562	-55.6562	-63.7188	-63.5625	-57.125	-58.1875	-64.3125	-64.4062	-59.5	-58.5
		0.16	3.26	-56.2812	-62.3438	-55.2812	-53.6562	-54.9062	-55.625	-62.4375	-62.75	-62.6562	-55.7812	-63.875	-63.7188	-57.2188	-58.1875	-64.4062	-64.4375	-59.5938	-58.5312
		0.16	3.28	-56.375	-62.375	-55.4375	-53.7812	-54.8438	-55.5938	-62.5	-62.6875	-62.6562	-55.7812	-63.8438	-63.8125	-57.3125	-58.3125	-64.4062	-64.4688	-59.5938	-58.625
		0.16	3.3	-56.4062	-62.375	-55.4062	-53.7188	-55	-55.7188	-62.5	-62.8438	-62.6875	-55.7812	-63.8125	-63.7812	-57.2188	-58.4062	-64.4375	-64.4688	-59.6562	-58.6875
		0.16	3.32	-56.4688	-62.5	-55.5625	-53.8438	-55.0312	-55.7188	-62.5938	-62.9688	-62.7812	-55.9375	-63.875	-63.9375	-57.2812	-58.375	-64.4062	-64.5	-59.75	-58.6875
		0.16	3.34	-56.5	-62.5938	-55.5938	-53.9062	-55.0625	-55.75	-62.625	-62.9375	-62.8125	-55.9375	-63.9062	-63.9688	-57.4375	-58.4688	-64.5	-64.5312	-59.6875	-58.7812
		0.16	3.36	-56.5625	-62.5938	-55.5625	-53.9375	-55.0938	-55.7812	-62.6562	-62.875	-62.9062	-55.9688	-64.0312	-64.0312	-57.4062	-58.5625	-64.3438	-64.625	-59.75	-58.8125
		0.16	3.38	-56.6562	-62.7188	-55.7188	-53.9375	-55.1562	-55.875	-62.6875	-63.125	-63	-56.0625	-64.0625	-64.0625	-57.4688	-58.4688	-64.5	-64.625	-59.875	-58.9062
		0.16	3.4	-56.6562	-62.6875	-55.75	-54.0938	-55.2812	-55.9062	-62.7812	-63.2188	-62.9688	-56.0938	-64.1562	-64.1875	-57.4375	-58.5625	-64.6875	-64.5312	-59.9062	-58.9688
		0.16	3.42	-56.6875	-62.75	-55.7188	-54.2812	-55.25	-55.9062	-62.75	-63.1562	-63	-56.1562	-64.125	-64.1562	-57.4688	-58.7188	-64.5312	-64.7812	-59.9062	-59.0312
		0.16	3.44	-56.8438	-62.875	-55.7812	-54.1875	-55.25	-55.9688	-62.8438	-63.2188	-63.1562	-56.2812	-64.2812	-64.1875	-57.5938	-58.7188	-64.6562	-64.7188	-59.9688	-59
		0.16	3.46	-56.8438	-62.75	-55.7812	-54.2812	-55.3125	-55.9062	-62.9375	-63.25	-63.1875	-56.3125	-64.3125	-64.2188	-57.7188	-58.6562	-64.6875	-64.8125	-60.0938	-59.125
		0.16	3.48	-56.8125	-62.875	-55.8438	-54.4688	-55.3125	-56	-62.7812	-63.3125	-63.1562	-56.3125	-64.25	-64.2812	-57.625	-58.7812	-64.6562	-64.875	-60	-59.125
		0.16	3.5	-57	-63	-55.9062	-54.4375	-55.375	-56.0938	-62.9375	-63.3438	-63.2188	-56.4062	-64.375	-64.375	-57.7188	-58.8125	-64.7812	-64.9375	-60.0625	-59.1562
		0.16	3.52	-56.9688	-62.9375	-55.9062	-54.4375	-55.4375	-56	-63.0938	-63.4375	-63.25	-56.4688	-64.4375	-64.4062	-57.75	-58.7812	-64.8438	-65.0312	-60.0938	-59.2812
		0.16	3.54	-56.9375	-63.0625	-56.0312	-54.5312	-55.5	-55.9688	-63.0938	-63.4688	-63.375	-56.4062	-64.4062	-64.4375	-57.7812	-58.8125	-64.875	-65.0312	-60.25	-59.2812
		0.16	3.56	-57.0312	-63.0938	-56.125	-54.5938	-55.625	-56.0625	-63.1562	-63.5625	-63.375	-56.5	-64.4688	-64.5312	-57.8438	-58.875	-64.8438	-65.0625	-60.2188	-59.375
		0.16	3.58	-57.0312	-63.0938	-56.125	-54.5625	-55.6562	-56.0312	-63.2188	-63.6875	-63.375	-56.5312	-64.5312	-64.5625	-57.9375	-58.9062	-64.9688	-65.0625	-60.2812	-59.375
		0.16	3.6	-57	-63.2188	-56.1562	-54.6875	-55.75	-56.1562	-63.2188	-63.75	-63.5	-56.5625	-64.5625	-64.5938	-57.9375	-58.9375	-64.9688	-65.125	-60.2812	-59.4062
		0.16	3.62	-57.0625	-63.25	-56.1562	-54.8125	-55.7812	-56.1562	-63.2812	-63.7188	-63.4375	-56.625	-64.625	-64.6562	-57.8438	-59.0625	-65	-65.1875	-60.3438	-59.4375
		0.16	3.64	-57.2188	-63.3438	-56.1875	-54.75	-55.8438	-56.2188	-63.375	-63.8125	-63.5625	-56.7188	-64.6562	-64.6562	-58.0938	-59.0312	-65.1875	-65.1562	-60.3125	-59.4688
		0.16	3.66	-57.1562	-63.4062	-56.1875	-54.9062	-55.9062	-56.1875	-63.375	-63.875	-63.625	-56.6875	-64.7188	-64.7812	-58	-59	-65.1562	-65.2188	-60.4062	-59.625
		0.16	3.68	-57.1562	-63.3438	-56.2188	-55	-55.9062	-56.1875	-63.3438	-63.8125	-63.5625	-56.6875	-64.7812	-64.9062	-58	-59.1562	-65.1562	-65.3125	-60.4375	-59.5
		0.16	3.7	-57.25	-63.5	-56.2812	-55	-55.9375	-56.2188	-63.4375	-63.9375	-63.625	-56.7812	-64.8125	-64.9062	-58.125	-59.1562	-65.1875	-65.3438	-60.4062	-59.625
		0.16	3.72	-57.3438	-63.4688	-56.3438	-55.0312	-55.9688	-56.25	-63.4688	-64.0312	-63.75	-56.8125	-64.875	-64.9375	-58.1875	-59.125	-65.2188	-65.4062	-60.4688	-59.625
		0.16	3.74	-57.375	-63.4688	-56.4062	-55.0312	-56.0312	-56.2812	-63.5	-64.0312	-63.7188	-56.75	-64.8438	-64.9375	-58.0938	-59.125	-65.2812	-65.4688	-60.5	-59.5625
		0.16	3.76	-57.2812	-63.4688	-56.4375	-55.0938	-56.0625	-56.4688	-63.5	-64.0312	-63.875	-56.9062	-64.9375	-65	-58.25	-59.2188	-65.3125	-65.4062	-60.5312	-59.625
		0.16	3.78	-57.375	-63.5938	-56.5	-55.1562	-56.0625	-56.4062	-63.5625	-64.0625	-63.8438	-56.9688	-65	-65.0938	-58.3125	-59.25	-65.375	-65.5	-60.5625	-59.6562
		0.16	3.8	-57.375	-63.6875	-56.5	-55.1562	-56.1875	-56.4062	-63.5625	-64.0938	-64.0312	-56.9688	-64.9688	-65.0938	-58.3125	-59.2812	-65.2812	-65.5312	-60.625	-59.7812
		0.16	3.82	-57.375	-63.6562	-56.4688	-55.25	-56.25	-56.4688	-63.5938	-64.0625	-64.0312	-57	-65.1562	-65.125	-58.3125	-59.375	-65.3438	-65.5625	-60.5938	-59.8125
		0.16	3.84	-57.4688	-63.7188	-56.5625	-55.25	-56.1875	-56.5	-63.6562	-64.1562	-63.9375	-57.125	-65.125	-65.2188	-58.4375	-59.4375	-65.4375	-65.5938	-60.6562	-59.8125
		0.16	3.86	-57.5312	-63.75	-56.5312	-55.2812	-56.2812	-56.5	-63.7188	-64.2188	-64.0312	-57.1562	-65.0938	-65.1875	-58.3438	-59.375	-65.3125	-65.5938	-60.6562	-59.8125
		0.16	3.88	-57.5	-63.7812	-56.6562	-55.2812	-56.2812	-56.5	-63.7188	-64.1875	-64.0312	-57.0938	-65.25	-65.2188	-58.5	-59.5	-65.4375	-65.7188	-60.75	-59.9375
		0.16	3.9	-57.5	-63.9062	-56.625	-55.375	-56.3125	-56.5312	-63.6875	-64.3125	-64.0312	-57.125	-65.25	-65.2812	-58.5	-59.5	-65.5	-65.6875	-60.6875	-60
		0.16	3.92	-57.5	-64.0312	-56.6562	-55.375	-56.4062	-56.5625	-63.8125	-64.375	-64.125	-57.1562	-65.2812	-65.2812	-58.5	-59.5	-65.4688	-65.7188	-60.75	-60
		0.16	3.94	-57.5	-63.875	-56.7188	-55.4375	-56.4688	-56.6562	-63.875	-64.3438	-64.1562	-57.2188	-65.3438	-65.4062	-58.5	-59.5	-65.5938	-65.75	-60.7812	-60.0312
		0.16	3.96	-57.5312	-64.0312	-56.7188	-55.4688	-56.4688	-56.6875	-63.875	-64.4688	-64.2812	-57.2188	-65.375	-65.3125	-58.4688	-59.5938	-65.625	-65.7188	-60.7812	-60.125
		0.16	3.98	-57.6562	-64.1562	-56.7188	-55.5312	-56.4062	-56.6562	-63.9375	-64.5	-64.2188	-57.1875	-65.4375	-65.375	-58.5	-59.5625	-65.5938	-65.8125	-60.6875	-60.0938
		0.16	4	-57.625	-64.0938	-56.8125	-55.5312	-56.4375	-56.7188	-63.9062	-64.5	-64.3438	-57.1875	-65.5	-65.5312	-58.5938	-59.5625	-65.5938	-65.8125	-60.75	-60.0938
		0.16	4.02	-57.5625	-64.0625	-56.8125	-55.5938	-56.4688	-56.75	-64.0312	-64.5625	-64.4375	-57.3125	-65.5625	-65.4688	-58.625	-59.6562	-65.625	-65.875	-60.8438	-60.0312
		0.16	4.04	-57.5938	-64.1562	-56.8125	-55.5625	-56.4062	-56.7188	-64.0312	-64.6875	-64.375	-57.375	-65.5312	-65.5	-58.625	-59.6562	-65.6562	-65.9062	-60.7812	-60.1562
		0.16	4.06	-57.75	-64.2188	-56.8125	-55.5625	-56.5	-56.75	-64.0312	-64.7188	-64.4062	-57.4062	-65.5938	-65.625	-58.6562	-59.5938	-65.6875	-66.0312	-60.8438	-60.1875
		0.16	4.08	-57.7188	-64.3125	-56.875	-55.6875	-56.625	-56.8125	-64.0625	-64.6875	-64.4062	-57.4375	-65.5938	-65.625	-58.6875	-59.6562	-65.7188	-65.9688	-60.9375	-60.25
		0.16	4.1	-57.7188	-64.3125	-56.9688	-55.7812	-56.5938	-56.875	-64.0938	-64.75	-64.4688	-57.5312	-65.5938	-65.7188	-58.7188	-59.6875	-65.7188	-66.0625	-61	-60.2188
		0.16	4.12	-57.8125	-64.4375	-56.9062	-55.8125	-56.5625	-56.875	-64.1562	-64.8125	-64.5625	-57.4688	-65.5938	-65.7812	-58.6562	-59.75	-65.8125	-66.0938	-61.0312	-60.25
		0.16	4.14	-57.7812	-64.4062	-56.9375	-55.9375	-56.6562	-56.9688	-64.2188	-64.8125	-64.5938	-57.4375	-65.6875	-65.7188	-58.7812	-59.6875	-65.875	-66.125	-61.0938	-60.375
		0.16	4.16	-57.8125	-64.375	-57	-55.9688	-56.625	-56.8125	-64.3125	-64.9062	-64.75	-57.5625	-65.6875	-65.8125	-58.7812	-59.75	-65.875	-66.1562	-61.125	-60.2812
		0.16	4.18	-57.8438	-64.4688	-57	-55.875	-56.6562	-56.8438	-64.3438	-64.9062	-64.7188	-57.625	-65.7188	-65.8438	-58.7812	-59.9062	-65.875	-66.3125	-61.125	-60.4062
		0.16	4.2	-57.8438	-64.5	-57.0938	-55.9688	-56.8125	-56.875	-64.4375	-65.0312	-64.8125	-57.625	-65.8438	-65.8438	-58.875	-59.8125	-65.9375	-66.3125	-61.0938	-60.375
		0.16	4.22	-57.9062	-64.5625	-57.125	-55.9375	-56.6875	-56.9688	-64.4375	-65	-64.875	-57.6875	-65.8438	-66.0312	-58.875	-59.875	-65.9688	-66.2812	-61.125	-60.4062
		0.16	4.24	-57.9375	-64.5938	-57.0312	-56.0312	-56.6875	-56.9688	-64.4688	-65.0625	-64.9062	-57.6562	-65.8125	-65.9375	-58.8438	-59.9062	-66	-66.3125	-61.1562	-60.375
		0.16	4.26	-57.9688	-64.5938	-57.1562	-56.0938	-56.7812	-57	-64.5	-65.1562	-64.875	-57.6562	-65.9375	-65.9062	-59	-59.9688	-66.0312	-66.375	-61.1875	-60.4688
		0.16	4.28	-57.9688	-64.625	-57.125	-56.0312	-56.8125	-56.9688	-64.5312	-65.0625	-64.9375	-57.625	-65.9375	-66.0312	-59.0312	-59.9375	-65.9688	-66.3438	-61.1875	-60.5
		0.16	4.3	-57.9688	-64.625	-57.0625	-56.125	-56.8438	-56.9375	-64.5625	-65.1875	-65.0312	-57.7812	-66	-66.0312	-58.9688	-60	-65.9375	-66.4375	-61.1875	-60.4062
		0.16	4.32	-58	-64.6562	-57.1562	-56.0938	-56.875	-57	-64.5938	-65.2188	-64.9375	-57.8125	-66.0312	-66.0312	-59	-60.0312	-66.0938	-66.5	-61.2812	-60.5312
		0.16	4.34	-58.0312	-64.75	-57.1875	-56.1562	-56.8438	-57.0625	-64.6562	-65.2188	-65.0625	-57.75	-66.0625	-66.125	-59	-60	-66.0312	-66.5	-61.1875	-60.5625
		0.16	4.36	-58.0312	-64.7188	-57.2188	-56.2188	-56.875	-57.0312	-64.625	-65.25	-65.0312	-57.875	-66.0625	-66.1562	-59	-59.9688	-66.0312	-66.4688	-61.2188	-60.4688
		0.16	4.38	-58.0625	-64.6875	-57.1562	-56.2812	-56.875	-57.0625	-64.7812	-65.2812	-65	-57.875	-66	-66.1562	-58.9375	-60.0312	-66.1562	-66.5938	-61.3125	-60.5
		0.16	4.4	-58.0625	-64.7812	-57.1562	-56.25	-56.9688	-57.125	-64.6562	-65.3125	-65.0938	-57.9062	-66.1562	-66.25	-59.0625	-60.0938	-66.1562	-66.625	-61.2812	-60.5312
		0.16	4.42	-58	-64.8125	-57.25	-56.25	-56.9062	-57.0938	-64.9062	-65.3438	-65.1562	-57.875	-66.1562	-66.1875	-59.125	-60.0625	-66.0938	-66.5312	-61.2812	-60.5312
		0.16	4.44	-58.0312	-64.8125	-57.2812	-56.4062	-56.9375	-57.1562	-64.8438	-65.5	-65.25	-57.9375	-66.1562	-66.2812	-59.0938	-60.0938	-66.1562	-66.6562	-61.3438	-60.5312
		0.16	4.46	-58.0625	-64.875	-57.2188	-56.3125	-57	-57.2188	-64.8438	-65.4062	-65.2812	-57.9062	-66.25	-66.375	-59.1562	-60.0938	-66.1875	-66.6562	-61.4062	-60.5625
		0.16	4.48	-58.0312	-65	-57.3125	-56.2812	-57	-57.25	-64.9062	-65.4062	-65.2812	-58	-66.2188	-66.3125	-59.1875	-60.0625	-66.1875	-66.6562	-61.375	-60.5312
		0.16	4.5	-57.9688	-64.9375	-57.3438	-56.375	-56.9062	-57.25	-64.9688	-65.5312	-65.2188	-58.0938	-66.2812	-66.375	-59.125	-60.1562	-66.2812	-66.5938	-61.2812	-60.5625
		0.16	4.52	-58.0312	-65	-57.4062	-56.5	-57.0312	-57.2188	-64.9062	-65.5312	-65.3125	-58	-66.2812	-66.4375	-59.2188	-60.2188	-66.3125	-66.6562	-61.3125	-60.6562
		0.16	4.54	-58.0625	-65.0938	-57.375	-56.4688	-57	-57.3125	-65.0625	-65.5	-65.4062	-58.0312	-66.3125	-66.4688	-59.2812	-60.1875	-66.2188	-66.7812	-61.25	-60.625
		0.16	4.56	-57.9375	-65.0625	-57.2812	-56.5	-57.0312	-57.1562	-65.0938	-65.5625	-65.3438	-58.0938	-66.25	-66.5	-59.2812	-60.0938	-66.25	-66.7188	-61.1562	-60.625
		0.16	4.58	-57.9688	-65.0312	-57.4375	-56.5312	-57.0312	-57.25	-65.0938	-65.6562	-65.4062	-58.125	-66.375	-66.5625	-59.25	-60.1875	-66.3438	-66.8438	-61.1875	-60.6875
		0.16	4.6	-58	-65.0938	-57.4062	-56.4688	-57.1562	-57.3125	-65.2188	-65.625	-65.5	-58	-66.375	-66.5	-59.3438	-60.3125	-66.3438	-66.8125	-61.1875	-60.6875
		0.16	4.62	-58.0312	-65.0938	-57.4375	-56.5312	-57.0625	-57.3125	-65.1562	-65.625	-65.4688	-58.1562	-66.3438	-66.625	-59.25	-60.2188	-66.4062	-66.7812	-61.0938	-60.5625
		0.16	4.64	-57.9375	-65.1875	-57.5312	-56.5625	-57.125	-57.4062	-65.0938	-65.75	-65.4375	-58.1875	-66.4062	-66.6562	-59.3125	-60.25	-66.4688	-66.875	-61.0312	-60.6875
		0.16	4.66	-58.0312	-65.1875	-57.4375	-56.5625	-57.2188	-57.3438	-65.2812	-65.7188	-65.5	-58.1562	-66.5312	-66.6562	-59.4062	-60.3125	-66.5	-66.9375	-61.125	-60.6875
		0.16	4.68	-58.0625	-65.2812	-57.4375	-56.625	-57.1562	-57.4062	-65.3125	-65.7188	-65.5312	-58.1875	-66.5	-66.7188	-59.3438	-60.2188	-66.4688	-66.875	-61	-60.6562
		0.16	4.7	-58	-65.3438	-57.5625	-56.5938	-57.0938	-57.4062	-65.3125	-65.75	-65.5938	-58.25	-66.4688	-66.6875	-59.4062	-60.2812	-66.5	-66.9062	-61.0312	-60.7812
		0.16	4.72	-58	-65.375	-57.4688	-56.7188	-57.1562	-57.4375	-65.4062	-65.7812	-65.5625	-58.2812	-66.625	-66.6875	-59.5	-60.3438	-66.5312	-66.9375	-60.9375	-60.8125
		0.16	4.74	-58.0625	-65.375	-57.5	-56.6875	-57.0625	-57.4375	-65.4062	-65.75	-65.5938	-58.2812	-66.5938	-66.6875	-59.375	-60.375	-66.5	-66.9062	-61.0312	-60.6875
		0.16	4.76	-58.0312	-65.375	-57.5312	-56.6562	-57.2188	-57.3125	-65.4375	-65.7188	-65.5312	-58.3438	-66.6562	-66.6875	-59.4688	-60.3438	-66.5625	-66.9688	-61	-60.8125
		0.16	4.78	-58	-65.3438	-57.5312	-56.75	-57.25	-57.375	-65.4688	-65.8438	-65.6562	-58.375	-66.6562	-66.6875	-59.5312	-60.3125	-66.625	-67.0625	-60.9688	-60.875
		0.16	4.8	-58.0625	-65.375	-57.5	-56.7812	-57.1875	-57.5	-65.5	-65.8438	-65.6875	-58.2812	-66.6562	-66.7812	-59.4688	-60.4375	-66.5625	-67.0625	-60.9688	-60.875
		0.16	4.82	-58.1562	-65.4375	-57.5312	-56.75	-57.1875	-57.4688	-65.5	-65.8125	-65.7188	-58.375	-66.7812	-66.6875	-59.4375	-60.4062	-66.625	-67.0312	-60.9375	-60.8125
		0.16	4.84	-58.0938	-65.5	-57.5938	-56.7188	-57.25	-57.5	-65.5625	-65.9062	-65.7812	-58.4375	-66.8125	-66.6562	-59.5	-60.4062	-66.625	-67.0625	-60.9688	-60.9062
		0.16	4.86	-58.1562	-65.4375	-57.5938	-56.8438	-57.3438	-57.4688	-65.6875	-65.9688	-65.6562	-58.375	-66.7812	-66.75	-59.5312	-60.4375	-66.5938	-67.1562	-61	-60.875
		0.16	4.88	-58.0938	-65.4062	-57.625	-56.9062	-57.3125	-57.5625	-65.625	-65.875	-65.7188	-58.4375	-66.7812	-66.7188	-59.5312	-60.4375	-66.5938	-67.0625	-60.9688	-60.8125
		0.16	4.9	-58.1562	-65.5	-57.6562	-56.8125	-57.375	-57.4688	-65.625	-66.0625	-65.8438	-58.4688	-66.8438	-66.6562	-59.5938	-60.4375	-66.6875	-67.0625	-60.9375	-60.875
		0.16	4.92	-58.125	-65.5	-57.7188	-56.9688	-57.375	-57.5312	-65.6562	-66.0625	-65.8438	-58.4375	-66.9688	-66.75	-59.6562	-60.4062	-66.75	-67.1562	-60.9062	-60.9375
		0.16	4.94	-58.2188	-65.5312	-57.5312	-56.9062	-57.375	-57.5625	-65.6875	-66.0625	-65.9062	-58.4375	-66.8438	-66.625	-59.6562	-60.5	-66.6875	-67.1875	-61	-60.875
		0.16	4.96	-58.2812	-65.625	-57.6562	-56.8438	-57.4375	-57.5938	-65.8125	-66.0625	-65.9688	-58.5	-66.9375	-66.5938	-59.6562	-60.5	-66.7188	-67.1562	-61	-60.9688
		0.16	4.98	-58.2812	-65.5938	-57.6562	-56.875	-57.4375	-57.5312	-65.7812	-66.0938	-66	-58.5625	-66.9688	-66.6562	-59.7188	-60.375	-66.8438	-67.2812	-61	-60.9688
		0.26	0	-60.3438	-60.5312	-60.0625	-59.625	-61.3125	-61.4688	-61.4375	-61.9375	-62.6562	-62.4688	-62.25	-62.7812	-63.4375	-63.5625	-63.5625	-63.8125
		0.26	0.02	-60.3438	-60.5	-60.125	-59.5938	-61.3438	-61.375	-61.375	-61.9688	-62.6562	-62.5	-62.1562	-62.8438	-63.4688	-63.5625	-63.5938	-63.9375
		0.26	0.04	-60.375	-60.5	-60.1875	-59.6562	-61.375	-61.5	-61.3438	-61.875	-62.7188	-62.5312	-62.1875	-62.7812	-63.4375	-63.5	-63.5312	-63.8438
		0.26	0.06	-60.3438	-60.5	-60.1875	-59.7188	-61.4375	-61.5	-61.4062	-61.9062	-62.6875	-62.4375	-62.25	-62.8438	-63.4688	-63.5938	-63.5	-63.9375
		0.26	0.08	-60.4062	-60.5	-60.125	-59.6562	-61.375	-61.4062	-61.4062	-61.9688	-62.7188	-62.4062	-62.1562	-62.7812	-63.4688	-63.5625	-63.5312	-64.0312
		0.26	0.1	-60.3125	-60.4062	-60.1562	-59.6562	-61.3438	-61.4062	-61.4375	-61.9375	-62.7812	-62.5	-62.1562	-62.8125	-63.5625	-63.5	-63.5938	-63.8438
		0.26	0.12	-60.3125	-60.4062	-60.1562	-59.75	-61.4062	-61.4688	-61.4062	-61.9062	-62.75	-62.375	-62.1562	-62.8438	-63.5	-63.5938	-63.5	-63.9062
		0.26	0.14	-60.3125	-60.4062	-60.1562	-59.6875	-61.4375	-61.3438	-61.5	-62	-62.6875	-62.375	-62.125	-62.8438	-63.4375	-63.5	-63.5312	-64.0312
		0.26	0.16	-60.3125	-60.4688	-60.0625	-59.6562	-61.3125	-61.3438	-61.4688	-62	-62.75	-62.4688	-62.0625	-62.75	-63.5312	-63.5312	-63.625	-63.9062
		0.26	0.18	-60.2812	-60.4688	-60.0938	-59.7188	-61.3438	-61.5	-61.4375	-61.8125	-62.6875	-62.5	-62.125	-62.8438	-63.5312	-63.4375	-63.5938	-63.9375
		0.26	0.2	-60.3125	-60.5	-60.0312	-59.6875	-61.375	-61.4062	-61.5	-61.9375	-62.7812	-62.375	-62.125	-62.8438	-63.4688	-63.5312	-63.5625	-63.9688
		0.26	0.22	-60.2812	-60.5	-60.0312	-59.6562	-61.2812	-61.3125	-61.5	-61.9688	-62.7812	-62.5	-62.1562	-62.8125	-63.5	-63.625	-63.5938	-63.9375
		0.26	0.24	-60.3438	-60.4688	-60	-59.7188	-61.3438	-61.4688	-61.4062	-61.8125	-62.5938	-62.5	-62.125	-62.7812	-63.5	-63.5312	-63.5938	-63.9062
		0.26	0.26	-60.3438	-60.5	-60.0625	-59.6562	-61.4062	-61.375	-61.375	-61.875	-62.6875	-62.4688	-62.0625	-62.8125	-63.3125	-63.5625	-63.5	-63.9375
		0.26	0.28	-60.125	-60.4375	-59.9375	-59.5312	-61.3125	-61.25	-61.25	-61.7188	-62.625	-62.375	-62	-62.6562	-63.4688	-63.4688	-63.375	-63.7812
		0.26	0.3	-60.9375	-61.0938	-60.5938	-60.3438	-61.8438	-61.9375	-61.875	-62.3438	-63.1562	-63.0625	-62.7188	-63.3438	-64.0312	-64.0938	-64.0938	-64.5
		0.26	0.32	-64.8438	-64.9375	-64.625	-64.2812	-65.7188	-65.75	-65.6562	-66.1562	-67.2188	-66.9375	-66.5938	-67.4375	-67.6562	-67.75	-67.8125	-68.125
		0.26	0.34	-67.4688	-67.625	-67.2812	-66.7812	-68.3438	-68.3125	-68.4062	-68.9375	-70.0312	-69.875	-69.5938	-70.2812	-70.4062	-70.4062	-70.375	-70.7812
		0.26	0.36	-67.4375	-67.6875	-67.25	-66.8438	-68.4062	-68.4062	-68.4062	-68.9375	-70	-70	-69.5312	-70.1875	-70.4375	-70.5312	-70.5625	-70.9062
		0.26	0.38	-66.5312	-66.6562	-66.3438	-65.8438	-67.4375	-67.5938	-67.4688	-68.0938	-69.1562	-68.8438	-68.5312	-69.2812	-69.625	-69.7188	-69.75	-70.0938
		0.26	0.4	-65.3438	-65.4688	-65.2188	-64.6562	-66.3438	-66.375	-66.4062	-66.9375	-67.8438	-67.625	-67.375	-68.1562	-68.5312	-68.5938	-68.5312	-68.9688
		0.26	0.42	-64.3125	-64.5	-64.1562	-63.6562	-65.4062	-65.5312	-65.4688	-65.9062	-66.7188	-66.5625	-66.2812	-66.9375	-67.5312	-67.5938	-67.5312	-67.9688
		0.26	0.44	-63.4375	-63.7188	-63.2812	-62.8438	-64.4688	-64.6875	-64.5625	-64.9688	-65.8438	-65.6875	-65.2812	-66.0312	-66.5938	-66.7188	-66.7188	-67.0938
		0.26	0.46	-62.875	-62.9688	-62.625	-62.0938	-63.8438	-64.0312	-63.9375	-64.3438	-65.1875	-64.9375	-64.6562	-65.3438	-66.0312	-66.0312	-66.0312	-66.4062
		0.26	0.48	-62.3438	-62.5	-62.1562	-61.6875	-63.4062	-63.4688	-63.4062	-63.9688	-64.5312	-64.4375	-64.125	-64.8125	-65.5312	-65.5	-65.4688	-65.9062
		0.26	0.5	-61.9688	-62.0625	-61.6562	-61.3125	-63.0312	-63.1562	-63.0938	-63.4688	-64.2188	-64.125	-63.7188	-64.375	-65.0312	-65.1562	-65.2188	-65.4375
		0.26	0.52	-61.6875	-61.75	-61.375	-60.9375	-62.6875	-62.7812	-62.8125	-63.1875	-64.0312	-63.75	-63.4375	-64.0625	-64.7812	-64.9375	-64.9062	-65.2188
		0.26	0.54	-61.5	-61.5938	-61.1875	-60.75	-62.5312	-62.5312	-62.5938	-63.0312	-63.7188	-63.5	-63.2812	-63.7188	-64.5938	-64.625	-64.625	-65.0625
		0.26	0.56	-61.2188	-61.4375	-61	-60.5938	-62.375	-62.4062	-62.3438	-62.8438	-63.625	-63.4688	-63.0312	-63.5938	-64.3125	-64.5	-64.5312	-64.875
		0.26	0.58	-61.0625	-61.3438	-60.8125	-60.4688	-62.1875	-62.2812	-62.1875	-62.6562	-63.5	-63.3125	-62.9688	-63.5	-64.25	-64.4062	-64.3438	-64.6875
		0.26	0.6	-60.9688	-61.2188	-60.8438	-60.375	-62.0625	-62.0938	-62.125	-62.5625	-63.2812	-63.1875	-62.8438	-63.4375	-64.1562	-64.1875	-64.25	-64.5625
		0.26	0.62	-60.875	-61.0625	-60.75	-60.3125	-61.875	-62.0312	-62.0625	-62.5312	-63.3125	-63.1562	-62.6875	-63.375	-64.0625	-64.2188	-64.1875	-64.5
		0.26	0.64	-60.8125	-60.9375	-60.6875	-60.1562	-61.875	-61.9062	-61.9688	-62.4062	-63.2188	-63.0938	-62.6562	-63.4062	-64.0312	-64.0938	-64.0938	-64.3438
		0.26	0.66	-60.7812	-60.9375	-60.5938	-60.1875	-61.75	-61.8438	-61.8125	-62.375	-63	-62.9375	-62.5938	-63.25	-64.0312	-64.0312	-64.0312	-64.4062
		0.26	0.68	-60.7188	-60.9375	-60.6562	-60.0625	-61.75	-61.7812	-61.8125	-62.375	-63.0938	-62.9375	-62.5	-63.1875	-63.8438	-64.0312	-63.9688	-64.3125
		0.26	0.7	-60.625	-60.8125	-60.5	-60.0312	-61.7188	-61.8125	-61.9062	-62.25	-63.0625	-62.9375	-62.5625	-63.0938	-63.9062	-64.0312	-64.0625	-64.2812
		0.26	0.72	-60.5625	-60.8125	-60.375	-60	-61.6562	-61.7188	-61.75	-62.2188	-62.875	-62.8125	-62.5	-63.0625	-63.9375	-63.9688	-63.9688	-64.2812
		0.26	0.74	-60.5938	-60.7812	-60.5	-60	-61.5938	-61.6875	-61.6562	-62.2188	-63.0312	-62.75	-62.4688	-62.9688	-63.8438	-64.0312	-63.9375	-64.1875
		0.26	0.76	-60.5312	-60.7812	-60.5	-59.9375	-61.5938	-61.7188	-61.6562	-62.2188	-62.9688	-62.8125	-62.4375	-63	-63.6875	-63.8438	-63.9062	-64.2188
		0.26	0.78	-60.5	-60.75	-60.3438	-60	-61.5938	-61.6875	-61.7188	-62.0938	-62.9688	-62.75	-62.5	-63	-63.8438	-63.875	-63.875	-64.1875
		0.26	0.8	-60.5312	-60.7188	-60.4375	-59.9688	-61.5	-61.6875	-61.6875	-62.0938	-62.9062	-62.6562	-62.4062	-62.9688	-63.6875	-63.875	-63.7812	-64.1562
		0.26	0.82	-60.4375	-60.6562	-60.4688	-59.875	-61.5	-61.5938	-61.7188	-62.0938	-62.9375	-62.6562	-62.375	-62.9375	-63.6875	-63.7812	-63.875	-64.1875
		0.26	0.84	-60.4375	-60.625	-60.3125	-59.9062	-61.5312	-61.5938	-61.6875	-62	-62.9375	-62.7812	-62.3438	-63	-63.7812	-63.75	-63.8438	-64.0938
		0.26	0.86	-60.5	-60.625	-60.3125	-59.7812	-61.5	-61.5	-61.625	-61.9375	-63	-62.6562	-62.3125	-62.9062	-63.6875	-63.9062	-63.7188	-64.0312
		0.26	0.88	-60.4062	-60.5938	-60.4375	-59.875	-61.5312	-61.5	-61.5938	-61.9688	-62.75	-62.6562	-62.3125	-62.875	-63.6875	-63.75	-63.7188	-64.0938
		0.26	0.9	-60.375	-60.625	-60.3125	-59.8438	-61.4688	-61.5938	-61.625	-62	-62.8125	-62.6875	-62.3125	-63	-63.6875	-63.75	-63.6875	-64.0625
		0.26	0.92	-60.4375	-60.6562	-60.2812	-59.875	-61.5312	-61.5625	-61.6875	-61.9375	-62.8125	-62.6562	-62.2812	-62.8438	-63.6875	-63.8125	-63.5938	-64.0312
		0.26	0.94	-60.375	-60.5625	-60.3125	-59.8125	-61.5	-61.5	-61.625	-62	-62.7188	-62.5938	-62.2812	-62.8125	-63.625	-63.75	-63.7188	-64.1562
		0.26	0.96	-60.4375	-60.625	-60.3438	-59.8125	-61.4688	-61.5312	-61.5312	-61.9688	-62.8125	-62.625	-62.375	-62.8125	-63.6562	-63.8438	-63.7812	-64.0312
		0.26	0.98	-60.375	-60.5938	-60.2812	-59.8438	-61.5938	-61.5938	-61.5312	-61.9375	-62.8438	-62.6562	-62.3125	-62.9062	-63.7188	-63.8125	-63.6875	-64.0312
		0.26	1	-60.4688	-60.75	-60.4688	-59.9688	-61.7188	-61.6562	-61.6875	-62.0625	-62.7812	-62.5625	-62.3125	-62.7812	-63.6875	-63.6875	-63.75	-64.0625
		0.26	1.02	-60.625	-60.9375	-60.625	-60.0625	-61.75	-61.8438	-61.75	-62.1875	-62.75	-62.6562	-62.25	-62.75	-63.6562	-63.75	-63.6875	-64.0625
		0.26	1.04	-60.8438	-61.0312	-60.6875	-60.1562	-61.9688	-61.9688	-61.9688	-62.375	-62.8125	-62.6875	-62.2812	-62.8438	-63.6562	-63.8438	-63.6875	-64.125
		0.26	1.06	-61	-61.25	-60.9062	-60.5312	-62.25	-62.1875	-62.25	-62.6562	-62.7812	-62.5938	-62.3125	-62.8438	-63.7812	-63.8438	-63.9062	-64.1562
		0.26	1.08	-61.25	-61.4688	-61.1875	-60.6562	-62.375	-62.5	-62.5312	-62.9688	-62.8438	-62.7812	-62.375	-62.9062	-63.75	-63.875	-63.9688	-64.2812
		0.26	1.1	-61.4688	-61.6562	-61.4375	-60.75	-62.5625	-62.5938	-62.75	-63.0938	-63	-62.875	-62.4375	-63	-64.0312	-64.0312	-64.0312	-64.4062
		0.26	1.12	-61.625	-61.9375	-61.6562	-60.9375	-62.9375	-62.9062	-63.0312	-63.3125	-63	-63	-62.4375	-63.0625	-64.0938	-64.1562	-64.25	-64.5625
		0.26	1.14	-61.8438	-62.3125	-61.9062	-61	-63.0938	-63.125	-63.3438	-63.5	-63	-63.0938	-62.75	-63.2188	-64.1875	-64.3438	-64.375	-64.7188
		0.26	1.16	-62	-62.4062	-62.2812	-61.1875	-63.2812	-63.3125	-63.6875	-63.6562	-63.125	-63.2188	-62.9062	-63.375	-64.4375	-64.5	-64.5312	-64.9062
		0.26	1.18	-62	-62.6562	-62.5	-61.2812	-63.5938	-63.5625	-64.0312	-63.7188	-63.0938	-63.3438	-62.9375	-63.5312	-64.5625	-64.5	-64.8125	-65.0938
		0.26	1.2	-62.0938	-62.8438	-62.8125	-61.3438	-63.7812	-63.75	-64.2188	-63.8438	-63.0938	-63.5	-63.2812	-63.6562	-64.6875	-64.5938	-64.875	-65.2188
		0.26	1.22	-62.1875	-63	-62.9062	-61.2812	-63.9062	-63.9062	-64.375	-64.0312	-63.1875	-63.5	-63.2188	-63.9375	-64.9062	-64.6562	-65	-65.2188
		0.26	1.24	-62.2812	-63.1875	-63.1562	-61.2812	-64.0938	-64.1875	-64.5312	-64.0312	-63.1875	-63.6562	-63.3125	-64.0938	-64.9688	-64.6875	-65.125	-65.3125
		0.26	1.26	-62.375	-63.2812	-63.25	-61.2188	-64.25	-64.2812	-64.7812	-64.0312	-62.9688	-63.5938	-63.4062	-64.25	-65	-64.625	-65.0938	-65.375
		0.26	1.28	-62.1875	-63.3125	-63.4375	-61.1875	-64.2812	-64.4688	-64.9062	-64.125	-62.9062	-63.5625	-63.375	-64.4062	-65.125	-64.6562	-65.3125	-65.375
		0.26	1.3	-62	-63.3438	-63.3438	-61	-64.25	-64.5625	-65	-64.0938	-62.75	-63.4062	-63.3438	-64.5625	-65.0938	-64.4062	-65.1875	-65.2812
		0.26	1.32	-61.9062	-63.3438	-63.2188	-60.7188	-64.2188	-64.5312	-65.0625	-64.0312	-62.5938	-63.2812	-63.2188	-64.5312	-65	-64.2812	-65.0312	-65.1562
		0.26	1.34	-61.625	-63.0938	-63.0625	-60.5312	-64.0312	-64.3438	-65	-64.0312	-62.4062	-63	-62.9375	-64.5	-64.7812	-64.0312	-64.8438	-64.8125
		0.26	1.36	-61.0938	-62.9375	-62.75	-60.1562	-63.75	-64.0312	-64.875	-64.0312	-62.0938	-62.5625	-62.5625	-64.4688	-64.5938	-63.4062	-64.4688	-64.4688
		0.26	1.38	-60.5312	-62.5938	-62.375	-59.625	-63.375	-63.375	-64.7188	-63.5938	-61.5312	-62.1562	-62.0938	-64.2188	-64.1562	-62.875	-64.0312	-63.9375
		0.26	1.4	-59.9062	-62.0938	-61.8438	-59.0625	-62.8438	-62.5938	-64.4062	-63.1562	-61.0312	-61.625	-61.5	-63.75	-63.5	-62.1875	-63.5	-63.4062
		0.26	1.42	-59.0938	-61.4062	-61.2812	-58.3438	-62.1875	-61.75	-63.875	-62.625	-60.4375	-60.9375	-60.6562	-63.1562	-62.7812	-61.375	-62.8438	-62.75
		0.26	1.44	-58.2812	-60.9688	-60.7812	-57.5625	-61.3438	-60.8438	-63.3438	-62.0938	-59.625	-60.2188	-59.7812	-62.375	-61.9375	-60.625	-62.1562	-61.875
		0.26	1.46	-57.4062	-60.2188	-60.125	-56.6875	-60.5938	-59.9375	-62.5625	-61.25	-58.875	-59.5	-58.6562	-61.4062	-60.7812	-60.0625	-61.2812	-61
		0.26	1.48	-56.4688	-59.5938	-59.25	-55.6562	-59.75	-58.9062	-61.7812	-60.5312	-57.875	-58.8438	-57.4688	-60.3125	-59.6562	-59.1875	-60.4062	-60.0938
		0.26	1.5	-55.5625	-59	-58.5625	-54.7812	-58.9375	-57.8125	-60.9062	-59.875	-56.8125	-58	-56.1875	-59.3125	-58.5	-58.4062	-59.4375	-59.0312
		0.26	1.52	-54.625	-58.25	-57.875	-53.7812	-58.125	-57.0625	-59.9062	-59.125	-55.8125	-57.2812	-54.9375	-58.25	-57.2188	-57.6562	-58.5312	-58.0938
		0.26	1.54	-53.9375	-57.5625	-57.0625	-52.875	-57.375	-56.0312	-58.9375	-58.3438	-54.9688	-56.5312	-53.75	-57.1875	-56.0312	-56.9375	-57.5312	-57.25
		0.26	1.56	-53.2812	-56.9375	-56.3125	-52.0312	-56.5625	-55.1562	-58.0312	-57.75	-54.0312	-55.7188	-52.6562	-56.2812	-54.8438	-56.25	-56.7812	-56.3438
		0.26	1.58	-52.5938	-56.3125	-55.6875	-51.1562	-55.8438	-54.375	-57.0938	-57.0938	-53.0938	-55	-51.4375	-55.25	-53.7188	-55.6562	-56	-55.5
		0.26	1.6	-52	-55.6562	-55.0625	-50.5312	-55.0938	-53.3438	-56.125	-56.4375	-52.2812	-54.5312	-50.375	-54.375	-52.75	-55.0312	-55.25	-54.8438
		0.26	1.62	-51.4688	-55.2812	-54.4062	-49.9062	-54.4375	-52.75	-55.3125	-55.875	-51.4688	-53.9375	-49.5312	-53.5625	-51.8438	-54.5625	-54.75	-54.1562
		0.26	1.64	-51	-54.5938	-53.9062	-49.4062	-53.9062	-52.0625	-54.6562	-55.4688	-50.8125	-53.4375	-48.5938	-52.8438	-50.9688	-54.2188	-54.2188	-53.6562
		0.26	1.66	-50.5312	-54.1875	-53.5	-48.9062	-53.375	-51.4688	-53.875	-55.0938	-50.1875	-53.0938	-47.7188	-52.0312	-50.0938	-53.875	-53.7812	-53.2188
		0.26	1.68	-50.2188	-53.8125	-53.0938	-48.5	-52.8125	-50.9688	-53.3125	-54.6875	-49.5312	-52.7812	-46.9375	-51.5	-49.4688	-53.6562	-53.4375	-52.7188
		0.26	1.7	-49.875	-53.4688	-52.7812	-48.0625	-52.5	-50.4375	-52.75	-54.2812	-48.9688	-52.4688	-45.5312	-50.9688	-48.4375	-53.5	-53.125	-52.3438
		0.26	1.72	-49.625	-53.125	-52.4062	-47.6562	-51.875	-49.9375	-52.2188	-54.125	-48.5	-52.3125	-43.2812	-50.4062	-46.625	-53.3438	-52.9688	-52.0312
		0.26	1.74	-49.4375	-52.9375	-52.1562	-47.2812	-51.5	-49.5	-51.6875	-53.7812	-47.9375	-52.125	-39.7188	-49.9375	-43.7812	-53.2812	-52.7188	-51.8438
		0.26	1.76	-49.1875	-52.6562	-51.875	-46.5938	-51.2188	-49.0625	-51.0938	-53.625	-47.4375	-51.875	-34.7188	-49.5625	-39.7812	-53.1875	-52.5938	-51.4688
		0.26	1.78	-49.0938	-52.3438	-51.5625	-45.2812	-50.875	-48.5312	-50.5938	-53.5	-46.8125	-51.9062	-27.6875	-49.2188	-34.2188	-53.1562	-52.5	-51.3125
		0.26	1.8	-48.9688	-52.2812	-51.4688	-42.8438	-50.6562	-47.7812	-50.25	-53.4062	-45.3125	-51.75	-18.5	-48.9688	-26.7188	-53.0625	-52.375	-51.0938
		0.26	1.82	-48.875	-52.0312	-51.1875	-39.2188	-50.4375	-46.3125	-49.875	-53.3125	-42.5625	-51.7188	-8.28125	-48.6875	-17.5	-53.1875	-52.2812	-50.9688
		0.26	1.84	-48.8125	-51.9688	-51	-34.2812	-50.1562	-43.9062	-49.5312	-53.2188	-38.7812	-51.5625	1.3125	-48.375	-7.6875	-53.1562	-52.375	-50.8438
		0.26	1.86	-48.6562	-51.875	-50.875	-27.5	-50	-40.125	-49.2188	-53.2812	-33.4375	-51.625	8.71875	-48.0938	1	-53.2812	-52.2188	-50.625
		0.26	1.88	-48.5938	-51.75	-50.875	-18.8438	-49.7812	-34.9688	-48.9375	-53.2188	-26.0312	-51.6562	13.0312	-47.7812	7.1875	-53.375	-52.3438	-50.5
		0.26	1.9	-48.5625	-51.6562	-50.6875	-9.21875	-49.5625	-28.1562	-48.5312	-53.125	-16.5938	-51.7188	14.0938	-46.9688	10.4688	-53.375	-52.3438	-50.4062
		0.26	1.92	-48.5	-51.6562	-50.6875	-0.25	-49.4375	-19.2812	-48.1562	-53.125	-6.4375	-51.625	11.875	-45.0312	10.625	-53.5	-52.2812	-50.3125
		0.26	1.94	-48.3438	-51.5938	-50.5938	6.65625	-49.2812	-9.90625	-47.3438	-53.1562	2.78125	-51.75	7.1875	-42.0312	8	-53.6562	-52.375	-50.125
		0.26	1.96	-48.2812	-51.5625	-50.5312	10.875	-49.0625	-1.28125	-45.6562	-53.125	9.6875	-51.8438	0.875	-37.8125	3.21875	-53.7188	-52.375	-50
		0.26	1.98	-48.2188	-51.625	-50.5625	11.9062	-49.0625	5.5	-42.875	-53.125	13.4375	-51.75	-6.46875	-31.8438	-2.84375	-53.9062	-52.4062	-49.9688
		0.26	2	-48.1562	-51.5312	-50.5625	10	-48.9062	9.375	-38.7188	-53.1875	13.875	-51.9062	-14.1562	-24.0312	-9.9375	-54.0625	-52.4688	-50
		0.26	2.02	-48.125	-51.5625	-50.5312	5.75	-48.8125	10.1875	-33.2812	-53.0938	11.2812	-51.9688	-21.7188	-14.4688	-17.25	-54.1875	-52.5	-49.9375
		0.26	2.04	-48.1562	-51.7188	-50.5	-0.125	-48.8125	8.375	-25.8125	-53.0312	6.25	-51.9688	-28.8125	-4.4375	-24.3438	-54.3125	-52.5938	-49.9375
		0.26	2.06	-48.0938	-51.6562	-50.7188	-6.96875	-48.75	4.3125	-16.6875	-53.1875	-0.03125	-52.0625	-35.0312	4.375	-30.8125	-54.4688	-52.7812	-49.75
		0.26	2.08	-48.1562	-51.75	-50.6875	-14.2812	-48.6562	-1.40625	-7.40625	-53.1562	-7.625	-52.2812	-40.4062	10.5	-36.6562	-54.5938	-52.8438	-49.875
		0.26	2.1	-48.1562	-51.875	-50.7812	-21.4688	-48.6562	-8.03125	0.875	-53.1875	-15.3125	-52.3125	-44.75	13.5312	-41.6562	-54.7188	-52.875	-49.875
		0.26	2.12	-48.1562	-51.875	-50.8125	-28.0938	-48.5625	-15.0938	6.90625	-53.1562	-22.8438	-52.4062	-48.5312	13.25	-45.875	-54.9375	-53	-49.7812
		0.26	2.14	-48.2188	-51.9062	-50.875	-33.9688	-48.625	-22	10.0938	-53.1875	-29.8125	-52.5625	-51.4375	10	-49.4375	-55	-52.9688	-50.0625
		0.26	2.16	-48.3438	-52.0625	-51	-39.1562	-48.6562	-28.4688	10.375	-53.1875	-35.9688	-52.5938	-53.7812	4.5625	-52.3438	-55.0312	-53.1562	-50
		0.26	2.18	-48.4062	-52.0312	-51.0312	-43.5	-48.625	-34.25	7.8125	-53.1875	-41.1562	-52.7188	-55.7188	-2.15625	-54.7188	-55.125	-53.2188	-50.0312
		0.26	2.2	-48.5	-52.1875	-51.0312	-47.1562	-48.6562	-39.2188	3.3125	-53.25	-45.5	-52.7188	-57.2812	-9.625	-56.5938	-55.3125	-53.3125	-50.125
		0.26	2.22	-48.625	-52.3438	-51.1562	-50.3125	-48.7188	-43.5	-2.5	-53.25	-49.1562	-52.9375	-58.4375	-17.375	-58.25	-55.375	-53.5	-50.2812
		0.26	2.24	-48.625	-52.4062	-51.2188	-52.7188	-48.6562	-47.125	-9.28125	-53.1875	-52.0625	-52.9062	-59.3125	-24.7812	-59.375	-55.625	-53.5312	-50.3125
		0.26	2.26	-48.6875	-52.4375	-51.4375	-54.5938	-48.8438	-50.0625	-16.3438	-53.1875	-54.3125	-53.0938	-60.0312	-31.5	-60.2812	-55.625	-53.625	-50.5
		0.26	2.28	-48.7812	-52.5625	-51.4375	-56.2188	-48.8438	-52.5	-23.1875	-53.2188	-56.3438	-53.1875	-60.625	-37.2812	-61.1562	-55.6875	-53.75	-50.6562
		0.26	2.3	-49.0312	-52.6875	-51.5938	-57.4375	-49.0312	-54.5312	-29.4688	-53.2188	-57.7812	-53.375	-60.875	-42.3438	-61.7188	-55.8438	-53.8125	-50.7188
		0.26	2.32	-49	-52.7188	-51.625	-58.375	-49.0625	-56.0312	-35.0938	-53.1875	-58.9375	-53.375	-61.2188	-46.5	-62.1562	-55.9688	-53.9375	-50.9062
		0.26	2.34	-49.25	-52.875	-51.8125	-59.1875	-49.1562	-57.4062	-39.9375	-53.2812	-59.7812	-53.4688	-61.4688	-49.8438	-62.5625	-56.0312	-53.9688	-51.1875
		0.26	2.36	-49.25	-52.8438	-51.875	-59.7812	-49.3125	-58.4062	-44.25	-53.3125	-60.5312	-53.6562	-61.5625	-52.6562	-62.9062	-56.1562	-54.2188	-51.1875
		0.26	2.38	-49.3125	-52.9688	-51.9688	-60.1875	-49.5	-59.125	-47.5625	-53.375	-61	-53.75	-61.7188	-54.9062	-63	-56.3438	-54.3125	-51.4062
		0.26	2.4	-49.5312	-52.9375	-52.0312	-60.6875	-49.625	-59.7812	-50.5625	-53.375	-61.4688	-53.7812	-61.8438	-56.625	-63.125	-56.375	-54.4375	-51.5
		0.26	2.42	-49.5312	-53	-52.1875	-60.75	-49.7812	-60.375	-52.9375	-53.4375	-61.75	-53.875	-61.8125	-58	-63.2812	-56.5	-54.5312	-51.625
		0.26	2.44	-49.6562	-52.9375	-52.3125	-60.9688	-49.8438	-60.625	-54.75	-53.5312	-61.9688	-54.0625	-61.8125	-59.1562	-63.3125	-56.625	-54.625	-51.7812
		0.26	2.46	-49.8125	-53	-52.4375	-61.125	-49.9375	-61.0312	-56.4062	-53.625	-62.125	-54.125	-61.9062	-60	-63.3438	-56.6562	-54.8125	-52.0938
		0.26	2.48	-49.8438	-53.0312	-52.5	-61.1562	-50.2188	-61.1875	-57.5312	-53.625	-62.2812	-54.25	-61.875	-60.6875	-63.4375	-56.75	-54.9062	-52.1875
		0.26	2.5	-50	-52.9062	-52.5	-61.0938	-50.2812	-61.3438	-58.5	-53.7188	-62.2812	-54.5	-61.7812	-61.1562	-63.375	-56.8125	-55.0938	-52.3438
		0.26	2.52	-50.0938	-53	-52.5938	-61.125	-50.375	-61.4688	-59.375	-53.8125	-62.3125	-54.5625	-61.8438	-61.5	-63.3438	-56.9688	-55.125	-52.6562
		0.26	2.54	-50.1562	-53.0312	-52.7188	-61.0625	-50.5625	-61.5312	-59.875	-53.9688	-62.375	-54.5312	-61.8125	-61.7812	-63.3438	-57.0312	-55.2188	-52.8125
		0.26	2.56	-50.1562	-53.0312	-52.6562	-61	-50.7188	-61.5	-60.4688	-54.0625	-62.3125	-54.7188	-61.75	-62.0312	-63.375	-57.1562	-55.3125	-52.9062
		0.26	2.58	-50.4062	-53	-52.7188	-61.0312	-50.875	-61.6562	-60.75	-54.1562	-62.3438	-54.8125	-61.75	-62.25	-63.2812	-57.1562	-55.4375	-53.0625
		0.26	2.6	-50.4688	-53.0938	-52.6562	-60.9062	-51	-61.8125	-61	-54.1562	-62.3438	-54.875	-61.75	-62.3125	-63.2812	-57.3125	-55.5312	-53.25
		0.26	2.62	-50.4688	-53.0625	-52.625	-60.8125	-51.125	-61.6562	-61.3125	-54.2812	-62.375	-55	-61.75	-62.3125	-63.2812	-57.4375	-55.6562	-53.3125
		0.26	2.64	-50.625	-53.1875	-52.5625	-60.8438	-51.2812	-61.6875	-61.4062	-54.375	-62.25	-55.1562	-61.7188	-62.4062	-63.2188	-57.4688	-55.8438	-53.5625
		0.26	2.66	-50.7188	-53.25	-52.5625	-60.6875	-51.3438	-61.625	-61.5	-54.5	-62.4062	-55.3438	-61.875	-62.4062	-63.25	-57.6562	-55.9375	-53.6562
		0.26	2.68	-50.7188	-53.3125	-52.5312	-60.6562	-51.4688	-61.6562	-61.625	-54.5	-62.3438	-55.3125	-61.9062	-62.3438	-63.3438	-57.7188	-56.0312	-53.875
		0.26	2.7	-50.8125	-53.2812	-52.5	-60.6875	-51.6562	-61.6562	-61.6562	-54.625	-62.3125	-55.375	-61.8438	-62.4688	-63.2812	-57.7812	-56.1562	-53.9688
		0.26	2.72	-50.8438	-53.4062	-52.4375	-60.5938	-51.6562	-61.6562	-61.6562	-54.6875	-62.3125	-55.5312	-61.8125	-62.4062	-63.25	-57.8125	-56.2188	-54.0625
		0.26	2.74	-50.9375	-53.5	-52.4375	-60.5	-51.7812	-61.5938	-61.6562	-54.75	-62.3125	-55.5312	-61.8125	-62.375	-63.3125	-57.875	-56.2812	-54.25
		0.26	2.76	-50.9062	-53.5312	-52.4062	-60.5312	-51.9688	-61.625	-61.625	-54.8438	-62.2188	-55.6562	-61.9062	-62.2812	-63.3438	-57.8438	-56.5	-54.375
		0.26	2.78	-51.0625	-53.625	-52.25	-60.5312	-52.0625	-61.5625	-61.6562	-54.9688	-62.2812	-55.7812	-61.9688	-62.3438	-63.3438	-57.9688	-56.5	-54.4688
		0.26	2.8	-50.9688	-53.6875	-52.2188	-60.4688	-52.1875	-61.5625	-61.625	-55.0312	-62.375	-55.8438	-62.0312	-62.2812	-63.375	-58.125	-56.6562	-54.625
		0.26	2.82	-51.125	-53.7188	-52.1562	-60.4062	-52.2812	-61.5938	-61.5312	-55.125	-62.3438	-55.9062	-62	-62.25	-63.4062	-58.1875	-56.6875	-54.7812
		0.26	2.84	-51.1562	-53.8438	-52.125	-60.375	-52.375	-61.5	-61.5	-55.2812	-62.375	-56.0312	-62	-62.3125	-63.3438	-58.25	-56.7188	-54.9688
		0.26	2.86	-51.125	-54.0312	-52.125	-60.2812	-52.5312	-61.5	-61.5	-55.2812	-62.4375	-56.1875	-62.0312	-62.3438	-63.4062	-58.3438	-56.9062	-55
		0.26	2.88	-51.3125	-54.0312	-52.1562	-60.4062	-52.6562	-61.5938	-61.4688	-55.375	-62.5	-56.1875	-62	-62.2812	-63.375	-58.5	-57	-55.125
		0.26	2.9	-51.375	-54.0938	-52.1875	-60.2812	-52.7812	-61.625	-61.5312	-55.5	-62.5	-56.3438	-62	-62.1875	-63.4688	-58.5312	-57.0312	-55.3438
		0.26	2.92	-51.3438	-54.1875	-52.0938	-60.25	-52.9688	-61.625	-61.4062	-55.4688	-62.5938	-56.4375	-62.125	-62.2812	-63.4375	-58.6562	-57.1562	-55.4375
		0.26	2.94	-51.4688	-54.1562	-52.0938	-60.25	-53.0625	-61.5938	-61.4062	-55.5312	-62.5938	-56.5	-62.2812	-62.1875	-63.5312	-58.6562	-57.25	-55.5
		0.26	2.96	-51.5	-54.1875	-52.25	-60.1875	-53.0312	-61.6562	-61.4062	-55.5625	-62.5312	-56.5	-62.25	-62.0938	-63.5312	-58.6562	-57.2188	-55.6875
		0.26	2.98	-51.5312	-54.4062	-52.1562	-60.25	-53.2188	-61.8125	-61.3438	-55.625	-62.625	-56.6562	-62.3438	-62.1875	-63.6562	-58.8125	-57.375	-55.75
		0.26	3	-51.6875	-54.4688	-52.1562	-60.2812	-53.2812	-61.7812	-61.4062	-55.7188	-62.7188	-56.6875	-62.4375	-62.1562	-63.6875	-58.8438	-57.4375	-55.8438
		0.26	3.02	-51.7188	-54.375	-52.1875	-60.1562	-53.375	-61.8125	-61.4062	-55.8125	-62.6562	-56.7812	-62.4688	-62.1562	-63.6875	-58.8125	-57.5	-56.0312
		0.26	3.04	-51.7812	-54.5625	-52.25	-60.25	-53.4688	-61.9062	-61.3438	-55.7812	-62.6875	-56.8125	-62.5312	-62.1875	-63.6875	-58.9062	-57.6562	-56.125
		0.26	3.06	-51.875	-54.5938	-52.3438	-60.3125	-53.5312	-61.9375	-61.3438	-55.9375	-62.8125	-56.9688	-62.5625	-62.3125	-63.8125	-59	-57.625	-56.2812
		0.26	3.08	-51.9688	-54.625	-52.375	-60.2188	-53.5938	-61.9375	-61.375	-55.9688	-62.8438	-57.0312	-62.625	-62.3438	-63.875	-59	-57.7188	-56.3438
		0.26	3.1	-51.9688	-54.7188	-52.5	-60.2812	-53.8438	-62.0625	-61.4375	-56.0625	-62.75	-57	-62.6562	-62.4375	-63.9688	-59.0312	-57.75	-56.5
		0.26	3.12	-52.0625	-54.8125	-52.625	-60.3125	-53.8125	-62.0312	-61.4375	-56.0938	-62.9688	-57.1562	-62.75	-62.4062	-64.0312	-59.1562	-57.75	-56.5
		0.26	3.14	-52.2188	-54.8125	-52.5	-60.3438	-53.9375	-62.0312	-61.4688	-56.1562	-63.0625	-57.1875	-62.8438	-62.4688	-64.0938	-59.1875	-57.8438	-56.625
		0.26	3.16	-52.2188	-54.8125	-52.5625	-60.375	-54.0938	-62.1875	-61.4688	-56.25	-62.9375	-57.2188	-62.7812	-62.4375	-64.0938	-59.25	-57.9688	-56.9062
		0.26	3.18	-52.3438	-54.9688	-52.5938	-60.4375	-54.0312	-62.2188	-61.5625	-56.3125	-63.0312	-57.3438	-62.8438	-62.5	-64.0938	-59.3438	-58.0312	-56.8438
		0.26	3.2	-52.4375	-55	-52.6875	-60.3438	-54.1562	-62.25	-61.5625	-56.3438	-63.0938	-57.3438	-62.9062	-62.5312	-64.1875	-59.3438	-58	-56.9062
		0.26	3.22	-52.4688	-55.0312	-52.7812	-60.4375	-54.25	-62.25	-61.5625	-56.4062	-63.1875	-57.375	-62.8438	-62.625	-64.2812	-59.3438	-58.2188	-57.0625
		0.26	3.24	-52.5	-55.0938	-52.7812	-60.5	-54.3438	-62.375	-61.6562	-56.4688	-63.1562	-57.5	-62.9375	-62.7188	-64.25	-59.5	-58.25	-57.0938
		0.26	3.26	-52.7188	-55.1562	-52.875	-60.4688	-54.4375	-62.4688	-61.5625	-56.5	-63.3125	-57.5938	-63	-62.7812	-64.3125	-59.5625	-58.2812	-57.125
		0.26	3.28	-52.6875	-55.2188	-52.9688	-60.5	-54.5	-62.5	-61.5938	-56.5	-63.3125	-57.5312	-63.0312	-62.875	-64.4375	-59.5312	-58.4062	-57.3125
		0.26	3.3	-52.6875	-55.375	-53.125	-60.5312	-54.5625	-62.5312	-61.7812	-56.5938	-63.4375	-57.5	-63.0625	-62.8438	-64.4375	-59.625	-58.4375	-57.4062
		0.26	3.32	-52.8125	-55.4062	-53.0938	-60.6562	-54.6875	-62.5	-61.7188	-56.6562	-63.5312	-57.625	-63.1562	-62.875	-64.4688	-59.75	-58.4688	-57.4375
		0.26	3.34	-52.9375	-55.4062	-53.2188	-60.8125	-54.7188	-62.5938	-61.7812	-56.6875	-63.4688	-57.625	-63.2188	-62.9375	-64.5938	-59.7188	-58.5938	-57.5312
		0.26	3.36	-52.9688	-55.5	-53.1562	-60.7188	-54.8438	-62.6875	-61.875	-56.625	-63.4688	-57.75	-63.1875	-62.9375	-64.6562	-59.7812	-58.5312	-57.6562
		0.26	3.38	-53.0312	-55.5312	-53.3438	-60.7812	-54.8438	-62.6562	-61.875	-56.6875	-63.5312	-57.8438	-63.25	-63	-64.5	-59.7812	-58.625	-57.6562
		0.26	3.4	-53.1875	-55.5938	-53.4062	-60.9062	-54.9375	-62.8438	-61.9688	-56.7812	-63.5938	-57.8125	-63.4062	-63	-64.6875	-59.8125	-58.6562	-57.6562
		0.26	3.42	-53.2188	-55.5625	-53.4062	-60.9375	-54.9688	-62.7812	-62.0312	-56.8438	-63.625	-57.9062	-63.3438	-63.1562	-64.7812	-59.875	-58.7188	-57.8438
		0.26	3.44	-53.1875	-55.7188	-53.5312	-60.9688	-55.0938	-62.8438	-62	-56.9062	-63.7188	-57.9062	-63.3125	-63.1562	-64.7188	-59.9375	-58.7812	-57.875
		0.26	3.46	-53.4375	-55.75	-53.5625	-61.0625	-55.0625	-62.875	-62.0938	-56.9688	-63.8438	-57.9375	-63.5	-63.1875	-64.7812	-60.0312	-58.8125	-57.8438
		0.26	3.48	-53.4688	-55.7812	-53.6875	-61.0938	-55.125	-62.9688	-62.1562	-57.0312	-63.875	-57.9375	-63.5	-63.3438	-64.8438	-60	-58.9375	-58.0625
		0.26	3.5	-53.4375	-55.875	-53.8438	-61	-55.2188	-62.9375	-62.1562	-57.0312	-63.8438	-58.0938	-63.5	-63.3438	-64.9375	-60.0625	-58.9375	-58.0625
		0.26	3.52	-53.6875	-55.9375	-53.5938	-61.1562	-55.25	-63	-62.2188	-57.0625	-64.0312	-58.125	-63.6562	-63.375	-64.8438	-60.0938	-59.0312	-58.125
		0.26	3.54	-53.6875	-55.9375	-53.75	-61.1875	-55.3438	-63.125	-62.3125	-57.125	-64.0312	-58.125	-63.6562	-63.4688	-64.9688	-60.125	-59.0625	-58.25
		0.26	3.56	-53.6875	-55.9688	-53.7812	-61.25	-55.375	-63.125	-62.4062	-57.1875	-64.0312	-58.125	-63.75	-63.5625	-65.0938	-60.0938	-59.0938	-58.2812
		0.26	3.58	-53.75	-56.0625	-53.9062	-61.375	-55.375	-63.25	-62.4375	-57.1875	-64.0625	-58.2188	-63.8125	-63.5	-65.0625	-60.25	-59.1562	-58.375
		0.26	3.6	-53.8438	-56.0938	-53.9375	-61.4375	-55.5625	-63.3438	-62.4688	-57.1875	-64.1875	-58.2188	-64.0312	-63.625	-65.0625	-60.2188	-59.0938	-58.4688
		0.26	3.62	-53.8125	-56.125	-54	-61.4375	-55.5312	-63.2812	-62.5938	-57.3438	-64.2812	-58.3438	-63.875	-63.6875	-65.25	-60.3125	-59.1562	-58.4688
		0.26	3.64	-53.9375	-56.1562	-54.0938	-61.5	-55.5938	-63.3438	-62.6562	-57.3125	-64.2812	-58.2188	-63.9062	-63.7188	-65.25	-60.4062	-59.25	-58.5
		0.26	3.66	-54	-56.1562	-54.1875	-61.5312	-55.7812	-63.4375	-62.5938	-57.4062	-64.4062	-58.4062	-64.0312	-63.7812	-65.2812	-60.2812	-59.2188	-58.5625
		0.26	3.68	-54.0312	-56.125	-54.1875	-61.5312	-55.6875	-63.4375	-62.7188	-57.4375	-64.4062	-58.4688	-64.0938	-63.75	-65.375	-60.375	-59.25	-58.6562
		0.26	3.7	-54.1562	-56.375	-54.25	-61.6562	-55.7812	-63.4375	-62.8125	-57.4062	-64.5312	-58.4062	-64.0938	-63.7812	-65.4375	-60.4688	-59.4375	-58.5938
		0.26	3.72	-54.1875	-56.2812	-54.375	-61.7188	-55.875	-63.6562	-62.75	-57.5	-64.5938	-58.5	-64.0938	-63.8125	-65.3125	-60.4375	-59.375	-58.6562
		0.26	3.74	-54.3125	-56.3125	-54.5	-61.6562	-55.9688	-63.5625	-62.9062	-57.5	-64.5625	-58.5312	-64.1562	-63.8438	-65.375	-60.4375	-59.3438	-58.8125
		0.26	3.76	-54.3125	-56.4688	-54.4688	-61.8438	-56	-63.7188	-62.875	-57.5625	-64.5312	-58.5	-64.125	-63.9062	-65.5	-60.5	-59.4688	-58.875
		0.26	3.78	-54.4062	-56.4062	-54.5312	-61.8125	-56.0625	-63.75	-62.9062	-57.5938	-64.6562	-58.5938	-64.25	-64.0312	-65.4688	-60.5625	-59.4062	-58.8438
		0.26	3.8	-54.5	-56.4688	-54.5312	-61.8438	-56.0938	-63.625	-63.0312	-57.7188	-64.6562	-58.5938	-64.375	-64.0625	-65.5312	-60.4688	-59.4688	-58.9062
		0.26	3.82	-54.4375	-56.4688	-54.5938	-61.7812	-56.1875	-63.8438	-63.0625	-57.6562	-64.6875	-58.5625	-64.375	-64.2188	-65.5938	-60.5	-59.5312	-58.9688
		0.26	3.84	-54.5625	-56.5938	-54.75	-62.0312	-56.2812	-64.0312	-63.0938	-57.6562	-64.8125	-58.6562	-64.4062	-64.2188	-65.6562	-60.6562	-59.5	-58.875
		0.26	3.86	-54.5938	-56.5625	-54.7188	-62	-56.2188	-63.9062	-63.1875	-57.75	-64.9062	-58.75	-64.5312	-64.2188	-65.625	-60.5938	-59.5938	-59.0312
		0.26	3.88	-54.6562	-56.5312	-54.7812	-62.0938	-56.3125	-64.0312	-63.2188	-57.75	-64.9062	-58.7188	-64.5625	-64.4062	-65.75	-60.6562	-59.6562	-59.1875
		0.26	3.9	-54.6562	-56.6875	-54.8438	-62.25	-56.4375	-64.1562	-63.25	-57.9062	-64.9062	-58.875	-64.5312	-64.4062	-65.8125	-60.7188	-59.625	-59.2188
		0.26	3.92	-54.7812	-56.625	-54.9062	-62.1875	-56.4062	-64.0312	-63.3125	-57.7812	-64.9688	-58.8125	-64.6562	-64.375	-65.7812	-60.6562	-59.625	-59.2188
		0.26	3.94	-54.8438	-56.6875	-54.9062	-62.25	-56.5312	-64.0938	-63.4062	-57.9062	-64.9375	-58.9062	-64.7188	-64.5	-65.7812	-60.7188	-59.8125	-59.25
		0.26	3.96	-54.8438	-56.6875	-55	-62.3438	-56.4688	-64.125	-63.375	-57.9375	-64.9688	-58.9375	-64.7188	-64.5312	-65.8125	-60.7812	-59.75	-59.2188
		0.26	3.98	-55	-56.8125	-55.0312	-62.25	-56.5312	-64.25	-63.5	-57.8438	-65.0312	-58.9375	-64.6875	-64.5	-65.9688	-60.7812	-59.6875	-59.25
		0.26	4	-55.0625	-56.75	-55.125	-62.375	-56.6875	-64.1562	-63.5	-58.0625	-65.1562	-59	-64.7812	-64.5938	-66	-60.8125	-59.875	-59.3125
		0.26	4.02	-55.0312	-56.8438	-55.1562	-62.4375	-56.6562	-64.3125	-63.5938	-58.0312	-65.1562	-59.0625	-64.8125	-64.5938	-65.9375	-60.9062	-59.8125	-59.375
		0.26	4.04	-55.125	-56.8438	-55.2188	-62.5	-56.7188	-64.3438	-63.625	-58.0938	-65.1875	-59	-64.8438	-64.5625	-66.0312	-60.9062	-59.8125	-59.375
		0.26	4.06	-55.1562	-56.8438	-55.3438	-62.5	-56.7812	-64.2812	-63.6562	-58.0938	-65.3125	-59.0625	-64.9062	-64.5938	-66.125	-60.9062	-60	-59.4375
		0.26	4.08	-55.1562	-56.8438	-55.25	-62.5	-56.75	-64.4375	-63.75	-58.0938	-65.3438	-59.125	-64.9688	-64.6562	-66.1562	-60.9062	-59.9375	-59.5
		0.26	4.1	-55.2812	-56.9375	-55.375	-62.5625	-56.7812	-64.4062	-63.8125	-58.0938	-65.3125	-59.0625	-64.9375	-64.625	-66.1562	-61.0312	-60.0312	-59.5625
		0.26	4.12	-55.2812	-56.9062	-55.4688	-62.6562	-56.875	-64.4375	-63.8438	-58.125	-65.375	-59.125	-64.9688	-64.7812	-66.2188	-61	-60.0312	-59.5312
		0.26	4.14	-55.25	-56.9688	-55.4375	-62.6875	-56.875	-64.5312	-63.9062	-58.0625	-65.4062	-59.0938	-65.0938	-64.8125	-66.25	-60.9375	-60.0312	-59.6562
		0.26	4.16	-55.3125	-57.0312	-55.5	-62.7188	-56.9062	-64.5938	-63.9375	-58.1562	-65.4375	-59.1562	-65	-64.8438	-66.25	-61.0625	-60	-59.5625
		0.26	4.18	-55.4375	-57	-55.5625	-62.7812	-57	-64.5938	-63.9062	-58.1875	-65.4688	-59.1875	-65.1562	-64.9062	-66.375	-61.0938	-60.125	-59.625
		0.26	4.2	-55.4062	-57	-55.5938	-62.9062	-56.9688	-64.6562	-64.0312	-58.1562	-65.5625	-59.2188	-65.25	-64.9062	-66.3438	-61.0312	-60.2188	-59.7188
		0.26	4.22	-55.375	-57	-55.5938	-62.9062	-56.9375	-64.625	-64.0312	-58.2812	-65.5938	-59.25	-65.1875	-64.9375	-66.4062	-61.0312	-60.0938	-59.75
		0.26	4.24	-55.5	-57.125	-55.6875	-62.9688	-57.0938	-64.5938	-64.0625	-58.25	-65.4688	-59.3125	-65.2812	-64.9375	-66.4688	-61.1875	-60.1875	-59.6875
		0.26	4.26	-55.5312	-57.0938	-55.6875	-62.9688	-57.0312	-64.6875	-64.1875	-58.25	-65.5938	-59.3125	-65.3438	-64.9688	-66.5	-61.1562	-60.1562	-59.8125
		0.26	4.28	-55.5312	-57.1562	-55.7188	-62.9375	-57.125	-64.75	-64.1875	-58.4062	-65.625	-59.3125	-65.375	-65.0312	-66.4688	-61.0938	-60.1875	-59.8438
		0.26	4.3	-55.625	-57.2188	-55.75	-63.0312	-57.1562	-64.75	-64.2812	-58.4062	-65.6562	-59.3438	-65.4375	-65.125	-66.5	-61.1875	-60.25	-59.9688
		0.26	4.32	-55.625	-57.1875	-55.75	-63.125	-57.1562	-64.8125	-64.3125	-58.3438	-65.7188	-59.4062	-65.5	-65.1562	-66.5312	-61.1875	-60.2188	-60
		0.26	4.34	-55.5625	-57.2188	-55.8438	-63.1562	-57.2188	-64.875	-64.3438	-58.4375	-65.8125	-59.375	-65.5	-65.1875	-66.5625	-61.125	-60.2188	-60.0312
		0.26	4.36	-55.6562	-57.3125	-55.9688	-63.0625	-57.1562	-64.9062	-64.3438	-58.4375	-65.75	-59.4375	-65.5	-65.25	-66.6562	-61.1562	-60.25	-60.0312
		0.26	4.38	-55.7812	-57.25	-55.9062	-63.2188	-57.3125	-64.9062	-64.5	-58.375	-65.75	-59.4375	-65.5312	-65.25	-66.6562	-61.25	-60.2812	-60
		0.26	4.4	-55.6875	-57.25	-56.0625	-63.2812	-57.25	-65.0312	-64.5	-58.5	-65.8438	-59.5	-65.6562	-65.25	-66.75	-61.25	-60.3125	-60.125
		0.26	4.42	-55.7812	-57.3125	-56.0312	-63.3125	-57.3125	-65.0625	-64.5	-58.5	-65.9375	-59.5	-65.6875	-65.375	-66.6875	-61.1562	-60.375	-60.2188
		0.26	4.44	-55.8438	-57.375	-56.0938	-63.375	-57.2812	-65.0312	-64.5938	-58.5	-66.0312	-59.5312	-65.6562	-65.375	-66.7812	-61.3438	-60.375	-60.125
		0.26	4.46	-55.9375	-57.3125	-56.125	-63.3438	-57.4062	-65.125	-64.5938	-58.5312	-65.9375	-59.5312	-65.6875	-65.4062	-66.8438	-61.2188	-60.3125	-60.2188
		0.26	4.48	-55.9062	-57.375	-56.2188	-63.375	-57.4375	-65.0312	-64.5312	-58.5312	-66.125	-59.5625	-65.7812	-65.4688	-66.9062	-61.2812	-60.375	-60.3125
		0.26	4.5	-56	-57.4375	-56.125	-63.375	-57.4375	-65.0938	-64.6875	-58.5312	-66.0312	-59.5938	-65.7188	-65.4062	-66.9375	-61.3438	-60.4375	-60.25
		0.26	4.52	-56	-57.4062	-56.2812	-63.4375	-57.4688	-65.1875	-64.7812	-58.5	-66.1562	-59.5625	-65.8438	-65.5312	-66.9375	-61.3438	-60.5	-60.2188
		0.26	4.54	-56.0312	-57.4062	-56.3438	-63.4062	-57.5312	-65.1875	-64.7812	-58.5938	-66.1875	-59.6562	-65.9375	-65.5938	-66.9688	-61.3438	-60.4688	-60.3438
		0.26	4.56	-56.0625	-57.4375	-56.25	-63.4375	-57.5	-65.1562	-64.8438	-58.6562	-66.2812	-59.6875	-66	-65.5938	-66.9688	-61.4375	-60.5	-60.4062
		0.26	4.58	-56.0938	-57.3438	-56.375	-63.5625	-57.5312	-65.3125	-64.8125	-58.625	-66.2812	-59.5938	-65.9375	-65.6875	-66.9062	-61.3438	-60.5	-60.375
		0.26	4.6	-56.125	-57.1875	-56.5	-63.5	-57.5938	-65.25	-64.8125	-58.5312	-66.3438	-59.625	-66.0625	-65.6875	-67.0625	-61.4062	-60.625	-60.4062
		0.26	4.62	-56.1875	-57.25	-56.4375	-63.5312	-57.5938	-65.2812	-64.9062	-58.75	-66.375	-59.75	-65.9375	-65.6875	-67.0312	-61.3125	-60.5938	-60.4688
		0.26	4.64	-56.2812	-57.0938	-56.5	-63.5938	-57.6875	-65.25	-64.9375	-58.625	-66.3438	-59.6562	-65.9688	-65.8125	-67.0625	-61.5	-60.5625	-60.4688
		0.26	4.66	-56.0938	-57	-56.5312	-63.6562	-57.6875	-65.375	-65	-58.5625	-66.375	-59.8125	-66.0625	-65.7188	-67	-61.4375	-60.625	-60.5
		0.26	4.68	-56.1562	-56.9688	-56.4688	-63.6875	-57.5938	-65.3438	-65.0625	-58.6875	-66.4062	-59.8125	-66.1562	-65.7812	-67.0938	-61.4375	-60.7812	-60.5
		0.26	4.7	-56.2812	-57.0312	-56.5625	-63.7188	-57.7812	-65.4688	-65.0312	-58.7188	-66.5	-59.75	-66.1562	-65.8438	-67.0312	-61.5	-60.6875	-60.5938
		0.26	4.72	-56.3125	-56.875	-56.5312	-63.8438	-57.7812	-65.5	-65.0312	-58.7188	-66.4375	-59.9375	-66.125	-65.7812	-67.1562	-61.5312	-60.6875	-60.5
		0.26	4.74	-56.25	-56.8438	-56.5312	-63.7812	-57.7812	-65.4375	-65.1562	-58.6875	-66.5	-59.9062	-66.1562	-65.9062	-67.2812	-61.5	-60.7188	-60.625
		0.26	4.76	-56.3125	-56.8125	-56.5938	-63.8438	-57.8125	-65.5	-65.1562	-58.6875	-66.5312	-59.9062	-66.2188	-65.9375	-67.2812	-61.5625	-60.75	-60.6562
		0.26	4.78	-56.375	-56.8438	-56.6875	-63.9062	-57.8438	-65.5938	-65.1562	-58.75	-66.5312	-60	-66.1875	-65.9062	-67.1875	-61.5938	-60.7812	-60.625
		0.26	4.8	-56.375	-56.75	-56.6875	-63.875	-57.8438	-65.4062	-65.375	-58.7812	-66.5625	-59.875	-66.2188	-66.0312	-67.1875	-61.5625	-60.8125	-60.6562
		0.26	4.82	-56.4375	-56.7812	-56.7188	-63.9688	-57.875	-65.5	-65.3438	-58.75	-66.6562	-59.875	-66.25	-65.9375	-67.3125	-61.5312	-60.8125	-60.6562
		0.26	4.84	-56.4688	-56.8438	-56.7188	-63.9062	-57.9375	-65.6562	-65.1562	-58.9062	-66.6875	-60	-66.3125	-66.0625	-67.25	-61.6562	-60.75	-60.6562
		0.26	4.86	-56.4688	-56.7812	-56.7812	-64.0312	-57.9688	-65.5938	-65.375	-58.8438	-66.6562	-59.875	-66.2812	-66.125	-67.2812	-61.625	-60.8438	-60.7188
		0.26	4.88	-56.5	-56.8438	-56.875	-63.9062	-58.0938	-65.5938	-65.375	-58.7812	-66.6562	-59.9062	-66.4062	-66.1562	-67.4062	-61.6875	-60.8438	-60.7188
		0.26	4.9	-56.5312	-56.875	-56.7812	-64.0938	-58.0625	-65.6875	-65.4062	-58.9375	-66.6562	-59.9375	-66.4688	-66.1875	-67.375	-61.6562	-60.8438	-60.8438
		0.26	4.92	-56.5625	-56.8125	-56.875	-64.0312	-57.8438	-65.7188	-65.4688	-58.9375	-66.75	-59.9375	-66.375	-66.25	-67.375	-61.6875	-60.875	-60.8125
		0.26	4.94	-56.5938	-56.7812	-56.9062	-64.0312	-58.0625	-65.5625	-65.4688	-58.9375	-66.6875	-60	-66.4375	-66.1875	-67.5312	-61.6875	-60.9062	-60.8125
		0.26	4.96	-56.7188	-56.9062	-56.875	-64.0625	-57.9688	-65.6875	-65.5	-59	-66.8125	-60	-66.4688	-66.3438	-67.5312	-61.6562	-60.8125	-60.9062
		0.26	4.98	-56.6562	-56.9375	-56.8438	-64.125	-58	-65.875	-65.4688	-58.8438	-66.9062	-59.9375	-66.5312	-66.3438	-67.4688	-61.6875	-60.9688	-60.9062
		0.36	0	-61.1562	-61.7188	-59.9375	-60.2188	-60.2188	-60.125	-61.2188	-61.3125	-61.4375	-61.6875	-62.4688	-62.5312	-62.625	-62.2812	-64.2188	-64.2188	-63.4062	-63.6562
		0.36	0.02	-61.2812	-61.875	-59.9062	-60.125	-60.2812	-60	-61.1562	-61.2812	-61.5	-61.6875	-62.4375	-62.4375	-62.5312	-62.2188	-64.375	-64.1875	-63.625	-63.5938
		0.36	0.04	-61.1875	-61.8125	-59.9062	-60.0625	-60.1875	-60.0312	-61.125	-61.3125	-61.5	-61.75	-62.4375	-62.4688	-62.5938	-62.25	-64.3438	-64.25	-63.5	-63.7188
		0.36	0.06	-61.1562	-61.8438	-60	-60.0938	-60.2188	-60.0625	-61.0625	-61.375	-61.4375	-61.6562	-62.4375	-62.5312	-62.5938	-62.25	-64.2812	-64.2188	-63.3125	-63.75
		0.36	0.08	-61.3438	-61.8438	-59.9688	-60.125	-60.25	-60.125	-61.0938	-61.3438	-61.5	-61.625	-62.375	-62.5	-62.5938	-62.1875	-64.2188	-64.25	-63.4688	-63.625
		0.36	0.1	-61.1875	-61.75	-59.875	-60.0312	-60.2188	-60.0938	-61.0625	-61.3125	-61.4062	-61.7188	-62.375	-62.4688	-62.5625	-62.2812	-64.3438	-64.1875	-63.4688	-63.5625
		0.36	0.12	-61.2188	-61.7812	-59.875	-60.1562	-60.2812	-60.125	-61.0625	-61.375	-61.5	-61.6562	-62.5	-62.4375	-62.5312	-62.3125	-64.2812	-64.2812	-63.4375	-63.6562
		0.36	0.14	-61.2188	-61.7812	-59.875	-60.125	-60.2812	-60.0312	-61.2188	-61.375	-61.4375	-61.625	-62.4375	-62.5	-62.5312	-62.375	-64.2812	-64.3438	-63.4062	-63.625
		0.36	0.16	-61.25	-61.7188	-59.9375	-60.0938	-60.1875	-60	-61.1562	-61.3438	-61.4375	-61.625	-62.4375	-62.4375	-62.625	-62.375	-64.2812	-64.25	-63.4062	-63.6875
		0.36	0.18	-61.2188	-61.75	-59.875	-60.0625	-60.1875	-60	-61.125	-61.3125	-61.4375	-61.6562	-62.4688	-62.4688	-62.625	-62.2812	-64.375	-64.3438	-63.4062	-63.7188
		0.36	0.2	-61.3125	-61.7812	-59.9375	-60.1562	-60.375	-60.0938	-61.1562	-61.3438	-61.4062	-61.6562	-62.4062	-62.4062	-62.5625	-62.4062	-64.25	-64.375	-63.4375	-63.5938
		0.36	0.22	-61.1562	-61.8125	-59.9375	-60.1875	-60.3438	-60	-61.1562	-61.2188	-61.4688	-61.6562	-62.4062	-62.5	-62.7188	-62.3438	-64.2812	-64.375	-63.4062	-63.6875
		0.36	0.24	-61.2188	-61.8438	-59.9375	-60.1562	-60.0938	-60.0625	-61.1562	-61.2188	-61.5	-61.75	-62.5	-62.5312	-62.6875	-62.3438	-64.3125	-64.3125	-63.3125	-63.6875
		0.36	0.26	-61.2812	-61.8438	-60	-60.1562	-60.2188	-60.0625	-61.1875	-61.2812	-61.5	-61.6875	-62.5	-62.4688	-62.5625	-62.4062	-64.2188	-64.3438	-63.4375	-63.6562
		0.36	0.28	-61.1562	-61.7812	-60.0312	-60.2188	-60.125	-60.1562	-61.2812	-61.4375	-61.4688	-61.6562	-62.5	-62.5312	-62.6562	-62.4062	-64.2188	-64.375	-63.4062	-63.7188
		0.36	0.3	-61.25	-61.8125	-59.9062	-60.1562	-60.1875	-60.0312	-61.25	-61.375	-61.5	-61.6562	-62.5	-62.5	-62.6875	-62.2812	-64.3438	-64.25	-63.3438	-63.75
		0.36	0.32	-61.3438	-61.8125	-59.9375	-60.2188	-60.1562	-60.0938	-61.2188	-61.3438	-61.3438	-61.6875	-62.5	-62.5	-62.625	-62.3438	-64.3125	-64.3438	-63.4688	-63.6875
		0.36	0.34	-61.25	-61.75	-60.0625	-60.25	-60.1562	-60.0625	-61.25	-61.3125	-61.3438	-61.625	-62.4688	-62.5312	-62.6562	-62.3438	-64.2812	-64.375	-63.4062	-63.7812
		0.36	0.36	-61.25	-61.8438	-59.9688	-60.1562	-60.2812	-60.0312	-61.1875	-61.25	-61.2812	-61.625	-62.5312	-62.5	-62.5938	-62.375	-64.4062	-64.2812	-63.3438	-63.7812
		0.36	0.38	-61.1562	-61.75	-59.75	-60.0312	-60.125	-59.8438	-61.0312	-61.1562	-61.1875	-61.4688	-62.4062	-62.3438	-62.5	-62.1562	-64.1875	-64.0938	-63.3125	-63.5
		0.36	0.4	-61.8125	-62.4688	-60.5625	-60.7812	-60.8438	-60.5938	-61.6562	-61.8438	-61.8125	-62.1875	-63.0625	-63.0938	-63.1562	-62.875	-64.8125	-64.875	-63.9062	-64.2812
		0.36	0.42	-65.7812	-66.4062	-64.5	-64.6562	-64.6875	-64.625	-65.4375	-65.5312	-65.625	-65.9688	-67.0312	-67.0938	-67.2188	-66.9062	-68.5312	-68.5	-67.5625	-67.875
		0.36	0.44	-68.5	-69.0312	-67	-67.2812	-67.4375	-67.25	-68.0625	-68.2188	-68.1875	-68.5	-69.9375	-69.9375	-70.125	-69.6875	-71.2188	-71.0938	-70.2812	-70.4688
		0.36	0.46	-68.3125	-69.0312	-67.125	-67.2812	-67.4062	-67.1562	-68.1875	-68.2188	-68.3125	-68.6562	-69.9688	-69.9688	-70.0312	-69.7188	-71.3125	-71.2812	-70.375	-70.7812
		0.36	0.48	-67.3438	-68.0625	-66.125	-66.4062	-66.4062	-66.375	-67.2812	-67.4062	-67.4062	-67.7188	-68.9062	-68.875	-69.125	-68.8125	-70.4062	-70.5	-69.4688	-69.9062
		0.36	0.5	-66.2812	-67	-64.9688	-65.2188	-65.25	-65.0938	-66.2188	-66.2812	-66.2188	-66.6562	-67.6562	-67.5938	-67.8438	-67.5938	-69.4062	-69.375	-68.4688	-68.8125
		0.36	0.52	-65.2188	-65.75	-63.9062	-64.2188	-64.25	-64.0938	-65.0938	-65.2812	-65.2812	-65.6562	-66.5625	-66.5938	-66.625	-66.375	-68.4062	-68.3125	-67.375	-67.7812
		0.36	0.54	-64.3438	-65	-63	-63.3125	-63.2812	-63.3125	-64.3438	-64.5	-64.375	-64.875	-65.6562	-65.6875	-65.75	-65.5	-67.5	-67.5	-66.5625	-66.9062
		0.36	0.56	-63.7188	-64.1875	-62.4688	-62.6562	-62.6562	-62.6562	-63.75	-63.8125	-63.75	-64.1562	-65	-64.9375	-65.0938	-64.875	-66.8125	-66.8125	-65.9688	-66.2812
		0.36	0.58	-63.2188	-63.7812	-61.9375	-62.125	-62.1562	-62.0312	-63.1875	-63.3125	-63.2812	-63.625	-64.4688	-64.4062	-64.5312	-64.25	-66.375	-66.2188	-65.4375	-65.7812
		0.36	0.6	-62.7188	-63.375	-61.5312	-61.7812	-61.75	-61.6562	-62.8125	-62.9062	-62.875	-63.25	-64.0312	-64.0625	-64.1875	-63.9062	-65.9375	-65.9375	-65	-65.3125
		0.36	0.62	-62.5312	-63.0938	-61.3438	-61.4688	-61.5	-61.4062	-62.5	-62.625	-62.5938	-62.9688	-63.8125	-63.8438	-63.9062	-63.6562	-65.5625	-65.6875	-64.6875	-64.9688
		0.36	0.64	-62.5	-63	-61	-61.1562	-61.25	-61.1875	-62.2812	-62.4375	-62.3438	-62.8125	-63.6562	-63.5625	-63.6562	-63.4688	-65.5312	-65.2812	-64.5312	-64.7812
		0.36	0.66	-62.1562	-62.75	-60.75	-61.0938	-61.125	-61	-62.0625	-62.3125	-62.0625	-62.625	-63.4688	-63.4375	-63.5	-63.2812	-65.1875	-65.2188	-64.3125	-64.5938
		0.36	0.68	-62.0938	-62.625	-60.75	-61	-61	-60.8438	-61.9375	-62.125	-61.9688	-62.375	-63.2812	-63.375	-63.375	-63.1875	-65.0938	-65.0938	-64.1562	-64.4062
		0.36	0.7	-62.0625	-62.5625	-60.5625	-60.9062	-60.9375	-60.8438	-61.8438	-62.0312	-61.875	-62.25	-63.1875	-63.2188	-63.2188	-63.0938	-65.0312	-64.875	-64.0625	-64.4688
		0.36	0.72	-61.9062	-62.5312	-60.5	-60.7812	-60.7188	-60.7188	-61.7188	-61.875	-61.7812	-62.1562	-63	-63.0938	-63.1875	-62.9375	-64.875	-64.8438	-64.0312	-64.3438
		0.36	0.74	-61.875	-62.4062	-60.5	-60.7812	-60.7812	-60.625	-61.5938	-61.8125	-61.7812	-62.25	-63.0312	-63	-63.0938	-62.9062	-64.7812	-64.875	-64.0312	-64.3125
		0.36	0.76	-61.7812	-62.25	-60.4062	-60.5938	-60.7188	-60.5	-61.625	-61.8125	-61.6562	-62.0625	-63.0312	-62.9375	-63	-62.9062	-64.7812	-64.6875	-63.9375	-64.2812
		0.36	0.78	-61.6562	-62.2812	-60.375	-60.6875	-60.5938	-60.5312	-61.5625	-61.7188	-61.5312	-62	-62.875	-62.9062	-63	-62.8438	-64.75	-64.7188	-63.7812	-64.125
		0.36	0.8	-61.75	-62.1875	-60.2812	-60.5625	-60.5312	-60.5312	-61.4375	-61.6875	-61.5312	-61.9688	-62.9062	-62.9375	-63	-62.6875	-64.625	-64.7188	-63.75	-64.1562
		0.36	0.82	-61.75	-62.2188	-60.3438	-60.5	-60.5625	-60.4375	-61.4062	-61.625	-61.4688	-62	-62.8125	-62.8125	-63	-62.7188	-64.6875	-64.6562	-63.7188	-64.0938
		0.36	0.84	-61.5312	-62.1562	-60.1875	-60.5625	-60.5	-60.5	-61.4062	-61.625	-61.4375	-61.8125	-62.7812	-62.8125	-62.9062	-62.6875	-64.5938	-64.5938	-63.5938	-64.0312
		0.36	0.86	-61.6562	-62.0938	-60.1875	-60.4688	-60.5	-60.4062	-61.3438	-61.5	-61.4688	-61.875	-62.8125	-62.8438	-62.9375	-62.5938	-64.5312	-64.5938	-63.6562	-64.0312
		0.36	0.88	-61.6562	-62.0625	-60.1875	-60.4062	-60.5	-60.2812	-61.3125	-61.5312	-61.4375	-61.9062	-62.7812	-62.8125	-62.8438	-62.6562	-64.5	-64.5	-63.6562	-64.0312
		0.36	0.9	-61.5938	-62.0625	-60.1562	-60.4062	-60.3438	-60.3125	-61.2812	-61.5	-61.375	-61.7812	-62.6875	-62.75	-62.8438	-62.625	-64.5312	-64.5	-63.5312	-63.9375
		0.36	0.92	-61.5938	-62	-60.25	-60.3438	-60.375	-60.25	-61.3125	-61.4688	-61.4062	-61.8438	-62.6875	-62.7188	-62.875	-62.5938	-64.5	-64.5625	-63.5312	-63.8438
		0.36	0.94	-61.5625	-62.0312	-60.125	-60.3125	-60.4375	-60.2188	-61.2812	-61.5312	-61.375	-61.8125	-62.6875	-62.6562	-62.8125	-62.5312	-64.5312	-64.5312	-63.5938	-64.0312
		0.36	0.96	-61.5	-61.9062	-60.125	-60.4062	-60.4062	-60.2812	-61.1875	-61.5625	-61.3438	-61.75	-62.7188	-62.7188	-62.875	-62.5938	-64.4688	-64.4688	-63.5312	-63.9062
		0.36	0.98	-61.5625	-61.9688	-60.0938	-60.375	-60.375	-60.25	-61.2812	-61.625	-61.375	-61.7812	-62.7188	-62.7188	-62.7812	-62.5938	-64.4375	-64.4688	-63.5	-63.9375
		0.36	1	-61.6562	-62.0625	-60.2188	-60.4688	-60.5	-60.3438	-61.375	-61.5312	-61.4688	-61.9375	-62.75	-62.7188	-62.75	-62.5938	-64.4688	-64.4688	-63.5	-63.9062
		0.36	1.02	-61.8125	-62.25	-60.25	-60.6875	-60.5312	-60.4062	-61.5	-61.6875	-61.5938	-61.9688	-62.6562	-62.6875	-62.8125	-62.625	-64.4375	-64.4062	-63.4688	-63.8438
		0.36	1.04	-62.0938	-62.4375	-60.4688	-60.8438	-60.75	-60.625	-61.6562	-62	-61.8438	-62.2188	-62.75	-62.625	-62.75	-62.5625	-64.4062	-64.5312	-63.5	-63.7812
		0.36	1.06	-62.2812	-62.6875	-60.6875	-61.0625	-61	-60.8438	-61.9375	-62.1562	-61.9375	-62.5	-62.6562	-62.625	-62.7812	-62.5625	-64.5312	-64.5312	-63.5938	-64.0312
		0.36	1.08	-62.4688	-62.8438	-60.8438	-61.25	-61.25	-60.9375	-62.0938	-62.4062	-62.2188	-62.6875	-62.7812	-62.8438	-62.8125	-62.6875	-64.6562	-64.5938	-63.6875	-64.0312
		0.36	1.1	-62.6562	-63.0312	-61.125	-61.5	-61.5	-61.3125	-62.375	-62.7188	-62.5625	-63.0312	-62.9375	-62.875	-62.9062	-62.7812	-64.875	-64.8125	-63.8438	-64.2188
		0.36	1.12	-63	-63.375	-61.4062	-61.7812	-61.75	-61.5625	-62.7812	-63.0312	-62.7812	-63.375	-63.0625	-63.0625	-63.0625	-62.8438	-65.0312	-64.9375	-64.0312	-64.4375
		0.36	1.14	-63.1562	-63.5938	-61.6562	-62.0938	-62.0938	-61.8125	-63.0625	-63.2812	-63.1562	-63.5625	-63.1562	-63.1875	-63.3125	-63.0312	-65.1875	-65.2188	-64.1875	-64.5938
		0.36	1.16	-63.5312	-63.875	-61.9688	-62.3438	-62.2188	-62.125	-63.3125	-63.5938	-63.5	-63.875	-63.3125	-63.3125	-63.4375	-63.3438	-65.4062	-65.5	-64.4375	-64.9375
		0.36	1.18	-63.8438	-64.125	-62.2188	-62.625	-62.5	-62.4062	-63.6562	-64.0312	-63.75	-64.2188	-63.5	-63.5	-63.7188	-63.5938	-65.5938	-65.6562	-64.7188	-65.1562
		0.36	1.2	-64.0312	-64.4375	-62.5312	-63	-62.8125	-62.5938	-63.9688	-64.1875	-63.9688	-64.375	-63.5938	-63.6875	-63.875	-63.75	-65.9688	-65.875	-64.9688	-65.375
		0.36	1.22	-64.2812	-64.5938	-62.8125	-63.3125	-62.9375	-62.8438	-64.1875	-64.5	-64.2812	-64.7812	-63.6875	-63.6875	-64.0625	-64.0312	-66.1875	-66.1562	-65.0312	-65.5312
		0.36	1.24	-64.5	-65	-63.0312	-63.5312	-63.0938	-63.125	-64.4688	-64.875	-64.3438	-65.0312	-63.7812	-63.9062	-64.3438	-64.0625	-66.5312	-66.25	-65.3438	-65.8125
		0.36	1.26	-64.5938	-65.25	-63.1562	-63.8438	-63.3125	-63.2188	-64.7188	-65.125	-64.5	-65.4062	-63.9062	-63.875	-64.5312	-64.4375	-66.7188	-66.3438	-65.5	-65.8125
		0.36	1.28	-64.7188	-65.5938	-63.3438	-64.0312	-63.3438	-63.375	-64.8438	-65.4688	-64.6562	-65.6875	-63.9375	-64.0312	-64.7188	-64.5938	-67.0938	-66.4688	-65.5625	-65.9375
		0.36	1.3	-64.875	-65.7812	-63.4688	-64.3438	-63.5938	-63.4375	-65.0312	-65.7188	-64.625	-65.9688	-63.875	-64.125	-64.8438	-64.7188	-67.2812	-66.5	-65.75	-66.0938
		0.36	1.32	-64.8125	-66	-63.4375	-64.4688	-63.6562	-63.4375	-65.3438	-65.9062	-64.7188	-66	-63.875	-64.0625	-64.8438	-64.9375	-67.5	-66.6875	-66	-66.0938
		0.36	1.34	-64.875	-66.1875	-63.5	-64.4688	-63.7188	-63.4062	-65.5312	-66	-64.7812	-66.125	-63.7188	-64.2188	-64.9375	-65.0625	-67.8438	-66.75	-66.0312	-66.1875
		0.36	1.36	-64.9688	-66.4375	-63.4062	-64.6562	-63.8438	-63.4375	-65.625	-66.1562	-64.7188	-66.3125	-63.5938	-64.1875	-64.9062	-65.125	-68.0625	-66.7188	-66.1875	-66.2812
		0.36	1.38	-64.8125	-66.7188	-63.4375	-64.75	-63.9375	-63.2188	-65.7188	-66.2812	-64.6875	-66.25	-63.4688	-64.2812	-64.6875	-65.1562	-68.1562	-66.7812	-66.3125	-66.1875
		0.36	1.4	-64.6562	-66.8125	-63.2812	-64.6562	-63.9375	-62.9375	-65.625	-66.25	-64.5	-66.1562	-63.2812	-64.2188	-64.5	-65.1562	-68.3125	-66.625	-66.2812	-66.1875
		0.36	1.42	-64.6562	-66.8438	-63	-64.6562	-63.7812	-62.7812	-65.5312	-66.2812	-64.125	-66.0312	-62.9062	-64.1875	-64.1562	-65.0938	-68.2812	-66.3125	-66.1875	-66.0625
		0.36	1.44	-64.2188	-66.875	-62.8125	-64.4062	-63.6562	-62.4688	-65.125	-66.0938	-63.8125	-65.6875	-62.5625	-64.0312	-63.6562	-65	-68.3438	-66.0312	-66	-65.8125
		0.36	1.46	-63.7188	-66.6562	-62.4688	-64.1562	-63.3125	-62.0625	-64.8438	-65.8125	-63.2812	-65.4375	-61.9375	-63.9375	-63.0625	-64.7812	-68.1562	-65.4375	-65.5	-65.4688
		0.36	1.48	-63.125	-66.25	-61.9375	-63.8125	-62.8438	-61.6562	-64.3125	-65.5312	-62.5312	-64.9375	-61.2812	-63.4062	-62.2188	-64.375	-67.7188	-64.6562	-64.875	-64.9375
		0.36	1.5	-62.3438	-65.8438	-61.4375	-63.25	-62.4062	-61.0312	-63.5312	-65.0938	-61.8438	-64.3438	-60.2812	-62.8125	-61.2812	-64.0312	-67.4375	-63.8438	-64.3438	-64.5625
		0.36	1.52	-61.4375	-65.0938	-60.875	-62.7812	-61.8438	-60.4062	-62.6562	-64.5	-60.9375	-63.7812	-59.0938	-62.0625	-60.3125	-63.1875	-66.875	-62.7188	-63.5	-63.9062
		0.36	1.54	-60.3438	-64.2812	-60.0625	-62.1875	-61.0938	-59.5312	-61.75	-63.875	-59.9062	-63.0938	-58.0625	-61.0938	-59.1875	-62.4688	-66.2812	-61.625	-62.6562	-63.1562
		0.36	1.56	-59.0312	-63.5	-59.2188	-61.3125	-60.4688	-58.5938	-60.6875	-63.125	-58.8438	-62.375	-56.7188	-60.1875	-58.0938	-61.625	-65.7188	-60.5312	-61.7812	-62.375
		0.36	1.58	-57.6875	-62.625	-58.4062	-60.5938	-59.7188	-57.6562	-59.6562	-62.375	-57.875	-61.5	-55.1875	-59.3438	-56.875	-60.7188	-64.9688	-59.1562	-61	-61.5938
		0.36	1.6	-56.3125	-61.75	-57.4375	-59.8125	-59	-56.6875	-58.7188	-61.5938	-56.8438	-60.6562	-54.0312	-58.25	-55.7188	-59.5938	-64.2812	-57.9062	-60.0938	-60.875
		0.36	1.62	-55	-60.9688	-56.5625	-59	-58.4062	-55.5312	-57.7188	-60.7812	-55.75	-59.9688	-52.7188	-57.3438	-54.7812	-58.8125	-63.6562	-56.75	-59.375	-60.1875
		0.36	1.64	-53.7188	-60.0312	-55.6875	-58.25	-57.6875	-54.5625	-56.7188	-59.8125	-54.75	-59.1875	-51.4688	-56.4375	-53.6875	-57.9062	-62.9688	-55.5	-58.625	-59.5
		0.36	1.66	-52.3438	-59.0312	-54.8125	-57.5312	-57.125	-53.625	-55.8438	-59.125	-53.6875	-58.4375	-50.4062	-55.5	-52.8125	-57.125	-62.4062	-54.4688	-57.875	-59.0312
		0.36	1.68	-51.1875	-58.4062	-54.0312	-57	-56.5938	-52.6562	-55	-58.4375	-52.9062	-57.6875	-49.2188	-54.9688	-52.0625	-56.4062	-61.9062	-53.5	-57.3125	-58.5
		0.36	1.7	-50.0938	-57.5625	-53.25	-56.375	-56.1562	-51.875	-54.2812	-57.625	-51.9062	-57.0938	-48.1875	-54.2812	-51.2812	-55.5625	-61.4688	-52.625	-56.875	-58.0625
		0.36	1.72	-49.0312	-56.7188	-52.5625	-55.6875	-55.5938	-51.125	-53.4375	-57.0625	-51	-56.4375	-47.0625	-53.8438	-50.6562	-54.9375	-61	-51.9062	-56.2812	-57.6562
		0.36	1.74	-48.0625	-56.1875	-52.0938	-55.1875	-55.3438	-50.4062	-52.875	-56.5	-50.3125	-55.9688	-45.5	-53.4688	-50.125	-54.5	-60.6562	-51.125	-55.8125	-57.3125
		0.36	1.76	-46.9688	-55.5625	-51.4688	-54.6875	-55.0312	-49.8438	-52.2812	-55.875	-49.5312	-55.5625	-42.7812	-53.0312	-49.6562	-54.0312	-60.25	-50.5312	-55.4688	-57
		0.36	1.78	-45.4375	-54.9375	-51.0312	-54.2812	-54.6562	-49.3125	-51.7188	-55.4688	-48.875	-55.125	-38.7812	-52.7188	-49.375	-53.7188	-60.125	-49.9062	-55.125	-56.7188
		0.36	1.8	-43.0312	-54.5312	-50.6562	-53.9375	-54.4688	-48.875	-51.2188	-55.0938	-48.1562	-54.8125	-33.2188	-52.625	-48.9375	-53.2188	-59.9375	-48.9688	-54.9062	-56.5
		0.36	1.82	-39.3438	-54.0625	-50.4062	-53.5625	-54.2812	-48.5	-50.7812	-54.5625	-47	-54.5625	-25.9062	-52.375	-48.5	-52.8438	-59.7812	-47.0938	-54.7188	-56.1875
		0.36	1.84	-34.1875	-53.6875	-50.2188	-53.2812	-54.0625	-48.0938	-50.3438	-54.3438	-44.8125	-54.3438	-16.25	-52.25	-48.0625	-52.5625	-59.6875	-44.0625	-54.5625	-56.0625
		0.36	1.86	-27.3125	-53.25	-49.8438	-53.125	-53.9688	-47.7188	-49.8438	-54	-41.6562	-54.0938	-5.9375	-52.1875	-46.9688	-52.3125	-59.5938	-39.875	-54.3438	-55.9688
		0.36	1.88	-18.3438	-53.0938	-49.6562	-52.8125	-53.8438	-47.1562	-49.5938	-53.6875	-37.1875	-53.8125	3.0625	-52.0312	-45.0312	-51.9062	-59.4688	-34.375	-54.25	-55.8125
		0.36	1.9	-8.4375	-52.8125	-49.5625	-52.6875	-53.7812	-45.9375	-49.1562	-53.5312	-31	-53.625	10.0312	-52.0312	-41.6875	-51.7812	-59.5	-26.7812	-54.125	-55.5938
		0.36	1.92	0.625	-52.5	-49.2188	-52.5312	-53.6562	-43.8438	-48.8125	-53.3125	-22.8125	-53.5	13.5	-51.9688	-37.0625	-51.5312	-59.2812	-17.3125	-53.9375	-55.5625
		0.36	1.94	7.75	-52.375	-49.1562	-52.375	-53.5625	-40.4688	-48.5312	-53.1562	-13.1875	-53.2188	13.6562	-51.9062	-31.0312	-51.4375	-59.3438	-7.5625	-54.0625	-55.4375
		0.36	1.96	12.0625	-52.1875	-49.0625	-52.25	-53.5625	-35.8125	-47.7812	-53.0312	-4.03125	-53.0625	10.8438	-51.9375	-22.6562	-51.3438	-59.3125	1.0625	-53.9375	-55.3438
		0.36	1.98	13.25	-52.0938	-48.8438	-52.3438	-53.5	-29.8438	-46.5312	-52.8125	3.28125	-53.0938	5.75	-51.8125	-12.6562	-51.1875	-59.25	7.21875	-53.875	-55.3438
		0.36	2	11.3125	-52.0312	-48.875	-52.1875	-53.4062	-21.75	-44.2812	-52.5625	8.5625	-52.9375	-0.78125	-51.7812	-2.78125	-51.1875	-59.3125	10.5	-53.9375	-55.3438
		0.36	2.02	7	-51.9688	-48.7812	-52.0938	-53.4062	-12.4062	-40.6562	-52.5	10.5	-52.875	-8.1875	-51.7188	5.625	-51.0312	-59.125	10.6562	-53.9375	-55.2812
		0.36	2.04	1.09375	-51.8125	-48.7812	-52.0312	-53.3438	-3.25	-35.9062	-52.375	9.4375	-52.8125	-15.9688	-51.625	11.375	-51	-59.2188	7.84375	-53.9688	-55.375
		0.36	2.06	-5.9375	-51.875	-48.6875	-51.9688	-53.3438	4.5	-29.5	-52.3438	6.21875	-52.7812	-23.4062	-51.625	13.6562	-51.0312	-59.2812	3.09375	-53.9062	-55.2812
		0.36	2.08	-13.4375	-51.8125	-48.625	-52.0312	-53.2812	9.5625	-21.0625	-52.2188	1.03125	-52.75	-30.25	-51.5938	12.9062	-50.9062	-59.125	-3.1875	-54	-55.3438
		0.36	2.1	-20.75	-51.7188	-48.6875	-52.0312	-53.4062	11.6562	-11.625	-52.0312	-5.34375	-52.7188	-36.3438	-51.5	9.1875	-50.9062	-59.0938	-10.4062	-54.0312	-55.3438
		0.36	2.12	-27.625	-51.75	-48.7812	-52	-53.2812	10.8438	-2.78125	-52.0938	-12.2188	-52.7188	-41.4688	-51.4688	3.71875	-50.9062	-58.9688	-17.625	-54.0312	-55.2812
		0.36	2.14	-33.8438	-51.75	-48.6562	-52.0625	-53.3438	7.375	4.46875	-52	-19.25	-52.6875	-45.6562	-51.3438	-3.03125	-50.875	-58.9688	-24.7812	-54.0625	-55.4062
		0.36	2.16	-39.1562	-51.7188	-48.7188	-52.0312	-53.3125	2.21875	9.03125	-51.9375	-26	-52.625	-49.2812	-51.3438	-10.625	-50.9375	-59	-31.3438	-54.1562	-55.4375
		0.36	2.18	-43.6562	-51.8125	-48.75	-52.0312	-53.2188	-4.21875	10.5	-51.9062	-32.0312	-52.6562	-51.9688	-51.25	-18.2812	-51	-59.0625	-36.9688	-54.1875	-55.4062
		0.36	2.2	-47.5312	-51.875	-48.7812	-52.0312	-53.2812	-11.3125	9.28125	-51.7812	-37.375	-52.625	-54.375	-51.3125	-25.5312	-50.9688	-59	-42.0312	-54.2812	-55.4062
		0.36	2.22	-50.5938	-51.8438	-48.8438	-52.0625	-53.3125	-18.5312	5.625	-51.75	-42.0625	-52.5625	-56.2812	-51.1875	-32.1875	-51.0938	-59.0312	-46.1562	-54.2188	-55.5938
		0.36	2.24	-53.0625	-51.875	-48.9375	-52.1562	-53.2188	-25.375	0.25	-51.75	-45.9062	-52.5	-57.5312	-51.25	-37.9062	-51.1875	-59.0312	-49.5625	-54.25	-55.5625
		0.36	2.26	-55.0938	-51.9688	-48.9375	-52.1562	-53.2812	-31.4688	-6.15625	-51.75	-49.125	-52.5625	-58.5938	-51.3438	-42.7188	-51.125	-59.125	-52.375	-54.3125	-55.625
		0.36	2.28	-56.7812	-52.0312	-49.0938	-52.2188	-53.3438	-36.875	-13.0938	-51.8125	-51.7812	-52.5	-59.5312	-51.1875	-46.7812	-51.3125	-59.1562	-54.7188	-54.4062	-55.7812
		0.36	2.3	-58.0312	-52.0312	-49.1875	-52.25	-53.5	-41.5312	-20.1562	-51.7188	-53.9062	-52.5	-60.125	-51.2812	-50.125	-51.3125	-59.0938	-56.5	-54.4375	-55.8438
		0.36	2.32	-58.9688	-52.125	-49.2188	-52.2812	-53.5	-45.4688	-26.7188	-51.7188	-55.6562	-52.5	-60.625	-51.4062	-52.8125	-51.4688	-59.2812	-58.0312	-54.5312	-55.875
		0.36	2.34	-59.7188	-52.0625	-49.3438	-52.3438	-53.5	-48.6875	-32.5625	-51.75	-57.0625	-52.4375	-60.9062	-51.25	-54.9375	-51.5625	-59.25	-59.3125	-54.5312	-55.875
		0.36	2.36	-60.2812	-52.125	-49.4062	-52.3438	-53.5312	-51.3438	-37.7812	-51.6562	-58.0938	-52.5312	-61.1875	-51.4375	-56.5312	-51.6562	-59.2812	-60.1875	-54.625	-56
		0.36	2.38	-60.5938	-52.3125	-49.5312	-52.4062	-53.5	-53.4062	-42.25	-51.6875	-58.8438	-52.5938	-61.5	-51.5312	-57.9688	-51.7188	-59.3125	-60.9688	-54.5938	-56.125
		0.36	2.4	-60.9062	-52.1875	-49.6562	-52.4062	-53.625	-55.25	-45.9688	-51.8125	-59.6562	-52.5312	-61.5	-51.5	-59.0312	-51.9688	-59.4062	-61.5	-54.6875	-56.25
		0.36	2.42	-61.1875	-52.3438	-49.6875	-52.5	-53.6875	-56.6875	-49.1562	-51.7188	-60.1562	-52.6875	-61.625	-51.6562	-59.75	-52	-59.3438	-61.9375	-54.875	-56.3438
		0.36	2.44	-61.25	-52.5	-49.8438	-52.625	-53.6875	-57.7188	-51.6875	-51.8438	-60.4688	-52.5938	-61.6562	-51.6875	-60.4688	-52.0938	-59.5	-62.3438	-54.9062	-56.4375
		0.36	2.46	-61.3438	-52.5625	-49.8438	-52.5312	-53.7812	-58.6875	-53.8125	-51.8438	-60.7812	-52.6875	-61.6562	-51.7188	-60.8438	-52.25	-59.5312	-62.5938	-54.9688	-56.5312
		0.36	2.48	-61.3438	-52.5625	-49.9375	-52.5312	-53.9062	-59.1875	-55.375	-51.8438	-61.0312	-52.75	-61.5938	-51.9375	-61.25	-52.3438	-59.5312	-62.75	-55	-56.6562
		0.36	2.5	-61.2812	-52.6562	-50.0312	-52.5938	-53.9375	-59.6875	-56.7812	-51.9375	-61.1562	-52.75	-61.6875	-52.0625	-61.5312	-52.5312	-59.6875	-62.9375	-55.0625	-56.6875
		0.36	2.52	-61.1875	-52.7812	-50.1562	-52.5625	-53.9688	-60.0312	-57.875	-51.9688	-61.375	-52.875	-61.6562	-52.1562	-61.7188	-52.5625	-59.7188	-62.9062	-55.1875	-56.8125
		0.36	2.54	-61.2188	-52.8125	-50.1562	-52.6875	-53.9688	-60.2188	-58.8125	-52.0312	-61.3438	-52.9688	-61.5625	-52.2812	-61.8125	-52.75	-59.7812	-63.0312	-55.2812	-56.9062
		0.36	2.56	-61.0625	-52.9062	-50.2812	-52.6562	-53.9062	-60.4062	-59.4375	-52.1875	-61.3438	-53	-61.6562	-52.4375	-61.9688	-52.9375	-59.9375	-63.1562	-55.4062	-56.9375
		0.36	2.58	-60.9688	-53	-50.2188	-52.5938	-53.9062	-60.5	-59.9688	-52.2188	-61.3438	-53.0938	-61.5938	-52.4688	-62.0312	-52.9375	-59.9062	-63.0625	-55.4062	-57.0312
		0.36	2.6	-60.9688	-53.1562	-50.3125	-52.625	-54	-60.5312	-60.3438	-52.3438	-61.4062	-53.1562	-61.5312	-52.75	-62.0312	-53.0938	-60.0312	-63	-55.4688	-57.25
		0.36	2.62	-60.9062	-53.2188	-50.3438	-52.6875	-54.0312	-60.625	-60.625	-52.4062	-61.4062	-53.25	-61.6562	-52.8438	-62.1562	-53.25	-60	-63.125	-55.625	-57.3438
		0.36	2.64	-60.7188	-53.3438	-50.3125	-52.6875	-53.875	-60.6875	-60.9062	-52.4375	-61.4688	-53.3125	-61.625	-52.875	-62.125	-53.25	-60.0625	-63.0312	-55.6562	-57.3438
		0.36	2.66	-60.6875	-53.3125	-50.375	-52.6562	-53.8438	-60.5	-60.9688	-52.5625	-61.4062	-53.4375	-61.5625	-53.0312	-62.0938	-53.4375	-60.1875	-63.0938	-55.7812	-57.5
		0.36	2.68	-60.6875	-53.375	-50.375	-52.6562	-53.8125	-60.5312	-61.1562	-52.625	-61.3438	-53.4062	-61.5938	-53.0938	-62.0625	-53.5938	-60.1562	-63.0625	-55.875	-57.5938
		0.36	2.7	-60.5938	-53.4375	-50.3438	-52.75	-53.7188	-60.4688	-61.2812	-52.625	-61.375	-53.5312	-61.625	-53.1875	-62.0625	-53.6875	-60.3125	-63	-55.9688	-57.625
		0.36	2.72	-60.5625	-53.5312	-50.375	-52.8125	-53.7812	-60.375	-61.2812	-52.8438	-61.4062	-53.6562	-61.625	-53.3125	-62.0938	-53.9062	-60.4062	-63.0938	-56.0938	-57.7188
		0.36	2.74	-60.5938	-53.5938	-50.4375	-52.7188	-53.8438	-60.375	-61.3125	-52.875	-61.3438	-53.625	-61.6875	-53.4375	-62.0312	-53.9688	-60.4375	-63.0938	-56.1875	-57.9062
		0.36	2.76	-60.5625	-53.6875	-50.4688	-52.75	-53.75	-60.3125	-61.25	-53	-61.3438	-53.75	-61.6875	-53.5	-62	-54.0312	-60.4375	-63	-56.25	-57.9062
		0.36	2.78	-60.4688	-53.8438	-50.5	-52.7812	-53.6875	-60.1562	-61.3438	-53.125	-61.375	-53.7812	-61.7188	-53.6875	-62.0312	-54.1875	-60.4688	-63	-56.2188	-57.9688
		0.36	2.8	-60.5312	-53.8438	-50.5	-52.7188	-53.7188	-60.1562	-61.3125	-53.0938	-61.375	-53.9375	-61.8125	-53.75	-62.0938	-54.2188	-60.5312	-63.0625	-56.4688	-58.125
		0.36	2.82	-60.5625	-53.9375	-50.5312	-52.7812	-53.7188	-60.2188	-61.3125	-53.2188	-61.375	-54	-61.7812	-53.875	-62	-54.4062	-60.5312	-63.0625	-56.4688	-58.1562
		0.36	2.84	-60.4688	-54.0312	-50.6562	-52.8438	-53.6875	-60.1562	-61.3125	-53.3438	-61.4375	-54	-61.9062	-54.0625	-62.125	-54.5	-60.625	-63.0625	-56.625	-58.1562
		0.36	2.86	-60.4688	-54.0938	-50.7188	-52.8438	-53.7188	-60.1562	-61.375	-53.3125	-61.3438	-54.1875	-61.9688	-54.0938	-62.1562	-54.5625	-60.7188	-63.125	-56.6562	-58.3125
		0.36	2.88	-60.5	-54.125	-50.625	-52.875	-53.75	-60.125	-61.3438	-53.4062	-61.4375	-54.25	-62	-54.25	-61.9688	-54.6562	-60.7188	-63.1875	-56.75	-58.4375
		0.36	2.9	-60.4688	-54.2812	-50.75	-52.9375	-53.7812	-60.0938	-61.4375	-53.5625	-61.4062	-54.3125	-62.0312	-54.4062	-62.0938	-54.8438	-60.7812	-63.1875	-56.75	-58.4688
		0.36	2.92	-60.4062	-54.375	-50.7812	-52.9375	-53.8125	-60.1562	-61.2812	-53.5625	-61.4375	-54.4375	-62.0938	-54.3125	-62.1562	-54.8438	-60.8125	-63.25	-56.875	-58.5938
		0.36	2.94	-60.5312	-54.3438	-50.8438	-53.0312	-53.8438	-60.0625	-61.3438	-53.6875	-61.4375	-54.5	-62.0938	-54.4062	-62.125	-54.9062	-60.8438	-63.2812	-57	-58.625
		0.36	2.96	-60.4375	-54.4688	-51	-53.0625	-53.8438	-60.0625	-61.4062	-53.7812	-61.5312	-54.4688	-62.1875	-54.6875	-62.2188	-55.0625	-60.9062	-63.4062	-57.0625	-58.625
		0.36	2.98	-60.5312	-54.5312	-51.0312	-53.0938	-53.875	-60.0938	-61.2812	-53.8438	-61.4688	-54.6562	-62.2812	-54.7188	-62.25	-55.1562	-60.9688	-63.4062	-57.0625	-58.8125
		0.36	3	-60.5312	-54.5312	-51.1562	-53.2188	-53.9375	-60.0938	-61.3438	-53.9375	-61.4688	-54.6562	-62.25	-54.8125	-62.25	-55.2188	-60.9375	-63.4062	-57.25	-58.8125
		0.36	3.02	-60.6562	-54.625	-51.2188	-53.3438	-53.9688	-60.0938	-61.2188	-54	-61.5	-54.6875	-62.3438	-54.9375	-62.3438	-55.3438	-61.0938	-63.5	-57.3125	-58.8125
		0.36	3.04	-60.6875	-54.75	-51.25	-53.25	-53.875	-60.0938	-61.25	-54.0312	-61.5625	-54.8125	-62.4375	-54.9688	-62.3125	-55.3438	-61	-63.5	-57.2812	-58.9375
		0.36	3.06	-60.7188	-54.7812	-51.3125	-53.4062	-54.0938	-60.0625	-61.3125	-54.1875	-61.5938	-54.875	-62.5	-55	-62.3125	-55.5312	-61	-63.5625	-57.4062	-59
		0.36	3.08	-60.75	-54.875	-51.5	-53.4688	-54.1562	-60.1562	-61.2188	-54.1875	-61.6875	-54.9375	-62.5625	-55.1875	-62.4062	-55.625	-61.125	-63.5625	-57.4688	-59.0312
		0.36	3.1	-60.75	-54.9688	-51.5312	-53.4688	-54.0938	-60.25	-61.3438	-54.375	-61.75	-54.9062	-62.6562	-55.25	-62.375	-55.6562	-61.0938	-63.6562	-57.5	-59.0312
		0.36	3.12	-60.8125	-55	-51.6562	-53.5625	-54.2812	-60.1875	-61.375	-54.4062	-61.7812	-55.0625	-62.5938	-55.375	-62.4688	-55.75	-61.0312	-63.7812	-57.5625	-59.125
		0.36	3.14	-60.9062	-55.0938	-51.7188	-53.6875	-54.3125	-60.2812	-61.4062	-54.4688	-61.8125	-55.0938	-62.7188	-55.4688	-62.5938	-55.8438	-61.125	-63.7812	-57.6875	-59.2188
		0.36	3.16	-60.9375	-55.1875	-51.75	-53.6875	-54.375	-60.3125	-61.3438	-54.5312	-61.75	-55.1875	-62.75	-55.4688	-62.5	-55.8438	-61.1562	-63.8125	-57.7188	-59.25
		0.36	3.18	-60.9062	-55.1875	-51.9062	-53.8125	-54.375	-60.375	-61.4688	-54.6562	-61.9688	-55.2188	-62.8438	-55.5625	-62.5312	-55.9688	-61.0938	-63.8125	-57.7812	-59.4062
		0.36	3.2	-61	-55.25	-51.9062	-53.8125	-54.4688	-60.4062	-61.4688	-54.7188	-61.9375	-55.2812	-62.9062	-55.6562	-62.5938	-56.0312	-61.1875	-63.875	-57.8125	-59.4062
		0.36	3.22	-61.125	-55.3438	-52.0312	-53.8438	-54.4688	-60.375	-61.4688	-54.7812	-61.9688	-55.4688	-63	-55.6562	-62.7188	-56.0312	-61.1562	-63.875	-57.9375	-59.4375
		0.36	3.24	-61.0312	-55.4375	-52.0625	-54	-54.5938	-60.4688	-61.4688	-54.875	-62.0312	-55.4688	-63	-55.7812	-62.7812	-56.1562	-61.1875	-63.9688	-57.9375	-59.5
		0.36	3.26	-61.1562	-55.375	-52.1562	-54.0312	-54.6562	-60.5	-61.4688	-54.8125	-62.0938	-55.4688	-63.125	-55.9375	-62.9062	-56.25	-61.25	-64.0625	-58.0312	-59.6562
		0.36	3.28	-61.3125	-55.4688	-52.2812	-54.0938	-54.75	-60.5312	-61.5	-55	-62.2188	-55.5625	-63.2812	-55.9688	-62.9062	-56.2812	-61.2188	-64.0625	-58.1562	-59.5625
		0.36	3.3	-61.3125	-55.5938	-52.4062	-54.2812	-54.6562	-60.625	-61.5625	-55.0625	-62.1875	-55.5938	-63.1562	-56.0312	-62.9688	-56.4062	-61.3125	-64.0312	-58.1562	-59.625
		0.36	3.32	-61.2188	-55.5625	-52.5312	-54.3125	-54.8125	-60.7812	-61.6562	-55.0312	-62.3125	-55.6875	-63.25	-56.0625	-63.0938	-56.4062	-61.3438	-64.2188	-58.1875	-59.6875
		0.36	3.34	-61.3438	-55.7188	-52.5625	-54.3125	-54.8438	-60.6562	-61.7188	-55.1875	-62.1875	-55.8125	-63.375	-56.0625	-63.1562	-56.5	-61.3125	-64.2188	-58.2812	-59.6875
		0.36	3.36	-61.4062	-55.75	-52.75	-54.375	-54.9062	-60.75	-61.75	-55.3125	-62.2812	-55.7812	-63.3438	-56.2188	-63.0938	-56.5	-61.4688	-64.2188	-58.4375	-59.7812
		0.36	3.38	-61.3438	-55.6875	-52.7188	-54.4688	-54.9062	-60.8438	-61.7188	-55.3125	-62.375	-55.7812	-63.4688	-56.125	-63.25	-56.5625	-61.5	-64.3438	-58.4375	-59.875
		0.36	3.4	-61.375	-55.8125	-52.7812	-54.4375	-55	-60.8438	-61.8125	-55.3438	-62.4375	-55.9375	-63.5	-56.0938	-63.3438	-56.625	-61.4375	-64.3125	-58.5	-59.875
		0.36	3.42	-61.5	-55.875	-52.9375	-54.5	-54.9688	-60.9688	-61.8438	-55.4062	-62.4688	-55.9062	-63.5	-56.1562	-63.3438	-56.6875	-61.4688	-64.4375	-58.5625	-59.8438
		0.36	3.44	-61.5	-56.0312	-52.9375	-54.625	-55.0312	-61.0312	-61.9062	-55.5	-62.5312	-56	-63.625	-56.25	-63.4062	-56.6875	-61.5312	-64.4375	-58.5312	-60.0312
		0.36	3.46	-61.5312	-56.0312	-52.9688	-54.5625	-55.0938	-61.0312	-61.9062	-55.5	-62.625	-56.125	-63.6875	-56.3438	-63.5312	-56.7812	-61.5	-64.4688	-58.5625	-60.0312
		0.36	3.48	-61.6562	-56.0312	-53.0625	-54.7812	-55.0938	-61.1562	-61.9375	-55.5938	-62.5938	-56.0938	-63.75	-56.25	-63.4688	-56.9062	-61.5312	-64.5312	-58.7188	-60.0312
		0.36	3.5	-61.7188	-56.1562	-53.125	-54.75	-55.0938	-61.125	-62	-55.5938	-62.7188	-56.1875	-63.8125	-56.4062	-63.5938	-56.9062	-61.5	-64.625	-58.7188	-60.0938
		0.36	3.52	-61.6875	-56.0938	-53.2188	-54.75	-55.2188	-61.1875	-62.0625	-55.7188	-62.7812	-56.2188	-63.9062	-56.4375	-63.6562	-56.9375	-61.5312	-64.6562	-58.8438	-60.1562
		0.36	3.54	-61.8438	-56.1562	-53.375	-54.9062	-55.2812	-61.2812	-62.0938	-55.7188	-62.7188	-56.25	-63.9688	-56.4375	-63.7188	-57.0625	-61.5625	-64.75	-58.8438	-60.125
		0.36	3.56	-61.9062	-56.3125	-53.4062	-54.9062	-55.2188	-61.2812	-62.2812	-55.8438	-62.875	-56.2812	-64.0312	-56.6562	-63.7812	-57.1562	-61.6875	-64.8438	-58.9375	-60.2188
		0.36	3.58	-61.9688	-56.3125	-53.4062	-54.9375	-55.375	-61.4062	-62.25	-55.8438	-62.9688	-56.3438	-64.0938	-56.6875	-63.8438	-57.1562	-61.625	-64.8438	-58.875	-60.3438
		0.36	3.6	-62.0312	-56.2812	-53.5	-55	-55.4688	-61.4688	-62.2812	-55.8438	-62.9062	-56.4688	-64.0938	-56.6875	-63.9062	-57.2812	-61.5938	-65	-59	-60.3438
		0.36	3.62	-62.125	-56.375	-53.5	-55	-55.5	-61.4688	-62.4375	-55.9375	-62.9688	-56.4688	-64.125	-56.6875	-64.0312	-57.25	-61.6562	-64.9688	-59.0625	-60.25
		0.36	3.64	-62.1875	-56.4375	-53.7188	-55.0312	-55.5	-61.5	-62.4375	-56.0625	-63.0312	-56.5	-64.1562	-56.8125	-63.9375	-57.3125	-61.7188	-65	-59.0312	-60.3125
		0.36	3.66	-62.1875	-56.4688	-53.7812	-55.1562	-55.5625	-61.625	-62.5312	-56.0625	-63.0938	-56.4688	-64.2188	-56.75	-64.0312	-57.375	-61.6875	-65.0312	-59.0938	-60.375
		0.36	3.68	-62.2812	-56.5312	-53.7812	-55.1562	-55.625	-61.625	-62.5312	-56.0625	-63.0938	-56.5625	-64.2812	-56.9062	-64.0938	-57.3125	-61.8438	-65.0938	-59.1562	-60.375
		0.36	3.7	-62.3438	-56.5625	-53.8438	-55.125	-55.5938	-61.6562	-62.6562	-56.1875	-63.2188	-56.6562	-64.3125	-57.0625	-64.2188	-57.4688	-61.7812	-65.125	-59.1875	-60.375
		0.36	3.72	-62.3438	-56.4375	-53.9375	-55.2812	-55.5625	-61.7812	-62.6875	-56.1562	-63.25	-56.625	-64.3125	-56.9375	-64.1562	-57.5	-61.8125	-65.2188	-59.2188	-60.4688
		0.36	3.74	-62.4375	-56.5312	-53.9375	-55.2188	-55.625	-61.6875	-62.7812	-56.3125	-63.3125	-56.7188	-64.4375	-57.0312	-64.375	-57.5	-61.8125	-65.1562	-59.1875	-60.4688
		0.36	3.76	-62.5312	-56.6562	-53.9688	-55.3438	-55.6875	-61.7812	-62.8438	-56.4062	-63.375	-56.75	-64.5312	-57.125	-64.3438	-57.5625	-61.7188	-65.25	-59.3125	-60.4375
		0.36	3.78	-62.5938	-56.6875	-54.0625	-55.3438	-55.6562	-61.8438	-62.9062	-56.4375	-63.4062	-56.7812	-64.5938	-57.0938	-64.4062	-57.6875	-61.875	-65.3438	-59.2812	-60.5312
		0.36	3.8	-62.5625	-56.75	-54.0625	-55.4688	-55.7188	-61.9062	-62.9688	-56.4375	-63.4062	-56.8438	-64.625	-57.1562	-64.5312	-57.625	-61.9062	-65.3438	-59.3125	-60.5625
		0.36	3.82	-62.6875	-56.8438	-54.2188	-55.5	-55.8125	-62	-62.9062	-56.5312	-63.5625	-56.9062	-64.7812	-57.3438	-64.5625	-57.75	-61.875	-65.3438	-59.375	-60.5938
		0.36	3.84	-62.7812	-56.875	-54.2812	-55.5312	-55.8438	-62.0938	-63	-56.4375	-63.6562	-56.9062	-64.8438	-57.25	-64.5938	-57.8125	-61.8125	-65.4688	-59.375	-60.5938
		0.36	3.86	-62.8438	-56.8438	-54.3125	-55.5938	-55.8438	-62.0312	-63.0938	-56.6562	-63.5625	-56.9062	-64.8438	-57.2812	-64.5625	-57.6875	-61.9375	-65.4375	-59.4688	-60.625
		0.36	3.88	-62.9062	-56.875	-54.2812	-55.5938	-55.9688	-62.1875	-63.0625	-56.625	-63.5625	-57	-64.9375	-57.4688	-64.625	-57.8438	-61.8438	-65.4688	-59.5	-60.6562
		0.36	3.9	-62.9688	-56.9375	-54.4375	-55.625	-55.875	-62.25	-63.1562	-56.6875	-63.6562	-57.0312	-64.9375	-57.4375	-64.6562	-57.8125	-61.875	-65.4688	-59.5938	-60.6562
		0.36	3.92	-63.0312	-57	-54.4375	-55.6875	-55.9688	-62.2188	-63.125	-56.6562	-63.6875	-57.0625	-64.9062	-57.5625	-64.7812	-57.9688	-61.875	-65.5312	-59.5312	-60.6562
		0.36	3.94	-63.0938	-57.0625	-54.5	-55.5938	-56.0312	-62.3438	-63.2188	-56.6562	-63.7188	-57.1562	-65.125	-57.5625	-64.7812	-58.0938	-61.8438	-65.5625	-59.5312	-60.7188
		0.36	3.96	-63.0938	-57.0625	-54.5625	-55.7188	-56.0938	-62.3438	-63.2188	-56.8125	-63.75	-57.1875	-65.1562	-57.5938	-64.7812	-58.0312	-61.9688	-65.7188	-59.625	-60.7812
		0.36	3.98	-63.1562	-57.0938	-54.5625	-55.7188	-55.9688	-62.3438	-63.2812	-56.875	-63.7812	-57.1875	-65.0312	-57.6562	-64.9688	-58.0312	-62	-65.6875	-59.625	-60.7812
		0.36	4	-63.1875	-57.0312	-54.7188	-55.8125	-56.0312	-62.4375	-63.3125	-56.8438	-63.8125	-57.25	-65.0938	-57.7188	-65	-58.0938	-61.9375	-65.7188	-59.6875	-60.8438
		0.36	4.02	-63.2812	-57.1875	-54.8438	-55.875	-56.1875	-62.5312	-63.4375	-56.875	-63.875	-57.2188	-65.2812	-57.8438	-64.9375	-58.0938	-62	-65.8438	-59.6875	-60.9062
		0.36	4.04	-63.375	-57.25	-54.75	-55.8125	-56.1562	-62.4688	-63.4375	-57.0312	-63.9375	-57.2812	-65.2812	-57.7812	-65.0312	-58.0938	-61.9688	-65.8125	-59.7812	-60.9375
		0.36	4.06	-63.4062	-57.1562	-54.8438	-55.9062	-56.0938	-62.5625	-63.4062	-56.9375	-64.0312	-57.375	-65.375	-57.9375	-65.0625	-58.1562	-62.0312	-65.8438	-59.7812	-61
		0.36	4.08	-63.4375	-57.25	-54.875	-55.9062	-56.25	-62.5938	-63.5312	-57.0312	-64.0312	-57.2812	-65.4688	-57.9375	-65.125	-58.1875	-62.0312	-65.875	-59.8438	-60.9688
		0.36	4.1	-63.4375	-57.3125	-54.9375	-55.9688	-56.2812	-62.625	-63.5	-57.0938	-64.125	-57.3438	-65.4062	-57.9375	-65.125	-58.2812	-62.1875	-65.9062	-59.875	-61
		0.36	4.12	-63.5625	-57.2812	-54.9688	-56.0938	-56.375	-62.7812	-63.6562	-57.0625	-64.0312	-57.4688	-65.5312	-57.9688	-65.1875	-58.4062	-62.0312	-65.9375	-59.9062	-61.0312
		0.36	4.14	-63.5625	-57.2812	-55.0312	-56.0938	-56.3125	-62.6875	-63.5938	-57.1562	-64.1562	-57.4062	-65.5625	-58.0938	-65.2188	-58.3125	-62.0938	-66.0938	-59.875	-61.0312
		0.36	4.16	-63.5312	-57.4375	-55	-56.0938	-56.375	-62.7188	-63.6875	-57.25	-64.3125	-57.4688	-65.5312	-58.0625	-65.3438	-58.4688	-62.0938	-66.1875	-59.9375	-60.9688
		0.36	4.18	-63.5938	-57.4375	-55.0625	-56.1562	-56.3438	-62.8438	-63.6562	-57.125	-64.25	-57.4375	-65.5625	-58.0625	-65.375	-58.4375	-62.0938	-66.0938	-59.9688	-61.1562
		0.36	4.2	-63.7188	-57.4688	-55.1875	-56.2812	-56.4062	-62.8438	-63.8438	-57.2188	-64.2812	-57.5	-65.5938	-58.125	-65.375	-58.4062	-62.1562	-66.2812	-60	-61.125
		0.36	4.22	-63.75	-57.375	-55.2188	-56.2812	-56.3438	-62.875	-63.8438	-57.4062	-64.3438	-57.5625	-65.625	-58.2188	-65.4062	-58.5	-62.1875	-66.1875	-60.0312	-61.0312
		0.36	4.24	-63.6875	-57.5	-55.375	-56.25	-56.4375	-63	-63.8125	-57.3125	-64.375	-57.6562	-65.6875	-58.25	-65.4688	-58.5312	-62.125	-66.0938	-60.0625	-61.0625
		0.36	4.26	-63.8125	-57.5	-55.25	-56.3125	-56.4375	-63	-64.0312	-57.4062	-64.3438	-57.5625	-65.8125	-58.375	-65.375	-58.4375	-62	-66.2812	-60.1875	-61.1562
		0.36	4.28	-63.8125	-57.6562	-55.25	-56.3125	-56.4375	-63.0938	-63.9375	-57.4062	-64.4062	-57.6562	-65.7812	-58.375	-65.5938	-58.4688	-62.125	-66.25	-60.125	-61.1562
		0.36	4.3	-63.8438	-57.5625	-55.4375	-56.3438	-56.5312	-63.0938	-64.0312	-57.4375	-64.5	-57.6562	-65.7812	-58.3125	-65.5938	-58.5625	-62.3125	-66.125	-60.1875	-61.125
		0.36	4.32	-63.9375	-57.5938	-55.4062	-56.5	-56.5312	-63.0938	-64.0312	-57.4375	-64.5938	-57.5938	-65.9062	-58.5	-65.5625	-58.5	-62.2188	-66.3125	-60.2812	-61.2188
		0.36	4.34	-64.0312	-57.6562	-55.4062	-56.4688	-56.4688	-63.125	-64.0312	-57.5312	-64.5312	-57.6562	-65.9062	-58.4688	-65.625	-58.5312	-62.2812	-66.4688	-60.25	-61.25
		0.36	4.36	-64.0312	-57.6562	-55.5	-56.4688	-56.5625	-63.2188	-64.0625	-57.5	-64.5625	-57.7188	-65.9062	-58.4688	-65.6875	-58.625	-62.25	-66.3438	-60.2812	-61.25
		0.36	4.38	-64.0312	-57.6562	-55.4688	-56.4062	-56.625	-63.3125	-64.1562	-57.5312	-64.5625	-57.7188	-66	-58.5	-65.7188	-58.7188	-62.1875	-66.5938	-60.3438	-61.25
		0.36	4.4	-64.0312	-57.75	-55.5	-56.4688	-56.5938	-63.2812	-64.0938	-57.5625	-64.5312	-57.75	-65.9688	-58.5	-65.7188	-58.7188	-62.3125	-66.4688	-60.4375	-61.2812
		0.36	4.42	-64.0312	-57.7812	-55.5	-56.4375	-56.625	-63.5	-64.2188	-57.5312	-64.6875	-57.6875	-66.125	-58.4375	-65.8125	-58.6875	-62.2812	-66.4688	-60.4688	-61.3438
		0.36	4.44	-64.0938	-57.8125	-55.6562	-56.4375	-56.6562	-63.375	-64.2812	-57.6562	-64.6562	-57.75	-66.0938	-58.5312	-65.8438	-58.6562	-62.2188	-66.5625	-60.4062	-61.2812
		0.36	4.46	-64.1562	-57.75	-55.5938	-56.5625	-56.625	-63.4375	-64.25	-57.7188	-64.6562	-57.7812	-66.125	-58.5938	-65.9062	-58.75	-62.3125	-66.5625	-60.5	-61.3438
		0.36	4.48	-64.1562	-57.8125	-55.7188	-56.5312	-56.6562	-63.5	-64.3438	-57.6562	-64.7812	-57.875	-66.1562	-58.625	-65.9062	-58.8125	-62.1875	-66.5312	-60.5625	-61.3125
		0.36	4.5	-64.1562	-57.875	-55.8125	-56.625	-56.6875	-63.4688	-64.375	-57.7812	-64.7812	-57.875	-66.1562	-58.6875	-65.9688	-58.75	-62.3438	-66.625	-60.5	-61.3438
		0.36	4.52	-64.2812	-57.8438	-55.6562	-56.75	-56.7188	-63.6562	-64.375	-57.7812	-64.75	-57.8438	-66.0938	-58.7188	-66	-58.8125	-62.3438	-66.7188	-60.5	-61.375
		0.36	4.54	-64.3438	-57.9375	-55.6875	-56.6875	-56.7812	-63.5938	-64.4375	-57.7188	-64.7812	-57.8125	-66.2188	-58.75	-66.0312	-58.8438	-62.2188	-66.7812	-60.5312	-61.4062
		0.36	4.56	-64.4062	-58.0312	-55.8438	-56.7188	-56.8438	-63.5312	-64.4688	-57.7812	-64.875	-57.9375	-66.2812	-58.6875	-66.125	-58.875	-62.1875	-66.8125	-60.5312	-61.375
		0.36	4.58	-64.3438	-57.9062	-55.7812	-56.6875	-56.9062	-63.5938	-64.5312	-57.7812	-64.8438	-58.0312	-66.3125	-58.7812	-66.1562	-58.9062	-62.2812	-66.8438	-60.5312	-61.4375
		0.36	4.6	-64.4375	-57.9375	-55.8125	-56.75	-56.9688	-63.6562	-64.625	-57.75	-64.875	-57.9688	-66.3438	-58.8438	-66.25	-58.9688	-62.2188	-66.7812	-60.5625	-61.5
		0.36	4.62	-64.5312	-58	-55.9375	-56.8438	-56.8438	-63.5938	-64.6562	-57.9062	-65	-58.0312	-66.4062	-58.7812	-66.1562	-58.9688	-62.1875	-66.8438	-60.5938	-61.5
		0.36	4.64	-64.5625	-58	-55.9375	-56.8438	-56.9062	-63.6875	-64.5938	-57.9688	-65	-58.0938	-66.5	-58.875	-66.2812	-59.0312	-62.3125	-66.8438	-60.5	-61.5
		0.36	4.66	-64.5938	-57.9688	-55.9688	-56.875	-56.9688	-63.8125	-64.7812	-57.875	-65	-58.0312	-66.4375	-58.8438	-66.25	-59.0938	-62.3125	-66.8438	-60.5938	-61.5625
		0.36	4.68	-64.5625	-58.0312	-56	-56.8125	-56.9375	-63.75	-64.8125	-58	-65	-58.0938	-66.5	-58.875	-66.2188	-59.0938	-62.3438	-66.9688	-60.625	-61.5625
		0.36	4.7	-64.75	-58.0312	-55.9375	-56.9062	-56.9375	-63.7812	-64.7188	-58.125	-65.0312	-58	-66.5	-58.8125	-66.3125	-59.0938	-62.4062	-66.9062	-60.5938	-61.4688
		0.36	4.72	-64.7188	-58.0312	-56.0625	-57	-57.0625	-63.9688	-64.8438	-57.9688	-65	-58.1562	-66.5625	-58.9375	-66.3438	-59.125	-62.4062	-66.9688	-60.6562	-61.5938
		0.36	4.74	-64.75	-58.0625	-56.1562	-56.875	-57.0938	-63.875	-64.8438	-58	-65.0938	-58.0312	-66.625	-58.9688	-66.3438	-59.0625	-62.3438	-66.9688	-60.75	-61.6875
		0.36	4.76	-64.8438	-58.0938	-56.0625	-56.9688	-57.0625	-64.0312	-64.8438	-58.125	-65.2188	-58.0312	-66.625	-58.9375	-66.2812	-59.1562	-62.4375	-67	-60.7812	-61.5938
		0.36	4.78	-64.875	-58.0938	-56.1562	-57.0312	-57.0625	-64.0312	-64.875	-58.0312	-65.0938	-58.125	-66.7188	-59.0312	-66.4688	-59.2188	-62.4375	-67.0312	-60.8125	-61.6562
		0.36	4.8	-64.75	-58.0312	-56.1875	-57.0312	-57.1562	-64.0312	-64.9688	-58.1562	-65.1562	-58.2188	-66.5938	-59.0625	-66.4688	-59.125	-62.4375	-67.0938	-60.8125	-61.5938
		0.36	4.82	-64.8125	-58.125	-56.0938	-57.0938	-57.0625	-64.0312	-64.9375	-58.1562	-65.25	-58.2812	-66.7188	-59.125	-66.4375	-59.25	-62.5	-67.1562	-60.875	-61.5938
		0.36	4.84	-64.8438	-58.2188	-56.2188	-57.2188	-57.125	-64.0312	-65	-58.1562	-65.2188	-58.3438	-66.7188	-59.1562	-66.4062	-59.3438	-62.4375	-67.1562	-60.8438	-61.5938
		0.36	4.86	-64.8438	-58.125	-56.3438	-57.125	-57.25	-64.125	-65.0312	-58.25	-65.2812	-58.3125	-66.7812	-59.2188	-66.5	-59.2188	-62.3438	-67.2188	-60.8125	-61.6562
		0.36	4.88	-64.875	-58.1875	-56.3438	-57.0938	-57.2812	-64.1875	-65.0938	-58.2188	-65.3125	-58.3125	-66.875	-59.2188	-66.5625	-59.3438	-62.4688	-67.25	-60.875	-61.625
		0.36	4.9	-65.0312	-58.25	-56.1875	-57.2188	-57.2188	-64.2188	-65.0938	-58.1562	-65.2812	-58.3438	-66.8125	-59.2812	-66.6562	-59.25	-62.375	-67.1875	-60.8125	-61.6562
		0.36	4.92	-65	-58.1875	-56.375	-57.2188	-57.1875	-64.1875	-65.2188	-58.25	-65.3125	-58.4062	-66.8125	-59.4375	-66.625	-59.2812	-62.4062	-67.25	-60.875	-61.5938
		0.36	4.94	-65	-58.1875	-56.3125	-57.2188	-57.25	-64.1875	-65.0938	-58.3438	-65.4375	-58.3438	-66.7812	-59.2188	-66.5938	-59.2812	-62.4688	-67.3438	-60.9062	-61.7188
		0.36	4.96	-65.0625	-58.25	-56.375	-57.2812	-57.2812	-64.2812	-65.1875	-58.25	-65.4375	-58.4375	-66.8125	-59.3438	-66.75	-59.4375	-62.5	-67.3125	-60.9688	-61.6875
		0.36	4.98	-65.0625	-58.3125	-56.4062	-57.25	-57.25	-64.25	-65.25	-58.3125	-65.4062	-58.3438	-66.875	-59.3125	-66.7188	-59.3438	-62.4688	-67.25	-60.9062	-61.625
		0.46	0	-60.5938	-59.9062	-60.1562	-60	-60.7188	-60.2188	-60.2188	-60.1875	-60.5625	-61.75	-61.5625	-61.8125	-61.5312	-62.2812	-62.5312	-62.5938	-62.7188	-63.75	-63.8438	-64.5312	-63.7188
		0.46	0.02	-60.5938	-59.9375	-60.2188	-59.9688	-60.7188	-60.1875	-60.2812	-60.2812	-60.5	-61.8125	-61.6875	-61.7812	-61.5312	-62.2812	-62.5	-62.6562	-62.625	-63.7188	-63.6562	-64.5312	-63.8125
		0.46	0.04	-60.5938	-59.8125	-60.2812	-60.0312	-60.75	-60.2188	-60.1875	-60.2188	-60.5	-61.7812	-61.6562	-61.8438	-61.5312	-62.3125	-62.4375	-62.625	-62.5938	-63.6562	-63.7188	-64.4688	-63.7812
		0.46	0.06	-60.6562	-59.9062	-60.2812	-60	-60.625	-60.1562	-60.3125	-60.1875	-60.5312	-61.8125	-61.7188	-61.875	-61.5625	-62.2188	-62.4062	-62.7188	-62.6562	-63.7188	-63.6875	-64.5312	-63.7812
		0.46	0.08	-60.5312	-59.875	-60.2188	-59.9688	-60.625	-60.2188	-60.25	-60.1875	-60.5	-61.7188	-61.5938	-61.875	-61.5	-62.2188	-62.5312	-62.6562	-62.5625	-63.7188	-63.75	-64.5312	-63.7188
		0.46	0.1	-60.5	-59.9062	-60.25	-60.0625	-60.625	-60.2188	-60.2812	-60.125	-60.5312	-61.75	-61.5938	-62	-61.5938	-62.2188	-62.4688	-62.5625	-62.5625	-63.7188	-63.6875	-64.4062	-63.7188
		0.46	0.12	-60.5625	-59.8438	-60.2188	-60.0938	-60.5938	-60.1875	-60.125	-60.1562	-60.5312	-61.7812	-61.5312	-61.9062	-61.5312	-62.2812	-62.5	-62.5625	-62.625	-63.6875	-63.6562	-64.5	-63.8125
		0.46	0.14	-60.5	-59.8438	-60.2188	-59.9375	-60.625	-60.25	-60.25	-60.25	-60.5	-61.8125	-61.6562	-61.9375	-61.5	-62.1562	-62.5	-62.6562	-62.5625	-63.7188	-63.6875	-64.5625	-63.7812
		0.46	0.16	-60.5	-59.875	-60.2188	-60.0312	-60.6875	-60.1875	-60.1875	-60.25	-60.5312	-61.7812	-61.5938	-61.9375	-61.5	-62.2812	-62.5	-62.5312	-62.5312	-63.7812	-63.75	-64.5	-63.7188
		0.46	0.18	-60.5	-59.9375	-60.2188	-60.0312	-60.6562	-60.25	-60.1875	-60.1875	-60.5	-61.8438	-61.6562	-61.75	-61.5	-62.3125	-62.5312	-62.5625	-62.5938	-63.7188	-63.6875	-64.5312	-63.8125
		0.46	0.2	-60.5625	-59.9062	-60.2188	-60.0312	-60.6562	-60.1875	-60.2188	-60.1875	-60.5	-61.8125	-61.7188	-61.875	-61.5	-62.25	-62.5312	-62.6562	-62.4375	-63.7812	-63.6562	-64.5312	-63.7188
		0.46	0.22	-60.5	-59.9062	-60.25	-60.0312	-60.6562	-60.1562	-60.1562	-60.1562	-60.4375	-61.7188	-61.6562	-61.9062	-61.5	-62.2812	-62.5625	-62.5312	-62.625	-63.75	-63.625	-64.5625	-63.7188
		0.46	0.24	-60.5625	-59.9062	-60.25	-60.0625	-60.6875	-60.1562	-60.25	-60.1875	-60.4688	-61.8438	-61.625	-61.875	-61.5625	-62.2188	-62.5	-62.5625	-62.5	-63.8125	-63.6562	-64.5625	-63.8438
		0.46	0.26	-60.5938	-59.9062	-60.25	-60.0938	-60.625	-60.2188	-60.1875	-60.25	-60.5	-61.7188	-61.6875	-61.8125	-61.5	-62.3125	-62.4688	-62.6562	-62.4688	-63.7812	-63.75	-64.5312	-63.8438
		0.46	0.28	-60.5312	-59.9375	-60.1562	-60	-60.7188	-60.125	-60.2188	-60.2188	-60.5	-61.7812	-61.625	-61.8438	-61.5938	-62.2812	-62.5	-62.6562	-62.5938	-63.75	-63.6875	-64.4375	-63.8125
		0.46	0.3	-60.5312	-59.9375	-60.125	-60	-60.6562	-60.1562	-60.125	-60.2188	-60.4688	-61.75	-61.6562	-61.9375	-61.5938	-62.4062	-62.5	-62.5625	-62.5312	-63.8125	-63.6562	-64.5312	-63.875
		0.46	0.32	-60.5625	-59.9375	-60.1875	-60.0938	-60.6562	-60.125	-60.1562	-60.2812	-60.5	-61.75	-61.7188	-61.8125	-61.5312	-62.3125	-62.5	-62.6562	-62.5	-63.8125	-63.6562	-64.5625	-63.875
		0.46	0.34	-60.5	-59.8438	-60.1875	-60.0938	-60.6875	-60.1562	-60.2188	-60.2188	-60.5312	-61.7188	-61.6562	-61.8438	-61.5625	-62.2188	-62.5	-62.6562	-62.5	-63.7188	-63.7188	-64.4688	-63.8438
		0.46	0.36	-60.5	-60	-60.0938	-59.9688	-60.6562	-60.1562	-60.1562	-60.2188	-60.5938	-61.75	-61.6562	-61.7812	-61.5938	-62.1875	-62.5312	-62.6562	-62.4688	-63.8125	-63.7188	-64.5	-63.875
		0.46	0.38	-60.5312	-60	-60.1562	-60.0938	-60.6562	-60.1875	-60.1562	-60.1875	-60.5	-61.7812	-61.7188	-61.7188	-61.5312	-62.2812	-62.4062	-62.6562	-62.5312	-63.7812	-63.6875	-64.5312	-63.8125
		0.46	0.4	-60.625	-59.9375	-60.1562	-60.125	-60.7188	-60.1562	-60.1875	-60.2188	-60.5	-61.8438	-61.6562	-61.7188	-61.5625	-62.3438	-62.5	-62.6875	-62.5312	-63.75	-63.7188	-64.4688	-63.8125
		0.46	0.42	-60.5312	-59.9688	-60.1562	-59.9688	-60.7188	-60.2188	-60.1875	-60.1875	-60.5625	-61.7188	-61.6875	-61.5938	-61.4688	-62.3125	-62.5	-62.6562	-62.5	-63.8438	-63.6562	-64.5	-63.8438
		0.46	0.44	-60.5312	-59.9375	-60.1562	-60.0312	-60.5938	-60.1562	-60.1562	-60.125	-60.4375	-61.75	-61.6875	-61.5	-61.5	-62.2188	-62.5	-62.5938	-62.5312	-63.8125	-63.6875	-64.5312	-63.7812
		0.46	0.46	-60.5938	-59.9375	-60.2188	-60.0625	-60.6562	-60.1562	-60.1875	-60.1875	-60.5312	-61.7812	-61.5938	-61.375	-61.5312	-62.2812	-62.4688	-62.6875	-62.5312	-63.7812	-63.6562	-64.5	-63.7812
		0.46	0.48	-60.4375	-59.7188	-60.0312	-59.8438	-60.5	-60.125	-60	-60.0312	-60.375	-61.625	-61.5	-61.1875	-61.3438	-62.1562	-62.375	-62.5	-62.4062	-63.7188	-63.5938	-64.4062	-63.6875
		0.46	0.5	-61.1562	-60.6875	-60.8125	-60.6875	-61.3438	-60.7188	-60.7188	-60.7188	-61.0938	-62.3438	-62.2188	-61.75	-61.9688	-62.8438	-63	-63.25	-63.0625	-64.3125	-64.1562	-65.0938	-64.3125
		0.46	0.52	-65.5312	-65.1562	-65.25	-65.1875	-65.8125	-64.75	-64.7188	-64.6875	-65.0938	-66.0938	-65.9688	-65.5	-65.875	-66.8438	-67.0312	-67.2812	-67.125	-68.0312	-67.9375	-68.75	-68.0312
		0.46	0.54	-68.4062	-68.1562	-68.1875	-67.9688	-68.6875	-67.375	-67.4062	-67.3438	-67.75	-68.6875	-68.5625	-68.0938	-68.4062	-69.6875	-69.9062	-70.0625	-69.8438	-70.75	-70.4688	-71.4375	-70.6562
		0.46	0.56	-68.2812	-67.9062	-67.9688	-67.8125	-68.5	-67.3125	-67.2812	-67.25	-67.6562	-68.8125	-68.625	-68.0938	-68.5	-69.6562	-69.9688	-70.0312	-69.875	-70.7812	-70.6562	-71.5938	-70.8125
		0.46	0.58	-66.9375	-66.7188	-66.9375	-66.6875	-67.4062	-66.4062	-66.2812	-66.3125	-66.6875	-67.875	-67.6875	-67.1562	-67.5938	-68.6562	-68.875	-69.0312	-68.9062	-69.9375	-69.8125	-70.75	-69.9375
		0.46	0.6	-65.6562	-65.4062	-65.6562	-65.4375	-66.0312	-65.1562	-65.2812	-65.25	-65.6562	-66.8125	-66.5938	-66.0312	-66.5	-67.4375	-67.6875	-67.8438	-67.5312	-68.9375	-68.7188	-69.6875	-68.875
		0.46	0.62	-64.4062	-64.1875	-64.4375	-64.1875	-64.8438	-64.0625	-64.2188	-64.25	-64.5	-65.8125	-65.6562	-65	-65.5	-66.3438	-66.5625	-66.7188	-66.5625	-67.8125	-67.6562	-68.7812	-67.7812
		0.46	0.64	-63.3438	-63.3125	-63.4688	-63.25	-63.9062	-63.3125	-63.375	-63.3438	-63.6875	-64.9375	-64.8438	-64.0625	-64.6875	-65.3438	-65.7188	-65.75	-65.6562	-67	-66.9062	-67.7188	-66.9688
		0.46	0.66	-62.6562	-62.5625	-62.75	-62.5312	-63.1875	-62.6562	-62.6875	-62.6875	-63.0938	-64.2188	-64.0938	-63.5	-64.0312	-64.6875	-64.9062	-65.0938	-64.9375	-66.4688	-66.1562	-67	-66.3125
		0.46	0.68	-62.0938	-61.9062	-62.2188	-62.0625	-62.5938	-62.1875	-62.2188	-62.2188	-62.5625	-63.8438	-63.6562	-62.9688	-63.6562	-64.1562	-64.4688	-64.5625	-64.4688	-65.7188	-65.5625	-66.5938	-65.7812
		0.46	0.7	-61.5938	-61.5312	-61.7188	-61.625	-62.1562	-61.8125	-61.75	-61.7188	-62.1562	-63.3438	-63.2812	-62.625	-63.1875	-63.7812	-64.0938	-64.1562	-64.0312	-65.375	-65.25	-66.1875	-65.4062
		0.46	0.72	-61.2812	-61.2812	-61.4688	-61.2812	-61.875	-61.4688	-61.5	-61.4062	-61.9062	-63.2188	-62.9688	-62.3438	-62.9375	-63.4062	-63.7188	-64.0312	-63.5938	-65.1875	-65	-65.9688	-65.2188
		0.46	0.74	-61	-61	-61.25	-61.1562	-61.5625	-61.2812	-61.25	-61.25	-61.5625	-62.9688	-62.7188	-61.9375	-62.7188	-63.2812	-63.5	-63.6562	-63.4688	-64.9062	-64.7188	-65.75	-64.9062
		0.46	0.76	-60.8438	-60.9062	-61.0312	-60.9062	-61.4375	-61.0312	-61.0938	-61.125	-61.5	-62.7188	-62.5625	-61.8438	-62.5938	-63.125	-63.375	-63.5312	-63.375	-64.75	-64.5938	-65.4688	-64.8438
		0.46	0.78	-60.6875	-60.7188	-61	-60.6875	-61.375	-60.875	-61	-61	-61.3438	-62.625	-62.4062	-61.6875	-62.3438	-62.9375	-63.2812	-63.5	-63.1875	-64.625	-64.5	-65.3438	-64.5938
		0.46	0.8	-60.5938	-60.5938	-60.8438	-60.6562	-61.2812	-60.8125	-60.9688	-60.8438	-61.1562	-62.5	-62.4375	-61.5	-62.2812	-62.8438	-63.1562	-63.2812	-63.0938	-64.5	-64.2812	-65.25	-64.5
		0.46	0.82	-60.5938	-60.5312	-60.75	-60.625	-61.1562	-60.625	-60.8125	-60.875	-61.0625	-62.3125	-62.2812	-61.4375	-62.1875	-62.8438	-63.0938	-63.1562	-63.0312	-64.4062	-64.0625	-65.1562	-64.375
		0.46	0.84	-60.5312	-60.5312	-60.5938	-60.5625	-61.1875	-60.625	-60.7188	-60.6875	-61.0312	-62.3125	-62.1875	-61.4062	-62	-62.7188	-63.0625	-63.125	-62.9062	-64.4062	-64.1562	-65.0312	-64.4062
		0.46	0.86	-60.4062	-60.3438	-60.5625	-60.4375	-60.9688	-60.5625	-60.7812	-60.6875	-61.0312	-62.3438	-62.125	-61.2812	-61.9688	-62.625	-62.9688	-63.0625	-62.8438	-64.2812	-64.1562	-65.0312	-64.2188
		0.46	0.88	-60.4375	-60.3125	-60.625	-60.375	-60.9062	-60.4688	-60.625	-60.6562	-60.9375	-62.1562	-62.0625	-61.2188	-61.9375	-62.625	-62.75	-63.0625	-62.75	-64.2812	-64.0312	-64.9688	-64.1875
		0.46	0.9	-60.3125	-60.25	-60.5312	-60.4062	-60.9688	-60.5	-60.5938	-60.5312	-60.9375	-62.1562	-61.9375	-61.2188	-61.875	-62.5938	-62.8438	-62.9688	-62.7188	-64.25	-64.0938	-64.9688	-64.1562
		0.46	0.92	-60.2812	-60.25	-60.5	-60.3438	-60.875	-60.4375	-60.5312	-60.5625	-60.8438	-62.0938	-61.9688	-61.1562	-61.875	-62.4375	-62.8438	-62.9688	-62.75	-64.0938	-63.9688	-64.9688	-64.125
		0.46	0.94	-60.2812	-60.2188	-60.4375	-60.3125	-60.8125	-60.3438	-60.5625	-60.5	-60.7812	-62.0938	-61.875	-61.1562	-61.7812	-62.5	-62.75	-62.9375	-62.5312	-64.0625	-63.8438	-64.9062	-64.0938
		0.46	0.96	-60.3125	-60.3125	-60.4375	-60.3438	-60.8125	-60.375	-60.4062	-60.5	-60.8125	-62	-61.8125	-61.2188	-61.7812	-62.4375	-62.7188	-62.9062	-62.5312	-64.0625	-63.875	-64.8438	-64.125
		0.46	0.98	-60.2812	-60.1875	-60.4688	-60.2812	-60.875	-60.3438	-60.5	-60.4688	-60.5938	-62	-61.8438	-61.1562	-61.7812	-62.4375	-62.7188	-62.8438	-62.625	-64.0312	-63.9375	-64.875	-64.0938
		0.46	1	-60.3438	-60.2812	-60.5938	-60.375	-60.9375	-60.5312	-60.4375	-60.5312	-60.8125	-62.125	-61.8438	-61.1875	-61.8125	-62.4375	-62.625	-62.8438	-62.5312	-64.0938	-63.8125	-64.8125	-64.0312
		0.46	1.02	-60.4688	-60.4688	-60.7188	-60.4062	-61.0938	-60.6562	-60.625	-60.7188	-61	-62.2812	-62.0625	-61.4062	-61.9688	-62.4375	-62.5938	-62.75	-62.5312	-64.0312	-63.875	-64.7812	-64.0938
		0.46	1.04	-60.6562	-60.5	-60.875	-60.5625	-61.2188	-60.75	-60.7812	-60.9375	-61.0625	-62.4375	-62.25	-61.5	-62.2188	-62.3438	-62.6562	-62.7812	-62.5625	-64.0312	-63.9375	-64.8438	-64.0938
		0.46	1.06	-60.7812	-60.7188	-61	-60.7188	-61.3438	-61.0312	-61	-61.1562	-61.3125	-62.7188	-62.375	-61.7188	-62.4062	-62.375	-62.6562	-62.8438	-62.5	-64.125	-63.9375	-64.9688	-64.0938
		0.46	1.08	-61	-60.9688	-61.25	-61	-61.5938	-61.3125	-61.2812	-61.2188	-61.5938	-63	-62.75	-62.0312	-62.5938	-62.4375	-62.625	-62.8438	-62.5938	-64.2188	-64.0312	-65	-64.25
		0.46	1.1	-61.2188	-61.125	-61.4375	-61.3125	-61.8125	-61.5	-61.4375	-61.5625	-61.875	-63.0938	-62.9688	-62.2812	-62.875	-62.5312	-62.8125	-63	-62.8125	-64.4062	-64.2188	-65.125	-64.375
		0.46	1.12	-61.5	-61.4375	-61.7188	-61.5312	-61.9688	-61.7812	-61.7812	-61.8125	-62.125	-63.5	-63.25	-62.625	-63.1875	-62.6875	-63	-63.2812	-62.9688	-64.5938	-64.4062	-65.375	-64.5625
		0.46	1.14	-61.6562	-61.6875	-61.9375	-61.6562	-62.2812	-62.0625	-62.0625	-62	-62.4688	-63.8125	-63.5312	-62.875	-63.4375	-62.9688	-63.0938	-63.2812	-63.0938	-64.7812	-64.5312	-65.4688	-64.7812
		0.46	1.16	-62	-61.9062	-62.2188	-62.0938	-62.5312	-62.3438	-62.3438	-62.3125	-62.7188	-64.0312	-63.9062	-63.25	-63.8438	-63.2188	-63.375	-63.5625	-63.25	-65	-64.8438	-65.8438	-65
		0.46	1.18	-62.4062	-62.2188	-62.5	-62.3438	-62.8125	-62.6875	-62.6875	-62.625	-62.9062	-64.4375	-64.0938	-63.5	-64.0312	-63.2812	-63.625	-63.8438	-63.4375	-65.3438	-65.0938	-66.0625	-65.25
		0.46	1.2	-62.5938	-62.5312	-62.7188	-62.5	-63.0312	-63	-63.0312	-62.9375	-63.1875	-64.6562	-64.375	-63.7812	-64.375	-63.5	-63.7812	-63.9688	-63.7188	-65.5312	-65.2812	-66.25	-65.4688
		0.46	1.22	-62.8125	-62.7188	-63	-62.7812	-63.4375	-63.1875	-63.2812	-63.3125	-63.5	-64.9375	-64.7812	-64.0312	-64.7188	-63.8125	-64.0312	-64.125	-64.0312	-65.8438	-65.5625	-66.5312	-65.6875
		0.46	1.24	-63.0938	-63.0312	-63.4062	-63.0312	-63.6562	-63.6562	-63.5	-63.5312	-63.7188	-65.25	-65.0312	-64.3438	-65.0312	-64.0312	-64.25	-64.5	-64.1875	-66.1562	-65.875	-66.9062	-66.0312
		0.46	1.26	-63.4375	-63.3438	-63.5625	-63.2812	-63.8125	-63.8125	-63.8438	-63.8438	-64.0625	-65.5	-65.2188	-64.75	-65.125	-64.25	-64.4375	-64.6875	-64.4375	-66.4375	-66.0938	-67.0625	-66.2812
		0.46	1.28	-63.5625	-63.5312	-63.7812	-63.4688	-64.1562	-64.0938	-64.1562	-64.125	-64.3438	-65.8125	-65.5625	-65.0312	-65.4062	-64.5312	-64.6875	-64.9062	-64.6562	-66.7188	-66.2812	-67.3125	-66.5312
		0.46	1.3	-63.75	-64	-64.0625	-63.6562	-64.3438	-64.3438	-64.3438	-64.25	-64.5625	-66.1875	-65.8125	-65.25	-65.6875	-64.7812	-64.8438	-65.2812	-64.8438	-66.875	-66.5938	-67.4688	-66.8438
		0.46	1.32	-64.0312	-64.0938	-64.25	-63.9062	-64.5312	-64.5312	-64.5938	-64.4062	-64.875	-66.375	-66	-65.4688	-65.8125	-64.9375	-65.0625	-65.5312	-65.0625	-67.0312	-66.6875	-67.5312	-67.0938
		0.46	1.34	-64.1562	-64.375	-64.3125	-64.0312	-64.8125	-64.75	-64.8438	-64.5938	-65.0312	-66.5938	-66.1562	-65.6875	-65.9375	-65.1562	-65.0625	-65.6875	-65.25	-67.125	-66.8125	-67.625	-67.1875
		0.46	1.36	-64.375	-64.5312	-64.4375	-64.0312	-64.9062	-64.9688	-65	-64.5312	-65.1562	-66.7812	-66.375	-65.8438	-66.125	-65.1875	-65.2188	-65.8125	-65.3438	-67.375	-66.875	-67.6875	-67.4375
		0.46	1.38	-64.5	-64.75	-64.625	-64.1875	-64.9688	-65.0625	-65.125	-64.7812	-65.3438	-67	-66.4375	-66.0625	-66.25	-65.25	-65.1875	-66.125	-65.5312	-67.4688	-66.875	-67.5625	-67.6875
		0.46	1.4	-64.5625	-64.9375	-64.6562	-64.0938	-65.0625	-65.1562	-65.25	-64.8438	-65.6562	-67.2812	-66.4688	-66.3125	-66.4375	-65.2812	-65.25	-66.1875	-65.8125	-67.625	-66.9375	-67.5625	-67.6562
		0.46	1.42	-64.5	-65.0625	-64.8125	-64.125	-65.0312	-65.2812	-65.25	-64.875	-65.6562	-67.5312	-66.5938	-66.4062	-66.4688	-65.2812	-65.375	-66.375	-65.875	-67.75	-66.9062	-67.5	-67.9688
		0.46	1.44	-64.4375	-65.1875	-65	-64.0938	-64.9375	-65.25	-65.1562	-65	-65.8438	-67.5938	-66.5938	-66.5	-66.6562	-65.1875	-65.3438	-66.4375	-66	-67.9062	-66.8125	-67.375	-68.2188
		0.46	1.46	-64.4062	-65.4062	-65.1562	-64.0312	-64.9688	-65.375	-65.25	-65	-66.0312	-67.5	-66.6562	-66.6562	-66.7188	-65.1875	-65.25	-66.375	-66.0312	-67.8438	-66.7812	-67.2188	-68.125
		0.46	1.48	-64.2812	-65.3125	-65.1875	-63.875	-64.9375	-65.4062	-65.0625	-64.9375	-65.875	-67.5625	-66.7188	-66.6875	-66.6875	-65.0312	-65.3438	-66.3125	-66.0625	-67.875	-66.5938	-67.125	-68.2812
		0.46	1.5	-63.9375	-65.3438	-65.2188	-63.6562	-64.7812	-65.2188	-64.8438	-64.9062	-66	-67.4375	-66.6875	-66.625	-66.75	-64.8438	-65.2188	-66.2812	-66.0625	-67.6562	-66.5312	-66.9375	-68.125
		0.46	1.52	-63.4688	-65.2812	-65.2812	-63.375	-64.5312	-65.125	-64.6562	-64.4688	-65.9688	-67.3438	-66.6875	-66.625	-66.75	-64.5938	-65.0625	-66	-65.8125	-67.375	-66.3438	-66.6875	-67.9375
		0.46	1.54	-63	-65.0312	-65.0312	-62.9688	-64.2188	-64.7188	-64.4062	-64.0938	-65.5938	-67.1562	-66.7188	-66.4688	-66.5	-64.0625	-64.8125	-65.6562	-65.5312	-67.0312	-65.9062	-66.5	-67.625
		0.46	1.56	-62.2188	-64.6875	-64.6875	-62.625	-63.7812	-64.3438	-64.0312	-63.5625	-65.2812	-66.6562	-66.5938	-66.1562	-66.25	-63.5	-64.5312	-65.2188	-65.1562	-66.5	-65.4062	-66.0938	-67.1562
		0.46	1.58	-61.375	-64.1562	-64.3438	-62.1875	-63.1875	-63.75	-63.5312	-62.9688	-64.8438	-66.0625	-66.25	-65.6562	-66.0312	-62.6562	-64.0312	-64.7812	-64.5625	-65.6875	-64.8125	-65.6562	-66.4688
		0.46	1.6	-60.4688	-63.5	-63.8438	-61.7188	-62.4688	-63.125	-63	-62.125	-64.1562	-65.1875	-65.8438	-65.0312	-65.6562	-61.5938	-63.5625	-64.0938	-63.75	-64.9375	-64.0312	-65.375	-65.5312
		0.46	1.62	-59.4062	-62.75	-62.9062	-61.125	-61.5938	-62.2812	-62.1875	-61.25	-63.375	-64.2188	-65.1875	-64.2188	-65.0312	-60.4062	-62.9062	-63.3438	-63	-63.9062	-63.0938	-64.9062	-64.6562
		0.46	1.64	-58.25	-61.875	-62	-60.5312	-60.5312	-61.5	-61.4062	-60.3438	-62.5312	-63.3125	-64.5312	-63.375	-64.2812	-59.1875	-62.1875	-62.4688	-62.0312	-62.8125	-62.0938	-64.3125	-63.5625
		0.46	1.66	-57.0625	-60.9688	-61	-59.5938	-59.5625	-60.5	-60.5312	-59.3438	-61.4375	-62.1875	-63.75	-62.4375	-63.4375	-57.8125	-61.5312	-61.5625	-60.875	-61.7188	-60.9688	-63.75	-62.4688
		0.46	1.68	-55.9062	-60.0625	-60.0938	-58.8125	-58.3125	-59.5	-59.5312	-58.4688	-60.2812	-61.125	-62.8438	-61.4062	-62.4688	-56.5938	-60.625	-60.4375	-59.9062	-60.5312	-59.7188	-63	-61.4062
		0.46	1.7	-54.5625	-59.0312	-59.0312	-57.9375	-57.2188	-58.6562	-58.5	-57.5	-59.3438	-60.0938	-61.8125	-60.3125	-61.5	-55.4062	-59.9375	-59.3438	-58.8125	-59.4062	-58.5312	-62.1875	-60.1562
		0.46	1.72	-53.375	-58.125	-58.0625	-56.9375	-56.1562	-57.7188	-57.4688	-56.625	-58.3438	-59.0938	-60.9375	-59.375	-60.5625	-54.3438	-59.1562	-58.1562	-57.6562	-58.2812	-57.4062	-61.5312	-59
		0.46	1.74	-52.25	-57.2812	-57.1562	-56.0625	-55.0312	-56.8438	-56.4375	-55.6875	-57.4375	-58.1562	-60	-58.4375	-59.625	-53.4375	-58.4062	-56.9375	-56.6562	-57.3438	-56.3438	-60.75	-57.9688
		0.46	1.76	-51.125	-56.375	-56.2188	-55.1875	-53.9062	-56.0312	-55.5	-54.9688	-56.5625	-57.375	-59.1562	-57.4375	-58.8125	-52.625	-57.7188	-55.8125	-55.8125	-56.25	-55.4062	-59.9375	-56.9375
		0.46	1.78	-50.1562	-55.7188	-55.4375	-54.2812	-52.9688	-55.3438	-54.5312	-54.25	-55.875	-56.6562	-58.4062	-56.7188	-58	-51.8438	-57.0312	-54.875	-54.9062	-55.4688	-54.5625	-59.3125	-55.9688
		0.46	1.8	-49.3438	-54.9375	-54.6562	-53.5	-52.125	-54.6562	-53.75	-53.4688	-55.25	-55.9062	-57.6875	-56.0312	-57.3438	-51.25	-56.3125	-53.7812	-54	-54.6875	-53.75	-58.6875	-55.0625
		0.46	1.82	-48.4375	-54.3438	-53.875	-52.75	-51.25	-54.0938	-52.875	-52.8125	-54.6875	-55.2812	-57	-55.3438	-56.8438	-50.5625	-55.75	-52.9062	-53.4062	-54.0938	-53.0938	-58.0625	-54.2188
		0.46	1.84	-47.75	-53.875	-53.2812	-52.2188	-50.5312	-53.4688	-52.1562	-52.25	-54.2812	-54.7812	-56.5312	-54.8438	-56.3125	-50.0312	-55.2812	-52.2188	-52.6562	-53.6875	-52.5	-57.5625	-53.5312
		0.46	1.86	-47.0625	-53.3438	-52.7188	-51.5312	-49.9375	-53.0625	-51.5	-51.625	-53.7812	-54.2812	-56.0938	-54.3438	-55.75	-49.4375	-54.8438	-51.4375	-52.1562	-53.125	-51.9062	-57.0938	-52.9062
		0.46	1.88	-46.2188	-52.9375	-52.0938	-51	-49.3438	-52.5625	-51.0625	-51.125	-53.375	-53.7812	-55.6562	-54	-55.3438	-48.9062	-54.5	-50.75	-51.7188	-52.7812	-51.5625	-56.6562	-52.375
		0.46	1.9	-44.9688	-52.625	-51.6875	-50.625	-48.75	-52.1875	-50.5938	-50.7188	-53.1562	-53.4375	-55.3125	-53.625	-55	-48.5	-54.1875	-50.125	-51.2188	-52.5625	-51.2188	-56.375	-51.6562
		0.46	1.92	-42.7188	-52.3125	-51.3125	-50.1562	-48.3125	-51.9375	-50.25	-50.4062	-52.8438	-53.0938	-55.0625	-53.3438	-54.6875	-48.1562	-53.9062	-49.625	-50.875	-52.1875	-50.8438	-56.0625	-51.2812
		0.46	1.94	-39.1875	-52.0625	-50.875	-49.8125	-47.8438	-51.5938	-49.875	-50.125	-52.5312	-52.9375	-54.75	-53.0312	-54.4062	-47.375	-53.6875	-49.1562	-50.5625	-52.0625	-50.5625	-55.7812	-50.9688
		0.46	1.96	-34.3125	-51.875	-50.625	-49.375	-47.375	-51.2812	-49.5312	-49.8438	-52.375	-52.6562	-54.5	-52.9062	-54.25	-46.1562	-53.5312	-48.7188	-50.1875	-51.9375	-50.4062	-55.5312	-50.5312
		0.46	1.98	-27.625	-51.6875	-50.375	-49.0938	-46.5312	-51.125	-49.25	-49.5938	-52.1875	-52.4688	-54.375	-52.7188	-53.9688	-43.8438	-53.4062	-48.3438	-50.0312	-51.7188	-50.0938	-55.4375	-50.25
		0.46	2	-18.8125	-51.5625	-50.0312	-48.875	-44.875	-50.9062	-49.0312	-49.4375	-52.0312	-52.3438	-54.25	-52.5	-53.8125	-40.1562	-53.375	-47.7188	-49.6875	-51.625	-49.75	-55.2188	-49.9375
		0.46	2.02	-8.78125	-51.4688	-49.8125	-48.6875	-42.0312	-50.6562	-48.9062	-49.3125	-51.9688	-52.125	-54.0625	-52.375	-53.7188	-35.3125	-53.2812	-46.375	-49.4688	-51.5938	-49.1875	-55.0625	-49.375
		0.46	2.04	0.625	-51.2812	-49.5625	-48.5	-37.875	-50.5312	-48.5938	-49.1875	-51.8438	-52	-54.0312	-52.3438	-53.5625	-28.4688	-53.3125	-44.125	-49.2812	-51.5625	-47.9062	-55.1562	-48.375
		0.46	2.06	8.3125	-51.2188	-49.3438	-48.375	-32.3438	-50.4375	-48.4688	-49.0312	-51.7812	-51.9375	-53.875	-52.2188	-53.4688	-19.4062	-53.3125	-40.5312	-49.125	-51.5	-45.4062	-55.0625	-46.4375
		0.46	2.08	13.125	-51.0625	-49.1562	-48.0938	-24.9062	-50.2812	-48.375	-49	-51.6562	-51.8125	-53.8125	-52.0625	-53.4062	-9.25	-53.3438	-35.3438	-49	-51.5625	-41.875	-54.9688	-43.125
		0.46	2.1	14.5625	-51.125	-49.0625	-47.9375	-15.5	-50.2188	-48.2188	-48.875	-51.6562	-51.75	-53.8125	-52.125	-53.4062	0.375	-53.4688	-28.7188	-48.7812	-51.6562	-37.0938	-54.9688	-38.75
		0.46	2.12	13	-51.1562	-48.7812	-47.8125	-5.65625	-49.9688	-48.0625	-48.875	-51.5312	-51.6875	-53.6875	-52.125	-53.3438	8.03125	-53.4062	-19.8438	-48.7188	-51.625	-30.625	-54.9375	-32.8125
		0.46	2.14	8.65625	-51.0625	-48.6562	-47.6562	3.375	-49.9688	-47.9688	-48.8125	-51.625	-51.5312	-53.6875	-52.0312	-53.4375	12.6875	-53.4375	-9.59375	-48.5312	-51.6562	-22.0938	-55	-24.7812
		0.46	2.16	2.625	-51.1562	-48.5	-47.5	10.0312	-49.9375	-48	-48.8125	-51.625	-51.5	-53.6562	-52.0625	-53.2188	14.125	-53.5	0.0625	-48.4375	-51.75	-12.5	-55	-15.3438
		0.46	2.18	-4.40625	-51.0938	-48.2812	-47.4688	13.7812	-49.8125	-47.9375	-48.6562	-51.6562	-51.5	-53.6562	-52.0312	-53.1562	12.0625	-53.5625	7.6875	-48.2188	-51.8438	-3.21875	-55.1562	-5.8125
		0.46	2.2	-12.1562	-51.125	-48.3125	-47.2812	14.3125	-49.8125	-47.7812	-48.8438	-51.5625	-51.3438	-53.625	-51.9688	-53.1875	7.75	-53.5938	12.4062	-47.875	-52.0625	4.28125	-55.0938	2.21875
		0.46	2.22	-19.8438	-51.1875	-48.3125	-47.2188	11.75	-49.8438	-47.875	-48.8125	-51.6562	-51.3125	-53.5938	-52.0312	-53.0625	1.625	-53.6875	13.8125	-47.125	-52.125	9.03125	-55.1875	7.8125
		0.46	2.24	-27.0938	-51.2188	-48.1562	-47.1562	6.875	-49.7188	-47.9062	-48.8438	-51.625	-51.125	-53.5625	-51.9688	-53.0938	-5.71875	-53.6875	12	-45.4375	-52.1875	10.625	-55.3438	10.3125
		0.46	2.26	-33.4062	-51.2188	-48.1562	-47.0625	0.34375	-49.75	-47.8438	-48.9688	-51.6562	-51.0312	-53.5312	-51.9688	-53.2188	-13.375	-53.7812	7.5	-42.5	-52.3125	9.4375	-55.4062	10
		0.46	2.28	-39	-51.3438	-48.125	-47	-6.96875	-49.7812	-47.9062	-49	-51.7812	-51	-53.4688	-51.875	-53.1875	-21.0312	-53.8125	1.4375	-38.4062	-52.5	5.5625	-55.4375	6.875
		0.46	2.3	-43.6562	-51.25	-47.9688	-46.9375	-14.625	-49.5938	-47.9688	-49.0625	-51.8125	-51.0625	-53.4375	-51.9375	-53.1562	-28.0938	-53.8125	-5.75	-32.8438	-52.625	0.125	-55.5	1.8125
		0.46	2.32	-47.5938	-51.3438	-48	-46.8125	-22.3125	-49.6562	-47.9688	-49.25	-51.8438	-50.9688	-53.375	-52	-53.1875	-34.375	-53.8438	-13.5	-25.3438	-52.8125	-6.5	-55.5	-4.5625
		0.46	2.34	-50.7812	-51.2188	-47.875	-46.9375	-29.2812	-49.7812	-48.0312	-49.2188	-51.9688	-50.9062	-53.2812	-51.9062	-53.1875	-39.8125	-53.9375	-21.1562	-15.8438	-52.9375	-13.7188	-55.5625	-11.625
		0.46	2.36	-53.2812	-51.3438	-47.7812	-46.9062	-35.5	-49.75	-48.1562	-49.3438	-52.0938	-50.875	-53.3438	-51.9688	-53.1875	-44.4375	-53.9688	-28.0938	-5.875	-52.9688	-20.9688	-55.7188	-18.9062
		0.46	2.38	-55.3125	-51.375	-47.8438	-46.8438	-40.75	-49.8125	-48.25	-49.4375	-52	-50.8125	-53.25	-52.0312	-53.2812	-48.125	-54.0938	-34.4688	3.1875	-53.1562	-27.7188	-55.7812	-25.875
		0.46	2.4	-56.9688	-51.4375	-47.75	-46.9375	-45.0625	-49.8125	-48.3125	-49.5625	-52.0938	-50.8125	-53.25	-52.0625	-53.3125	-51.2812	-54.0312	-39.9062	9.78125	-53.3438	-33.8125	-55.8125	-32.125
		0.46	2.42	-58.1875	-51.3438	-47.7812	-46.875	-48.625	-49.7812	-48.3438	-49.7188	-52.1875	-50.9062	-53.375	-52.0938	-53.25	-53.7188	-54.0938	-44.375	13.2188	-53.375	-39.1875	-55.8438	-37.6875
		0.46	2.44	-59.2188	-51.4375	-47.7812	-46.9375	-51.7188	-49.9062	-48.5	-49.9062	-52.125	-50.875	-53.2812	-52.25	-53.3125	-55.625	-54.2188	-48.1875	13.375	-53.5	-43.8125	-55.9375	-42.5
		0.46	2.46	-59.9062	-51.4062	-47.6875	-46.9062	-54	-49.9688	-48.5625	-49.9375	-52.1562	-50.9375	-53.2812	-52.125	-53.4375	-57.1562	-54.2188	-51.2812	10.5	-53.6562	-47.6562	-56.0312	-46.5
		0.46	2.48	-60.5	-51.375	-47.7188	-46.9375	-55.8438	-49.9688	-48.6562	-50.0312	-52.3125	-50.9688	-53.2812	-52.2812	-53.4062	-58.2812	-54.25	-53.7812	5.3125	-53.7812	-50.8438	-56.0938	-49.75
		0.46	2.5	-60.875	-51.4375	-47.8125	-47.0312	-57.25	-50.1562	-48.75	-50.1562	-52.2812	-50.9062	-53.3438	-52.3438	-53.5312	-59.1875	-54.3438	-55.5938	-1.1875	-53.9062	-53.375	-56.25	-52.5625
		0.46	2.52	-61.0938	-51.3438	-47.8125	-47.0312	-58.4375	-50.1875	-48.8438	-50.3438	-52.2812	-50.9688	-53.3125	-52.2812	-53.5938	-59.9688	-54.4688	-57.2812	-8.59375	-54.0625	-55.5	-56.2812	-54.6562
		0.46	2.54	-61.4375	-51.3438	-47.9062	-47.125	-59.1875	-50.0938	-48.8438	-50.5	-52.2812	-51	-53.3438	-52.3125	-53.6562	-60.5	-54.5	-58.4688	-16.3125	-54.0938	-57.1562	-56.2188	-56.5
		0.46	2.56	-61.4375	-51.4375	-48.0312	-47.2812	-59.8438	-50.3125	-48.9688	-50.5625	-52.2188	-51.0625	-53.375	-52.4688	-53.7188	-60.9062	-54.6562	-59.375	-23.7188	-54.2188	-58.5625	-56.4062	-58.0312
		0.46	2.58	-61.5	-51.4062	-48.0312	-47.375	-60.375	-50.3438	-49.0312	-50.5938	-52.1875	-51.3125	-53.3438	-52.4062	-53.7812	-61.2188	-54.6875	-60.0938	-30.4688	-54.3438	-59.6875	-56.4688	-59.0938
		0.46	2.6	-61.5312	-51.4688	-48.125	-47.3125	-60.6562	-50.4062	-49.0938	-50.7812	-52.1562	-51.1875	-53.3438	-52.4688	-53.8125	-61.375	-54.7188	-60.7812	-36.5312	-54.4375	-60.5625	-56.4375	-60.0312
		0.46	2.62	-61.5625	-51.5	-48.1875	-47.4688	-60.8438	-50.5	-49.1562	-50.875	-52.25	-51.25	-53.4375	-52.4688	-53.8438	-61.5938	-54.8125	-61.1875	-41.5625	-54.5	-61.2812	-56.6562	-60.875
		0.46	2.64	-61.4688	-51.5	-48.3125	-47.5938	-61	-50.5312	-49.2188	-51	-52.1875	-51.3438	-53.4375	-52.5312	-54	-61.7812	-54.875	-61.4375	-45.7812	-54.625	-61.75	-56.7812	-61.4062
		0.46	2.66	-61.4375	-51.5938	-48.4688	-47.5938	-61	-50.5938	-49.3438	-51.125	-52.2188	-51.4375	-53.4375	-52.5625	-54.0625	-61.7812	-54.9688	-61.6875	-49.3125	-54.6562	-62.1562	-56.7812	-61.8438
		0.46	2.68	-61.375	-51.5938	-48.5	-47.7812	-61.0625	-50.7188	-49.3125	-51.125	-52.2188	-51.4375	-53.5312	-52.6562	-54.0312	-61.75	-54.9688	-61.8438	-52.2188	-54.7812	-62.4375	-56.875	-62.2188
		0.46	2.7	-61.2812	-51.6875	-48.5938	-47.8125	-61.125	-50.75	-49.4062	-51.1875	-52.25	-51.5938	-53.6562	-52.7812	-54.1875	-61.8438	-55.0938	-61.9375	-54.4062	-54.875	-62.6562	-56.9688	-62.5
		0.46	2.72	-61.2812	-51.7188	-48.75	-47.9375	-61.2188	-50.9062	-49.5	-51.3438	-52.2812	-51.75	-53.6562	-52.6875	-54.3125	-61.9062	-55.2188	-61.9688	-56.2812	-54.875	-62.875	-57.0312	-62.6875
		0.46	2.74	-61.1875	-51.875	-48.8125	-48.0312	-61.1562	-51.0312	-49.5938	-51.3125	-52.4375	-51.7812	-53.625	-52.8438	-54.3438	-61.875	-55.3125	-62.0625	-57.75	-54.9375	-62.9375	-57.1875	-62.9062
		0.46	2.76	-61.1875	-51.8438	-49	-48.0625	-61.0938	-51.0625	-49.6562	-51.3438	-52.375	-51.8125	-53.8125	-52.9375	-54.5	-61.75	-55.3438	-62.125	-58.7812	-55.1562	-63.0625	-57.3438	-62.9375
		0.46	2.78	-61.0625	-52.0312	-49.0312	-48.25	-61.0312	-51.1562	-49.6875	-51.375	-52.5	-51.9375	-53.8125	-53	-54.5312	-61.8125	-55.5	-62.0938	-59.7188	-55.1562	-63.125	-57.4062	-62.9688
		0.46	2.8	-61	-52.0312	-49.0938	-48.3438	-60.9688	-51.2812	-49.8125	-51.375	-52.5938	-51.9375	-53.8438	-53.0625	-54.5625	-61.8438	-55.5312	-62.0938	-60.375	-55.2188	-63.1875	-57.3125	-63.0938
		0.46	2.82	-60.9688	-52.0312	-49.3125	-48.5	-60.9062	-51.25	-49.875	-51.4062	-52.5938	-52.0938	-53.9375	-53.125	-54.6875	-61.75	-55.5625	-62.1875	-60.8438	-55.3125	-63.1562	-57.5	-63.1562
		0.46	2.84	-60.875	-52.1875	-49.375	-48.625	-60.9375	-51.2812	-50	-51.4062	-52.6562	-52.3125	-54	-53.2188	-54.7188	-61.75	-55.7188	-62	-61.1875	-55.375	-63.2812	-57.5312	-63.1562
		0.46	2.86	-60.8438	-52.1875	-49.4688	-48.6875	-60.7812	-51.4375	-50.0938	-51.4688	-52.6875	-52.2812	-53.9688	-53.1875	-54.8125	-61.6875	-55.7812	-62.0312	-61.5	-55.4062	-63.25	-57.5625	-63.125
		0.46	2.88	-60.75	-52.2188	-49.5938	-48.75	-60.75	-51.375	-50.1562	-51.5938	-52.8438	-52.375	-54.0312	-53.375	-54.9062	-61.6562	-55.8125	-62.0312	-61.6875	-55.5	-63.2188	-57.6562	-63.1875
		0.46	2.9	-60.7188	-52.4062	-49.5625	-48.9375	-60.7188	-51.4688	-50.1562	-51.5	-52.9375	-52.5312	-54.1562	-53.4062	-55	-61.625	-56.0312	-61.9375	-61.9062	-55.6562	-63.2812	-57.9062	-63.125
		0.46	2.92	-60.6875	-52.5625	-49.6875	-49	-60.75	-51.6562	-50.3438	-51.5938	-52.9062	-52.6562	-54.2188	-53.5	-55	-61.625	-55.9688	-62.0625	-62.0312	-55.5938	-63.1875	-57.9375	-63.0938
		0.46	2.94	-60.7188	-52.5312	-49.9375	-49.1875	-60.6562	-51.7812	-50.4062	-51.5938	-52.9375	-52.625	-54.3438	-53.5625	-55.0625	-61.6562	-56.0938	-62.0625	-62.0312	-55.75	-63.2812	-57.9688	-63.1562
		0.46	2.96	-60.625	-52.625	-49.9375	-49.2188	-60.625	-51.6562	-50.5	-51.5625	-53.0312	-52.75	-54.3438	-53.625	-55.1875	-61.6875	-56.1875	-62.0312	-61.9688	-55.9375	-63.2188	-58.0625	-63.2812
		0.46	2.98	-60.6875	-52.7188	-50.0938	-49.4062	-60.6562	-51.7812	-50.625	-51.6562	-53.125	-52.7812	-54.4375	-53.7812	-55.1875	-61.6562	-56.1875	-61.875	-62.0938	-55.8438	-63.25	-58	-63.1562
		0.46	3	-60.5938	-52.75	-50.2812	-49.5312	-60.5938	-51.7812	-50.6875	-51.7188	-53.2188	-52.8125	-54.5	-53.875	-55.25	-61.625	-56.3125	-61.9375	-62.0938	-55.9375	-63.2812	-58.0938	-63.25
		0.46	3.02	-60.5625	-52.8125	-50.3438	-49.6875	-60.5312	-51.9062	-50.8438	-51.7812	-53.25	-52.9688	-54.5	-54.0312	-55.3125	-61.7188	-56.4062	-62	-62.0312	-56.0938	-63.1562	-58.25	-63.25
		0.46	3.04	-60.5938	-52.8438	-50.5938	-49.6875	-60.5625	-52.125	-50.9375	-51.6875	-53.25	-53	-54.5938	-54.0625	-55.375	-61.6562	-56.4062	-61.9688	-62.0938	-56.1562	-63.1875	-58.3125	-63.2188
		0.46	3.06	-60.5312	-52.8438	-50.625	-49.8438	-60.5938	-52.0938	-51	-51.7812	-53.2812	-53.0312	-54.5625	-54.0312	-55.4375	-61.75	-56.5312	-61.9375	-62.0625	-56.1875	-63.25	-58.3438	-63.1875
		0.46	3.08	-60.5312	-53.0938	-50.7188	-49.9375	-60.5312	-52.0938	-51.1875	-51.8438	-53.4375	-53.2188	-54.7188	-54.1562	-55.5	-61.8125	-56.6562	-62	-62	-56.4062	-63.2812	-58.5	-63.2188
		0.46	3.1	-60.5938	-53.1562	-50.8125	-50.0312	-60.6562	-52.2812	-51.1875	-51.8125	-53.4688	-53.2188	-54.875	-54.375	-55.5312	-61.6875	-56.6875	-61.9688	-62.0312	-56.4062	-63.2188	-58.5312	-63.2188
		0.46	3.12	-60.5312	-53.1875	-50.9688	-50.2188	-60.625	-52.25	-51.3125	-52.0312	-53.5	-53.3125	-54.7812	-54.3438	-55.5625	-61.7812	-56.75	-61.9688	-62.0938	-56.5	-63.3125	-58.5938	-63.25
		0.46	3.14	-60.625	-53.4062	-51.0625	-50.3125	-60.625	-52.375	-51.4688	-52.0938	-53.6875	-53.375	-54.8125	-54.4688	-55.5312	-61.8438	-56.75	-61.9688	-62.0312	-56.5938	-63.375	-58.6562	-63.3125
		0.46	3.16	-60.625	-53.3438	-51.25	-50.375	-60.625	-52.4688	-51.5938	-52.0625	-53.6875	-53.5	-55.0312	-54.5625	-55.75	-61.75	-56.8125	-62.0625	-62.0312	-56.6875	-63.3125	-58.7812	-63.3125
		0.46	3.18	-60.625	-53.4688	-51.2812	-50.4375	-60.6875	-52.5312	-51.5625	-52.1875	-53.7188	-53.5938	-55	-54.6562	-55.8438	-61.9375	-57.0312	-62.0938	-62.0625	-56.7188	-63.4062	-58.7812	-63.2812
		0.46	3.2	-60.6875	-53.5625	-51.4688	-50.5938	-60.625	-52.5938	-51.6875	-52.1875	-53.7188	-53.6875	-55.0312	-54.7188	-55.9062	-61.9375	-56.9688	-62.0938	-61.9375	-56.8125	-63.4688	-58.875	-63.4062
		0.46	3.22	-60.6875	-53.6562	-51.5	-50.75	-60.625	-52.6875	-51.8438	-52.25	-53.8438	-53.7188	-55.0938	-54.7812	-56.0312	-61.9375	-57.0625	-62.1875	-61.9375	-56.9062	-63.4062	-58.9062	-63.375
		0.46	3.24	-60.7188	-53.6875	-51.625	-50.8438	-60.75	-52.8125	-51.9375	-52.3438	-53.875	-53.75	-55.1875	-54.7812	-56.0312	-61.9688	-57.25	-62.25	-62.0625	-56.875	-63.5	-59	-63.3125
		0.46	3.26	-60.8125	-53.7812	-51.7812	-50.875	-60.8125	-52.7812	-51.9688	-52.4062	-53.875	-53.9062	-55.2812	-54.7812	-56.0938	-62.0625	-57.1875	-62.2812	-62.0312	-57	-63.5	-59	-63.4062
		0.46	3.28	-60.8125	-53.8125	-51.7812	-51	-60.7812	-52.9688	-52.1875	-52.5	-54.0312	-54	-55.3125	-54.9062	-56.0938	-62.125	-57.2188	-62.2812	-62	-57.0938	-63.5312	-59	-63.5625
		0.46	3.3	-60.9062	-53.9062	-51.875	-51.1562	-60.9062	-52.9375	-52.1875	-52.5625	-54.0312	-54	-55.3438	-55.0312	-56.0938	-62.1875	-57.3438	-62.4375	-62.0625	-57.125	-63.5	-59.125	-63.5625
		0.46	3.32	-60.9688	-53.9062	-52.0312	-51.125	-60.9062	-53	-52.2812	-52.625	-54.0625	-54.2188	-55.3438	-55.1562	-56.1562	-62.3125	-57.375	-62.5	-62.1562	-57.2188	-63.5312	-59.1875	-63.5312
		0.46	3.34	-60.9062	-53.9688	-52.0625	-51.2188	-60.875	-53.1562	-52.4688	-52.6562	-54.125	-54.1875	-55.375	-55.2188	-56.25	-62.3125	-57.4062	-62.5312	-62.0938	-57.3125	-63.5938	-59.3438	-63.6875
		0.46	3.36	-61	-54.0312	-52.25	-51.3438	-60.9375	-53.1562	-52.5	-52.8438	-54.125	-54.2812	-55.5	-55.3438	-56.375	-62.3125	-57.4375	-62.5625	-62.1562	-57.375	-63.7188	-59.4062	-63.5938
		0.46	3.38	-61.0938	-54.125	-52.375	-51.4062	-61	-53.2188	-52.5	-52.8125	-54.1562	-54.4375	-55.4375	-55.4062	-56.3438	-62.4062	-57.5	-62.7188	-62.25	-57.4688	-63.6562	-59.3125	-63.625
		0.46	3.4	-61.0938	-54.1875	-52.3438	-51.5938	-61	-53.2812	-52.7188	-52.9062	-54.2188	-54.5	-55.5	-55.375	-56.4062	-62.4375	-57.625	-62.7188	-62.0938	-57.5312	-63.6875	-59.3438	-63.6875
		0.46	3.42	-61.1875	-54.25	-52.5	-51.6875	-61.0625	-53.3438	-52.7188	-52.9688	-54.3125	-54.5625	-55.5938	-55.4062	-56.5312	-62.5625	-57.625	-62.75	-62.1875	-57.5625	-63.8438	-59.4375	-63.75
		0.46	3.44	-61.1875	-54.4062	-52.6562	-51.75	-61.125	-53.4375	-52.7812	-53	-54.4375	-54.625	-55.6562	-55.5	-56.5	-62.6562	-57.5938	-62.8438	-62.2812	-57.5938	-63.8125	-59.4375	-63.6562
		0.46	3.46	-61.2188	-54.375	-52.625	-51.9062	-61.2188	-53.5625	-52.7812	-53.0312	-54.4688	-54.6562	-55.625	-55.5312	-56.5625	-62.7812	-57.6562	-62.8438	-62.2188	-57.7188	-63.8438	-59.5	-63.7812
		0.46	3.48	-61.3438	-54.4375	-52.7188	-51.9688	-61.1875	-53.5625	-52.875	-53.1562	-54.5625	-54.7812	-55.75	-55.625	-56.6875	-62.8125	-57.6562	-62.8125	-62.375	-57.7812	-64	-59.5625	-63.8125
		0.46	3.5	-61.4688	-54.5	-52.7812	-51.9688	-61.2812	-53.5625	-52.9688	-53.125	-54.6562	-54.9062	-55.8125	-55.625	-56.6562	-62.8125	-57.7188	-62.9375	-62.4062	-57.75	-64	-59.5938	-63.8438
		0.46	3.52	-61.4062	-54.5	-52.9062	-52.1562	-61.375	-53.7812	-53.0625	-53.2188	-54.5938	-54.9688	-55.75	-55.7812	-56.5938	-62.9062	-57.8125	-63.0938	-62.4688	-57.9375	-63.9375	-59.625	-63.8438
		0.46	3.54	-61.4375	-54.6562	-52.9688	-52.1562	-61.4688	-53.8125	-53.1875	-53.375	-54.7188	-55.0625	-55.7812	-55.7188	-56.7812	-62.9688	-57.875	-63.0938	-62.5625	-58	-64.0312	-59.7188	-64.0312
		0.46	3.56	-61.5	-54.6875	-52.9688	-52.1875	-61.375	-53.7812	-53.25	-53.3125	-54.8125	-55.1875	-55.8438	-55.8438	-56.8438	-62.9375	-57.875	-63.0938	-62.5	-58.0312	-64.0312	-59.8438	-63.9375
		0.46	3.58	-61.4688	-54.75	-53.0938	-52.2812	-61.5	-53.9688	-53.2812	-53.4062	-54.75	-55.1562	-55.9375	-55.9062	-56.7812	-63	-57.9688	-63.2188	-62.5	-58.0938	-64.0312	-59.7812	-64.0312
		0.46	3.6	-61.6562	-54.8438	-53.1562	-52.4375	-61.5625	-54.0625	-53.4688	-53.4688	-54.9062	-55.2812	-56.0312	-55.9375	-56.8438	-63.0938	-57.9062	-63.25	-62.625	-58.2188	-64.1875	-59.75	-64.0625
		0.46	3.62	-61.6562	-54.875	-53.2188	-52.5	-61.5312	-54.0312	-53.4688	-53.5	-54.9688	-55.2812	-56.0938	-56	-56.9375	-63.0938	-57.9375	-63.3125	-62.5938	-58.2188	-64.25	-59.7812	-64.1562
		0.46	3.64	-61.6875	-54.7812	-53.2812	-52.5625	-61.5625	-54.1562	-53.5	-53.6875	-54.9375	-55.3438	-56.0938	-56.0625	-57	-63.1875	-58.0938	-63.4062	-62.6562	-58.3125	-64.3438	-59.9062	-64.125
		0.46	3.66	-61.7812	-54.9375	-53.4062	-52.5938	-61.6875	-54.1562	-53.6562	-53.7812	-54.875	-55.4062	-56.1562	-56.0938	-57.0312	-63.25	-58.1562	-63.5	-62.7188	-58.4375	-64.25	-59.9062	-64.1875
		0.46	3.68	-61.75	-55.0312	-53.5	-52.7812	-61.7812	-54.1562	-53.625	-53.8125	-55.0312	-55.4688	-56.2188	-56.1562	-57	-63.3125	-58.2188	-63.5	-62.8438	-58.375	-64.375	-60.0312	-64.3438
		0.46	3.7	-61.8125	-54.9688	-53.625	-52.7812	-61.8125	-54.3125	-53.7188	-53.8438	-55.0625	-55.5	-56.2812	-56.2188	-57	-63.4062	-58.3125	-63.625	-62.9062	-58.375	-64.4375	-60	-64.2812
		0.46	3.72	-62.0312	-55.0938	-53.625	-52.8125	-61.9688	-54.4062	-53.8125	-54.0312	-55.0625	-55.5938	-56.1875	-56.3125	-57.0938	-63.4375	-58.3438	-63.5938	-62.8438	-58.5625	-64.4062	-60.0312	-64.4062
		0.46	3.74	-61.9062	-55.0938	-53.6562	-53.0312	-62	-54.4375	-53.9062	-53.9375	-55.1875	-55.6875	-56.2812	-56.3438	-57.1562	-63.4688	-58.4062	-63.6562	-62.9688	-58.5	-64.4688	-60.0625	-64.5
		0.46	3.76	-62	-55.0938	-53.75	-53	-61.9375	-54.4688	-53.9375	-54.125	-55.2188	-55.625	-56.3125	-56.3438	-57.2188	-63.5	-58.4062	-63.75	-63.0312	-58.625	-64.5625	-60.1562	-64.5625
		0.46	3.78	-62.0312	-55.125	-53.875	-53.0312	-62	-54.5	-54.0312	-54.1562	-55.1875	-55.75	-56.375	-56.3125	-57.1875	-63.5938	-58.4688	-63.7812	-63.0312	-58.6562	-64.5	-60.0938	-64.5938
		0.46	3.8	-62.0312	-55.1875	-53.8125	-53.2812	-62.0625	-54.4375	-54	-54.1562	-55.25	-55.7812	-56.4062	-56.4062	-57.2812	-63.6562	-58.5	-63.7812	-63.1875	-58.7188	-64.5	-60.1562	-64.6562
		0.46	3.82	-62.0938	-55.1562	-53.9375	-53.2188	-62.1875	-54.625	-54	-54.2188	-55.4062	-55.8438	-56.4688	-56.4375	-57.4375	-63.75	-58.5312	-63.875	-63.2188	-58.6875	-64.625	-60.1562	-64.7188
		0.46	3.84	-62.1562	-55.25	-53.9688	-53.2812	-62.1875	-54.7188	-54.1875	-54.3438	-55.4062	-55.875	-56.4688	-56.5312	-57.4062	-63.7812	-58.4688	-64.0312	-63.1562	-58.875	-64.5625	-60.2812	-64.6875
		0.46	3.86	-62.2188	-55.2812	-54.0625	-53.4375	-62.25	-54.625	-54.1875	-54.3125	-55.4688	-55.9375	-56.4375	-56.5312	-57.4375	-63.7188	-58.5938	-63.9062	-63.1562	-58.875	-64.7188	-60.2812	-64.75
		0.46	3.88	-62.3438	-55.3125	-54.0938	-53.5	-62.3438	-54.625	-54.375	-54.4375	-55.5312	-56.0312	-56.5625	-56.5625	-57.4688	-63.9062	-58.6562	-64.0312	-63.375	-58.7812	-64.75	-60.375	-64.8438
		0.46	3.9	-62.4062	-55.4375	-54.125	-53.5312	-62.3125	-54.75	-54.3438	-54.5312	-55.5	-56.0625	-56.625	-56.7188	-57.4688	-63.9375	-58.5938	-64.0625	-63.3125	-58.9062	-64.8125	-60.4062	-64.75
		0.46	3.92	-62.3438	-55.4062	-54.25	-53.625	-62.375	-54.7188	-54.5	-54.5625	-55.5312	-56.125	-56.5625	-56.75	-57.5	-63.9375	-58.625	-64.0312	-63.375	-59.0625	-64.8438	-60.375	-64.8438
		0.46	3.94	-62.5	-55.4375	-54.375	-53.5625	-62.5	-54.7188	-54.5	-54.5938	-55.5938	-56.0938	-56.6875	-56.75	-57.5938	-64.0312	-58.6875	-64.125	-63.4062	-59.0625	-64.9062	-60.4688	-65.0312
		0.46	3.96	-62.4375	-55.5	-54.3125	-53.6562	-62.5	-54.7812	-54.5	-54.6562	-55.5938	-56.1875	-56.75	-56.7812	-57.625	-64.0938	-58.6875	-64.2188	-63.5	-59.125	-64.9688	-60.5312	-65
		0.46	3.98	-62.4688	-55.5625	-54.4375	-53.8125	-62.5	-54.7812	-54.5938	-54.625	-55.6562	-56.1875	-56.7812	-56.875	-57.625	-64.0938	-58.7188	-64.2188	-63.5	-59.1875	-65.0312	-60.5	-64.9375
		0.46	4	-62.5625	-55.5312	-54.5312	-53.7812	-62.5625	-54.8438	-54.6562	-54.6875	-55.6875	-56.2812	-56.6875	-56.9062	-57.6562	-64.1875	-58.8125	-64.2812	-63.6562	-59.2188	-65.0938	-60.5625	-65.0312
		0.46	4.02	-62.625	-55.5938	-54.5312	-53.9375	-62.6562	-54.9062	-54.6875	-54.7812	-55.75	-56.2812	-56.7812	-56.9062	-57.6875	-64.0938	-58.8125	-64.3438	-63.75	-59.3125	-65.1875	-60.5625	-65.0938
		0.46	4.04	-62.6562	-55.6875	-54.5625	-53.9688	-62.5938	-54.9062	-54.75	-54.9062	-55.8438	-56.3125	-56.8438	-56.9688	-57.6562	-64.2812	-58.875	-64.375	-63.6875	-59.375	-65.2188	-60.5625	-65.0938
		0.46	4.06	-62.7812	-55.6875	-54.5938	-54.0312	-62.6875	-54.9375	-54.8438	-54.9688	-55.8125	-56.5	-56.9688	-57.125	-57.7812	-64.2812	-58.9375	-64.4688	-63.75	-59.3125	-65.1875	-60.5625	-65.1562
		0.46	4.08	-62.75	-55.625	-54.5938	-53.9688	-62.8125	-55.0312	-54.8438	-55	-55.8125	-56.5	-56.9688	-57.0312	-57.7812	-64.2812	-58.9688	-64.5312	-63.875	-59.3125	-65.2812	-60.5938	-65.3125
		0.46	4.1	-62.8125	-55.7188	-54.6562	-54.1875	-62.8125	-55.0312	-54.8438	-54.9062	-56	-56.5312	-57	-57	-57.75	-64.2812	-58.9375	-64.5	-63.875	-59.4062	-65.25	-60.6875	-65.3125
		0.46	4.12	-62.9062	-55.6875	-54.8438	-54.1562	-62.8125	-55	-54.9688	-55.1562	-55.9375	-56.4688	-56.9375	-57.2188	-57.7812	-64.4375	-59	-64.5	-64.0312	-59.4375	-65.3438	-60.625	-65.3438
		0.46	4.14	-62.9375	-55.7812	-54.8125	-54.3125	-62.875	-55.1562	-55	-55.1562	-56.0312	-56.6875	-56.9688	-57.2188	-57.8125	-64.375	-59	-64.625	-64.0312	-59.4375	-65.3438	-60.6875	-65.4062
		0.46	4.16	-62.9688	-55.8125	-54.9062	-54.2812	-62.9375	-55.1562	-55	-55.0312	-56.0312	-56.6875	-57.0625	-57.1875	-57.8438	-64.5	-59.0625	-64.6562	-64.125	-59.4375	-65.375	-60.8125	-65.4688
		0.46	4.18	-63.0312	-55.7188	-54.9375	-54.3438	-63	-55.1562	-55.0625	-55.2812	-56.125	-56.6562	-57.0938	-57.2188	-57.8125	-64.5312	-59.125	-64.75	-64.0312	-59.5	-65.4688	-60.7188	-65.5
		0.46	4.2	-63.0312	-55.8125	-54.9375	-54.4688	-63.0625	-55.25	-55.0625	-55.1562	-56.1562	-56.7812	-57.0625	-57.25	-57.9062	-64.5625	-58.9688	-64.75	-64.0312	-59.4062	-65.5312	-60.75	-65.5
		0.46	4.22	-63	-55.9062	-55	-54.5312	-63.125	-55.2812	-55.1562	-55.2812	-56.0938	-56.7188	-57.0938	-57.1562	-57.9062	-64.5625	-59.0312	-64.7812	-64.1875	-59.5625	-65.4688	-60.7812	-65.4688
		0.46	4.24	-63.2188	-55.875	-55	-54.5312	-63.125	-55.1875	-55.1875	-55.3438	-56.2188	-56.7188	-57.2188	-57.2188	-57.9062	-64.7188	-59.0938	-64.8125	-64.0938	-59.6562	-65.5625	-60.9375	-65.5
		0.46	4.26	-63.1875	-55.9375	-54.9688	-54.625	-63.2188	-55.3438	-55.1562	-55.4688	-56.125	-56.875	-57.1562	-57.3438	-57.9688	-64.6875	-59.0625	-64.8438	-64.1562	-59.6562	-65.5938	-60.8438	-65.5312
		0.46	4.28	-63.2812	-56.0312	-55.1875	-54.6562	-63.1875	-55.375	-55.375	-55.4375	-56.1875	-56.9062	-57.1562	-57.3438	-57.9688	-64.6875	-59.1562	-64.8438	-64.3438	-59.6875	-65.5312	-60.9375	-65.6562
		0.46	4.3	-63.2812	-55.9688	-55.1875	-54.5938	-63.2812	-55.4062	-55.3125	-55.4688	-56.3125	-56.9688	-57.2812	-57.3438	-57.9375	-64.7812	-59.1562	-64.9688	-64.2812	-59.8125	-65.6562	-60.9688	-65.6875
		0.46	4.32	-63.25	-56.0312	-55.1562	-54.6875	-63.2812	-55.4062	-55.375	-55.5	-56.3438	-56.9688	-57.2188	-57.3438	-58.0312	-64.8125	-59.1562	-64.9688	-64.3438	-59.7812	-65.6562	-61	-65.5625
		0.46	4.34	-63.375	-56.0938	-55.2188	-54.75	-63.3438	-55.4688	-55.5	-55.5	-56.2812	-57	-57.25	-57.3125	-58.0312	-64.8125	-59.3125	-65.0312	-64.4688	-59.7188	-65.75	-61	-65.625
		0.46	4.36	-63.4688	-56.0625	-55.2812	-54.8438	-63.4688	-55.4375	-55.4375	-55.5938	-56.4375	-56.9688	-57.3125	-57.4375	-58	-65.0312	-59.25	-65.0938	-64.5312	-59.8438	-65.8125	-61	-65.75
		0.46	4.38	-63.4062	-56.0312	-55.25	-54.9375	-63.4375	-55.5	-55.5938	-55.6562	-56.4688	-57.0312	-57.3125	-57.4062	-58.0312	-64.9375	-59.3125	-65.0938	-64.5	-59.8438	-65.8125	-61.0312	-65.75
		0.46	4.4	-63.5	-56.125	-55.4375	-55	-63.4062	-55.6562	-55.5	-55.625	-56.4688	-57.0625	-57.375	-57.5	-58.125	-65	-59.4375	-65.125	-64.5938	-59.9688	-65.8125	-61.0312	-65.75
		0.46	4.42	-63.5	-56.1562	-55.3438	-54.9375	-63.5	-55.625	-55.5312	-55.625	-56.4688	-57.125	-57.2812	-57.5	-58.0938	-65.0312	-59.4062	-65.25	-64.6562	-60	-66.0312	-61.0938	-65.9062
		0.46	4.44	-63.5	-56.125	-55.4688	-55	-63.5312	-55.6562	-55.625	-55.7188	-56.5312	-57.125	-57.4062	-57.4688	-58.0938	-65.0312	-59.4062	-65.2188	-64.7188	-60.0312	-65.9688	-61.0938	-65.8125
		0.46	4.46	-63.5625	-56.25	-55.5312	-55	-63.5312	-55.7188	-55.625	-55.6562	-56.5938	-57.1875	-57.4688	-57.5	-58.2188	-65.0312	-59.4062	-65.2812	-64.75	-60.0312	-66.0312	-61.1562	-65.875
		0.46	4.48	-63.625	-56.2188	-55.4688	-55.0625	-63.625	-55.6875	-55.625	-55.7812	-56.4688	-57.125	-57.4688	-57.5312	-58.2188	-65.1875	-59.4688	-65.2812	-64.8438	-60.0938	-66.0312	-61.125	-66.0312
		0.46	4.5	-63.5938	-56.2812	-55.5312	-55.0938	-63.6562	-55.6875	-55.6875	-55.9062	-56.625	-57.2188	-57.5	-57.5312	-58.0938	-65.1875	-59.4375	-65.2812	-64.875	-60.0938	-66.0625	-61.1875	-66.0312
		0.46	4.52	-63.6875	-56.2812	-55.6562	-55.0312	-63.6875	-55.75	-55.7188	-55.7812	-56.6875	-57.2812	-57.5625	-57.5938	-58.2188	-65.2188	-59.4688	-65.4062	-64.8438	-60.25	-66.0312	-61.2812	-66.0312
		0.46	4.54	-63.7188	-56.25	-55.5938	-55.0938	-63.6562	-55.8438	-55.8438	-55.8438	-56.5938	-57.3125	-57.5	-57.75	-58.25	-65.2188	-59.5	-65.4375	-64.9688	-60.125	-66.0938	-61.1875	-66.0312
		0.46	4.56	-63.75	-56.2812	-55.6875	-55.2188	-63.6875	-55.8125	-55.8125	-55.875	-56.75	-57.2812	-57.5	-57.625	-58.3438	-65.2188	-59.5	-65.4688	-65.0938	-60.2188	-66.1562	-61.25	-66.1562
		0.46	4.58	-63.8438	-56.3125	-55.8125	-55.25	-63.7812	-55.875	-55.7812	-55.875	-56.7812	-57.3438	-57.5938	-57.7188	-58.375	-65.2188	-59.5	-65.5	-65.0312	-60.2188	-66.1875	-61.2812	-66.1562
		0.46	4.6	-63.9062	-56.4062	-55.7812	-55.2812	-63.8438	-55.875	-55.8125	-55.9062	-56.75	-57.375	-57.5312	-57.8125	-58.4375	-65.4375	-59.4062	-65.5	-65.0938	-60.2812	-66.2188	-61.2812	-66.1562
		0.46	4.62	-63.875	-56.3438	-55.8125	-55.3438	-63.8438	-55.9375	-55.7812	-55.9688	-56.75	-57.4375	-57.5	-57.75	-58.375	-65.4062	-59.375	-65.5312	-65.2188	-60.2812	-66.1875	-61.3438	-66.2812
		0.46	4.64	-64.0312	-56.3438	-55.9375	-55.4062	-63.8125	-55.9688	-55.875	-55.9688	-56.7812	-57.4375	-57.5938	-57.7188	-58.3438	-65.4688	-59.5	-65.5625	-65.1562	-60.3438	-66.2812	-61.25	-66.3438
		0.46	4.66	-64.0312	-56.4062	-55.875	-55.4688	-63.9375	-55.9688	-56.0312	-56.0312	-56.9062	-57.5	-57.6562	-57.8125	-58.3438	-65.5312	-59.4688	-65.625	-65.25	-60.3438	-66.2812	-61.3438	-66.2812
		0.46	4.68	-63.9688	-56.3125	-55.9062	-55.5	-63.8438	-56.0625	-56.0312	-56.125	-56.9062	-57.5	-57.6562	-57.8438	-58.375	-65.5312	-59.375	-65.7188	-65.375	-60.4062	-66.375	-61.3438	-66.3438
		0.46	4.7	-64.0312	-56.3438	-55.9375	-55.4688	-64.0312	-56.0625	-56.0312	-56.1562	-56.8125	-57.5	-57.7188	-57.8438	-58.4062	-65.5625	-59.4375	-65.7188	-65.3438	-60.4688	-66.4375	-61.3438	-66.4375
		0.46	4.72	-64.0312	-56.4062	-55.9062	-55.5	-64.0625	-56.1875	-56	-56.0938	-56.8438	-57.5938	-57.7812	-57.8438	-58.4062	-65.5938	-59.4688	-65.75	-65.4062	-60.5	-66.3125	-61.3438	-66.4062
		0.46	4.74	-64.0625	-56.4375	-55.9375	-55.5938	-64.0312	-56.0938	-55.9688	-56.2812	-56.9375	-57.6875	-57.75	-57.9062	-58.5	-65.6562	-59.375	-65.8438	-65.4062	-60.5	-66.4062	-61.3438	-66.4062
		0.46	4.76	-64.125	-56.375	-56.0312	-55.5312	-64.0312	-56.1562	-56	-56.1875	-56.8438	-57.7188	-57.8125	-57.9688	-58.5	-65.5312	-59.4375	-65.8438	-65.375	-60.5312	-66.5312	-61.3438	-66.4688
		0.46	4.78	-64.0625	-56.4375	-55.875	-55.5625	-64.125	-56.1562	-56.0312	-56.2812	-56.9062	-57.75	-57.8125	-57.9688	-58.5	-65.5625	-59.25	-65.75	-65.375	-60.5625	-66.5312	-61.4375	-66.4688
		0.46	4.8	-64.0938	-56.5	-55.8438	-55.6875	-64.1562	-56.2188	-56.0938	-56.2812	-56.9375	-57.7812	-57.8125	-57.9688	-58.5938	-65.7812	-59.3438	-65.9688	-65.5312	-60.5	-66.5312	-61.4062	-66.5
		0.46	4.82	-64.1875	-56.5625	-55.8125	-55.5938	-64.0938	-56.1875	-56.1875	-56.2812	-57	-57.7188	-57.8125	-58.0625	-58.5938	-65.75	-59.4375	-65.9375	-65.5938	-60.5938	-66.5312	-61.4062	-66.625
		0.46	4.84	-64.1875	-56.5	-55.8125	-55.6875	-64.1875	-56.25	-56.125	-56.4062	-56.9375	-57.75	-57.8125	-58	-58.5938	-65.875	-59.4062	-65.9688	-65.5	-60.625	-66.5312	-61.4062	-66.7812
		0.46	4.86	-64.25	-56.5938	-55.9062	-55.7812	-64.3125	-56.375	-56.1875	-56.4375	-57.0625	-57.8438	-57.9688	-58.0938	-58.5	-66	-59.375	-65.9688	-65.5312	-60.6562	-66.6562	-61.4688	-66.6562
		0.46	4.88	-64.2812	-56.5312	-55.8438	-55.75	-64.1875	-56.3438	-56.2812	-56.4375	-57.125	-57.8438	-57.9062	-58.0312	-58.625	-65.7812	-59.3125	-65.9688	-65.6562	-60.5625	-66.7188	-61.5938	-66.5938
		0.46	4.9	-64.2812	-56.5938	-55.7812	-55.6875	-64.3125	-56.3125	-56.3125	-56.4375	-56.9688	-57.8438	-58.0312	-58.0625	-58.6562	-65.9062	-59.375	-66.0625	-65.625	-60.6875	-66.6875	-61.5	-66.6562
		0.46	4.92	-64.3125	-56.6562	-55.75	-55.8438	-64.4062	-56.4688	-56.3438	-56.4688	-57.0312	-57.9062	-58	-58.0625	-58.5625	-65.9062	-59.4375	-66.1562	-65.5938	-60.7188	-66.75	-61.5312	-66.6875
		0.46	4.94	-64.2812	-56.5938	-55.8125	-55.7812	-64.2812	-56.3438	-56.2812	-56.4375	-57.0938	-57.9062	-58.0938	-58.1875	-58.7188	-65.875	-59.3438	-66.1562	-65.7812	-60.6875	-66.7812	-61.5625	-66.75
		0.46	4.96	-64.4062	-56.5938	-55.75	-55.8438	-64.3125	-56.4375	-56.2812	-56.5312	-57.0938	-57.9375	-58.0312	-58.1875	-58.5938	-66	-59.4688	-66.125	-65.7812	-60.7812	-66.8438	-61.6562	-66.75
[truncated: 2,501 more rows]

## Sheet: panel B
		Lead of inhibition (ms)	Time re. contralateral shock (ms)	Vm (mV)	Vm (mV)	Vm (mV)	Vm (mV)	Vm (mV)	Vm (mV)	Vm (mV)	Vm (mV)	Vm (mV)	Vm (mV)	Vm (mV)	Vm (mV)	Vm (mV)	Vm (mV)	Vm (mV)	Vm (mV)	Vm (mV)	Vm (mV)	Vm (mV)	Vm (mV)	Vm (mV)	Vm (mV)	Vm (mV)	Vm (mV)	Vm (mV)	Vm (mV)	Vm (mV)	Vm (mV)	Vm (mV)	Vm (mV)	Vm (mV)	Vm (mV)	Vm (mV)	Vm (mV)	Vm (mV)	Vm (mV)	Vm (mV)	Vm (mV)	Vm (mV)	Vm (mV)
		-0.7	0	-60.9062	-60.7812	-60.8438	-60.9062	-61.0312	-61	-61.2188	-61.0312	-61	-61.2812	-61	-60.875	-61.1562	-60.9375
		-0.7	0.02	-61.3438	-61.1562	-61.25	-61.25	-62.4375	-62.3438	-62.5312	-62.25	-62.3438	-62.5625	-62.4375	-62.3125	-62.5625	-62.3125
		-0.7	0.04	-61.4688	-61.3125	-61.5	-61.4062	-61.25	-61.1562	-61.3438	-61.0625	-61.0938	-61.375	-61.0625	-61.0938	-61.2812	-61.0625
		-0.7	0.06	-56.5312	-56.25	-56.4375	-56.4688	-32.2812	-32.0625	-32.2812	-32.0312	-32.125	-32.4375	-32.0312	-32.0938	-32.2188	-32.0312
		-0.7	0.08	-43.4375	-43.2812	-43.4062	-43.4062	-0.09375	-0.0625	-0.09375	0.125	0.03125	-0.25	0.1875	0.125	-0.03125	0.15625
		-0.7	0.1	-45.9375	-45.7188	-45.8438	-45.875	-7.40625	-7.1875	-7.40625	-7.09375	-7.1875	-7.46875	-7.125	-7.0625	-7.28125	-7.125
		-0.7	0.12	-48.9688	-48.8125	-48.9688	-48.9375	-17.9688	-17.8438	-17.9688	-17.75	-17.75	-18	-17.6875	-17.7188	-17.8438	-17.6875
		-0.7	0.14	-51.7188	-51.4688	-51.6562	-51.6562	-27.6562	-27.6562	-27.6562	-27.5625	-27.5	-27.6875	-27.5	-27.5	-27.6562	-27.5
		-0.7	0.16	-53.8125	-53.5938	-53.75	-53.7812	-35.5938	-35.5312	-35.5938	-35.4375	-35.4062	-35.625	-35.4062	-35.4375	-35.5625	-35.375
		-0.7	0.18	-55.4375	-55.1875	-55.3125	-55.375	-41.5938	-41.5312	-41.6562	-41.5	-41.375	-41.5938	-41.4375	-41.375	-41.625	-41.3438
		-0.7	0.2	-56.5312	-56.2812	-56.4688	-56.4375	-45.9375	-45.875	-46.0938	-45.8125	-45.8125	-46	-45.8125	-45.8438	-45.9688	-45.7812
		-0.7	0.22	-57.1875	-56.9062	-57.0625	-57.0312	-49.0312	-48.8125	-49.1562	-48.8438	-48.8438	-49	-48.875	-48.875	-48.9375	-48.8125
		-0.7	0.24	-57.4375	-57.0938	-57.3438	-57.2812	-51.0312	-50.9688	-51.0938	-50.9688	-50.875	-51.0938	-50.9062	-51	-51.0625	-50.8438
		-0.7	0.26	-57.3438	-57.125	-57.3125	-57.25	-52.4062	-52.25	-52.5	-52.2188	-52.2188	-52.4375	-52.2812	-52.2812	-52.4062	-52.1875
		-0.7	0.28	-57.1875	-56.9062	-57.0938	-57.0938	-53.125	-53.0938	-53.3125	-53.0312	-52.9375	-53.2188	-53	-53.0312	-53.1875	-53
		-0.7	0.3	-56.8438	-56.5938	-56.8125	-56.6562	-53.5	-53.5	-53.6562	-53.3438	-53.375	-53.4688	-53.3438	-53.4375	-53.4688	-53.4062
		-0.7	0.32	-56.4688	-56.1562	-56.3438	-56.3125	-53.5938	-53.6562	-53.75	-53.4688	-53.4375	-53.625	-53.5312	-53.4688	-53.625	-53.4375
		-0.7	0.34	-55.8438	-55.5625	-55.7812	-55.7188	-53.5312	-53.4062	-53.6562	-53.4062	-53.25	-53.5312	-53.375	-53.3125	-53.5	-53.375
		-0.7	0.36	-55.3438	-55.0312	-55.25	-55.125	-53.25	-53.1875	-53.4062	-53.0938	-53.0312	-53.1875	-53.2188	-53.1562	-53.3125	-53.1875
		-0.7	0.38	-54.7188	-54.5	-54.625	-54.6562	-52.8125	-52.8438	-52.9688	-52.7188	-52.75	-52.8438	-52.75	-52.8125	-52.9688	-52.8125
		-0.7	0.4	-54.0312	-53.7812	-53.9688	-54	-52.4375	-52.5	-52.5312	-52.25	-52.3125	-52.375	-52.5	-52.375	-52.5	-52.375
		-0.7	0.42	-53.4688	-53.1875	-53.375	-53.375	-51.9375	-51.8438	-52.0312	-51.7812	-51.75	-51.9062	-51.9375	-51.9375	-52.0625	-51.7812
		-0.7	0.44	-52.875	-52.5625	-52.75	-52.75	-51.4375	-51.375	-51.5312	-51.2812	-51.25	-51.4688	-51.4062	-51.375	-51.5	-51.2188
		-0.7	0.46	-52.2188	-52.0312	-52.0625	-52.0938	-50.875	-50.9062	-51	-50.7812	-50.75	-50.875	-50.8125	-50.7188	-50.9062	-50.75
		-0.7	0.48	-51.5625	-51.375	-51.5625	-51.5	-50.2812	-50.2188	-50.375	-50.1875	-50.25	-50.3438	-50.3125	-50.2812	-50.3438	-50.2188
		-0.7	0.5	-51	-50.7188	-51	-50.9375	-49.625	-49.7188	-49.75	-49.5	-49.5625	-49.7188	-49.75	-49.5938	-49.7188	-49.5938
		-0.7	0.52	-50.4688	-50.1875	-50.4375	-50.4062	-49.0312	-48.9375	-49.0938	-48.9062	-48.875	-49.0938	-49.0938	-48.9688	-49	-49.0312
		-0.7	0.54	-49.8438	-49.5312	-49.8438	-49.8125	-48.3125	-47.9062	-48.2188	-48.1562	-48.2812	-48.4375	-48.2188	-48.125	-48.125	-48.2812
		-0.7	0.56	-49.2812	-48.9688	-49.2188	-49.2188	-47.2812	-46.4375	-46.75	-47.0938	-47.25	-47.625	-46.9062	-46.5938	-46.7812	-47.1875
		-0.7	0.58	-48.6875	-48.3125	-48.625	-48.5625	-45.5938	-43.9062	-44.5312	-45.3438	-45.75	-46.4062	-44.9062	-44.2812	-44.5625	-45.4688
		-0.7	0.6	-48.0312	-47.5	-48.0625	-47.9688	-43	-40.5312	-41.0938	-42.7812	-43.375	-44.4062	-42.0312	-41	-41.25	-42.8125
		-0.7	0.62	-46.9688	-46.25	-47.2812	-47.1875	-39.4688	-35.9688	-36.5625	-39.0938	-40.0312	-41.4062	-38.0938	-36.4062	-36.9062	-39.2188
		-0.7	0.64	-45.3438	-44.125	-46.125	-45.6875	-34.5312	-29.1562	-29.5625	-33.7812	-35.375	-37.3125	-32.4688	-29.6562	-30.5625	-34.0312
		-0.7	0.66	-42.6875	-40.9375	-44.125	-43.375	-27.1562	-19.5938	-19.9688	-25.9688	-28.5312	-31.3125	-24.0938	-19.8125	-21.25	-26.2812
		-0.7	0.68	-39	-36.5938	-41.2188	-40.0625	-17.2188	-9.1875	-9.0625	-15.5938	-18.9688	-22.5	-13.7188	-9.03125	-10.7812	-16.1562
		-0.7	0.7	-33.7188	-30.1875	-36.9688	-35.2812	-6.8125	-0.125	0.5	-5.28125	-8.78125	-12.0312	-3.84375	0.5	-1.25	-5.90625
		-0.7	0.72	-25.5938	-20.5938	-30.7188	-27.9688	1.875	6.28125	7.375	3.25	0.15625	-2.15625	3.875	7.3125	5.75	2.5625
		-0.7	0.74	-14.9688	-9.5	-21.3125	-17.6562	8	9.53125	11	8.75	6.5	5.34375	8.59375	11	9.625	8.0625
		-0.7	0.76	-4.15625	0.625	-10.25	-6.65625	10.5625	9.5625	11.125	11	9.65625	9.71875	10	11.0625	10.2188	10.4062
		-0.7	0.78	4.875	8.125	-0.0625	2.875	10	6.8125	8.0625	9.84375	9.6875	10.625	8.34375	8.125	7.75	9.4375
		-0.7	0.8	10.5938	12.375	7.625	9.65625	6.4375	1.875	2.65625	6	6.84375	8.59375	4.3125	2.78125	2.96875	5.71875
		-0.7	0.82	12.8125	12.8438	12	12.75	0.90625	-4.40625	-4.3125	0.125	2	4	-1.5	-3.96875	-3.4375	0
		-0.7	0.84	11.5312	10.125	12.7812	12.3438	-6.03125	-11.6875	-12.0938	-7.03125	-4.375	-2.25	-8.46875	-11.8125	-10.7812	-7.0625
		-0.7	0.86	7.375	4.96875	10.1875	8.78125	-13.5938	-19.1562	-19.9062	-14.9375	-11.5938	-9.5	-16.0312	-19.6875	-18.4375	-14.5938
		-0.7	0.88	1.125	-1.90625	5	3	-21.2812	-26.4688	-27.2812	-22.6562	-19	-17.2812	-23.2812	-27.1875	-25.9062	-22.3125
		-0.7	0.9	-6.3125	-9.78125	-1.75	-4.34375	-28.6562	-33	-33.9062	-29.7812	-26.2812	-24.75	-30.1562	-33.875	-32.5938	-29.4375
		-0.7	0.92	-14.4375	-17.7188	-9.53125	-12.3125	-35.1562	-38.6562	-39.5312	-36.1562	-32.6875	-31.6562	-36.2188	-39.8125	-38.5	-35.7812
		-0.7	0.94	-22.3125	-25.3125	-17.4688	-20.25	-40.7188	-43.4375	-44.2812	-41.6562	-38.375	-37.625	-41.375	-44.5938	-43.3438	-41.0625
		-0.7	0.96	-29.7188	-32.0938	-25.125	-27.6875	-45.2812	-47.2812	-48	-46	-43.0938	-42.6875	-45.5	-48.375	-47.375	-45.5625
		-0.7	0.98	-36.0938	-37.9688	-31.9688	-34.3438	-49	-50.4688	-50.9375	-49.5312	-46.9688	-46.7812	-48.9062	-51.4688	-50.5625	-49.0938
		-0.7	1	-41.5312	-42.8438	-37.875	-39.9062	-51.9375	-52.8125	-53.2812	-52.3438	-49.9688	-50.1562	-51.625	-53.8125	-53.0312	-51.875
		-0.7	1.02	-45.9375	-46.6875	-42.7188	-44.4688	-54.1562	-54.7188	-54.9062	-54.5312	-52.3438	-52.7812	-53.7188	-55.5625	-54.9062	-54.0625
		-0.7	1.04	-49.4062	-49.7188	-46.5625	-48.1562	-55.7812	-56.2188	-56.25	-56.2188	-54.1875	-54.7812	-55.2812	-56.9688	-56.4688	-55.7812
		-0.7	1.06	-52.0938	-52.1562	-49.6875	-50.8438	-57.1875	-57.2188	-57.2188	-57.5312	-55.5938	-56.4062	-56.5938	-57.9688	-57.5938	-56.9688
		-0.7	1.08	-54.2188	-53.875	-52.0312	-53.0625	-58.125	-58.1562	-57.9375	-58.4375	-56.6562	-57.5625	-57.5312	-58.6562	-58.4062	-58.0312
		-0.7	1.1	-55.8125	-55.1562	-53.7188	-54.7188	-58.9062	-58.6562	-58.4062	-59.0938	-57.4688	-58.5	-58.1562	-59.3125	-59.125	-58.6562
		-0.7	1.12	-57	-56.0625	-55	-55.9375	-59.4375	-59.1562	-58.6875	-59.625	-58.0938	-59.1875	-58.7188	-59.6562	-59.4688	-59.25
		-0.7	1.14	-57.9688	-56.6875	-55.9062	-56.6875	-59.9062	-59.4688	-58.9688	-59.875	-58.5625	-59.6875	-59.0312	-59.9688	-60	-59.6562
		-0.7	1.16	-58.5	-57.0938	-56.5938	-57.4688	-60.1875	-59.75	-59.0312	-60.1562	-58.9062	-60.1875	-59.2812	-60.1562	-60.3438	-59.9062
		-0.7	1.18	-59	-57.4375	-57.125	-57.8438	-60.5	-59.9375	-59.2188	-60.375	-59.0625	-60.4062	-59.5938	-60.3125	-60.5312	-60.125
		-0.7	1.2	-59.3438	-57.625	-57.4062	-58.0938	-60.6875	-60.0312	-59.25	-60.4688	-59.3438	-60.6875	-59.5938	-60.4062	-60.7812	-60.2812
		-0.7	1.22	-59.5	-57.6562	-57.5	-58.3125	-60.8438	-60.1875	-59.3125	-60.625	-59.5	-60.9062	-59.6875	-60.4375	-60.9062	-60.4375
		-0.7	1.24	-59.7812	-57.625	-57.5625	-58.4375	-61.0312	-60.2812	-59.3125	-60.6562	-59.6562	-61	-59.8438	-60.4688	-61.0625	-60.5
		-0.7	1.26	-59.75	-57.6562	-57.5625	-58.5	-61.2188	-60.3438	-59.3438	-60.6562	-59.75	-61.1875	-59.875	-60.4688	-61.1875	-60.6562
		-0.7	1.28	-59.875	-57.5312	-57.4688	-58.4375	-61.375	-60.4062	-59.3438	-60.6562	-59.9688	-61.2188	-60.0312	-60.4688	-61.2812	-60.6562
		-0.7	1.3	-60	-57.5	-57.4375	-58.4688	-61.5	-60.4688	-59.375	-60.6875	-60.0312	-61.4062	-60.0312	-60.5312	-61.4375	-60.7812
		-0.7	1.32	-60.0312	-57.5	-57.4062	-58.4062	-61.6562	-60.5312	-59.4062	-60.7188	-60.0938	-61.5312	-60.125	-60.5312	-61.5	-60.8438
		-0.7	1.34	-60.0938	-57.4375	-57.3438	-58.4688	-61.7812	-60.5625	-59.4375	-60.8125	-60.2188	-61.5938	-60.2188	-60.625	-61.5938	-60.875
		-0.7	1.36	-60.1562	-57.3125	-57.3438	-58.4062	-61.9688	-60.5625	-59.4062	-60.9062	-60.3125	-61.7188	-60.25	-60.7812	-61.7812	-60.9375
		-0.7	1.38	-60.1562	-57.2812	-57.3125	-58.4062	-62.2188	-60.6875	-59.5312	-60.875	-60.4375	-61.7812	-60.3438	-60.6875	-61.8438	-61
		-0.7	1.4	-60.2812	-57.25	-57.3125	-58.375	-62.3125	-60.7188	-59.5938	-60.9375	-60.5	-61.75	-60.4688	-60.8125	-61.9688	-61.0312
		-0.7	1.42	-60.1875	-57.2188	-57.25	-58.4062	-62.5	-60.75	-59.6562	-61	-60.5	-61.8438	-60.5312	-60.8438	-61.9375	-61.0625
		-0.7	1.44	-60.3125	-57.2188	-57.1562	-58.375	-62.5938	-60.9062	-59.8125	-61.0625	-60.5625	-61.875	-60.5938	-60.9062	-62	-61.2188
		-0.7	1.46	-60.3125	-57.2188	-57.1875	-58.3125	-62.7188	-60.875	-59.7188	-61.1562	-60.625	-61.9375	-60.6562	-60.9688	-62.1875	-61.25
		-0.7	1.48	-60.3438	-57.2812	-57.1562	-58.3438	-62.9062	-61.0312	-59.7812	-61.1562	-60.7188	-62.0625	-60.75	-61.0312	-62.2188	-61.3438
		-0.7	1.5	-60.3438	-57.2188	-57.25	-58.375	-63	-61.0625	-59.9688	-61.25	-60.7812	-62.0625	-60.8438	-61.0312	-62.375	-61.4375
		-0.7	1.52	-60.2812	-57.25	-57.2188	-58.3438	-63.0312	-61.0312	-59.9688	-61.2188	-60.8438	-62.0625	-60.9375	-61.2188	-62.4062	-61.5312
		-0.7	1.54	-60.4375	-57.2812	-57.0938	-58.3125	-63.25	-61.0938	-60.0312	-61.25	-60.9062	-62.1562	-61	-61.25	-62.4375	-61.5938
		-0.7	1.56	-60.4375	-57.1875	-57.1875	-58.3438	-63.25	-61.125	-60.0938	-61.2812	-60.9688	-62.3125	-61.0625	-61.25	-62.5	-61.75
		-0.7	1.58	-60.5	-57.2812	-57.2188	-58.3438	-63.4375	-61.25	-60.1875	-61.4062	-61	-62.3438	-61.125	-61.3438	-62.5938	-61.8438
		-0.7	1.6	-60.625	-57.2812	-57.1875	-58.375	-63.5	-61.25	-60.3125	-61.4688	-61.0312	-62.3125	-61.2188	-61.4062	-62.5312	-61.9062
		-0.7	1.62	-60.625	-57.375	-57.25	-58.5	-63.5312	-61.2812	-60.2812	-61.5312	-61.1562	-62.375	-61.25	-61.4688	-62.5938	-61.9375
		-0.7	1.64	-60.625	-57.3438	-57.2188	-58.5	-63.625	-61.4062	-60.2812	-61.5	-61.1562	-62.4062	-61.3438	-61.5312	-62.6562	-62.0625
		-0.7	1.66	-60.6562	-57.2812	-57.4062	-58.5938	-63.7188	-61.4688	-60.4062	-61.5625	-61.1875	-62.4062	-61.4062	-61.5938	-62.6875	-62.0938
		-0.7	1.68	-60.6875	-57.375	-57.3125	-58.5625	-63.7188	-61.5	-60.5	-61.6562	-61.2812	-62.4688	-61.4688	-61.5625	-62.6875	-62.125
		-0.7	1.7	-60.8438	-57.4375	-57.375	-58.6562	-63.8125	-61.5	-60.5	-61.6562	-61.3125	-62.4688	-61.4688	-61.6562	-62.7812	-62.2188
		-0.7	1.72	-60.8125	-57.5	-57.5	-58.5938	-63.9062	-61.5625	-60.625	-61.75	-61.3125	-62.5	-61.4688	-61.75	-62.8125	-62.1875
		-0.7	1.74	-60.7812	-57.5	-57.4688	-58.6875	-63.9688	-61.5938	-60.5938	-61.6562	-61.375	-62.625	-61.5	-61.7188	-62.875	-62.2812
		-0.7	1.76	-60.8438	-57.5312	-57.5312	-58.7188	-63.8438	-61.5938	-60.6562	-61.7188	-61.375	-62.5	-61.5	-61.875	-62.8438	-62.25
		-0.7	1.78	-60.875	-57.5312	-57.5625	-58.75	-64.0312	-61.6562	-60.75	-61.7812	-61.5	-62.6562	-61.5	-61.8125	-62.9375	-62.2812
		-0.7	1.8	-60.9062	-57.5625	-57.5625	-58.8125	-64.0312	-61.6875	-60.75	-61.8125	-61.5	-62.625	-61.5	-61.8438	-62.9688	-62.375
		-0.7	1.82	-60.9062	-57.5625	-57.6562	-58.8438	-64.0625	-61.6875	-60.8438	-61.9062	-61.625	-62.6562	-61.5625	-61.9375	-62.9375	-62.4688
		-0.7	1.84	-61	-57.6875	-57.6562	-58.875	-64.0312	-61.7188	-60.8438	-61.9062	-61.625	-62.7188	-61.6562	-61.9062	-62.9375	-62.4375
		-0.7	1.86	-60.9688	-57.6875	-57.6875	-58.9062	-64.0312	-61.7188	-60.8438	-61.8438	-61.6562	-62.7188	-61.6562	-62	-62.9062	-62.4688
		-0.7	1.88	-61	-57.75	-57.75	-58.9375	-64.1562	-61.75	-60.9375	-61.9062	-61.6875	-62.7188	-61.6875	-61.9688	-62.9375	-62.5312
		-0.7	1.9	-61	-57.8438	-57.8125	-58.9375	-64.0625	-61.8125	-60.9062	-61.8438	-61.6875	-62.7812	-61.6562	-61.9375	-63.0312	-62.5625
		-0.7	1.92	-61.0312	-57.8125	-57.8125	-59	-64.125	-61.8438	-60.9688	-61.8438	-61.7812	-62.8438	-61.7188	-62.0938	-63.0312	-62.5938
		-0.7	1.94	-61.0625	-57.8438	-57.8438	-59	-64.0625	-61.8438	-60.9375	-61.9688	-61.8438	-62.8125	-61.7812	-62.0625	-63.0938	-62.5938
		-0.7	1.96	-61.0625	-57.9688	-57.9688	-59.0625	-64.1562	-61.8438	-61.0312	-61.9062	-61.75	-62.8438	-61.75	-62	-63.0312	-62.6562
		-0.7	1.98	-61.0938	-58.0312	-57.9375	-59.125	-64.125	-61.8125	-61.0312	-61.9688	-61.8438	-62.8125	-61.7188	-62.0625	-63	-62.6562
		-0.7	2	-61.1562	-58.0312	-58.0625	-59.2188	-64.2188	-61.8125	-61.1875	-62	-61.9062	-62.7812	-61.7812	-62.125	-63.0625	-62.7188
		-0.7	2.02	-61.1562	-58.125	-58.0938	-59.2812	-64.1562	-61.9062	-61.125	-61.9375	-61.8438	-62.8438	-61.8125	-62.0938	-63	-62.6875
		-0.7	2.04	-61.125	-58.1562	-58.0625	-59.2812	-64.1562	-61.9688	-61.125	-61.9688	-61.9062	-62.8438	-61.8125	-62.0938	-63.0938	-62.75
		-0.7	2.06	-61.1875	-58.2188	-58.1562	-59.25	-64.1562	-61.8438	-61.125	-61.9375	-61.8125	-62.875	-61.8438	-62.1562	-63.0625	-62.6562
		-0.7	2.08	-61.2812	-58.2812	-58.2188	-59.25	-64.1562	-61.8438	-61.2188	-61.9688	-61.875	-62.8438	-61.9375	-62.0938	-63.0312	-62.6875
		-0.7	2.1	-61.3125	-58.2188	-58.2812	-59.3125	-64.0938	-61.9062	-61.25	-61.9688	-61.9062	-62.875	-61.875	-62.0312	-63.0312	-62.6875
		-0.7	2.12	-61.3438	-58.4062	-58.3438	-59.3125	-64.0938	-61.9375	-61.25	-61.9375	-61.9062	-62.9375	-61.9375	-62	-63	-62.75
		-0.7	2.14	-61.3125	-58.375	-58.3438	-59.375	-64.0625	-61.8438	-61.2812	-61.9688	-61.9375	-62.9062	-61.9688	-62.0625	-63.0312	-62.7812
		-0.7	2.16	-61.2812	-58.4062	-58.3438	-59.5	-64.0938	-61.8438	-61.3125	-61.9375	-61.9688	-62.9375	-61.9062	-62.0938	-63	-62.7188
		-0.7	2.18	-61.3438	-58.4375	-58.4688	-59.5	-64.0938	-61.8125	-61.25	-62.0625	-61.9375	-62.9375	-61.8125	-62.125	-63.0312	-62.6875
		-0.7	2.2	-61.3125	-58.4688	-58.5	-59.5	-64.0938	-61.875	-61.3438	-61.9375	-62	-62.9688	-61.875	-62.1562	-63	-62.7812
		-0.7	2.22	-61.3125	-58.5625	-58.5938	-59.4688	-64.0625	-61.8438	-61.375	-61.9688	-61.9375	-62.875	-61.9375	-62.25	-63	-62.75
		-0.7	2.24	-61.3438	-58.5	-58.5938	-59.5	-64.0312	-61.9375	-61.375	-61.9688	-61.9688	-62.9062	-61.875	-62.1562	-63	-62.75
		-0.7	2.26	-61.375	-58.625	-58.625	-59.5938	-64.125	-61.8438	-61.4062	-62	-62	-62.9062	-61.9062	-62.0938	-63.0625	-62.7188
		-0.7	2.28	-61.2812	-58.6562	-58.6562	-59.5625	-64.0312	-61.875	-61.4062	-61.8438	-61.9375	-62.9375	-61.9062	-62.0938	-63	-62.7812
		-0.7	2.3	-61.375	-58.6562	-58.7812	-59.625	-64.0312	-62	-61.4375	-61.9062	-61.9688	-62.9688	-61.875	-62.1562	-63	-62.8125
		-0.7	2.32	-61.3438	-58.75	-58.75	-59.6562	-64.0312	-61.9062	-61.4375	-61.9375	-62.0312	-62.9062	-61.9375	-62.125	-62.9688	-62.7812
		-0.7	2.34	-61.3438	-58.7812	-58.8125	-59.6562	-64.0312	-61.9062	-61.5	-61.9375	-62	-62.9375	-61.9062	-62.1562	-62.9688	-62.7812
		-0.7	2.36	-61.375	-58.9062	-58.7812	-59.6562	-64.0312	-61.9688	-61.5	-62.0312	-62.0625	-62.9062	-61.9062	-62.125	-62.9688	-62.8438
		-0.7	2.38	-61.3438	-58.9375	-58.875	-59.6562	-64.0312	-61.8438	-61.4062	-61.9688	-62	-63	-61.9375	-62.1562	-62.9062	-62.8125
		-0.7	2.4	-61.4688	-58.8438	-58.9375	-59.6875	-64.0312	-61.9062	-61.4375	-62.0625	-62.0938	-63	-61.9688	-62.2188	-62.9375	-62.8125
		-0.7	2.42	-61.375	-58.9375	-58.9375	-59.7812	-64.0312	-61.9688	-61.4062	-61.9688	-62.0625	-63	-62	-62.0625	-62.875	-62.8438
		-0.7	2.44	-61.4062	-58.9688	-59	-59.7188	-63.9375	-61.9688	-61.4375	-61.9688	-62.0938	-63	-61.9062	-62.0938	-62.9062	-62.75
		-0.7	2.46	-61.375	-58.9688	-59.0625	-59.75	-64.0312	-61.9375	-61.4688	-62	-62.0938	-62.9688	-61.9688	-62.0625	-62.875	-62.75
		-0.7	2.48	-61.4688	-59	-59.0938	-59.75	-63.875	-61.9375	-61.5	-61.9375	-62.125	-62.9375	-61.9688	-62.0938	-62.875	-62.7812
		-0.7	2.5	-61.4688	-59.0625	-59.1562	-59.7812	-63.875	-61.9062	-61.5	-61.9688	-62.125	-62.9688	-61.9062	-62.125	-62.8438	-62.6875
		-0.7	2.52	-61.4375	-59.1562	-59.0938	-59.8438	-63.9062	-61.9375	-61.5312	-62	-62.0938	-62.9688	-61.875	-62.0625	-62.875	-62.7188
		-0.7	2.54	-61.4375	-59.0938	-59.1875	-59.7812	-63.8438	-61.875	-61.5	-61.9375	-62.0625	-62.9375	-61.9688	-62.1562	-62.8438	-62.7812
		-0.7	2.56	-61.4375	-59.1562	-59.2188	-59.9062	-63.75	-61.9375	-61.5	-62	-62	-62.9688	-61.9375	-62	-62.8125	-62.7812
		-0.7	2.58	-61.4688	-59.125	-59.25	-59.875	-63.8438	-61.9062	-61.4688	-61.9375	-62.0625	-62.9375	-61.9375	-62	-62.8125	-62.7188
		-0.7	2.6	-61.4688	-59.1562	-59.3438	-59.9375	-63.7812	-61.875	-61.4688	-61.9688	-62.0625	-62.9688	-61.9375	-62.0625	-62.9375	-62.7812
		-0.7	2.62	-61.4062	-59.1875	-59.3438	-59.9375	-63.7812	-61.9062	-61.4062	-61.9688	-62.0625	-62.9375	-61.9688	-62.0312	-62.9062	-62.6875
		-0.7	2.64	-61.4688	-59.2188	-59.375	-59.9375	-63.6875	-61.8438	-61.4688	-61.9062	-62.0625	-62.9688	-61.875	-62	-62.8438	-62.75
		-0.7	2.66	-61.4375	-59.2812	-59.4688	-59.9688	-63.7188	-61.9375	-61.5	-61.9375	-62.0938	-62.8438	-61.8438	-62	-62.8125	-62.5938
		-0.7	2.68	-61.5312	-59.2812	-59.4375	-60	-63.7188	-61.8438	-61.5	-61.9688	-62.0938	-62.875	-61.8438	-62	-62.7812	-62.625
		-0.7	2.7	-61.5312	-59.3125	-59.4688	-59.9688	-63.7188	-61.8438	-61.5312	-61.875	-62.0938	-62.8438	-61.9062	-62	-62.7812	-62.6562
		-0.7	2.72	-61.625	-59.3125	-59.4688	-60	-63.6875	-61.8438	-61.4688	-61.875	-62.125	-62.8438	-61.9062	-61.9688	-62.8125	-62.6562
		-0.7	2.74	-61.5	-59.3438	-59.5	-60	-63.5625	-61.9062	-61.5	-61.9688	-62.0938	-62.8125	-61.9375	-61.9688	-62.7188	-62.6562
		-0.7	2.76	-61.4688	-59.4375	-59.5625	-60.0938	-63.5938	-61.8438	-61.5	-61.9375	-62.0312	-62.8438	-61.9688	-61.9375	-62.7188	-62.5625
		-0.7	2.78	-61.5	-59.5	-59.5	-60.1562	-63.5938	-61.8438	-61.5312	-61.9375	-62.0938	-62.75	-61.9062	-61.9688	-62.7188	-62.6875
		-0.7	2.8	-61.4688	-59.4688	-59.4688	-60.0938	-63.5625	-61.7188	-61.5625	-61.9375	-62.0312	-62.8438	-61.9375	-61.9688	-62.6875	-62.5625
		-0.7	2.82	-61.5	-59.5312	-59.5312	-60.0938	-63.5938	-61.7188	-61.6562	-61.8438	-62.0625	-62.8125	-61.9375	-61.875	-62.6875	-62.6875
		-0.7	2.84	-61.4688	-59.5	-59.5938	-60.1562	-63.625	-61.7188	-61.5938	-61.9062	-62.0312	-62.875	-61.9375	-61.9375	-62.7188	-62.6562
		-0.7	2.86	-61.5	-59.5	-59.6875	-60.1875	-63.5	-61.75	-61.5938	-61.8438	-62	-62.8125	-61.875	-61.9062	-62.6875	-62.625
		-0.7	2.88	-61.4688	-59.5312	-59.6562	-60.1562	-63.5	-61.7812	-61.5938	-61.9375	-62.0312	-62.75	-61.9062	-61.8125	-62.5625	-62.5312
		-0.7	2.9	-61.5312	-59.625	-59.6875	-60.1875	-63.5	-61.7812	-61.625	-61.875	-62.0938	-62.6875	-61.8438	-61.875	-62.5938	-62.5312
		-0.7	2.92	-61.5312	-59.5938	-59.75	-60.2812	-63.4375	-61.7188	-61.5312	-61.8125	-62.0625	-62.7812	-61.7812	-61.9688	-62.5938	-62.5312
		-0.7	2.94	-61.5312	-59.6562	-59.7188	-60.2812	-63.375	-61.7188	-61.5938	-61.875	-62.0312	-62.8125	-61.8438	-61.9062	-62.5	-62.5
		-0.7	2.96	-61.5	-59.625	-59.7188	-60.2812	-63.4688	-61.7188	-61.5625	-61.875	-62	-62.7812	-61.8125	-61.875	-62.5312	-62.4375
		-0.7	2.98	-61.5	-59.6875	-59.7812	-60.2812	-63.4375	-61.7188	-61.625	-61.875	-62.0312	-62.8438	-61.8125	-61.8438	-62.5625	-62.4062
		-0.7	3	-61.5312	-59.6875	-59.8438	-60.3125	-63.4375	-61.6562	-61.6562	-61.8438	-62.0625	-62.8125	-61.7812	-61.8125	-62.5625	-62.4062
		-0.7	3.02	-61.5	-59.6875	-59.8125	-60.3438	-63.375	-61.6875	-61.5	-61.875	-62.0312	-62.75	-61.875	-61.8438	-62.5625	-62.3438
		-0.7	3.04	-61.5938	-59.75	-59.875	-60.3438	-63.4375	-61.7188	-61.5312	-61.8438	-62	-62.7812	-61.875	-61.8438	-62.625	-62.3438
		-0.7	3.06	-61.5	-59.8125	-59.8438	-60.375	-63.3438	-61.7188	-61.5312	-61.75	-62.0312	-62.6562	-61.8438	-61.8438	-62.5625	-62.4062
		-0.7	3.08	-61.5	-59.8125	-59.9375	-60.375	-63.375	-61.6562	-61.5	-61.7812	-62	-62.5938	-61.7812	-61.8438	-62.5	-62.375
		-0.7	3.1	-61.4375	-59.8438	-59.9375	-60.4062	-63.375	-61.6875	-61.5312	-61.8125	-62	-62.5	-61.8438	-61.8125	-62.4688	-62.4062
		-0.7	3.12	-61.4375	-59.8125	-59.9375	-60.3438	-63.375	-61.6875	-61.5312	-61.8438	-62.0312	-62.5312	-61.7188	-61.7812	-62.4375	-62.4062
		-0.7	3.14	-61.4062	-59.8438	-59.9688	-60.4375	-63.2812	-61.6562	-61.5312	-61.8438	-61.9062	-62.625	-61.75	-61.875	-62.4062	-62.3438
		-0.7	3.16	-61.4375	-59.8438	-60.0312	-60.4062	-63.2812	-61.7188	-61.5312	-61.8438	-61.9688	-62.5938	-61.75	-61.8438	-62.4062	-62.375
		-0.7	3.18	-61.5	-59.875	-60	-60.375	-63.2188	-61.7188	-61.5312	-61.7812	-61.9375	-62.7188	-61.6562	-61.875	-62.4688	-62.3438
		-0.7	3.2	-61.5	-59.9375	-60.0312	-60.4375	-63.2812	-61.6562	-61.5938	-61.7812	-61.9688	-62.6875	-61.6875	-61.7812	-62.4062	-62.3125
		-0.7	3.22	-61.4375	-59.9375	-60.0938	-60.4062	-63.2812	-61.6562	-61.5625	-61.75	-61.875	-62.625	-61.75	-61.7188	-62.4062	-62.375
		-0.7	3.24	-61.4688	-59.9688	-60.2188	-60.4375	-63.2812	-61.5938	-61.4688	-61.8125	-61.9688	-62.5	-61.7812	-61.7188	-62.3125	-62.3438
		-0.7	3.26	-61.4375	-60	-60.125	-60.4688	-63.2188	-61.5938	-61.5938	-61.75	-61.8438	-62.4375	-61.7188	-61.8438	-62.375	-62.3438
		-0.7	3.28	-61.4688	-59.9375	-60.2188	-60.5	-63.25	-61.625	-61.5938	-61.7188	-61.8438	-62.5	-61.6875	-61.8438	-62.4062	-62.3125
		-0.7	3.3	-61.5	-60.0625	-60.25	-60.5	-63.1562	-61.5938	-61.5625	-61.7812	-61.7812	-62.5	-61.6875	-61.8438	-62.375	-62.3125
		-0.7	3.32	-61.4375	-60.0312	-60.2188	-60.5	-63.125	-61.5938	-61.5312	-61.75	-61.7188	-62.5312	-61.7188	-61.7812	-62.3125	-62.3125
		-0.7	3.34	-61.4688	-60.0625	-60.2188	-60.5	-63.0938	-61.5938	-61.5625	-61.7188	-61.8438	-62.5625	-61.6562	-61.8125	-62.4062	-62.25
		-0.7	3.36	-61.5312	-60.0625	-60.25	-60.4688	-63.1875	-61.625	-61.5312	-61.7188	-61.8125	-62.4688	-61.75	-61.7188	-62.375	-62.3438
		-0.7	3.38	-61.4688	-60.0625	-60.2188	-60.5312	-63.1562	-61.5938	-61.5312	-61.7812	-61.875	-62.5	-61.7812	-61.6562	-62.3125	-62.3438
		-0.7	3.4	-61.4688	-60	-60.25	-60.5	-63.1562	-61.5625	-61.625	-61.7812	-61.8438	-62.5	-61.8125	-61.8125	-62.2812	-62.2188
		-0.7	3.42	-61.4375	-60.0312	-60.2812	-60.5625	-63.0625	-61.5312	-61.7188	-61.75	-61.9375	-62.5	-61.7188	-61.7188	-62.2812	-62.2812
		-0.7	3.44	-61.4375	-60.1562	-60.2812	-60.5312	-63.0312	-61.5625	-61.7188	-61.6875	-61.8438	-62.4375	-61.7188	-61.6875	-62.375	-62.2812
		-0.7	3.46	-61.5312	-60.125	-60.3125	-60.5625	-63.0625	-61.5312	-61.7188	-61.7812	-61.8125	-62.5312	-61.6875	-61.6562	-62.2812	-62.2812
		-0.7	3.48	-61.4688	-60.125	-60.25	-60.5312	-62.9688	-61.5312	-61.6875	-61.6562	-61.9062	-62.5	-61.7188	-61.6875	-62.2812	-62.2812
		-0.7	3.5	-61.4688	-60.1562	-60.3125	-60.5312	-63	-61.5	-61.6875	-61.75	-61.8438	-62.5	-61.7188	-61.625	-62.4062	-62.2812
		-0.7	3.52	-61.4062	-60.125	-60.3125	-60.5312	-63.0312	-61.5625	-61.7188	-61.8438	-61.8125	-62.4688	-61.6562	-61.75	-62.2812	-62.25
		-0.7	3.54	-61.4062	-60.2188	-60.3438	-60.625	-62.9688	-61.5938	-61.8125	-61.75	-61.8125	-62.4688	-61.625	-61.6562	-62.1875	-62.2188
		-0.7	3.56	-61.4062	-60.1875	-60.4062	-60.6562	-62.875	-61.625	-61.7812	-61.6875	-61.8438	-62.3438	-61.5938	-61.625	-62.2812	-62.2188
		-0.7	3.58	-61.4375	-60.2188	-60.3438	-60.625	-62.9062	-61.5312	-61.7812	-61.7188	-61.7188	-62.4062	-61.625	-61.6875	-62.25	-62.1562
		-0.7	3.6	-61.4375	-60.25	-60.3438	-60.5938	-62.9688	-61.5	-61.7812	-61.75	-61.75	-62.4062	-61.5938	-61.5938	-62.2812	-62.1875
		-0.7	3.62	-61.375	-60.2188	-60.2812	-60.5	-62.875	-61.5938	-61.8125	-61.8438	-61.7812	-62.4062	-61.5625	-61.6562	-62.1875	-62.1875
		-0.7	3.64	-61.4062	-60.2188	-60.375	-60.5625	-62.875	-61.5938	-61.8125	-61.8438	-61.7188	-62.375	-61.5938	-61.625	-62.25	-62.1875
		-0.7	3.66	-61.4688	-60.2812	-60.375	-60.6875	-62.8125	-61.5312	-61.7812	-61.8125	-61.7188	-62.2812	-61.5938	-61.7188	-62.2812	-62.1562
		-0.7	3.68	-61.3438	-60.4062	-60.4062	-60.6562	-62.8438	-61.5625	-61.7812	-61.8125	-61.75	-62.2812	-61.5938	-61.6875	-62.2188	-62.1562
		-0.7	3.7	-61.4688	-60.3438	-60.4062	-60.6875	-62.8125	-61.5	-61.8125	-61.8438	-61.6875	-62.3438	-61.5938	-61.6875	-62.1875	-62.1562
		-0.7	3.72	-61.4375	-60.3438	-60.4375	-60.625	-62.8438	-61.5	-61.8125	-61.8438	-61.7188	-62.3125	-61.625	-61.6562	-62.2188	-62.1562
		-0.7	3.74	-61.4062	-60.3438	-60.5	-60.6562	-62.8125	-61.5625	-61.8438	-61.8125	-61.6875	-62.375	-61.5938	-61.6875	-62.2188	-62.1875
		-0.7	3.76	-61.4062	-60.3438	-60.4375	-60.5938	-62.7188	-61.5312	-61.8438	-61.7812	-61.6562	-62.3125	-61.5625	-61.625	-62.0312	-62.1875
		-0.7	3.78	-61.4375	-60.4062	-60.5312	-60.6562	-62.7188	-61.5938	-61.8125	-61.8438	-61.6875	-62.3438	-61.625	-61.6562	-62.1875	-62.1562
		-0.7	3.8	-61.4062	-60.3125	-60.5	-60.6562	-62.75	-61.5	-61.8125	-61.7812	-61.6562	-62.3438	-61.625	-61.625	-62.0938	-62.0938
		-0.7	3.82	-61.4688	-60.4062	-60.5312	-60.625	-62.7812	-61.5312	-61.8125	-61.9062	-61.6562	-62.2812	-61.5938	-61.625	-62.0312	-62.125
		-0.7	3.84	-61.3125	-60.375	-60.5938	-60.6875	-62.7812	-61.5	-61.7812	-61.75	-61.6875	-62.1875	-61.5625	-61.6562	-62.1562	-62.1562
		-0.7	3.86	-61.375	-60.4688	-60.5938	-60.6562	-62.8125	-61.5	-61.8125	-61.8438	-61.6562	-62.2812	-61.5	-61.5938	-62.125	-62.0938
		-0.7	3.88	-61.4062	-60.4375	-60.5312	-60.625	-62.8438	-61.5312	-61.8125	-61.8125	-61.5312	-62.1875	-61.5312	-61.5	-62.0625	-62.0625
		-0.7	3.9	-61.375	-60.4688	-60.5938	-60.6562	-62.75	-61.5625	-61.8125	-61.875	-61.625	-62.1875	-61.5	-61.5312	-62.125	-62.0312
		-0.7	3.92	-61.3438	-60.4375	-60.6562	-60.7188	-62.75	-61.5938	-61.8438	-61.8125	-61.6562	-62.1562	-61.5	-61.5	-62.0938	-62.0625
		-0.7	3.94	-61.4062	-60.5	-60.6875	-60.7812	-62.7188	-61.5312	-61.7812	-61.875	-61.625	-62.1875	-61.5312	-61.5625	-62.1875	-62.125
		-0.7	3.96	-61.375	-60.5	-60.6875	-60.75	-62.75	-61.5938	-61.7812	-61.875	-61.5625	-62.2812	-61.5	-61.5	-62.0938	-62.0625
		-0.7	3.98	-61.4062	-60.5	-60.75	-60.7812	-62.75	-61.5312	-61.7812	-61.875	-61.5625	-62.1875	-61.4688	-61.5625	-62.1875	-62.0312
		-0.7	4	-61.3125	-60.5	-60.7188	-60.7188	-62.75	-61.5	-61.6875	-61.7812	-61.5312	-62.125	-61.4688	-61.5312	-62.1562	-62.0938
		-0.7	4.02	-61.3438	-60.5	-60.75	-60.75	-62.75	-61.5	-61.7188	-61.8125	-61.5938	-62.1875	-61.4062	-61.4688	-62.1562	-62.0938
		-0.7	4.04	-61.4062	-60.5	-60.6875	-60.8125	-62.7188	-61.5	-61.8125	-61.7812	-61.5312	-62.1875	-61.5	-61.5	-62.125	-62
		-0.7	4.06	-61.3125	-60.4688	-60.7188	-60.7188	-62.6875	-61.4375	-61.7188	-61.7188	-61.5312	-62.1875	-61.4375	-61.4688	-62.0938	-62
		-0.7	4.08	-61.2812	-60.4688	-60.8125	-60.75	-62.5938	-61.5	-61.7188	-61.8125	-61.5938	-62.2188	-61.4688	-61.5	-62.0625	-62.0312
		-0.7	4.1	-61.3438	-60.5	-60.75	-60.7188	-62.6562	-61.5	-61.7812	-61.7188	-61.5938	-62.1562	-61.4062	-61.4688	-62	-62.0312
		-0.7	4.12	-61.4062	-60.5312	-60.7812	-60.8125	-62.6562	-61.5312	-61.75	-61.6875	-61.5938	-62.125	-61.4062	-61.5	-62.0625	-62
		-0.7	4.14	-61.25	-60.5625	-60.7812	-60.7188	-62.6562	-61.5	-61.7812	-61.75	-61.5	-62.0938	-61.4375	-61.4688	-62	-61.9375
		-0.7	4.16	-61.375	-60.5312	-60.75	-60.75	-62.6875	-61.4688	-61.7812	-61.7188	-61.5	-62.1562	-61.3438	-61.4375	-61.9688	-61.9375
		-0.7	4.18	-61.4062	-60.5	-60.7188	-60.875	-62.5625	-61.5312	-61.7188	-61.75	-61.5312	-62.0938	-61.375	-61.5	-61.9375	-61.875
		-0.7	4.2	-61.2812	-60.5625	-60.7188	-60.7812	-62.6875	-61.4375	-61.7188	-61.7812	-61.5625	-62.0938	-61.4375	-61.4688	-62.0312	-61.9688
		-0.7	4.22	-61.3438	-60.5312	-60.75	-60.875	-62.6562	-61.4375	-61.6875	-61.6875	-61.5625	-62.125	-61.4062	-61.4688	-62.0312	-61.9688
		-0.7	4.24	-61.3125	-60.5312	-60.8125	-60.8125	-62.6562	-61.4688	-61.75	-61.6875	-61.5312	-62.0625	-61.4375	-61.5	-61.9688	-61.9062
		-0.7	4.26	-61.3125	-60.6562	-60.7812	-60.8125	-62.6562	-61.4375	-61.7188	-61.7812	-61.5625	-62.0625	-61.4062	-61.5	-61.9688	-62
		-0.7	4.28	-61.2812	-60.5625	-60.75	-60.8438	-62.6562	-61.5	-61.7188	-61.8125	-61.5938	-62.0312	-61.4062	-61.4375	-62	-61.9688
		-0.7	4.3	-61.25	-60.625	-60.8125	-60.9062	-62.5938	-61.4688	-61.7812	-61.6875	-61.5	-62.0312	-61.375	-61.4688	-61.9375	-61.9062
		-0.7	4.32	-61.2188	-60.625	-60.6875	-60.9062	-62.5625	-61.4688	-61.6875	-61.6562	-61.5	-62	-61.375	-61.4688	-61.9688	-61.9062
		-0.7	4.34	-61.1875	-60.6562	-60.8438	-60.8438	-62.5938	-61.4688	-61.6875	-61.7188	-61.5	-62.0938	-61.4062	-61.4688	-61.9062	-61.8438
		-0.7	4.36	-61.2812	-60.5938	-60.7188	-60.8438	-62.5625	-61.4375	-61.6562	-61.7812	-61.5625	-62.0312	-61.375	-61.4062	-62	-61.8125
		-0.7	4.38	-61.25	-60.6875	-60.7812	-60.7812	-62.5938	-61.4688	-61.625	-61.7812	-61.5625	-62.0312	-61.4062	-61.3438	-61.9375	-61.9375
		-0.7	4.4	-61.2188	-60.6562	-60.8125	-60.9062	-62.5625	-61.4688	-61.7188	-61.8125	-61.5312	-62.0938	-61.4062	-61.4375	-61.9375	-61.8438
		-0.7	4.42	-61.2188	-60.6875	-60.7812	-60.9062	-62.5312	-61.4688	-61.6562	-61.7812	-61.5625	-62.0938	-61.375	-61.4062	-62	-61.8438
		-0.7	4.44	-61.2812	-60.6875	-60.8438	-60.8125	-62.5312	-61.375	-61.6562	-61.6875	-61.5312	-62.125	-61.375	-61.375	-61.9688	-61.8125
		-0.7	4.46	-61.3438	-60.625	-60.8438	-60.9688	-62.5312	-61.4688	-61.6562	-61.6875	-61.5625	-62.0312	-61.3438	-61.4688	-61.875	-61.8438
		-0.7	4.48	-61.25	-60.6875	-60.9062	-60.8125	-62.5312	-61.4062	-61.5938	-61.7188	-61.5312	-61.9688	-61.3438	-61.4062	-61.9062	-61.7812
		-0.7	4.5	-61.4062	-60.6562	-60.875	-60.8438	-62.5312	-61.5	-61.6875	-61.6875	-61.4688	-62	-61.375	-61.5	-62	-61.9062
		-0.7	4.52	-61.3438	-60.75	-60.9375	-60.875	-62.4688	-61.5312	-61.5938	-61.6562	-61.4375	-62	-61.3125	-61.5625	-61.8438	-61.8125
		-0.7	4.54	-61.2812	-60.7812	-60.875	-60.875	-62.5	-61.5	-61.6875	-61.5938	-61.5	-61.9062	-61.375	-61.4375	-61.8438	-61.9062
		-0.7	4.56	-61.3125	-60.75	-60.9688	-60.875	-62.4688	-61.5	-61.6562	-61.5938	-61.5	-61.9062	-61.25	-61.4375	-61.9062	-61.8438
		-0.7	4.58	-61.3438	-60.8125	-61	-60.9062	-62.4688	-61.4375	-61.6562	-61.625	-61.5	-61.9375	-61.4062	-61.4688	-61.9062	-61.875
		-0.7	4.6	-61.3125	-60.8438	-60.9688	-60.9062	-62.4375	-61.5	-61.6562	-61.6562	-61.5312	-61.875	-61.4062	-61.4062	-61.9062	-61.8125
		-0.7	4.62	-61.3438	-60.8438	-60.9688	-60.875	-62.4375	-61.4688	-61.6562	-61.6875	-61.5312	-61.875	-61.3125	-61.3438	-61.875	-61.7812
		-0.7	4.64	-61.3125	-60.9375	-61.0938	-60.8125	-62.4375	-61.4688	-61.6875	-61.6562	-61.5312	-61.875	-61.3125	-61.3125	-61.8125	-61.8438
		-0.7	4.66	-61.375	-60.8438	-60.8438	-60.8438	-62.3438	-61.4688	-61.6875	-61.6562	-61.4688	-61.875	-61.3438	-61.375	-61.9062	-61.7812
		-0.7	4.68	-61.3438	-60.8125	-61	-60.8438	-62.4062	-61.5625	-61.75	-61.625	-61.4688	-61.9062	-61.375	-61.3438	-61.875	-61.8125
		-0.7	4.7	-61.3438	-60.8438	-60.9062	-60.9688	-62.3125	-61.5312	-61.7188	-61.5938	-61.4062	-61.8438	-61.4375	-61.375	-61.8125	-61.8438
		-0.7	4.72	-61.375	-60.9062	-61	-60.9062	-62.3438	-61.4375	-61.7812	-61.6562	-61.3438	-61.875	-61.2812	-61.4062	-61.8438	-61.7812
		-0.7	4.74	-61.375	-60.8438	-61	-60.9688	-62.4062	-61.5312	-61.75	-61.5625	-61.4062	-61.8125	-61.25	-61.3438	-61.7812	-61.7812
		-0.7	4.76	-61.3438	-60.6562	-60.9375	-60.9375	-62.375	-61.5312	-61.7812	-61.5625	-61.4062	-61.9375	-61.2812	-61.375	-61.8438	-61.7812
		-0.7	4.78	-61.3125	-60.8438	-61.0312	-60.9062	-62.3125	-61.5	-61.75	-61.5625	-61.4062	-61.875	-61.25	-61.375	-61.7812	-61.75
		-0.7	4.8	-61.4375	-60.7812	-61	-60.9688	-62.2812	-61.5625	-61.7812	-61.5	-61.3438	-61.8125	-61.2812	-61.3438	-61.8438	-61.8125
		-0.7	4.82	-61.4375	-60.8438	-61.0938	-60.9688	-62.3125	-61.4688	-61.7812	-61.5312	-61.4062	-61.875	-61.2812	-61.375	-61.75	-61.7188
		-0.7	4.84	-61.3125	-60.8438	-61.0312	-60.9375	-62.2812	-61.5312	-61.8125	-61.625	-61.4062	-61.8125	-61.25	-61.375	-61.8125	-61.75
		-0.7	4.86	-61.4062	-60.8438	-61.0312	-60.9375	-62.3125	-61.5	-61.8438	-61.6562	-61.4062	-61.875	-61.3125	-61.4062	-61.75	-61.75
		-0.7	4.88	-61.4375	-60.9688	-61.0312	-60.9062	-62.2812	-61.4688	-61.8438	-61.6562	-61.4375	-61.9062	-61.2188	-61.375	-61.6875	-61.7188
		-0.7	4.9	-61.375	-60.9688	-61	-60.9062	-62.2812	-61.4375	-61.9062	-61.5938	-61.4062	-61.8125	-61.2188	-61.4375	-61.7812	-61.6875
		-0.7	4.92	-61.4062	-60.9688	-61.0312	-60.9688	-62.1562	-61.5	-61.9062	-61.5312	-61.375	-61.8438	-61.1562	-61.3438	-61.7812	-61.75
		-0.7	4.94	-61.4062	-61	-61.0312	-61	-62.1875	-61.5	-61.9062	-61.5625	-61.375	-61.875	-61.125	-61.375	-61.7812	-61.6875
		-0.7	4.96	-61.3125	-60.9375	-61.0625	-60.9375	-62.2812	-61.5	-62	-61.5625	-61.3125	-61.8438	-61.25	-61.3438	-61.7812	-61.6875
		-0.7	4.98	-61.3125	-60.9375	-61.0312	-61	-62.2188	-61.5	-61.875	-61.5	-61.375	-61.8125	-61.2188	-61.4062	-61.75	-61.6875
		-0.7	5	-61.3438	-60.9375	-61	-60.9688	-62.2188	-61.4688	-61.9375	-61.5	-61.3125	-61.875	-61.3438	-61.3438	-61.7812	-61.6562
		-0.6	0	-57.7812	-57.6875	-57.5312	-58.5	-58.5	-58.3438	-58.4688	-58.5938	-60	-59.9375	-59.7812	-59.8438	-59.9688	-60.7188	-60.8125	-60.8125	-60.8438	-61.0625	-61.0625	-60.9375	-61.1562	-60.875	-61.2812	-60.9375	-61.0625	-61.0938	-61.1562
		-0.6	0.02	-59.125	-59	-58.8438	-58.9375	-58.8438	-58.8125	-58.8125	-58.9375	-60.4688	-60.3438	-60.25	-60.1562	-60.3125	-61.0312	-61.1562	-61.25	-61.1562	-62.4688	-62.4062	-62.3438	-62.5	-62.1875	-62.5	-62.3438	-62.4688	-62.4688	-62.5
		-0.6	0.04	-58.0312	-57.8438	-57.6562	-59.0938	-58.9688	-58.9688	-58.9688	-59.0312	-60.625	-60.5	-60.4375	-60.375	-60.5	-61.2812	-61.4062	-61.4062	-61.375	-61.4062	-61.2812	-61.1875	-61.4375	-61.0938	-61.375	-61.0625	-61.25	-61.25	-61.2188
		-0.6	0.06	-29.1875	-28.9688	-28.8125	-54.2812	-54.0312	-53.9375	-54.0938	-54.1875	-55.8125	-55.8125	-55.6562	-55.5938	-55.75	-56.25	-56.375	-56.3438	-56.3125	-32.75	-32.6875	-32.5	-32.6562	-32.2812	-32.3438	-32.0312	-32.25	-32.1875	-32.25
		-0.6	0.08	2.8125	3.09375	3.28125	-41.7812	-41.6562	-41.5	-41.5	-41.7188	-43.5625	-43.375	-43.2812	-43.3125	-43.4688	-43.0938	-43.25	-43.2188	-43.2812	-0.84375	-0.71875	-0.65625	-0.625	-0.21875	-0.1875	0.09375	0	0	-0.09375
		-0.6	0.1	-4.53125	-4.1875	-4.03125	-43.8125	-43.6562	-43.6562	-43.5625	-43.8125	-45.6562	-45.4375	-45.4062	-45.3125	-45.5	-45.6875	-45.75	-45.7812	-45.6875	-7.84375	-7.75	-7.65625	-7.65625	-7.21875	-7.40625	-7.1875	-7.28125	-7.3125	-7.34375
		-0.6	0.12	-15.0938	-14.6875	-14.6562	-46.7812	-46.7188	-46.5312	-46.5	-46.6562	-48.4375	-48.25	-48.125	-48.1875	-48.2812	-48.8438	-48.9062	-48.9375	-48.8125	-18.1875	-18.1562	-17.9688	-18.0938	-17.8125	-18.1562	-17.875	-17.9375	-18.0312	-17.9062
		-0.6	0.14	-24.7812	-24.5	-24.4062	-49.5	-49.25	-49.1562	-49.25	-49.2812	-51.0312	-50.7812	-50.6875	-50.7188	-50.7812	-51.6562	-51.75	-51.625	-51.6562	-27.7812	-27.7812	-27.5312	-27.75	-27.4688	-27.9375	-27.7188	-27.7812	-27.7812	-27.7188
		-0.6	0.16	-32.5625	-32.375	-32.2812	-51.6562	-51.4688	-51.4375	-51.4062	-51.5312	-53.1562	-52.9062	-52.9062	-52.8438	-53.0312	-53.9375	-53.9688	-54	-53.9688	-35.5938	-35.375	-35.3125	-35.4688	-35.3125	-35.7812	-35.6562	-35.6562	-35.6875	-35.5312
		-0.6	0.18	-38.4688	-38.3125	-38.1875	-53.3438	-53.0938	-53.1562	-53.125	-53.1562	-54.8438	-54.5312	-54.5312	-54.4375	-54.5312	-55.625	-55.6875	-55.7812	-55.625	-41.5312	-41.4062	-41.25	-41.4688	-41.2812	-41.7812	-41.5938	-41.75	-41.625	-41.5625
		-0.6	0.2	-42.9688	-42.6875	-42.5312	-54.6562	-54.375	-54.3125	-54.3125	-54.4375	-56.0938	-55.7812	-55.75	-55.7812	-55.875	-56.875	-56.9688	-57	-56.9062	-45.9688	-45.7188	-45.625	-45.8125	-45.75	-46.1875	-45.9688	-46.0938	-46.0938	-46
		-0.6	0.22	-46.0312	-45.8125	-45.6875	-55.375	-55.1875	-55.125	-55.1875	-55.25	-56.875	-56.5625	-56.5312	-56.5938	-56.6562	-57.6875	-57.7188	-57.8125	-57.7188	-49.0938	-49	-48.8438	-49.0625	-48.9062	-49.3438	-49.125	-49.2188	-49.3125	-49.1875
		-0.6	0.24	-48.2812	-48.125	-48.0312	-56	-55.7188	-55.7188	-55.625	-55.8438	-57.4062	-57.1875	-57.125	-57.0312	-57.1875	-58.2188	-58.2812	-58.3125	-58.2812	-51.4375	-51.3438	-51.1562	-51.4375	-51.2812	-51.7188	-51.4375	-51.5625	-51.6875	-51.4375
		-0.6	0.26	-50.1562	-50	-49.7812	-56.3438	-56.0938	-56.125	-56.0625	-56.2188	-57.6562	-57.5	-57.375	-57.4375	-57.5312	-58.5625	-58.625	-58.5938	-58.6875	-53.1562	-53.1875	-52.9375	-53.2188	-53.0625	-53.4688	-53.3125	-53.4375	-53.4688	-53.3438
		-0.6	0.28	-51.4375	-51.3125	-51.1562	-56.5	-56.3438	-56.2812	-56.3125	-56.375	-57.8438	-57.6562	-57.5938	-57.5625	-57.6562	-58.7812	-58.8438	-58.9375	-58.9062	-54.5312	-54.4062	-54.2812	-54.5938	-54.3438	-54.7812	-54.5938	-54.75	-54.75	-54.6562
		-0.6	0.3	-52.3438	-52.1875	-52.0625	-56.5625	-56.3125	-56.2812	-56.3438	-56.4375	-57.875	-57.5625	-57.5	-57.4688	-57.625	-59	-58.9375	-59	-58.9688	-55.4062	-55.3438	-55.1875	-55.5	-55.3438	-55.7188	-55.5	-55.625	-55.6875	-55.7188
		-0.6	0.32	-52.9062	-52.6562	-52.6562	-56.3438	-56.25	-56.1875	-56.2188	-56.2812	-57.625	-57.4375	-57.3438	-57.375	-57.5312	-58.8125	-58.8438	-58.9062	-58.875	-56.0625	-55.875	-55.625	-55.9688	-55.9062	-56.4062	-56.0938	-56.3438	-56.25	-56.2812
		-0.6	0.34	-53.25	-53	-52.875	-56.2188	-55.875	-55.9062	-55.9375	-56	-57.3438	-57.1875	-56.9375	-57.0625	-57.1562	-58.5625	-58.5938	-58.7188	-58.6875	-56.3125	-56.1562	-55.9688	-56.3125	-56.1562	-56.6562	-56.4375	-56.4688	-56.5938	-56.5625
		-0.6	0.36	-53.3125	-53.0938	-52.9688	-55.7188	-55.5625	-55.5625	-55.5938	-55.6562	-56.8438	-56.8438	-56.5625	-56.5938	-56.7812	-58.3125	-58.3125	-58.3438	-58.3125	-56.3125	-56.1875	-56	-56.3438	-56.2812	-56.6562	-56.5	-56.5312	-56.625	-56.5938
		-0.6	0.38	-53.0938	-52.9688	-52.7812	-55.3125	-55.2188	-55	-55.2188	-55.1562	-56.5	-56.3125	-56.2188	-56.1562	-56.2812	-57.9062	-57.8125	-57.9062	-57.875	-56.2188	-56.0938	-55.8438	-56.125	-56.0938	-56.5938	-56.4375	-56.4688	-56.5	-56.4062
		-0.6	0.4	-52.8125	-52.6562	-52.5312	-54.8125	-54.5938	-54.5625	-54.625	-54.75	-55.875	-55.7188	-55.5938	-55.5938	-55.6875	-57.3438	-57.375	-57.375	-57.3438	-55.8438	-55.75	-55.5625	-55.8125	-55.8438	-56.3438	-56.0625	-56.1562	-56.2188	-56.0312
		-0.6	0.42	-52.4688	-52.2812	-52.1875	-54.2188	-54.0625	-53.9375	-54.0625	-54.0938	-55.375	-55.0938	-55	-55	-55.0312	-56.7812	-56.8125	-56.75	-56.6875	-55.5625	-55.375	-55.1875	-55.5	-55.4375	-55.9688	-55.7188	-55.8125	-55.7812	-55.75
		-0.6	0.44	-51.9688	-51.8125	-51.6562	-53.6562	-53.5	-53.375	-53.4688	-53.4688	-54.6875	-54.5625	-54.3438	-54.4688	-54.5	-56.1562	-56.1875	-56.1562	-56.1562	-55.0312	-54.9688	-54.6875	-55	-54.9375	-55.4688	-55.2812	-55.375	-55.4062	-55.375
		-0.6	0.46	-51.5	-51.2812	-51.25	-53.0625	-52.9688	-52.8125	-52.75	-52.9375	-54.0625	-53.8438	-53.6875	-53.9062	-53.9375	-55.5	-55.5	-55.5	-55.5	-54.5312	-54.4688	-54.25	-54.5938	-54.5	-55	-54.7812	-54.8438	-54.9375	-54.875
		-0.6	0.48	-51	-50.75	-50.6875	-52.4375	-52.25	-52.1875	-52.2188	-52.2812	-53.5312	-53.3125	-53.0938	-53.2188	-53.3125	-54.875	-54.8438	-54.7812	-54.9375	-54	-53.875	-53.625	-54.0938	-53.9375	-54.375	-54.1562	-54.3125	-54.4062	-54.3125
		-0.6	0.5	-50.4375	-50.1562	-50.125	-51.7812	-51.6875	-51.5625	-51.625	-51.6875	-52.8125	-52.5938	-52.5	-52.5938	-52.7188	-54.2188	-54.2188	-54.25	-54.3125	-53.375	-53.3125	-53.0312	-53.4062	-53.375	-53.7812	-53.6562	-53.6562	-53.8125	-53.6562
		-0.6	0.52	-49.875	-49.5625	-49.5	-51.1562	-51	-50.9062	-50.9688	-51	-52.2812	-52	-51.8438	-52.0312	-52.0625	-53.6562	-53.5	-53.5312	-53.5625	-52.875	-52.6875	-52.4375	-52.75	-52.7188	-53.2188	-53.0312	-53.0938	-53.2812	-53.0938
		-0.6	0.54	-49.3125	-48.9375	-49	-50.5625	-50.4375	-50.4062	-50.3125	-50.5312	-51.6875	-51.4062	-51.25	-51.375	-51.5	-53	-52.875	-52.9688	-52.9062	-52.2812	-52.125	-51.8438	-52.3125	-52.125	-52.6562	-52.4062	-52.5	-52.75	-52.5
		-0.6	0.56	-48.7812	-48.375	-48.5	-50.125	-49.7812	-49.75	-49.7812	-49.875	-51.0625	-50.875	-50.6562	-50.75	-50.8438	-52.4062	-52.2812	-52.4062	-52.3438	-51.5312	-51.5938	-51.1875	-51.7812	-51.5312	-52.1562	-51.9688	-51.9062	-52.1562	-52.0312
		-0.6	0.58	-48.2812	-47.8438	-47.9688	-49.4375	-49.25	-49.2188	-49.125	-49.3438	-50.4688	-50.3125	-50.0938	-50.1562	-50.2812	-51.8125	-51.625	-51.6562	-51.75	-51.0938	-51.0625	-50.625	-51.1875	-51	-51.625	-51.4375	-51.4062	-51.75	-51.5
		-0.6	0.6	-47.7812	-47.3438	-47.5	-48.9062	-48.7188	-48.6562	-48.5938	-48.8438	-50.0312	-49.7812	-49.5625	-49.5312	-49.75	-51.2188	-51.0625	-51.0938	-51.1875	-50.6875	-50.5	-50.0938	-50.7812	-50.3438	-51.1875	-50.9688	-50.9062	-51.4062	-51.0312
		-0.6	0.62	-47.3438	-46.8438	-47.1875	-48.4688	-48.2812	-48.0938	-48.0938	-48.2812	-49.5312	-49.25	-49.0625	-49.0938	-49.25	-50.7188	-50.5312	-50.5312	-50.5625	-50.2812	-50.0938	-49.5312	-50.3438	-49.7812	-50.8125	-50.5625	-50.4375	-51	-50.75
		-0.6	0.64	-46.9375	-46.4375	-46.8125	-47.8125	-47.625	-47.5938	-47.5	-47.7188	-48.9688	-48.8125	-48.5938	-48.6562	-48.6562	-50.125	-49.875	-49.9375	-50	-49.9375	-49.7188	-49.125	-49.875	-49.3125	-50.5	-50.3438	-50.0938	-50.75	-50.375
		-0.6	0.66	-46.6562	-46.1562	-46.4688	-47.3438	-47.1875	-47	-46.9688	-47.2188	-48.5	-48.3438	-48.125	-48.1875	-48.1875	-49.5	-49.2812	-49.3438	-49.5	-49.6875	-49.4688	-48.7812	-49.5312	-48.6562	-50.375	-50.0938	-49.7812	-50.5	-50.2812
		-0.6	0.68	-46.375	-45.9062	-46.25	-46.8125	-46.625	-46.4375	-46.4062	-46.7812	-48.1562	-47.9062	-47.6562	-47.7188	-47.7188	-48.9375	-48.6562	-48.7188	-48.875	-49.5312	-49.1875	-48.3125	-49.2188	-47.9688	-50.1875	-50.0312	-49.4375	-50.4062	-50.1562
		-0.6	0.7	-46.2188	-45.7812	-46.125	-46.3438	-46.0938	-45.9062	-45.8438	-46.1562	-47.5625	-47.4688	-47.1875	-47.3438	-47.3125	-48.375	-48.0938	-48.0312	-48.25	-49.375	-48.9375	-47.5312	-49	-46.6562	-50.1562	-49.9062	-49.1875	-50.3125	-50.0938
		-0.6	0.72	-46	-45.6875	-46	-45.7812	-45.5	-45.3125	-45.1562	-45.5625	-47.0625	-47	-46.7812	-46.7812	-46.8125	-47.5312	-47.1562	-46.7812	-47.3125	-49.1875	-48.75	-46.375	-48.6562	-44.6562	-50.1562	-49.9375	-48.7188	-50.3125	-50.1875
		-0.6	0.74	-45.7188	-45.4688	-45.8125	-45.1875	-44.7812	-44.5	-44.375	-44.9688	-46.5625	-46.5312	-46.2812	-46.4375	-46.375	-46.375	-45.7812	-44.9375	-45.7188	-49.0938	-48.3438	-44.4062	-48.2188	-41.75	-50.1562	-50.125	-47.75	-50.4375	-50.2812
		-0.6	0.76	-45	-44.9688	-45.5312	-44.5	-43.6875	-43.1562	-43.0312	-43.75	-45.9375	-45.9375	-45.7812	-45.9062	-45.7188	-44.4375	-43.375	-41.9062	-43.4375	-48.6875	-47.5938	-41.6562	-47.3125	-37.9688	-50	-50.2188	-46.25	-50.5938	-50.5625
		-0.6	0.78	-43.5312	-43.8438	-44.8438	-43.4688	-42.0312	-41.0312	-40.7812	-42	-45.0625	-45.3125	-44.8438	-45.1875	-44.6875	-41.5312	-40.0625	-38.0312	-40.125	-47.6562	-46.2812	-38.1875	-45.75	-32.625	-49.5625	-50.2188	-44	-50.8125	-50.8125
		-0.6	0.8	-41.5938	-42.0938	-43.4375	-41.6562	-39.3438	-37.9062	-37.625	-39.2812	-43.4688	-44.1562	-43.2812	-44.0312	-43	-37.5312	-35.4062	-32.375	-35.4062	-46	-44.2812	-33.4062	-43.5938	-24.6875	-48.5	-49.8125	-41.3438	-51.0625	-50.875
		-0.6	0.82	-39.0938	-39.6875	-41.4375	-38.875	-35.6562	-33.5	-33.1562	-35.4688	-41.125	-42.0938	-40.9688	-42.0938	-40.5312	-31.8125	-28.3438	-23.9375	-28.4062	-43.9375	-41.7188	-26.4375	-40.875	-14.75	-46.7812	-48.75	-38.1875	-51.25	-50.5625
		-0.6	0.84	-36.25	-37.125	-39.0625	-35.0938	-30.5938	-27.0938	-26.5625	-29.9062	-37.875	-39.2812	-37.6875	-39.3125	-37	-23.1562	-18.4062	-13.1875	-18.5312	-41.2812	-38.75	-17.1562	-37.7812	-4.78125	-44.6562	-47.1875	-34.2812	-51.4375	-49.6875
		-0.6	0.86	-32.9062	-34.1875	-36.3438	-29.8125	-22.8438	-17.8438	-17.1875	-21.5	-33.375	-35.5938	-33.4375	-35.5312	-32.0938	-12.5	-7.4375	-2.78125	-7.78125	-38.4688	-35	-7.34375	-34.0312	3.15625	-42.4062	-45.1875	-29.0625	-51.2812	-48.2812
		-0.6	0.88	-28.5938	-30.6875	-32.9688	-21.8438	-13.0312	-7.5625	-7	-11.1875	-26.6875	-30.0625	-27.0312	-30.1875	-24.75	-2.21875	1.875	5.59375	1.65625	-35	-29.875	0.9375	-28.7188	8.3125	-39.875	-43	-21.4375	-50.5625	-46.5
		-0.6	0.9	-22.4062	-26.0312	-28.7812	-11.7812	-3.28125	1.5	2	-1.28125	-17.5625	-22.1875	-18.0625	-22.2812	-14.9062	5.84375	8.65625	10.75	8.5	-30.7812	-22.5312	6.59375	-21.0625	10.1875	-37.3125	-40.7188	-12.3438	-49.2188	-44.3438
		-0.6	0.92	-14.0938	-19.1562	-22.7812	-1.90625	4.59375	8.21875	8.5	6.5625	-7.65625	-12.5	-8.21875	-12.5312	-4.8125	10.7812	11.9375	12.4062	11.8125	-24.3125	-13.375	9.28125	-11.9062	9	-34.4375	-38.5	-3.5625	-47.4688	-42.0625
		-0.6	0.94	-5.03125	-10.4375	-14.5938	5.8125	9.75	11.75	11.75	11.4062	0.875	-3.09375	0.59375	-3.125	3.5	12.3438	11.6875	10.7812	11.6562	-16.0312	-4.40625	9.0625	-3.15625	5.1875	-31	-36.1875	3.15625	-45.4375	-39.6875
		-0.6	0.96	3	-1.625	-5.21875	10.7188	11.8125	12	11.9375	13.0312	7.0625	4.375	6.96875	4.40625	9.21875	10.5312	8.53125	6.46875	8.6875	-7.21875	2.65625	6.15625	3.5	-0.40625	-26.0938	-33.8438	7.21875	-43.2188	-37.375
		-0.6	0.98	8.5	5.5	3	12.4688	10.8438	9.4375	9.3125	11.4375	10.2188	9.0625	10.3125	9.34375	11.7188	6.125	3.28125	0.15625	3.375	0.28125	7.125	1.25	7.5625	-7.1875	-18.9375	-31.25	8.5	-41.0312	-34.9062
		-0.6	1	11.4062	10.0312	9	11.0625	7.34375	4.78125	4.4375	7.5	10.3438	10.5938	10.6875	11.0625	11.125	-0.15625	-3.65625	-7.25	-3.40625	5.40625	8.78125	-5.0625	8.875	-14.6562	-10.5	-27.7188	7	-38.8438	-32.4062
		-0.6	1.02	11.4375	11.6875	12.1562	7.125	2.09375	-1.40625	-1.84375	1.5625	7.78125	9.40625	8.25	9.90625	7.90625	-7.375	-11.3125	-15	-10.9688	7.78125	7.625	-12.0938	7.40625	-22.1562	-2.53125	-22.5938	3.34375	-36.6562	-29.1562
		-0.6	1.04	9	10.8438	12.4375	1.5625	-4.3125	-8.40625	-8.90625	-5.3125	3.25	5.71875	3.78125	6.375	2.6875	-15.0938	-19.1562	-22.7188	-18.625	7.40625	4.25	-19.4062	3.6875	-29.2188	3.5	-15.3438	-1.875	-34.5938	-24.2812
		-0.6	1.06	4.53125	7.5	9.90625	-5.125	-11.2812	-15.6562	-16.2188	-12.5625	-2.71875	0.3125	-2.15625	1	-3.71875	-22.6562	-26.5	-29.8125	-26.0938	4.78125	-0.875	-26.375	-1.53125	-35.4062	7.0625	-7.375	-8.1875	-32.3438	-17.3125
		-0.6	1.08	-1.28125	2.625	5.46875	-12.5	-18.4062	-22.7812	-23.2812	-19.9375	-9.375	-6.15625	-8.9375	-5.5	-10.8438	-29.5938	-33	-35.7812	-32.5312	0.3125	-7.125	-32.6875	-7.78125	-40.75	8	-0.28125	-15.0938	-29.625	-9.03125
		-0.6	1.1	-7.84375	-3.53125	-0.3125	-19.5938	-25	-29.1562	-29.6562	-26.7188	-16.5	-13.125	-15.9062	-12.5312	-18.0312	-35.6875	-38.6562	-41	-38.1875	-5.40625	-14.1562	-38.2188	-14.6875	-45.125	6.40625	4.75	-22.375	-25.5625	-1.5
		-0.6	1.12	-14.9062	-10.4062	-7.125	-26.375	-31.1562	-34.75	-35.2812	-32.6875	-23.3125	-20.125	-22.8125	-19.4375	-24.8438	-40.7188	-43.3125	-45.0938	-42.8438	-12.0625	-21.2188	-42.8438	-21.5938	-48.5938	2.84375	7.375	-29	-19.3438	4.3125
		-0.6	1.14	-21.8438	-17.4375	-14.3438	-32.2812	-36.3125	-39.4375	-39.875	-37.7812	-29.5312	-26.6875	-29.125	-26.125	-31	-44.7812	-47.0625	-48.4375	-46.5	-18.9062	-27.875	-46.625	-28.25	-51.3438	-2.28125	7.40625	-35	-11.4375	7.5
		-0.6	1.16	-28.375	-24.25	-21.4375	-37.4062	-40.6875	-43.3438	-43.7812	-42.0312	-35	-32.5625	-34.7188	-32.0312	-36.2812	-48.0625	-50.0312	-51.0938	-49.4688	-25.75	-34.0938	-49.6562	-34.125	-53.5625	-8.4375	5.28125	-40.1562	-3.4375	8.1875
		-0.6	1.18	-33.9375	-30.4688	-27.8125	-41.625	-44.3125	-46.4688	-46.8438	-45.4375	-39.5938	-37.7188	-39.3438	-37.1875	-40.7188	-50.625	-52.3438	-53	-51.625	-31.9688	-39.375	-52	-39.3438	-55.1875	-15.3438	1.375	-44.4062	3	6.5
		-0.6	1.2	-38.8125	-35.7188	-33.5312	-45.0625	-47.0312	-48.7812	-49.2188	-48.1875	-43.5	-41.9375	-43.2188	-41.375	-44.2188	-52.5938	-53.9688	-54.5312	-53.3438	-37.4688	-43.8438	-53.9062	-43.5625	-56.5625	-22.3125	-3.9375	-47.8438	7.15625	2.90625
		-0.6	1.22	-42.8438	-40.3438	-38.375	-47.7188	-49.3125	-50.75	-51.0312	-50.3438	-46.5312	-45.375	-46.375	-44.9375	-47.0938	-54.0312	-55.1875	-55.5312	-54.5312	-42.1562	-47.4375	-55.3438	-47.1562	-57.4062	-28.9375	-10.2188	-50.6562	8.71875	-2.3125
		-0.6	1.24	-46.0625	-44.0938	-42.3125	-49.8438	-50.9688	-52.2188	-52.5	-51.7812	-48.9688	-48.0938	-48.8438	-47.625	-49.375	-55.0312	-56.1562	-56.2188	-55.5	-45.9688	-50.25	-56.4062	-49.9062	-58.1562	-34.875	-16.7188	-52.9375	7.71875	-8.40625
		-0.6	1.26	-48.6875	-47	-45.5938	-51.4375	-52.25	-53.2188	-53.5312	-52.9062	-50.8125	-50.2812	-50.75	-49.75	-51.0312	-55.7812	-56.7812	-56.8438	-56.125	-49.0938	-52.5625	-57.2812	-52.1562	-58.625	-40.0312	-23.3438	-54.625	4.59375	-15.0625
		-0.6	1.28	-50.6875	-49.3125	-48.1875	-52.6562	-53.2812	-53.9688	-54.25	-53.75	-52.4375	-51.875	-52.25	-51.4688	-52.375	-56.2188	-57.1562	-57.0938	-56.5312	-51.5625	-54.375	-57.9375	-53.9688	-59.125	-44.4688	-29.6875	-55.9688	-0.125	-21.8438
		-0.6	1.3	-52.375	-51.1562	-50.0625	-53.5312	-53.9062	-54.5312	-54.8125	-54.4375	-53.4062	-53.1562	-53.375	-52.6562	-53.2812	-56.5938	-57.4688	-57.4375	-56.7812	-53.5938	-55.6875	-58.3438	-55.2812	-59.4062	-47.9062	-35.2188	-57	-5.96875	-28.2188
		-0.6	1.32	-53.5625	-52.625	-51.5938	-54.1875	-54.4688	-55	-55.25	-54.7812	-54.2188	-54.1562	-54.1562	-53.5625	-53.9062	-56.6875	-57.6562	-57.5312	-57	-55.2188	-56.8125	-58.7188	-56.3438	-59.625	-50.8125	-40.0312	-57.6562	-12.625	-33.9688
		-0.6	1.34	-54.5	-53.7188	-52.7188	-54.625	-54.8125	-55.25	-55.4688	-55.0312	-54.8438	-54.8438	-54.6562	-54.2812	-54.3438	-56.8125	-57.7188	-57.4688	-57.0312	-56.4375	-57.5938	-59	-57.0625	-59.7188	-53.0312	-44.0625	-58.3125	-19.4375	-39.0312
		-0.6	1.36	-55.2812	-54.5625	-53.6562	-54.9062	-55.0625	-55.3438	-55.6562	-55.1875	-55.1875	-55.3438	-55.0938	-54.6875	-54.5625	-56.8125	-57.6562	-57.5	-56.9688	-57.3125	-58.2188	-59.25	-57.625	-59.8125	-54.75	-47.375	-58.6562	-26	-43.375
		-0.6	1.38	-55.8125	-55.2812	-54.3438	-55.125	-55.2188	-55.5312	-55.8125	-55.3125	-55.5625	-55.6562	-55.4375	-55.125	-54.75	-56.7812	-57.6875	-57.4688	-56.9375	-58	-58.625	-59.4375	-58.0938	-59.9062	-56.1875	-50.125	-59.0938	-32.0312	-46.8125
[truncated: 3,189 more rows]

## Sheet: panel C
	Sim. inhibition				Sim. excitation					in vivo principal LSO
	ITD-SNR	|left slope| (sp/click/ms)			ITD-SNR	|left slope| (sp/click/ms)				ITD-SNR	|left slope| (sp/click/ms)
	0.3014	N.D.			0.3739	N.D.				0.84	3.5459
[truncated: 15 more rows]

## Sheet: panel D
	current injection
[truncated: 47 more rows]

[truncated: 1 more sheets: panel E]
