# Supplementary material for: Glycinergic axonal inhibition subserves acute spatial sensitivity to sudden increases in sound intensity
Source: eLife journal article supplement (doi:10.7554/elife.62183), 2021-06-14
Supplement: supp [file elife-62183-supp-v1.zip › elife_poa_e62183_Figure_4_source_data_1.xlsx]

## Sheet: panel A
		Lead of inhibition (ms)	Time re. sim. IPSG (ms)	Vm (mV)	Vm (mV)	Vm (mV)	Vm (mV)	Vm (mV)	Vm (mV)	Vm (mV)	Vm (mV)	Vm (mV)	Vm (mV)	Vm (mV)	Vm (mV)	Vm (mV)	Vm (mV)	Vm (mV)	Vm (mV)	Vm (mV)	Vm (mV)	Vm (mV)	Vm (mV)	Vm (mV)
		-0.24	0	-64.2312	-64.7562	-64.6062	-65.15	-64.6344	-64.5375	-65.0594	-65.0375	-64.6937	-64.8156	-64.7	-64.6937	-64.4406	-64.2094
		-0.24	0.02	-63.6813	-64.3063	-64.2063	-64.7312	-64.1406	-64.0594	-64.6469	-64.5563	-64.2438	-64.3719	-64.2063	-64.1813	-64	-63.8344
		-0.24	0.04	-63.4562	-64.0188	-63.9062	-64.375	-63.7875	-63.75	-64.2688	-64.1344	-63.8438	-63.9813	-64.0219	-63.9219	-63.7406	-63.5531
		-0.24	0.06	-63.3594	-63.7094	-63.7062	-64.1094	-63.6125	-63.6406	-64.0969	-63.975	-63.7375	-63.75	-63.8187	-63.75	-63.4844	-63.3312
		-0.24	0.08	-63.0687	-63.6063	-63.5406	-64	-63.3812	-63.4156	-63.9219	-63.8156	-63.5812	-63.5625	-63.6281	-63.4844	-63.275	-63.1531
		-0.24	0.1	-63.1406	-63.4875	-63.4594	-63.8438	-63.2531	-63.2625	-63.7875	-63.7438	-63.4219	-63.45	-63.5406	-63.3312	-63.2156	-63.0531
		-0.24	0.12	-62.9375	-63.4	-63.3187	-63.7594	-63.2687	-63.1312	-63.8	-63.675	-63.3406	-63.45	-63.4562	-63.2781	-63.0906	-62.925
		-0.24	0.14	-62.8281	-63.3594	-63.2	-63.7156	-63.1469	-63.05	-63.7375	-63.5438	-63.2812	-63.3844	-63.3063	-63.25	-63.0094	-62.8563
		-0.24	0.16	-62.9594	-63.2594	-63.1469	-63.6437	-63.0469	-63.0062	-63.5906	-63.4531	-63.2	-63.2438	-63.2969	-63.1312	-62.9719	-62.8344
		-0.24	0.18	-62.7656	-63.15	-63.125	-63.6094	-63	-62.9625	-63.5563	-63.4375	-63.1781	-63.2562	-63.3031	-63.1031	-63.025	-62.7313
		-0.24	0.2	-62.7313	-63.0875	-63.0312	-63.6094	-63.0125	-62.8406	-63.425	-63.4313	-63.1094	-63.1969	-63.2156	-63.0469	-62.95	-62.6844
		-0.24	0.22	-62.8	-63.1594	-63.0406	-63.55	-62.975	-62.7969	-63.4437	-63.3812	-63.0625	-63.1063	-63.1	-63.0406	-62.875	-62.6969
		-0.24	0.24	-62.6875	-63.1312	-63.0219	-63.4813	-62.8812	-62.7812	-63.4562	-63.3063	-63.0812	-63.1625	-63.1156	-63.0312	-62.8625	-62.6594
		-0.24	0.26	-62.6594	-63.0312	-62.9562	-63.5031	-62.8719	-62.7375	-63.45	-63.3438	-63.05	-63.1594	-63.1312	-63.0406	-62.8219	-62.6406
		-0.24	0.28	-62.6375	-63.0625	-62.9313	-63.4156	-62.8406	-62.8156	-63.4469	-63.25	-62.9594	-63.05	-63.0938	-62.9875	-62.8281	-62.6625
		-0.24	0.3	-62.6125	-63.1094	-62.8656	-63.3563	-62.7531	-62.7656	-63.4313	-63.2	-62.9781	-63.0906	-62.9562	-62.8594	-62.7938	-62.6844
		-0.24	0.32	-62.5812	-63.075	-62.8812	-63.3781	-62.725	-62.65	-63.425	-63.2625	-62.9875	-63.1094	-62.925	-62.95	-62.8125	-62.65
		-0.24	0.34	-62.6781	-63.0375	-62.8812	-63.4	-62.7875	-62.7313	-63.3094	-63.1937	-62.9062	-63.1031	-63.0031	-62.8969	-62.7	-62.575
		-0.24	0.36	-62.6094	-63.075	-62.8625	-63.3719	-62.7875	-62.6875	-63.3781	-63.1906	-62.9219	-63.1219	-62.9062	-62.8875	-62.7438	-62.6219
		-0.24	0.38	-62.5062	-63.0219	-62.8375	-63.4813	-62.7125	-62.5969	-63.3531	-63.225	-62.9437	-63.1156	-62.9031	-62.9	-62.7812	-62.5687
		-0.24	0.4	-62.6094	-62.9562	-62.9125	-63.4313	-62.7188	-62.6406	-63.3469	-63.2281	-62.9062	-63.05	-62.9813	-62.9375	-62.725	-62.4938
		-0.24	0.42	-62.525	-62.9813	-62.8563	-63.3	-62.7562	-62.5938	-63.3875	-63.2438	-62.9437	-63.0312	-63.0375	-62.875	-62.6625	-62.5094
		-0.24	0.44	-62.5156	-63.025	-62.8	-63.3594	-62.6844	-62.575	-63.3594	-63.2375	-62.9594	-63.0125	-62.9844	-62.9125	-62.6875	-62.5
		-0.24	0.46	-62.5687	-62.9281	-62.7969	-63.3594	-62.6656	-62.6312	-63.2719	-63.1625	-62.8812	-62.9219	-63.0219	-62.9156	-62.65	-62.4656
		-0.24	0.48	-62.6	-62.9625	-62.75	-63.325	-62.6437	-62.5	-63.325	-63.1719	-62.9313	-62.9813	-63.0219	-62.8656	-62.5563	-62.4813
		-0.24	0.5	-62.575	-62.95	-62.7406	-63.4	-62.7062	-62.5406	-63.3063	-63.25	-62.8781	-63.0187	-62.9719	-62.8438	-62.5062	-62.5312
		-0.24	0.52	-62.5781	-62.9469	-62.7719	-63.3438	-62.6781	-62.5906	-63.3063	-63.2	-62.9094	-62.9813	-62.85	-62.825	-62.5625	-62.4656
		-0.24	0.54	-62.6	-62.8656	-62.7844	-63.2875	-62.6875	-62.5031	-63.2875	-63.1281	-62.9156	-63	-62.8688	-62.8406	-62.5594	-62.4406
		-0.24	0.56	-62.4906	-62.8625	-62.7375	-63.35	-62.7719	-62.55	-63.3281	-63.2	-62.975	-63.0594	-62.9594	-62.85	-62.5125	-62.5062
		-0.24	0.58	-62.4906	-62.9375	-62.8406	-63.2875	-62.7281	-62.5875	-63.2438	-63.175	-62.9375	-62.9188	-62.875	-62.7875	-62.55	-62.4656
		-0.24	0.6	-62.525	-62.825	-62.775	-63.1406	-62.6688	-62.425	-63.2344	-63.075	-62.9281	-62.75	-62.8344	-62.8625	-62.4625	-62.4781
		-0.24	0.62	-62.4469	-62.85	-62.6469	-63.1	-62.675	-62.2719	-63.2656	-63.1125	-62.9844	-62.725	-62.8812	-62.7594	-62.3688	-62.4625
		-0.24	0.64	-62.3719	-62.85	-62.6406	-62.9938	-62.7281	-62.1031	-63.2219	-62.9844	-62.8875	-62.6656	-62.95	-62.6469	-62.4	-62.5062
		-0.24	0.66	-62.3219	-62.7562	-62.4813	-62.8875	-62.7062	-61.8063	-63.2188	-62.8344	-62.7812	-62.6531	-62.8563	-62.6188	-62.3594	-62.3781
		-0.24	0.68	-62.2281	-62.6937	-62.2562	-62.7375	-62.6656	-61.65	-63.2594	-62.7	-62.6531	-62.5469	-62.8312	-62.4437	-62.1656	-62.325
		-0.24	0.7	-62	-62.6344	-62.15	-62.5812	-62.5938	-61.3969	-63.1375	-62.4969	-62.4813	-62.4875	-62.7844	-62.2125	-62.15	-62.2719
		-0.24	0.72	-61.7938	-62.5812	-61.8281	-62.3781	-62.5406	-61.1125	-63.1469	-62.1312	-62.25	-62.4906	-62.6406	-62.0375	-62.1219	-62.05
		-0.24	0.74	-61.575	-62.4375	-61.5469	-62.1969	-62.4688	-60.9062	-63.1094	-62	-62.05	-62.4625	-62.3781	-61.8	-61.95	-61.8
		-0.24	0.76	-61.3656	-62.3781	-61.3125	-62.0531	-62.2969	-60.6562	-62.9	-61.8937	-61.7875	-62.2938	-62.0687	-61.4938	-61.8187	-61.6562
		-0.24	0.78	-61.0906	-62.2062	-60.8719	-62	-62.1656	-60.3656	-62.7594	-61.35	-61.3688	-62.1188	-61.7875	-61.2375	-61.7625	-61.3906
		-0.24	0.8	-60.9	-61.9	-60.4813	-61.5969	-61.9813	-60.05	-62.5062	-61.0219	-60.9531	-61.9813	-61.3187	-61.0469	-61.5875	-61.025
		-0.24	0.82	-60.4469	-61.5094	-60.0719	-61.3719	-61.6562	-59.6688	-62.0969	-60.6437	-60.5438	-61.675	-60.6937	-60.6219	-61.35	-60.65
		-0.24	0.84	-60.0469	-61.0656	-59.525	-61.2219	-61.3281	-59.2062	-61.6562	-60.075	-59.9906	-61.1688	-60.0875	-60.0625	-61.05	-60.1
		-0.24	0.86	-59.5187	-60.4188	-58.8469	-60.8125	-61	-58.7219	-61.1156	-59.5281	-59.4875	-60.7156	-59.25	-59.4875	-60.7687	-59.3937
		-0.24	0.88	-58.7625	-59.625	-58.2	-60.4844	-60.5094	-57.9813	-60.325	-58.875	-58.8906	-59.9562	-58.1125	-58.7531	-60.2094	-58.6219
		-0.24	0.9	-57.925	-58.7969	-57.35	-59.9406	-59.8063	-57.0938	-59.4	-58.1406	-58.0938	-59.1063	-56.9844	-57.85	-59.4125	-57.7969
		-0.24	0.92	-56.9219	-57.8094	-56.3375	-59.1688	-58.9562	-56.1125	-58.4	-57.2	-57.2438	-58.225	-55.7344	-56.8719	-58.5938	-56.9531
		-0.24	0.94	-55.875	-56.65	-55.3781	-58.4969	-57.9094	-55.0438	-57.3375	-56.1531	-56.3594	-57.2062	-54.425	-55.7406	-57.6063	-55.8563
		-0.24	0.96	-54.7188	-55.5062	-54.3688	-57.5	-56.6063	-53.85	-56.2188	-55.0219	-55.2875	-56.0531	-53.025	-54.3937	-56.45	-54.9437
		-0.24	0.98	-53.4969	-54.2875	-53.2781	-56.4062	-55.1031	-52.7062	-55.1656	-53.6281	-54.1437	-54.8563	-51.5125	-53.0344	-55.3094	-54.0656
		-0.24	1	-52.4719	-52.9406	-52.3187	-55.2875	-53.6813	-51.4875	-54.1094	-52.35	-53.0844	-53.6531	-49.9844	-51.7313	-54.1625	-53.075
		-0.24	1.02	-51.3	-51.6781	-51.4437	-54.1969	-52.3406	-50.3187	-53.275	-50.9813	-51.8344	-52.3219	-48.3469	-50.3969	-53.0844	-52.2188
		-0.24	1.04	-50.3125	-50.5875	-50.4656	-53.1281	-50.9313	-49.2281	-52.2625	-49.6531	-50.6156	-51.0844	-46.1937	-49.0125	-52.0031	-51.4625
		-0.24	1.06	-49.3375	-49.4844	-49.6281	-52.1813	-49.6625	-48.0062	-51.325	-48.2844	-49.45	-49.9375	-43.0187	-47.6219	-51.0812	-50.675
		-0.24	1.08	-48.1781	-48.1094	-48.7406	-51.3031	-48.2625	-46.25	-50.5781	-46.575	-47.9813	-48.5469	-38.3656	-45.4031	-50.1125	-49.9
		-0.24	1.1	-46.4688	-46.4344	-47.45	-50.375	-46.1875	-43.3969	-49.6562	-43.7687	-45.75	-46.8281	-31.8469	-41.9219	-49.1094	-49.1719
		-0.24	1.12	-43.7188	-43.6813	-45.2625	-49.6531	-42.8781	-39.0094	-48.8625	-39.4813	-42.4656	-44.2531	-23.05	-36.9281	-48.05	-48.4125
		-0.24	1.14	-39.5656	-39.3281	-41.8906	-48.9656	-38.1781	-33.1437	-47.6094	-33.7844	-37.7062	-40.175	-12.2344	-30.2344	-46.3125	-47.0469
		-0.24	1.16	-33.8844	-33.5187	-36.9406	-48.1781	-31.8656	-25.275	-45.5125	-25.8875	-31.2719	-34.6312	-1.19062	-21.2	-43.4094	-44.65
		-0.24	1.18	-26.2563	-25.7188	-30.5187	-46.8563	-23.2812	-14.9937	-42.2438	-15.6594	-22.7094	-27	8.19063	-10.2844	-39.025	-41.0031
		-0.24	1.2	-16.35	-15.6906	-21.8531	-44.5219	-12.575	-3.91875	-37.3312	-4.5625	-12.0781	-17.25	14.5594	0.521875	-33.2531	-35.8375
		-0.24	1.22	-5.225	-4.51562	-11.2	-40.7656	-1.44687	5.97813	-31.0125	5.54688	-1.00312	-6.15312	17.15	9.3625	-25.5406	-29.075
		-0.24	1.24	4.9125	5.48125	-0.384375	-35.5906	7.98438	13.3094	-22.5094	13.1156	8.30625	4.18125	16.0156	15.0844	-15.475	-20.1313
		-0.24	1.26	12.5375	12.9062	8.62187	-28.9094	14.6469	17.0031	-11.8625	17.0531	14.6781	11.9969	11.5594	17.0844	-4.45	-9.35938
		-0.24	1.28	16.7	16.8219	14.6156	-19.9219	17.5063	16.8031	-0.96875	17.1156	17.4156	16.6219	4.71875	15.3438	5.35313	1.26875
		-0.24	1.3	17.1406	16.85	16.9688	-9.16562	16.4656	13.2437	8.33438	13.6875	16.3344	17.15	-3.49062	10.5781	12.7375	9.95625
		-0.24	1.32	13.9062	13.3562	15.7	1.34687	12.2094	6.975	14.6906	7.5375	11.9156	14.2375	-12.2937	3.675	16.7469	15.5
		-0.24	1.34	8	7.32812	11.1531	9.9125	5.525	-0.76875	17.4062	-0.209375	5.23125	8.59062	-21.1406	-4.56875	16.8156	17.3344
		-0.24	1.36	0.39375	-0.265625	4.40312	15.4187	-2.49062	-9.45938	16.3062	-8.84375	-2.87188	0.99375	-29.4656	-13.3687	13.5	15.4625
		-0.24	1.38	-8.1125	-8.99063	-3.76562	17.1531	-11.3375	-18.375	12.0094	-17.7437	-11.8031	-7.4875	-36.8	-22.0812	7.61562	10.4563
		-0.24	1.4	-17.0875	-17.9375	-12.5906	15.2031	-20.2344	-26.9406	5.47188	-26.3219	-20.6875	-16.4	-42.9781	-30.2062	0	3.38125
		-0.24	1.42	-25.7062	-26.4062	-21.3312	10.2844	-28.575	-34.525	-2.68125	-34.0656	-29.1938	-25.0625	-48.1531	-37.4969	-8.5875	-4.9375
		-0.24	1.44	-33.5031	-34.1875	-29.6031	3.24375	-36.175	-41.1719	-11.5031	-40.8094	-36.4313	-32.9469	-52.35	-43.6219	-17.4312	-13.7906
		-0.24	1.46	-40.3344	-40.9219	-36.9344	-5.09375	-42.6219	-46.75	-20.3781	-46.3688	-42.7656	-39.7781	-55.5187	-48.6656	-25.9531	-22.5844
		-0.24	1.48	-46.05	-46.5219	-43.15	-13.9	-47.8281	-51.0906	-28.7406	-50.9	-48.05	-45.55	-58.0125	-52.725	-33.7406	-30.7219
		-0.24	1.5	-50.55	-50.9469	-48.2719	-22.625	-52.0625	-54.6688	-36.175	-54.4406	-52.1656	-50.2875	-60.0219	-55.9844	-40.4906	-37.8719
		-0.24	1.52	-54.2812	-54.575	-52.3844	-30.8656	-55.475	-57.3812	-42.4656	-57.3312	-55.5781	-53.9188	-61.5625	-58.4094	-46.05	-43.9594
		-0.24	1.54	-57.1906	-57.4406	-55.5938	-38.0563	-57.9875	-59.5062	-47.7687	-59.5094	-58.0563	-56.775	-62.6531	-60.3688	-50.5469	-49.0219
		-0.24	1.56	-59.4031	-59.5656	-58.1594	-44.0687	-59.9562	-61.1813	-52.0469	-61.1375	-60.0938	-58.9813	-63.55	-61.9281	-54.1875	-52.9062
		-0.24	1.58	-61.1	-61.2219	-60.1937	-49.1063	-61.4969	-62.4719	-55.3094	-62.4969	-61.6688	-60.6188	-64.2344	-63.0594	-57.0312	-56.0812
		-0.24	1.6	-62.4969	-62.55	-61.6969	-53.1063	-62.6906	-63.3469	-57.9406	-63.45	-62.7687	-61.8656	-64.8094	-63.8844	-59.2	-58.5938
		-0.24	1.62	-63.4062	-63.5938	-62.7812	-56.1437	-63.5687	-64.0969	-60.0563	-64.0844	-63.6094	-62.8937	-65.1062	-64.5281	-60.8812	-60.425
		-0.24	1.64	-64.1	-64.3406	-63.6719	-58.6312	-64.2063	-64.5938	-61.5187	-64.5969	-64.25	-63.65	-65.3281	-64.9531	-62.2687	-61.85
		-0.24	1.66	-64.6594	-64.9781	-64.4969	-60.5531	-64.775	-64.9313	-62.6875	-65.075	-64.6344	-64.1062	-65.4812	-65.2156	-63.3031	-62.9313
		-0.24	1.68	-65.0813	-65.4344	-64.8594	-61.9656	-65.225	-65.225	-63.5719	-65.2812	-64.8688	-64.5344	-65.6	-65.4625	-63.9531	-63.7844
		-0.24	1.7	-65.3375	-65.6156	-65.275	-63.0375	-65.4	-65.4906	-64.2781	-65.4219	-65.175	-64.8688	-65.675	-65.7031	-64.4875	-64.3063
		-0.24	1.72	-65.5344	-65.7969	-65.4844	-63.8937	-65.6	-65.5219	-64.7344	-65.5844	-65.2344	-65	-65.7063	-65.7844	-64.9	-64.75
		-0.24	1.74	-65.7125	-66.0125	-65.5188	-64.475	-65.8219	-65.6656	-65.0656	-65.6156	-65.3063	-65.1125	-65.7281	-65.8469	-65.1781	-65.0875
		-0.24	1.76	-65.7625	-66.05	-65.7562	-64.8625	-65.8781	-65.7438	-65.4156	-65.6781	-65.4906	-65.2344	-65.7438	-65.9563	-65.3844	-65.2438
		-0.24	1.78	-65.8781	-66.0531	-65.75	-65.2	-65.8656	-65.6125	-65.5188	-65.7219	-65.4844	-65.3	-65.6656	-66.0312	-65.5813	-65.3375
		-0.24	1.8	-65.9688	-66.1438	-65.7656	-65.4594	-65.9344	-65.6906	-65.7281	-65.7375	-65.4437	-65.2625	-65.6219	-65.925	-65.6094	-65.425
		-0.24	1.82	-65.975	-66.1469	-65.8	-65.525	-66.0312	-65.7063	-65.8844	-65.6844	-65.5	-65.3375	-65.6	-65.9437	-65.6	-65.55
		-0.24	1.84	-65.9281	-66.0938	-65.7781	-65.6281	-66.0125	-65.6375	-65.9219	-65.6594	-65.4938	-65.325	-65.5437	-65.9062	-65.6188	-65.4719
		-0.24	1.86	-66.025	-66.0813	-65.6625	-65.7	-66.0281	-65.6844	-65.9375	-65.7063	-65.425	-65.2438	-65.5406	-65.9187	-65.6687	-65.5344
		-0.24	1.88	-66.0406	-66.1125	-65.7031	-65.7156	-66.0312	-65.6625	-66.0281	-65.6562	-65.4	-65.275	-65.6219	-65.8313	-65.6312	-65.6312
		-0.24	1.9	-66.0375	-66.0031	-65.6813	-65.7188	-66.025	-65.5938	-66.0125	-65.6531	-65.4375	-65.225	-65.6125	-65.8187	-65.6344	-65.6344
		-0.24	1.92	-65.9563	-65.9437	-65.625	-65.7875	-65.9406	-65.675	-66.0125	-65.725	-65.3844	-65.1375	-65.5594	-65.8125	-65.6375	-65.5375
		-0.24	1.94	-65.9625	-66.0156	-65.6594	-65.8187	-66.0219	-65.6375	-66.0188	-65.6312	-65.3375	-65.1875	-65.5781	-65.75	-65.6813	-65.5594
		-0.24	1.96	-65.8969	-66.0344	-65.7156	-65.6906	-66	-65.6406	-65.9594	-65.5844	-65.45	-65.1562	-65.6219	-65.7063	-65.6469	-65.5781
		-0.24	1.98	-65.8	-65.9938	-65.5813	-65.6937	-65.95	-65.725	-65.9625	-65.5969	-65.4437	-65.1625	-65.5312	-65.6844	-65.6406	-65.475
		-0.24	2	-65.7656	-66.0094	-65.6344	-65.675	-65.9625	-65.7375	-65.9844	-65.6813	-65.4219	-65.1813	-65.5469	-65.6	-65.6781	-65.425
		-0.24	2.02	-65.8281	-66.0188	-65.7	-65.6156	-65.975	-65.725	-66.0219	-65.6375	-65.4688	-65.1687	-65.5844	-65.5844	-65.6594	-65.4844
		-0.24	2.04	-65.725	-65.9344	-65.6594	-65.6531	-65.9688	-65.725	-65.9563	-65.6781	-65.4656	-65.1781	-65.5406	-65.6531	-65.5312	-65.4781
		-0.24	2.06	-65.6937	-65.8781	-65.6406	-65.7031	-65.9531	-65.6406	-65.9	-65.6687	-65.4	-65.1844	-65.5813	-65.6469	-65.5938	-65.45
		-0.24	2.08	-65.7375	-65.925	-65.6844	-65.6	-66.0781	-65.5813	-65.9156	-65.6094	-65.4938	-65.2781	-65.6906	-65.5969	-65.6625	-65.4531
		-0.24	2.1	-65.725	-66.0312	-65.6562	-65.5719	-66.0781	-65.6625	-65.8187	-65.6656	-65.4812	-65.1813	-65.6656	-65.5531	-65.6813	-65.4812
		-0.24	2.12	-65.6344	-65.9437	-65.6312	-65.6562	-66.0687	-65.6687	-65.8219	-65.7125	-65.4969	-65.1406	-65.6156	-65.6687	-65.6531	-65.4531
		-0.24	2.14	-65.6219	-66.0125	-65.6375	-65.5906	-66.1188	-65.6625	-65.85	-65.7312	-65.4938	-65.2531	-65.6875	-65.7531	-65.6719	-65.4969
		-0.24	2.16	-65.6469	-66.1	-65.6531	-65.5594	-66.1125	-65.7188	-65.85	-65.6687	-65.5844	-65.2562	-65.6969	-65.7063	-65.7156	-65.5875
		-0.24	2.18	-65.65	-66.0531	-65.6062	-65.5969	-66.0813	-65.7094	-65.8187	-65.7094	-65.5125	-65.2719	-65.6687	-65.8063	-65.7281	-65.55
		-0.24	2.2	-65.625	-65.9531	-65.7469	-65.6	-66.1562	-65.7094	-65.8781	-65.7656	-65.5938	-65.3844	-65.7063	-65.8562	-65.7188	-65.55
		-0.24	2.22	-65.675	-66.0875	-65.7781	-65.5687	-66.0969	-65.7625	-65.9688	-65.7281	-65.65	-65.4187	-65.7875	-65.8844	-65.7656	-65.6094
		-0.24	2.24	-65.7281	-66.1062	-65.7719	-65.5687	-66.0375	-65.7812	-65.8406	-65.7312	-65.625	-65.425	-65.7344	-65.9125	-65.725	-65.6969
		-0.24	2.26	-65.7094	-66.0781	-65.775	-65.6188	-66.1188	-65.7375	-65.9031	-65.7562	-65.6312	-65.45	-65.825	-65.9719	-65.7719	-65.6813
		-0.24	2.28	-65.7281	-66.0781	-65.8031	-65.6406	-66.1875	-65.8125	-65.9469	-65.7438	-65.725	-65.525	-65.9094	-66.025	-65.85	-65.6594
		-0.24	2.3	-65.7562	-66.1937	-65.8187	-65.6438	-66.1531	-65.9156	-65.9469	-65.8094	-65.7531	-65.4938	-65.9344	-65.9969	-65.95	-65.7812
		-0.24	2.32	-65.7844	-66.2	-65.8938	-65.6875	-66.2094	-65.9094	-65.95	-65.8719	-65.7562	-65.4875	-65.9313	-65.9344	-65.9781	-65.825
		-0.24	2.34	-65.75	-66.1781	-65.9594	-65.5781	-66.2969	-65.9437	-66.0219	-65.8625	-65.9031	-65.5625	-65.9719	-65.9938	-65.9875	-65.8094
		-0.24	2.36	-65.8281	-66.2156	-65.9688	-65.6531	-66.2969	-65.9656	-66.0594	-65.8375	-65.9156	-65.5437	-65.9844	-66.0188	-66.0844	-65.8562
		-0.24	2.38	-65.9156	-66.3	-65.9688	-65.7094	-66.35	-65.9125	-66.0719	-65.8875	-65.9094	-65.5687	-66.1	-66.0219	-66.0656	-65.9281
		-0.24	2.4	-65.8594	-66.25	-65.9844	-65.6937	-66.3625	-65.975	-66.1813	-65.9969	-65.9437	-65.7125	-66.15	-66.1094	-66.0719	-65.9406
		-0.24	2.42	-65.8344	-66.2969	-66.0625	-65.6219	-66.3875	-66.0813	-66.0906	-65.9313	-65.9656	-65.6875	-66.15	-66.1312	-66.075	-65.8812
		-0.24	2.44	-65.9688	-66.4156	-66.0375	-65.6625	-66.5156	-65.9719	-66.1281	-66.0344	-66.0219	-65.7063	-66.1406	-66.1125	-66.125	-65.95
		-0.24	2.46	-66.0062	-66.3656	-66.0813	-65.7156	-66.4906	-66.0062	-66.2344	-66.1281	-66.0062	-65.8	-66.1625	-66.0938	-66.1281	-65.9625
		-0.24	2.48	-65.9437	-66.4313	-66.15	-65.6875	-66.45	-66.0875	-66.2	-66.0625	-66.0906	-65.8344	-66.1406	-66.1	-66.1	-65.8938
		-0.24	2.5	-66.0281	-66.475	-66.0813	-65.7031	-66.4719	-66.0844	-66.2063	-66.0906	-66.15	-65.8031	-66.2688	-66.1562	-66.2	-65.9469
		-0.24	2.52	-66.0469	-66.4625	-66.2	-65.775	-66.5188	-66.0969	-66.2344	-66.1156	-66.1281	-65.8375	-66.325	-66.1594	-66.25	-66.0312
		-0.24	2.54	-66.0656	-66.4656	-66.2125	-65.7719	-66.55	-66.1937	-66.2937	-66.0938	-66.175	-65.8781	-66.3063	-66.1562	-66.2	-66.0375
		-0.24	2.56	-66.0406	-66.4	-66.1937	-65.7156	-66.6219	-66.2281	-66.25	-66.0375	-66.2781	-65.8562	-66.3906	-66.2344	-66.2375	-66.0625
		-0.24	2.58	-66.1156	-66.575	-66.2531	-65.7812	-66.5938	-66.2156	-66.2969	-66.15	-66.2625	-65.9313	-66.3063	-66.2656	-66.3375	-66.1188
		-0.24	2.6	-66.1312	-66.5594	-66.3313	-65.875	-66.5969	-66.2656	-66.3344	-66.2125	-66.2438	-65.9969	-66.3125	-66.2594	-66.325	-66.1969
		-0.24	2.62	-66.0781	-66.5094	-66.3562	-65.9062	-66.6344	-66.2594	-66.3094	-66.2312	-66.3063	-65.95	-66.3938	-66.3625	-66.3	-66.1438
		-0.24	2.64	-66.0844	-66.6375	-66.3313	-65.8844	-66.5625	-66.2719	-66.2844	-66.2094	-66.2656	-65.9875	-66.4	-66.4156	-66.3531	-66.1813
		-0.24	2.66	-66.1594	-66.65	-66.3969	-65.9313	-66.6344	-66.3625	-66.3531	-66.275	-66.2937	-66.05	-66.4187	-66.3469	-66.4	-66.1937
		-0.24	2.68	-66.1281	-66.6281	-66.4219	-65.9	-66.6438	-66.3688	-66.3625	-66.2688	-66.35	-66.0719	-66.4812	-66.3375	-66.3594	-66.25
		-0.24	2.7	-66.1219	-66.5813	-66.3938	-65.9031	-66.6281	-66.325	-66.3219	-66.2781	-66.3438	-66.0563	-66.4344	-66.3969	-66.3125	-66.2469
		-0.24	2.72	-66.2063	-66.6813	-66.4094	-65.9469	-66.7063	-66.3812	-66.4281	-66.2844	-66.3156	-66.1438	-66.4187	-66.4219	-66.3781	-66.2469
		-0.24	2.74	-66.2375	-66.7125	-66.5406	-65.9688	-66.7625	-66.4219	-66.45	-66.3781	-66.3906	-66.1094	-66.5062	-66.425	-66.475	-66.325
		-0.24	2.76	-66.2031	-66.6031	-66.5312	-65.9563	-66.7156	-66.3938	-66.4469	-66.35	-66.4594	-66.0781	-66.5469	-66.4781	-66.4656	-66.3
		-0.24	2.78	-66.2562	-66.6656	-66.5031	-65.9719	-66.75	-66.4875	-66.45	-66.325	-66.4781	-66.0531	-66.5469	-66.5469	-66.4625	-66.3594
		-0.24	2.8	-66.2688	-66.7719	-66.5938	-66.0437	-66.7656	-66.5125	-66.5531	-66.3562	-66.45	-66.1312	-66.6312	-66.4875	-66.5531	-66.375
		-0.24	2.82	-66.275	-66.8313	-66.5813	-66.0813	-66.6813	-66.4156	-66.5	-66.3156	-66.5844	-66.1219	-66.5344	-66.4563	-66.5531	-66.3719
		-0.24	2.84	-66.25	-66.7906	-66.5219	-66.1312	-66.7969	-66.5094	-66.5125	-66.3187	-66.5188	-66.1781	-66.6094	-66.5062	-66.5312	-66.3906
		-0.24	2.86	-66.3	-66.7375	-66.5938	-66.15	-66.8344	-66.5594	-66.6375	-66.3969	-66.475	-66.2375	-66.5906	-66.55	-66.55	-66.3313
		-0.24	2.88	-66.3094	-66.7844	-66.6813	-66.1844	-66.8	-66.525	-66.6188	-66.3844	-66.5594	-66.2625	-66.55	-66.5	-66.5938	-66.4
		-0.24	2.9	-66.325	-66.7719	-66.6375	-66.1281	-66.875	-66.5687	-66.6312	-66.3031	-66.5844	-66.25	-66.5906	-66.5437	-66.5594	-66.4406
		-0.24	2.92	-66.275	-66.75	-66.6188	-66.1469	-66.8313	-66.6687	-66.6781	-66.3	-66.5437	-66.275	-66.7063	-66.5719	-66.5125	-66.3719
		-0.24	2.94	-66.3125	-66.8031	-66.7438	-66.2937	-66.8125	-66.65	-66.7	-66.3656	-66.5844	-66.3719	-66.6719	-66.575	-66.55	-66.375
		-0.24	2.96	-66.3719	-66.8281	-66.775	-66.2656	-66.85	-66.6469	-66.6687	-66.325	-66.6875	-66.3375	-66.7219	-66.5406	-66.6344	-66.3938
		-0.24	2.98	-66.375	-66.7781	-66.775	-66.2281	-66.8281	-66.6281	-66.6875	-66.3063	-66.6719	-66.3156	-66.7312	-66.6375	-66.6594	-66.4187
		-0.24	3	-66.3187	-66.8063	-66.7844	-66.2688	-66.7937	-66.4531	-66.6969	-66.3625	-66.6188	-66.4062	-66.7031	-66.65	-66.6094	-66.4688
		-0.24	3.02	-66.2969	-66.8531	-66.8375	-66.2156	-66.8875	-66.625	-66.6469	-66.425	-66.6656	-66.4844	-66.7875	-66.5375	-66.6438	-66.5344
		-0.24	3.04	-66.3313	-66.8844	-66.75	-66.1906	-66.8344	-66.6438	-66.6406	-66.35	-66.65	-66.4156	-66.7	-66.5281	-66.6188	-66.5094
		-0.24	3.06	-66.2875	-66.9219	-66.7812	-66.2094	-66.8781	-66.6312	-66.7812	-66.3875	-66.6312	-66.475	-66.7531	-66.6156	-66.5625	-66.5
		-0.24	3.08	-66.3438	-66.9313	-66.8219	-66.325	-66.95	-66.6406	-66.7562	-66.425	-66.6969	-66.45	-66.7406	-66.65	-66.5969	-66.4594
		-0.24	3.1	-66.3875	-66.9688	-66.8281	-66.2937	-66.8438	-66.6656	-66.7406	-66.4	-66.7188	-66.4156	-66.7781	-66.575	-66.6312	-66.5
		-0.24	3.12	-66.4281	-67	-66.7719	-66.2531	-66.8781	-66.7375	-66.7406	-66.4125	-66.6594	-66.4625	-66.7094	-66.6125	-66.6687	-66.55
		-0.24	3.14	-66.3125	-66.9844	-66.7719	-66.3	-66.85	-66.6594	-66.7688	-66.4125	-66.7375	-66.5312	-66.8313	-66.6188	-66.6375	-66.4844
		-0.24	3.16	-66.3938	-66.9875	-66.8469	-66.3594	-66.8625	-66.6469	-66.7656	-66.3688	-66.7625	-66.5312	-66.8	-66.6125	-66.6219	-66.4906
		-0.24	3.18	-66.3938	-67.0281	-66.7469	-66.3063	-66.8531	-66.7188	-66.7688	-66.375	-66.6687	-66.5062	-66.8688	-66.6188	-66.6156	-66.5219
		-0.24	3.2	-66.3031	-66.9906	-66.7562	-66.375	-66.875	-66.6687	-66.7875	-66.4313	-66.6781	-66.575	-66.8156	-66.6031	-66.5875	-66.5
		-0.24	3.22	-66.3187	-66.9281	-66.7875	-66.3906	-66.9406	-66.65	-66.7344	-66.5156	-66.7562	-66.5406	-66.85	-66.6188	-66.5375	-66.4938
		-0.24	3.24	-66.3656	-66.9625	-66.8219	-66.4	-66.975	-66.725	-66.7719	-66.525	-66.7	-66.4688	-66.9406	-66.6312	-66.5813	-66.5406
		-0.24	3.26	-66.2875	-67.0625	-66.7438	-66.3594	-66.925	-66.7188	-66.8406	-66.4625	-66.6937	-66.4688	-66.9437	-66.5594	-66.6125	-66.55
		-0.24	3.28	-66.3219	-67.0437	-66.7594	-66.3906	-66.9281	-66.6594	-66.8906	-66.5469	-66.7406	-66.5219	-66.8531	-66.5406	-66.5844	-66.5094
		-0.24	3.3	-66.3031	-66.9781	-66.8281	-66.4812	-66.9875	-66.6562	-66.8156	-66.4719	-66.7562	-66.4906	-66.8875	-66.5875	-66.5656	-66.5188
		-0.24	3.32	-66.375	-67.0375	-66.75	-66.45	-66.9844	-66.7	-66.8781	-66.4219	-66.7625	-66.4594	-66.8688	-66.5875	-66.6188	-66.5563
		-0.24	3.34	-66.3219	-67	-66.8094	-66.5312	-66.9187	-66.5969	-66.9094	-66.45	-66.7688	-66.5781	-66.8469	-66.5719	-66.7	-66.5813
		-0.24	3.36	-66.275	-66.9375	-66.8156	-66.5656	-66.925	-66.65	-66.8344	-66.5	-66.8594	-66.5906	-66.9375	-66.6375	-66.6156	-66.5594
		-0.24	3.38	-66.35	-66.8063	-66.7812	-66.5188	-66.8781	-66.6719	-66.8	-66.4781	-66.8	-66.5469	-66.9156	-66.6687	-66.6531	-66.4969
		-0.24	3.4	-66.45	-66.8094	-66.7438	-66.4406	-66.9281	-66.6594	-66.8375	-66.5125	-66.7438	-66.5656	-66.9	-66.5656	-66.6375	-66.5188
		-0.24	3.42	-66.425	-66.7656	-66.8	-66.5188	-66.9375	-66.6906	-66.8344	-66.55	-66.7781	-66.5938	-66.95	-66.5156	-66.5875	-66.525
		-0.24	3.44	-66.3313	-66.6	-66.8063	-66.5813	-66.8844	-66.7844	-66.8344	-66.5594	-66.7469	-66.55	-66.8562	-66.5125	-66.5312	-66.5062
		-0.24	3.46	-66.4062	-66.5031	-66.7281	-66.4844	-66.875	-66.7469	-66.8812	-66.5	-66.6594	-66.55	-66.7875	-66.5469	-66.575	-66.5094
		-0.24	3.48	-66.4	-66.4375	-66.7156	-66.4344	-66.9	-66.7562	-66.9125	-66.5219	-66.6719	-66.6344	-66.85	-66.5062	-66.5781	-66.5531
		-0.24	3.5	-66.3531	-66.4406	-66.7469	-66.4875	-66.8469	-66.7719	-66.775	-66.5719	-66.6906	-66.5563	-66.8688	-66.5437	-66.4719	-66.5687
		-0.24	3.52	-66.3719	-66.3187	-66.7281	-66.5406	-66.8781	-66.7125	-66.8781	-66.5219	-66.65	-66.4938	-66.8625	-66.5719	-66.5125	-66.5563
		-0.24	3.54	-66.3562	-66.3094	-66.7625	-66.5281	-66.8969	-66.6906	-66.8906	-66.4812	-66.65	-66.6094	-66.8938	-66.5656	-66.5281	-66.5375
		-0.24	3.56	-66.35	-66.3187	-66.7906	-66.55	-66.9062	-66.725	-66.8688	-66.6	-66.7063	-66.5781	-66.8719	-66.5437	-66.4812	-66.5156
		-0.24	3.58	-66.2781	-66.2812	-66.7656	-66.5781	-66.8938	-66.75	-66.8313	-66.6031	-66.7	-66.4875	-66.9	-66.6031	-66.4875	-66.475
		-0.24	3.6	-66.3	-66.2969	-66.7344	-66.5188	-66.8875	-66.6969	-66.8594	-66.6031	-66.7094	-66.4219	-66.8906	-66.575	-66.5156	-66.4437
		-0.24	3.62	-66.3	-66.3	-66.75	-66.4969	-66.8187	-66.7063	-66.8844	-66.5437	-66.7	-66.5375	-66.8469	-66.5656	-66.5	-66.4938
		-0.24	3.64	-66.2844	-66.25	-66.8313	-66.5	-66.7594	-66.7094	-66.85	-66.5406	-66.6813	-66.4844	-66.8812	-66.5844	-66.55	-66.5281
		-0.24	3.66	-66.275	-66.1687	-66.7562	-66.5344	-66.7188	-66.6562	-66.8406	-66.5125	-66.6375	-66.4812	-66.9125	-66.6062	-66.5406	-66.4625
		-0.24	3.68	-66.3125	-66.25	-66.8	-66.5281	-66.6406	-66.6375	-66.8906	-66.4875	-66.6531	-66.5437	-66.875	-66.5813	-66.5281	-66.5062
		-0.24	3.7	-66.2688	-66.3688	-66.8344	-66.5625	-66.575	-66.7406	-66.8344	-66.5437	-66.6781	-66.5406	-66.8812	-66.55	-66.5469	-66.4906
		-0.24	3.72	-66.275	-66.325	-66.8063	-66.5281	-66.5687	-66.7	-66.8438	-66.5687	-66.7188	-66.4688	-66.8938	-66.5969	-66.5687	-66.4531
		-0.24	3.74	-66.2937	-66.3281	-66.7969	-66.5094	-66.4719	-66.6656	-66.85	-66.5437	-66.6969	-66.5281	-66.9	-66.5563	-66.4688	-66.4156
		-0.24	3.76	-66.3594	-66.4	-66.8313	-66.4875	-66.3969	-66.7281	-66.7875	-66.4812	-66.7531	-66.55	-66.9094	-66.5344	-66.4187	-66.45
		-0.24	3.78	-66.3156	-66.3531	-66.8719	-66.55	-66.4062	-66.7438	-66.7219	-66.5031	-66.7063	-66.475	-66.9	-66.5844	-66.45	-66.4563
		-0.24	3.8	-66.2281	-66.3187	-66.7937	-66.5344	-66.3	-66.6438	-66.75	-66.5437	-66.6156	-66.475	-66.8719	-66.5875	-66.4469	-66.4
		-0.24	3.82	-66.2562	-66.3469	-66.8063	-66.5531	-66.2937	-66.6937	-66.7656	-66.5156	-66.5781	-66.5219	-66.9062	-66.4938	-66.4313	-66.4281
		-0.24	3.84	-66.2875	-66.3375	-66.8625	-66.55	-66.3063	-66.675	-66.7469	-66.4844	-66.7156	-66.4688	-66.8844	-66.5188	-66.4594	-66.4844
		-0.24	3.86	-66.2812	-66.2906	-66.7969	-66.6188	-66.2438	-66.7	-66.7281	-66.4563	-66.6188	-66.45	-66.8219	-66.5594	-66.4125	-66.4531
		-0.24	3.88	-66.2188	-66.2688	-66.7281	-66.5437	-66.3344	-66.6781	-66.7312	-66.4594	-66.5844	-66.45	-66.8469	-66.5781	-66.3875	-66.35
		-0.24	3.9	-66.2719	-66.2719	-66.7781	-66.5875	-66.3344	-66.6469	-66.7031	-66.4469	-66.5656	-66.4719	-66.8281	-66.575	-66.5312	-66.4
		-0.24	3.92	-66.275	-66.2562	-66.6969	-66.5969	-66.3781	-66.5594	-66.6531	-66.4875	-66.5563	-66.3781	-66.8438	-66.5719	-66.4	-66.4187
		-0.24	3.94	-66.1875	-66.3	-66.6687	-66.5531	-66.3844	-66.5531	-66.6719	-66.5125	-66.525	-66.4187	-66.8625	-66.4812	-66.3906	-66.3313
		-0.24	3.96	-66.1562	-66.3344	-66.7188	-66.4844	-66.3594	-66.5906	-66.725	-66.5156	-66.5125	-66.4844	-66.8	-66.425	-66.4469	-66.35
		-0.24	3.98	-66.175	-66.3344	-66.775	-66.5156	-66.2812	-66.625	-66.6906	-66.55	-66.5781	-66.3594	-66.7562	-66.4563	-66.4281	-66.4094
		-0.24	4	-66.1969	-66.3125	-66.6719	-66.5656	-66.2906	-66.575	-66.65	-66.5781	-66.55	-66.3656	-66.8	-66.4187	-66.3656	-66.3812
		-0.24	4.02	-66.1219	-66.3875	-66.7469	-66.5406	-66.3281	-66.6125	-66.725	-66.5	-66.4688	-66.3688	-66.7625	-66.5156	-66.375	-66.3812
		-0.24	4.04	-66.075	-66.3406	-66.75	-66.4969	-66.2688	-66.6156	-66.7156	-66.4437	-66.4563	-66.35	-66.7438	-66.475	-66.3281	-66.3938
		-0.24	4.06	-66.1656	-66.3656	-66.7344	-66.55	-66.25	-66.4781	-66.6562	-66.4531	-66.4688	-66.3094	-66.7562	-66.4531	-66.3	-66.35
		-0.24	4.08	-66.1031	-66.4	-66.65	-66.5844	-66.2781	-66.5344	-66.6844	-66.4844	-66.3906	-66.2688	-66.6406	-66.4406	-66.3812	-66.4125
		-0.24	4.1	-66.0563	-66.3187	-66.6906	-66.5281	-66.2156	-66.5594	-66.6094	-66.3875	-66.4	-66.3719	-66.6719	-66.4938	-66.3	-66.5125
		-0.24	4.12	-66.1125	-66.3875	-66.7469	-66.5406	-66.2063	-66.5437	-66.5813	-66.35	-66.4812	-66.25	-66.7219	-66.4062	-66.2781	-66.4219
		-0.24	4.14	-66.1375	-66.4	-66.6438	-66.5656	-66.2969	-66.4219	-66.6	-66.4625	-66.3969	-66.2469	-66.6844	-66.3594	-66.3	-66.3313
		-0.24	4.16	-66.1406	-66.3781	-66.6312	-66.5188	-66.3	-66.4781	-66.7	-66.4563	-66.4094	-66.3281	-66.6375	-66.3938	-66.2188	-66.4125
		-0.24	4.18	-66.05	-66.3281	-66.7312	-66.5094	-66.2844	-66.4938	-66.65	-66.3406	-66.4031	-66.2562	-66.6906	-66.325	-66.2281	-66.3438
		-0.24	4.2	-66.0656	-66.3438	-66.7156	-66.4969	-66.3187	-66.4344	-66.5375	-66.3531	-66.3875	-66.2344	-66.6469	-66.35	-66.3	-66.275
		-0.24	4.22	-66.0969	-66.35	-66.6594	-66.5312	-66.275	-66.475	-66.5969	-66.3906	-66.3719	-66.2281	-66.6937	-66.3938	-66.25	-66.35
		-0.24	4.24	-66.0188	-66.2844	-66.6531	-66.4469	-66.2688	-66.4938	-66.6062	-66.3938	-66.2781	-66.2188	-66.7125	-66.3094	-66.2719	-66.3594
		-0.24	4.26	-66	-66.3	-66.675	-66.425	-66.3187	-66.475	-66.55	-66.3531	-66.35	-66.1094	-66.6937	-66.3	-66.3125	-66.3187
		-0.24	4.28	-66.0687	-66.3406	-66.6344	-66.5219	-66.3344	-66.4656	-66.5125	-66.3281	-66.325	-66.1	-66.6875	-66.3	-66.2625	-66.3344
		-0.24	4.3	-66.0813	-66.3406	-66.625	-66.4688	-66.3156	-66.4938	-66.5563	-66.3688	-66.2844	-66.1594	-66.75	-66.2906	-66.3812	-66.3125
		-0.24	4.32	-66.0469	-66.3094	-66.6594	-66.45	-66.3094	-66.475	-66.6094	-66.3719	-66.2969	-66.1188	-66.6813	-66.2688	-66.3625	-66.275
		-0.24	4.34	-65.9969	-66.225	-66.725	-66.4375	-66.25	-66.4219	-66.5625	-66.3	-66.3281	-66.1219	-66.7344	-66.2969	-66.2969	-66.2875
		-0.24	4.36	-66.0563	-66.2594	-66.625	-66.4	-66.2969	-66.4219	-66.55	-66.3688	-66.3375	-66.1156	-66.7125	-66.2688	-66.3438	-66.3125
		-0.24	4.38	-66.075	-66.2344	-66.5875	-66.3844	-66.3594	-66.45	-66.5813	-66.35	-66.325	-66.1219	-66.6875	-66.2406	-66.3219	-66.2844
		-0.24	4.4	-65.9844	-66.1875	-66.6281	-66.3844	-66.2688	-66.4156	-66.4875	-66.3	-66.3969	-66.0437	-66.6844	-66.2625	-66.2531	-66.3344
		-0.24	4.42	-66.0094	-66.2688	-66.5656	-66.4375	-66.2781	-66.3688	-66.5	-66.2969	-66.3	-66.0375	-66.6875	-66.1969	-66.2188	-66.3344
		-0.24	4.44	-66.0625	-66.25	-66.6219	-66.425	-66.2937	-66.4406	-66.5188	-66.2937	-66.2094	-66.1594	-66.6687	-66.25	-66.1844	-66.2406
		-0.24	4.46	-66	-66.1562	-66.6094	-66.3719	-66.2406	-66.3156	-66.5813	-66.3281	-66.2562	-66.1062	-66.5719	-66.275	-66.1594	-66.3187
		-0.24	4.48	-65.8969	-66.2125	-66.5687	-66.3219	-66.2188	-66.2406	-66.4969	-66.2969	-66.2812	-66.0594	-66.6406	-66.2063	-66.1656	-66.3063
		-0.24	4.5	-65.9563	-66.1687	-66.4906	-66.3625	-66.1969	-66.3281	-66.4313	-66.2438	-66.2219	-66.05	-66.5656	-66.2188	-66.1656	-66.25
		-0.24	4.52	-65.9375	-66.1719	-66.4875	-66.4094	-66.1969	-66.4	-66.45	-66.25	-66.2375	-66.0719	-66.5656	-66.2	-66.1438	-66.2281
		-0.24	4.54	-65.9594	-66.1594	-66.5437	-66.3719	-66.2312	-66.3094	-66.4938	-66.2375	-66.2188	-66.0125	-66.5656	-66.15	-66.1813	-66.2188
		-0.24	4.56	-65.9688	-66.0875	-66.5469	-66.3594	-66.2469	-66.2531	-66.45	-66.1937	-66.2094	-65.9875	-66.5188	-66.1312	-66.175	-66.2094
		-0.24	4.58	-66.0594	-66.1813	-66.4531	-66.3875	-66.1625	-66.2594	-66.4313	-66.2656	-66.1531	-66.0656	-66.4625	-66.1875	-66.125	-66.2781
		-0.24	4.6	-65.95	-66.1719	-66.475	-66.3719	-66.1719	-66.25	-66.4656	-66.3219	-66.1687	-66.0781	-66.5625	-66.1094	-66.175	-66.2156
		-0.24	4.62	-65.9313	-66.1344	-66.5156	-66.4125	-66.2	-66.25	-66.5	-66.2344	-66.2375	-66.0375	-66.5219	-66.1281	-66.1562	-66.1906
		-0.24	4.64	-65.9	-66.1188	-66.45	-66.4531	-66.1469	-66.2281	-66.3875	-66.1625	-66.1438	-66.075	-66.5156	-66.1344	-66.15	-66.2688
		-0.24	4.66	-65.9156	-66.1438	-66.4313	-66.4688	-66.1406	-66.2312	-66.3812	-66.2531	-66.1937	-66.1062	-66.5188	-66.1312	-66.1719	-66.2156
		-0.24	4.68	-65.8781	-66.05	-66.4625	-66.3531	-66.1813	-66.1438	-66.4187	-66.2375	-66.1969	-66.0219	-66.4844	-66.15	-66.1	-66.2281
		-0.24	4.7	-65.8688	-66.0844	-66.4187	-66.3313	-66.15	-66.15	-66.3438	-66.1625	-66.1	-65.95	-66.4469	-66.0625	-66.0844	-66.2688
		-0.24	4.72	-65.9781	-66.075	-66.375	-66.3969	-66.1875	-66.2125	-66.3	-66.2156	-66.0469	-65.9563	-66.5	-66.025	-66.1125	-66.2125
		-0.24	4.74	-65.8656	-66.1	-66.3594	-66.4781	-66.2344	-66.1625	-66.3313	-66.1469	-66.0969	-65.9375	-66.4531	-66.1062	-66.0344	-66.2125
		-0.24	4.76	-65.8094	-66.1062	-66.3063	-66.3438	-66.2281	-66.1781	-66.2969	-66.1	-66.15	-65.8531	-66.4281	-66.1	-66.0219	-66.2344
		-0.24	4.78	-65.8219	-66.0188	-66.3094	-66.35	-66.2281	-66.15	-66.2937	-66.0813	-66.1156	-65.8594	-66.4969	-66.0656	-66.05	-66.1594
		-0.24	4.8	-65.8187	-66.0062	-66.3094	-66.375	-66.2312	-66.1344	-66.2	-66.0625	-66.0563	-65.9	-66.3938	-66.125	-66.0188	-66.1312
		-0.24	4.82	-65.8875	-66.1344	-66.375	-66.325	-66.1312	-66.0625	-66.2812	-66.1	-66.05	-65.9125	-66.3219	-66.0625	-66.0156	-66.15
		-0.24	4.84	-65.8719	-66.0594	-66.375	-66.2625	-66.0813	-66.0687	-66.2656	-66.0656	-66.0875	-65.825	-66.35	-66.0437	-66.0062	-66.0656
		-0.24	4.86	-65.7937	-66.0906	-66.3	-66.3094	-66.1875	-66.1312	-66.1937	-66.0375	-65.9938	-65.8313	-66.2906	-66.0938	-65.95	-66.0656
		-0.24	4.88	-65.7188	-66.0687	-66.3	-66.375	-66.1687	-66.0938	-66.2	-66.0312	-66.025	-65.8469	-66.2312	-66.0531	-66.0031	-66.1031
		-0.24	4.9	-65.7812	-66.0281	-66.3844	-66.3594	-66.1406	-66.0375	-66.2469	-66.0062	-66.0687	-65.8719	-66.2594	-66.05	-65.9844	-66.05
		-0.24	4.92	-65.8125	-66	-66.3688	-66.3625	-66.1781	-66.0656	-66.1969	-65.975	-66.0375	-65.8063	-66.3094	-66.0125	-65.9375	-66.0938
		-0.24	4.94	-65.7906	-66.0531	-66.325	-66.3125	-66.1219	-66.0469	-66.1594	-65.95	-65.9719	-65.7781	-66.225	-66.0281	-65.9344	-66.1375
		-0.24	4.96	-65.7875	-65.9469	-66.2969	-66.35	-66.0969	-66.0281	-66.1594	-65.975	-65.9812	-65.8656	-66.1875	-66.0844	-65.9688	-66.0625
		-0.24	4.98	-65.8562	-66.0406	-66.35	-66.3594	-66.0531	-66.0312	-66.1719	-65.9656	-66.0469	-65.7781	-66.2125	-66.0938	-65.9625	-66.0969
		-0.14	0	-70.65	-70.6375	-70.5469	-70.3781	-70.2906	-70.4406	-70.4625	-70.2969	-70.3594	-70.5781	-70.2156	-70.7812	-70.1
		-0.14	0.02	-68.9125	-68.8187	-68.8344	-68.7188	-68.6	-68.7	-68.7844	-68.6625	-68.6156	-68.925	-68.45	-68.975	-68.3562
		-0.14	0.04	-67.3125	-67.2438	-67.2937	-67.2188	-67.0188	-67.1687	-67.1844	-66.9781	-67.0656	-67.3688	-66.8938	-67.3719	-66.8625
		-0.14	0.06	-66.05	-65.9594	-65.975	-65.8781	-65.7094	-65.9125	-65.9125	-65.7625	-65.8187	-66.0844	-65.65	-66.175	-65.5906
		-0.14	0.08	-65.2188	-64.9187	-65.0844	-64.95	-64.8375	-64.9844	-64.9531	-64.8812	-64.8531	-65.1562	-64.6969	-65.1906	-64.6687
		-0.14	0.1	-64.55	-64.2688	-64.4344	-64.3438	-64.2875	-64.2625	-64.3688	-64.2562	-64.2906	-64.5219	-64.0156	-64.6188	-64.0437
		-0.14	0.12	-64.075	-63.8563	-63.9594	-63.9062	-63.7969	-63.8812	-63.8906	-63.7094	-63.8469	-64	-63.5969	-64.0719	-63.5719
		-0.14	0.14	-63.8	-63.5312	-63.5687	-63.5	-63.4344	-63.65	-63.5312	-63.4344	-63.5719	-63.75	-63.3312	-63.7375	-63.2938
		-0.14	0.16	-63.6	-63.275	-63.3906	-63.2719	-63.2344	-63.3937	-63.3656	-63.275	-63.3031	-63.5156	-63.025	-63.6594	-63.0594
		-0.14	0.18	-63.3719	-63.0938	-63.2938	-63.1906	-63.1094	-63.1937	-63.2406	-63.075	-63.1594	-63.3656	-62.9125	-63.3844	-62.875
		-0.14	0.2	-63.2625	-62.9625	-63.1562	-63.05	-62.9625	-63.1344	-63.1	-62.975	-63.0812	-63.2	-62.85	-63.2812	-62.8094
		-0.14	0.22	-63.2281	-62.9219	-63.0406	-62.9125	-62.8375	-63.0531	-62.975	-62.9	-62.9156	-63.1875	-62.7219	-63.2313	-62.6406
		-0.14	0.24	-63.1125	-62.8	-63.0062	-62.9125	-62.7938	-62.9375	-62.9969	-62.7812	-62.8469	-63.0469	-62.6188	-63.15	-62.6031
		-0.14	0.26	-63.025	-62.7656	-62.9969	-62.8375	-62.7781	-62.8594	-62.95	-62.6875	-62.7938	-62.95	-62.6781	-63.1125	-62.5469
		-0.14	0.28	-62.95	-62.7219	-62.85	-62.8	-62.6813	-62.8125	-62.8375	-62.6312	-62.6813	-62.9313	-62.5625	-63.0969	-62.45
		-0.14	0.3	-62.9344	-62.7	-62.8031	-62.7094	-62.7156	-62.7375	-62.8531	-62.6531	-62.675	-62.8656	-62.5	-63.05	-62.4313
		-0.14	0.32	-62.9375	-62.7281	-62.8	-62.6688	-62.6312	-62.6344	-62.8281	-62.5563	-62.6094	-62.8125	-62.45	-62.95	-62.425
		-0.14	0.34	-62.9	-62.6406	-62.7219	-62.5938	-62.6125	-62.6688	-62.7875	-62.5344	-62.5719	-62.85	-62.4688	-62.9781	-62.3094
		-0.14	0.36	-62.825	-62.5969	-62.7281	-62.6063	-62.5938	-62.7062	-62.6906	-62.4938	-62.6188	-62.7875	-62.4	-62.9531	-62.3
		-0.14	0.38	-62.825	-62.7	-62.75	-62.6188	-62.5875	-62.7031	-62.675	-62.475	-62.6375	-62.7094	-62.3	-62.8844	-62.325
		-0.14	0.4	-62.8063	-62.5812	-62.7	-62.5906	-62.55	-62.5781	-62.6937	-62.4344	-62.5531	-62.7375	-62.3969	-62.9	-62.2438
		-0.14	0.42	-62.7281	-62.5687	-62.6469	-62.525	-62.4938	-62.6063	-62.6469	-62.4562	-62.5438	-62.6813	-62.3875	-62.8875	-62.1625
		-0.14	0.44	-62.7188	-62.6	-62.6937	-62.5438	-62.5125	-62.625	-62.6125	-62.5187	-62.5125	-62.65	-62.2875	-62.8625	-62.1125
		-0.14	0.46	-62.7344	-62.5375	-62.7125	-62.5406	-62.525	-62.5969	-62.7469	-62.4562	-62.5187	-62.6719	-62.3312	-62.8281	-62.0844
		-0.14	0.48	-62.7219	-62.5031	-62.6625	-62.4	-62.4719	-62.5687	-62.7562	-62.4	-62.4469	-62.6875	-62.3688	-62.8094	-61.9625
		-0.14	0.5	-62.7906	-62.4969	-62.6	-62.4	-62.4625	-62.5812	-62.6688	-62.4344	-62.55	-62.6375	-62.2406	-62.75	-61.8125
		-0.14	0.52	-62.75	-62.5156	-62.6375	-62.4313	-62.525	-62.5062	-62.6656	-62.3906	-62.4688	-62.65	-62.25	-62.7406	-61.7844
		-0.14	0.54	-62.6719	-62.4531	-62.6594	-62.475	-62.4969	-62.5219	-62.7	-62.3406	-62.45	-62.7125	-62.3063	-62.8375	-61.6375
		-0.14	0.56	-62.6937	-62.4594	-62.6	-62.4313	-62.4437	-62.55	-62.7031	-62.3656	-62.4594	-62.6656	-62.3	-62.8187	-61.5125
		-0.14	0.58	-62.6656	-62.4813	-62.6344	-62.4375	-62.4125	-62.6	-62.6937	-62.4094	-62.4313	-62.6219	-62.2125	-62.7562	-61.4594
		-0.14	0.6	-62.6688	-62.4344	-62.675	-62.4344	-62.4875	-62.5281	-62.6656	-62.425	-62.45	-62.6594	-62.2531	-62.8281	-61.5187
		-0.14	0.62	-62.6625	-62.4594	-62.6156	-62.3969	-62.4437	-62.55	-62.7	-62.3937	-62.5187	-62.5812	-62.3375	-62.8	-61.4062
		-0.14	0.64	-62.7313	-62.4625	-62.6125	-62.4	-62.4125	-62.5469	-62.6375	-62.3937	-62.525	-62.6281	-62.2438	-62.7562	-61.4344
		-0.14	0.66	-62.7	-62.4531	-62.6437	-62.4375	-62.4344	-62.5406	-62.5375	-62.4625	-62.4625	-62.625	-62.3125	-62.7812	-61.4281
		-0.14	0.68	-62.5938	-62.5625	-62.65	-62.4	-62.425	-62.5281	-62.5938	-62.3719	-62.5187	-62.475	-62.2812	-62.7781	-61.3344
		-0.14	0.7	-62.575	-62.5656	-62.5156	-62.2875	-62.3375	-62.5719	-62.4969	-62.2906	-62.4656	-62.3281	-62.2531	-62.725	-61.325
		-0.14	0.72	-62.4875	-62.5094	-62.5656	-62.2375	-62.325	-62.5	-62.2969	-62.2375	-62.3312	-62.1969	-62.175	-62.7062	-61.3063
		-0.14	0.74	-62.3219	-62.5187	-62.5969	-62.1625	-62.3531	-62.4	-62.1625	-62.2938	-62.3281	-61.9562	-62.1844	-62.7281	-61.3375
		-0.14	0.76	-62.2469	-62.5031	-62.5469	-61.9	-62.3563	-62.2438	-62.05	-62.2938	-62.2219	-61.7969	-62.1813	-62.6063	-61.2719
		-0.14	0.78	-62.1281	-62.5094	-62.4813	-61.6813	-62.2906	-62.1063	-61.75	-62.2406	-62.0187	-61.6906	-62.1	-62.4625	-61.2969
		-0.14	0.8	-61.9625	-62.5406	-62.5469	-61.5219	-62.2406	-61.9625	-61.5875	-62.1875	-61.9906	-61.525	-62.0812	-62.3625	-61.3312
		-0.14	0.82	-61.9125	-62.4531	-62.5312	-61.2094	-62.2219	-61.7531	-61.4375	-62.1469	-61.7156	-61.3469	-62.0875	-62.175	-61.2313
		-0.14	0.84	-61.7938	-62.3719	-62.375	-60.8812	-62.0062	-61.5406	-61.25	-62.0469	-61.4781	-61.2781	-61.9656	-61.85	-61.1281
		-0.14	0.86	-61.6312	-62.3344	-62.2438	-60.6562	-61.7344	-61.3156	-60.9469	-62	-61.2188	-61.0719	-61.8063	-61.7188	-61.125
		-0.14	0.88	-61.5875	-62.1094	-62.225	-60.3594	-61.5719	-61.0844	-60.7062	-61.9813	-60.9	-60.8281	-61.6406	-61.3812	-61
		-0.14	0.9	-61.3937	-61.8531	-62.1031	-59.9625	-61.2594	-60.8312	-60.3937	-61.7531	-60.525	-60.6656	-61.3625	-61.0312	-60.8844
		-0.14	0.92	-61.0187	-61.5656	-61.7687	-59.5469	-60.7969	-60.5594	-60.0062	-61.4156	-60.0406	-60.3219	-60.9844	-60.7625	-60.7687
		-0.14	0.94	-60.675	-61.0219	-61.3906	-59.1125	-60.3469	-60.1	-59.5375	-61.0469	-59.4813	-59.8969	-60.4219	-60.2969	-60.4594
		-0.14	0.96	-60.275	-60.45	-60.8375	-58.6094	-59.8125	-59.4531	-58.9375	-60.5125	-58.7156	-59.35	-59.7313	-59.6844	-59.925
		-0.14	0.98	-59.6437	-59.7281	-60.1937	-57.8625	-59.1156	-58.7	-58.0844	-59.8344	-57.9906	-58.5531	-58.8375	-59.05	-59.2656
		-0.14	1	-58.8688	-58.7344	-59.2469	-57.0812	-58.3531	-57.8594	-57.05	-58.9031	-57.1844	-57.5656	-57.7781	-58.1781	-58.4938
		-0.14	1.02	-58.15	-57.7469	-58.2781	-56.2812	-57.5625	-56.8812	-56.0656	-57.8781	-56.1562	-56.6188	-56.6594	-57.1594	-57.4656
		-0.14	1.04	-57.2594	-56.6437	-57.2313	-55.2375	-56.85	-55.7062	-54.9531	-56.7594	-55.0375	-55.5094	-55.45	-56.0875	-56.3688
		-0.14	1.06	-56.2125	-55.4344	-56	-54.0812	-55.9562	-54.5781	-53.7	-55.4906	-53.8844	-54.2687	-54.0875	-55.0281	-55.2656
		-0.14	1.08	-55.3156	-54.1437	-54.6813	-52.875	-54.9938	-53.4031	-52.4906	-54.3219	-52.5406	-52.9719	-52.5844	-53.8625	-54.1375
		-0.14	1.1	-54.3781	-52.9125	-53.4531	-51.525	-54.0406	-52.1625	-51.1562	-53.2594	-51.4781	-51.725	-51.1625	-52.75	-52.9531
		-0.14	1.12	-53.4594	-51.6781	-52.1312	-50.1437	-53.0031	-51.0906	-49.7562	-52.2562	-50.2438	-50.4	-49.7188	-51.8063	-51.9625
		-0.14	1.14	-52.7969	-50.525	-51.0031	-48.8937	-52.0031	-50	-48.5625	-51.375	-49.175	-49.2875	-48.3156	-50.925	-51.0844
		-0.14	1.16	-52.2344	-49.4594	-50.0594	-47.65	-51.0469	-48.9625	-47.2406	-50.6344	-47.9656	-48.1875	-46.7812	-50.0469	-50.25
		-0.14	1.18	-51.7062	-48.4188	-49.0719	-46.1469	-50.2438	-47.85	-45.3844	-49.9531	-46.4313	-46.9562	-44.5406	-49.4625	-49.5
		-0.14	1.2	-51.4094	-47.2562	-48.2062	-43.8969	-49.45	-46.2344	-42.55	-49.225	-43.8937	-45.0406	-41.0125	-48.85	-48.8406
		-0.14	1.22	-51.1437	-45.2594	-47.1281	-40.3312	-48.7562	-43.4531	-38.2687	-48.5687	-39.8937	-41.9219	-35.95	-48.0625	-48.1719
		-0.14	1.24	-50.8969	-41.95	-45.3375	-35.3125	-48.0781	-39.3563	-32.3812	-47.7844	-34.5469	-37.3312	-29.2719	-46.7375	-47.05
		-0.14	1.26	-50.8	-37.35	-42.2	-28.3813	-47.0312	-33.6469	-24.5688	-46.1125	-27.35	-31.1812	-20.2313	-44.3688	-45.1281
		-0.14	1.28	-50.7156	-30.9906	-37.6344	-19.325	-45.1063	-26.175	-14.4125	-43.2281	-17.7219	-22.9844	-9.31563	-40.5625	-41.8937
		-0.14	1.3	-50.65	-22.4844	-31.5875	-8.54375	-41.7687	-16.4031	-3.39375	-38.9813	-6.7875	-12.5344	1.33438	-35.4344	-37.1969
		-0.14	1.32	-50.575	-11.9156	-23.4062	2.05	-37.1906	-5.36875	6.3	-33.5187	3.425	-1.61563	9.94375	-28.6781	-30.9719
		-0.14	1.34	-50.65	-0.915625	-13.0156	10.5844	-31.0406	4.775	13.4062	-26.0656	11.4812	7.68125	15.4344	-19.5625	-22.7281
		-0.14	1.36	-50.5656	8.27188	-2.09375	15.7906	-22.6688	12.3969	16.9344	-16.3687	16.0875	14.2437	17.2125	-8.80625	-12.1687
		-0.14	1.38	-50.65	14.6313	7.35	17.2531	-12.2437	16.6531	16.7437	-5.5125	16.95	17.1656	15.2063	1.54375	-1.34375
		-0.14	1.4	-50.8	17.3219	14.0656	15.1438	-1.48125	17.1719	13.1094	4.55	14.325	16.3125	10.2188	10.0219	7.85
		-0.14	1.42	-50.8	16.1406	17.3156	10.0813	7.8	14.0469	6.9875	12.2344	8.825	11.9625	3.25	15.3687	14.2312
		-0.14	1.44	-50.8563	11.7406	16.6938	2.875	14.2594	8.26562	-0.7875	16.5281	1.36875	5.2625	-4.9625	16.9656	17.1219
		-0.14	1.46	-51.375	5.02187	12.6625	-5.475	17.1781	0.7625	-9.35938	16.9344	-7.00938	-2.6375	-13.7719	14.9875	16.2156
		-0.14	1.48	-51.5187	-3.06875	6.34375	-14.25	16.3	-7.79688	-18.1469	13.8375	-15.775	-11.3875	-22.4813	10.0375	11.8969
		-0.14	1.5	-51.6562	-11.8062	-1.62188	-23.0312	12.15	-16.7125	-26.7	8.09688	-24.3687	-20.15	-30.5875	3.0125	5.275
		-0.14	1.52	-52.0281	-20.4312	-10.4156	-31.1812	5.57188	-25.4031	-34.3312	0.55625	-32.2219	-28.5125	-37.7344	-5.30625	-2.76562
		-0.14	1.54	-52.2125	-28.7969	-19.3844	-38.2781	-2.56562	-33.1906	-40.9531	-8.03438	-39.1312	-36.1063	-43.7812	-14.0719	-11.5781
		-0.14	1.56	-52.5031	-36.25	-27.8031	-44.1688	-11.2688	-40	-46.5125	-16.8156	-44.9625	-42.4375	-48.7438	-22.6594	-20.5125
		-0.14	1.58	-52.7313	-42.6063	-35.2781	-49.0469	-20.0531	-45.7625	-50.9188	-25.3531	-49.7125	-47.7188	-52.725	-30.7437	-28.8094
		-0.14	1.6	-53.0312	-47.85	-41.7719	-52.9531	-28.4688	-50.3625	-54.4969	-33.175	-53.4313	-51.9906	-55.8625	-37.8969	-36.2844
		-0.14	1.62	-53.3469	-52.0687	-47.1625	-56.0187	-36.0719	-54.0375	-57.3187	-39.9719	-56.4813	-55.325	-58.3875	-43.8875	-42.6531
		-0.14	1.64	-53.5844	-55.3688	-51.4344	-58.4344	-42.3937	-56.95	-59.3781	-45.6031	-58.8844	-57.9	-60.1813	-48.8469	-47.8063
		-0.14	1.66	-53.9281	-58.0125	-54.8937	-60.2406	-47.6094	-59.2313	-61.0344	-50.1969	-60.6406	-59.9875	-61.6156	-52.8156	-51.9719
		-0.14	1.68	-54.1125	-59.9625	-57.6469	-61.6437	-51.8937	-61.0062	-62.3344	-53.8844	-62	-61.5	-62.7062	-55.9313	-55.325
		-0.14	1.7	-54.3469	-61.5187	-59.7375	-62.725	-55.3187	-62.275	-63.2281	-56.6969	-63.1469	-62.6375	-63.3937	-58.375	-57.8594
		-0.14	1.72	-54.5844	-62.7313	-61.2687	-63.525	-57.7781	-63.225	-63.9656	-58.9781	-63.8625	-63.575	-63.8531	-60.3563	-59.8375
		-0.14	1.74	-54.7844	-63.5469	-62.5594	-64.0625	-59.825	-63.9281	-64.4563	-60.75	-64.3844	-64.2625	-64.25	-61.825	-61.2562
		-0.14	1.76	-54.9344	-64.1188	-63.5125	-64.4594	-61.4125	-64.4031	-64.8125	-62.025	-64.7656	-64.6687	-64.525	-62.8312	-62.4719
		-0.14	1.78	-55.1562	-64.6062	-64.2	-64.7219	-62.6375	-64.7781	-65.2125	-63.025	-65.0312	-65.0969	-64.625	-63.6906	-63.3531
		-0.14	1.8	-55.3781	-64.9	-64.675	-65.0375	-63.475	-65.0938	-65.3625	-63.775	-65.1219	-65.325	-64.6438	-64.2781	-63.9188
		-0.14	1.82	-55.5312	-65.1156	-65.0781	-65.0938	-64.125	-65.225	-65.4313	-64.4031	-65.25	-65.4437	-64.6625	-64.65	-64.4094
		-0.14	1.84	-55.7156	-65.2375	-65.3719	-65.1281	-64.7375	-65.3344	-65.5219	-64.75	-65.3063	-65.5094	-64.6188	-65	-64.7937
		-0.14	1.86	-56.05	-65.2812	-65.4969	-65.1438	-65.0437	-65.4906	-65.5906	-65.0563	-65.2812	-65.6219	-64.55	-65.1906	-65.0469
		-0.14	1.88	-56.225	-65.25	-65.625	-65.1969	-65.1906	-65.5	-65.6031	-65.2625	-65.2875	-65.5875	-64.5094	-65.3438	-65.1875
		-0.14	1.9	-56.3906	-65.3281	-65.7719	-65.1906	-65.3844	-65.4656	-65.6062	-65.3688	-65.2906	-65.5906	-64.5094	-65.4688	-65.2906
		-0.14	1.92	-56.6562	-65.2281	-65.8375	-65.1438	-65.5406	-65.5031	-65.5469	-65.4844	-65.2094	-65.6406	-64.3969	-65.5594	-65.3375
		-0.14	1.94	-56.85	-65.2125	-65.8063	-65.125	-65.5156	-65.5625	-65.6094	-65.5906	-65.0969	-65.6312	-64.2469	-65.5656	-65.2937
		-0.14	1.96	-56.9562	-65.1937	-65.8906	-65.0687	-65.5312	-65.4938	-65.5844	-65.5469	-65.1813	-65.5625	-64.2875	-65.5219	-65.2344
		-0.14	1.98	-57.2844	-65.0813	-65.875	-64.9531	-65.6594	-65.4781	-65.4563	-65.6	-65.1031	-65.5625	-64.2344	-65.5656	-65.2844
		-0.14	2	-57.4656	-65.0469	-65.8719	-64.9094	-65.6062	-65.4156	-65.5219	-65.6312	-65.025	-65.5062	-64.1125	-65.5781	-65.2469
		-0.14	2.02	-57.6312	-65.0563	-65.8094	-64.9344	-65.5437	-65.4	-65.4625	-65.5656	-65.05	-65.475	-64.1	-65.4906	-65.1312
		-0.14	2.04	-57.85	-64.9531	-65.7656	-64.9031	-65.5094	-65.3688	-65.4375	-65.6312	-65.05	-65.4625	-64.125	-65.4563	-65.2031
		-0.14	2.06	-58.0563	-64.9563	-65.7562	-64.8063	-65.4719	-65.4563	-65.4656	-65.6562	-64.9594	-65.4719	-64.0719	-65.4625	-65.1687
		-0.14	2.08	-58.1906	-64.975	-65.7	-64.7594	-65.4313	-65.4219	-65.3719	-65.625	-64.925	-65.3875	-64.0781	-65.4938	-65.0156
		-0.14	2.1	-58.4562	-64.9094	-65.6562	-64.7375	-65.3938	-65.3344	-65.3094	-65.625	-64.9156	-65.3844	-64.1719	-65.4594	-65.0625
		-0.14	2.12	-58.6125	-64.9563	-65.6344	-64.7281	-65.3125	-65.3406	-65.35	-65.6531	-64.9187	-65.425	-64.2406	-65.4062	-65.05
		-0.14	2.14	-58.7969	-64.9344	-65.5563	-64.7	-65.35	-65.3219	-65.3187	-65.6	-64.9375	-65.3187	-64.2063	-65.425	-65.0594
		-0.14	2.16	-58.9281	-64.9344	-65.5	-64.7688	-65.2688	-65.2937	-65.375	-65.5563	-64.9688	-65.3094	-64.1969	-65.3969	-64.8906
		-0.14	2.18	-59.2062	-64.925	-65.5469	-64.7937	-65.2	-65.25	-65.375	-65.5406	-64.9719	-65.3625	-64.2875	-65.4375	-64.9187
		-0.14	2.2	-59.3281	-64.9719	-65.5156	-64.7188	-65.2438	-65.2906	-65.3562	-65.4594	-64.9656	-65.3375	-64.2812	-65.4875	-64.9469
		-0.14	2.22	-59.4062	-64.9187	-65.475	-64.7406	-65.175	-65.2844	-65.375	-65.4844	-64.975	-65.3156	-64.2937	-65.4469	-64.9
		-0.14	2.24	-59.6594	-64.95	-65.4344	-64.7656	-65.0563	-65.2844	-65.3594	-65.5062	-65.025	-65.4	-64.2562	-65.3875	-64.875
		-0.14	2.26	-59.8281	-64.9906	-65.4625	-64.7375	-65.0188	-65.3875	-65.3781	-65.4375	-64.9563	-65.4062	-64.2719	-65.4469	-64.9219
		-0.14	2.28	-59.8969	-64.9344	-65.4469	-64.7375	-65.0844	-65.3781	-65.4469	-65.4375	-64.9844	-65.3562	-64.3	-65.4469	-64.9688
		-0.14	2.3	-60.0719	-65.0281	-65.3969	-64.7656	-65.0469	-65.3625	-65.4625	-65.5	-65.0844	-65.4375	-64.2688	-65.4	-64.9938
		-0.14	2.32	-60.2875	-65.1	-65.4344	-64.825	-64.9688	-65.4406	-65.425	-65.45	-65.0094	-65.3812	-64.3812	-65.4344	-65.0062
		-0.14	2.34	-60.3594	-65.0531	-65.5375	-64.7937	-65	-65.3875	-65.4688	-65.4688	-65.0281	-65.3688	-64.4906	-65.4812	-65.0437
		-0.14	2.36	-60.4375	-65.0813	-65.4844	-64.7656	-64.975	-65.4375	-65.4688	-65.4844	-65.1312	-65.3906	-64.5	-65.4187	-64.9906
		-0.14	2.38	-60.6844	-65.125	-65.4281	-64.8125	-64.95	-65.5125	-65.5406	-65.45	-65.1469	-65.3969	-64.5656	-65.3969	-64.975
		-0.14	2.4	-60.7438	-65.0938	-65.4563	-64.825	-65.0031	-65.5312	-65.5844	-65.5531	-65.1531	-65.3906	-64.6	-65.4812	-65.0437
		-0.14	2.42	-60.8594	-65.1	-65.4031	-64.85	-65.0281	-65.5312	-65.6125	-65.5062	-65.1937	-65.475	-64.5719	-65.5188	-65.1062
		-0.14	2.44	-61.0531	-65.1875	-65.4469	-64.9781	-64.9625	-65.65	-65.625	-65.5062	-65.25	-65.5312	-64.5437	-65.5563	-65.0563
		-0.14	2.46	-61.1719	-65.1969	-65.5188	-65.0312	-64.9719	-65.6625	-65.675	-65.5687	-65.2281	-65.5062	-64.5781	-65.5844	-65.0531
		-0.14	2.48	-61.1688	-65.2188	-65.4938	-64.9406	-65.0938	-65.65	-65.6406	-65.5687	-65.3281	-65.4406	-64.7	-65.6156	-65.0969
		-0.14	2.5	-61.3469	-65.3375	-65.4781	-64.9406	-65.0594	-65.6969	-65.6375	-65.5406	-65.3969	-65.575	-64.7125	-65.5281	-65.1188
		-0.14	2.52	-61.5031	-65.2656	-65.4156	-65.0687	-65.0719	-65.7375	-65.6625	-65.5469	-65.4062	-65.5406	-64.7312	-65.5437	-65.1094
		-0.14	2.54	-61.4875	-65.3375	-65.4969	-65.1188	-65.1	-65.775	-65.6594	-65.5938	-65.3688	-65.4625	-64.8438	-65.5875	-65.1656
		-0.14	2.56	-61.6	-65.3469	-65.4688	-65.1094	-65.0687	-65.8313	-65.6906	-65.5563	-65.4375	-65.5656	-64.8875	-65.5687	-65.2
		-0.14	2.58	-61.6875	-65.3063	-65.45	-65.1625	-65.0125	-65.8375	-65.775	-65.6281	-65.4125	-65.6156	-64.9219	-65.6562	-65.1781
		-0.14	2.6	-61.7781	-65.3812	-65.5469	-65.2594	-65.0437	-65.85	-65.7906	-65.5906	-65.4844	-65.6594	-64.9875	-65.6562	-65.1687
		-0.14	2.62	-61.8219	-65.3875	-65.6062	-65.2375	-65.0969	-65.9844	-65.85	-65.6625	-65.5125	-65.6562	-64.9656	-65.7125	-65.2469
		-0.14	2.64	-61.9125	-65.3906	-65.55	-65.2219	-65.15	-65.9812	-65.9344	-65.6844	-65.6625	-65.7625	-64.9313	-65.6719	-65.2562
		-0.14	2.66	-62	-65.4156	-65.6094	-65.275	-65.175	-66.0437	-65.9969	-65.6625	-65.5969	-65.775	-65.0062	-65.7	-65.2344
		-0.14	2.68	-62.0062	-65.475	-65.6312	-65.3	-65.1813	-66.0437	-66.0094	-65.7625	-65.6062	-65.7312	-65.0687	-65.8156	-65.2281
		-0.14	2.7	-62.0938	-65.4375	-65.6312	-65.3094	-65.2312	-66.0062	-65.8844	-65.6781	-65.6531	-65.7812	-65.1031	-65.8406	-65.3406
		-0.14	2.72	-62.225	-65.5188	-65.6312	-65.2844	-65.2625	-66.0375	-65.85	-65.7156	-65.6406	-65.8406	-65.1344	-65.8375	-65.3375
		-0.14	2.74	-62.3156	-65.5375	-65.6594	-65.35	-65.3156	-66.0969	-65.8938	-65.8125	-65.6844	-65.7438	-65.2	-65.8531	-65.3156
		-0.14	2.76	-62.3094	-65.5719	-65.7125	-65.425	-65.2812	-66.0531	-65.9313	-65.7625	-65.7438	-65.825	-65.1906	-65.8969	-65.35
		-0.14	2.78	-62.4	-65.6656	-65.6969	-65.3594	-65.3313	-66.1375	-65.9969	-65.6656	-65.7469	-65.8562	-65.175	-65.85	-65.3875
		-0.14	2.8	-62.4313	-65.775	-65.7438	-65.3313	-65.4281	-66.1281	-65.9875	-65.7312	-65.7281	-65.825	-65.2688	-65.9281	-65.375
		-0.14	2.82	-62.4625	-65.75	-65.7219	-65.4156	-65.4344	-66.1281	-66.0281	-65.7625	-65.8	-65.85	-65.2594	-66.0281	-65.4187
		-0.14	2.84	-62.5156	-65.775	-65.725	-65.525	-65.4281	-66.1844	-66.0156	-65.7469	-65.8406	-65.85	-65.2719	-65.975	-65.4437
		-0.14	2.86	-62.6469	-65.8063	-65.7531	-65.5062	-65.4406	-66.1406	-66.0594	-65.8688	-65.8375	-65.8094	-65.375	-66	-65.4875
		-0.14	2.88	-62.6813	-65.7656	-65.7156	-65.5469	-65.4375	-66.1625	-66.0531	-65.8094	-65.8063	-65.8	-65.3812	-66	-65.45
		-0.14	2.9	-62.6063	-65.8094	-65.7344	-65.5719	-65.4313	-66.25	-66.1	-65.8156	-65.8031	-65.8219	-65.2781	-66.1	-65.4375
		-0.14	2.92	-62.6625	-65.8625	-65.8281	-65.5813	-65.5125	-66.1937	-66.15	-65.8438	-65.8594	-65.9406	-65.3781	-66.05	-65.5
		-0.14	2.94	-62.6875	-65.8562	-65.7937	-65.5813	-65.4531	-66.25	-66.0844	-65.8281	-65.8156	-65.8531	-65.3844	-66.0344	-65.4812
		-0.14	2.96	-62.6344	-65.9219	-65.825	-65.6719	-65.4812	-66.3344	-66.0437	-65.8281	-65.8562	-65.8875	-65.3812	-66.075	-65.475
		-0.14	2.98	-62.6844	-65.9563	-65.9031	-65.675	-65.5281	-66.3	-66.1062	-65.9	-65.9	-65.9875	-65.4375	-66.1	-65.4875
		-0.14	3	-62.8	-65.925	-65.8375	-65.6594	-65.5	-66.3969	-66.125	-65.9	-65.9281	-65.9344	-65.4594	-66.0531	-65.5813
		-0.14	3.02	-62.7438	-65.9938	-65.85	-65.6625	-65.475	-66.4594	-66.1594	-65.9125	-65.9094	-65.9625	-65.4062	-66.0906	-65.55
		-0.14	3.04	-62.7375	-65.9875	-65.9	-65.775	-65.55	-66.3812	-66.1906	-65.9219	-65.9437	-65.9563	-65.4844	-66.1312	-65.5563
		-0.14	3.06	-62.85	-65.9469	-65.7656	-65.7219	-65.5094	-66.3812	-66.1656	-65.8562	-66	-66.0281	-65.5	-66.1125	-65.5844
		-0.14	3.08	-62.8344	-66.0125	-65.8562	-65.7625	-65.5312	-66.4563	-66.1625	-65.9187	-65.9531	-65.9688	-65.4844	-66.1094	-65.6594
		-0.14	3.1	-62.8187	-66.05	-65.925	-65.7656	-65.5969	-66.3594	-66.1656	-65.9125	-65.9187	-65.9781	-65.5	-66.1937	-65.525
		-0.14	3.12	-62.8812	-66.025	-65.875	-65.75	-65.5437	-66.425	-66.1875	-65.9219	-66.0125	-66.0188	-65.575	-66.1562	-65.5719
		-0.14	3.14	-62.9375	-65.9656	-65.9406	-65.7281	-65.6344	-66.4094	-66.2562	-65.9531	-65.9781	-65.9812	-65.5	-66.125	-65.5813
		-0.14	3.16	-62.95	-66.0125	-65.9656	-65.7969	-65.65	-66.3781	-66.3625	-65.9344	-65.9094	-65.9938	-65.5813	-66.2063	-65.6188
		-0.14	3.18	-62.9094	-66.0938	-65.8875	-65.8313	-65.6531	-66.475	-66.3313	-65.9156	-66.0188	-66.0594	-65.6438	-66.2875	-65.5594
		-0.14	3.2	-62.9813	-66.0656	-65.8531	-65.7969	-65.6969	-66.4062	-66.3781	-66.0062	-66.0406	-66.075	-65.5188	-66.3406	-65.6781
		-0.14	3.22	-62.9969	-66.0656	-65.8562	-65.8625	-65.6875	-66.4406	-66.4	-65.9938	-66.0656	-66.0312	-65.6531	-66.2969	-65.7188
		-0.14	3.24	-62.9562	-66.0594	-65.8875	-65.8844	-65.65	-66.4563	-66.3063	-66	-66.0875	-66.0625	-65.6375	-66.2719	-65.7219
		-0.14	3.26	-63.0375	-66.0594	-65.9062	-65.8281	-65.6781	-66.3938	-66.2875	-66.0156	-66.1094	-66.1031	-65.625	-66.3219	-65.6813
		-0.14	3.28	-63.1688	-66.15	-65.9	-65.8375	-65.6719	-66.4031	-66.3219	-65.9406	-66.0875	-66.0687	-65.6438	-66.2469	-65.7562
		-0.14	3.3	-63.1594	-66.1531	-65.875	-65.8844	-65.6312	-66.4094	-66.2875	-65.9563	-66.0156	-66.025	-65.6406	-66.2688	-65.7469
		-0.14	3.32	-63.1	-66.1469	-65.9594	-65.7781	-65.7219	-66.4	-66.3812	-66.05	-66.0625	-66.0969	-65.5687	-66.3438	-65.6625
		-0.14	3.34	-63.1937	-66.1719	-65.9469	-65.8219	-65.6687	-66.4719	-66.3812	-66.0312	-66.1281	-66.0844	-65.6281	-66.35	-65.725
		-0.14	3.36	-63.2094	-66.2094	-65.8406	-65.8406	-65.7281	-66.4344	-66.3094	-65.9781	-66.0844	-66.0969	-65.65	-66.3094	-65.7844
		-0.14	3.38	-63.1469	-66.1656	-65.95	-65.8156	-65.6594	-66.4	-66.35	-66.0344	-66.0687	-66.0875	-65.6156	-66.3219	-65.675
		-0.14	3.4	-63.1594	-66.1937	-65.9281	-65.7969	-65.6562	-66.4219	-66.4062	-65.9969	-66.125	-66.1312	-65.6937	-66.3344	-65.6125
		-0.14	3.42	-63.2188	-66.25	-65.9125	-65.7875	-65.7562	-66.4594	-66.3906	-65.9969	-66.1406	-66.0656	-65.7281	-66.2937	-65.7188
		-0.14	3.44	-63.1719	-66.175	-65.9187	-65.7406	-65.7781	-66.45	-66.3688	-66.0062	-66.0969	-66.1188	-65.7219	-66.3063	-65.7594
		-0.14	3.46	-63.1688	-66.1719	-65.8781	-65.7063	-65.7312	-66.5188	-66.3812	-65.9187	-66.1375	-66.1188	-65.7531	-66.3281	-65.7094
		-0.14	3.48	-63.2875	-66.2094	-65.9688	-65.7812	-65.7937	-66.5062	-66.4187	-65.9625	-66.2094	-66.1	-65.7781	-66.4125	-65.7594
		-0.14	3.5	-63.3	-66.1594	-65.9313	-65.8156	-65.75	-66.4625	-66.4406	-66.0312	-66.1625	-66.0719	-65.7344	-66.3781	-65.7562
		-0.14	3.52	-63.225	-66.2344	-65.9375	-65.8	-65.7125	-66.525	-66.5563	-66.0469	-66.0875	-66.0219	-65.7406	-66.3938	-65.6531
		-0.14	3.54	-63.2656	-66.325	-65.9625	-65.775	-65.7781	-66.5188	-66.5094	-65.9781	-66.0656	-66.0781	-65.7344	-66.4219	-65.7125
		-0.14	3.56	-63.2781	-66.25	-66	-65.7438	-65.75	-66.4281	-66.4938	-66.0312	-66.125	-66.0406	-65.7188	-66.3812	-65.7937
		-0.14	3.58	-63.1688	-66.1687	-65.8969	-65.7625	-65.75	-66.4563	-66.5594	-65.9719	-66.0406	-65.9906	-65.725	-66.3438	-65.7094
		-0.14	3.6	-63.2094	-66.2406	-65.975	-65.8063	-65.7812	-66.4219	-66.5437	-65.8938	-66.0563	-66.0781	-65.6781	-66.4094	-65.7
		-0.14	3.62	-63.2844	-66.2562	-65.9219	-65.7188	-65.8156	-66.4969	-66.4875	-65.9375	-66.0875	-66.0312	-65.75	-66.3969	-65.75
		-0.14	3.64	-63.3	-66.15	-65.8812	-65.7812	-65.775	-66.4812	-66.4719	-65.9469	-66.1562	-65.9688	-65.7312	-66.3031	-65.6875
		-0.14	3.66	-63.1625	-66.2125	-65.9375	-65.8469	-65.7781	-66.4344	-66.4625	-65.9781	-66.0563	-65.9812	-65.7094	-66.3313	-65.7312
		-0.14	3.68	-63.2219	-66.1781	-65.9094	-65.8094	-65.8063	-66.4594	-66.4344	-66.025	-66.075	-66.0687	-65.7906	-66.3938	-65.7562
		-0.14	3.7	-63.2375	-66.1219	-65.9219	-65.7625	-65.8344	-66.4125	-66.5062	-65.9875	-66.1469	-66.0219	-65.8156	-66.3063	-65.7594
		-0.14	3.72	-63.2	-66.2188	-66.0125	-65.7625	-65.7656	-66.4469	-66.4875	-65.9688	-66.0344	-65.9469	-65.7312	-66.2844	-65.675
		-0.14	3.74	-63.1531	-66.0969	-65.8906	-65.75	-65.7562	-66.4563	-66.45	-66.0281	-66.0188	-66.0062	-65.7625	-66.2188	-65.6969
		-0.14	3.76	-63.2406	-66.1188	-65.8688	-65.6906	-65.8281	-66.5094	-66.5125	-65.9938	-66.0594	-66.0219	-65.7562	-66.2438	-65.7094
		-0.14	3.78	-63.25	-66.3219	-65.9688	-65.7906	-65.7688	-66.4594	-66.4688	-65.9062	-66.05	-65.95	-65.7156	-66.2	-65.6594
		-0.14	3.8	-63.1906	-66.15	-65.8969	-65.7562	-65.7344	-66.5094	-66.4187	-66.0219	-65.9906	-65.95	-65.8063	-66.1813	-65.7188
		-0.14	3.82	-63.2812	-66.1062	-65.9313	-65.6969	-65.8063	-66.5	-66.4906	-65.9625	-65.9938	-65.9406	-65.7094	-66.2031	-65.6781
		-0.14	3.84	-63.2625	-66.2219	-65.8938	-65.7937	-65.85	-66.4688	-66.45	-65.8656	-66.0844	-65.9344	-65.7781	-66.2656	-65.6656
		-0.14	3.86	-63.2281	-66.2344	-65.8344	-65.7156	-65.775	-66.475	-66.4125	-65.9875	-66.1	-65.9094	-65.8	-66.25	-65.6781
		-0.14	3.88	-63.2438	-66.25	-65.8688	-65.6875	-65.8625	-66.5437	-66.4938	-65.9563	-66.0563	-65.975	-65.7656	-66.25	-65.7125
		-0.14	3.9	-63.3406	-66.175	-65.8812	-65.7781	-65.8063	-66.4437	-66.5125	-65.9313	-66.0625	-65.9719	-65.7281	-66.2438	-65.6937
		-0.14	3.92	-63.2531	-66.2219	-65.8	-65.7406	-65.7812	-66.45	-66.4875	-65.9437	-66.0781	-65.95	-65.825	-66.2344	-65.7063
		-0.14	3.94	-63.1969	-66.1687	-65.9	-65.75	-65.7937	-66.4375	-66.4812	-65.9313	-65.9906	-65.9594	-65.7125	-66.2188	-65.8
		-0.14	3.96	-63.2375	-66.125	-65.8438	-65.7719	-65.8219	-66.4187	-66.5062	-65.9	-66.0125	-66.0031	-65.7375	-66.1969	-65.7719
		-0.14	3.98	-63.2125	-66.1875	-65.7844	-65.7781	-65.8	-66.4469	-66.4187	-65.9625	-66.0938	-65.9406	-65.7406	-66.2438	-65.7531
		-0.14	4	-63.1531	-66.1156	-65.8281	-65.7937	-65.7562	-66.4719	-66.4906	-65.9594	-66.0312	-65.875	-65.7	-66.2562	-65.6844
		-0.14	4.02	-63.1656	-66.1656	-65.8156	-65.8031	-65.7781	-66.4563	-66.4844	-65.9594	-66.0125	-65.9156	-65.8187	-66.225	-65.6969
		-0.14	4.04	-63.2469	-66.1344	-65.8469	-65.7438	-65.8281	-66.4375	-66.4563	-65.9938	-66.0406	-65.8656	-65.8	-66.2562	-65.7438
		-0.14	4.06	-63.2875	-66.1312	-65.925	-65.7469	-65.8656	-66.4437	-66.5125	-65.9688	-66.0188	-65.9062	-65.7594	-66.2406	-65.7
		-0.14	4.08	-63.1875	-66.1719	-65.8719	-65.7031	-65.7812	-66.3875	-66.4594	-65.875	-65.9969	-65.825	-65.8125	-66.2188	-65.6875
		-0.14	4.1	-63.225	-66.15	-65.7906	-65.6438	-65.8187	-66.4	-66.4	-65.9344	-65.9812	-65.9156	-65.7781	-66.2312	-65.6937
		-0.14	4.12	-63.2219	-66.1687	-65.8344	-65.7031	-65.75	-66.4406	-66.3938	-65.9062	-65.9938	-65.9125	-65.7594	-66.2312	-65.6344
		-0.14	4.14	-63.1719	-66.1188	-65.7531	-65.725	-65.725	-66.4	-66.4344	-65.8406	-66.0219	-65.8406	-65.7781	-66.1969	-65.6344
		-0.14	4.16	-63.1281	-66.1312	-65.8031	-65.6687	-65.7812	-66.4563	-66.375	-65.8906	-65.9531	-65.8719	-65.7562	-66.1531	-65.6531
		-0.14	4.18	-63.2188	-66.1156	-65.7875	-65.7	-65.7594	-66.45	-66.3844	-65.8938	-65.9375	-65.9031	-65.7406	-66.2125	-65.6031
		-0.14	4.2	-63.1875	-66.0813	-65.7562	-65.7	-65.7594	-66.4125	-66.4156	-65.8812	-65.9938	-65.8688	-65.8438	-66.2375	-65.6438
		-0.14	4.22	-63.1063	-66.0938	-65.7781	-65.7594	-65.75	-66.4375	-66.3313	-65.9313	-65.9437	-65.8594	-65.775	-66.1906	-65.7
		-0.14	4.24	-63.1406	-66.175	-65.8406	-65.7375	-65.7375	-66.5	-66.3969	-65.8656	-65.8906	-65.9375	-65.8219	-66.1813	-65.5719
		-0.14	4.26	-63.1688	-66.1	-65.7906	-65.6594	-65.6937	-66.4688	-66.3562	-65.825	-65.85	-65.9219	-65.8	-66.1813	-65.55
		-0.14	4.28	-63.1031	-66.0375	-65.8469	-65.65	-65.7219	-66.4875	-66.25	-65.7844	-65.85	-65.8125	-65.6969	-66.2219	-65.6406
		-0.14	4.3	-63.0844	-66.1562	-65.8469	-65.6594	-65.7031	-66.4812	-66.2562	-65.7844	-65.9187	-65.8812	-65.7312	-66.1	-65.575
		-0.14	4.32	-63.0969	-66.1156	-65.7844	-65.5875	-65.6781	-66.3938	-66.3812	-65.7344	-65.85	-65.875	-65.7781	-66.1687	-65.5437
		-0.14	4.34	-63.1063	-66.0188	-65.8125	-65.6156	-65.7656	-66.5188	-66.45	-65.7312	-65.8719	-65.8344	-65.6469	-66.15	-65.5875
		-0.14	4.36	-63.0687	-66.025	-65.7906	-65.6375	-65.7438	-66.45	-66.1875	-65.75	-65.9062	-65.7656	-65.7344	-66.1625	-65.5219
		-0.14	4.38	-63	-66.0375	-65.775	-65.5844	-65.725	-66.4062	-66.2844	-65.6781	-65.8281	-65.8125	-65.7188	-66.0969	-65.5437
		-0.14	4.4	-63.0719	-66.0125	-65.7812	-65.5563	-65.7812	-66.3875	-66.2312	-65.775	-65.7719	-65.8469	-65.6594	-66.1281	-65.575
		-0.14	4.42	-63.0312	-66.0281	-65.7719	-65.5594	-65.8313	-66.3187	-66.1	-65.7812	-65.8438	-65.75	-65.6406	-66.175	-65.5656
		-0.14	4.44	-63.0344	-66.05	-65.7344	-65.5875	-65.7969	-66.2562	-66.2125	-65.7188	-65.8562	-65.6937	-65.65	-66.0563	-65.5719
		-0.14	4.46	-63.0594	-66	-65.7188	-65.5844	-65.8594	-66.3625	-66.15	-65.75	-65.7844	-65.8	-65.6844	-66.1	-65.5938
		-0.14	4.48	-63.0094	-65.9719	-65.7063	-65.4812	-65.8156	-66.35	-66.2125	-65.7906	-65.7844	-65.7219	-65.6531	-66.1375	-65.4969
		-0.14	4.5	-62.9469	-66.1	-65.6562	-65.5125	-65.7438	-66.3063	-66.2469	-65.7125	-65.7812	-65.7219	-65.6656	-66.0719	-65.5281
		-0.14	4.52	-63.0344	-66.05	-65.6562	-65.5312	-65.825	-66.3812	-66.25	-65.7438	-65.7562	-65.7656	-65.6	-66.0156	-65.5281
		-0.14	4.54	-63.0312	-66.0188	-65.6	-65.5	-65.8313	-66.3656	-66.2312	-65.7844	-65.725	-65.7969	-65.6656	-66	-65.5125
		-0.14	4.56	-62.9938	-66.0375	-65.5563	-65.5219	-65.7781	-66.2688	-66.2469	-65.6656	-65.7656	-65.7156	-65.6375	-66.05	-65.5312
		-0.14	4.58	-63.0125	-66.0813	-65.6094	-65.5687	-65.8125	-66.2969	-66.2531	-65.6312	-65.7531	-65.7125	-65.6	-66.0656	-65.4625
		-0.14	4.6	-63.0438	-66.0219	-65.5656	-65.4406	-65.7281	-66.3562	-66.1781	-65.65	-65.75	-65.8	-65.5594	-66.0469	-65.475
		-0.14	4.62	-62.9344	-66.0062	-65.5125	-65.4844	-65.7312	-66.2625	-66.2625	-65.575	-65.6875	-65.7562	-65.6375	-66.0312	-65.55
		-0.14	4.64	-62.9	-65.9969	-65.5219	-65.4875	-65.7625	-66.3125	-66.2781	-65.6281	-65.6844	-65.75	-65.5938	-66.0281	-65.5
		-0.14	4.66	-62.9188	-65.9344	-65.4781	-65.4531	-65.675	-66.2656	-66.2219	-65.6438	-65.6844	-65.7312	-65.6219	-66.0344	-65.4938
		-0.14	4.68	-62.9656	-65.9781	-65.4094	-65.55	-65.6781	-66.175	-66.1656	-65.55	-65.6156	-65.75	-65.6281	-65.9906	-65.55
		-0.14	4.7	-62.9469	-66.0312	-65.4812	-65.4875	-65.7688	-66.2188	-66.1844	-65.5938	-65.6438	-65.7438	-65.5469	-66.025	-65.5188
		-0.14	4.72	-62.925	-65.9594	-65.475	-65.375	-65.7562	-66.2344	-66.1438	-65.6281	-65.7	-65.6875	-65.6219	-66.0188	-65.525
		-0.14	4.74	-63.0094	-65.9094	-65.4656	-65.425	-65.6844	-66.1438	-66.2	-65.5563	-65.6625	-65.7156	-65.6344	-65.9437	-65.4688
		-0.14	4.76	-63.0062	-65.9281	-65.5406	-65.4	-65.7625	-66.2438	-66.2094	-65.5719	-65.6625	-65.6813	-65.5094	-65.9313	-65.4594
		-0.14	4.78	-62.9219	-65.925	-65.5344	-65.4156	-65.7	-66.2	-66.1656	-65.6156	-65.7344	-65.6188	-65.5125	-65.9563	-65.4781
		-0.14	4.8	-62.9094	-65.8688	-65.4781	-65.4187	-65.6813	-66.1875	-66.0875	-65.5656	-65.6906	-65.5656	-65.5594	-66.0219	-65.4812
		-0.14	4.82	-62.9813	-65.8625	-65.55	-65.3375	-65.65	-66.2094	-66.1719	-65.6656	-65.5969	-65.5906	-65.5563	-65.9125	-65.4187
		-0.14	4.84	-62.95	-65.8844	-65.4812	-65.3594	-65.6781	-66.225	-66.1438	-65.6875	-65.55	-65.6188	-65.5375	-65.8531	-65.4688
		-0.14	4.86	-62.8719	-65.8063	-65.4062	-65.35	-65.6469	-66.1469	-66.1062	-65.5875	-65.575	-65.6031	-65.5125	-65.8656	-65.4875
		-0.14	4.88	-62.9313	-65.7937	-65.4719	-65.3	-65.675	-66.1906	-66.1312	-65.55	-65.6	-65.5969	-65.5188	-65.9	-65.3719
		-0.14	4.9	-62.95	-65.875	-65.4281	-65.35	-65.6062	-66.2281	-66.1062	-65.6156	-65.5469	-65.5938	-65.4656	-65.7969	-65.4187
		-0.14	4.92	-62.8906	-65.8812	-65.3969	-65.3187	-65.5469	-66.1531	-66.1219	-65.5687	-65.6	-65.5594	-65.45	-65.85	-65.4187
		-0.14	4.94	-62.85	-65.8875	-65.425	-65.2781	-65.6062	-66.1344	-66.1813	-65.5375	-65.6781	-65.5625	-65.4	-65.8781	-65.3625
		-0.14	4.96	-62.8937	-65.8469	-65.4062	-65.3531	-65.5781	-66.1	-66.0813	-65.5312	-65.6531	-65.5656	-65.4656	-65.8156	-65.3844
		-0.14	4.98	-62.9031	-65.8063	-65.3187	-65.3094	-65.6062	-66.0875	-66.0687	-65.4375	-65.5781	-65.65	-65.4656	-65.875	-65.325
		-0.04	0	-60.2687	-60.7719	-60.9594	-60.825	-60.7156	-60.9844	-61.975	-61.7719	-61.475	-61.4562	-61.3125	-63.4813	-63.5563	-63.2406	-63.5656	-63.4062	-63.6937	-64.2125	-64.0344	-64.7906	-64.475
		-0.04	0.02	-59.9	-60.45	-60.5906	-60.4875	-60.4594	-60.6906	-61.6188	-61.3594	-61.0344	-61.1	-60.9	-63.1437	-63.25	-62.95	-63.2875	-63.0094	-63.45	-63.9	-63.7156	-64.4344	-64.1625
		-0.04	0.04	-62.4625	-62.8594	-63.1	-62.8563	-62.8438	-63.1437	-63.9719	-63.6937	-63.4313	-63.4	-63.2687	-65.6844	-65.75	-65.5406	-65.8125	-65.5563	-65.7094	-66.2125	-65.95	-66.7344	-66.4094
		-0.04	0.06	-66.5687	-66.9031	-67.1719	-67	-66.95	-67.1687	-68.0938	-67.8	-67.4875	-67.4688	-67.3719	-69.9563	-70.0813	-69.8063	-70.0781	-69.9594	-69.6	-70.15	-69.9	-70.65	-70.3187
		-0.04	0.08	-67.5844	-68.0437	-68.2875	-68.075	-68.0531	-68.3063	-69.2	-68.8938	-68.5687	-68.5625	-68.4437	-71.175	-71.2719	-71.0188	-71.2812	-71.05	-70.8281	-71.2937	-71.1219	-71.775	-71.525
		-0.04	0.1	-67.1	-67.4	-67.7063	-67.4313	-67.4938	-67.7594	-68.6031	-68.35	-67.9938	-67.95	-67.8875	-70.5563	-70.6219	-70.4	-70.6969	-70.35	-70.3656	-70.8125	-70.6	-71.3313	-71.0375
		-0.04	0.12	-65.9594	-66.3438	-66.5656	-66.4062	-66.3406	-66.6188	-67.6312	-67.3875	-67.0875	-66.9563	-66.8531	-69.2781	-69.4313	-69.1188	-69.4531	-69.2	-69.2937	-69.85	-69.5906	-70.3313	-70.0312
		-0.04	0.14	-64.8281	-65.2906	-65.5	-65.4125	-65.3156	-65.5406	-66.55	-66.25	-65.975	-65.9625	-65.8688	-68.0563	-68.2594	-67.8781	-68.225	-68.0094	-68.2344	-68.7344	-68.5719	-69.2406	-68.9844
		-0.04	0.16	-63.9344	-64.3344	-64.5469	-64.425	-64.3812	-64.6156	-65.6031	-65.3063	-65.0219	-64.9844	-64.9938	-67.0875	-67.2219	-66.9094	-67.2375	-66.9375	-67.3438	-67.7937	-67.6438	-68.25	-68.025
		-0.04	0.18	-63.1875	-63.5875	-63.8187	-63.6906	-63.6344	-63.8406	-64.95	-64.6188	-64.3438	-64.2937	-64.2125	-66.2937	-66.3906	-66.0687	-66.375	-66.1906	-66.5625	-67.0906	-66.8438	-67.5719	-67.2375
		-0.04	0.2	-62.5375	-63.0531	-63.2094	-63.1406	-63.1	-63.2375	-64.25	-64	-63.7687	-63.725	-63.6875	-65.6656	-65.8688	-65.4281	-65.7531	-65.6375	-65.9938	-66.5	-66.3063	-66.9187	-66.7063
		-0.04	0.22	-62.0969	-62.5625	-62.8031	-62.6625	-62.65	-62.8281	-63.7844	-63.55	-63.3031	-63.2281	-63.2531	-65.2406	-65.3875	-65.0125	-65.3094	-65.0938	-65.6156	-65.9812	-65.8906	-66.4875	-66.3219
		-0.04	0.24	-61.7719	-62.2031	-62.4688	-62.2719	-62.2313	-62.5219	-63.5625	-63.2281	-62.95	-62.9344	-62.8469	-64.9062	-64.975	-64.7219	-65.0031	-64.75	-65.2656	-65.7188	-65.5406	-66.2	-65.9437
		-0.04	0.26	-61.4594	-62.0125	-62.1063	-62.0656	-61.975	-62.225	-63.2562	-62.9906	-62.7719	-62.7344	-62.6344	-64.6406	-64.7531	-64.4375	-64.7375	-64.5469	-64.9375	-65.4656	-65.2312	-65.8969	-65.6875
		-0.04	0.28	-61.3281	-61.7562	-61.9969	-61.8719	-61.8	-62.0156	-63.0812	-62.7156	-62.5531	-62.4375	-62.4844	-64.4781	-64.525	-64.25	-64.5031	-64.3438	-64.8	-65.2312	-65.0687	-65.7094	-65.5375
		-0.04	0.3	-61.15	-61.5469	-61.8719	-61.6625	-61.5906	-61.9188	-62.9437	-62.6375	-62.3438	-62.2938	-62.1875	-64.3	-64.3781	-64.15	-64.3844	-64.1906	-64.7	-65.1	-64.9469	-65.6594	-65.3906
		-0.04	0.32	-60.9625	-61.5219	-61.7188	-61.55	-61.4875	-61.8375	-62.75	-62.5	-62.2625	-62.2344	-62.0875	-64.1375	-64.3063	-64.0563	-64.2937	-64.1219	-64.5344	-64.9719	-64.8156	-65.5	-65.225
		-0.04	0.34	-60.9656	-61.3969	-61.6531	-61.4906	-61.4062	-61.6437	-62.6625	-62.3312	-62.125	-62.075	-62.0563	-64.1125	-64.2406	-63.9188	-64.1281	-63.9844	-64.4	-64.85	-64.6719	-65.3281	-65.1656
		-0.04	0.36	-60.8812	-61.2687	-61.5969	-61.4125	-61.325	-61.5656	-62.625	-62.2969	-62.025	-61.9437	-61.925	-64.05	-64.1344	-63.7875	-64.0375	-63.875	-64.3844	-64.75	-64.6281	-65.2969	-65.1375
		-0.04	0.38	-60.7469	-61.2281	-61.4625	-61.3531	-61.2406	-61.55	-62.5375	-62.225	-62.0312	-61.9469	-61.825	-63.9406	-64.0813	-63.75	-63.9938	-63.8219	-64.3406	-64.7406	-64.5969	-65.2125	-65.0344
		-0.04	0.4	-60.75	-61.1688	-61.35	-61.3094	-61.2469	-61.4562	-62.4719	-62.1219	-62.025	-61.8281	-61.8	-63.9094	-64	-63.6469	-63.9125	-63.8094	-64.2406	-64.6406	-64.4781	-65.0938	-64.9375
		-0.04	0.42	-60.7094	-61.075	-61.3594	-61.1813	-61.2125	-61.3625	-62.4469	-62.0812	-61.9	-61.8	-61.8156	-63.875	-63.9813	-63.6312	-63.875	-63.7	-64.1813	-64.5719	-64.3781	-65.0781	-64.9156
		-0.04	0.44	-60.625	-61.0906	-61.2844	-61.15	-61.1375	-61.4	-62.3563	-62.0687	-61.8719	-61.7969	-61.7156	-63.8219	-63.9594	-63.6875	-63.8187	-63.6656	-64.1813	-64.6	-64.3656	-65.0563	-64.8781
		-0.04	0.46	-60.5812	-60.9969	-61.2438	-61.1469	-61.1875	-61.35	-62.375	-62.0187	-61.8563	-61.6937	-61.75	-63.8187	-63.9125	-63.5938	-63.8594	-63.7	-64.15	-64.5938	-64.325	-64.9625	-64.7781
		-0.04	0.48	-60.5969	-60.9375	-61.2469	-61.1188	-61.1781	-61.2781	-62.35	-62	-61.7344	-61.6625	-61.7062	-63.8531	-63.8531	-63.5	-63.7812	-63.675	-64.0813	-64.525	-64.2969	-64.9625	-64.7156
		-0.04	0.5	-60.4594	-60.9313	-61.225	-61.0469	-61.0656	-61.2719	-62.2781	-61.9437	-61.7656	-61.6719	-61.6031	-63.7125	-63.9219	-63.4938	-63.6937	-63.5875	-64.0594	-64.5125	-64.3	-64.975	-64.7438
		-0.04	0.52	-60.4625	-60.9344	-61.2062	-61.0594	-61.0375	-61.25	-62.325	-61.8625	-61.7906	-61.65	-61.6156	-63.7	-63.9	-63.4469	-63.725	-63.6281	-64.05	-64.5125	-64.2844	-64.9156	-64.7219
		-0.04	0.54	-60.5469	-60.8688	-61.2031	-61.1063	-61.0687	-61.2531	-62.325	-61.8688	-61.7687	-61.6031	-61.6844	-63.7125	-63.825	-63.4062	-63.7094	-63.6344	-63.9875	-64.4437	-64.2063	-64.8938	-64.6406
		-0.04	0.56	-60.5187	-60.9156	-61.1906	-61.05	-61.0375	-61.1813	-62.3	-61.9344	-61.6875	-61.65	-61.6469	-63.6406	-63.8187	-63.375	-63.6219	-63.5969	-63.9437	-64.425	-64.1719	-64.9563	-64.6562
		-0.04	0.58	-60.4813	-60.9188	-61.1375	-61.0687	-60.9813	-61.1875	-62.2375	-61.8563	-61.7	-61.5938	-61.5438	-63.6469	-63.8156	-63.425	-63.6188	-63.5781	-64.0156	-64.45	-64.2219	-64.8844	-64.6687
		-0.04	0.6	-60.4938	-60.8375	-61.1562	-61.0312	-61.0125	-61.175	-62.2406	-61.85	-61.7	-61.5719	-61.5719	-63.6906	-63.7687	-63.4	-63.675	-63.5812	-63.9906	-64.4281	-64.1656	-64.8594	-64.6344
		-0.04	0.62	-60.45	-60.8656	-61.2062	-60.9813	-60.9437	-61.1656	-62.1844	-61.8812	-61.6813	-61.5844	-61.5781	-63.65	-63.8312	-63.3094	-63.575	-63.5656	-63.9719	-64.3406	-64.15	-64.9219	-64.6156
		-0.04	0.64	-60.4281	-60.9062	-61.1406	-60.9906	-60.8812	-61.0812	-62.2313	-61.8094	-61.6594	-61.5969	-61.55	-63.6469	-63.7719	-63.3625	-63.5719	-63.5438	-64	-64.3969	-64.125	-64.8406	-64.6687
		-0.04	0.66	-60.4594	-60.8469	-61.1031	-61.0438	-60.9531	-61.15	-62.1875	-61.8094	-61.7219	-61.5938	-61.5094	-63.675	-63.725	-63.4375	-63.5312	-63.55	-64.0594	-64.3875	-64.1969	-64.8656	-64.65
		-0.04	0.68	-60.4125	-60.7656	-61.0938	-60.9906	-61.0094	-61.1406	-62.1719	-61.8219	-61.675	-61.5969	-61.6	-63.6219	-63.7812	-63.4375	-63.5094	-63.5	-63.9688	-64.3531	-64.2031	-64.8719	-64.6156
		-0.04	0.7	-60.3937	-60.8156	-61.1094	-60.9188	-60.9125	-61.0687	-62.1813	-61.7687	-61.6219	-61.5906	-61.5687	-63.5906	-63.7313	-63.3906	-63.4219	-63.4437	-63.9938	-64.3375	-64.1469	-64.8469	-64.625
		-0.04	0.72	-60.4625	-60.7938	-61.0281	-60.9313	-60.9469	-61.0156	-62.1906	-61.8031	-61.6281	-61.5625	-61.5375	-63.625	-63.7594	-63.4688	-63.4375	-63.4594	-63.9938	-64.4156	-64.1312	-64.7875	-64.6562
		-0.04	0.74	-60.4469	-60.7344	-61.0656	-60.95	-60.9656	-61.0812	-62.1625	-61.8219	-61.65	-61.625	-61.5875	-63.5687	-63.8063	-63.4	-63.4625	-63.4813	-63.9813	-64.3844	-64.1656	-64.8063	-64.6281
		-0.04	0.76	-60.4188	-60.8	-61.0687	-60.8906	-60.9375	-61.1031	-62.2188	-61.8156	-61.6094	-61.6125	-61.6281	-63.5844	-63.7344	-63.2875	-63.4344	-63.4125	-63.9156	-64.3438	-64.1594	-64.8063	-64.6094
		-0.04	0.78	-60.4375	-60.8187	-61.0156	-60.8937	-60.8688	-61.0406	-62.2156	-61.7969	-61.5406	-61.525	-61.5625	-63.6219	-63.6969	-63.2406	-63.4	-63.4188	-63.9625	-64.3656	-64.1438	-64.7469	-64.65
		-0.04	0.8	-60.4437	-60.7062	-61.0625	-60.9406	-60.8625	-61.075	-62.1281	-61.7906	-61.5312	-61.5656	-61.5656	-63.5687	-63.6375	-63.1969	-63.4156	-63.4625	-63.9344	-64.3844	-64.1281	-64.8063	-64.575
		-0.04	0.82	-60.3375	-60.7906	-61.0969	-60.8469	-60.85	-61.1188	-62.1469	-61.8031	-61.4625	-61.4313	-61.5625	-63.4938	-63.5062	-63.05	-63.3187	-63.4125	-63.7875	-64.3187	-64.1562	-64.75	-64.4719
		-0.04	0.84	-60.2406	-60.7313	-61.0219	-60.8875	-60.8	-61.0031	-62.1156	-61.7094	-61.3156	-61.3438	-61.5469	-63.4969	-63.4688	-62.8656	-63.2094	-63.3406	-63.6594	-64.3313	-64.0969	-64.6687	-64.4094
		-0.04	0.86	-60.1344	-60.5687	-61.0125	-60.9281	-60.8219	-60.9	-61.9813	-61.6906	-61.1344	-61.3	-61.45	-63.4188	-63.3594	-62.75	-63.1375	-63.3	-63.6469	-64.4	-64.1062	-64.6375	-64.3781
		-0.04	0.88	-59.9375	-60.5125	-60.9594	-60.8937	-60.7125	-60.8688	-61.9688	-61.525	-60.8875	-61.15	-61.5281	-63.3688	-63.1094	-62.6094	-62.9875	-63.1937	-63.5531	-64.3094	-64.0719	-64.6	-64.1906
		-0.04	0.9	-59.775	-60.5	-60.8156	-60.825	-60.5406	-60.7812	-61.8781	-61.2687	-60.6094	-60.9375	-61.4906	-63.3094	-62.9844	-62.4094	-62.8031	-63.0812	-63.3875	-64.1687	-64.0219	-64.4187	-64.0844
		-0.04	0.92	-59.6281	-60.2375	-60.7313	-60.7875	-60.4313	-60.6	-61.7188	-61.0563	-60.375	-60.7562	-61.3531	-63.2219	-62.8594	-62.2812	-62.6562	-62.9156	-63.2656	-64.1531	-63.8563	-64.2469	-64
		-0.04	0.94	-59.4188	-60.2875	-60.6625	-60.75	-60.3438	-60.4469	-61.6375	-60.85	-60.1125	-60.6125	-61.3	-63.1	-62.6469	-62.1344	-62.4188	-62.8187	-63.2125	-64.0094	-63.7812	-64.1094	-63.8906
		-0.04	0.96	-59.2	-60.25	-60.5187	-60.6312	-60.0625	-60.375	-61.5031	-60.5875	-59.7438	-60.35	-61.225	-63.0344	-62.4813	-61.9156	-62.1531	-62.625	-63.05	-63.7781	-63.6625	-63.9344	-63.7062
		-0.04	0.98	-58.9344	-60.0938	-60.3219	-60.6	-59.8438	-60.2	-61.3906	-60.3781	-59.4562	-60.1875	-60.9375	-62.85	-62.3281	-61.5563	-61.8844	-62.325	-62.8656	-63.5781	-63.4125	-63.7156	-63.5812
		-0.04	1	-58.6156	-59.9125	-60.1781	-60.5344	-59.6406	-59.9094	-61.175	-60.1625	-59.1781	-59.9781	-60.6969	-62.7438	-62.05	-61.275	-61.5594	-61.9938	-62.7062	-63.3344	-63.1125	-63.55	-63.4844
		-0.04	1.02	-58.3031	-59.8125	-60.0719	-60.3937	-59.4375	-59.6969	-60.975	-59.8594	-58.875	-59.7062	-60.5844	-62.65	-61.85	-60.9156	-61.1312	-61.6969	-62.575	-62.9375	-62.9094	-63.2594	-63.2625
		-0.04	1.04	-58.0312	-59.7906	-59.9	-60.2719	-59.2812	-59.4531	-60.725	-59.7344	-58.6125	-59.5094	-60.4375	-62.4344	-61.3969	-60.4188	-60.7469	-61.2438	-62.2344	-62.4437	-62.5844	-62.85	-63.0156
		-0.04	1.06	-57.6344	-59.575	-59.7687	-60.175	-59.1031	-59.1	-60.5312	-59.5563	-58.4	-59.3063	-60.2	-62.2125	-60.8281	-59.8625	-60.2844	-60.6719	-61.8094	-61.9719	-62.0469	-62.4813	-62.7687
		-0.04	1.08	-57.1625	-59.4938	-59.6969	-59.9531	-58.875	-58.7594	-60.1969	-59.3	-58.1656	-58.9219	-60.0125	-61.9656	-60.225	-59.3219	-59.6344	-60.1094	-61.275	-61.3	-61.4688	-62.0438	-62.45
		-0.04	1.1	-56.7812	-59.3344	-59.3406	-59.575	-58.5938	-58.3469	-59.7844	-59.0281	-57.6781	-58.5	-59.6344	-61.6	-59.5062	-58.6063	-59.0844	-59.4094	-60.6156	-60.55	-60.7625	-61.5438	-61.9813
		-0.04	1.12	-56.3	-58.9625	-58.8469	-59.175	-58.2531	-57.7094	-59.3844	-58.6406	-57.1844	-57.9156	-59.1688	-61.2469	-58.6688	-57.8187	-58.3563	-58.675	-59.7719	-59.8	-59.9406	-60.9656	-61.5625
		-0.04	1.14	-55.75	-58.5406	-58.2094	-58.6937	-57.9656	-57.0719	-58.8375	-57.9844	-56.6562	-57.1688	-58.6344	-60.6688	-57.9594	-57.0281	-57.5156	-57.9531	-58.8875	-58.9781	-59.1	-60.4437	-61.1188
		-0.04	1.16	-55.2156	-58.0031	-57.4313	-57.9688	-57.4562	-56.3281	-58.2594	-57.3344	-55.9094	-56.2844	-58.0625	-59.9	-57.1781	-56.0563	-56.7469	-57.2594	-58.0219	-58.0594	-58.3594	-59.9594	-60.5375
		-0.04	1.18	-54.6719	-57.3219	-56.3844	-57.3125	-56.9188	-55.5344	-57.6594	-56.675	-55.1188	-55.4656	-57.2625	-59.0125	-56.3594	-54.9406	-55.8906	-56.5406	-56.95	-57.2062	-57.5094	-59.2531	-59.9156
		-0.04	1.2	-54.025	-56.5312	-55.3844	-56.6469	-56.4062	-54.6094	-57.0438	-55.9344	-54.325	-54.4844	-56.4844	-58.0281	-55.6188	-53.9125	-55.0344	-55.8094	-55.8469	-56.3312	-56.6937	-58.7	-59.2969
		-0.04	1.22	-53.4	-55.75	-54.4281	-55.75	-55.8594	-53.675	-56.35	-55.1094	-53.4437	-53.5687	-55.7594	-57.0187	-54.7875	-52.9344	-54.3344	-55.2188	-54.7625	-55.4281	-55.9219	-58.075	-58.6312
		-0.04	1.24	-52.8344	-54.9844	-53.3094	-54.7969	-55.225	-52.7844	-55.7781	-54.375	-52.4906	-52.7438	-54.95	-56.1219	-54.1	-52.0094	-53.5875	-54.6281	-53.6531	-54.5469	-55.0781	-57.425	-57.8187
		-0.04	1.26	-52.1188	-54.0812	-52.2719	-54.0281	-54.6937	-51.9688	-55.0719	-53.6531	-51.6031	-51.8875	-54.1531	-55.1594	-53.4656	-51.05	-52.8469	-53.9656	-52.4969	-53.8469	-54.2375	-56.9719	-57.1094
		-0.04	1.28	-51.4719	-53.2781	-51.3187	-53.1469	-54.1656	-51.0938	-54.4281	-52.8187	-50.7594	-51.05	-53.475	-54.425	-52.7969	-50.2031	-52.25	-53.4906	-51.3625	-53.1562	-53.4688	-56.3937	-56.4437
		-0.04	1.3	-50.9562	-52.4531	-50.35	-52.1562	-53.4938	-50.3125	-53.8219	-52.3187	-49.8094	-50.3469	-52.7938	-53.8344	-52.2062	-49.5625	-51.7156	-53.0219	-50.35	-52.5	-52.7125	-55.85	-55.7062
		-0.04	1.32	-50.3219	-51.5719	-49.4	-51.3406	-52.8125	-49.6719	-53.125	-51.9375	-48.7969	-49.5438	-52.1	-53.1937	-51.7062	-48.8875	-51.2562	-52.5438	-49.3438	-51.9688	-51.9594	-55.4844	-55.0656
		-0.04	1.34	-49.7125	-50.85	-48.5	-50.6281	-52.3	-48.8781	-52.5312	-51.2656	-47.35	-48.4313	-51.45	-52.7188	-51.2	-48.2344	-50.925	-52.0625	-48.0406	-51.6094	-51.2719	-55.0406	-54.4938
		-0.04	1.36	-49.2562	-50.2156	-47.5594	-49.8844	-51.7156	-48.0656	-51.9844	-50.975	-44.8	-46.6813	-50.8875	-52.325	-50.9844	-47.4844	-50.6344	-51.7687	-46.1656	-51.1875	-50.5406	-54.6656	-53.9656
		-0.04	1.38	-48.6688	-49.5812	-46.0375	-49.2438	-51.05	-46.8906	-51.4469	-50.6437	-41.1	-43.7938	-50.225	-51.9688	-50.7094	-46.0219	-50.375	-51.5187	-43.2438	-50.75	-49.7969	-54.4781	-53.4437
		-0.04	1.4	-48	-48.9656	-43.5594	-48.675	-50.5281	-44.9156	-50.9375	-50.2687	-36.0187	-39.5438	-49.4969	-51.6656	-50.3875	-43.35	-50.2	-51.2531	-39.0656	-50.4656	-48.9688	-54.2812	-53.0281
		-0.04	1.42	-47.0844	-48.4	-40.0094	-47.9719	-50.05	-41.6469	-50.5656	-50.0344	-29.0438	-33.8875	-48.8688	-51.4437	-50.2594	-39.4469	-50.0438	-50.9781	-33.1906	-50.0094	-47.4219	-54.0125	-52.7438
		-0.04	1.44	-45.3063	-47.6094	-35.0375	-46.7812	-49.6344	-37.2188	-50.1156	-49.7219	-20.1406	-26.2719	-47.8281	-51.1813	-50.0812	-34.1281	-49.9188	-50.8656	-25.3594	-48.9531	-44.7812	-53.8969	-52.4375
		-0.04	1.46	-42.1125	-46.1063	-28.1938	-44.6125	-49.15	-31.175	-49.6594	-49.3625	-10.6375	-16.9594	-45.825	-51.0781	-49.8906	-26.7031	-49.9719	-50.6813	-15.9656	-47.05	-41.0625	-53.7906	-52.1844
		-0.04	1.48	-38.0625	-43.6219	-19.5531	-41.3219	-48.8375	-23.1375	-49.3063	-48.3937	-2.1875	-7.65	-42.6969	-51.0312	-49.8563	-17.1156	-49.8844	-50.55	-6.53438	-44.0125	-35.9688	-53.6	-51.9813
		-0.04	1.5	-32.5719	-39.9938	-10.1531	-36.7469	-48.4375	-13.7781	-48.725	-46.6656	4.40625	0.325	-38.3906	-50.875	-49.8094	-6.85313	-49.8406	-50.4875	1.54062	-39.7062	-28.9438	-53.5656	-51.8656
		-0.04	1.52	-24.7062	-34.8781	-1.44062	-30.6375	-47.9437	-4.75	-47.675	-43.6969	8.15938	5.97813	-32.35	-50.8312	-49.725	2.41563	-49.9156	-50.3281	7.1	-34.0312	-20.0344	-53.5687	-51.7438
		-0.04	1.54	-15.5688	-28.0781	5.39687	-22.6156	-47.0312	2.70312	-45.75	-39.5219	8.77188	8.57812	-24.3125	-50.7938	-49.7656	9.34688	-49.9406	-50.1156	9.55313	-26.4312	-10.3844	-53.5	-51.5844
		-0.04	1.56	-6.28125	-19.3813	9.45312	-13.3438	-45.2344	7.75	-42.5687	-33.9781	6.675	8.23438	-15.1	-50.7094	-49.8094	13.0281	-50.0719	-50.0656	9.10938	-17.225	-1.5625	-53.4875	-51.4844
		-0.04	1.58	1.88437	-9.97812	10.4688	-4.29688	-42.2938	9.925	-38.1937	-26.45	2.6375	5.4625	-6.05937	-50.7687	-49.8094	13.2281	-50.2469	-50	6.15312	-7.68125	5.20625	-53.5281	-51.475
		-0.04	1.6	7.75	-1.35	8.725	3.1	-38.1594	9.15312	-32.2531	-17.2656	-2.95312	0.778125	1.5	-50.8219	-49.8656	10.3188	-50.325	-49.8375	1.24063	0.609375	9.0625	-53.5687	-51.4219
		-0.04	1.62	10.65	5.24062	4.65938	8.11875	-32.6625	5.88125	-24.2531	-8.00313	-9.50313	-5.2875	6.5875	-50.8344	-49.8969	5.17188	-50.4625	-49.6844	-5.04375	6.575	9.96875	-53.5719	-51.35
		-0.04	1.64	10.5594	9.30313	-1.00937	10.25	-25.1844	0.978125	-14.8813	0.015625	-16.4344	-11.9656	8.63437	-50.9281	-49.9437	-1.55	-50.5938	-49.6156	-11.9812	9.5875	8	-53.6625	-51.4094
		-0.04	1.66	7.85	10.4281	-7.52187	9.40625	-16.075	-5.225	-5.79063	5.88125	-23.2281	-18.7656	7.91563	-50.9844	-50.0438	-9.225	-50.7313	-49.575	-19.1125	9.70312	3.75312	-53.7687	-51.475
		-0.04	1.68	3.09063	8.60938	-14.5656	6.14687	-6.9125	-12.2094	1.8375	8.78125	-29.65	-25.7031	4.75313	-51.0625	-50.1125	-17.1281	-50.95	-49.4188	-26.0906	7.04063	-1.9625	-53.6719	-51.5406
		-0.04	1.7	-2.95312	4.6125	-21.5812	1.175	1.0625	-19.1781	6.95312	8.60938	-35.5062	-31.95	-0.25	-51.2438	-50.1562	-24.7062	-51.1594	-49.3406	-32.4313	2.35	-8.79375	-53.7438	-51.6156
		-0.04	1.72	-9.74375	-0.871875	-28.175	-5.01875	6.95625	-25.7906	9.075	6.075	-40.4531	-37.2656	-6.375	-51.2781	-50.3688	-31.7	-51.275	-49.3281	-37.9813	-3.69062	-16.0156	-53.8063	-51.6937
		-0.04	1.74	-16.9906	-7.45625	-34.0469	-11.9688	9.94063	-31.9688	8.36563	1.51875	-44.7	-42.0812	-13.1094	-51.3906	-50.4875	-37.8312	-51.55	-49.3312	-42.75	-10.6344	-23.0438	-53.8219	-51.8125
		-0.04	1.76	-23.9438	-14.5406	-39.1844	-19.0281	9.90938	-37.3906	5.21875	-4.46562	-48.2938	-46.0406	-20.0406	-51.6031	-50.6562	-42.9406	-51.7031	-49.2969	-46.85	-17.8969	-29.7344	-53.8563	-51.9156
		-0.04	1.78	-30.3375	-21.4469	-43.6656	-25.7469	7.44375	-42.0125	0.2	-11.1656	-51.2	-49.3438	-26.7469	-51.6156	-50.9	-47.1844	-51.8469	-49.3438	-50.2844	-24.9469	-35.7062	-53.9437	-52.0156
		-0.04	1.8	-36.0906	-27.9469	-47.2156	-31.875	2.95	-45.95	-5.98438	-18.1281	-53.6031	-52.0719	-32.7469	-51.7781	-51.0656	-50.6969	-52.0719	-49.4688	-53.0281	-31.325	-40.85	-53.9375	-52.2
		-0.04	1.82	-41.05	-33.9219	-50.2812	-37.375	-2.97187	-49.2313	-12.7344	-24.8625	-55.55	-54.2812	-38.0187	-51.9344	-51.2	-53.5406	-52.1719	-49.5281	-55.2844	-37.0875	-45.2844	-53.9219	-52.3438
		-0.04	1.84	-45.2125	-39	-52.7938	-42.0281	-9.6625	-51.9594	-19.7375	-31.1031	-57.1781	-56.0125	-42.6562	-52.0438	-51.4562	-55.775	-52.3	-49.5563	-57.1906	-42.0938	-48.975	-54.0125	-52.4594
		-0.04	1.86	-48.7125	-43.35	-54.8344	-45.9344	-16.6344	-54.0781	-26.4312	-36.55	-58.375	-57.4188	-46.5094	-52.1937	-51.6312	-57.5469	-52.4688	-49.725	-58.6969	-46.2719	-52.0312	-53.9813	-52.5812
		-0.04	1.88	-51.6063	-47.0469	-56.45	-49.2687	-23.5156	-55.875	-32.4406	-41.3563	-59.3125	-58.6281	-49.6875	-52.4313	-51.7719	-59	-52.6156	-49.8969	-59.8906	-49.7875	-54.6	-53.9469	-52.7812
		-0.04	1.9	-53.9562	-50.1	-57.75	-51.9813	-29.9312	-57.3469	-37.8312	-45.4844	-60.1375	-59.4313	-52.3094	-52.4813	-51.9719	-60.0938	-52.7344	-50.0125	-60.8438	-52.7	-56.6781	-53.9875	-52.9813
		-0.04	1.92	-55.7625	-52.55	-58.8438	-54.1281	-35.5906	-58.3937	-42.4437	-48.8625	-60.7656	-60.1469	-54.5125	-52.6781	-52.125	-60.8875	-52.9437	-50.2219	-61.7031	-55.1188	-58.2594	-54.0906	-53.0938
		-0.04	1.94	-57.3594	-54.5969	-59.625	-55.9	-40.4594	-59.2656	-46.2969	-51.6437	-61.1469	-60.7906	-56.1875	-52.8625	-52.3	-61.6094	-53.0844	-50.4406	-62.3094	-57.0187	-59.575	-54.1063	-53.2656
		-0.04	1.96	-58.5187	-56.3	-60.2375	-57.3812	-44.6594	-59.9969	-49.5719	-54.0406	-61.5281	-61.1469	-57.6	-52.9437	-52.5094	-62.1094	-53.1969	-50.6188	-62.8125	-58.5312	-60.5969	-54.15	-53.4688
		-0.04	1.98	-59.4031	-57.6	-60.8094	-58.4875	-48.1875	-60.5625	-52.3063	-55.8406	-61.8531	-61.4875	-58.8094	-53.1	-52.625	-62.4875	-53.3844	-50.7812	-63.1937	-59.85	-61.4	-54.2625	-53.6094
		-0.04	2	-60.2219	-58.575	-61.1719	-59.3688	-51	-60.9219	-54.4313	-57.3469	-61.9969	-61.7562	-59.7375	-53.3	-52.725	-62.725	-53.4125	-51.0344	-63.5062	-60.8594	-62.0844	-54.3	-53.8094
		-0.04	2.02	-60.8281	-59.4781	-61.3625	-60.0656	-53.3312	-61.1937	-56.2062	-58.5906	-62.0812	-61.9	-60.4344	-53.3656	-52.9031	-62.9313	-53.5438	-51.2594	-63.7375	-61.5906	-62.6281	-54.3187	-54.0531
		-0.04	2.04	-61.2469	-60.1719	-61.6937	-60.6281	-55.3	-61.45	-57.6625	-59.5656	-62.2469	-61.9844	-60.9688	-53.5219	-53.125	-63.1063	-53.7094	-51.4469	-63.8375	-62.3375	-62.9875	-54.4469	-54.2906
		-0.04	2.06	-61.6125	-60.6437	-61.8531	-60.9594	-56.85	-61.6312	-58.775	-60.275	-62.3219	-62.1437	-61.45	-53.7094	-53.2562	-63.1937	-53.7969	-51.5875	-63.9906	-62.8844	-63.3719	-54.5969	-54.4437
		-0.04	2.08	-61.9	-61.0125	-61.95	-61.2875	-58.025	-61.6937	-59.6875	-60.8812	-62.3094	-62.1813	-61.7687	-53.8	-53.45	-63.2875	-53.9406	-51.8625	-64.1094	-63.2844	-63.5469	-54.6094	-54.5938
		-0.04	2.1	-62.0438	-61.4156	-61.9813	-61.55	-59.1	-61.7344	-60.4406	-61.4125	-62.35	-62.1656	-62.0469	-54.0094	-53.55	-63.3844	-54.1344	-52.0844	-64.1906	-63.5312	-63.7281	-54.7531	-54.7969
		-0.04	2.12	-62.1656	-61.6094	-62.0781	-61.7344	-59.9719	-61.8531	-61.0125	-61.6906	-62.4344	-62.1937	-62.25	-54.1875	-53.6344	-63.425	-54.2219	-52.2625	-64.2219	-63.8406	-63.9094	-54.9281	-55.0281
		-0.04	2.14	-62.2906	-61.7375	-62.1531	-61.8219	-60.5438	-61.9125	-61.4469	-61.9156	-62.3875	-62.2375	-62.4	-54.3063	-53.8156	-63.4219	-54.4344	-52.4594	-64.3313	-64.05	-63.9625	-55.0687	-55.1781
		-0.04	2.16	-62.2156	-61.9594	-62.1188	-61.9031	-61.025	-61.8563	-61.8469	-62.1719	-62.3969	-62.1562	-62.5312	-54.4938	-53.9125	-63.4188	-54.6406	-52.7188	-64.3438	-64.125	-64.0437	-55.1688	-55.3875
		-0.04	2.18	-62.2719	-61.9875	-62.1344	-62.0125	-61.4437	-61.8875	-62.0844	-62.3438	-62.4219	-62.2281	-62.6375	-54.65	-54.0406	-63.4375	-54.6937	-52.8469	-64.325	-64.2656	-64.2031	-55.3438	-55.5969
		-0.04	2.2	-62.3563	-61.9594	-62.1969	-61.9594	-61.65	-61.8781	-62.2	-62.4094	-62.4313	-62.2344	-62.6781	-54.7313	-54.2219	-63.4656	-54.85	-53.0687	-64.3063	-64.4	-64.1687	-55.4844	-55.7969
		-0.04	2.22	-62.3438	-62.05	-62.2156	-61.9938	-61.8719	-61.8438	-62.3781	-62.5406	-62.3563	-62.2281	-62.675	-54.8531	-54.3781	-63.4313	-55.0469	-53.2406	-64.3375	-64.4031	-64.2344	-55.5781	-55.9
		-0.04	2.24	-62.2781	-62.0875	-62.15	-62.0312	-62.0438	-61.7938	-62.475	-62.5938	-62.3281	-62.2062	-62.6562	-55.0031	-54.5	-63.4625	-55.0812	-53.45	-64.3688	-64.4594	-64.3063	-55.7313	-56.0687
		-0.04	2.26	-62.2969	-62.0781	-62.2	-61.9906	-62.1	-61.8094	-62.4281	-62.5687	-62.425	-62.2469	-62.7	-55.075	-54.6437	-63.5469	-55.2562	-53.6219	-64.4031	-64.5563	-64.2812	-55.9125	-56.25
		-0.04	2.28	-62.3	-62.0125	-62.1875	-61.8875	-62.1875	-61.7906	-62.4	-62.6063	-62.35	-62.2313	-62.7156	-55.25	-54.7812	-63.5094	-55.3875	-53.8	-64.4375	-64.6	-64.3562	-55.9875	-56.4125
		-0.04	2.3	-62.2438	-62.0687	-62.1188	-61.9	-62.2625	-61.7375	-62.6312	-62.65	-62.35	-62.2188	-62.6656	-55.3969	-54.9094	-63.4844	-55.4594	-53.9688	-64.5	-64.5969	-64.3969	-56.1562	-56.5594
		-0.04	2.32	-62.2	-61.9656	-62.1375	-61.9469	-62.3	-61.7219	-62.5156	-62.575	-62.3625	-62.2469	-62.6813	-55.4688	-55.1094	-63.5469	-55.6531	-54.1281	-64.4313	-64.6469	-64.35	-56.2969	-56.7531
		-0.04	2.34	-62.2531	-61.9281	-62.1688	-61.8969	-62.2875	-61.8125	-62.5187	-62.5938	-62.4375	-62.2125	-62.7406	-55.6562	-55.2156	-63.5687	-55.8125	-54.2531	-64.4688	-64.7344	-64.4344	-56.4094	-57
		-0.04	2.36	-62.2625	-61.95	-62.1219	-61.825	-62.2812	-61.8	-62.6688	-62.6375	-62.3937	-62.1813	-62.75	-55.85	-55.2781	-63.5125	-55.8875	-54.4344	-64.5437	-64.7125	-64.4531	-56.5156	-57.1031
		-0.04	2.38	-62.1875	-61.9531	-62.1094	-61.8344	-62.325	-61.7594	-62.5469	-62.6031	-62.4437	-62.2438	-62.7	-55.8844	-55.4125	-63.5687	-56.0812	-54.5938	-64.5156	-64.7281	-64.4469	-56.7125	-57.2313
		-0.04	2.4	-62.2344	-61.9281	-62.1156	-61.8375	-62.3094	-61.7875	-62.575	-62.5438	-62.4969	-62.2562	-62.7719	-56.0781	-55.5844	-63.6562	-56.1781	-54.7188	-64.5281	-64.7594	-64.5281	-56.8563	-57.3844
		-0.04	2.42	-62.2438	-61.9531	-62.2062	-61.8187	-62.2781	-61.8281	-62.6	-62.525	-62.4938	-62.2656	-62.8156	-56.2594	-55.65	-63.6219	-56.3187	-54.8125	-64.5781	-64.7844	-64.55	-56.9625	-57.55
		-0.04	2.44	-62.2	-61.9813	-62.1719	-61.8375	-62.3	-61.8406	-62.5406	-62.5563	-62.4875	-62.2906	-62.8	-56.3031	-55.8031	-63.6188	-56.4875	-55.0094	-64.6219	-64.7312	-64.5719	-57.1312	-57.65
		-0.04	2.46	-62.2562	-61.9344	-62.1281	-61.8312	-62.3406	-61.8094	-62.5156	-62.5219	-62.5687	-62.3219	-62.8094	-56.4656	-55.9375	-63.7062	-56.6	-55.1031	-64.6594	-64.7375	-64.5844	-57.2656	-57.7812
		-0.04	2.48	-62.275	-61.8812	-62.1688	-61.8094	-62.2656	-61.8969	-62.5906	-62.5656	-62.6156	-62.3031	-62.85	-56.5563	-55.9844	-63.7469	-56.7062	-55.2156	-64.7	-64.8125	-64.6	-57.3563	-57.95
		-0.04	2.5	-62.2562	-61.925	-62.1937	-61.775	-62.2656	-61.8906	-62.6156	-62.6	-62.5656	-62.3	-62.8656	-56.6406	-56.2	-63.7469	-56.8812	-55.3469	-64.725	-64.9	-64.65	-57.475	-58.0938
		-0.04	2.52	-62.3281	-61.95	-62.1656	-61.7906	-62.2656	-61.9094	-62.5719	-62.5438	-62.5812	-62.4	-62.8219	-56.7625	-56.3312	-63.8156	-56.9281	-55.5719	-64.7	-64.875	-64.7375	-57.6688	-58.1906
		-0.04	2.54	-62.3625	-61.9375	-62.1875	-61.8812	-62.2438	-61.9719	-62.6688	-62.5969	-62.7062	-62.4469	-62.8406	-56.925	-56.3875	-63.9094	-56.9875	-55.6969	-64.7937	-64.9187	-64.7625	-57.7906	-58.3
		-0.04	2.56	-62.3312	-61.9688	-62.2687	-61.85	-62.2344	-62.0125	-62.6844	-62.6344	-62.7156	-62.4313	-62.9125	-56.9688	-56.5312	-63.8625	-57.2062	-55.7656	-64.8344	-64.9906	-64.7719	-57.8469	-58.4562
		-0.04	2.58	-62.3844	-62.025	-62.2969	-61.9	-62.2594	-61.9969	-62.6875	-62.6844	-62.7	-62.5594	-62.925	-57.0781	-56.6375	-63.9688	-57.2438	-55.9437	-64.7719	-64.9906	-64.8438	-58.0156	-58.5719
		-0.04	2.6	-62.45	-62	-62.2438	-61.9594	-62.2531	-62.0281	-62.7406	-62.6719	-62.8125	-62.6469	-62.925	-57.1875	-56.6688	-64.0437	-57.3094	-56.1219	-64.8844	-64.9781	-64.8812	-58.15	-58.625
		-0.04	2.62	-62.4281	-61.9875	-62.3094	-61.9875	-62.2094	-62.1312	-62.7313	-62.775	-62.8719	-62.6125	-63.0219	-57.2219	-56.8312	-64.0656	-57.45	-56.1969	-64.9531	-65.0281	-64.9313	-58.2156	-58.7812
		-0.04	2.64	-62.4437	-62.0312	-62.3906	-61.9094	-62.2219	-62.1531	-62.7406	-62.8	-62.8937	-62.725	-63.0625	-57.3063	-56.9969	-64.0844	-57.475	-56.25	-64.9437	-65.1219	-64.9812	-58.3281	-58.9406
		-0.04	2.66	-62.575	-62.05	-62.375	-61.9094	-62.2531	-62.1375	-62.75	-62.7969	-62.9188	-62.7875	-63.0687	-57.4437	-57.025	-64.1937	-57.5844	-56.4437	-65.0094	-65.1344	-64.975	-58.4625	-59.0563
		-0.04	2.68	-62.5625	-62.0687	-62.3937	-62.0312	-62.2625	-62.2687	-62.825	-62.8688	-63.0156	-62.7594	-63.0719	-57.4875	-57.1406	-64.2344	-57.7188	-56.5656	-65.125	-65.175	-65.0969	-58.5156	-59.1094
		-0.04	2.7	-62.5469	-62.1125	-62.4969	-62.0375	-62.325	-62.3375	-62.8125	-62.9125	-63.0375	-62.8156	-63.1906	-57.6	-57.2906	-64.3	-57.7969	-56.6469	-65.1438	-65.2281	-65.15	-58.575	-59.2281
		-0.04	2.72	-62.6875	-62.1594	-62.5625	-62.0781	-62.3844	-62.3563	-62.85	-62.9188	-63.0125	-62.9375	-63.2188	-57.7219	-57.3906	-64.3906	-57.9031	-56.75	-65.1438	-65.2531	-65.1625	-58.7719	-59.3656
		-0.04	2.74	-62.75	-62.1562	-62.5062	-62.1656	-62.45	-62.4406	-62.8969	-62.9813	-63.1	-62.9781	-63.2219	-57.7719	-57.4719	-64.4156	-58.0344	-56.9	-65.2469	-65.2719	-65.25	-58.875	-59.3688
		-0.04	2.76	-62.7344	-62.1594	-62.5969	-62.2531	-62.35	-62.4938	-62.9125	-63.0406	-63.175	-63.0344	-63.2812	-57.8875	-57.6125	-64.4062	-58.1156	-56.9938	-65.1906	-65.3	-65.275	-58.9531	-59.4562
		-0.04	2.78	-62.8156	-62.2062	-62.6594	-62.2125	-62.3969	-62.5	-62.9	-63.0563	-63.125	-63.1625	-63.4062	-57.9938	-57.6344	-64.5406	-58.175	-57.0281	-65.25	-65.3531	-65.3	-59.05	-59.5719
		-0.04	2.8	-62.8656	-62.2562	-62.6406	-62.2531	-62.4625	-62.5719	-63.025	-63.0563	-63.1	-63.1781	-63.4719	-58.0594	-57.6719	-64.5687	-58.2969	-57.1125	-65.3063	-65.3656	-65.3969	-59.1813	-59.7
		-0.04	2.82	-62.8656	-62.2125	-62.6625	-62.3187	-62.5062	-62.6406	-63.0875	-63.2094	-63.1813	-63.2344	-63.4281	-58.0906	-57.875	-64.6	-58.3187	-57.2406	-65.3281	-65.3187	-65.45	-59.2469	-59.7156
		-0.04	2.84	-62.9437	-62.3438	-62.7844	-62.35	-62.4969	-62.7219	-63.0469	-63.2156	-63.2188	-63.3219	-63.5312	-58.1906	-57.8937	-64.7125	-58.3969	-57.3	-65.375	-65.4062	-65.4719	-59.2969	-59.8
		-0.04	2.86	-63.1	-62.4437	-62.8594	-62.325	-62.5563	-62.75	-63.1656	-63.1719	-63.1406	-63.3219	-63.6406	-58.275	-58.0062	-64.6906	-58.55	-57.3469	-65.4969	-65.55	-65.5844	-59.4156	-59.9062
		-0.04	2.88	-63.0844	-62.4437	-62.85	-62.4	-62.625	-62.8781	-63.2	-63.2406	-63.1906	-63.3125	-63.6562	-58.3125	-58.1	-64.7594	-58.55	-57.4875	-65.5125	-65.5781	-65.5656	-59.5094	-60.0187
		-0.04	2.9	-63.0719	-62.4781	-62.925	-62.5469	-62.6031	-62.8719	-63.1688	-63.3563	-63.2969	-63.4188	-63.6688	-58.4781	-58.1	-64.8844	-58.6281	-57.5844	-65.525	-65.5906	-65.6062	-59.5594	-60.0125
		-0.04	2.92	-63.1094	-62.5219	-63.0344	-62.5844	-62.65	-62.9094	-63.2562	-63.375	-63.3344	-63.4813	-63.7375	-58.5031	-58.1469	-64.9469	-58.7375	-57.6	-65.6062	-65.6937	-65.7125	-59.6594	-60.1094
		-0.04	2.94	-63.1375	-62.5563	-63.1	-62.6	-62.725	-63	-63.3812	-63.3812	-63.3187	-63.4813	-63.775	-58.5625	-58.2656	-64.9437	-58.7219	-57.675	-65.6031	-65.8125	-65.6937	-59.7719	-60.2219
		-0.04	2.96	-63.1125	-62.55	-63.1031	-62.7	-62.7531	-63	-63.3281	-63.4719	-63.3563	-63.6	-63.8063	-58.6469	-58.3094	-65.0312	-58.8219	-57.8594	-65.6406	-65.8094	-65.7531	-59.7969	-60.3094
		-0.04	2.98	-63.1875	-62.6344	-63.1625	-62.7031	-62.775	-63.0438	-63.3656	-63.4969	-63.425	-63.7531	-63.8219	-58.6562	-58.3469	-65.0844	-58.9313	-57.95	-65.7344	-65.825	-65.8313	-59.85	-60.3438
		-0.04	3	-63.2875	-62.7344	-63.2625	-62.7	-62.8625	-63.1437	-63.4719	-63.5	-63.4125	-63.7594	-63.8937	-58.7	-58.4688	-65.125	-58.9375	-57.9375	-65.7	-65.8812	-65.8313	-59.9594	-60.4469
		-0.04	3.02	-63.3344	-62.7656	-63.2438	-62.7375	-62.9562	-63.1594	-63.55	-63.5969	-63.4188	-63.7562	-63.9938	-58.8219	-58.5125	-65.2156	-59	-58.0094	-65.7906	-65.9406	-65.9156	-60.0219	-60.5187
		-0.04	3.04	-63.3812	-62.8063	-63.2375	-62.8375	-62.9875	-63.175	-63.5469	-63.6562	-63.5094	-63.875	-63.9813	-58.8281	-58.6	-65.2438	-59.125	-58.1	-65.8344	-65.9875	-66.0312	-60.0625	-60.5531
		-0.04	3.06	-63.475	-62.8656	-63.3063	-62.8531	-63.05	-63.2844	-63.625	-63.6094	-63.5812	-63.975	-64.0344	-58.8688	-58.65	-65.2406	-59.1312	-58.175	-65.8594	-66.0031	-66	-60.1375	-60.6063
		-0.04	3.08	-63.4875	-62.8937	-63.3906	-62.8781	-63.1188	-63.375	-63.7094	-63.65	-63.5687	-63.9531	-64.1125	-58.9781	-58.7406	-65.2969	-59.1594	-58.2094	-65.9313	-66.1	-66.05	-60.2156	-60.75
		-0.04	3.1	-63.5469	-62.9	-63.4	-62.9531	-63.15	-63.3906	-63.7344	-63.7687	-63.5719	-64.0094	-64.15	-59.0094	-58.7562	-65.3562	-59.2375	-58.2844	-66.0219	-66.1844	-66.1344	-60.2438	-60.7812
		-0.04	3.12	-63.65	-62.9219	-63.4	-63.05	-63.1406	-63.4969	-63.8125	-63.825	-63.6594	-64.1406	-64.1125	-59.0375	-58.8469	-65.4094	-59.2656	-58.3875	-65.9844	-66.2	-66.1687	-60.2406	-60.8
		-0.04	3.14	-63.7188	-63.0125	-63.4813	-63.1	-63.1875	-63.4688	-63.9219	-63.7844	-63.6875	-64.1406	-64.2125	-59.1219	-58.9219	-65.5437	-59.3187	-58.3937	-66.0406	-66.225	-66.1656	-60.3688	-60.9
		-0.04	3.16	-63.6937	-63.0125	-63.5375	-63.1	-63.2938	-63.525	-63.9188	-63.9125	-63.7313	-64.1625	-64.2688	-59.1312	-58.9188	-65.525	-59.3875	-58.4156	-66.1281	-66.2875	-66.2844	-60.4313	-60.9437
		-0.04	3.18	-63.7875	-63.0375	-63.5594	-63.1625	-63.2687	-63.5812	-63.8844	-63.9656	-63.775	-64.3063	-64.3562	-59.1562	-59.0125	-65.5813	-59.4562	-58.4562	-66.1344	-66.3313	-66.2937	-60.45	-60.9781
		-0.04	3.2	-63.8156	-63.25	-63.5906	-63.2594	-63.3375	-63.5781	-63.9688	-64.0094	-63.8094	-64.3313	-64.4	-59.2469	-59.1562	-65.7063	-59.5219	-58.4906	-66.2063	-66.3656	-66.2875	-60.5687	-61.0125
		-0.04	3.22	-63.8187	-63.2844	-63.7125	-63.2469	-63.4	-63.5844	-64.0906	-64.0375	-63.8281	-64.3313	-64.4906	-59.3344	-59.1188	-65.7156	-59.675	-58.5219	-66.2156	-66.3906	-66.3938	-60.6688	-61.1
		-0.04	3.24	-63.8688	-63.2969	-63.7719	-63.2562	-63.4469	-63.7281	-64.075	-64.1656	-63.8844	-64.4812	-64.5094	-59.3406	-59.1969	-65.7219	-59.65	-58.6125	-66.2406	-66.4875	-66.375	-60.6375	-61.1344
		-0.04	3.26	-63.9562	-63.3344	-63.7969	-63.3406	-63.4	-63.7594	-64.1625	-64.2	-63.9625	-64.5813	-64.525	-59.4156	-59.3219	-65.8375	-59.7281	-58.7219	-66.3281	-66.5188	-66.3969	-60.7	-61.1375
		-0.04	3.28	-63.95	-63.4313	-63.8969	-63.4469	-63.4969	-63.8	-64.2188	-64.2438	-64.0344	-64.5281	-64.5813	-59.5	-59.2812	-65.8313	-59.8	-58.8094	-66.3594	-66.4906	-66.5	-60.8406	-61.2469
		-0.04	3.3	-63.9906	-63.5125	-63.9406	-63.4375	-63.5	-63.8781	-64.1875	-64.3406	-64	-64.5813	-64.6687	-59.5187	-59.325	-65.8844	-59.7969	-58.8281	-66.3656	-66.5312	-66.5125	-60.85	-61.25
		-0.04	3.32	-64.0375	-63.55	-63.9219	-63.4844	-63.5469	-63.8531	-64.25	-64.3719	-64	-64.6937	-64.7438	-59.5938	-59.4219	-66.0188	-59.8844	-58.875	-66.4688	-66.6438	-66.5594	-60.8719	-61.2531
		-0.04	3.34	-64.1406	-63.6312	-63.9094	-63.575	-63.5875	-63.9125	-64.3344	-64.3812	-64.1	-64.7	-64.7656	-59.6219	-59.4313	-65.9844	-59.9344	-58.9906	-66.4688	-66.6344	-66.6281	-60.9719	-61.3031
		-0.04	3.36	-64.1188	-63.675	-64.0156	-63.6406	-63.6906	-64.0125	-64.4281	-64.4313	-64.15	-64.7375	-64.7625	-59.6406	-59.425	-66.0938	-59.9156	-58.9781	-66.5	-66.6438	-66.65	-61.0438	-61.3812
		-0.04	3.38	-64.2094	-63.6406	-64.1188	-63.6156	-63.725	-63.975	-64.3906	-64.4938	-64.1844	-64.8344	-64.8656	-59.7	-59.5	-66.1687	-59.8781	-58.9906	-66.5594	-66.7	-66.6687	-61.0438	-61.2938
		-0.04	3.4	-64.2812	-63.6656	-64.1438	-63.6719	-63.7	-64.0719	-64.5094	-64.5125	-64.2875	-64.8594	-64.8625	-59.7594	-59.525	-66.1781	-59.9594	-59.1	-66.5719	-66.7844	-66.7937	-61.0781	-61.3094
		-0.04	3.42	-64.2781	-63.7875	-64.1188	-63.7375	-63.7469	-64.2188	-64.5219	-64.525	-64.3063	-64.85	-64.875	-59.7375	-59.525	-66.2094	-59.9625	-59.1688	-66.5969	-66.7875	-66.7562	-61.1469	-61.3406
		-0.04	3.44	-64.3219	-63.8531	-64.2406	-63.7781	-63.7594	-64.2063	-64.5563	-64.6062	-64.3187	-64.9062	-64.8969	-59.8	-59.5656	-66.2875	-59.9531	-59.1844	-66.6531	-66.8125	-66.7562	-61.1625	-61.2562
		-0.04	3.46	-64.3938	-63.8312	-64.25	-63.7969	-63.825	-64.2625	-64.5719	-64.6406	-64.3344	-64.975	-65	-59.8531	-59.6719	-66.3156	-60.0656	-59.2438	-66.5875	-66.8938	-66.825	-61.1625	-61.2656
		-0.04	3.48	-64.3625	-63.8937	-64.2312	-63.85	-63.8875	-64.2969	-64.65	-64.6438	-64.4313	-64.9844	-65.0031	-59.8406	-59.8	-66.3875	-60.05	-59.2875	-66.6875	-66.8906	-66.8	-61.2344	-61.2594
		-0.04	3.5	-64.3938	-63.9531	-64.2812	-63.9688	-63.9875	-64.3219	-64.7188	-64.7125	-64.4781	-64.9719	-65.0312	-59.9375	-59.7562	-66.4437	-60.1063	-59.2687	-66.7438	-66.9187	-66.8063	-61.3219	-61.1719
		-0.04	3.52	-64.4531	-63.9094	-64.3719	-63.9656	-64.0281	-64.3875	-64.7312	-64.7688	-64.4875	-65.0625	-65.0844	-60.0187	-59.8906	-66.4187	-60.1969	-59.3	-66.75	-66.9313	-66.9156	-61.3	-61.1219
		-0.04	3.54	-64.525	-64	-64.3688	-63.9875	-64.0687	-64.5219	-64.825	-64.7531	-64.5188	-65.1	-65.1813	-60	-59.8312	-66.4844	-60.1937	-59.4344	-66.8656	-67.0406	-66.9375	-61.3219	-61.1625
		-0.04	3.56	-64.5281	-64.0844	-64.4313	-64.0656	-64	-64.5125	-64.9313	-64.7562	-64.6219	-65.075	-65.1844	-60.0469	-59.9031	-66.5312	-60.1813	-59.4281	-66.9156	-67.0875	-66.9281	-61.3844	-61.1344
		-0.04	3.58	-64.5656	-64.1531	-64.4969	-64.1344	-64.1156	-64.6156	-64.9062	-64.8656	-64.6312	-65.1687	-65.2281	-60.125	-60.0031	-66.5312	-60.2687	-59.4219	-66.9	-67.0625	-67	-61.4656	-61.1312
		-0.04	3.6	-64.6687	-64.1562	-64.5563	-64.175	-64.1562	-64.6281	-64.9719	-64.8938	-64.6125	-65.2594	-65.3469	-60.1656	-59.9469	-66.6344	-60.2875	-59.5	-66.9844	-67.0969	-67.025	-61.4594	-61.1469
		-0.04	3.62	-64.7	-64.2188	-64.5781	-64.1875	-64.1062	-64.6312	-65.0563	-64.85	-64.7094	-65.2625	-65.3656	-60.2	-59.9688	-66.7063	-60.2875	-59.5375	-66.9719	-67.1562	-67.0188	-61.5344	-61.1
		-0.04	3.64	-64.7031	-64.3187	-64.5813	-64.2188	-64.2312	-64.6937	-65.1	-64.9844	-64.7812	-65.2688	-65.375	-60.1219	-60.05	-66.6937	-60.3688	-59.5438	-67.0188	-67.1969	-67.0875	-61.6437	-61.0625
		-0.04	3.66	-64.7969	-64.35	-64.6438	-64.2719	-64.2875	-64.7125	-65.0563	-65.0156	-64.8156	-65.3531	-65.4187	-60.25	-60.0656	-66.75	-60.3594	-59.6063	-67.1281	-67.1719	-67.0813	-61.6312	-61.1656
		-0.04	3.68	-64.8156	-64.3156	-64.6687	-64.2719	-64.325	-64.7312	-65.1625	-64.9969	-64.8531	-65.375	-65.5	-60.2562	-60.0687	-66.8156	-60.35	-59.6469	-67.0938	-67.2219	-67.075	-61.6625	-61.1344
		-0.04	3.7	-64.8	-64.3281	-64.6219	-64.3125	-64.2906	-64.8	-65.1875	-65.0156	-64.95	-65.3969	-65.5	-60.2531	-60.1437	-66.8156	-60.5	-59.5719	-67.0625	-67.2937	-67.1438	-61.7125	-61.1906
		-0.04	3.72	-64.8	-64.4094	-64.7188	-64.3812	-64.3781	-64.8344	-65.1719	-65.1	-64.9531	-65.4531	-65.5	-60.3	-60.1937	-66.9563	-60.4656	-59.6219	-67.1719	-67.3	-67.1687	-61.7281	-61.2656
		-0.04	3.74	-64.9	-64.4281	-64.7906	-64.4375	-64.4219	-64.8406	-65.275	-65.075	-64.9844	-65.5188	-65.575	-60.1969	-60.1625	-66.9469	-60.3969	-59.7125	-67.1875	-67.2625	-67.175	-61.775	-61.2594
		-0.04	3.76	-64.9313	-64.4375	-64.8375	-64.4563	-64.4563	-64.9437	-65.3	-65.0906	-65.0281	-65.4344	-65.6094	-60.3281	-60.2531	-67	-60.4938	-59.7344	-67.1687	-67.325	-67.2156	-61.825	-61.2406
		-0.04	3.78	-64.9187	-64.5625	-64.8094	-64.525	-64.4938	-64.9437	-65.3313	-65.2125	-65.1156	-65.45	-65.6094	-60.3781	-60.2781	-67.0687	-60.5031	-59.725	-67.2406	-67.3688	-67.2625	-61.8312	-61.3219
		-0.04	3.8	-64.975	-64.5969	-64.8938	-64.5625	-64.55	-64.9563	-65.3438	-65.2531	-65.1031	-65.4969	-65.6531	-60.3719	-60.2344	-67.0687	-60.5156	-59.8156	-67.2125	-67.3625	-67.2875	-61.825	-61.3156
		-0.04	3.82	-65.0625	-64.5687	-64.9125	-64.5531	-64.5719	-65.0219	-65.3906	-65.2688	-65.1344	-65.5	-65.7406	-60.45	-60.3125	-67.0813	-60.5938	-59.7812	-67.2469	-67.3625	-67.325	-61.8094	-61.2906
		-0.04	3.84	-65.0281	-64.6188	-64.9	-64.5594	-64.5687	-65.0375	-65.4062	-65.2875	-65.2312	-65.4656	-65.7406	-60.4719	-60.3406	-67.0969	-60.625	-59.8125	-67.3125	-67.4719	-67.3844	-61.8312	-61.3969
		-0.04	3.86	-65.0094	-64.6875	-64.9625	-64.625	-64.5844	-65.0594	-65.4219	-65.3594	-65.2063	-65.5219	-65.7719	-60.45	-60.3375	-67.1406	-60.6	-59.8312	-67.3	-67.4688	-67.4094	-61.9375	-61.4375
		-0.04	3.88	-65.1469	-64.7156	-65.0531	-64.6125	-64.6719	-65.1312	-65.5906	-65.4156	-65.225	-65.5563	-65.8906	-60.4938	-60.4031	-67.1844	-60.6813	-59.8031	-67.2781	-67.4219	-67.4406	-61.875	-61.475
		-0.04	3.9	-65.125	-64.675	-65.0406	-64.5844	-64.6594	-65.0906	-65.6094	-65.4281	-65.2969	-65.5594	-65.8656	-60.575	-60.475	-67.2594	-60.7281	-59.8469	-67.3438	-67.4969	-67.5156	-61.9281	-61.5406
		-0.04	3.92	-65.1562	-64.725	-65.0469	-64.5844	-64.6813	-65.125	-65.5625	-65.4563	-65.3625	-65.5687	-65.8938	-60.575	-60.45	-67.2312	-60.7125	-59.925	-67.3094	-67.5938	-67.45	-62.0375	-61.5687
		-0.04	3.94	-65.1875	-64.8125	-65.1188	-64.6813	-64.7	-65.1531	-65.6031	-65.5062	-65.3656	-65.6156	-66	-60.6	-60.4938	-67.2188	-60.7531	-59.9375	-67.3469	-67.5906	-67.525	-62.0969	-61.575
		-0.04	3.96	-65.2875	-64.8	-65.2031	-64.7562	-64.7937	-65.1562	-65.7	-65.4812	-65.4031	-65.6	-65.9688	-60.6875	-60.5312	-67.3344	-60.7875	-59.9531	-67.4125	-67.6438	-67.6125	-62.0875	-61.6375
		-0.04	3.98	-65.3	-64.7656	-65.1562	-64.6969	-64.7875	-65.2656	-65.6813	-65.5375	-65.4	-65.6219	-66.0125	-60.6125	-60.5	-67.3156	-60.7438	-60.0156	-67.3812	-67.7094	-67.5594	-62.1406	-61.5969
		-0.04	4	-65.2937	-64.8812	-65.1719	-64.7031	-64.8187	-65.3125	-65.6438	-65.65	-65.3625	-65.6531	-66.05	-60.65	-60.5	-67.35	-60.7812	-59.9719	-67.4688	-67.7	-67.7	-62.1875	-61.6188
		-0.04	4.02	-65.3969	-64.9844	-65.2781	-64.8063	-64.8875	-65.2906	-65.725	-65.6781	-65.4437	-65.6875	-66.1562	-60.7125	-60.5469	-67.425	-60.8594	-60.0219	-67.5375	-67.6906	-67.65	-62.1875	-61.7313
		-0.04	4.04	-65.3969	-64.9969	-65.3125	-64.75	-64.9437	-65.3875	-65.7406	-65.6438	-65.5406	-65.6375	-66.1625	-60.7687	-60.6125	-67.4	-60.8281	-60.0625	-67.5125	-67.7469	-67.5969	-62.1781	-61.7156
		-0.04	4.06	-65.3906	-65	-65.2719	-64.7969	-64.9812	-65.4156	-65.7219	-65.7219	-65.525	-65.6781	-66.1625	-60.7094	-60.6125	-67.4062	-60.8281	-60.0656	-67.6031	-67.7844	-67.6813	-62.2375	-61.7125
		-0.04	4.08	-65.4	-65.0938	-65.3969	-64.9375	-65.0062	-65.4219	-65.7562	-65.75	-65.6156	-65.75	-66.1937	-60.7687	-60.7156	-67.5031	-60.9875	-60.05	-67.6438	-67.7281	-67.7656	-62.2594	-61.7906
		-0.04	4.1	-65.5125	-65.0938	-65.4563	-64.95	-65.05	-65.4688	-65.8125	-65.75	-65.5969	-65.7719	-66.1937	-60.8875	-60.7375	-67.4656	-60.9562	-60.1	-67.5813	-67.8031	-67.6687	-62.2094	-61.7938
		-0.04	4.12	-65.5375	-65.075	-65.4469	-64.9563	-65.05	-65.5031	-65.8281	-65.75	-65.5906	-65.7531	-66.2094	-60.8625	-60.6844	-67.4844	-60.825	-60.1344	-67.6	-67.85	-67.7094	-62.2188	-61.8375
		-0.04	4.14	-65.5125	-65.1344	-65.4656	-64.9875	-65.0094	-65.5062	-65.8875	-65.8406	-65.6781	-65.7969	-66.2531	-60.9	-60.7562	-67.5344	-61	-60.1937	-67.5938	-67.8469	-67.7625	-62.2812	-61.8656
		-0.04	4.16	-65.5594	-65.1687	-65.5344	-65.0594	-65.1062	-65.5687	-65.8969	-65.8125	-65.725	-65.8656	-66.275	-60.9969	-60.7969	-67.5781	-60.9625	-60.2781	-67.5687	-67.8812	-67.7344	-62.2812	-61.8344
		-0.04	4.18	-65.5719	-65.175	-65.5437	-65.0312	-65.1594	-65.6094	-65.9187	-65.825	-65.6781	-65.8562	-66.3625	-60.95	-60.8187	-67.6062	-60.875	-60.2625	-67.6594	-67.9938	-67.7469	-62.2562	-61.9125
		-0.04	4.2	-65.5813	-65.1625	-65.5531	-65.0375	-65.1531	-65.6125	-65.9187	-65.8375	-65.675	-65.8875	-66.3906	-60.9844	-60.8	-67.6438	-61.0219	-60.2719	-67.6906	-67.9563	-67.8688	-62.3625	-61.9594
		-0.04	4.22	-65.675	-65.2219	-65.55	-65.1188	-65.1562	-65.6813	-65.9656	-65.9	-65.7344	-65.9688	-66.4	-61.0344	-60.8594	-67.6687	-60.9688	-60.3	-67.6969	-67.95	-67.8	-62.3812	-61.9562
		-0.04	4.24	-65.75	-65.3313	-65.6281	-65.1281	-65.25	-65.7438	-66.0094	-65.9031	-65.725	-65.9656	-66.425	-61.025	-60.875	-67.6594	-60.9625	-60.2438	-67.7344	-68.0094	-67.7625	-62.375	-62.0375
		-0.04	4.26	-65.7438	-65.3094	-65.6344	-65.1531	-65.2969	-65.6875	-65.975	-65.9437	-65.7562	-65.9844	-66.4656	-61.025	-60.8625	-67.7594	-61.0281	-60.2781	-67.8	-67.9844	-67.8656	-62.4031	-62.05
		-0.04	4.28	-65.7219	-65.3281	-65.5844	-65.2438	-65.2781	-65.6937	-66.0906	-65.9719	-65.8469	-65.9938	-66.4156	-61.05	-60.9656	-67.7656	-61.025	-60.3031	-67.7594	-68.05	-67.8531	-62.45	-62.025
		-0.04	4.3	-65.7906	-65.3594	-65.6562	-65.25	-65.2656	-65.7469	-66.1	-66.0125	-65.8281	-66.0781	-66.4688	-61.0656	-61.0187	-67.7688	-61.0281	-60.2531	-67.7906	-68.1438	-67.8531	-62.4344	-62.0563
		-0.04	4.32	-65.8	-65.4031	-65.7281	-65.2375	-65.3625	-65.7031	-66.0906	-65.9531	-65.9125	-66.0156	-66.5687	-61.0625	-60.9344	-67.8469	-61.0469	-60.2938	-67.8344	-68.1062	-67.9437	-62.3937	-62.1156
		-0.04	4.34	-65.7281	-65.3719	-65.7094	-65.3219	-65.4	-65.8313	-66.1531	-65.9563	-65.9469	-66.1	-66.5437	-61.1719	-61.0094	-67.8562	-61.125	-60.3219	-67.7688	-68.1375	-67.95	-62.4375	-62.1063
		-0.04	4.36	-65.7438	-65.3719	-65.7281	-65.375	-65.3969	-65.8469	-66.1937	-66.1062	-65.9	-66.1781	-66.5875	-61.1562	-61.0812	-67.8438	-61.0781	-60.2687	-67.8375	-68.2031	-67.925	-62.4562	-62.1719
		-0.04	4.38	-65.8	-65.45	-65.7969	-65.375	-65.4406	-65.8531	-66.2063	-66.15	-65.9375	-66.1844	-66.6375	-61.1219	-60.9906	-67.9094	-61.1562	-60.3219	-67.8812	-68.1719	-67.9719	-62.4688	-62.1094
		-0.04	4.4	-65.8438	-65.4719	-65.75	-65.4375	-65.5188	-65.9313	-66.175	-66.1188	-65.9719	-66.1813	-66.65	-61.1937	-61.025	-67.9313	-61.1906	-60.3781	-67.8562	-68.2	-67.9875	-62.4594	-62.1594
		-0.04	4.42	-65.825	-65.4656	-65.7594	-65.4313	-65.5	-65.95	-66.2812	-66.1562	-66	-66.2094	-66.7219	-61.2156	-61.0625	-67.9656	-61.1344	-60.3469	-67.8688	-68.2188	-67.9469	-62.575	-62.2875
		-0.04	4.44	-65.8938	-65.5125	-65.8375	-65.3719	-65.4688	-65.9313	-66.3125	-66.1969	-66.0125	-66.2469	-66.7812	-61.15	-61.0375	-68	-61.2	-60.4062	-67.8938	-68.1875	-68.0281	-62.6031	-62.25
		-0.04	4.46	-65.9219	-65.5687	-65.8438	-65.475	-65.5625	-65.9812	-66.3031	-66.2	-66.1344	-66.225	-66.7781	-61.1094	-61.0156	-67.9656	-61.2781	-60.3719	-67.8844	-68.2438	-68.0687	-62.525	-62.2625
		-0.04	4.48	-65.9563	-65.5969	-65.8688	-65.525	-65.5719	-65.9938	-66.3281	-66.2031	-66.0656	-66.2688	-66.8	-61.1688	-61.0719	-67.9938	-61.2469	-60.3937	-67.9313	-68.2781	-68.05	-62.5344	-62.2875
		-0.04	4.5	-65.9313	-65.6	-65.9406	-65.5344	-65.55	-65.9625	-66.375	-66.25	-66.1438	-66.3625	-66.8719	-61.1688	-61.1	-68.05	-61.2219	-60.45	-67.9812	-68.2625	-68.1625	-62.5938	-62.25
		-0.04	4.52	-66.0062	-65.6469	-65.9313	-65.575	-65.5687	-66.0969	-66.3812	-66.3219	-66.2031	-66.3	-66.8375	-61.2156	-61.0844	-68.0156	-61.2969	-60.4594	-67.9406	-68.2656	-68.0531	-62.55	-62.2938
		-0.04	4.54	-66.0281	-65.7	-65.9375	-65.5531	-65.6594	-66.0875	-66.35	-66.2719	-66.1937	-66.3281	-66.8063	-61.3406	-61.1312	-68	-61.2656	-60.4688	-68.025	-68.3	-68.0406	-62.5062	-62.3656
		-0.04	4.56	-65.975	-65.6219	-65.9469	-65.525	-65.6375	-66.05	-66.4313	-66.3	-66.2656	-66.3875	-66.9	-61.3438	-61.15	-68.0844	-61.2562	-60.5	-68.0406	-68.2688	-68.1	-62.6	-62.3375
		-0.04	4.58	-65.9688	-65.6406	-66	-65.6344	-65.6406	-66.0938	-66.4437	-66.3438	-66.3	-66.4437	-66.8344	-61.3	-61.1063	-68.075	-61.3563	-60.4781	-67.9688	-68.3438	-68.1375	-62.6656	-62.4125
		-0.04	4.6	-66.0625	-65.6813	-66.0406	-65.7	-65.6937	-66.1094	-66.4187	-66.3219	-66.3	-66.45	-66.8688	-61.3563	-61.1125	-68.075	-61.3344	-60.5406	-68.025	-68.3594	-68.1719	-62.6219	-62.5187
		-0.04	4.62	-66.0969	-65.7156	-66	-65.6687	-65.6781	-66.1281	-66.5219	-66.3656	-66.3187	-66.4219	-66.8906	-61.3656	-61.2219	-68.1656	-61.2687	-60.6094	-68.0563	-68.3375	-68.1094	-62.6125	-62.4469
		-0.04	4.64	-66.0906	-65.6969	-66.1125	-65.7531	-65.6781	-66.1687	-66.55	-66.4531	-66.3156	-66.4906	-66.8875	-61.3844	-61.1375	-68.175	-61.3094	-60.6125	-67.9719	-68.3469	-68.2094	-62.6594	-62.4938
		-0.04	4.66	-66.0938	-65.7125	-66.1125	-65.7469	-65.7812	-66.2125	-66.4938	-66.4719	-66.2281	-66.5031	-66.9781	-61.4188	-61.1906	-68.175	-61.3937	-60.6	-68.0469	-68.3625	-68.25	-62.675	-62.5438
		-0.04	4.68	-66.0969	-65.8281	-66.0844	-65.7469	-65.8	-66.2	-66.5406	-66.45	-66.3469	-66.4688	-67.0125	-61.475	-61.25	-68.2812	-61.3875	-60.65	-68.0781	-68.3594	-68.1906	-62.6406	-62.5
		-0.04	4.7	-66.0563	-65.8562	-66.1125	-65.8219	-65.7875	-66.2719	-66.6125	-66.4844	-66.3281	-66.5625	-66.9938	-61.4	-61.2812	-68.2656	-61.4	-60.6	-68.0813	-68.3812	-68.25	-62.6844	-62.5656
		-0.04	4.72	-66.1188	-65.8	-66.175	-65.8344	-65.7781	-66.2781	-66.6406	-66.5406	-66.3406	-66.5938	-67.0813	-61.4188	-61.2656	-68.1875	-61.45	-60.6813	-68.0906	-68.3875	-68.2562	-62.7125	-62.6
		-0.04	4.74	-66.225	-65.8531	-66.1969	-65.8469	-65.825	-66.2531	-66.5656	-66.5	-66.3938	-66.5969	-67	-61.4688	-61.35	-68.25	-61.3812	-60.6719	-68.15	-68.3562	-68.25	-62.7156	-62.55
		-0.04	4.76	-66.2063	-65.8969	-66.225	-65.9187	-65.8063	-66.3031	-66.65	-66.5	-66.4	-66.5969	-67.0531	-61.4406	-61.3594	-68.3	-61.4625	-60.6437	-68.1094	-68.425	-68.2719	-62.6437	-62.5875
		-0.04	4.78	-66.1813	-65.8812	-66.2344	-65.95	-65.8531	-66.3313	-66.65	-66.5625	-66.3688	-66.6562	-67.1219	-61.4313	-61.3375	-68.2469	-61.525	-60.6719	-68.0969	-68.4875	-68.2937	-62.6875	-62.6719
		-0.04	4.8	-66.2344	-65.8344	-66.2063	-65.8781	-65.8906	-66.3031	-66.7	-66.5719	-66.4781	-66.6469	-67.0875	-61.5094	-61.3469	-68.3438	-61.4813	-60.6719	-68.1656	-68.4719	-68.3	-62.7031	-62.6375
		-0.04	4.82	-66.2188	-65.9187	-66.2688	-65.9625	-65.9062	-66.325	-66.6594	-66.5594	-66.4594	-66.6156	-67.0906	-61.5344	-61.4375	-68.3875	-61.5375	-60.6344	-68.0906	-68.5687	-68.275	-62.675	-62.6844
		-0.04	4.84	-66.2156	-65.9719	-66.2844	-65.9688	-65.9469	-66.4187	-66.7	-66.6	-66.4437	-66.6625	-67.1719	-61.5062	-61.4125	-68.3625	-61.5625	-60.7	-68.1344	-68.5	-68.3344	-62.65	-62.7
		-0.04	4.86	-66.25	-65.9125	-66.2156	-65.9656	-65.9844	-66.45	-66.7375	-66.65	-66.5	-66.7406	-67.1406	-61.5438	-61.4281	-68.3719	-61.55	-60.7656	-68.1719	-68.5219	-68.2906	-62.75	-62.6531
		-0.04	4.88	-66.3281	-65.9125	-66.2719	-66.0156	-65.95	-66.45	-66.6594	-66.6344	-66.5188	-66.7625	-67.125	-61.5187	-61.4844	-68.4031	-61.4969	-60.725	-68.1312	-68.5781	-68.3344	-62.7781	-62.7125
		-0.04	4.9	-66.2875	-65.95	-66.2969	-66.0156	-66.0094	-66.4906	-66.7156	-66.6625	-66.5687	-66.75	-67.1156	-61.5125	-61.5187	-68.3844	-61.5156	-60.7812	-68.1969	-68.5437	-68.3594	-62.7313	-62.7188
		-0.04	4.92	-66.2375	-65.9344	-66.2969	-66.0844	-66.0156	-66.4469	-66.8375	-66.65	-66.5813	-66.7594	-67.1375	-61.5	-61.5156	-68.4125	-61.5219	-60.8	-68.2469	-68.575	-68.3125	-62.75	-62.6562
		-0.04	4.94	-66.2781	-65.9344	-66.3	-66.1188	-66.0156	-66.4594	-66.8187	-66.7156	-66.575	-66.7906	-67.1781	-61.5844	-61.5344	-68.4531	-61.4813	-60.7562	-68.1875	-68.575	-68.3406	-62.8	-62.775
		-0.04	4.96	-66.3313	-65.9688	-66.325	-66.1	-66.05	-66.55	-66.8219	-66.6594	-66.6438	-66.8	-67.1625	-61.5563	-61.575	-68.4187	-61.5187	-60.7938	-68.2219	-68.5781	-68.3875	-62.75	-62.775
		-0.04	4.98	-66.3344	-66.0813	-66.2875	-66.1562	-66.1	-66.5188	-66.85	-66.65	-66.575	-66.8156	-67.1469	-61.55	-61.5406	-68.5	-61.6	-60.7875	-68.2312	-68.6188	-68.4	-62.7094	-62.7219
		0.06	0	-60.625	-60.7	-60.75	-60.5531	-61.7938	-61.7812	-61.95	-61.9156	-63.9594	-63.8969	-63.4188	-63.5875	-64.7688	-64.5781	-64.6906	-64.0625
		0.06	0.02	-60.6156	-60.7469	-60.7156	-60.5875	-61.7188	-61.7875	-62.0219	-61.9	-64.0281	-63.9406	-63.3969	-63.6219	-64.725	-64.5875	-64.6562	-64.0938
		0.06	0.04	-60.5844	-60.7094	-60.775	-60.6094	-61.7844	-61.825	-61.9437	-61.8656	-64.025	-63.95	-63.425	-63.6156	-64.725	-64.5594	-64.6281	-64.0437
		0.06	0.06	-60.5438	-60.7188	-60.75	-60.6344	-61.7687	-61.7875	-61.9969	-61.9188	-64.0125	-63.8312	-63.3875	-63.5812	-64.7531	-64.5625	-64.6906	-64.0594
		0.06	0.08	-60.5375	-60.7656	-60.7094	-60.6844	-61.7281	-61.7969	-62.0156	-61.9062	-64.0594	-63.8656	-63.3281	-63.6781	-64.6687	-64.575	-64.6625	-64.1344
		0.06	0.1	-60.5312	-60.7219	-60.8125	-60.6312	-61.7719	-61.8187	-61.9938	-61.825	-64.0781	-63.8688	-63.4156	-63.6344	-64.75	-64.5938	-64.65	-64.0906
		0.06	0.12	-60.2375	-60.3719	-60.4875	-60.2844	-61.375	-61.4062	-61.6	-61.5094	-63.6781	-63.4813	-63.0563	-63.2406	-64.4094	-64.2469	-64.3812	-63.7375
		0.06	0.14	-62.6063	-62.8156	-62.8625	-62.7625	-63.725	-63.7969	-64.0375	-63.8812	-66.2594	-66.0531	-65.5719	-65.85	-66.6875	-66.5938	-66.6813	-66.0875
		0.06	0.16	-66.6531	-66.8063	-66.9625	-66.8094	-67.7906	-67.85	-68.0625	-67.8969	-70.55	-70.425	-69.95	-70.1094	-70.6125	-70.5188	-70.5188	-69.9781
		0.06	0.18	-67.7625	-67.8781	-68.0687	-67.8906	-68.85	-68.9	-69.1188	-69.0687	-71.6625	-71.5781	-71.1219	-71.2344	-71.7625	-71.5781	-71.7438	-71.1188
		0.06	0.2	-67.2	-67.3313	-67.4781	-67.35	-68.3219	-68.375	-68.6969	-68.5125	-71.0594	-70.9	-70.4594	-70.625	-71.3031	-71.1625	-71.3156	-70.7156
		0.06	0.22	-66.1625	-66.25	-66.4313	-66.2531	-67.3313	-67.3625	-67.6219	-67.4531	-69.8187	-69.7812	-69.2688	-69.4313	-70.4156	-70.1875	-70.2469	-69.7281
		0.06	0.24	-65.1094	-65.2	-65.4187	-65.2188	-66.2094	-66.2781	-66.5062	-66.45	-68.55	-68.5531	-68.0156	-68.2125	-69.2875	-69.0813	-69.2125	-68.6219
		0.06	0.26	-64.15	-64.3187	-64.4938	-64.3281	-65.3	-65.4062	-65.65	-65.4594	-67.575	-67.5	-66.9719	-67.2438	-68.3438	-68.1375	-68.3156	-67.7375
		0.06	0.28	-63.4375	-63.5438	-63.825	-63.5406	-64.6062	-64.6687	-64.8812	-64.7	-66.7312	-66.7	-66.2219	-66.3844	-67.5938	-67.45	-67.5156	-66.9781
		0.06	0.3	-62.875	-62.95	-63.1937	-63	-63.9813	-64.0375	-64.2781	-64.2031	-66.125	-66.0969	-65.55	-65.7063	-67.0188	-66.8438	-66.9531	-66.3625
		0.06	0.32	-62.3969	-62.4938	-62.6344	-62.55	-63.575	-63.6906	-63.8656	-63.7	-65.6375	-65.6031	-65.1406	-65.3469	-66.6031	-66.4062	-66.5375	-65.9125
		0.06	0.34	-62.0563	-62.1312	-62.3312	-62.175	-63.2562	-63.3688	-63.4938	-63.375	-65.1906	-65.2469	-64.8406	-64.9844	-66.2594	-66.1062	-66.1469	-65.6281
		0.06	0.36	-61.8344	-61.9344	-62.075	-61.9562	-62.95	-63.0906	-63.2375	-63.1188	-64.9812	-65.075	-64.525	-64.6937	-66.0062	-65.8531	-65.9625	-65.375
		0.06	0.38	-61.5938	-61.6969	-61.8563	-61.7281	-62.7375	-62.9469	-63.0687	-62.9625	-64.8	-64.8313	-64.3719	-64.5437	-65.8594	-65.5781	-65.775	-65.1469
		0.06	0.4	-61.3969	-61.475	-61.6594	-61.5187	-62.6125	-62.7656	-62.9094	-62.775	-64.5719	-64.6687	-64.2063	-64.4031	-65.6906	-65.45	-65.5719	-65.0281
		0.06	0.42	-61.3219	-61.3656	-61.5687	-61.4562	-62.4062	-62.5844	-62.7188	-62.6656	-64.5031	-64.5938	-64.0813	-64.3	-65.5344	-65.3812	-65.5	-64.9
		0.06	0.44	-61.1781	-61.3187	-61.5469	-61.3156	-62.35	-62.4625	-62.675	-62.4938	-64.4062	-64.5594	-64.0312	-64.2469	-65.5	-65.1813	-65.3969	-64.7094
		0.06	0.46	-61.1125	-61.1906	-61.3812	-61.2094	-62.25	-62.35	-62.575	-62.4875	-64.2344	-64.4187	-63.9562	-64.125	-65.4094	-65.1	-65.2469	-64.6937
		0.06	0.48	-61.0938	-61.1813	-61.3812	-61.1937	-62.1937	-62.275	-62.4594	-62.4313	-64.2562	-64.3656	-63.8312	-64.0312	-65.3375	-65.0969	-65.2094	-64.6625
		0.06	0.5	-61.0062	-61.0344	-61.3656	-61.0656	-62.1406	-62.3156	-62.4469	-62.3156	-64.1906	-64.3406	-63.8406	-63.9469	-65.2906	-65.0281	-65.1969	-64.5594
		0.06	0.52	-60.9	-60.9688	-61.225	-61.0156	-62.1188	-62.225	-62.425	-62.275	-64.0813	-64.2844	-63.7875	-63.8375	-65.1844	-64.9	-65.0969	-64.4437
		0.06	0.54	-60.925	-60.9688	-61.2156	-61.0438	-62.1125	-62.1781	-62.3063	-62.2625	-64.0563	-64.2406	-63.7656	-63.8375	-65.1375	-64.8969	-65.0813	-64.5594
		0.06	0.56	-60.8187	-60.9031	-61.1875	-60.9688	-62.0312	-62.15	-62.2406	-62.1531	-64.0125	-64.25	-63.7562	-63.8875	-65.1594	-64.8906	-65.0469	-64.5156
		0.06	0.58	-60.7781	-60.8719	-61.1031	-60.95	-61.9688	-62.0469	-62.2781	-62.1937	-63.9688	-64.2562	-63.675	-63.8438	-65.1031	-64.8187	-64.9844	-64.3844
		0.06	0.6	-60.8	-60.8844	-61.1	-60.9813	-61.95	-62.05	-62.2156	-62.175	-63.95	-64.1344	-63.675	-63.7875	-65.05	-64.7937	-65.0156	-64.4563
		0.06	0.62	-60.7469	-60.8375	-61.1281	-60.925	-61.9219	-62.0844	-62.2375	-62.0906	-63.9562	-64.0719	-63.7156	-63.8406	-65.0969	-64.8125	-64.9656	-64.3469
		0.06	0.64	-60.725	-60.8625	-61.0938	-60.9344	-61.85	-62.0062	-62.2313	-62.125	-63.9	-64.1031	-63.625	-63.7406	-65.0281	-64.8031	-64.925	-64.3094
		0.06	0.66	-60.7594	-60.8781	-61.0187	-60.875	-61.7906	-62	-62.1156	-62.1	-63.975	-64.0906	-63.5875	-63.7469	-65.0344	-64.7312	-64.9406	-64.4062
		0.06	0.68	-60.6719	-60.7719	-61.125	-60.8563	-61.8719	-62.0531	-62.0812	-62.05	-64.0094	-63.9906	-63.625	-63.7875	-65.0469	-64.775	-64.95	-64.2906
		0.06	0.7	-60.6562	-60.8063	-61.0344	-60.8969	-61.8	-61.9313	-62.125	-62.0812	-63.9406	-64.1219	-63.5563	-63.7188	-65.0188	-64.8	-64.9062	-64.3
		0.06	0.72	-60.6875	-60.8219	-60.9594	-60.9094	-61.7938	-61.9594	-62.075	-62.0531	-63.9344	-64.1	-63.5781	-63.7219	-65.0563	-64.725	-64.8906	-64.2781
		0.06	0.74	-60.6281	-60.7562	-60.9594	-60.825	-61.8719	-61.9938	-62.0687	-62.0156	-63.925	-64.0281	-63.6125	-63.8125	-65.0844	-64.6875	-64.8187	-64.3375
		0.06	0.76	-60.6813	-60.7531	-60.9906	-60.8375	-61.8344	-61.9156	-62.1219	-62.025	-63.8781	-64.0281	-63.5469	-63.7656	-65.0219	-64.7281	-64.8562	-64.3
		0.06	0.78	-60.7125	-60.775	-60.9188	-60.85	-61.8312	-61.9344	-62.0875	-61.9875	-63.825	-64.0406	-63.5656	-63.6969	-65.0156	-64.6813	-64.8938	-64.2844
		0.06	0.8	-60.6688	-60.7375	-60.9656	-60.8438	-61.8469	-61.9156	-62.1094	-61.9688	-63.85	-63.9938	-63.5687	-63.7938	-65.025	-64.7	-64.8156	-64.3688
		0.06	0.82	-60.6875	-60.7469	-61.0156	-60.875	-61.7969	-61.8906	-62.1188	-61.9531	-63.8406	-63.9375	-63.4594	-63.7469	-64.9688	-64.75	-64.8469	-64.3187
		0.06	0.84	-60.7344	-60.7375	-60.95	-60.8125	-61.7812	-61.9062	-62.125	-61.925	-63.8875	-63.9531	-63.4594	-63.7062	-64.9844	-64.7406	-64.8656	-64.2531
		0.06	0.86	-60.6594	-60.6875	-60.9094	-60.7687	-61.8187	-61.9156	-62.0406	-61.975	-63.8719	-63.95	-63.5031	-63.7375	-64.9531	-64.6625	-64.8281	-64.3125
		0.06	0.88	-60.6	-60.75	-60.9688	-60.8438	-61.7687	-61.8312	-62.1	-61.9437	-63.85	-63.8125	-63.4437	-63.6656	-64.8906	-64.6906	-64.8281	-64.3031
		0.06	0.9	-60.6437	-60.6844	-60.9375	-60.8	-61.75	-61.85	-62.0656	-61.9156	-63.85	-63.7594	-63.4531	-63.6094	-64.9062	-64.7	-64.8156	-64.2562
		0.06	0.92	-60.5906	-60.6375	-60.9219	-60.775	-61.7625	-61.8187	-61.9875	-61.8438	-63.8	-63.6188	-63.5	-63.6125	-64.7656	-64.6406	-64.7625	-64.275
		0.06	0.94	-60.5687	-60.6625	-60.9562	-60.825	-61.6719	-61.7781	-62.0187	-61.7656	-63.6656	-63.3937	-63.3844	-63.5062	-64.6	-64.5625	-64.825	-64.3125
		0.06	0.96	-60.5781	-60.6094	-60.9781	-60.7812	-61.6188	-61.7219	-61.9562	-61.5906	-63.5187	-63.0563	-63.3469	-63.4656	-64.4938	-64.5625	-64.7812	-64.2438
		0.06	0.98	-60.4469	-60.5625	-60.8969	-60.6688	-61.5	-61.6625	-61.8375	-61.5312	-63.3344	-62.7719	-63.275	-63.4437	-64.3281	-64.5719	-64.7125	-64.2125
		0.06	1	-60.3656	-60.5312	-60.9219	-60.625	-61.3969	-61.6094	-61.7906	-61.3438	-63.125	-62.5625	-63.1531	-63.3969	-64.1469	-64.5	-64.7156	-64.2375
		0.06	1.02	-60.3563	-60.5094	-61.05	-60.55	-61.35	-61.65	-61.7938	-61.1781	-63.0219	-62.225	-63.0875	-63.3	-64.0406	-64.4812	-64.6531	-64.1844
		0.06	1.04	-60.3344	-60.5875	-61.0094	-60.6063	-61.3625	-61.7156	-61.7656	-61.1469	-62.7	-61.9	-62.9625	-63.2125	-63.85	-64.4812	-64.5	-64.1094
		0.06	1.06	-60.3656	-60.7031	-61.0687	-60.7125	-61.2562	-61.6969	-61.8063	-61.1437	-62.3781	-61.5906	-62.7375	-63	-63.6875	-64.4031	-64.3719	-64.0813
		0.06	1.08	-60.4813	-60.7969	-61.2219	-60.7406	-61.2406	-61.7938	-61.8937	-61.0656	-62.15	-61.2687	-62.6719	-62.8312	-63.6156	-64.4	-64.1687	-64.0437
		0.06	1.1	-60.4688	-60.9406	-61.3	-60.8063	-61.2062	-61.7531	-61.95	-61.0812	-61.8531	-60.9625	-62.55	-62.7188	-63.5406	-64.4875	-64	-63.9594
		0.06	1.12	-60.5219	-61.15	-61.3219	-60.8719	-61.1188	-61.6719	-62.0281	-61.1375	-61.55	-60.7219	-62.3969	-62.5062	-63.4375	-64.4625	-63.85	-63.9094
		0.06	1.14	-60.5594	-61.1875	-61.3906	-60.8469	-61.0563	-61.6188	-62.075	-61.1125	-61.4437	-60.475	-62.2438	-62.3	-63.3937	-64.3406	-63.65	-63.8125
		0.06	1.16	-60.5156	-61.1625	-61.3063	-60.7438	-61.0406	-61.45	-62.0469	-61.0875	-61.125	-60.0875	-62.0187	-62.0875	-63.2625	-64.2625	-63.475	-63.5906
		0.06	1.18	-60.4	-61.1	-61.0781	-60.5875	-60.85	-61.2438	-62.05	-60.9125	-60.725	-59.6625	-61.6406	-61.725	-63.0125	-64.1031	-63.225	-63.2594
		0.06	1.2	-60.1437	-60.8312	-60.7969	-60.175	-60.6312	-61	-62.0719	-60.5563	-60.3031	-59.1156	-61.0969	-61.2562	-62.6969	-63.7562	-62.8187	-62.9188
		0.06	1.22	-59.6656	-60.5062	-60.4	-59.7188	-60.3	-60.6781	-61.975	-60.1437	-59.7438	-58.3875	-60.4625	-60.7781	-62.1188	-63.4	-62.3312	-62.4125
		0.06	1.24	-58.9781	-59.9969	-59.8438	-59.1469	-59.8406	-60.2125	-61.7781	-59.5344	-59.0344	-57.575	-59.5125	-60.0656	-61.4375	-63.0344	-61.7156	-61.7156
		0.06	1.26	-58.3125	-59.2406	-59.2406	-58.3625	-59.4062	-59.75	-61.4938	-58.7906	-58.3969	-56.7875	-58.5656	-59.1063	-60.7094	-62.5469	-60.9313	-60.9406
		0.06	1.28	-57.3875	-58.525	-58.6688	-57.5938	-58.8438	-59.1344	-61	-57.9844	-57.7094	-55.9813	-57.6281	-58.2219	-59.8563	-62.0344	-60.1031	-60.15
		0.06	1.3	-56.2687	-57.6844	-57.9219	-56.7594	-58.0875	-58.35	-60.375	-57.1219	-56.9625	-55.0875	-56.5594	-57.2469	-59.0375	-61.6	-59.25	-59.2625
		0.06	1.32	-55.2062	-56.775	-57.1719	-55.9	-57.4	-57.6063	-59.65	-56.2375	-56.4031	-54.2219	-55.675	-56.2531	-58.2313	-61.1219	-58.2687	-58.4469
		0.06	1.34	-54.0563	-55.9469	-56.4531	-55.0656	-56.6625	-56.7562	-58.7656	-55.4	-55.7219	-53.5312	-54.8312	-55.3812	-57.4094	-60.5812	-57.4188	-57.65
		0.06	1.36	-52.8594	-55.1594	-55.7281	-54.2281	-55.9062	-55.8375	-57.8125	-54.4562	-55.0563	-52.8031	-53.9719	-54.4625	-56.6	-60.0938	-56.6125	-56.8719
		0.06	1.38	-51.7844	-54.3688	-55.025	-53.3438	-55.2344	-54.9875	-56.95	-53.4875	-54.6437	-52.0687	-53.2594	-53.4906	-55.9688	-59.75	-55.7687	-56.0938
		0.06	1.4	-50.7438	-53.8094	-54.4031	-52.6188	-54.5187	-54.1937	-56.0156	-52.5656	-54.1	-51.3969	-52.575	-52.7094	-55.3406	-59.3844	-55.0563	-55.5125
		0.06	1.42	-49.7406	-53.2875	-53.8	-51.9188	-53.8469	-53.4094	-55.0094	-51.6188	-53.5563	-50.8875	-51.8563	-51.9938	-54.7375	-58.9375	-54.4031	-54.9719
		0.06	1.44	-48.85	-52.8156	-53.2469	-51.1875	-53.2687	-52.7062	-54.225	-50.7	-53.1375	-50.3156	-51.3031	-51.2594	-54.2969	-58.6344	-53.8312	-54.4
		0.06	1.46	-47.9125	-52.3906	-52.8031	-50.6094	-52.7656	-52.1	-53.7156	-50.025	-52.75	-49.7969	-50.8187	-50.7188	-53.9	-58.4125	-53.3781	-53.9531
		0.06	1.48	-46.55	-52.0438	-52.3969	-50.1063	-52.275	-51.4875	-52.9437	-49.1688	-52.3406	-49.4125	-50.3094	-50.2344	-53.5375	-58.1969	-53.0344	-53.6125
		0.06	1.5	-44.3281	-51.6906	-51.9813	-49.5406	-51.9	-50.9406	-52.4313	-48.2562	-52.0938	-49.0625	-49.9562	-49.7531	-53.2687	-57.9688	-52.6906	-53.2969
		0.06	1.52	-41	-51.4719	-51.7594	-49.0219	-51.5094	-50.4219	-52.0375	-46.8187	-51.8875	-48.625	-49.6688	-49.3375	-53.0094	-57.8625	-52.4469	-52.9844
		0.06	1.54	-36.2781	-51.3	-51.5906	-48.5625	-51.1375	-49.8969	-51.55	-44.3688	-51.6031	-48.25	-49.2281	-49.0563	-52.75	-57.7469	-52.2719	-52.7562
		0.06	1.56	-29.8031	-51.125	-51.3312	-47.8438	-50.8563	-49.4	-51.2969	-40.6844	-51.4656	-47.6969	-48.9	-48.675	-52.5969	-57.6094	-52.0625	-52.5938
		0.06	1.58	-21.5	-50.9906	-51.15	-46.6312	-50.6	-48.7	-51.0156	-35.6875	-51.3281	-46.4188	-48.6344	-48.4219	-52.4156	-57.5938	-51.9719	-52.3625
		0.06	1.6	-12.1344	-50.8969	-51.075	-44.4	-50.3344	-47.2969	-50.7313	-28.7375	-51.1688	-43.9688	-48.2812	-47.9906	-52.2094	-57.5875	-51.8594	-52.3031
		0.06	1.62	-3.25938	-50.75	-50.9188	-40.9	-50.1344	-44.8156	-50.525	-19.875	-51.1344	-40.3156	-47.8844	-46.9	-52.125	-57.5156	-51.7344	-52.2812
		0.06	1.64	3.80312	-50.7094	-50.7687	-36.2687	-49.95	-41.2188	-50.35	-10.4375	-51.1594	-35.2188	-46.9688	-44.6312	-52.0469	-57.4906	-51.6656	-52.2
		0.06	1.66	8.425	-50.675	-50.725	-29.9312	-49.6906	-36.1562	-50.1406	-1.76875	-51.15	-28.1469	-44.9594	-41.2062	-51.9062	-57.5031	-51.6781	-52.1375
		0.06	1.68	10.0437	-50.6125	-50.6906	-21.5844	-49.5375	-29.2719	-49.8875	4.92188	-51.2	-18.9281	-41.7	-36.3937	-51.8875	-57.5156	-51.6312	-52.2125
		0.06	1.7	8.81563	-50.6344	-50.5781	-12.3156	-49.4	-20.575	-49.75	8.67188	-51.2469	-8.74063	-37.1906	-29.8937	-51.8594	-57.4469	-51.6562	-52.2125
		0.06	1.72	5.26562	-50.6469	-50.5812	-3.5375	-49.1469	-11.075	-49.5375	9.43125	-51.325	0.775	-30.9969	-21.2625	-51.8531	-57.5125	-51.6312	-52.1813
		0.06	1.74	0.0875	-50.6344	-50.5781	3.66563	-48.9094	-2.35	-49.2344	7.4	-51.4	8.19063	-22.6063	-11.2406	-51.9344	-57.6344	-51.5625	-52.25
		0.06	1.76	-6.26562	-50.6156	-50.5563	8.39062	-48.2375	4.4125	-48.8937	3.23125	-51.5406	12.4344	-12.6	-1.4125	-51.9656	-57.675	-51.65	-52.3594
		0.06	1.78	-13.1594	-50.6719	-50.55	10.1094	-46.7625	8.45	-47.9906	-2.35313	-51.5781	13.2312	-2.64062	6.6	-51.9906	-57.7375	-51.6937	-52.4188
		0.06	1.8	-20.0125	-50.6188	-50.5781	9.10625	-44.1719	9.44063	-46.0438	-8.9	-51.7188	10.8531	5.75	11.6125	-52.0938	-57.8812	-51.7656	-52.4656
		0.06	1.82	-26.625	-50.6063	-50.5687	5.725	-40.4875	7.55625	-42.9906	-16.0031	-51.85	6.12813	11.1281	13.2344	-52.2219	-57.9562	-51.9031	-52.6125
		0.06	1.84	-32.6531	-50.6813	-50.5469	0.51875	-35.3406	3.60938	-38.8125	-22.9375	-51.8719	-0.365625	13.2875	11.5063	-52.3094	-57.9688	-51.9469	-52.6875
		0.06	1.86	-37.8406	-50.6437	-50.575	-5.7	-28.4219	-1.84375	-33.0812	-29.3188	-52.0031	-7.825	12.0938	7.1625	-52.4938	-58.05	-52.0406	-52.75
		0.06	1.88	-42.4062	-50.6844	-50.55	-12.5562	-19.6375	-8.40312	-25.3031	-35.125	-52.225	-15.65	8.05625	1.0375	-52.6469	-58.1594	-52.2531	-52.9094
		0.06	1.9	-46.2313	-50.7656	-50.4656	-19.5312	-10.175	-15.3531	-16.1719	-40.1656	-52.3031	-23.2156	2.20625	-6.28125	-52.7281	-58.1813	-52.35	-53.025
		0.06	1.92	-49.4188	-50.65	-50.4344	-26.1219	-1.6625	-22.2125	-6.92188	-44.3812	-52.4188	-30.3312	-4.86562	-14.0969	-52.9094	-58.2094	-52.4313	-53.0531
		0.06	1.94	-52.0156	-50.6813	-50.5594	-32.1156	4.82188	-28.7687	1.1	-47.9188	-52.6312	-36.5531	-12.6969	-21.7844	-53.1125	-58.3281	-52.6531	-53.2188
		0.06	1.96	-54.1937	-50.7438	-50.5438	-37.525	8.725	-34.5938	6.65938	-50.8625	-52.7562	-41.8344	-20.45	-28.9094	-53.2031	-58.4531	-52.7719	-53.3594
		0.06	1.98	-55.8469	-50.7188	-50.5594	-42.0625	9.51875	-39.6562	9.45	-53.25	-52.85	-46.3063	-27.6969	-35.3406	-53.3875	-58.4375	-52.8688	-53.4344
		0.06	2	-57.2438	-50.7	-50.6281	-45.8937	7.575	-44.0625	9.3	-55.225	-53.1219	-49.9656	-34.3	-40.8187	-53.6469	-58.5312	-53.1063	-53.5438
		0.06	2.02	-58.3656	-50.7313	-50.6656	-49.1531	3.55	-47.7313	6.60313	-56.8094	-53.2	-52.8625	-39.9094	-45.3469	-53.7812	-58.6437	-53.2281	-53.6969
		0.06	2.04	-59.2469	-50.7	-50.6406	-51.8406	-2.10625	-50.7438	1.975	-57.9531	-53.2719	-55.1688	-44.5938	-49.1	-53.9562	-58.7625	-53.3719	-53.8063
		0.06	2.06	-59.8656	-50.7062	-50.6969	-53.9062	-8.70625	-53.2062	-3.87812	-58.9781	-53.5438	-57.05	-48.5656	-52.2031	-54.1781	-58.7875	-53.575	-53.95
		0.06	2.08	-60.4	-50.8187	-50.8	-55.7062	-15.6719	-55.2	-10.5781	-59.8125	-53.6219	-58.5375	-51.7562	-54.725	-54.2812	-58.8469	-53.7313	-54.1219
		0.06	2.1	-60.8375	-50.8063	-50.8406	-57.0469	-22.5781	-56.7875	-17.6	-60.3281	-53.675	-59.65	-54.3906	-56.6219	-54.45	-59.0125	-53.8812	-54.3156
		0.06	2.12	-61.025	-50.9	-50.9344	-58.1688	-29.0031	-58.1188	-24.3687	-60.7313	-53.8969	-60.5875	-56.3688	-58.2594	-54.6781	-59.0812	-54.1125	-54.3969
		0.06	2.14	-61.3187	-50.9906	-51.0781	-59.1719	-34.6875	-59.175	-30.6562	-61.0844	-54.0812	-61.3719	-57.8875	-59.4125	-54.8094	-59.075	-54.2469	-54.5125
		0.06	2.16	-61.5031	-51.025	-51.1094	-59.8594	-39.7	-59.9	-36.25	-61.325	-54.2281	-61.9	-59.1531	-60.2875	-54.9437	-59.2	-54.4813	-54.6906
		0.06	2.18	-61.55	-51.075	-51.2	-60.3844	-44	-60.5875	-41.0469	-61.5406	-54.425	-62.2687	-60.1531	-61.15	-55.175	-59.3063	-54.6594	-54.8125
		0.06	2.2	-61.5781	-51.2344	-51.3531	-60.85	-47.55	-61.1094	-45.0156	-61.7188	-54.5375	-62.6156	-60.9469	-61.6625	-55.3719	-59.3656	-54.8312	-54.9281
		0.06	2.22	-61.5469	-51.2969	-51.4125	-61.1437	-50.5344	-61.425	-48.45	-61.7656	-54.6437	-62.8719	-61.5187	-62.0781	-55.5094	-59.3969	-55.0281	-55.125
		0.06	2.24	-61.7313	-51.3563	-51.4906	-61.3375	-52.9531	-61.7	-51.2313	-61.7625	-54.7906	-63.0062	-61.9938	-62.4313	-55.7281	-59.5187	-55.2313	-55.3625
		0.06	2.26	-61.6437	-51.5438	-51.6437	-61.5656	-54.8906	-61.9625	-53.45	-61.8906	-54.9313	-63.0844	-62.3281	-62.6719	-55.9125	-59.625	-55.3844	-55.4813
		0.06	2.28	-61.6344	-51.675	-51.7375	-61.6844	-56.4813	-62.0625	-55.3063	-61.8438	-55.0812	-63.2125	-62.4781	-62.8281	-56.0625	-59.6844	-55.4938	-55.6344
		0.06	2.3	-61.7125	-51.7125	-51.8187	-61.7062	-57.7594	-62.1594	-56.8156	-61.8875	-55.2625	-63.325	-62.7344	-62.9562	-56.2781	-59.7281	-55.7219	-55.8063
		0.06	2.32	-61.6125	-51.8406	-51.8937	-61.8312	-58.7375	-62.3187	-57.9688	-61.9406	-55.4	-63.3469	-62.8906	-63.0781	-56.4531	-59.8812	-55.8281	-55.9469
		0.06	2.34	-61.6531	-51.925	-52.0156	-61.8625	-59.5187	-62.3219	-58.8812	-61.8906	-55.4594	-63.3719	-62.8719	-63.1063	-56.5187	-59.9437	-55.9688	-56.0438
		0.06	2.36	-61.625	-51.9719	-52.1406	-61.7844	-60.2031	-62.3719	-59.6781	-61.8656	-55.6188	-63.4031	-63	-63.1625	-56.6625	-60.0281	-56.2156	-56.2406
		0.06	2.38	-61.6	-52.1437	-52.1344	-61.925	-60.6625	-62.4437	-60.3	-61.9344	-55.7938	-63.425	-63.0469	-63.225	-56.8312	-60.0938	-56.3344	-56.3969
		0.06	2.4	-61.6188	-52.2938	-52.2844	-61.9594	-61.0031	-62.4	-60.7125	-61.875	-55.8625	-63.3656	-63	-63.1875	-56.9688	-60.2	-56.4844	-56.5344
		0.06	2.42	-61.6	-52.4031	-52.4531	-61.8344	-61.3781	-62.375	-61.0594	-61.8438	-55.9906	-63.3594	-63.0094	-63.2094	-57.1437	-60.25	-56.6719	-56.6406
		0.06	2.44	-61.5719	-52.4594	-52.5	-61.9	-61.5594	-62.4281	-61.3031	-61.9156	-56.15	-63.4094	-63.1125	-63.2406	-57.325	-60.3187	-56.775	-56.8688
		0.06	2.46	-61.5281	-52.5969	-52.6188	-61.8594	-61.7	-62.3969	-61.4656	-61.8594	-56.275	-63.3594	-63.0719	-63.1906	-57.4188	-60.4656	-56.8875	-56.9813
		0.06	2.48	-61.6188	-52.675	-52.7875	-61.8281	-61.9219	-62.3312	-61.6	-61.8531	-56.2906	-63.3656	-63.0438	-63.1656	-57.5875	-60.5281	-57.0875	-57.075
		0.06	2.5	-61.6281	-52.775	-52.8688	-61.7938	-61.9344	-62.3688	-61.7781	-61.9313	-56.425	-63.4031	-63.1	-63.2094	-57.7188	-60.5344	-57.2719	-57.2594
		0.06	2.52	-61.5219	-52.9344	-52.9	-61.8	-61.8875	-62.3063	-61.875	-61.9437	-56.4469	-63.4562	-63.0687	-63.1937	-57.8563	-60.6437	-57.3812	-57.4594
		0.06	2.54	-61.6344	-53.0344	-53.0312	-61.7469	-61.9437	-62.2438	-61.9	-61.9719	-56.7062	-63.4906	-63.0344	-63.1625	-58.0469	-60.7562	-57.5531	-57.5594
		0.06	2.56	-61.625	-53.0875	-53.1375	-61.7406	-61.95	-62.3187	-61.9313	-62.0938	-56.7594	-63.5469	-63.1	-63.2156	-58.1875	-60.8125	-57.6531	-57.6625
		0.06	2.58	-61.6	-53.2125	-53.1844	-61.7938	-62.0312	-62.3688	-61.9531	-62.0938	-56.8563	-63.6406	-63.15	-63.2	-58.3	-60.8531	-57.7469	-57.7844
		0.06	2.6	-61.7094	-53.3531	-53.2719	-61.7313	-61.9406	-62.3406	-61.9125	-62.075	-56.9156	-63.65	-63.1344	-63.175	-58.4437	-60.95	-57.9406	-57.9156
		0.06	2.62	-61.7812	-53.3812	-53.4156	-61.7719	-61.8781	-62.3625	-61.95	-62.1406	-56.95	-63.6	-63.1625	-63.25	-58.575	-61.0844	-58.0375	-58
		0.06	2.64	-61.75	-53.5031	-53.5219	-61.8031	-61.9031	-62.3656	-61.9719	-62.1312	-57.1031	-63.6937	-63.2344	-63.2938	-58.6188	-61.0812	-58.1281	-58.1781
		0.06	2.66	-61.7687	-53.6312	-53.5938	-61.7656	-61.8875	-62.3344	-61.9094	-62.1937	-57.1063	-63.75	-63.2188	-63.2375	-58.6937	-61.1562	-58.225	-58.3156
		0.06	2.68	-61.8469	-53.6375	-53.7406	-61.7687	-61.95	-62.4156	-61.85	-62.2875	-57.1625	-63.7844	-63.2625	-63.2656	-58.8656	-61.2906	-58.325	-58.3531
		0.06	2.7	-61.8594	-53.7531	-53.8906	-61.8969	-61.8812	-62.4969	-61.8844	-62.3125	-57.2687	-63.8375	-63.35	-63.3406	-59.0062	-61.35	-58.45	-58.45
		0.06	2.72	-61.8812	-53.875	-53.8688	-61.9	-61.8656	-62.4906	-61.9313	-62.3219	-57.35	-63.9188	-63.3219	-63.3375	-59.0594	-61.3344	-58.5938	-58.5938
		0.06	2.74	-61.9875	-53.9344	-54.0219	-61.925	-61.9437	-62.3875	-61.85	-62.3844	-57.3688	-63.95	-63.3125	-63.3563	-59.1688	-61.4469	-58.6781	-58.6813
		0.06	2.76	-62.0187	-54.0156	-54.1437	-62	-61.8563	-62.5312	-61.8469	-62.3812	-57.4531	-63.9594	-63.4188	-63.4281	-59.3156	-61.5469	-58.7531	-58.75
		0.06	2.78	-62.0438	-54.1437	-54.1969	-62.0094	-61.95	-62.6531	-61.8594	-62.4469	-57.4656	-64	-63.4781	-63.4437	-59.2188	-61.6	-58.875	-58.9094
		0.06	2.8	-62.0969	-54.1688	-54.2406	-62	-62.0125	-62.6	-61.8094	-62.5375	-57.5187	-64.0469	-63.4188	-63.4844	-59.4031	-61.5938	-59.0031	-59.0094
		0.06	2.82	-62.1719	-54.2188	-54.4	-62.0031	-61.9219	-62.7406	-61.7906	-62.4938	-57.65	-64.0938	-63.5156	-63.6188	-59.6937	-61.6844	-59.0656	-59.05
		0.06	2.84	-62.1844	-54.3125	-54.5125	-62.0125	-61.9469	-62.7406	-61.8438	-62.5438	-57.6625	-64.1125	-63.5656	-63.5938	-59.6219	-61.7687	-59.15	-59.0875
		0.06	2.86	-62.2125	-54.35	-54.5094	-61.85	-61.9625	-62.7	-61.8438	-62.6406	-57.6094	-64.1656	-63.5687	-63.6469	-59.7375	-61.7625	-59.275	-59.2594
		0.06	2.88	-62.3406	-54.3469	-54.5781	-62.0438	-61.9562	-62.9344	-61.85	-62.65	-57.7375	-64.2312	-63.65	-63.7094	-59.8656	-61.7938	-59.3063	-59.35
		0.06	2.9	-62.3719	-54.4906	-54.7125	-62.1562	-61.9406	-62.8656	-61.9062	-62.6594	-57.8187	-64.3375	-63.7687	-63.7438	-59.9219	-61.875	-59.4156	-59.3781
		0.06	2.92	-62.4	-54.5812	-54.7062	-62.0812	-62.05	-62.8719	-61.9594	-62.7906	-57.85	-64.3344	-63.7687	-63.7219	-59.9531	-61.9531	-59.5187	-59.5031
		0.06	2.94	-62.5344	-54.6094	-54.7875	-62.1937	-61.9781	-62.9406	-61.95	-62.7875	-57.9562	-64.425	-63.7687	-63.8656	-60.0844	-61.9844	-59.5844	-59.6156
		0.06	2.96	-62.5906	-54.65	-54.8812	-62.2687	-61.9125	-63.0031	-61.9813	-62.9844	-58.0406	-64.5344	-63.8625	-63.9	-60.15	-62.05	-59.65	-59.6531
		0.06	2.98	-62.5875	-54.7594	-54.9938	-62.2375	-62.0469	-63.05	-62.0781	-62.9844	-58.0312	-64.5469	-63.9	-63.9188	-60.1719	-62.1312	-59.85	-59.7438
		0.06	3	-62.7188	-54.7656	-55.025	-62.2844	-62.0687	-63.0969	-62.025	-62.9594	-58.1063	-64.55	-63.9688	-63.9875	-60.3	-62.1813	-59.8688	-59.8375
		0.06	3.02	-62.7344	-54.8344	-55.1	-62.3031	-62.0844	-63.225	-62.0219	-63.0281	-58.2313	-64.65	-64.0625	-64.0906	-60.4031	-62.1219	-59.9094	-59.9344
		0.06	3.04	-62.7	-54.9688	-55.1969	-62.4188	-62.2	-63.1813	-62.1344	-63.0812	-58.2375	-64.7219	-64.1062	-64.1375	-60.4125	-62.1844	-60.0563	-59.925
		0.06	3.06	-62.75	-55.0156	-55.2469	-62.4	-62.225	-63.2812	-62.225	-63.15	-58.2219	-64.7531	-64.0938	-64.15	-60.5344	-62.3187	-60.1	-60.0062
		0.06	3.08	-62.875	-55.0844	-55.3156	-62.5219	-62.1969	-63.3969	-62.1937	-63.1937	-58.4062	-64.7844	-64.1781	-64.2188	-60.6094	-62.3438	-60.2	-60.1031
		0.06	3.1	-62.8219	-55.1531	-55.4625	-62.5	-62.2656	-63.3719	-62.2406	-63.2562	-58.4469	-64.8906	-64.2469	-64.2625	-60.6	-62.3375	-60.2687	-60.1406
		0.06	3.12	-62.9594	-55.2781	-55.4813	-62.5219	-62.2969	-63.4406	-62.3344	-63.35	-58.4281	-64.9906	-64.2281	-64.2688	-60.7125	-62.3812	-60.3438	-60.1469
		0.06	3.14	-63.0187	-55.2281	-55.4688	-62.675	-62.3219	-63.525	-62.375	-63.3344	-58.5031	-65.0062	-64.2844	-64.3938	-60.8	-62.4688	-60.35	-60.2438
		0.06	3.16	-63.0812	-55.2406	-55.5906	-62.7062	-62.3937	-63.55	-62.4344	-63.4125	-58.5563	-65.0375	-64.3688	-64.4656	-60.825	-62.475	-60.5	-60.325
		0.06	3.18	-63.0406	-55.5312	-55.725	-62.7062	-62.45	-63.6156	-62.5	-63.475	-58.6063	-65.1719	-64.4094	-64.4656	-60.8438	-62.4437	-60.5281	-60.3156
		0.06	3.2	-63.0875	-55.4188	-55.6844	-62.7375	-62.4344	-63.6813	-62.6125	-63.45	-58.6625	-65.2188	-64.3812	-64.5344	-60.9813	-62.5438	-60.5563	-60.3625
		0.06	3.22	-63.1594	-55.5156	-55.7375	-62.7875	-62.5156	-63.7844	-62.625	-63.5625	-58.7875	-65.2156	-64.5	-64.6219	-60.975	-62.6031	-60.6625	-60.4875
		0.06	3.24	-63.1437	-55.6688	-55.8063	-62.8312	-62.5812	-63.7594	-62.6469	-63.6281	-58.7687	-65.3063	-64.6281	-64.6438	-60.9375	-62.6094	-60.7594	-60.5875
		0.06	3.26	-63.1781	-55.6312	-55.8312	-62.825	-62.6	-63.8063	-62.7625	-63.6875	-58.8094	-65.3281	-64.55	-64.6312	-61.1	-62.6094	-60.7687	-60.6344
		0.06	3.28	-63.2562	-55.725	-55.825	-62.9281	-62.6375	-63.8594	-62.8219	-63.6688	-58.9281	-65.3781	-64.6188	-64.7469	-61.1219	-62.65	-60.85	-60.7
		0.06	3.3	-63.2781	-55.8469	-55.9562	-62.9313	-62.7125	-63.8656	-62.825	-63.7313	-58.9156	-65.4406	-64.7937	-64.7844	-61.1469	-62.7313	-60.9406	-60.7625
		0.06	3.32	-63.3187	-55.9062	-56.0531	-63.0094	-62.7406	-63.925	-62.9031	-63.7531	-58.9625	-65.575	-64.7656	-64.7812	-61.2	-62.725	-60.9094	-60.7375
		0.06	3.34	-63.4906	-55.8719	-56.0875	-63.0844	-62.8219	-64.0594	-62.975	-63.7906	-59.0687	-65.6438	-64.8313	-64.9469	-61.2594	-62.7719	-60.9781	-60.7719
		0.06	3.36	-63.5312	-55.9094	-56.0938	-63.1063	-62.925	-64.1156	-62.9625	-63.9594	-59.1156	-65.5875	-64.9219	-64.9969	-61.2656	-62.875	-61.0625	-60.8625
		0.06	3.38	-63.4875	-56.0156	-56.2	-63.1406	-62.9375	-64.1406	-63.05	-63.9562	-59.0875	-65.6687	-64.95	-65.0062	-61.2781	-62.875	-61.0656	-60.9156
		0.06	3.4	-63.6	-56	-56.2344	-63.25	-62.9719	-64.275	-63.15	-63.9656	-59.1844	-65.7406	-64.9906	-65.0844	-61.3906	-62.8563	-61.0656	-60.9
		0.06	3.42	-63.7062	-56.1344	-56.175	-63.2687	-63.0375	-64.35	-63.2156	-64.0687	-59.2438	-65.7688	-65.1094	-65.1656	-61.3875	-62.8844	-61.0781	-60.9875
		0.06	3.44	-63.7031	-56.1656	-56.2438	-63.2844	-63.0594	-64.2937	-63.1625	-64.1125	-59.2438	-65.7875	-65.2094	-65.2219	-61.3656	-62.9219	-61.2031	-61.1063
		0.06	3.46	-63.6937	-56.1281	-56.3469	-63.4	-63.0875	-64.4219	-63.2625	-64.1094	-59.3156	-65.8719	-65.1438	-65.2375	-61.4969	-62.9562	-61.3	-61.075
		0.06	3.48	-63.7719	-56.1813	-56.3719	-63.45	-63.1813	-64.4375	-63.3719	-64.2344	-59.4344	-65.975	-65.1687	-65.3625	-61.55	-62.9437	-61.325	-61.1063
		0.06	3.5	-63.7969	-56.2906	-56.3438	-63.4188	-63.2125	-64.4437	-63.3625	-64.2781	-59.3875	-65.9375	-65.2344	-65.4	-61.5	-62.9688	-61.4406	-61.225
		0.06	3.52	-63.7594	-56.2875	-56.4375	-63.5094	-63.2344	-64.5094	-63.375	-64.2875	-59.4281	-65.95	-65.2531	-65.4	-61.575	-63.0906	-61.4156	-61.2656
		0.06	3.54	-63.8594	-56.3	-56.4781	-63.6219	-63.2906	-64.5906	-63.4844	-64.3406	-59.55	-66.05	-65.3313	-65.45	-61.65	-63	-61.4375	-61.2719
		0.06	3.56	-63.9	-56.4	-56.4531	-63.5438	-63.3781	-64.6	-63.5219	-64.4187	-59.5531	-66.1312	-65.4062	-65.5312	-61.6437	-63.0375	-61.5687	-61.3219
		0.06	3.58	-63.8969	-56.3969	-56.525	-63.6469	-63.3844	-64.5844	-63.55	-64.4	-59.5719	-66.1156	-65.4688	-65.4938	-61.6688	-63.0844	-61.4906	-61.325
		0.06	3.6	-63.9281	-56.3812	-56.6156	-63.75	-63.4531	-64.6906	-63.5625	-64.4719	-59.675	-66.2094	-65.4812	-65.6031	-61.7344	-63.1312	-61.5687	-61.3875
		0.06	3.62	-64.025	-56.525	-56.5719	-63.7094	-63.5156	-64.7219	-63.6688	-64.5437	-59.6906	-66.2812	-65.4844	-65.775	-61.7156	-63.0875	-61.6375	-61.4125
		0.06	3.64	-64.0813	-56.5344	-56.5687	-63.7406	-63.5719	-64.7375	-63.6906	-64.5344	-59.7031	-66.3	-65.6	-65.7969	-61.7594	-63.1063	-61.6406	-61.4625
		0.06	3.66	-64.0656	-56.55	-56.6406	-63.8156	-63.5344	-64.8469	-63.7219	-64.5844	-59.7438	-66.3281	-65.6156	-65.7594	-61.9	-63.175	-61.675	-61.4969
		0.06	3.68	-64.1719	-56.6406	-56.75	-63.9031	-63.7062	-64.925	-63.8187	-64.6562	-59.8469	-66.4563	-65.7188	-65.8344	-61.9188	-63.1562	-61.7625	-61.5062
		0.06	3.7	-64.2	-56.7562	-56.7062	-63.8656	-63.75	-64.9187	-63.8187	-64.6344	-59.8375	-66.4594	-65.7875	-65.9094	-61.8688	-63.1656	-61.7812	-61.5469
		0.06	3.72	-64.2063	-56.7313	-56.7562	-63.9594	-63.7656	-64.9812	-63.7875	-64.6781	-59.8531	-66.4625	-65.7594	-65.8938	-61.9719	-63.2469	-61.7281	-61.6
		0.06	3.74	-64.2469	-56.7719	-56.8438	-63.9969	-63.8344	-65.05	-63.8625	-64.7781	-59.8812	-66.575	-65.8	-65.9125	-61.9625	-63.2969	-61.8156	-61.6906
		0.06	3.76	-64.3125	-56.85	-56.8219	-64.0312	-63.9	-65.0437	-64.0281	-64.7969	-59.9562	-66.675	-65.85	-66.0375	-61.975	-63.2625	-61.8875	-61.6344
		0.06	3.78	-64.3031	-56.8344	-56.85	-64.0813	-63.9344	-65.0781	-63.9719	-64.8594	-59.9281	-66.6719	-65.9	-65.9969	-62.0156	-63.25	-61.8469	-61.6312
		0.06	3.8	-64.3	-56.85	-56.9594	-64.1469	-63.9344	-65.1906	-63.9938	-64.9281	-59.9688	-66.7	-65.9344	-66.0375	-62.0844	-63.3	-61.9844	-61.6719
		0.06	3.82	-64.3562	-56.9031	-56.9781	-64.1656	-64.0469	-65.2094	-64.1375	-64.9187	-60.0969	-66.7781	-65.975	-66.1219	-62.1031	-63.3	-61.975	-61.7188
		0.06	3.84	-64.3688	-56.9406	-56.9344	-64.1438	-64.0219	-65.1844	-64.2156	-64.925	-60.0969	-66.7937	-66.0875	-66.1594	-62.1	-63.25	-61.9875	-61.7094
		0.06	3.86	-64.375	-56.925	-57.0156	-64.3	-64.0344	-65.2812	-64.2156	-65.0062	-60.0812	-66.8125	-66.0969	-66.1438	-62.1969	-63.3063	-62.0125	-61.7469
		0.06	3.88	-64.4125	-56.9562	-57.0969	-64.325	-64.1219	-65.3531	-64.2719	-65.05	-60.1969	-66.9094	-66.15	-66.1813	-62.2062	-63.2781	-62.1125	-61.8
		0.06	3.9	-64.5062	-57.05	-57.0406	-64.2875	-64.1937	-65.3594	-64.425	-65.0531	-60.25	-66.9375	-66.2031	-66.2688	-62.1844	-63.2625	-62.1094	-61.8312
		0.06	3.92	-64.475	-57.0406	-57.0531	-64.3438	-64.1813	-65.3594	-64.4156	-65.125	-60.1531	-66.9125	-66.225	-66.2781	-62.2687	-63.35	-62.0969	-61.8031
		0.06	3.94	-64.4781	-57.0531	-57.1469	-64.4437	-64.3063	-65.4594	-64.4	-65.15	-60.1937	-66.9812	-66.175	-66.3406	-62.2938	-63.4156	-62.2125	-61.85
		0.06	3.96	-64.5375	-57.1437	-57.15	-64.3969	-64.3781	-65.4656	-64.5062	-65.1906	-60.3219	-66.9969	-66.3125	-66.4	-62.2781	-63.3469	-62.2375	-61.9094
		0.06	3.98	-64.55	-57.1312	-57.0875	-64.4375	-64.3688	-65.45	-64.55	-65.2406	-60.2812	-67.0375	-66.3938	-66.3781	-62.2812	-63.3594	-62.2062	-61.9062
		0.06	4	-64.575	-57.1063	-57.1625	-64.5	-64.4313	-65.5875	-64.5312	-65.3406	-60.3	-67.1375	-66.3969	-66.4125	-62.3906	-63.4375	-62.25	-61.9156
		0.06	4.02	-64.6156	-57.1781	-57.2812	-64.5125	-64.55	-65.575	-64.5594	-65.3313	-60.375	-67.1531	-66.4	-66.5031	-62.3844	-63.4313	-62.3031	-61.9906
		0.06	4.04	-64.7063	-57.2625	-57.2656	-64.5469	-64.5437	-65.6	-64.6625	-65.3469	-60.35	-67.1188	-66.45	-66.5625	-62.3719	-63.4	-62.2938	-61.9875
		0.06	4.06	-64.7562	-57.2125	-57.2438	-64.6156	-64.5969	-65.6687	-64.7	-65.4469	-60.3469	-67.1875	-66.4	-66.5437	-62.4625	-63.475	-62.3531	-61.9062
		0.06	4.08	-64.75	-57.2219	-57.3156	-64.6844	-64.6312	-65.6937	-64.6625	-65.5	-60.4219	-67.3	-66.45	-66.65	-62.4906	-63.4813	-62.4094	-61.9656
		0.06	4.1	-64.8281	-57.2469	-57.3531	-64.6312	-64.65	-65.6625	-64.7625	-65.4469	-60.4344	-67.2531	-66.5094	-66.7031	-62.475	-63.45	-62.3656	-62.0375
		0.06	4.12	-64.8844	-57.2812	-57.35	-64.675	-64.6844	-65.6687	-64.8406	-65.5094	-60.4156	-67.275	-66.5875	-66.6969	-62.5344	-63.4906	-62.3625	-62.05
		0.06	4.14	-64.85	-57.3219	-57.3344	-64.7438	-64.7781	-65.75	-64.8156	-65.5469	-60.4938	-67.3375	-66.5625	-66.7219	-62.5812	-63.4938	-62.4531	-62.0812
		0.06	4.16	-64.9	-57.4	-57.3906	-64.75	-64.8313	-65.8281	-64.8187	-65.6062	-60.5656	-67.3	-66.5687	-66.8406	-62.5687	-63.4375	-62.4313	-62.1281
		0.06	4.18	-64.9375	-57.375	-57.425	-64.75	-64.7844	-65.8187	-64.8688	-65.6	-60.5125	-67.3344	-66.6719	-66.8438	-62.5094	-63.4969	-62.4594	-62.1719
		0.06	4.2	-64.9469	-57.3563	-57.4125	-64.8531	-64.8625	-65.875	-64.9125	-65.7	-60.5062	-67.425	-66.6531	-66.8844	-62.6063	-63.5281	-62.5563	-62.1219
		0.06	4.22	-64.8906	-57.4375	-57.4437	-64.8719	-64.9906	-65.9375	-64.9125	-65.6875	-60.5406	-67.4094	-66.7	-66.8313	-62.6406	-63.4906	-62.5969	-62.1
		0.06	4.24	-65.0125	-57.5062	-57.5031	-64.8906	-64.9875	-65.9469	-64.95	-65.6906	-60.6	-67.4719	-66.7594	-66.9	-62.5906	-63.525	-62.5344	-62.1969
		0.06	4.26	-65.025	-57.4656	-57.5375	-64.975	-64.9313	-65.9437	-65	-65.75	-60.5938	-67.4844	-66.7656	-66.9219	-62.6594	-63.5156	-62.5219	-62.2094
		0.06	4.28	-65.0406	-57.475	-57.5031	-64.9906	-65	-66.025	-64.9969	-65.7625	-60.6188	-67.4812	-66.75	-66.925	-62.7375	-63.5312	-62.6094	-62.2
		0.06	4.3	-65.0875	-57.5406	-57.5625	-65.0188	-65.0625	-66.0469	-65.0656	-65.7688	-60.6437	-67.5594	-66.8406	-66.9906	-62.675	-63.575	-62.5656	-62.1813
		0.06	4.32	-65.1937	-57.5469	-57.6125	-65.0437	-65.0844	-66.0469	-65.0969	-65.85	-60.6	-67.55	-66.9062	-67.0781	-62.6937	-63.5438	-62.5844	-62.2938
		0.06	4.34	-65.1875	-57.5	-57.5812	-65.0687	-65.1	-66.1125	-65.1594	-65.8781	-60.6437	-67.5312	-66.8969	-67.0563	-62.7594	-63.4844	-62.6437	-62.2875
		0.06	4.36	-65.1469	-57.5156	-57.6094	-65.0719	-65.1656	-66.125	-65.1594	-65.9062	-60.7281	-67.6	-66.9406	-67.0813	-62.7344	-63.5344	-62.6562	-62.2687
		0.06	4.38	-65.1719	-57.5594	-57.6625	-65.0938	-65.1594	-66.1188	-65.2812	-65.8562	-60.7625	-67.7094	-67.0312	-67.125	-62.6906	-63.5344	-62.6312	-62.3063
		0.06	4.4	-65.2438	-57.5344	-57.6844	-65.1813	-65.1906	-66.1656	-65.35	-65.9156	-60.7313	-67.6719	-67.0281	-67.1094	-62.8	-63.5125	-62.6875	-62.3625
		0.06	4.42	-65.2375	-57.6094	-57.6375	-65.2	-65.2969	-66.25	-65.3313	-65.9313	-60.7344	-67.675	-67.0437	-67.1656	-62.7938	-63.5875	-62.7281	-62.3531
		0.06	4.44	-65.1781	-57.625	-57.7031	-65.1656	-65.3219	-66.2344	-65.3531	-65.8875	-60.7687	-67.725	-67.1	-67.2031	-62.7375	-63.5812	-62.7094	-62.3563
		0.06	4.46	-65.3125	-57.6156	-57.7687	-65.1656	-65.35	-66.2594	-65.4313	-66.0156	-60.7656	-67.6594	-67.1375	-67.2	-62.7812	-63.5563	-62.7344	-62.4625
		0.06	4.48	-65.3344	-57.6031	-57.7625	-65.2812	-65.4094	-66.3406	-65.4406	-66.1062	-60.8	-67.7438	-67.1312	-67.2438	-62.875	-63.6094	-62.7656	-62.4719
		0.06	4.5	-65.2937	-57.6937	-57.7594	-65.3187	-65.4656	-66.3688	-65.425	-66.0719	-60.8781	-67.7531	-67.175	-67.2438	-62.8281	-63.5938	-62.7906	-62.4562
		0.06	4.52	-65.3594	-57.7313	-57.8063	-65.3063	-65.4594	-66.375	-65.475	-66.0844	-60.8625	-67.7312	-67.2188	-67.3406	-62.85	-63.525	-62.8125	-62.4813
		0.06	4.54	-65.3812	-57.7	-57.8344	-65.3906	-65.4625	-66.3719	-65.5625	-66.1625	-60.8531	-67.7781	-67.25	-67.3187	-62.9344	-63.5938	-62.8375	-62.5219
		0.06	4.56	-65.3875	-57.7656	-57.8438	-65.4094	-65.5687	-66.4437	-65.55	-66.1375	-60.9375	-67.8	-67.2812	-67.3438	-62.9062	-63.5469	-62.8531	-62.5187
		0.06	4.58	-65.425	-57.8187	-57.8344	-65.3719	-65.5594	-66.45	-65.5125	-66.1719	-61.0031	-67.7688	-67.3531	-67.425	-62.875	-63.5938	-62.8125	-62.5187
		0.06	4.6	-65.4812	-57.7812	-57.9219	-65.3969	-65.5563	-66.4563	-65.5563	-66.2562	-60.9844	-67.8844	-67.3812	-67.4156	-62.9188	-63.6125	-62.9062	-62.5344
		0.06	4.62	-65.5062	-57.7656	-57.9531	-65.4844	-65.6312	-66.4969	-65.5719	-66.2438	-60.9562	-67.8656	-67.325	-67.4062	-62.9625	-63.6281	-62.8906	-62.55
		0.06	4.64	-65.4313	-57.8375	-57.95	-65.4594	-65.675	-66.475	-65.5969	-66.2406	-61.0281	-67.8781	-67.4031	-67.4313	-62.9531	-63.5938	-62.9031	-62.5469
		0.06	4.66	-65.4875	-57.8594	-57.9531	-65.4688	-65.675	-66.4656	-65.6781	-66.325	-61.0375	-67.9313	-67.4594	-67.5344	-62.9594	-63.6188	-62.9562	-62.4938
		0.06	4.68	-65.5625	-57.7906	-58.0062	-65.5188	-65.6844	-66.5031	-65.8094	-66.3594	-61.0438	-67.9375	-67.4375	-67.5125	-62.9844	-63.6	-63.0469	-62.5156
		0.06	4.7	-65.5375	-57.8594	-58.0406	-65.6	-65.7781	-66.5938	-65.8187	-66.3	-61.125	-67.925	-67.3875	-67.5312	-62.9875	-63.6375	-62.9969	-62.5781
		0.06	4.72	-65.5219	-57.9	-57.9813	-65.6062	-65.7937	-66.6125	-65.8094	-66.3187	-61.1375	-68.0125	-67.475	-67.6031	-62.9469	-63.675	-63.0219	-62.5969
		0.06	4.74	-65.6281	-57.8781	-58.0344	-65.5938	-65.75	-66.6219	-65.8781	-66.4469	-61.0844	-67.9969	-67.5375	-67.675	-62.9469	-63.625	-63.075	-62.5687
		0.06	4.76	-65.6719	-57.8625	-58.0406	-65.6312	-65.8562	-66.6656	-65.8812	-66.4062	-61.125	-68.0188	-67.5031	-67.6062	-62.9875	-63.6312	-63.1031	-62.625
		0.06	4.78	-65.6188	-57.9313	-58.0219	-65.625	-65.8875	-66.7188	-65.8844	-66.425	-61.1406	-68.0719	-67.5469	-67.6406	-62.9688	-63.6719	-63.0469	-62.6531
		0.06	4.8	-65.6656	-57.9156	-58.0062	-65.5938	-65.875	-66.6594	-65.9375	-66.4844	-61.1406	-68.0594	-67.6469	-67.6906	-62.9188	-63.6156	-63.0687	-62.6281
		0.06	4.82	-65.7188	-57.9156	-58.05	-65.6344	-65.85	-66.7156	-66.0031	-66.4875	-61.0812	-68.175	-67.6562	-67.6656	-63.0406	-63.6875	-63.1031	-62.6344
		0.06	4.84	-65.7469	-57.9594	-58.075	-65.6969	-65.9219	-66.7656	-66.0406	-66.5	-61.1125	-68.2063	-67.6125	-67.6625	-63.0531	-63.7062	-63.0687	-62.6594
		0.06	4.86	-65.7281	-58.0281	-58.1094	-65.6875	-65.9625	-66.7656	-66.05	-66.5	-61.1844	-68.175	-67.7	-67.6937	-62.9969	-63.6906	-63.0938	-62.6688
		0.06	4.88	-65.7812	-58.0062	-58.0875	-65.7469	-65.9688	-66.7937	-66.0531	-66.5656	-61.175	-68.3094	-67.6719	-67.7656	-63.05	-63.7844	-63.15	-62.6156
		0.06	4.9	-65.7688	-57.9906	-58.1937	-65.8375	-66.0656	-66.8781	-66.1031	-66.6562	-61.15	-68.25	-67.6438	-67.7656	-63.075	-63.7812	-63.125	-62.6813
		0.06	4.92	-65.75	-58.0781	-58.1937	-65.8281	-66.0875	-66.9344	-66.1375	-66.5875	-61.2375	-68.2438	-67.6531	-67.75	-63.025	-63.7906	-63.05	-62.7562
		0.06	4.94	-65.7688	-58.0687	-58.1781	-65.7937	-66.0375	-66.875	-66.075	-66.6719	-61.2375	-68.3	-67.7188	-67.8187	-63.05	-63.8187	-63.0781	-62.7625
		0.06	4.96	-65.8187	-58.0219	-58.1844	-65.8531	-66.1469	-66.8875	-66.0719	-66.6906	-61.1656	-68.325	-67.7219	-67.85	-63.1156	-63.7844	-63.1406	-62.7188
		0.06	4.98	-65.7937	-58.0719	-58.1969	-65.85	-66.1813	-66.9875	-66.1844	-66.6687	-61.2	-68.35	-67.7	-67.8094	-63.1219	-63.7719	-63.15	-62.7781
		0.16	0	-61.1125	-61.1312	-60.3094	-60.1094	-62.1063	-61.525	-61.9688	-61.6875	-63.5844	-63.05	-63.5687	-63.8906	-65.075	-65.2688	-64.2625	-65.9
		0.16	0.02	-61.1406	-61.1437	-60.3969	-60.05	-62.0781	-61.4938	-61.9188	-61.7406	-63.5594	-63.0969	-63.625	-63.875	-65.075	-65.2719	-64.3156	-65.9094
		0.16	0.04	-61.15	-61.0938	-60.3656	-60.0656	-62.125	-61.5219	-61.9719	-61.7406	-63.525	-63.0844	-63.675	-63.9344	-65.1344	-65.3688	-64.2531	-65.8844
		0.16	0.06	-61.125	-61.0906	-60.2719	-60.1594	-62.1281	-61.5062	-62.0312	-61.6531	-63.5187	-63.05	-63.6	-63.9062	-65.1	-65.275	-64.225	-65.875
		0.16	0.08	-61.1719	-61.15	-60.3625	-60.1031	-62.0594	-61.4875	-62.0125	-61.725	-63.5875	-63.0438	-63.5906	-63.95	-65.0813	-65.2094	-64.2781	-65.925
		0.16	0.1	-61.1562	-61.15	-60.35	-60.025	-62.1156	-61.5094	-61.9781	-61.7531	-63.525	-63.0875	-63.675	-63.9844	-65.1562	-65.2312	-64.3	-65.9125
		0.16	0.12	-61.1125	-61.0906	-60.3281	-60.0375	-62.1437	-61.4969	-62.0656	-61.7	-63.55	-63.05	-63.575	-64	-65.1531	-65.2906	-64.2281	-65.8625
		0.16	0.14	-61.1375	-61.0938	-60.3531	-60.0719	-62.1125	-61.45	-62.0344	-61.7188	-63.5594	-63.0656	-63.5312	-63.9656	-65.0938	-65.2906	-64.3187	-65.8844
		0.16	0.16	-61.1469	-61.1969	-60.3531	-60.0281	-62.0687	-61.4938	-61.975	-61.8187	-63.5125	-63.1375	-63.6	-63.9906	-65.1125	-65.2375	-64.3031	-65.9
		0.16	0.18	-61.1281	-61.1562	-60.3625	-59.9625	-62.1063	-61.5906	-61.9938	-61.7313	-63.5094	-63.1	-63.55	-63.9562	-65.1312	-65.2719	-64.2688	-65.8187
		0.16	0.2	-61.1813	-61.1094	-60.3469	-59.9938	-62.0844	-61.5406	-62.0219	-61.7875	-63.5656	-63.0312	-63.5344	-63.8937	-65.0625	-65.2344	-64.3438	-65.8344
		0.16	0.22	-60.8219	-60.7969	-59.9594	-59.6531	-61.6813	-61.1437	-61.6281	-61.4813	-63.1875	-62.6906	-63.2375	-63.6	-64.7375	-64.9219	-64.0656	-65.5625
		0.16	0.24	-63.175	-63.2188	-62.3688	-62.0719	-64.15	-63.5812	-63.9875	-63.8125	-65.675	-65.2875	-65.7844	-66.15	-67.0844	-67.25	-66.2875	-67.8
		0.16	0.26	-67.3	-67.2812	-66.4656	-66.1	-68.1687	-67.6094	-68.0719	-67.8031	-70.0563	-69.575	-70.0375	-70.4906	-70.9969	-71.1875	-70.2375	-71.6469
		0.16	0.28	-68.3219	-68.2937	-67.5156	-67.2281	-69.2562	-68.6719	-69.1438	-68.95	-71.1625	-70.7438	-71.2375	-71.6813	-72.0906	-72.3187	-71.3938	-72.8719
		0.16	0.3	-67.7438	-67.7688	-66.9563	-66.7156	-68.7219	-68.1344	-68.5469	-68.325	-70.5	-70.1813	-70.625	-71.0656	-71.6531	-71.8719	-70.9437	-72.4906
		0.16	0.32	-66.7469	-66.7469	-65.9688	-65.6406	-67.7469	-67.1562	-67.55	-67.3812	-69.35	-69	-69.4313	-69.825	-70.6469	-70.9062	-69.925	-71.4
		0.16	0.34	-65.6625	-65.6687	-64.9156	-64.55	-66.6562	-66.0563	-66.5219	-66.325	-68.125	-67.7281	-68.1844	-68.5938	-69.5594	-69.8219	-68.9031	-70.3344
		0.16	0.36	-64.7562	-64.6937	-63.9562	-63.675	-65.7219	-65.1219	-65.5813	-65.3469	-67.05	-66.6937	-67.1719	-67.5813	-68.6094	-68.8313	-67.8844	-69.4469
		0.16	0.38	-64.0375	-64	-63.1969	-62.9	-65.0312	-64.4031	-64.8125	-64.6375	-66.25	-65.875	-66.3875	-66.6937	-67.9187	-68.1	-67.1687	-68.6562
		0.16	0.4	-63.4219	-63.4	-62.6188	-62.3063	-64.4281	-63.8438	-64.2656	-64.0687	-65.6844	-65.3094	-65.7531	-66.1156	-67.2625	-67.5625	-66.6438	-68.025
		0.16	0.42	-62.95	-62.95	-62.15	-61.8781	-63.975	-63.35	-63.825	-63.6094	-65.2281	-64.8031	-65.2781	-65.7	-66.75	-67.075	-66.1562	-67.5875
		0.16	0.44	-62.6219	-62.6125	-61.8563	-61.5906	-63.6688	-63.025	-63.4656	-63.3156	-64.8656	-64.4781	-64.9656	-65.3	-66.5031	-66.7688	-65.8719	-67.3281
		0.16	0.46	-62.3375	-62.3625	-61.5938	-61.2969	-63.4906	-62.8406	-63.2594	-63.1188	-64.6531	-64.2688	-64.7531	-65.0406	-66.2406	-66.5594	-65.6937	-67.0406
		0.16	0.48	-62.1219	-62.1469	-61.4062	-61.0594	-63.2	-62.6	-62.9969	-62.8531	-64.3281	-64.0469	-64.4875	-65.0156	-66.0281	-66.3	-65.4375	-66.8
		0.16	0.5	-62.0781	-62.0469	-61.275	-60.9344	-63.0219	-62.4219	-62.7531	-62.6875	-64.0719	-63.9062	-64.3688	-64.8156	-65.8531	-66.125	-65.2812	-66.6469
		0.16	0.52	-61.9844	-61.9281	-61.1813	-60.9	-62.9125	-62.3	-62.6312	-62.5844	-63.975	-63.7875	-64.2812	-64.5719	-65.7812	-65.9969	-65.2281	-66.5781
		0.16	0.54	-61.8094	-61.8125	-61.025	-60.7406	-62.8	-62.1906	-62.5625	-62.4375	-63.8	-63.7094	-64.1531	-64.6156	-65.6281	-65.9344	-65.0906	-66.45
		0.16	0.56	-61.7313	-61.6656	-61.0531	-60.6281	-62.6437	-62.0438	-62.5031	-62.3719	-63.55	-63.575	-64.0531	-64.4406	-65.4844	-65.8156	-64.9375	-66.4
		0.16	0.58	-61.6125	-61.5875	-60.9781	-60.55	-62.5656	-61.9813	-62.3781	-62.375	-63.4656	-63.55	-64.025	-64.35	-65.475	-65.7531	-64.95	-66.35
		0.16	0.6	-61.5281	-61.5563	-60.8344	-60.5344	-62.5281	-61.9406	-62.3812	-62.225	-63.375	-63.5	-64	-64.3438	-65.4187	-65.7156	-64.8469	-66.2844
		0.16	0.62	-61.5469	-61.4594	-60.7875	-60.4375	-62.45	-61.8438	-62.3344	-62.1562	-63.2313	-63.4094	-63.9125	-64.25	-65.3375	-65.625	-64.75	-66.15
		0.16	0.64	-61.5125	-61.45	-60.7938	-60.3688	-62.3781	-61.8125	-62.2625	-62.125	-63.1437	-63.425	-63.8375	-64.2	-65.3	-65.5375	-64.775	-66.1625
		0.16	0.66	-61.45	-61.475	-60.6719	-60.4406	-62.4	-61.8438	-62.2219	-62.075	-63.15	-63.375	-63.8	-64.1687	-65.3156	-65.5719	-64.7469	-66.1625
		0.16	0.68	-61.4656	-61.375	-60.6844	-60.4813	-62.3781	-61.7875	-62.2313	-62.0438	-63.0281	-63.3563	-63.8312	-64.2094	-65.25	-65.55	-64.6562	-66.125
		0.16	0.7	-61.3875	-61.3281	-60.6656	-60.3656	-62.3	-61.6875	-62.15	-62.0469	-63.0125	-63.3375	-63.775	-64.0781	-65.1844	-65.4656	-64.6906	-66.0781
		0.16	0.72	-61.3219	-61.3625	-60.5844	-60.325	-62.2594	-61.7188	-62.0344	-61.9906	-62.9719	-63.3312	-63.8187	-64.0781	-65.225	-65.4313	-64.6594	-66.05
		0.16	0.74	-61.35	-61.3281	-60.5406	-60.3344	-62.3344	-61.7219	-62.0844	-62.0438	-62.9406	-63.3469	-63.8406	-64.1625	-65.1906	-65.4656	-64.6125	-66.0375
		0.16	0.76	-61.3438	-61.2875	-60.55	-60.3344	-62.3312	-61.6531	-62.1375	-62.05	-62.8625	-63.2969	-63.7469	-64.075	-65.1469	-65.4062	-64.5906	-65.9375
		0.16	0.78	-61.2438	-61.3531	-60.4938	-60.2	-62.2438	-61.5938	-62.1219	-61.9469	-62.825	-63.2094	-63.675	-64.0625	-65.0813	-65.4	-64.6469	-65.9219
		0.16	0.8	-61.2781	-61.3219	-60.4906	-60.2375	-62.2562	-61.5938	-62.0719	-61.8969	-62.85	-63.2531	-63.7687	-64.1719	-65.1062	-65.3906	-64.6125	-66.0156
		0.16	0.82	-61.2438	-61.2438	-60.5469	-60.3156	-62.2938	-61.6344	-62.1188	-61.9562	-62.7562	-63.2656	-63.7438	-64.1062	-65.0656	-65.4156	-64.5719	-65.9719
		0.16	0.84	-61.1625	-61.2531	-60.5219	-60.2875	-62.2594	-61.6	-62.0563	-61.925	-62.7844	-63.2125	-63.6625	-64.0687	-65.025	-65.3844	-64.6562	-65.9219
		0.16	0.86	-61.1875	-61.2281	-60.4938	-60.275	-62.1813	-61.575	-62.0469	-61.925	-62.8125	-63.2	-63.6594	-64.1156	-65.0563	-65.3688	-64.625	-65.95
		0.16	0.88	-61.2469	-61.1937	-60.5594	-60.25	-62.2781	-61.5687	-62.05	-61.95	-62.775	-63.225	-63.7	-64.1344	-65.0656	-65.4	-64.6	-65.9563
		0.16	0.9	-61.1719	-61.225	-60.5312	-60.2313	-62.2531	-61.5719	-62.0812	-61.8937	-62.7219	-63.2594	-63.6656	-64.0875	-65.0125	-65.3938	-64.6438	-65.9313
		0.16	0.92	-61.2281	-61.1969	-60.4969	-60.1906	-62.2	-61.4688	-62.025	-61.8344	-62.8	-63.1875	-63.6469	-64.0938	-64.9969	-65.3406	-64.5813	-65.9062
		0.16	0.94	-61.2594	-61.1344	-60.5219	-60.1969	-62.2281	-61.5625	-62.0187	-61.8844	-62.7844	-63.2375	-63.7188	-64.1	-65.0312	-65.3375	-64.5656	-65.9344
		0.16	0.96	-61.2	-61.2	-60.5	-60.2625	-62.2469	-61.6094	-62.0656	-61.85	-62.7656	-63.2406	-63.725	-64.05	-65.0312	-65.3875	-64.6312	-65.8812
		0.16	0.98	-61.1969	-61.1875	-60.4469	-60.2062	-62.2125	-61.5469	-62.0312	-61.8312	-62.8	-63.1969	-63.6469	-64.0563	-65	-65.35	-64.6156	-65.7781
		0.16	1	-61.1625	-61.1344	-60.5125	-60.1625	-62.1562	-61.5781	-62	-61.8688	-62.825	-63.15	-63.6156	-64.0469	-65.025	-65.3344	-64.5	-65.7344
		0.16	1.02	-61.1344	-61.25	-60.5719	-60.25	-62.2344	-61.7	-62.0812	-61.95	-62.7219	-63.15	-63.6437	-63.975	-65.025	-65.3844	-64.5281	-65.6875
		0.16	1.04	-61.1875	-61.3937	-60.6844	-60.3563	-62.3344	-61.7906	-62.1562	-62.05	-62.6344	-63.0312	-63.5062	-63.8594	-64.9594	-65.3438	-64.5062	-65.5594
		0.16	1.06	-61.3	-61.5625	-60.8438	-60.4156	-62.3812	-61.9938	-62.1937	-62.2812	-62.5875	-62.8812	-63.3844	-63.75	-64.9313	-65.3	-64.3562	-65.4563
		0.16	1.08	-61.3219	-61.8156	-61.0187	-60.5812	-62.4875	-62.2687	-62.3156	-62.4969	-62.5312	-62.7875	-63.2687	-63.5125	-64.9844	-65.3219	-64.3719	-65.425
		0.16	1.1	-61.4281	-62.0344	-61.15	-60.7469	-62.7	-62.4938	-62.5	-62.6094	-62.4594	-62.7469	-63.2156	-63.275	-64.95	-65.4156	-64.4219	-65.4656
		0.16	1.12	-61.6375	-62.25	-61.3656	-60.9375	-62.8219	-62.65	-62.6063	-62.9062	-62.4906	-62.6	-63.0875	-63.2	-64.9281	-65.4969	-64.375	-65.4187
		0.16	1.14	-61.8625	-62.5875	-61.5594	-61.1844	-62.9531	-62.9	-62.6844	-63.15	-62.5094	-62.4437	-63.0469	-63.0312	-65.0281	-65.5813	-64.45	-65.475
		0.16	1.16	-61.95	-62.7844	-61.7594	-61.4375	-63.0594	-63.1625	-62.8	-63.3187	-62.5	-62.3875	-63	-62.8438	-65.125	-65.7469	-64.4844	-65.5813
		0.16	1.18	-62.2094	-62.9594	-61.9906	-61.6406	-63.1813	-63.2719	-62.9	-63.5594	-62.5625	-62.3781	-62.9	-62.7781	-65.1687	-65.8438	-64.4469	-65.65
		0.16	1.2	-62.4	-63.175	-62.1281	-61.8281	-63.225	-63.4156	-62.9656	-63.775	-62.5563	-62.3625	-62.7469	-62.6125	-65.2438	-65.8562	-64.4	-65.6562
		0.16	1.22	-62.5219	-63.1906	-62.2438	-62.0375	-63.2313	-63.4719	-63.0094	-63.9188	-62.4219	-62.2344	-62.5969	-62.35	-65.3375	-65.8781	-64.2875	-65.7156
		0.16	1.24	-62.6094	-63.1875	-62.3563	-62.1375	-63.2156	-63.3875	-63.0625	-63.9656	-62.2781	-62.1437	-62.4344	-62.1625	-65.2594	-65.8	-64.0375	-65.7812
		0.16	1.26	-62.6813	-63.0781	-62.3937	-62.1	-63.0812	-63.1813	-62.9437	-63.9625	-62.1688	-61.975	-62.1312	-61.8	-65.1094	-65.575	-63.7562	-65.7906
		0.16	1.28	-62.5563	-62.7344	-62.2156	-61.9875	-62.875	-62.9719	-62.6844	-63.7812	-61.9094	-61.6188	-61.7094	-61.2219	-64.85	-65.1562	-63.3937	-65.65
		0.16	1.3	-62.3063	-62.3438	-62.0719	-61.675	-62.5	-62.6094	-62.3187	-63.4594	-61.5469	-61.1625	-61.1719	-60.5969	-64.4594	-64.7375	-62.975	-65.4594
		0.16	1.32	-61.9469	-61.7938	-61.7656	-61.1469	-62.025	-62.0563	-61.8187	-62.9844	-61.2125	-60.5219	-60.5625	-59.95	-63.8625	-64.2	-62.475	-65.2094
		0.16	1.34	-61.2594	-61.0219	-61.3406	-60.5531	-61.3656	-61.3906	-61.0875	-62.3344	-60.7969	-59.6219	-59.6781	-59.0687	-63.1781	-63.4781	-61.9406	-64.6781
		0.16	1.36	-60.5	-60.1594	-60.9031	-59.7906	-60.4938	-60.6312	-60.2281	-61.5781	-60.2812	-58.55	-58.8	-58.0844	-62.475	-62.6688	-61.3063	-63.9938
		0.16	1.38	-59.6469	-59.1156	-60.3937	-58.8906	-59.65	-59.6875	-59.3312	-60.725	-59.7344	-57.4969	-57.9219	-57.1156	-61.7	-61.85	-60.5062	-63.25
		0.16	1.4	-58.75	-57.9344	-59.7188	-57.9688	-58.725	-58.6437	-58.4156	-59.8063	-59.1594	-56.35	-57.0375	-56.0375	-60.875	-60.9406	-59.725	-62.4969
		0.16	1.42	-57.7594	-56.7938	-59.0375	-57.0438	-57.6813	-57.5719	-57.4094	-58.7969	-58.5	-55.1781	-56.125	-54.9062	-60.1063	-59.95	-59.0062	-61.6781
		0.16	1.44	-56.8625	-55.5719	-58.4062	-56.0563	-56.6844	-56.4625	-56.4062	-57.8594	-57.7844	-54.0969	-55.2625	-53.8719	-59.425	-59.1156	-57.95	-60.8312
		0.16	1.46	-56.0531	-54.3594	-57.7375	-55.25	-55.75	-55.275	-55.4406	-56.8375	-57.0375	-53.1656	-54.55	-52.95	-58.6281	-58.3125	-57.225	-60.1
		0.16	1.48	-55.1844	-53.2687	-57.1437	-54.4813	-54.8125	-54.2313	-54.3937	-55.8156	-56.2719	-52.2094	-53.75	-52.05	-57.8187	-57.55	-56.4531	-59.5094
		0.16	1.5	-54.3563	-52.1344	-56.6937	-53.7188	-53.9375	-53.275	-53.4156	-54.925	-55.4375	-51.375	-53.0062	-51.2844	-57.1906	-56.8031	-55.5844	-58.9219
		0.16	1.52	-53.7594	-51.0906	-56.2	-53.1406	-53.1937	-52.3344	-52.5844	-54.0969	-54.6469	-50.7719	-52.3469	-50.6969	-56.6312	-56.2625	-54.9219	-58.45
		0.16	1.54	-53.1594	-50.1969	-55.7719	-52.5812	-52.5469	-51.4062	-51.7125	-53.2344	-53.9719	-50.2625	-51.7812	-50.0219	-56.0219	-55.7781	-54.2906	-58.1188
		0.16	1.56	-52.425	-49.2812	-55.5	-51.9781	-51.8563	-50.6813	-50.8156	-52.4969	-53.3	-49.7625	-51.2406	-49.4219	-55.4813	-55.2969	-53.7156	-57.7438
		0.16	1.58	-51.9406	-48.3719	-55.0875	-51.5594	-51.2938	-50.0187	-50.0719	-51.9094	-52.6531	-49.4062	-50.7875	-48.9469	-55.1344	-54.9	-53.2031	-57.3688
		0.16	1.6	-51.2969	-47.3063	-54.7062	-51.0938	-50.8812	-49.25	-49.3094	-51.4031	-52.2156	-49.0687	-50.4	-48.3094	-54.7625	-54.5687	-52.75	-57.1281
		0.16	1.62	-50.7687	-45.4688	-54.45	-50.6156	-50.4906	-48.3125	-48.1094	-50.8937	-51.7156	-48.6875	-50.0406	-47.2469	-54.425	-54.3031	-52.3844	-56.9313
		0.16	1.64	-50.3094	-42.5875	-54.2031	-50.2438	-50.0125	-46.7812	-46.0094	-50.5344	-51.2	-48.3625	-49.7094	-45.2719	-54.15	-53.9656	-52.0281	-56.7969
		0.16	1.66	-49.8125	-38.5531	-53.8875	-49.8531	-49.6344	-44.0406	-42.7906	-50.1437	-50.9344	-47.8063	-49.5156	-41.9688	-54.0219	-53.7094	-51.7875	-56.6531
		0.16	1.68	-49.3094	-32.8719	-53.6594	-49.4844	-49.3063	-40.0656	-38.3	-49.7344	-50.7406	-46.5938	-49.3312	-37.275	-53.7906	-53.5906	-51.575	-56.5687
		0.16	1.7	-48.8312	-25.3594	-53.4938	-49.1844	-48.5469	-34.7687	-32.1063	-49.2531	-50.4156	-44.2094	-49.1437	-31.1156	-53.6312	-53.3594	-51.325	-56.5625
		0.16	1.72	-48.2281	-16.2437	-53.2875	-48.8844	-46.9969	-27.55	-23.8625	-48.775	-50.2125	-40.5125	-48.9781	-22.7938	-53.5125	-53.2313	-51.1625	-56.4469
		0.16	1.74	-46.9875	-7	-53.1719	-48.55	-44.4313	-18.4688	-14.4594	-47.9437	-50.1156	-35.5344	-48.7906	-12.7219	-53.475	-53.1219	-51.0344	-56.3875
		0.16	1.76	-44.9469	0.975	-53.1156	-48.325	-40.725	-9.00625	-5.33437	-45.975	-49.975	-28.7906	-48.6437	-2.7	-53.35	-53.0594	-50.9	-56.4062
		0.16	1.78	-41.8469	6.77187	-52.9813	-47.975	-35.55	-0.59375	2.3125	-43.0844	-49.7656	-19.7281	-48.2562	5.61562	-53.2781	-52.9469	-50.6375	-56.4
		0.16	1.8	-37.3688	9.7	-52.925	-47.2781	-28.45	5.71875	7.3375	-38.8094	-49.7	-9.49687	-47.3281	11.1594	-53.275	-52.8844	-50.5219	-56.3312
		0.16	1.82	-31.425	9.60625	-52.9219	-45.9	-19.6437	9.16562	9.30625	-32.9281	-49.6688	0.1	-45.35	13.2844	-53.3312	-52.875	-50.2406	-56.3719
		0.16	1.84	-23.6219	7.03125	-52.8281	-43.3812	-10.2156	9.46875	8.325	-25.225	-49.575	7.65625	-42.0812	11.9469	-53.3344	-52.8531	-49.3563	-56.4437
		0.16	1.86	-14.4281	2.575	-52.8375	-39.7562	-1.59375	7.07812	5.05312	-15.8438	-49.5406	12.1938	-37.5281	7.9375	-53.3688	-52.8	-47.6875	-56.5
		0.16	1.88	-5.37813	-3.33437	-52.825	-34.9	5.0625	2.7	-0.06875	-6.55937	-49.5969	13.2156	-31.4937	2.09375	-53.4719	-52.8219	-44.9344	-56.5031
		0.16	1.9	2.25	-10.0188	-52.8031	-28.2781	8.80937	-3.09687	-6.40938	1.30313	-49.6375	11.0656	-23.3563	-5.10938	-53.55	-52.9188	-40.8875	-56.5687
		0.16	1.92	7.44688	-16.9125	-52.725	-19.8875	9.59375	-9.7625	-13.2125	6.85938	-49.575	6.45	-13.4156	-12.8562	-53.575	-52.9813	-35.575	-56.7438
		0.16	1.94	9.91875	-23.7031	-52.7656	-10.7594	7.74062	-16.8406	-20.1844	9.50313	-49.5719	0.13125	-3.375	-20.5594	-53.6781	-53.0187	-28.4188	-56.7938
		0.16	1.96	9.475	-29.9719	-52.6562	-2.15625	3.73125	-23.6812	-26.8469	9.15938	-49.5844	-7.26562	5.01875	-27.8563	-53.8063	-53.0875	-19.375	-56.8531
		0.16	1.98	6.45625	-35.5156	-52.65	4.60625	-1.89062	-29.9688	-32.8312	6.2125	-49.5	-15.1187	10.7594	-34.45	-53.9031	-53.1875	-9.76875	-56.9125
		0.16	2	1.80313	-40.35	-52.8937	8.77812	-8.375	-35.7	-38.05	1.50625	-49.4625	-22.7188	13.1562	-40.1063	-53.9406	-53.2281	-1.17188	-57.0156
		0.16	2.02	-4.25313	-44.3875	-52.8031	10.1	-15.2625	-40.6344	-42.6094	-4.59688	-49.4969	-29.7687	12.15	-44.8	-54.1	-53.2844	5.3375	-57.075
		0.16	2.04	-11.025	-47.8375	-52.7938	8.58125	-22.1562	-44.825	-46.4062	-11.475	-49.5062	-36.0469	8.28125	-48.7281	-54.225	-53.3781	9.1	-57.1375
		0.16	2.06	-18.0219	-50.7156	-52.8031	4.9	-28.6313	-48.2812	-49.5312	-18.4594	-49.4281	-41.4938	2.5	-51.9406	-54.2812	-53.4531	9.77188	-57.2594
		0.16	2.08	-24.6719	-52.9688	-52.9	-0.353125	-34.4125	-51.1719	-52.125	-25.2313	-49.5094	-45.975	-4.52187	-54.4531	-54.3781	-53.45	7.5875	-57.3312
		0.16	2.1	-30.8594	-54.8625	-52.9313	-6.71562	-39.3969	-53.5438	-54.2781	-31.4625	-49.5687	-49.65	-12.2844	-56.5	-54.5563	-53.4938	3.275	-57.3406
		0.16	2.12	-36.2781	-56.4062	-52.9375	-13.5312	-43.7625	-55.3812	-55.9437	-36.9594	-49.5969	-52.6937	-20.0875	-58.1469	-54.6594	-53.6125	-2.54063	-57.4
		0.16	2.14	-40.9281	-57.5312	-53.0656	-20.4	-47.3844	-56.95	-57.2938	-41.6188	-49.6219	-55.0438	-27.2969	-59.3625	-54.75	-53.7344	-9.3875	-57.5219
		0.16	2.16	-44.9	-58.5375	-53.0969	-26.8906	-50.3625	-58.2	-58.4219	-45.6688	-49.75	-56.9437	-33.8219	-60.2969	-54.9	-53.7719	-16.6063	-57.5875
		0.16	2.18	-48.2469	-59.2812	-53.0812	-32.7	-52.7687	-59.2	-59.3438	-49.0281	-49.8688	-58.5125	-39.4562	-61.1094	-55.1344	-53.8906	-23.6344	-57.575
		0.16	2.2	-50.9156	-59.8187	-53.1875	-37.8719	-54.8281	-59.9313	-59.9906	-51.6781	-49.9031	-59.6813	-44.2875	-61.7	-55.2313	-54.0969	-30.2875	-57.65
		0.16	2.22	-53.1281	-60.3344	-53.2281	-42.3469	-56.4719	-60.5187	-60.5	-53.9375	-50.0781	-60.5406	-48.175	-62.0938	-55.35	-54.1469	-36.2094	-57.775
		0.16	2.24	-55.0062	-60.6844	-53.275	-46.0281	-57.7438	-61.0031	-61.0125	-55.8063	-50.2375	-61.2906	-51.3781	-62.4969	-55.4906	-54.1875	-41.2344	-57.875
		0.16	2.26	-56.3688	-60.975	-53.4125	-49.1531	-58.825	-61.3531	-61.3469	-57.2	-50.35	-61.8812	-54.0438	-62.7	-55.6656	-54.3563	-45.6312	-57.8469
		0.16	2.28	-57.5219	-61.2031	-53.5062	-51.7812	-59.65	-61.55	-61.5094	-58.3219	-50.4062	-62.2656	-56.075	-62.8312	-55.75	-54.525	-49.3375	-57.9813
		0.16	2.3	-58.5062	-61.275	-53.5312	-53.8594	-60.325	-61.7812	-61.725	-59.2719	-50.5875	-62.5875	-57.6719	-62.9969	-55.9375	-54.6469	-52.325	-58.0563
		0.16	2.32	-59.2	-61.3406	-53.5844	-55.5812	-60.7562	-61.9562	-61.9031	-59.9656	-50.8	-62.85	-59.0031	-63.0781	-56.1	-54.7344	-54.7469	-58.1063
		0.16	2.34	-59.7281	-61.475	-53.7094	-56.9813	-61.075	-62.0281	-61.9875	-60.4656	-50.9188	-63.0187	-60.0812	-63.1031	-56.2844	-54.8812	-56.7781	-58.1906
		0.16	2.36	-60.1844	-61.5	-53.7969	-58.0156	-61.425	-62.0719	-61.9906	-60.9	-51.05	-63.1125	-60.8406	-63.0906	-56.3875	-55.0563	-58.3906	-58.35
		0.16	2.38	-60.5687	-61.5	-53.8438	-58.9375	-61.6625	-62.15	-62.0625	-61.2	-51.2375	-63.2562	-61.4656	-63.1406	-56.5	-55.1344	-59.675	-58.4813
		0.16	2.4	-60.725	-61.5719	-53.9719	-59.625	-61.7875	-62.15	-62.1312	-61.3844	-51.3812	-63.3	-61.9594	-63.1969	-56.6688	-55.2719	-60.7687	-58.5656
		0.16	2.42	-60.8937	-61.525	-54.0031	-60.1125	-61.9437	-62.1406	-62.05	-61.6	-51.5219	-63.25	-62.3688	-63.1906	-56.8406	-55.4406	-61.6562	-58.6344
		0.16	2.44	-61.075	-61.4875	-54.075	-60.6281	-62.0563	-62.1312	-62.05	-61.7625	-51.7125	-63.2875	-62.5875	-63.2062	-56.9594	-55.6188	-62.275	-58.7781
		0.16	2.46	-61.1188	-61.5	-54.2	-60.9437	-62.1	-62.1406	-62.1094	-61.8187	-51.8969	-63.325	-62.7938	-63.1844	-57.1	-55.7469	-62.7719	-58.8719
		0.16	2.48	-61.1281	-61.525	-54.2969	-61.15	-62.075	-62.15	-62.1719	-61.8906	-52.0312	-63.2344	-62.9625	-63.1656	-57.2938	-55.85	-63.2219	-58.8906
		0.16	2.5	-61.2031	-61.5062	-54.3187	-61.3625	-62.1312	-62.1	-62.1219	-61.9906	-52.1688	-63.2219	-63.0281	-63.1437	-57.4281	-56.0563	-63.55	-59.0156
		0.16	2.52	-61.1688	-61.5469	-54.4531	-61.475	-62.1937	-62.0969	-62.0906	-61.9562	-52.3906	-63.2594	-63.0844	-63.1844	-57.5125	-56.125	-63.7344	-59.1625
		0.16	2.54	-61.1188	-61.5375	-54.5656	-61.5687	-62.2125	-62.1219	-62.1969	-61.9688	-52.5	-63.2	-63.2094	-63.1437	-57.6531	-56.2625	-63.9938	-59.2156
		0.16	2.56	-61.1437	-61.475	-54.6094	-61.6375	-62.2281	-62.1125	-62.1281	-61.9594	-52.6312	-63.1813	-63.1813	-63.1625	-57.8063	-56.4219	-64.2156	-59.3125
		0.16	2.58	-61.0969	-61.5344	-54.6844	-61.6688	-62.2156	-62.0469	-62.0656	-61.9156	-52.7625	-63.2	-63.1594	-63.1906	-57.875	-56.5625	-64.2937	-59.4875
		0.16	2.6	-60.95	-61.55	-54.8375	-61.7188	-62.2375	-62.0563	-62.0563	-61.85	-52.9781	-63.1469	-63.175	-63.1688	-57.9656	-56.7	-64.3656	-59.5719
		0.16	2.62	-60.9	-61.5938	-54.8375	-61.6719	-62.1344	-62.0906	-62.125	-61.8875	-53.1219	-63.1344	-63.1688	-63.1188	-58.1437	-56.7281	-64.4875	-59.5969
		0.16	2.64	-60.9594	-61.5938	-54.8937	-61.6656	-62.0969	-62.075	-62.0625	-61.9	-53.2562	-63.1844	-63.0687	-63.2125	-58.3	-56.9281	-64.5	-59.7313
		0.16	2.66	-60.9219	-61.6063	-55.0406	-61.6781	-62.1219	-62.0094	-62.1094	-61.8781	-53.4562	-63.1625	-63.05	-63.2844	-58.3656	-57.0625	-64.4625	-59.8719
		0.16	2.68	-60.9094	-61.5875	-55.0594	-61.7313	-62.1188	-62.0438	-62.175	-61.9188	-53.6	-63.1719	-63.1281	-63.25	-58.5	-57.1375	-64.5312	-59.9156
		0.16	2.7	-60.9688	-61.65	-55.0781	-61.6281	-62.0281	-62.0531	-62.1844	-61.9219	-53.6406	-63.2344	-63.0969	-63.275	-58.6063	-57.2656	-64.5687	-60.0031
		0.16	2.72	-60.9375	-61.6656	-55.1813	-61.6219	-62.1188	-61.9844	-62.2	-61.8281	-53.8469	-63.1969	-63.1188	-63.3094	-58.7188	-57.3937	-64.5094	-60.1375
		0.16	2.74	-60.8844	-61.6531	-55.2781	-61.6344	-62.2156	-61.9562	-62.2344	-61.8812	-53.9844	-63.1813	-63.1562	-63.3406	-58.7781	-57.5	-64.5375	-60.225
		0.16	2.76	-60.95	-61.7562	-55.3187	-61.6094	-62.1063	-62.0687	-62.3094	-61.8844	-54.1063	-63.2562	-63.1312	-63.3688	-58.8875	-57.6188	-64.5406	-60.2687
		0.16	2.78	-60.9969	-61.7375	-55.425	-61.65	-62.0625	-62.025	-62.3375	-61.8937	-54.2406	-63.2938	-63.1188	-63.4406	-59.0094	-57.7656	-64.5563	-60.3969
		0.16	2.8	-60.9219	-61.7469	-55.5375	-61.5969	-62.1719	-62.0438	-62.35	-61.8937	-54.3875	-63.3219	-63.2125	-63.4625	-59.0844	-57.9094	-64.5656	-60.4875
		0.16	2.82	-60.9406	-61.8063	-55.5469	-61.5656	-62.1562	-62.1125	-62.4281	-61.9062	-54.5438	-63.4219	-63.1813	-63.4594	-59.1813	-57.9406	-64.6062	-60.5563
		0.16	2.84	-61.0219	-61.8969	-55.5687	-61.6375	-62.1312	-62.2094	-62.5062	-61.9375	-54.6406	-63.4375	-63.1437	-63.5969	-59.325	-58.0375	-64.6156	-60.7
		0.16	2.86	-61.05	-61.8875	-55.6469	-61.6562	-62.25	-62.15	-62.5094	-61.9313	-54.7188	-63.4562	-63.2406	-63.6656	-59.4813	-58.2438	-64.5719	-60.7938
		0.16	2.88	-61.0438	-61.975	-55.6813	-61.5938	-62.3031	-62.2156	-62.55	-61.9844	-54.8781	-63.55	-63.2188	-63.6437	-59.5031	-58.3	-64.5969	-60.8187
		0.16	2.9	-61.15	-62.0125	-55.7594	-61.6594	-62.2969	-62.3281	-62.5938	-62.0438	-54.9656	-63.5563	-63.1594	-63.7	-59.6156	-58.4125	-64.6156	-60.9625
		0.16	2.92	-61.1875	-62.0406	-55.8594	-61.6	-62.3219	-62.3125	-62.7	-62.0156	-55.0187	-63.6312	-63.2344	-63.75	-59.7469	-58.5594	-64.6125	-61.025
		0.16	2.94	-61.1688	-62.1219	-55.9062	-61.6	-62.4375	-62.325	-62.7469	-62.0875	-55.1188	-63.6813	-63.2844	-63.825	-59.7969	-58.65	-64.6062	-61.0031
		0.16	2.96	-61.2188	-62.1562	-55.9219	-61.65	-62.4656	-62.3937	-62.7875	-62.1281	-55.2531	-63.7	-63.2906	-63.825	-59.8375	-58.7156	-64.6875	-61.1125
		0.16	2.98	-61.3375	-62.1656	-56.0062	-61.6188	-62.4688	-62.4719	-62.8969	-62.1437	-55.3594	-63.8	-63.3875	-63.8656	-59.9594	-58.9	-64.7188	-61.2156
		0.16	3	-61.3125	-62.2625	-56.0969	-61.6	-62.5187	-62.4125	-62.8844	-62.1719	-55.45	-63.8563	-63.4469	-63.9625	-60.1063	-58.9531	-64.7344	-61.2344
		0.16	3.02	-61.3438	-62.2687	-56.1688	-61.6813	-62.525	-62.5094	-62.9219	-62.275	-55.575	-63.8656	-63.4437	-63.9375	-60.1562	-58.9969	-64.7562	-61.3094
		0.16	3.04	-61.4656	-62.2469	-56.2	-61.6281	-62.475	-62.5719	-62.9938	-62.3031	-55.6656	-63.9375	-63.5469	-64.0437	-60.2031	-59.1156	-64.8406	-61.3625
		0.16	3.06	-61.4469	-62.3344	-56.2562	-61.6562	-62.6	-62.5625	-63.1219	-62.3125	-55.7094	-63.9188	-63.6	-64.1719	-60.3563	-59.25	-64.8063	-61.3969
		0.16	3.08	-61.4469	-62.3688	-56.275	-61.6875	-62.65	-62.5969	-63.1625	-62.4281	-55.7969	-63.9562	-63.5969	-64.1906	-60.3281	-59.3	-64.85	-61.4844
		0.16	3.1	-61.5312	-62.375	-56.275	-61.7	-62.6562	-62.725	-63.2313	-62.475	-55.9531	-64.0687	-63.675	-64.225	-60.4031	-59.3844	-64.9563	-61.55
		0.16	3.12	-61.575	-62.45	-56.3875	-61.75	-62.7812	-62.7156	-63.3281	-62.4344	-56.0219	-64.125	-63.7438	-64.275	-60.5563	-59.4625	-64.9688	-61.55
		0.16	3.14	-61.6	-62.525	-56.4594	-61.8625	-62.8344	-62.725	-63.3969	-62.5406	-56.0469	-64.1594	-63.7313	-64.325	-60.6344	-59.4844	-65.0188	-61.6688
		0.16	3.16	-61.625	-62.55	-56.4219	-61.8125	-62.8844	-62.8563	-63.4344	-62.5844	-56.1719	-64.2312	-63.8281	-64.3438	-60.6562	-59.5969	-65.0625	-61.7094
		0.16	3.18	-61.7062	-62.5938	-56.5406	-61.85	-62.925	-62.8344	-63.4656	-62.5938	-56.25	-64.2469	-63.8563	-64.3906	-60.7031	-59.7344	-65.1562	-61.7313
		0.16	3.2	-61.7188	-62.625	-56.6063	-61.95	-63.0625	-62.8781	-63.5625	-62.65	-56.3063	-64.325	-63.8625	-64.4938	-60.7812	-59.7406	-65.175	-61.8312
		0.16	3.22	-61.7156	-62.675	-56.5812	-61.9813	-63	-63	-63.5906	-62.7406	-56.35	-64.3969	-63.9688	-64.55	-60.7438	-59.8781	-65.175	-61.8688
		0.16	3.24	-61.85	-62.7687	-56.6031	-62.0187	-63.1188	-63	-63.6312	-62.7781	-56.4969	-64.3938	-63.9625	-64.5719	-60.8531	-59.975	-65.25	-61.8812
		0.16	3.26	-61.9062	-62.8344	-56.6625	-62.0812	-63.1844	-63.0219	-63.7687	-62.8312	-56.5687	-64.5062	-63.9813	-64.6969	-60.9406	-59.9875	-65.3	-61.9906
		0.16	3.28	-61.8969	-62.8531	-56.6844	-62.0781	-63.1844	-63.1125	-63.7438	-62.975	-56.5969	-64.6156	-64.0813	-64.7875	-60.9469	-60.075	-65.2562	-62.0594
		0.16	3.3	-61.9969	-62.9437	-56.7281	-62.1094	-63.3	-63.1531	-63.825	-63.05	-56.6469	-64.5344	-64.1062	-64.7875	-61.025	-60.1719	-65.3313	-62.0625
		0.16	3.32	-62.075	-62.9875	-56.7625	-62.2094	-63.3937	-63.175	-63.9313	-63.0312	-56.8156	-64.6125	-64.1875	-64.825	-61.1031	-60.1937	-65.4281	-62.1656
		0.16	3.34	-62.0969	-63.0344	-56.7906	-62.2375	-63.4375	-63.2906	-64	-63.0594	-56.8438	-64.6719	-64.2781	-64.9719	-61.1125	-60.2938	-65.4406	-62.2156
		0.16	3.36	-62.1156	-63.1	-56.7875	-62.2375	-63.475	-63.3469	-64.0125	-63.1469	-56.8969	-64.7156	-64.2562	-65.0062	-61.1969	-60.3281	-65.4437	-62.275
		0.16	3.38	-62.2219	-63.1437	-56.8312	-62.3094	-63.5219	-63.3719	-64.1125	-63.2344	-56.9938	-64.8313	-64.3406	-64.9969	-61.2406	-60.35	-65.5156	-62.3063
		0.16	3.4	-62.25	-63.1562	-56.9344	-62.3875	-63.5344	-63.425	-64.1281	-63.25	-57.1063	-64.8469	-64.4688	-65.0844	-61.225	-60.4406	-65.5938	-62.3688
		0.16	3.42	-62.25	-63.2219	-56.9625	-62.3937	-63.6125	-63.4688	-64.1844	-63.3094	-57.1219	-64.9281	-64.4344	-65.1594	-61.325	-60.5312	-65.5813	-62.3969
		0.16	3.44	-62.3312	-63.2719	-56.9813	-62.4594	-63.7	-63.4969	-64.2937	-63.35	-57.2188	-64.9812	-64.4719	-65.1219	-61.3969	-60.5906	-65.5813	-62.4625
		0.16	3.46	-62.4125	-63.3	-57.0344	-62.5594	-63.7219	-63.6281	-64.275	-63.4344	-57.2875	-65.0094	-64.6	-65.175	-61.3625	-60.6937	-65.7156	-62.4688
		0.16	3.48	-62.4156	-63.3906	-57.0812	-62.5469	-63.8625	-63.65	-64.2688	-63.4969	-57.3656	-65.0563	-64.5781	-65.2594	-61.45	-60.7469	-65.7375	-62.5
		0.16	3.5	-62.4844	-63.4406	-57.0812	-62.6406	-63.9437	-63.7094	-64.3719	-63.5656	-57.3656	-65.1031	-64.6469	-65.3219	-61.4844	-60.7969	-65.7219	-62.6344
		0.16	3.52	-62.5875	-63.4844	-57.1594	-62.6437	-63.925	-63.7906	-64.4094	-63.5906	-57.4844	-65.1375	-64.7375	-65.3781	-61.4781	-60.9062	-65.8313	-62.6188
		0.16	3.54	-62.6156	-63.5656	-57.2469	-62.6656	-64.0344	-63.8063	-64.4313	-63.6594	-57.5281	-65.1781	-64.7469	-65.4437	-61.575	-60.8937	-65.8625	-62.6813
		0.16	3.56	-62.6781	-63.6	-57.1813	-62.7844	-64.0656	-63.8406	-64.5125	-63.7625	-57.55	-65.3	-64.825	-65.5656	-61.6312	-60.9531	-65.8625	-62.6875
		0.16	3.58	-62.7906	-63.6125	-57.175	-62.825	-64.1031	-63.925	-64.5938	-63.7812	-57.625	-65.3125	-64.8625	-65.5156	-61.6094	-61.05	-65.9187	-62.6562
		0.16	3.6	-62.8406	-63.6156	-57.2531	-62.8906	-64.2188	-63.9562	-64.5437	-63.8	-57.6719	-65.3969	-64.8812	-65.5969	-61.65	-61.1	-66.0281	-62.7125
		0.16	3.62	-62.8156	-63.6813	-57.2875	-62.9688	-64.2469	-63.975	-64.675	-63.8875	-57.7687	-65.4437	-64.9563	-65.7719	-61.7344	-61.1	-66.0687	-62.7969
		0.16	3.64	-62.9	-63.5969	-57.2375	-62.9719	-64.3375	-64.1094	-64.7	-63.9594	-57.725	-65.4688	-65.0062	-65.7969	-61.7656	-61.175	-66.0656	-62.7375
		0.16	3.66	-63.0156	-63.7375	-57.2844	-62.9469	-64.4469	-64.1281	-64.7	-64	-57.7656	-65.525	-65.1	-65.8	-61.8125	-61.2156	-66.0844	-62.8125
		0.16	3.68	-63.0062	-63.8312	-57.35	-63.0719	-64.4375	-64.1562	-64.7812	-64.05	-57.8469	-65.5656	-65.1844	-65.8219	-61.85	-61.2406	-66.1844	-62.9125
		0.16	3.7	-63.0656	-63.8844	-57.3469	-63.125	-64.4375	-64.2312	-64.8281	-64.2188	-57.8656	-65.6406	-65.1906	-65.875	-61.8875	-61.3156	-66.2	-62.8625
		0.16	3.72	-63.1344	-63.9469	-57.3875	-63.0938	-64.5687	-64.2	-64.8375	-64.2219	-57.8719	-65.7156	-65.3187	-65.8406	-61.9656	-61.2906	-66.2188	-62.9344
		0.16	3.74	-63.1937	-64.0219	-57.4656	-63.2	-64.5531	-64.2656	-64.975	-64.2	-57.9437	-65.7438	-65.3688	-65.9062	-62.0094	-61.3563	-66.2562	-62.9844
		0.16	3.76	-63.1875	-63.9656	-57.4844	-63.2	-64.6031	-64.3313	-65.0156	-64.275	-57.9906	-65.7312	-65.3719	-66.0094	-62.0312	-61.4219	-66.3125	-62.9875
		0.16	3.78	-63.2625	-64	-57.4688	-63.2344	-64.6562	-64.3344	-64.9844	-64.3281	-58.0594	-65.7875	-65.4469	-66.075	-62.1594	-61.4062	-66.2812	-63.05
		0.16	3.8	-63.3344	-64.0844	-57.4875	-63.3469	-64.6562	-64.3656	-65.0969	-64.35	-58.1125	-65.8313	-65.4344	-66.0563	-62.15	-61.5	-66.3375	-63.0875
		0.16	3.82	-63.35	-64.0094	-57.5656	-63.3469	-64.7344	-64.4313	-65.0813	-64.3781	-58.1656	-65.8219	-65.4437	-66.1219	-62.15	-61.5156	-66.4094	-63.075
		0.16	3.84	-63.3438	-64.0844	-57.575	-63.35	-64.7594	-64.4844	-65.1125	-64.45	-58.2594	-65.8875	-65.5406	-66.2312	-62.2469	-61.5187	-66.45	-63.1594
		0.16	3.86	-63.4437	-64.1781	-57.575	-63.4469	-64.75	-64.5875	-65.1937	-64.5	-58.2438	-65.9281	-65.5875	-66.225	-62.1813	-61.5844	-66.4375	-63.15
		0.16	3.88	-63.5406	-64.1781	-57.6344	-63.55	-64.8531	-64.5687	-65.1969	-64.5437	-58.2594	-65.9875	-65.6312	-66.2375	-62.1719	-61.6437	-66.4906	-63.1156
		0.16	3.9	-63.4906	-64.1875	-57.6063	-63.5719	-64.85	-64.5875	-65.2656	-64.6	-58.3656	-66.0312	-65.7844	-66.2937	-62.2313	-61.6469	-66.5813	-63.1937
		0.16	3.92	-63.575	-64.2719	-57.6188	-63.6281	-64.8625	-64.6875	-65.375	-64.6469	-58.3812	-66.0813	-65.7562	-66.35	-62.2469	-61.7375	-66.5656	-63.2344
		0.16	3.94	-63.6656	-64.3281	-57.6406	-63.6875	-64.9812	-64.6781	-65.3781	-64.6406	-58.4406	-66.0844	-65.7719	-66.3781	-62.3375	-61.75	-66.6	-63.2594
		0.16	3.96	-63.7375	-64.4094	-57.6937	-63.6688	-65.0344	-64.6687	-65.3938	-64.7094	-58.475	-66.175	-65.8719	-66.3688	-62.3969	-61.8219	-66.7156	-63.325
		0.16	3.98	-63.7	-64.3406	-57.6656	-63.8	-64.9875	-64.7875	-65.4906	-64.85	-58.525	-66.1875	-65.8812	-66.5188	-62.3844	-61.925	-66.7625	-63.2906
		0.16	4	-63.7656	-64.375	-57.7094	-63.7938	-65.0719	-64.7719	-65.4719	-64.85	-58.5094	-66.2063	-65.9156	-66.5781	-62.4281	-61.85	-66.7656	-63.325
		0.16	4.02	-63.8719	-64.4	-57.7844	-63.75	-65.1	-64.85	-65.5062	-64.8219	-58.5125	-66.2906	-65.9875	-66.5312	-62.5156	-61.9344	-66.825	-63.375
		0.16	4.04	-63.8719	-64.4219	-57.8063	-63.8688	-65.1781	-64.9094	-65.5437	-64.9094	-58.5938	-66.275	-65.95	-66.5656	-62.4594	-61.9906	-66.8938	-63.3375
		0.16	4.06	-63.9	-64.5469	-57.8	-63.9344	-65.25	-64.9281	-65.5375	-64.9531	-58.6375	-66.2688	-66	-66.6062	-62.4875	-61.9437	-66.8625	-63.3906
		0.16	4.08	-63.975	-64.4531	-57.8531	-63.9313	-65.2406	-65.0062	-65.6281	-64.95	-58.6031	-66.375	-66.075	-66.6469	-62.4938	-62.0094	-66.9	-63.4437
		0.16	4.1	-63.9969	-64.5469	-57.8906	-63.9688	-65.2906	-65.0219	-65.6719	-64.9906	-58.6344	-66.3938	-66.0969	-66.6656	-62.5094	-62.0656	-66.9375	-63.4
		0.16	4.12	-63.9906	-64.6469	-57.8563	-64.0719	-65.3844	-65.0406	-65.6406	-65.05	-58.7406	-66.3969	-66.1844	-66.7531	-62.6031	-62.0438	-67.0062	-63.3906
		0.16	4.14	-64.0563	-64.6062	-57.8781	-64.0531	-65.4	-65.0875	-65.75	-65.0813	-58.7656	-66.4563	-66.25	-66.8219	-62.5687	-62.1281	-66.9781	-63.45
		0.16	4.16	-64.1312	-64.6937	-57.9	-64.0406	-65.4344	-65.1219	-65.7781	-65.0906	-58.75	-66.4563	-66.225	-66.775	-62.5625	-62.1813	-67.0125	-63.4
		0.16	4.18	-64.1375	-64.725	-57.8812	-64.15	-65.5344	-65.0781	-65.75	-65.1656	-58.8219	-66.5094	-66.3125	-66.8375	-62.6281	-62.1844	-67.0844	-63.4281
		0.16	4.2	-64.15	-64.7688	-57.8906	-64.1844	-65.5188	-65.1625	-65.8031	-65.2125	-58.9188	-66.6188	-66.3688	-66.9313	-62.6312	-62.2313	-67.1188	-63.5219
		0.16	4.22	-64.2063	-64.85	-57.9094	-64.175	-65.5563	-65.2281	-65.8469	-65.1687	-58.9	-66.6	-66.2875	-66.9281	-62.6344	-62.275	-67.1188	-63.5125
		0.16	4.24	-64.2531	-64.9031	-57.9625	-64.3187	-65.6125	-65.2594	-65.85	-65.2375	-58.9375	-66.6594	-66.375	-66.925	-62.7438	-62.2656	-67.2	-63.55
		0.16	4.26	-64.2594	-64.8812	-57.9	-64.3438	-65.6844	-65.4	-65.9344	-65.3187	-58.975	-66.7	-66.4594	-67.0156	-62.7469	-62.3531	-67.2188	-63.55
		0.16	4.28	-64.2875	-64.8812	-57.8781	-64.3438	-65.7063	-65.4187	-65.9219	-65.2969	-59.0125	-66.7125	-66.4969	-67.0719	-62.725	-62.3375	-67.2438	-63.5219
		0.16	4.3	-64.3781	-64.9875	-57.9469	-64.4531	-65.7125	-65.3812	-65.9625	-65.2656	-59.05	-66.7469	-66.5094	-67.1219	-62.8	-62.3219	-67.2469	-63.5719
		0.16	4.32	-64.35	-64.975	-58.0219	-64.4844	-65.725	-65.4531	-65.9969	-65.3344	-59.1	-66.8375	-66.5312	-67.1281	-62.75	-62.35	-67.2969	-63.6156
		0.16	4.34	-64.3531	-65.0375	-57.9969	-64.4812	-65.8531	-65.4656	-66.0219	-65.4469	-59.1531	-66.775	-66.5437	-67.2188	-62.7938	-62.2875	-67.3438	-63.5875
		0.16	4.36	-64.4906	-65.0938	-58.0156	-64.5813	-65.875	-65.5	-66.075	-65.4281	-59.1719	-66.85	-66.65	-67.25	-62.825	-62.2438	-67.3187	-63.6562
		0.16	4.38	-64.55	-65.0375	-58.1	-64.6562	-65.9187	-65.5	-66.1375	-65.4281	-59.175	-66.9375	-66.6719	-67.2375	-62.8094	-62.3281	-67.4375	-63.7
		0.16	4.4	-64.5531	-65.1	-58.1188	-64.6031	-65.9563	-65.4688	-66.0875	-65.5375	-59.2438	-66.9062	-66.6562	-67.2844	-62.8281	-62.275	-67.5094	-63.6531
		0.16	4.42	-64.5687	-65.1281	-58.0062	-64.6781	-65.9594	-65.5687	-66.1781	-65.5594	-59.35	-66.9781	-66.7125	-67.3562	-62.8781	-62.2438	-67.4969	-63.675
		0.16	4.44	-64.6406	-65.1875	-58.05	-64.8375	-65.9906	-65.65	-66.25	-65.5437	-59.2781	-67.0875	-66.7156	-67.3906	-62.8563	-62.2875	-67.5406	-63.7031
		0.16	4.46	-64.6719	-65.175	-58.1406	-64.7188	-66.05	-65.6312	-66.2188	-65.5813	-59.3625	-67.0563	-66.7375	-67.375	-62.9313	-62.3063	-67.575	-63.6656
		0.16	4.48	-64.6562	-65.1781	-58.0531	-64.6656	-66.05	-65.6594	-66.3125	-65.65	-59.4156	-67.0687	-66.8375	-67.4094	-62.975	-62.3344	-67.5875	-63.7125
		0.16	4.5	-64.7281	-65.2719	-58.0062	-64.7969	-66.0875	-65.675	-66.35	-65.6312	-59.4437	-67.0687	-66.875	-67.4187	-62.9562	-62.3937	-67.5813	-63.7156
		0.16	4.52	-64.7812	-65.2469	-58.05	-64.7969	-66.225	-65.6844	-66.2969	-65.725	-59.3844	-67.1062	-66.8625	-67.4437	-63	-62.4156	-67.6031	-63.7219
		0.16	4.54	-64.7937	-65.25	-58.1	-64.8281	-66.2375	-65.7312	-66.3969	-65.7438	-59.4813	-67.1188	-66.9375	-67.4688	-62.9938	-62.4281	-67.65	-63.7313
		0.16	4.56	-64.8594	-65.3438	-58.0031	-64.9375	-66.2156	-65.8063	-66.4281	-65.7688	-59.5312	-67.2094	-66.9469	-67.55	-62.9938	-62.4938	-67.625	-63.775
		0.16	4.58	-64.8844	-65.3625	-58.0656	-64.9	-66.3094	-65.7438	-66.4281	-65.7719	-59.5594	-67.2219	-66.9688	-67.5813	-63.0594	-62.4813	-67.5969	-63.7344
		0.16	4.6	-64.9062	-65.3844	-58.125	-64.9437	-66.2594	-65.8187	-66.4719	-65.7781	-59.5781	-67.2438	-67.05	-67.5781	-63.0625	-62.475	-67.7125	-63.7531
		0.16	4.62	-64.8812	-65.4437	-58.1375	-64.9969	-66.3	-65.85	-66.4906	-65.8187	-59.625	-67.2969	-67.0875	-67.5844	-63.0531	-62.5406	-67.7312	-63.8156
		0.16	4.64	-64.9281	-65.4	-58.1	-65.0281	-66.375	-65.8562	-66.5062	-65.7969	-59.5938	-67.3063	-67.05	-67.6469	-63.1125	-62.5625	-67.7594	-63.7656
		0.16	4.66	-64.9938	-65.4156	-58.1688	-65.0156	-66.375	-65.9406	-66.5344	-65.825	-59.6531	-67.3187	-67.1062	-67.6875	-63.15	-62.5312	-67.8063	-63.8438
		0.16	4.68	-64.95	-65.4938	-58.2125	-65.0938	-66.4344	-66.0031	-66.5531	-65.8906	-59.7031	-67.3875	-67.1406	-67.6406	-63.125	-62.6281	-67.8656	-63.9
		0.16	4.7	-65	-65.5156	-58.2	-65.15	-66.5188	-65.9938	-66.55	-65.9688	-59.675	-67.3156	-67.1719	-67.6969	-63.1562	-62.575	-67.9	-63.8531
		0.16	4.72	-65.0594	-65.4812	-58.2094	-65.1	-66.5125	-66.0344	-66.6375	-66	-59.7094	-67.3375	-67.2312	-67.6625	-63.1437	-62.575	-67.9344	-63.8719
		0.16	4.74	-65.0437	-65.5563	-58.25	-65.15	-66.5062	-66.025	-66.6125	-65.975	-59.7719	-67.4313	-67.25	-67.7281	-63.1156	-62.6594	-67.9125	-63.9313
		0.16	4.76	-65.025	-65.5844	-58.3	-65.2188	-66.5906	-65.9656	-66.625	-66.05	-59.7562	-67.4281	-67.2312	-67.7281	-63.15	-62.6719	-67.9688	-63.9188
		0.16	4.78	-65.05	-65.5437	-58.2719	-65.1594	-66.5844	-66.05	-66.7125	-66.0813	-59.75	-67.4469	-67.3	-67.7875	-63.175	-62.6406	-67.9281	-63.9
		0.16	4.8	-65.1375	-65.5906	-58.2469	-65.2031	-66.5969	-66.05	-66.7063	-66.0156	-59.8187	-67.525	-67.3469	-67.8313	-63.175	-62.7406	-67.9313	-63.9313
		0.16	4.82	-65.15	-65.6219	-58.2875	-65.2719	-66.6469	-66.0813	-66.7125	-66.0312	-59.7781	-67.5	-67.3281	-67.8187	-63.2469	-62.7625	-67.9906	-63.9094
		0.16	4.84	-65.1469	-65.6	-58.2906	-65.2875	-66.6	-66.1969	-66.7781	-66.0656	-59.8187	-67.5062	-67.3844	-67.8375	-63.2469	-62.7062	-68.075	-63.9844
		0.16	4.86	-65.2219	-65.6562	-58.2906	-65.2969	-66.6594	-66.1875	-66.8031	-66.0875	-59.9344	-67.5938	-67.4313	-67.9469	-63.2188	-62.7562	-68.0563	-64
		0.16	4.88	-65.3344	-65.7812	-58.3	-65.375	-66.775	-66.15	-66.7719	-66.0875	-59.8969	-67.5969	-67.3969	-67.9469	-63.2469	-62.7812	-68.0563	-63.9938
		0.16	4.9	-65.325	-65.7531	-58.2875	-65.3375	-66.7688	-66.275	-66.8469	-66.175	-59.8781	-67.6	-67.45	-67.8938	-63.2625	-62.7812	-68.125	-63.9875
		0.16	4.92	-65.3	-65.7875	-58.2687	-65.3125	-66.7188	-66.2438	-66.8438	-66.2125	-59.9906	-67.6719	-67.4625	-67.9563	-63.2156	-62.8406	-68.1344	-64.0375
		0.16	4.94	-65.3125	-65.8281	-58.2781	-65.4219	-66.7656	-66.2063	-66.7969	-66.2094	-59.9313	-67.6813	-67.4094	-68.0219	-63.2594	-62.8625	-68.1281	-64
		0.16	4.96	-65.3656	-65.775	-58.3375	-65.4437	-66.8	-66.325	-66.8656	-66.2812	-59.8812	-67.7	-67.4156	-68.0406	-63.325	-62.8875	-68.1562	-64
		0.16	4.98	-65.375	-65.75	-58.3375	-65.4219	-66.8375	-66.325	-66.8156	-66.375	-59.9844	-67.7937	-67.5	-67.9938	-63.3281	-62.9437	-68.1906	-64.075
		0.26	0	-60.8	-60.7	-61.1719	-60.9813	-62.6063	-61.7906	-62.2313	-61.7844	-63.3812	-63.7094	-63.3875	-63.4562	-65.2031	-65.5938	-66.325	-65.75
		0.26	0.02	-60.7969	-60.6031	-61.1719	-60.9938	-62.5812	-61.8344	-62.175	-61.85	-63.4875	-63.6906	-63.325	-63.5219	-65.1937	-65.6656	-66.3875	-65.7969
		0.26	0.04	-60.8312	-60.5812	-61.2	-61.0031	-62.5469	-61.8281	-62.1844	-61.8094	-63.4281	-63.7	-63.3063	-63.575	-65.2156	-65.7063	-66.425	-65.8156
		0.26	0.06	-60.8156	-60.6156	-61.1375	-61.0156	-62.6188	-61.8438	-62.25	-61.7562	-63.4	-63.7188	-63.3781	-63.5094	-65.275	-65.6375	-66.4125	-65.825
		0.26	0.08	-60.8438	-60.55	-61.1781	-61.0375	-62.6312	-61.8563	-62.2	-61.8375	-63.4469	-63.6656	-63.3625	-63.4844	-65.2562	-65.6375	-66.4281	-65.8406
		0.26	0.1	-60.8875	-60.5062	-61.2	-61.0625	-62.5781	-61.8031	-62.1625	-61.85	-63.4344	-63.7438	-63.3531	-63.5281	-65.2625	-65.6937	-66.4375	-65.8438
		0.26	0.12	-60.8406	-60.5031	-61.1813	-60.9688	-62.6406	-61.7938	-62.2438	-61.825	-63.4562	-63.7906	-63.3969	-63.4813	-65.3063	-65.7031	-66.4	-65.85
		0.26	0.14	-60.8125	-60.5812	-61.25	-60.9844	-62.5687	-61.8594	-62.2281	-61.8688	-63.4625	-63.6937	-63.3469	-63.4813	-65.25	-65.6844	-66.35	-65.9375
		0.26	0.16	-60.8875	-60.5375	-61.1719	-60.9844	-62.5312	-61.7938	-62.1688	-61.8187	-63.4656	-63.7	-63.325	-63.5563	-65.2625	-65.7562	-66.4	-65.875
		0.26	0.18	-60.875	-60.5281	-61.1281	-60.9719	-62.5969	-61.7812	-62.15	-61.825	-63.4094	-63.7313	-63.3281	-63.4625	-65.3219	-65.7469	-66.4	-65.8375
		0.26	0.2	-60.8281	-60.5	-61.1781	-60.9656	-62.5469	-61.8563	-62.1937	-61.8906	-63.4719	-63.6906	-63.3438	-63.4625	-65.2531	-65.6625	-66.3688	-65.9031
		0.26	0.22	-60.8906	-60.5	-61.1969	-60.9625	-62.5469	-61.7969	-62.1969	-61.8719	-63.4688	-63.6375	-63.2656	-63.5094	-65.2469	-65.6813	-66.3844	-65.8906
		0.26	0.24	-60.8469	-60.4781	-61.1562	-60.925	-62.5781	-61.7812	-62.1562	-61.8063	-63.4344	-63.7062	-63.2969	-63.5219	-65.3187	-65.7031	-66.4	-65.8594
		0.26	0.26	-60.8094	-60.45	-61.1594	-60.9938	-62.5312	-61.8531	-62.2031	-61.8625	-63.4719	-63.725	-63.2969	-63.475	-65.3156	-65.5969	-66.3625	-65.9
		0.26	0.28	-60.8625	-60.5563	-61.1813	-60.9531	-62.5594	-61.8563	-62.2	-61.8281	-63.4219	-63.7219	-63.2656	-63.5031	-65.3187	-65.6375	-66.3125	-65.8313
		0.26	0.3	-60.7594	-60.5312	-61.1844	-60.9406	-62.5625	-61.9094	-62.1625	-61.8312	-63.3937	-63.7031	-63.1844	-63.55	-65.3906	-65.6719	-66.3656	-65.8375
		0.26	0.32	-60.4531	-60.1437	-60.8219	-60.6188	-62.1594	-61.4906	-61.8563	-61.4969	-63.0781	-63.425	-62.8094	-63.1031	-65.0375	-65.3313	-66.0687	-65.5406
		0.26	0.34	-62.9375	-62.5687	-63.2125	-63.0094	-64.55	-63.7562	-64.2812	-63.8688	-65.6375	-65.9125	-65.3469	-65.6438	-67.25	-67.5781	-68.3313	-67.825
		0.26	0.36	-66.9812	-66.6875	-67.2688	-67.1094	-68.575	-67.875	-68.2281	-67.875	-69.8	-70.2	-69.6	-70.0375	-71.2094	-71.5687	-72.3125	-71.7625
		0.26	0.38	-68.025	-67.7688	-68.3688	-68.2375	-69.6813	-68.875	-69.2719	-69.0094	-71.1937	-71.425	-70.8156	-71.1844	-72.4	-72.7031	-73.5094	-72.95
		0.26	0.4	-67.5125	-67.2375	-67.8063	-67.6813	-69.1969	-68.4375	-68.8	-68.4625	-70.5125	-70.7969	-70.2188	-70.5625	-71.9281	-72.275	-73.0406	-72.4781
		0.26	0.42	-66.4563	-66.2375	-66.7406	-66.6031	-68.2063	-67.3688	-67.7844	-67.3969	-69.2562	-69.5625	-68.9469	-69.4031	-70.9875	-71.2375	-72.075	-71.4812
		0.26	0.44	-65.3781	-65.2094	-65.7438	-65.5781	-67.1312	-66.275	-66.6906	-66.4187	-68.1	-68.3781	-67.7	-68.1219	-69.9	-70.1906	-71.0344	-70.3875
		0.26	0.46	-64.5	-64.25	-64.8125	-64.5781	-66.2937	-65.4688	-65.85	-65.5	-67.0281	-67.3656	-66.7	-67.0344	-68.9313	-69.1969	-70.0406	-69.4313
		0.26	0.48	-63.725	-63.45	-64.0156	-63.8656	-65.5	-64.6375	-65.1	-64.6844	-66.175	-66.5594	-65.8219	-66.2688	-68.2094	-68.4406	-69.25	-68.75
		0.26	0.5	-63.15	-62.8812	-63.5219	-63.3281	-64.8844	-64.05	-64.4531	-64.1562	-65.55	-65.9125	-65.1562	-65.6937	-67.6219	-67.9156	-68.6937	-68.125
		0.26	0.52	-62.7719	-62.5125	-63.0906	-62.8063	-64.4969	-63.6656	-64	-63.725	-65.1	-65.5531	-64.7719	-65.1969	-67.1125	-67.5	-68.2188	-67.6844
		0.26	0.54	-62.3563	-62.1	-62.7375	-62.5687	-64.1031	-63.35	-63.7562	-63.3844	-64.825	-65.2344	-64.4187	-64.8688	-66.8625	-67.125	-67.8719	-67.4
		0.26	0.56	-62.1625	-61.8375	-62.5125	-62.2719	-63.8688	-63.05	-63.4094	-63.1219	-64.4844	-64.8938	-64.1219	-64.6562	-66.6281	-66.9375	-67.6125	-67.0969
		0.26	0.58	-61.9875	-61.6594	-62.3031	-62.0625	-63.7125	-62.9	-63.2	-62.8844	-64.3031	-64.75	-63.925	-64.3594	-66.3844	-66.7344	-67.4688	-66.8594
		0.26	0.6	-61.7625	-61.4938	-62.1406	-61.8969	-63.4813	-62.7844	-63.1219	-62.675	-64.2	-64.6687	-63.75	-64.2375	-66.2469	-66.5375	-67.2438	-66.7562
		0.26	0.62	-61.65	-61.3031	-62.0563	-61.7656	-63.3594	-62.6	-62.9594	-62.5687	-64.0437	-64.4719	-63.5625	-64.1344	-66.1625	-66.4531	-67.0844	-66.6312
		0.26	0.64	-61.5875	-61.275	-61.9188	-61.5938	-63.2594	-62.5375	-62.8219	-62.5375	-63.9625	-64.4094	-63.475	-63.9969	-65.9875	-66.4	-67.0188	-66.5344
		0.26	0.66	-61.4688	-61.2125	-61.825	-61.5687	-63.1156	-62.4281	-62.775	-62.3781	-63.8906	-64.3906	-63.4969	-63.9031	-65.9375	-66.2438	-66.9875	-66.5375
		0.26	0.68	-61.4094	-61.1594	-61.7188	-61.4219	-63.1156	-62.2812	-62.7313	-62.3688	-63.8187	-64.2781	-63.4219	-63.9406	-65.9156	-66.1125	-66.8625	-66.4187
		0.26	0.7	-61.4281	-61.05	-61.6688	-61.3594	-63.0531	-62.2687	-62.5875	-62.3406	-63.75	-64.1875	-63.35	-63.8312	-65.7969	-66.1406	-66.8375	-66.2906
		0.26	0.72	-61.3	-61.0563	-61.6	-61.3844	-62.9437	-62.2125	-62.5563	-62.2469	-63.7719	-64.2406	-63.3781	-63.8	-65.775	-66.0969	-66.8187	-66.3187
		0.26	0.74	-61.2188	-61.0906	-61.5406	-61.325	-62.95	-62.1	-62.5719	-62.2344	-63.6844	-64.1656	-63.2812	-63.8	-65.7875	-65.9688	-66.725	-66.2469
		0.26	0.76	-61.25	-60.9844	-61.5687	-61.2719	-62.9062	-62.05	-62.5281	-62.2281	-63.65	-64.0656	-63.2188	-63.7969	-65.7188	-65.9563	-66.6719	-66.2063
		0.26	0.78	-61.1781	-60.9188	-61.4531	-61.3125	-62.7687	-62.0531	-62.4156	-62.1125	-63.675	-64	-63.2438	-63.7406	-65.7	-66.0062	-66.6844	-66.1937
		0.26	0.8	-61.2031	-60.875	-61.4125	-61.2844	-62.7594	-62	-62.4969	-62.1094	-63.6437	-64.1	-63.1813	-63.6875	-65.7	-65.975	-66.6625	-66.1469
		0.26	0.82	-61.1469	-60.8844	-61.4469	-61.2188	-62.7844	-61.9375	-62.4719	-62.1437	-63.6094	-64.075	-63.0594	-63.7375	-65.5906	-65.9062	-66.5719	-66.1375
		0.26	0.84	-61.0687	-60.8469	-61.3469	-61.2375	-62.7438	-62.0125	-62.4156	-62.0594	-63.6063	-64.025	-63.0844	-63.6781	-65.575	-65.9219	-66.575	-66.1094
		0.26	0.86	-61.025	-60.7844	-61.3719	-61.1844	-62.7562	-61.9437	-62.3812	-62.0031	-63.5656	-64.0188	-63.1031	-63.675	-65.5906	-65.8906	-66.5687	-66.0437
		0.26	0.88	-61.0344	-60.8281	-61.4125	-61.1344	-62.7	-61.9	-62.4156	-62.1281	-63.4906	-64.0594	-63.1094	-63.6781	-65.5406	-65.85	-66.5156	-66.0375
		0.26	0.9	-60.95	-60.8219	-61.325	-61.1688	-62.6969	-61.9375	-62.3656	-62.1031	-63.5625	-63.9969	-63.05	-63.6156	-65.5563	-65.8344	-66.5156	-66.1281
		0.26	0.92	-61.025	-60.8281	-61.3656	-61.0906	-62.7344	-61.9344	-62.3312	-62.05	-63.55	-63.9688	-63.0469	-63.5	-65.6062	-65.8781	-66.5813	-66.075
		0.26	0.94	-61.0469	-60.7719	-61.4188	-61.0938	-62.6969	-61.9	-62.3312	-62.05	-63.5156	-64.0125	-63.0187	-63.5844	-65.5875	-65.825	-66.5156	-66.075
		0.26	0.96	-60.9781	-60.7687	-61.35	-61.0938	-62.6656	-61.9188	-62.4	-62.0469	-63.5438	-64	-62.975	-63.6	-65.5062	-65.8	-66.4844	-66.1094
		0.26	0.98	-60.9469	-60.7719	-61.3594	-61.0906	-62.675	-61.9375	-62.3906	-62	-63.5594	-63.9156	-62.9344	-63.5187	-65.5437	-65.8531	-66.4719	-66.0437
		0.26	1	-61	-60.7594	-61.3812	-61.1	-62.6531	-61.85	-62.3125	-61.9969	-63.5062	-63.8781	-62.9938	-63.5312	-65.55	-65.8469	-66.4812	-66.0656
		0.26	1.02	-61.0156	-60.875	-61.3844	-61.2125	-62.75	-61.9062	-62.3875	-62.025	-63.4969	-63.9531	-62.95	-63.6063	-65.4625	-65.8125	-66.4625	-66.1594
		0.26	1.04	-61.1375	-61.0938	-61.475	-61.2844	-62.8781	-62.1094	-62.5281	-62.1375	-63.475	-63.95	-62.9437	-63.5594	-65.5094	-65.8281	-66.45	-66.0875
		0.26	1.06	-61.325	-61.1719	-61.6688	-61.5156	-63.0156	-62.2375	-62.7125	-62.4188	-63.4125	-63.8906	-62.95	-63.5438	-65.5281	-65.8656	-66.5125	-66.1156
		0.26	1.08	-61.4969	-61.2844	-61.8875	-61.7719	-63.2156	-62.4531	-62.8812	-62.6219	-63.4625	-63.9469	-62.9625	-63.5469	-65.4875	-65.8906	-66.5469	-66.2156
		0.26	1.1	-61.7375	-61.5531	-62.1281	-61.9625	-63.5187	-62.75	-63.125	-62.7938	-63.55	-64	-62.9375	-63.5469	-65.5344	-65.975	-66.575	-66.2469
		0.26	1.12	-62.0812	-61.7938	-62.4562	-62.2781	-63.7531	-63.0094	-63.35	-63.0906	-63.6375	-64.0719	-63.05	-63.6406	-65.6719	-66.1375	-66.7469	-66.3438
		0.26	1.14	-62.3469	-62.05	-62.7281	-62.5406	-63.9906	-63.2938	-63.5719	-63.425	-63.75	-64.2063	-63.1625	-63.8063	-65.7281	-66.325	-66.9313	-66.4906
		0.26	1.16	-62.6437	-62.3187	-62.9562	-62.8094	-64.2781	-63.6594	-63.8781	-63.725	-63.9594	-64.4406	-63.15	-63.9375	-65.85	-66.4969	-67.0094	-66.4812
		0.26	1.18	-63.0062	-62.625	-63.3781	-63.15	-64.4062	-63.9594	-64.125	-64.0656	-64.075	-64.5656	-63.1906	-64.0344	-65.9437	-66.6906	-67.1562	-66.575
		0.26	1.2	-63.275	-62.8063	-63.675	-63.4719	-64.575	-64.1844	-64.3875	-64.4281	-64.1813	-64.7031	-63.2313	-64.175	-66.0813	-67.0125	-67.3625	-66.7281
		0.26	1.22	-63.575	-63.05	-63.9219	-63.7062	-64.8	-64.5125	-64.65	-64.675	-64.3125	-64.9187	-63.175	-64.3781	-66.1188	-67.2219	-67.5563	-66.7406
		0.26	1.24	-63.9375	-63.3438	-64.2812	-63.9813	-64.9313	-64.7125	-64.8844	-65.0031	-64.4094	-65.1156	-63.0875	-64.45	-66.2219	-67.4938	-67.725	-66.7812
		0.26	1.26	-64.2188	-63.4781	-64.5625	-64.1969	-65.0188	-64.8969	-65.025	-65.3031	-64.4406	-65.25	-63.1344	-64.5344	-66.3625	-67.7625	-67.9125	-66.7875
		0.26	1.28	-64.2844	-63.6406	-64.7031	-64.3187	-65.1312	-65.0344	-65.2375	-65.4844	-64.5	-65.3656	-63.0344	-64.6562	-66.4094	-67.9625	-68.1188	-66.7188
		0.26	1.3	-64.475	-63.7906	-64.9437	-64.4625	-65.175	-65.1687	-65.4812	-65.5875	-64.4969	-65.475	-62.9	-64.7	-66.5344	-68.1	-68.225	-66.625
		0.26	1.32	-64.5188	-63.8281	-65.1469	-64.5188	-65.1531	-65.1625	-65.5531	-65.7063	-64.3469	-65.3594	-62.7469	-64.65	-66.6	-68.2063	-68.2156	-66.5312
		0.26	1.34	-64.4156	-63.7375	-65.2281	-64.4969	-65.0906	-65.0062	-65.5125	-65.65	-64.1781	-65.075	-62.6	-64.5188	-66.4875	-68.2312	-68.2094	-66.2625
		0.26	1.36	-64.2594	-63.6312	-65.2438	-64.3688	-64.8531	-64.8844	-65.425	-65.5312	-63.9281	-64.6844	-62.3	-64.2812	-66.4	-68.0969	-67.9906	-65.9563
		0.26	1.38	-63.9469	-63.375	-65.175	-64.2094	-64.5719	-64.5469	-65.1344	-65.3594	-63.5219	-64.1937	-61.8688	-63.7656	-66.2094	-67.875	-67.6062	-65.5938
		0.26	1.4	-63.3375	-62.9062	-64.9344	-63.8187	-64.0719	-64.05	-64.7	-64.9156	-62.9313	-63.4062	-61.3625	-63.0875	-65.8	-67.55	-67.15	-65.1219
		0.26	1.42	-62.7438	-62.3625	-64.6531	-63.425	-63.3563	-63.5062	-64.1156	-64.2844	-62.2562	-62.6469	-60.6594	-62.375	-65.3469	-67.0813	-66.5469	-64.5312
		0.26	1.44	-61.975	-61.7438	-64.2063	-62.8844	-62.475	-62.8969	-63.5	-63.6281	-61.4094	-61.7156	-59.775	-61.3906	-64.7781	-66.45	-65.8344	-63.9906
		0.26	1.46	-60.9375	-60.9313	-63.5656	-62.1813	-61.525	-62.1375	-62.7125	-62.625	-60.4219	-60.7344	-58.9562	-60.25	-64.1031	-65.6687	-65.0656	-63.25
		0.26	1.48	-59.9688	-60.1	-62.8438	-61.425	-60.3063	-61.2969	-61.8438	-61.7313	-59.4031	-59.6125	-58.1156	-59.175	-63.375	-64.8719	-64.2125	-62.4188
		0.26	1.5	-58.9469	-59.2406	-62.1375	-60.6625	-58.9906	-60.5125	-61.0187	-60.8781	-58.3625	-58.5687	-57.1125	-58.0406	-62.6813	-63.8906	-63.2438	-61.5438
		0.26	1.52	-57.8125	-58.3031	-61.35	-59.7094	-57.7219	-59.55	-60.25	-59.7719	-57.3031	-57.5656	-56.0906	-56.85	-61.8281	-62.8688	-62.3094	-60.5625
		0.26	1.54	-56.7438	-57.225	-60.5375	-58.8563	-56.2844	-58.5906	-59.4375	-58.725	-56.1781	-56.5875	-55.1	-55.75	-61	-61.9875	-61.4719	-59.5969
		0.26	1.56	-55.7438	-56.3	-59.8219	-58.0156	-54.8375	-57.75	-58.5906	-57.7531	-55.1875	-55.6281	-54.1625	-54.8125	-60.2625	-61.0719	-60.6469	-58.7406
		0.26	1.58	-54.6156	-55.325	-59.0406	-57.0719	-53.5187	-56.95	-57.85	-56.9344	-54.2031	-54.8187	-53.1031	-53.8906	-59.5125	-60.1	-59.7812	-57.9219
		0.26	1.6	-53.5094	-54.3438	-58.2438	-56.3312	-52.2375	-56.1656	-57.1156	-56.0781	-53.2562	-54.0812	-52.1625	-53.0438	-58.7906	-59.2	-59.05	-57.1094
		0.26	1.62	-52.6	-53.4531	-57.5375	-55.5969	-51.0125	-55.4469	-56.3656	-55.2313	-52.4844	-53.3438	-51.3156	-52.3688	-58.2219	-58.3906	-58.5094	-56.5
		0.26	1.64	-51.7188	-52.6719	-56.8625	-54.8344	-49.9188	-54.9156	-55.6719	-54.5438	-51.8	-52.7562	-50.4719	-51.7875	-57.7562	-57.675	-57.9688	-55.9094
		0.26	1.66	-50.85	-51.85	-56.2687	-54.2844	-48.55	-54.35	-55.05	-53.825	-51.0938	-52.25	-49.6781	-51.2906	-57.2	-57.0656	-57.5281	-55.3781
		0.26	1.68	-50.25	-51.2	-55.7906	-53.8	-46.5469	-53.8187	-54.4281	-53.1906	-50.6312	-51.7719	-48.9719	-50.8563	-56.7438	-56.5563	-57.2281	-55.0344
		0.26	1.7	-49.5812	-50.55	-55.3375	-53.2469	-43.4875	-53.4188	-53.85	-52.7	-50.2156	-51.3531	-48.3187	-50.6375	-56.2938	-56.2219	-56.9625	-54.6688
		0.26	1.72	-48.8312	-49.9031	-54.8844	-52.8344	-39.1219	-53.0969	-53.4469	-52.2	-49.8187	-51.0031	-47.5094	-50.3625	-56.0563	-55.85	-56.6156	-54.3031
		0.26	1.74	-48.0187	-49.4	-54.6094	-52.45	-33.0219	-52.7625	-53.0469	-51.675	-49.4281	-50.7125	-46.3156	-50.1125	-55.7344	-55.5031	-56.3906	-54.1063
		0.26	1.76	-46.5156	-48.8625	-54.4969	-52.0438	-24.925	-52.5187	-52.6437	-51.3469	-49.1594	-50.4688	-44.2	-49.975	-55.5156	-55.3438	-56.2969	-53.9188
		0.26	1.78	-43.8781	-48.2438	-54.1094	-51.7625	-15.4812	-52.2875	-52.3406	-51.0375	-48.9562	-50.1969	-40.8438	-49.9031	-55.3375	-55.1469	-56.1813	-53.725
		0.26	1.8	-40.1625	-47.3875	-53.9062	-51.5375	-6.0875	-52.075	-52.1125	-50.6094	-48.5781	-50.0312	-35.9188	-49.7625	-55.0656	-54.9469	-56.0219	-53.6063
		0.26	1.82	-35.2906	-45.7719	-53.875	-51.2469	1.69375	-51.9344	-51.9094	-50.3375	-48.2281	-49.9281	-29.2281	-49.6719	-55.0062	-54.8875	-55.9437	-53.5
		0.26	1.84	-28.3094	-43.0438	-53.5812	-51.0719	7.00313	-51.8312	-51.7469	-50.1375	-47.7375	-49.7344	-20.3062	-49.7156	-54.9562	-54.8594	-55.9125	-53.3031
		0.26	1.86	-19.5438	-39.25	-53.5656	-50.9437	9.37187	-51.6875	-51.7188	-49.7906	-46.5625	-49.6125	-9.97188	-49.6594	-54.7625	-54.7344	-55.8031	-53.25
		0.26	1.88	-10.3406	-34.0781	-53.5125	-50.7344	8.69063	-51.475	-51.6688	-49.5719	-44.2125	-49.525	-0.175	-49.5656	-54.8094	-54.6437	-55.7094	-53.2281
		0.26	1.9	-1.6625	-26.9406	-53.3906	-50.6781	5.60625	-51.4562	-51.5812	-49.3719	-40.6781	-49.4156	7.50313	-49.55	-54.7969	-54.65	-55.7469	-53.1437
		0.26	1.92	5.05	-18.1625	-53.4281	-50.6594	0.825	-51.3781	-51.4813	-48.9719	-35.7156	-49.2375	12.1969	-49.6688	-54.775	-54.6594	-55.7812	-53.15
		0.26	1.94	8.97188	-8.80313	-53.4	-50.4781	-5.32188	-51.2	-51.5563	-48.2687	-28.8906	-49.1	13.4219	-49.6688	-54.7531	-54.6375	-55.7313	-53.175
		0.26	1.96	10.0562	-0.403125	-53.375	-50.4625	-12.2	-51.1125	-51.5281	-46.7844	-19.8469	-48.9906	11.4094	-49.7125	-54.7938	-54.6594	-55.7375	-53.1688
		0.26	1.98	8.33125	5.925	-53.3969	-50.4281	-19.2	-51.0875	-51.55	-44.1469	-9.66875	-48.7375	6.87813	-49.7969	-54.725	-54.7156	-55.8531	-53.2531
		0.26	2	4.45625	9.55313	-53.4938	-50.2969	-25.9125	-50.9656	-51.5906	-40.25	0.034375	-48.1188	0.659375	-49.85	-54.7406	-54.7719	-55.8469	-53.3156
		0.26	2.02	-1.05625	10.2469	-53.45	-50.2469	-32.0438	-50.9	-51.7406	-35.1094	7.71875	-46.6469	-6.73125	-49.9156	-54.775	-54.7781	-55.8969	-53.3594
		0.26	2.04	-7.41875	8.19687	-53.3812	-50.2188	-37.4	-50.8844	-51.7656	-28.0906	12.25	-44.0094	-14.6375	-50.0219	-54.7594	-54.8406	-55.9406	-53.4281
		0.26	2.06	-14.3687	4.025	-53.4781	-50.1406	-42.0844	-50.7625	-51.7875	-19.1969	13.25	-40.0719	-22.3031	-50.2	-54.7469	-54.9719	-56.0781	-53.5406
		0.26	2.08	-21.2906	-1.54062	-53.4906	-50.1562	-46.0625	-50.6813	-51.8844	-9.75	11.0469	-34.8281	-29.4062	-50.2188	-54.7781	-55.0375	-56.0844	-53.5969
		0.26	2.1	-27.6969	-8.10938	-53.5344	-50.2	-49.2375	-50.6844	-52.0062	-1.24688	6.34062	-27.8469	-35.7438	-50.3094	-54.7656	-55.0938	-56.1688	-53.5938
		0.26	2.12	-33.5906	-14.9688	-53.6562	-50.1719	-51.8688	-50.7094	-52.0594	5.28125	-0.20625	-18.625	-41.1562	-50.4	-54.7	-55.2	-56.3531	-53.6594
		0.26	2.14	-38.75	-21.8031	-53.7188	-50.2219	-54.1219	-50.6344	-52.1469	9.06875	-7.725	-8.40312	-45.6469	-50.5625	-54.7375	-55.25	-56.45	-53.6844
		0.26	2.16	-43.05	-28.2469	-53.7156	-50.3125	-55.8312	-50.6562	-52.275	9.74375	-15.5625	0.925	-49.3937	-50.6719	-54.7781	-55.3469	-56.4625	-53.7469
		0.26	2.18	-46.6594	-33.9719	-53.8125	-50.2812	-57.2438	-50.7344	-52.3406	7.74062	-23.2531	8.01562	-52.4344	-50.8625	-54.7219	-55.45	-56.5594	-53.8531
		0.26	2.2	-49.7281	-38.975	-53.9313	-50.35	-58.4344	-50.75	-52.375	3.725	-30.3281	12.2	-54.8469	-51.075	-54.6937	-55.5906	-56.7031	-53.9094
		0.26	2.22	-52.1937	-43.2906	-53.9437	-50.5156	-59.2875	-50.7812	-52.5344	-1.9	-36.45	12.9094	-56.7188	-51.1625	-54.7719	-55.6969	-56.825	-53.9156
		0.26	2.24	-54.1437	-46.8156	-53.9719	-50.5	-59.9437	-50.9406	-52.65	-8.44063	-41.7687	10.55	-58.2562	-51.2969	-54.7781	-55.7531	-56.8656	-54.0594
		0.26	2.26	-55.85	-49.7969	-54.0625	-50.5406	-60.5469	-50.9656	-52.7031	-15.3875	-46.1719	5.7625	-59.4719	-51.4688	-54.7781	-55.9375	-57.0687	-54.1719
		0.26	2.28	-57.1656	-52.2844	-54.0406	-50.7	-60.9437	-50.9813	-52.8219	-22.2969	-49.8156	-0.603125	-60.4344	-51.6156	-54.8906	-56.0687	-57.2219	-54.1844
		0.26	2.3	-58.1594	-54.225	-54.0938	-50.7719	-61.1531	-51.1906	-52.9344	-28.7313	-52.7	-8.03438	-61.1063	-51.75	-55.0125	-56.1688	-57.3063	-54.2844
		0.26	2.32	-58.9969	-55.7969	-54.2562	-50.85	-61.4688	-51.2844	-53.0344	-34.425	-55.025	-15.875	-61.6531	-51.9562	-55.075	-56.2469	-57.4094	-54.4
		0.26	2.34	-59.6844	-57.0844	-54.3187	-51.0156	-61.6219	-51.2906	-53.0687	-39.3688	-56.8906	-23.4438	-62.0875	-52.175	-55.1719	-56.375	-57.55	-54.4844
		0.26	2.36	-60.15	-58.0969	-54.4031	-51.1031	-61.7031	-51.3875	-53.2062	-43.65	-58.3344	-30.35	-62.375	-52.2562	-55.3312	-56.5	-57.6781	-54.6719
		0.26	2.38	-60.5438	-58.925	-54.4875	-51.1875	-61.8125	-51.5969	-53.3094	-47.2562	-59.5094	-36.4406	-62.5938	-52.3656	-55.3937	-56.5969	-57.7594	-54.775
		0.26	2.4	-60.85	-59.55	-54.5594	-51.3594	-61.8781	-51.6344	-53.4094	-50.1344	-60.4188	-41.7562	-62.8688	-52.6406	-55.5062	-56.6688	-57.9188	-54.8438
		0.26	2.42	-61.0125	-60.0531	-54.5531	-51.4281	-61.8375	-51.725	-53.4531	-52.5563	-61.075	-46.0938	-62.9188	-52.75	-55.6688	-56.8563	-58.0844	-54.9781
		0.26	2.44	-61.15	-60.4281	-54.6781	-51.4906	-61.8625	-51.8812	-53.6469	-54.5312	-61.55	-49.6875	-63.0094	-52.8625	-55.75	-56.9656	-58.1594	-55.1937
		0.26	2.46	-61.3469	-60.6781	-54.8	-51.6063	-61.875	-52.0344	-53.8156	-56.0531	-61.9688	-52.6344	-63.1437	-52.9969	-55.8469	-57.05	-58.2469	-55.3063
		0.26	2.48	-61.3844	-60.9156	-54.85	-51.7	-61.7812	-52.0531	-53.8812	-57.3094	-62.2719	-54.9562	-63.1937	-53.2219	-55.9875	-57.2125	-58.4156	-55.5
		0.26	2.5	-61.4156	-61.125	-54.9625	-51.7656	-61.8375	-52.2156	-54.0031	-58.4062	-62.4469	-56.7844	-63.1312	-53.3438	-56.0906	-57.3781	-58.5781	-55.6781
		0.26	2.52	-61.4719	-61.1937	-55.0719	-51.9344	-61.8625	-52.375	-54.1406	-59.1813	-62.6188	-58.3	-63.1344	-53.4406	-56.1594	-57.4781	-58.6719	-55.7844
		0.26	2.54	-61.45	-61.3094	-55.0844	-52.0438	-61.8469	-52.4437	-54.2062	-59.8125	-62.7875	-59.475	-63.1469	-53.6719	-56.3563	-57.5875	-58.7594	-55.9219
		0.26	2.56	-61.4219	-61.3594	-55.175	-52.1	-61.7656	-52.5563	-54.2687	-60.3594	-62.825	-60.3	-63.1969	-53.7938	-56.4875	-57.8094	-58.9156	-56.1156
		0.26	2.58	-61.3969	-61.375	-55.3	-52.275	-61.8563	-52.7125	-54.4125	-60.7375	-62.85	-60.9719	-63.0781	-53.9094	-56.5594	-57.8906	-59.0219	-56.2406
		0.26	2.6	-61.425	-61.4	-55.3688	-52.4062	-61.8187	-52.8063	-54.5094	-60.9656	-62.9094	-61.5625	-63.075	-54.0875	-56.7281	-57.9594	-59.0687	-56.3469
		0.26	2.62	-61.4	-61.4344	-55.3875	-52.425	-61.8	-52.9125	-54.55	-61.2438	-62.9	-61.9125	-63.15	-54.2031	-56.9344	-58.05	-59.1969	-56.4406
		0.26	2.64	-61.375	-61.35	-55.4969	-52.5656	-61.8656	-53.0594	-54.6813	-61.4094	-62.85	-62.175	-63.0875	-54.275	-57.0219	-58.2344	-59.3594	-56.7062
		0.26	2.66	-61.4188	-61.3688	-55.6219	-52.75	-61.8531	-53.1906	-54.775	-61.4938	-62.8563	-62.4125	-63.0656	-54.4031	-57.1406	-58.3344	-59.4469	-56.7938
		0.26	2.68	-61.4062	-61.3312	-55.6312	-52.7844	-61.7938	-53.2406	-54.85	-61.5594	-62.9062	-62.6375	-63.0875	-54.6375	-57.2875	-58.45	-59.5844	-56.925
		0.26	2.7	-61.3438	-61.3187	-55.7062	-52.9156	-61.8531	-53.3844	-54.9313	-61.6531	-62.8	-62.6813	-63.1188	-54.75	-57.4094	-58.5438	-59.6813	-57.1188
		0.26	2.72	-61.375	-61.375	-55.8656	-53.2438	-61.8688	-53.5375	-55.025	-61.675	-62.7938	-62.725	-63.1	-54.8281	-57.4594	-58.6719	-59.7781	-57.2062
		0.26	2.74	-61.35	-61.3281	-55.8375	-53.1813	-61.8438	-53.5469	-55.1188	-61.6656	-62.9094	-62.8688	-63.1063	-54.9781	-57.6437	-58.7625	-59.8219	-57.4156
		0.26	2.76	-61.2812	-61.2656	-55.9094	-53.2031	-61.8875	-53.6312	-55.1906	-61.7281	-62.875	-62.8594	-63.1719	-55.1531	-57.7687	-58.8094	-59.9094	-57.5594
		0.26	2.78	-61.3688	-61.2875	-56.0563	-53.4188	-61.9625	-53.8063	-55.2656	-61.7656	-62.9	-62.8688	-63.1719	-55.2594	-57.7906	-58.9562	-60.0156	-57.6031
		0.26	2.8	-61.4094	-61.2906	-56.125	-53.4344	-61.8031	-53.9469	-55.3937	-61.6625	-62.8719	-62.9313	-63.1719	-55.3125	-57.8875	-59.0563	-60.1594	-57.7875
		0.26	2.82	-61.3594	-61.2625	-56.1125	-53.5531	-61.9562	-53.9719	-55.4844	-61.6906	-62.9281	-62.8594	-63.2438	-55.4344	-58.0125	-59.1437	-60.2062	-57.9406
		0.26	2.84	-61.3812	-61.3219	-56.2313	-53.6375	-62.0969	-54.15	-55.5375	-61.7844	-62.9219	-62.8531	-63.2875	-55.575	-58.025	-59.2219	-60.2687	-58.0156
		0.26	2.86	-61.425	-61.3094	-56.3063	-53.7594	-61.975	-54.2625	-55.5969	-61.7625	-62.9094	-62.8875	-63.2875	-55.6437	-58.075	-59.3625	-60.3906	-58.1063
		0.26	2.88	-61.4125	-61.3469	-56.35	-53.85	-62.05	-54.3063	-55.7062	-61.6937	-63	-62.8844	-63.325	-55.7406	-58.1875	-59.4781	-60.5156	-58.2906
		0.26	2.9	-61.3937	-61.375	-56.4406	-53.9156	-62.0844	-54.4031	-55.8406	-61.8156	-62.9969	-62.8688	-63.4625	-55.8875	-58.2281	-59.5	-60.5969	-58.35
		0.26	2.92	-61.4375	-61.3469	-56.5844	-54.0844	-62.1	-54.5406	-55.85	-61.7969	-62.9719	-62.9125	-63.4219	-56.0031	-58.2313	-59.5469	-60.6344	-58.4156
		0.26	2.94	-61.3563	-61.3625	-56.5781	-54.1125	-62.1656	-54.5781	-55.875	-61.7656	-63.0438	-62.9094	-63.4562	-56.0156	-58.325	-59.6937	-60.7687	-58.6
		0.26	2.96	-61.375	-61.5	-56.6437	-54.1688	-62.2531	-54.5875	-56.025	-61.775	-63.1125	-62.8375	-63.55	-56.1156	-58.425	-59.7594	-60.8594	-58.6844
		0.26	2.98	-61.4469	-61.4969	-56.7375	-54.3187	-62.3031	-54.7031	-56.1188	-61.8375	-63.0625	-62.9	-63.6281	-56.2938	-58.5031	-59.7875	-60.8875	-58.75
		0.26	3	-61.4719	-61.5	-56.7812	-54.35	-62.3	-54.8125	-56.2031	-61.825	-63.0438	-62.9219	-63.5875	-56.3406	-58.5687	-59.8563	-60.9875	-58.9094
		0.26	3.02	-61.4906	-61.5656	-56.7844	-54.4531	-62.4094	-54.8406	-56.2469	-61.8031	-63.1375	-62.8781	-63.6437	-56.3563	-58.7219	-59.9875	-61.1219	-59
		0.26	3.04	-61.55	-61.55	-56.8219	-54.5563	-62.4938	-54.9938	-56.3531	-61.875	-63.1875	-62.9625	-63.7188	-56.5375	-58.7562	-60.0625	-61.1312	-59.0594
		0.26	3.06	-61.6156	-61.5875	-56.8906	-54.6375	-62.45	-55.1125	-56.475	-61.8594	-63.1281	-63	-63.7531	-56.6094	-58.8094	-60.0844	-61.1562	-59.2313
		0.26	3.08	-61.5187	-61.6781	-56.9156	-54.6031	-62.5687	-55.1625	-56.5187	-61.8812	-63.2062	-62.9688	-63.7656	-56.6375	-58.9469	-60.2031	-61.3	-59.3438
		0.26	3.1	-61.6219	-61.6969	-56.9625	-54.7156	-62.6562	-55.2094	-56.5406	-61.9469	-63.2812	-63.0281	-63.8344	-56.7344	-59.025	-60.3312	-61.3875	-59.4313
		0.26	3.12	-61.7313	-61.7687	-57.0781	-54.8031	-62.6344	-55.2906	-56.65	-61.9938	-63.3063	-63.0719	-63.8563	-56.8719	-59.0719	-60.3625	-61.4062	-59.5438
		0.26	3.14	-61.7188	-61.8625	-57.1063	-54.7969	-62.6844	-55.3219	-56.6844	-62.0125	-63.35	-63.0469	-63.8719	-56.95	-59.1969	-60.3937	-61.4469	-59.6562
		0.26	3.16	-61.7719	-61.8031	-57.0812	-54.9406	-62.7188	-55.3531	-56.7094	-62.0406	-63.4656	-63.1375	-63.925	-57.0219	-59.325	-60.4406	-61.5469	-59.6937
		0.26	3.18	-61.8219	-61.8187	-57.1906	-55.0187	-62.7656	-55.4844	-56.7438	-62.15	-63.5125	-63.1875	-64	-57.1437	-59.35	-60.5469	-61.6375	-59.8187
		0.26	3.2	-61.8594	-61.9062	-57.2062	-55.0187	-62.7625	-55.5625	-56.8125	-62.1219	-63.5312	-63.175	-64.0875	-57.2125	-59.4344	-60.5875	-61.625	-59.9219
		0.26	3.22	-61.8719	-61.9125	-57.2156	-55.1063	-62.8937	-55.5812	-56.825	-62.1375	-63.6125	-63.2438	-64.0563	-57.25	-59.5062	-60.7	-61.6844	-59.95
		0.26	3.24	-61.95	-61.9344	-57.25	-55.1594	-62.9188	-55.6531	-56.8688	-62.2375	-63.6937	-63.2719	-64.1219	-57.3688	-59.55	-60.8	-61.7938	-60.0281
		0.26	3.26	-62.0062	-62.0375	-57.3906	-55.2656	-62.9562	-55.75	-57	-62.2969	-63.7219	-63.2906	-64.175	-57.4656	-59.5969	-60.8531	-61.8344	-60.1719
		0.26	3.28	-62.0312	-62.0687	-57.3906	-55.2938	-63.0312	-55.8344	-57.1031	-62.2906	-63.75	-63.3125	-64.1594	-57.5344	-59.7	-60.875	-61.8219	-60.2656
		0.26	3.3	-62.1	-62.1469	-57.4062	-55.3969	-63.1219	-55.8438	-57.1125	-62.3875	-63.8406	-63.3875	-64.2125	-57.5656	-59.8156	-60.9219	-61.9375	-60.2594
		0.26	3.32	-62.1344	-62.1906	-57.5375	-55.3937	-63.1188	-55.9469	-57.1656	-62.4594	-63.9	-63.4375	-64.3313	-57.65	-59.8031	-60.9938	-62.0187	-60.3875
		0.26	3.34	-62.1937	-62.1969	-57.5875	-55.3906	-63.1875	-56.0312	-57.2375	-62.475	-63.8812	-63.5344	-64.4156	-57.775	-59.8969	-61.025	-62.0875	-60.475
		0.26	3.36	-62.2156	-62.2094	-57.5531	-55.5031	-63.2594	-56.0062	-57.25	-62.5219	-63.9719	-63.5687	-64.4375	-57.7719	-60.0031	-61.05	-62.0687	-60.5187
		0.26	3.38	-62.3125	-62.3	-57.5625	-55.5938	-63.2469	-56.0312	-57.2188	-62.6406	-64.05	-63.5781	-64.4969	-57.7625	-60.0125	-61.0906	-62.1375	-60.5656
		0.26	3.4	-62.3844	-62.3	-57.6469	-55.5938	-63.2875	-56.1188	-57.3156	-62.6781	-64.0531	-63.6625	-64.5875	-57.8563	-60.025	-61.2031	-62.2469	-60.675
		0.26	3.42	-62.3563	-62.3187	-57.6562	-55.7062	-63.3781	-56.2062	-57.3688	-62.675	-64.0719	-63.6562	-64.5875	-57.9656	-60.175	-61.2313	-62.2812	-60.75
		0.26	3.44	-62.4188	-62.4094	-57.7125	-55.7844	-63.4	-56.1625	-57.375	-62.7875	-64.225	-63.6344	-64.5875	-57.9844	-60.2562	-61.2406	-62.3594	-60.825
		0.26	3.46	-62.5312	-62.4125	-57.7031	-55.7938	-63.4531	-56.2313	-57.4094	-62.8031	-64.275	-63.7438	-64.6625	-58.0938	-60.25	-61.325	-62.3688	-60.8688
		0.26	3.48	-62.5219	-62.4594	-57.7719	-55.8438	-63.5844	-56.2875	-57.5125	-62.8406	-64.2625	-63.8219	-64.7344	-58.1969	-60.3375	-61.375	-62.3844	-60.9375
		0.26	3.5	-62.5594	-62.5469	-57.7562	-55.9313	-63.6469	-56.3594	-57.5312	-62.8688	-64.3438	-63.8812	-64.7188	-58.1906	-60.4281	-61.4437	-62.45	-60.9188
		0.26	3.52	-62.6406	-62.5969	-57.8125	-55.9562	-63.5812	-56.4156	-57.4906	-62.9906	-64.4563	-63.9531	-64.7375	-58.2594	-60.4375	-61.45	-62.4531	-61.0438
		0.26	3.54	-62.6625	-62.6188	-57.9	-55.95	-63.6531	-56.5281	-57.55	-63	-64.4844	-63.9781	-64.8187	-58.3812	-60.4781	-61.4875	-62.55	-61.1625
		0.26	3.56	-62.6531	-62.7062	-57.9	-56.0344	-63.7438	-56.5469	-57.6125	-63.025	-64.4844	-64.0875	-64.8438	-58.4406	-60.6312	-61.55	-62.6281	-61.1719
		0.26	3.58	-62.6906	-62.725	-57.9	-56.1375	-63.75	-56.5187	-57.6312	-63.1344	-64.5375	-64.1188	-64.8594	-58.4344	-60.6625	-61.575	-62.6344	-61.2
		0.26	3.6	-62.7812	-62.7812	-57.9281	-56.1	-63.825	-56.6312	-57.7062	-63.2469	-64.6219	-64.1625	-64.9875	-58.4813	-60.6312	-61.5781	-62.6969	-61.3063
		0.26	3.62	-62.775	-62.8875	-58.0125	-56.1312	-63.9	-56.75	-57.7687	-63.2938	-64.5719	-64.1937	-65.0594	-58.5938	-60.7594	-61.65	-62.8312	-61.3406
		0.26	3.64	-62.8	-62.9156	-57.95	-56.1969	-63.9313	-56.775	-57.75	-63.3219	-64.6719	-64.2719	-65.0531	-58.6406	-60.8375	-61.725	-62.8438	-61.3312
		0.26	3.66	-62.9344	-62.9781	-57.975	-56.25	-63.9656	-56.7875	-57.8187	-63.425	-64.8125	-64.3063	-65.1438	-58.6719	-60.8156	-61.7094	-62.8	-61.4094
		0.26	3.68	-63.0312	-63.0344	-58.0875	-56.25	-64.0625	-56.8469	-57.9094	-63.4594	-64.8125	-64.4313	-65.2375	-58.7594	-60.8438	-61.775	-62.85	-61.4719
		0.26	3.7	-63.0281	-63.05	-58.1469	-56.3469	-64.0625	-56.8937	-57.8906	-63.4594	-64.8031	-64.4563	-65.2125	-58.8312	-60.9156	-61.85	-62.9562	-61.5125
		0.26	3.72	-63.125	-63.0812	-58.1188	-56.35	-64.0719	-56.9062	-57.9	-63.5406	-64.8875	-64.4938	-65.2594	-58.8406	-61.0031	-61.8531	-62.9906	-61.5563
		0.26	3.74	-63.1875	-63.1906	-58.1813	-56.3812	-64.1625	-56.975	-57.9719	-63.6281	-64.9656	-64.6312	-65.325	-58.8688	-60.95	-61.8344	-63.025	-61.6469
		0.26	3.76	-63.175	-63.1937	-58.2406	-56.5	-64.25	-57.0406	-58.0219	-63.6625	-65.0094	-64.6719	-65.35	-58.9875	-61.0469	-61.975	-63.0531	-61.725
		0.26	3.78	-63.1906	-63.2281	-58.2031	-56.575	-64.3125	-57.075	-58.025	-63.7281	-65.0938	-64.675	-65.3594	-58.9531	-61.1625	-62.0281	-63.1125	-61.725
		0.26	3.8	-63.2719	-63.3125	-58.2344	-56.5469	-64.3656	-57.0687	-58.0719	-63.7656	-65.125	-64.8187	-65.4406	-58.9437	-61.1469	-62.0281	-63.1094	-61.8094
		0.26	3.82	-63.3281	-63.3219	-58.2969	-56.5844	-64.4313	-57.1406	-58.0844	-63.8	-65.1937	-64.85	-65.4625	-59.0438	-61.1906	-62.0312	-63.15	-61.8563
		0.26	3.84	-63.275	-63.375	-58.3125	-56.6937	-64.4	-57.1594	-58.05	-63.8094	-65.1687	-64.9187	-65.4844	-59.1469	-61.2844	-62.1063	-63.2219	-61.8375
		0.26	3.86	-63.4	-63.4938	-58.3156	-56.6937	-64.45	-57.2125	-58.125	-63.8656	-65.2	-65	-65.6344	-59.15	-61.3438	-62.15	-63.1969	-61.9
		0.26	3.88	-63.5062	-63.5312	-58.375	-56.675	-64.5312	-57.2406	-58.1719	-63.9469	-65.3125	-65.0062	-65.5969	-59.225	-61.2844	-62.1688	-63.2094	-62.0094
		0.26	3.9	-63.55	-63.5062	-58.4688	-56.775	-64.5687	-57.325	-58.1437	-63.9437	-65.35	-65.0656	-65.6531	-59.3063	-61.3563	-62.225	-63.2781	-61.9938
		0.26	3.92	-63.5281	-63.6063	-58.3937	-56.7812	-64.5875	-57.3156	-58.2062	-64.0219	-65.3812	-65.1094	-65.7312	-59.3531	-61.4219	-62.2875	-63.3375	-62.0125
		0.26	3.94	-63.6281	-63.575	-58.4313	-56.7594	-64.6813	-57.3156	-58.2906	-64.15	-65.4875	-65.1188	-65.7438	-59.3563	-61.4313	-62.2438	-63.2969	-62.1406
		0.26	3.96	-63.6625	-63.6156	-58.5094	-56.8156	-64.7406	-57.3937	-58.2812	-64.15	-65.5375	-65.2219	-65.7594	-59.3594	-61.4344	-62.2531	-63.4062	-62.1625
		0.26	3.98	-63.6688	-63.7	-58.4531	-56.875	-64.7438	-57.4	-58.3281	-64.1625	-65.525	-65.325	-65.8812	-59.4062	-61.5	-62.3812	-63.4531	-62.15
		0.26	4	-63.6937	-63.7625	-58.4781	-56.8688	-64.7656	-57.4125	-58.3875	-64.2375	-65.6188	-65.3094	-65.8844	-59.4469	-61.5469	-62.3563	-63.4	-62.2156
		0.26	4.02	-63.7375	-63.7656	-58.5312	-56.8688	-64.8375	-57.5	-58.425	-64.2812	-65.7	-65.4	-65.8781	-59.425	-61.5469	-62.3625	-63.4062	-62.3
		0.26	4.04	-63.725	-63.8656	-58.5875	-56.9406	-64.8688	-57.5469	-58.4344	-64.2719	-65.6719	-65.4469	-65.9875	-59.4531	-61.6	-62.4437	-63.5187	-62.3094
		0.26	4.06	-63.8281	-63.9156	-58.5687	-56.9781	-64.9	-57.5656	-58.4844	-64.3	-65.6906	-65.3938	-65.9812	-59.5406	-61.6375	-62.4656	-63.5563	-62.3688
		0.26	4.08	-63.9375	-63.95	-58.5719	-56.9938	-64.9906	-57.5938	-58.475	-64.4156	-65.7625	-65.4719	-66.0062	-59.5438	-61.6156	-62.4625	-63.5281	-62.4219
		0.26	4.1	-63.95	-64.0156	-58.6188	-57.0187	-65.0125	-57.6594	-58.5125	-64.4531	-65.8469	-65.5094	-66.0437	-59.5406	-61.6125	-62.5219	-63.5812	-62.4281
		0.26	4.12	-63.9844	-64.0375	-58.6	-57.075	-65.0031	-57.6562	-58.5656	-64.475	-65.8469	-65.5406	-66.0281	-59.6312	-61.6937	-62.5687	-63.5187	-62.4313
		0.26	4.14	-64.0469	-64.0406	-58.5438	-57.0344	-65.05	-57.6156	-58.5156	-64.575	-65.9281	-65.6813	-66.1062	-59.6937	-61.7469	-62.5563	-63.5687	-62.5219
		0.26	4.16	-64.1	-64.1	-58.6406	-57.1094	-65.1469	-57.6562	-58.5625	-64.6	-66.0375	-65.6937	-66.1656	-59.6656	-61.6656	-62.5781	-63.6312	-62.5687
		0.26	4.18	-64.1094	-64.1687	-58.6844	-57.15	-65.15	-57.7469	-58.6063	-64.6375	-66.0094	-65.6875	-66.2	-59.7188	-61.775	-62.675	-63.6125	-62.5594
		0.26	4.2	-64.1344	-64.1406	-58.7	-57.1969	-65.175	-57.75	-58.5563	-64.6719	-66.0125	-65.75	-66.2094	-59.8187	-61.8281	-62.6531	-63.5625	-62.5844
		0.26	4.22	-64.1906	-64.2469	-58.7094	-57.1437	-65.2375	-57.7781	-58.6156	-64.7812	-66.0938	-65.8281	-66.2875	-59.7938	-61.8187	-62.6906	-63.6375	-62.6312
		0.26	4.24	-64.2094	-64.3156	-58.7719	-57.2125	-65.3	-57.8625	-58.6844	-64.7937	-66.1406	-65.8156	-66.2656	-59.7812	-61.85	-62.7625	-63.65	-62.6406
		0.26	4.26	-64.1937	-64.2344	-58.7406	-57.2531	-65.2344	-57.8688	-58.6094	-64.7781	-66.1625	-65.875	-66.3375	-59.8531	-61.9281	-62.6937	-63.6844	-62.6844
		0.26	4.28	-64.2656	-64.3031	-58.7344	-57.2156	-65.3313	-57.8688	-58.7	-64.8906	-66.1625	-65.8875	-66.3969	-59.9031	-61.95	-62.7094	-63.7469	-62.7344
		0.26	4.3	-64.3219	-64.3625	-58.8187	-57.3	-65.3938	-57.8563	-58.7125	-64.9406	-66.2125	-65.925	-66.4062	-59.85	-61.8969	-62.825	-63.7719	-62.7594
		0.26	4.32	-64.3094	-64.4187	-58.8219	-57.3281	-65.375	-57.9813	-58.7406	-64.8938	-66.2531	-65.9969	-66.4688	-59.8781	-61.9313	-62.8	-63.7	-62.7562
		0.26	4.34	-64.35	-64.3594	-58.7969	-57.2844	-65.4219	-58.0156	-58.7938	-64.9719	-66.2844	-66.05	-66.5375	-59.9281	-62.0344	-62.8406	-63.8031	-62.8563
		0.26	4.36	-64.3812	-64.4594	-58.8187	-57.3438	-65.525	-57.9781	-58.825	-65	-66.2844	-66.0469	-66.4969	-59.9437	-62.075	-62.8844	-63.8469	-62.8906
		0.26	4.38	-64.4344	-64.4875	-58.8531	-57.4344	-65.5	-58.0406	-58.8469	-65.0437	-66.3969	-66.1813	-66.5875	-59.95	-62.0781	-62.8187	-63.8	-62.8563
		0.26	4.4	-64.4344	-64.5	-58.8594	-57.4938	-65.4969	-58.0938	-58.85	-65.0594	-66.4281	-66.2063	-66.625	-60.0219	-62.1125	-62.85	-63.8156	-62.8688
		0.26	4.42	-64.475	-64.5781	-58.825	-57.4375	-65.575	-58.0812	-58.8688	-65.1156	-66.4531	-66.1406	-66.5969	-60.0844	-62.1656	-62.9219	-63.8625	-62.9156
		0.26	4.44	-64.5719	-64.625	-58.9313	-57.4906	-65.65	-58.025	-58.8656	-65.1937	-66.5219	-66.2219	-66.6656	-60.0531	-62.15	-62.8594	-63.8281	-62.9656
		0.26	4.46	-64.6	-64.5875	-58.925	-57.5875	-65.6438	-58.1	-58.9375	-65.2219	-66.5969	-66.2344	-66.6906	-60.0812	-62.1469	-62.9625	-63.9188	-62.9437
		0.26	4.48	-64.6188	-64.7094	-58.8875	-57.5156	-65.6906	-58.1656	-58.9437	-65.2438	-66.6031	-66.2875	-66.7188	-60.1625	-62.1813	-63	-63.9188	-63.0156
		0.26	4.5	-64.7281	-64.7094	-58.9469	-57.5406	-65.7344	-58.1156	-58.9375	-65.3	-66.575	-66.3656	-66.8063	-60.1437	-62.2	-62.9281	-63.875	-63.0281
		0.26	4.52	-64.7438	-64.7063	-59	-57.6	-65.7312	-58.1594	-59.0062	-65.3719	-66.6	-66.3344	-66.7844	-60.1312	-62.1813	-63.025	-63.9594	-63.0062
		0.26	4.54	-64.7063	-64.8156	-58.95	-57.6375	-65.7469	-58.1562	-58.9969	-65.4	-66.6625	-66.4156	-66.8	-60.2281	-62.2406	-63.0281	-63.9875	-63.0438
		0.26	4.56	-64.7531	-64.8688	-58.9062	-57.6031	-65.8156	-58.1906	-58.9406	-65.4219	-66.725	-66.4719	-66.8781	-60.2188	-62.3438	-62.9969	-63.9813	-63.0938
		0.26	4.58	-64.7906	-64.85	-58.9719	-57.625	-65.8906	-58.225	-59.0625	-65.5281	-66.7562	-66.4563	-66.8875	-60.1844	-62.3469	-63.0969	-64.0625	-63.0844
		0.26	4.6	-64.7937	-64.9062	-59.0344	-57.6688	-65.8875	-58.2875	-59.0625	-65.5719	-66.8375	-66.5	-66.9406	-60.3	-62.3312	-63.15	-64.0594	-63.0687
		0.26	4.62	-64.8562	-64.9969	-59.0219	-57.625	-65.9156	-58.3187	-59.1063	-65.5469	-66.8844	-66.5813	-67.0094	-60.2938	-62.4094	-63.125	-64.0844	-63.1625
		0.26	4.64	-64.9156	-64.9938	-59.0469	-57.6437	-65.975	-58.375	-59.1531	-65.6469	-66.8625	-66.6375	-66.9656	-60.3	-62.4469	-63.1844	-64.1406	-63.2188
		0.26	4.66	-64.9437	-65.025	-59.0938	-57.7156	-65.9938	-58.3719	-59.1125	-65.6875	-66.8812	-66.6312	-66.9938	-60.4	-62.4375	-63.1937	-64.1219	-63.2188
		0.26	4.68	-64.9906	-65.1156	-59.0625	-57.75	-65.9812	-58.4906	-59.1688	-65.6281	-66.95	-66.6875	-66.9875	-60.3969	-62.4938	-63.1875	-64.0625	-63.1969
		0.26	4.7	-65.025	-65.1156	-59.0312	-57.7875	-66.0156	-58.5031	-59.2469	-65.6219	-66.9938	-66.6562	-66.9781	-60.3438	-62.5	-63.2125	-64.1531	-63.275
		0.26	4.72	-65.1281	-65.1031	-59.1156	-57.7938	-66.0781	-58.5	-59.1875	-65.7063	-67.0031	-66.6937	-67.0437	-60.425	-62.5438	-63.2125	-64.1312	-63.2781
		0.26	4.74	-65.1	-65.1594	-59.1625	-57.8	-66.0594	-58.55	-59.1781	-65.7438	-67.0687	-66.7438	-67.0906	-60.45	-62.5187	-63.1813	-64.15	-63.2625
		0.26	4.76	-65.0344	-65.1656	-59.1188	-57.775	-66.0719	-58.575	-59.2375	-65.6937	-67.1094	-66.7562	-67.1094	-60.3969	-62.5469	-63.2875	-64.2125	-63.3312
		0.26	4.78	-65.1344	-65.1094	-59.0875	-57.7625	-66.1656	-58.5375	-59.2094	-65.775	-67.1094	-66.8187	-67.1906	-60.4594	-62.6	-63.2719	-64.15	-63.4
		0.26	4.8	-65.1625	-65.1781	-59.15	-57.8469	-66.1188	-58.5312	-59.2687	-65.8562	-67.1	-66.9187	-67.1813	-60.5375	-62.5938	-63.2875	-64.2	-63.3656
		0.26	4.82	-65.1813	-65.2156	-59.1875	-57.8469	-66.175	-58.6031	-59.2594	-65.8344	-67.1906	-66.8688	-67.15	-60.475	-62.65	-63.3594	-64.2594	-63.3969
		0.26	4.84	-65.1594	-65.1937	-59.15	-57.8	-66.3	-58.6969	-59.2031	-65.7875	-67.1781	-66.8906	-67.2562	-60.5781	-62.6781	-63.325	-64.25	-63.45
		0.26	4.86	-65.2438	-65.0719	-59.2031	-57.9	-66.2937	-58.6813	-59.2844	-65.9156	-67.125	-66.9219	-67.25	-60.6	-62.7188	-63.3312	-64.3344	-63.4719
		0.26	4.88	-65.2469	-65.3156	-59.2625	-57.9	-66.225	-58.6656	-59.2719	-65.9406	-67.175	-66.9156	-67.25	-60.5656	-62.6813	-63.3688	-64.325	-63.4375
		0.26	4.9	-65.1813	-65.3625	-59.2281	-57.9156	-66.3469	-58.6969	-59.25	-65.8688	-67.225	-66.9812	-67.2906	-60.6437	-62.7125	-63.325	-64.3094	-63.4875
		0.26	4.92	-65.3	-65.2719	-59.2219	-57.925	-66.4187	-58.6719	-59.2969	-65.9688	-67.2594	-67.0594	-67.2875	-60.6469	-62.7562	-63.375	-64.3125	-63.5625
		0.26	4.94	-65.3375	-65.4156	-59.225	-57.9625	-66.3812	-58.65	-59.2906	-66.0437	-67.3219	-67.0719	-67.3562	-60.6188	-62.8063	-63.4938	-64.3031	-63.525
		0.26	4.96	-65.2406	-65.425	-59.2781	-57.9594	-66.4125	-58.6562	-59.2812	-66.025	-67.3656	-67.075	-67.4437	-60.7156	-62.7625	-63.4625	-64.2531	-63.5375
		0.26	4.98	-65.2937	-65.3781	-59.2719	-57.9375	-66.4656	-58.6937	-59.3844	-66.0594	-67.3906	-67.1281	-67.3969	-60.75	-62.8312	-63.5312	-64.3187	-63.5938
		0.36	0	-61.6719	-61.1719	-60.525	-60.6656	-62.0594	-62.4625	-61.4969	-61.2281	-63.5	-63.7844	-63.7562	-63.875	-66.1469	-66.2781	-66.8438	-66.2937
		0.36	0.02	-61.7031	-61.2406	-60.4813	-60.7687	-62.1	-62.4875	-61.4344	-61.25	-63.6219	-63.7687	-63.7938	-63.9375	-66.0969	-66.3156	-66.8688	-66.2875
		0.36	0.04	-61.6437	-61.2594	-60.4813	-60.7969	-62.0594	-62.5	-61.475	-61.2844	-63.4844	-63.7438	-63.7281	-63.9531	-66.0906	-66.3125	-66.8969	-66.325
		0.36	0.06	-61.6875	-61.1531	-60.5531	-60.7438	-62.0312	-62.425	-61.4688	-61.2469	-63.4437	-63.8125	-63.7219	-63.9469	-66.1062	-66.2625	-66.8469	-66.3125
		0.36	0.08	-61.7156	-61.2125	-60.5281	-60.7062	-62.1312	-62.4813	-61.45	-61.2938	-63.5312	-63.7875	-63.7969	-63.925	-66.0875	-66.3469	-66.8812	-66.25
		0.36	0.1	-61.6469	-61.2156	-60.4594	-60.7906	-62.0938	-62.4719	-61.4313	-61.2875	-63.4906	-63.7781	-63.775	-63.9469	-66.1406	-66.325	-66.9031	-66.3406
		0.36	0.12	-61.6406	-61.15	-60.475	-60.8187	-62.1219	-62.4844	-61.4844	-61.1969	-63.45	-63.7812	-63.7906	-63.9375	-66.1719	-66.2844	-66.825	-66.3094
		0.36	0.14	-61.7	-61.1	-60.4344	-60.7687	-62.1188	-62.4813	-61.45	-61.2594	-63.3906	-63.7281	-63.7469	-63.9125	-66.1375	-66.3094	-66.8781	-66.2594
		0.36	0.16	-61.65	-61.15	-60.3719	-60.7687	-62.075	-62.4906	-61.3969	-61.2438	-63.5	-63.7594	-63.65	-63.8781	-66.1813	-66.2812	-66.8844	-66.25
		0.36	0.18	-61.6875	-61.2094	-60.3812	-60.8187	-62.0687	-62.4562	-61.4437	-61.1969	-63.45	-63.7969	-63.6063	-63.9219	-66.1844	-66.2656	-66.8438	-66.3094
		0.36	0.2	-61.6969	-61.1156	-60.45	-60.7719	-62.1656	-62.425	-61.4062	-61.2687	-63.4062	-63.7781	-63.5906	-63.9125	-66.1281	-66.3562	-66.9375	-66.2625
		0.36	0.22	-61.6281	-61.1875	-60.4875	-60.75	-62.1094	-62.4625	-61.4188	-61.2906	-63.525	-63.775	-63.475	-63.9062	-66.1469	-66.325	-66.9844	-66.25
		0.36	0.24	-61.6813	-61.2	-60.475	-60.7562	-62.1094	-62.4375	-61.475	-61.2313	-63.4688	-63.8219	-63.3625	-63.9406	-66.1875	-66.3	-66.9094	-66.2937
		0.36	0.26	-61.7594	-61.1719	-60.5438	-60.7062	-62.1625	-62.4906	-61.4688	-61.275	-63.4562	-63.7687	-63.3594	-63.925	-66.1562	-66.3219	-66.8719	-66.3094
		0.36	0.28	-61.7	-61.15	-60.5094	-60.6937	-62.1562	-62.475	-61.4188	-61.35	-63.5469	-63.8312	-63.3312	-63.9219	-66.175	-66.3313	-66.9	-66.2562
		0.36	0.3	-61.7156	-61.2125	-60.4938	-60.6813	-62.0687	-62.4437	-61.4594	-61.2687	-63.5344	-63.7938	-63.2594	-63.95	-66.2094	-66.2906	-66.8875	-66.3063
		0.36	0.32	-61.6969	-61.2062	-60.5375	-60.7125	-62.1219	-62.5312	-61.5062	-61.3063	-63.45	-63.7438	-63.3219	-63.9062	-66.1969	-66.325	-66.8688	-66.3063
		0.36	0.34	-61.6562	-61.1344	-60.5312	-60.7313	-62.0906	-62.4844	-61.3844	-61.4031	-63.5344	-63.8	-63.3375	-63.9219	-66.1781	-66.3313	-66.95	-66.2594
		0.36	0.36	-61.7	-61.1188	-60.475	-60.7	-62.0687	-62.4156	-61.4813	-61.3844	-63.5344	-63.7687	-63.3094	-63.9406	-66.2344	-66.3344	-66.9125	-66.2937
		0.36	0.38	-61.6688	-61.1531	-60.5	-60.7281	-62.1406	-62.475	-61.5375	-61.35	-63.4656	-63.8	-63.3563	-63.9156	-66.1844	-66.425	-66.8781	-66.325
		0.36	0.4	-61.6531	-61.1125	-60.5781	-60.75	-62.1219	-62.4375	-61.4313	-61.3875	-63.525	-63.7875	-63.3281	-63.9156	-66.175	-66.3844	-66.9406	-66.2875
		0.36	0.42	-61.3469	-60.7469	-60.2094	-60.35	-61.7125	-62.0812	-61.1344	-60.9781	-63.1625	-63.4562	-62.9375	-63.5563	-65.8594	-66.0656	-66.5719	-65.9781
		0.36	0.44	-63.7438	-63.2188	-62.6344	-62.7156	-64.1438	-64.4812	-63.4656	-63.3438	-65.6125	-66.0031	-65.45	-66.0406	-68.0656	-68.3875	-68.8281	-68.3219
		0.36	0.46	-67.7656	-67.3438	-66.75	-66.8812	-68.1625	-68.4344	-67.4281	-67.4187	-69.9844	-70.3562	-69.85	-70.4313	-72.1062	-72.2875	-72.7844	-72.1906
		0.36	0.48	-68.9437	-68.3344	-67.8187	-67.9688	-69.1813	-69.5531	-68.5406	-68.4125	-71.1438	-71.4812	-70.8187	-71.5781	-73.3031	-73.4844	-73.9469	-73.3313
		0.36	0.5	-68.3438	-67.7438	-67.1906	-67.3594	-68.6875	-69.0219	-68.05	-67.9062	-70.4313	-70.8406	-70.2656	-70.925	-72.8	-73.0219	-73.475	-72.9812
		0.36	0.52	-67.2906	-66.775	-66.1687	-66.35	-67.65	-67.9656	-66.9875	-66.9406	-69.2719	-69.6594	-69.2281	-69.7875	-71.7812	-72	-72.5219	-71.9594
		0.36	0.54	-66.25	-65.7031	-65.1188	-65.3	-66.6156	-67.0062	-65.95	-65.8	-68.0969	-68.3719	-67.9094	-68.5437	-70.6875	-70.9563	-71.4719	-70.8469
		0.36	0.56	-65.3063	-64.75	-64.0687	-64.2937	-65.725	-66.1438	-65.075	-64.8875	-66.9688	-67.3781	-66.9	-67.5281	-69.725	-70.0406	-70.4563	-69.9
		0.36	0.58	-64.525	-64.0531	-63.3375	-63.5125	-65.0094	-65.3562	-64.3594	-64.2312	-66.1344	-66.5563	-66.1	-66.7531	-69.0469	-69.2625	-69.7844	-69.2469
		0.36	0.6	-64	-63.4531	-62.8281	-62.9906	-64.3938	-64.7875	-63.7375	-63.6	-65.5875	-65.8562	-65.4563	-66.1	-68.4187	-68.7375	-69.1656	-68.5875
		0.36	0.62	-63.5594	-63.025	-62.3688	-62.5312	-64.0125	-64.3781	-63.3656	-63.1562	-65.1312	-65.4844	-65.0031	-65.6844	-67.95	-68.1875	-68.6375	-68.15
		0.36	0.64	-63.2594	-62.65	-61.9906	-62.1844	-63.7375	-63.9906	-63.05	-62.8625	-64.7625	-65.1375	-64.6906	-65.3719	-67.6813	-67.825	-68.3625	-67.8281
		0.36	0.66	-63.0094	-62.4344	-61.8094	-61.9594	-63.4344	-63.725	-62.7875	-62.55	-64.5844	-64.8344	-64.4938	-65.1188	-67.4	-67.6062	-68.1062	-67.575
		0.36	0.68	-62.7844	-62.2812	-61.6094	-61.7	-63.2125	-63.55	-62.6219	-62.3406	-64.3969	-64.6844	-64.2625	-64.8875	-67.1875	-67.4344	-67.825	-67.3125
		0.36	0.7	-62.6188	-62.0469	-61.425	-61.5438	-63.1	-63.3563	-62.475	-62.25	-64.225	-64.5844	-64.125	-64.7469	-67.0938	-67.2812	-67.6375	-67.2219
		0.36	0.72	-62.5469	-61.8563	-61.3406	-61.4375	-62.8688	-63.2094	-62.2906	-62.0781	-64.1906	-64.4625	-64.0719	-64.5938	-66.9812	-67.175	-67.5375	-67.075
		0.36	0.74	-62.3937	-61.7812	-61.2844	-61.3594	-62.7687	-63.1125	-62.2281	-61.925	-64.0125	-64.3906	-63.85	-64.5625	-66.8438	-67.025	-67.3406	-66.9469
		0.36	0.76	-62.2812	-61.7469	-61.0812	-61.25	-62.7313	-63	-62.175	-61.9406	-63.9281	-64.2719	-63.775	-64.5	-66.7875	-66.9781	-67.1	-66.8781
		0.36	0.78	-62.225	-61.6688	-61.0094	-61.2313	-62.5875	-62.9844	-62.0531	-61.9031	-63.875	-64.1969	-63.7812	-64.3969	-66.7031	-66.9187	-67.2	-66.8375
		0.36	0.8	-62.0906	-61.5938	-61.0125	-61.1688	-62.5687	-62.9219	-61.9594	-61.8219	-63.8625	-64.2562	-63.7562	-64.3938	-66.5969	-66.8	-67.0531	-66.7375
		0.36	0.82	-62.1063	-61.5656	-60.9125	-61	-62.5969	-62.8469	-61.9656	-61.8219	-63.7719	-64.1625	-63.7219	-64.3156	-66.6031	-66.8406	-66.9812	-66.6625
		0.36	0.84	-62.0625	-61.4969	-60.8781	-60.975	-62.5187	-62.8187	-61.875	-61.7562	-63.7156	-64.0844	-63.7375	-64.2562	-66.5563	-66.7594	-67.0156	-66.725
		0.36	0.86	-61.9906	-61.4469	-60.8406	-60.9813	-62.4531	-62.7156	-61.7719	-61.6094	-63.75	-64.0906	-63.675	-64.2219	-66.4594	-66.6594	-66.8562	-66.725
		0.36	0.88	-61.9969	-61.4406	-60.8375	-60.9031	-62.4875	-62.6469	-61.7875	-61.6656	-63.6375	-64.0219	-63.6156	-64.1625	-66.4469	-66.7188	-66.7844	-66.5938
		0.36	0.9	-61.9875	-61.45	-60.7438	-60.9219	-62.4406	-62.7031	-61.75	-61.6562	-63.5844	-63.925	-63.6531	-64.1375	-66.4437	-66.6312	-66.7	-66.5938
		0.36	0.92	-61.9313	-61.3312	-60.7031	-60.9344	-62.3812	-62.625	-61.6844	-61.5844	-63.6656	-63.9906	-63.6188	-64.1219	-66.3719	-66.6125	-66.7312	-66.5656
		0.36	0.94	-61.9656	-61.3156	-60.7031	-60.8375	-62.4094	-62.6063	-61.6813	-61.5969	-63.6	-63.9313	-63.5812	-64.0906	-66.4281	-66.6344	-66.6687	-66.5219
		0.36	0.96	-61.9219	-61.3594	-60.7594	-60.8312	-62.275	-62.6375	-61.7188	-61.6375	-63.5563	-63.9906	-63.5406	-64.0563	-66.3812	-66.5719	-66.6844	-66.475
		0.36	0.98	-61.8937	-61.2687	-60.6781	-60.8312	-62.2562	-62.5781	-61.6625	-61.575	-63.65	-64.0125	-63.5187	-64.0969	-66.325	-66.5406	-66.6937	-66.5188
		0.36	1	-61.9062	-61.2562	-60.6625	-60.7719	-62.3344	-62.5438	-61.6656	-61.65	-63.5656	-63.8656	-63.3969	-64.0969	-66.3625	-66.5531	-66.6125	-66.5094
		0.36	1.02	-61.95	-61.3844	-60.7625	-60.85	-62.4	-62.6406	-61.8	-61.55	-63.5125	-63.9125	-63.4344	-64.0938	-66.3344	-66.55	-66.625	-66.4219
		0.36	1.04	-62.0344	-61.5812	-60.8469	-61.0031	-62.4344	-62.7687	-61.8906	-61.7	-63.5781	-63.9219	-63.3812	-64.0719	-66.3125	-66.5594	-66.6469	-66.4406
		0.36	1.06	-62.2344	-61.6844	-61.0062	-61.125	-62.65	-62.8812	-62	-62.0344	-63.5406	-63.8375	-63.3063	-64	-66.3781	-66.5719	-66.6125	-66.5094
		0.36	1.08	-62.4219	-61.8844	-61.3438	-61.3906	-62.8969	-63.1813	-62.2875	-62.15	-63.4594	-63.8625	-63.2781	-64	-66.4906	-66.5938	-66.6687	-66.5469
		0.36	1.1	-62.6375	-62.1875	-61.5531	-61.6437	-63.0563	-63.3844	-62.575	-62.4094	-63.5719	-63.9313	-63.3719	-64.0969	-66.5125	-66.7562	-66.8562	-66.5844
		0.36	1.12	-62.9625	-62.475	-61.7844	-61.8563	-63.3594	-63.6437	-62.8	-62.6719	-63.7062	-63.9781	-63.3688	-64.1344	-66.6406	-66.8938	-67.0031	-66.8156
		0.36	1.14	-63.25	-62.6813	-62.0625	-62.1969	-63.7406	-63.975	-63.1375	-62.975	-63.8438	-64.1344	-63.4313	-64.2906	-66.8125	-66.9969	-67.125	-66.975
		0.36	1.16	-63.5469	-62.9938	-62.4313	-62.5125	-64	-64.3	-63.45	-63.275	-64	-64.3187	-63.5875	-64.55	-66.9906	-67.225	-67.4	-67.1719
		0.36	1.18	-63.8656	-63.35	-62.6531	-62.7469	-64.3375	-64.65	-63.7125	-63.5312	-64.2312	-64.4656	-63.7375	-64.6562	-67.275	-67.4875	-67.6125	-67.4219
		0.36	1.2	-64.1031	-63.6656	-62.9344	-63.0187	-64.7375	-64.9938	-63.9719	-63.9313	-64.3875	-64.6687	-63.8375	-64.9	-67.4844	-67.6937	-67.8094	-67.6625
		0.36	1.22	-64.3906	-63.9437	-63.2687	-63.25	-64.9812	-65.3063	-64.3219	-64.2063	-64.6	-64.8469	-63.9688	-65.15	-67.7406	-68.0062	-68.1375	-67.8219
		0.36	1.24	-64.6813	-64.1844	-63.5312	-63.4375	-65.2719	-65.5469	-64.6	-64.5	-64.8875	-65	-64.1	-65.3031	-68.0094	-68.2375	-68.4125	-68.0656
		0.36	1.26	-64.9344	-64.4875	-63.7125	-63.6813	-65.5406	-65.9	-64.8719	-64.8187	-65.1781	-65.2156	-64.2344	-65.4938	-68.25	-68.45	-68.6156	-68.3562
		0.36	1.28	-65.2156	-64.5906	-63.9062	-63.7969	-65.8	-66.05	-65.125	-65.05	-65.3938	-65.4625	-64.3	-65.7094	-68.4281	-68.7156	-68.9156	-68.5687
		0.36	1.3	-65.5094	-64.725	-64.1531	-63.9062	-65.9594	-66.1844	-65.4094	-65.175	-65.6687	-65.6312	-64.3812	-65.8219	-68.7094	-68.9	-69.1875	-68.7562
		0.36	1.32	-65.7	-64.8094	-64.3	-64.0437	-66.2	-66.3438	-65.5594	-65.3625	-65.9375	-65.8313	-64.3844	-65.8719	-68.9344	-69.0875	-69.3938	-69.0188
		0.36	1.34	-65.9313	-64.95	-64.4125	-64.0813	-66.2469	-66.4	-65.825	-65.5	-66.1188	-65.9156	-64.4125	-66.0344	-69.1	-69.3438	-69.6375	-69.2188
		0.36	1.36	-66.1062	-64.9969	-64.6094	-64.1656	-66.3313	-66.375	-66.0062	-65.4781	-66.3625	-66.0062	-64.4125	-66.1	-69.2719	-69.4875	-69.8187	-69.4187
		0.36	1.38	-66.2406	-64.9688	-64.75	-64.2469	-66.4313	-66.3781	-66.05	-65.4531	-66.6438	-66.1656	-64.3719	-66.1469	-69.5219	-69.6625	-69.825	-69.6125
		0.36	1.4	-66.2625	-65.025	-64.8	-64.1562	-66.425	-66.3469	-66.1375	-65.4187	-66.7469	-66.2063	-64.3	-66.2469	-69.6	-69.8531	-69.8375	-69.8187
		0.36	1.42	-66.2156	-65.0406	-64.8219	-64.1594	-66.15	-66.1813	-66.1906	-65.275	-66.7844	-66.225	-64.1937	-66.15	-69.625	-69.7781	-69.8	-69.8562
		0.36	1.44	-65.9969	-64.9469	-64.7969	-64.1	-66.0844	-66.1156	-66.1281	-65.1375	-66.8281	-66.2406	-64.0594	-66.0375	-69.6406	-69.6969	-69.6219	-69.7312
		0.36	1.46	-65.6844	-64.8313	-64.6188	-63.8094	-65.8125	-65.9219	-65.9656	-64.9	-66.7438	-66.1188	-63.725	-65.9031	-69.4313	-69.4344	-69.425	-69.5406
		0.36	1.48	-65.25	-64.6125	-64.3	-63.35	-65.1625	-65.65	-65.7281	-64.55	-66.4719	-65.9437	-63.4188	-65.55	-69.0344	-68.9781	-69.1656	-69.1469
		0.36	1.5	-64.5594	-64.2656	-64.0219	-62.7969	-64.5719	-65.45	-65.3844	-64.1	-66.0813	-65.7	-62.9688	-65.1562	-68.5156	-68.375	-68.8187	-68.5031
		0.36	1.52	-63.8906	-63.7625	-63.5781	-61.9656	-63.7219	-65.0281	-64.7438	-63.5	-65.5125	-65.2188	-62.2938	-64.6687	-67.7781	-67.7562	-68.35	-67.7125
		0.36	1.54	-63.0563	-63.1031	-62.9188	-61.0938	-62.7	-64.5375	-64	-62.725	-64.7438	-64.4969	-61.5219	-63.9437	-66.8812	-66.9563	-67.7469	-66.8625
		0.36	1.56	-62.1031	-62.3875	-62.2969	-60.15	-61.55	-64.0219	-63.2313	-61.8187	-63.9906	-63.7188	-60.7469	-63.0438	-65.9812	-66.1188	-67.0969	-65.8375
		0.36	1.58	-61.175	-61.5344	-61.5625	-59.1	-60.3688	-63.4313	-62.3156	-60.8969	-63.125	-62.6	-59.7687	-62.1188	-64.95	-65.25	-66.2312	-64.6906
		0.36	1.6	-60.2219	-60.6125	-60.6594	-58.0938	-59.15	-62.725	-61.35	-59.875	-62.1	-61.4719	-58.6781	-60.9875	-63.8219	-64.2531	-65.2969	-63.5938
		0.36	1.62	-59.2156	-59.7156	-59.6406	-57.125	-57.7687	-61.975	-60.4375	-58.75	-61.1094	-60.3156	-57.6312	-59.85	-62.7969	-63.2156	-64.3562	-62.4656
		0.36	1.64	-58.1688	-58.7687	-58.7375	-56.05	-56.5281	-61.2188	-59.4719	-57.7	-60.2156	-59.0844	-56.5594	-58.7656	-61.8031	-62.3063	-63.3156	-61.3219
		0.36	1.66	-57.2938	-57.8375	-57.7875	-55.0687	-55.2781	-60.3906	-58.5938	-56.6437	-59.3	-57.925	-55.5375	-57.6437	-60.8812	-61.2687	-62.1969	-60.2844
		0.36	1.68	-56.3875	-57.0031	-56.8125	-54.1312	-53.9875	-59.6813	-57.7875	-55.5875	-58.3656	-56.9188	-54.7156	-56.55	-60.0812	-60.35	-61.225	-59.3781
		0.36	1.7	-55.5344	-56.2781	-55.9	-53.1219	-52.8844	-58.9469	-57.1219	-54.5906	-57.5594	-55.9188	-53.9594	-55.5531	-59.2969	-59.5125	-60.2	-58.5094
		0.36	1.72	-54.8469	-55.6125	-55.2188	-52.3156	-51.8469	-58.275	-56.3844	-53.7625	-56.8187	-55.0844	-53.2406	-54.5719	-58.55	-58.7062	-59.225	-57.6719
		0.36	1.74	-54.0969	-54.8906	-54.5312	-51.5438	-50.9125	-57.7281	-55.8031	-52.9062	-56.0938	-54.4	-52.5281	-53.6375	-57.9	-57.9938	-58.3844	-56.9875
		0.36	1.76	-53.5062	-54.3406	-53.875	-50.8187	-49.9969	-57.1656	-55.3344	-52.0781	-55.4531	-53.6312	-51.8656	-52.8688	-57.3438	-57.3969	-57.5719	-56.3906
		0.36	1.78	-53.0187	-53.9125	-53.375	-50.2	-49.2469	-56.6437	-54.8344	-51.3781	-55.0469	-53.0281	-51.2656	-52.1406	-56.7719	-56.7469	-56.825	-55.7938
		0.36	1.8	-52.4656	-53.4781	-52.9562	-49.6406	-48.3094	-56.3031	-54.3719	-50.7094	-54.5812	-52.5312	-50.6406	-51.4875	-56.3312	-56.1688	-56.175	-55.2562
		0.36	1.82	-52.0531	-53.0312	-52.4062	-49.0375	-46.5406	-55.9906	-54.0625	-50.0062	-54.1219	-51.9594	-50.0031	-51.0219	-55.925	-55.7188	-55.6531	-54.8281
		0.36	1.84	-51.7656	-52.6531	-51.9188	-48.5438	-43.75	-55.5906	-53.7781	-49.3625	-53.8469	-51.55	-49.5594	-50.5781	-55.5563	-55.2594	-55.1125	-54.4469
		0.36	1.86	-51.4156	-52.3937	-51.5	-47.9062	-39.6531	-55.3656	-53.4562	-48.5875	-53.6	-51.2656	-48.9844	-50.2	-55.1813	-54.8812	-54.6312	-54.0469
		0.36	1.88	-51.0969	-52.125	-51.0625	-46.8688	-33.9656	-55.1875	-53.2375	-47.1875	-53.2969	-50.8781	-48.4688	-49.9531	-55.0062	-54.675	-54.3219	-53.7656
		0.36	1.9	-50.9094	-51.8844	-50.6156	-45.0281	-26.3531	-54.9344	-53.1188	-44.9062	-53.1	-50.6312	-47.95	-49.6844	-54.7656	-54.375	-54.0125	-53.5187
		0.36	1.92	-50.725	-51.6719	-50.2125	-42.0125	-17.1125	-54.85	-52.9	-41.4656	-53.0125	-50.475	-47.1312	-49.4156	-54.5469	-54.1344	-53.6531	-53.2219
		0.36	1.94	-50.5312	-51.5094	-49.875	-37.85	-7.725	-54.75	-52.6844	-36.5	-52.8688	-50.1969	-45.425	-49.225	-54.4156	-54.0438	-53.4062	-53.0156
		0.36	1.96	-50.4219	-51.3469	-49.5687	-32.2219	0.475	-54.6344	-52.6094	-29.7437	-52.7375	-50.0375	-42.6688	-48.975	-54.2594	-53.8844	-53.2531	-52.8719
		0.36	1.98	-50.2188	-51.1562	-49.2812	-24.55	6.2625	-54.6625	-52.5375	-21.1469	-52.6969	-49.8812	-38.5656	-48.625	-54.0875	-53.8063	-53.0219	-52.7719
		0.36	2	-49.9969	-51.0375	-48.9844	-15.3281	9.0875	-54.7	-52.4313	-11.6156	-52.6656	-49.7	-32.8312	-47.9844	-54.05	-53.8469	-52.8187	-52.6312
		0.36	2.02	-49.9813	-50.9375	-48.7781	-6.14687	9.04062	-54.6625	-52.4281	-2.7	-52.5625	-49.6	-25.0063	-46.4781	-54.0438	-53.7875	-52.7031	-52.5625
		0.36	2.04	-49.9281	-50.8187	-48.4625	1.76562	6.36562	-54.7125	-52.4344	4.29063	-52.5375	-49.5781	-15.3062	-43.6688	-53.9375	-53.7344	-52.6	-52.5906
		0.36	2.06	-49.7656	-50.7406	-48.2625	7.43125	1.74063	-54.7844	-52.3969	8.5125	-52.6719	-49.3937	-5.06875	-39.6531	-53.9344	-53.8063	-52.4844	-52.5687
		0.36	2.08	-49.6437	-50.6469	-48.1094	10.1531	-4.08437	-54.7188	-52.3531	9.6625	-52.65	-49.3594	3.93438	-34.2469	-54.0344	-53.8969	-52.4656	-52.5094
		0.36	2.1	-49.5406	-50.5687	-48	9.93437	-10.7031	-54.7938	-52.375	8.04688	-52.6875	-49.3625	10.2312	-26.8781	-54.0156	-53.9437	-52.5125	-52.5875
		0.36	2.12	-49.4469	-50.5	-47.75	7.27187	-17.65	-54.8688	-52.4	4.11875	-52.7313	-49.1969	13.2656	-17.4969	-54.0656	-54.1031	-52.4656	-52.5938
		0.36	2.14	-49.4125	-50.4	-47.5625	2.62812	-24.3094	-54.8688	-52.3375	-1.225	-52.7562	-49.2	12.8062	-7.22813	-54.1781	-54.1781	-52.4156	-52.5594
		0.36	2.16	-49.325	-50.3719	-47.4406	-3.33437	-30.35	-54.8781	-52.2313	-7.55625	-52.7938	-49.2313	9.34375	2.08437	-54.2438	-54.2156	-52.4906	-52.6344
		0.36	2.18	-49.175	-50.3875	-47.1688	-10.0188	-35.8094	-55.0094	-52.2406	-14.5094	-52.85	-49.15	3.8	8.9625	-54.3	-54.3094	-52.5344	-52.6875
		0.36	2.2	-49.2	-50.3219	-46.75	-17.0156	-40.5156	-54.95	-52.2031	-21.4531	-52.9656	-49.1406	-3.07812	12.85	-54.4031	-54.4313	-52.4844	-52.7719
		0.36	2.22	-49.1594	-50.25	-45.8937	-23.7625	-44.5656	-54.925	-52.1375	-27.8594	-53.025	-49.2	-10.7719	13.3406	-54.525	-54.4844	-52.5344	-52.7844
		0.36	2.24	-49.0656	-50.2844	-44.1063	-29.9594	-47.9313	-54.9844	-52.1875	-33.725	-53.1031	-49.2313	-18.6719	10.625	-54.5531	-54.6344	-52.5969	-52.9031
		0.36	2.26	-49.0375	-50.3	-41.1781	-35.4938	-50.7313	-55.0219	-52.25	-38.8937	-53.25	-49.2313	-26.0844	5.5625	-54.6719	-54.7438	-52.6219	-53.0156
		0.36	2.28	-49.0219	-50.275	-37.0344	-40.2313	-52.9281	-55.0438	-52.225	-43.1781	-53.3344	-49.3438	-32.7594	-0.99375	-54.7781	-54.825	-52.6344	-53.0281
		0.36	2.3	-49	-50.2844	-31.5531	-44.2094	-54.7	-55.0844	-52.2031	-46.8219	-53.4	-49.375	-38.6281	-8.50625	-54.825	-54.9469	-52.7531	-53.0719
		0.36	2.32	-49.0406	-50.3281	-24.0969	-47.6469	-56.25	-55.0406	-52.2531	-49.9656	-53.5219	-49.4375	-43.55	-16.35	-54.8969	-55.0906	-52.8031	-53.2
		0.36	2.34	-49.0656	-50.3563	-15.0781	-50.4375	-57.4062	-55.0187	-52.2438	-52.4156	-53.6219	-49.6125	-47.6344	-23.8906	-55.025	-55.125	-52.8625	-53.3344
		0.36	2.36	-49.0438	-50.3438	-6.02187	-52.6937	-58.2719	-55.0531	-52.1625	-54.4156	-53.6813	-49.6813	-50.9875	-30.8281	-55.0344	-55.2938	-52.9437	-53.4125
		0.36	2.38	-49.025	-50.3625	1.85312	-54.525	-59.0406	-55.1	-52.2375	-56.0656	-53.7938	-49.7938	-53.7781	-36.9469	-55.2313	-55.4188	-53.0719	-53.4813
		0.36	2.4	-49.0875	-50.4125	7.50625	-56.0469	-59.5969	-55.0156	-52.3	-57.4	-53.9688	-50.0062	-55.8375	-42.1406	-55.3125	-55.475	-53.1125	-53.6219
		0.36	2.42	-49.1437	-50.4	10.3844	-57.2313	-59.9719	-55.0187	-52.3031	-58.3969	-54.0312	-50.125	-57.5812	-46.4906	-55.4875	-55.6031	-53.1813	-53.7
		0.36	2.44	-49.1719	-50.425	10.2563	-58.2344	-60.3219	-55.0812	-52.3375	-59.2438	-54.1406	-50.25	-59.0687	-50.1844	-55.5687	-55.7156	-53.3125	-53.7625
		0.36	2.46	-49.3	-50.4562	7.59688	-59.0156	-60.6562	-55.0563	-52.5	-59.9625	-54.2844	-50.4844	-60.1469	-53.0438	-55.6219	-55.7781	-53.4437	-53.8844
		0.36	2.48	-49.35	-50.575	3.05312	-59.6094	-60.7875	-55.0938	-52.5563	-60.475	-54.4188	-50.6156	-60.8594	-55.1562	-55.8094	-55.9656	-53.4813	-54.0406
		0.36	2.5	-49.4	-50.55	-2.775	-60.1125	-60.9156	-55.1656	-52.575	-60.8312	-54.4781	-50.6969	-61.5219	-57.0312	-55.8125	-56.1437	-53.6125	-54.1344
		0.36	2.52	-49.5406	-50.5781	-9.45312	-60.4875	-61.05	-55.1406	-52.6625	-61.1437	-54.5938	-50.8812	-62.0438	-58.5156	-55.95	-56.1969	-53.7969	-54.25
		0.36	2.54	-49.65	-50.6813	-16.3875	-60.7188	-61.0812	-55.1844	-52.7781	-61.35	-54.7562	-51.1656	-62.3531	-59.5812	-56.1688	-56.3594	-53.8375	-54.4031
		0.36	2.56	-49.725	-50.75	-23.0625	-60.9156	-61.0906	-55.3156	-52.8219	-61.5406	-54.8156	-51.1531	-62.5844	-60.5375	-56.2156	-56.5625	-53.9781	-54.5062
		0.36	2.58	-49.8531	-50.775	-29.2375	-61.0656	-61.1437	-55.3375	-52.9031	-61.6281	-54.9	-51.3563	-62.8156	-61.2	-56.3563	-56.5938	-54.225	-54.6219
		0.36	2.6	-49.975	-50.9313	-34.7781	-61.1125	-61.2031	-55.4	-52.9906	-61.7844	-55.0094	-51.6156	-62.9813	-61.6875	-56.5	-56.7594	-54.3219	-54.7719
		0.36	2.62	-50.05	-51.0219	-39.65	-61.2062	-61.1719	-55.5062	-53.0062	-61.7469	-55.15	-51.6688	-63.0156	-62.1063	-56.6	-56.9313	-54.3844	-54.9844
		0.36	2.64	-50.2	-51.0594	-43.7	-61.2625	-61.2	-55.5	-53.0656	-61.75	-55.1781	-51.9188	-63.0812	-62.4125	-56.7031	-56.9938	-54.5281	-55.1094
		0.36	2.66	-50.3656	-51.1594	-47.1406	-61.2594	-61.2	-55.5438	-53.1969	-61.7812	-55.2719	-52.1375	-63.15	-62.5812	-56.8688	-57.1125	-54.6625	-55.2125
		0.36	2.68	-50.4375	-51.2656	-50.0594	-61.3094	-61.1375	-55.7	-53.3563	-61.7531	-55.4375	-52.2469	-63.075	-62.7219	-57.0438	-57.3187	-54.7906	-55.4094
		0.36	2.7	-50.6344	-51.3219	-52.3812	-61.2781	-61.15	-55.7406	-53.45	-61.7	-55.5312	-52.4531	-63.075	-62.9125	-57.1125	-57.3719	-54.9625	-55.575
		0.36	2.72	-50.7687	-51.4094	-54.2281	-61.225	-61.1844	-55.6813	-53.5312	-61.7094	-55.6375	-52.5906	-63.1375	-62.9188	-57.2125	-57.5125	-55.1688	-55.6844
		0.36	2.74	-50.8531	-51.5594	-55.7656	-61.1969	-61.2313	-55.8187	-53.5875	-61.6781	-55.7938	-52.8063	-63.1125	-62.9656	-57.3812	-57.6719	-55.3312	-55.7969
		0.36	2.76	-50.9562	-51.6562	-56.9906	-61.2313	-61.1719	-55.9	-53.7469	-61.6094	-55.8656	-52.8812	-63.0469	-63.0844	-57.4719	-57.7687	-55.425	-56
		0.36	2.78	-51.1437	-51.6781	-57.9938	-61.1344	-61.2313	-55.9	-53.8063	-61.6375	-55.8937	-53.1031	-63.0563	-63.075	-57.625	-57.8719	-55.6	-56.1437
		0.36	2.8	-51.1937	-51.8375	-58.7281	-61.1844	-61.2906	-56.0094	-53.8781	-61.6031	-56.0406	-53.2719	-63.0687	-63.0406	-57.7625	-58.0062	-55.7781	-56.2625
		0.36	2.82	-51.3219	-51.9844	-59.3438	-61.2438	-61.2656	-56.1188	-54.0187	-61.575	-56.1406	-53.3438	-62.9813	-63.1	-57.8656	-58.0656	-55.8563	-56.3875
		0.36	2.84	-51.5281	-52.05	-59.8438	-61.1875	-61.2313	-56.1031	-54.1219	-61.5469	-56.2031	-53.5563	-62.9437	-63.0812	-57.9375	-58.1531	-56	-56.5687
		0.36	2.86	-51.5563	-52.2062	-60.1937	-61.2	-61.3281	-56.0656	-54.1094	-61.6063	-56.3344	-53.6875	-63.0062	-63.0531	-58.1188	-58.3219	-56.2188	-56.7062
		0.36	2.88	-51.6281	-52.3125	-60.4281	-61.1844	-61.3937	-56.3281	-54.1406	-61.6156	-56.45	-53.7844	-62.9656	-63.0344	-58.2781	-58.4406	-56.3563	-56.7781
		0.36	2.9	-51.8156	-52.4469	-60.675	-61.1312	-61.4156	-56.375	-54.2844	-61.5344	-56.5344	-53.9938	-62.9281	-63.0312	-58.2812	-58.5	-56.4813	-56.95
		0.36	2.92	-51.8812	-52.5594	-60.925	-61.1437	-61.4656	-56.3906	-54.3187	-61.575	-56.5656	-54.1031	-62.9656	-62.9781	-58.4594	-58.6656	-56.625	-57.1688
		0.36	2.94	-51.9125	-52.6688	-60.9688	-61.1719	-61.5	-56.5094	-54.3844	-61.6375	-56.6937	-54.1781	-62.9688	-62.9844	-58.5594	-58.7719	-56.7906	-57.2281
		0.36	2.96	-52.1219	-52.7562	-61.025	-61.1375	-61.5094	-56.4719	-54.5094	-61.625	-56.8094	-54.2906	-62.9406	-63.025	-58.625	-58.8406	-56.9188	-57.2812
		0.36	2.98	-52.1656	-52.8625	-61.0969	-61.1688	-61.5687	-56.5375	-54.5563	-61.5219	-56.8688	-54.4531	-63.025	-62.9125	-58.7687	-59.1375	-57.0125	-57.4313
		0.36	3	-52.2438	-53.0312	-61.1188	-61.225	-61.6156	-56.6531	-54.5656	-61.6469	-56.9094	-54.5406	-63.0281	-62.9469	-58.8375	-59.1	-57.2062	-57.5844
		0.36	3.02	-52.3812	-53.0281	-61.0875	-61.1813	-61.65	-56.6562	-54.675	-61.6625	-57.0375	-54.6625	-62.9875	-63.0219	-58.8937	-59.1281	-57.35	-57.675
		0.36	3.04	-52.5219	-53.1844	-61.0844	-61.2687	-61.6437	-56.7344	-54.7875	-61.5938	-57.075	-54.8656	-63.0094	-62.9094	-58.9844	-59.3469	-57.4344	-57.7969
		0.36	3.06	-52.5875	-53.2844	-61.1188	-61.3563	-61.75	-56.8219	-54.8344	-61.675	-57.1312	-54.9094	-63.1125	-62.9562	-59.1813	-59.3469	-57.5656	-57.9594
		0.36	3.08	-52.7313	-53.3	-61.1094	-61.3594	-61.7562	-56.8688	-54.9062	-61.7375	-57.2562	-54.9938	-63.1375	-63.0625	-59.2469	-59.45	-57.6906	-58.1
		0.36	3.1	-52.8625	-53.4156	-61.0031	-61.3375	-61.6781	-56.8688	-55.0125	-61.7687	-57.3344	-55.2156	-63.1312	-63.0812	-59.3125	-59.5875	-57.8094	-58.2031
		0.36	3.12	-53.0375	-53.5563	-61.0219	-61.4437	-61.7969	-56.95	-55.0938	-61.725	-57.3375	-55.2875	-63.225	-63.05	-59.4969	-59.7	-57.9094	-58.2844
		0.36	3.14	-53.0375	-53.6	-61.0969	-61.4344	-61.9344	-57.0625	-55.1	-61.8312	-57.4	-55.3875	-63.3219	-63.1094	-59.4906	-59.7375	-58.0781	-58.425
		0.36	3.16	-53.1281	-53.725	-61.0563	-61.4313	-61.9406	-57.0062	-55.1844	-61.9344	-57.5312	-55.4844	-63.2906	-63.0812	-59.5875	-59.8469	-58.2062	-58.5125
		0.36	3.18	-53.2938	-53.8375	-60.9938	-61.5031	-62.0156	-57.1375	-55.2687	-61.9125	-57.5344	-55.5438	-63.3563	-63.0656	-59.7	-59.9719	-58.25	-58.5656
		0.36	3.2	-53.3	-53.9156	-60.9844	-61.5031	-62.0781	-57.2062	-55.3312	-61.9344	-57.5625	-55.6344	-63.4625	-63.1875	-59.7781	-60.0094	-58.375	-58.7125
		0.36	3.22	-53.4688	-54.0062	-61.0187	-61.5469	-62.1312	-57.15	-55.3937	-62.0625	-57.6875	-55.7438	-63.4938	-63.2781	-59.8531	-60.1375	-58.5375	-58.8469
		0.36	3.24	-53.4938	-54.1063	-60.975	-61.6437	-62.1625	-57.2687	-55.4594	-62.0938	-57.7375	-55.9062	-63.5219	-63.2469	-59.9781	-60.2344	-58.65	-58.9031
		0.36	3.26	-53.5375	-54.1156	-60.9594	-61.65	-62.225	-57.3375	-55.5438	-62.1188	-57.8031	-55.9437	-63.6094	-63.3281	-60.15	-60.2719	-58.6625	-58.9875
		0.36	3.28	-53.6969	-54.2469	-60.9813	-61.6844	-62.3063	-57.3625	-55.5531	-62.1562	-57.875	-56.0875	-63.6594	-63.3719	-60.1344	-60.3312	-58.8563	-59.1
		0.36	3.3	-53.7531	-54.3531	-61.0187	-61.7938	-62.2812	-57.4125	-55.65	-62.2313	-57.975	-56.1813	-63.6437	-63.3875	-60.2062	-60.4594	-58.9875	-59.2094
		0.36	3.32	-53.825	-54.3969	-61.0281	-61.8063	-62.3688	-57.5187	-55.7625	-62.2469	-58.0062	-56.2125	-63.7313	-63.4406	-60.3406	-60.5187	-59.0406	-59.2938
		0.36	3.34	-53.9375	-54.4562	-60.9938	-61.825	-62.4406	-57.5375	-55.8531	-62.2687	-58.0031	-56.2969	-63.7781	-63.5594	-60.4094	-60.5438	-59.0875	-59.3781
		0.36	3.36	-54.0062	-54.5375	-61.0187	-61.9094	-62.4375	-57.5563	-55.8719	-62.3344	-58.0719	-56.4688	-63.8531	-63.5875	-60.4437	-60.6875	-59.2469	-59.5031
		0.36	3.38	-54.0156	-54.55	-61.0687	-61.9437	-62.4656	-57.6844	-55.95	-62.35	-58.1719	-56.4844	-63.8531	-63.6125	-60.5438	-60.7125	-59.3406	-59.5844
		0.36	3.4	-54.1688	-54.6781	-61.0281	-61.9406	-62.6	-57.6156	-56.0625	-62.3594	-58.175	-56.575	-63.9625	-63.7281	-60.6156	-60.7469	-59.425	-59.6688
		0.36	3.42	-54.3125	-54.7969	-61.0625	-62.0125	-62.6406	-57.6281	-56.1	-62.4719	-58.2094	-56.6844	-64.0094	-63.7156	-60.6	-60.875	-59.5219	-59.7562
		0.36	3.44	-54.2844	-54.8281	-61.1063	-62.0875	-62.6688	-57.7406	-56.0625	-62.6156	-58.2969	-56.7219	-63.9938	-63.7	-60.725	-60.9188	-59.6188	-59.8969
		0.36	3.46	-54.3906	-54.8656	-61.1375	-62.0781	-62.7469	-57.7719	-56.1562	-62.6156	-58.3563	-56.8063	-64.0687	-63.825	-60.75	-60.95	-59.675	-59.9594
		0.36	3.48	-54.5344	-54.8937	-61.1813	-62.1531	-62.8219	-57.8406	-56.2406	-62.6156	-58.3812	-56.9469	-64.1625	-63.8688	-60.7781	-61.0719	-59.7406	-59.9938
		0.36	3.5	-54.55	-54.9531	-61.2969	-62.2375	-62.8531	-57.9344	-56.25	-62.7719	-58.4406	-56.9906	-64.1312	-63.8906	-60.8656	-61.125	-59.9	-60.0938
		0.36	3.52	-54.6125	-55.0719	-61.325	-62.2438	-62.8875	-58.0062	-56.3125	-62.775	-58.5406	-57.0594	-64.1438	-63.9656	-60.9813	-61.1125	-59.9938	-60.1875
		0.36	3.54	-54.6969	-55.0875	-61.3875	-62.2812	-62.9938	-57.9813	-56.4156	-62.7687	-58.5938	-57.1875	-64.2188	-64.0469	-61.0219	-61.2125	-60.075	-60.225
		0.36	3.56	-54.75	-55.1906	-61.4406	-62.3563	-63.0375	-58.0844	-56.4625	-62.8906	-58.6531	-57.1312	-64.2906	-64.0312	-61.0875	-61.2969	-60.1375	-60.2687
		0.36	3.58	-54.8281	-55.2594	-61.4969	-62.3438	-63.0438	-58.15	-56.5094	-62.95	-58.7281	-57.1594	-64.3	-64.1062	-61.1906	-61.2812	-60.2812	-60.3469
		0.36	3.6	-54.9156	-55.3	-61.5375	-62.3688	-63.1437	-58.1156	-56.5906	-62.9469	-58.7438	-57.2375	-64.3969	-64.2625	-61.2344	-61.3937	-60.3438	-60.45
		0.36	3.62	-54.9844	-55.4125	-61.6312	-62.425	-63.2344	-58.1562	-56.6469	-62.9437	-58.7812	-57.2188	-64.4688	-64.2875	-61.2562	-61.4875	-60.3781	-60.4813
		0.36	3.64	-55.0156	-55.5062	-61.6937	-62.4656	-63.2219	-58.225	-56.6625	-63.0438	-58.85	-57.1969	-64.5	-64.3	-61.3656	-61.4844	-60.4594	-60.5563
		0.36	3.66	-55.125	-55.4844	-61.6781	-62.4844	-63.2438	-58.2938	-56.7219	-63.1625	-58.8594	-57.3187	-64.5344	-64.3938	-61.4281	-61.5812	-60.5406	-60.6594
		0.36	3.68	-55.1813	-55.6156	-61.75	-62.5812	-63.325	-58.2781	-56.8375	-63.2062	-58.8844	-57.3063	-64.6312	-64.4406	-61.4375	-61.6281	-60.5406	-60.75
		0.36	3.7	-55.175	-55.6594	-61.8063	-62.575	-63.3969	-58.3469	-56.8594	-63.3031	-58.8406	-57.325	-64.675	-64.4	-61.4469	-61.6188	-60.5563	-60.7469
		0.36	3.72	-55.2812	-55.6437	-61.7969	-62.5938	-63.425	-58.35	-56.8531	-63.375	-58.9375	-57.3906	-64.7219	-64.4594	-61.5594	-61.6531	-60.6625	-60.8063
		0.36	3.74	-55.4125	-55.7625	-61.8125	-62.7	-63.5125	-58.2906	-56.9125	-63.3812	-59.075	-57.4594	-64.7281	-64.5813	-61.5625	-61.775	-60.7969	-60.9313
		0.36	3.76	-55.3781	-55.75	-61.8844	-62.7812	-63.5844	-58.3719	-57.0125	-63.3781	-59.0344	-57.4281	-64.8125	-64.5938	-61.6469	-61.7938	-60.7719	-60.9406
		0.36	3.78	-55.4219	-55.7469	-61.8625	-62.7875	-63.6312	-58.45	-57.0094	-63.4844	-59.0969	-57.5031	-64.8594	-64.6438	-61.725	-61.7656	-60.85	-60.9781
		0.36	3.8	-55.5406	-55.875	-61.8688	-62.8969	-63.6688	-58.4219	-57.0094	-63.4969	-59.1875	-57.5938	-64.9125	-64.75	-61.7594	-61.8719	-60.9813	-61.0875
		0.36	3.82	-55.5156	-55.8875	-61.9594	-62.9406	-63.7313	-58.4656	-57.0969	-63.4875	-59.1937	-57.6188	-64.9781	-64.7781	-61.7625	-61.95	-60.9938	-61.1375
		0.36	3.84	-55.5563	-55.9437	-62.0062	-62.9062	-63.75	-58.55	-57.1688	-63.5812	-59.2	-57.675	-65.0281	-64.7937	-61.85	-61.9531	-61.0156	-61.175
		0.36	3.86	-55.6688	-56.0438	-62.0531	-62.9844	-63.775	-58.5125	-57.1719	-63.6469	-59.2906	-57.7875	-65.0594	-64.925	-61.9219	-62.025	-61.1312	-61.1937
		0.36	3.88	-55.6875	-56.0375	-62.1281	-63.0938	-63.8375	-58.5062	-57.2188	-63.6844	-59.3625	-57.85	-65.0813	-64.9156	-61.9094	-62.1344	-61.2375	-61.2687
		0.36	3.9	-55.7188	-56.0844	-62.1531	-63.0531	-63.875	-58.6	-57.2906	-63.6875	-59.3344	-57.8937	-65.175	-64.9469	-61.9437	-62.1219	-61.2344	-61.2875
		0.36	3.92	-55.8125	-56.1437	-62.1562	-63.0781	-63.8969	-58.6094	-57.2875	-63.8	-59.35	-58.0094	-65.2344	-64.975	-62.0375	-62.1688	-61.3	-61.3469
		0.36	3.94	-55.8844	-56.1281	-62.2938	-63.1406	-63.9844	-58.55	-57.25	-63.8063	-59.4188	-58.0594	-65.2188	-65.0938	-62.0094	-62.2812	-61.3937	-61.475
		0.36	3.96	-55.8688	-56.2031	-62.35	-63.1344	-64.0125	-58.5906	-57.2656	-63.8	-59.4844	-58.0375	-65.3094	-65.0687	-62.0531	-62.2812	-61.4781	-61.4938
		0.36	3.98	-55.9375	-56.2406	-62.3844	-63.1781	-63.9844	-58.6219	-57.4094	-63.8594	-59.5219	-58.0969	-65.3625	-65.1406	-62.175	-62.2812	-61.45	-61.525
		0.36	4	-56.0406	-56.2406	-62.4844	-63.275	-64.05	-58.6906	-57.3969	-63.9594	-59.5187	-58.15	-65.4156	-65.2625	-62.1688	-62.4	-61.5	-61.6
		0.36	4.02	-56.0281	-56.3781	-62.4688	-63.3	-64.1469	-58.7219	-57.4219	-64	-59.5844	-58.1875	-65.4313	-65.2688	-62.1969	-62.4313	-61.5563	-61.7
		0.36	4.04	-56.1125	-56.3969	-62.5062	-63.2844	-64.1375	-58.8406	-57.4969	-64.0656	-59.6	-58.2906	-65.5437	-65.3125	-62.2719	-62.4313	-61.6094	-61.6781
		0.36	4.06	-56.2	-56.35	-62.5531	-63.3469	-64.1531	-58.825	-57.5719	-64.1312	-59.5719	-58.3812	-65.5375	-65.3906	-62.3469	-62.5125	-61.6656	-61.7531
		0.36	4.08	-56.1937	-56.4562	-62.5531	-63.3375	-64.2562	-58.8	-57.5594	-64.2094	-59.625	-58.3937	-65.5687	-65.45	-62.3187	-62.55	-61.75	-61.7969
		0.36	4.1	-56.2344	-56.4656	-62.6437	-63.3656	-64.35	-58.875	-57.5656	-64.2125	-59.7281	-58.4437	-65.625	-65.4375	-62.3906	-62.4844	-61.825	-61.8375
		0.36	4.12	-56.35	-56.5094	-62.725	-63.6	-64.325	-58.8531	-57.7	-64.2625	-59.7	-58.5187	-65.6875	-65.5125	-62.45	-62.55	-61.825	-61.85
		0.36	4.14	-56.4313	-56.5969	-62.7188	-63.5656	-64.3625	-58.8906	-57.6969	-64.3812	-59.7	-58.5344	-65.7063	-65.6156	-62.4469	-62.6188	-61.8688	-61.9344
		0.36	4.16	-56.4313	-56.5938	-62.8094	-63.6125	-64.4688	-58.9062	-57.6437	-64.3875	-59.7812	-58.55	-65.6906	-65.5969	-62.45	-62.5969	-61.9688	-61.925
		0.36	4.18	-56.4813	-56.6594	-62.8469	-63.6406	-64.5312	-58.9625	-57.725	-64.3438	-59.8094	-58.6094	-65.7875	-65.6	-62.5281	-62.6219	-62.0187	-61.9875
		0.36	4.2	-56.5187	-56.7562	-62.8219	-63.6719	-64.5125	-58.9437	-57.7812	-64.45	-59.8125	-58.6813	-65.8938	-65.7	-62.6063	-62.7156	-62.0062	-62.0594
		0.36	4.22	-56.5187	-56.7656	-62.9406	-63.7062	-64.5875	-58.9562	-57.8	-64.5469	-59.8	-58.6875	-65.875	-65.7344	-62.55	-62.7594	-62.0781	-62.0875
		0.36	4.24	-56.5281	-56.8	-63	-63.7313	-64.6719	-59.0625	-57.8094	-64.4906	-59.8781	-58.7156	-65.9	-65.8063	-62.5875	-62.7781	-62.15	-62.1344
		0.36	4.26	-56.6094	-56.9	-62.9844	-63.8594	-64.6188	-59.075	-57.875	-64.5375	-59.875	-58.7719	-66.0281	-65.9094	-62.6719	-62.8906	-62.2125	-62.2219
		0.36	4.28	-56.6219	-56.8563	-63.125	-63.8688	-64.6031	-59.0438	-57.95	-64.65	-59.85	-58.8375	-66.0437	-65.9437	-62.65	-62.9375	-62.1437	-62.2031
		0.36	4.3	-56.6219	-56.8844	-63.1719	-63.8125	-64.7469	-59.0938	-57.9562	-64.725	-59.9031	-58.8812	-65.9688	-65.8812	-62.6594	-62.8937	-62.2	-62.225
		0.36	4.32	-56.725	-56.95	-63.1625	-63.9031	-64.8	-59.15	-57.9437	-64.7094	-59.9938	-58.9656	-66.0062	-65.9656	-62.7469	-62.95	-62.2375	-62.2812
		0.36	4.34	-56.7812	-56.9688	-63.2531	-63.9469	-64.7906	-59.0594	-58.0031	-64.75	-59.9906	-59.0187	-66.1125	-66.0531	-62.7844	-63.0312	-62.2687	-62.325
		0.36	4.36	-56.8	-57.0187	-63.3	-63.9531	-64.8438	-59.1	-58.025	-64.8313	-60	-59.0031	-66.0625	-66.0062	-62.7188	-63.0156	-62.3375	-62.3187
		0.36	4.38	-56.8594	-57.0938	-63.3125	-64.0469	-64.95	-59.2031	-57.9781	-64.7594	-60.0312	-59	-66.0813	-66.0344	-62.8	-63.0375	-62.4188	-62.4656
		0.36	4.4	-56.9313	-57.0812	-63.4156	-64.1156	-64.9469	-59.2062	-58.0344	-64.7719	-60.0781	-59.1219	-66.1188	-66.1406	-62.9062	-63.0594	-62.3906	-62.4656
		0.36	4.42	-56.9	-57.1594	-63.425	-64.0312	-64.8844	-59.2313	-58.1063	-64.8781	-60.05	-59.1594	-66.2219	-66.1875	-62.9188	-63.0812	-62.3812	-62.4719
		0.36	4.44	-56.95	-57.1188	-63.4813	-64.0437	-65.05	-59.3125	-58.1125	-64.9375	-60.0781	-59.1531	-66.2625	-66.1625	-62.95	-63.0375	-62.4594	-62.525
		0.36	4.46	-57.05	-57.1125	-63.5563	-64.1813	-65.0781	-59.3125	-58.1375	-64.9	-60.1312	-59.2094	-66.2531	-66.2531	-63.0125	-63.15	-62.6156	-62.55
		0.36	4.48	-57.0187	-57.2062	-63.5406	-64.1813	-65.075	-59.2562	-58.1719	-64.9719	-60.1312	-59.2156	-66.3594	-66.3562	-63.0094	-63.225	-62.6125	-62.5062
		0.36	4.5	-57.0594	-57.2062	-63.6	-64.25	-65.0844	-59.2781	-58.2062	-65.0469	-60.1469	-59.2219	-66.35	-66.3625	-62.9781	-63.2125	-62.6281	-62.575
		0.36	4.52	-57.1031	-57.2219	-63.6156	-64.3219	-65.1375	-59.3	-58.1937	-65.0719	-60.175	-59.2594	-66.3156	-66.4062	-63.0281	-63.1469	-62.675	-62.65
		0.36	4.54	-57.1531	-57.275	-63.6188	-64.35	-65.1875	-59.3094	-58.2375	-65.1	-60.1813	-59.35	-66.4	-66.4688	-63.0906	-63.2406	-62.7219	-62.7
		0.36	4.56	-57.0938	-57.3	-63.7062	-64.3375	-65.1531	-59.3	-58.3187	-65.0969	-60.2344	-59.3625	-66.4781	-66.5156	-63.1219	-63.2781	-62.7	-62.7969
		0.36	4.58	-57.1625	-57.3063	-63.7594	-64.4469	-65.1969	-59.3719	-58.325	-65.1594	-60.2313	-59.4062	-66.5188	-66.5469	-63.0844	-63.2281	-62.75	-62.7469
		0.36	4.6	-57.2062	-57.3187	-63.7375	-64.4719	-65.2656	-59.3906	-58.3	-65.1375	-60.2344	-59.5375	-66.5188	-66.625	-63.175	-63.2812	-62.8344	-62.7313
		0.36	4.62	-57.225	-57.3625	-63.8344	-64.4437	-65.2562	-59.3937	-58.3219	-65.1531	-60.325	-59.5094	-66.5813	-66.6438	-63.2062	-63.3125	-62.8594	-62.825
		0.36	4.64	-57.2406	-57.3844	-63.9281	-64.5062	-65.2344	-59.4719	-58.3656	-65.2625	-60.3031	-59.525	-66.6469	-66.6562	-63.2	-63.2938	-62.875	-62.8469
		0.36	4.66	-57.3312	-57.425	-63.9	-64.5625	-65.3344	-59.5156	-58.3875	-65.3031	-60.2938	-59.5906	-66.6281	-66.65	-63.2469	-63.2906	-62.8594	-62.8219
		0.36	4.68	-57.3531	-57.45	-63.9719	-64.5594	-65.375	-59.4906	-58.4188	-65.3	-60.3844	-59.6406	-66.6281	-66.7	-63.3594	-63.4125	-62.9562	-62.8844
		0.36	4.7	-57.2969	-57.4406	-64.0406	-64.6	-65.3625	-59.4656	-58.5	-65.4	-60.4188	-59.5656	-66.7031	-66.7344	-63.3344	-63.4375	-62.95	-62.9
		0.36	4.72	-57.3719	-57.5062	-64	-64.6531	-65.3562	-59.55	-58.5625	-65.5031	-60.3625	-59.6188	-66.6937	-66.7531	-63.3187	-63.4625	-62.9437	-62.95
		0.36	4.74	-57.45	-57.5219	-64.0656	-64.7156	-65.4313	-59.5344	-58.5344	-65.4938	-60.3937	-59.6875	-66.7	-66.8313	-63.3719	-63.5031	-62.9969	-63.0281
		0.36	4.76	-57.4344	-57.4875	-64.1	-64.6969	-65.475	-59.5812	-58.5312	-65.5281	-60.4375	-59.7156	-66.7844	-66.85	-63.4	-63.5344	-63.0563	-62.975
		0.36	4.78	-57.4	-57.5656	-64.0625	-64.7781	-65.5125	-59.6375	-58.5781	-65.6	-60.4375	-59.7219	-66.8875	-66.9	-63.3563	-63.5219	-63.0375	-63.0219
		0.36	4.8	-57.5219	-57.6	-64.15	-64.8281	-65.55	-59.6406	-58.5375	-65.6188	-60.4531	-59.8	-66.8844	-66.95	-63.4406	-63.5625	-63.0406	-63.0594
		0.36	4.82	-57.5625	-57.575	-64.1531	-64.8375	-65.625	-59.5438	-58.5125	-65.6219	-60.5	-59.8375	-66.8438	-67	-63.5375	-63.6406	-63.1	-63.05
		0.36	4.84	-57.5125	-57.675	-64.1875	-64.9062	-65.6531	-59.625	-58.6	-65.6438	-60.5812	-59.8219	-66.95	-66.9656	-63.5156	-63.6344	-63.1531	-63.0781
		0.36	4.86	-57.5563	-57.6906	-64.3187	-64.9688	-65.725	-59.6406	-58.5906	-65.6969	-60.5687	-59.8563	-67.0625	-67.0344	-63.5	-63.6813	-63.1312	-63.1281
		0.36	4.88	-57.6	-57.7281	-64.3219	-64.9375	-65.7594	-59.6	-58.6094	-65.7188	-60.5344	-59.95	-67.0625	-67.075	-63.55	-63.6875	-63.1594	-63.0969
		0.36	4.9	-57.5625	-57.7969	-64.325	-64.9656	-65.8031	-59.6094	-58.6156	-65.6719	-60.6375	-59.9031	-67.0531	-67.0781	-63.5844	-63.6969	-63.2562	-63.1656
		0.36	4.92	-57.6	-57.7719	-64.3406	-65.0156	-65.7281	-59.6813	-58.6781	-65.7094	-60.6344	-59.9125	-67.0938	-67.05	-63.5469	-63.6375	-63.2719	-63.1594
		0.36	4.94	-57.6656	-57.7656	-64.35	-65.0188	-65.7406	-59.6875	-58.6375	-65.7625	-60.5687	-60.0187	-67.1344	-67.1406	-63.5625	-63.6594	-63.2406	-63.1719
		0.36	4.96	-57.6625	-57.7625	-64.4062	-65.0312	-65.8063	-59.6594	-58.6813	-65.8313	-60.6094	-59.9969	-67.1031	-67.1937	-63.6719	-63.675	-63.2719	-63.2344
		0.36	4.98	-57.625	-57.8344	-64.5563	-65.1687	-65.7219	-59.7156	-58.775	-65.8625	-60.6156	-59.9656	-67.15	-67.2	-63.6969	-63.6437	-63.3906	-63.25
		0.46	0	-60.5594	-61.1719	-60.8906	-60.1	-62.1094	-62.3625	-62.0531	-61.8187	-64.2125	-63.0062	-63.7031	-63.7687	-66.525	-66.8063	-66.9688	-67.3469
		0.46	0.02	-60.6281	-61.2188	-60.825	-60.075	-62.0531	-62.4156	-62.1188	-61.7969	-64.2438	-63.0719	-63.725	-63.7625	-66.5125	-66.7844	-66.9875	-67.2937
		0.46	0.04	-60.5969	-61.2094	-60.8531	-60.1406	-62.0656	-62.3875	-62.15	-61.75	-64.3469	-63.1281	-63.7344	-63.8531	-66.5437	-66.7375	-66.9781	-67.2906
		0.46	0.06	-60.5438	-61.1656	-60.9	-60.1719	-62.1094	-62.35	-62.0938	-61.8781	-64.2	-63.1156	-63.725	-63.7781	-66.5406	-66.8281	-67.025	-67.3469
		0.46	0.08	-60.6094	-61.1469	-60.8812	-60.1063	-62.0625	-62.4	-62.0781	-61.8719	-64.2219	-63.1281	-63.7406	-63.8	-66.525	-66.8219	-67.0125	-67.2937
		0.46	0.1	-60.6437	-61.1719	-60.825	-60.1406	-62.0844	-62.4375	-62.1	-61.8125	-64.2188	-63.15	-63.6688	-63.8312	-66.5312	-66.725	-66.9062	-67.3
		0.46	0.12	-60.6	-61.1875	-60.8875	-60.1844	-62.1	-62.3781	-62.0969	-61.8312	-64.1344	-63.1	-63.7125	-63.8094	-66.5563	-66.75	-66.8969	-67.2969
		0.46	0.14	-60.5969	-61.15	-60.8781	-60.1094	-62.0719	-62.3375	-62.0563	-61.8719	-64.1719	-63.1	-63.7812	-63.8	-66.525	-66.7469	-66.925	-67.3531
		0.46	0.16	-60.6469	-61.1531	-60.8563	-60.1219	-62.0656	-62.375	-62.0875	-61.8281	-64.2281	-63.1781	-63.6969	-63.8438	-66.5156	-66.7375	-66.8875	-67.2812
		0.46	0.18	-60.5531	-61.1813	-60.9531	-60.175	-62.1375	-62.3375	-62.1188	-61.8594	-64.25	-63.1437	-63.7	-63.7687	-66.5437	-66.775	-66.8438	-67.2875
		0.46	0.2	-60.575	-61.2281	-60.8969	-60.1125	-62.1	-62.3219	-62.0719	-61.9125	-64.1781	-63.15	-63.7781	-63.8125	-66.4781	-66.8406	-66.9187	-67.3313
		0.46	0.22	-60.6312	-61.1656	-60.8906	-60.0687	-62.0531	-62.4	-62.0875	-61.85	-64.2469	-63.1	-63.725	-63.8688	-66.5094	-66.8031	-66.9625	-67.3344
		0.46	0.24	-60.6	-61.175	-60.9156	-60.1594	-62.1562	-62.3781	-62.1437	-61.8563	-64.2562	-63.1375	-63.7906	-63.7875	-66.5781	-66.7094	-66.9344	-67.2625
		0.46	0.26	-60.5781	-61.1937	-60.8594	-60.1344	-62.15	-62.375	-62.1656	-61.8875	-64.1844	-63.0812	-63.8	-63.7844	-66.5062	-66.7937	-66.9656	-67.3125
		0.46	0.28	-60.6219	-61.2	-60.8844	-60.0969	-62.05	-62.4156	-62.1094	-61.8625	-64.25	-63.05	-63.725	-63.825	-66.5219	-66.7812	-67.0031	-67.35
		0.46	0.3	-60.6	-61.1562	-60.9156	-60.0875	-62.1	-62.4437	-62.1375	-61.85	-64.2688	-63.0594	-63.7844	-63.7625	-66.5406	-66.7	-66.975	-67.3
		0.46	0.32	-60.4969	-61.1781	-60.8812	-60.275	-62.1	-62.4	-62.1594	-61.8812	-64.2063	-63.1	-63.7531	-63.8438	-66.475	-66.7625	-66.95	-67.2937
		0.46	0.34	-60.6	-61.1937	-60.9156	-60.1594	-62.0531	-62.425	-62.0938	-61.8969	-64.1813	-63.0312	-63.7625	-63.85	-66.475	-66.8	-66.9688	-67.3
		0.46	0.36	-60.6	-61.1813	-60.9156	-60.1375	-62.0625	-62.4656	-62.0625	-61.825	-64.2281	-63.0687	-63.8125	-63.7969	-66.6031	-66.7063	-66.9844	-67.3969
		0.46	0.38	-60.5406	-61.1813	-60.8812	-60.225	-62.1281	-62.4313	-62.1312	-61.85	-64.1969	-63.1	-63.775	-63.7938	-66.5437	-66.7469	-66.9563	-67.3688
		0.46	0.4	-60.55	-61.2094	-60.825	-60.0812	-62.1031	-62.3937	-62.1281	-61.9156	-64.1656	-63.05	-63.7125	-63.825	-66.5406	-66.8344	-66.9812	-67.3281
		0.46	0.42	-60.5625	-61.2	-60.8812	-60.0875	-62.0781	-62.4188	-62.1094	-61.6906	-64.2562	-63.0812	-63.7625	-63.7594	-66.5969	-66.8406	-67.0094	-67.3125
		0.46	0.44	-60.5312	-61.1813	-60.8812	-60.1312	-62.0875	-62.3531	-62.1625	-61.8781	-64.2906	-63.1	-63.6875	-63.7875	-66.5594	-66.8156	-67.0219	-67.3906
		0.46	0.46	-60.4938	-61.2062	-60.825	-60.1094	-62.125	-62.3187	-62.1906	-61.9219	-64.2562	-63.1063	-63.6937	-63.8219	-66.5188	-66.8313	-67	-67.3344
		0.46	0.48	-60.5187	-61.2625	-60.85	-60.1437	-62.0812	-62.4	-62.1406	-61.8	-64.2562	-63.1094	-63.7344	-63.85	-66.6031	-66.8469	-67.0156	-67.3031
		0.46	0.5	-60.5719	-61.2062	-60.8875	-60.1875	-62.1063	-62.4562	-62.1719	-61.95	-64.25	-63.1594	-63.6875	-63.825	-66.5844	-66.7688	-67.0375	-67.3438
		0.46	0.52	-60.2	-60.825	-60.4625	-59.7781	-61.7594	-62.0875	-61.8	-61.5563	-63.8844	-62.8187	-63.3187	-63.5125	-66.2312	-66.4688	-66.6656	-67.025
		0.46	0.54	-62.6094	-63.25	-62.9406	-62.1937	-64.1156	-64.4625	-64.1125	-63.8594	-66.4594	-65.3187	-65.9031	-65.975	-68.5687	-68.7781	-68.9187	-69.2844
		0.46	0.56	-66.7562	-67.3875	-67.0531	-66.3906	-68.1219	-68.5312	-68.1406	-67.8812	-70.825	-69.6531	-70.2	-70.3375	-72.5	-72.65	-72.875	-73.2219
		0.46	0.58	-67.825	-68.4375	-68.0687	-67.425	-69.3	-69.5375	-69.2	-68.975	-71.95	-70.8938	-71.4219	-71.5906	-73.5875	-73.8	-74.0813	-74.4437
		0.46	0.6	-67.2	-67.8562	-67.5312	-66.8156	-68.775	-68.9969	-68.7	-68.4344	-71.3	-70.2969	-70.7875	-70.8875	-73.2188	-73.3969	-73.55	-73.9719
		0.46	0.62	-66.2469	-66.8719	-66.4719	-65.8063	-67.7156	-68.0437	-67.6687	-67.3688	-70.1937	-69.0437	-69.55	-69.6344	-72.2438	-72.3812	-72.6125	-72.9187
		0.46	0.64	-65.1594	-65.7469	-65.3969	-64.7219	-66.7188	-67.0344	-66.65	-66.4281	-68.9187	-67.85	-68.4125	-68.4437	-71.1062	-71.2719	-71.575	-71.875
		0.46	0.66	-64.1875	-64.7844	-64.4344	-63.7219	-65.8406	-66.0156	-65.7875	-65.4938	-67.825	-66.8187	-67.325	-67.3469	-70.2344	-70.3562	-70.5687	-70.975
		0.46	0.68	-63.4469	-64.0844	-63.7375	-63.0469	-65.0563	-65.3281	-65.0188	-64.7281	-67.0625	-66.0312	-66.4719	-66.5	-69.4313	-69.6687	-69.7656	-70.2094
		0.46	0.7	-62.9062	-63.5781	-63.1375	-62.4844	-64.5	-64.8031	-64.4938	-64.2	-66.4844	-65.3719	-65.85	-66	-68.8281	-69.0062	-69.2344	-69.5625
		0.46	0.72	-62.4125	-63.0781	-62.6562	-62.0375	-64.1062	-64.35	-64.0687	-63.7781	-65.9938	-64.9844	-65.3938	-65.5219	-68.4	-68.5406	-68.85	-69.1781
		0.46	0.74	-62.0563	-62.6937	-62.3812	-61.6688	-63.6813	-63.9844	-63.7469	-63.425	-65.6906	-64.65	-65.0375	-65.1438	-68.0719	-68.2719	-68.5062	-68.8469
		0.46	0.76	-61.8594	-62.4594	-62.1188	-61.4625	-63.4125	-63.7781	-63.4625	-63.1	-65.4594	-64.3313	-64.85	-64.9469	-67.8031	-67.9812	-68.2125	-68.575
		0.46	0.78	-61.7	-62.2906	-61.9219	-61.2719	-63.3094	-63.6156	-63.3375	-62.9688	-65.1937	-64.1687	-64.5781	-64.7656	-67.6156	-67.7719	-68.0125	-68.3219
		0.46	0.8	-61.5125	-62.0844	-61.7812	-61.0719	-63.1094	-63.4281	-63.1969	-62.75	-65.1	-64.1188	-64.4594	-64.5844	-67.5531	-67.675	-67.8531	-68.2438
		0.46	0.82	-61.3937	-61.9281	-61.6156	-61.025	-62.9188	-63.3312	-63.0187	-62.6219	-64.9906	-63.9125	-64.3656	-64.4938	-67.3594	-67.55	-67.6594	-68.1906
		0.46	0.84	-61.2781	-61.8969	-61.475	-60.8656	-62.9	-63.1875	-62.8812	-62.5906	-64.8781	-63.8312	-64.2781	-64.4906	-67.2125	-67.4156	-67.5938	-68.0156
		0.46	0.86	-61.15	-61.7906	-61.4062	-60.7469	-62.7938	-63.025	-62.8375	-62.4938	-64.75	-63.7906	-64.1844	-64.3594	-67.1531	-67.3063	-67.5219	-67.8812
		0.46	0.88	-61.0875	-61.6562	-61.3625	-60.7313	-62.6656	-62.9688	-62.7344	-62.3688	-64.7094	-63.7094	-64.1781	-64.2688	-67.0563	-67.3187	-67.4313	-67.8562
		0.46	0.9	-61.0406	-61.6656	-61.2844	-60.7062	-62.6	-62.9344	-62.6281	-62.3531	-64.675	-63.6125	-64.0469	-64.2875	-66.975	-67.2625	-67.3562	-67.7812
		0.46	0.92	-61.0281	-61.5812	-61.25	-60.6	-62.6469	-62.8594	-62.625	-62.3281	-64.6	-63.55	-64.0375	-64.3438	-66.9906	-67.2	-67.3281	-67.7094
		0.46	0.94	-60.8906	-61.5469	-61.1719	-60.5875	-62.5031	-62.8375	-62.5969	-62.2313	-64.6312	-63.5812	-63.9594	-64.0875	-66.8969	-67.1906	-67.3	-67.6375
		0.46	0.96	-60.9375	-61.5375	-61.0344	-60.5906	-62.45	-62.8375	-62.55	-62.1656	-64.6312	-63.4875	-63.925	-64.0969	-66.825	-67.15	-67.2094	-67.6656
		0.46	0.98	-60.95	-61.5062	-60.9938	-60.5156	-62.4594	-62.7687	-62.5031	-62.2313	-64.5594	-63.4281	-63.9875	-64.1	-66.8844	-67.05	-67.1844	-67.6094
		0.46	1	-60.8406	-61.4344	-60.9875	-60.5187	-62.4719	-62.7094	-62.4656	-62.1312	-64.5344	-63.4688	-63.9875	-63.9469	-66.8438	-66.9781	-67.1656	-67.5219
		0.46	1.02	-60.8594	-61.4969	-60.8812	-60.5781	-62.5	-62.7656	-62.4594	-62.1844	-64.5719	-63.4938	-63.9	-64.0563	-66.8187	-67.05	-67.1969	-67.525
		0.46	1.04	-61.0594	-61.6875	-60.9969	-60.6594	-62.6312	-62.95	-62.6	-62.35	-64.475	-63.4094	-63.8625	-63.9938	-66.8344	-66.9625	-67.175	-67.55
		0.46	1.06	-61.1156	-61.7875	-61.15	-60.8	-62.8563	-63.0563	-62.8844	-62.4875	-64.4437	-63.4	-63.8656	-63.9	-66.825	-66.9563	-67.1844	-67.4969
		0.46	1.08	-61.3438	-61.9938	-61.2938	-61.0219	-62.9437	-63.2469	-63.0625	-62.6469	-64.5188	-63.4437	-63.7687	-63.975	-66.8375	-67.075	-67.275	-67.5156
		0.46	1.1	-61.6281	-62.2938	-61.5406	-61.3063	-63.2188	-63.5312	-63.2188	-62.9188	-64.5156	-63.4562	-63.9	-64	-66.9656	-67.1375	-67.3187	-67.6406
		0.46	1.12	-61.8875	-62.5062	-61.8438	-61.4813	-63.55	-63.8	-63.5187	-63.3	-64.5781	-63.4688	-63.9437	-64.075	-67.1344	-67.1937	-67.4	-67.8063
		0.46	1.14	-62.1469	-62.7687	-62.0875	-61.7969	-63.8812	-64.0719	-63.8156	-63.55	-64.7438	-63.6625	-64.0531	-64.2031	-67.225	-67.3812	-67.6219	-67.9469
		0.46	1.16	-62.4313	-63.1312	-62.375	-62.1906	-64.125	-64.3688	-64.0844	-63.8594	-64.9	-63.8406	-64.3	-64.4094	-67.4344	-67.6656	-67.85	-68.1625
		0.46	1.18	-62.7812	-63.4188	-62.7656	-62.3937	-64.4688	-64.7312	-64.4375	-64.2156	-65.0875	-64	-64.4406	-64.6	-67.7188	-67.8219	-68.0312	-68.4406
		0.46	1.2	-63.05	-63.6312	-63.0312	-62.7188	-64.85	-65.0156	-64.8125	-64.4625	-65.3063	-64.2031	-64.6094	-64.7937	-67.8938	-68.0781	-68.225	-68.6469
		0.46	1.22	-63.3469	-63.9531	-63.2938	-63.0625	-65.1562	-65.3875	-65.1188	-64.8125	-65.5813	-64.5125	-64.9	-65.0781	-68.2094	-68.4094	-68.5781	-68.8906
		0.46	1.24	-63.7344	-64.3625	-63.6219	-63.3969	-65.4313	-65.75	-65.3719	-65.1625	-65.7094	-64.75	-65.2031	-65.2625	-68.5344	-68.6844	-68.8562	-69.2188
		0.46	1.26	-64.0531	-64.6094	-63.9594	-63.6688	-65.7969	-66.0188	-65.7156	-65.4969	-65.9688	-64.9719	-65.4406	-65.5188	-68.7531	-68.9156	-69.0531	-69.5469
		0.46	1.28	-64.2844	-64.925	-64.225	-64.0188	-66.125	-66.3	-66.0844	-65.7656	-66.225	-65.2719	-65.7219	-65.8156	-69.0563	-69.2	-69.4	-69.7875
		0.46	1.3	-64.5531	-65.2281	-64.5281	-64.2937	-66.4125	-66.6281	-66.3719	-66.0875	-66.4125	-65.5531	-65.9469	-66.1	-69.4031	-69.55	-69.7	-70.0469
		0.46	1.32	-64.8406	-65.4594	-64.7562	-64.4719	-66.7125	-66.9031	-66.6062	-66.3875	-66.5594	-65.7875	-66.1	-66.4156	-69.5875	-69.775	-69.9781	-70.3625
		0.46	1.34	-65.0687	-65.725	-64.9406	-64.7875	-66.9594	-67.0844	-66.9719	-66.5844	-66.8187	-66.0094	-66.3125	-66.725	-69.8031	-70.0094	-70.2375	-70.5563
		0.46	1.36	-65.2156	-66.0375	-65.1594	-65.1094	-67.1188	-67.2844	-67.3	-66.7875	-66.975	-66.2375	-66.4	-66.925	-70.0844	-70.2688	-70.5094	-70.8438
		0.46	1.38	-65.3438	-66.2188	-65.3438	-65.2844	-67.2594	-67.5437	-67.4563	-67.0375	-67.0062	-66.3844	-66.5219	-67.1031	-70.2438	-70.3938	-70.75	-71.125
		0.46	1.4	-65.5188	-66.4625	-65.3	-65.4531	-67.4281	-67.6562	-67.675	-67.1813	-67.0938	-66.425	-66.6969	-67.375	-70.35	-70.4812	-70.9375	-71.275
		0.46	1.42	-65.5312	-66.75	-65.375	-65.7156	-67.4906	-67.6781	-67.9688	-67.2812	-67.2	-66.5312	-66.7	-67.5406	-70.5094	-70.6656	-71.1062	-71.3875
		0.46	1.44	-65.5625	-66.9125	-65.5656	-65.8281	-67.4812	-67.75	-68.1094	-67.4156	-67.2125	-66.575	-66.7562	-67.6656	-70.5875	-70.8531	-71.2875	-71.5188
		0.46	1.46	-65.6281	-67.075	-65.4375	-65.9469	-67.5344	-67.7188	-68.175	-67.5	-67.1937	-66.5813	-66.8719	-67.8531	-70.5594	-70.8969	-71.4062	-71.5781
		0.46	1.48	-65.6094	-67.1625	-65.3313	-66.1188	-67.6188	-67.525	-68.2969	-67.4625	-67.1687	-66.5156	-66.9313	-67.9656	-70.5719	-70.9094	-71.4563	-71.625
		0.46	1.5	-65.5531	-67.1438	-65.1625	-66.2719	-67.5156	-67.3656	-68.2844	-67.4031	-67.05	-66.4625	-66.9594	-68.0094	-70.5281	-71.0156	-71.4094	-71.6875
		0.46	1.52	-65.5312	-67.1156	-64.8844	-66.2844	-67.4281	-67.175	-68.1031	-67.3344	-66.85	-66.2875	-66.95	-68.0094	-70.325	-70.9906	-71.3156	-71.5875
		0.46	1.54	-65.4781	-66.975	-64.475	-66.2188	-67.3156	-66.7531	-67.8656	-67.1438	-66.625	-65.9313	-66.8	-67.8719	-70.1062	-70.8875	-70.9875	-71.3844
		0.46	1.56	-65.2438	-66.5687	-63.9469	-66.1813	-67.1	-66.3094	-67.5062	-66.775	-66.3375	-65.5563	-66.5656	-67.6	-69.8844	-70.65	-70.4875	-71.1375
		0.46	1.58	-64.9812	-66.1	-63.3344	-65.8625	-66.6281	-65.8594	-67.0125	-66.4594	-65.8656	-65.0437	-66.2	-67.075	-69.4	-70.275	-69.8187	-70.6625
		0.46	1.6	-64.5469	-65.5344	-62.4	-65.275	-66.1	-65.2063	-66.3375	-65.9125	-65.3094	-64.3156	-65.6438	-66.4625	-68.8156	-69.675	-69	-70.0875
		0.46	1.62	-63.95	-64.775	-61.4	-64.6219	-65.3781	-64.375	-65.6625	-65.125	-64.6562	-63.45	-64.9375	-65.575	-68.0687	-69.0156	-67.9625	-69.5281
		0.46	1.64	-63.225	-63.9875	-60.3063	-63.6813	-64.4719	-63.6	-64.9313	-64.125	-63.7562	-62.4375	-64.025	-64.5656	-67	-68.2812	-66.8469	-68.85
		0.46	1.66	-62.4813	-63.15	-58.9375	-62.5438	-63.4406	-62.7281	-64.1219	-63.05	-62.8094	-61.4469	-62.9188	-63.6125	-65.7719	-67.3875	-65.5875	-68.05
		0.46	1.68	-61.675	-62.25	-57.6406	-61.3406	-62.4656	-61.7	-63.2625	-61.7875	-61.8406	-60.2906	-61.7906	-62.4656	-64.4281	-66.3875	-64.25	-67.3375
		0.46	1.7	-60.7844	-61.3219	-56.3	-60.1375	-61.4344	-60.7687	-62.4281	-60.4906	-60.8125	-59.0563	-60.5781	-61.3	-62.9562	-65.4062	-62.9	-66.45
		0.46	1.72	-59.9	-60.4906	-54.9	-58.8625	-60.3031	-59.8312	-61.4906	-59.2375	-59.7594	-57.9188	-59.3	-60.1031	-61.5781	-64.3719	-61.65	-65.6156
		0.46	1.74	-58.9719	-59.5656	-53.5625	-57.6	-59.3031	-58.8594	-60.6031	-58.05	-58.7656	-56.75	-58.1813	-58.9406	-60.0687	-63.2844	-60.4594	-64.9
		0.46	1.76	-58.0969	-58.7344	-52.2625	-56.5906	-58.3719	-57.9375	-59.7125	-56.8531	-57.8688	-55.4938	-57.1656	-57.6594	-58.75	-62.2875	-59.2781	-64.1125
		0.46	1.78	-57.1875	-57.975	-51.1625	-55.6094	-57.5094	-57.1125	-58.8812	-55.8375	-57.0594	-54.4344	-56.1437	-56.5219	-57.4344	-61.4188	-58.1844	-63.3563
		0.46	1.8	-56.3312	-57.1437	-49.9875	-54.65	-56.7125	-56.2594	-58.0719	-54.9969	-56.3031	-53.4031	-55.2594	-55.4938	-56.25	-60.4875	-57.2125	-62.8125
		0.46	1.82	-55.575	-56.4344	-48.9281	-53.8094	-56.1125	-55.35	-57.3531	-54.1813	-55.6406	-52.4313	-54.525	-54.525	-55.2438	-59.6469	-56.4375	-62.2781
		0.46	1.84	-54.775	-55.7562	-47.7625	-53.1219	-55.5187	-54.5594	-56.7	-53.4125	-54.9938	-51.5906	-53.7094	-53.6437	-54.2656	-58.9437	-55.7	-61.75
		0.46	1.86	-54.1125	-55.1281	-46.0344	-52.4156	-54.9031	-53.8688	-56.1312	-52.7844	-54.2875	-50.8875	-53.15	-52.9562	-53.4	-58.3094	-54.9906	-61.3563
		0.46	1.88	-53.5125	-54.5406	-43.3531	-51.7844	-54.4281	-53.15	-55.5625	-52.1437	-53.75	-50.3187	-52.5594	-52.3312	-52.7625	-57.6781	-54.4281	-60.9437
		0.46	1.9	-52.8906	-54.0281	-39.4969	-51.3094	-54.0687	-52.5344	-55.0906	-51.5094	-53.1969	-49.7156	-52.0031	-51.7969	-52.1219	-57.1625	-54.0062	-60.5625
		0.46	1.92	-52.3187	-53.4469	-34.1281	-50.9094	-53.6312	-51.9938	-54.6969	-50.9469	-52.6469	-49.2438	-51.6188	-51.3312	-51.5812	-56.7625	-53.5094	-60.3406
		0.46	1.94	-51.8344	-53.0563	-26.7406	-50.3719	-53.2281	-51.4813	-54.3312	-50.3969	-52.2062	-48.8531	-51.2531	-50.9656	-51.1094	-56.3937	-53.125	-60.05
		0.46	1.96	-51.3812	-52.6813	-17.6938	-49.9844	-52.9906	-50.975	-53.9656	-49.8438	-51.9062	-48.2281	-50.9156	-50.6437	-50.5844	-56.0094	-52.7844	-59.8156
		0.46	1.98	-50.9	-52.3	-8.23125	-49.7125	-52.75	-50.5906	-53.6437	-49.3281	-51.5094	-46.9406	-50.6688	-50.35	-49.6	-55.7313	-52.425	-59.6813
		0.46	2	-50.4656	-52.0125	0.28125	-49.3625	-52.4406	-50.2188	-53.4031	-48.8187	-51.15	-44.5875	-50.4219	-50.175	-47.8	-55.5938	-52.025	-59.5031
		0.46	2.02	-50.1906	-51.725	6.50313	-49.0187	-52.1937	-49.8344	-53.1344	-48	-50.9062	-41.025	-50.075	-49.9313	-44.8438	-55.4156	-51.7656	-59.3781
		0.46	2.04	-49.9	-51.4531	9.79375	-48.7906	-52.025	-49.4875	-52.8531	-46.4562	-50.7938	-35.975	-49.975	-49.7	-40.5938	-55.2313	-51.5281	-59.4
		0.46	2.06	-49.625	-51.3719	10.0969	-48.5687	-51.8438	-49.2812	-52.6063	-43.8781	-50.5187	-29.0438	-49.8594	-49.5812	-35.0656	-55.1813	-51.2	-59.2875
		0.46	2.08	-49.3625	-51.1906	7.74062	-48.2219	-51.6063	-48.9781	-52.3844	-40.1219	-50.3375	-19.9844	-49.6375	-49.375	-27.6031	-55.1437	-50.9094	-59.2375
		0.46	2.1	-49.1969	-51.0375	3.26875	-47.8438	-51.4969	-48.55	-52.15	-34.9	-50.1969	-9.71875	-49.5375	-49.1625	-18.2469	-55.0875	-50.6562	-59.25
		0.46	2.12	-48.9094	-50.9562	-2.53437	-47.2125	-51.4062	-47.7844	-51.9	-27.725	-50.0156	0.065625	-49.4437	-48.9813	-8.64375	-55.0438	-50.1937	-59.1781
		0.46	2.14	-48.6937	-50.8625	-9.07812	-45.6875	-51.2	-46.1906	-51.7844	-18.8125	-49.875	7.82188	-49.2594	-48.6375	-0.2125	-55.1063	-49.0844	-59.2313
		0.46	2.16	-48.4844	-50.7812	-16.1031	-43.0469	-51.1	-43.3875	-51.65	-9.375	-49.7656	12.4344	-49.1719	-47.6437	6.1	-55.1094	-47.0438	-59.2656
		0.46	2.18	-48.3625	-50.725	-22.8781	-39.3219	-51.0187	-39.4437	-51.5281	-0.790625	-49.6937	13.6313	-49.1469	-45.625	9.47812	-55.0906	-43.8844	-59.1906
		0.46	2.2	-48.0375	-50.575	-29.1469	-34.4188	-50.9125	-34.0812	-51.3812	5.59375	-49.4875	11.5625	-49.025	-42.3375	9.7	-55.1406	-39.4156	-59.2188
		0.46	2.22	-47.6969	-50.4719	-34.7938	-27.575	-50.7469	-26.7406	-51.35	9.10625	-49.4219	6.9	-48.95	-37.6625	7.29688	-55.2438	-33.5781	-59.2781
		0.46	2.24	-47.1	-50.4313	-39.7625	-18.8875	-50.6344	-17.6594	-51.2406	9.6125	-49.3781	0.540625	-48.9344	-31.5469	2.9	-55.2844	-25.8563	-59.2687
		0.46	2.26	-45.6844	-50.3406	-43.8438	-9.58438	-50.5938	-8.33125	-51.1625	7.44375	-49.2969	-6.86875	-48.7625	-23.3312	-3.06562	-55.3469	-16.5406	-59.3563
		0.46	2.28	-43.0719	-50.25	-47.2156	-0.984375	-50.4813	-0.00625	-51.075	3.15	-49.1406	-14.7	-48.6656	-13.3	-9.89688	-55.4156	-7.15312	-59.3844
		0.46	2.3	-39.4344	-50.2438	-50.125	5.7625	-50.3656	6.18125	-51.1219	-2.55	-49.1188	-22.4438	-48.65	-3.14375	-17.0938	-55.5156	0.925	-59.3688
		0.46	2.32	-34.4688	-50.1688	-52.4625	9.69375	-50.35	9.5125	-51.15	-9.10312	-49.0062	-29.5406	-48.4531	5.35	-24.1719	-55.5187	6.71875	-59.4469
		0.46	2.34	-27.65	-50.1156	-54.3312	10.6219	-50.25	9.75	-51.0969	-16.0719	-48.85	-35.8438	-48.2094	11.1187	-30.7969	-55.5531	9.7	-59.4625
		0.46	2.36	-19.0688	-50.0781	-55.85	8.86875	-50.1469	7.44375	-51.1312	-22.9594	-48.8375	-41.2344	-47.5312	13.6156	-36.6	-55.675	9.6	-59.5
		0.46	2.38	-9.86563	-49.9813	-57.1312	4.95	-50.1094	3.0875	-51.1937	-29.25	-48.8219	-45.8094	-45.8344	12.625	-41.6656	-55.6906	6.81563	-59.6188
		0.46	2.4	-1.32187	-49.9906	-58.0156	-0.5125	-50.1031	-2.7125	-51.1969	-34.8375	-48.75	-49.5656	-42.9938	8.84062	-46.0656	-55.7094	2.1125	-59.6625
		0.46	2.42	5.41563	-49.9844	-58.7719	-7.00938	-50.0469	-9.33438	-51.2	-39.6906	-48.6312	-52.5438	-38.9688	3.07188	-49.7	-55.8344	-4.07812	-59.7188
		0.46	2.44	9.46875	-49.9813	-59.4437	-13.95	-49.9844	-16.2094	-51.2	-43.8594	-48.6969	-54.9688	-33.3688	-4.04688	-52.6281	-55.9062	-11.0906	-59.8187
		0.46	2.46	10.4594	-49.9938	-59.85	-20.9156	-50.0219	-22.975	-51.3469	-47.3438	-48.7188	-56.9375	-25.9219	-11.8719	-55.1437	-55.9281	-18.275	-59.8219
		0.46	2.48	8.7875	-49.9844	-60.1844	-27.4438	-50.1031	-29.3937	-51.4344	-50.2	-48.7	-58.4406	-16.5031	-19.7281	-57.1688	-56.0438	-25.3406	-59.9344
		0.46	2.5	5.0125	-49.9562	-60.4719	-33.2656	-50.1188	-35.0281	-51.4469	-52.6219	-48.7438	-59.6063	-6.4125	-27.0875	-58.7406	-56.1875	-31.8469	-60.0125
		0.46	2.52	-0.459375	-50	-60.6437	-38.3156	-50.1625	-39.8719	-51.55	-54.525	-48.8563	-60.5	2.7	-33.7031	-60.05	-56.275	-37.5469	-60.05
		0.46	2.54	-6.89062	-50.0625	-60.7	-42.7344	-50.275	-44.0375	-51.6906	-56	-48.9375	-61.25	9.38437	-39.5	-61.1594	-56.3219	-42.4938	-60.15
		0.46	2.56	-13.7188	-50.1	-60.825	-46.4313	-50.3844	-47.55	-51.6469	-57.3625	-49.0281	-61.7687	12.9688	-44.2875	-61.9375	-56.3937	-46.7344	-60.2531
		0.46	2.58	-20.5844	-50.2156	-60.8594	-49.3344	-50.4094	-50.3656	-51.6875	-58.3	-49.2344	-62.1063	13.1656	-48.2594	-62.6	-56.5187	-50.175	-60.3094
		0.46	2.6	-27.1281	-50.2719	-60.8219	-51.8469	-50.5	-52.6562	-51.8125	-59.0438	-49.45	-62.4531	10.2375	-51.5438	-63.1375	-56.6094	-53.0844	-60.4281
		0.46	2.62	-32.8937	-50.3	-60.8906	-53.9344	-50.5719	-54.6031	-51.9469	-59.6719	-49.5938	-62.7438	5.05312	-54.1063	-63.5	-56.6531	-55.5	-60.475
		0.46	2.64	-37.925	-50.4	-60.9938	-55.5438	-50.6375	-56.1437	-51.9719	-60.175	-49.825	-62.8406	-1.60938	-56.1375	-63.8125	-56.8094	-57.4125	-60.5844
		0.46	2.66	-42.3156	-50.4062	-60.9437	-56.8	-50.7188	-57.3625	-52.0563	-60.4969	-50.0594	-62.8969	-9.19063	-57.8438	-64.1031	-56.9469	-58.9844	-60.6844
		0.46	2.68	-46	-50.4437	-60.9156	-57.8469	-50.8375	-58.3406	-52.1344	-60.7281	-50.2594	-62.975	-17.075	-59.1906	-64.25	-57.0625	-60.3094	-60.7844
		0.46	2.7	-49.0687	-50.55	-60.9281	-58.7344	-50.9969	-59.1781	-52.2906	-60.9531	-50.35	-63.0187	-24.5938	-60.1562	-64.3375	-57.2	-61.2938	-60.8219
		0.46	2.72	-51.4875	-50.65	-60.8844	-59.3281	-51.05	-59.7219	-52.3937	-61.1437	-50.5719	-62.9344	-31.5125	-60.9188	-64.4688	-57.3344	-62.1125	-61
		0.46	2.74	-53.5656	-50.7156	-60.8219	-59.8219	-51.1844	-60.1562	-52.4688	-61.2094	-50.775	-62.9469	-37.6531	-61.5687	-64.55	-57.4813	-62.775	-61.05
		0.46	2.76	-55.2875	-50.8438	-60.7562	-60.25	-51.3125	-60.6156	-52.6312	-61.275	-50.9	-62.975	-42.6844	-62.05	-64.5719	-57.5344	-63.2938	-61.1312
		0.46	2.78	-56.5938	-50.8906	-60.7938	-60.5594	-51.3906	-60.8563	-52.6844	-61.3812	-51.05	-62.9469	-47	-62.35	-64.6094	-57.6656	-63.7188	-61.2062
		0.46	2.8	-57.6344	-50.9625	-60.7281	-60.7156	-51.4719	-61.0469	-52.7438	-61.3531	-51.3	-62.9	-50.5125	-62.6281	-64.75	-57.8312	-64.0781	-61.2313
		0.46	2.82	-58.5344	-51.1156	-60.7531	-60.8875	-51.675	-61.1969	-52.8719	-61.3781	-51.4813	-62.8969	-53.2687	-62.8281	-64.6937	-57.8969	-64.2344	-61.2562
		0.46	2.84	-59.1625	-51.2	-60.7656	-61.0781	-51.7625	-61.3469	-53.0062	-61.4469	-51.6375	-62.9281	-55.4156	-62.8875	-64.6687	-57.9219	-64.3781	-61.4156
		0.46	2.86	-59.65	-51.2469	-60.7406	-61.1312	-51.8375	-61.45	-53.075	-61.4281	-51.7969	-62.8812	-57.2281	-63.0344	-64.7562	-58.0531	-64.5563	-61.4781
		0.46	2.88	-60.0438	-51.4094	-60.7094	-61.1219	-51.8875	-61.4406	-53.1969	-61.3063	-52.0531	-62.8312	-58.6031	-63.0938	-64.7469	-58.2188	-64.6	-61.4813
		0.46	2.9	-60.3937	-51.5156	-60.775	-61.1562	-52.0125	-61.5125	-53.3063	-61.3625	-52.2062	-62.85	-59.6813	-63.0969	-64.7438	-58.3	-64.7469	-61.6781
		0.46	2.92	-60.7	-51.5938	-60.8281	-61.2188	-52.1719	-61.5438	-53.4062	-61.4125	-52.3187	-62.8063	-60.5281	-63.1375	-64.7812	-58.3594	-64.8313	-61.7125
		0.46	2.94	-60.7687	-51.7094	-60.775	-61.1219	-52.225	-61.5625	-53.4125	-61.375	-52.5281	-62.7625	-61.1781	-63.2	-64.7594	-58.5062	-64.8313	-61.7906
		0.46	2.96	-60.8875	-51.7844	-60.7469	-61.1469	-52.3656	-61.4781	-53.5312	-61.3656	-52.7469	-62.7656	-61.6	-63.1437	-64.7188	-58.6594	-64.9344	-61.8781
		0.46	2.98	-61.0156	-51.8531	-60.8	-61.2156	-52.5438	-61.4594	-53.6937	-61.3812	-52.8	-62.8219	-62.0156	-63.1375	-64.7406	-58.7125	-64.9781	-61.8937
		0.46	3	-61.0625	-52.0062	-60.7687	-61.1688	-52.6531	-61.5094	-53.7656	-61.3719	-52.9781	-62.7188	-62.3219	-63.2	-64.8281	-58.7938	-64.9313	-61.9875
		0.46	3.02	-61.0812	-52.1125	-60.7281	-61.125	-52.7062	-61.4719	-53.825	-61.3187	-53.1844	-62.7625	-62.3781	-63.25	-64.7937	-58.9594	-65	-62.0656
		0.46	3.04	-61.075	-52.2281	-60.8094	-61.1188	-52.7938	-61.425	-54.0156	-61.3719	-53.3281	-62.7625	-62.6063	-63.1344	-64.7562	-59.0375	-65	-62.1
		0.46	3.06	-61.1156	-52.3156	-60.8688	-61.1719	-52.9469	-61.4875	-54.0812	-61.4219	-53.3969	-62.7781	-62.9	-63.15	-64.8313	-59.0969	-65.0188	-62.1375
		0.46	3.08	-61.0406	-52.3625	-60.7969	-61.1	-53.0781	-61.4688	-54.1	-61.4156	-53.575	-62.7875	-62.7687	-63.1594	-64.8844	-59.2406	-65.0062	-62.2438
		0.46	3.1	-61.0531	-52.4313	-60.8969	-61.075	-53.125	-61.3875	-54.2812	-61.3656	-53.8063	-62.8406	-62.8656	-63.1063	-64.8719	-59.3781	-64.9781	-62.225
		0.46	3.12	-61.0844	-52.5656	-60.95	-61.1281	-53.2781	-61.4219	-54.3	-61.4719	-53.8344	-62.825	-62.9437	-63.0687	-64.95	-59.4656	-64.9781	-62.3063
		0.46	3.14	-61.0563	-52.5656	-60.9313	-61.1469	-53.3625	-61.4594	-54.3563	-61.5156	-53.9437	-62.85	-62.9031	-63.1594	-64.9625	-59.5	-65.0312	-62.3969
		0.46	3.16	-60.9344	-52.6688	-60.9781	-61.0938	-53.4375	-61.4125	-54.5344	-61.4813	-54.0906	-62.8875	-62.9437	-63.15	-64.9719	-59.6281	-64.9906	-62.4
		0.46	3.18	-60.9625	-52.8469	-61.0375	-61.0906	-53.5469	-61.3563	-54.6625	-61.5281	-54.2781	-62.9125	-62.925	-63.0187	-64.9938	-59.7188	-64.975	-62.4875
		0.46	3.2	-60.9938	-52.9	-61.0625	-61.1437	-53.6813	-61.4469	-54.6813	-61.6094	-54.3469	-62.925	-62.8656	-63.0844	-65.0531	-59.8156	-65.0469	-62.55
		0.46	3.22	-60.9813	-53	-61.0156	-61.125	-53.7719	-61.5062	-54.7875	-61.6437	-54.4719	-62.9875	-62.8156	-63.0812	-65.1	-59.9062	-65.025	-62.5375
		0.46	3.24	-60.9125	-53.1094	-61.0812	-61.125	-53.8031	-61.4594	-54.8688	-61.6562	-54.6781	-63.0062	-62.85	-63.0469	-65.0531	-59.9844	-65.0813	-62.6188
		0.46	3.26	-60.9375	-53.1469	-61.1875	-61.1437	-53.9344	-61.5	-54.8563	-61.7219	-54.6719	-62.9969	-62.8563	-63.1	-65.1438	-60.0969	-65.1125	-62.725
		0.46	3.28	-60.9562	-53.3031	-61.1594	-61.1937	-54.0563	-61.575	-54.9688	-61.8156	-54.7844	-63.0844	-62.75	-63.1562	-65.2312	-60.1594	-65.0844	-62.7875
		0.46	3.3	-60.925	-53.3875	-61.1375	-61.25	-54.0531	-61.6406	-55.0469	-61.7719	-54.9594	-63.1	-62.7469	-63.1406	-65.2	-60.2625	-65.1312	-62.8281
		0.46	3.32	-60.8688	-53.4125	-61.25	-61.2156	-54.175	-61.625	-55.15	-61.8594	-55.0687	-63.1	-62.8125	-63.1656	-65.2688	-60.3688	-65.2	-62.9313
		0.46	3.34	-60.9562	-53.55	-61.3125	-61.2938	-54.3094	-61.6437	-55.2438	-61.9344	-55.1094	-63.2562	-62.7969	-63.2375	-65.3562	-60.4781	-65.1781	-62.9562
		0.46	3.36	-61.0156	-53.6656	-61.275	-61.3625	-54.3937	-61.75	-55.3031	-61.9188	-55.1937	-63.2687	-62.8156	-63.2844	-65.3906	-60.4844	-65.2469	-63
		0.46	3.38	-60.9875	-53.7	-61.3531	-61.3281	-54.4313	-61.775	-55.3063	-61.9344	-55.3719	-63.2844	-62.8375	-63.2812	-65.4062	-60.5719	-65.2875	-63.0656
		0.46	3.4	-60.9594	-53.8187	-61.4531	-61.3969	-54.5406	-61.8094	-55.4062	-62.0375	-55.4531	-63.4219	-62.7781	-63.3469	-65.4875	-60.6562	-65.3344	-63.0938
		0.46	3.42	-61	-53.8875	-61.4875	-61.5	-54.6125	-61.8531	-55.5656	-62.0781	-55.4969	-63.4688	-62.7625	-63.4875	-65.5594	-60.675	-65.3875	-63.1125
		0.46	3.44	-61.0563	-53.875	-61.5094	-61.4969	-54.6969	-61.95	-55.5812	-62.0563	-55.6469	-63.475	-62.8438	-63.4969	-65.5875	-60.7531	-65.4	-63.1813
		0.46	3.46	-61.0375	-54	-61.6	-61.4938	-54.7656	-61.9313	-55.6813	-62.1	-55.75	-63.6219	-62.8563	-63.5094	-65.6312	-60.8469	-65.4031	-63.225
		0.46	3.48	-61.0469	-54.125	-61.675	-61.525	-54.9094	-61.9531	-55.7656	-62.2438	-55.8187	-63.625	-62.8563	-63.5656	-65.7031	-60.9406	-65.5094	-63.2594
		0.46	3.5	-61.125	-54.1094	-61.6781	-61.6125	-54.975	-62.0156	-55.775	-62.2625	-55.85	-63.65	-62.9656	-63.6	-65.75	-60.9437	-65.5031	-63.3875
		0.46	3.52	-61.1	-54.1844	-61.7562	-61.5906	-54.9719	-62.1031	-55.8594	-62.2281	-55.975	-63.75	-62.9656	-63.6	-65.7438	-60.9938	-65.5469	-63.3844
		0.46	3.54	-61.1063	-54.275	-61.8469	-61.6312	-55.0281	-62.125	-55.9062	-62.2969	-56.0719	-63.7562	-62.95	-63.6844	-65.825	-61.1344	-65.5844	-63.4188
		0.46	3.56	-61.1656	-54.2812	-61.8719	-61.6875	-55.1406	-62.1813	-55.9125	-62.3906	-56.1219	-63.7781	-62.975	-63.7562	-65.8313	-61.1844	-65.575	-63.5187
		0.46	3.58	-61.25	-54.3688	-61.8531	-61.7625	-55.225	-62.2	-56.0125	-62.4313	-56.2562	-63.8469	-63.0687	-63.7531	-65.8	-61.1937	-65.5844	-63.5469
		0.46	3.6	-61.3063	-54.4875	-61.9656	-61.7156	-55.2875	-62.2438	-56.0625	-62.5156	-56.45	-63.8781	-63.0344	-63.7938	-65.8812	-61.2969	-65.6656	-63.5844
		0.46	3.62	-61.3094	-54.5	-62.0438	-61.8187	-55.3281	-62.2687	-56.1	-62.5906	-56.475	-63.925	-63.1188	-63.8594	-65.9781	-61.3812	-65.6719	-63.6625
		0.46	3.64	-61.3375	-54.6094	-62.0438	-61.9437	-55.4469	-62.3187	-56.2125	-62.6656	-56.4656	-64	-63.175	-63.9625	-66.0156	-61.4562	-65.75	-63.6594
		0.46	3.66	-61.4375	-54.6688	-62.1125	-61.9437	-55.5281	-62.45	-56.2188	-62.6375	-56.6	-64.0125	-63.15	-63.9188	-66.0687	-61.55	-65.8625	-63.6562
		0.46	3.68	-61.4094	-54.6594	-62.2313	-61.9813	-55.5281	-62.5	-56.2594	-62.65	-56.7156	-64.1156	-63.1625	-64.025	-66.15	-61.6312	-65.85	-63.7125
		0.46	3.7	-61.4	-54.75	-62.2656	-62.0844	-55.65	-62.5062	-56.3719	-62.7594	-56.7656	-64.1469	-63.2531	-64.0938	-66.2219	-61.675	-65.9219	-63.7438
		0.46	3.72	-61.4969	-54.8625	-62.3469	-62.1562	-55.6906	-62.6437	-56.4469	-62.8219	-56.8	-64.2125	-63.3094	-64.0875	-66.2094	-61.7031	-66.0125	-63.7719
		0.46	3.74	-61.525	-54.8156	-62.4406	-62.1719	-55.7531	-62.7062	-56.5125	-62.7875	-56.925	-64.2969	-63.3812	-64.1156	-66.2625	-61.8	-66	-63.8375
		0.46	3.76	-61.5625	-54.95	-62.5344	-62.2562	-55.8312	-62.7562	-56.6219	-62.85	-57.0375	-64.2969	-63.4594	-64.2406	-66.3406	-61.9313	-66.0781	-63.875
		0.46	3.78	-61.625	-55.0312	-62.4813	-62.3594	-55.9	-62.7656	-56.6469	-62.9313	-57.0938	-64.35	-63.5656	-64.2312	-66.3469	-61.8844	-66.1719	-63.8656
		0.46	3.8	-61.7094	-55.0719	-62.4938	-62.35	-55.9469	-62.875	-56.6312	-62.95	-57.1375	-64.4219	-63.5344	-64.2188	-66.3938	-61.8781	-66.175	-63.9313
		0.46	3.82	-61.6875	-55.1	-62.5812	-62.3937	-56.0031	-62.9844	-56.7156	-62.9813	-57.2438	-64.475	-63.625	-64.3469	-66.4625	-62	-66.2156	-63.9906
		0.46	3.84	-61.725	-55.1562	-62.6219	-62.4469	-56.0906	-62.9531	-56.7344	-63.0469	-57.3125	-64.5094	-63.675	-64.4406	-66.4719	-62.0563	-66.2875	-63.9906
		0.46	3.86	-61.8375	-55.1312	-62.6312	-62.5594	-56.2	-63.0156	-56.7219	-63.0875	-57.3563	-64.5719	-63.6844	-64.3719	-66.4594	-62.0469	-66.3	-64.0469
		0.46	3.88	-61.8594	-55.2281	-62.725	-62.5906	-56.2156	-63.1	-56.7781	-63.1344	-57.4062	-64.6687	-63.7469	-64.4531	-66.5687	-62.15	-66.375	-64.1062
		0.46	3.9	-61.8563	-55.3438	-62.7562	-62.6375	-56.3094	-63.1437	-56.7875	-63.2094	-57.4813	-64.6906	-63.7906	-64.5406	-66.6562	-62.2625	-66.425	-64.1375
		0.46	3.92	-61.95	-55.3469	-62.7812	-62.7625	-56.375	-63.1875	-56.8812	-63.3375	-57.5219	-64.75	-63.775	-64.5813	-66.7	-62.2125	-66.4125	-64.1844
		0.46	3.94	-62.0438	-55.3781	-62.8375	-62.7969	-56.3812	-63.275	-56.9594	-63.35	-57.5344	-64.825	-63.8438	-64.5344	-66.6719	-62.2875	-66.5094	-64.2312
		0.46	3.96	-62	-55.4625	-62.9125	-62.8063	-56.3969	-63.3438	-56.95	-63.3	-57.6531	-64.8656	-63.925	-64.65	-66.7937	-62.3812	-66.5687	-64.1594
		0.46	3.98	-62.0687	-55.5594	-62.95	-62.8719	-56.5344	-63.3469	-57.0312	-63.4031	-57.7313	-64.9313	-63.9719	-64.6813	-66.875	-62.4188	-66.5813	-64.2688
		0.46	4	-62.1406	-55.5875	-62.9375	-63.0062	-56.6281	-63.3531	-57.1219	-63.5062	-57.8156	-64.9437	-63.9875	-64.7031	-66.85	-62.4	-66.6594	-64.3
		0.46	4.02	-62.175	-55.6594	-63.0062	-63.0594	-56.5938	-63.475	-57.0938	-63.525	-57.8406	-65.0406	-64.0563	-64.7562	-66.8625	-62.45	-66.7156	-64.3469
		0.46	4.04	-62.1781	-55.6781	-63.1094	-63.05	-56.6813	-63.5781	-57.2156	-63.5375	-57.9437	-65.1469	-64.0875	-64.85	-66.9656	-62.4938	-66.675	-64.3406
		0.46	4.06	-62.2812	-55.6688	-63.1625	-63.15	-56.7344	-63.5656	-57.2375	-63.625	-58.0031	-65.1469	-64.0938	-64.9031	-66.9781	-62.5375	-66.75	-64.4062
		0.46	4.08	-62.325	-55.7687	-63.1625	-63.2	-56.7062	-63.5563	-57.2438	-63.6875	-57.9781	-65.2562	-64.1813	-64.9	-66.9594	-62.625	-66.8	-64.4125
		0.46	4.1	-62.3469	-55.8438	-63.2188	-63.2594	-56.8063	-63.65	-57.3531	-63.7125	-58.0625	-65.3187	-64.2656	-65.0406	-67.0469	-62.6562	-66.8281	-64.4219
		0.46	4.12	-62.35	-55.8406	-63.2687	-63.3063	-56.8875	-63.7281	-57.3812	-63.7219	-58.1437	-65.35	-64.2812	-65.1344	-67.1281	-62.6375	-66.9031	-64.4781
		0.46	4.14	-62.4313	-55.9406	-63.2531	-63.3688	-56.9469	-63.7562	-57.4156	-63.8094	-58.1625	-65.4313	-64.3281	-65.1188	-67.1406	-62.6625	-66.9844	-64.4656
		0.46	4.16	-62.4594	-55.9906	-63.3594	-63.4188	-56.9813	-63.6969	-57.475	-63.8969	-58.2219	-65.5031	-64.4563	-65.1781	-67.1531	-62.75	-66.9656	-64.5
		0.46	4.18	-62.6031	-55.95	-63.4562	-63.425	-57.0938	-63.7938	-57.4844	-63.9469	-58.3	-65.5094	-64.4125	-65.2688	-67.2594	-62.725	-67.0312	-64.6219
		0.46	4.2	-62.6781	-56	-63.425	-63.4719	-57.1375	-63.8937	-57.5375	-64.0281	-58.4062	-65.5813	-64.45	-65.25	-67.3125	-62.7875	-67.05	-64.6125
		0.46	4.22	-62.65	-56.1031	-63.4594	-63.5812	-57.1312	-63.9156	-57.6281	-64.0625	-58.4219	-65.6188	-64.55	-65.2906	-67.25	-62.9062	-66.9875	-64.6094
		0.46	4.24	-62.7281	-56.1125	-63.5375	-63.5687	-57.2125	-63.9688	-57.6281	-64.1312	-58.4125	-65.5563	-64.5969	-65.325	-67.2875	-62.95	-67.0625	-64.6625
		0.46	4.26	-62.7562	-56.1156	-63.6	-63.625	-57.2281	-64.0906	-57.6875	-64.1687	-58.4781	-65.6844	-64.6562	-65.4094	-67.3688	-62.9313	-67.1312	-64.7375
		0.46	4.28	-62.75	-56.3625	-63.6188	-63.6844	-57.2687	-64.1469	-57.6875	-64.2188	-58.55	-65.7312	-64.6813	-65.4	-67.3719	-63.0094	-67.0938	-64.6813
		0.46	4.3	-62.8312	-56.225	-63.65	-63.8	-57.3406	-64.1562	-57.6312	-64.2156	-58.5687	-65.7094	-64.7406	-65.4094	-67.3969	-63.0344	-67.1594	-64.7031
		0.46	4.32	-62.8312	-56.2	-63.75	-63.8	-57.3563	-64.2	-57.7219	-64.2125	-58.5969	-65.8094	-64.6906	-65.5031	-67.4812	-63.0031	-67.2312	-64.7469
		0.46	4.34	-62.8438	-56.3375	-63.7656	-63.8469	-57.375	-64.3156	-57.8156	-64.2719	-58.6688	-65.8562	-64.8187	-65.5531	-67.4875	-63.0969	-67.2406	-64.7281
		0.46	4.36	-62.9688	-56.2625	-63.7156	-63.9313	-57.5	-64.2969	-57.7969	-64.3625	-58.725	-65.875	-64.8844	-65.5375	-67.5156	-63.1437	-67.2688	-64.7781
		0.46	4.38	-63.0469	-56.3219	-63.8	-63.9969	-57.5375	-64.325	-57.8531	-64.425	-58.7062	-65.975	-64.95	-65.6156	-67.5563	-63.0906	-67.3438	-64.875
		0.46	4.4	-63.05	-56.3688	-63.875	-64.0531	-57.5594	-64.4125	-57.8969	-64.4313	-58.8125	-66.0156	-65.0094	-65.7031	-67.6125	-63.175	-67.2969	-64.825
		0.46	4.42	-63.1312	-56.4	-63.8906	-64.0531	-57.625	-64.4844	-57.8469	-64.4656	-58.9156	-66.0344	-65.025	-65.75	-67.6312	-63.1656	-67.3938	-64.8531
		0.46	4.44	-63.2188	-56.4219	-63.9188	-64.1469	-57.6594	-64.525	-57.9219	-64.5156	-58.9	-66.05	-65.1	-65.7812	-67.5844	-63.1656	-67.5	-64.9313
		0.46	4.46	-63.2	-56.45	-64	-64.2156	-57.6562	-64.5906	-57.9562	-64.5719	-58.9656	-66.0406	-65.0844	-65.9156	-67.675	-63.225	-67.4437	-64.9313
		0.46	4.48	-63.3219	-56.55	-63.9938	-64.2	-57.7531	-64.65	-57.9688	-64.5781	-59.0469	-66.0125	-65.1375	-65.975	-67.7063	-63.2438	-67.5	-64.9313
		0.46	4.5	-63.3438	-56.5219	-63.9781	-64.2594	-57.7938	-64.6344	-58.0625	-64.6531	-59.0563	-66.1031	-65.1687	-65.9969	-67.725	-63.2438	-67.5906	-64.9625
		0.46	4.52	-63.35	-56.5563	-63.9688	-64.3375	-57.7313	-64.6906	-58.05	-64.6625	-58.9594	-66.15	-65.1813	-66.0656	-67.7406	-63.3875	-67.625	-64.9812
		0.46	4.54	-63.45	-56.6813	-64.1094	-64.35	-57.8469	-64.8125	-58.05	-64.7094	-59.1	-66.1594	-65.2125	-66.2	-67.825	-63.3688	-67.6531	-64.9719
		0.46	4.56	-63.4094	-56.6219	-64.1687	-64.3375	-57.9437	-64.7719	-58.125	-64.7188	-59.1375	-66.25	-65.2875	-66.175	-67.8781	-63.375	-67.7	-65.0375
		0.46	4.58	-63.425	-56.7219	-64.1375	-64.45	-57.9344	-64.8094	-58.1281	-64.7844	-59.15	-66.2531	-65.3156	-66.15	-67.8781	-63.3844	-67.6625	-65.1
		0.46	4.6	-63.5094	-56.75	-64.1469	-64.4719	-58.0438	-64.9344	-58.1312	-64.825	-59.1781	-66.3	-65.3063	-66.2	-67.9625	-63.4062	-67.6656	-65.0719
		0.46	4.62	-63.5344	-56.7031	-64.2375	-64.5	-58.0469	-64.9	-58.2562	-64.7906	-59.2594	-66.4094	-65.425	-66.2719	-68.0188	-63.45	-67.7781	-65.1344
		0.46	4.64	-63.525	-56.775	-64.2906	-64.5188	-58.0062	-64.9219	-58.2625	-64.7812	-59.2	-66.4156	-65.4406	-66.2937	-67.9812	-63.5344	-67.8063	-65.1562
		0.46	4.66	-63.6219	-56.8812	-64.2219	-64.55	-58.0469	-65.0469	-58.2812	-64.8875	-59.2375	-66.4375	-65.4781	-66.2969	-67.9781	-63.5344	-67.7906	-65.1469
		0.46	4.68	-63.5812	-56.85	-64.2969	-64.6	-58.1	-65.0813	-58.3375	-64.9125	-59.3563	-66.5312	-65.5437	-66.3875	-68.05	-63.5094	-67.8688	-65.1281
		0.46	4.7	-63.6688	-56.8688	-64.35	-64.5875	-58.0906	-65.0594	-58.2906	-64.9313	-59.3875	-66.4938	-65.5875	-66.4	-68.0875	-63.5812	-67.8562	-65.2156
		0.46	4.72	-63.7781	-56.9562	-64.3594	-64.6	-58.1281	-65.1156	-58.2906	-64.9969	-59.375	-66.4938	-65.575	-66.4219	-68.0437	-63.5656	-67.8187	-65.1813
		0.46	4.74	-63.7938	-56.9688	-64.4375	-64.6813	-58.1844	-65.1406	-58.35	-65.075	-59.4938	-66.5875	-65.5844	-66.5	-68.1094	-63.6125	-67.9156	-65.1813
		0.46	4.76	-63.8219	-56.9188	-64.5	-64.6906	-58.1813	-65.1687	-58.3688	-65.1156	-59.475	-66.6188	-65.6813	-66.5906	-68.1813	-63.7406	-67.9094	-65.1
		0.46	4.78	-63.8812	-57.0219	-64.5656	-64.7188	-58.3	-65.2375	-58.35	-65.0969	-59.475	-66.6125	-65.6719	-66.5969	-68.1875	-63.6844	-67.9	-65.2438
		0.46	4.8	-63.8719	-57.0406	-64.6	-64.8094	-58.2656	-65.275	-58.4094	-65.1813	-59.5469	-66.6875	-65.6406	-66.5906	-68.2094	-63.7344	-67.975	-65.2438
		0.46	4.82	-63.9313	-57.0531	-64.5938	-64.8875	-58.275	-65.2812	-58.375	-65.1906	-59.5594	-66.6438	-65.8094	-66.6625	-68.2781	-63.7281	-68.0062	-65.2625
		0.46	4.84	-64	-57.0812	-64.6562	-64.8594	-58.3438	-65.375	-58.4219	-65.2	-59.55	-66.6906	-65.8094	-66.7063	-68.2906	-63.75	-68	-65.3562
		0.46	4.86	-64.025	-57.0969	-64.7	-64.9219	-58.375	-65.3969	-58.4938	-65.2156	-59.6	-66.7875	-65.875	-66.7188	-68.2812	-63.8063	-68.0531	-65.2219
		0.46	4.88	-64.05	-57.125	-64.7	-64.9906	-58.3937	-65.4125	-58.4719	-65.2594	-59.65	-66.8094	-65.9	-66.7094	-68.3063	-63.8094	-68.0938	-65.3
		0.46	4.9	-64.0719	-57.15	-64.7281	-64.925	-58.5187	-65.5	-58.45	-65.25	-59.625	-66.8906	-65.9469	-66.7875	-68.3594	-63.8	-68.075	-65.3219
		0.46	4.92	-64.1219	-57.2469	-64.8	-64.9313	-58.5312	-65.5125	-58.5219	-65.2781	-59.5781	-66.9	-65.95	-66.8	-68.3219	-63.8	-68.1188	-65.3125
		0.46	4.94	-64.1625	-57.2	-64.75	-65.0719	-58.55	-65.5125	-58.5469	-65.35	-59.625	-66.8438	-66.0219	-66.8187	-68.3094	-63.8406	-68.1875	-65.35
		0.46	4.96	-64.1875	-57.25	-64.7812	-65.1094	-58.6063	-65.5719	-58.575	-65.3812	-59.5156	-66.9	-66.1	-66.9313	-68.3688	-63.7969	-68.125	-65.4
[truncated: 2,751 more rows]

## Sheet: panel B
	Lead of inhibition (ms)	Time re. contralateral shock (ms)	Vm (mV)	Vm (mV)	Vm (mV)	Vm (mV)	Vm (mV)	Vm (mV)	Vm (mV)	Vm (mV)	Vm (mV)	Vm (mV)	Vm (mV)	Vm (mV)	Vm (mV)	Vm (mV)	Vm (mV)	Vm (mV)	Vm (mV)	Vm (mV)	Vm (mV)	Vm (mV)
	-0.8	0	-59.1281	-59.2219
	-0.8	0.02	-59.1219	-59.2031
	-0.8	0.04	-59.1406	-59.1906
	-0.8	0.06	-59.8406	-59.9437
	-0.8	0.08	-57.8937	-57.95
	-0.8	0.1	-45.15	-45.2
	-0.8	0.12	-43.6094	-43.7
	-0.8	0.14	-46.0594	-46.2094
	-0.8	0.16	-48.6844	-48.8375
	-0.8	0.18	-50.8781	-51.0281
	-0.8	0.2	-52.4469	-52.6219
	-0.8	0.22	-53.4969	-53.6219
	-0.8	0.24	-54.1	-54.2219
	-0.8	0.26	-54.3719	-54.4688
	-0.8	0.28	-54.4156	-54.5438
	-0.8	0.3	-54.3031	-54.3875
	-0.8	0.32	-54.0625	-54.1281
	-0.8	0.34	-53.7906	-53.8688
	-0.8	0.36	-53.4375	-53.5375
	-0.8	0.38	-53.075	-53.1531
	-0.8	0.4	-52.675	-52.7594
	-0.8	0.42	-52.2969	-52.4219
	-0.8	0.44	-51.9125	-52.0375
	-0.8	0.46	-51.4938	-51.6312
	-0.8	0.48	-51.1688	-51.2656
	-0.8	0.5	-50.7844	-50.875
	-0.8	0.52	-50.4281	-50.5344
	-0.8	0.54	-50.05	-50.175
	-0.8	0.56	-49.7687	-49.8312
	-0.8	0.58	-49.4094	-49.5062
	-0.8	0.6	-49.0781	-49.1625
	-0.8	0.62	-48.7531	-48.8
	-0.8	0.64	-48.4531	-48.4531
	-0.8	0.66	-48.2094	-48.1281
	-0.8	0.68	-47.9688	-47.725
	-0.8	0.7	-47.6813	-47.3156
	-0.8	0.72	-47.375	-46.7094
	-0.8	0.74	-47.0812	-45.7812
	-0.8	0.76	-46.8625	-44.2781
	-0.8	0.78	-46.6344	-42.0219
	-0.8	0.8	-46.3344	-38.9406
	-0.8	0.82	-46.05	-34.7844
	-0.8	0.84	-45.7125	-28.6437
	-0.8	0.86	-45.2	-20.0906
	-0.8	0.88	-44.325	-10.4125
	-0.8	0.9	-42.9	-1.67813
	-0.8	0.92	-41.0094	4.75
	-0.8	0.94	-38.5969	8.3
	-0.8	0.96	-35.6437	8.80313
	-0.8	0.98	-31.6594	6.65
	-0.8	1	-25.9937	2.4
	-0.8	1.02	-18.1844	-3.21563
	-0.8	1.04	-9.50313	-9.7
	-0.8	1.06	-1.65313	-16.6156
	-0.8	1.08	4.20625	-23.3188
	-0.8	1.1	7.5125	-29.7094
	-0.8	1.12	8.23125	-35.425
	-0.8	1.14	6.50313	-40.325
	-0.8	1.16	2.92812	-44.5
	-0.8	1.18	-1.97187	-47.8312
	-0.8	1.2	-7.71875	-50.5844
	-0.8	1.22	-13.9594	-52.6406
	-0.8	1.24	-20.2969	-54.3
	-0.8	1.26	-26.3844	-55.6219
	-0.8	1.28	-32	-56.5594
	-0.8	1.3	-36.8875	-57.325
	-0.8	1.32	-41.0656	-57.8844
	-0.8	1.34	-44.5344	-58.2531
	-0.8	1.36	-47.3937	-58.575
	-0.8	1.38	-49.6	-58.7906
	-0.8	1.4	-51.375	-58.9219
	-0.8	1.42	-52.7656	-59.0719
	-0.8	1.44	-53.825	-59.175
	-0.8	1.46	-54.6719	-59.1813
	-0.8	1.48	-55.2906	-59.225
	-0.8	1.5	-55.7	-59.2156
	-0.8	1.52	-56.0406	-59.2531
	-0.8	1.54	-56.2562	-59.3
	-0.8	1.56	-56.4531	-59.3281
	-0.8	1.58	-56.5219	-59.35
	-0.8	1.6	-56.6094	-59.3906
	-0.8	1.62	-56.6688	-59.4094
	-0.8	1.64	-56.7	-59.4375
	-0.8	1.66	-56.7719	-59.475
	-0.8	1.68	-56.7719	-59.5156
	-0.8	1.7	-56.7781	-59.4938
	-0.8	1.72	-56.75	-59.5
	-0.8	1.74	-56.7406	-59.55
	-0.8	1.76	-56.7969	-59.5469
	-0.8	1.78	-56.7844	-59.6063
	-0.8	1.8	-56.7875	-59.6469
	-0.8	1.82	-56.8	-59.6719
	-0.8	1.84	-56.8156	-59.7281
	-0.8	1.86	-56.8406	-59.775
	-0.8	1.88	-56.8969	-59.75
	-0.8	1.9	-56.9062	-59.7687
	-0.8	1.92	-56.95	-59.8031
	-0.8	1.94	-56.9406	-59.8
	-0.8	1.96	-56.9938	-59.8688
	-0.8	1.98	-57.0281	-59.9188
	-0.8	2	-57.0469	-59.9125
	-0.8	2.02	-57.1	-59.9188
	-0.8	2.04	-57.1063	-59.9156
	-0.8	2.06	-57.1375	-59.9594
	-0.8	2.08	-57.1562	-59.9813
	-0.8	2.1	-57.1813	-60.05
	-0.8	2.12	-57.2062	-60.0281
	-0.8	2.14	-57.2625	-60.0375
	-0.8	2.16	-57.275	-60.0187
	-0.8	2.18	-57.3688	-60.0094
	-0.8	2.2	-57.4375	-60.05
	-0.8	2.22	-57.4406	-60.0687
	-0.8	2.24	-57.4594	-60.1125
	-0.8	2.26	-57.5062	-60.1094
	-0.8	2.28	-57.5312	-60.1688
	-0.8	2.3	-57.5281	-60.2219
	-0.8	2.32	-57.6437	-60.2344
	-0.8	2.34	-57.7	-60.2562
	-0.8	2.36	-57.7344	-60.2625
	-0.8	2.38	-57.7781	-60.25
	-0.8	2.4	-57.8063	-60.2594
	-0.8	2.42	-57.8438	-60.2656
	-0.8	2.44	-57.8625	-60.2812
	-0.8	2.46	-57.9	-60.2281
	-0.8	2.48	-57.925	-60.2594
	-0.8	2.5	-58.0062	-60.2375
	-0.8	2.52	-58.0125	-60.2375
	-0.8	2.54	-58.0312	-60.25
	-0.8	2.56	-58.0375	-60.2562
	-0.8	2.58	-58.1219	-60.2344
	-0.8	2.6	-58.1437	-60.2844
	-0.8	2.62	-58.1719	-60.2719
	-0.8	2.64	-58.2062	-60.275
	-0.8	2.66	-58.2	-60.3344
	-0.8	2.68	-58.2594	-60.3438
	-0.8	2.7	-58.3	-60.2812
	-0.8	2.72	-58.3438	-60.2812
	-0.8	2.74	-58.3375	-60.3
	-0.8	2.76	-58.3875	-60.3
	-0.8	2.78	-58.4125	-60.2875
	-0.8	2.8	-58.4344	-60.2938
	-0.8	2.82	-58.5062	-60.2875
	-0.8	2.84	-58.5219	-60.3
	-0.8	2.86	-58.5094	-60.3031
	-0.8	2.88	-58.5281	-60.3
	-0.8	2.9	-58.5938	-60.3094
	-0.8	2.92	-58.5812	-60.3094
	-0.8	2.94	-58.6469	-60.3375
	-0.8	2.96	-58.6531	-60.3281
	-0.8	2.98	-58.6562	-60.3406
	-0.8	3	-58.675	-60.3094
	-0.8	3.02	-58.6594	-60.3375
	-0.8	3.04	-58.7188	-60.3469
	-0.8	3.06	-58.7687	-60.3375
	-0.8	3.08	-58.7594	-60.3312
	-0.8	3.1	-58.7875	-60.3406
	-0.8	3.12	-58.7969	-60.3375
	-0.8	3.14	-58.8	-60.3969
	-0.8	3.16	-58.825	-60.3438
	-0.8	3.18	-58.8812	-60.3375
	-0.8	3.2	-58.8469	-60.3031
	-0.8	3.22	-58.8906	-60.3063
	-0.8	3.24	-58.875	-60.3
	-0.8	3.26	-58.9188	-60.3375
	-0.8	3.28	-58.9719	-60.3
	-0.8	3.3	-58.9813	-60.2938
	-0.8	3.32	-59.025	-60.3
	-0.8	3.34	-59.0344	-60.3031
	-0.8	3.36	-59.0531	-60.3094
	-0.8	3.38	-59.0219	-60.325
	-0.8	3.4	-59.075	-60.3563
	-0.8	3.42	-59.1188	-60.35
	-0.8	3.44	-59.1063	-60.3219
	-0.8	3.46	-59.1375	-60.3
	-0.8	3.48	-59.1937	-60.3187
	-0.8	3.5	-59.2062	-60.3063
	-0.8	3.52	-59.1406	-60.2875
	-0.8	3.54	-59.25	-60.2594
	-0.8	3.56	-59.2562	-60.2687
	-0.8	3.58	-59.25	-60.2562
	-0.8	3.6	-59.3281	-60.2344
	-0.8	3.62	-59.3187	-60.225
	-0.8	3.64	-59.3781	-60.2062
	-0.8	3.66	-59.3656	-60.2375
	-0.8	3.68	-59.3438	-60.2469
	-0.8	3.7	-59.3656	-60.2156
	-0.8	3.72	-59.3406	-60.2188
	-0.8	3.74	-59.3719	-60.2156
	-0.8	3.76	-59.4375	-60.225
	-0.8	3.78	-59.4594	-60.1937
	-0.8	3.8	-59.4844	-60.2
	-0.8	3.82	-59.4719	-60.1875
	-0.8	3.84	-59.475	-60.2062
	-0.8	3.86	-59.45	-60.2031
	-0.8	3.88	-59.4781	-60.2219
	-0.8	3.9	-59.4844	-60.2188
	-0.8	3.92	-59.425	-60.1906
	-0.8	3.94	-59.4313	-60.1844
	-0.8	3.96	-59.4844	-60.1844
	-0.8	3.98	-59.5219	-60.1531
	-0.8	4	-59.475	-60.175
	-0.8	4.02	-59.5031	-60.1562
	-0.8	4.04	-59.5156	-60.1562
	-0.8	4.06	-59.5375	-60.1656
	-0.8	4.08	-59.5531	-60.15
	-0.8	4.1	-59.5563	-60.1094
	-0.8	4.12	-59.5125	-60.1219
	-0.8	4.14	-59.5625	-60.1375
	-0.8	4.16	-59.5344	-60.1312
	-0.8	4.18	-59.5125	-60.0969
	-0.8	4.2	-59.5625	-60.1188
	-0.8	4.22	-59.5687	-60.1
	-0.8	4.24	-59.5469	-60.0844
	-0.8	4.26	-59.5625	-60.1188
	-0.8	4.28	-59.5938	-60.1063
	-0.8	4.3	-59.5875	-60.1
	-0.8	4.32	-59.6188	-60.1156
	-0.8	4.34	-59.5938	-60.0844
	-0.8	4.36	-59.65	-60.1031
	-0.8	4.38	-59.6344	-60.1
	-0.8	4.4	-59.6344	-60.1219
	-0.8	4.42	-59.5969	-60.1188
	-0.8	4.44	-59.6219	-60.075
	-0.8	4.46	-59.6969	-60.0469
	-0.8	4.48	-59.6813	-60.0406
	-0.8	4.5	-59.6594	-60.0375
	-0.8	4.52	-59.6469	-60.0687
	-0.8	4.54	-59.6969	-60.0844
	-0.8	4.56	-59.6906	-60.1
	-0.8	4.58	-59.7062	-60.0781
	-0.8	4.6	-59.7219	-60.0531
	-0.8	4.62	-59.7031	-60.0625
	-0.8	4.64	-59.6969	-60.0281
	-0.8	4.66	-59.7094	-60.0375
	-0.8	4.68	-59.6875	-60.0531
	-0.8	4.7	-59.6656	-60.0312
	-0.8	4.72	-59.7188	-60.0219
	-0.8	4.74	-59.7313	-60.0125
	-0.8	4.76	-59.7281	-59.9625
	-0.8	4.78	-59.7625	-59.9562
	-0.8	4.8	-59.725	-59.9844
	-0.8	4.82	-59.7281	-59.975
	-0.8	4.84	-59.7375	-59.9906
	-0.8	4.86	-59.7062	-60.0156
	-0.8	4.88	-59.7438	-59.9656
	-0.8	4.9	-59.7875	-60
	-0.8	4.92	-59.7781	-59.9656
	-0.8	4.94	-59.7625	-59.9844
	-0.8	4.96	-59.8	-59.9969
	-0.8	4.98	-59.7906	-59.975
	-0.8	5	-59.7531	-59.95
	-0.7	0	-58.9875	-58.9906
	-0.7	0.02	-59.0156	-58.9875
	-0.7	0.04	-59.0125	-59.0156
	-0.7	0.06	-59.7188	-59.8281
	-0.7	0.08	-57.8219	-57.9062
	-0.7	0.1	-45.1125	-45.2406
	-0.7	0.12	-43.5344	-43.7281
	-0.7	0.14	-46.1094	-46.2375
	-0.7	0.16	-48.7687	-48.9
	-0.7	0.18	-51.2	-51.2531
	-0.7	0.2	-53.1469	-53.1719
	-0.7	0.22	-54.4656	-54.5125
	-0.7	0.24	-55.3656	-55.3906
	-0.7	0.26	-55.9031	-55.95
	-0.7	0.28	-56.1875	-56.2219
	-0.7	0.3	-56.2156	-56.2562
	-0.7	0.32	-56.125	-56.1875
	-0.7	0.34	-55.8875	-55.95
	-0.7	0.36	-55.5812	-55.65
	-0.7	0.38	-55.2656	-55.2969
	-0.7	0.4	-54.8594	-54.8625
	-0.7	0.42	-54.4094	-54.4844
	-0.7	0.44	-54	-54.0594
	-0.7	0.46	-53.5844	-53.5563
	-0.7	0.48	-53.1094	-53.1531
	-0.7	0.5	-52.6562	-52.7375
	-0.7	0.52	-52.275	-52.3719
	-0.7	0.54	-51.8875	-51.9844
	-0.7	0.56	-51.4906	-51.5938
	-0.7	0.58	-51.1094	-51.175
	-0.7	0.6	-50.7062	-50.8156
	-0.7	0.62	-50.3531	-50.4688
	-0.7	0.64	-50.0281	-50.1188
	-0.7	0.66	-49.65	-49.7375
	-0.7	0.68	-49.3125	-49.4375
	-0.7	0.7	-48.9375	-49.125
	-0.7	0.72	-48.6312	-48.7875
	-0.7	0.74	-48.3063	-48.45
	-0.7	0.76	-48.025	-48.1063
	-0.7	0.78	-47.7406	-47.7781
	-0.7	0.8	-47.4062	-47.3906
	-0.7	0.82	-47.1625	-46.9594
	-0.7	0.84	-46.875	-46.2938
	-0.7	0.86	-46.55	-45.2125
	-0.7	0.88	-46.1844	-43.5438
	-0.7	0.9	-45.6437	-41.2812
	-0.7	0.92	-44.6656	-38.4156
	-0.7	0.94	-43.0938	-34.6406
	-0.7	0.96	-40.9875	-29.45
	-0.7	0.98	-38.2469	-22.0344
	-0.7	1	-34.7	-13.0125
	-0.7	1.02	-29.725	-4.39062
	-0.7	1.04	-22.4656	2.4875
	-0.7	1.06	-13.4594	6.91875
	-0.7	1.08	-4.63438	8.54688
	-0.7	1.1	2.7	7.5375
	-0.7	1.12	7.4625	4.40625
	-0.7	1.14	9.44063	-0.325
	-0.7	1.16	8.63125	-6.0875
	-0.7	1.18	5.58437	-12.375
	-0.7	1.2	0.784375	-18.8563
	-0.7	1.22	-5	-25.1969
	-0.7	1.24	-11.4531	-31.0812
	-0.7	1.26	-18.1	-36.3031
	-0.7	1.28	-24.5	-40.6406
	-0.7	1.3	-30.4281	-44.3563
	-0.7	1.32	-35.6625	-47.375
	-0.7	1.34	-40.125	-49.725
	-0.7	1.36	-43.8312	-51.6312
	-0.7	1.38	-46.8719	-53.0781
	-0.7	1.4	-49.3156	-54.225
	-0.7	1.42	-51.2	-55.0781
	-0.7	1.44	-52.6437	-55.7281
	-0.7	1.46	-53.7219	-56.2438
	-0.7	1.48	-54.5312	-56.6156
	-0.7	1.5	-55.1844	-56.8688
	-0.7	1.52	-55.6719	-57.0812
	-0.7	1.54	-55.9531	-57.1906
	-0.7	1.56	-56.1094	-57.3219
	-0.7	1.58	-56.2406	-57.4062
	-0.7	1.6	-56.2594	-57.4781
	-0.7	1.62	-56.3187	-57.5281
	-0.7	1.64	-56.3656	-57.5375
	-0.7	1.66	-56.3563	-57.5
	-0.7	1.68	-56.325	-57.5062
	-0.7	1.7	-56.2969	-57.5187
	-0.7	1.72	-56.2812	-57.5062
	-0.7	1.74	-56.2438	-57.5125
	-0.7	1.76	-56.2031	-57.5625
	-0.7	1.78	-56.2094	-57.6125
	-0.7	1.8	-56.1813	-57.6719
	-0.7	1.82	-56.125	-57.7
	-0.7	1.84	-56.1594	-57.7406
	-0.7	1.86	-56.15	-57.75
	-0.7	1.88	-56.1219	-57.8094
	-0.7	1.9	-56.1312	-57.8375
	-0.7	1.92	-56.1437	-57.8563
	-0.7	1.94	-56.1437	-57.9313
	-0.7	1.96	-56.175	-57.9469
	-0.7	1.98	-56.2281	-58.0312
	-0.7	2	-56.2313	-58.0656
	-0.7	2.02	-56.2375	-58.0563
	-0.7	2.04	-56.2281	-58.1188
	-0.7	2.06	-56.2375	-58.1531
	-0.7	2.08	-56.2531	-58.1344
	-0.7	2.1	-56.3031	-58.1937
	-0.7	2.12	-56.35	-58.2125
	-0.7	2.14	-56.3625	-58.2438
	-0.7	2.16	-56.425	-58.3125
	-0.7	2.18	-56.4781	-58.3563
	-0.7	2.2	-56.4844	-58.4062
	-0.7	2.22	-56.5031	-58.4062
	-0.7	2.24	-56.5563	-58.4469
	-0.7	2.26	-56.6031	-58.4875
	-0.7	2.28	-56.625	-58.5125
	-0.7	2.3	-56.6969	-58.55
	-0.7	2.32	-56.7438	-58.5719
	-0.7	2.34	-56.7687	-58.6437
	-0.7	2.36	-56.8344	-58.6969
	-0.7	2.38	-56.9062	-58.6906
	-0.7	2.4	-56.9156	-58.7469
	-0.7	2.42	-56.9375	-58.8
	-0.7	2.44	-56.9781	-58.8063
	-0.7	2.46	-57.0062	-58.8531
	-0.7	2.48	-57.0687	-58.9062
	-0.7	2.5	-57.1188	-58.9125
	-0.7	2.52	-57.175	-58.9875
	-0.7	2.54	-57.1813	-58.9969
	-0.7	2.56	-57.2	-59.0687
	-0.7	2.58	-57.2844	-59.0875
	-0.7	2.6	-57.325	-59.1
	-0.7	2.62	-57.3406	-59.15
	-0.7	2.64	-57.4406	-59.1156
	-0.7	2.66	-57.4938	-59.1594
	-0.7	2.68	-57.525	-59.2219
	-0.7	2.7	-57.5969	-59.2062
	-0.7	2.72	-57.6063	-59.2156
	-0.7	2.74	-57.6531	-59.2562
	-0.7	2.76	-57.7156	-59.2375
	-0.7	2.78	-57.7531	-59.2375
	-0.7	2.8	-57.7594	-59.2531
	-0.7	2.82	-57.7812	-59.3156
	-0.7	2.84	-57.8344	-59.2906
	-0.7	2.86	-57.8438	-59.3187
	-0.7	2.88	-57.8719	-59.3312
	-0.7	2.9	-57.9188	-59.3656
	-0.7	2.92	-57.9219	-59.3875
	-0.7	2.94	-57.9594	-59.4094
	-0.7	2.96	-57.9906	-59.3625
	-0.7	2.98	-58.0344	-59.3969
	-0.7	3	-58.0719	-59.4031
	-0.7	3.02	-58.0969	-59.4344
	-0.7	3.04	-58.15	-59.4781
	-0.7	3.06	-58.1562	-59.4625
	-0.7	3.08	-58.2156	-59.4719
	-0.7	3.1	-58.2094	-59.4719
	-0.7	3.12	-58.2469	-59.4719
	-0.7	3.14	-58.2625	-59.5
	-0.7	3.16	-58.2719	-59.5156
	-0.7	3.18	-58.3219	-59.5281
	-0.7	3.2	-58.35	-59.5781
	-0.7	3.22	-58.3281	-59.6125
	-0.7	3.24	-58.375	-59.6188
	-0.7	3.26	-58.4094	-59.6156
	-0.7	3.28	-58.4344	-59.6125
	-0.7	3.3	-58.4344	-59.6531
	-0.7	3.32	-58.4813	-59.6656
	-0.7	3.34	-58.4844	-59.6094
	-0.7	3.36	-58.5125	-59.6312
	-0.7	3.38	-58.5156	-59.6969
	-0.7	3.4	-58.5563	-59.6875
	-0.7	3.42	-58.5	-59.7031
	-0.7	3.44	-58.5656	-59.7156
	-0.7	3.46	-58.5594	-59.7406
	-0.7	3.48	-58.5812	-59.7313
	-0.7	3.5	-58.6375	-59.75
	-0.7	3.52	-58.65	-59.7562
	-0.7	3.54	-58.65	-59.7594
	-0.7	3.56	-58.6031	-59.7313
	-0.7	3.58	-58.65	-59.7094
	-0.7	3.6	-58.6375	-59.7188
	-0.7	3.62	-58.5938	-59.7062
	-0.7	3.64	-58.6594	-59.7313
	-0.7	3.66	-58.7188	-59.7469
	-0.7	3.68	-58.75	-59.7469
	-0.7	3.7	-58.7406	-59.7125
	-0.7	3.72	-58.7438	-59.7344
	-0.7	3.74	-58.7969	-59.7125
	-0.7	3.76	-58.8125	-59.7031
	-0.7	3.78	-58.825	-59.7
	-0.7	3.8	-58.8125	-59.7125
	-0.7	3.82	-58.7906	-59.7094
	-0.7	3.84	-58.8344	-59.7625
	-0.7	3.86	-58.8563	-59.7594
	-0.7	3.88	-58.9219	-59.7719
	-0.7	3.9	-58.9406	-59.7938
	-0.7	3.92	-58.9375	-59.7781
	-0.7	3.94	-58.9188	-59.8125
	-0.7	3.96	-58.9	-59.7906
	-0.7	3.98	-58.9437	-59.8031
	-0.7	4	-58.9406	-59.775
	-0.7	4.02	-58.9562	-59.8063
	-0.7	4.04	-59.0062	-59.8156
	-0.7	4.06	-58.9844	-59.7969
	-0.7	4.08	-58.9813	-59.8187
	-0.7	4.1	-58.9656	-59.8031
	-0.7	4.12	-58.9938	-59.8406
	-0.7	4.14	-58.9813	-59.8344
	-0.7	4.16	-59.0187	-59.8312
	-0.7	4.18	-59.0187	-59.8344
	-0.7	4.2	-59.0375	-59.8281
	-0.7	4.22	-59.0687	-59.8187
	-0.7	4.24	-59.0656	-59.8406
	-0.7	4.26	-59.075	-59.85
	-0.7	4.28	-59.075	-59.875
	-0.7	4.3	-59.1312	-59.9
	-0.7	4.32	-59.0812	-59.8563
	-0.7	4.34	-59.1125	-59.85
	-0.7	4.36	-59.1125	-59.825
	-0.7	4.38	-59.1469	-59.8344
	-0.7	4.4	-59.1437	-59.8281
	-0.7	4.42	-59.1594	-59.8375
	-0.7	4.44	-59.1594	-59.8375
	-0.7	4.46	-59.15	-59.8344
	-0.7	4.48	-59.1781	-59.8219
	-0.7	4.5	-59.1594	-59.8281
	-0.7	4.52	-59.1406	-59.8219
	-0.7	4.54	-59.1344	-59.8344
	-0.7	4.56	-59.1469	-59.825
	-0.7	4.58	-59.1719	-59.8563
	-0.7	4.6	-59.175	-59.8344
	-0.7	4.62	-59.1813	-59.7906
	-0.7	4.64	-59.2344	-59.7781
	-0.7	4.66	-59.1937	-59.8
	-0.7	4.68	-59.2062	-59.8719
	-0.7	4.7	-59.2375	-59.8844
	-0.7	4.72	-59.1875	-59.8531
	-0.7	4.74	-59.1937	-59.8187
	-0.7	4.76	-59.2	-59.7812
	-0.7	4.78	-59.225	-59.8156
	-0.7	4.8	-59.2313	-59.8375
	-0.7	4.82	-59.2625	-59.9
	-0.7	4.84	-59.2438	-59.8656
	-0.7	4.86	-59.2562	-59.8688
	-0.7	4.88	-59.2719	-59.8531
	-0.7	4.9	-59.2844	-59.8312
	-0.7	4.92	-59.25	-59.8563
	-0.7	4.94	-59.2719	-59.8344
	-0.7	4.96	-59.2406	-59.85
	-0.7	4.98	-59.275	-59.8563
	-0.7	5	-59.3125	-59.8187
	-0.6	0	-59.1844	-59.2844	-61.0344	-60.8531	-60.75	-60.8781	-61.0969	-60.9219	-60.9469	-60.8	-58.9625	-57.6094	-57.6688	-57.5531	-57.6	-57.5906
	-0.6	0.02	-59.1625	-59.2469	-61.05	-60.85	-60.7438	-60.8906	-61.1188	-60.9688	-60.9781	-60.8	-58.9344	-57.6625	-57.6375	-57.5687	-57.5563	-57.6375
	-0.6	0.04	-59.1594	-59.2938	-61.0719	-60.8969	-60.7469	-60.8844	-61.0969	-60.9156	-60.95	-60.7812	-58.9313	-57.675	-57.6219	-57.5625	-57.5812	-57.6281
	-0.6	0.06	-59.9875	-60.0844	-62.0594	-61.75	-61.7094	-61.8688	-61.9781	-61.825	-61.8094	-61.675	-59.7969	-58.6156	-58.5406	-58.4562	-58.4938	-58.4938
	-0.6	0.08	-58	-58.1406	-60.0938	-59.825	-59.75	-59.9375	-60.0906	-59.975	-59.975	-59.825	-57.9969	-56.8063	-56.7406	-56.65	-56.6562	-56.575
	-0.6	0.1	-45.1844	-45.3563	-46.5625	-46.3406	-46.2125	-46.3875	-47.0875	-47.0062	-47	-46.9188	-45.4719	-43.8937	-43.8031	-43.6906	-43.6281	-43.4781
	-0.6	0.12	-43.6969	-43.8187	-44.85	-44.6	-44.5156	-44.5969	-45.4469	-45.325	-45.375	-45.2188	-43.9906	-42.2188	-42.1688	-42.0281	-41.9875	-41.8094
	-0.6	0.14	-46.2406	-46.3594	-47.8094	-47.5375	-47.4688	-47.5969	-48.0438	-47.9469	-47.95	-47.8438	-46.4188	-44.7719	-44.7031	-44.5312	-44.5656	-44.5031
	-0.6	0.16	-49.0594	-49.1875	-50.7938	-50.4969	-50.4062	-50.575	-50.8094	-50.7	-50.6813	-50.5656	-49.1312	-47.4437	-47.3875	-47.2406	-47.2781	-47.2562
	-0.6	0.18	-51.4594	-51.6437	-53.2594	-52.9594	-52.9125	-53.0469	-53.1937	-53.0719	-53.0187	-52.875	-51.4281	-49.75	-49.7062	-49.5406	-49.6125	-49.65
	-0.6	0.2	-53.3563	-53.55	-55.1781	-54.8969	-54.8875	-55.0187	-55.1219	-54.8625	-54.8688	-54.7156	-53.2313	-51.6531	-51.55	-51.4375	-51.4156	-51.5844
	-0.6	0.22	-54.7906	-54.9313	-56.5938	-56.3563	-56.3063	-56.425	-56.5281	-56.2938	-56.3	-56.1562	-54.575	-53.0812	-52.9156	-52.8187	-52.8563	-52.9844
	-0.6	0.24	-55.8063	-55.9313	-57.6344	-57.3781	-57.4	-57.4781	-57.5281	-57.3656	-57.3719	-57.1719	-55.5125	-54.1031	-53.9094	-53.8812	-53.8906	-54.0344
	-0.6	0.26	-56.4625	-56.5719	-58.2625	-57.9938	-58.0406	-58.1063	-58.1312	-57.9562	-57.9313	-57.8438	-56.1375	-54.7438	-54.5594	-54.4969	-54.5187	-54.6531
	-0.6	0.28	-56.9813	-57.0594	-58.6469	-58.3875	-58.4469	-58.5312	-58.5375	-58.3844	-58.35	-58.2625	-56.6688	-55.1531	-55	-54.9281	-54.9688	-55.0687
	-0.6	0.3	-57.3563	-57.4188	-58.9188	-58.6063	-58.6594	-58.7938	-58.7219	-58.6188	-58.5969	-58.4813	-57.0312	-55.3469	-55.2219	-55.1813	-55.1594	-55.3
	-0.6	0.32	-57.6406	-57.6969	-59.0406	-58.6875	-58.775	-58.8563	-58.75	-58.6344	-58.625	-58.5375	-57.2844	-55.3719	-55.2156	-55.2406	-55.2125	-55.3563
	-0.6	0.34	-57.8125	-57.8656	-58.9688	-58.625	-58.6625	-58.7969	-58.6813	-58.5625	-58.5406	-58.45	-57.3937	-55.2625	-55.1344	-55.0781	-55.1281	-55.2188
	-0.6	0.36	-57.8	-57.8719	-58.7406	-58.4313	-58.475	-58.5531	-58.4344	-58.3469	-58.3187	-58.1656	-57.3063	-54.95	-54.825	-54.7687	-54.8125	-55.0375
	-0.6	0.38	-57.6406	-57.7969	-58.3844	-58.1219	-58.1344	-58.2125	-58.0625	-57.9437	-57.9094	-57.7906	-57.1969	-54.5594	-54.4031	-54.4031	-54.4125	-54.7125
	-0.6	0.4	-57.4188	-57.5938	-57.95	-57.7156	-57.6906	-57.7844	-57.5719	-57.5062	-57.4188	-57.3312	-56.9094	-54.1094	-53.9437	-53.9125	-53.9813	-54.2656
	-0.6	0.42	-57.1562	-57.3	-57.3875	-57.1469	-57.1594	-57.2719	-57.0656	-56.9688	-56.8937	-56.7938	-56.5812	-53.5156	-53.3406	-53.3344	-53.4375	-53.6813
	-0.6	0.44	-56.7687	-56.8875	-56.825	-56.5375	-56.5938	-56.7	-56.4906	-56.4094	-56.2969	-56.1281	-56.2031	-52.8969	-52.6969	-52.7281	-52.8187	-53.1594
	-0.6	0.46	-56.4125	-56.4906	-56.1906	-55.9125	-55.9437	-56.0469	-55.9031	-55.7594	-55.675	-55.5625	-55.7969	-52.2469	-52.0781	-52.1094	-52.2031	-52.4969
	-0.6	0.48	-55.9938	-56.1	-55.5187	-55.2344	-55.325	-55.4031	-55.2719	-55.1312	-55.0344	-54.8844	-55.3656	-51.5781	-51.4406	-51.4594	-51.5062	-51.8844
	-0.6	0.5	-55.5625	-55.6219	-54.8563	-54.5875	-54.6281	-54.7188	-54.65	-54.5187	-54.4188	-54.2781	-54.875	-50.9	-50.7875	-50.7938	-50.8625	-51.2906
	-0.6	0.52	-55.1688	-55.1469	-54.2156	-53.8812	-53.9406	-54.0687	-54.025	-53.8781	-53.7562	-53.6469	-54.3844	-50.3	-50.1156	-50.1344	-50.2219	-50.6281
	-0.6	0.54	-54.7313	-54.7406	-53.4906	-53.2125	-53.2656	-53.4375	-53.3719	-53.2531	-53.1406	-53.0687	-53.9031	-49.6531	-49.4688	-49.5438	-49.625	-50
	-0.6	0.56	-54.2375	-54.3281	-52.8156	-52.5812	-52.6063	-52.7906	-52.75	-52.65	-52.525	-52.4656	-53.425	-48.9844	-48.8844	-48.9094	-49.0187	-49.3656
	-0.6	0.58	-53.7938	-53.8375	-52.1469	-51.9219	-51.9469	-52.1406	-52.2062	-52.0438	-51.925	-51.8281	-52.9562	-48.4	-48.2781	-48.3375	-48.4281	-48.7938
	-0.6	0.6	-53.3438	-53.3719	-51.5125	-51.2906	-51.2656	-51.4375	-51.6188	-51.4969	-51.3969	-51.3063	-52.6	-47.7656	-47.65	-47.8094	-47.7844	-48.2156
	-0.6	0.62	-52.8812	-52.925	-50.8656	-50.65	-50.65	-50.875	-51.0812	-50.95	-50.8688	-50.7375	-52.1375	-47.1844	-47.1063	-47.2406	-47.1719	-47.5969
	-0.6	0.64	-52.4969	-52.4781	-50.2812	-50	-50.0719	-50.2	-50.5656	-50.4344	-50.3438	-50.1688	-51.6688	-46.7188	-46.5812	-46.6469	-46.6688	-47.025
	-0.6	0.66	-52.0656	-52.05	-49.6844	-49.4188	-49.5312	-49.6719	-50.0906	-49.9656	-49.9094	-49.7188	-51.2	-46.2062	-46.0438	-46.1125	-46.1469	-46.5438
	-0.6	0.68	-51.6688	-51.6781	-49.0875	-48.7844	-48.9531	-49.1063	-49.5875	-49.5	-49.4688	-49.25	-50.7938	-45.6562	-45.5	-45.6125	-45.5875	-46.0344
	-0.6	0.7	-51.3094	-51.2781	-48.4844	-48.1437	-48.3688	-48.5094	-49.1437	-49.1094	-48.9625	-48.8063	-50.3594	-45.1969	-44.9938	-45.1469	-45.1344	-45.4969
	-0.6	0.72	-50.9344	-50.95	-47.9125	-47.3	-47.7	-47.8563	-48.675	-48.7	-48.4969	-48.4062	-49.975	-44.7313	-44.475	-44.65	-44.6656	-44.9594
	-0.6	0.74	-50.55	-50.6063	-47.0781	-45.9906	-46.7	-47.1	-48.2125	-48.3219	-48.0938	-47.9656	-49.5312	-44.3094	-43.9062	-44.1875	-44.1	-44.4094
	-0.6	0.76	-50.2281	-50.3406	-45.6969	-43.8563	-45.0281	-45.8812	-47.8219	-48	-47.7094	-47.5656	-49.1063	-43.85	-43.2188	-43.7	-43.5719	-43.7
	-0.6	0.78	-49.85	-50.0344	-43.4781	-40.8125	-42.4344	-43.8875	-47.3812	-47.6469	-47.2594	-47.15	-48.7188	-43.3875	-42.1125	-43.1	-42.7094	-42.6094
	-0.6	0.8	-49.5875	-49.7375	-40.3688	-36.575	-38.8688	-41.0594	-46.8594	-47.3719	-46.7844	-46.7469	-48.3	-42.8812	-40.2375	-42.1594	-41.3312	-40.7719
	-0.6	0.82	-49.3406	-49.5	-36.0938	-30.3188	-33.9375	-37.05	-46.0656	-47.15	-46.0656	-46.0594	-47.9125	-42.225	-37.475	-40.7	-39.125	-38.1719
	-0.6	0.84	-49.1562	-49.3281	-29.7875	-21.2062	-26.2687	-31.2625	-44.6562	-46.925	-44.7625	-44.8844	-47.4875	-41.0844	-33.55	-38.3156	-35.9875	-34.6156
	-0.6	0.86	-49.0563	-49.3	-20.5938	-10.5156	-16.0688	-22.5781	-42.4906	-46.4688	-42.7	-43.0219	-46.7687	-39.2562	-27.6313	-35.05	-31.7844	-29.5656
	-0.6	0.88	-48.9844	-49.2812	-10.05	-0.71875	-5.50625	-12.075	-39.5094	-45.5969	-39.7906	-40.3469	-45.7344	-36.6281	-19.0781	-30.4625	-25.5938	-22.1094
	-0.6	0.9	-49.025	-49.4469	-0.43125	6.7375	3.31562	-2.13125	-35.4594	-44.1312	-35.75	-36.9469	-44.0625	-33.1312	-9.01562	-23.6437	-16.9188	-12.5688
	-0.6	0.92	-49.2125	-49.6656	6.79688	10.9187	9.31875	5.64375	-29.6469	-42.0281	-29.8687	-32.3	-41.7531	-28.1281	0.415625	-14.4937	-7.20312	-2.90625
	-0.6	0.94	-49.5062	-50.0469	10.7656	11.8406	11.9656	10.2844	-21.2469	-39.3219	-21.2969	-25.4469	-38.8563	-20.7687	7.79375	-4.8625	1.5125	4.9125
	-0.6	0.96	-49.9031	-50.5187	11.5375	9.65312	11.3188	11.6438	-11.35	-35.8906	-11.2219	-16.4031	-35.0531	-11.5406	12.225	3.41563	7.9625	10.1187
	-0.6	0.98	-50.3406	-51.0563	9.28125	4.96875	7.91563	9.92188	-2.15313	-31.25	-1.87188	-6.95	-29.6281	-2.42812	13.3531	9.25313	11.5437	12.15
	-0.6	1	-50.8875	-51.6156	4.58125	-1.31875	2.35625	5.79063	4.96875	-24.55	5.37187	1.12812	-22.0438	5.0125	11.5219	12.0938	12.1187	11.2937
	-0.6	1.02	-51.4781	-52.2188	-1.65937	-8.58438	-4.61875	-0.178125	9.22188	-15.7188	9.66875	6.775	-13.0281	9.90625	7.37187	11.9406	9.975	7.99062
	-0.6	1.04	-52.1063	-52.875	-8.8625	-16.2344	-12.2188	-7.16875	10.3406	-6.64687	10.8844	9.52812	-4.36875	11.7812	1.6125	9.29062	5.77812	2.87812
	-0.6	1.06	-52.7656	-53.5125	-16.4969	-23.6594	-19.9469	-14.7375	8.73438	1.00937	9.2625	9.34375	2.4125	10.95	-5.11562	4.70312	0.084375	-3.42188
	-0.6	1.08	-53.4469	-54.1375	-23.8937	-30.4531	-27.175	-22.1406	4.76875	6.28438	5.27812	6.7125	6.74687	7.81875	-12.3313	-1.25312	-6.41875	-10.3
	-0.6	1.1	-54.0719	-54.75	-30.6781	-36.4375	-33.6	-29.0438	-0.81875	8.76562	-0.36875	2.05312	8.41875	2.95937	-19.3875	-8.025	-13.3313	-17.3344
	-0.6	1.12	-54.6813	-55.3125	-36.6094	-41.4469	-39.0594	-35.1125	-7.45937	8.55625	-7.06563	-3.96875	7.50625	-3.00312	-26.0031	-15.0125	-20.1281	-24.0875
	-0.6	1.14	-55.2844	-55.8688	-41.6094	-45.5	-43.6125	-40.225	-14.5938	5.95625	-14.2344	-10.7281	4.52187	-9.65	-31.7844	-21.8281	-26.5	-30.1875
	-0.6	1.16	-55.8375	-56.3969	-45.6688	-48.7719	-47.2219	-44.4	-21.6812	1.525	-21.4	-17.75	0.009375	-16.4438	-36.6937	-28.0344	-32.15	-35.45
	-0.6	1.18	-56.35	-56.8438	-48.8625	-51.2625	-50.0438	-47.7594	-28.275	-4.20625	-28.0781	-24.5969	-5.54375	-22.9	-40.7656	-33.5094	-36.9813	-39.8656
	-0.6	1.2	-56.8719	-57.2313	-51.3719	-53.1875	-52.325	-50.3969	-34.1813	-10.6219	-33.9906	-30.8719	-11.6875	-28.8937	-44.1437	-38.1281	-41.0344	-43.45
	-0.6	1.22	-57.3156	-57.6188	-53.3281	-54.6375	-54.0594	-52.4156	-39.2188	-17.3969	-39.05	-36.3469	-18.0531	-34	-46.7125	-42	-44.3406	-46.35
	-0.6	1.24	-57.75	-58.0281	-54.8094	-55.7188	-55.2625	-53.9969	-43.375	-24.0094	-43.2188	-40.9719	-24.3344	-38.4	-48.7062	-45.0563	-46.9313	-48.6
	-0.6	1.26	-58.1188	-58.3406	-55.8969	-56.5312	-56.1625	-55.1156	-46.75	-30.125	-46.6688	-44.8	-30.1812	-42.05	-50.3438	-47.4719	-49.0031	-50.3312
	-0.6	1.28	-58.4719	-58.6375	-56.7219	-57.0406	-56.8375	-55.9	-49.4625	-35.575	-49.35	-47.9156	-35.4313	-44.9625	-51.4906	-49.4062	-50.6375	-51.7125
	-0.6	1.3	-58.8312	-58.9156	-57.3469	-57.4281	-57.3312	-56.525	-51.5531	-40.2313	-51.5031	-50.4156	-39.9094	-47.2844	-52.2812	-50.8625	-51.8094	-52.7188
	-0.6	1.32	-59.1562	-59.1813	-57.7625	-57.7062	-57.6156	-56.9969	-53.25	-44.1	-53.1312	-52.35	-43.675	-49.1156	-52.9719	-51.9906	-52.7406	-53.5062
	-0.6	1.34	-59.4625	-59.3844	-58.0875	-57.85	-57.8531	-57.275	-54.4375	-47.2469	-54.3375	-53.85	-46.8156	-50.4875	-53.4594	-52.8125	-53.4031	-54.0938
	-0.6	1.36	-59.7438	-59.6125	-58.2344	-57.9031	-58.0687	-57.4	-55.3875	-49.8125	-55.2812	-55.0375	-49.375	-51.5594	-53.7969	-53.4531	-53.925	-54.4437
	-0.6	1.38	-59.9625	-59.8094	-58.3812	-57.975	-58.1813	-57.5406	-56.0469	-51.8219	-55.9188	-55.9656	-51.3344	-52.4125	-53.9656	-53.9719	-54.2531	-54.7625
	-0.6	1.4	-60.175	-60.0187	-58.4375	-57.9969	-58.2219	-57.6156	-56.5844	-53.3781	-56.4469	-56.5844	-52.9156	-53.0344	-54.0969	-54.2812	-54.5656	-55
	-0.6	1.42	-60.3969	-60.2062	-58.4719	-57.9375	-58.2625	-57.6375	-56.9625	-54.6188	-56.7875	-57.075	-54.0906	-53.525	-54.125	-54.525	-54.7656	-55.1562
	-0.6	1.44	-60.6063	-60.3156	-58.5031	-57.9562	-58.2719	-57.6	-57.2031	-55.6063	-57.025	-57.5062	-55.0312	-53.875	-54.1719	-54.7	-54.9313	-55.3031
	-0.6	1.46	-60.75	-60.4	-58.5	-57.9062	-58.2313	-57.5781	-57.4094	-56.3	-57.225	-57.7969	-55.7562	-54.0625	-54.1844	-54.8125	-55.0156	-55.3844
	-0.6	1.48	-60.9344	-60.5062	-58.5187	-57.9062	-58.2438	-57.5812	-57.4969	-56.8969	-57.3375	-57.9969	-56.2812	-54.2125	-54.2156	-54.9219	-55.1406	-55.45
	-0.6	1.5	-61.075	-60.6594	-58.5563	-57.9406	-58.2438	-57.5594	-57.6094	-57.3281	-57.3625	-58.1781	-56.6281	-54.3156	-54.2531	-54.9688	-55.1781	-55.5031
	-0.6	1.52	-61.2094	-60.7313	-58.5844	-57.9125	-58.2375	-57.4813	-57.6688	-57.6656	-57.3781	-58.3	-56.9344	-54.3906	-54.25	-54.9938	-55.2125	-55.5687
	-0.6	1.54	-61.2875	-60.7906	-58.5438	-57.85	-58.2188	-57.4594	-57.7188	-57.9094	-57.4125	-58.3688	-57.0875	-54.4344	-54.2375	-54.9969	-55.2031	-55.5969
	-0.6	1.56	-61.4125	-60.8937	-58.5406	-57.8563	-58.2125	-57.4844	-57.7219	-58.1	-57.3781	-58.4781	-57.2188	-54.4313	-54.275	-55.0375	-55.1625	-55.6094
	-0.6	1.58	-61.5062	-60.9844	-58.6031	-57.9125	-58.2094	-57.3812	-57.7219	-58.225	-57.3469	-58.5281	-57.35	-54.45	-54.3	-55.05	-55.2031	-55.5687
	-0.6	1.6	-61.5844	-61.0563	-58.65	-57.9406	-58.1875	-57.4344	-57.75	-58.375	-57.3781	-58.5781	-57.4188	-54.4875	-54.3031	-55.0656	-55.2156	-55.5781
	-0.6	1.62	-61.6437	-61.0812	-58.6531	-57.9688	-58.1781	-57.35	-57.725	-58.3969	-57.3594	-58.5938	-57.45	-54.55	-54.275	-55.0938	-55.2344	-55.6312
	-0.6	1.64	-61.7062	-61.1219	-58.6625	-57.9719	-58.2094	-57.3063	-57.7656	-58.4625	-57.3063	-58.6656	-57.4969	-54.525	-54.3063	-55.1625	-55.2844	-55.6531
	-0.6	1.66	-61.7938	-61.1969	-58.7281	-58.0312	-58.2281	-57.35	-57.7844	-58.5563	-57.3	-58.7094	-57.5156	-54.55	-54.2938	-55.15	-55.3031	-55.7094
	-0.6	1.68	-61.8656	-61.2844	-58.7062	-58.0156	-58.3063	-57.3844	-57.8	-58.5812	-57.2469	-58.7156	-57.4938	-54.5312	-54.3688	-55.1625	-55.2469	-55.7031
	-0.6	1.7	-61.9344	-61.2781	-58.7812	-58.0719	-58.3312	-57.3781	-57.8531	-58.6188	-57.225	-58.725	-57.4906	-54.5062	-54.3781	-55.2125	-55.225	-55.6937
	-0.6	1.72	-61.9656	-61.3406	-58.8281	-58.1344	-58.3438	-57.375	-57.8844	-58.6469	-57.2125	-58.7875	-57.5312	-54.55	-54.4281	-55.25	-55.2625	-55.75
	-0.6	1.74	-62.0187	-61.3719	-58.8406	-58.15	-58.3469	-57.3937	-57.8812	-58.6781	-57.2125	-58.8594	-57.5187	-54.5625	-54.4594	-55.2375	-55.2938	-55.7687
	-0.6	1.76	-62.0875	-61.3531	-58.825	-58.2094	-58.4094	-57.4594	-57.9344	-58.8	-57.2188	-58.8625	-57.5438	-54.6	-54.5187	-55.3438	-55.3625	-55.8281
	-0.6	1.78	-62.1094	-61.4062	-58.875	-58.3063	-58.4062	-57.4938	-57.9437	-58.8625	-57.2687	-58.875	-57.5	-54.6375	-54.5438	-55.3719	-55.4375	-55.8563
	-0.6	1.8	-62.125	-61.4531	-58.975	-58.3187	-58.4625	-57.4594	-57.9313	-58.8781	-57.2844	-58.875	-57.55	-54.6625	-54.5438	-55.3875	-55.4781	-55.8937
	-0.6	1.82	-62.1312	-61.4531	-59.0187	-58.3281	-58.4906	-57.4813	-57.9813	-58.85	-57.2687	-58.8906	-57.5844	-54.7219	-54.6125	-55.4031	-55.5406	-55.95
	-0.6	1.84	-62.1562	-61.5	-59.025	-58.4219	-58.5469	-57.4719	-58	-58.9813	-57.2531	-58.975	-57.6156	-54.7812	-54.6562	-55.4375	-55.5687	-56
	-0.6	1.86	-62.1469	-61.5094	-59.0719	-58.4469	-58.6	-57.5156	-58.0375	-58.9594	-57.2781	-59.0906	-57.65	-54.8375	-54.7469	-55.4562	-55.6063	-56
	-0.6	1.88	-62.1719	-61.5656	-59.1125	-58.475	-58.65	-57.5687	-58.075	-59.0375	-57.3406	-59.1219	-57.6469	-54.875	-54.8063	-55.475	-55.6	-56.0375
	-0.6	1.9	-62.1625	-61.5969	-59.1406	-58.5156	-58.7281	-57.5875	-58.0938	-59.0563	-57.3219	-59.1469	-57.6781	-54.9469	-54.875	-55.5531	-55.6937	-56.05
	-0.6	1.92	-62.1625	-61.5719	-59.1906	-58.5375	-58.7188	-57.6375	-58.1437	-59.1219	-57.3375	-59.2156	-57.6625	-54.9344	-54.9	-55.6	-55.7125	-56.1219
	-0.6	1.94	-62.1906	-61.5969	-59.275	-58.6125	-58.775	-57.7219	-58.2062	-59.1594	-57.4	-59.2406	-57.6937	-55.0281	-54.9813	-55.6219	-55.7406	-56.2
	-0.6	1.96	-62.25	-61.6	-59.2344	-58.6344	-58.8375	-57.7781	-58.2875	-59.2344	-57.5	-59.2938	-57.7219	-55.0812	-54.9437	-55.6625	-55.7844	-56.2
	-0.6	1.98	-62.275	-61.5969	-59.2938	-58.6813	-58.8969	-57.7938	-58.3	-59.2531	-57.5406	-59.3719	-57.7406	-55.1188	-55.0156	-55.7062	-55.8812	-56.1969
	-0.6	2	-62.2562	-61.5875	-59.3063	-58.7594	-58.9344	-57.8344	-58.3531	-59.3125	-57.5563	-59.4219	-57.7156	-55.1688	-55.0563	-55.7969	-55.8906	-56.2687
	-0.6	2.02	-62.2469	-61.5875	-59.4094	-58.85	-59.0219	-57.8438	-58.3875	-59.35	-57.6219	-59.4656	-57.7062	-55.2156	-55.15	-55.8719	-55.9656	-56.3
	-0.6	2.04	-62.2281	-61.6	-59.4188	-58.9	-59.0125	-57.9094	-58.4219	-59.4	-57.65	-59.4813	-57.7313	-55.2469	-55.1937	-55.925	-55.9688	-56.3781
	-0.6	2.06	-62.2156	-61.6312	-59.4281	-58.8719	-59.0125	-57.9344	-58.4906	-59.45	-57.7	-59.5406	-57.8375	-55.3	-55.2406	-55.9375	-55.9594	-56.4094
	-0.6	2.08	-62.1844	-61.6219	-59.5062	-58.9437	-59.0844	-58.0094	-58.5312	-59.5187	-57.75	-59.575	-57.7906	-55.3781	-55.3219	-55.9719	-56.0312	-56.4437
	-0.6	2.1	-62.1594	-61.6063	-59.5563	-59.05	-59.1437	-58.1063	-58.6	-59.5531	-57.7469	-59.65	-57.8375	-55.4688	-55.3594	-56	-56.15	-56.4594
	-0.6	2.12	-62.15	-61.6188	-59.5594	-59.0969	-59.15	-58.1125	-58.625	-59.6125	-57.8063	-59.6781	-57.8625	-55.5531	-55.35	-56.0312	-56.1969	-56.5156
	-0.6	2.14	-62.1469	-61.6406	-59.6	-59.1125	-59.2062	-58.1281	-58.6906	-59.6437	-57.8688	-59.65	-57.9344	-55.5281	-55.4313	-56.0563	-56.225	-56.5563
	-0.6	2.16	-62.1469	-61.5906	-59.6562	-59.15	-59.2438	-58.15	-58.7125	-59.7313	-57.95	-59.7	-57.9437	-55.55	-55.4625	-56.15	-56.2812	-56.5125
	-0.6	2.18	-62.1188	-61.5875	-59.6969	-59.1875	-59.2625	-58.175	-58.7875	-59.75	-57.9906	-59.7969	-57.9719	-55.6125	-55.5031	-56.1719	-56.3	-56.5656
	-0.6	2.2	-62.0781	-61.5531	-59.7281	-59.2281	-59.2812	-58.2406	-58.8219	-59.8187	-58.05	-59.8156	-58.0125	-55.6594	-55.6188	-56.2406	-56.2938	-56.5812
	-0.6	2.22	-62.0656	-61.5719	-59.8125	-59.2625	-59.3875	-58.3219	-58.8438	-59.8531	-58.075	-59.8219	-58.0469	-55.7125	-55.65	-56.2594	-56.3438	-56.6
	-0.6	2.24	-62.05	-61.5156	-59.825	-59.3219	-59.3781	-58.3187	-58.9344	-59.8688	-58.1625	-59.8875	-58.0938	-55.7062	-55.6312	-56.2687	-56.3812	-56.6688
	-0.6	2.26	-62.0469	-61.5187	-59.825	-59.35	-59.4375	-58.3937	-58.9562	-59.9	-58.2406	-59.9	-58.1188	-55.7406	-55.725	-56.3094	-56.4313	-56.6562
	-0.6	2.28	-62.05	-61.5438	-59.9094	-59.4	-59.45	-58.4562	-58.9844	-59.9313	-58.2938	-59.9094	-58.1156	-55.8406	-55.7438	-56.3688	-56.4969	-56.7188
	-0.6	2.3	-62.0062	-61.5187	-59.975	-59.4062	-59.4156	-58.5344	-59.0312	-59.9688	-58.3281	-59.9875	-58.15	-55.8812	-55.7656	-56.4188	-56.5438	-56.7687
	-0.6	2.32	-62.0594	-61.4813	-59.9875	-59.4344	-59.4594	-58.5687	-59.1	-60.0156	-58.3375	-60.0187	-58.1562	-55.9562	-55.8219	-56.4094	-56.5375	-56.7687
	-0.6	2.34	-61.9844	-61.525	-60.0312	-59.5	-59.4844	-58.5781	-59.175	-60.0312	-58.3875	-60.05	-58.1781	-55.95	-55.8688	-56.4469	-56.6063	-56.8187
	-0.6	2.36	-61.975	-61.475	-60.0594	-59.5438	-59.4906	-58.5719	-59.25	-60.1188	-58.3969	-60.0687	-58.25	-56.0563	-55.9562	-56.4719	-56.6375	-56.875
	-0.6	2.38	-61.9594	-61.4875	-60.0812	-59.5687	-59.5	-58.6156	-59.2562	-60.1906	-58.4469	-60.1125	-58.2844	-56.1	-55.9719	-56.5	-56.6562	-56.8406
	-0.6	2.4	-61.9219	-61.475	-60.1094	-59.625	-59.5156	-58.65	-59.2938	-60.1875	-58.4844	-60.15	-58.2844	-56.1	-56.0438	-56.5812	-56.6656	-56.875
	-0.6	2.42	-61.9219	-61.4813	-60.15	-59.6406	-59.5594	-58.65	-59.3281	-60.1875	-58.5281	-60.125	-58.3563	-56.1656	-56.0844	-56.6188	-56.6844	-56.925
	-0.6	2.44	-61.9	-61.4531	-60.1531	-59.6625	-59.6688	-58.6594	-59.4062	-60.2125	-58.5687	-60.2	-58.3531	-56.1594	-56.1437	-56.6312	-56.7031	-56.9281
	-0.6	2.46	-61.9	-61.475	-60.1281	-59.6813	-59.6719	-58.7656	-59.4375	-60.2469	-58.5906	-60.2875	-58.3812	-56.1781	-56.1719	-56.6188	-56.7406	-56.9406
	-0.6	2.48	-61.8625	-61.4156	-60.1594	-59.7125	-59.7	-58.8	-59.4562	-60.2406	-58.6719	-60.2719	-58.4719	-56.2656	-56.2469	-56.6375	-56.7844	-56.925
	-0.6	2.5	-61.8656	-61.4	-60.175	-59.7313	-59.7125	-58.8594	-59.45	-60.2938	-58.6531	-60.3125	-58.5	-56.2906	-56.2188	-56.6625	-56.8	-56.95
	-0.6	2.52	-61.8625	-61.4	-60.1906	-59.7469	-59.7438	-58.9156	-59.5281	-60.3063	-58.7438	-60.35	-58.5219	-56.2938	-56.2875	-56.7125	-56.8281	-57.0344
	-0.6	2.54	-61.8219	-61.3875	-60.1594	-59.7562	-59.7844	-58.9313	-59.5375	-60.35	-58.7844	-60.3438	-58.5406	-56.4	-56.3312	-56.7406	-56.8656	-57.075
	-0.6	2.56	-61.8	-61.3875	-60.1875	-59.8	-59.7844	-58.9906	-59.5187	-60.2938	-58.8187	-60.35	-58.4781	-56.4188	-56.3281	-56.7969	-56.8937	-57.0781
	-0.6	2.58	-61.8	-61.3719	-60.1906	-59.8781	-59.7875	-59.05	-59.5344	-60.3375	-58.8719	-60.3781	-58.6219	-56.425	-56.3656	-56.8219	-56.8937	-57.1094
	-0.6	2.6	-61.775	-61.3688	-60.2625	-59.8937	-59.8406	-59.0312	-59.5531	-60.3688	-58.9031	-60.4	-58.6312	-56.4594	-56.375	-56.8344	-56.9719	-57.1094
	-0.6	2.62	-61.7438	-61.3438	-60.2781	-59.9562	-59.8969	-59	-59.5781	-60.4156	-58.9281	-60.4156	-58.65	-56.5062	-56.4062	-56.9	-57	-57.0906
	-0.6	2.64	-61.7406	-61.275	-60.2812	-59.95	-59.9	-59.0844	-59.6125	-60.3906	-58.9719	-60.4375	-58.6469	-56.525	-56.4281	-56.8906	-56.9906	-57.1562
	-0.6	2.66	-61.7094	-61.2844	-60.3438	-60	-59.9375	-59.0969	-59.6813	-60.45	-59.0156	-60.4656	-58.6813	-56.5656	-56.4719	-56.8875	-57.0375	-57.1875
	-0.6	2.68	-61.6813	-61.2969	-60.4	-60.0719	-59.95	-59.0938	-59.7344	-60.4531	-59.0438	-60.4406	-58.7188	-56.5875	-56.5156	-56.8937	-57.0625	-57.2125
	-0.6	2.7	-61.65	-61.2531	-60.3906	-60.0594	-59.9625	-59.1375	-59.7375	-60.4437	-59.1063	-60.4625	-58.6656	-56.6031	-56.5406	-56.8875	-57.0438	-57.1937
	-0.6	2.72	-61.6312	-61.2656	-60.4125	-60.0906	-59.95	-59.2219	-59.7313	-60.45	-59.1	-60.4969	-58.75	-56.6844	-56.5406	-56.925	-57.0875	-57.15
	-0.6	2.74	-61.6156	-61.2438	-60.4469	-60.0938	-59.9688	-59.2562	-59.8156	-60.4594	-59.1656	-60.5438	-58.7687	-56.6813	-56.6	-56.9281	-57.0656	-57.1875
	-0.6	2.76	-61.5938	-61.2438	-60.5094	-60.1188	-60.0187	-59.2844	-59.8344	-60.45	-59.1625	-60.5156	-58.8063	-56.7	-56.5906	-56.95	-57.1031	-57.2812
	-0.6	2.78	-61.5969	-61.2	-60.5	-60.1344	-59.975	-59.3	-59.8625	-60.475	-59.2125	-60.525	-58.85	-56.7469	-56.5938	-57.0438	-57.1	-57.2812
	-0.6	2.8	-61.55	-61.1656	-60.45	-60.1844	-59.9875	-59.2812	-59.8781	-60.4594	-59.2	-60.5375	-58.8187	-56.7656	-56.6125	-57.0563	-57.0938	-57.2469
	-0.6	2.82	-61.4875	-61.1219	-60.5125	-60.2094	-60.0281	-59.3	-59.9469	-60.4688	-59.2687	-60.525	-58.8187	-56.7938	-56.6219	-57.0875	-57.15	-57.3031
	-0.6	2.84	-61.4938	-61.1063	-60.5531	-60.225	-59.9969	-59.3375	-59.9375	-60.4938	-59.3375	-60.5375	-58.8344	-56.825	-56.7062	-57.075	-57.175	-57.2969
	-0.6	2.86	-61.4562	-61.1031	-60.6281	-60.225	-59.9781	-59.4188	-59.95	-60.5781	-59.3719	-60.5563	-58.8438	-56.875	-56.7156	-57.05	-57.2	-57.3219
	-0.6	2.88	-61.4406	-61.1125	-60.5844	-60.2438	-60.0281	-59.4875	-60.0062	-60.6	-59.4188	-60.55	-58.8438	-56.8719	-56.7469	-57.0625	-57.225	-57.3063
	-0.6	2.9	-61.4062	-61.1	-60.6063	-60.2438	-60	-59.4813	-59.975	-60.6188	-59.4594	-60.5438	-58.8281	-56.9125	-56.8	-57.1	-57.2344	-57.3563
	-0.6	2.92	-61.4625	-61.0938	-60.6281	-60.3063	-60.0563	-59.4969	-59.9813	-60.6344	-59.4531	-60.5938	-58.85	-56.9	-56.8	-57.1	-57.2594	-57.35
	-0.6	2.94	-61.4594	-61.0812	-60.5625	-60.35	-60.0844	-59.4469	-60.0625	-60.6156	-59.5	-60.6219	-58.8531	-56.9437	-56.7625	-57.0875	-57.2438	-57.4156
	-0.6	2.96	-61.3844	-61.0375	-60.5844	-60.3406	-60.0906	-59.4844	-60.05	-60.6031	-59.4813	-60.6375	-58.9	-56.95	-56.8219	-57.1625	-57.25	-57.4188
	-0.6	2.98	-61.3906	-61	-60.6188	-60.3594	-60.1344	-59.4875	-60.0344	-60.6125	-59.5125	-60.6406	-58.8937	-56.9469	-56.8406	-57.1719	-57.25	-57.4281
	-0.6	3	-61.3906	-60.9938	-60.6344	-60.3937	-60.1437	-59.5438	-60.1469	-60.6	-59.5125	-60.6875	-58.8719	-56.9406	-56.9125	-57.1688	-57.2656	-57.5
	-0.6	3.02	-61.35	-60.9875	-60.6219	-60.4469	-60.125	-59.5844	-60.15	-60.6312	-59.5594	-60.7062	-58.9313	-56.9469	-56.9344	-57.2156	-57.2375	-57.4781
	-0.6	3.04	-61.3281	-60.9844	-60.6375	-60.4844	-60.1188	-59.6406	-60.1844	-60.625	-59.5844	-60.7281	-58.9219	-56.9938	-56.9188	-57.2531	-57.25	-57.425
	-0.6	3.06	-61.2625	-60.9469	-60.6312	-60.4562	-60.1281	-59.65	-60.2031	-60.65	-59.65	-60.7344	-58.925	-56.9969	-56.9281	-57.2531	-57.2375	-57.4375
	-0.6	3.08	-61.3	-60.9281	-60.6562	-60.4375	-60.1562	-59.6562	-60.1813	-60.6188	-59.6656	-60.7375	-58.9594	-57.0563	-56.9813	-57.2156	-57.2906	-57.4375
	-0.6	3.1	-61.2562	-60.9	-60.6312	-60.4781	-60.225	-59.625	-60.2719	-60.6406	-59.6562	-60.7531	-58.9938	-57.0812	-57.0187	-57.2531	-57.3094	-57.4781
	-0.6	3.12	-61.2219	-60.8969	-60.6937	-60.475	-60.2313	-59.7031	-60.325	-60.6469	-59.7188	-60.8	-58.9906	-57.1375	-56.9781	-57.2812	-57.3	-57.4938
	-0.6	3.14	-61.2094	-60.8906	-60.7656	-60.4625	-60.2188	-59.6875	-60.2906	-60.6875	-59.6562	-60.85	-58.9844	-57.1375	-57.05	-57.2812	-57.3	-57.4562
	-0.6	3.16	-61.1875	-60.8781	-60.7906	-60.4875	-60.2344	-59.6937	-60.325	-60.6813	-59.6719	-60.8375	-59.0375	-57.15	-57.05	-57.3125	-57.2875	-57.4594
	-0.6	3.18	-61.1656	-60.9219	-60.7188	-60.4781	-60.2406	-59.6688	-60.2969	-60.7188	-59.7094	-60.8219	-59.0062	-57.15	-57.0781	-57.3156	-57.3281	-57.4719
	-0.6	3.2	-61.1156	-60.8563	-60.7562	-60.5187	-60.2906	-59.6937	-60.325	-60.7313	-59.7531	-60.8156	-58.9844	-57.2125	-57.0719	-57.3812	-57.3219	-57.4594
	-0.6	3.22	-61.1094	-60.8438	-60.7719	-60.55	-60.2938	-59.7438	-60.2938	-60.7656	-59.7687	-60.8	-59	-57.1875	-57.0625	-57.3906	-57.3406	-57.4469
	-0.6	3.24	-61.0844	-60.8219	-60.8	-60.5625	-60.2844	-59.7781	-60.35	-60.7469	-59.7844	-60.7812	-59.0219	-57.1844	-57.0687	-57.3406	-57.3594	-57.3719
	-0.6	3.26	-61.0875	-60.8312	-60.7781	-60.5062	-60.2687	-59.8125	-60.4062	-60.7469	-59.8531	-60.8219	-59.0687	-57.2188	-57.1063	-57.2844	-57.3844	-57.4938
	-0.6	3.28	-61.0563	-60.7938	-60.7438	-60.5187	-60.3063	-59.825	-60.4062	-60.7656	-59.8406	-60.8438	-59.1	-57.2719	-57.0969	-57.325	-57.4062	-57.5187
	-0.6	3.3	-61.0156	-60.7875	-60.7719	-60.6437	-60.3063	-59.8375	-60.4	-60.8125	-59.8625	-60.8281	-59.1094	-57.2875	-57.1094	-57.3625	-57.3969	-57.5469
	-0.6	3.32	-60.9375	-60.7531	-60.8344	-60.5969	-60.2812	-59.8812	-60.375	-60.8125	-59.925	-60.7875	-59.125	-57.3	-57.1375	-57.4062	-57.4	-57.5375
	-0.6	3.34	-60.9156	-60.7469	-60.7969	-60.65	-60.3219	-59.8656	-60.3969	-60.7844	-59.9094	-60.8312	-59.1375	-57.3156	-57.1344	-57.3844	-57.4156	-57.5062
	-0.6	3.36	-60.9062	-60.75	-60.7594	-60.6531	-60.3156	-59.95	-60.3969	-60.7562	-59.9219	-60.7906	-59.1375	-57.35	-57.2	-57.4437	-57.4031	-57.5687
	-0.6	3.38	-60.9	-60.6937	-60.8906	-60.5844	-60.3094	-59.9281	-60.45	-60.7906	-59.9594	-60.8281	-59.1719	-57.3375	-57.2313	-57.4844	-57.4062	-57.5
	-0.6	3.4	-60.875	-60.6844	-60.8625	-60.6937	-60.3844	-59.9375	-60.45	-60.8	-60.0438	-60.8312	-59.1625	-57.3187	-57.2062	-57.4719	-57.4375	-57.5406
	-0.6	3.42	-60.8375	-60.6469	-60.9	-60.6344	-60.4	-59.9469	-60.5	-60.8	-60	-60.8625	-59.1969	-57.3219	-57.2062	-57.4813	-57.4313	-57.5469
	-0.6	3.44	-60.8312	-60.6	-60.9437	-60.6875	-60.4031	-59.9906	-60.475	-60.8187	-60.0344	-60.8656	-59.2	-57.3812	-57.2188	-57.5344	-57.425	-57.5
	-0.6	3.46	-60.7906	-60.6437	-60.9469	-60.7188	-60.4156	-60	-60.4969	-60.8406	-60.0625	-60.8875	-59.2	-57.4062	-57.2219	-57.4969	-57.4156	-57.5906
	-0.6	3.48	-60.7875	-60.6031	-60.9656	-60.7	-60.4	-60.0406	-60.55	-60.8937	-60.0625	-60.8812	-59.1969	-57.3656	-57.2687	-57.5281	-57.4	-57.5781
	-0.6	3.5	-60.7906	-60.6	-60.9188	-60.7375	-60.4625	-60.0438	-60.5625	-60.8594	-60.025	-60.8688	-59.2281	-57.3937	-57.2531	-57.5062	-57.4	-57.5656
	-0.6	3.52	-60.75	-60.6125	-60.9062	-60.7531	-60.4188	-60.0094	-60.5938	-60.8688	-60.0687	-60.8969	-59.2562	-57.4562	-57.2	-57.5438	-57.4	-57.5812
	-0.6	3.54	-60.7	-60.55	-60.9188	-60.7812	-60.4094	-60.05	-60.6094	-60.9	-60.1125	-60.8969	-59.3156	-57.4594	-57.2281	-57.5281	-57.4188	-57.6094
	-0.6	3.56	-60.6813	-60.5094	-60.9281	-60.7687	-60.4313	-60.0656	-60.6219	-60.9031	-60.1094	-60.8781	-59.3219	-57.4219	-57.225	-57.5156	-57.3781	-57.625
	-0.6	3.58	-60.7	-60.5094	-60.9	-60.7625	-60.4562	-60.0812	-60.6094	-60.9406	-60.1437	-60.8937	-59.3187	-57.4656	-57.275	-57.4813	-57.4781	-57.6
	-0.6	3.6	-60.6375	-60.5219	-60.8937	-60.7656	-60.4469	-60.0969	-60.5844	-60.8719	-60.1844	-60.8969	-59.3	-57.475	-57.3094	-57.475	-57.45	-57.6437
	-0.6	3.62	-60.625	-60.5156	-60.9281	-60.75	-60.4844	-60.125	-60.6094	-60.8812	-60.2	-60.925	-59.3156	-57.4562	-57.2969	-57.4969	-57.4781	-57.6219
	-0.6	3.64	-60.5906	-60.5094	-60.9281	-60.825	-60.4688	-60.1688	-60.5844	-60.9031	-60.2156	-60.8875	-59.3281	-57.4875	-57.3344	-57.5125	-57.4437	-57.6781
	-0.6	3.66	-60.6	-60.4375	-60.9344	-60.7531	-60.5156	-60.2188	-60.6	-60.9094	-60.2125	-60.9	-59.3344	-57.4719	-57.3844	-57.5375	-57.5031	-57.6781
	-0.6	3.68	-60.5531	-60.45	-60.9938	-60.7	-60.5344	-60.2156	-60.6063	-60.8844	-60.2344	-60.8875	-59.3781	-57.4844	-57.3625	-57.5469	-57.525	-57.6312
	-0.6	3.7	-60.5594	-60.4156	-60.9688	-60.7094	-60.5187	-60.2562	-60.6531	-60.9062	-60.2469	-60.9313	-59.35	-57.525	-57.4406	-57.5312	-57.5125	-57.6437
	-0.6	3.72	-60.5687	-60.4219	-61.05	-60.7812	-60.5531	-60.2656	-60.6813	-60.9	-60.275	-60.9437	-59.3844	-57.55	-57.4437	-57.5469	-57.5312	-57.6844
	-0.6	3.74	-60.5094	-60.3875	-61.05	-60.7906	-60.6375	-60.2562	-60.725	-60.9281	-60.275	-60.9406	-59.3719	-57.5531	-57.3781	-57.5312	-57.5281	-57.6531
	-0.6	3.76	-60.5281	-60.3625	-61.0187	-60.75	-60.6	-60.25	-60.7438	-60.9813	-60.2625	-60.9469	-59.35	-57.5531	-57.4469	-57.5563	-57.5687	-57.6531
	-0.6	3.78	-60.5094	-60.3531	-61.0312	-60.8	-60.5875	-60.2625	-60.7687	-60.9813	-60.25	-60.9406	-59.3625	-57.5594	-57.4188	-57.5781	-57.5844	-57.6594
	-0.6	3.8	-60.4969	-60.3125	-61.0062	-60.8	-60.625	-60.3063	-60.7594	-60.9688	-60.3	-60.95	-59.3656	-57.5938	-57.4406	-57.55	-57.6	-57.6688
	-0.6	3.82	-60.4594	-60.2812	-61.0281	-60.8375	-60.6375	-60.3125	-60.8	-60.9031	-60.3031	-60.9406	-59.35	-57.6312	-57.4406	-57.5531	-57.6	-57.6531
	-0.6	3.84	-60.4406	-60.2313	-61.0656	-60.8406	-60.6219	-60.325	-60.7969	-60.9156	-60.3281	-60.9437	-59.35	-57.6219	-57.4188	-57.5438	-57.6063	-57.6813
	-0.6	3.86	-60.4281	-60.2687	-61.0594	-60.8375	-60.65	-60.3469	-60.7938	-60.9781	-60.3375	-60.9375	-59.3688	-57.625	-57.4594	-57.5687	-57.6031	-57.7
	-0.6	3.88	-60.4125	-60.2469	-61.0406	-60.8344	-60.6312	-60.3594	-60.7719	-60.9719	-60.3688	-60.9781	-59.4031	-57.6375	-57.45	-57.6	-57.6281	-57.65
	-0.6	3.9	-60.3969	-60.2031	-61	-60.9031	-60.6344	-60.375	-60.8156	-60.95	-60.4375	-60.9781	-59.4	-57.6719	-57.4844	-57.5906	-57.6344	-57.6469
	-0.6	3.92	-60.3688	-60.2281	-61.0031	-60.8875	-60.6844	-60.3688	-60.8563	-60.9437	-60.4375	-61.025	-59.4188	-57.6969	-57.4969	-57.6094	-57.6344	-57.6531
	-0.6	3.94	-60.3812	-60.2094	-61.05	-60.8875	-60.7	-60.35	-60.8625	-60.9594	-60.4688	-60.9938	-59.4406	-57.6531	-57.55	-57.5719	-57.6281	-57.6625
	-0.6	3.96	-60.35	-60.1688	-61.0406	-60.8563	-60.6375	-60.3781	-60.8312	-61	-60.4625	-61.0469	-59.4156	-57.7094	-57.5062	-57.6469	-57.6375	-57.6375
	-0.6	3.98	-60.3594	-60.1531	-61.025	-60.7938	-60.6781	-60.3469	-60.9219	-61.0031	-60.4344	-61.0469	-59.4656	-57.7188	-57.4938	-57.6469	-57.6688	-57.6625
	-0.6	4	-60.3688	-60.1344	-61.0406	-60.8312	-60.6813	-60.3656	-60.8406	-60.9656	-60.4781	-61	-59.4469	-57.7906	-57.5125	-57.6594	-57.6063	-57.6937
	-0.6	4.02	-60.325	-60.1594	-60.9562	-60.8563	-60.7	-60.375	-60.8656	-60.9688	-60.4562	-61.05	-59.4562	-57.7938	-57.4844	-57.6344	-57.6562	-57.75
	-0.6	4.04	-60.3281	-60.125	-61.0094	-60.8406	-60.7094	-60.4156	-60.8594	-60.9469	-60.45	-61.0438	-59.4656	-57.775	-57.425	-57.7094	-57.7	-57.7469
	-0.6	4.06	-60.2687	-60.1281	-61	-60.8656	-60.7531	-60.4813	-60.8656	-60.9844	-60.45	-61	-59.4625	-57.7562	-57.4844	-57.7188	-57.7	-57.7219
	-0.6	4.08	-60.2719	-60.0938	-61.0094	-60.8281	-60.7031	-60.4594	-60.8625	-61	-60.5094	-61.0219	-59.4437	-57.7125	-57.5156	-57.7125	-57.7406	-57.7562
	-0.6	4.1	-60.2344	-60.0812	-60.9781	-60.85	-60.7125	-60.4844	-60.9156	-61.0156	-60.4781	-60.9656	-59.4406	-57.725	-57.4656	-57.7625	-57.7594	-57.7594
	-0.6	4.12	-60.2344	-60.0906	-61.0125	-60.85	-60.6937	-60.4813	-60.8875	-60.9875	-60.5125	-61.0219	-59.4406	-57.7469	-57.55	-57.7406	-57.7625	-57.8156
	-0.6	4.14	-60.2562	-60.0875	-61.0438	-60.8344	-60.7	-60.5125	-60.8969	-60.9656	-60.5125	-61.0438	-59.4938	-57.7906	-57.5469	-57.7031	-57.7531	-57.8094
	-0.6	4.16	-60.2219	-60.0594	-61.0344	-60.8594	-60.7375	-60.5375	-60.8812	-60.9875	-60.5531	-61.0125	-59.525	-57.7875	-57.525	-57.6688	-57.75	-57.8125
	-0.6	4.18	-60.2	-60.0594	-61.0687	-60.8937	-60.75	-60.5062	-60.95	-60.9938	-60.5656	-61	-59.5312	-57.8031	-57.525	-57.6937	-57.7594	-57.8187
	-0.6	4.2	-60.2156	-60.0563	-61.0938	-60.8969	-60.7469	-60.4875	-60.9281	-60.9875	-60.5594	-61.0125	-59.5	-57.875	-57.5	-57.75	-57.8	-57.7938
	-0.6	4.22	-60.1844	-60.0875	-61.0187	-60.8937	-60.7625	-60.5125	-60.9219	-60.95	-60.5625	-61.0125	-59.5	-57.9	-57.5438	-57.825	-57.8031	-57.8344
	-0.6	4.24	-60.175	-60.0438	-61.075	-60.8594	-60.7469	-60.5531	-60.9844	-60.9969	-60.5531	-60.9969	-59.5062	-57.9062	-57.5594	-57.7844	-57.7344	-57.8406
	-0.6	4.26	-60.1406	-60.025	-61.05	-60.8937	-60.8187	-60.5594	-60.9594	-61.0062	-60.575	-61.0187	-59.5594	-57.9281	-57.55	-57.8187	-57.7469	-57.8312
	-0.6	4.28	-60.1094	-60	-61.0938	-60.9406	-60.8312	-60.5312	-60.9313	-60.9844	-60.5781	-61.05	-59.5969	-57.8906	-57.6094	-57.7938	-57.7562	-57.85
	-0.6	4.3	-60.1406	-60.0125	-61.0531	-60.9437	-60.8594	-60.5344	-60.9594	-60.9813	-60.6125	-61.0563	-59.5812	-57.9156	-57.625	-57.7562	-57.8063	-57.9156
	-0.6	4.32	-60.1312	-60	-61.05	-61.0062	-60.8281	-60.5219	-60.9281	-60.9531	-60.5656	-61.0875	-59.5656	-57.9	-57.5219	-57.7531	-57.8	-57.8812
	-0.6	4.34	-60.1031	-59.9875	-61.0531	-60.9875	-60.7938	-60.4906	-60.9344	-61.0031	-60.5844	-61.0687	-59.55	-57.9406	-57.6156	-57.7844	-57.7875	-57.7812
	-0.6	4.36	-60.0969	-59.9313	-61.0812	-60.9531	-60.8281	-60.5094	-60.9562	-60.9906	-60.5969	-61.0687	-59.5469	-57.9344	-57.55	-57.7375	-57.8594	-57.8312
	-0.6	4.38	-60.0719	-59.925	-61.125	-60.9437	-60.9344	-60.5438	-60.8844	-61.0344	-60.6219	-61.0875	-59.5781	-57.9375	-57.55	-57.75	-57.8625	-57.8375
	-0.6	4.4	-60.0656	-59.9688	-61.1031	-60.9437	-60.8937	-60.5906	-60.9437	-61.0875	-60.6125	-61.0375	-59.5906	-57.9062	-57.575	-57.7687	-57.85	-57.825
	-0.6	4.42	-60.0875	-59.95	-61.1344	-60.9406	-60.9281	-60.5469	-60.9469	-61.0375	-60.65	-61.0219	-59.5938	-57.9313	-57.6	-57.7219	-57.8375	-57.8344
	-0.6	4.44	-60.0156	-59.9531	-61.1156	-60.9813	-60.8688	-60.5531	-60.95	-61.025	-60.7	-61.075	-59.6469	-57.9313	-57.6344	-57.7594	-57.8438	-57.8312
	-0.6	4.46	-60.0219	-59.9437	-61.125	-60.9813	-60.9031	-60.5969	-60.9875	-60.9969	-60.6781	-61.0906	-59.625	-58	-57.6312	-57.7344	-57.8406	-57.8187
	-0.6	4.48	-60.0156	-59.9219	-61.1375	-60.9906	-60.9281	-60.575	-61.0094	-61	-60.6813	-61.0938	-59.5781	-58.0031	-57.675	-57.7	-57.85	-57.775
	-0.6	4.5	-60.0531	-59.9188	-61.1344	-60.9969	-60.8875	-60.6969	-61.0156	-60.9719	-60.675	-61.1063	-59.6188	-58.0219	-57.65	-57.7469	-57.85	-57.8406
	-0.6	4.52	-60.0125	-59.9062	-61.1625	-60.9688	-60.9406	-60.7	-60.9906	-61.0062	-60.6719	-61.1312	-59.55	-57.9813	-57.6562	-57.7406	-57.8719	-57.85
	-0.6	4.54	-59.9875	-59.8812	-61.1437	-60.9594	-60.9094	-60.7406	-61.0438	-61.05	-60.6719	-61.1281	-59.5406	-58.0125	-57.6562	-57.75	-57.8688	-57.8375
	-0.6	4.56	-59.9906	-59.9	-61.1531	-60.9656	-60.8719	-60.7156	-61.05	-61.0281	-60.7094	-61.1625	-59.5625	-58.05	-57.6688	-57.7562	-57.9219	-57.8281
	-0.6	4.58	-59.9594	-59.9188	-61.1312	-61.0125	-60.8906	-60.7156	-61.0469	-61.0438	-60.6844	-61.15	-59.5656	-58.0656	-57.725	-57.7906	-57.9344	-57.8406
	-0.6	4.6	-59.9437	-59.9219	-61.1562	-60.9875	-60.9	-60.7031	-61.0594	-61.0438	-60.725	-61.15	-59.5594	-58.0625	-57.75	-57.7938	-57.9219	-57.8531
	-0.6	4.62	-59.9	-59.825	-61.1719	-60.9688	-60.9531	-60.7125	-61.075	-61.05	-60.7281	-61.15	-59.55	-58.0781	-57.7094	-57.8281	-57.9	-57.9094
	-0.6	4.64	-59.8969	-59.8344	-61.1781	-60.9938	-60.9219	-60.7219	-61.0844	-61.0656	-60.7219	-61.1219	-59.55	-58.0812	-57.7219	-57.8219	-57.8906	-57.875
	-0.6	4.66	-59.9	-59.8	-61.1813	-61.0375	-60.8937	-60.6813	-61.0844	-61.1063	-60.75	-61.1125	-59.5406	-58.1031	-57.7406	-57.8	-57.8906	-57.9219
	-0.6	4.68	-59.9375	-59.825	-61.1469	-61	-60.9	-60.7313	-61.1063	-61.1406	-60.7594	-61.1	-59.6094	-58.0781	-57.7	-57.8281	-57.8969	-57.8719
	-0.6	4.7	-59.8937	-59.8281	-61.1531	-61.0563	-60.9	-60.7469	-61.15	-61.1281	-60.8	-61.0906	-59.5938	-58.1	-57.7094	-57.8281	-57.9281	-57.8531
	-0.6	4.72	-59.8844	-59.7625	-61.1844	-60.9938	-60.9125	-60.7812	-61.1125	-61.075	-60.7969	-61.1	-59.5281	-58.1375	-57.7562	-57.8438	-57.9281	-57.8812
	-0.6	4.74	-59.85	-59.8094	-61.1719	-60.9688	-60.9156	-60.8563	-61.0969	-61.1094	-60.8	-61.15	-59.45	-58.0969	-57.7719	-57.8563	-57.9531	-57.8969
	-0.6	4.76	-59.8844	-59.8187	-61.15	-61.025	-60.95	-60.8438	-61.1188	-61.1	-60.8	-61.1813	-59.4938	-58.0812	-57.7562	-57.8219	-57.9719	-57.9156
	-0.6	4.78	-59.8844	-59.7812	-61.2188	-61.0062	-60.9375	-60.825	-61.1094	-61.0844	-60.8281	-61.1437	-59.4844	-58.0625	-57.7906	-57.8688	-57.925	-57.8937
	-0.6	4.8	-59.8187	-59.8312	-61.2156	-60.9688	-60.9344	-60.8125	-61.1281	-61.0969	-60.825	-61.125	-59.5438	-58.0563	-57.7875	-57.8844	-57.925	-57.9188
	-0.6	4.82	-59.8344	-59.8312	-61.2375	-60.9969	-60.95	-60.8063	-61.1219	-61.1469	-60.8	-61.15	-59.5219	-58.0781	-57.7687	-57.85	-57.9125	-57.8781
	-0.6	4.84	-59.8469	-59.7781	-61.2219	-61.0062	-60.9656	-60.825	-61.1219	-61.125	-60.8375	-61.1562	-59.5406	-58.0844	-57.7844	-57.875	-57.9313	-57.8719
	-0.6	4.86	-59.8156	-59.7844	-61.2469	-61.0062	-60.9562	-60.8531	-61.1094	-61.1437	-60.8438	-61.1625	-59.5656	-58.1094	-57.7625	-57.8937	-57.9062	-57.9094
	-0.6	4.88	-59.8344	-59.7719	-61.2406	-61.0062	-60.9469	-60.7969	-61.15	-61.1688	-60.8	-61.1719	-59.575	-58.1219	-57.7812	-57.8875	-57.9406	-57.9219
	-0.6	4.9	-59.8531	-59.75	-61.2188	-60.9938	-60.9719	-60.825	-61.15	-61.1188	-60.8	-61.1969	-59.5969	-58.0906	-57.8125	-57.8688	-57.9781	-57.9
	-0.6	4.92	-59.8375	-59.7219	-61.2406	-61.0406	-60.9281	-60.8469	-61.1625	-61.0625	-60.8063	-61.175	-59.5187	-58.1188	-57.8156	-57.8063	-58.0312	-57.9
	-0.6	4.94	-59.825	-59.7094	-61.1875	-61.0375	-60.95	-60.8719	-61.1469	-61.1	-60.8	-61.2188	-59.5469	-58.1063	-57.8	-57.8281	-58.0062	-57.9219
	-0.6	4.96	-59.8187	-59.7125	-61.1875	-61.0781	-60.9813	-60.8594	-61.1063	-61.1375	-60.8	-61.1844	-59.5156	-58.1219	-57.7844	-57.8563	-58.0406	-57.8937
	-0.6	4.98	-59.7938	-59.7125	-61.2156	-61.0312	-61.0156	-60.9062	-61.1125	-61.1	-60.825	-61.2219	-59.5312	-58.1281	-57.7625	-57.8781	-58.0438	-57.9031
	-0.5	0	-60.9188	-60.8125	-60.6406	-60.9062	-60.7562	-61.0094	-60.9313	-61.0687	-57.8438	-58.0219	-57.8469	-57.5563	-57.8219
	-0.5	0.02	-60.9062	-60.8	-60.6344	-60.9344	-60.7875	-61.0031	-60.9844	-61.0625	-57.9	-57.9969	-57.8844	-57.5844	-57.7938
	-0.5	0.04	-60.8969	-60.8	-60.6188	-60.9344	-60.7313	-61.05	-60.9625	-61.0656	-57.8688	-58.0531	-57.8469	-57.6188	-57.8219
	-0.5	0.06	-61.8219	-61.7156	-61.5906	-61.8937	-61.5969	-61.8812	-61.8438	-61.9938	-58.7938	-58.9437	-58.7562	-58.5187	-58.7
	-0.5	0.08	-59.8438	-59.7125	-59.5625	-59.8844	-59.7219	-60.05	-60.0187	-60.1281	-56.9594	-57.0938	-56.9375	-56.6813	-56.8375
	-0.5	0.1	-46.2906	-46.1188	-45.9875	-46.3406	-46.8094	-47.125	-47.1	-47.175	-44.025	-44.075	-43.9469	-43.6562	-43.8719
	-0.5	0.12	-44.5344	-44.3781	-44.25	-44.6156	-45.1656	-45.4938	-45.4875	-45.5625	-42.3625	-42.425	-42.3063	-42.0031	-42.2188
	-0.5	0.14	-47.5844	-47.4406	-47.2656	-47.6	-47.7375	-48	-47.9813	-48.15	-44.9406	-44.9938	-44.9188	-44.5844	-44.7562
	-0.5	0.16	-50.5906	-50.45	-50.25	-50.5469	-50.4406	-50.7188	-50.6875	-50.8438	-47.6125	-47.7125	-47.6	-47.3	-47.4594
	-0.5	0.18	-53.0875	-52.95	-52.7469	-53.0719	-52.7781	-53.0344	-53.0281	-53.1031	-49.9	-50.0406	-49.8406	-49.6344	-49.85
	-0.5	0.2	-55.0094	-54.9062	-54.7156	-55.0531	-54.6063	-54.8844	-54.9313	-55.0125	-51.7875	-51.8719	-51.7812	-51.5219	-51.7156
	-0.5	0.22	-56.4219	-56.3937	-56.15	-56.4938	-56.0187	-56.2562	-56.3312	-56.45	-53.2062	-53.275	-53.1125	-52.9875	-53.125
	-0.5	0.24	-57.5187	-57.4313	-57.1969	-57.5094	-57.1312	-57.3156	-57.3969	-57.475	-54.275	-54.3875	-54.1625	-53.9813	-54.1625
	-0.5	0.26	-58.2687	-58.1688	-57.95	-58.2875	-57.8906	-58.0719	-58.1625	-58.2313	-55.0062	-55.1156	-54.9625	-54.7469	-54.975
	-0.5	0.28	-58.7844	-58.7156	-58.4625	-58.8469	-58.4344	-58.65	-58.7625	-58.7531	-55.6	-55.7	-55.55	-55.2594	-55.5156
	-0.5	0.3	-59.15	-59.0938	-58.8438	-59.2313	-58.8438	-59.05	-59.1375	-59.1625	-55.9969	-56.15	-55.9688	-55.6562	-55.9188
	-0.5	0.32	-59.4938	-59.3281	-59.1656	-59.5438	-59.2125	-59.3531	-59.4406	-59.5344	-56.3031	-56.4344	-56.2625	-55.95	-56.1937
	-0.5	0.34	-59.7156	-59.5656	-59.3688	-59.7313	-59.4062	-59.5594	-59.7125	-59.7562	-56.55	-56.6469	-56.5062	-56.1937	-56.475
	-0.5	0.36	-59.7438	-59.6156	-59.3969	-59.6813	-59.425	-59.6188	-59.7687	-59.8187	-56.5812	-56.6437	-56.5281	-56.2375	-56.525
	-0.5	0.38	-59.7438	-59.6	-59.4094	-59.6969	-59.45	-59.6312	-59.7625	-59.8594	-56.55	-56.6312	-56.525	-56.25	-56.4813
	-0.5	0.4	-59.6813	-59.6562	-59.3844	-59.6937	-59.3688	-59.5406	-59.675	-59.7625	-56.4938	-56.6125	-56.45	-56.1844	-56.4125
	-0.5	0.42	-59.5656	-59.5312	-59.3125	-59.6188	-59.2156	-59.35	-59.5094	-59.5344	-56.3469	-56.3937	-56.2344	-56.0656	-56.2031
	-0.5	0.44	-59.3688	-59.3375	-59.0563	-59.425	-58.95	-59.075	-59.2188	-59.275	-56.0406	-56.1063	-55.975	-55.7687	-55.8969
	-0.5	0.46	-59.0969	-59.0094	-58.7594	-59.1375	-58.5594	-58.7	-58.7812	-58.875	-55.6656	-55.7562	-55.6219	-55.3844	-55.575
	-0.5	0.48	-58.65	-58.65	-58.4094	-58.7281	-58.1375	-58.2	-58.3375	-58.4969	-55.1688	-55.3063	-55.1	-54.9	-55.0969
	-0.5	0.5	-58.1656	-58.1688	-57.9406	-58.1906	-57.6094	-57.6437	-57.8469	-57.9125	-54.5969	-54.7844	-54.5875	-54.3531	-54.5563
	-0.5	0.52	-57.6125	-57.6063	-57.3719	-57.6281	-57.0375	-57	-57.2125	-57.3125	-54.0344	-54.1531	-53.9938	-53.7594	-53.9531
	-0.5	0.54	-56.9625	-57	-56.7875	-57.0812	-56.4188	-56.3625	-56.5875	-56.725	-53.3844	-53.5094	-53.3688	-53.1156	-53.2875
	-0.5	0.56	-56.3312	-56.3094	-56.1	-56.3563	-55.75	-55.7	-55.95	-56.0875	-52.7219	-52.8531	-52.725	-52.4656	-52.7
	-0.5	0.58	-55.6188	-55.5844	-55.4219	-55.6562	-55.0187	-55.0094	-55.2594	-55.3719	-52.0281	-52.2281	-52.05	-51.8438	-52.0406
	-0.5	0.6	-54.9531	-54.9625	-54.7562	-54.9875	-54.3688	-54.3719	-54.6156	-54.7031	-51.3969	-51.5687	-51.3531	-51.1437	-51.3719
	-0.5	0.62	-54.2781	-54.2812	-54.1	-54.3	-53.7	-53.75	-53.9938	-54.0812	-50.675	-50.9125	-50.7188	-50.45	-50.725
	-0.5	0.64	-53.5875	-53.6094	-53.3812	-53.65	-53.0312	-53.0656	-53.3594	-53.4469	-50.0219	-50.25	-50.0469	-49.7719	-50.0406
	-0.5	0.66	-52.9	-52.9719	-52.6844	-52.9406	-52.3937	-52.4437	-52.725	-52.825	-49.3656	-49.6375	-49.4125	-49.1562	-49.425
	-0.5	0.68	-52.25	-52.3219	-52.0719	-52.2562	-51.7906	-51.85	-52.15	-52.2531	-48.7656	-49.0219	-48.8312	-48.55	-48.7719
	-0.5	0.7	-51.6188	-51.675	-51.4094	-51.5938	-51.2	-51.2687	-51.6156	-51.6906	-48.1937	-48.4625	-48.2344	-47.9938	-48.1625
	-0.5	0.72	-50.9656	-51.0625	-50.8187	-50.9844	-50.675	-50.7438	-51.0938	-51.1406	-47.6281	-47.8719	-47.6906	-47.4594	-47.6406
	-0.5	0.74	-50.4062	-50.4906	-50.2219	-50.45	-50.1219	-50.2156	-50.575	-50.65	-47.0625	-47.3656	-47.1063	-46.8812	-47.075
	-0.5	0.76	-49.8812	-49.9188	-49.7062	-49.9344	-49.6312	-49.7687	-50.1344	-50.1937	-46.55	-46.8656	-46.5844	-46.3812	-46.5
	-0.5	0.78	-49.3375	-49.4562	-49.1344	-49.4375	-49.2219	-49.3563	-49.7313	-49.7594	-46.05	-46.3719	-46.0312	-45.8469	-45.9969
	-0.5	0.8	-48.8187	-49.0469	-48.6125	-48.9469	-48.7531	-49	-49.3656	-49.3969	-45.6	-45.8531	-45.5469	-45.3656	-45.5687
	-0.5	0.82	-48.3375	-48.5406	-48.0563	-48.5375	-48.3594	-48.675	-49.0844	-49.05	-45.175	-45.4125	-45.1437	-45.0031	-45.1688
	-0.5	0.84	-47.8375	-48.0563	-47.3469	-48.0469	-48.0438	-48.4156	-48.8344	-48.7812	-44.8219	-45.0219	-44.6656	-44.6688	-44.825
	-0.5	0.86	-47.1594	-47.4	-46.2406	-47.575	-47.7531	-48.2125	-48.675	-48.6813	-44.4562	-44.6437	-44.2344	-44.3688	-44.4938
	-0.5	0.88	-46.0844	-46.2406	-44.325	-46.7219	-47.4938	-48	-48.6156	-48.65	-43.9375	-44.0781	-43.85	-44.0156	-44.1312
	-0.5	0.9	-44.275	-44.4219	-41.6719	-45.2406	-47.1656	-47.9	-48.6188	-48.7219	-43.0969	-43.2313	-43.2313	-43.2125	-43.6688
	-0.5	0.92	-41.7875	-41.7906	-38.05	-43.0906	-46.525	-47.8375	-48.7	-48.9219	-41.7	-41.7469	-42.0125	-41.775	-42.7156
	-0.5	0.94	-38.5156	-38.3063	-33.0875	-40.3031	-45.3844	-47.7844	-48.8656	-49.2719	-39.6094	-39.6125	-40.1188	-39.7125	-41.1125
	-0.5	0.96	-34.1562	-33.6031	-25.6375	-36.75	-43.6	-47.6937	-49.1	-49.7406	-36.8281	-36.7687	-37.5531	-36.9688	-38.9625
	-0.5	0.98	-27.8563	-26.7344	-15.725	-31.8625	-41.2125	-47.3063	-49.3688	-50.2969	-33.3281	-33.0187	-34.2719	-33.4	-36.0812
	-0.5	1	-18.8969	-17.2875	-5.42812	-24.85	-38.3375	-46.3125	-49.7	-50.8781	-28.5094	-27.6406	-29.8031	-28.5	-32.3844
	-0.5	1.02	-8.81563	-7.13438	3.20312	-15.5188	-34.5531	-44.7375	-50.1	-51.4656	-21.4344	-19.7687	-23.2219	-21.3031	-27.2281
	-0.5	1.04	0.259375	1.65937	9.09062	-5.8125	-29.3062	-42.5312	-50.525	-52.1688	-12.4156	-10.3	-14.45	-12.1094	-19.7563
	-0.5	1.06	6.925	7.87187	11.7531	2.41563	-21.8	-39.8219	-51.0187	-52.8187	-3.375	-1.16875	-5.22813	-2.89687	-10.6469
	-0.5	1.08	10.6187	10.95	11.2875	7.98125	-12.6344	-36.4781	-51.55	-53.4562	4.1375	6.1375	2.82812	4.74375	-1.7375
	-0.5	1.1	11.2406	10.8844	8.06563	10.5688	-3.82188	-32.0906	-52.1188	-54.0594	9.17188	10.7719	8.55	9.85625	5.41875
	-0.5	1.12	9.0375	8.15	2.88125	10.15	3.17188	-25.8156	-52.6813	-54.675	11.3438	12.4406	11.4031	12.0656	10.0375
	-0.5	1.14	4.56875	3.25312	-3.67812	7.17188	7.60313	-17.1844	-53.3094	-55.275	10.8156	11.2531	11.5094	11.4344	11.8094
	-0.5	1.16	-1.41875	-2.95312	-10.9656	2.36562	9.2125	-7.80625	-53.8688	-55.8781	8.025	7.75313	9.1	8.47812	10.8875
	-0.5	1.18	-8.34375	-10.0281	-18.4719	-3.73125	8.0875	0.35	-54.45	-56.4656	3.5	2.5375	4.77812	3.7375	7.70312
	-0.5	1.2	-15.7344	-17.375	-25.575	-10.7219	4.75625	6.23125	-54.9969	-57.0187	-2.33125	-3.72187	-0.80625	-2.24062	2.84063
	-0.5	1.22	-22.9875	-24.5625	-31.9906	-17.9062	-0.153125	9.39688	-55.6	-57.5375	-8.74063	-10.5844	-7.125	-8.83438	-3.15625
	-0.5	1.24	-29.6875	-31.0375	-37.5656	-24.9188	-6.325	9.675	-56.1688	-57.9813	-15.4719	-17.5094	-13.8469	-15.6219	-9.74063
	-0.5	1.26	-35.6156	-36.7344	-42.1312	-31.2469	-13.0156	7.40625	-56.7031	-58.4344	-22	-24.0594	-20.3687	-22.1812	-16.4406
	-0.5	1.28	-40.5687	-41.5125	-45.825	-36.8281	-19.8531	3.20937	-57.1969	-58.8625	-27.95	-30.0312	-26.4469	-28.2563	-22.95
	-0.5	1.3	-44.6188	-45.3594	-48.7656	-41.5094	-26.4281	-2.51875	-57.6312	-59.2687	-33.2188	-35.1437	-31.8719	-33.475	-28.7781
	-0.5	1.32	-47.8625	-48.5	-51.0312	-45.3688	-32.3594	-9.00313	-58.1063	-59.6281	-37.7219	-39.45	-36.4656	-37.9156	-33.9062
	-0.5	1.34	-50.4281	-50.9281	-52.7125	-48.3969	-37.5625	-15.85	-58.5	-59.9938	-41.425	-42.9844	-40.35	-41.575	-38.275
	-0.5	1.36	-52.4406	-52.8719	-53.9594	-50.7875	-41.8688	-22.5781	-58.9469	-60.3656	-44.4844	-45.7781	-43.55	-44.5312	-41.8563
	-0.5	1.38	-53.9375	-54.2656	-54.8281	-52.6688	-45.45	-28.8687	-59.3187	-60.6594	-46.9	-47.9813	-46.0656	-46.9156	-44.7375
	-0.5	1.4	-55.0531	-55.35	-55.4437	-54.0719	-48.3312	-34.4188	-59.6281	-60.9437	-48.7812	-49.6156	-48.0563	-48.75	-47.0344
	-0.5	1.42	-55.8937	-56.1437	-55.9125	-55.1063	-50.675	-39.1719	-59.9844	-61.2062	-50.3	-51.0344	-49.6406	-50.1594	-48.8375
	-0.5	1.44	-56.525	-56.6969	-56.1875	-55.9188	-52.475	-43.1219	-60.275	-61.4719	-51.4562	-52.0062	-50.8719	-51.2	-50.2438
	-0.5	1.46	-56.9406	-57.1344	-56.3625	-56.4656	-53.8875	-46.2938	-60.5375	-61.6844	-52.2969	-52.7594	-51.775	-52.0125	-51.3031
	-0.5	1.48	-57.1875	-57.3781	-56.4344	-56.8375	-54.95	-48.8406	-60.7625	-61.9469	-52.925	-53.3469	-52.4531	-52.6	-52.1156
	-0.5	1.5	-57.3594	-57.525	-56.4781	-57.1281	-55.7656	-50.8781	-60.9875	-62.1	-53.45	-53.6781	-52.9656	-52.9688	-52.6969
	-0.5	1.52	-57.475	-57.6312	-56.4031	-57.3438	-56.3875	-52.4688	-61.1875	-62.2906	-53.7656	-53.9625	-53.3219	-53.2687	-53.1
	-0.5	1.54	-57.5156	-57.7156	-56.35	-57.4625	-56.8469	-53.6281	-61.4	-62.4562	-54.0062	-54.1531	-53.5719	-53.4781	-53.4406
	-0.5	1.56	-57.5406	-57.7344	-56.2875	-57.55	-57.1875	-54.5	-61.5844	-62.6188	-54.1	-54.2313	-53.7219	-53.6125	-53.6125
	-0.5	1.58	-57.4813	-57.7125	-56.2375	-57.5938	-57.4594	-55.1469	-61.7594	-62.7906	-54.2156	-54.3094	-53.8187	-53.675	-53.7594
	-0.5	1.6	-57.4813	-57.7281	-56.125	-57.6156	-57.6375	-55.625	-61.9125	-62.9781	-54.3094	-54.3438	-53.8906	-53.7438	-53.8187
	-0.5	1.62	-57.4781	-57.7344	-56.0344	-57.6312	-57.7812	-55.9969	-62.0969	-63.0687	-54.3063	-54.35	-53.9625	-53.7594	-53.8781
	-0.5	1.64	-57.4875	-57.6719	-55.9875	-57.6531	-57.8312	-56.2	-62.25	-63.1688	-54.2938	-54.3063	-53.9688	-53.7531	-53.9188
	-0.5	1.66	-57.4844	-57.65	-55.9688	-57.65	-57.9344	-56.3656	-62.3406	-63.3031	-54.2687	-54.3438	-53.9688	-53.7625	-53.95
	-0.5	1.68	-57.4938	-57.6125	-55.9188	-57.7156	-58.0156	-56.5	-62.4875	-63.3625	-54.2938	-54.3438	-53.9562	-53.7219	-53.9437
	-0.5	1.7	-57.4344	-57.6219	-55.8594	-57.6719	-58.0656	-56.5312	-62.5875	-63.4562	-54.3	-54.3312	-53.975	-53.7625	-53.9281
	-0.5	1.72	-57.4375	-57.5625	-55.8406	-57.6656	-58.0844	-56.5406	-62.6562	-63.5344	-54.2656	-54.3281	-54.0031	-53.7562	-53.925
	-0.5	1.74	-57.3906	-57.5625	-55.8	-57.6844	-58.1437	-56.5156	-62.7219	-63.65	-54.3219	-54.2844	-54.0094	-53.7438	-53.9625
	-0.5	1.76	-57.35	-57.6281	-55.7719	-57.75	-58.1375	-56.5406	-62.8375	-63.6937	-54.3344	-54.2625	-53.9969	-53.7125	-53.9531
	-0.5	1.78	-57.3312	-57.6344	-55.8063	-57.775	-58.1969	-56.4906	-62.9125	-63.6875	-54.2844	-54.2812	-53.95	-53.7313	-53.9
	-0.5	1.8	-57.35	-57.5875	-55.7687	-57.7938	-58.1875	-56.4625	-62.9813	-63.75	-54.3	-54.2938	-54.0219	-53.7188	-53.925
	-0.5	1.82	-57.35	-57.6125	-55.725	-57.8	-58.2125	-56.4594	-63.05	-63.8312	-54.3688	-54.3219	-54.0719	-53.725	-53.8688
	-0.5	1.84	-57.3844	-57.6594	-55.7844	-57.8219	-58.2625	-56.45	-63.0875	-63.9125	-54.3688	-54.3125	-54.1094	-53.7781	-53.8594
	-0.5	1.86	-57.4031	-57.6937	-55.8375	-57.9156	-58.3187	-56.4	-63.1375	-63.9562	-54.3937	-54.3344	-54.1281	-53.8156	-53.8906
	-0.5	1.88	-57.4562	-57.7562	-55.8375	-58	-58.3281	-56.3781	-63.1844	-64.0312	-54.4344	-54.3625	-54.175	-53.8438	-53.9
	-0.5	1.9	-57.45	-57.7844	-55.8594	-58.0563	-58.3125	-56.3812	-63.2719	-64.0719	-54.4813	-54.3875	-54.2031	-53.875	-53.9094
	-0.5	1.92	-57.4531	-57.8	-55.8781	-58.0594	-58.3375	-56.3594	-63.2656	-64.0656	-54.5062	-54.4313	-54.1875	-53.8688	-53.9156
	-0.5	1.94	-57.4781	-57.8344	-55.8656	-58.1375	-58.3844	-56.3688	-63.3094	-64.0781	-54.5812	-54.475	-54.2719	-53.9156	-53.9906
	-0.5	1.96	-57.5156	-57.8625	-55.875	-58.1906	-58.4688	-56.35	-63.3156	-64.15	-54.6219	-54.5438	-54.325	-53.95	-54.0187
	-0.5	1.98	-57.5812	-57.8688	-55.8937	-58.2344	-58.4688	-56.3594	-63.4	-64.1594	-54.6375	-54.6125	-54.3937	-53.9688	-54.0563
	-0.5	2	-57.5656	-57.9062	-55.9031	-58.3125	-58.4781	-56.3656	-63.425	-64.225	-54.6906	-54.6188	-54.3937	-54.0156	-54.1
	-0.5	2.02	-57.6	-57.95	-55.9437	-58.3375	-58.5656	-56.4125	-63.4469	-64.1844	-54.7781	-54.6906	-54.4688	-54.0656	-54.2
	-0.5	2.04	-57.7	-57.9719	-55.9875	-58.4219	-58.6094	-56.3906	-63.4313	-64.1781	-54.85	-54.7281	-54.4813	-54.0812	-54.2406
	-0.5	2.06	-57.7812	-58.0219	-55.9875	-58.4906	-58.5719	-56.3937	-63.4781	-64.1562	-54.8906	-54.7594	-54.5281	-54.125	-54.2969
	-0.5	2.08	-57.7969	-58.0094	-56.0625	-58.4938	-58.625	-56.4406	-63.4594	-64.15	-54.9	-54.8344	-54.5844	-54.1594	-54.3625
	-0.5	2.1	-57.8594	-58.0906	-56.125	-58.5781	-58.7281	-56.4437	-63.5125	-64.2063	-54.9531	-54.8688	-54.6688	-54.2156	-54.3625
	-0.5	2.12	-57.8844	-58.175	-56.1562	-58.6469	-58.75	-56.4938	-63.5094	-64.1969	-55.0156	-54.9406	-54.7031	-54.25	-54.4
	-0.5	2.14	-57.9719	-58.1969	-56.175	-58.6656	-58.8063	-56.6156	-63.5281	-64.1813	-55.0438	-54.9625	-54.7656	-54.3187	-54.5031
	-0.5	2.16	-58.0406	-58.225	-56.2406	-58.7188	-58.8688	-56.6	-63.55	-64.1875	-55.075	-55.0469	-54.825	-54.4031	-54.4969
	-0.5	2.18	-58.0531	-58.3031	-56.275	-58.8312	-58.8937	-56.6594	-63.5312	-64.15	-55.0812	-55.0656	-54.875	-54.4781	-54.5812
	-0.5	2.2	-58.1	-58.325	-56.4094	-58.8844	-58.95	-56.6875	-63.5344	-64.1562	-55.1156	-55.1406	-54.8969	-54.5219	-54.6688
	-0.5	2.22	-58.125	-58.375	-56.4188	-58.925	-59	-56.7781	-63.5031	-64.1844	-55.1844	-55.1969	-54.9531	-54.5625	-54.7469
	-0.5	2.24	-58.1531	-58.4125	-56.5	-58.9344	-59.0469	-56.825	-63.5031	-64.175	-55.2375	-55.2406	-55.0281	-54.625	-54.7781
	-0.5	2.26	-58.1781	-58.45	-56.5375	-58.9719	-59.0656	-56.8937	-63.5312	-64.175	-55.3	-55.2438	-55.05	-54.7	-54.7969
	-0.5	2.28	-58.2281	-58.5469	-56.5812	-59.025	-59.0563	-56.9313	-63.5	-64.1219	-55.3531	-55.2812	-55.1219	-54.7687	-54.9
	-0.5	2.3	-58.2438	-58.5781	-56.5875	-59.0687	-59.1312	-56.9906	-63.4906	-64.0938	-55.4062	-55.3594	-55.1906	-54.7969	-54.9719
	-0.5	2.32	-58.2781	-58.6625	-56.6937	-59.1625	-59.1594	-57.0125	-63.4719	-64.0969	-55.4125	-55.4219	-55.25	-54.8563	-54.9781
	-0.5	2.34	-58.2969	-58.675	-56.775	-59.2156	-59.1625	-57.0938	-63.4406	-64.0938	-55.4688	-55.45	-55.2969	-54.9031	-55.025
	-0.5	2.36	-58.3781	-58.7313	-56.8063	-59.2281	-59.2281	-57.1406	-63.4656	-64.0781	-55.5281	-55.4969	-55.3312	-54.95	-55.0687
	-0.5	2.38	-58.4188	-58.7687	-56.8187	-59.2781	-59.2781	-57.2375	-63.4562	-64.0344	-55.5812	-55.5812	-55.375	-54.9906	-55.0875
	-0.5	2.4	-58.45	-58.8	-56.8937	-59.2562	-59.2875	-57.3094	-63.475	-64.0938	-55.6156	-55.6375	-55.3875	-55.025	-55.1312
	-0.5	2.42	-58.4813	-58.85	-56.9313	-59.3156	-59.3	-57.3531	-63.4125	-64.0719	-55.6625	-55.6625	-55.4625	-55.1031	-55.15
	-0.5	2.44	-58.55	-58.8812	-57.0187	-59.3094	-59.3219	-57.3719	-63.4	-64.0594	-55.7	-55.7375	-55.5719	-55.1375	-55.2625
	-0.5	2.46	-58.6063	-58.9094	-57.0906	-59.3563	-59.4031	-57.4469	-63.4281	-64.0563	-55.7344	-55.8031	-55.5719	-55.2188	-55.2625
	-0.5	2.48	-58.6469	-58.9156	-57.1063	-59.3594	-59.4437	-57.5187	-63.3812	-64.05	-55.8063	-55.8563	-55.6094	-55.2406	-55.3125
	-0.5	2.5	-58.7	-58.95	-57.1625	-59.3875	-59.4625	-57.525	-63.4281	-64.0375	-55.8344	-55.9188	-55.6406	-55.2375	-55.3844
	-0.5	2.52	-58.7656	-59.0094	-57.2094	-59.4562	-59.4875	-57.5031	-63.3844	-64.0156	-55.8688	-55.9406	-55.6875	-55.3	-55.4719
	-0.5	2.54	-58.775	-59.0281	-57.2844	-59.4719	-59.4719	-57.6	-63.3312	-63.9688	-55.8969	-55.9594	-55.7438	-55.375	-55.4594
	-0.5	2.56	-58.7938	-59.0656	-57.3469	-59.4906	-59.5031	-57.6906	-63.3469	-63.9813	-55.9188	-55.9938	-55.7906	-55.3969	-55.5
	-0.5	2.58	-58.8375	-59.1531	-57.3688	-59.575	-59.5344	-57.7281	-63.3594	-63.9531	-55.9938	-56.0563	-55.85	-55.4625	-55.6344
	-0.5	2.6	-58.8719	-59.2125	-57.3937	-59.6219	-59.5531	-57.8187	-63.2969	-63.8969	-56.0187	-56.0969	-55.8875	-55.5344	-55.6625
	-0.5	2.62	-58.8875	-59.2406	-57.4531	-59.6562	-59.6125	-57.8438	-63.3094	-63.875	-56.0187	-56.1344	-55.9406	-55.55	-55.6781
	-0.5	2.64	-58.875	-59.2656	-57.5375	-59.6844	-59.6312	-57.8344	-63.3344	-63.8312	-56.0687	-56.1562	-55.9562	-55.5656	-55.7438
	-0.5	2.66	-58.9437	-59.2969	-57.5375	-59.6844	-59.6312	-57.9125	-63.3	-63.8406	-56.1219	-56.1937	-56	-55.5969	-55.7781
	-0.5	2.68	-58.9906	-59.3312	-57.5875	-59.7094	-59.7062	-57.975	-63.3125	-63.85	-56.1344	-56.2656	-56.0625	-55.6437	-55.8719
	-0.5	2.7	-59.025	-59.3719	-57.6375	-59.7938	-59.7094	-58.0062	-63.3	-63.85	-56.1562	-56.2594	-56.1063	-55.65	-55.925
	-0.5	2.72	-59.0781	-59.3812	-57.6406	-59.7469	-59.7438	-58.0875	-63.3	-63.8	-56.2219	-56.3156	-56.1312	-55.7156	-55.9781
	-0.5	2.74	-59.0875	-59.4344	-57.7219	-59.7406	-59.7812	-58.1312	-63.2812	-63.8	-56.2687	-56.3875	-56.175	-55.7438	-55.9469
	-0.5	2.76	-59.1719	-59.4062	-57.7562	-59.8156	-59.8	-58.1094	-63.25	-63.7469	-56.3094	-56.3937	-56.2188	-55.7812	-55.9656
	-0.5	2.78	-59.15	-59.4375	-57.8094	-59.825	-59.8156	-58.1688	-63.2469	-63.7281	-56.3656	-56.4188	-56.2656	-55.8312	-56.0125
	-0.5	2.8	-59.1781	-59.5062	-57.8594	-59.8969	-59.8	-58.1937	-63.2562	-63.7344	-56.4031	-56.4594	-56.3156	-55.8625	-56.0438
	-0.5	2.82	-59.2375	-59.5438	-57.8937	-59.9062	-59.8438	-58.2438	-63.2156	-63.6969	-56.4219	-56.5219	-56.3656	-55.95	-56.0656
	-0.5	2.84	-59.2406	-59.5625	-57.9219	-59.9	-59.825	-58.2687	-63.1875	-63.6312	-56.4437	-56.5625	-56.3656	-56	-56.1063
	-0.5	2.86	-59.3187	-59.5406	-57.9313	-59.875	-59.8875	-58.2906	-63.1531	-63.6	-56.4719	-56.5687	-56.4031	-56	-56.1469
	-0.5	2.88	-59.3	-59.5563	-58.0281	-59.9219	-59.9281	-58.3312	-63.1469	-63.5844	-56.4938	-56.6063	-56.4562	-56.025	-56.2062
	-0.5	2.9	-59.3187	-59.625	-58.1281	-59.9094	-59.9313	-58.3531	-63.1156	-63.5281	-56.5281	-56.625	-56.5312	-56.0531	-56.2
	-0.5	2.92	-59.3594	-59.5844	-58.1188	-59.9	-59.9188	-58.4156	-63.1	-63.5219	-56.6031	-56.6312	-56.4813	-56.0938	-56.2469
	-0.5	2.94	-59.425	-59.6281	-58.1312	-59.9375	-59.9531	-58.4719	-63.0719	-63.5781	-56.6	-56.6688	-56.4688	-56.1156	-56.2969
	-0.5	2.96	-59.4562	-59.6312	-58.1875	-59.8969	-60.0281	-58.5781	-63.0375	-63.5312	-56.6469	-56.75	-56.4938	-56.1688	-56.3281
	-0.5	2.98	-59.4969	-59.65	-58.2438	-59.9875	-60.0219	-58.6469	-63.05	-63.4875	-56.6562	-56.7375	-56.5	-56.1813	-56.3719
	-0.5	3	-59.4781	-59.6594	-58.3094	-60.0187	-60.0438	-58.6594	-62.9938	-63.4531	-56.7406	-56.7625	-56.5344	-56.2094	-56.3812
	-0.5	3.02	-59.5	-59.7438	-58.3094	-60.0687	-60.1	-58.65	-62.9719	-63.4562	-56.75	-56.8063	-56.6125	-56.2687	-56.4219
	-0.5	3.04	-59.5219	-59.7969	-58.3937	-60.0844	-60.0719	-58.6969	-62.975	-63.3906	-56.725	-56.8	-56.6281	-56.3	-56.425
	-0.5	3.06	-59.5406	-59.7938	-58.3969	-60.1	-60.1031	-58.725	-62.9562	-63.3688	-56.7219	-56.8438	-56.6281	-56.375	-56.5344
	-0.5	3.08	-59.5969	-59.7938	-58.3875	-60.1375	-60.1219	-58.7094	-62.9	-63.3844	-56.7406	-56.9062	-56.6344	-56.3531	-56.5156
	-0.5	3.1	-59.6188	-59.8125	-58.4375	-60.1625	-60.125	-58.7062	-62.9	-63.35	-56.7687	-56.9313	-56.6937	-56.4125	-56.4781
	-0.5	3.12	-59.65	-59.8531	-58.4938	-60.2	-60.1375	-58.7938	-62.8875	-63.2969	-56.8125	-56.9781	-56.7406	-56.4562	-56.5625
	-0.5	3.14	-59.6219	-59.8875	-58.5469	-60.2125	-60.1469	-58.8594	-62.9375	-63.2719	-56.8375	-56.95	-56.7406	-56.4906	-56.525
	-0.5	3.16	-59.6375	-59.8656	-58.5625	-60.2469	-60.175	-58.9031	-62.8937	-63.2594	-56.8875	-56.9688	-56.8	-56.525	-56.525
	-0.5	3.18	-59.6625	-59.8781	-58.5969	-60.2469	-60.1594	-58.9	-62.9	-63.2156	-56.9094	-57.0219	-56.8219	-56.575	-56.5563
	-0.5	3.2	-59.7469	-59.9313	-58.6406	-60.2375	-60.1937	-58.9469	-62.8594	-63.2	-56.9344	-57.0531	-56.8187	-56.575	-56.5594
	-0.5	3.22	-59.7375	-59.95	-58.6719	-60.2844	-60.1906	-58.9594	-62.8344	-63.175	-56.9875	-57.0563	-56.8406	-56.5594	-56.6375
	-0.5	3.24	-59.8156	-59.9625	-58.6469	-60.275	-60.2219	-59.0156	-62.7969	-63.1719	-57.0438	-57.0438	-56.8688	-56.5781	-56.6594
	-0.5	3.26	-59.8344	-59.9344	-58.75	-60.2687	-60.2781	-59.0812	-62.7562	-63.1406	-57.0344	-57.0719	-56.85	-56.6437	-56.6781
	-0.5	3.28	-59.8438	-60.0062	-58.825	-60.2969	-60.3	-59.0719	-62.7656	-63.1156	-57.0469	-57.1469	-56.8906	-56.6063	-56.7313
	-0.5	3.3	-59.8719	-59.9906	-58.8375	-60.3156	-60.3219	-59.0969	-62.725	-63.1125	-57.0719	-57.1813	-56.875	-56.6531	-56.7344
	-0.5	3.32	-59.9062	-60.0125	-58.9031	-60.3094	-60.2969	-59.1437	-62.7156	-63.0531	-57.0906	-57.1875	-56.9281	-56.6625	-56.7406
	-0.5	3.34	-59.95	-60.0219	-58.9125	-60.3125	-60.3	-59.1625	-62.6937	-63.0563	-57.1	-57.1813	-56.9094	-56.725	-56.8156
	-0.5	3.36	-59.9875	-60.0156	-58.9313	-60.2875	-60.3187	-59.225	-62.7	-63.0125	-57.1406	-57.1844	-56.9562	-56.7313	-56.8344
	-0.5	3.38	-59.9719	-59.9938	-58.9531	-60.3469	-60.35	-59.2625	-62.6719	-63.0156	-57.1688	-57.1906	-56.9688	-56.7375	-56.8563
	-0.5	3.4	-59.9844	-59.9906	-58.9562	-60.3781	-60.3312	-59.2812	-62.6437	-62.9531	-57.1281	-57.2281	-57.0219	-56.75	-56.8937
	-0.5	3.42	-59.9969	-60.025	-59	-60.3812	-60.3125	-59.325	-62.6688	-62.9437	-57.1875	-57.2531	-57.0344	-56.775	-56.8875
	-0.5	3.44	-59.9781	-60.0812	-59.0625	-60.4313	-60.3125	-59.325	-62.6437	-62.9375	-57.2188	-57.2375	-57.0375	-56.8063	-56.8875
	-0.5	3.46	-60.0375	-60.0938	-59.075	-60.4469	-60.3219	-59.3344	-62.6219	-62.9469	-57.2188	-57.275	-57.0844	-56.8438	-56.95
	-0.5	3.48	-60.0594	-60.0531	-59.1	-60.4219	-60.3781	-59.4188	-62.575	-62.8969	-57.25	-57.35	-57.0687	-56.8469	-56.9625
	-0.5	3.5	-60.0969	-60.0312	-59.1344	-60.4875	-60.3969	-59.4406	-62.5531	-62.8937	-57.2844	-57.3812	-57.0594	-56.85	-56.9562
	-0.5	3.52	-60.1	-60.0687	-59.1937	-60.4688	-60.4	-59.45	-62.5594	-62.8719	-57.2344	-57.3969	-57.0781	-56.9281	-56.9844
	-0.5	3.54	-60.1437	-60.0812	-59.2313	-60.4656	-60.4	-59.525	-62.5531	-62.8688	-57.2812	-57.425	-57.0906	-56.9813	-56.9781
	-0.5	3.56	-60.1875	-60.125	-59.2469	-60.4406	-60.4469	-59.5062	-62.5094	-62.8219	-57.3031	-57.4375	-57.1031	-56.9625	-56.9688
	-0.5	3.58	-60.2	-60.1188	-59.3	-60.4688	-60.45	-59.5187	-62.5187	-62.8156	-57.3375	-57.4437	-57.1	-57.0125	-57.05
	-0.5	3.6	-60.1875	-60.1312	-59.2969	-60.475	-60.4969	-59.55	-62.45	-62.8656	-57.3531	-57.475	-57.1188	-57.0187	-57.0563
	-0.5	3.62	-60.1375	-60.1562	-59.2781	-60.5125	-60.5031	-59.5875	-62.4625	-62.8	-57.3625	-57.4938	-57.1031	-57.0125	-57.0375
	-0.5	3.64	-60.1656	-60.1688	-59.2938	-60.5125	-60.5094	-59.575	-62.4406	-62.8375	-57.4	-57.4969	-57.0906	-57.0281	-57.0812
	-0.5	3.66	-60.2375	-60.1969	-59.3281	-60.4781	-60.5375	-59.6437	-62.4594	-62.7844	-57.3844	-57.5312	-57.1469	-57.025	-57.0969
	-0.5	3.68	-60.2812	-60.2	-59.3469	-60.5312	-60.5187	-59.675	-62.475	-62.6875	-57.4219	-57.5187	-57.1469	-57.0406	-57.0969
	-0.5	3.7	-60.3	-60.225	-59.4031	-60.5406	-60.5375	-59.6813	-62.45	-62.6594	-57.45	-57.5	-57.1937	-57.0438	-57.1531
	-0.5	3.72	-60.3438	-60.2625	-59.4125	-60.6	-60.55	-59.6937	-62.4	-62.6937	-57.475	-57.5219	-57.25	-57.0625	-57.1781
	-0.5	3.74	-60.3312	-60.2938	-59.425	-60.6219	-60.5312	-59.7438	-62.3875	-62.6656	-57.4437	-57.5438	-57.3031	-57.1	-57.1531
	-0.5	3.76	-60.3125	-60.2812	-59.4313	-60.6094	-60.5375	-59.7812	-62.4	-62.6312	-57.4688	-57.6031	-57.3	-57.1375	-57.1625
	-0.5	3.78	-60.3719	-60.3156	-59.45	-60.5938	-60.5531	-59.7938	-62.4062	-62.65	-57.4531	-57.6125	-57.2781	-57.1469	-57.1937
	-0.5	3.8	-60.3625	-60.3	-59.4938	-60.6125	-60.5938	-59.825	-62.4062	-62.6562	-57.475	-57.6125	-57.2938	-57.175	-57.15
	-0.5	3.82	-60.3844	-60.3312	-59.4719	-60.6281	-60.5875	-59.8438	-62.3219	-62.6	-57.4875	-57.5875	-57.2844	-57.1844	-57.1688
	-0.5	3.84	-60.3875	-60.3312	-59.4625	-60.6594	-60.5781	-59.8312	-62.2938	-62.5969	-57.5125	-57.6	-57.2375	-57.1844	-57.1813
	-0.5	3.86	-60.4	-60.3563	-59.5031	-60.6125	-60.575	-59.8406	-62.2781	-62.6	-57.5219	-57.6281	-57.2719	-57.1594	-57.2219
	-0.5	3.88	-60.4437	-60.3469	-59.5875	-60.5625	-60.625	-59.8594	-62.2656	-62.5812	-57.5812	-57.6594	-57.25	-57.1969	-57.2531
	-0.5	3.9	-60.4781	-60.4344	-59.5969	-60.6406	-60.6094	-59.9281	-62.2719	-62.5469	-57.6	-57.6344	-57.3125	-57.2344	-57.2625
	-0.5	3.92	-60.45	-60.4156	-59.6	-60.6312	-60.65	-59.9437	-62.2781	-62.5344	-57.6625	-57.6875	-57.325	-57.2125	-57.2719
	-0.5	3.94	-60.4719	-60.3781	-59.6531	-60.6625	-60.6375	-59.9188	-62.3094	-62.5187	-57.65	-57.6875	-57.3031	-57.25	-57.2844
	-0.5	3.96	-60.5	-60.3906	-59.6375	-60.6875	-60.6125	-59.9281	-62.2969	-62.4844	-57.6656	-57.7344	-57.3469	-57.2406	-57.2812
	-0.5	3.98	-60.5094	-60.4375	-59.6844	-60.6813	-60.65	-59.9344	-62.2281	-62.4969	-57.7406	-57.7156	-57.3219	-57.2562	-57.2844
	-0.5	4	-60.5156	-60.45	-59.7	-60.6375	-60.6719	-59.9313	-62.2062	-62.4531	-57.7375	-57.75	-57.3594	-57.2594	-57.3
	-0.5	4.02	-60.5062	-60.4625	-59.7469	-60.6813	-60.65	-59.9531	-62.2125	-62.4594	-57.7094	-57.7562	-57.3969	-57.3187	-57.3531
	-0.5	4.04	-60.5187	-60.4969	-59.8219	-60.6562	-60.6437	-59.9844	-62.1937	-62.4281	-57.7313	-57.7375	-57.4313	-57.3719	-57.3563
	-0.5	4.06	-60.575	-60.5187	-59.8312	-60.675	-60.7	-60.025	-62.1906	-62.425	-57.7031	-57.7812	-57.3656	-57.3875	-57.35
	-0.5	4.08	-60.4969	-60.5	-59.8094	-60.6437	-60.6969	-60.0687	-62.2	-62.3781	-57.675	-57.75	-57.4156	-57.3281	-57.4031
	-0.5	4.1	-60.5812	-60.5312	-59.7938	-60.6719	-60.7531	-60.0781	-62.1656	-62.3031	-57.7188	-57.75	-57.4719	-57.3187	-57.3937
	-0.5	4.12	-60.6219	-60.5031	-59.8281	-60.6188	-60.7281	-60.0781	-62.1906	-62.3187	-57.7469	-57.7812	-57.5219	-57.3625	-57.4375
	-0.5	4.14	-60.6188	-60.5187	-59.8781	-60.6219	-60.7188	-60.05	-62.1844	-62.3094	-57.7625	-57.7375	-57.55	-57.4062	-57.4219
	-0.5	4.16	-60.6125	-60.5375	-59.85	-60.6625	-60.6844	-60.0469	-62.1844	-62.2781	-57.8063	-57.7938	-57.55	-57.4	-57.4531
	-0.5	4.18	-60.6	-60.5219	-59.8969	-60.675	-60.7281	-60.1	-62.1781	-62.2562	-57.7812	-57.85	-57.5563	-57.4	-57.4688
	-0.5	4.2	-60.6688	-60.5406	-59.9437	-60.6937	-60.7594	-60.1031	-62.1	-62.2594	-57.775	-57.8875	-57.55	-57.4219	-57.5281
	-0.5	4.22	-60.7125	-60.5281	-59.9281	-60.7	-60.7594	-60.1625	-62.05	-62.2156	-57.7719	-57.9	-57.5031	-57.4375	-57.55
	-0.5	4.24	-60.7438	-60.5469	-59.9406	-60.7125	-60.7938	-60.1813	-62.1125	-62.2031	-57.7844	-57.8625	-57.5156	-57.4719	-57.5125
	-0.5	4.26	-60.6125	-60.5062	-59.9938	-60.7062	-60.7812	-60.2	-62.0719	-62.2188	-57.8375	-57.9125	-57.55	-57.4406	-57.5469
	-0.5	4.28	-60.6312	-60.5438	-60.0125	-60.7219	-60.8	-60.1813	-62.0781	-62.25	-57.85	-57.9188	-57.55	-57.4594	-57.4781
	-0.5	4.3	-60.675	-60.5875	-60.0187	-60.75	-60.7812	-60.2031	-62.0687	-62.2219	-57.8469	-57.9125	-57.5719	-57.475	-57.4938
	-0.5	4.32	-60.6625	-60.5781	-60.0594	-60.75	-60.775	-60.1688	-62.075	-62.1688	-57.8656	-57.9313	-57.575	-57.4813	-57.525
	-0.5	4.34	-60.6937	-60.625	-60.0812	-60.7906	-60.7406	-60.1688	-62.0812	-62.1625	-57.8875	-57.9031	-57.6	-57.55	-57.5312
	-0.5	4.36	-60.6969	-60.625	-60	-60.775	-60.7625	-60.1875	-62.0375	-62.1469	-57.8844	-57.9469	-57.6312	-57.5406	-57.5687
	-0.5	4.38	-60.7219	-60.6125	-60.0563	-60.7594	-60.8	-60.2	-62.0438	-62.1594	-57.8594	-57.9594	-57.6594	-57.55	-57.6
	-0.5	4.4	-60.6312	-60.6688	-60.05	-60.8719	-60.8	-60.2687	-62.0156	-62.1469	-57.8625	-57.975	-57.6031	-57.5656	-57.5969
	-0.5	4.42	-60.6688	-60.6875	-60.0719	-60.775	-60.7812	-60.2344	-62.0156	-62.1219	-57.8688	-57.9938	-57.6344	-57.6	-57.6094
	-0.5	4.44	-60.7313	-60.7062	-60.1375	-60.6937	-60.8	-60.2625	-62.0187	-62.1	-57.8719	-57.9938	-57.65	-57.6406	-57.6531
	-0.5	4.46	-60.7344	-60.7188	-60.1281	-60.7812	-60.8094	-60.275	-62.0375	-62.0781	-57.8937	-58.0281	-57.6594	-57.6406	-57.6531
	-0.5	4.48	-60.7656	-60.7625	-60.1031	-60.7438	-60.8406	-60.275	-61.9906	-62.0781	-57.85	-58.0219	-57.7	-57.6531	-57.65
	-0.5	4.5	-60.7781	-60.7313	-60.1094	-60.8187	-60.8531	-60.3344	-62.0406	-62.0563	-57.8438	-58.0906	-57.7156	-57.6469	-57.6656
	-0.5	4.52	-60.7594	-60.7687	-60.1344	-60.7906	-60.85	-60.3469	-62.05	-62.0469	-57.85	-58.0656	-57.6969	-57.6594	-57.6531
	-0.5	4.54	-60.8125	-60.7344	-60.125	-60.7875	-60.8719	-60.3281	-61.975	-62.0375	-57.8688	-58.05	-57.6719	-57.6781	-57.6594
	-0.5	4.56	-60.825	-60.7469	-60.1969	-60.8125	-60.9188	-60.35	-61.9688	-62.025	-57.9219	-58.0594	-57.6437	-57.7313	-57.65
	-0.5	4.58	-60.8	-60.7625	-60.2281	-60.7719	-60.95	-60.3469	-61.9437	-62.0469	-57.95	-58.05	-57.6594	-57.7188	-57.6562
	-0.5	4.6	-60.8	-60.7281	-60.2344	-60.7812	-60.8844	-60.375	-61.9062	-62.0062	-57.9594	-58.0563	-57.7188	-57.7062	-57.625
	-0.5	4.62	-60.8	-60.7812	-60.2344	-60.7906	-60.8781	-60.4031	-61.9469	-61.9938	-57.9344	-58.0812	-57.65	-57.7031	-57.6344
	-0.5	4.64	-60.8	-60.7812	-60.2125	-60.8	-60.875	-60.4125	-61.9062	-61.95	-57.9094	-58.0687	-57.6813	-57.7	-57.6562
	-0.5	4.66	-60.8187	-60.7906	-60.2469	-60.8	-60.8969	-60.3875	-61.9	-61.95	-57.9156	-58.1031	-57.6688	-57.6688	-57.675
	-0.5	4.68	-60.8469	-60.7625	-60.2344	-60.7719	-60.8875	-60.4281	-61.9	-61.9562	-57.9062	-58.1	-57.7125	-57.6562	-57.6844
	-0.5	4.7	-60.8719	-60.7625	-60.1969	-60.7687	-60.9125	-60.425	-61.8969	-61.9437	-57.9562	-58.0938	-57.75	-57.6937	-57.6688
	-0.5	4.72	-60.8875	-60.7906	-60.2062	-60.7062	-60.8719	-60.4219	-61.8531	-61.8906	-57.95	-58.1	-57.7781	-57.7219	-57.625
	-0.5	4.74	-60.9	-60.7906	-60.2	-60.7719	-60.8875	-60.4469	-61.8406	-61.9344	-57.9562	-58.1344	-57.7781	-57.7375	-57.65
	-0.5	4.76	-60.9219	-60.7875	-60.2313	-60.8	-60.8781	-60.4469	-61.8563	-61.9	-57.9844	-58.1281	-57.8187	-57.7687	-57.6813
	-0.5	4.78	-60.9219	-60.7812	-60.2875	-60.7969	-60.8812	-60.4688	-61.875	-61.8375	-57.9344	-58.1281	-57.7844	-57.7656	-57.7
	-0.5	4.8	-60.9281	-60.8	-60.2938	-60.7969	-60.8438	-60.55	-61.8156	-61.8781	-57.9313	-58.1375	-57.8125	-57.7313	-57.7
	-0.5	4.82	-60.9437	-60.8219	-60.3438	-60.8406	-60.8125	-60.5	-61.8656	-61.8531	-57.9625	-58.1437	-57.7469	-57.7875	-57.7344
	-0.5	4.84	-60.9219	-60.775	-60.325	-60.8219	-60.8625	-60.5469	-61.8531	-61.7875	-57.9656	-58.125	-57.7844	-57.7938	-57.7313
	-0.5	4.86	-60.9625	-60.7969	-60.3469	-60.7875	-60.8781	-60.5406	-61.8125	-61.8063	-58.025	-58.1219	-57.7781	-57.8219	-57.7469
	-0.5	4.88	-60.9375	-60.7875	-60.3812	-60.8281	-60.8875	-60.5563	-61.7875	-61.8344	-58.0563	-58.2	-57.7844	-57.825	-57.7875
	-0.5	4.9	-60.9125	-60.7969	-60.4188	-60.8219	-60.9313	-60.5375	-61.775	-61.8094	-58.0219	-58.1719	-57.8125	-57.8656	-57.8219
	-0.5	4.92	-60.9531	-60.7812	-60.4469	-60.85	-60.9344	-60.55	-61.7906	-61.8063	-58.0406	-58.1844	-57.7938	-57.8531	-57.8375
	-0.5	4.94	-60.9781	-60.8469	-60.4375	-60.8187	-60.9188	-60.5	-61.7875	-61.8	-58.05	-58.1844	-57.8031	-57.8594	-57.8312
	-0.5	4.96	-60.9875	-60.85	-60.4844	-60.8469	-60.9281	-60.5563	-61.7719	-61.75	-58.0906	-58.1688	-57.775	-57.8219	-57.8406
	-0.5	4.98	-61.0156	-60.8656	-60.5187	-60.8625	-60.9594	-60.5438	-61.7406	-61.75	-58.0906	-58.1594	-57.8156	-57.8344	-57.8406
	-0.4	8.88178e-16	-59.2625	-59.2875	-60.5375	-60.4219	-60.4156	-60.5	-60.6813	-60.425	-60.3375	-60.5438	-60.4531	-57.8281	-58.1844	-57.9469	-57.75	-57.7031
	-0.4	0.02	-59.2469	-59.2656	-60.55	-60.375	-60.425	-60.5687	-60.7125	-60.4531	-60.2875	-60.5156	-60.4844	-57.85	-58.1844	-57.9813	-57.7625	-57.7
	-0.4	0.04	-59.2625	-59.3094	-60.55	-60.3844	-60.4188	-60.5531	-60.7125	-60.4469	-60.3187	-60.5187	-60.4875	-57.8469	-58.1719	-57.9594	-57.7281	-57.7031
	-0.4	0.06	-60.0656	-60.0625	-61.5312	-61.3219	-61.35	-61.5094	-61.6219	-61.3438	-61.2438	-61.4156	-61.3312	-58.7469	-59.0687	-58.8594	-58.6312	-58.625
	-0.4	0.08	-58.1031	-58.1344	-59.5281	-59.3594	-59.3844	-59.5812	-59.6312	-59.3781	-59.2719	-59.4562	-59.3625	-56.9125	-57.2469	-57.0219	-56.8875	-56.8312
	-0.4	0.1	-45.2969	-45.3625	-45.8812	-45.7469	-45.75	-46.0094	-46.5	-46.2344	-46.15	-46.2594	-46.15	-43.9813	-44.2906	-44.1125	-43.9781	-43.8875
	-0.4	0.12	-43.7875	-43.85	-44.1469	-43.9719	-44.0281	-44.2406	-44.8438	-44.6344	-44.5375	-44.5406	-44.5062	-42.275	-42.6437	-42.4844	-42.2781	-42.2156
	-0.4	0.14	-46.3812	-46.4031	-47.1437	-47.0219	-47.0563	-47.2438	-47.525	-47.2906	-47.2	-47.3094	-47.2281	-44.8469	-45.2156	-44.9844	-44.7875	-44.75
	-0.4	0.16	-49.125	-49.2125	-50.1469	-50	-50.05	-50.1656	-50.3	-50.1219	-50.0312	-50.1437	-50.075	-47.5344	-47.825	-47.6625	-47.4625	-47.4219
	-0.4	0.18	-51.525	-51.6344	-52.6344	-52.4906	-52.5406	-52.6688	-52.7062	-52.55	-52.4531	-52.5438	-52.5031	-49.875	-50.1188	-49.9594	-49.7656	-49.7562
	-0.4	0.2	-53.475	-53.4781	-54.65	-54.4562	-54.5156	-54.6	-54.6094	-54.3844	-54.375	-54.45	-54.4062	-51.7188	-52.0156	-51.8281	-51.6688	-51.6406
	-0.4	0.22	-54.9156	-54.8844	-56.0781	-55.9469	-55.9625	-56.0781	-56.0312	-55.8469	-55.825	-55.9313	-55.8219	-53.1437	-53.4406	-53.2531	-53.075	-53.025
	-0.4	0.24	-55.9344	-55.8875	-57.1	-56.9844	-57	-57.1562	-57.075	-56.8844	-56.875	-56.9688	-56.85	-54.1625	-54.4781	-54.2781	-54.0563	-54.05
	-0.4	0.26	-56.6437	-56.5969	-57.825	-57.7438	-57.75	-57.9281	-57.8688	-57.6406	-57.5719	-57.7	-57.65	-54.9313	-55.25	-55.0563	-54.8312	-54.8063
	-0.4	0.28	-57.1125	-57.1	-58.4062	-58.3156	-58.3219	-58.4875	-58.45	-58.1875	-58.15	-58.2656	-58.2188	-55.5156	-55.7844	-55.6	-55.3531	-55.3312
	-0.4	0.3	-57.4813	-57.4875	-58.8187	-58.6688	-58.6844	-58.8844	-58.8781	-58.6625	-58.5594	-58.6594	-58.6375	-55.925	-56.2406	-56	-55.7875	-55.775
	-0.4	0.32	-57.75	-57.7687	-59.1219	-58.9344	-58.975	-59.1562	-59.2406	-58.9375	-58.8406	-58.9188	-58.9	-56.225	-56.55	-56.3063	-56.0719	-56.1
	-0.4	0.34	-57.925	-57.9125	-59.3688	-59.2188	-59.2094	-59.3563	-59.4375	-59.15	-59.1	-59.2094	-59.1188	-56.4531	-56.7469	-56.5312	-56.3219	-56.3375
	-0.4	0.36	-58.0812	-58.0594	-59.5062	-59.3625	-59.3375	-59.5125	-59.575	-59.3438	-59.2594	-59.3969	-59.3187	-56.6719	-56.9219	-56.7375	-56.5531	-56.5187
	-0.4	0.38	-58.2125	-58.1969	-59.6469	-59.4781	-59.4938	-59.6469	-59.7375	-59.4594	-59.3875	-59.5312	-59.4688	-56.7969	-57.0844	-56.8937	-56.6813	-56.6531
	-0.4	0.4	-58.3219	-58.3094	-59.7281	-59.6094	-59.6156	-59.7938	-59.8406	-59.6094	-59.5125	-59.575	-59.5594	-56.8906	-57.1781	-56.9656	-56.8094	-56.7875
	-0.4	0.42	-58.4281	-58.4375	-59.8469	-59.6906	-59.6906	-59.8594	-59.8969	-59.7	-59.6094	-59.6844	-59.6719	-57.0469	-57.275	-57.0844	-56.8937	-56.875
	-0.4	0.44	-58.5594	-58.5031	-59.9375	-59.8	-59.7094	-59.8906	-59.9219	-59.7938	-59.6937	-59.8187	-59.75	-57.1031	-57.3594	-57.1625	-56.9781	-56.975
	-0.4	0.46	-58.5719	-58.4781	-59.8344	-59.675	-59.6875	-59.8344	-59.8937	-59.6531	-59.6344	-59.7	-59.6875	-57.0156	-57.3469	-57.0812	-56.8875	-56.875
	-0.4	0.48	-58.6219	-58.55	-59.7406	-59.5875	-59.6219	-59.7687	-59.8625	-59.6312	-59.5656	-59.6531	-59.6312	-56.9219	-57.2562	-57.0406	-56.7812	-56.7875
	-0.4	0.5	-58.7375	-58.6219	-59.7	-59.5531	-59.5625	-59.6937	-59.75	-59.5375	-59.4469	-59.55	-59.4969	-56.7375	-57.1188	-56.9062	-56.6312	-56.6219
	-0.4	0.52	-58.75	-58.6688	-59.6219	-59.4406	-59.4375	-59.5594	-59.5312	-59.3781	-59.3	-59.45	-59.3969	-56.5156	-56.825	-56.6531	-56.375	-56.3906
	-0.4	0.54	-58.7281	-58.6	-59.3375	-59.2344	-59.2	-59.3312	-59.325	-59.0938	-59.025	-59.175	-59.1781	-56.1813	-56.4813	-56.3187	-56.0187	-56.1031
	-0.4	0.56	-58.5969	-58.475	-58.9781	-58.8875	-58.8156	-58.9625	-58.9406	-58.7625	-58.675	-58.8656	-58.8312	-55.7906	-56.0594	-55.9062	-55.5656	-55.6781
	-0.4	0.58	-58.425	-58.3	-58.5656	-58.5	-58.4188	-58.5344	-58.4656	-58.2938	-58.2656	-58.4594	-58.4344	-55.2906	-55.55	-55.4156	-55.05	-55.1375
	-0.4	0.6	-58.1531	-58.0531	-58.1	-57.9656	-57.9125	-58.0406	-57.9188	-57.8125	-57.7687	-57.9594	-57.9688	-54.7	-54.9594	-54.7938	-54.4656	-54.5656
	-0.4	0.62	-57.7812	-57.6844	-57.5312	-57.4219	-57.3563	-57.4094	-57.4	-57.15	-57.225	-57.4094	-57.325	-54.1219	-54.3781	-54.1594	-53.8344	-53.9188
	-0.4	0.64	-57.3688	-57.3187	-56.9219	-56.8094	-56.675	-56.7625	-56.8094	-56.5312	-56.6281	-56.775	-56.7156	-53.4188	-53.6813	-53.5125	-53.1781	-53.25
	-0.4	0.66	-56.9281	-56.925	-56.2094	-56.1437	-56.0406	-56.1	-56.1437	-56.0156	-56	-56.1344	-56.0844	-52.7313	-53.0344	-52.8187	-52.4781	-52.6281
	-0.4	0.68	-56.4594	-56.4469	-55.5312	-55.4062	-55.3812	-55.4156	-55.4875	-55.275	-55.3281	-55.4906	-55.4281	-52.0375	-52.3219	-52.1594	-51.8	-51.875
	-0.4	0.7	-55.9688	-55.9781	-54.8781	-54.7406	-54.6844	-54.6844	-54.8187	-54.6594	-54.7062	-54.8531	-54.8187	-51.3719	-51.6844	-51.4531	-51.1094	-51.2
	-0.4	0.72	-55.5594	-55.5094	-54.1375	-54.1	-54.0156	-54.0563	-54.225	-54.05	-54.0656	-54.25	-54.2	-50.6625	-51.0438	-50.7531	-50.4313	-50.5594
	-0.4	0.74	-55.0344	-55.025	-53.4469	-53.3812	-53.3563	-53.3844	-53.6156	-53.4031	-53.3594	-53.5906	-53.5844	-49.9875	-50.3594	-50.125	-49.7469	-49.8875
	-0.4	0.76	-54.55	-54.5344	-52.7719	-52.8156	-52.6937	-52.7344	-53.0187	-52.8469	-52.7281	-52.9875	-53.0125	-49.4125	-49.7062	-49.4906	-49.1437	-49.325
	-0.4	0.78	-54.1344	-54.1063	-52.1406	-52.2844	-52.0781	-52.1781	-52.4688	-52.275	-52.2188	-52.4469	-52.4375	-48.8438	-49.1406	-48.9562	-48.5125	-48.825
	-0.4	0.8	-53.6875	-53.725	-51.55	-51.7281	-51.5062	-51.6594	-51.9688	-51.7594	-51.6562	-51.9594	-51.9062	-48.325	-48.5531	-48.4219	-47.9344	-48.325
	-0.4	0.82	-53.3187	-53.3031	-51.0312	-51.2531	-50.975	-51.1719	-51.5219	-51.3344	-51.1312	-51.4906	-51.475	-47.8156	-48.0344	-47.9406	-47.4688	-47.8875
	-0.4	0.84	-53.0281	-52.95	-50.55	-50.8125	-50.4719	-50.7125	-51.125	-50.9781	-50.6594	-51.1437	-51.0938	-47.3906	-47.5531	-47.5062	-47.0094	-47.5969
	-0.4	0.86	-52.7719	-52.7562	-50.1156	-50.4188	-50.0156	-50.3125	-50.7625	-50.6344	-50.275	-50.8	-50.775	-47.0031	-47.125	-47.1562	-46.6562	-47.3594
	-0.4	0.88	-52.6437	-52.4938	-49.7375	-50.0938	-49.6969	-49.9719	-50.5438	-50.4	-49.9594	-50.5969	-50.5687	-46.7469	-46.8156	-46.8531	-46.4406	-47.1656
	-0.4	0.9	-52.4938	-52.3875	-49.4313	-49.8625	-49.4281	-49.7313	-50.375	-50.2656	-49.7875	-50.4125	-50.475	-46.5781	-46.6344	-46.6344	-46.3125	-47.1437
	-0.4	0.92	-52.5094	-52.4125	-49.2	-49.7469	-49.2469	-49.5906	-50.2531	-50.0563	-49.575	-50.3219	-50.4688	-46.5	-46.5	-46.525	-46.2562	-47.1906
	-0.4	0.94	-52.5469	-52.4906	-49.0031	-49.6656	-49.1188	-49.5	-50.2	-50.0375	-49.4313	-50.2906	-50.4875	-46.4875	-46.4219	-46.4656	-46.3125	-47.4375
	-0.4	0.96	-52.6937	-52.625	-48.8969	-49.6875	-49.0625	-49.4375	-50.2531	-50.0375	-49.3656	-50.3594	-50.6188	-46.6344	-46.4	-46.4188	-46.4875	-47.7
	-0.4	0.98	-52.8875	-52.8781	-48.6219	-49.6875	-49.0844	-49.3844	-50.275	-50.1	-49.325	-50.5125	-50.7687	-46.7969	-46.4938	-46.475	-46.6969	-48.0594
	-0.4	1	-53.1312	-53.1969	-48.125	-49.7656	-49.1	-49.4	-50.3937	-50.2	-49.3	-50.6344	-50.9844	-47.0094	-46.65	-46.6188	-46.9344	-48.4969
	-0.4	1.02	-53.4469	-53.5687	-46.975	-49.875	-49.0625	-49.3469	-50.5844	-50.3625	-49.35	-50.85	-51.1688	-47.3406	-46.8937	-46.85	-47.2062	-48.975
	-0.4	1.04	-53.75	-54.025	-45.1781	-49.8281	-48.7781	-49.0406	-50.7875	-50.6	-49.3844	-51.125	-51.4469	-47.6781	-47.125	-47.1188	-47.5563	-49.4375
	-0.4	1.06	-54.075	-54.425	-42.6437	-49.4844	-47.95	-48.1312	-51.0563	-50.8156	-49.5156	-51.4656	-51.7344	-48.1094	-47.425	-47.4313	-47.8937	-49.9875
	-0.4	1.08	-54.4031	-54.9469	-39.5531	-48.525	-46.5	-46.5656	-51.325	-51.0281	-49.6781	-51.8	-52.0406	-48.4688	-47.7562	-47.7844	-48.25	-50.5
	-0.4	1.1	-54.7562	-55.3937	-35.7	-47.0156	-44.5	-44.35	-51.6188	-51.2656	-49.8656	-52.1906	-52.3906	-48.8406	-48.0969	-48.1094	-48.6188	-51.0125
	-0.4	1.12	-55.0781	-55.8469	-30.4531	-44.9094	-42.0375	-41.7438	-51.9688	-51.5656	-50.0906	-52.5312	-52.7375	-49.3094	-48.4656	-48.4906	-49.0406	-51.5344
	-0.4	1.14	-55.3969	-56.2969	-22.7375	-42.3937	-39.2469	-38.6	-52.3094	-51.8656	-50.3469	-52.9094	-53.0375	-49.7313	-48.9281	-48.85	-49.4562	-51.975
	-0.4	1.16	-55.7375	-56.7219	-13.0031	-39.5469	-36.0781	-34.875	-52.675	-52.1562	-50.5687	-53.3	-53.3906	-50.15	-49.2875	-49.2625	-49.8844	-52.3875
	-0.4	1.18	-56.0875	-57.0906	-3.34063	-36.35	-32.1969	-29.8594	-53.0187	-52.4313	-50.8156	-53.7344	-53.7469	-50.5719	-49.775	-49.6312	-50.2844	-52.7875
	-0.4	1.2	-56.3594	-57.4437	4.56563	-32.4	-26.6875	-22.4531	-53.3719	-52.7313	-51.0938	-54.1	-54.0625	-50.9344	-50.3187	-50.0094	-50.675	-53.2281
	-0.4	1.22	-56.7	-57.8063	9.60625	-26.9625	-18.7719	-13.0875	-53.7125	-52.9969	-51.35	-54.5219	-54.4188	-51.3031	-50.65	-50.3937	-51.0344	-53.625
	-0.4	1.24	-57.0219	-58.1469	11.5437	-19.0875	-9.37813	-3.69062	-54.1031	-53.3094	-51.6063	-54.9313	-54.7062	-51.6531	-51.0687	-50.775	-51.35	-53.9969
	-0.4	1.26	-57.2656	-58.4406	10.6	-9.7	-0.725	4	-54.4437	-53.6094	-51.8531	-55.3219	-55.0375	-51.9406	-51.475	-51.1437	-51.6937	-54.3656
	-0.4	1.28	-57.5094	-58.7	7.07188	-0.88125	5.87187	9.00937	-54.8438	-53.8187	-52.1	-55.7	-55.3438	-52.1844	-51.7969	-51.4625	-52.0312	-54.6688
	-0.4	1.3	-57.75	-58.9437	1.7625	5.93437	9.70938	11.0406	-55.1594	-54.1656	-52.2875	-56.0969	-55.6094	-52.5031	-52.1813	-51.7812	-52.325	-54.9688
	-0.4	1.32	-57.9875	-59.1375	-4.80312	10.0344	10.6906	10.1719	-55.5	-54.4781	-52.5594	-56.4437	-55.9188	-52.8156	-52.4938	-52.0719	-52.6406	-55.2313
	-0.4	1.34	-58.25	-59.375	-11.9656	11.1375	8.99063	6.87187	-55.9031	-54.775	-52.8156	-56.8187	-56.1594	-53.0656	-52.8281	-52.3781	-52.9625	-55.4844
	-0.4	1.36	-58.4375	-59.5875	-19.25	9.45312	5.15312	1.75625	-56.2375	-55.0438	-53.0781	-57.2188	-56.4031	-53.2594	-53.1188	-52.5875	-53.2344	-55.7156
	-0.4	1.38	-58.575	-59.725	-26.1406	5.54063	-0.2375	-4.625	-56.6125	-55.3094	-53.3312	-57.5531	-56.6094	-53.5125	-53.4125	-52.8844	-53.4813	-55.925
	-0.4	1.4	-58.7656	-59.925	-32.2625	0.0625	-6.61875	-11.5906	-56.9156	-55.6031	-53.6125	-57.8656	-56.8688	-53.75	-53.7031	-53.1031	-53.7	-56.1281
	-0.4	1.42	-58.875	-60.05	-37.5406	-6.60625	-13.5469	-18.7406	-57.2062	-55.8719	-53.8812	-58.2313	-57.0625	-53.9313	-53.9156	-53.3438	-53.9688	-56.3719
	-0.4	1.44	-59.05	-60.1844	-41.9281	-13.7312	-20.4625	-25.5844	-57.4969	-56.2094	-54.0687	-58.5094	-57.2812	-54.0812	-54.1969	-53.5312	-54.1906	-56.5719
	-0.4	1.46	-59.2313	-60.3438	-45.4688	-20.8594	-27.0312	-31.7313	-57.7625	-56.4469	-54.3594	-58.7625	-57.5125	-54.3688	-54.4	-53.7438	-54.4	-56.7281
	-0.4	1.48	-59.325	-60.4844	-48.2687	-27.5187	-32.9406	-37.0406	-58.0312	-56.6375	-54.6281	-59.0156	-57.7125	-54.5594	-54.6594	-53.9844	-54.6094	-56.8937
	-0.4	1.5	-59.4469	-60.5781	-50.4875	-33.4469	-37.9719	-41.5094	-58.3187	-56.9313	-54.8438	-59.2875	-57.9031	-54.7062	-54.8312	-54.1781	-54.8375	-57.0438
	-0.4	1.52	-59.6188	-60.6844	-52.1344	-38.55	-42.1813	-45.1344	-58.5156	-57.1437	-55.0844	-59.55	-58.0656	-54.8969	-55.0312	-54.3125	-55.05	-57.2344
	-0.4	1.54	-59.6844	-60.8375	-53.375	-42.75	-45.6312	-48	-58.7406	-57.3563	-55.3438	-59.7938	-58.2313	-55.0406	-55.1813	-54.5094	-55.2344	-57.3469
	-0.4	1.56	-59.7562	-60.9375	-54.2812	-46.2281	-48.3125	-50.325	-58.9594	-57.5938	-55.5438	-59.9906	-58.4094	-55.1594	-55.3625	-54.725	-55.3656	-57.4875
	-0.4	1.58	-59.85	-60.9938	-54.9406	-48.9281	-50.3906	-52.0094	-59.2094	-57.7656	-55.75	-60.1969	-58.5438	-55.3563	-55.475	-54.9313	-55.5625	-57.6312
	-0.4	1.6	-59.9156	-61.0625	-55.375	-51.0187	-52.075	-53.2969	-59.3312	-57.9813	-55.95	-60.3688	-58.6656	-55.5438	-55.6625	-55.075	-55.6875	-57.7562
	-0.4	1.62	-60.0219	-61.1875	-55.6344	-52.6188	-53.2906	-54.2313	-59.5	-58.1531	-56.1906	-60.6	-58.8094	-55.6437	-55.8187	-55.2531	-55.8281	-57.8625
	-0.4	1.64	-60.1344	-61.2531	-55.8156	-53.7938	-54.1688	-54.9469	-59.6688	-58.3531	-56.375	-60.7625	-58.9062	-55.7875	-55.9813	-55.4906	-55.9875	-58.0187
	-0.4	1.66	-60.25	-61.35	-55.9156	-54.7313	-54.8125	-55.4219	-59.8187	-58.4688	-56.6375	-60.85	-59.0156	-55.9625	-56.0844	-55.6063	-56.0844	-58.0375
	-0.4	1.68	-60.2969	-61.3656	-56.0062	-55.4125	-55.3688	-55.7438	-59.9969	-58.6156	-56.7531	-61.0125	-59.1312	-56.075	-56.2062	-55.7375	-56.2188	-58.0594
	-0.4	1.7	-60.3688	-61.4406	-56.0031	-55.875	-55.6969	-55.9094	-60.1375	-58.7781	-56.8969	-61.1562	-59.2219	-56.2094	-56.275	-55.8719	-56.3312	-58.2562
	-0.4	1.72	-60.4	-61.45	-55.9469	-56.1719	-55.9125	-56.0812	-60.2906	-58.9219	-57.0906	-61.2781	-59.3594	-56.2844	-56.3812	-55.9938	-56.4313	-58.3031
	-0.4	1.74	-60.4344	-61.4719	-55.8594	-56.4	-56.0812	-56.1813	-60.3844	-59.0531	-57.1875	-61.3844	-59.4594	-56.4	-56.4719	-56.1312	-56.55	-58.3906
	-0.4	1.76	-60.5	-61.5531	-55.775	-56.525	-56.1125	-56.2188	-60.5	-59.1813	-57.3156	-61.4813	-59.55	-56.5375	-56.5406	-56.3094	-56.6406	-58.4781
	-0.4	1.78	-60.55	-61.6	-55.7031	-56.5687	-56.1656	-56.2313	-60.6094	-59.2812	-57.475	-61.5812	-59.5719	-56.6344	-56.6688	-56.4375	-56.7125	-58.5438
	-0.4	1.8	-60.5062	-61.6281	-55.6531	-56.6375	-56.2219	-56.2375	-60.6656	-59.3406	-57.5938	-61.7219	-59.6219	-56.7531	-56.7406	-56.5312	-56.8219	-58.65
	-0.4	1.82	-60.5531	-61.7	-55.6312	-56.6281	-56.1844	-56.2375	-60.7313	-59.4813	-57.7156	-61.7812	-59.7	-56.8344	-56.8187	-56.65	-56.8781	-58.6844
	-0.4	1.84	-60.6281	-61.6719	-55.5719	-56.5938	-56.1437	-56.1906	-60.8469	-59.55	-57.825	-61.8688	-59.7406	-56.8625	-56.9188	-56.7125	-56.9437	-58.7188
	-0.4	1.86	-60.625	-61.6813	-55.5	-56.5469	-56.1094	-56.1063	-60.9156	-59.5906	-57.9125	-61.9125	-59.775	-56.9437	-57.0344	-56.8531	-57	-58.7469
	-0.4	1.88	-60.675	-61.7094	-55.4562	-56.5656	-56.1125	-56.1312	-61.0187	-59.7	-57.975	-62.0281	-59.8531	-57.0687	-57.0781	-56.9437	-57.0938	-58.8156
	-0.4	1.9	-60.7281	-61.725	-55.4719	-56.5094	-56.1156	-56.0719	-61.0969	-59.8156	-58.1	-62.0906	-59.8875	-57.1594	-57.1	-56.9688	-57.1531	-58.85
	-0.4	1.92	-60.7656	-61.7375	-55.4562	-56.5	-56.125	-56.0594	-61.15	-59.8625	-58.1594	-62.1219	-60.0344	-57.1781	-57.2188	-57.0031	-57.1875	-58.8344
[truncated: 2,662 more rows]

## Sheet: panel C
		Contralateral lead (ms)	Spikes/stimulus
		-0.24	1
		-0.14	0.92
[truncated: 17 more rows]

## Sheet: panel D
		Contralateral lead (ms)	Spikes/stimulus
[truncated: 15 more rows]

[truncated: 1 more sheets: panel E]
