# Supplementary material for: Glycinergic axonal inhibition subserves acute spatial sensitivity to sudden increases in sound intensity
Source: eLife journal article supplement (doi:10.7554/elife.62183), 2021-06-14
Supplement: supp [file elife-62183-supp-v1.zip › elife_poa_e62183_Figure_7_figure_supplement_2_source_data_1.xlsx]

## Sheet: panel A
	spike probability
ITD (ms)	6 soma + 2 AIS	8 soma	2 AIS
-0.6	0.999	1	0.9998
-0.59	0.999	0.9999	0.9998
-0.58	0.999	0.9999	0.999
-0.57	0.999	0.9998	0.999
-0.56	0.9989	0.9998	0.999
-0.55	0.997	0.9998	0.999
-0.54	0.9957	0.9998	0.999
-0.53	0.9957	0.9998	0.999
-0.52	0.9957	0.9998	0.999
-0.51	0.9957	0.9998	0.999
-0.5	0.9957	0.9998	0.9958
-0.49	0.9854	0.9998	0.9958
-0.48	0.9846	0.9993	0.9958
-0.47	0.9843	0.9993	0.9958
-0.46	0.9843	0.999	0.9958
-0.45	0.9658	0.999	0.9958
-0.44	0.9562	0.9989	0.9958
-0.43	0.953	0.9989	0.985
-0.42	0.9527	0.9989	0.985
-0.41	0.9101	0.9989	0.985
-0.4	0.8881	0.997	0.985
-0.39	0.8832	0.997	0.985
-0.38	0.8827	0.9956	0.985
-0.37	0.8028	0.9956	0.985
-0.36	0.7611	0.9956	0.985
-0.35	0.7524	0.9952	0.9545
-0.34	0.6424	0.9886	0.9544
-0.33	0.5778	0.9886	0.9544
-0.32	0.5654	0.9886	0.9544
-0.31	0.4484	0.984	0.9544
-0.3	0.3822	0.984	0.9544
-0.29	0.3821	0.984	0.9544
-0.28	0.2668	0.9655	0.9544
-0.27	0.2196	0.9641	0.9544
-0.26	0.1769	0.9641	0.9544
-0.25	0.1584	0.9513	0.9544
-0.24	0.1172	0.9513	0.9544
-0.23	0.1075	0.9092	0.9544
-0.22	0.1075	0.9092	0.9544
-0.21	0.0976	0.9092	0.9544
-0.2	0.085	0.909	0.9544
-0.19	0.0644	0.9051	0.9544
-0.18	0.0643	0.8758	0.9544
-0.17	0.0643	0.7992	0.9544
-0.16	0.0643	0.7992	0.9544
-0.15	0.0632	0.7992	0.9544
-0.14	0.0478	0.7992	0.9544
-0.13	0.0478	0.7992	0.9544
-0.12	0.0372	0.7992	0.9544
-0.11	0.0372	0.7992	0.9544
-0.1	0.0366	0.6368	0.9544
-0.09	0.0363	0.6279	0.9544
-0.08	0.0363	0.6279	0.9544
-0.07	0.0341	0.6273	0.9544
-0.06	0.0341	0.6273	0.9544
-0.05	0.0341	0.6273	0.9544
-0.04	0.0267	0.6273	0.9544
-0.03	0.0267	0.6273	0.9544
-0.02	0.0272	0.6273	0.9544
-0.01	0.0272	0.6272	0.9545
0	0.0272	0.5103	0.9545
0.01	0.0272	0.5103	0.9545
0.02	0.0273	0.5103	0.9545
0.03	0.0273	0.5103	0.9545
0.04	0.0273	0.5103	0.9545
0.05	0.0273	0.5103	0.9545
0.06	0.0273	0.5103	0.9545
0.07	0.0273	0.4344	0.9545
0.08	0.0295	0.4344	0.985
0.09	0.0295	0.4344	0.985
0.1	0.0369	0.4344	0.985
0.11	0.038	0.4344	0.985
0.12	0.038	0.4344	0.985
0.13	0.038	0.4344	0.985
0.14	0.0392	0.5103	0.985
0.15	0.0392	0.5103	0.985
0.16	0.0392	0.5103	0.985
0.17	0.0393	0.5103	0.985
0.18	0.0393	0.5103	0.985
0.19	0.05	0.5103	0.985
0.2	0.05	0.5103	0.985
0.21	0.0548	0.5103	0.985
0.22	0.0548	0.5103	0.985
0.23	0.0548	0.5103	0.985
0.24	0.0563	0.6273	0.985
0.25	0.0718	0.6273	0.985
0.26	0.0768	0.6273	0.985
0.27	0.0783	0.6273	0.9958
0.28	0.0783	0.6273	0.9958
0.29	0.0784	0.6273	0.9958
0.3	0.0885	0.6273	0.9958
0.31	0.0885	0.6279	0.9958
0.32	0.0885	0.6279	0.9958
0.33	0.0984	0.6279	0.9958
0.34	0.1207	0.6279	0.9958
0.35	0.1221	0.6279	0.9958
0.36	0.1427	0.6368	0.9958
0.37	0.1524	0.6368	0.9958
0.38	0.1524	0.6368	0.9958
0.39	0.1657	0.6901	0.9958
0.4	0.1657	0.7992	0.9958
0.41	0.1657	0.7992	0.9958
0.42	0.2129	0.7992	0.9958
0.43	0.2129	0.7992	0.9958
0.44	0.2555	0.7992	0.9958
0.45	0.2634	0.7992	0.9959
0.46	0.2634	0.7992	0.9959
0.47	0.2824	0.7992	0.9959
0.48	0.2948	0.7992	0.999
0.49	0.2948	0.7992	0.999
0.5	0.3558	0.7992	0.999
0.51	0.3558	0.7992	0.999
0.52	0.4445	0.7992	0.999
0.53	0.4445	0.7992	0.999
0.54	0.4445	0.8758	0.999
0.55	0.4446	0.9051	0.999
0.56	0.4447	0.9092	0.999
0.57	0.4453	0.9092	0.999
0.58	0.4715	0.9092	0.999
0.59	0.5284	0.9092	0.999
0.6	0.6453	0.9092	0.999
0.61	0.6453	0.9092	0.999
0.62	0.6453	0.9092	0.999
0.63	0.6453	0.9092	0.999
0.64	0.6453	0.9092	0.999
0.65	0.6453	0.9092	0.999
0.66	0.6453	0.9092	0.999
0.67	0.6453	0.9092	0.999
0.68	0.7544	0.9513	0.999
0.69	0.7944	0.9513	0.999
0.7	0.8067	0.9513	0.999
0.71	0.8067	0.9641	0.999
0.72	0.8084	0.9641	0.9998
0.73	0.8084	0.9641	0.9998
0.74	0.8084	0.9641	0.9998
0.75	0.8085	0.9655	0.9998
0.76	0.8085	0.9655	0.9998
0.77	0.8085	0.9655	0.9998
0.78	0.8852	0.9655	0.9998
0.79	0.8852	0.9655	0.9998
0.8	0.9071	0.9655	0.9998
0.81	0.9071	0.9656	0.9998
0.82	0.9092	0.9656	0.9998
0.83	0.9092	0.984	0.9998
0.84	0.9124	0.984	0.9998
0.85	0.9124	0.984	0.9998
0.86	0.9125	0.984	0.9998
0.87	0.9125	0.984	0.9998
0.88	0.9125	0.984	0.9998
0.89	0.9551	0.9886	0.9998
0.9	0.9551	0.9886	0.9998
0.91	0.9551	0.9886	0.9998
0.92	0.9648	0.9886	0.9998
0.93	0.9648	0.9886	0.9998
0.94	0.9648	0.9886	0.9998
0.95	0.9648	0.9886	0.9998
0.96	0.9648	0.9886	0.9998
0.97	0.9656	0.989	0.9998
0.98	0.9656	0.989	0.9998
0.99	0.9656	0.989	0.9998
1	0.9667	0.9956	0.9998
1.01	0.9852	0.9956	0.9998
1.02	0.9852	0.9956	0.9998
1.03	0.9852	0.9956	0.9998
1.04	0.9852	0.9956	0.9998
1.05	0.9852	0.9956	1
1.06	0.9852	0.9956	1
1.07	0.9886	0.9956	1
1.08	0.9888	0.9956	1
1.09	0.9888	0.9956	1
1.1	0.9888	0.997	1
1.11	0.9888	0.997	1
1.12	0.9888	0.997	1
1.13	0.9888	0.997	1
1.14	0.9888	0.997	1
1.15	0.9888	0.997	1
1.16	0.9956	0.997	1
1.17	0.9956	0.997	1
1.18	0.9956	0.997	1
1.19	0.9959	0.997	1
1.2	0.996	0.9989	1

## Sheet: panel C
	minimum spike probabilty
backward coupling constant	6 soma + 2 AIS	8 soma
0.45	0.0074	0.4344
0.5	0.0103	0.4344
0.55	0.0182	0.4344
0.6	0.0267	0.4344
0.65	0.0392	0.4344
0.7	0.0548	0.4344
0.75	0.0885	0.4344
0.8	0.1121	0.4344
0.85	0.145	0.4344
0.9	0.1918	0.4182
0.95	0.2467	0.3295
