# Supplementary material for: Glycinergic axonal inhibition subserves acute spatial sensitivity to sudden increases in sound intensity
Source: eLife journal article supplement (doi:10.7554/elife.62183), 2021-06-14
Supplement: supp [file elife-62183-supp-v1.zip › elife_poa_e62183_Figure_7_source_data_1.xlsx]

## Sheet: panel A
	spike probability
ITD (ms)	6 soma + 2 AIS	8 soma	2 AIS
-0.4	0.9996	0.9999	0.9999
-0.38	0.9996	0.9999	0.9996
-0.36	0.9996	0.9999	0.9996
-0.34	0.9987	0.9999	0.9996
-0.32	0.9981	0.9999	0.9996
-0.3	0.9981	0.9997	0.9996
-0.28	0.9981	0.9996	0.9982
-0.26	0.9923	0.9996	0.9982
-0.24	0.9922	0.9996	0.9981
-0.22	0.9812	0.9996	0.9981
-0.2	0.9735	0.9996	0.9981
-0.18	0.9731	0.9987	0.9925
-0.16	0.9288	0.9981	0.9925
-0.14	0.9255	0.9981	0.9925
-0.12	0.8621	0.9979	0.9925
-0.1	0.8293	0.9945	0.9925
-0.08	0.7222	0.9921	0.9742
-0.06	0.6639	0.9921	0.9742
-0.04	0.6639	0.9921	0.9742
-0.02	0.5262	0.9803	0.9742
0	0.451	0.9803	0.9742
0.02	0.3414	0.9726	0.974
0.04	0.3268	0.9726	0.974
0.06	0.2648	0.9434	0.9261
0.08	0.1875	0.9434	0.9261
0.1	0.1858	0.941	0.9261
0.12	0.1265	0.9208	0.9261
0.14	0.1253	0.9208	0.9261
0.16	0.1163	0.8598	0.9261
0.18	0.0947	0.8598	0.9261
0.2	0.0783	0.8594	0.9261
0.22	0.078	0.8532	0.9261
0.24	0.078	0.8108	0.9261
0.26	0.078	0.7106	0.9261
0.28	0.0479	0.7106	0.9261
0.3	0.046	0.7106	0.9261
0.32	0.0458	0.7106	0.9261
0.34	0.044	0.7106	0.8254
0.36	0.044	0.7106	0.8254
0.38	0.0432	0.7106	0.8254
0.4	0.0432	0.7106	0.8254
0.42	0.0428	0.5044	0.8254
0.44	0.0427	0.5033	0.8254
0.46	0.0323	0.5033	0.8254
0.48	0.0323	0.5033	0.8254
0.5	0.0323	0.5033	0.8254
0.52	0.0323	0.5033	0.8254
0.54	0.0224	0.5033	0.8254
0.56	0.0224	0.5033	0.8254
0.58	0.0224	0.5033	0.8254
0.6	0.0224	0.5033	0.8254
0.62	0.0224	0.5033	0.8254
0.64	0.0224	0.5033	0.8254
0.66	0.0224	0.5033	0.9261
0.68	0.0224	0.5033	0.9261
0.7	0.0224	0.5033	0.9261
0.72	0.0224	0.5033	0.9261
0.74	0.0224	0.5033	0.9261
0.76	0.0224	0.5033	0.9261
0.78	0.0224	0.5033	0.9261
0.8	0.0224	0.5033	0.9261
0.82	0.0224	0.5033	0.9261
0.84	0.0224	0.5033	0.9261
0.86	0.0224	0.5033	0.9261
0.88	0.033	0.5033	0.9261
0.9	0.033	0.5033	0.9261
0.92	0.033	0.5033	0.9261
0.94	0.033	0.5033	0.9261
0.96	0.033	0.5033	0.9261
0.98	0.0434	0.5033	0.9261
1	0.0452	0.5033	0.9261
1.02	0.0452	0.5033	0.9261
1.04	0.0452	0.5033	0.9261
1.06	0.0452	0.5033	0.9261
1.08	0.0452	0.5033	0.9261
1.1	0.0452	0.5033	0.9261
1.12	0.0453	0.5033	0.9261
1.14	0.0453	0.5033	0.9261
1.16	0.0453	0.5033	0.9261
1.18	0.0453	0.5033	0.9261
1.2	0.0469	0.5033	0.9261
1.22	0.0469	0.5033	0.974
1.24	0.0469	0.5033	0.974
1.26	0.0557	0.5033	0.974
1.28	0.0557	0.5033	0.974
1.3	0.0751	0.5033	0.974
1.32	0.0939	0.6269	0.974
1.34	0.0939	0.6966	0.9742
1.36	0.0939	0.6966	0.9742
1.38	0.0945	0.7106	0.9742
1.4	0.0945	0.7106	0.9742
1.42	0.0945	0.7106	0.9742
1.44	0.0946	0.7106	0.9742
1.46	0.0946	0.7106	0.9742
1.48	0.0962	0.7106	0.9742
1.5	0.0962	0.7106	0.9742
1.52	0.1554	0.7106	0.9742
1.54	0.1554	0.7106	0.9742
1.56	0.1554	0.7106	0.9742
1.58	0.1554	0.7106	0.9742
1.6	0.1554	0.7106	0.9742
1.62	0.1769	0.7106	0.9742
1.64	0.186	0.7106	0.9742
1.66	0.1872	0.7106	0.9742
1.68	0.1872	0.7106	0.9925
1.7	0.1872	0.8108	0.9925
1.72	0.247	0.8108	0.9925
1.74	0.3035	0.8108	0.9925
1.76	0.3175	0.8532	0.9925
1.78	0.3189	0.8532	0.9925
1.8	0.3189	0.8532	0.9925
1.82	0.3189	0.8532	0.9925
1.84	0.3189	0.8532	0.9925
1.86	0.3191	0.8594	0.9925
1.88	0.3191	0.8594	0.9925
1.9	0.3365	0.8594	0.9925
1.92	0.3365	0.8594	0.9925
1.94	0.4448	0.8594	0.9925
1.96	0.4448	0.8598	0.9925
1.98	0.5149	0.8598	0.9925
2	0.5149	0.8598	0.9925
2.02	0.5149	0.8598	0.9925
2.04	0.5268	0.8598	0.9925
2.06	0.5268	0.9208	0.9925
2.08	0.5276	0.9208	0.9925
2.1	0.5276	0.9208	0.9925
2.12	0.5277	0.9208	0.9925
2.14	0.5277	0.9208	0.9925
2.16	0.5277	0.9208	0.9925
2.18	0.6513	0.941	0.9981
2.2	0.6514	0.941	0.9981
2.22	0.662	0.941	0.9981
2.24	0.662	0.941	0.9981
2.26	0.7142	0.941	0.9981
2.28	0.7142	0.941	0.9981
2.3	0.7142	0.941	0.9981
2.32	0.7142	0.941	0.9981
2.34	0.7238	0.9434	0.9981
2.36	0.7238	0.9434	0.9982
2.38	0.7238	0.9434	0.9982
2.4	0.7238	0.9434	0.9982
2.42	0.7242	0.9434	0.9982
2.44	0.8244	0.9724	0.9982
2.46	0.8246	0.9724	0.9982
2.48	0.8246	0.9724	0.9982
2.5	0.8246	0.9724	0.9982
2.52	0.8246	0.9724	0.9982
2.54	0.8564	0.9726	0.9982
2.56	0.8564	0.9726	0.9982
2.58	0.8615	0.9726	0.9982
2.6	0.8615	0.9726	0.9982
2.62	0.8615	0.9726	0.9982
2.64	0.8615	0.9803	0.9982
2.66	0.8648	0.9803	0.9982
2.68	0.8648	0.9803	0.9982
2.7	0.8648	0.9803	0.9982
2.72	0.8648	0.9803	0.9982
2.74	0.9258	0.9803	0.9982
2.76	0.9268	0.9803	0.9982
2.78	0.9268	0.9803	0.9982
2.8	0.9268	0.9803	0.9982
2.82	0.927	0.9803	0.9996
2.84	0.927	0.9803	0.9996
2.86	0.927	0.9803	0.9996
2.88	0.9422	0.981	0.9996
2.9	0.9422	0.9921	0.9996
2.92	0.9422	0.9921	0.9996
2.94	0.9422	0.9921	0.9996
2.96	0.9422	0.9921	0.9996
2.98	0.9422	0.9921	0.9996
3	0.9442	0.9921	0.9996
3.02	0.9442	0.9921	0.9996
3.04	0.9442	0.9921	0.9996
3.06	0.9454	0.9921	0.9996
3.08	0.9745	0.9921	0.9996
3.1	0.9745	0.9921	0.9996
3.12	0.9745	0.9921	0.9996
3.14	0.9745	0.9921	0.9996
3.16	0.9745	0.9921	0.9996
3.18	0.9745	0.9945	0.9996
3.2	0.9745	0.9945	0.9996
3.22	0.9745	0.9945	0.9996
3.24	0.9745	0.9945	0.9996
3.26	0.9748	0.9945	0.9996
3.28	0.9806	0.9945	0.9996
3.3	0.9806	0.9945	0.9996
3.32	0.9806	0.9945	0.9996
3.34	0.9806	0.9945	0.9996
3.36	0.9806	0.9945	0.9996
3.38	0.9806	0.9945	0.9996
3.4	0.9806	0.9945	0.9996

## Sheet: panel C
	minimum spike probabilty
backward coupling constant	6 soma + 2 AIS	8 soma
0.45	0.0054	0.2878
0.5	0.0091	0.309
0.55	0.0167	0.395
0.6	0.0224	0.5033
0.65	0.0452	0.5033
0.7	0.0557	0.5033
0.75	0.0956	0.5033
0.8	0.1548	0.5033
0.85	0.1562	0.5033
0.9	0.2865	0.5033
0.95	0.2865	0.395
