# Supplementary material for: Glycinergic axonal inhibition subserves acute spatial sensitivity to sudden increases in sound intensity
Source: eLife journal article supplement (doi:10.7554/elife.62183), 2021-06-14
Supplement: supp [file elife-62183-supp-v1.zip › elife_poa_e62183_Figure_8_figure_supplement_1_source_data_1.xlsx]

## Sheet: panel A
		Top panel					Bottom panel
		Sound level (dB)	Post-stimulus time (ms)	Vm rel (mV)			Sound level (dB)	Post-stimulus time (ms)	Vm rel (mV)
		0	3.00768	-0.108765			0	3.00768	0.0686798
		0	3.01792	-0.0437584			0	3.01792	0.100056
		0	3.02816	-0.0673828			0	3.02816	0.120384
		0	3.0384	-0.0909882			0	3.0384	0.0831261
		0	3.04864	-0.0679817			0	3.04864	0.0122223
		0	3.05888	0.00334167			0	3.05888	-0.0333481
		0	3.06912	-0.0166168			0	3.06912	0.0253105
		0	3.07936	-0.0906067			0	3.07936	0.0567818
		0	3.0896	-0.0493126			0	3.0896	0.0647697
		0	3.09984	-0.000213623			0	3.09984	0.0544472
		0	3.11008	0.000408173			0	3.11008	0.0443611
		0	3.12032	0.0771446			0	3.12032	0.108425
		0	3.13056	0.170326			0	3.13056	0.0665321
		0	3.1408	0.233177			0	3.1408	0.0296288
		0	3.15104	0.251358			0	3.15104	0.0941353
		0	3.16128	0.275352			0	3.16128	0.0523491
		0	3.17152	0.170185			0	3.17152	0.0117378
		0	3.18176	0.103477			0	3.18176	0.0295677
		0	3.192	0.124336			0	3.192	-0.00928116
		0	3.20224	0.117962			0	3.20224	-0.00118637
		0	3.21248	0.0677834			0	3.21248	0.033989
		0	3.22272	0.0610847			0	3.22272	0.00769424
		0	3.23296	0.129333			0	3.23296	0.0735817
		0	3.2432	0.158813			0	3.2432	0.0565109
		0	3.25344	0.166481			0	3.25344	0.0447807
		0	3.26368	0.145748			0	3.26368	0.058239
		0	3.27392	0.0979462			0	3.27392	0.123768
		0	3.28416	0.0819473			0	3.28416	0.0434532
		0	3.2944	0.0754128			0	3.2944	-0.0349846
		0	3.30464	0.0996857			0	3.30464	-0.0440788
		0	3.31488	0.225895			0	3.31488	0.051815
		0	3.32512	0.116795			0	3.32512	0.0346947
		0	3.33536	0.136272			0	3.33536	-0.0302963
		0	3.3456	0.0777016			0	3.3456	-0.0286751
		0	3.35584	0.0715752			0	3.35584	0.0355148
		0	3.36608	0.0640869			0	3.36608	0.0935135
		0	3.37632	0.0821762			0	3.37632	0.0570221
		0	3.38656	0.0317268			0	3.38656	-0.0158958
		0	3.3968	0.0168953			0	3.3968	-0.102863
		0	3.40704	-0.0318832			0	3.40704	-0.117718
		0	3.41728	-0.0326843			0	3.41728	-0.132877
		0	3.42752	0.062027			0	3.42752	-0.0698051
		0	3.43776	0.0618248			0	3.43776	-0.0745735
		0	3.448	0.0948219			0	3.448	-0.0527077
		0	3.45824	0.0819626			0	3.45824	0.0147018
		0	3.46848	0.179745			0	3.46848	0.0510025
		0	3.47872	0.0720901			0	3.47872	0.10622
		0	3.48896	0.0252037			0	3.48896	0.139339
		0	3.4992	0.0286751			0	3.4992	0.11031
		0	3.50944	-0.0145187			0	3.50944	0.105984
		0	3.51968	-0.00267792			0	3.51968	0.119549
		0	3.52992	0.0438843			0	3.52992	0.0527763
		0	3.54016	0.062458			0	3.54016	0.0149307
		0	3.5504	-0.0642853			0	3.5504	0.0196381
		0	3.56064	-0.0843735			0	3.56064	-0.000961304
		0	3.57088	-0.00954437			0	3.57088	-0.0165558
		0	3.58112	0.0429878			0	3.58112	0.00360489
		0	3.59136	0.125328			0	3.59136	0.0279579
		0	3.6016	0.200909			0	3.6016	0.02388
		0	3.61184	0.261417			0	3.61184	-0.0424461
		0	3.62208	0.205231			0	3.62208	-0.0536537
		0	3.63232	0.19603			0	3.63232	-0.0897827
		0	3.64256	0.24493			0	3.64256	-0.0265541
		0	3.6528	0.110855			0	3.6528	-0.0505066
		0	3.66304	0.0531349			0	3.66304	-0.0825119
		0	3.67328	0.0155869			0	3.67328	-0.0439034
		0	3.68352	-0.0856476			0	3.68352	0.0103302
		0	3.69376	-0.0643005			0	3.69376	-0.0411835
		0	3.704	-0.0527115			0	3.704	-0.146503
		0	3.71424	0.0362396			0	3.71424	-0.231823
		0	3.72448	0.0556717			0	3.72448	-0.210781
		0	3.73472	0.0195274			0	3.73472	-0.127064
		0	3.74496	0.0537071			0	3.74496	-0.094017
		0	3.7552	0.114777			0	3.7552	-0.0979271
		0	3.76544	0.108566			0	3.76544	-0.104397
		0	3.77568	0.123875			0	3.77568	-0.150578
		0	3.78592	0.155449			0	3.78592	-0.162884
		0	3.79616	0.248863			0	3.79616	-0.152573
		0	3.8064	0.252441			0	3.8064	-0.168961
		0	3.81664	0.308849			0	3.81664	-0.161068
		0	3.82688	0.284912			0	3.82688	-0.137196
		0	3.83712	0.296188			0	3.83712	-0.0715828
		0	3.84736	0.295036			0	3.84736	0.0456734
		0	3.8576	0.222534			0	3.8576	0.145725
		0	3.86784	0.0603104			0	3.86784	-0.0476456
		0	3.87808	0.0172882			0	3.87808	-0.218136
		0	3.88832	0.0555038			0	3.88832	-0.280876
		0	3.89856	0.00279236			0	3.89856	-0.264175
		0	3.9088	-0.0865555			0	3.9088	-0.304375
		0	3.91904	-0.0194283			0	3.91904	-0.306782
		0	3.92928	0.0748405			0	3.92928	-0.161285
		0	3.93952	0.120975			0	3.93952	-0.0586815
		0	3.94976	-0.00138855			0	3.94976	-0.0984039
		0	3.96	-0.0279007			0	3.96	-0.20121
		0	3.97024	-0.0505524			0	3.97024	-0.213726
		0	3.98048	-0.0424957			0	3.98048	-0.251884
		0	3.99072	-0.0509338			0	3.99072	-0.226555
		0	4.00096	0.0245819			0	4.00096	-0.320992
		0	4.0112	0.0394363			0	4.0112	-0.269886
		0	4.02144	0.0200996			0	4.02144	-0.276058
		0	4.03168	0.0327759			0	4.03168	-0.193962
		0	4.04192	0.100399			0	4.04192	-0.106735
		0	4.05216	0.0496788			0	4.05216	-0.0822029
		0	4.0624	-0.000976562			0	4.0624	-0.00688553
		0	4.07264	-0.0162201			0	4.07264	-0.0165634
		0	4.08288	0.0317345			0	4.08288	-0.0354958
		0	4.09312	0.0670853			0	4.09312	0.00225449
		0	4.10336	-0.0462036			0	4.10336	-0.00201035
		0	4.1136	-0.0666466			0	4.1136	-0.0649757
		0	4.12384	-0.0454483			0	4.12384	-0.0455818
		0	4.13408	0.021904			0	4.13408	-0.026165
		0	4.14432	0.0302734			0	4.14432	-0.0230255
		0	4.15456	-0.119469			0	4.15456	0.0512505
		0	4.1648	-0.133202			0	4.1648	0.0364342
		0	4.17504	-0.0766029			0	4.17504	-0.0587082
		0	4.18528	0.0140915			0	4.18528	-0.105247
		0	4.19552	-0.0133133			0	4.19552	-0.196903
		0	4.20576	-0.054512			0	4.20576	-0.256714
		0	4.216	-0.122688			0	4.216	-0.255928
		0	4.22624	-0.233482			0	4.22624	-0.220402
		0	4.23648	-0.225815			0	4.23648	-0.177727
		0	4.24672	-0.253948			0	4.24672	-0.258907
		0	4.25696	-0.130756			0	4.25696	-0.310169
		0	4.2672	-0.19059			0	4.2672	-0.27396
		0	4.27744	-0.252827			0	4.27744	-0.343914
		0	4.28768	-0.284004			0	4.28768	-0.335941
		0	4.29792	-0.299915			0	4.29792	-0.313656
		0	4.30816	-0.244244			0	4.30816	-0.26812
		0	4.3184	-0.277218			0	4.3184	-0.286121
		0	4.32864	-0.210571			0	4.32864	-0.358147
		0	4.33888	-0.108227			0	4.33888	-0.36618
		0	4.34912	-0.0864029			0	4.34912	-0.383911
		0	4.35936	-0.140579			0	4.35936	-0.383633
		0	4.3696	-0.230511			0	4.3696	-0.365299
		0	4.37984	-0.212749			0	4.37984	-0.347706
		0	4.39008	-0.264725			0	4.39008	-0.386745
		0	4.40032	-0.240467			0	4.40032	-0.435989
		0	4.41056	-0.2696			0	4.41056	-0.406654
		0	4.4208	-0.22831			0	4.4208	-0.379761
		0	4.43104	-0.291687			0	4.43104	-0.351662
		0	4.44128	-0.302837			0	4.44128	-0.418289
		0	4.45152	-0.267395			0	4.45152	-0.46323
		0	4.46176	-0.291092			0	4.46176	-0.448101
		0	4.472	-0.315067			0	4.472	-0.436825
		0	4.48224	-0.481686			0	4.48224	-0.385803
		0	4.49248	-0.470718			0	4.49248	-0.416653
		0	4.50272	-0.400955			0	4.50272	-0.505013
		0	4.51296	-0.381279			0	4.51296	-0.487789
		0	4.5232	-0.384193			0	4.5232	-0.518364
		0	4.53344	-0.42046			0	4.53344	-0.493511
		0	4.54368	-0.435001			0	4.54368	-0.48539
		0	4.55392	-0.427326			0	4.55392	-0.495205
		0	4.56416	-0.492096			0	4.56416	-0.484592
		0	4.5744	-0.417526			0	4.5744	-0.477703
		0	4.58464	-0.419136			0	4.58464	-0.412758
		0	4.59488	-0.38348			0	4.59488	-0.433105
		0	4.60512	-0.396511			0	4.60512	-0.575169
		0	4.61536	-0.363991			0	4.61536	-0.593777
		0	4.6256	-0.370533			0	4.6256	-0.456627
		0	4.63584	-0.445778			0	4.63584	-0.521847
		0	4.64608	-0.407097			0	4.64608	-0.431984
		0	4.65632	-0.425228			0	4.65632	-0.25906
		0	4.66656	-0.447533			0	4.66656	-0.279125
		0	4.6768	-0.381302			0	4.6768	-0.190098
		0	4.68704	-0.359116			0	4.68704	-0.0689125
		0	4.69728	-0.401997			0	4.69728	-0.109135
		0	4.70752	-0.383232			0	4.70752	-0.281521
		0	4.71776	-0.389965			0	4.71776	-0.319164
		0	4.728	-0.434265			0	4.728	-0.32267
		0	4.73824	-0.471123			0	4.73824	-0.215908
		0	4.74848	-0.437958			0	4.74848	-0.142986
		0	4.75872	-0.49234			0	4.75872	-0.1357
		0	4.76896	-0.468597			0	4.76896	-0.230808
		0	4.7792	-0.503632			0	4.7792	-0.240669
		0	4.78944	-0.39185			0	4.78944	-0.07798
		0	4.79968	-0.369534			0	4.79968	-0.00310898
		0	4.80992	-0.382359			0	4.80992	-0.0412865
		0	4.82016	-0.445175			0	4.82016	-0.112114
		0	4.8304	-0.424004			0	4.8304	-0.136955
		0	4.84064	-0.443871			0	4.84064	-0.172718
		0	4.85088	-0.412701			0	4.85088	-0.121994
		0	4.86112	-0.463612			0	4.86112	-0.0970688
		0	4.87136	-0.547226			0	4.87136	-0.00170135
		0	4.8816	-0.589306			0	4.8816	0.0516815
		0	4.89184	-0.556564			0	4.89184	0.0844078
		0	4.90208	-0.452995			0	4.90208	0.0656662
		0	4.91232	-0.470161			0	4.91232	0.0361252
		0	4.92256	-0.497135			0	4.92256	0.0670357
		0	4.9328	-0.498127			0	4.9328	0.0934525
		0	4.94304	-0.506973			0	4.94304	0.114098
		0	4.95328	-0.497299			0	4.95328	0.0737953
		0	4.96352	-0.578815			0	4.96352	-0.0288811
		0	4.97376	-0.598629			0	4.97376	-0.0199966
		0	4.984	-0.601147			0	4.984	-0.0100441
		0	4.99424	-0.631474			0	4.99424	0.00458145
		0	5.00448	-0.57671			0	5.00448	0.0340614
		0	5.01472	-0.629257			0	5.01472	0.00951767
		0	5.02496	-0.705147			0	5.02496	0.0132484
		0	5.0352	-0.798042			0	5.0352	0.0373268
		0	5.04544	-0.785			0	5.04544	0.0588722
		0	5.05568	-0.783249			0	5.05568	-0.0391197
		0	5.06592	-0.717304			0	5.06592	-0.0707817
		0	5.07616	-0.648235			0	5.07616	-0.0402641
		0	5.0864	-0.644753			0	5.0864	-0.0382118
		0	5.09664	-0.660347			0	5.09664	-0.0170403
		0	5.10688	-0.791985			0	5.10688	0.0981407
		0	5.11712	-0.763855			0	5.11712	0.102383
		0	5.12736	-0.579674			0	5.12736	0.17622
		0	5.1376	-0.575684			0	5.1376	0.104694
		0	5.14784	-0.592693			0	5.14784	0.0491447
		0	5.15808	-0.584816			0	5.15808	0.103607
		0	5.16832	-0.612339			0	5.16832	0.159149
		0	5.17856	-0.646313			0	5.17856	0.169529
		0	5.1888	-0.716171			0	5.1888	0.231472
		0	5.19904	-0.645638			0	5.19904	0.269753
		0	5.20928	-0.501751			0	5.20928	0.302868
		0	5.21952	-0.570663			0	5.21952	0.301056
		0	5.22976	-0.648472			0	5.22976	0.206249
		0	5.24	-0.648758			0	5.24	0.146046
		0	5.25024	-0.656723			0	5.25024	0.0658569
		0	5.26048	-0.78035			0	5.26048	0.0362549
		0	5.27072	-0.800331			0	5.27072	0.0165596
		0	5.28096	-0.901554			0	5.28096	0.081459
		0	5.2912	-0.986763			0	5.2912	0.111736
		0	5.30144	-1.01756			0	5.30144	0.138096
		0	5.31168	-1.03102			0	5.31168	0.254551
		0	5.32192	-0.912258			0	5.32192	0.25013
		0	5.33216	-0.853401			0	5.33216	0.201302
		0	5.3424	-0.860126			0	5.3424	0.18298
		0	5.35264	-0.821159			0	5.35264	0.127537
		0	5.36288	-0.739822			0	5.36288	0.187458
		0	5.37312	-0.69445			0	5.37312	0.273075
		0	5.38336	-0.596531			0	5.38336	0.177223
		0	5.3936	-0.494179			0	5.3936	0.193325
		0	5.40384	-0.478745			0	5.40384	0.189056
		0	5.41408	-0.371033			0	5.41408	0.180546
		0	5.42432	-0.423893			0	5.42432	0.108521
		0	5.43456	-0.343868			0	5.43456	0.166683
		0	5.4448	-0.2547			0	5.4448	0.216022
		0	5.45504	-0.277802			0	5.45504	0.141972
		0	5.46528	-0.359463			0	5.46528	0.176708
		0	5.47552	-0.357277			0	5.47552	0.16729
		0	5.48576	-0.387192			0	5.48576	0.125607
		0	5.496	-0.451645			0	5.496	0.066082
		0	5.50624	-0.418816			0	5.50624	0.00980377
		0	5.51648	-0.454376			0	5.51648	0.100414
		0	5.52672	-0.423035			0	5.52672	0.151211
		0	5.53696	-0.339291			0	5.53696	0.202171
		0	5.5472	-0.249298			0	5.5472	0.183971
		0	5.55744	-0.150043			0	5.55744	0.197666
		0	5.56768	-0.0635605			0	5.56768	0.193672
		0	5.57792	-0.132832			0	5.57792	0.256378
		0	5.58816	-0.143764			0	5.58816	0.313622
		0	5.5984	-0.0994186			0	5.5984	0.272694
		0	5.60864	-0.193722			0	5.60864	0.172916
		0	5.61888	-0.283714			0	5.61888	0.138084
		0	5.62912	-0.375507			0	5.62912	0.175014
		0	5.63936	-0.298378			0	5.63936	0.0792313
		0	5.6496	-0.249535			0	5.6496	0.0856438
		0	5.65984	-0.222919			0	5.65984	0.112907
		0	5.67008	-0.175236			0	5.67008	0.124043
		0	5.68032	-0.140053			0	5.68032	0.172073
		0	5.69056	-0.0728607			0	5.69056	0.232403
		0	5.7008	-0.0499458			0	5.7008	0.274815
		0	5.71104	-0.00556183			0	5.71104	0.208538
		0	5.72128	0.00445175			0	5.72128	0.206833
		0	5.73152	-0.0576019			0	5.73152	0.109306
		0	5.74176	-0.118492			0	5.74176	0.14196
		0	5.752	-0.0568466			0	5.752	0.114445
		0	5.76224	-0.0542488			0	5.76224	0.101986
		0	5.77248	0.0302238			0	5.77248	0.212509
		0	5.78272	0.096386			0	5.78272	0.148239
		0	5.79296	0.0495834			0	5.79296	0.192276
		0	5.8032	0.108498			0	5.8032	0.220997
		0	5.81344	0.179047			0	5.81344	0.250393
		0	5.82368	0.21917			0	5.82368	0.25243
		0	5.83392	0.32238			0	5.83392	0.351696
		0	5.84416	0.236431			0	5.84416	0.354805
		0	5.8544	0.233509			0	5.8544	0.379101
		0	5.86464	0.125603			0	5.86464	0.257904
		0	5.87488	0.193836			0	5.87488	0.182144
		0	5.88512	0.266434			0	5.88512	0.162212
		0	5.89536	0.274635			0	5.89536	0.170116
		0	5.9056	0.216843			0	5.9056	0.156124
		0	5.91584	0.286572			0	5.91584	0.172703
		0	5.92608	0.376892			0	5.92608	0.225441
		0	5.93632	0.415802			0	5.93632	0.212055
		0	5.94656	0.295536			0	5.94656	0.142445
		0	5.9568	0.275009			0	5.9568	0.108829
		0	5.96704	0.275948			0	5.96704	0.158848
		0	5.97728	0.299019			0	5.97728	0.202877
		0	5.98752	0.277687			0	5.98752	0.129086
		0	5.99776	0.334877			0	5.99776	0.13364
		0	6.008	0.32225			0	6.008	0.119701
		0	6.01824	0.345734			0	6.01824	0.22823
		0	6.02848	0.330925			0	6.02848	0.238243
		0	6.03872	0.272697			0	6.03872	0.318771
		0	6.04896	0.246708			0	6.04896	0.328342
		0	6.0592	0.232761			0	6.0592	0.24374
		0	6.06944	0.136856			0	6.06944	0.333458
		0	6.07968	0.0512276			0	6.07968	0.284939
		0	6.08992	0.0818977			0	6.08992	0.301773
		0	6.10016	0.11504			0	6.10016	0.28458
		0	6.1104	0.212837			0	6.1104	0.192554
		0	6.12064	0.242592			0	6.12064	0.271755
		0	6.13088	0.199226			0	6.13088	0.235802
		0	6.14112	0.171295			0	6.14112	0.176651
		0	6.15136	0.266647			0	6.15136	0.126282
		0	6.1616	0.233032			0	6.1616	0.0997353
		0	6.17184	0.285866			0	6.17184	0.0131187
		0	6.18208	0.276184			0	6.18208	-0.00974655
		0	6.19232	0.272823			0	6.19232	0.0534821
		0	6.20256	0.249973			0	6.20256	0.0799103
		0	6.2128	0.281574			0	6.2128	0.137646
		0	6.22304	0.341766			0	6.22304	0.16473
		0	6.23328	0.310829			0	6.23328	0.163586
		0	6.24352	0.38929			0	6.24352	0.185661
		0	6.25376	0.295822			0	6.25376	0.261028
		0	6.264	0.222412			0	6.264	0.32795
		0	6.27424	0.208347			0	6.27424	0.306217
		0	6.28448	0.198593			0	6.28448	0.200428
		0	6.29472	0.245548			0	6.29472	0.138966
		0	6.30496	0.243141			0	6.30496	0.128902
		0	6.3152	0.244751			0	6.3152	0.207096
		0	6.32544	0.239754			0	6.32544	0.252705
		0	6.33568	0.0870018			0	6.33568	0.267353
		0	6.34592	0.107662			0	6.34592	0.227158
		0	6.35616	0.11808			0	6.35616	0.119057
		0	6.3664	0.216938			0	6.3664	0.129539
		0	6.37664	0.294224			0	6.37664	0.0788612
		0	6.38688	0.24704			0	6.38688	-0.056427
		0	6.39712	0.212219			0	6.39712	-0.0986671
		0	6.40736	0.280952			0	6.40736	-0.0634041
		0	6.4176	0.204842			0	6.4176	0.0161095
		0	6.42784	0.18692			0	6.42784	0.0726624
		0	6.43808	0.150005			0	6.43808	0.0771904
		0	6.44832	0.1838			0	6.44832	0.0885658
		0	6.45856	0.314037			0	6.45856	0.00568008
		0	6.4688	0.270798			0	6.4688	0.0865059
		0	6.47904	0.25367			0	6.47904	0.159065
		0	6.48928	0.210335			0	6.48928	0.109138
		0	6.49952	0.237934			0	6.49952	0.102058
		0	6.50976	0.240582			0	6.50976	0.0207939
		0	6.52	0.156334			0	6.52	0.01474
		0	6.53024	0.164524			0	6.53024	0.0536728
		0	6.54048	0.161282			0	6.54048	-0.0126076
		0	6.55072	0.191498			0	6.55072	0.000957489
		0	6.56096	0.178337			0	6.56096	0.0116272
		0	6.5712	0.247002			0	6.5712	-0.04216
		0	6.58144	0.352566			0	6.58144	0.0522041
		0	6.59168	0.27993			0	6.59168	0.0708008
		0	6.60192	0.306671			0	6.60192	0.14637
		0	6.61216	0.319054			0	6.61216	0.152782
		0	6.6224	0.30835			0	6.6224	0.105553
		0	6.63264	0.29607			0	6.63264	0.124996
		0	6.64288	0.260391			0	6.64288	0.134079
		0	6.65312	0.246948			0	6.65312	0.132092
		0	6.66336	0.318996			0	6.66336	0.145855
		0	6.6736	0.321095			0	6.6736	0.176876
		0	6.68384	0.280239			0	6.68384	0.324696
		0	6.69408	0.305748			0	6.69408	0.329502
		0	6.70432	0.263977			0	6.70432	0.413361
		0	6.71456	0.346996			0	6.71456	0.313343
		0	6.7248	0.392532			0	6.7248	0.241714
		0	6.73504	0.266125			0	6.73504	0.20348
		0	6.74528	0.24263			0	6.74528	0.139324
		0	6.75552	0.244858			0	6.75552	0.163631
		0	6.76576	0.208023			0	6.76576	0.107422
		0	6.776	0.194504			0	6.776	0.153507
		0	6.78624	0.287884			0	6.78624	0.238266
		0	6.79648	0.409225			0	6.79648	0.256329
		0	6.80672	0.424911			0	6.80672	0.149433
		0	6.81696	0.391308			0	6.81696	0.0305328
		0	6.8272	0.381771			0	6.8272	0.125988
		0	6.83744	0.414055			0	6.83744	0.17429
		0	6.84768	0.297264			0	6.84768	0.0940247
		0	6.85792	0.141933			0	6.85792	0.0820084
		0	6.86816	0.0741272			0	6.86816	0.0782394
		0	6.8784	0.196949			0	6.8784	0.128738
		0	6.88864	0.200954			0	6.88864	0.157291
		0	6.89888	0.139858			0	6.89888	0.176052
		0	6.90912	0.208786			0	6.90912	0.123016
		0	6.91936	0.220848			0	6.91936	0.106468
		0	6.9296	0.273148			0	6.9296	0.210815
		0	6.93984	0.213425			0	6.93984	0.166542
		0	6.95008	0.214474			0	6.95008	0.124088
		0	6.96032	0.202385			0	6.96032	0.122601
		0	6.97056	0.137951			0	6.97056	0.218861
		0	6.9808	0.199154			0	6.9808	0.143177
		0	6.99104	0.106575			0	6.99104	0.110512
		0	7.00128	0.12994			0	7.00128	0.132042
		0	7.01152	0.154686			0	7.01152	0.23933
		0	7.02176	0.126568			0	7.02176	0.283581
		0	7.032	0.0685959			0	7.032	0.326912
		0	7.04224	0.143291			0	7.04224	0.257069
		0	7.05248	0.250763			0	7.05248	0.247818
		0	7.06272	0.226929			0	7.06272	0.263824
		0	7.07296	0.177002			0	7.07296	0.348248
		0	7.0832	0.13559			0	7.0832	0.337032
		0	7.09344	0.103157			0	7.09344	0.299221
		0	7.10368	0.0333939			0	7.10368	0.265797
		0	7.11392	-0.00634766			0	7.11392	0.255123
		0	7.12416	0.0926666			0	7.12416	0.316994
		0	7.1344	0.118187			0	7.1344	0.205143
		0	7.14464	0.109699			0	7.14464	0.175648
		0	7.15488	0.0963135			0	7.15488	0.0961838
		0	7.16512	0.0683098			0	7.16512	0.140873
		0	7.17536	0.127319			0	7.17536	0.128727
		0	7.1856	0.0662727			0	7.1856	0.192158
		0	7.19584	0.142029			0	7.19584	0.310329
		0	7.20608	0.110844			0	7.20608	0.265697
		0	7.21632	0.128677			0	7.21632	0.0854073
		0	7.22656	0.170296			0	7.22656	0.161129
		0	7.2368	0.0877762			0	7.2368	0.159397
		0	7.24704	-0.0133362			0	7.24704	0.14967
		0	7.25728	-0.0449142			0	7.25728	0.185207
		0	7.26752	-0.0881882			0	7.26752	0.190868
		0	7.27776	-0.119278			0	7.27776	0.203506
		0	7.288	-0.189335			0	7.288	0.119225
		0	7.29824	-0.105103			0	7.29824	0.117912
		0	7.30848	0.00178146			0	7.30848	0.128586
		0	7.31872	0.00556946			0	7.31872	0.141518
		0	7.32896	-0.0504951			0	7.32896	0.0708275
		0	7.3392	-0.120956			0	7.3392	-0.0223808
		0	7.34944	-0.0577278			0	7.34944	-0.121494
		0	7.35968	-0.0269623			0	7.35968	-0.207443
		0	7.36992	-0.028141			0	7.36992	-0.146381
		0	7.38016	-0.127003			0	7.38016	-0.0983887
		0	7.3904	-0.137955			0	7.3904	-0.0929222
		0	7.40064	-0.110268			0	7.40064	-0.00503922
		0	7.41088	-0.05439			0	7.41088	-0.0704956
		0	7.42112	-0.116108			0	7.42112	-0.0968552
		0	7.43136	-0.174496			0	7.43136	-0.0242424
		0	7.4416	-0.18475			0	7.4416	-0.0350304
		0	7.45184	-0.219509			0	7.45184	-0.0933037
		0	7.46208	-0.241287			0	7.46208	-0.00855255
		0	7.47232	-0.297569			0	7.47232	-0.0281181
		0	7.48256	-0.256584			0	7.48256	-0.0817604
		0	7.4928	-0.29195			0	7.4928	-0.0763359
		0	7.50304	-0.309952			0	7.50304	-0.069706
		0	7.51328	-0.269253			0	7.51328	-0.0140762
		0	7.52352	-0.189182			0	7.52352	-0.0118332
		0	7.53376	-0.229008			0	7.53376	0.0199699
		0	7.544	-0.293945			0	7.544	-0.00886154
		0	7.55424	-0.28487			0	7.55424	0.0996017
		0	7.56448	-0.336346			0	7.56448	0.22971
		0	7.57472	-0.278137			0	7.57472	0.242939
		0	7.58496	-0.385983			0	7.58496	0.199928
		0	7.5952	-0.471184			0	7.5952	0.196018
		0	7.60544	-0.438591			0	7.60544	0.27615
		0	7.61568	-0.482605			0	7.61568	0.331562
		0	7.62592	-0.546524			0	7.62592	0.332897
		0	7.63616	-0.579819			0	7.63616	0.365105
		0	7.6464	-0.499199			0	7.6464	0.357086
		0	7.65664	-0.466377			0	7.65664	0.321442
		0	7.66688	-0.51535			0	7.66688	0.344711
		0	7.67712	-0.528271			0	7.67712	0.361244
		0	7.68736	-0.490089			0	7.68736	0.31673
		0	7.6976	-0.447853			0	7.6976	0.230255
		0	7.70784	-0.462708			0	7.70784	0.250713
		0	7.71808	-0.516247			0	7.71808	0.192791
		0	7.72832	-0.486252			0	7.72832	0.202789
		0	7.73856	-0.500114			0	7.73856	0.177517
		0	7.7488	-0.43306			0	7.7488	0.194279
		0	7.75904	-0.388359			0	7.75904	0.25087
		0	7.76928	-0.556953			0	7.76928	0.181263
		0	7.77952	-0.559544			0	7.77952	0.284805
		0	7.78976	-0.551018			0	7.78976	0.256794
		0	7.8	-0.543022			0	7.8	0.111683
		0	7.81024	-0.467228			0	7.81024	0.119488
		0	7.82048	-0.458096			0	7.82048	0.186878
		0	7.83072	-0.472519			0	7.83072	0.119225
		0	7.84096	-0.498318			0	7.84096	0.0921783
		0	7.8512	-0.476547			0	7.8512	0.0974312
		0	7.86144	-0.414726			0	7.86144	0.0566406
		0	7.87168	-0.479942			0	7.87168	0.0105286
		0	7.88192	-0.520618			0	7.88192	0.0624733
		0	7.89216	-0.493763			0	7.89216	0.0253716
		0	7.9024	-0.498173			0	7.9024	0.135269
		0	7.91264	-0.49847			0	7.91264	0.174458
		0	7.92288	-0.458607			0	7.92288	0.175625
		0	7.93312	-0.463127			0	7.93312	0.170128
		0	7.94336	-0.46714			0	7.94336	0.119858
		0	7.9536	-0.476845			0	7.9536	0.0819511
		0	7.96384	-0.622223			0	7.96384	0.136478
		0	7.97408	-0.697311			0	7.97408	0.211327
		0	7.98432	-0.686142			0	7.98432	0.0925446
		0	7.99456	-0.758835			0	7.99456	-0.0495377
		0	8.0048	-0.854382			0	8.0048	-0.00349808
		0	8.01504	-0.833652			0	8.01504	0.128941
		0	8.02528	-0.866699			0	8.02528	0.177921
		0	8.03552	-0.872238			0	8.03552	0.164417
		0	8.04576	-0.833805			0	8.04576	0.0415726
		0	8.056	-0.85442			0	8.056	0.0630684
		0	8.06624	-0.804695			0	8.06624	0.0520859
		0	8.07648	-0.832016			0	8.07648	-0.0883446
		0	8.08672	-0.922607			0	8.08672	-0.121277
		0	8.09696	-1.06123			0	8.09696	-0.0722237
		0	8.1072	-1.04123			0	8.1072	-0.025959
		0	8.11744	-1.0347			0	8.11744	-0.0551643
		0	8.12768	-0.943611			0	8.12768	0.0146065
		0	8.13792	-0.843403			0	8.13792	0.0876122
		0	8.14816	-0.765583			0	8.14816	0.162354
		0	8.1584	-0.734589			0	8.1584	0.124008
		0	8.16864	-0.672516			0	8.16864	0.0502739
		0	8.17888	-0.626015			0	8.17888	-0.0123329
		0	8.18912	-0.650986			0	8.18912	-0.0126534
		0	8.19936	-0.720428			0	8.19936	0.0711746
		0	8.2096	-0.672493			0	8.2096	0.0164795
		0	8.21984	-0.672459			0	8.21984	-0.0390701
		0	8.23008	-0.604794			0	8.23008	-0.122875
		0	8.24032	-0.589653			0	8.24032	-0.0679207
		0	8.25056	-0.596458			0	8.25056	-0.047081
		0	8.2608	-0.491905			0	8.2608	-0.0366554
		0	8.27104	-0.395725			0	8.27104	-0.00721741
		0	8.28128	-0.403557			0	8.28128	-0.0411606
		0	8.29152	-0.366352			0	8.29152	-0.136513
		0	8.30176	-0.295471			0	8.30176	-0.199074
		0	8.312	-0.351677			0	8.312	-0.0700188
		0	8.32224	-0.417191			0	8.32224	-0.0208702
		0	8.33248	-0.472542			0	8.33248	-0.00936508
		0	8.34272	-0.403473			0	8.34272	-0.0778542
		0	8.35296	-0.466545			0	8.35296	-0.0568466
		0	8.3632	-0.585339			0	8.3632	-0.0679893
		0	8.37344	-0.522945			0	8.37344	0.000514984
		0	8.38368	-0.382168			0	8.38368	-0.0141335
		0	8.39392	-0.379784			0	8.39392	-0.0966988
		0	8.40416	-0.304722			0	8.40416	-0.162086
		0	8.4144	-0.288853			0	8.4144	-0.186573
		0	8.42464	-0.293922			0	8.42464	-0.254436
		0	8.43488	-0.241692			0	8.43488	-0.219975
		0	8.44512	-0.2173			0	8.44512	-0.073307
		0	8.45536	-0.18116			0	8.45536	-0.0837402
		0	8.4656	-0.17347			0	8.4656	-0.0288429
		0	8.47584	-0.199863			0	8.47584	-0.069294
		0	8.48608	-0.237137			0	8.48608	-0.103825
		0	8.49632	-0.379917			0	8.49632	0.00279617
		0	8.50656	-0.403687			0	8.50656	-0.0517311
		0	8.5168	-0.37566			0	8.5168	-0.059597
		0	8.52704	-0.325497			0	8.52704	-0.109833
		0	8.53728	-0.250275			0	8.53728	-0.0686836
		0	8.54752	-0.258118			0	8.54752	-0.0179253
		0	8.55776	-0.260406			0	8.55776	0.0455437
		0	8.568	-0.276337			0	8.568	0.119869
		0	8.57824	-0.255798			0	8.57824	0.0105553
		0	8.58848	-0.197193			0	8.58848	-0.0858154
		0	8.59872	-0.166306			0	8.59872	-0.0718193
		0	8.60896	-0.110435			0	8.60896	-0.0515785
		0	8.6192	-0.139626			0	8.6192	-0.101276
		0	8.62944	-0.212177			0	8.62944	-0.112686
		0	8.63968	-0.255547			0	8.63968	-0.0480003
		0	8.64992	-0.247715			0	8.64992	0.026432
		0	8.66016	-0.233231			0	8.66016	0.0546379
		0	8.6704	-0.247368			0	8.6704	0.0347672
		0	8.68064	-0.323185			0	8.68064	-0.0822029
		0	8.69088	-0.343376			0	8.69088	-0.0756111
		0	8.70112	-0.318882			0	8.70112	0.0408325
		0	8.71136	-0.250885			0	8.71136	0.0717697
		0	8.7216	-0.196358			0	8.7216	0.032177
		0	8.73184	-0.22876			0	8.73184	0.0641632
		0	8.74208	-0.199627			0	8.74208	0.00840759
		0	8.75232	-0.194794			0	8.75232	-0.0401802
		0	8.76256	-0.264236			0	8.76256	-0.0284042
		0	8.7728	-0.313446			0	8.7728	-0.00841141
		0	8.78304	-0.208626			0	8.78304	-0.0362015
		0	8.79328	-0.100479			0	8.79328	-0.0357323
		0	8.80352	-0.0531654			0	8.80352	0.00726318
		0	8.81376	-0.146324			0	8.81376	0.0770378
		0	8.824	-0.138908			0	8.824	0.0293884
		0	8.83424	-0.163132			0	8.83424	0.0687027
		0	8.84448	-0.17905			0	8.84448	0.0279961
		0	8.85472	-0.215706			0	8.85472	-0.0680046
		0	8.86496	-0.177223			0	8.86496	-0.129505
		0	8.8752	-0.156837			0	8.8752	-0.098484
		0	8.88544	-0.0402985			0	8.88544	-0.0366631
		0	8.89568	-0.0853615			0	8.89568	0.0304527
		0	8.90592	-0.179192			0	8.90592	0.0807686
		0	8.91616	-0.12339			0	8.91616	0.122696
		0	8.9264	-0.0474434			0	8.9264	0.140625
		0	8.93664	-0.0452271			0	8.93664	0.126106
		0	8.94688	-0.122353			0	8.94688	0.0446243
		0	8.95712	-0.210125			0	8.95712	-0.0281258
		0	8.96736	-0.207813			0	8.96736	-0.0882721
		0	8.9776	-0.194294			0	8.9776	-0.160774
		0	8.98784	-0.199005			0	8.98784	-0.0420418
		0	8.99808	-0.230431			0	8.99808	0.0407295
		0	9.00832	-0.205906			0	9.00832	0.0230446
		0	9.01856	-0.266838			0	9.01856	0.117355
		0	9.0288	-0.546669			0	9.0288	0.101154
		0	9.03904	-0.4613			0	9.03904	0.0862427
		0	9.04928	-0.322994			0	9.04928	-0.0429497
		0	9.05952	-0.203369			0	9.05952	-0.144833
		0	9.06976	-0.119217			0	9.06976	-0.0589714
		0	9.08	-0.181587			0	9.08	-0.0772552
		0	9.09024	-0.191029			0	9.09024	-0.0904655
		0	9.10048	-0.155479			0	9.10048	0.0330734
		0	9.11072	-0.212215			0	9.11072	0.118023
		0	9.12096	-0.198254			0	9.12096	0.125866
		0	9.1312	-0.145599			0	9.1312	0.0636406
		0	9.14144	-0.132893			0	9.14144	0.0982094
		0	9.15168	-0.121338			0	9.15168	-0.00959396
		0	9.16192	-0.11068			0	9.16192	-0.102612
		0	9.17216	-0.208282			0	9.17216	-0.183434
		0	9.1824	-0.229607			0	9.1824	-0.126156
		0	9.19264	-0.270771			0	9.19264	-0.0536041
		0	9.20288	-0.25227			0	9.20288	-0.0732765
		0	9.21312	-0.12698			0	9.21312	-0.0912132
		0	9.22336	-0.0606995			0	9.22336	-0.0999298
		0	9.2336	-0.0568695			0	9.2336	-0.055275
		0	9.24384	-0.101814			0	9.24384	-0.14127
		0	9.25408	-0.153049			0	9.25408	-0.0957832
		0	9.26432	-0.182411			0	9.26432	-0.101154
		0	9.27456	-0.223705			0	9.27456	-0.129719
		0	9.2848	-0.181934			0	9.2848	-0.216
		0	9.29504	-0.28611			0	9.29504	-0.230854
		0	9.30528	-0.285706			0	9.30528	-0.181644
		0	9.31552	-0.315807			0	9.31552	-0.100098
		0	9.32576	-0.28685			0	9.32576	-0.0542488
		0	9.336	-0.210815			0	9.336	-0.0587158
		0	9.34624	-0.18792			0	9.34624	-0.0930977
		0	9.35648	0.000358582			0	9.35648	-0.0699844
		0	9.36672	-0.041481			0	9.36672	-0.419159
		0	9.37696	0.052681			0	9.37696	-0.584309
		0	9.3872	0.0448608			0	9.3872	-0.4459
		0	9.39744	0.0222626			0	9.39744	-0.295513
		0	9.40768	-0.0902634			0	9.40768	-0.155346
		0	9.41792	-0.16272			0	9.41792	-0.0352821
		0	9.42816	-0.123905			0	9.42816	-0.0120735
		0	9.4384	-0.0043869			0	9.4384	0.0327721
		0	9.44864	0.141853			0	9.44864	0.0741539
		0	9.45888	0.151031			0	9.45888	0.0795021
		0	9.46912	0.152306			0	9.46912	0.0917244
		0	9.47936	0.0944862			0	9.47936	0.0474281
		0	9.4896	0.00972748			0	9.4896	0.00248337
		0	9.49984	0.0488777			0	9.49984	-0.00669479
		0	9.51008	0.0204964			0	9.51008	-0.0696259
		0	9.52032	-0.0204544			0	9.52032	-0.134106
		0	9.53056	-0.0167923			0	9.53056	-0.161953
		0	9.5408	0.013401			0	9.5408	-0.122398
		0	9.55104	0.0384254			0	9.55104	-0.0614357
		0	9.56128	0.00524902			0	9.56128	-0.0470009
		0	9.57152	0.0180893			0	9.57152	-0.144657
		0	9.58176	0.00107574			0	9.58176	-0.287289
		0	9.592	-0.0831108			0	9.592	-0.252075
		0	9.60224	-0.095295			0	9.60224	-0.109062
		0	9.61248	-0.127792			0	9.61248	-0.0302391
		0	9.62272	-0.174904			0	9.62272	-0.100883
		0	9.63296	-0.160461			0	9.63296	-0.103539
		0	9.6432	-0.0122986			0	9.6432	-0.0320396
		0	9.65344	0.0161896			0	9.65344	0.0165596
		0	9.66368	0.0467949			0	9.66368	0.0587845
		0	9.67392	0.052803			0	9.67392	0.0713882
		0	9.68416	0.0842819			0	9.68416	0.0249443
		0	9.6944	0.0473747			0	9.6944	-0.00592041
		0	9.70464	0.0384026			0	9.70464	0.0354347
		0	9.71488	0.0635643			0	9.71488	0.0219498
		0	9.72512	0.0380669			0	9.72512	0.0439796
		0	9.73536	0.0368042			0	9.73536	-0.0663109
		0	9.7456	0.0610504			0	9.7456	-0.165493
		0	9.75584	0.0153694			0	9.75584	-0.231369
		0	9.76608	-0.0228386			0	9.76608	-0.250072
		0	9.77632	-0.0514336			0	9.77632	-0.267826
		0	9.78656	-0.00798416			0	9.78656	-0.196404
		0	9.7968	-0.033783			0	9.7968	-0.0289268
		0	9.80704	0.0195656			0	9.80704	-0.0561905
		0	9.81728	0.0888596			0	9.81728	-0.087101
		0	9.82752	0.0935478			0	9.82752	-0.0655365
		0	9.83776	0.0205536			0	9.83776	-0.0603065
		0	9.848	0.0160599			0	9.848	-0.0914421
		0	9.85824	0.108757			0	9.85824	-0.0322304
		0	9.86848	0.127548			0	9.86848	-0.0628319
		0	9.87872	0.122253			0	9.87872	-0.0813408
		0	9.88896	0.134533			0	9.88896	-0.0950508
		0	9.8992	0.178982			0	9.8992	-0.0536156
		0	9.90944	0.362659			0	9.90944	-0.0140495
		0	9.91968	0.297405			0	9.91968	-0.0954247
		0	9.92992	0.157524			0	9.92992	-0.164742
		0	9.94016	0.122478			0	9.94016	-0.0829659
		0	9.9504	0.131813			0	9.9504	-0.0518494
		0	9.96064	0.14999			0	9.96064	-0.0253029
		0	9.97088	0.139191			0	9.97088	-0.0908928
		0	9.98112	0.161354			0	9.98112	-0.154621
		0	9.99136	0.230576			0	9.99136	-0.074501
		0	10.0016	0.213886			0	10.0016	-0.0347214
		0	10.0118	0.168777			0	10.0118	0.0536499
		0	10.0221	0.108196			0	10.0221	0.13744
		0	10.0323	0.096611			0	10.0323	0.0892563
		0	10.0426	0.125732			0	10.0426	0.0224991
		0	10.0528	0.117901			0	10.0528	0.036396
		0	10.063	0.0299149			0	10.063	0.0752602
		0	10.0733	-0.130829			0	10.0733	0.0924263
		0	10.0835	-0.0399323			0	10.0835	-0.0474396
		0	10.0938	-0.0619392			0	10.0938	-0.129837
		0	10.104	-0.0135498			0	10.104	-0.0710411
		0	10.1142	0.0709534			0	10.1142	0.0415726
		0	10.1245	0.0974808			0	10.1245	0.0666199
		0	10.1347	0.0633392			0	10.1347	-0.0708427
		0	10.145	0.089386			0	10.145	-0.0168991
		0	10.1552	0.0681305			0	10.1552	-0.0744896
		0	10.1654	0.199749			0	10.1654	-0.0567055
		0	10.1757	0.244476			0	10.1757	-0.0530891
		0	10.1859	0.225082			0	10.1859	-0.0124321
		0	10.1962	0.124027			0	10.1962	-0.00866318
		0	10.2064	0.0655899			0	10.2064	0.0147514
		0	10.2166	0.171997			0	10.2166	-0.0656776
		0	10.2269	0.239342			0	10.2269	-0.0809059
		0	10.2371	0.180103			0	10.2371	-0.120838
		0	10.2474	0.145126			0	10.2474	-0.0569534
		0	10.2576	0.126163			0	10.2576	0.00843048
		0	10.2678	0.2062			0	10.2678	0.0934906
		0	10.2781	0.263			0	10.2781	0.0594292
		0	10.2883	0.340248			0	10.2883	0.0209389
		0	10.2986	0.253979			0	10.2986	-0.050251
		0	10.3088	0.257446			0	10.3088	-0.0301933
		0	10.319	0.249863			0	10.319	-0.0477638
		0	10.3293	0.267639			0	10.3293	-0.0134163
		0	10.3395	0.240326			0	10.3395	0.0995216
		0	10.3498	0.2402			0	10.3498	0.0704689
		0	10.36	0.159622			0	10.36	0.177078
		0	10.3702	0.221325			0	10.3702	0.135128
		0	10.3805	0.195496			0	10.3805	0.0616455
		0	10.3907	0.212135			0	10.3907	0.0558281
		0	10.401	0.201561			0	10.401	0.00118256
		0	10.4112	0.10331			0	10.4112	0.118904
		0	10.4214	0.0401535			0	10.4214	0.190979
		0	10.4317	0.134365			0	10.4317	0.182095
		0	10.4419	0.116364			0	10.4419	0.103153
		0	10.4522	0.111858			0	10.4522	0.149326
		0	10.4624	0.15966			0	10.4624	0.259907
		0	10.4726	0.234573			0	10.4726	0.260059
		0	10.4829	0.300255			0	10.4829	0.256363
		0	10.4931	0.218647			0	10.4931	0.219456
		0	10.5034	0.135303			0	10.5034	0.213806
		0	10.5136	0.150482			0	10.5136	0.190121
		0	10.5238	0.121681			0	10.5238	0.216999
		0	10.5341	0.119987			0	10.5341	0.186306
		0	10.5443	0.117962			0	10.5443	0.0864182
		0	10.5546	0.0947495			0	10.5546	0.0163689
		0	10.5648	0.141003			0	10.5648	0.0113792
		0	10.575	0.154179			0	10.575	0.011116
		0	10.5853	0.146381			0	10.5853	-0.0220604
		0	10.5955	0.105614			0	10.5955	-0.0233574
		0	10.6058	0.0498314			0	10.6058	-0.0375938
		0	10.616	0.0803871			0	10.616	-0.0303917
		0	10.6262	-0.0107613			0	10.6262	-0.0516357
		0	10.6365	0.131264			0	10.6365	-0.175388
		0	10.6467	0.194386			0	10.6467	-0.158352
		0	10.657	0.208023			0	10.657	-0.0344124
		0	10.6672	0.211552			0	10.6672	-0.0392761
		0	10.6774	0.178055			0	10.6774	-0.160427
		0	10.6877	0.228779			0	10.6877	-0.208111
		0	10.6979	0.253204			0	10.6979	-0.246258
		0	10.7082	0.221985			0	10.7082	-0.22649
		0	10.7184	0.168064			0	10.7184	-0.248131
		0	10.7286	0.205685			0	10.7286	-0.269543
		0	10.7389	0.298096			0	10.7389	-0.260433
		0	10.7491	0.298325			0	10.7491	-0.262779
		0	10.7594	0.159447			0	10.7594	-0.347393
		0	10.7696	0.173809			0	10.7696	-0.381432
		0	10.7798	0.142696			0	10.7798	-0.289505
		0	10.7901	0.184681			0	10.7901	-0.23119
		0	10.8003	0.206631			0	10.8003	-0.270756
		0	10.8106	0.204937			0	10.8106	-0.2822
		0	10.8208	0.214649			0	10.8208	-0.290234
		0	10.831	0.187984			0	10.831	-0.290485
		0	10.8413	0.21109			0	10.8413	-0.263294
		0	10.8515	0.214172			0	10.8515	-0.253639
		0	10.8618	0.255005			0	10.8618	-0.233994
		0	10.872	0.250534			0	10.872	-0.203548
		0	10.8822	0.209946			0	10.8822	-0.241215
		0	10.8925	0.277428			0	10.8925	-0.299473
		0	10.9027	0.398304			0	10.9027	-0.308044
		0	10.913	0.365513			0	10.913	-0.290531
		0	10.9232	0.233879			0	10.9232	-0.266346
		0	10.9334	0.174549			0	10.9334	-0.190037
		0	10.9437	0.223854			0	10.9437	-0.111767
		0	10.9539	0.200726			0	10.9539	-0.0620308
		0	10.9642	0.258392			0	10.9642	-0.134224
		0	10.9744	0.24733			0	10.9744	-0.171345
		0	10.9846	0.228325			0	10.9846	-0.162659
		0	10.9949	0.267616			0	10.9949	-0.0317039
		0	11.0051	0.25808			0	11.0051	0.0397606
		0	11.0154	0.304787			0	11.0154	0.076561
		0	11.0256	0.354507			0	11.0256	-0.0569649
		0	11.0358	0.412788			0	11.0358	-0.0290337
		0	11.0461	0.369171			0	11.0461	-0.0625305
		0	11.0563	0.300743			0	11.0563	-0.0869102
		0	11.0666	0.341885			0	11.0666	-0.0908546
		0	11.0768	0.305931			0	11.0768	-0.0513153
		0	11.087	0.370697			0	11.087	-0.0580978
		0	11.0973	0.417847			0	11.0973	-0.0622673
		0	11.1075	0.361824			0	11.1075	-0.0668716
		0	11.1178	0.275352			0	11.1178	-0.116177
		0	11.128	0.313187			0	11.128	-0.0735855
		0	11.1382	0.30761			0	11.1382	-0.0663834
		0	11.1485	0.320152			0	11.1485	-0.0544395
		0	11.1587	0.396446			0	11.1587	-0.0509682
		0	11.169	0.457901			0	11.169	-0.0442352
		0	11.1792	0.496429			0	11.1792	-0.0556068
		0	11.1894	0.500969			0	11.1894	-0.0219536
		0	11.1997	0.53474			0	11.1997	0.0110931
		0	11.2099	0.539154			0	11.2099	-0.0299873
		0	11.2202	0.593975			0	11.2202	0.0535889
		0	11.2304	0.648144			0	11.2304	0.0461884
		0	11.2406	0.666454			0	11.2406	0.0883865
		0	11.2509	0.625484			0	11.2509	0.0596657
		0	11.2611	0.550953			0	11.2611	0.065403
		0	11.2714	0.610344			0	11.2714	0.101025
		0	11.2816	0.55286			0	11.2816	0.0508842
		0	11.2918	0.567318			0	11.2918	0.0248985
		0	11.3021	0.561787			0	11.3021	-0.014576
		0	11.3123	0.539413			0	11.3123	-0.0453186
		0	11.3226	0.539032			0	11.3226	-0.0246849
		0	11.3328	0.434376			0	11.3328	-0.0156021
		0	11.343	0.346893			0	11.343	0.0238342
		0	11.3533	0.334732			0	11.3533	-0.0270538
		0	11.3635	0.357738			0	11.3635	-0.0312157
		0	11.3738	0.276115			0	11.3738	0.0481033
		0	11.384	0.250999			0	11.384	0.0711594
		0	11.3942	0.294163			0	11.3942	0.0246925
		0	11.4045	0.304859			0	11.4045	0.069561
		0	11.4147	0.283768			0	11.4147	0.0505753
		0	11.425	0.372173			0	11.425	-0.0294533
		0	11.4352	0.374714			0	11.4352	-0.0209045
		0	11.4454	0.285294			0	11.4454	0.0241432
		0	11.4557	0.248093			0	11.4557	0.0408707
		0	11.4659	0.321056			0	11.4659	0.0907707
		0	11.4762	0.370399			0	11.4762	0.146999
		0	11.4864	0.400299			0	11.4864	0.0211143
		0	11.4966	0.340691			0	11.4966	-0.0149803
		0	11.5069	0.327698			0	11.5069	-0.0821037
		0	11.5171	0.377884			0	11.5171	-0.113903
		0	11.5274	0.468185			0	11.5274	-0.137196
		0	11.5376	0.479008			0	11.5376	-0.043457
		0	11.5478	0.480335			0	11.5478	0.0211372
		0	11.5581	0.454689			0	11.5581	0.0114746
		0	11.5683	0.360218			0	11.5683	-0.117023
		0	11.5786	0.315491			0	11.5786	-0.141582
		0	11.5888	0.277664			0	11.5888	-0.160069
		0	11.599	0.291935			0	11.599	-0.146469
		0	11.6093	0.313488			0	11.6093	-0.126656
		0	11.6195	0.387741			0	11.6195	-0.0704842
		0	11.6298	0.323788			0	11.6298	-0.118202
		0	11.64	0.428799			0	11.64	-0.0485992
		0	11.6502	0.559616			0	11.6502	0.0110054
		0	11.6605	0.620285			0	11.6605	-0.0206642
		0	11.6707	0.571457			0	11.6707	-0.0486717
		0	11.681	0.653545			0	11.681	-0.134605
		0	11.6912	0.697746			0	11.6912	-0.149689
		0	11.7014	0.647465			0	11.7014	-0.124153
		0	11.7117	0.517727			0	11.7117	-0.178547
		0	11.7219	0.520889			0	11.7219	-0.114735
		0	11.7322	0.438133			0	11.7322	-0.0149651
		0	11.7424	0.44849			0	11.7424	-0.101776
		0	11.7526	0.355522			0	11.7526	-0.112232
		0	11.7629	0.405422			0	11.7629	-0.111385
		0	11.7731	0.484341			0	11.7731	-0.0869713
		0	11.7834	0.442497			0	11.7834	-0.0989761
		0	11.7936	0.475113			0	11.7936	-0.0734406
		0	11.8038	0.414055			0	11.8038	0.0105286
		0	11.8141	0.478237			0	11.8141	-0.0373306
		0	11.8243	0.544804			0	11.8243	-0.105293
		0	11.8346	0.499622			0	11.8346	-0.23571
		0	11.8448	0.524857			0	11.8448	-0.152836
		0	11.855	0.476887			0	11.855	-0.136463
		0	11.8653	0.566643			0	11.8653	-0.044735
		0	11.8755	0.592926			0	11.8755	-0.112789
		0	11.8858	0.627533			0	11.8858	-0.128429
		0	11.896	0.63385			0	11.896	-0.0470963
		0	11.9062	0.657242			0	11.9062	0.0421562
		0	11.9165	0.65419			0	11.9165	0.0971375
		0	11.9267	0.605083			0	11.9267	0.155121
		0	11.937	0.636665			0	11.937	0.0956459
		0	11.9472	0.685707			0	11.9472	-0.0297165
		0	11.9574	0.714233			0	11.9574	0.0298309
		0	11.9677	0.62516			0	11.9677	0.100452
		0	11.9779	0.571564			0	11.9779	0.110893
		0	11.9882	0.529091			0	11.9882	0.0686302
		0	11.9984	0.453857			0	11.9984	0.0532913
		0	3.00768	0.166142			0	3.00768	-0.147572
		0	3.01792	0.191391			0	3.01792	-0.108231
		0	3.02816	0.148285			0	3.02816	-0.0900269
		0	3.0384	0.142155			0	3.0384	-0.150082
		0	3.04864	0.199081			0	3.04864	-0.215935
		0	3.05888	0.154552			0	3.05888	-0.198147
		0	3.06912	0.0320473			0	3.06912	-0.151276
		0	3.07936	0.070858			0	3.07936	-0.138855
		0	3.0896	0.0572319			0	3.0896	-0.110077
		0	3.09984	0.0185127			0	3.09984	-0.088253
		0	3.11008	0.0307121			0	3.11008	-0.12579
		0	3.12032	0.0295296			0	3.12032	-0.0263329
		0	3.13056	0.165726			0	3.13056	-0.0483894
		0	3.1408	0.224091			0	3.1408	-0.0384331
		0	3.15104	0.237278			0	3.15104	0.0212517
		0	3.16128	0.203598			0	3.16128	0.0110016
		0	3.17152	0.359238			0	3.17152	0.0457764
		0	3.18176	0.378944			0	3.18176	0.0745773
		0	3.192	0.418125			0	3.192	0.159573
		0	3.20224	0.425636			0	3.20224	0.217545
		0	3.21248	0.350384			0	3.21248	0.0809288
		0	3.22272	0.341488			0	3.22272	0.0744133
		0	3.23296	0.300228			0	3.23296	0.0450249
		0	3.2432	0.346695			0	3.2432	0.0319977
		0	3.25344	0.322392			0	3.25344	-0.0120049
		0	3.26368	0.238956			0	3.26368	-0.100674
		0	3.27392	0.2509			0	3.27392	-0.122234
		0	3.28416	0.209213			0	3.28416	-0.0695114
		0	3.2944	0.293949			0	3.2944	-0.045681
		0	3.30464	0.363934			0	3.30464	-0.109257
		0	3.31488	0.333572			0	3.31488	-0.086441
		0	3.32512	0.316242			0	3.32512	-0.0846367
		0	3.33536	0.262417			0	3.33536	-0.0996361
		0	3.3456	0.259045			0	3.3456	-0.141445
		0	3.35584	0.302254			0	3.35584	-0.0640984
		0	3.36608	0.250782			0	3.36608	-0.0234985
		0	3.37632	0.23737			0	3.37632	-0.0190392
		0	3.38656	0.238945			0	3.38656	-0.0671387
		0	3.3968	0.207283			0	3.3968	0.0208397
		0	3.40704	0.171402			0	3.40704	-0.0253563
		0	3.41728	0.235546			0	3.41728	-0.0266762
		0	3.42752	0.322414			0	3.42752	0.0598907
		0	3.43776	0.39027			0	3.43776	0.0989189
		0	3.448	0.413036			0	3.448	0.0117874
		0	3.45824	0.361492			0	3.45824	-0.000919342
		0	3.46848	0.370632			0	3.46848	0.0542984
		0	3.47872	0.282917			0	3.47872	0.0370827
		0	3.48896	0.322544			0	3.48896	-0.0217896
		0	3.4992	0.259315			0	3.4992	-0.125134
		0	3.50944	0.24593			0	3.50944	-0.098671
		0	3.51968	0.181866			0	3.51968	-0.0462036
		0	3.52992	0.206902			0	3.52992	-0.0201683
		0	3.54016	0.21043			0	3.54016	-0.119747
		0	3.5504	0.211464			0	3.5504	-0.155437
		0	3.56064	0.28043			0	3.56064	-0.134552
		0	3.57088	0.248459			0	3.57088	-0.191799
		0	3.58112	0.23521			0	3.58112	-0.216618
		0	3.59136	0.226498			0	3.59136	-0.27
		0	3.6016	0.259758			0	3.6016	-0.319805
		0	3.61184	0.225006			0	3.61184	-0.30619
		0	3.62208	0.232517			0	3.62208	-0.217628
		0	3.63232	0.27354			0	3.63232	-0.244274
		0	3.64256	0.345615			0	3.64256	-0.274288
		0	3.6528	0.313126			0	3.6528	-0.259399
		0	3.66304	0.343491			0	3.66304	-0.109364
		0	3.67328	0.24823			0	3.67328	-0.0667572
		0	3.68352	0.238132			0	3.68352	-0.116512
		0	3.69376	0.187447			0	3.69376	-0.215641
		0	3.704	0.225674			0	3.704	-0.161137
		0	3.71424	0.202564			0	3.71424	-0.0759735
		0	3.72448	0.10413			0	3.72448	-0.147259
		0	3.73472	0.0965691			0	3.73472	-0.299953
		0	3.74496	0.172985			0	3.74496	-0.23875
		0	3.7552	0.264027			0	3.7552	-0.196232
		0	3.76544	0.214542			0	3.76544	-0.186848
		0	3.77568	0.161221			0	3.77568	-0.237511
		0	3.78592	0.164036			0	3.78592	-0.220058
		0	3.79616	0.170231			0	3.79616	-0.211475
		0	3.8064	0.203049			0	3.8064	-0.227989
		0	3.81664	0.207832			0	3.81664	-0.358047
		0	3.82688	0.186802			0	3.82688	-0.322021
		0	3.83712	0.156796			0	3.83712	-0.312256
		0	3.84736	0.146702			0	3.84736	-0.323868
		0	3.8576	0.123299			0	3.8576	-0.332775
		0	3.86784	0.0563622			0	3.86784	-0.276421
		0	3.87808	0.140224			0	3.87808	-0.159374
		0	3.88832	0.216423			0	3.88832	-0.195858
		0	3.89856	0.323162			0	3.89856	-0.245155
		0	3.9088	0.273788			0	3.9088	-0.316048
		0	3.91904	0.21949			0	3.91904	-0.29311
		0	3.92928	0.286724			0	3.92928	-0.315712
		0	3.93952	0.304638			0	3.93952	-0.369968
		0	3.94976	0.26556			0	3.94976	-0.412548
		0	3.96	0.211655			0	3.96	-0.452496
		0	3.97024	0.117767			0	3.97024	-0.459873
		0	3.98048	0.1637			0	3.98048	-0.456856
		0	3.99072	0.117123			0	3.99072	-0.317978
		0	4.00096	0.116192			0	4.00096	-0.310123
		0	4.0112	0.164726			0	4.0112	-0.327682
		0	4.02144	0.189281			0	4.02144	-0.293125
		0	4.03168	0.27412			0	4.03168	-0.276756
		0	4.04192	0.215233			0	4.04192	-0.251652
		0	4.05216	0.198566			0	4.05216	-0.303783
		0	4.0624	0.178421			0	4.0624	-0.278416
		0	4.07264	0.111305			0	4.07264	-0.269115
		0	4.08288	0.0393753			0	4.08288	-0.136364
		0	4.09312	0.0824471			0	4.09312	-0.238228
		0	4.10336	0.0503578			0	4.10336	-0.240437
		0	4.1136	0.0293999			0	4.1136	-0.158752
		0	4.12384	0.0283966			0	4.12384	-0.170181
		0	4.13408	0.138962			0	4.13408	-0.320232
		0	4.14432	0.160004			0	4.14432	-0.302528
		0	4.15456	0.120865			0	4.15456	-0.275253
		0	4.1648	0.0959663			0	4.1648	-0.291275
		0	4.17504	-0.0403404			0	4.17504	-0.379726
		0	4.18528	-0.0356636			0	4.18528	-0.369324
		0	4.19552	-0.0724525			0	4.19552	-0.367657
		0	4.20576	-0.0010376			0	4.20576	-0.467171
		0	4.216	-0.00435257			0	4.216	-0.41008
		0	4.22624	-0.164307			0	4.22624	-0.413311
		0	4.23648	-0.217411			0	4.23648	-0.444641
		0	4.24672	-0.173401			0	4.24672	-0.528919
		0	4.25696	-0.108406			0	4.25696	-0.588036
		0	4.2672	-0.151348			0	4.2672	-0.55505
		0	4.27744	-0.271069			0	4.27744	-0.524296
		0	4.28768	-0.361465			0	4.28768	-0.574848
		0	4.29792	-0.323166			0	4.29792	-0.57819
		0	4.30816	-0.32822			0	4.30816	-0.593349
		0	4.3184	-0.216198			0	4.3184	-0.601696
		0	4.32864	-0.153984			0	4.32864	-0.623882
		0	4.33888	-0.262283			0	4.33888	-0.62772
		0	4.34912	-0.297344			0	4.34912	-0.607883
		0	4.35936	-0.284088			0	4.35936	-0.613045
		0	4.3696	-0.252365			0	4.3696	-0.642597
		0	4.37984	-0.158344			0	4.37984	-0.601768
		0	4.39008	-0.0630035			0	4.39008	-0.60923
		0	4.40032	-0.118862			0	4.40032	-0.5481
		0	4.41056	-0.117481			0	4.41056	-0.574158
		0	4.4208	-0.169979			0	4.4208	-0.650799
		0	4.43104	-0.16576			0	4.43104	-0.56237
		0	4.44128	-0.22229			0	4.44128	-0.493896
		0	4.45152	-0.332916			0	4.45152	-0.568272
		0	4.46176	-0.39159			0	4.46176	-0.648537
		0	4.472	-0.344513			0	4.472	-0.710342
		0	4.48224	-0.256657			0	4.48224	-0.718853
		0	4.49248	-0.26125			0	4.49248	-0.710651
		0	4.50272	-0.230061			0	4.50272	-0.655376
		0	4.51296	-0.19809			0	4.51296	-0.600735
		0	4.5232	-0.295422			0	4.5232	-0.623978
		0	4.53344	-0.350353			0	4.53344	-0.506329
		0	4.54368	-0.295231			0	4.54368	-0.487556
		0	4.55392	-0.223003			0	4.55392	-0.459694
		0	4.56416	-0.224651			0	4.56416	-0.505829
		0	4.5744	-0.290287			0	4.5744	-0.513233
		0	4.58464	-0.374996			0	4.58464	-0.53159
		0	4.59488	-0.358627			0	4.59488	-0.502171
		0	4.60512	-0.365891			0	4.60512	-0.416649
		0	4.61536	-0.25568			0	4.61536	-0.276222
		0	4.6256	-0.309681			0	4.6256	-0.189304
		0	4.63584	-0.355686			0	4.63584	-0.254311
		0	4.64608	-0.365185			0	4.64608	-0.241745
		0	4.65632	-0.454353			0	4.65632	-0.264874
		0	4.66656	-0.497257			0	4.66656	-0.257656
		0	4.6768	-0.414433			0	4.6768	-0.203194
		0	4.68704	-0.373875			0	4.68704	-0.258732
		0	4.69728	-0.427242			0	4.69728	-0.343052
		0	4.70752	-0.45327			0	4.70752	-0.330448
		0	4.71776	-0.403187			0	4.71776	-0.208916
		0	4.728	-0.434555			0	4.728	-0.113129
		0	4.73824	-0.592457			0	4.73824	0.00201416
		0	4.74848	-0.59576			0	4.74848	0.0390282
		0	4.75872	-0.632393			0	4.75872	0.124657
		0	4.76896	-0.53334			0	4.76896	0.101688
		0	4.7792	-0.565708			0	4.7792	0.0915871
		0	4.78944	-0.550316			0	4.78944	-0.0145683
		0	4.79968	-0.538601			0	4.79968	-0.104759
		0	4.80992	-0.451504			0	4.80992	-0.147476
		0	4.82016	-0.508846			0	4.82016	-0.140644
		0	4.8304	-0.553699			0	4.8304	-0.00127792
		0	4.84064	-0.519287			0	4.84064	0.0355949
		0	4.85088	-0.537418			0	4.85088	0.107372
		0	4.86112	-0.586819			0	4.86112	0.204113
		0	4.87136	-0.508678			0	4.87136	0.176575
		0	4.8816	-0.675961			0	4.8816	0.174477
		0	4.89184	-0.766788			0	4.89184	0.1441
		0	4.90208	-0.753391			0	4.90208	0.113705
		0	4.91232	-0.689362			0	4.91232	0.087986
		0	4.92256	-0.709961			0	4.92256	0.012352
		0	4.9328	-0.786484			0	4.9328	-0.0314827
		0	4.94304	-0.793446			0	4.94304	0.00545883
		0	4.95328	-0.750587			0	4.95328	0.00718689
		0	4.96352	-0.729214			0	4.96352	0.0486717
		0	4.97376	-0.78727			0	4.97376	0.066124
		0	4.984	-0.730228			0	4.984	0.0242958
		0	4.99424	-0.703014			0	4.99424	0.071003
		0	5.00448	-0.665249			0	5.00448	0.0219231
		0	5.01472	-0.636051			0	5.01472	0.0531311
		0	5.02496	-0.592518			0	5.02496	0.185944
		0	5.0352	-0.593533			0	5.0352	0.203823
		0	5.04544	-0.579487			0	5.04544	0.188755
		0	5.05568	-0.601383			0	5.05568	0.142059
		0	5.06592	-0.624599			0	5.06592	0.0653038
		0	5.07616	-0.597775			0	5.07616	-0.0150566
		0	5.0864	-0.581158			0	5.0864	0.00921249
		0	5.09664	-0.474895			0	5.09664	0.0453568
		0	5.10688	-0.419079			0	5.10688	0.106392
		0	5.11712	-0.544476			0	5.11712	0.0694847
		0	5.12736	-0.556301			0	5.12736	0.068531
		0	5.1376	-0.554394			0	5.1376	0.048542
		0	5.14784	-0.465549			0	5.14784	0.113831
		0	5.15808	-0.407162			0	5.15808	0.0704308
		0	5.16832	-0.281643			0	5.16832	0.0970726
		0	5.17856	-0.297108			0	5.17856	0.110638
		0	5.1888	-0.355076			0	5.1888	0.162945
		0	5.19904	-0.310612			0	5.19904	0.0803566
		0	5.20928	-0.236618			0	5.20928	0.122761
		0	5.21952	-0.181293			0	5.21952	0.191319
		0	5.22976	-0.214027			0	5.22976	0.240719
		0	5.24	-0.123451			0	5.24	0.230053
		0	5.25024	-0.102066			0	5.25024	0.213028
		0	5.26048	-0.178001			0	5.26048	0.165066
		0	5.27072	-0.130699			0	5.27072	0.135384
		0	5.28096	-0.081131			0	5.28096	0.190006
		0	5.2912	-0.0687714			0	5.2912	0.140057
		0	5.30144	-0.0166779			0	5.30144	0.107418
		0	5.31168	-0.039566			0	5.31168	0.123295
		0	5.32192	-0.0973701			0	5.32192	0.0286102
		0	5.33216	-0.0420685			0	5.33216	0.026783
		0	5.3424	-0.0278206			0	5.3424	0.120472
		0	5.35264	-0.00182343			0	5.35264	0.0992088
		0	5.36288	0.0838623			0	5.36288	-0.0789375
		0	5.37312	0.0526314			0	5.37312	-0.153866
		0	5.38336	0.052845			0	5.38336	-0.0653725
		0	5.3936	-0.0190697			0	5.3936	-0.0421524
		0	5.40384	-0.115845			0	5.40384	-0.0227432
		0	5.41408	-0.13789			0	5.41408	0.0690346
		0	5.42432	-0.0670433			0	5.42432	0.166737
		0	5.43456	0.0121002			0	5.43456	0.0761528
		0	5.4448	0.164616			0	5.4448	-0.000904083
		0	5.45504	0.234188			0	5.45504	0.107109
		0	5.46528	0.0701942			0	5.46528	0.189198
		0	5.47552	0.0173454			0	5.47552	0.157238
		0	5.48576	0.109985			0	5.48576	0.0381241
		0	5.496	0.19865			0	5.496	0.0391502
		0	5.50624	0.230537			0	5.50624	0.021389
		0	5.51648	0.235092			0	5.51648	0.131069
		0	5.52672	0.313889			0	5.52672	0.142025
		0	5.53696	0.304939			0	5.53696	0.113235
		0	5.5472	0.332699			0	5.5472	0.0723953
		0	5.55744	0.316917			0	5.55744	0.204098
		0	5.56768	0.226833			0	5.56768	0.191078
		0	5.57792	0.20982			0	5.57792	0.16824
		0	5.58816	0.191746			0	5.58816	0.26815
		0	5.5984	0.316727			0	5.5984	0.143681
		0	5.60864	0.370384			0	5.60864	0.110363
		0	5.61888	0.325539			0	5.61888	0.0515785
		0	5.62912	0.277985			0	5.62912	0.132252
		0	5.63936	0.35516			0	5.63936	0.148441
		0	5.6496	0.357758			0	5.6496	0.210438
		0	5.65984	0.419128			0	5.65984	0.212227
		0	5.67008	0.435951			0	5.67008	0.144657
		0	5.68032	0.492416			0	5.68032	0.148544
		0	5.69056	0.446758			0	5.69056	0.134422
		0	5.7008	0.421192			0	5.7008	0.229027
		0	5.71104	0.396229			0	5.71104	0.182663
		0	5.72128	0.317394			0	5.72128	0.179588
		0	5.73152	0.425014			0	5.73152	0.215866
		0	5.74176	0.450191			0	5.74176	0.204517
		0	5.752	0.455441			0	5.752	0.25425
		0	5.76224	0.428616			0	5.76224	0.21949
		0	5.77248	0.464428			0	5.77248	0.295734
		0	5.78272	0.547577			0	5.78272	0.246456
		0	5.79296	0.524834			0	5.79296	0.209747
		0	5.8032	0.492916			0	5.8032	0.263432
		0	5.81344	0.444542			0	5.81344	0.236591
		0	5.82368	0.461128			0	5.82368	0.129066
		0	5.83392	0.490643			0	5.83392	0.191055
		0	5.84416	0.44978			0	5.84416	0.223114
		0	5.8544	0.406696			0	5.8544	0.166283
		0	5.86464	0.48354			0	5.86464	0.076664
		0	5.87488	0.547325			0	5.87488	0.0218506
		0	5.88512	0.622704			0	5.88512	0.0469208
		0	5.89536	0.604702			0	5.89536	0.076973
		0	5.9056	0.564198			0	5.9056	0.118256
		0	5.91584	0.550186			0	5.91584	-0.0087738
		0	5.92608	0.531303			0	5.92608	0.00949097
		0	5.93632	0.522186			0	5.93632	0.0944023
		0	5.94656	0.419022			0	5.94656	0.0641823
		0	5.9568	0.48455			0	5.9568	0.0119438
		0	5.96704	0.436104			0	5.96704	0.0666161
		0	5.97728	0.435696			0	5.97728	0.133121
		0	5.98752	0.466454			0	5.98752	0.158428
		0	5.99776	0.497677			0	5.99776	0.138187
		0	6.008	0.539219			0	6.008	0.133167
		0	6.01824	0.600674			0	6.01824	0.0285721
		0	6.02848	0.593365			0	6.02848	0.0101089
		0	6.03872	0.53371			0	6.03872	-0.11871
		0	6.04896	0.520931			0	6.04896	-0.111691
		0	6.0592	0.562122			0	6.0592	-0.0369453
		0	6.06944	0.571278			0	6.06944	-0.0492096
		0	6.07968	0.523853			0	6.07968	-0.00793839
		0	6.08992	0.499966			0	6.08992	0.0126457
		0	6.10016	0.540791			0	6.10016	0.0259514
		0	6.1104	0.658752			0	6.1104	0.0747223
		0	6.12064	0.745358			0	6.12064	0.0911713
		0	6.13088	0.783352			0	6.13088	0.0624771
		0	6.14112	0.739513			0	6.14112	0.0401039
		0	6.15136	0.747406			0	6.15136	0.0087738
		0	6.1616	0.690174			0	6.1616	-0.094223
		0	6.17184	0.683548			0	6.17184	-0.118969
		0	6.18208	0.558529			0	6.18208	-0.0556221
		0	6.19232	0.549591			0	6.19232	-0.0824356
		0	6.20256	0.538113			0	6.20256	-0.0934486
		0	6.2128	0.5312			0	6.2128	-0.0989647
		0	6.22304	0.481068			0	6.22304	-0.0453835
		0	6.23328	0.504044			0	6.23328	0.00123978
		0	6.24352	0.617706			0	6.24352	0.0229225
		0	6.25376	0.639236			0	6.25376	0.0892181
		0	6.264	0.63031			0	6.264	0.115284
		0	6.27424	0.811733			0	6.27424	0.0980721
		0	6.28448	0.751625			0	6.28448	0.0463486
		0	6.29472	0.695042			0	6.29472	0.0375748
		0	6.30496	0.782944			0	6.30496	0.0334587
		0	6.3152	0.922707			0	6.3152	0.0197029
		0	6.32544	0.867641			0	6.32544	-0.00394821
		0	6.33568	0.863579			0	6.33568	0.0578499
		0	6.34592	0.71056			0	6.34592	0.0388718
		0	6.35616	0.585892			0	6.35616	-0.0421028
		0	6.3664	0.610435			0	6.3664	-0.028347
		0	6.37664	0.594189			0	6.37664	-0.0343552
		0	6.38688	0.487911			0	6.38688	0.0143166
		0	6.39712	0.351429			0	6.39712	-0.112724
		0	6.40736	0.378132			0	6.40736	-0.188267
		0	6.4176	0.523281			0	6.4176	-0.205753
		0	6.42784	0.561619			0	6.42784	-0.177372
		0	6.43808	0.59248			0	6.43808	-0.0990372
		0	6.44832	0.640835			0	6.44832	-0.123085
		0	6.45856	0.608898			0	6.45856	-0.11301
		0	6.4688	0.627163			0	6.4688	-0.127483
		0	6.47904	0.587643			0	6.47904	-0.097084
		0	6.48928	0.501205			0	6.48928	0.00905991
		0	6.49952	0.387012			0	6.49952	-0.0320168
		0	6.50976	0.541832			0	6.50976	0.0416527
		0	6.52	0.666309			0	6.52	0.104534
		0	6.53024	0.67947			0	6.53024	0.0321884
		0	6.54048	0.667789			0	6.54048	-0.0102501
		0	6.55072	0.623905			0	6.55072	-0.0182381
		0	6.56096	0.640118			0	6.56096	-0.110268
		0	6.5712	0.598324			0	6.5712	-0.167885
		0	6.58144	0.595024			0	6.58144	-0.106441
		0	6.59168	0.582481			0	6.59168	-0.107384
		0	6.60192	0.558449			0	6.60192	-0.236595
		0	6.61216	0.513626			0	6.61216	-0.212715
		0	6.6224	0.423489			0	6.6224	-0.178574
		0	6.63264	0.473118			0	6.63264	-0.1245
		0	6.64288	0.557293			0	6.64288	-0.0643883
		0	6.65312	0.619946			0	6.65312	-0.0249367
		0	6.66336	0.702297			0	6.66336	0.0150681
		0	6.6736	0.726593			0	6.6736	-0.0358086
		0	6.68384	0.674904			0	6.68384	-0.02388
		0	6.69408	0.684605			0	6.69408	-0.0212555
		0	6.70432	0.606667			0	6.70432	0.0387917
		0	6.71456	0.551346			0	6.71456	0.0207291
		0	6.7248	0.624405			0	6.7248	-0.0448608
		0	6.73504	0.580631			0	6.73504	0.0145531
		0	6.74528	0.458408			0	6.74528	0.0113258
		0	6.75552	0.510193			0	6.75552	0.037384
		0	6.76576	0.597275			0	6.76576	0.0871201
		0	6.776	0.605896			0	6.776	0.0321503
		0	6.78624	0.62883			0	6.78624	-0.014328
		0	6.79648	0.542271			0	6.79648	0.0431404
		0	6.80672	0.503384			0	6.80672	0.109634
		0	6.81696	0.621925			0	6.81696	0.121269
		0	6.8272	0.64378			0	6.8272	0.116112
		0	6.83744	0.487423			0	6.83744	-0.0665779
		0	6.84768	0.427391			0	6.84768	-0.153111
		0	6.85792	0.451424			0	6.85792	-0.0859032
		0	6.86816	0.382618			0	6.86816	-0.0307693
		0	6.8784	0.337444			0	6.8784	-0.0173454
		0	6.88864	0.260094			0	6.88864	0.0064621
		0	6.89888	0.214993			0	6.89888	0.093605
		0	6.90912	0.29726			0	6.90912	0.10141
		0	6.91936	0.400341			0	6.91936	0.150787
		0	6.9296	0.314224			0	6.9296	0.118053
		0	6.93984	0.33157			0	6.93984	0.120342
		0	6.95008	0.401199			0	6.95008	0.0930786
		0	6.96032	0.409103			0	6.96032	0.0934601
		0	6.97056	0.464943			0	6.97056	-0.0010376
		0	6.9808	0.484837			0	6.9808	0.0499725
		0	6.99104	0.495125			0	6.99104	0.0826378
		0	7.00128	0.416519			0	7.00128	0.0143623
		0	7.01152	0.393234			0	7.01152	0.103771
		0	7.02176	0.489212			0	7.02176	0.0589371
		0	7.032	0.521313			0	7.032	0.0300903
		0	7.04224	0.428856			0	7.04224	-0.0108452
		0	7.05248	0.327408			0	7.05248	-0.0202408
		0	7.06272	0.287201			0	7.06272	-0.00712967
		0	7.07296	0.34211			0	7.07296	0.0355568
		0	7.0832	0.30378			0	7.0832	0.110081
		0	7.09344	0.361038			0	7.09344	0.194695
		0	7.10368	0.391064			0	7.10368	0.00836945
		0	7.11392	0.417686			0	7.11392	0.017643
		0	7.12416	0.444233			0	7.12416	0.0243034
		0	7.1344	0.3904			0	7.1344	0.0298119
		0	7.14464	0.329567			0	7.14464	-0.00609207
		0	7.15488	0.37154			0	7.15488	-0.000991821
		0	7.16512	0.344646			0	7.16512	0.0482674
		0	7.17536	0.285374			0	7.17536	-0.0321846
		0	7.1856	0.252808			0	7.1856	-0.0290871
		0	7.19584	0.312672			0	7.19584	-0.126064
		0	7.20608	0.444447			0	7.20608	-0.165096
		0	7.21632	0.449551			0	7.21632	-0.248375
		0	7.22656	0.418594			0	7.22656	-0.37104
		0	7.2368	0.437725			0	7.2368	-0.391815
		0	7.24704	0.385509			0	7.24704	-0.454823
		0	7.25728	0.395489			0	7.25728	-0.382015
		0	7.26752	0.348602			0	7.26752	-0.246189
		0	7.27776	0.368023			0	7.27776	-0.2859
		0	7.288	0.316669			0	7.288	-0.357578
		0	7.29824	0.294197			0	7.29824	-0.470341
		0	7.30848	0.317719			0	7.30848	-0.539207
		0	7.31872	0.357201			0	7.31872	-0.46946
		0	7.32896	0.252281			0	7.32896	-0.339771
		0	7.3392	0.196232			0	7.3392	-0.249836
		0	7.34944	0.290668			0	7.34944	-0.225269
		0	7.35968	0.354038			0	7.35968	-0.118698
		0	7.36992	0.335632			0	7.36992	-0.129555
		0	7.38016	0.168217			0	7.38016	-0.240017
		0	7.3904	0.0872002			0	7.3904	-0.230717
		0	7.40064	0.215588			0	7.40064	-0.273193
		0	7.41088	0.261391			0	7.41088	-0.275532
		0	7.42112	0.252392			0	7.42112	-0.381397
		0	7.43136	0.228836			0	7.43136	-0.368847
		0	7.4416	0.235012			0	7.4416	-0.29842
		0	7.45184	0.286282			0	7.45184	-0.164497
		0	7.46208	0.304558			0	7.46208	-0.148796
		0	7.47232	0.310875			0	7.47232	-0.173687
		0	7.48256	0.303207			0	7.48256	-0.142708
		0	7.4928	0.436142			0	7.4928	-0.103703
		0	7.50304	0.424126			0	7.50304	-0.00607681
		0	7.51328	0.389839			0	7.51328	-0.0128975
		0	7.52352	0.407185			0	7.52352	0.00255966
		0	7.53376	0.381577			0	7.53376	-0.00902557
		0	7.544	0.306522			0	7.544	0.07304
		0	7.55424	0.359737			0	7.55424	0.065815
		0	7.56448	0.236584			0	7.56448	0.093853
		0	7.57472	0.279331			0	7.57472	0.0020256
		0	7.58496	0.284412			0	7.58496	0.0284462
		0	7.5952	0.246075			0	7.5952	0.0247002
		0	7.60544	0.171474			0	7.60544	0.0486259
		0	7.61568	0.125179			0	7.61568	0.0258789
		0	7.62592	0.0547752			0	7.62592	0.0204201
		0	7.63616	0.086216			0	7.63616	-0.0694275
		0	7.6464	0.132442			0	7.6464	-0.0896111
		0	7.65664	0.0377312			0	7.65664	0.027977
		0	7.66688	-0.00212097			0	7.66688	0.0288963
		0	7.67712	-0.0375633			0	7.67712	0.00786972
		0	7.68736	0.0720634			0	7.68736	-0.0908623
		0	7.6976	0.232372			0	7.6976	-0.137486
		0	7.70784	0.279102			0	7.70784	-0.116299
		0	7.71808	0.215462			0	7.71808	-0.0368004
		0	7.72832	0.192524			0	7.72832	-0.113914
		0	7.73856	0.239994			0	7.73856	-0.162163
		0	7.7488	0.18256			0	7.7488	-0.0669708
		0	7.75904	0.0660439			0	7.75904	-0.0691299
		0	7.76928	-0.0232658			0	7.76928	-0.0772705
		0	7.77952	-0.0625496			0	7.77952	-0.0941162
		0	7.78976	-0.131287			0	7.78976	-0.00199127
		0	7.8	-0.197445			0	7.8	0.0496635
		0	7.81024	-0.096035			0	7.81024	0.0360107
		0	7.82048	-0.0614624			0	7.82048	0.016964
		0	7.83072	-0.0771027			0	7.83072	0.0249748
		0	7.84096	-0.132549			0	7.84096	0.0636597
		0	7.8512	-0.118874			0	7.8512	0.160336
		0	7.86144	-0.112568			0	7.86144	0.100471
		0	7.87168	-0.128017			0	7.87168	-0.031662
		0	7.88192	-0.110592			0	7.88192	-0.071373
		0	7.89216	-0.0101204			0	7.89216	-0.0455284
		0	7.9024	-0.0434303			0	7.9024	0.0148392
		0	7.91264	-0.0851631			0	7.91264	-0.0202179
		0	7.92288	0.00156021			0	7.92288	-0.0273476
		0	7.93312	0.0107155			0	7.93312	0.0678406
		0	7.94336	0.0771141			0	7.94336	0.142193
		0	7.9536	0.0837364			0	7.9536	0.10651
		0	7.96384	0.132931			0	7.96384	0.101807
		0	7.97408	0.190056			0	7.97408	0.054657
		0	7.98432	0.27459			0	7.98432	-0.0661278
		0	7.99456	0.30537			0	7.99456	-0.0603104
		0	8.0048	0.205257			0	8.0048	-0.150883
		0	8.01504	0.28894			0	8.01504	-0.134769
		0	8.02528	0.426533			0	8.02528	-0.159061
		0	8.03552	0.39333			0	8.03552	-0.13485
		0	8.04576	0.293163			0	8.04576	-0.00889206
		0	8.056	0.260902			0	8.056	0.0564117
		0	8.06624	0.276592			0	8.06624	-0.0383034
		0	8.07648	0.31078			0	8.07648	-0.0991554
		0	8.08672	0.378811			0	8.08672	-0.143112
		0	8.09696	0.421322			0	8.09696	-0.109112
		0	8.1072	0.368465			0	8.1072	-0.0398064
		0	8.11744	0.363289			0	8.11744	-0.100746
		0	8.12768	0.305927			0	8.12768	-0.0105019
		0	8.13792	0.181892			0	8.13792	0.0678787
		0	8.14816	0.214436			0	8.14816	0.0806084
		0	8.1584	0.156605			0	8.1584	-0.105976
		0	8.16864	0.163437			0	8.16864	-0.0989342
		0	8.17888	0.188854			0	8.17888	-0.0661278
		0	8.18912	0.217213			0	8.18912	-0.183907
		0	8.19936	0.324013			0	8.19936	-0.199554
		0	8.2096	0.311256			0	8.2096	-0.108875
		0	8.21984	0.173904			0	8.21984	-0.075161
		0	8.23008	0.221088			0	8.23008	-0.176777
		0	8.24032	0.265362			0	8.24032	-0.253368
		0	8.25056	0.286304			0	8.25056	-0.277733
		0	8.2608	0.297119			0	8.2608	-0.273861
		0	8.27104	0.250294			0	8.27104	-0.170555
		0	8.28128	0.177006			0	8.28128	-0.181652
		0	8.29152	0.110485			0	8.29152	-0.149155
		0	8.30176	0.178158			0	8.30176	-0.161922
		0	8.312	0.215687			0	8.312	-0.164364
		0	8.32224	0.19556			0	8.32224	-0.116562
		0	8.33248	0.14465			0	8.33248	-0.121155
		0	8.34272	0.208668			0	8.34272	-0.181473
		0	8.35296	0.277195			0	8.35296	-0.274944
		0	8.3632	0.223804			0	8.3632	-0.273552
		0	8.37344	0.233772			0	8.37344	-0.225178
		0	8.38368	0.164951			0	8.38368	-0.216022
		0	8.39392	0.207569			0	8.39392	-0.207462
		0	8.40416	0.301563			0	8.40416	-0.184868
		0	8.4144	0.21558			0	8.4144	-0.179592
		0	8.42464	0.18977			0	8.42464	-0.190033
		0	8.43488	0.249603			0	8.43488	-0.162018
		0	8.44512	0.259388			0	8.44512	-0.136589
		0	8.45536	0.22588			0	8.45536	-0.126694
		0	8.4656	0.129974			0	8.4656	-0.147522
		0	8.47584	0.0892677			0	8.47584	-0.182079
		0	8.48608	0.117908			0	8.48608	-0.20623
		0	8.49632	0.113728			0	8.49632	-0.229801
		0	8.50656	0.0857353			0	8.50656	-0.252724
		0	8.5168	0.124241			0	8.5168	-0.196812
		0	8.52704	0.19051			0	8.52704	-0.1544
		0	8.53728	0.109699			0	8.53728	-0.192181
		0	8.54752	0.0917091			0	8.54752	-0.155685
		0	8.55776	0.0604973			0	8.55776	-0.188457
		0	8.568	0.167286			0	8.568	-0.268044
		0	8.57824	0.168659			0	8.57824	-0.326584
		0	8.58848	0.161816			0	8.58848	-0.458309
		0	8.59872	0.0468521			0	8.59872	-0.463833
		0	8.60896	0.0593224			0	8.60896	-0.493122
		0	8.6192	0.0845222			0	8.6192	-0.409809
		0	8.62944	0.111614			0	8.62944	-0.363182
		0	8.63968	0.100193			0	8.63968	-0.300446
		0	8.64992	0.00615311			0	8.64992	-0.238155
		0	8.66016	0.0268097			0	8.66016	-0.209045
		0	8.6704	-0.0203362			0	8.6704	-0.208401
		0	8.68064	0.00606918			0	8.68064	-0.163364
		0	8.69088	0.0664024			0	8.69088	-0.178909
		0	8.70112	0.165035			0	8.70112	-0.198719
		0	8.71136	0.144009			0	8.71136	-0.255383
		0	8.7216	0.0050087			0	8.7216	-0.333355
		0	8.73184	0.0782127			0	8.73184	-0.386951
		0	8.74208	0.129688			0	8.74208	-0.359428
		0	8.75232	0.115063			0	8.75232	-0.247494
		0	8.76256	0.110088			0	8.76256	-0.219837
		0	8.7728	0.0671501			0	8.7728	-0.256268
		0	8.78304	0.0635185			0	8.78304	-0.252888
		0	8.79328	-0.0796547			0	8.79328	-0.320911
		0	8.80352	-0.0525703			0	8.80352	-0.249493
		0	8.81376	-0.0109787			0	8.81376	-0.269093
		0	8.824	0.041687			0	8.824	-0.273552
		0	8.83424	0.0298042			0	8.83424	-0.353264
		0	8.84448	-0.0770798			0	8.84448	-0.295448
		0	8.85472	-0.147713			0	8.85472	-0.213074
		0	8.86496	0.0439186			0	8.86496	-0.167072
		0	8.8752	0.0511742			0	8.8752	-0.0683784
		0	8.88544	0.021389			0	8.88544	-0.0100594
		0	8.89568	-0.0211601			0	8.89568	-0.0209808
		0	8.90592	0.0559807			0	8.90592	-0.00564957
		0	8.91616	0.0662689			0	8.91616	-0.025177
		0	8.9264	0.1493			0	8.9264	-0.108421
		0	8.93664	0.186478			0	8.93664	-0.140953
		0	8.94688	0.18996			0	8.94688	-0.219143
		0	8.95712	0.242451			0	8.95712	-0.238823
		0	8.96736	0.219261			0	8.96736	-0.28653
		0	8.9776	0.211552			0	8.9776	-0.263451
		0	8.98784	0.0870323			0	8.98784	-0.364819
		0	8.99808	0.110733			0	8.99808	-0.252079
		0	9.00832	0.0464058			0	9.00832	-0.122463
		0	9.01856	-0.00816727			0	9.01856	-0.0269661
		0	9.0288	-0.0458946			0	9.0288	-0.163269
		0	9.03904	-0.109646			0	9.03904	-0.235794
		0	9.04928	-0.0750427			0	9.04928	-0.379799
		0	9.05952	-0.0867729			0	9.05952	-0.293484
		0	9.06976	-0.0838394			0	9.06976	-0.267338
		0	9.08	-0.0551834			0	9.08	-0.302567
		0	9.09024	0.0239639			0	9.09024	-0.276936
		0	9.10048	0.131443			0	9.10048	-0.177979
		0	9.11072	0.192295			0	9.11072	-0.150917
		0	9.12096	0.156105			0	9.12096	-0.181126
		0	9.1312	0.1171			0	9.1312	-0.151634
		0	9.14144	0.179268			0	9.14144	-0.20496
		0	9.15168	0.163509			0	9.15168	-0.244656
		0	9.16192	0.131474			0	9.16192	-0.279392
		0	9.17216	0.037468			0	9.17216	-0.29427
		0	9.1824	0.0417976			0	9.1824	-0.177456
		0	9.19264	0.0170975			0	9.19264	-0.195564
		0	9.20288	0.106884			0	9.20288	-0.16283
		0	9.21312	0.108768			0	9.21312	-0.0929604
		0	9.22336	0.164249			0	9.22336	-0.127804
		0	9.2336	0.142529			0	9.2336	-0.145195
		0	9.24384	0.219093			0	9.24384	-0.265232
		0	9.25408	0.26083			0	9.25408	-0.247356
		0	9.26432	0.18729			0	9.26432	-0.241222
		0	9.27456	0.125706			0	9.27456	-0.112057
		0	9.2848	0.0519371			0	9.2848	-0.172985
		0	9.29504	0.0180244			0	9.29504	-0.242104
		0	9.30528	0.0782852			0	9.30528	-0.175323
		0	9.31552	0.0802383			0	9.31552	-0.109997
		0	9.32576	0.012661			0	9.32576	-0.00466156
		0	9.336	-0.0360146			0	9.336	0.00594711
		0	9.34624	0.00332642			0	9.34624	0.0124779
		0	9.35648	0.111927			0	9.35648	-0.103416
		0	9.36672	0.251057			0	9.36672	-0.106571
		0	9.37696	0.138889			0	9.37696	-0.211666
		0	9.3872	0.160721			0	9.3872	-0.239754
		0	9.39744	0.157486			0	9.39744	-0.192226
		0	9.40768	0.177731			0	9.40768	-0.0593414
		0	9.41792	0.168278			0	9.41792	-0.0616684
		0	9.42816	0.246765			0	9.42816	-0.0969658
		0	9.4384	0.164272			0	9.4384	-0.0774384
		0	9.44864	0.101959			0	9.44864	-0.0735893
		0	9.45888	0.206734			0	9.45888	-0.0238876
		0	9.46912	0.275196			0	9.46912	-0.0190239
		0	9.47936	0.252918			0	9.47936	-0.0291824
		0	9.4896	0.233089			0	9.4896	0.0174294
		0	9.49984	0.163971			0	9.49984	0.0254631
		0	9.51008	0.201141			0	9.51008	0.0400314
		0	9.52032	0.227676			0	9.52032	0.0707741
		0	9.53056	0.249374			0	9.53056	0.15472
		0	9.5408	0.155975			0	9.5408	0.128994
		0	9.55104	0.0856743			0	9.55104	0.123104
		0	9.56128	0.0765419			0	9.56128	0.0739212
		0	9.57152	0.10915			0	9.57152	0.0488396
		0	9.58176	0.165371			0	9.58176	0.012661
		0	9.592	0.144253			0	9.592	0.0519142
		0	9.60224	0.180828			0	9.60224	0.0929146
		0	9.61248	0.0898628			0	9.61248	0.0911598
		0	9.62272	0.0650177			0	9.62272	0.200321
		0	9.63296	0.0856972			0	9.63296	0.156914
		0	9.6432	0.121845			0	9.6432	0.141312
		0	9.65344	0.140011			0	9.65344	0.0752678
		0	9.66368	0.117374			0	9.66368	0.0422249
		0	9.67392	0.104893			0	9.67392	0.0794182
		0	9.68416	0.0729561			0	9.68416	0.20602
		0	9.6944	0.145126			0	9.6944	0.207981
		0	9.70464	0.0926628			0	9.70464	0.220657
		0	9.71488	0.0459938			0	9.71488	0.243069
		0	9.72512	0.00567627			0	9.72512	0.228535
		0	9.73536	0.0402718			0	9.73536	0.311256
		0	9.7456	0.0820427			0	9.7456	0.302673
		0	9.75584	0.106205			0	9.75584	0.367737
		0	9.76608	0.0929604			0	9.76608	0.351452
		0	9.77632	0.11554			0	9.77632	0.319458
		0	9.78656	0.0499382			0	9.78656	0.373638
		0	9.7968	0.0536804			0	9.7968	0.383617
		0	9.80704	0.0218506			0	9.80704	0.368809
		0	9.81728	0.0360031			0	9.81728	0.339653
		0	9.82752	-0.0593414			0	9.82752	0.295856
		0	9.83776	-0.00533676			0	9.83776	0.238491
		0	9.848	0.0397301			0	9.848	0.300896
		0	9.85824	0.0747452			0	9.85824	0.447426
		0	9.86848	0.124073			0	9.86848	0.456024
		0	9.87872	0.138058			0	9.87872	0.364353
		0	9.88896	0.172665			0	9.88896	0.344692
		0	9.8992	0.127018			0	9.8992	0.440647
		0	9.90944	0.101078			0	9.90944	0.385414
		0	9.91968	0.100742			0	9.91968	0.361404
		0	9.92992	0.104073			0	9.92992	0.211273
		0	9.94016	0.117123			0	9.94016	0.193905
		0	9.9504	0.0629692			0	9.9504	0.174236
		0	9.96064	0.00439835			0	9.96064	0.204136
		0	9.97088	-0.0436745			0	9.97088	0.231457
		0	9.98112	-0.0975494			0	9.98112	0.194298
		0	9.99136	-0.033947			0	9.99136	0.252186
		0	10.0016	0.0250587			0	10.0016	0.245049
		0	10.0118	0.133064			0	10.0118	0.220943
		0	10.0221	0.140503			0	10.0221	0.257717
		0	10.0323	0.0811691			0	10.0323	0.207127
		0	10.0426	0.0241623			0	10.0426	0.199486
		0	10.0528	0.0527992			0	10.0528	0.237965
		0	10.063	0.0338898			0	10.063	0.263393
		0	10.0733	-0.0231018			0	10.0733	0.255039
		0	10.0835	0.0877953			0	10.0835	0.25568
		0	10.0938	0.107323			0	10.0938	0.272831
		0	10.104	0.11705			0	10.104	0.364304
		0	10.1142	0.114307			0	10.1142	0.357056
		0	10.1245	0.107609			0	10.1245	0.382412
		0	10.1347	0.150803			0	10.1347	0.405598
		0	10.145	0.223789			0	10.145	0.44582
		0	10.1552	0.204361			0	10.1552	0.512386
		0	10.1654	0.0536003			0	10.1654	0.423504
		0	10.1757	0.0220566			0	10.1757	0.311314
		0	10.1859	0.0975952			0	10.1859	0.261387
		0	10.1962	0.0799751			0	10.1962	0.257946
		0	10.2064	0.240662			0	10.2064	0.237682
		0	10.2166	0.385273			0	10.2166	0.240208
		0	10.2269	0.32201			0	10.2269	0.326359
		0	10.2371	0.156166			0	10.2371	0.197731
		0	10.2474	0.079586			0	10.2474	0.193748
		0	10.2576	0.321972			0	10.2576	0.214314
		0	10.2678	0.348366			0	10.2678	0.365879
		0	10.2781	0.205456			0	10.2781	0.343834
		0	10.2883	0.164345			0	10.2883	0.322392
		0	10.2986	0.119854			0	10.2986	0.398266
		0	10.3088	0.0725136			0	10.3088	0.404263
		0	10.319	0.0983238			0	10.319	0.415302
		0	10.3293	0.162819			0	10.3293	0.374081
		0	10.3395	0.171947			0	10.3395	0.376472
		0	10.3498	0.170002			0	10.3498	0.385582
		0	10.36	0.14093			0	10.36	0.346302
		0	10.3702	0.142155			0	10.3702	0.300053
		0	10.3805	0.176895			0	10.3805	0.256428
		0	10.3907	0.162113			0	10.3907	0.120747
		0	10.401	0.229942			0	10.401	0.136257
		0	10.4112	0.189556			0	10.4112	0.117741
		0	10.4214	0.231491			0	10.4214	0.150276
		0	10.4317	0.220371			0	10.4317	0.184093
		0	10.4419	0.29557			0	10.4419	0.245953
		0	10.4522	0.285206			0	10.4522	0.309231
		0	10.4624	0.185524			0	10.4624	0.256706
		0	10.4726	0.200237			0	10.4726	0.308525
		0	10.4829	0.242046			0	10.4829	0.269997
		0	10.4931	0.181736			0	10.4931	0.215889
		0	10.5034	0.115158			0	10.5034	0.169933
		0	10.5136	0.124226			0	10.5136	0.0965385
		0	10.5238	0.203644			0	10.5238	0.0570641
		0	10.5341	0.20459			0	10.5341	0.00315857
		0	10.5443	0.124371			0	10.5443	0.051403
		0	10.5546	0.140335			0	10.5546	0.0633812
		0	10.5648	0.1395			0	10.5648	-0.0157242
		0	10.575	0.0433464			0	10.575	-0.0365868
		0	10.5853	0.107014			0	10.5853	-0.0346069
		0	10.5955	0.108936			0	10.5955	-0.0791664
		0	10.6058	0.0840187			0	10.6058	-0.155891
		0	10.616	0.101505			0	10.616	-0.0908508
		0	10.6262	0.128033			0	10.6262	-0.0352135
		0	10.6365	0.120079			0	10.6365	-0.152851
		0	10.6467	0.1632			0	10.6467	-0.209332
		0	10.657	0.169327			0	10.657	-0.205349
		0	10.6672	0.217464			0	10.6672	-0.0543251
		0	10.6774	0.299004			0	10.6774	-0.106087
		0	10.6877	0.345112			0	10.6877	-0.1619
		0	10.6979	-0.117588			0	10.6979	-0.225868
		0	10.7082	-0.415585			0	10.7082	-0.199356
		0	10.7184	-0.295303			0	10.7184	-0.105488
		0	10.7286	-0.143208			0	10.7286	0.0188446
		0	10.7389	0.0625267			0	10.7389	0.0431061
		0	10.7491	0.155617			0	10.7491	-0.0203743
		0	10.7594	0.171005			0	10.7594	-0.00988388
		0	10.7696	0.103367			0	10.7696	0.0666733
		0	10.7798	0.0670052			0	10.7798	0.0692253
		0	10.7901	0.10014			0	10.7901	0.025177
		0	10.8003	0.130249			0	10.8003	0.0341682
		0	10.8106	0.211384			0	10.8106	-0.0391121
		0	10.8208	0.178982			0	10.8208	0.0311852
		0	10.831	0.19796			0	10.831	0.057148
		0	10.8413	0.0877647			0	10.8413	0.0646858
		0	10.8515	0.0925636			0	10.8515	0.110722
		0	10.8618	0.145748			0	10.8618	0.188267
		0	10.872	0.229393			0	10.872	0.160744
		0	10.8822	0.163136			0	10.8822	0.107861
		0	10.8925	0.217022			0	10.8925	0.0221138
		0	10.9027	0.403057			0	10.9027	0.0629044
		0	10.913	0.469185			0	10.913	0.0308533
		0	10.9232	0.513233			0	10.9232	-0.0879669
		0	10.9334	0.514805			0	10.9334	-0.0424271
		0	10.9437	0.352989			0	10.9437	0.0278816
		0	10.9539	0.288761			0	10.9539	-0.31842
		0	10.9642	0.203564			0	10.9642	-0.341358
		0	10.9744	0.237881			0	10.9744	-0.18158
		0	10.9846	0.295006			0	10.9846	-0.0472221
		0	10.9949	0.246632			0	10.9949	0.00317001
		0	11.0051	0.206482			0	11.0051	0.0208855
		0	11.0154	0.137856			0	11.0154	0.0473518
		0	11.0256	0.119556			0	11.0256	0.0713463
		0	11.0358	0.151218			0	11.0358	0.20443
		0	11.0461	0.127914			0	11.0461	0.250793
		0	11.0563	0.0580788			0	11.0563	0.255596
		0	11.0666	-0.00216675			0	11.0666	0.211716
		0	11.0768	-0.0241661			0	11.0768	0.168324
		0	11.087	0.102032			0	11.087	0.0731087
		0	11.0973	0.0276451			0	11.0973	0.0868111
		0	11.1075	0.0463753			0	11.1075	0.0769463
		0	11.1178	-0.0418892			0	11.1178	0.0217323
		0	11.128	-0.0580902			0	11.128	0.00331497
		0	11.1382	-0.101959			0	11.1382	0.0357399
		0	11.1485	-0.249134			0	11.1485	-0.0985031
		0	11.1587	-0.334881			0	11.1587	-0.140583
		0	11.169	-0.338005			0	11.169	-0.0921478
		0	11.1792	-0.189922			0	11.1792	-0.0849724
		0	11.1894	-0.148689			0	11.1894	-0.0605011
		0	11.1997	-0.247326			0	11.1997	-0.0635376
		0	11.2099	-0.170563			0	11.2099	-0.0285759
		0	11.2202	-0.184868			0	11.2202	-0.101662
		0	11.2304	-0.159668			0	11.2304	-0.175236
		0	11.2406	-0.137295			0	11.2406	-0.261879
		0	11.2509	-0.1106			0	11.2509	-0.279736
		0	11.2611	-0.156055			0	11.2611	-0.188828
		0	11.2714	-0.137745			0	11.2714	-0.186409
		0	11.2816	-0.0882607			0	11.2816	-0.209965
		0	11.2918	-0.0144234			0	11.2918	-0.290943
		0	11.3021	-0.0831261			0	11.3021	-0.189293
		0	11.3123	-0.07967			0	11.3123	-0.215195
		0	11.3226	0.0141029			0	11.3226	-0.209034
		0	11.3328	-0.0301247			0	11.3328	-0.295925
		0	11.343	-0.0698204			0	11.343	-0.278988
		0	11.3533	-0.114597			0	11.3533	-0.36311
		0	11.3635	-0.117611			0	11.3635	-0.504276
		0	11.3738	-0.0516167			0	11.3738	-0.412907
		0	11.384	-0.0137291			0	11.384	-0.299335
		0	11.3942	0.0395775			0	11.3942	-0.319233
		0	11.4045	0.143005			0	11.4045	-0.346245
		0	11.4147	0.149944			0	11.4147	-0.425995
		0	11.425	0.159252			0	11.425	-0.401424
		0	11.4352	0.110447			0	11.4352	-0.29892
		0	11.4454	0.166729			0	11.4454	-0.309383
		0	11.4557	0.242973			0	11.4557	-0.303448
		0	11.4659	0.228191			0	11.4659	-0.431908
		0	11.4762	0.225594			0	11.4762	-0.447056
		0	11.4864	0.184261			0	11.4864	-0.464954
		0	11.4966	0.182499			0	11.4966	-0.450981
		0	11.5069	0.18214			0	11.5069	-0.509953
		0	11.5171	0.12299			0	11.5171	-0.650204
		0	11.5274	0.0754356			0	11.5274	-0.693703
		0	11.5376	0.139416			0	11.5376	-0.622047
		0	11.5478	0.117161			0	11.5478	-0.57547
		0	11.5581	0.0232582			0	11.5581	-0.501442
		0	11.5683	0.0389938			0	11.5683	-0.485912
		0	11.5786	0.0250435			0	11.5786	-0.564636
		0	11.5888	0.0296707			0	11.5888	-0.620617
		0	11.599	0.0146027			0	11.599	-0.606289
		0	11.6093	0.047123			0	11.6093	-0.603306
		0	11.6195	0.0921822			0	11.6195	-0.592937
		0	11.6298	0.149822			0	11.6298	-0.517273
		0	11.64	0.0793343			0	11.64	-0.628826
		0	11.6502	0.0379219			0	11.6502	-0.62289
		0	11.6605	-0.0171318			0	11.6605	-0.592388
		0	11.6707	-0.0467987			0	11.6707	-0.505112
		0	11.681	0.0778694			0	11.681	-0.479481
		0	11.6912	0.103317			0	11.6912	-0.456348
		0	11.7014	0.0811462			0	11.7014	-0.518955
		0	11.7117	0.0617638			0	11.7117	-0.546326
		0	11.7219	-0.00538635			0	11.7219	-0.588646
		0	11.7322	0.045826			0	11.7322	-0.485722
		0	11.7424	0.105824			0	11.7424	-0.349392
		0	11.7526	0.204517			0	11.7526	-0.384533
		0	11.7629	0.190723			0	11.7629	-0.511692
		0	11.7731	0.12281			0	11.7731	-0.517391
		0	11.7834	0.170399			0	11.7834	-0.490391
		0	11.7936	0.120579			0	11.7936	-0.613045
		0	11.8038	0.0682945			0	11.8038	-0.588631
		0	11.8141	0.0594025			0	11.8141	-0.533772
		0	11.8243	-0.0018959			0	11.8243	-0.563858
		0	11.8346	-0.0293465			0	11.8346	-0.587605
		0	11.8448	-0.00959778			0	11.8448	-0.559628
		0	11.855	0.0412827			0	11.855	-0.556946
		0	11.8653	-0.00256348			0	11.8653	-0.536598
		0	11.8755	-0.0146141			0	11.8755	-0.560474
		0	11.8858	-0.0197067			0	11.8858	-0.498547
		0	11.896	-0.056591			0	11.896	-0.559902
		0	11.9062	0.0481873			0	11.9062	-0.540962
		0	11.9165	0.111423			0	11.9165	-0.559845
		0	11.9267	0.0779037			0	11.9267	-0.553574
		0	11.937	-0.0264549			0	11.937	-0.445976
		0	11.9472	-0.0420685			0	11.9472	-0.424671
		0	11.9574	-0.0617714			0	11.9574	-0.385616
		0	11.9677	-0.0410194			0	11.9677	-0.439251
		0	11.9779	-0.000926971			0	11.9779	-0.406979
		0	11.9882	0.10648			0	11.9882	-0.387192
		0	11.9984	0.196529			0	11.9984	-0.418377
		0	3.00768	0.157436			0	3.00768	0.288776
		0	3.01792	0.167377			0	3.01792	0.246468
		0	3.02816	0.291584			0	3.02816	0.182346
		0	3.0384	0.47245			0	3.0384	0.283272
		0	3.04864	0.437737			0	3.04864	0.308922
		0	3.05888	0.357414			0	3.05888	0.301208
		0	3.06912	0.316723			0	3.06912	0.35923
		0	3.07936	0.389576			0	3.07936	0.271492
		0	3.0896	0.402641			0	3.0896	0.126495
		0	3.09984	0.374481			0	3.09984	0.233189
		0	3.11008	0.334248			0	3.11008	0.202553
		0	3.12032	0.377808			0	3.12032	0.17823
		0	3.13056	0.297626			0	3.13056	0.187092
		0	3.1408	0.274143			0	3.1408	0.230682
		0	3.15104	0.30056			0	3.15104	0.364197
		0	3.16128	0.293621			0	3.16128	0.308983
		0	3.17152	0.290276			0	3.17152	0.325089
		0	3.18176	0.17775			0	3.18176	0.277046
		0	3.192	0.160358			0	3.192	0.25671
		0	3.20224	0.208313			0	3.20224	0.237469
		0	3.21248	0.30838			0	3.21248	0.15736
		0	3.22272	0.272663			0	3.22272	0.130119
		0	3.23296	0.119003			0	3.23296	0.241127
		0	3.2432	0.0500679			0	3.2432	0.338665
		0	3.25344	0.0433922			0	3.25344	0.235943
		0	3.26368	0.122772			0	3.26368	0.224785
		0	3.27392	0.131378			0	3.27392	0.370136
		0	3.28416	0.179703			0	3.28416	0.471764
		0	3.2944	0.29343			0	3.2944	0.463478
		0	3.30464	0.308167			0	3.30464	0.470547
		0	3.31488	0.340446			0	3.31488	0.395947
		0	3.32512	0.346836			0	3.32512	0.349716
		0	3.33536	0.351334			0	3.33536	0.271564
		0	3.3456	0.365398			0	3.3456	0.24654
		0	3.35584	0.365971			0	3.35584	0.264771
		0	3.36608	0.363358			0	3.36608	0.222328
		0	3.37632	0.277519			0	3.37632	0.221195
		0	3.38656	0.289948			0	3.38656	0.271374
		0	3.3968	0.264999			0	3.3968	0.305801
		0	3.40704	0.313385			0	3.40704	0.323921
		0	3.41728	0.320934			0	3.41728	0.260597
		0	3.42752	0.399731			0	3.42752	0.241283
		0	3.43776	0.44416			0	3.43776	0.238503
		0	3.448	0.390266			0	3.448	0.146832
		0	3.45824	0.315174			0	3.45824	0.0376968
		0	3.46848	0.259693			0	3.46848	-0.0473938
		0	3.47872	0.250183			0	3.47872	0.0431595
		0	3.48896	0.273354			0	3.48896	0.049057
		0	3.4992	0.287949			0	3.4992	0.0594406
		0	3.50944	0.301193			0	3.50944	0.153236
		0	3.51968	0.365669			0	3.51968	0.203854
		0	3.52992	0.320633			0	3.52992	0.237564
		0	3.54016	0.296841			0	3.54016	0.145893
		0	3.5504	0.256096			0	3.5504	0.0814819
		0	3.56064	0.311993			0	3.56064	0.13372
		0	3.57088	0.385056			0	3.57088	0.146427
		0	3.58112	0.35815			0	3.58112	0.122154
		0	3.59136	0.271137			0	3.59136	0.0532074
		0	3.6016	0.209126			0	3.6016	0.0197563
		0	3.61184	0.180412			0	3.61184	0.0680962
		0	3.62208	0.150368			0	3.62208	0.105515
		0	3.63232	0.159939			0	3.63232	0.112061
		0	3.64256	0.148987			0	3.64256	0.160469
		0	3.6528	0.172138			0	3.6528	0.282246
		0	3.66304	0.106487			0	3.66304	0.218872
		0	3.67328	0.196838			0	3.67328	0.182835
		0	3.68352	0.355873			0	3.68352	0.172215
		0	3.69376	0.374531			0	3.69376	0.162891
		0	3.704	0.374733			0	3.704	0.128368
		0	3.71424	0.302872			0	3.71424	0.12888
		0	3.72448	0.244781			0	3.72448	0.145512
		0	3.73472	0.162373			0	3.73472	0.0825462
		0	3.74496	0.209305			0	3.74496	0.0458984
		0	3.7552	0.35405			0	3.7552	0.0347672
		0	3.76544	0.364876			0	3.76544	0.12875
		0	3.77568	0.290085			0	3.77568	0.139122
		0	3.78592	0.294956			0	3.78592	-0.0156097
		0	3.79616	0.280746			0	3.79616	-0.0388794
		0	3.8064	0.124249			0	3.8064	0.0199852
		0	3.81664	0.0477066			0	3.81664	0.0495491
		0	3.82688	0.109085			0	3.82688	-0.0247421
		0	3.83712	0.108967			0	3.83712	-0.0394287
		0	3.84736	0.103386			0	3.84736	0.000793457
		0	3.8576	0.138996			0	3.8576	0.0184326
		0	3.86784	0.126465			0	3.86784	0.0506783
		0	3.87808	0.115345			0	3.87808	-0.0500298
		0	3.88832	0.142216			0	3.88832	-0.0505295
		0	3.89856	0.108704			0	3.89856	-0.0820122
		0	3.9088	0.173077			0	3.9088	-0.154037
		0	3.91904	0.280247			0	3.91904	-0.0992393
		0	3.92928	0.296997			0	3.92928	0.0316048
		0	3.93952	0.190495			0	3.93952	0.0126266
		0	3.94976	0.15863			0	3.94976	-0.0609245
		0	3.96	0.130806			0	3.96	-0.156372
		0	3.97024	0.197586			0	3.97024	-0.109871
		0	3.98048	0.235867			0	3.98048	-0.0872955
		0	3.99072	0.169666			0	3.99072	-0.0697098
		0	4.00096	0.154972			0	4.00096	-0.0545845
		0	4.0112	0.16713			0	4.0112	-0.0459366
		0	4.02144	0.16013			0	4.02144	-0.0452118
		0	4.03168	0.170456			0	4.03168	-0.0716553
		0	4.04192	0.130974			0	4.04192	-0.0745621
		0	4.05216	0.123333			0	4.05216	-0.111256
		0	4.0624	0.124119			0	4.0624	-0.0883789
		0	4.07264	0.10918			0	4.07264	-0.0520668
		0	4.08288	0.0614243			0	4.08288	-0.0505295
		0	4.09312	0.0728226			0	4.09312	-0.113243
		0	4.10336	0.123604			0	4.10336	-0.129448
		0	4.1136	0.158962			0	4.1136	-0.137005
		0	4.12384	0.0796661			0	4.12384	-0.165688
		0	4.13408	-0.0573311			0	4.13408	-0.199398
		0	4.14432	-0.0503311			0	4.14432	-0.242992
		0	4.15456	-0.00765228			0	4.15456	-0.16951
		0	4.1648	0.107407			0	4.1648	-0.258385
		0	4.17504	0.0446396			0	4.17504	-0.294838
		0	4.18528	-0.059391			0	4.18528	-0.20277
		0	4.19552	-0.101448			0	4.19552	-0.162754
		0	4.20576	-0.116562			0	4.20576	-0.118584
		0	4.216	-0.104645			0	4.216	-0.161587
		0	4.22624	0.0424232			0	4.22624	-0.048275
		0	4.23648	0.15683			0	4.23648	-0.0856476
		0	4.24672	0.0706291			0	4.24672	-0.204285
		0	4.25696	0.0817375			0	4.25696	-0.283775
		0	4.2672	0.128849			0	4.2672	-0.254665
		0	4.27744	0.124645			0	4.27744	-0.244843
		0	4.28768	0.0538673			0	4.28768	-0.274559
		0	4.29792	-0.0156555			0	4.29792	-0.327644
		0	4.30816	0.0470505			0	4.30816	-0.270973
		0	4.3184	-0.0098381			0	4.3184	-0.252781
		0	4.32864	-0.138489			0	4.32864	-0.282902
		0	4.33888	-0.222351			0	4.33888	-0.213261
		0	4.34912	-0.197052			0	4.34912	-0.111195
		0	4.35936	-0.198143			0	4.35936	-0.0803185
		0	4.3696	-0.25362			0	4.3696	-0.0967598
		0	4.37984	-0.231735			0	4.37984	-0.115021
		0	4.39008	-0.27478			0	4.39008	-0.166618
		0	4.40032	-0.238792			0	4.40032	-0.152367
		0	4.41056	-0.209465			0	4.41056	-0.217613
		0	4.4208	-0.220932			0	4.4208	-0.310608
		0	4.43104	-0.110023			0	4.43104	-0.395355
		0	4.44128	-0.037529			0	4.44128	-0.387581
		0	4.45152	-0.0835648			0	4.45152	-0.387901
		0	4.46176	-0.0202675			0	4.46176	-0.358315
		0	4.472	-0.0840569			0	4.472	-0.334534
		0	4.48224	-0.0511398			0	4.48224	-0.264568
		0	4.49248	-0.11026			0	4.49248	-0.181969
		0	4.50272	-0.139992			0	4.50272	-0.232956
		0	4.51296	-0.170017			0	4.51296	-0.211639
		0	4.5232	-0.172558			0	4.5232	-0.258347
		0	4.53344	-0.192612			0	4.53344	-0.287495
		0	4.54368	-0.245979			0	4.54368	-0.243896
		0	4.55392	-0.224152			0	4.55392	-0.234455
		0	4.56416	-0.245037			0	4.56416	-0.248451
		0	4.5744	-0.210732			0	4.5744	-0.16188
		0	4.58464	-0.28273			0	4.58464	-0.105675
		0	4.59488	-0.312798			0	4.59488	-0.0543556
		0	4.60512	-0.315598			0	4.60512	-0.0386429
		0	4.61536	-0.213554			0	4.61536	0.103382
		0	4.6256	-0.23605			0	4.6256	0.0381393
		0	4.63584	-0.174644			0	4.63584	-0.00526428
		0	4.64608	-0.153637			0	4.64608	-0.081192
		0	4.65632	-0.200989			0	4.65632	-0.0629768
		0	4.66656	-0.163773			0	4.66656	-0.0666733
		0	4.6768	-0.17392			0	4.6768	-0.0969505
		0	4.68704	-0.265255			0	4.68704	-0.0626755
		0	4.69728	-0.436775			0	4.69728	-0.0346146
		0	4.70752	-0.450756			0	4.70752	0.0366821
		0	4.71776	-0.423111			0	4.71776	0.00410461
		0	4.728	-0.366917			0	4.728	-0.0238266
		0	4.73824	-0.349442			0	4.73824	0.00530624
		0	4.74848	-0.297707			0	4.74848	0.121384
		0	4.75872	-0.323227			0	4.75872	0.203743
		0	4.76896	-0.285904			0	4.76896	0.164585
		0	4.7792	-0.312019			0	4.7792	0.0745583
		0	4.78944	-0.294655			0	4.78944	0.0277176
		0	4.79968	-0.288223			0	4.79968	0.021225
		0	4.80992	-0.330368			0	4.80992	0.0765839
		0	4.82016	-0.381794			0	4.82016	0.218491
		0	4.8304	-0.378395			0	4.8304	0.2458
		0	4.84064	-0.374474			0	4.84064	0.329548
		0	4.85088	-0.354076			0	4.85088	0.252335
		0	4.86112	-0.238861			0	4.86112	0.253754
		0	4.87136	-0.200977			0	4.87136	0.25338
		0	4.8816	-0.234215			0	4.8816	0.239815
		0	4.89184	-0.340584			0	4.89184	0.29258
		0	4.90208	-0.436153			0	4.90208	0.353413
		0	4.91232	-0.386444			0	4.91232	0.344425
		0	4.92256	-0.380459			0	4.92256	0.290218
		0	4.9328	-0.430576			0	4.9328	0.178329
		0	4.94304	-0.40567			0	4.94304	0.170197
		0	4.95328	-0.454262			0	4.95328	0.313679
		0	4.96352	-0.388004			0	4.96352	0.390224
		0	4.97376	-0.410557			0	4.97376	0.327068
		0	4.984	-0.392414			0	4.984	0.345234
		0	4.99424	-0.558353			0	4.99424	0.382736
		0	5.00448	-0.678017			0	5.00448	0.488525
		0	5.01472	-0.60498			0	5.01472	0.50489
		0	5.02496	-0.488178			0	5.02496	0.539913
		0	5.0352	-0.528519			0	5.0352	0.559822
		0	5.04544	-0.527206			0	5.04544	0.665382
		0	5.05568	-0.441383			0	5.05568	0.683815
		0	5.06592	-0.3452			0	5.06592	0.617661
		0	5.07616	-0.275936			0	5.07616	0.674191
		0	5.0864	-0.318504			0	5.0864	0.489716
		0	5.09664	-0.27689			0	5.09664	0.446823
		0	5.10688	-0.266006			0	5.10688	0.48061
		0	5.11712	-0.306202			0	5.11712	0.459877
		0	5.12736	-0.321022			0	5.12736	0.461067
		0	5.1376	-0.256577			0	5.1376	0.47224
		0	5.14784	-0.306442			0	5.14784	0.57346
		0	5.15808	-0.387611			0	5.15808	0.59996
		0	5.16832	-0.477211			0	5.16832	0.590664
		0	5.17856	-0.414246			0	5.17856	0.525478
		0	5.1888	-0.321938			0	5.1888	0.5891
		0	5.19904	-0.282993			0	5.19904	0.537876
		0	5.20928	-0.244354			0	5.20928	0.517166
		0	5.21952	-0.34597			0	5.21952	0.519455
		0	5.22976	-0.360203			0	5.22976	0.467354
		0	5.24	-0.385204			0	5.24	0.509895
		0	5.25024	-0.350311			0	5.25024	0.671257
		0	5.26048	-0.354996			0	5.26048	0.683933
		0	5.27072	-0.32629			0	5.27072	0.582138
		0	5.28096	-0.224949			0	5.28096	0.446491
		0	5.2912	-0.200382			0	5.2912	0.353828
		0	5.30144	-0.166634			0	5.30144	0.284878
		0	5.31168	-0.136772			0	5.31168	0.361336
		0	5.32192	-0.202133			0	5.32192	0.354851
		0	5.33216	-0.154236			0	5.33216	0.401096
		0	5.3424	-0.02314			0	5.3424	0.403038
		0	5.35264	0.0727501			0	5.35264	0.35218
		0	5.36288	-0.0278473			0	5.36288	0.362518
		0	5.37312	-0.020504			0	5.37312	0.57159
		0	5.38336	-0.0247154			0	5.38336	0.570827
		0	5.3936	0.00379944			0	5.3936	0.571053
		0	5.40384	0.0586243			0	5.40384	0.512589
		0	5.41408	0.0192947			0	5.41408	0.523628
		0	5.42432	-0.0250969			0	5.42432	0.605217
		0	5.43456	0.131725			0	5.43456	0.54174
		0	5.4448	0.142647			0	5.4448	0.543003
		0	5.45504	0.124977			0	5.45504	0.502815
[truncated: 358,394+ more rows]

## Sheet: panel B
		Top panel					Bottom panel
		Sound level (dB)	Post-stimulus time (ms)	Vm rel (mV)			Sound level (dB)	Post-stimulus time (ms)	Vm rel (mV)
		-10	3.00768	0.263397			-10	3.00768	-0.329609
		-10	3.01792	0.294941			-10	3.01792	-0.322506
		-10	3.02816	0.391953			-10	3.02816	-0.200626
		-10	3.0384	0.476818			-10	3.0384	-0.0800934
		-10	3.04864	0.534683			-10	3.04864	-0.0204773
		-10	3.05888	0.455029			-10	3.05888	-0.164005
		-10	3.06912	0.481979			-10	3.06912	-0.18457
		-10	3.07936	0.518448			-10	3.07936	-0.074501
		-10	3.0896	0.561531			-10	3.0896	-0.0332069
		-10	3.09984	0.693077			-10	3.09984	-0.197441
		-10	3.11008	0.632149			-10	3.11008	-0.225315
		-10	3.12032	0.552158			-10	3.12032	-0.146614
		-10	3.13056	0.483078			-10	3.13056	-0.124714
		-10	3.1408	0.493282			-10	3.1408	-0.212463
		-10	3.15104	0.52076			-10	3.15104	-0.189648
		-10	3.16128	0.561756			-10	3.16128	-0.215515
		-10	3.17152	0.601131			-10	3.17152	-0.23782
		-10	3.18176	0.484379			-10	3.18176	-0.199745
		-10	3.192	0.384121			-10	3.192	-0.150379
		-10	3.20224	0.384895			-10	3.20224	-0.121819
		-10	3.21248	0.384064			-10	3.21248	-0.144096
		-10	3.22272	0.435349			-10	3.22272	-0.164577
		-10	3.23296	0.381844			-10	3.23296	-0.124832
		-10	3.2432	0.21965			-10	3.2432	-0.123688
		-10	3.25344	0.186855			-10	3.25344	-0.303848
		-10	3.26368	0.169544			-10	3.26368	-0.403507
		-10	3.27392	0.116497			-10	3.27392	-0.415989
		-10	3.28416	0.0198441			-10	3.28416	-0.3615
		-10	3.2944	-0.0202942			-10	3.2944	-0.362617
		-10	3.30464	-0.00488281			-10	3.30464	-0.321911
		-10	3.31488	-0.049263			-10	3.31488	-0.369808
		-10	3.32512	0.0417786			-10	3.32512	-0.429531
		-10	3.33536	0.076767			-10	3.33536	-0.466759
		-10	3.3456	0.163345			-10	3.3456	-0.570187
		-10	3.35584	0.269527			-10	3.35584	-0.543221
		-10	3.36608	0.354988			-10	3.36608	-0.465927
		-10	3.37632	0.146622			-10	3.37632	-0.445755
		-10	3.38656	0.0107727			-10	3.38656	-0.578423
		-10	3.3968	-0.0198555			-10	3.3968	-0.623558
		-10	3.40704	-0.0477028			-10	3.40704	-0.457642
		-10	3.41728	-0.0617905			-10	3.41728	-0.368973
		-10	3.42752	-0.0101013			-10	3.42752	-0.422199
		-10	3.43776	-0.0468063			-10	3.43776	-0.51622
		-10	3.448	-0.165157			-10	3.448	-0.505493
		-10	3.45824	-0.182659			-10	3.45824	-0.607414
		-10	3.46848	-0.125221			-10	3.46848	-0.598606
		-10	3.47872	-0.213295			-10	3.47872	-0.612019
		-10	3.48896	-0.292225			-10	3.48896	-0.503845
		-10	3.4992	-0.404125			-10	3.4992	-0.534054
		-10	3.50944	-0.532883			-10	3.50944	-0.523945
		-10	3.51968	-0.654346			-10	3.51968	-0.657757
		-10	3.52992	-0.710732			-10	3.52992	-0.770565
		-10	3.54016	-0.741379			-10	3.54016	-0.907085
		-10	3.5504	-0.801556			-10	3.5504	-1.01393
		-10	3.56064	-0.859039			-10	3.56064	-1.03474
		-10	3.57088	-0.730293			-10	3.57088	-1.02529
		-10	3.58112	-0.609917			-10	3.58112	-0.963924
		-10	3.59136	-0.595528			-10	3.59136	-0.917133
		-10	3.6016	-0.666576			-10	3.6016	-0.788746
		-10	3.61184	-0.605183			-10	3.61184	-0.787647
		-10	3.62208	-0.516205			-10	3.62208	-0.892197
		-10	3.63232	-0.470978			-10	3.63232	-0.96508
		-10	3.64256	-0.46981			-10	3.64256	-1.06063
		-10	3.6528	-0.499207			-10	3.6528	-1.15124
		-10	3.66304	-0.449745			-10	3.66304	-1.21045
		-10	3.67328	-0.446468			-10	3.67328	-1.20705
		-10	3.68352	-0.46125			-10	3.68352	-1.08368
		-10	3.69376	-0.468117			-10	3.69376	-1.11012
		-10	3.704	-0.641174			-10	3.704	-1.18076
		-10	3.71424	-0.623207			-10	3.71424	-1.25988
		-10	3.72448	-0.590305			-10	3.72448	-1.23536
		-10	3.73472	-0.538082			-10	3.73472	-1.23322
		-10	3.74496	-0.536781			-10	3.74496	-1.22585
		-10	3.7552	-0.661964			-10	3.7552	-1.19138
		-10	3.76544	-0.7654			-10	3.76544	-1.15538
		-10	3.77568	-0.77092			-10	3.77568	-1.19123
		-10	3.78592	-0.649254			-10	3.78592	-1.2177
		-10	3.79616	-0.657265			-10	3.79616	-1.22329
		-10	3.8064	-0.681644			-10	3.8064	-1.35883
		-10	3.81664	-0.762123			-10	3.81664	-1.45099
		-10	3.82688	-0.751038			-10	3.82688	-1.49442
		-10	3.83712	-0.813358			-10	3.83712	-1.50573
		-10	3.84736	-0.892086			-10	3.84736	-1.46175
		-10	3.8576	-1.06628			-10	3.8576	-1.50758
		-10	3.86784	-1.15492			-10	3.86784	-1.84631
		-10	3.87808	-1.0912			-10	3.87808	-2.07285
		-10	3.88832	-1.05647			-10	3.88832	-1.96876
		-10	3.89856	-0.909702			-10	3.89856	-1.80293
		-10	3.9088	-0.879974			-10	3.9088	-1.70646
		-10	3.91904	-0.963146			-10	3.91904	-1.601
		-10	3.92928	-1.00543			-10	3.92928	-1.47929
		-10	3.93952	-0.973755			-10	3.93952	-1.37902
		-10	3.94976	-0.825317			-10	3.94976	-1.3145
		-10	3.96	-0.830166			-10	3.96	-1.15444
		-10	3.97024	-0.913696			-10	3.97024	-1.13591
		-10	3.98048	-1.02761			-10	3.98048	-1.03702
		-10	3.99072	-1.00974			-10	3.99072	-0.941036
		-10	4.00096	-0.867481			-10	4.00096	-0.99276
		-10	4.0112	-0.738495			-10	4.0112	-1.16431
		-10	4.02144	-0.667019			-10	4.02144	-1.2618
		-10	4.03168	-0.686996			-10	4.03168	-1.25043
		-10	4.04192	-0.793163			-10	4.04192	-1.17132
		-10	4.05216	-0.856644			-10	4.05216	-1.15943
		-10	4.0624	-0.84943			-10	4.0624	-1.02771
		-10	4.07264	-0.776596			-10	4.07264	-1.04141
		-10	4.08288	-0.681263			-10	4.08288	-1.17356
		-10	4.09312	-0.735764			-10	4.09312	-1.29025
		-10	4.10336	-0.773937			-10	4.10336	-1.43309
		-10	4.1136	-0.786118			-10	4.1136	-1.44461
		-10	4.12384	-0.683121			-10	4.12384	-1.47005
		-10	4.13408	-0.634594			-10	4.13408	-1.45896
		-10	4.14432	-0.651077			-10	4.14432	-1.46481
		-10	4.15456	-0.707119			-10	4.15456	-1.50599
		-10	4.1648	-0.74535			-10	4.1648	-1.43541
		-10	4.17504	-0.767441			-10	4.17504	-1.39249
		-10	4.18528	-0.889416			-10	4.18528	-1.44443
		-10	4.19552	-0.952538			-10	4.19552	-1.36151
		-10	4.20576	-0.932793			-10	4.20576	-1.31667
		-10	4.216	-0.856201			-10	4.216	-1.32326
		-10	4.22624	-0.765018			-10	4.22624	-1.25428
		-10	4.23648	-0.571472			-10	4.23648	-1.26338
		-10	4.24672	-0.494556			-10	4.24672	-1.33382
		-10	4.25696	-0.445084			-10	4.25696	-1.41818
		-10	4.2672	-0.573547			-10	4.2672	-1.47219
		-10	4.27744	-0.682766			-10	4.27744	-1.5328
		-10	4.28768	-0.753922			-10	4.28768	-1.52631
		-10	4.29792	-0.857182			-10	4.29792	-1.3908
		-10	4.30816	-0.979141			-10	4.30816	-1.25025
		-10	4.3184	-1.08937			-10	4.3184	-1.23178
		-10	4.32864	-1.11963			-10	4.32864	-1.25491
		-10	4.33888	-1.07925			-10	4.33888	-1.28182
		-10	4.34912	-0.999886			-10	4.34912	-1.33793
		-10	4.35936	-0.851398			-10	4.35936	-1.3159
		-10	4.3696	-0.746971			-10	4.3696	-1.40621
		-10	4.37984	-0.642319			-10	4.37984	-1.53224
		-10	4.39008	-0.656742			-10	4.39008	-1.54269
		-10	4.40032	-0.626854			-10	4.40032	-1.45053
		-10	4.41056	-0.671047			-10	4.41056	-1.42215
		-10	4.4208	-0.78804			-10	4.4208	-1.44908
		-10	4.43104	-0.732094			-10	4.43104	-1.46301
		-10	4.44128	-0.740997			-10	4.44128	-1.51778
		-10	4.45152	-0.622124			-10	4.45152	-1.60606
		-10	4.46176	-0.52504			-10	4.46176	-1.61713
		-10	4.472	-0.493389			-10	4.472	-1.54776
		-10	4.48224	-0.425522			-10	4.48224	-1.45967
		-10	4.49248	-0.367527			-10	4.49248	-1.2993
		-10	4.50272	-0.399834			-10	4.50272	-1.2494
		-10	4.51296	-0.369434			-10	4.51296	-1.26713
		-10	4.5232	-0.250595			-10	4.5232	-1.31044
		-10	4.53344	-0.162296			-10	4.53344	-1.27266
		-10	4.54368	-0.167339			-10	4.54368	-1.21866
		-10	4.55392	-0.149506			-10	4.55392	-1.2389
		-10	4.56416	-0.178032			-10	4.56416	-1.2804
		-10	4.5744	-0.113338			-10	4.5744	-1.35594
		-10	4.58464	-0.0677032			-10	4.58464	-1.33652
		-10	4.59488	-0.0468292			-10	4.59488	-1.35296
		-10	4.60512	-0.0307846			-10	4.60512	-1.3511
		-10	4.61536	-0.0100784			-10	4.61536	-1.26106
		-10	4.6256	-0.0420265			-10	4.6256	-1.13025
		-10	4.63584	-0.235897			-10	4.63584	-1.07393
		-10	4.64608	-0.19812			-10	4.64608	-1.15083
		-10	4.65632	-0.236935			-10	4.65632	-1.15723
		-10	4.66656	-0.176876			-10	4.66656	-1.07623
		-10	4.6768	-0.101013			-10	4.6768	-1.12034
		-10	4.68704	0.0214386			-10	4.68704	-1.1918
		-10	4.69728	-0.36747			-10	4.69728	-1.3054
		-10	4.70752	-0.723545			-10	4.70752	-1.34412
		-10	4.71776	-0.755722			-10	4.71776	-1.2469
		-10	4.728	-0.527008			-10	4.728	-1.24509
		-10	4.73824	-0.285511			-10	4.73824	-1.26525
		-10	4.74848	-0.119526			-10	4.74848	-1.28599
		-10	4.75872	0.0388222			-10	4.75872	-1.31321
		-10	4.76896	0.0846939			-10	4.76896	-1.38541
		-10	4.7792	0.225658			-10	4.7792	-1.43874
		-10	4.78944	0.279243			-10	4.78944	-1.41148
		-10	4.79968	0.24894			-10	4.79968	-1.35736
		-10	4.80992	0.240547			-10	4.80992	-1.2943
		-10	4.82016	0.170261			-10	4.82016	-1.27363
		-10	4.8304	0.226505			-10	4.8304	-1.26654
		-10	4.84064	0.265556			-10	4.84064	-1.35751
		-10	4.85088	0.18013			-10	4.85088	-1.33298
		-10	4.86112	0.0703735			-10	4.86112	-1.27235
		-10	4.87136	0.056942			-10	4.87136	-1.28925
		-10	4.8816	0.147301			-10	4.8816	-1.31199
		-10	4.89184	0.310226			-10	4.89184	-1.19408
		-10	4.90208	0.35482			-10	4.90208	-1.09663
		-10	4.91232	0.37561			-10	4.91232	-1.05075
		-10	4.92256	0.2616			-10	4.92256	-1.07817
		-10	4.9328	0.181217			-10	4.9328	-1.24844
		-10	4.94304	0.130348			-10	4.94304	-1.30343
		-10	4.95328	0.0734634			-10	4.95328	-1.23375
		-10	4.96352	0.038559			-10	4.96352	-1.13594
		-10	4.97376	0.0500984			-10	4.97376	-1.09954
		-10	4.984	-0.10268			-10	4.984	-1.0029
		-10	4.99424	-0.234943			-10	4.99424	-1.08852
		-10	5.00448	-0.18161			-10	5.00448	-1.14364
		-10	5.01472	-0.00895691			-10	5.01472	-1.21116
		-10	5.02496	0.0503616			-10	5.02496	-1.23616
		-10	5.0352	0.121136			-10	5.0352	-1.1518
		-10	5.04544	0.178535			-10	5.04544	-1.05104
		-10	5.05568	0.219067			-10	5.05568	-1.0104
		-10	5.06592	0.192543			-10	5.06592	-1.03409
		-10	5.07616	0.259407			-10	5.07616	-1.09279
		-10	5.0864	0.278538			-10	5.0864	-1.12483
		-10	5.09664	0.291687			-10	5.09664	-1.1174
		-10	5.10688	0.345222			-10	5.10688	-1.08701
		-10	5.11712	0.323887			-10	5.11712	-1.09188
		-10	5.12736	0.179058			-10	5.12736	-1.15252
		-10	5.1376	0.174042			-10	5.1376	-1.09206
		-10	5.14784	0.0582504			-10	5.14784	-1.12369
		-10	5.15808	-0.0986748			-10	5.15808	-1.14039
		-10	5.16832	0.0341721			-10	5.16832	-1.19498
		-10	5.17856	0.122135			-10	5.17856	-1.13567
		-10	5.1888	0.113316			-10	5.1888	-1.10881
		-10	5.19904	0.177616			-10	5.19904	-1.15498
		-10	5.20928	0.194199			-10	5.20928	-1.26451
		-10	5.21952	0.0606461			-10	5.21952	-1.31046
		-10	5.22976	-0.0382004			-10	5.22976	-1.2881
		-10	5.24	-0.0935135			-10	5.24	-1.28005
		-10	5.25024	-0.0752869			-10	5.25024	-1.36108
		-10	5.26048	-0.0239792			-10	5.26048	-1.29225
		-10	5.27072	0.0634003			-10	5.27072	-1.20691
		-10	5.28096	0.0992126			-10	5.28096	-1.2153
		-10	5.2912	0.0802574			-10	5.2912	-1.24224
		-10	5.30144	0.0934525			-10	5.30144	-1.12956
		-10	5.31168	0.159126			-10	5.31168	-0.978348
		-10	5.32192	0.314911			-10	5.32192	-0.84623
		-10	5.33216	0.355499			-10	5.33216	-0.816044
		-10	5.3424	0.338264			-10	5.3424	-0.887928
		-10	5.35264	0.32547			-10	5.35264	-0.924633
		-10	5.36288	0.197716			-10	5.36288	-0.936638
		-10	5.37312	0.157852			-10	5.37312	-0.939449
		-10	5.38336	0.108368			-10	5.38336	-0.958572
		-10	5.3936	0.186031			-10	5.3936	-1.05694
		-10	5.40384	0.282593			-10	5.40384	-1.15421
		-10	5.41408	0.338287			-10	5.41408	-1.18638
		-10	5.42432	0.397152			-10	5.42432	-1.18144
		-10	5.43456	0.51952			-10	5.43456	-1.0708
		-10	5.4448	0.652035			-10	5.4448	-0.975975
		-10	5.45504	0.616913			-10	5.45504	-0.931904
		-10	5.46528	0.575859			-10	5.46528	-0.995739
		-10	5.47552	0.387936			-10	5.47552	-1.00226
		-10	5.48576	0.282402			-10	5.48576	-0.91991
		-10	5.496	0.301857			-10	5.496	-0.772949
		-10	5.50624	0.372261			-10	5.50624	-0.72908
		-10	5.51648	0.444775			-10	5.51648	-0.836071
		-10	5.52672	0.352795			-10	5.52672	-0.999054
		-10	5.53696	0.344414			-10	5.53696	-1.01739
		-10	5.5472	0.392742			-10	5.5472	-1.05114
		-10	5.55744	0.413483			-10	5.55744	-1.05209
		-10	5.56768	0.389763			-10	5.56768	-1.08562
		-10	5.57792	0.463779			-10	5.57792	-1.00418
		-10	5.58816	0.552719			-10	5.58816	-0.911148
		-10	5.5984	0.609451			-10	5.5984	-0.864574
		-10	5.60864	0.552971			-10	5.60864	-0.825665
		-10	5.61888	0.450569			-10	5.61888	-0.838108
		-10	5.62912	0.457603			-10	5.62912	-0.851471
		-10	5.63936	0.395054			-10	5.63936	-0.909695
		-10	5.6496	0.382751			-10	5.6496	-0.967201
		-10	5.65984	0.404697			-10	5.65984	-1.06523
		-10	5.67008	0.444572			-10	5.67008	-1.24986
		-10	5.68032	0.633995			-10	5.68032	-1.314
		-10	5.69056	0.740177			-10	5.69056	-1.18594
		-10	5.7008	0.720306			-10	5.7008	-1.10139
		-10	5.71104	0.663609			-10	5.71104	-1.01605
		-10	5.72128	0.675697			-10	5.72128	-0.946827
		-10	5.73152	0.693863			-10	5.73152	-0.984642
		-10	5.74176	0.676567			-10	5.74176	-1.02682
		-10	5.752	0.707035			-10	5.752	-1.03223
		-10	5.76224	0.672741			-10	5.76224	-1.11246
		-10	5.77248	0.688595			-10	5.77248	-1.11488
		-10	5.78272	0.74292			-10	5.78272	-1.10236
		-10	5.79296	0.889961			-10	5.79296	-1.11149
		-10	5.8032	0.954311			-10	5.8032	-1.21169
		-10	5.81344	1.02354			-10	5.81344	-1.23347
		-10	5.82368	1.07974			-10	5.82368	-1.26893
		-10	5.83392	1.00517			-10	5.83392	-1.24192
		-10	5.84416	1.0663			-10	5.84416	-1.06211
		-10	5.8544	1.1116			-10	5.8544	-0.937923
		-10	5.86464	1.26165			-10	5.86464	-0.83923
		-10	5.87488	1.27118			-10	5.87488	-0.759087
		-10	5.88512	1.3285			-10	5.88512	-0.811813
		-10	5.89536	1.35305			-10	5.89536	-0.878735
		-10	5.9056	1.39774			-10	5.9056	-0.948734
		-10	5.91584	1.45053			-10	5.91584	-0.910206
		-10	5.92608	1.40931			-10	5.92608	-0.888439
		-10	5.93632	1.40876			-10	5.93632	-0.915466
		-10	5.94656	1.3598			-10	5.94656	-0.988491
		-10	5.9568	1.36255			-10	5.9568	-1.02382
		-10	5.96704	1.32682			-10	5.96704	-1.0383
		-10	5.97728	1.29227			-10	5.97728	-1.0557
		-10	5.98752	1.23306			-10	5.98752	-1.04898
		-10	5.99776	1.24464			-10	5.99776	-1.09119
		-10	6.008	1.29574			-10	6.008	-1.05847
		-10	6.01824	1.24022			-10	6.01824	-1.06004
		-10	6.02848	1.16013			-10	6.02848	-1.01723
		-10	6.03872	1.07364			-10	6.03872	-0.88652
		-10	6.04896	1.2029			-10	6.04896	-0.857971
		-10	6.0592	1.20287			-10	6.0592	-0.887951
		-10	6.06944	1.30057			-10	6.06944	-0.881691
		-10	6.07968	1.38512			-10	6.07968	-0.923534
		-10	6.08992	1.47838			-10	6.08992	-0.961109
		-10	6.10016	1.58231			-10	6.10016	-1.01533
		-10	6.1104	1.70228			-10	6.1104	-1.05085
		-10	6.12064	1.74105			-10	6.12064	-1.13342
		-10	6.13088	1.68074			-10	6.13088	-1.09282
		-10	6.14112	1.67953			-10	6.14112	-1.10627
		-10	6.15136	1.58624			-10	6.15136	-1.19135
		-10	6.1616	1.47987			-10	6.1616	-1.1875
		-10	6.17184	1.43371			-10	6.17184	-1.08319
		-10	6.18208	1.44636			-10	6.18208	-1.016
		-10	6.19232	1.50562			-10	6.19232	-1.09418
		-10	6.20256	1.53973			-10	6.20256	-1.21
		-10	6.2128	1.5497			-10	6.2128	-1.23344
		-10	6.22304	1.54453			-10	6.22304	-1.32743
		-10	6.23328	1.66053			-10	6.23328	-1.36168
		-10	6.24352	1.81965			-10	6.24352	-1.33849
		-10	6.25376	1.80966			-10	6.25376	-1.25619
		-10	6.264	1.67667			-10	6.264	-1.22283
		-10	6.27424	1.65837			-10	6.27424	-1.35963
		-10	6.28448	1.75465			-10	6.28448	-1.33748
		-10	6.29472	1.76397			-10	6.29472	-1.36873
		-10	6.30496	1.7817			-10	6.30496	-1.34244
		-10	6.3152	1.74388			-10	6.3152	-1.33688
		-10	6.32544	1.85216			-10	6.32544	-1.42136
		-10	6.33568	1.91431			-10	6.33568	-1.38594
		-10	6.34592	1.88878			-10	6.34592	-1.30748
		-10	6.35616	1.75018			-10	6.35616	-1.20599
		-10	6.3664	1.83582			-10	6.3664	-1.06553
		-10	6.37664	1.87082			-10	6.37664	-1.02899
		-10	6.38688	1.8166			-10	6.38688	-1.02433
		-10	6.39712	1.74603			-10	6.39712	-1.10352
		-10	6.40736	1.66966			-10	6.40736	-1.22368
		-10	6.4176	1.71004			-10	6.4176	-1.27288
		-10	6.42784	1.71873			-10	6.42784	-1.36972
		-10	6.43808	1.6562			-10	6.43808	-1.40606
		-10	6.44832	1.53602			-10	6.44832	-1.50196
		-10	6.45856	1.5423			-10	6.45856	-1.56144
		-10	6.4688	1.55696			-10	6.4688	-1.48679
		-10	6.47904	1.60394			-10	6.47904	-1.49168
		-10	6.48928	1.5863			-10	6.48928	-1.3914
		-10	6.49952	1.66616			-10	6.49952	-1.29677
		-10	6.50976	1.70265			-10	6.50976	-1.20984
		-10	6.52	1.65609			-10	6.52	-1.27111
		-10	6.53024	1.66145			-10	6.53024	-1.40973
		-10	6.54048	1.69367			-10	6.54048	-1.46133
		-10	6.55072	1.76711			-10	6.55072	-1.42277
		-10	6.56096	1.89153			-10	6.56096	-1.51181
		-10	6.5712	1.9184			-10	6.5712	-1.5773
		-10	6.58144	1.83707			-10	6.58144	-1.5482
		-10	6.59168	1.73126			-10	6.59168	-1.5068
		-10	6.60192	1.58754			-10	6.60192	-1.36915
		-10	6.61216	1.61227			-10	6.61216	-1.24596
		-10	6.6224	1.63097			-10	6.6224	-1.18124
		-10	6.63264	1.61628			-10	6.63264	-1.18588
		-10	6.64288	1.53896			-10	6.64288	-1.13738
		-10	6.65312	1.59676			-10	6.65312	-1.08767
		-10	6.66336	1.77638			-10	6.66336	-1.03551
		-10	6.6736	1.78762			-10	6.6736	-1.05548
		-10	6.68384	1.70638			-10	6.68384	-1.03629
		-10	6.69408	1.6865			-10	6.69408	-1.13696
		-10	6.70432	1.6352			-10	6.70432	-1.23771
		-10	6.71456	1.60476			-10	6.71456	-1.36418
		-10	6.7248	1.50191			-10	6.7248	-1.45703
		-10	6.73504	1.53348			-10	6.73504	-1.40992
		-10	6.74528	1.59719			-10	6.74528	-1.45576
		-10	6.75552	1.65384			-10	6.75552	-1.5499
		-10	6.76576	1.65922			-10	6.76576	-1.62837
		-10	6.776	1.63521			-10	6.776	-1.65808
		-10	6.78624	1.62283			-10	6.78624	-1.75329
		-10	6.79648	1.55125			-10	6.79648	-1.743
		-10	6.80672	1.52724			-10	6.80672	-1.56526
		-10	6.81696	1.45168			-10	6.81696	-1.46092
		-10	6.8272	1.35493			-10	6.8272	-1.40937
		-10	6.83744	1.30259			-10	6.83744	-1.26426
		-10	6.84768	1.33284			-10	6.84768	-1.2173
		-10	6.85792	1.41091			-10	6.85792	-1.27892
		-10	6.86816	1.43457			-10	6.86816	-1.26791
		-10	6.8784	1.50129			-10	6.8784	-1.20213
		-10	6.88864	1.56361			-10	6.88864	-1.16493
		-10	6.89888	1.58127			-10	6.89888	-1.18494
		-10	6.90912	1.55476			-10	6.90912	-1.2331
		-10	6.91936	1.54856			-10	6.91936	-1.26416
		-10	6.9296	1.48603			-10	6.9296	-1.36541
		-10	6.93984	1.41128			-10	6.93984	-1.4615
		-10	6.95008	1.3722			-10	6.95008	-1.51334
		-10	6.96032	1.41545			-10	6.96032	-1.46172
		-10	6.97056	1.38475			-10	6.97056	-1.47907
		-10	6.9808	1.41771			-10	6.9808	-1.41731
		-10	6.99104	1.35276			-10	6.99104	-1.39904
		-10	7.00128	1.36778			-10	7.00128	-1.42843
		-10	7.01152	1.34764			-10	7.01152	-1.41639
		-10	7.02176	1.26075			-10	7.02176	-1.41853
		-10	7.032	1.302			-10	7.032	-1.35646
		-10	7.04224	1.25702			-10	7.04224	-1.40154
		-10	7.05248	1.31284			-10	7.05248	-1.4306
		-10	7.06272	1.44386			-10	7.06272	-1.47984
		-10	7.07296	1.54018			-10	7.07296	-1.44826
		-10	7.0832	1.60316			-10	7.0832	-1.38025
		-10	7.09344	1.69416			-10	7.09344	-1.44468
		-10	7.10368	1.75106			-10	7.10368	-1.49948
		-10	7.11392	1.77583			-10	7.11392	-1.5904
		-10	7.12416	1.75237			-10	7.12416	-1.55018
		-10	7.1344	1.73108			-10	7.1344	-1.53662
		-10	7.14464	1.67524			-10	7.14464	-1.53551
		-10	7.15488	1.6251			-10	7.15488	-1.57709
		-10	7.16512	1.57244			-10	7.16512	-1.53895
		-10	7.17536	1.50227			-10	7.17536	-1.51264
		-10	7.1856	1.41882			-10	7.1856	-1.54043
		-10	7.19584	1.35456			-10	7.19584	-1.5691
		-10	7.20608	1.31201			-10	7.20608	-1.52414
		-10	7.21632	1.20753			-10	7.21632	-1.54934
		-10	7.22656	1.10977			-10	7.22656	-1.47258
		-10	7.2368	1.13953			-10	7.2368	-1.42794
		-10	7.24704	1.11605			-10	7.24704	-1.46367
		-10	7.25728	1.03479			-10	7.25728	-1.51881
		-10	7.26752	1.01521			-10	7.26752	-1.55145
		-10	7.27776	1.07383			-10	7.27776	-1.54001
		-10	7.288	1.03765			-10	7.288	-1.44108
		-10	7.29824	0.881618			-10	7.29824	-1.37512
		-10	7.30848	0.868317			-10	7.30848	-1.48409
		-10	7.31872	0.917667			-10	7.31872	-1.57535
		-10	7.32896	0.799389			-10	7.32896	-1.53979
		-10	7.3392	0.739532			-10	7.3392	-1.52093
		-10	7.34944	0.73542			-10	7.34944	-1.44163
		-10	7.35968	0.580196			-10	7.35968	-1.35696
		-10	7.36992	0.411682			-10	7.36992	-1.28654
		-10	7.38016	0.396164			-10	7.38016	-1.29859
		-10	7.3904	0.36108			-10	7.3904	-1.36802
		-10	7.40064	0.339645			-10	7.40064	-1.2799
		-10	7.41088	0.456219			-10	7.41088	-1.19284
		-10	7.42112	0.529224			-10	7.42112	-1.11411
		-10	7.43136	0.6334			-10	7.43136	-1.09499
		-10	7.4416	0.611763			-10	7.4416	-1.06351
		-10	7.45184	0.628563			-10	7.45184	-1.08231
		-10	7.46208	0.645988			-10	7.46208	-1.15492
		-10	7.47232	0.664955			-10	7.47232	-1.26673
		-10	7.48256	0.770454			-10	7.48256	-1.31993
		-10	7.4928	0.884731			-10	7.4928	-1.34406
		-10	7.50304	0.970142			-10	7.50304	-1.37971
		-10	7.51328	1.15372			-10	7.51328	-1.31331
		-10	7.52352	1.13595			-10	7.52352	-1.24987
		-10	7.53376	1.19947			-10	7.53376	-1.19501
		-10	7.544	1.15211			-10	7.544	-1.10718
		-10	7.55424	1.10365			-10	7.55424	-1.11308
		-10	7.56448	1.08885			-10	7.56448	-1.18373
		-10	7.57472	1.12836			-10	7.57472	-1.17551
		-10	7.58496	1.12235			-10	7.58496	-1.19196
		-10	7.5952	1.12299			-10	7.5952	-1.19698
		-10	7.60544	1.06943			-10	7.60544	-1.13253
		-10	7.61568	0.977783			-10	7.61568	-1.10503
		-10	7.62592	0.92234			-10	7.62592	-1.17312
		-10	7.63616	0.962753			-10	7.63616	-1.17671
		-10	7.6464	0.934883			-10	7.6464	-1.14426
		-10	7.65664	0.951225			-10	7.65664	-1.07659
		-10	7.66688	0.98093			-10	7.66688	-1.1285
		-10	7.67712	0.961823			-10	7.67712	-1.11165
		-10	7.68736	1.08342			-10	7.68736	-1.04815
		-10	7.6976	1.00773			-10	7.6976	-1.13577
		-10	7.70784	0.895184			-10	7.70784	-1.18452
		-10	7.71808	0.882347			-10	7.71808	-1.26097
		-10	7.72832	0.955875			-10	7.72832	-1.24018
		-10	7.73856	1.00253			-10	7.73856	-1.18327
		-10	7.7488	0.920372			-10	7.7488	-1.24255
		-10	7.75904	0.930447			-10	7.75904	-1.36553
		-10	7.76928	0.962742			-10	7.76928	-1.48989
		-10	7.77952	1.01768			-10	7.77952	-1.45957
		-10	7.78976	1.07377			-10	7.78976	-1.41837
		-10	7.8	1.14986			-10	7.8	-1.28164
		-10	7.81024	1.17162			-10	7.81024	-1.14549
		-10	7.82048	1.2201			-10	7.82048	-1.07458
		-10	7.83072	1.18709			-10	7.83072	-1.11697
		-10	7.84096	1.0974			-10	7.84096	-1.12991
		-10	7.8512	1.05471			-10	7.8512	-1.02748
		-10	7.86144	1.06773			-10	7.86144	-0.969227
		-10	7.87168	1.16884			-10	7.87168	-1.06743
		-10	7.88192	1.11668			-10	7.88192	-1.19015
		-10	7.89216	1.18196			-10	7.89216	-1.16778
		-10	7.9024	1.09791			-10	7.9024	-1.12618
		-10	7.91264	1.07631			-10	7.91264	-1.05008
		-10	7.92288	1.04993			-10	7.92288	-1.0976
		-10	7.93312	0.92197			-10	7.93312	-1.24114
		-10	7.94336	0.928623			-10	7.94336	-1.33644
		-10	7.9536	0.984615			-10	7.9536	-1.35077
		-10	7.96384	1.11366			-10	7.96384	-1.36522
		-10	7.97408	1.09969			-10	7.97408	-1.45448
		-10	7.98432	0.93544			-10	7.98432	-1.5077
		-10	7.99456	0.830097			-10	7.99456	-1.51393
		-10	8.0048	0.949951			-10	8.0048	-1.57078
		-10	8.01504	1.13098			-10	8.01504	-1.65698
		-10	8.02528	1.19973			-10	8.02528	-1.63984
		-10	8.03552	1.19754			-10	8.03552	-1.47222
		-10	8.04576	1.29891			-10	8.04576	-1.50782
		-10	8.056	1.25669			-10	8.056	-1.56796
		-10	8.06624	1.16222			-10	8.06624	-1.49754
		-10	8.07648	1.05829			-10	8.07648	-1.38427
		-10	8.08672	0.969688			-10	8.08672	-1.4278
		-10	8.09696	0.977451			-10	8.09696	-1.44411
		-10	8.1072	0.92514			-10	8.1072	-1.28947
		-10	8.11744	0.809998			-10	8.11744	-1.20605
		-10	8.12768	0.798195			-10	8.12768	-1.20478
		-10	8.13792	0.845272			-10	8.13792	-1.18871
		-10	8.14816	0.780636			-10	8.14816	-1.25953
		-10	8.1584	0.819523			-10	8.1584	-1.37788
		-10	8.16864	0.762707			-10	8.16864	-1.47503
		-10	8.17888	0.780769			-10	8.17888	-1.53161
		-10	8.18912	0.833195			-10	8.18912	-1.59007
		-10	8.19936	0.997444			-10	8.19936	-1.58244
		-10	8.2096	1.21951			-10	8.2096	-1.52896
		-10	8.21984	1.24275			-10	8.21984	-1.53489
		-10	8.23008	1.16888			-10	8.23008	-1.44772
		-10	8.24032	1.20687			-10	8.24032	-1.40097
		-10	8.25056	1.23421			-10	8.25056	-1.48264
		-10	8.2608	1.1498			-10	8.2608	-1.57098
		-10	8.27104	0.949223			-10	8.27104	-1.47937
		-10	8.28128	0.857277			-10	8.28128	-1.34818
		-10	8.29152	0.774712			-10	8.29152	-1.26064
		-10	8.30176	0.70401			-10	8.30176	-1.238
		-10	8.312	0.696117			-10	8.312	-1.28612
		-10	8.32224	0.68478			-10	8.32224	-1.29271
		-10	8.33248	0.709991			-10	8.33248	-1.36533
		-10	8.34272	0.713211			-10	8.34272	-1.33416
		-10	8.35296	0.775688			-10	8.35296	-1.44646
		-10	8.3632	0.866562			-10	8.3632	-1.48429
		-10	8.37344	0.877388			-10	8.37344	-1.45589
		-10	8.38368	0.867325			-10	8.38368	-1.45365
		-10	8.39392	0.857323			-10	8.39392	-1.37664
		-10	8.40416	0.843781			-10	8.40416	-1.22524
		-10	8.4144	0.838573			-10	8.4144	-1.13413
		-10	8.42464	0.759583			-10	8.42464	-1.07158
		-10	8.43488	0.87611			-10	8.43488	-1.04439
		-10	8.44512	0.977726			-10	8.44512	-1.07106
		-10	8.45536	1.14064			-10	8.45536	-1.15711
		-10	8.4656	1.08495			-10	8.4656	-1.17261
		-10	8.47584	1.15095			-10	8.47584	-1.33019
		-10	8.48608	1.13903			-10	8.48608	-1.60308
		-10	8.49632	1.08094			-10	8.49632	-1.75366
		-10	8.50656	1.10498			-10	8.50656	-1.73536
		-10	8.5168	1.12017			-10	8.5168	-1.58497
		-10	8.52704	1.10367			-10	8.52704	-1.46422
		-10	8.53728	1.12642			-10	8.53728	-1.48158
		-10	8.54752	1.17081			-10	8.54752	-1.39458
		-10	8.55776	1.24406			-10	8.55776	-1.23889
		-10	8.568	1.37439			-10	8.568	-1.23859
		-10	8.57824	1.48141			-10	8.57824	-1.37363
		-10	8.58848	1.49376			-10	8.58848	-1.61782
		-10	8.59872	1.45696			-10	8.59872	-1.84766
		-10	8.60896	1.36158			-10	8.60896	-1.96724
		-10	8.6192	1.207			-10	8.6192	-1.95533
		-10	8.62944	1.1269			-10	8.62944	-1.88821
		-10	8.63968	1.11343			-10	8.63968	-1.82364
		-10	8.64992	1.17719			-10	8.64992	-1.7644
		-10	8.66016	1.20116			-10	8.66016	-1.69519
		-10	8.6704	1.1795			-10	8.6704	-1.70389
		-10	8.68064	1.20432			-10	8.68064	-1.69545
		-10	8.69088	1.19678			-10	8.69088	-1.62062
		-10	8.70112	1.18075			-10	8.70112	-1.53585
		-10	8.71136	1.17242			-10	8.71136	-1.57286
		-10	8.7216	1.15837			-10	8.7216	-1.61693
		-10	8.73184	1.09106			-10	8.73184	-1.57003
		-10	8.74208	1.11768			-10	8.74208	-1.45572
		-10	8.75232	1.07573			-10	8.75232	-1.40108
		-10	8.76256	1.10287			-10	8.76256	-1.33079
		-10	8.7728	1.08043			-10	8.7728	-1.32205
		-10	8.78304	1.12863			-10	8.78304	-1.47072
		-10	8.79328	1.25616			-10	8.79328	-1.57122
		-10	8.80352	1.33057			-10	8.80352	-1.54053
		-10	8.81376	1.44398			-10	8.81376	-1.5607
		-10	8.824	1.33525			-10	8.824	-1.59692
		-10	8.83424	1.23333			-10	8.83424	-1.58938
		-10	8.84448	1.21637			-10	8.84448	-1.60373
		-10	8.85472	1.25472			-10	8.85472	-1.63916
		-10	8.86496	1.26001			-10	8.86496	-1.68806
		-10	8.8752	1.08705			-10	8.8752	-1.62988
		-10	8.88544	1.10628			-10	8.88544	-1.58178
		-10	8.89568	1.17585			-10	8.89568	-1.4395
		-10	8.90592	1.15966			-10	8.90592	-1.38293
		-10	8.91616	1.19606			-10	8.91616	-1.52161
		-10	8.9264	1.16107			-10	8.9264	-1.63123
		-10	8.93664	1.09472			-10	8.93664	-1.69197
		-10	8.94688	1.05198			-10	8.94688	-1.54016
		-10	8.95712	1.02268			-10	8.95712	-1.44664
		-10	8.96736	0.986988			-10	8.96736	-1.4376
		-10	8.9776	0.891323			-10	8.9776	-1.46149
		-10	8.98784	0.82497			-10	8.98784	-1.34022
		-10	8.99808	0.679188			-10	8.99808	-1.32896
		-10	9.00832	0.745075			-10	9.00832	-1.36317
		-10	9.01856	0.805672			-10	9.01856	-1.41123
		-10	9.0288	0.832802			-10	9.0288	-1.43441
		-10	9.03904	0.879089			-10	9.03904	-1.34631
		-10	9.04928	0.948589			-10	9.04928	-1.22721
		-10	9.05952	1.10019			-10	9.05952	-1.15307
		-10	9.06976	1.13469			-10	9.06976	-1.02603
		-10	9.08	1.09364			-10	9.08	-0.940044
		-10	9.09024	1.03785			-10	9.09024	-1.0815
		-10	9.10048	1.0173			-10	9.10048	-1.21808
		-10	9.11072	1.02907			-10	9.11072	-1.36786
		-10	9.12096	0.965183			-10	9.12096	-1.38195
		-10	9.1312	0.905983			-10	9.1312	-1.40047
		-10	9.14144	0.840824			-10	9.14144	-1.46841
		-10	9.15168	0.862186			-10	9.15168	-1.5461
		-10	9.16192	0.882381			-10	9.16192	-1.54372
		-10	9.17216	0.804848			-10	9.17216	-1.45034
		-10	9.1824	0.734489			-10	9.1824	-1.48518
		-10	9.19264	0.68322			-10	9.19264	-1.55914
		-10	9.20288	0.711674			-10	9.20288	-1.61594
		-10	9.21312	0.74535			-10	9.21312	-1.56296
		-10	9.22336	0.712128			-10	9.22336	-1.39801
		-10	9.2336	0.676495			-10	9.2336	-1.3337
		-10	9.24384	0.722282			-10	9.24384	-1.33322
		-10	9.25408	0.801094			-10	9.25408	-1.33338
		-10	9.26432	0.867062			-10	9.26432	-1.43984
		-10	9.27456	0.89727			-10	9.27456	-1.50079
		-10	9.2848	0.836639			-10	9.2848	-1.48017
		-10	9.29504	0.769859			-10	9.29504	-1.44565
		-10	9.30528	0.730091			-10	9.30528	-1.45451
		-10	9.31552	0.656002			-10	9.31552	-1.38416
		-10	9.32576	0.602787			-10	9.32576	-1.30502
		-10	9.336	0.571735			-10	9.336	-1.26356
		-10	9.34624	0.561935			-10	9.34624	-1.25038
		-10	9.35648	0.629585			-10	9.35648	-1.25421
		-10	9.36672	0.652546			-10	9.36672	-1.30591
		-10	9.37696	0.699623			-10	9.37696	-1.3672
		-10	9.3872	0.659878			-10	9.3872	-1.39929
		-10	9.39744	0.65461			-10	9.39744	-1.44022
		-10	9.40768	0.546581			-10	9.40768	-1.43626
		-10	9.41792	0.532776			-10	9.41792	-1.42459
		-10	9.42816	0.507278			-10	9.42816	-1.33192
		-10	9.4384	0.441212			-10	9.4384	-1.28794
		-10	9.44864	0.277977			-10	9.44864	-1.23765
		-10	9.45888	0.153179			-10	9.45888	-1.16468
		-10	9.46912	0.141792			-10	9.46912	-1.19579
		-10	9.47936	0.198357			-10	9.47936	-1.24203
		-10	9.4896	0.372952			-10	9.4896	-1.21183
		-10	9.49984	0.338692			-10	9.49984	-1.10454
		-10	9.51008	0.317184			-10	9.51008	-1.01709
		-10	9.52032	0.177986			-10	9.52032	-0.915882
		-10	9.53056	0.170227			-10	9.53056	-0.842865
		-10	9.5408	0.324493			-10	9.5408	-0.788326
		-10	9.55104	0.363712			-10	9.55104	-0.791367
		-10	9.56128	0.386757			-10	9.56128	-0.848396
		-10	9.57152	0.306385			-10	9.57152	-0.921638
		-10	9.58176	0.300209			-10	9.58176	-0.994595
		-10	9.592	0.209278			-10	9.592	-1.05133
		-10	9.60224	0.253338			-10	9.60224	-1.08338
		-10	9.61248	0.269073			-10	9.61248	-1.05488
		-10	9.62272	0.291245			-10	9.62272	-0.983139
		-10	9.63296	0.444992			-10	9.63296	-0.990364
		-10	9.6432	0.41724			-10	9.6432	-0.989147
		-10	9.65344	0.24609			-10	9.65344	-0.93071
		-10	9.66368	0.050827			-10	9.66368	-0.895233
		-10	9.67392	-0.0688858			-10	9.67392	-0.978836
		-10	9.68416	-0.119179			-10	9.68416	-1.00413
		-10	9.6944	-0.121124			-10	9.6944	-0.944229
		-10	9.70464	-0.173145			-10	9.70464	-0.883789
		-10	9.71488	-0.126785			-10	9.71488	-0.944408
		-10	9.72512	0.0130844			-10	9.72512	-0.902958
		-10	9.73536	0.0333862			-10	9.73536	-0.973198
		-10	9.7456	0.0705299			-10	9.7456	-1.10737
		-10	9.75584	0.01511			-10	9.75584	-1.07154
		-10	9.76608	-0.0535431			-10	9.76608	-0.892242
		-10	9.77632	-0.0647583			-10	9.77632	-0.729389
		-10	9.78656	-0.0803871			-10	9.78656	-0.712856
		-10	9.7968	-0.120171			-10	9.7968	-0.821598
		-10	9.80704	-0.0120239			-10	9.80704	-0.963432
		-10	9.81728	-0.00895691			-10	9.81728	-1.12939
		-10	9.82752	0.0762863			-10	9.82752	-1.33631
		-10	9.83776	0.00966263			-10	9.83776	-1.39249
		-10	9.848	-0.060112			-10	9.848	-1.357
		-10	9.85824	-0.0279121			-10	9.85824	-1.32645
		-10	9.86848	-0.0576668			-10	9.86848	-1.28543
		-10	9.87872	-0.0776825			-10	9.87872	-1.40024
		-10	9.88896	-0.138969			-10	9.88896	-1.43188
		-10	9.8992	-0.272972			-10	9.8992	-1.45441
		-10	9.90944	-0.365345			-10	9.90944	-1.4997
		-10	9.91968	-0.431911			-10	9.91968	-1.48786
		-10	9.92992	-0.365356			-10	9.92992	-1.3558
		-10	9.94016	-0.395138			-10	9.94016	-1.24254
		-10	9.9504	-0.333805			-10	9.9504	-1.12138
		-10	9.96064	-0.210339			-10	9.96064	-0.986824
		-10	9.97088	-0.142975			-10	9.97088	-0.951168
		-10	9.98112	-0.138264			-10	9.98112	-0.9981
		-10	9.99136	-0.172787			-10	9.99136	-1.1082
		-10	10.0016	-0.205093			-10	10.0016	-1.19479
		-10	10.0118	-0.237923			-10	10.0118	-1.27035
		-10	10.0221	-0.291222			-10	10.0221	-1.3415
		-10	10.0323	-0.189167			-10	10.0323	-1.29238
		-10	10.0426	-0.0279961			-10	10.0426	-1.39952
		-10	10.0528	0.0775871			-10	10.0528	-1.41185
		-10	10.063	0.0701027			-10	10.063	-1.35696
		-10	10.0733	0.105793			-10	10.0733	-1.40767
		-10	10.0835	0.0840836			-10	10.0835	-1.46678
		-10	10.0938	0.0900345			-10	10.0938	-1.39138
		-10	10.104	0.05439			-10	10.104	-1.29131
		-10	10.1142	0.137455			-10	10.1142	-1.30487
		-10	10.1245	0.146313			-10	10.1245	-1.36845
		-10	10.1347	0.104172			-10	10.1347	-1.41314
		-10	10.145	-0.0118065			-10	10.145	-1.34223
		-10	10.1552	-0.126774			-10	10.1552	-1.28149
		-10	10.1654	-0.161022			-10	10.1654	-1.19516
		-10	10.1757	-0.153309			-10	10.1757	-1.07038
		-10	10.1859	-0.211708			-10	10.1859	-1.08115
		-10	10.1962	-0.279732			-10	10.1962	-1.03239
		-10	10.2064	-0.300186			-10	10.2064	-1.02708
		-10	10.2166	-0.32869			-10	10.2166	-0.98476
		-10	10.2269	-0.300365			-10	10.2269	-1.04692
		-10	10.2371	-0.303261			-10	10.2371	-1.15786
		-10	10.2474	-0.219852			-10	10.2474	-1.13276
		-10	10.2576	-0.10318			-10	10.2576	-1.19151
		-10	10.2678	-0.0527191			-10	10.2678	-1.27789
		-10	10.2781	-0.129753			-10	10.2781	-1.3484
		-10	10.2883	-0.142033			-10	10.2883	-1.33732
		-10	10.2986	-0.165169			-10	10.2986	-1.2887
		-10	10.3088	-0.150768			-10	10.3088	-1.33472
		-10	10.319	-0.155037			-10	10.319	-1.3033
		-10	10.3293	-0.215656			-10	10.3293	-1.35241
		-10	10.3395	-0.272064			-10	10.3395	-1.36909
		-10	10.3498	-0.156147			-10	10.3498	-1.39513
		-10	10.36	-0.0750732			-10	10.36	-1.3549
		-10	10.3702	-0.0597191			-10	10.3702	-1.25948
		-10	10.3805	-0.0642242			-10	10.3805	-1.28823
		-10	10.3907	-0.0286522			-10	10.3907	-1.3036
		-10	10.401	-0.0768852			-10	10.401	-1.3927
		-10	10.4112	-0.0782318			-10	10.4112	-1.46151
		-10	10.4214	-0.0364227			-10	10.4214	-1.40105
		-10	10.4317	0.0557022			-10	10.4317	-1.36088
		-10	10.4419	0.208874			-10	10.4419	-1.29918
		-10	10.4522	0.220245			-10	10.4522	-1.30943
		-10	10.4624	0.21183			-10	10.4624	-1.33166
		-10	10.4726	0.159328			-10	10.4726	-1.34953
		-10	10.4829	0.124748			-10	10.4829	-1.36214
		-10	10.4931	0.155861			-10	10.4931	-1.39345
		-10	10.5034	0.111229			-10	10.5034	-1.40663
		-10	10.5136	0.0502548			-10	10.5136	-1.2688
		-10	10.5238	0.032753			-10	10.5238	-1.15852
		-10	10.5341	0.167187			-10	10.5341	-1.0989
		-10	10.5443	0.241917			-10	10.5443	-1.02679
		-10	10.5546	0.272362			-10	10.5546	-1.01233
		-10	10.5648	0.191933			-10	10.5648	-1.08897
		-10	10.575	0.0774574			-10	10.575	-1.13939
		-10	10.5853	-0.00819397			-10	10.5853	-1.15497
		-10	10.5955	-0.0590134			-10	10.5955	-1.10458
		-10	10.6058	-0.0929756			-10	10.6058	-1.0508
		-10	10.616	-0.11261			-10	10.616	-1.00328
		-10	10.6262	-0.0853004			-10	10.6262	-0.972305
		-10	10.6365	-0.0399895			-10	10.6365	-0.91811
		-10	10.6467	0.0575027			-10	10.6467	-0.917919
		-10	10.657	0.0185928			-10	10.657	-0.948189
		-10	10.6672	-0.0314064			-10	10.6672	-0.814579
		-10	10.6774	-0.050251			-10	10.6774	-0.751419
		-10	10.6877	-0.0269127			-10	10.6877	-0.806366
		-10	10.6979	0.0404549			-10	10.6979	-0.803478
		-10	10.7082	0.119572			-10	10.7082	-0.740955
		-10	10.7184	0.176628			-10	10.7184	-0.803265
		-10	10.7286	0.176437			-10	10.7286	-0.850197
		-10	10.7389	0.13773			-10	10.7389	-0.882751
		-10	10.7491	0.022644			-10	10.7491	-0.90892
		-10	10.7594	-0.105984			-10	10.7594	-0.858852
		-10	10.7696	-0.166851			-10	10.7696	-0.903568
		-10	10.7798	-0.210087			-10	10.7798	-0.845596
		-10	10.7901	-0.156395			-10	10.7901	-0.894245
		-10	10.8003	-0.135834			-10	10.8003	-0.978836
		-10	10.8106	-0.124748			-10	10.8106	-1.06268
		-10	10.8208	0.0305367			-10	10.8208	-1.08632
		-10	10.831	0.0925598			-10	10.831	-1.0956
		-10	10.8413	0.148827			-10	10.8413	-1.08994
		-10	10.8515	0.0712204			-10	10.8515	-1.09157
		-10	10.8618	0.00344086			-10	10.8618	-1.07963
		-10	10.872	-0.0296783			-10	10.872	-1.05382
		-10	10.8822	-0.105743			-10	10.8822	-0.936661
		-10	10.8925	-0.0631523			-10	10.8925	-0.862129
		-10	10.9027	0.0805435			-10	10.9027	-0.916477
		-10	10.913	0.127953			-10	10.913	-0.92263
		-10	10.9232	0.215881			-10	10.9232	-0.885628
		-10	10.9334	0.261108			-10	10.9334	-0.918827
		-10	10.9437	0.117271			-10	10.9437	-1.08999
		-10	10.9539	0.0377731			-10	10.9539	-1.10493
		-10	10.9642	0.0486908			-10	10.9642	-1.20045
		-10	10.9744	0.0644264			-10	10.9744	-1.13742
		-10	10.9846	0.0672646			-10	10.9846	-1.21712
		-10	10.9949	0.0721512			-10	10.9949	-1.27786
		-10	11.0051	0.05756			-10	11.0051	-1.35009
		-10	11.0154	0.109093			-10	11.0154	-1.40408
		-10	11.0256	0.1828			-10	11.0256	-1.44002
		-10	11.0358	0.247509			-10	11.0358	-1.4755
		-10	11.0461	0.143547			-10	11.0461	-1.43
		-10	11.0563	0.0419426			-10	11.0563	-1.41345
		-10	11.0666	-0.103096			-10	11.0666	-1.32658
		-10	11.0768	-0.186592			-10	11.0768	-1.30958
		-10	11.087	-0.116928			-10	11.087	-1.23064
		-10	11.0973	0.0377731			-10	11.0973	-1.19953
		-10	11.1075	0.150936			-10	11.1075	-1.31736
		-10	11.1178	0.0814629			-10	11.1178	-1.27297
		-10	11.128	0.0553436			-10	11.128	-1.26696
		-10	11.1382	0.0330391			-10	11.1382	-1.29236
		-10	11.1485	0.0487976			-10	11.1485	-1.21743
		-10	11.1587	-0.0371017			-10	11.1587	-1.09235
		-10	11.169	-0.154976			-10	11.169	-1.006
		-10	11.1792	-0.201469			-10	11.1792	-1.03587
		-10	11.1894	-0.166447			-10	11.1894	-0.988434
		-10	11.1997	-0.134056			-10	11.1997	-1.05934
		-10	11.2099	-0.0717468			-10	11.2099	-1.1254
		-10	11.2202	-0.0369606			-10	11.2202	-1.23257
		-10	11.2304	0.0275421			-10	11.2304	-1.30256
		-10	11.2406	-0.00868225			-10	11.2406	-1.25891
		-10	11.2509	0.017601			-10	11.2509	-1.23661
		-10	11.2611	-0.0371857			-10	11.2611	-1.24
		-10	11.2714	-0.114136			-10	11.2714	-1.16245
		-10	11.2816	-0.0894356			-10	11.2816	-0.98761
		-10	11.2918	-0.125294			-10	11.2918	-0.826225
		-10	11.3021	-0.209908			-10	11.3021	-0.802372
		-10	11.3123	-0.192719			-10	11.3123	-0.881336
		-10	11.3226	-0.156326			-10	11.3226	-0.888382
		-10	11.3328	-0.122864			-10	11.3328	-0.940701
		-10	11.343	-0.103897			-10	11.343	-1.09114
		-10	11.3533	-0.0806046			-10	11.3533	-1.09164
		-10	11.3635	-0.0471764			-10	11.3635	-1.05524
		-10	11.3738	0.00181961			-10	11.3738	-1.00961
		-10	11.384	-0.00228119			-10	11.384	-1.0441
		-10	11.3942	-0.0485954			-10	11.3942	-1.08474
		-10	11.4045	-0.0641174			-10	11.4045	-1.10587
		-10	11.4147	-0.11137			-10	11.4147	-1.0823
		-10	11.425	-0.216774			-10	11.425	-1.11565
		-10	11.4352	-0.318054			-10	11.4352	-1.20374
		-10	11.4454	-0.370102			-10	11.4454	-1.22005
		-10	11.4557	-0.335304			-10	11.4557	-1.15956
		-10	11.4659	-0.247555			-10	11.4659	-1.26332
		-10	11.4762	-0.244385			-10	11.4762	-1.29299
		-10	11.4864	-0.297409			-10	11.4864	-1.19648
		-10	11.4966	-0.278397			-10	11.4966	-1.13438
		-10	11.5069	-0.25721			-10	11.5069	-1.00109
		-10	11.5171	-0.329262			-10	11.5171	-0.941666
		-10	11.5274	-0.366287			-10	11.5274	-0.945576
		-10	11.5376	-0.428074			-10	11.5376	-0.920578
		-10	11.5478	-0.42717			-10	11.5478	-0.839565
		-10	11.5581	-0.361641			-10	11.5581	-0.800785
		-10	11.5683	-0.347275			-10	11.5683	-0.893219
		-10	11.5786	-0.459579			-10	11.5786	-0.943024
		-10	11.5888	-0.496513			-10	11.5888	-0.893459
		-10	11.599	-0.479584			-10	11.599	-0.97316
		-10	11.6093	-0.510841			-10	11.6093	-0.948174
		-10	11.6195	-0.513428			-10	11.6195	-1.00963
		-10	11.6298	-0.407452			-10	11.6298	-1.03842
		-10	11.64	-0.328224			-10	11.64	-1.02454
		-10	11.6502	-0.331978			-10	11.6502	-0.949688
		-10	11.6605	-0.216621			-10	11.6605	-0.976238
		-10	11.6707	0.0019722			-10	11.6707	-1.05231
		-10	11.681	0.041275			-10	11.681	-1.19183
		-10	11.6912	-0.0329895			-10	11.6912	-1.23044
		-10	11.7014	-0.0636024			-10	11.7014	-1.29828
		-10	11.7117	-0.136871			-10	11.7117	-1.33887
		-10	11.7219	-0.191349			-10	11.7219	-1.24256
		-10	11.7322	-0.257427			-10	11.7322	-1.21426
		-10	11.7424	-0.335949			-10	11.7424	-1.20542
		-10	11.7526	-0.368244			-10	11.7526	-1.17187
		-10	11.7629	-0.409286			-10	11.7629	-1.07637
		-10	11.7731	-0.400658			-10	11.7731	-1.11304
		-10	11.7834	-0.463875			-10	11.7834	-1.16107
		-10	11.7936	-0.493855			-10	11.7936	-1.14058
		-10	11.8038	-0.534065			-10	11.8038	-1.17443
		-10	11.8141	-0.552483			-10	11.8141	-1.2065
		-10	11.8243	-0.570339			-10	11.8243	-1.30758
		-10	11.8346	-0.54311			-10	11.8346	-1.35236
		-10	11.8448	-0.527973			-10	11.8448	-1.34762
		-10	11.855	-0.501244			-10	11.855	-1.23683
		-10	11.8653	-0.454922			-10	11.8653	-1.04997
		-10	11.8755	-0.402206			-10	11.8755	-1.05045
		-10	11.8858	-0.330631			-10	11.8858	-1.18855
		-10	11.896	-0.294323			-10	11.896	-1.39293
		-10	11.9062	-0.324505			-10	11.9062	-1.50042
		-10	11.9165	-0.330933			-10	11.9165	-1.49773
		-10	11.9267	-0.36586			-10	11.9267	-1.57975
		-10	11.937	-0.352592			-10	11.937	-1.65565
		-10	11.9472	-0.269226			-10	11.9472	-1.46349
		-10	11.9574	-0.289173			-10	11.9574	-1.33187
		-10	11.9677	-0.15102			-10	11.9677	-1.34435
		-10	11.9779	-0.122803			-10	11.9779	-1.3887
		-10	11.9882	-0.100143			-10	11.9882	-1.32671
		-10	11.9984	-0.121899			-10	11.9984	-1.27424
		-10	12.0086	-0.0905228			-10	12.0086	-1.1832
		-10	12.0189	-0.037674			-10	12.0189	-1.13545
		-10	12.0291	-0.134094			-10	12.0291	-1.11817
		-10	12.0394	-0.254639			-10	12.0394	-1.11411
		-10	12.0496	-0.19416			-10	12.0496	-1.18563
		-10	12.0598	-0.151497			-10	12.0598	-1.27713
		-10	12.0701	-0.232498			-10	12.0701	-1.39744
		-10	12.0803	-0.0974121			-10	12.0803	-1.38078
		-10	12.0906	-0.0209389			-10	12.0906	-1.35648
		-10	12.1008	-0.0120239			-10	12.1008	-1.29161
		-10	12.111	-0.0483322			-10	12.111	-1.29591
		-10	12.1213	0.0282936			-10	12.1213	-1.31443
		-10	12.1315	0.0465088			-10	12.1315	-1.2792
		-10	12.1418	-0.0978889			-10	12.1418	-1.271
		-10	12.152	-0.16431			-10	12.152	-1.22042
		-10	12.1622	-0.210552			-10	12.1622	-1.15469
		-10	12.1725	-0.238136			-10	12.1725	-1.16907
		-10	12.1827	-0.172382			-10	12.1827	-1.16479
		-10	12.193	-0.00753784			-10	12.193	-1.19155
		-10	12.2032	0.0703888			-10	12.2032	-1.11934
		-10	12.2134	0.175304			-10	12.2134	-0.964115
		-10	12.2237	0.162083			-10	12.2237	-0.898705
		-10	12.2339	0.0899849			-10	12.2339	-0.937874
		-10	12.2442	0.126308			-10	12.2442	-1.01095
		-10	12.2544	0.211426			-10	12.2544	-1.09103
		-10	12.2646	0.189548			-10	12.2646	-1.12649
		-10	12.2749	0.133377			-10	12.2749	-1.13952
		-10	12.2851	0.215118			-10	12.2851	-1.03509
		-10	12.2954	0.258739			-10	12.2954	-0.90147
		-10	12.3056	0.286217			-10	12.3056	-1.02692
		-10	12.3158	0.284977			-10	12.3158	-1.21996
		-10	12.3261	0.373203			-10	12.3261	-1.31697
		-10	12.3363	0.374287			-10	12.3363	-1.36662
		-10	12.3466	0.423927			-10	12.3466	-1.32012
		-10	12.3568	0.489468			-10	12.3568	-1.28641
		-10	12.367	0.447472			-10	12.367	-1.2559
		-10	12.3773	0.361244			-10	12.3773	-1.20531
		-10	12.3875	0.327808			-10	12.3875	-1.13317
		-10	12.3978	0.348549			-10	12.3978	-1.10548
		-10	12.408	0.492542			-10	12.408	-1.07137
		-10	12.4182	0.464195			-10	12.4182	-1.08186
		-10	12.4285	0.366562			-10	12.4285	-1.08895
		-10	12.4387	0.344223			-10	12.4387	-1.06203
		-10	12.449	0.357098			-10	12.449	-0.980099
		-10	12.4592	0.347263			-10	12.4592	-0.9258
		-10	12.4694	0.310799			-10	12.4694	-0.926407
		-10	12.4797	0.399357			-10	12.4797	-0.868065
		-10	12.4899	0.46764			-10	12.4899	-0.86684
		-10	12.5002	0.485115			-10	12.5002	-0.837872
		-10	12.5104	0.489731			-10	12.5104	-0.852188
		-10	12.5206	0.593441			-10	12.5206	-0.991817
		-10	12.5309	0.660713			-10	12.5309	-0.997231
		-10	12.5411	0.615437			-10	12.5411	-0.866291
		-10	12.5514	0.550907			-10	12.5514	-0.745331
		-10	12.5616	0.452381			-10	12.5616	-0.776287
		-10	12.5718	0.354237			-10	12.5718	-0.785145
		-10	12.5821	0.349518			-10	12.5821	-0.878975
		-10	12.5923	0.505238			-10	12.5923	-0.936577
		-10	12.6026	0.514992			-10	12.6026	-0.922951
		-10	12.6128	0.555248			-10	12.6128	-0.990723
		-10	12.623	0.639446			-10	12.623	-1.03826
		-10	12.6333	0.607079			-10	12.6333	-0.985546
		-10	12.6435	0.546402			-10	12.6435	-0.974163
		-10	12.6538	0.614185			-10	12.6538	-1.00785
		-10	12.664	0.623936			-10	12.664	-1.00137
		-10	12.6742	0.707573			-10	12.6742	-1.17476
		-10	12.6845	0.78159			-10	12.6845	-1.20206
		-10	12.6947	0.953217			-10	12.6947	-1.20668
		-10	12.705	1.05767			-10	12.705	-1.17599
		-10	12.7152	1.03315			-10	12.7152	-1.26748
		-10	12.7254	1.03706			-10	12.7254	-1.29594
		-10	12.7357	1.0816			-10	12.7357	-1.34028
		-10	12.7459	1.15804			-10	12.7459	-1.17392
		-10	12.7562	1.05013			-10	12.7562	-1.12905
		-10	12.7664	0.933296			-10	12.7664	-1.04174
		-10	12.7766	0.903004			-10	12.7766	-0.980732
		-10	12.7869	0.847225			-10	12.7869	-0.929173
		-10	12.7971	0.907116			-10	12.7971	-0.81757
		-10	12.8074	0.977116			-10	12.8074	-0.761196
		-10	12.8176	0.991447			-10	12.8176	-0.739582
		-10	12.8278	0.982349			-10	12.8278	-0.767788
		-10	12.8381	0.980789			-10	12.8381	-0.743553
		-10	12.8483	1.05914			-10	12.8483	-0.769768
		-10	12.8586	1.08368			-10	12.8586	-0.690922
		-10	12.8688	1.04919			-10	12.8688	-0.608608
		-10	12.879	1.0088			-10	12.879	-0.656685
		-10	12.8893	0.925549			-10	12.8893	-0.608967
		-10	12.8995	0.820953			-10	12.8995	-0.524673
		-10	12.9098	0.798615			-10	12.9098	-0.539215
		-10	12.92	0.826103			-10	12.92	-0.595268
		-10	12.9302	0.833015			-10	12.9302	-0.584946
		-10	12.9405	0.845985			-10	12.9405	-0.55687
		-10	12.9507	0.831467			-10	12.9507	-0.578735
		-10	12.961	0.945419			-10	12.961	-0.547657
		-10	12.9712	1.00156			-10	12.9712	-0.42337
		-10	12.9814	0.971405			-10	12.9814	-0.33997
		-10	12.9917	0.963505			-10	12.9917	-0.333294
		-10	13.0019	0.965244			-10	13.0019	-0.357265
		-10	13.0122	0.967854			-10	13.0122	-0.349365
		-10	13.0224	0.903923			-10	13.0224	-0.29591
		-10	13.0326	0.825603			-10	13.0326	0.165932
		-10	13.0429	0.843746			-10	13.0429	0.362732
		-10	13.0531	0.901909			-10	13.0531	0.28923
		-10	13.0634	0.913269			-10	13.0634	0.0803986
		-10	13.0736	0.920494			-10	13.0736	-0.224171
		-10	13.0838	0.964157			-10	13.0838	-0.37907
		-10	13.0941	0.98819			-10	13.0941	-0.456402
		-10	13.1043	0.957806			-10	13.1043	-0.415966
		-10	13.1146	1.08648			-10	13.1146	-0.441391
		-10	13.1248	1.13091			-10	13.1248	-0.369892
		-10	13.135	1.09143			-10	13.135	-0.271759
		-10	13.1453	1.07717			-10	13.1453	-0.252422
		-10	13.1555	1.08109			-10	13.1555	-0.24559
		-10	13.1658	1.04886			-10	13.1658	-0.0845871
		-10	13.176	1.10282			-10	13.176	-0.0997505
		-10	13.1862	1.06173			-10	13.1862	-0.205429
		-10	13.1965	1.07983			-10	13.1965	-0.290306
		-10	13.2067	1.12894			-10	13.2067	-0.366341
		-10	13.217	1.2217			-10	13.217	-0.466843
		-10	13.2272	1.15324			-10	13.2272	-0.555679
		-10	13.2374	1.03051			-10	13.2374	-0.577042
		-10	13.2477	0.989254			-10	13.2477	-0.538857
		-10	13.2579	0.91172			-10	13.2579	-0.612373
		-10	13.2682	0.887245			-10	13.2682	-0.643417
		-10	13.2784	0.806683			-10	13.2784	-0.663956
		-10	13.2886	0.778419			-10	13.2886	-0.662823
		-10	13.2989	0.646454			-10	13.2989	-0.656673
		-10	13.3091	0.656776			-10	13.3091	-0.652153
		-10	13.3194	0.774639			-10	13.3194	-0.644691
		-10	13.3296	1.02064			-10	13.3296	-0.593395
		-10	13.3398	1.02528			-10	13.3398	-0.532707
		-10	13.3501	0.995129			-10	13.3501	-0.466331
		-10	13.3603	0.991566			-10	13.3603	-0.458237
		-10	13.3706	1.06005			-10	13.3706	-0.458012
		-10	13.3808	1.0855			-10	13.3808	-0.455914
		-10	13.391	1.10028			-10	13.391	-0.550232
		-10	13.4013	1.11209			-10	13.4013	-0.747093
		-10	13.4115	1.0402			-10	13.4115	-0.779732
		-10	13.4218	0.970394			-10	13.4218	-0.716339
		-10	13.432	0.857155			-10	13.432	-0.603325
		-10	13.4422	0.758617			-10	13.4422	-0.521858
		-10	13.4525	0.805847			-10	13.4525	-0.466759
		-10	13.4627	0.864582			-10	13.4627	-0.434204
		-10	13.473	0.895542			-10	13.473	-0.445721
		-10	13.4832	0.870163			-10	13.4832	-0.503929
		-10	13.4934	0.876709			-10	13.4934	-0.543354
		-10	13.5037	0.768929			-10	13.5037	-0.590954
		-10	13.5139	0.718254			-10	13.5139	-0.563667
		-10	13.5242	0.754566			-10	13.5242	-0.600311
		-10	13.5344	0.749344			-10	13.5344	-0.528976
		-10	13.5446	0.630779			-10	13.5446	-0.392197
		-10	13.5549	0.551136			-10	13.5549	-0.328312
		-10	13.5651	0.586899			-10	13.5651	-0.27103
		-10	13.5754	0.664967			-10	13.5754	-0.301788
		-10	13.5856	0.702805			-10	13.5856	-0.403389
		-10	13.5958	0.75782			-10	13.5958	-0.496063
		-10	13.6061	0.859898			-10	13.6061	-0.549419
		-10	13.6163	0.864357			-10	13.6163	-0.606476
		-10	13.6266	0.752609			-10	13.6266	-0.612911
		-10	13.6368	0.692623			-10	13.6368	-0.607403
		-10	13.647	0.726349			-10	13.647	-0.515778
		-10	13.6573	0.652962			-10	13.6573	-0.488098
		-10	13.6675	0.534397			-10	13.6675	-0.476856
		-10	13.6778	0.588852			-10	13.6778	-0.365288
		-10	13.688	0.719685			-10	13.688	-0.301632
		-10	13.6982	0.697762			-10	13.6982	-0.259266
		-10	13.7085	0.686546			-10	13.7085	-0.186569
		-10	13.7187	0.769394			-10	13.7187	-0.275703
		-10	13.729	0.874584			-10	13.729	-0.340984
		-10	13.7392	0.865288			-10	13.7392	-0.399147
		-10	13.7494	0.912708			-10	13.7494	-0.418816
		-10	13.7597	0.93425			-10	13.7597	-0.484821
		-10	13.7699	0.942345			-10	13.7699	-0.538643
		-10	13.7802	0.908653			-10	13.7802	-0.626835
		-10	13.7904	0.889332			-10	13.7904	-0.557266
		-10	13.8006	0.888031			-10	13.8006	-0.449715
		-10	13.8109	0.857727			-10	13.8109	-0.29858
		-10	13.8211	0.746258			-10	13.8211	-0.272606
		-10	13.8314	0.661774			-10	13.8314	-0.202843
		-10	13.8416	0.720566			-10	13.8416	-0.20052
		-10	13.8518	0.807732			-10	13.8518	-0.202999
		-10	13.8621	1.18705			-10	13.8621	-0.267349
		-10	13.8723	1.58818			-10	13.8723	-0.400135
		-10	13.8826	1.52001			-10	13.8826	-0.465176
		-10	13.8928	1.409			-10	13.8928	-0.498066
		-10	13.903	1.20263			-10	13.903	-0.649521
		-10	13.9133	1.10941			-10	13.9133	-0.832222
		-10	13.9235	0.860687			-10	13.9235	-0.884007
		-10	13.9338	0.699837			-10	13.9338	-0.814148
		-10	13.944	0.687485			-10	13.944	-0.621029
		-10	13.9542	0.686581			-10	13.9542	-0.591145
		-10	13.9645	0.644367			-10	13.9645	-0.630043
		-10	13.9747	0.548904			-10	13.9747	-0.653061
		-10	13.985	0.566788			-10	13.985	-0.555321
		-10	13.9952	0.471298			-10	13.9952	-0.536949
		-10	14.0054	0.358051			-10	14.0054	-0.564762
		-10	14.0157	0.321514			-10	14.0157	-0.578613
		-10	14.0259	0.33445			-10	14.0259	-0.602993
		-10	14.0362	0.320358			-10	14.0362	-0.628326
		-10	14.0464	0.276558			-10	14.0464	-0.628944
		-10	14.0566	0.267036			-10	14.0566	-0.536068
		-10	14.0669	0.330395			-10	14.0669	-0.447449
		-10	14.0771	0.421196			-10	14.0771	-0.428341
		-10	14.0874	0.429291			-10	14.0874	-0.441429
		-10	14.0976	0.408882			-10	14.0976	-0.508556
		-10	14.1078	0.472027			-10	14.1078	-0.560722
		-10	14.1181	0.521786			-10	14.1181	-0.490257
		-10	14.1283	0.50325			-10	14.1283	-0.392517
		-10	14.1386	0.476105			-10	14.1386	-0.184582
		-10	14.1488	0.483757			-10	14.1488	-0.138397
		-10	14.159	0.483292			-10	14.159	-0.235947
		-10	14.1693	0.514229			-10	14.1693	-0.430653
		-10	14.1795	0.484509			-10	14.1795	-0.563427
		-10	14.1898	0.50909			-10	14.1898	-0.627895
		-10	14.2	0.509007			-10	14.2	-0.459991
		-10	14.2102	0.585873			-10	14.2102	-0.446232
		-10	14.2205	0.669235			-10	14.2205	-0.554462
		-10	14.2307	0.728004			-10	14.2307	-0.53825
		-10	14.241	0.778419			-10	14.241	-0.36882
		-10	14.2512	0.655861			-10	14.2512	-0.391457
		-10	14.2614	0.585968			-10	14.2614	-0.456818
		-10	14.2717	0.505047			-10	14.2717	-0.459621
		-10	14.2819	0.476437			-10	14.2819	-0.459919
		-10	14.2922	0.389786			-10	14.2922	-0.420948
		-10	14.3024	0.393719			-10	14.3024	-0.473759
		-10	14.3126	0.494118			-10	14.3126	-0.543518
		-10	14.3229	0.597782			-10	14.3229	-0.51461
		-10	14.3331	0.670952			-10	14.3331	-0.599346
		-10	14.3434	0.638729			-10	14.3434	-0.666805
		-10	14.3536	0.826962			-10	14.3536	-0.67601
		-10	14.3638	0.967342			-10	14.3638	-0.699348
		-10	14.3741	0.920006			-10	14.3741	-0.747047
		-10	14.3843	0.739986			-10	14.3843	-0.821934
		-10	14.3946	0.679489			-10	14.3946	-0.919922
		-10	14.4048	0.53981			-10	14.4048	-1.05328
		-10	14.415	0.439461			-10	14.415	-1.10749
		-10	14.4253	0.42997			-10	14.4253	-1.02816
		-10	14.4355	0.448601			-10	14.4355	-0.922188
		-10	14.4458	0.342804			-10	14.4458	-0.927017
		-10	14.456	0.383419			-10	14.456	-0.986633
		-10	14.4662	0.416451			-10	14.4662	-1.03754
		-10	14.4765	0.44318			-10	14.4765	-0.991402
		-10	14.4867	0.466259			-10	14.4867	-1.01239
		-10	14.497	0.508289			-10	14.497	-1.06929
		-10	14.5072	0.554771			-10	14.5072	-1.18061
		-10	14.5174	0.551407			-10	14.5174	-1.15802
		-10	14.5277	0.563557			-10	14.5277	-1.13794
		-10	14.5379	0.643139			-10	14.5379	-1.05999
		-10	14.5482	0.752823			-10	14.5482	-0.985558
		-10	14.5584	0.78265			-10	14.5584	-1.07584
		-10	14.5686	0.669189			-10	14.5686	-1.1358
		-10	14.5789	0.513596			-10	14.5789	-1.16279
		-10	14.5891	0.396709			-10	14.5891	-1.1438
		-10	14.5994	0.259392			-10	14.5994	-1.15363
		-10	14.6096	0.275513			-10	14.6096	-1.17628
		-10	14.6198	0.293846			-10	14.6198	-1.18656
		-10	14.6301	0.241272			-10	14.6301	-1.12466
		-10	14.6403	0.211327			-10	14.6403	-1.21104
		-10	14.6506	0.297672			-10	14.6506	-1.21772
		-10	14.6608	0.351173			-10	14.6608	-1.2544
		-10	14.671	0.358612			-10	14.671	-1.39486
		-10	14.6813	0.489552			-10	14.6813	-1.46598
		-10	14.6915	0.620419			-10	14.6915	-1.34665
		-10	14.7018	0.621994			-10	14.7018	-1.33162
		-10	14.712	0.64859			-10	14.712	-1.39628
		-10	14.7222	0.720509			-10	14.7222	-1.36927
		-10	14.7325	0.69043			-10	14.7325	-1.36121
		-10	14.7427	0.635033			-10	14.7427	-1.3602
		-10	14.753	0.618546			-10	14.753	-1.36101
		-10	14.7632	0.531906			-10	14.7632	-1.34367
		-10	14.7734	0.400097			-10	14.7734	-1.30158
		-10	14.7837	0.373741			-10	14.7837	-1.25347
		-10	14.7939	0.287704			-10	14.7939	-1.26487
		-10	14.8042	0.188774			-10	14.8042	-1.32367
		-10	14.8144	0.237175			-10	14.8144	-1.35242
		-10	14.8246	0.239128			-10	14.8246	-1.387
		-10	14.8349	0.233776			-10	14.8349	-1.39759
		-10	14.8451	0.168484			-10	14.8451	-1.26503
		-10	14.8554	0.187893			-10	14.8554	-1.11453
		-10	14.8656	0.148125			-10	14.8656	-1.01606
		-10	14.8758	0.170845			-10	14.8758	-0.975368
		-10	14.8861	0.245232			-10	14.8861	-0.995872
		-10	14.8963	0.248508			-10	14.8963	-1.01789
		-10	14.9066	0.2953			-10	14.9066	-1.15327
		-10	14.9168	0.36002			-10	14.9168	-1.2696
		-10	14.927	0.406902			-10	14.927	-1.45038
		-10	14.9373	0.29126			-10	14.9373	-1.49679
		-10	14.9475	0.355225			-10	14.9475	-1.52212
		-10	14.9578	0.420708			-10	14.9578	-1.5441
		-10	14.968	0.277321			-10	14.968	-1.60035
		-10	14.9782	0.176411			-10	14.9782	-1.62333
		-10	14.9885	0.132698			-10	14.9885	-1.68991
		-10	14.9987	0.276428			-10	14.9987	-1.76791
		-10	3.00768	0.688347			-10	3.00768	-2.48534
		-10	3.01792	0.6828			-10	3.01792	-2.45993
		-10	3.02816	0.716145			-10	3.02816	-2.44481
		-10	3.0384	0.697868			-10	3.0384	-2.4229
		-10	3.04864	0.715431			-10	3.04864	-2.39798
		-10	3.05888	0.65028			-10	3.05888	-2.46793
		-10	3.06912	0.728508			-10	3.06912	-2.54267
		-10	3.07936	0.733261			-10	3.07936	-2.55964
		-10	3.0896	0.616558			-10	3.0896	-2.51981
		-10	3.09984	0.63488			-10	3.09984	-2.53622
		-10	3.11008	0.771778			-10	3.11008	-2.59546
		-10	3.12032	0.733334			-10	3.12032	-2.67025
		-10	3.13056	0.861343			-10	3.13056	-2.69596
		-10	3.1408	0.922661			-10	3.1408	-2.76031
		-10	3.15104	0.902897			-10	3.15104	-2.7922
		-10	3.16128	0.794716			-10	3.16128	-2.83439
		-10	3.17152	0.802608			-10	3.17152	-2.82808
		-10	3.18176	0.790997			-10	3.18176	-3.01753
		-10	3.192	0.762146			-10	3.192	-2.9916
		-10	3.20224	0.589626			-10	3.20224	-2.96015
		-10	3.21248	0.519928			-10	3.21248	-2.86392
		-10	3.22272	0.566811			-10	3.22272	-2.83569
		-10	3.23296	0.529785			-10	3.23296	-2.66617
		-10	3.2432	0.582142			-10	3.2432	-2.52781
		-10	3.25344	0.716095			-10	3.25344	-2.51826
		-10	3.26368	0.722691			-10	3.26368	-2.53836
		-10	3.27392	0.611992			-10	3.27392	-2.55451
		-10	3.28416	0.57412			-10	3.28416	-2.53402
		-10	3.2944	0.592896			-10	3.2944	-2.59235
		-10	3.30464	0.729939			-10	3.30464	-2.46595
		-10	3.31488	0.610191			-10	3.31488	-2.3992
		-10	3.32512	0.473648			-10	3.32512	-2.48635
		-10	3.33536	0.494179			-10	3.33536	-2.52402
		-10	3.3456	0.579639			-10	3.3456	-2.47387
		-10	3.35584	0.794262			-10	3.35584	-2.43246
		-10	3.36608	0.860424			-10	3.36608	-2.38875
		-10	3.37632	0.812405			-10	3.37632	-2.51975
		-10	3.38656	0.755127			-10	3.38656	-2.57587
		-10	3.3968	0.692303			-10	3.3968	-2.52925
		-10	3.40704	0.657936			-10	3.40704	-2.42985
		-10	3.41728	0.623497			-10	3.41728	-2.38408
		-10	3.42752	0.625092			-10	3.42752	-2.35979
		-10	3.43776	0.588413			-10	3.43776	-2.18358
		-10	3.448	0.568348			-10	3.448	-2.01637
		-10	3.45824	0.493225			-10	3.45824	-2.07354
		-10	3.46848	0.534706			-10	3.46848	-2.17771
		-10	3.47872	0.578732			-10	3.47872	-2.17074
		-10	3.48896	0.567551			-10	3.48896	-2.19015
		-10	3.4992	0.500912			-10	3.4992	-2.23579
		-10	3.50944	0.412079			-10	3.50944	-2.23016
		-10	3.51968	0.380962			-10	3.51968	-2.32136
		-10	3.52992	0.4147			-10	3.52992	-2.19511
		-10	3.54016	0.469036			-10	3.54016	-2.1368
		-10	3.5504	0.580151			-10	3.5504	-2.17902
		-10	3.56064	0.553852			-10	3.56064	-2.24689
		-10	3.57088	0.564392			-10	3.57088	-2.21431
		-10	3.58112	0.589317			-10	3.58112	-2.19318
		-10	3.59136	0.714058			-10	3.59136	-2.13085
		-10	3.6016	0.739162			-10	3.6016	-2.14289
		-10	3.61184	0.72599			-10	3.61184	-2.15075
		-10	3.62208	0.719543			-10	3.62208	-2.22059
		-10	3.63232	0.634796			-10	3.63232	-2.20996
		-10	3.64256	0.595482			-10	3.64256	-2.11362
		-10	3.6528	0.528236			-10	3.6528	-2.109
		-10	3.66304	0.442284			-10	3.66304	-2.19866
		-10	3.67328	0.312881			-10	3.67328	-2.3362
		-10	3.68352	0.28413			-10	3.68352	-2.3921
		-10	3.69376	0.380035			-10	3.69376	-2.36571
		-10	3.704	0.446396			-10	3.704	-2.41832
		-10	3.71424	0.54464			-10	3.71424	-2.42972
		-10	3.72448	0.512177			-10	3.72448	-2.32041
		-10	3.73472	0.4842			-10	3.73472	-2.25423
		-10	3.74496	0.454243			-10	3.74496	-2.24396
		-10	3.7552	0.387138			-10	3.7552	-2.19338
		-10	3.76544	0.342434			-10	3.76544	-2.11881
		-10	3.77568	0.416534			-10	3.77568	-2.05879
		-10	3.78592	0.451309			-10	3.78592	-2.04426
		-10	3.79616	0.455124			-10	3.79616	-2.1409
		-10	3.8064	0.341064			-10	3.8064	-2.08789
		-10	3.81664	0.356133			-10	3.81664	-2.13166
		-10	3.82688	0.446636			-10	3.82688	-2.02323
		-10	3.83712	0.44487			-10	3.83712	-2.06928
		-10	3.84736	0.433334			-10	3.84736	-2.19559
		-10	3.8576	0.422604			-10	3.8576	-2.24955
		-10	3.86784	0.594585			-10	3.86784	-2.31864
		-10	3.87808	0.661819			-10	3.87808	-2.27303
		-10	3.88832	0.784248			-10	3.88832	-2.15228
		-10	3.89856	0.731438			-10	3.89856	-2.04311
		-10	3.9088	0.598377			-10	3.9088	-2.02462
		-10	3.91904	0.609463			-10	3.91904	-1.99091
		-10	3.92928	0.775082			-10	3.92928	-1.9974
		-10	3.93952	0.936325			-10	3.93952	-1.94838
		-10	3.94976	0.898975			-10	3.94976	-1.87793
		-10	3.96	0.825542			-10	3.96	-1.75533
		-10	3.97024	0.71946			-10	3.97024	-1.77871
		-10	3.98048	0.830872			-10	3.98048	-1.87945
		-10	3.99072	0.886005			-10	3.99072	-1.89021
		-10	4.00096	0.873119			-10	4.00096	-1.99545
		-10	4.0112	1.01945			-10	4.0112	-1.97361
		-10	4.02144	1.10213			-10	4.02144	-1.95649
		-10	4.03168	1.11465			-10	4.03168	-1.9257
		-10	4.04192	1.02429			-10	4.04192	-2.00202
		-10	4.05216	0.996666			-10	4.05216	-2.10777
		-10	4.0624	0.84874			-10	4.0624	-2.11221
		-10	4.07264	0.737103			-10	4.07264	-2.0877
		-10	4.08288	0.697609			-10	4.08288	-2.08767
		-10	4.09312	0.72971			-10	4.09312	-2.11597
		-10	4.10336	0.81826			-10	4.10336	-2.187
		-10	4.1136	1.02176			-10	4.1136	-2.19281
		-10	4.12384	1.20632			-10	4.12384	-2.11604
		-10	4.13408	1.14235			-10	4.13408	-2.03192
		-10	4.14432	1.15003			-10	4.14432	-1.96453
		-10	4.15456	1.10528			-10	4.15456	-1.95706
		-10	4.1648	1.05833			-10	4.1648	-1.95539
		-10	4.17504	1.03568			-10	4.17504	-1.86156
		-10	4.18528	0.996441			-10	4.18528	-1.70499
		-10	4.19552	0.970169			-10	4.19552	-1.63358
		-10	4.20576	0.971252			-10	4.20576	-1.64929
		-10	4.216	0.991245			-10	4.216	-1.71187
		-10	4.22624	1.05971			-10	4.22624	-1.61723
		-10	4.23648	1.06358			-10	4.23648	-1.56242
		-10	4.24672	1.05782			-10	4.24672	-1.54059
		-10	4.25696	1.01458			-10	4.25696	-1.476
		-10	4.2672	0.915401			-10	4.2672	-1.46003
		-10	4.27744	0.745388			-10	4.27744	-1.53141
		-10	4.28768	0.634819			-10	4.28768	-1.49223
		-10	4.29792	0.588615			-10	4.29792	-1.44391
		-10	4.30816	0.59367			-10	4.30816	-1.43846
		-10	4.3184	0.637062			-10	4.3184	-1.32149
		-10	4.32864	0.688034			-10	4.32864	-1.28225
		-10	4.33888	0.747784			-10	4.33888	-1.26201
		-10	4.34912	0.813026			-10	4.34912	-1.22696
		-10	4.35936	0.754112			-10	4.35936	-1.16161
		-10	4.3696	0.691315			-10	4.3696	-1.08584
		-10	4.37984	0.669319			-10	4.37984	-1.02783
		-10	4.39008	0.610191			-10	4.39008	-1.07821
		-10	4.40032	0.519676			-10	4.40032	-1.17074
		-10	4.41056	0.436886			-10	4.41056	-1.10629
		-10	4.4208	0.371975			-10	4.4208	-1.02094
		-10	4.43104	0.318535			-10	4.43104	-0.980316
		-10	4.44128	0.390678			-10	4.44128	-1.04172
		-10	4.45152	0.561649			-10	4.45152	-1.07242
		-10	4.46176	0.656395			-10	4.46176	-1.18922
		-10	4.472	0.644238			-10	4.472	-1.25005
		-10	4.48224	0.659557			-10	4.48224	-1.29915
		-10	4.49248	0.641483			-10	4.49248	-1.29009
		-10	4.50272	0.518055			-10	4.50272	-1.29052
		-10	4.51296	0.525742			-10	4.51296	-1.23967
		-10	4.5232	0.575668			-10	4.5232	-1.17144
		-10	4.53344	0.649147			-10	4.53344	-1.06637
		-10	4.54368	0.590782			-10	4.54368	-0.895973
		-10	4.55392	0.449547			-10	4.55392	-0.684246
		-10	4.56416	0.378769			-10	4.56416	-0.586948
		-10	4.5744	0.410671			-10	4.5744	-0.549217
		-10	4.58464	0.540237			-10	4.58464	-0.628006
		-10	4.59488	0.580555			-10	4.59488	-0.800465
		-10	4.60512	0.663525			-10	4.60512	-0.813614
		-10	4.61536	0.742741			-10	4.61536	-0.831028
		-10	4.6256	0.723583			-10	4.6256	-0.844238
		-10	4.63584	0.594063			-10	4.63584	-0.991283
		-10	4.64608	0.498646			-10	4.64608	-1.07236
		-10	4.65632	0.390049			-10	4.65632	-1.13184
		-10	4.66656	0.386616			-10	4.66656	-1.19004
		-10	4.6768	0.499733			-10	4.6768	-1.22399
		-10	4.68704	0.466389			-10	4.68704	-1.22285
		-10	4.69728	0.512283			-10	4.69728	-1.02271
		-10	4.70752	0.529354			-10	4.70752	-0.891827
		-10	4.71776	0.548645			-10	4.71776	-0.873001
		-10	4.728	0.549335			-10	4.728	-0.95348
		-10	4.73824	0.653095			-10	4.73824	-1.06436
		-10	4.74848	0.675518			-10	4.74848	-1.16628
		-10	4.75872	0.646931			-10	4.75872	-1.22216
		-10	4.76896	0.663883			-10	4.76896	-1.10221
		-10	4.7792	0.726551			-10	4.7792	-0.979004
		-10	4.78944	0.671478			-10	4.78944	-0.880047
		-10	4.79968	0.611694			-10	4.79968	-0.915012
		-10	4.80992	0.585743			-10	4.80992	-1.0255
		-10	4.82016	0.60788			-10	4.82016	-1.09988
		-10	4.8304	0.543457			-10	4.8304	-1.08665
		-10	4.84064	0.451942			-10	4.84064	-1.23838
		-10	4.85088	0.43034			-10	4.85088	-1.31435
		-10	4.86112	0.397141			-10	4.86112	-1.44
		-10	4.87136	0.38504			-10	4.87136	-1.4196
		-10	4.8816	0.451118			-10	4.8816	-1.39974
		-10	4.89184	0.564774			-10	4.89184	-1.44003
		-10	4.90208	0.613232			-10	4.90208	-1.39902
		-10	4.91232	0.610847			-10	4.91232	-1.41002
		-10	4.92256	0.56942			-10	4.92256	-1.48681
		-10	4.9328	0.593693			-10	4.9328	-1.57851
		-10	4.94304	0.560646			-10	4.94304	-1.56636
		-10	4.95328	0.547775			-10	4.95328	-1.58025
		-10	4.96352	0.62645			-10	4.96352	-1.69736
		-10	4.97376	0.611835			-10	4.97376	-1.77146
		-10	4.984	0.65847			-10	4.984	-1.77473
		-10	4.99424	0.739605			-10	4.99424	-1.70654
		-10	5.00448	0.70295			-10	5.00448	-1.81204
		-10	5.01472	0.657959			-10	5.01472	-1.87891
		-10	5.02496	0.586494			-10	5.02496	-1.81326
		-10	5.0352	0.54174			-10	5.0352	-1.69559
		-10	5.04544	0.583763			-10	5.04544	-1.63787
		-10	5.05568	0.673027			-10	5.05568	-1.58881
		-10	5.06592	0.649803			-10	5.06592	-1.60969
		-10	5.07616	0.553471			-10	5.07616	-1.5843
		-10	5.0864	0.399906			-10	5.0864	-1.59724
		-10	5.09664	0.370319			-10	5.09664	-1.59765
		-10	5.10688	0.268742			-10	5.10688	-1.62723
		-10	5.11712	0.256844			-10	5.11712	-1.80405
		-10	5.12736	0.331219			-10	5.12736	-2.00033
		-10	5.1376	0.333984			-10	5.1376	-2.02699
		-10	5.14784	0.302788			-10	5.14784	-1.97734
		-10	5.15808	0.293442			-10	5.15808	-2.08446
		-10	5.16832	0.27203			-10	5.16832	-2.07798
		-10	5.17856	0.301903			-10	5.17856	-1.90652
		-10	5.1888	0.247963			-10	5.1888	-1.77667
		-10	5.19904	0.0487518			-10	5.19904	-1.84624
		-10	5.20928	0.0916443			-10	5.20928	-1.87547
		-10	5.21952	0.188847			-10	5.21952	-1.80961
		-10	5.22976	0.278133			-10	5.22976	-1.7522
		-10	5.24	0.333065			-10	5.24	-1.84766
		-10	5.25024	0.356087			-10	5.25024	-1.86598
		-10	5.26048	0.305481			-10	5.26048	-1.96762
		-10	5.27072	0.17062			-10	5.27072	-2.11999
		-10	5.28096	0.164516			-10	5.28096	-2.27958
		-10	5.2912	0.251167			-10	5.2912	-2.35318
		-10	5.30144	0.287777			-10	5.30144	-2.26798
		-10	5.31168	0.351208			-10	5.31168	-2.11341
		-10	5.32192	0.362617			-10	5.32192	-2.08285
		-10	5.33216	0.231487			-10	5.33216	-2.18097
		-10	5.3424	0.0851936			-10	5.3424	-2.23242
		-10	5.35264	0.0390015			-10	5.35264	-2.18838
		-10	5.36288	-0.152008			-10	5.36288	-2.20656
		-10	5.37312	-0.251846			-10	5.37312	-2.26489
		-10	5.38336	-0.308804			-10	5.38336	-2.37361
		-10	5.3936	-0.43066			-10	5.3936	-2.36616
		-10	5.40384	-0.328712			-10	5.40384	-2.30826
		-10	5.41408	-0.256485			-10	5.41408	-2.30887
		-10	5.42432	-0.24622			-10	5.42432	-2.39695
		-10	5.43456	-0.0771828			-10	5.43456	-2.35007
		-10	5.4448	0.106174			-10	5.4448	-2.33398
		-10	5.45504	0.0621643			-10	5.45504	-2.38607
		-10	5.46528	-0.0125694			-10	5.46528	-2.42061
		-10	5.47552	0.0902939			-10	5.47552	-2.43094
		-10	5.48576	0.193352			-10	5.48576	-2.449
		-10	5.496	0.145145			-10	5.496	-2.37516
		-10	5.50624	-0.117664			-10	5.50624	-2.42773
		-10	5.51648	-0.278419			-10	5.51648	-2.49455
		-10	5.52672	-0.435452			-10	5.52672	-2.39721
		-10	5.53696	-0.503784			-10	5.53696	-2.35898
		-10	5.5472	-0.569633			-10	5.5472	-2.28188
		-10	5.55744	-0.584274			-10	5.55744	-2.21805
		-10	5.56768	-0.502686			-10	5.56768	-2.20505
		-10	5.57792	-0.472683			-10	5.57792	-2.23458
		-10	5.58816	-0.416569			-10	5.58816	-2.146
		-10	5.5984	-0.341991			-10	5.5984	-2.12762
		-10	5.60864	-0.210648			-10	5.60864	-2.19071
		-10	5.61888	-0.314468			-10	5.61888	-2.30947
		-10	5.62912	-0.32988			-10	5.62912	-2.31443
		-10	5.63936	-0.410156			-10	5.63936	-2.31399
		-10	5.6496	-0.375381			-10	5.6496	-2.19585
		-10	5.65984	-0.286942			-10	5.65984	-2.10823
		-10	5.67008	-0.244717			-10	5.67008	-2.07951
		-10	5.68032	-0.0756569			-10	5.68032	-2.10263
		-10	5.69056	0.0435181			-10	5.69056	-2.15981
		-10	5.7008	-0.016037			-10	5.7008	-2.09927
		-10	5.71104	-0.0451393			-10	5.71104	-2.0563
		-10	5.72128	0.0171242			-10	5.72128	-2.12498
		-10	5.73152	-0.00732422			-10	5.73152	-2.23418
		-10	5.74176	-0.0535431			-10	5.74176	-2.15704
		-10	5.752	-0.0934906			-10	5.752	-2.18172
		-10	5.76224	-0.0684547			-10	5.76224	-2.26163
		-10	5.77248	-0.157219			-10	5.77248	-2.21201
		-10	5.78272	-0.296001			-10	5.78272	-2.05085
		-10	5.79296	-0.293404			-10	5.79296	-1.94361
		-10	5.8032	-0.112206			-10	5.8032	-2.00603
		-10	5.81344	-0.0796509			-10	5.81344	-2.04596
		-10	5.82368	-0.0539246			-10	5.82368	-2.01999
		-10	5.83392	-0.14991			-10	5.83392	-2.06995
		-10	5.84416	-0.101643			-10	5.84416	-2.06316
		-10	5.8544	-0.0693626			-10	5.8544	-2.14462
		-10	5.86464	-0.126606			-10	5.86464	-2.26319
		-10	5.87488	-0.135021			-10	5.87488	-2.46296
		-10	5.88512	-0.0798264			-10	5.88512	-2.49086
		-10	5.89536	0.0155411			-10	5.89536	-2.32779
		-10	5.9056	-0.0319901			-10	5.9056	-2.205
		-10	5.91584	-0.15382			-10	5.91584	-2.12859
		-10	5.92608	-0.191132			-10	5.92608	-2.03063
		-10	5.93632	-0.201302			-10	5.93632	-1.95608
		-10	5.94656	-0.179916			-10	5.94656	-2.01456
		-10	5.9568	-0.154751			-10	5.9568	-1.95518
		-10	5.96704	-0.164062			-10	5.96704	-2.00225
		-10	5.97728	-0.208122			-10	5.97728	-1.96439
		-10	5.98752	-0.300304			-10	5.98752	-1.83891
		-10	5.99776	-0.265842			-10	5.99776	-1.80481
		-10	6.008	-0.140148			-10	6.008	-1.80211
		-10	6.01824	0.108093			-10	6.01824	-1.83135
		-10	6.02848	0.320431			-10	6.02848	-1.85641
		-10	6.03872	0.370842			-10	6.03872	-1.89446
		-10	6.04896	0.330456			-10	6.04896	-1.93678
		-10	6.0592	0.36953			-10	6.0592	-1.84393
		-10	6.06944	0.281342			-10	6.06944	-1.72747
		-10	6.07968	0.176235			-10	6.07968	-1.72745
		-10	6.08992	0.00257111			-10	6.08992	-1.769
		-10	6.10016	-0.036747			-10	6.10016	-1.86179
		-10	6.1104	-0.0148125			-10	6.1104	-1.95602
		-10	6.12064	0.0748711			-10	6.12064	-1.99627
		-10	6.13088	0.165695			-10	6.13088	-1.90739
		-10	6.14112	0.267677			-10	6.14112	-1.76104
		-10	6.15136	0.261719			-10	6.15136	-1.68597
		-10	6.1616	0.175423			-10	6.1616	-1.6713
		-10	6.17184	0.125999			-10	6.17184	-1.56422
		-10	6.18208	0.127811			-10	6.18208	-1.45885
		-10	6.19232	0.156326			-10	6.19232	-1.42741
		-10	6.20256	0.0730705			-10	6.20256	-1.46503
		-10	6.2128	0.0329933			-10	6.2128	-1.40591
		-10	6.22304	0.141998			-10	6.22304	-1.44036
		-10	6.23328	0.341805			-10	6.23328	-1.50668
		-10	6.24352	0.359123			-10	6.24352	-1.63811
		-10	6.25376	0.453835			-10	6.25376	-1.30415
		-10	6.264	0.358112			-10	6.264	-0.85244
		-10	6.27424	0.320049			-10	6.27424	-0.768303
		-10	6.28448	0.162071			-10	6.28448	-0.832317
		-10	6.29472	0.0105553			-10	6.29472	-1.08778
		-10	6.30496	-0.0579987			-10	6.30496	-1.21397
		-10	6.3152	-0.00638199			-10	6.3152	-1.27327
		-10	6.32544	0.0935745			-10	6.32544	-1.27994
		-10	6.33568	0.210911			-10	6.33568	-1.39097
		-10	6.34592	0.337856			-10	6.34592	-1.38043
		-10	6.35616	0.3316			-10	6.35616	-1.42755
		-10	6.3664	0.238415			-10	6.3664	-1.40922
		-10	6.37664	0.272064			-10	6.37664	-1.52328
		-10	6.38688	0.303715			-10	6.38688	-1.53532
		-10	6.39712	0.299911			-10	6.39712	-1.43146
		-10	6.40736	0.299721			-10	6.40736	-1.36405
		-10	6.4176	0.33577			-10	6.4176	-1.30685
		-10	6.42784	0.286205			-10	6.42784	-1.29399
		-10	6.43808	0.208385			-10	6.43808	-1.40251
		-10	6.44832	0.163311			-10	6.44832	-1.47102
		-10	6.45856	0.0456161			-10	6.45856	-1.53358
		-10	6.4688	0.0558701			-10	6.4688	-1.5438
		-10	6.47904	0.189846			-10	6.47904	-1.57007
		-10	6.48928	0.339218			-10	6.48928	-1.48054
		-10	6.49952	0.434082			-10	6.49952	-1.36118
		-10	6.50976	0.415215			-10	6.50976	-1.3553
		-10	6.52	0.466438			-10	6.52	-1.34488
		-10	6.53024	0.47403			-10	6.53024	-1.27044
		-10	6.54048	0.417454			-10	6.54048	-1.23534
		-10	6.55072	0.457447			-10	6.55072	-1.23994
		-10	6.56096	0.438267			-10	6.56096	-1.16924
		-10	6.5712	0.424404			-10	6.5712	-1.15515
		-10	6.58144	0.303692			-10	6.58144	-1.27091
		-10	6.59168	0.300282			-10	6.59168	-1.35147
		-10	6.60192	0.392754			-10	6.60192	-1.42677
		-10	6.61216	0.582237			-10	6.61216	-1.35153
		-10	6.6224	0.588436			-10	6.6224	-1.2317
		-10	6.63264	0.533123			-10	6.63264	-1.14925
		-10	6.64288	0.44603			-10	6.64288	-1.14332
		-10	6.65312	0.387054			-10	6.65312	-1.09953
		-10	6.66336	0.368137			-10	6.66336	-1.05641
		-10	6.6736	0.362854			-10	6.6736	-0.968086
		-10	6.68384	0.367088			-10	6.68384	-0.960739
		-10	6.69408	0.399956			-10	6.69408	-0.964653
		-10	6.70432	0.5205			-10	6.70432	-1.07121
		-10	6.71456	0.415199			-10	6.71456	-1.19094
		-10	6.7248	0.368412			-10	6.7248	-1.17471
		-10	6.73504	0.373837			-10	6.73504	-1.06835
		-10	6.74528	0.482708			-10	6.74528	-1.0174
		-10	6.75552	0.558025			-10	6.75552	-1.06322
		-10	6.76576	0.586933			-10	6.76576	-1.04364
		-10	6.776	0.622269			-10	6.776	-1.008
		-10	6.78624	0.786812			-10	6.78624	-0.967751
		-10	6.79648	0.801846			-10	6.79648	-0.993263
		-10	6.80672	0.733204			-10	6.80672	-0.88924
		-10	6.81696	0.759716			-10	6.81696	-0.844082
		-10	6.8272	0.685688			-10	6.8272	-0.800083
		-10	6.83744	0.587769			-10	6.83744	-0.799366
		-10	6.84768	0.602478			-10	6.84768	-0.866886
		-10	6.85792	0.610203			-10	6.85792	-0.921627
		-10	6.86816	0.648933			-10	6.86816	-0.946663
		-10	6.8784	0.667175			-10	6.8784	-0.889084
		-10	6.88864	0.650661			-10	6.88864	-0.815781
		-10	6.89888	0.728317			-10	6.89888	-0.84462
		-10	6.90912	0.809639			-10	6.90912	-0.957474
		-10	6.91936	0.867851			-10	6.91936	-0.881191
		-10	6.9296	0.927872			-10	6.9296	-0.817009
		-10	6.93984	0.930973			-10	6.93984	-0.801167
		-10	6.95008	0.875443			-10	6.95008	-0.913795
		-10	6.96032	0.822742			-10	6.96032	-0.913082
		-10	6.97056	0.818047			-10	6.97056	-0.873112
		-10	6.9808	0.825733			-10	6.9808	-0.933968
		-10	6.99104	0.807568			-10	6.99104	-1.01393
		-10	7.00128	0.653393			-10	7.00128	-1.04161
		-10	7.01152	0.470047			-10	7.01152	-1.1366
		-10	7.02176	0.455208			-10	7.02176	-1.23999
		-10	7.032	0.420265			-10	7.032	-1.21795
		-10	7.04224	0.477486			-10	7.04224	-1.28865
		-10	7.05248	0.529999			-10	7.05248	-1.37304
		-10	7.06272	0.467438			-10	7.06272	-1.38867
		-10	7.07296	0.508816			-10	7.07296	-1.38308
		-10	7.0832	0.654953			-10	7.0832	-1.373
		-10	7.09344	0.745995			-10	7.09344	-1.33749
		-10	7.10368	0.796921			-10	7.10368	-1.32969
		-10	7.11392	0.758656			-10	7.11392	-1.28369
		-10	7.12416	0.751099			-10	7.12416	-1.27725
		-10	7.1344	0.793644			-10	7.1344	-1.29527
		-10	7.14464	0.973995			-10	7.14464	-1.21604
		-10	7.15488	0.963123			-10	7.15488	-1.25652
		-10	7.16512	1.11357			-10	7.16512	-1.32669
		-10	7.17536	1.53231			-10	7.17536	-1.38801
		-10	7.1856	1.65931			-10	7.1856	-1.40942
		-10	7.19584	1.54576			-10	7.19584	-1.44481
		-10	7.20608	1.2919			-10	7.20608	-1.22448
		-10	7.21632	1.09094			-10	7.21632	-1.04544
		-10	7.22656	1.04156			-10	7.22656	-0.820396
		-10	7.2368	1.04528			-10	7.2368	-0.737389
		-10	7.24704	0.906929			-10	7.24704	-0.714085
		-10	7.25728	0.741524			-10	7.25728	-0.728592
		-10	7.26752	0.666004			-10	7.26752	-0.855824
		-10	7.27776	0.587124			-10	7.27776	-1.01982
		-10	7.288	0.530689			-10	7.288	-1.13212
		-10	7.29824	0.468521			-10	7.29824	-1.16146
		-10	7.30848	0.530128			-10	7.30848	-1.083
		-10	7.31872	0.596733			-10	7.31872	-0.996788
		-10	7.32896	0.588112			-10	7.32896	-0.945946
		-10	7.3392	0.604424			-10	7.3392	-0.834034
		-10	7.34944	0.599224			-10	7.34944	-0.801491
		-10	7.35968	0.525063			-10	7.35968	-0.825008
		-10	7.36992	0.537201			-10	7.36992	-0.848385
		-10	7.38016	0.495644			-10	7.38016	-0.915646
		-10	7.3904	0.450401			-10	7.3904	-1.02665
		-10	7.40064	0.470787			-10	7.40064	-1.06258
		-10	7.41088	0.42804			-10	7.41088	-1.03913
		-10	7.42112	0.318905			-10	7.42112	-1.10055
		-10	7.43136	0.320774			-10	7.43136	-1.16143
		-10	7.4416	0.306614			-10	7.4416	-1.22535
		-10	7.45184	0.257439			-10	7.45184	-1.22744
		-10	7.46208	0.319057			-10	7.46208	-1.18052
		-10	7.47232	0.39373			-10	7.47232	-1.18199
		-10	7.48256	0.414795			-10	7.48256	-1.06996
		-10	7.4928	0.459545			-10	7.4928	-0.974583
		-10	7.50304	0.474281			-10	7.50304	-0.770554
		-10	7.51328	0.589497			-10	7.51328	-0.70784
		-10	7.52352	0.603386			-10	7.52352	-0.731834
		-10	7.53376	0.723			-10	7.53376	-0.763081
		-10	7.544	0.898285			-10	7.544	-0.801884
		-10	7.55424	0.994152			-10	7.55424	-0.801083
		-10	7.56448	0.934727			-10	7.56448	-0.734325
		-10	7.57472	0.842518			-10	7.57472	-0.74564
		-10	7.58496	0.807697			-10	7.58496	-0.61972
		-10	7.5952	0.859173			-10	7.5952	-0.735756
		-10	7.60544	1.00359			-10	7.60544	-0.898834
		-10	7.61568	1.03811			-10	7.61568	-1.05136
		-10	7.62592	1.01549			-10	7.62592	-0.99115
		-10	7.63616	0.918465			-10	7.63616	-0.898216
		-10	7.6464	0.898952			-10	7.6464	-0.910828
		-10	7.65664	0.850422			-10	7.65664	-0.971947
		-10	7.66688	0.8195			-10	7.66688	-1.09032
		-10	7.67712	0.833923			-10	7.67712	-1.19321
		-10	7.68736	0.908714			-10	7.68736	-1.24928
		-10	7.6976	0.887077			-10	7.6976	-1.31386
		-10	7.70784	0.866039			-10	7.70784	-1.40338
		-10	7.71808	0.878067			-10	7.71808	-1.38461
		-10	7.72832	0.851746			-10	7.72832	-1.30116
		-10	7.73856	0.761517			-10	7.73856	-1.28189
		-10	7.7488	0.746578			-10	7.7488	-1.17439
		-10	7.75904	0.820892			-10	7.75904	-1.05483
		-10	7.76928	0.94611			-10	7.76928	-0.998779
		-10	7.77952	0.968773			-10	7.77952	-0.916275
		-10	7.78976	0.960094			-10	7.78976	-0.94746
		-10	7.8	0.867661			-10	7.8	-0.97961
		-10	7.81024	0.880226			-10	7.81024	-1.11926
		-10	7.82048	0.892372			-10	7.82048	-1.25546
		-10	7.83072	0.860413			-10	7.83072	-1.30677
		-10	7.84096	0.83931			-10	7.84096	-1.24152
		-10	7.8512	0.96981			-10	7.8512	-1.30634
		-10	7.86144	1.07005			-10	7.86144	-1.25541
		-10	7.87168	1.01225			-10	7.87168	-1.123
		-10	7.88192	0.870831			-10	7.88192	-1.14455
		-10	7.89216	0.849899			-10	7.89216	-1.17022
		-10	7.9024	0.923344			-10	7.9024	-1.12267
		-10	7.91264	0.850563			-10	7.91264	-1.1428
		-10	7.92288	0.921841			-10	7.92288	-1.17254
		-10	7.93312	0.92078			-10	7.93312	-1.26205
		-10	7.94336	0.976559			-10	7.94336	-1.35187
		-10	7.9536	0.916046			-10	7.9536	-1.38173
		-10	7.96384	0.927563			-10	7.96384	-1.27567
		-10	7.97408	0.973316			-10	7.97408	-1.0983
		-10	7.98432	1.0224			-10	7.98432	-1.04458
		-10	7.99456	0.993366			-10	7.99456	-1.07033
		-10	8.0048	0.805588			-10	8.0048	-1.18827
		-10	8.01504	0.698513			-10	8.01504	-1.21056
		-10	8.02528	0.734505			-10	8.02528	-1.21773
		-10	8.03552	0.784546			-10	8.03552	-1.22056
		-10	8.04576	0.659138			-10	8.04576	-1.23473
		-10	8.056	0.575989			-10	8.056	-1.12939
		-10	8.06624	0.523026			-10	8.06624	-1.04976
		-10	8.07648	0.426525			-10	8.07648	-0.943707
		-10	8.08672	0.471241			-10	8.08672	-0.86063
		-10	8.09696	0.572426			-10	8.09696	-0.841232
		-10	8.1072	0.687893			-10	8.1072	-0.883945
		-10	8.11744	0.736851			-10	8.11744	-0.992844
		-10	8.12768	0.837036			-10	8.12768	-0.962769
		-10	8.13792	0.809402			-10	8.13792	-0.880943
		-10	8.14816	0.761909			-10	8.14816	-0.943516
		-10	8.1584	0.741035			-10	8.1584	-1.00876
		-10	8.16864	0.673885			-10	8.16864	-1.03801
		-10	8.17888	0.600727			-10	8.17888	-1.01212
		-10	8.18912	0.509769			-10	8.18912	-1.04695
		-10	8.19936	0.458927			-10	8.19936	-1.03864
		-10	8.2096	0.47266			-10	8.2096	-0.989471
		-10	8.21984	0.570721			-10	8.21984	-0.882004
		-10	8.23008	0.627975			-10	8.23008	-0.651394
		-10	8.24032	0.67585			-10	8.24032	-0.421631
		-10	8.25056	0.566429			-10	8.25056	-0.359474
		-10	8.2608	0.452919			-10	8.2608	-0.371822
		-10	8.27104	0.440617			-10	8.27104	-0.367722
		-10	8.28128	0.417835			-10	8.28128	-0.449749
		-10	8.29152	0.458855			-10	8.29152	-0.547226
		-10	8.30176	0.386696			-10	8.30176	-0.595772
		-10	8.312	0.221092			-10	8.312	-0.494846
		-10	8.32224	0.132603			-10	8.32224	-0.321373
		-10	8.33248	0.224537			-10	8.33248	-0.323112
		-10	8.34272	0.315529			-10	8.34272	-0.439999
		-10	8.35296	0.286728			-10	8.35296	-0.511417
		-10	8.3632	0.173038			-10	8.3632	-0.502762
		-10	8.37344	0.0934181			-10	8.37344	-0.432404
		-10	8.38368	0.0914879			-10	8.38368	-0.308868
		-10	8.39392	0.0880661			-10	8.39392	-0.210663
		-10	8.40416	0.113171			-10	8.40416	-0.146065
		-10	8.4144	0.150627			-10	8.4144	-0.0686035
		-10	8.42464	0.257187			-10	8.42464	0.0334396
		-10	8.43488	0.260036			-10	8.43488	0.0231895
		-10	8.44512	0.206535			-10	8.44512	0.00154114
		-10	8.45536	0.122768			-10	8.45536	-0.034832
		-10	8.4656	0.140423			-10	8.4656	-0.129673
		-10	8.47584	0.214394			-10	8.47584	-0.17831
		-10	8.48608	0.248356			-10	8.48608	-0.0825729
		-10	8.49632	0.203568			-10	8.49632	-0.18272
		-10	8.50656	0.186165			-10	8.50656	-0.158783
		-10	8.5168	0.275036			-10	8.5168	-0.0910721
		-10	8.52704	0.332886			-10	8.52704	-0.0456543
		-10	8.53728	0.381428			-10	8.53728	-0.114403
		-10	8.54752	0.418755			-10	8.54752	-0.177464
		-10	8.55776	0.403564			-10	8.55776	-0.285408
		-10	8.568	0.384361			-10	8.568	-0.517426
		-10	8.57824	0.428982			-10	8.57824	-0.714001
		-10	8.58848	0.433998			-10	8.58848	-0.842163
		-10	8.59872	0.375599			-10	8.59872	-0.751804
		-10	8.60896	0.467461			-10	8.60896	-0.647232
		-10	8.6192	0.386505			-10	8.6192	-0.53986
		-10	8.62944	0.238594			-10	8.62944	-0.384209
		-10	8.63968	0.190872			-10	8.63968	-0.233658
		-10	8.64992	0.212997			-10	8.64992	-0.102505
		-10	8.66016	0.233238			-10	8.66016	0.0571289
		-10	8.6704	0.29475			-10	8.6704	0.0598106
		-10	8.68064	0.294968			-10	8.68064	0.0604286
		-10	8.69088	0.359924			-10	8.69088	0.0904007
		-10	8.70112	0.41489			-10	8.70112	0.148083
		-10	8.71136	0.350254			-10	8.71136	0.121441
		-10	8.7216	0.235027			-10	8.7216	0.0458145
		-10	8.73184	0.0976639			-10	8.73184	-0.0478363
		-10	8.74208	0.00757599			-10	8.74208	-0.113987
		-10	8.75232	-0.139744			-10	8.75232	-0.143944
		-10	8.76256	-0.245659			-10	8.76256	-0.199696
		-10	8.7728	-0.167793			-10	8.7728	-0.0921097
		-10	8.78304	-0.0741043			-10	8.78304	0.0520134
		-10	8.79328	-0.0449715			-10	8.79328	0.0621567
		-10	8.80352	0.0323944			-10	8.80352	0.0498657
		-10	8.81376	0.163216			-10	8.81376	0.12529
		-10	8.824	0.221497			-10	8.824	0.146461
		-10	8.83424	0.27475			-10	8.83424	0.0311508
		-10	8.84448	0.181789			-10	8.84448	0.0880852
		-10	8.85472	0.100285			-10	8.85472	0.221817
		-10	8.86496	0.0383072			-10	8.86496	0.277451
		-10	8.8752	0.156876			-10	8.8752	0.327866
		-10	8.88544	0.0793762			-10	8.88544	0.239887
		-10	8.89568	-0.0332527			-10	8.89568	0.279991
		-10	8.90592	0.00716019			-10	8.90592	0.320984
		-10	8.91616	0.0220604			-10	8.91616	0.271297
		-10	8.9264	0.106483			-10	8.9264	0.340202
		-10	8.93664	0.164589			-10	8.93664	0.408546
		-10	8.94688	0.172325			-10	8.94688	0.556637
		-10	8.95712	0.155159			-10	8.95712	0.620914
		-10	8.96736	0.19154			-10	8.96736	0.612724
		-10	8.9776	0.202137			-10	8.9776	0.595276
		-10	8.98784	0.152309			-10	8.98784	0.532127
		-10	8.99808	0.13525			-10	8.99808	0.508812
		-10	9.00832	0.105091			-10	9.00832	0.449802
		-10	9.01856	0.141663			-10	9.01856	0.381413
		-10	9.0288	0.223808			-10	9.0288	0.378731
		-10	9.03904	0.17609			-10	9.03904	0.400867
		-10	9.04928	0.149723			-10	9.04928	0.422802
		-10	9.05952	0.228127			-10	9.05952	0.508789
		-10	9.06976	0.273426			-10	9.06976	0.603558
		-10	9.08	0.307137			-10	9.08	0.501335
		-10	9.09024	0.280293			-10	9.09024	0.362961
		-10	9.10048	0.131279			-10	9.10048	0.355686
		-10	9.11072	0.0710297			-10	9.11072	0.342072
		-10	9.12096	0.108391			-10	9.12096	0.278202
		-10	9.1312	0.119705			-10	9.1312	0.244644
		-10	9.14144	0.132664			-10	9.14144	0.133053
		-10	9.15168	0.129135			-10	9.15168	0.00402069
		-10	9.16192	0.0361252			-10	9.16192	-0.0966301
		-10	9.17216	-0.0155869			-10	9.17216	-0.208221
		-10	9.1824	0.00881577			-10	9.1824	-0.248154
		-10	9.19264	-0.0276489			-10	9.19264	-0.125942
		-10	9.20288	0.0274239			-10	9.20288	0.0420113
		-10	9.21312	-0.107426			-10	9.21312	0.143627
		-10	9.22336	-0.174065			-10	9.22336	0.0910645
		-10	9.2336	-0.189156			-10	9.2336	0.111366
		-10	9.24384	-0.281864			-10	9.24384	0.122906
		-10	9.25408	-0.395565			-10	9.25408	0.152973
		-10	9.26432	-0.533096			-10	9.26432	0.237431
		-10	9.27456	-0.573807			-10	9.27456	0.144043
		-10	9.2848	-0.3578			-10	9.2848	0.0764389
		-10	9.29504	-0.153057			-10	9.29504	0.038208
		-10	9.30528	-0.140125			-10	9.30528	0.0247993
		-10	9.31552	-0.308136			-10	9.31552	0.136341
		-10	9.32576	-0.29921			-10	9.32576	0.220493
		-10	9.336	-0.303726			-10	9.336	0.266651
		-10	9.34624	-0.272911			-10	9.34624	0.309135
		-10	9.35648	-0.11274			-10	9.35648	0.365177
		-10	9.36672	0.0911903			-10	9.36672	0.334217
		-10	9.37696	0.225967			-10	9.37696	0.234844
		-10	9.3872	0.224346			-10	9.3872	0.189011
		-10	9.39744	0.260025			-10	9.39744	0.202908
		-10	9.40768	0.205704			-10	9.40768	0.287357
		-10	9.41792	0.00845718			-10	9.41792	0.121681
		-10	9.42816	-0.039547			-10	9.42816	0.00714111
		-10	9.4384	-0.0376282			-10	9.4384	-0.153587
		-10	9.44864	0.0133591			-10	9.44864	-0.178955
		-10	9.45888	0.0999527			-10	9.45888	-0.132141
		-10	9.46912	0.10825			-10	9.46912	-0.159534
		-10	9.47936	0.205082			-10	9.47936	-0.0875206
		-10	9.4896	0.280052			-10	9.4896	-0.124607
		-10	9.49984	0.40818			-10	9.49984	-0.0903358
		-10	9.51008	0.42897			-10	9.51008	-0.0192261
		-10	9.52032	0.374298			-10	9.52032	-0.0528679
		-10	9.53056	0.276405			-10	9.53056	-0.0503273
		-10	9.5408	0.277084			-10	9.5408	0.104073
		-10	9.55104	0.177616			-10	9.55104	0.163879
		-10	9.56128	0.0785789			-10	9.56128	0.22427
		-10	9.57152	0.148731			-10	9.57152	0.359276
		-10	9.58176	0.266632			-10	9.58176	0.34864
		-10	9.592	0.266117			-10	9.592	0.228718
		-10	9.60224	0.162704			-10	9.60224	0.0881691
		-10	9.61248	0.20948			-10	9.61248	0.0174561
		-10	9.62272	0.237019			-10	9.62272	-0.0447731
		-10	9.63296	0.238129			-10	9.63296	-0.122677
		-10	9.6432	0.244598			-10	9.6432	-0.17284
		-10	9.65344	0.225754			-10	9.65344	-0.156437
		-10	9.66368	0.220604			-10	9.66368	-0.115524
		-10	9.67392	0.184841			-10	9.67392	-0.0212517
		-10	9.68416	0.31987			-10	9.68416	-0.130066
		-10	9.6944	0.460262			-10	9.6944	-0.0501862
		-10	9.70464	0.49501			-10	9.70464	0.0291252
		-10	9.71488	0.415226			-10	9.71488	0.058773
		-10	9.72512	0.362011			-10	9.72512	0.101677
		-10	9.73536	0.287098			-10	9.73536	0.236023
		-10	9.7456	0.181156			-10	9.7456	0.386265
		-10	9.75584	0.138969			-10	9.75584	0.398972
		-10	9.76608	0.149124			-10	9.76608	0.322189
		-10	9.77632	0.136944			-10	9.77632	0.326492
		-10	9.78656	0.0929794			-10	9.78656	0.435879
		-10	9.7968	0.223869			-10	9.7968	0.474037
		-10	9.80704	0.297863			-10	9.80704	0.434769
		-10	9.81728	0.390858			-10	9.81728	0.44841
		-10	9.82752	0.382526			-10	9.82752	0.320328
		-10	9.83776	0.352234			-10	9.83776	0.170341
		-10	9.848	0.295849			-10	9.848	0.0959663
		-10	9.85824	0.176235			-10	9.85824	0.161781
		-10	9.86848	0.196022			-10	9.86848	0.174965
		-10	9.87872	0.167198			-10	9.87872	0.0196953
		-10	9.88896	0.160103			-10	9.88896	-0.0878792
		-10	9.8992	0.15728			-10	9.8992	-0.10215
		-10	9.90944	0.208755			-10	9.90944	-0.0308952
		-10	9.91968	0.321896			-10	9.91968	-0.0240784
		-10	9.92992	0.27494			-10	9.92992	-0.0223503
		-10	9.94016	0.311371			-10	9.94016	0.0300674
		-10	9.9504	0.19886			-10	9.9504	-0.0449753
		-10	9.96064	0.225658			-10	9.96064	-0.0228271
		-10	9.97088	0.227623			-10	9.97088	-0.0576096
		-10	9.98112	0.232964			-10	9.98112	-0.0501251
		-10	9.99136	0.191898			-10	9.99136	-0.0434494
		-10	10.0016	0.152092			-10	10.0016	-0.153324
		-10	10.0118	0.276501			-10	10.0118	-0.183102
		-10	10.0221	0.316818			-10	10.0221	-0.150307
		-10	10.0323	0.309273			-10	10.0323	-0.0903244
		-10	10.0426	0.381355			-10	10.0426	-0.0326233
		-10	10.0528	0.477093			-10	10.0528	-0.101074
		-10	10.063	0.423283			-10	10.063	-0.136658
		-10	10.0733	0.477978			-10	10.0733	0.00351715
		-10	10.0835	0.462719			-10	10.0835	0.0797882
		-10	10.0938	0.36182			-10	10.0938	0.0920792
		-10	10.104	0.35952			-10	10.104	0.0403671
		-10	10.1142	0.333817			-10	10.1142	-0.0513153
		-10	10.1245	0.369736			-10	10.1245	-0.0926476
		-10	10.1347	0.334724			-10	10.1347	-0.143394
		-10	10.145	0.256771			-10	10.145	-0.305973
		-10	10.1552	0.310642			-10	10.1552	-0.477657
		-10	10.1654	0.332909			-10	10.1654	-0.437008
		-10	10.1757	0.318714			-10	10.1757	-0.43243
		-10	10.1859	0.228065			-10	10.1859	-0.458942
		-10	10.1962	0.101204			-10	10.1962	-0.518009
		-10	10.2064	-0.00770569			-10	10.2064	-0.43063
		-10	10.2166	0.041111			-10	10.2166	-0.383003
		-10	10.2269	-0.0236206			-10	10.2269	-0.341091
		-10	10.2371	0.0717468			-10	10.2371	-0.308212
		-10	10.2474	0.199409			-10	10.2474	-0.265129
		-10	10.2576	0.213486			-10	10.2576	-0.173138
		-10	10.2678	0.207241			-10	10.2678	-0.192688
		-10	10.2781	0.0751801			-10	10.2781	-0.0689735
		-10	10.2883	-0.0306168			-10	10.2883	0.0845108
		-10	10.2986	-0.073246			-10	10.2986	0.167038
		-10	10.3088	-0.050312			-10	10.3088	0.0804825
		-10	10.319	-0.0394859			-10	10.319	-0.134872
		-10	10.3293	0.000495911			-10	10.3293	-0.144493
		-10	10.3395	0.124104			-10	10.3395	-0.148712
		-10	10.3498	0.230366			-10	10.3498	-0.16111
		-10	10.36	0.172371			-10	10.36	-0.218987
		-10	10.3702	0.115246			-10	10.3702	-0.230537
		-10	10.3805	0.111263			-10	10.3805	-0.257431
		-10	10.3907	0.113113			-10	10.3907	-0.23019
		-10	10.401	0.0558434			-10	10.401	-0.281464
		-10	10.4112	-0.0319672			-10	10.4112	-0.363548
		-10	10.4214	-0.035923			-10	10.4214	-0.444851
		-10	10.4317	0.0208549			-10	10.4317	-0.456928
		-10	10.4419	0.102219			-10	10.4419	-0.51125
		-10	10.4522	0.272938			-10	10.4522	-0.520073
		-10	10.4624	0.354752			-10	10.4624	-0.441109
		-10	10.4726	0.451618			-10	10.4726	-0.363396
		-10	10.4829	0.436825			-10	10.4829	-0.338886
		-10	10.4931	0.429054			-10	10.4931	-0.416847
		-10	10.5034	0.309998			-10	10.5034	-0.350307
		-10	10.5136	0.218159			-10	10.5136	-0.375648
		-10	10.5238	0.165745			-10	10.5238	-0.334976
		-10	10.5341	0.142986			-10	10.5341	-0.381229
		-10	10.5443	0.296944			-10	10.5443	-0.425659
		-10	10.5546	0.245853			-10	10.5546	-0.422249
		-10	10.5648	0.170761			-10	10.5648	-0.455414
		-10	10.575	0.202042			-10	10.575	-0.568184
		-10	10.5853	0.130398			-10	10.5853	-0.599346
		-10	10.5955	0.0859566			-10	10.5955	-0.599453
		-10	10.6058	0.0281029			-10	10.6058	-0.597046
		-10	10.616	-0.0690384			-10	10.616	-0.667439
		-10	10.6262	-0.0764313			-10	10.6262	-0.615974
		-10	10.6365	-0.111774			-10	10.6365	-0.646267
		-10	10.6467	-0.0708504			-10	10.6467	-0.585911
		-10	10.657	-0.153595			-10	10.657	-0.497601
		-10	10.6672	-0.306038			-10	10.6672	-0.351807
		-10	10.6774	-0.393265			-10	10.6774	-0.164314
		-10	10.6877	-0.575214			-10	10.6877	-0.141533
		-10	10.6979	-0.56979			-10	10.6979	-0.200352
		-10	10.7082	-0.497204			-10	10.7082	-0.288483
		-10	10.7184	-0.399261			-10	10.7184	-0.437138
		-10	10.7286	-0.350254			-10	10.7286	-0.489433
		-10	10.7389	-0.410252			-10	10.7389	-0.481628
		-10	10.7491	-0.459976			-10	10.7491	-0.309883
		-10	10.7594	-0.507145			-10	10.7594	-0.188717
		-10	10.7696	-0.449711			-10	10.7696	-0.250481
		-10	10.7798	-0.412434			-10	10.7798	-0.241875
		-10	10.7901	-0.3452			-10	10.7901	-0.230728
		-10	10.8003	-0.331158			-10	10.8003	-0.197838
		-10	10.8106	-0.281578			-10	10.8106	-0.234875
		-10	10.8208	-0.186676			-10	10.8208	-0.291763
		-10	10.831	-0.145809			-10	10.831	-0.380955
		-10	10.8413	-0.150112			-10	10.8413	-0.387833
		-10	10.8515	-0.100666			-10	10.8515	-0.254139
		-10	10.8618	-0.152031			-10	10.8618	-0.276909
		-10	10.872	-0.241394			-10	10.872	-0.379238
		-10	10.8822	-0.214462			-10	10.8822	-0.481915
		-10	10.8925	-0.124435			-10	10.8925	-0.501999
		-10	10.9027	0.0325737			-10	10.9027	-0.564274
		-10	10.913	0.0345535			-10	10.913	-0.624237
		-10	10.9232	0.0136909			-10	10.9232	-0.72113
		-10	10.9334	-0.0455437			-10	10.9334	-0.808094
		-10	10.9437	-0.112385			-10	10.9437	-0.827011
		-10	10.9539	-0.00460815			-10	10.9539	-0.765976
		-10	10.9642	0.0365906			-10	10.9642	-0.686737
		-10	10.9744	-0.0602417			-10	10.9744	-0.714455
		-10	10.9846	-0.0680618			-10	10.9846	-0.76886
		-10	10.9949	-0.0239563			-10	10.9949	-0.718044
		-10	11.0051	-0.0401917			-10	11.0051	-0.563297
		-10	11.0154	-0.00498962			-10	11.0154	-0.464603
		-10	11.0256	-0.067894			-10	11.0256	-0.574718
		-10	11.0358	-0.0825233			-10	11.0358	-0.638542
		-10	11.0461	-0.0635452			-10	11.0461	-0.65826
		-10	11.0563	-0.0958366			-10	11.0563	-0.597881
		-10	11.0666	0.0849686			-10	11.0666	-0.648365
		-10	11.0768	0.256832			-10	11.0768	-0.752136
		-10	11.087	0.270241			-10	11.087	-0.835011
		-10	11.0973	0.216312			-10	11.0973	-0.816868
		-10	11.1075	0.210732			-10	11.1075	-0.786743
		-10	11.1178	0.326508			-10	11.1178	-0.671539
		-10	11.128	0.294025			-10	11.128	-0.676476
		-10	11.1382	0.329895			-10	11.1382	-0.725422
		-10	11.1485	0.432976			-10	11.1485	-0.828037
		-10	11.1587	0.405365			-10	11.1587	-0.90657
		-10	11.169	0.254959			-10	11.169	-0.911831
		-10	11.1792	0.183113			-10	11.1792	-0.920639
		-10	11.1894	0.0474396			-10	11.1894	-0.861702
		-10	11.1997	0.0276642			-10	11.1997	-0.825211
		-10	11.2099	0.0091629			-10	11.2099	-0.915215
		-10	11.2202	-0.0381508			-10	11.2202	-0.944851
		-10	11.2304	-0.0391045			-10	11.2304	-0.94051
		-10	11.2406	-0.0396194			-10	11.2406	-0.919365
		-10	11.2509	-0.0795174			-10	11.2509	-0.887714
		-10	11.2611	-0.0200691			-10	11.2611	-0.943695
		-10	11.2714	0.110954			-10	11.2714	-0.848362
		-10	11.2816	0.0825958			-10	11.2816	-0.782906
		-10	11.2918	0.082428			-10	11.2918	-0.844273
		-10	11.3021	0.149101			-10	11.3021	-0.875401
		-10	11.3123	0.276932			-10	11.3123	-0.806328
		-10	11.3226	0.13562			-10	11.3226	-0.781654
		-10	11.3328	-0.0513382			-10	11.3328	-0.790558
		-10	11.343	-0.184971			-10	11.343	-0.875839
		-10	11.3533	-0.277657			-10	11.3533	-0.914322
		-10	11.3635	-0.261299			-10	11.3635	-0.861427
		-10	11.3738	-0.145454			-10	11.3738	-0.696968
		-10	11.384	-0.186806			-10	11.384	-0.600239
		-10	11.3942	-0.214035			-10	11.3942	-0.656853
		-10	11.4045	-0.222031			-10	11.4045	-0.769661
		-10	11.4147	-0.283272			-10	11.4147	-0.744446
		-10	11.425	-0.369804			-10	11.425	-0.650749
		-10	11.4352	-0.427479			-10	11.4352	-0.734291
		-10	11.4454	-0.418751			-10	11.4454	-0.824722
		-10	11.4557	-0.415031			-10	11.4557	-0.960838
[truncated: 349,604+ more rows]
