# Supplementary material for: Glycinergic axonal inhibition subserves acute spatial sensitivity to sudden increases in sound intensity
Source: eLife journal article supplement (doi:10.7554/elife.62183), 2021-06-14
Supplement: supp [file elife-62183-supp-v1.zip › elife_poa_e62183_Figure_8_figure_supplement_2_source_data_1.xlsx]

## Sheet: panel A
	Bottom panel								Top panel
	ITD function		IID function		Combined function				The figure is generated using the MATLAB function patch to plot filled polygons with the following x and y coordinates, and coloring each polygon according to the spike rate (see colorbar)
	ITD (ms)	Spikes/click	IID (dB SPL)	Spikes/click	ITD (ms)	Spikes/click			Patch x coordinates	Patch Y coordinates	Spike rate/click pair
	-1.5	0.9667	-40	0.5643	-0.6	0.375			-0.5	9	1
	-1.4	0.8	-39	0.35	-0.5	0.5833			-0.5	-9	1
	-1.3	0.4	-38	0.5333	-0.45	0.8667			-0.5	-7	1
	-1.25	0.8	-37	0.3	-0.4	0.25			-0.5	7	1
	-1.2	1	-36	0.5667	-0.35	0.3
	-1.1	0.9667	-35	0.5	-0.3	0.025			-0.5	7	1
	-1.05	0.55	-34	0.6167	-0.25	0			-0.5	5	1
	-1	0.3667	-33	0.2	-0.2	0.0375			-0.5	-5	1
	-0.9	0.1	-32	0.4	-0.1	0.025			-0.5	-7	1
	-0.8	0.2	-31	0.35	0	0
	-0.7	0.08	-30	0.5267	0.2	0.05			-0.5	-3	1
	-0.6	0.04	-29	0.15					-0.5	-5	1
	-0.5	0	-28	0.3636					-0.5	5	1
	-0.4	0	-27	0.1					-0.5	3	1
	-0.3	0	-26	0.3545
	-0.25	0	-25	0.2167					-0.5	-1	1
	-0.2	0	-24	0.2818					-0.5	-3	1
	-0.15	0	-23	0					-0.5	3	1
	-0.1	0	-22	0.2091					-0.5	1	1
	-0.08	0	-21	0.2
	-0.05	0.025	-20	0.1					-0.5	-37	0.45
	0	0	-19	0.1					-0.5	-39	0.45
	0.05	0	-18	0.1273					-0.5	-39	0.45
	0.1	0	-17	0.2					-0.5	-37	0.45
	0.2	0.16	-16	0.1273
	0.3	0	-15	0					-0.5	-37	0.55
	0.4	0	-14	0.0455					-0.5	-37	0.55
	0.5	0	-13	0.1					-0.5	-35	0.55
			-12	0.0364					-0.5	-35	0.55
			-10	0.0222
			-8	0					-0.5	-33	0.7
			-6	0.0143					-0.5	-33	0.7
			-4	0.0429					-0.5	-35	0.7
			-2	0.0143					-0.5	-35	0.7
			0	0
			2	0.0143					-0.5	-31	0.8
			4	0					-0.5	-31	0.8
			6	0					-0.5	-33	0.8
			8	0					-0.5	-33	0.8
			10	0
			12	0					-0.5	-31	0.75
			14	0					-0.5	-29	0.75
			16	0					-0.5	-29	0.75
			18	0					-0.5	-31	0.75
			20	0
			22	0					-0.5	-27	0.75
			24	0					-0.5	-29	0.75
			26	0					-0.5	-29	0.75
			28	0					-0.5	-27	0.75
			30	0
									-0.5	-25	0.75
									-0.5	-25	0.75
									-0.5	-27	0.75
									-0.5	-27	0.75
									-0.5	-25	0.9
									-0.5	-23	0.9
									-0.5	-23	0.9
									-0.5	-25	0.9
									-0.5	-21	0.85
									-0.5	-23	0.85
									-0.5	-23	0.85
									-0.5	-21	0.85
									-0.5	-19	0.95
									-0.5	-19	0.95
									-0.5	-21	0.95
									-0.5	-21	0.95
									-0.5	-17	0.9
									-0.5	-19	0.9
									-0.5	-19	0.9
									-0.5	-17	0.9
									-0.5	-17	0.95
									-0.5	-17	0.95
									-0.5	-15	0.95
									-0.5	-15	0.95
									-0.5	-15	1
									-0.5	-13	1
									-0.5	-13	1
									-0.5	-15	1
									-0.5	-11	1
									-0.5	-13	1
									-0.5	-13	1
									-0.5	-11	1
									-0.5	-9	0.95
									-0.5	-9	0.95
									-0.5	-11	0.95
									-0.5	-11	0.95
									-0.5	-9	0.9
									-0.5	-9	0.9
									-0.5	-7	0.9
									-0.5	-7	0.9
									-0.5	-5	1
									-0.5	-5	1
									-0.5	-7	1
									-0.5	-7	1
									-0.5	-3	0.95
									-0.5	-3	0.95
									-0.5	-5	0.95
									-0.5	-5	0.95
									-0.5	-2.5	1
									-0.5	-1	1
									-0.5	-1	1
									-0.5	-3	1
									-0.5	-3	1
									-0.5	-1	0.966667
									-0.5	-1	0.966667
									-0.5	1	0.966667
									-0.5	1	0.966667
									-0.5	1	0.95
									-0.5	1	0.95
									-0.5	3	0.95
									-0.5	3	0.95
									-0.5	2.5	0.95
									-0.5	5	0.9
									-0.5	3	0.9
									-0.5	3	0.9
									-0.5	5	0.9
									-0.5	7	0.95
									-0.5	7	0.95
									-0.5	5	0.95
									-0.5	5	0.95
									-0.5	7	1
									-0.5	7	1
									-0.5	9	1
									-0.5	9	1
									-0.5	11	0.8
									-0.5	9	0.8
									-0.5	9	0.8
									-0.5	11	0.8
									-0.5	13	0.8
									-0.5	13	0.8
									-0.5	11	0.8
									-0.5	11	0.8
									-0.5	13	1
									-0.5	45.7	1
									-0.5	25	1
									-0.5	23	1
									-0.5	21	1
									-0.5	19	1
									-0.5	17	1
									-0.5	15	1
									-0.5	13	1
									-0.5	-2.5	0.8
									-0.5	-1	0.8
									-0.5	1	0.8
									-0.5	2.5	0.8
									-0.5	1.75	0.8
									-0.5	-1.75	0.8
									-0.5	-1	0.4
									-0.5	-1.75	0.4
									-0.5	1.75	0.4
									-0.5	1	0.4
									-0.5	-56.9	0.75
									-0.5	-63.7	0.75
									-0.5	-39	0.75
									-0.5	-39	0.75
									-0.5	-39	0.65
									-0.5	-39	0.65
									-0.5	-37	0.65
									-0.5	-37	0.65
									-0.5	-37	0.6
									-0.5	-37	0.6
									-0.5	-35	0.6
									-0.5	-35	0.6
									-0.5	-35	0.65
									-0.5	-33	0.65
									-0.5	-33	0.65
									-0.5	-35	0.65
									-0.5	-31	0.45
									-0.5	-33	0.45
									-0.5	-33	0.45
									-0.5	-31	0.45
									-0.5	-31	0.8
									-0.5	-31	0.8
									-0.5	-29	0.8
									-0.5	-29	0.8
									-0.5	-29	0.7
									-0.5	-29	0.7
									-0.5	-27	0.7
									-0.5	-27	0.7
									-0.5	-27	0.45
									-0.5	-27	0.45
									-0.5	-25	0.45
									-0.5	-25	0.45
									-0.5	-25	0.75
									-0.5	-23	0.75
									-0.5	-23	0.75
									-0.5	-25	0.75
									-0.5	-21	0.65
									-0.5	-23	0.65
									-0.5	-23	0.65
									-0.5	-21	0.65
									-0.5	-21	0.65
									-0.5	-21	0.65
									-0.5	-19	0.65
									-0.5	-19	0.65
									-0.5	-19	0.8
									-0.5	-19	0.8
									-0.5	-17	0.8
									-0.5	-17	0.8
									-0.5	-15	0.6
									-0.5	-15	0.6
									-0.5	-17	0.6
									-0.5	-17	0.6
									-0.5	-13	0.8
									-0.5	-13	0.8
									-0.5	-15	0.8
									-0.5	-15	0.8
									-0.5	-11	0.75
									-0.5	-11	0.75
									-0.5	-13	0.75
									-0.5	-13	0.75
									-0.5	-9	0.65
									-0.5	-9	0.65
									-0.5	-11	0.65
									-0.5	-11	0.65
									-0.5	-9	0.65
									-0.5	-9	0.65
									-0.5	-7	0.65
									-0.5	-7	0.65
									-0.5	-5	0.7
									-0.5	-5	0.7
									-0.5	-7	0.7
									-0.5	-7	0.7
									-0.5	-3	0.7
									-0.5	-3	0.7
									-0.5	-5	0.7
									-0.5	-5	0.7
									-0.5	-1	0.7
									-0.5	-1.5	0.7
									-0.5	-3	0.7
									-0.5	-3	0.7
									-0.5	-2.5	0.7
									-0.5	-1.75	0.7
									-0.5	-1	0.7
									-0.5	-1	0.8
									-0.5	1	0.8
									-0.5	1	0.8
									-0.5	-1	0.8
									-0.5	1	0.75
									-0.5	1.5	0.75
									-0.5	3	0.75
									-0.5	3	0.75
									-0.5	2.5	0.75
									-0.5	1.75	0.75
									-0.5	1	0.75
									-0.5	5	0.75
									-0.5	3	0.75
									-0.5	3	0.75
									-0.5	5	0.75
									-0.5	7	0.7
									-0.5	7	0.7
									-0.5	5	0.7
									-0.5	5	0.7
									-0.5	7	0.85
									-0.5	9	0.85
									-0.5	9	0.85
									-0.5	7	0.85
									-0.5	11	0.65
									-0.5	9	0.65
									-0.5	9	0.65
									-0.5	11	0.65
									-0.5	13	0.55
									-0.5	13	0.55
									-0.5	11	0.55
									-0.5	11	0.55
									-0.5	13	0.4
									-0.5	13	0.4
									-0.5	15	0.4
									-0.5	15	0.4
									-0.5	15	0.45
									-0.5	17	0.45
									-0.5	17	0.45
									-0.5	15	0.45
									-0.5	17	0.2
									-0.5	17	0.2
									-0.5	19	0.2
									-0.5	19	0.2
									-0.5	19	0.5
									-0.5	19	0.5
									-0.5	21	0.5
									-0.5	21	0.5
									-0.5	21	0.25
									-0.5	23	0.25
									-0.5	23	0.25
									-0.5	21	0.25
									-0.5	23	0.4
									-0.5	23	0.4
									-0.5	25	0.4
									-0.5	25	0.4
									-0.5	1	1
									-0.5	1.5	1
									-0.5	1	1
									-0.5	-1	1
									-0.5	-1.5	1
									-0.5	-1	1
									-0.5	-39	0.65
									-0.5	-56.9	0.65
									-0.5	-54.1	0.65
									-0.5	-39	0.65
									-0.5	-37	0.5
									-0.5	-37	0.5
									-0.5	-39	0.5
									-0.5	-39	0.5
									-0.5	-37	0.5
									-0.5	-35	0.5
									-0.5	-35	0.5
									-0.5	-37	0.5
									-0.5	-33	0.9
									-0.5	-33	0.9
									-0.5	-35	0.9
									-0.5	-35	0.9
									-0.5	-31	0.8
									-0.5	-33	0.8
									-0.5	-33	0.8
									-0.5	-31	0.8
									-0.5	-29	0.7
									-0.5	-31	0.7
									-0.5	-31	0.7
									-0.5	-29	0.7
									-0.5	-29	0.8
									-0.5	-27	0.8
									-0.5	-27	0.8
									-0.5	-29	0.8
									-0.5	-25	0.55
									-0.5	-27	0.55
									-0.5	-27	0.55
									-0.5	-25	0.55
									-0.5	-23	0.9
									-0.5	-23	0.9
									-0.5	-25	0.9
									-0.5	-25	0.9
									-0.5	-21	0.65
									-0.5	-23	0.65
									-0.5	-23	0.65
									-0.5	-21	0.65
									-0.5	-19	0.85
									-0.5	-19	0.85
									-0.5	-21	0.85
									-0.5	-21	0.85
									-0.5	-19	0.8
									-0.5	-19	0.8
									-0.5	-17	0.8
									-0.5	-17	0.8
									-0.5	-17	0.85
									-0.5	-17	0.85
									-0.5	-15	0.85
									-0.5	-15	0.85
									-0.5	-13	0.9
									-0.5	-15	0.9
									-0.5	-15	0.9
									-0.5	-13	0.9
									-0.5	-13	0.9
									-0.5	-11	0.9
									-0.5	-11	0.9
									-0.5	-13	0.9
									-0.5	-9	1
									-0.5	-9	1
									-0.5	-11	1
									-0.5	-11	1
									-0.5	-9	0.9
									-0.5	-9	0.9
									-0.5	-7	0.9
									-0.5	-7	0.9
									-0.5	-5	0.85
									-0.5	-7	0.85
									-0.5	-7	0.85
									-0.5	-5	0.85
									-0.5	-3	0.95
									-0.5	-5	0.95
									-0.5	-5	0.95
									-0.5	-3	0.95
									-0.5	-1	0.85
									-0.5	-1	0.85
									-0.5	-3	0.85
									-0.5	-3	0.85
									-0.5	-1.5	0.85
									-0.5	1	0.966667
									-0.5	-1	0.966667
									-0.5	-1	0.966667
									-0.5	1	0.966667
									-0.5	1	0.85
									-0.5	1	0.85
									-0.5	3	0.85
									-0.5	3	0.85
									-0.5	1.5	0.85
									-0.5	5	0.65
									-0.5	3	0.65
									-0.5	3	0.65
									-0.5	5	0.65
									-0.5	7	0.85
									-0.5	7	0.85
									-0.5	5	0.85
									-0.5	5	0.85
									-0.5	7	0.7
									-0.5	9	0.7
									-0.5	9	0.7
									-0.5	7	0.7
									-0.5	9	0.5
									-0.5	11	0.5
									-0.5	11	0.5
									-0.5	9	0.5
									-0.5	13	0.45
									-0.5	11	0.45
									-0.5	11	0.45
									-0.5	13	0.45
									-0.5	13	0.2
									-0.5	13	0.2
									-0.5	15	0.2
									-0.5	15	0.2
									-0.5	15	0.45
									-0.5	17	0.45
									-0.5	17	0.45
									-0.5	15	0.45
									-0.5	19	0.15
									-0.5	17	0.15
									-0.5	17	0.15
									-0.5	19	0.15
									-0.5	19	0.2
									-0.5	19	0.2
									-0.5	21	0.2
									-0.5	21	0.2
									-0.5	23	0.25
									-0.5	21	0.25
									-0.5	21	0.25
									-0.5	23	0.25
									-0.5	23	0.2
									-0.5	25	0.2
									-0.5	25.75	0.2
									-0.5	25	0.2
									-0.5	23	0.2
									-0.5	-39	1
									-0.5	-39	1
									-0.5	-52.8	1
									-0.5	-54.1	1
									-0.5	-39	0.65
									-0.5	-37	0.65
									-0.5	-37	0.65
									-0.5	-39	0.65
									-0.5	-35	0.85
									-0.5	-37	0.85
									-0.5	-37	0.85
									-0.5	-35	0.85
									-0.5	-35	0.7
									-0.5	-35	0.7
									-0.5	-33	0.7
									-0.5	-33	0.7
									-0.5	-33	0.8
									-0.5	-31	0.8
									-0.5	-31	0.8
									-0.5	-33	0.8
									-0.5	-31	0.55
									-0.5	-29	0.55
									-0.5	-29	0.55
									-0.5	-31	0.55
									-0.5	-29	0.8
									-0.5	-27	0.8
									-0.5	-27	0.8
									-0.5	-29	0.8
									-0.5	-27	0.75
									-0.5	-25	0.75
									-0.5	-25	0.75
									-0.5	-27	0.75
									-0.5	-23	0.6
									-0.5	-25	0.6
									-0.5	-25	0.6
									-0.5	-23	0.6
									-0.5	-23	0.7
									-0.5	-21	0.7
									-0.5	-21	0.7
									-0.5	-23	0.7
									-0.5	-19	0.9
									-0.5	-21	0.9
									-0.5	-21	0.9
									-0.5	-19	0.9
									-0.5	-17	0.9
									-0.5	-19	0.9
									-0.5	-19	0.9
									-0.5	-17	0.9
									-0.5	-17	0.9
									-0.5	-15	0.9
									-0.5	-15	0.9
									-0.5	-17	0.9
									-0.5	-13	0.9
									-0.5	-15	0.9
									-0.5	-15	0.9
									-0.5	-13	0.9
									-0.5	-11	0.8
									-0.5	-11	0.8
									-0.5	-13	0.8
									-0.5	-13	0.8
									-0.5	-9	0.8
									-0.5	-11	0.8
									-0.5	-11	0.8
									-0.5	-9	0.8
									-0.5	-9	0.85
									-0.5	-7	0.85
									-0.5	-7	0.85
									-0.5	-9	0.85
									-0.5	-5	0.65
									-0.5	-7	0.65
									-0.5	-7	0.65
									-0.5	-5	0.65
									-0.5	-3	0.7
									-0.5	-5	0.7
									-0.5	-5	0.7
									-0.5	-3	0.7
									-0.5	-3	0.55
									-0.5	-1	0.55
									-0.5	-1	0.55
									-0.5	-3	0.55
									-0.5	-1	0.55
									-0.5	-1	0.55
									-0.5	1	0.55
									-0.5	1	0.55
									-0.5	1	0.4
									-0.5	3	0.4
									-0.5	3	0.4
									-0.5	1	0.4
									-0.5	5	0.35
									-0.5	3	0.35
									-0.5	3	0.35
									-0.5	5	0.35
									-0.5	5	0.4
									-0.5	7	0.4
									-0.5	7	0.4
									-0.5	5	0.4
									-0.5	7	0.5
									-0.5	9	0.5
									-0.5	9	0.5
									-0.5	7	0.5
									-0.5	9	0.5
									-0.5	9	0.5
									-0.5	11	0.5
									-0.5	11	0.5
									-0.5	13	0.5
									-0.5	11	0.5
									-0.5	11	0.5
									-0.5	13	0.5
									-0.5	13	0.15
									-0.5	15	0.15
									-0.5	15	0.15
									-0.5	13	0.15
									-0.5	17	0.05
									-0.5	17	0.05
									-0.5	15	0.05
									-0.5	15	0.05
									-0.5	17	0.1
									-0.5	17	0.1
									-0.5	19	0.1
									-0.5	19	0.1
									-0.5	19	0.05
									-0.5	19	0.05
									-0.5	21	0.05
									-0.5	21	0.05
									-0.5	23	0.1
									-0.5	23	0.1
									-0.5	21	0.1
									-0.5	21	0.1
									-0.5	23	0
									-0.5	23	0
									-0.5	25	0
									-0.5	25	0
									-0.5	25.75	0.1
									-0.5	36.85	0.1
									-0.5	35	0.1
									-0.5	33	0.1
									-0.5	31	0.1
									-0.5	29	0.1
									-0.5	27	0.1
									-0.5	25	0.1
									-0.5	25	0.1
									-0.5	-39	0.95
									-0.5	-50.4	0.95
									-0.5	-52.8	0.95
									-0.5	-39	0.95
									-0.5	-37	0.75
									-0.5	-37	0.75
									-0.5	-39	0.75
									-0.5	-39	0.75
									-0.5	-37	0.6
									-0.5	-37	0.6
									-0.5	-35	0.6
									-0.5	-35	0.6
									-0.5	-35	0.6
									-0.5	-33	0.6
									-0.5	-33	0.6
									-0.5	-35	0.6
									-0.5	-31	0.75
									-0.5	-33	0.75
									-0.5	-33	0.75
									-0.5	-31	0.75
									-0.5	-31	0.65
									-0.5	-29	0.65
									-0.5	-29	0.65
									-0.5	-31	0.65
									-0.5	-29	0.7
									-0.5	-27	0.7
									-0.5	-27	0.7
									-0.5	-29	0.7
									-0.5	-27	0.65
									-0.5	-25	0.65
									-0.5	-25	0.65
									-0.5	-27	0.65
									-0.5	-23	0.95
									-0.5	-25	0.95
									-0.5	-25	0.95
									-0.5	-23	0.95
									-0.5	-21	0.55
									-0.5	-23	0.55
									-0.5	-23	0.55
									-0.5	-21	0.55
									-0.5	-19	0.8
									-0.5	-19	0.8
									-0.5	-21	0.8
									-0.5	-21	0.8
									-0.5	-19	0.6
									-0.5	-17	0.6
									-0.5	-17	0.6
									-0.5	-19	0.6
									-0.5	-17	0.5
									-0.5	-15	0.5
									-0.5	-15	0.5
									-0.5	-17	0.5
									-0.5	-13	0.9
									-0.5	-15	0.9
									-0.5	-15	0.9
									-0.5	-13	0.9
									-0.5	-13	0.75
									-0.5	-11	0.75
									-0.5	-11	0.75
									-0.5	-13	0.75
									-0.5	-11	0.65
									-0.5	-9	0.65
									-0.5	-9	0.65
									-0.5	-11	0.65
									-0.5	-9	0.8
									-0.5	-9	0.8
									-0.5	-7	0.8
									-0.5	-7	0.8
									-0.5	-7	0.2
									-0.5	-5	0.2
									-0.5	-5	0.2
									-0.5	-7	0.2
									-0.5	-3	0.55
									-0.5	-3	0.55
									-0.5	-5	0.55
									-0.5	-5	0.55
									-0.5	-1	0.2
									-0.5	-3	0.2
									-0.5	-3	0.2
									-0.5	-1.5	0.2
									-0.5	-1	0.2
									-0.5	-1	0.366667
									-0.5	1	0.366667
									-0.5	1	0.366667
									-0.5	-1	0.366667
									-0.5	1	0.3
									-0.5	1	0.3
									-0.5	3	0.3
									-0.5	3	0.3
									-0.5	5	0.2
									-0.5	5	0.2
									-0.5	3	0.2
									-0.5	3	0.2
									-0.5	7	0.15
									-0.5	5	0.15
									-0.5	5	0.15
									-0.5	7	0.15
									-0.5	7	0.15
									-0.5	9	0.15
									-0.5	9	0.15
									-0.5	7	0.15
									-0.5	11	0.1
									-0.5	11	0.1
									-0.5	9	0.1
									-0.5	9	0.1
									-0.5	13	0.15
									-0.5	15	0.15
									-0.5	13	0.15
									-0.5	11.5	0.15
									-0.5	11	0.15
									-0.5	11	0.15
									-0.5	-1	0.1
									-0.5	1	0.1
									-0.5	3	0.1
									-0.5	-0.75	0.1
									-0.5	-1.5	0.1
									-0.5	-50.4	0.95
									-0.5	-49	0.95
									-0.5	-47.375	0.95
									-0.5	-39	0.95
									-0.5	-39	0.95
									-0.5	-37	0.7
									-0.5	-37	0.7
									-0.5	-39	0.7
									-0.5	-39	0.7
									-0.5	-35	0.5
									-0.5	-35	0.5
									-0.5	-37	0.5
									-0.5	-37	0.5
									-0.5	-35	0.45
									-0.5	-35	0.45
									-0.5	-33	0.45
									-0.5	-33	0.45
									-0.5	-33	0.55
									-0.5	-33	0.55
									-0.5	-31	0.55
									-0.5	-31	0.55
									-0.5	-31	0.55
									-0.5	-31	0.55
									-0.5	-29	0.55
									-0.5	-29	0.55
									-0.5	-29	0.4
									-0.5	-29	0.4
									-0.5	-27	0.4
									-0.5	-27	0.4
									-0.5	-25	0.35
									-0.5	-25	0.35
									-0.5	-27	0.35
									-0.5	-27	0.35
									-0.5	-23	0.45
									-0.5	-23	0.45
									-0.5	-25	0.45
									-0.5	-25	0.45
									-0.5	-23	0.2
									-0.5	-23	0.2
									-0.5	-21	0.2
									-0.5	-21	0.2
									-0.5	-19	0.3
									-0.5	-19	0.3
									-0.5	-21	0.3
									-0.5	-21	0.3
									-0.5	-19	0.1
									-0.5	-19	0.1
									-0.5	-17	0.1
									-0.5	-17	0.1
									-0.5	-17	0.05
									-0.5	-15	0.05
									-0.5	-15	0.05
									-0.5	-17	0.05
									-0.5	-13	0.25
									-0.5	-15	0.25
									-0.5	-15	0.25
									-0.5	-13	0.25
									-0.5	-13	0.15
									-0.5	-13	0.15
									-0.5	-11	0.15
									-0.5	-11	0.15
									-0.5	-11	0.15
									-0.5	-9	0.15
									-0.5	-9	0.15
									-0.5	-11	0.15
									-0.5	-9	0.15
									-0.5	-9	0.15
									-0.5	-7	0.15
									-0.5	-7	0.15
									-0.5	-5	0.05
									-0.5	-7	0.05
									-0.5	-7	0.05
									-0.5	-5	0.05
									-0.5	-5	0.05
									-0.5	-3	0.05
									-0.5	-3	0.05
									-0.5	-5	0.05
									-0.5	-1.5	0.05
									-0.5	-3	0.05
									-0.5	-3	0.05
									-0.5	-1.5	0.05
									-0.5	-0.75	0.05
									-0.5	-0.75	0.2
									-0.5	-1.5	0.2
									-0.5	-1	0.2
									-0.5	1	0.2
									-0.5	3	0.2
									-0.5	-47.375	0.75
									-0.5	-47	0.75
									-0.5	-45	0.75
									-0.5	-39	0.75
									-0.5	-39	0.75
									-0.5	-37	0.475
									-0.5	-39	0.475
									-0.5	-39	0.475
									-0.5	-37	0.475
									-0.5	-35	0.35
									-0.5	-37	0.35
									-0.5	-37	0.35
									-0.5	-35	0.35
									-0.5	-35	0.375
									-0.5	-35	0.375
									-0.5	-33	0.375
									-0.5	-33	0.375
									-0.5	-33	0.325
									-0.5	-31	0.325
									-0.5	-31	0.325
									-0.5	-33	0.325
									-0.5	-29	0.4
									-0.5	-29	0.4
									-0.5	-31	0.4
									-0.5	-31	0.4
									-0.5	-29	0.375
									-0.5	-27	0.375
									-0.5	-27	0.375
									-0.5	-29	0.375
									-0.5	-25	0.25
									-0.5	-27	0.25
									-0.5	-27	0.25
									-0.5	-25	0.25
									-0.5	-23	0.4
									-0.5	-23	0.4
									-0.5	-25	0.4
									-0.5	-25	0.4
									-0.5	-23	0.275
									-0.5	-21	0.275
									-0.5	-21	0.275
									-0.5	-23	0.275
									-0.5	-19	0.2
									-0.5	-19	0.2
									-0.5	-21	0.2
									-0.5	-21	0.2
									-0.5	-19	0.225
									-0.5	-19	0.225
									-0.5	-17	0.225
									-0.5	-17	0.225
									-0.5	-15	0.2
									-0.5	-15	0.2
									-0.5	-17	0.2
									-0.5	-17	0.2
									-0.5	-13	0.375
									-0.5	-15	0.375
									-0.5	-15	0.375
									-0.5	-13	0.375
									-0.5	-13	0.3
									-0.5	-11	0.3
									-0.5	-11	0.3
									-0.5	-13	0.3
									-0.5	-11	0.25
									-0.5	-9	0.25
									-0.5	-9	0.25
									-0.5	-11	0.25
									-0.5	-7	0.3
									-0.5	-9	0.3
									-0.5	-9	0.3
									-0.5	-7	0.3
									-0.5	-7	0.025
									-0.5	-5	0.025
									-0.5	-5	0.025
									-0.5	-7	0.025
									-0.5	-5	0.125
									-0.5	-5	0.125
									-0.5	-3	0.125
									-0.5	-3	0.125
									-0.5	-3	0.075
									-0.5	-3	0.075
									-0.5	-1.5	0.075
									-0.5	-1	0.075
									-0.5	-1	0.075
									-0.5	1	0.08
									-0.5	-1	0.08
									-0.5	-1	0.08
									-0.5	1	0.08
									-0.5	1	0.025
									-0.5	1	0.025
									-0.5	3	0.025
									-0.5	3	0.025
									-0.5	5	0
									-0.5	5	0
									-0.5	3	0
									-0.5	3	0
									-0.5	7	0
									-0.5	7	0
									-0.5	5	0
									-0.5	5	0
									-0.5	7	0.05
									-0.5	9	0.05
									-0.5	11	0.05
									-0.5	11.5	0.05
									-0.5	11	0.05
									-0.5	9	0.05
									-0.5	7	0.05
									-0.5	-42.8333	0.9
									-0.5	-39.5	0.9
									-0.5	-39	0.9
									-0.5	-39	0.9
									-0.5	-45	0.9
									-0.5	-43.5	0.9
									-0.5	-38.5	0.725
									-0.5	-37.5	0.725
									-0.5	-37	0.725
									-0.5	-37	0.725
									-0.5	-39	0.725
									-0.5	-39	0.725
									-0.5	-35	0.375
									-0.5	-35.5	0.375
									-0.5	-36.5	0.375
									-0.5	-37	0.375
									-0.5	-37	0.375
									-0.5	-35	0.375
									-0.5	-33	0.575
									-0.5	-33	0.575
									-0.5	-35	0.575
									-0.5	-35	0.575
									-0.5	-34.5	0.575
									-0.5	-33.5	0.575
									-0.5	-31.5	0.5
									-0.5	-31	0.5
									-0.5	-31	0.5
									-0.5	-33	0.5
									-0.5	-33	0.5
									-0.5	-32.5	0.5
									-0.5	-30.5	0.55
									-0.5	-29.5	0.55
									-0.5	-29	0.55
									-0.5	-29	0.55
									-0.5	-31	0.55
									-0.5	-31	0.55
									-0.5	-27.5	0.55
									-0.5	-27	0.55
									-0.5	-27	0.55
									-0.5	-29	0.55
									-0.5	-29	0.55
									-0.5	-28.5	0.55
									-0.5	-26.5	0.2
									-0.5	-27	0.2
									-0.5	-27	0.2
									-0.5	-25	0.2
									-0.5	-25	0.2
									-0.5	-25.5	0.2
									-0.5	-23.5	0.475
									-0.5	-24.5	0.475
									-0.5	-25	0.475
									-0.5	-25	0.475
									-0.5	-23	0.475
									-0.5	-23	0.475
									-0.5	-23	0.175
									-0.5	-23	0.175
									-0.5	-21	0.175
									-0.5	-21	0.175
									-0.5	-21.5	0.175
									-0.5	-22.5	0.175
									-0.5	-19	0.4
									-0.5	-19	0.4
									-0.5	-21	0.4
									-0.5	-21	0.4
									-0.5	-20.5	0.4
									-0.5	-19.5	0.4
									-0.5	-17	0.3
									-0.5	-17	0.3
									-0.5	-19	0.3
									-0.5	-19	0.3
									-0.5	-18.5	0.3
									-0.5	-17.5	0.3
									-0.5	-15	0.2
									-0.5	-15.5	0.2
									-0.5	-16.5	0.2
									-0.5	-17	0.2
									-0.5	-17	0.2
									-0.5	-15	0.2
									-0.5	-13	0.175
									-0.5	-13.5	0.175
									-0.5	-14.5	0.175
									-0.5	-15	0.175
									-0.5	-15	0.175
									-0.5	-13	0.175
									-0.5	-13	0.15
									-0.5	-13	0.15
									-0.5	-11	0.15
									-0.5	-11	0.15
									-0.5	-11.5	0.15
									-0.5	-12.5	0.15
									-0.5	-11	0.075
									-0.5	-11	0.075
									-0.5	-9	0.075
									-0.5	-9	0.075
									-0.5	-9.5	0.075
									-0.5	-10.5	0.075
									-0.5	-7	0.125
									-0.5	-7.5	0.125
									-0.5	-8.5	0.125
									-0.5	-9	0.125
									-0.5	-9	0.125
									-0.5	-7	0.125
									-0.5	-5	0.025
									-0.5	-7	0.025
									-0.5	-7	0.025
									-0.5	-6.5	0.025
									-0.5	-5	0.025
									-0.5	-5	0
									-0.5	-5	0
									-0.5	-3	0
									-0.5	-3	0
									-0.5	-3	0
									-0.5	-3	0
									-0.5	-1	0
									-0.5	-1	0
									-0.5	-1	0.04
									-0.5	-1	0.04
									-0.5	1	0.04
									-0.5	1	0.04
									-0.5	3	0.05
									-0.5	3	0.05
									-0.5	1	0.05
									-0.5	1	0.05
									-0.5	5	0
									-0.5	3	0
									-0.5	3	0
									-0.5	5	0
									-0.5	5	0
									-0.45	7	0
									-0.5	7	0
									-0.5	5	0
									-0.5	7	0
									-0.5	9	0
									-0.4	9	0
									-0.4	7.5	0
									-0.45	7	0
									-0.5	11	0
									-0.4	11	0
									-0.4	9	0
									-0.5	9	0
									-0.375	13	0
									-0.4	11	0
									-0.5	11	0
									-0.5	11.5	0
									-0.5	13	0
									-0.375	13	0
									-0.5	13	0
									-0.5	15	0
									-0.325	15	0
									-0.325	15	0
									-0.3	15.6667	0
									-0.3	17	0
									-0.5	17	0
									-0.5	15	0
									-0.5	17	0
									-0.3	17	0
									-0.3	19	0
									-0.5	19	0
									-0.3	21	0
									-0.3	19	0
									-0.5	19	0
									-0.5	21	0
									-0.3	21	0
									-0.5	21	0
									-0.5	23	0
									-0.3	23	0
									-0.5	23	0
									-0.3	23	0
									-0.3	25	0
									-0.5	25	0
									-0.5	27	0
									-0.5	25	0
									-0.3	25	0
									-0.3	27	0
									-0.5	27	0
									-0.3	27	0
									-0.3	29	0
									-0.5	29	0
									-0.5	31	0
									-0.3	31	0
									-0.3	29	0
									-0.5	29	0
									-0.5	33	0
									-0.283333	33	0
									-0.3	31	0
									-0.5	31	0
									-0.5	35	0
									-0.25	35	0
									-0.283333	33	0
									-0.5	33	0
									-0.5	-42.8333	1.11667
									-0.5	-39.5	1.11667
									-0.475	-39.5	1.11667
									-0.475	-41.5	1.11667
									-0.5	-42.5	1.11667
									-0.475	-38.5	1.15
									-0.5	-38.5	1.15
									-0.5	-39	1.15
									-0.5	-39.5	1.15
									-0.475	-39.5	1.15
									-0.45	-39	1.15
									-0.475	-38.5	0.9
									-0.475	-37.5	0.9
									-0.5	-37.5	0.9
									-0.5	-38.5	0.9
									-0.5	-36.5	0.8
									-0.475	-36.5	0.8
									-0.45	-37	0.8
									-0.475	-37.5	0.8
									-0.5	-37.5	0.8
									-0.5	-37	0.8
									-0.5	-35.5	0.916667
									-0.475	-35.5	0.916667
									-0.475	-36.5	0.916667
									-0.5	-36.5	0.916667
									-0.475	-34.5	0.55
									-0.475	-35.5	0.55
									-0.5	-35.5	0.55
									-0.5	-35	0.55
									-0.5	-34.5	0.55
									-0.5	-33.5	0.65
									-0.5	-34.5	0.65
									-0.475	-34.5	0.65
									-0.475	-33.5	0.65
									-0.5	-32.5	0.15
									-0.475	-32.5	0.15
									-0.475	-33.5	0.15
									-0.5	-33.5	0.15
									-0.5	-33	0.15
									-0.475	-31.5	0.55
									-0.5	-31.5	0.55
									-0.5	-32.5	0.55
									-0.475	-32.5	0.55
									-0.5	-31.5	0.25
									-0.475	-31.5	0.25
									-0.475	-30.5	0.25
									-0.5	-30.5	0.25
									-0.5	-31	0.25
									-0.5	-30.5	0.583333
									-0.5	-29.5	0.583333
									-0.475	-29.5	0.583333
									-0.475	-30.5	0.583333
									-0.475	-29.5	0.15
									-0.475	-28.5	0.15
									-0.5	-28.5	0.15
									-0.5	-29	0.15
									-0.5	-29.5	0.15
									-0.475	-27.5	0.483333
									-0.5	-27.5	0.483333
									-0.5	-28.5	0.483333
									-0.475	-28.5	0.483333
									-0.475	-27.5	0.15
									-0.5	-27.5	0.15
									-0.5	-27	0.15
									-0.5	-26.5	0.15
									-0.475	-26.5	0.15
									-0.5	-26.5	0.333333
									-0.475	-26.5	0.333333
									-0.475	-25.5	0.333333
									-0.5	-25.5	0.333333
									-0.5	-25.5	0.1
									-0.5	-25	0.1
									-0.5	-24.5	0.1
									-0.475	-24.5	0.1
									-0.475	-25.5	0.1
									-0.5	-23.5	0.45
									-0.5	-24.5	0.45
									-0.475	-24.5	0.45
									-0.475	-23.5	0.45
									-0.475	-22.5	0.15
									-0.475	-23.5	0.15
									-0.5	-23.5	0.15
									-0.5	-23	0.15
									-0.5	-22.5	0.15
									-0.475	-21.5	0.283333
									-0.5	-21.5	0.283333
									-0.5	-22.5	0.283333
									-0.475	-22.5	0.283333
									-0.475	-20.5	0.05
									-0.5	-20.5	0.05
									-0.5	-21	0.05
									-0.5	-21.5	0.05
									-0.475	-21.5	0.05
									-0.475	-20.5	0.183333
									-0.5	-20.5	0.183333
									-0.5	-19.5	0.183333
									-0.475	-19.5	0.183333
									-0.475	-19.5	0
									-0.5	-19.5	0
									-0.5	-19	0
									-0.5	-18.5	0
									-0.475	-18.5	0
									-0.475	-17.5	0.1
									-0.475	-18.5	0.1
									-0.5	-18.5	0.1
									-0.5	-17.5	0.1
									-0.475	-17.5	0
									-0.5	-17.5	0
									-0.5	-17	0
									-0.5	-16.5	0
									-0.475	-16.5	0
									-0.475	-16.5	0.05
									-0.5	-16.5	0.05
									-0.5	-15.5	0.05
									-0.475	-15.5	0.05
									-0.475	-15.5	0.05
									-0.5	-15.5	0.05
									-0.5	-15	0.05
									-0.5	-14.5	0.05
									-0.475	-14.5	0.05
									-0.5	-14.5	0.1
									-0.475	-14.5	0.1
									-0.475	-13.5	0.1
									-0.5	-13.5	0.1
									-0.5	-13	0.05
									-0.5	-13.5	0.05
									-0.475	-13.5	0.05
									-0.475	-12.5	0.05
									-0.5	-12.5	0.05
									-0.5	-12.5	0
									-0.475	-12.5	0
									-0.475	-11.5	0
									-0.5	-11.5	0
									-0.5	-11	0.05
									-0.5	-10.5	0.05
									-0.475	-10.5	0.05
									-0.475	-11.5	0.05
									-0.5	-11.5	0.05
									-0.5	-10.5	0.05
									-0.475	-10.5	0.05
									-0.45	-10	0.05
									-0.45	-9.5	0.05
									-0.5	-9.5	0.05
									-0.5	-9.5	0
									-0.5	-9	0
									-0.5	-8.5	0
									-0.45	-8.5	0
									-0.4375	-9	0
									-0.45	-9.5	0
									-0.45	-8.5	0
									-0.5	-8.5	0
									-0.5	-7.5	0
									-0.45	-7.5	0
									-0.45	-6.5	0
									-0.5	-6.5	0
									-0.5	-7	0
									-0.5	-7.5	0
									-0.45	-7.5	0
									-0.4375	-7	0
									-0.45	-6.5	0
									-0.45	-5	0
									-0.5	-5	0
									-0.5	-6.5	0
									-0.5	-3	0
									-0.45	-3	0
									-0.45	-5	0
									-0.5	-5	0
									-0.5	-1	0
									-0.45	-1	0
									-0.45	-3	0
									-0.5	-3	0
									-0.5	-1	0
									-0.5	1	0
									-0.45	1	0
									-0.45	-1	0
									-0.5	1	0
									-0.5	3	0
									-0.45	3	0
									-0.45	1	0
									-0.5	5	0
									-0.5	3	0
									-0.45	3	0
									-0.375	4.5	0
									-0.375	6.5	0
									-0.383333	7	0
									-0.4	7.5	0
									-0.45	7	0
									-0.475	-39.5	1.1
									-0.475	-41.5	1.1
									-0.425	-40.5	1.1
									-0.425	-39.5	1.1
									-0.45	-39	1.1
									-0.475	-38.5	0.45
									-0.475	-37.5	0.45
									-0.45	-37	0.45
									-0.425	-37.5	0.45
									-0.425	-38.5	0.45
									-0.45	-39	0.45
									-0.425	-35.5	0.5
									-0.475	-35.5	0.5
									-0.475	-36.5	0.5
									-0.45	-37	0.5
									-0.425	-36.5	0.5
									-0.425	-34.5	0.966667
									-0.425	-35.5	0.966667
									-0.475	-35.5	0.966667
									-0.475	-34.5	0.966667
									-0.425	-34.5	0.78
									-0.425	-33.5	0.78
									-0.475	-33.5	0.78
									-0.475	-34.5	0.78
									-0.475	-32.5	0.966667
									-0.475	-33.5	0.966667
									-0.425	-33.5	0.966667
									-0.425	-32.5	0.966667
									-0.475	-31.5	0.72
									-0.425	-31.5	0.72
									-0.425	-32.5	0.72
									-0.475	-32.5	0.72
									-0.475	-31.5	1
									-0.425	-31.5	1
									-0.425	-30.5	1
									-0.475	-30.5	1
									-0.475	-29.5	0.66
									-0.475	-30.5	0.66
									-0.425	-30.5	0.66
									-0.425	-29.5	0.66
									-0.425	-28.5	0.9
									-0.425	-29.5	0.9
									-0.475	-29.5	0.9
									-0.475	-28.5	0.9
									-0.425	-27.5	0.66
									-0.425	-28.5	0.66
									-0.475	-28.5	0.66
									-0.475	-27.5	0.66
									-0.475	-27.5	0.866667
									-0.425	-27.5	0.866667
									-0.425	-26.5	0.866667
									-0.475	-26.5	0.866667
									-0.425	-26.5	0.62
									-0.425	-25.5	0.62
									-0.475	-25.5	0.62
									-0.475	-26.5	0.62
									-0.425	-24.5	0.6
									-0.475	-24.5	0.6
									-0.475	-25.5	0.6
									-0.425	-25.5	0.6
									-0.425	-24.5	0.42
									-0.475	-24.5	0.42
									-0.475	-23.5	0.42
									-0.425	-23.5	0.42
									-0.475	-22.5	0.5
									-0.475	-23.5	0.5
									-0.425	-23.5	0.5
									-0.425	-22.5	0.5
									-0.425	-21.5	0.34
									-0.425	-22.5	0.34
									-0.475	-22.5	0.34
									-0.475	-21.5	0.34
									-0.425	-20.5	0.266667
									-0.425	-21.5	0.266667
									-0.475	-21.5	0.266667
									-0.475	-20.5	0.266667
									-0.475	-19.5	0.24
									-0.475	-20.5	0.24
									-0.425	-20.5	0.24
									-0.425	-19.5	0.24
									-0.425	-18.5	0.166667
									-0.475	-18.5	0.166667
									-0.475	-19.5	0.166667
									-0.425	-19.5	0.166667
									-0.425	-17.5	0.08
									-0.425	-18.5	0.08
									-0.475	-18.5	0.08
									-0.475	-17.5	0.08
									-0.475	-17.5	0.0666667
									-0.425	-17.5	0.0666667
									-0.425	-16.5	0.0666667
									-0.475	-16.5	0.0666667
									-0.425	-15.5	0.06
									-0.425	-16.5	0.06
									-0.475	-16.5	0.06
									-0.475	-15.5	0.06
									-0.475	-15.5	0.0666667
									-0.475	-14.5	0.0666667
									-0.425	-14.5	0.0666667
									-0.425	-15.5	0.0666667
									-0.425	-14.5	0.02
									-0.475	-14.5	0.02
									-0.475	-13.5	0.02
									-0.425	-13.5	0.02
									-0.425	-12.5	0
									-0.475	-12.5	0
									-0.475	-13.5	0
									-0.425	-13.5	0
									-0.425	-11.5	0.04
									-0.425	-12.5	0.04
									-0.475	-12.5	0.04
									-0.475	-11.5	0.04
									-0.45	-10	0
									-0.4	-11	0
									-0.425	-11.5	0
									-0.475	-11.5	0
									-0.475	-10.5	0
									-0.3	-48	1
									-0.35	-49	1
									-0.5	-49	1
									-0.5	-47.375	1
									-0.5	-47	1
									-0.3	-47	1
									-0.3	-45	1
									-0.5	-45	1
									-0.5	-47	1
									-0.3	-47	1
									-0.3	-43.5	1
									-0.3	-45	1
									-0.5	-45	1
									-0.5	-43.5	1
									-0.29375	-43	0.966667
									-0.3	-43.5	0.966667
									-0.5	-43.5	0.966667
									-0.5	-42.8333	0.966667
									-0.5	-42.5	0.966667
									-0.3	-42.5	0.966667
									-0.3	-42.5	1
									-0.5	-42.5	1
									-0.475	-41.5	1
									-0.325	-41.5	1
									-0.3	-42	1
									-0.375	-40.5	1
									-0.425	-40.5	1
									-0.475	-41.5	1
									-0.325	-41.5	1
									-0.375	-39.5	0.975
									-0.425	-39.5	0.975
									-0.425	-40.5	0.975
									-0.375	-40.5	0.975
									-0.375	-38.5	0.933333
									-0.425	-38.5	0.933333
									-0.45	-39	0.933333
									-0.425	-39.5	0.933333
									-0.375	-39.5	0.933333
									-0.35	-39	0.933333
									-0.375	-37.5	0.925
									-0.425	-37.5	0.925
									-0.425	-38.5	0.925
									-0.375	-38.5	0.925
									-0.35	-37	1
									-0.375	-36.5	1
									-0.425	-36.5	1
									-0.45	-37	1
									-0.425	-37.5	1
									-0.375	-37.5	1
									-0.425	-35.5	0.9125
									-0.425	-36.5	0.9125
									-0.375	-36.5	0.9125
									-0.375	-35.5	0.9125
									-0.375	-34.5	0.966667
									-0.375	-35.5	0.966667
									-0.425	-35.5	0.966667
									-0.425	-34.5	0.966667
									-0.425	-34.5	0.8625
									-0.425	-33.5	0.8625
									-0.375	-33.5	0.8625
									-0.375	-34.5	0.8625
									-0.425	-32.5	0.966667
									-0.425	-33.5	0.966667
									-0.375	-33.5	0.966667
									-0.375	-32.5	0.966667
									-0.425	-31.5	0.7375
									-0.375	-31.5	0.7375
									-0.375	-32.5	0.7375
									-0.425	-32.5	0.7375
									-0.425	-31.5	0.9
									-0.425	-30.5	0.9
									-0.375	-30.5	0.9
									-0.375	-31.5	0.9
									-0.375	-29.5	0.75
									-0.375	-30.5	0.75
									-0.425	-30.5	0.75
									-0.425	-29.5	0.75
									-0.425	-28.5	0.733333
									-0.425	-29.5	0.733333
									-0.375	-29.5	0.733333
									-0.375	-28.5	0.733333
									-0.425	-27.5	0.6375
									-0.375	-27.5	0.6375
									-0.375	-28.5	0.6375
									-0.425	-28.5	0.6375
									-0.425	-27.5	0.733333
									-0.375	-27.5	0.733333
									-0.375	-26.5	0.733333
									-0.425	-26.5	0.733333
									-0.425	-26.5	0.475
									-0.375	-26.5	0.475
									-0.375	-25.5	0.475
									-0.425	-25.5	0.475
									-0.375	-24.5	0.733333
									-0.375	-25.5	0.733333
									-0.425	-25.5	0.733333
									-0.425	-24.5	0.733333
									-0.375	-24.5	0.25
									-0.375	-23.5	0.25
									-0.425	-23.5	0.25
									-0.425	-24.5	0.25
									-0.425	-23.5	0.466667
									-0.375	-23.5	0.466667
									-0.375	-22.5	0.466667
									-0.425	-22.5	0.466667
									-0.425	-21.5	0.175
									-0.375	-21.5	0.175
									-0.375	-22.5	0.175
									-0.425	-22.5	0.175
									-0.425	-20.5	0.2
									-0.375	-20.5	0.2
									-0.375	-21.5	0.2
									-0.425	-21.5	0.2
									-0.425	-20.5	0.1
									-0.375	-20.5	0.1
									-0.375	-19.5	0.1
									-0.425	-19.5	0.1
									-0.425	-18.5	0.1
									-0.425	-19.5	0.1
									-0.375	-19.5	0.1
									-0.375	-18.5	0.1
									-0.425	-18.5	0.1
									-0.375	-18.5	0.1
									-0.375	-17.5	0.1
									-0.425	-17.5	0.1
									-0.375	-16.5	0.133333
									-0.425	-16.5	0.133333
									-0.425	-17.5	0.133333
									-0.375	-17.5	0.133333
									-0.375	-15.5	0.04
									-0.425	-15.5	0.04
									-0.425	-16.5	0.04
									-0.375	-16.5	0.04
									-0.375	-15.5	0.1
									-0.425	-15.5	0.1
									-0.425	-14.5	0.1
									-0.375	-14.5	0.1
									-0.35	-15	0.1
									-0.425	-13.5	0.04
									-0.375	-13.5	0.04
									-0.375	-14.5	0.04
									-0.425	-14.5	0.04
									-0.35	-13	0
									-0.375	-13.5	0
									-0.425	-13.5	0
									-0.425	-12.5	0
									-0.375	-12.5	0
									-0.375	-12.5	0
									-0.425	-12.5	0
									-0.425	-11.5	0
									-0.4	-11	0
									-0.375	-11	0
									-0.375	-11	0
									-0.375	-9	0
									-0.4375	-9	0
									-0.45	-9.5	0
									-0.45	-10	0
									-0.4	-11	0
									-0.4375	-7	0.1
									-0.45	-7.5	0.1
									-0.45	-8.5	0.1
									-0.4375	-9	0.1
									-0.375	-9	0.1
									-0.375	-7	0.1
									-0.375	-5	0
									-0.375	-7	0
									-0.4375	-7	0
									-0.45	-6.5	0
									-0.45	-5	0
									-0.375	-5	0
									-0.375	-3	0
									-0.45	-3	0
									-0.45	-5	0
									-0.45	-1	0
									-0.45	-3	0
									-0.375	-3	0
									-0.375	-1	0
									-0.45	-1	0
									-0.45	1	0
									-0.35	1	0
									-0.35	-0.75	0
									-0.375	-1	0
									-0.325	3	0
									-0.375	4.5	0
									-0.45	3	0
									-0.45	1	0
									-0.35	1	0
									-0.325	1.5	0
									-0.35	-39	0.65
									-0.375	-39.5	0.65
									-0.375	-40.5	0.65
									-0.325	-41.5	0.65
									-0.325	-39	0.65
									-0.325	-37	0.55
									-0.325	-39	0.55
									-0.35	-39	0.55
									-0.375	-38.5	0.55
									-0.375	-37.5	0.55
									-0.35	-37	0.55
									-0.35	-37	0.5
									-0.375	-36.5	0.5
									-0.375	-35.5	0.5
									-0.325	-35.5	0.5
									-0.325	-37	0.5
									-0.375	-34.5	0.966667
									-0.325	-34.5	0.966667
									-0.3	-35	0.966667
									-0.325	-35.5	0.966667
									-0.375	-35.5	0.966667
									-0.375	-34.5	0.8
									-0.325	-34.5	0.8
									-0.325	-33.5	0.8
									-0.375	-33.5	0.8
									-0.325	-32.5	0.966667
									-0.3	-33	0.966667
									-0.325	-33.5	0.966667
									-0.375	-33.5	0.966667
									-0.375	-32.5	0.966667
									-0.325	-32.5	0.78
									-0.375	-32.5	0.78
									-0.375	-31.5	0.78
									-0.325	-31.5	0.78
									-0.325	-30.5	0.866667
									-0.375	-30.5	0.866667
									-0.375	-31.5	0.866667
									-0.325	-31.5	0.866667
									-0.3	-31	0.866667
									-0.325	-29.5	0.58
									-0.325	-30.5	0.58
									-0.375	-30.5	0.58
									-0.375	-29.5	0.58
									-0.325	-28.5	0.833333
									-0.375	-28.5	0.833333
									-0.375	-29.5	0.833333
									-0.325	-29.5	0.833333
									-0.3	-29	0.833333
									-0.325	-27.5	0.48
									-0.375	-27.5	0.48
									-0.375	-28.5	0.48
									-0.325	-28.5	0.48
									-0.325	-27.5	0.9
									-0.375	-27.5	0.9
									-0.375	-26.5	0.9
									-0.325	-26.5	0.9
									-0.3	-27	0.9
									-0.325	-25.5	0.44
									-0.375	-25.5	0.44
									-0.375	-26.5	0.44
									-0.325	-26.5	0.44
									-0.325	-25.5	0.6
									-0.375	-25.5	0.6
									-0.375	-24.5	0.6
									-0.325	-24.5	0.6
									-0.3	-25	0.6
									-0.375	-24.5	0.44
									-0.375	-23.5	0.44
									-0.325	-23.5	0.44
									-0.325	-24.5	0.44
									-0.325	-22.5	0.233333
									-0.375	-22.5	0.233333
									-0.375	-23.5	0.233333
									-0.325	-23.5	0.233333
									-0.3	-23	0.233333
									-0.325	-22.5	0.18
									-0.375	-22.5	0.18
									-0.375	-21.5	0.18
									-0.325	-21.5	0.18
									-0.325	-20.5	0.3
									-0.375	-20.5	0.3
									-0.375	-21.5	0.3
									-0.325	-21.5	0.3
									-0.3	-21	0.3
									-0.325	-20.5	0.18
									-0.375	-20.5	0.18
									-0.375	-19.5	0.18
									-0.325	-19.5	0.18
									-0.325	-19.5	0.133333
									-0.3	-19	0.133333
									-0.325	-18.5	0.133333
									-0.375	-18.5	0.133333
									-0.375	-19.5	0.133333
									-0.325	-17.5	0.02
									-0.325	-18.5	0.02
									-0.375	-18.5	0.02
									-0.375	-17.5	0.02
									-0.325	-16.5	0.0333333
									-0.375	-16.5	0.0333333
									-0.375	-17.5	0.0333333
									-0.325	-17.5	0.0333333
									-0.3	-17	0.0333333
									-0.325	-16.5	0.08
									-0.375	-16.5	0.08
									-0.375	-15.5	0.08
									-0.35	-15	0.08
									-0.325	-15	0.08
									-0.35	-15	0
									-0.375	-14.5	0
									-0.375	-13.5	0
									-0.35	-13	0
									-0.325	-13	0
									-0.325	-15	0
									-0.35	-13	0
									-0.375	-12.5	0
									-0.375	-11	0
									-0.325	-11	0
									-0.325	-13	0
									-0.375	-11	0.05
									-0.375	-9	0.05
									-0.325	-9	0.05
									-0.325	-11	0.05
									-0.375	-7	0
									-0.375	-9	0
									-0.325	-9	0
									-0.325	-7	0
									-0.325	-7	0
									-0.325	-5	0
									-0.375	-5	0
									-0.375	-7	0
									-0.325	-5	0
									-0.325	-3	0
									-0.375	-3	0
									-0.375	-5	0
									-0.325	-1	0
									-0.325	-3	0
									-0.375	-3	0
									-0.375	-1	0
									-0.35	-0.75	0
									-0.275	-39	0.875
									-0.275	-41.5	0.875
									-0.3	-42	0.875
									-0.325	-41.5	0.875
									-0.325	-39	0.875
									-0.325	-37	0.725
									-0.325	-39	0.725
									-0.275	-39	0.725
									-0.275	-37	0.725
									-0.325	-35.5	0.75
									-0.325	-37	0.75
									-0.275	-37	0.75
									-0.275	-35.5	0.75
									-0.3	-35	0.75
									-0.275	-34.5	0.725
									-0.3	-35	0.725
									-0.325	-34.5	0.725
									-0.325	-33.5	0.725
									-0.3	-33	0.725
									-0.275	-33.5	0.725
									-0.275	-31.5	0.55
									-0.3	-31	0.55
									-0.325	-31.5	0.55
									-0.325	-32.5	0.55
									-0.3	-33	0.55
									-0.275	-32.5	0.55
									-0.325	-29.5	0.6
									-0.3	-29	0.6
									-0.275	-29.5	0.6
									-0.275	-30.5	0.6
									-0.3	-31	0.6
									-0.325	-30.5	0.6
									-0.275	-27.5	0.475
									-0.275	-28.5	0.475
									-0.3	-29	0.475
									-0.325	-28.5	0.475
									-0.325	-27.5	0.475
									-0.3	-27	0.475
									-0.275	-25.5	0.275
									-0.3	-25	0.275
									-0.325	-25.5	0.275
									-0.325	-26.5	0.275
									-0.3	-27	0.275
									-0.275	-26.5	0.275
									-0.275	-24.5	0.275
									-0.3	-25	0.275
									-0.325	-24.5	0.275
									-0.325	-23.5	0.275
									-0.3	-23	0.275
									-0.275	-23.5	0.275
									-0.275	-22.5	0.225
									-0.275	-21.5	0.225
									-0.3	-21	0.225
									-0.325	-21.5	0.225
									-0.325	-22.5	0.225
									-0.3	-23	0.225
									-0.275	-20.5	0.075
									-0.275	-19.5	0.075
									-0.3	-19	0.075
									-0.325	-19.5	0.075
									-0.325	-20.5	0.075
									-0.3	-21	0.075
									-0.3	-17	0.025
									-0.325	-17.5	0.025
									-0.325	-18.5	0.025
									-0.3	-19	0.025
									-0.275	-18.5	0.025
									-0.275	-17.5	0.025
									-0.325	-15	0.05
									-0.325	-16.5	0.05
									-0.3	-17	0.05
									-0.275	-16.5	0.05
									-0.275	-15.5	0.05
									-0.3	-15	0.05
									-0.3	-15	0.1
									-0.275	-14.5	0.1
									-0.275	-13	0.1
									-0.325	-13	0.1
									-0.325	-15	0.1
									-0.325	-11	0
									-0.325	-13	0
									-0.275	-13	0
									-0.275	-11	0
									-0.325	-11	0
									-0.275	-11	0
									-0.275	-9	0
									-0.325	-9	0
									-0.275	-7	0
									-0.275	-9	0
									-0.325	-9	0
									-0.325	-7	0
									-0.275	-5	0
									-0.275	-7	0
									-0.325	-7	0
									-0.325	-5	0
									-0.275	-5	0
									-0.275	-3	0
									-0.325	-3	0
									-0.325	-5	0
									-0.275	-3	0
									-0.325	-3	0
									-0.325	-1	0
									-0.275	-1	0
									-0.275	1	0
									-0.325	1.5	0
									-0.35	1	0
									-0.35	-0.75	0
									-0.325	-1	0
									-0.275	-1	0
									-0.25	-39	0.75
									-0.275	-39	0.75
									-0.275	-41.5	0.75
									-0.225	-41	0.75
									-0.225	-39.5	0.75
									-0.225	-37.5	0.55
									-0.25	-37	0.55
									-0.275	-37	0.55
									-0.275	-39	0.55
									-0.25	-39	0.55
									-0.225	-38.5	0.55
									-0.275	-35.5	0.5
									-0.225	-35.5	0.5
									-0.225	-36.5	0.5
									-0.25	-37	0.5
									-0.275	-37	0.5
									-0.275	-35.5	0.8
									-0.3	-35	0.8
									-0.275	-34.5	0.8
									-0.225	-34.5	0.8
									-0.225	-35.5	0.8
									-0.225	-33.5	0.48
									-0.275	-33.5	0.48
									-0.275	-34.5	0.48
									-0.225	-34.5	0.48
									-0.275	-32.5	0.633333
									-0.3	-33	0.633333
									-0.275	-33.5	0.633333
									-0.225	-33.5	0.633333
									-0.225	-32.5	0.633333
									-0.275	-31.5	0.54
									-0.275	-32.5	0.54
									-0.225	-32.5	0.54
									-0.225	-31.5	0.54
									-0.225	-30.5	0.6
									-0.225	-31.5	0.6
									-0.275	-31.5	0.6
									-0.3	-31	0.6
									-0.275	-30.5	0.6
									-0.225	-30.5	0.64
									-0.225	-29.5	0.64
									-0.275	-29.5	0.64
									-0.275	-30.5	0.64
									-0.275	-28.5	0.633333
									-0.225	-28.5	0.633333
									-0.225	-29.5	0.633333
									-0.275	-29.5	0.633333
									-0.3	-29	0.633333
									-0.275	-27.5	0.38
									-0.225	-27.5	0.38
									-0.225	-28.5	0.38
									-0.275	-28.5	0.38
									-0.225	-26.5	0.433333
									-0.225	-27.5	0.433333
									-0.275	-27.5	0.433333
									-0.3	-27	0.433333
									-0.275	-26.5	0.433333
									-0.225	-25.5	0.36
									-0.275	-25.5	0.36
									-0.275	-26.5	0.36
									-0.225	-26.5	0.36
									-0.225	-25.5	0.433333
									-0.275	-25.5	0.433333
									-0.3	-25	0.433333
									-0.275	-24.5	0.433333
									-0.225	-24.5	0.433333
									-0.225	-24.5	0.28
									-0.275	-24.5	0.28
									-0.275	-23.5	0.28
									-0.225	-23.5	0.28
									-0.225	-23.5	0.1
									-0.225	-22.5	0.1
									-0.275	-22.5	0.1
									-0.3	-23	0.1
									-0.275	-23.5	0.1
									-0.225	-21.5	0.14
									-0.275	-21.5	0.14
									-0.275	-22.5	0.14
									-0.225	-22.5	0.14
									-0.225	-21.5	0.0666667
									-0.225	-20.5	0.0666667
									-0.275	-20.5	0.0666667
									-0.3	-21	0.0666667
									-0.275	-21.5	0.0666667
									-0.275	-20.5	0.1
									-0.225	-20.5	0.1
									-0.225	-19.5	0.1
									-0.275	-19.5	0.1
									-0.275	-19.5	0.0333333
									-0.3	-19	0.0333333
									-0.275	-18.5	0.0333333
									-0.225	-18.5	0.0333333
									-0.225	-19.5	0.0333333
									-0.275	-17.5	0.04
									-0.275	-18.5	0.04
									-0.225	-18.5	0.04
									-0.225	-17.5	0.04
									-0.275	-16.5	0.0333333
									-0.225	-16.5	0.0333333
									-0.225	-17.5	0.0333333
									-0.275	-17.5	0.0333333
									-0.3	-17	0.0333333
									-0.275	-15.5	0
									-0.225	-15.5	0
									-0.225	-16.5	0
									-0.275	-16.5	0
									-0.3	-15	0
									-0.275	-14.5	0
									-0.225	-14.5	0
									-0.225	-15.5	0
									-0.275	-15.5	0
									-0.275	-14.5	0.04
									-0.275	-13	0.04
									-0.25	-13	0.04
									-0.225	-13.5	0.04
									-0.225	-14.5	0.04
									-0.225	-12.5	0
									-0.225	-11.5	0
									-0.25	-11	0
									-0.275	-11	0
									-0.275	-13	0
									-0.25	-13	0
									-0.25	-9	0
									-0.275	-9	0
									-0.275	-11	0
									-0.25	-11	0
									-0.225	-10.5	0
									-0.225	-9.5	0
									-0.25	-7	0
									-0.225	-7.5	0
									-0.225	-8.5	0
									-0.25	-9	0
									-0.275	-9	0
									-0.275	-7	0
									-0.25	-5	0
									-0.225	-5.5	0
									-0.225	-6.5	0
									-0.25	-7	0
									-0.275	-7	0
									-0.275	-5	0
									-0.275	-5	0
									-0.275	-3	0
									-0.25	-3	0
									-0.225	-3.5	0
									-0.225	-4.5	0
									-0.25	-5	0
									-0.25	-3	0
									-0.225	-2.5	0
									-0.225	-1.5	0
									-0.25	-1	0
									-0.275	-1	0
									-0.275	-3	0
									-0.225	-0.5	0
									-0.225	1	0
									-0.275	1	0
									-0.275	-1	0
									-0.25	-1	0
									-0.225	3	0
									-0.325	3	0
									-0.325	1.5	0
									-0.275	1	0
									-0.225	1	0
									-0.225	5	0
									-0.375	6.5	0
									-0.375	4.5	0
									-0.325	3	0
									-0.225	3	0
									-0.3	-48	0.75
									-0.3	-47	0.75
									-0.15	-47	0.75
									-0.15	-49	0.75
									-0.25	-49	0.75
									-0.15	-45	0.8
									-0.3	-45	0.8
									-0.3	-47	0.8
									-0.15	-47	0.8
									-0.15	-43	0.85
									-0.15	-45	0.85
									-0.3	-45	0.85
									-0.3	-43.5	0.85
									-0.29375	-43	0.85
									-0.15	-41.25	0.75
									-0.15	-43	0.75
									-0.29375	-43	0.75
									-0.3	-42.5	0.75
									-0.3	-42	0.75
									-0.275	-41.5	0.75
									-0.225	-41	0.75
[truncated: 2,179 more rows]

## Sheet: panel B
	Bottom panel								Top panel
	ITD function		IID function		Combined function				The figure is generated using the MATLAB function patch to plot filled polygons with the following x and y coordinates, and coloring each polygon according to the spike rate (see colorbar)
	ITD (ms)	Spikes/click	IID (dB SPL)	Spikes/click	ITD (ms)	Spikes/click			Patch x coordinates	Patch Y coordinates	Spike rate/click pair
	-1.2	0.9	-40	1	-0.2	1			-1.2	5	0.9
	-1.1	0.95	-32	0.85	-0.1	0			-1.2	5	0.9
	-1	0.9	-30	0.65	0	0.0234			-1.2	-9	0.9
	-0.9	0.85	-28	0.9	0.2	0			-1.2	-7.5	0.9
	-0.8	0.85	-26	0.9					-1.2	-7.3	0.9
	-0.7	0.65	-24	0.55
	-0.6	0.5	-22	0.7					-1.2	5	0.9
	-0.5	0.2	-20	0.55					-1.2	-7.3	0.9
	-0.4	0.1	-18	0.2					-1.2	-4.9	0.9
	-0.3	0	-16	0.1333					-1.2	4.9	0.9
	-0.2	0	-14	0.3
	-0.1	0	-12	0.1					-1.2	3.3	1
	0	0.0234	-10	0.05					-1.2	4.9	1
	0.1	0.2	-8	0.0667					-1.2	-4.9	1
	0.2	0.4	-6	0.2					-1.2	-3.3	1
	0.3	0.5	-5	0
	0.4	0.55	-4	0.2					-1.2	3.3	0.8
	0.5	0.65	-2	0.2					-1.2	-3.3	0.8
	0.6	0.7	0	0.0234					-1.2	-2.5	0.8
	0.7	0.7	2	0.1					-1.2	2.5	0.8
	0.8	0.95	4	0.2
	0.9	0.95	5	0.3					-1.2	-7.5	1
	1	0.85	6	0.05					-1.2	-7.5	1
	1.1	0.95	8	0.1					-1.2	-9	1
	1.2	0.9	10	0.3					-1.2	-25	1
			12	0					-1.2	-15.4	1
			16	0
			18	0					-1.2	-3.3	1
			20	0					-1.2	-4.9	1
			24	0					-1.2	-7.3	1
			30	0					-1.2	-7.5	1
			32	0					-1.2	-7.5	1
			40	0					-1.2	-2.5	1
									-1.2	-2.5	1
									-1.2	2.5	0.85
									-1.2	2.5	0.85
									-1.2	-2.5	0.85
									-1.2	-2.5	0.85
									-1.2	3.3	1
									-1.2	4.9	1
									-1.2	5	1
									-1.2	5	1
									-1.2	5	1
									-1.2	5	1
									-1.2	2.5	1
									-1.2	2.5	1
									-1.2	-15	1
									-1.2	-15.4	1
									-1.2	-7.5	1
									-1.2	-7.5	1
									-1.2	-7.5	1
									-1.2	-2.5	1
									-1.2	-2.5	1
									-1.2	-7.5	1
									-1.2	-2.5	0.85
									-1.2	2.5	0.85
									-1.2	2.5	0.85
									-1.2	-2.5	0.85
									-1.2	2.5	1
									-1.2	5	1
									-1.2	5	1
									-1.2	2.5	1
									-1.2	5	0.1
									-1.2	5	0.1
									-1.2	5	0.1
									-1.2	5	0.1
									-1.2	-15	1
									-1.2	-7.5	1
									-1.2	-7.5	1
									-1.2	-15	1
									-1.2	-2.5	1
									-1.2	-7.5	1
									-1.2	-7.5	1
									-1.2	-2.5	1
									-1.2	2.5	0.85
									-1.2	-2.5	0.85
									-1.2	-2.5	0.85
									-1.2	2.5	0.85
									-1.2	2.5	1
									-1.2	2.5	1
									-1.2	5	1
									-1.2	5	1
									-1.2	5	0.2
									-1.2	5	0.2
									-1.2	5	0.2
									-1.2	5	0.2
									-1.15	-15	1
									-1.15	-25	1
									-1.2	-25	1
									-1.2	-15	1
									-1.2	-7.5	1
									-1.2	-15	1
									-1.15	-15	1
									-1.15	-7.5	1
									-1.15	-7.5	1
									-1.15	-2.5	1
									-1.2	-2.5	1
									-1.2	-7.5	1
									-1.2	-2.5	0.9
									-1.2	2.5	0.9
									-1.15	2.5	0.9
									-1.15	-2.5	0.9
									-1.2	5	1
									-1.15	5	1
									-1.15	2.5	1
									-1.2	2.5	1
									-1.2	5	0.1
									-1.2	5	0.1
									-1.15	5	0.1
									-1.15	5	0.1
									-1.15	-15	1
									-1.15	-25	1
									-1.05	-25	1
									-1.05	-15	1
									-1.15	-7.5	1
									-1.05	-7.5	1
									-1.05	-15	1
									-1.15	-15	1
									-1.15	-2.5	1
									-1.15	-7.5	1
									-1.05	-7.5	1
									-1.05	-2.5	1
									-1.15	-2.5	0.95
									-1.15	2.5	0.95
									-1.05	2.5	0.95
									-1.05	-2.5	0.95
									-1.15	2.5	1
									-1.05	2.5	1
									-1.05	5	1
									-1.15	5	1
									-1.15	5	0
									-1.15	5	0
									-1.05	5	0
									-1.05	5	0
									-0.95	-25	1
									-1.05	-25	1
									-1.05	-15	1
									-0.95	-15	1
									-1.05	-7.5	1
									-1.05	-15	1
									-0.95	-15	1
									-0.95	-7.5	1
									-1.05	-2.5	1
									-0.95	-2.5	1
									-0.95	-7.5	1
									-1.05	-7.5	1
									-1.05	-2.5	0.9
									-1.05	2.5	0.9
									-0.95	2.5	0.9
									-0.95	-2.5	0.9
									-0.95	2.5	1
									-1.05	2.5	1
									-1.05	5	1
									-0.95	5	1
									-1.05	5	0.1
									-0.95	5	0.1
									-0.95	5	0.1
									-1.05	5	0.1
									-0.85	-25	1
									-0.85	-15	1
									-0.95	-15	1
									-0.95	-25	1
									-0.85	-7.5	1
									-0.95	-7.5	1
									-0.95	-15	1
									-0.85	-15	1
									-0.85	-2.5	1
									-0.95	-2.5	1
									-0.95	-7.5	1
									-0.85	-7.5	1
									-0.85	-2.5	0.85
									-0.95	-2.5	0.85
									-0.95	2.5	0.85
									-0.85	2.5	0.85
									-0.95	5	1
									-0.95	2.5	1
									-0.85	2.5	1
									-0.85	5	1
									-0.85	5	0
									-0.95	5	0
									-0.95	5	0
									-0.85	5	0
									-0.75	-25	1
									-0.775	-25	1
									-0.85	-25	1
									-0.85	-15	1
									-0.75	-15	1
									-0.85	-7.5	1
									-0.75	-7.5	1
									-0.75	-15	1
									-0.85	-15	1
									-0.75	-2.5	1
									-0.85	-2.5	1
									-0.85	-7.5	1
									-0.75	-7.5	1
									-0.75	-2.5	0.85
									-0.75	2.5	0.85
									-0.85	2.5	0.85
									-0.85	-2.5	0.85
									-0.75	2.5	1
									-0.75	5	1
									-0.85	5	1
									-0.85	2.5	1
									-0.75	5	0
									-0.75	5	0
									-0.775	5	0
									-0.85	5	0
									-0.85	5	0
									-0.65	-25	1
									-0.65	-15	1
									-0.75	-15	1
									-0.75	-25	1
									-0.65	-15	1
									-0.65	-7.5	1
									-0.75	-7.5	1
									-0.75	-15	1
									-0.75	-2.5	1
									-0.75	-7.5	1
									-0.65	-7.5	1
									-0.65	-2.5	1
									-0.75	-2.5	0.65
									-0.75	2.5	0.65
									-0.65	2.5	0.65
									-0.65	-2.5	0.65
									-0.75	2.5	1
									-0.75	5	1
									-0.65	5	1
									-0.65	2.5	1
									-0.75	5	0
									-0.65	5	0
									-0.65	5	0
									-0.75	5	0
									-0.65	-15	1
									-0.65	-25	1
									-0.55	-25	1
									-0.55	-15	1
									-0.65	-15	1
									-0.55	-15	1
									-0.55	-7.5	1
									-0.65	-7.5	1
									-0.55	-7.5	1
									-0.65	-7.5	1
									-0.65	-2.5	1
									-0.55	-2.5	1
									-0.55	2.5	0.5
									-0.55	-2.5	0.5
									-0.65	-2.5	0.5
									-0.65	2.5	0.5
									-0.65	2.5	1
									-0.65	5	1
									-0.55	5	1
									-0.55	2.5	1
									-0.65	5	0
									-0.65	5	0
									-0.55	5	0
									-0.55	5	0
									-0.55	-15	1
									-0.55	-25	1
									-0.45	-25	1
									-0.45	-15	1
									-0.45	-7.5	1
									-0.45	-15	1
									-0.55	-15	1
									-0.55	-7.5	1
									-0.45	-7.5	1
									-0.45	-2.5	1
									-0.55	-2.5	1
									-0.55	-7.5	1
									-0.45	-2.5	0.2
									-0.45	2.5	0.2
									-0.55	2.5	0.2
									-0.55	-2.5	0.2
									-0.45	5	0.5
									-0.55	5	0.5
									-0.55	2.5	0.5
									-0.45	2.5	0.5
									-0.45	5	0
									-0.55	5	0
									-0.55	5	0
									-0.45	5	0
									-0.35	-15	1
									-0.35	-25	1
									-0.45	-25	1
									-0.45	-15	1
									-0.45	-7.5	1
									-0.45	-15	1
									-0.35	-15	1
									-0.35	-7.5	1
									-0.45	-7.5	0.8
									-0.45	-2.5	0.8
									-0.35	-2.5	0.8
									-0.35	-7.5	0.8
									-0.45	-2.5	0.1
									-0.45	2.5	0.1
									-0.35	2.5	0.1
									-0.35	-2.5	0.1
									-0.35	5	0
									-0.35	2.5	0
									-0.45	2.5	0
									-0.45	5	0
									-0.375	5	0
									-0.35	5	0
									-0.35	5	0
									-0.45	5	0
									-0.45	5	0
									-0.375	5	0
									-0.35	-15	1
									-0.35	-25	1
									-0.25	-25	1
									-0.25	-15	1
									-0.35	-7.5	0.7
									-0.35	-15	0.7
									-0.25	-15	0.7
									-0.25	-7.5	0.7
									-0.35	-7.5	0
									-0.35	-2.5	0
									-0.25	-2.5	0
									-0.25	-7.5	0
									-0.25	-2.5	0
									-0.25	2.5	0
									-0.35	2.5	0
									-0.35	-2.5	0
									-0.295833	5	0
									-0.25	5	0
									-0.25	2.5	0
									-0.35	2.5	0
									-0.35	5	0
									-0.283333	5	0
									-0.25	5	0
									-0.25	5	0
									-0.316667	5	0
									-0.35	5	0
									-0.35	5	0
									-0.15	-17	1
									-0.15	-23	1
									-0.25	-25	1
									-0.25	-15	1
									-0.15	-13	0.2
									-0.25	-15	0.2
									-0.25	-7.5	0.2
									-0.15	-7.5	0.2
									-0.25	-2.5	0
									-0.25	-7.5	0
									-0.15	-7.5	0
									-0.15	-2.5	0
									-0.15	-2.5	0
									-0.15	2.5	0
									-0.25	2.5	0
									-0.25	-2.5	0
									-0.19375	5	0
									-0.25	5	0
									-0.25	2.5	0
									-0.15	2.5	0
									-0.15	5	0
									-0.15	5	0
									-0.15	5	0
									-0.25	5	0
									-0.25	5	0
									-0.15	-17	0.9
									-0.15	-23	0.9
									-0.05	-21	0.9
									-0.05	-19	0.9
									-0.125	-7.5	0
									-0.15	-7.5	0
									-0.15	-13	0
									-0.05	-11	0
									-0.05	-9	0
									-0.05	-5.5	0.1
									-0.0875	-7	0.1
									-0.125	-7.5	0.1
									-0.15	-7.5	0.1
									-0.15	-2.5	0.1
									-0.125	-2.5	0.1
									-0.0875	-3	0.1
									-0.05	-4.5	0.1
									-0.05	-1	0
									-0.05	1	0
									-0.125	2.5	0
									-0.15	2.5	0
									-0.15	-2.5	0
									-0.125	-2.5	0
									-0.15	5	0
									-0.15	2.5	0
									-0.125	2.5	0
									-0.0875	3	0
									-0.05	4.5	0
									-0.05	5	0
									-0.0875	5	0
									-0.15	5	0
									-0.15	5	0
									-0.05	5	0
									-0.05	5	0
									-0.65	-25	0.85
									-0.55	-25	0.85
									0.55	-25	0.85
									0.65	-25	0.85
									0.75	-25	0.85
									0.775	-25	0.85
									-0.775	-25	0.85
									-0.75	-25	0.85
									0.45	-25	0.65
									0.55	-25	0.65
									-0.55	-25	0.65
									-0.45	-25	0.65
									-0.35	-25	0.9
									0.35	-25	0.9
									0.45	-25	0.9
									-0.45	-25	0.9
									-0.25	-25	0.9
									0.25	-25	0.9
									0.35	-25	0.9
									-0.35	-25	0.9
									-0.15	-23	0.55
									0.15	-23	0.55
									0.25	-25	0.55
									-0.25	-25	0.55
									-0.15	-23	0.7
									0.15	-23	0.7
									0.05	-21	0.7
									-0.05	-21	0.7
									0.05	-19	0.55
									0.05	-21	0.55
									-0.05	-21	0.55
									-0.05	-19	0.55
									0.15	-17	0.2
									0.05	-19	0.2
									-0.05	-19	0.2
									-0.15	-17	0.2
									0.15	-17	0.133333
									-0.15	-17	0.133333
									-0.25	-15	0.133333
									0.25	-15	0.133333
									0.25	-15	0.3
									-0.25	-15	0.3
									-0.15	-13	0.3
									0.15	-13	0.3
									0.15	-13	0.1
									-0.15	-13	0.1
									-0.05	-11	0.1
									0.05	-11	0.1
									0.05	-11	0.05
									0.05	-9	0.05
									-0.05	-9	0.05
									-0.05	-11	0.05
									-0.0875	-7	0.0666667
									-0.125	-7.5	0.0666667
									-0.05	-9	0.0666667
									0.05	-9	0.0666667
									0.125	-7.5	0.0666667
									0.0875	-7	0.0666667
									-0.05	-5.5	0.2
									-0.0875	-7	0.2
									0.0875	-7	0.2
									0.05	-5.5	0.2
									-0.05	-5.5	0
									0.05	-5.5	0
									0.05	-4.5	0
									-0.05	-4.5	0
									-0.05	-4.5	0.2
									-0.0875	-3	0.2
									0.0875	-3	0.2
									0.05	-4.5	0.2
									0.0875	-3	0.2
									-0.0875	-3	0.2
									-0.125	-2.5	0.2
									-0.05	-1	0.2
									0.05	-1	0.2
									0.125	-2.5	0.2
									0.05	-1	0.0234043
									0.05	1	0.0234043
									-0.05	1	0.0234043
									-0.05	-1	0.0234043
									0.125	2.5	0.1
									0.05	1	0.1
									-0.05	1	0.1
									-0.125	2.5	0.1
									-0.0875	3	0.1
									0.0875	3	0.1
									0.0875	3	0.2
									-0.0875	3	0.2
									-0.05	4.5	0.2
									0.05	4.5	0.2
									0.05	4.5	0.3
									-0.05	4.5	0.3
									-0.05	5	0.3
									0.05	5	0.3
									0.05	5	0.05
									-0.05	5	0.05
									-0.0875	5	0.05
									0.0875	5	0.05
									0.0875	5	0.1
									-0.0875	5	0.1
									-0.15	5	0.1
									-0.19375	5	0.1
									0.19375	5	0.1
									0.15	5	0.1
									0.295833	5	0.3
									0.25	5	0.3
									0.19375	5	0.3
									-0.19375	5	0.3
									-0.25	5	0.3
									-0.295833	5	0.3
									0.35	5	0
									0.375	5	0
									0.35	5	0
									0.283333	5	0
									-0.283333	5	0
									-0.35	5	0
									-0.375	5	0
									-0.35	5	0
									-0.295833	5	0
									0.295833	5	0
									0.283333	5	0
									0.25	5	0
									0.15	5	0
									-0.15	5	0
									-0.25	5	0
									-0.283333	5	0
									0.05	5	0
									-0.05	5	0
									-0.15	5	0
									0.15	5	0
									0.05	5	0
									-0.05	5	0
									-0.05	5	0
									0.05	5	0
									0.15	5	0
									0.25	5	0
									0.316667	5	0
									-0.316667	5	0
									-0.25	5	0
									-0.15	5	0
									-0.05	5	0
									0.05	5	0
									-0.35	5	0
									-0.316667	5	0
									0.316667	5	0
									0.35	5	0
									0.45	5	0
									0.55	5	0
									-0.55	5	0
									-0.45	5	0
									-0.75	5	0
									-0.65	5	0
									-0.55	5	0
									0.55	5	0
									0.65	5	0
									0.75	5	0
									0.775	5	0
									-0.775	5	0
									0.15	-17	0.9
									0.15	-23	0.9
									0.05	-21	0.9
									0.05	-19	0.9
									0.05	-11	0.3
									0.15	-13	0.3
									0.15	-7.5	0.3
									0.125	-7.5	0.3
									0.05	-9	0.3
									0.05	-5.5	0.3
									0.0875	-7	0.3
									0.125	-7.5	0.3
									0.15	-7.5	0.3
									0.15	-2.5	0.3
									0.125	-2.5	0.3
									0.0875	-3	0.3
									0.05	-4.5	0.3
									0.125	-2.5	0.2
									0.15	-2.5	0.2
									0.15	2.5	0.2
									0.125	2.5	0.2
									0.05	1	0.2
									0.05	-1	0.2
									0.125	2.5	0.5
									0.0875	3	0.5
									0.05	4.5	0.5
									0.05	5	0.5
									0.0875	5	0.5
									0.15	5	0.5
									0.15	2.5	0.5
									0.15	5	0
									0.15	5	0
									0.05	5	0
									0.05	5	0
									0.15	-17	0.8
									0.25	-15	0.8
									0.25	-25	0.8
									0.15	-23	0.8
									0.15	-13	0.6
									0.25	-15	0.6
									0.25	-7.5	0.6
									0.15	-7.5	0.6
									0.25	-7.5	0.6
									0.25	-2.5	0.6
									0.15	-2.5	0.6
									0.15	-7.5	0.6
									0.25	2.5	0.4
									0.25	-2.5	0.4
									0.15	-2.5	0.4
									0.15	2.5	0.4
									0.15	5	0.8
									0.15	2.5	0.8
									0.25	2.5	0.8
									0.25	5	0.8
									0.19375	5	0.8
									0.15	5	0
									0.15	5	0
									0.25	5	0
									0.25	5	0
									0.35	-15	1
									0.25	-15	1
									0.25	-25	1
									0.35	-25	1
									0.35	-15	0.9
									0.25	-15	0.9
									0.25	-7.5	0.9
									0.35	-7.5	0.9
									0.35	-2.5	0.8
									0.25	-2.5	0.8
									0.25	-7.5	0.8
									0.35	-7.5	0.8
									0.35	2.5	0.5
									0.35	-2.5	0.5
									0.25	-2.5	0.5
									0.25	2.5	0.5
									0.35	5	0.9
									0.35	2.5	0.9
									0.25	2.5	0.9
									0.25	5	0.9
									0.295833	5	0.9
									0.35	5	0
									0.35	5	0
									0.316667	5	0
									0.25	5	0
									0.25	5	0
									0.283333	5	0
									0.45	-15	1
									0.45	-25	1
									0.35	-25	1
									0.35	-15	1
									0.45	-7.5	1
									0.45	-15	1
									0.35	-15	1
									0.35	-7.5	1
									0.45	-7.5	1
									0.45	-2.5	1
									0.35	-2.5	1
									0.35	-7.5	1
									0.35	2.5	0.55
									0.35	-2.5	0.55
									0.45	-2.5	0.55
									0.45	2.5	0.55
									0.35	5	1
									0.35	2.5	1
									0.45	2.5	1
									0.45	5	1
									0.375	5	1
									0.375	5	0
									0.45	5	0
									0.45	5	0
									0.35	5	0
									0.35	5	0
									0.45	-15	1
									0.45	-25	1
									0.55	-25	1
									0.55	-15	1
									0.45	-7.5	1
									0.45	-15	1
									0.55	-15	1
									0.55	-7.5	1
									0.45	-7.5	1
									0.45	-2.5	1
									0.55	-2.5	1
									0.55	-7.5	1
									0.55	2.5	0.65
									0.55	-2.5	0.65
									0.45	-2.5	0.65
									0.45	2.5	0.65
									0.55	2.5	1
									0.55	5	1
									0.45	5	1
									0.45	2.5	1
									0.45	5	0
									0.55	5	0
									0.55	5	0
									0.45	5	0
									0.55	-15	1
									0.65	-15	1
									0.65	-25	1
									0.55	-25	1
									0.55	-7.5	1
									0.55	-15	1
									0.65	-15	1
									0.65	-7.5	1
									0.55	-7.5	1
									0.65	-7.5	1
									0.65	-2.5	1
									0.55	-2.5	1
									0.55	2.5	0.7
									0.55	-2.5	0.7
									0.65	-2.5	0.7
									0.65	2.5	0.7
									0.55	2.5	1
									0.65	2.5	1
									0.65	5	1
									0.55	5	1
									0.65	5	0.1
									0.65	5	0.1
									0.55	5	0.1
									0.55	5	0.1
									0.65	-25	1
									0.75	-25	1
									0.75	-15	1
									0.65	-15	1
									0.65	-7.5	1
									0.65	-15	1
									0.75	-15	1
									0.75	-7.5	1
									0.65	-7.5	1
									0.75	-7.5	1
									0.75	-2.5	1
									0.65	-2.5	1
									0.65	-2.5	0.7
									0.75	-2.5	0.7
									0.75	2.5	0.7
									0.65	2.5	0.7
									0.65	2.5	1
									0.75	2.5	1
									0.75	5	1
									0.65	5	1
									0.65	5	0.1
									0.65	5	0.1
									0.75	5	0.1
									0.75	5	0.1
									0.85	-15	1
									0.75	-15	1
									0.75	-25	1
									0.775	-25	1
									0.85	-25	1
									0.85	-7.5	1
									0.85	-15	1
									0.75	-15	1
									0.75	-7.5	1
									0.85	-2.5	1
									0.75	-2.5	1
									0.75	-7.5	1
									0.85	-7.5	1
									0.85	-2.5	0.95
									0.75	-2.5	0.95
									0.75	2.5	0.95
									0.85	2.5	0.95
									0.85	2.5	1
									0.85	5	1
									0.75	5	1
									0.75	2.5	1
									0.85	5	0.1
									0.775	5	0.1
									0.75	5	0.1
									0.75	5	0.1
									0.85	5	0.1
									0.85	-15	1
									0.85	-25	1
									0.95	-25	1
									0.95	-15	1
									0.95	-7.5	1
									0.95	-15	1
									0.85	-15	1
									0.85	-7.5	1
									0.95	-2.5	1
									0.95	-7.5	1
									0.85	-7.5	1
									0.85	-2.5	1
									0.95	-2.5	0.95
									0.95	2.5	0.95
									0.85	2.5	0.95
									0.85	-2.5	0.95
									0.85	2.5	1
									0.95	2.5	1
									0.95	5	1
									0.85	5	1
									0.85	5	0.3
									0.85	5	0.3
									0.95	5	0.3
									0.95	5	0.3
									0.95	-15	1
									1.05	-15	1
									1.05	-25	1
									0.95	-25	1
									0.95	-7.5	1
									0.95	-15	1
									1.05	-15	1
									1.05	-7.5	1
									0.95	-2.5	1
									1.05	-2.5	1
									1.05	-7.5	1
									0.95	-7.5	1
									0.95	-2.5	0.85
									0.95	2.5	0.85
									1.05	2.5	0.85
									1.05	-2.5	0.85
									0.95	5	1
									1.05	5	1
									1.05	2.5	1
									0.95	2.5	1
									0.95	5	0
									1.05	5	0
									1.05	5	0
									0.95	5	0
									1.15	-15	1
									1.15	-25	1
									1.05	-25	1
									1.05	-15	1
									1.05	-7.5	1
									1.05	-15	1
									1.15	-15	1
									1.15	-7.5	1
									1.15	-2.5	1
									1.05	-2.5	1
									1.05	-7.5	1
									1.15	-7.5	1
									1.15	2.5	0.95
									1.15	-2.5	0.95
									1.05	-2.5	0.95
									1.05	2.5	0.95
									1.15	2.5	1
									1.05	2.5	1
									1.05	5	1
									1.15	5	1
									1.15	5	0
									1.15	5	0
									1.05	5	0
									1.05	5	0
									1.15	-15	1
									1.15	-25	1
									1.2	-25	1
									1.2	-15	1
									1.2	-7.5	1
									1.2	-15	1
									1.15	-15	1
									1.15	-7.5	1
									1.2	-2.5	1
									1.2	-7.5	1
									1.15	-7.5	1
									1.15	-2.5	1
									1.2	-2.5	0.9
									1.2	2.5	0.9
									1.15	2.5	0.9
									1.15	-2.5	0.9
									1.15	2.5	1
									1.15	5	1
									1.2	5	1
									1.2	2.5	1
									1.2	5	0.3
									1.2	5	0.3
									1.15	5	0.3
									1.15	5	0.3
									1.2	-15	1
									1.2	-25	1
									1.2	-25	1
									1.2	-15	1
									1.2	-7.5	1
									1.2	-15	1
									1.2	-15	1
									1.2	-7.5	1
									1.2	-2.5	1
									1.2	-7.5	1
									1.2	-7.5	1
									1.2	-2.5	1
									1.2	2.5	1
									1.2	-2.5	1
									1.2	-2.5	1
									1.2	2.5	1
									1.2	2.5	1
									1.2	2.5	1
									1.2	5	1
									1.2	5	1
									1.2	5	0.5
									1.2	5	0.5
									1.2	5	0.5
									1.2	5	0.5
									1.2	-15	1
									1.2	-25	1
									1.2	-25	1
									1.2	-15	1
									1.2	-15	1
									1.2	-7.5	1
									1.2	-7.5	1
									1.2	-15	1
									1.2	-2.5	1
									1.2	-7.5	1
									1.2	-7.5	1
									1.2	-2.5	1
									1.2	2.5	0.95
									1.2	-2.5	0.95
									1.2	-2.5	0.95
									1.2	2.5	0.95
									1.2	5	1
									1.2	2.5	1
									1.2	2.5	1
									1.2	5	1
									1.2	5	0.1
									1.2	5	0.1
									1.2	5	0.1
									1.2	5	0.1
									1.2	-7.5	1
									1.2	-9	1
									1.2	-15	1
									1.2	-15	1
									1.2	-7.5	1
									1.2	-2.5	1
									1.2	-3.3	1
									1.2	-4.9	1
									1.2	-7.3	1
									1.2	-7.5	1
									1.2	-7.5	1
									1.2	-2.5	1
									1.2	2.5	1
									1.2	-2.5	1
									1.2	-2.5	1
									1.2	2.5	1
									1.2	2.5	1
									1.2	5	1
									1.2	5	1
									1.2	5	1
									1.2	5	1
									1.2	4.9	1
									1.2	3.3	1
									1.2	2.5	1
									1.2	2.5	1
									1.2	3.3	1
									1.2	-3.3	1
									1.2	-2.5	1
									1.2	4.9	1
									1.2	-4.9	1
									1.2	-3.3	1
									1.2	3.3	1
									1.2	4.9	1
									1.2	5	1
									1.2	-7.3	1
									1.2	-4.9	1
									1.2	-7.3	1
									1.2	5	1
									1.2	5	1
									1.2	-9	1
									1.2	-7.5	1

## Sheet: panel C
	Bottom panel								Top panel
	ITD function		IID function		Combined function				The figure is generated using the MATLAB function patch to plot filled polygons with the following x and y coordinates, and coloring each polygon according to the spike rate (see colorbar)
	ITD (ms)	Spikes/click	IID (dB SPL)	Spikes/click	ITD (ms)	Spikes/click			Patch x coordinates	Patch Y coordinates	Spike rate/click pair
	-2	1	-30	1.5	-0.2	0.55			-1.7	-17.5	1.025
	-1.8	1	-20	0.775	0	0.1			-1.9	-17.5	1.025
	-1.6	1	-15	0.25	0.15	0.05			-1.9	-25	1.025
	-1.4	0.975	-10	0.3	0.2	0.025			-1.7	-25	1.025
	-1.2	1.025	-5	0.15	0.3	0.05
	-1	1	0	0.1	0.35	0			-1.7	-17.5	1
	-0.8	0.975	5	0.05					-1.9	-17.5	1
	-0.6	0.975	10	0.05					-1.9	-12.5	1
	-0.4	0.375	15	0.05					-1.7	-12.5	1
	-0.2	0.2333	20	0.125
	0	0.1							-1.9	-7.5	1
	0.2	0.5							-1.9	-12.5	1
	0.4	0.4833							-1.7	-12.5	1
	0.6	0.6667							-1.7	-7.5	1
	0.8	0.7333
	1	1.0333							-1.7	-7.5	1
	1.2	1.45							-1.9	-7.5	1
	1.4	1.45							-1.9	-2.5	1
	1.6	1.5							-1.7	-2.5	1
	1.8	1.55
	2	1.375							-1.9	2.5	1
									-1.7	2.5	1
									-1.7	-2.5	1
									-1.9	-2.5	1
									-1.7	7.5	1
									-1.7	2.5	1
									-1.9	2.5	1
									-1.9	7.5	1
									-1.7	7.5	0.616667
									-1.9	7.5	0.616667
									-1.9	12.5	0.616667
									-1.7	12.5	0.616667
									-1.875	17.3	1
									-1.825	17.5	1
									-1.775	17.5	1
									-1.725	17.3	1
									-1.7	17.1	1
									-1.7	12.5	1
									-1.9	12.5	1
									-1.9	17.1	1
									-1.5	-17.5	0.975
									-1.5	-25	0.975
									-1.7	-25	0.975
									-1.7	-17.5	0.975
									-1.5	-12.5	1
									-1.7	-12.5	1
									-1.7	-17.5	1
									-1.5	-17.5	1
									-1.5	-12.5	1
									-1.7	-12.5	1
									-1.7	-7.5	1
									-1.5	-7.5	1
									-1.7	-2.5	1
									-1.7	-7.5	1
									-1.5	-7.5	1
									-1.5	-2.5	1
									-1.5	2.5	1
									-1.7	2.5	1
									-1.7	-2.5	1
									-1.5	-2.5	1
									-1.5	2.5	1
									-1.5	7.1	1
									-1.525	7.3	1
									-1.575	7.5	1
									-1.7	7.5	1
									-1.7	2.5	1
									-1.575	7.5	0.583333
									-1.7	7.5	0.583333
									-1.7	12.5	0.583333
									-1.575	12.5	0.583333
									-1.575	12.5	1
									-1.7	12.5	1
									-1.7	17.1	1
									-1.675	17.3	1
									-1.625	17.5	1
									-1.575	17.5	1
									-1.525	17.3	1
									-1.5	17.1	1
									-1.5	12.9	1
									-1.525	12.7	1
									-1.525	7.3	1
									-1.525	12.7	1
									-1.575	12.5	1
									-1.575	7.5	1
									-1.475	12.7	1
									-1.5	12.9	1
									-1.525	12.7	1
									-1.525	7.3	1
									-1.5	7.1	1
									-1.475	7.3	1
									-1.425	12.5	1
									-1.425	7.5	1
									-1.475	7.3	1
									-1.475	12.7	1
									-1.3	-17.5	1.05
									-1.3	-25	1.05
									-1.5	-25	1.05
									-1.5	-17.5	1.05
									-1.3	-12.5	1.05
									-1.5	-12.5	1.05
									-1.5	-17.5	1.05
									-1.3	-17.5	1.05
									-1.3	-12.5	1.05
									-1.3	-7.5	1.05
									-1.5	-7.5	1.05
									-1.5	-12.5	1.05
									-1.3	-7.5	1
									-1.5	-7.5	1
									-1.5	-2.5	1
									-1.3	-2.5	1
									-1.5	2.5	0.975
									-1.5	-2.5	0.975
									-1.3	-2.5	0.975
									-1.3	2.5	0.975
									-1.425	7.5	1
									-1.375	7.5	1
									-1.325	7.3	1
									-1.3	7.1	1
									-1.3	2.5	1
									-1.5	2.5	1
									-1.5	7.1	1
									-1.475	7.3	1
									-1.425	12.5	0.6875
									-1.375	12.5	0.6875
									-1.375	7.5	0.6875
									-1.425	7.5	0.6875
									-1.425	12.5	1
									-1.375	12.5	1
									-1.325	12.7	1
									-1.3	12.9	1
									-1.3	17.1	1
									-1.325	17.3	1
									-1.375	17.5	1
									-1.425	17.5	1
									-1.475	17.3	1
									-1.5	17.1	1
									-1.5	12.9	1
									-1.475	12.7	1
									-1.375	7.5	1
									-1.375	12.5	1
									-1.325	12.7	1
									-1.325	7.3	1
									-1.275	7.3	0.95
									-1.3	7.1	0.95
									-1.325	7.3	0.95
									-1.325	12.7	0.95
									-1.3	12.9	0.95
									-1.275	12.7	0.95
									-1.225	7.5	1
									-1.275	7.3	1
									-1.275	12.7	1
									-1.225	12.5	1
									-1.1	-17.5	1.15
									-1.1	-25	1.15
									-1.3	-25	1.15
									-1.3	-17.5	1.15
									-1.1	-17.5	1.1
									-1.1	-12.5	1.1
									-1.3	-12.5	1.1
									-1.3	-17.5	1.1
									-1.3	-12.5	1.35
									-1.1	-12.5	1.35
									-1.1	-7.5	1.35
									-1.3	-7.5	1.35
									-1.3	-7.5	1.1
									-1.1	-7.5	1.1
									-1.1	-2.5	1.1
									-1.3	-2.5	1.1
									-1.3	-2.5	1.025
									-1.3	2.5	1.025
									-1.1	2.5	1.025
									-1.1	-2.5	1.025
									-1.225	7.5	1
									-1.275	7.3	1
									-1.3	7.1	1
									-1.3	2.5	1
									-1.1	2.5	1
									-1.1	7.1	1
									-1.125	7.3	1
									-1.175	7.5	1
									-1.225	7.5	0.5375
									-1.225	12.5	0.5375
									-1.175	12.5	0.5375
									-1.175	7.5	0.5375
									-1.225	12.5	1
									-1.275	12.7	1
									-1.3	12.9	1
									-1.3	17.1	1
									-1.275	17.3	1
									-1.225	17.5	1
									-1.175	17.5	1
									-1.125	17.3	1
									-1.1	17.1	1
									-1.1	12.9	1
									-1.125	12.7	1
									-1.175	12.5	1
									-1.175	7.5	1
									-1.125	7.3	1
									-1.125	12.7	1
									-1.175	12.5	1
									-1.075	7.3	1
									-1.1	7.1	1
									-1.125	7.3	1
									-1.125	12.7	1
									-1.1	12.9	1
									-1.075	12.7	1
									-1.075	7.3	1
									-1.075	12.7	1
									-1.025	12.5	1
									-1.025	7.5	1
									-1.1	-17.5	1.275
									-1.1	-25	1.275
									-0.9	-25	1.275
									-0.9	-17.5	1.275
									-1.1	-12.5	1.1
									-0.9	-12.5	1.1
									-0.9	-17.5	1.1
									-1.1	-17.5	1.1
									-1.1	-12.5	1.15
									-1.1	-7.5	1.15
									-0.9	-7.5	1.15
									-0.9	-12.5	1.15
									-1.1	-7.5	1.1
									-0.9	-7.5	1.1
									-0.9	-2.5	1.1
									-1.1	-2.5	1.1
									-1.1	2.5	1
									-0.9	2.5	1
									-0.9	-2.5	1
									-1.1	-2.5	1
									-1.075	7.3	1.05
									-1.1	7.1	1.05
									-1.1	2.5	1.05
									-0.9	2.5	1.05
									-0.9	7.1	1.05
									-0.925	7.3	1.05
									-0.975	7.5	1.05
									-1.025	7.5	1.05
									-1.025	7.5	0.55
									-0.975	7.5	0.55
									-0.975	12.5	0.55
									-1.025	12.5	0.55
									-1.075	12.7	1
									-1.1	12.9	1
									-1.1	17.1	1
									-1.075	17.3	1
									-1.025	17.5	1
									-0.975	17.5	1
									-0.925	17.3	1
									-0.9	17.1	1
									-0.9	12.9	1
									-0.925	12.7	1
									-0.975	12.5	1
									-1.025	12.5	1
									-0.925	7.3	1
									-0.925	12.7	1
									-0.975	12.5	1
									-0.975	7.5	1
									-0.925	7.3	1
									-0.925	12.7	1
									-0.9	12.9	1
									-0.875	12.7	1
									-0.875	7.3	1
									-0.9	7.1	1
									-0.825	7.5	1
									-0.875	7.3	1
									-0.875	12.7	1
									-0.825	12.5	1
									-0.9	-17.5	1.275
									-0.9	-25	1.275
									-0.7	-25	1.275
									-0.7	-17.5	1.275
									-0.7	-12.5	1.4
									-0.7	-17.5	1.4
									-0.9	-17.5	1.4
									-0.9	-12.5	1.4
									-0.7	-7.5	1.2
									-0.7	-12.5	1.2
									-0.9	-12.5	1.2
									-0.9	-7.5	1.2
									-0.7	-7.5	1.3
									-0.7	-2.5	1.3
									-0.9	-2.5	1.3
									-0.9	-7.5	1.3
									-0.7	-2.5	0.975
									-0.7	2.5	0.975
									-0.9	2.5	0.975
									-0.9	-2.5	0.975
									-0.825	7.5	1.05
									-0.875	7.3	1.05
									-0.9	7.1	1.05
									-0.9	2.5	1.05
									-0.7	2.5	1.05
									-0.7	7.1	1.05
									-0.725	7.3	1.05
									-0.775	7.5	1.05
									-0.825	7.5	0.7375
									-0.825	12.5	0.7375
									-0.775	12.5	0.7375
									-0.775	7.5	0.7375
									-0.825	12.5	1.05
									-0.875	12.7	1.05
									-0.9	12.9	1.05
									-0.9	17.1	1.05
									-0.875	17.3	1.05
									-0.825	17.5	1.05
									-0.775	17.5	1.05
									-0.725	17.3	1.05
									-0.7	17.1	1.05
									-0.7	12.9	1.05
									-0.725	12.7	1.05
									-0.775	12.5	1.05
									-0.775	7.5	0.9
									-0.725	7.3	0.9
									-0.725	12.7	0.9
									-0.775	12.5	0.9
									-0.675	7.3	0.95
									-0.7	7.1	0.95
									-0.725	7.3	0.95
									-0.725	12.7	0.95
									-0.7	12.9	0.95
									-0.675	12.7	0.95
									-0.675	7.3	1
									-0.675	12.7	1
									-0.625	12.5	1
									-0.625	7.5	1
									-0.5	-17.5	1.275
									-0.5	-25	1.275
									-0.7	-25	1.275
									-0.7	-17.5	1.275
									-0.7	-12.5	1.35
									-0.7	-17.5	1.35
									-0.5	-17.5	1.35
									-0.5	-12.5	1.35
									-0.7	-7.5	1.4
									-0.5	-7.5	1.4
									-0.5	-12.5	1.4
									-0.7	-12.5	1.4
									-0.7	-7.5	1.1
									-0.7	-2.5	1.1
									-0.5	-2.5	1.1
									-0.5	-7.5	1.1
									-0.7	-2.5	0.975
									-0.7	2.5	0.975
									-0.5	2.5	0.975
									-0.5	-2.5	0.975
									-0.675	7.3	1.05
									-0.7	7.1	1.05
									-0.7	2.5	1.05
									-0.5	2.5	1.05
									-0.5	7.1	1.05
									-0.525	7.3	1.05
									-0.575	7.5	1.05
									-0.625	7.5	1.05
									-0.625	7.5	0.925
									-0.575	7.5	0.925
									-0.575	12.5	0.925
									-0.625	12.5	0.925
									-0.675	12.7	1.2
									-0.7	12.9	1.2
									-0.7	17.1	1.2
									-0.675	17.3	1.2
									-0.625	17.5	1.2
									-0.575	17.5	1.2
									-0.525	17.3	1.2
									-0.5	17.1	1.2
									-0.5	12.9	1.2
									-0.525	12.7	1.2
									-0.575	12.5	1.2
									-0.625	12.5	1.2
									-0.575	7.5	0.45
									-0.575	12.5	0.45
									-0.525	12.7	0.45
									-0.525	7.3	0.45
									-0.525	7.3	0.55
									-0.5	7.1	0.55
									-0.475	7.3	0.55
									-0.475	12.7	0.55
									-0.5	12.9	0.55
									-0.525	12.7	0.55
									-0.425	7.5	0.15
									-0.425	12.5	0.15
									-0.475	12.7	0.15
									-0.475	7.3	0.15
									-0.5	-17.5	0.9
									-0.3	-17.5	0.9
									-0.3	-25	0.9
									-0.5	-25	0.9
									-0.3	-12.5	0.85
									-0.3	-17.5	0.85
									-0.5	-17.5	0.85
									-0.5	-12.5	0.85
									-0.5	-7.5	0.35
									-0.5	-12.5	0.35
									-0.3	-12.5	0.35
									-0.3	-7.5	0.35
									-0.5	-7.5	0.2
									-0.3	-7.5	0.2
									-0.3	-2.5	0.2
									-0.5	-2.5	0.2
									-0.3	-2.5	0.375
									-0.3	2.5	0.375
									-0.5	2.5	0.375
									-0.5	-2.5	0.375
									-0.375	7.5	0.75
									-0.425	7.5	0.75
									-0.475	7.3	0.75
									-0.5	7.1	0.75
									-0.5	2.5	0.75
									-0.3	2.5	0.75
									-0.3	7.1	0.75
									-0.325	7.3	0.75
									-0.375	12.5	0.7125
									-0.425	12.5	0.7125
									-0.425	7.5	0.7125
									-0.375	7.5	0.7125
									-0.425	17.5	1.1
									-0.475	17.3	1.1
									-0.5	17.1	1.1
									-0.5	12.9	1.1
									-0.475	12.7	1.1
									-0.425	12.5	1.1
									-0.375	12.5	1.1
									-0.325	12.7	1.1
									-0.3	12.9	1.1
									-0.3	17.1	1.1
									-0.325	17.3	1.1
									-0.375	17.5	1.1
									-0.375	12.5	0.15
									-0.375	7.5	0.15
									-0.325	7.3	0.15
									-0.325	12.7	0.15
									-0.325	12.7	0.25
									-0.3	12.9	0.25
									-0.275	12.7	0.25
									-0.275	7.3	0.25
									-0.3	7.1	0.25
									-0.325	7.3	0.25
									-0.225	12.5	0.1
									-0.275	12.7	0.1
									-0.275	7.3	0.1
									-0.225	7.5	0.1
									-0.3	-17.5	0.45
									-0.1	-17.5	0.45
									-0.1	-25	0.45
									-0.3	-25	0.45
									-0.1	-12.5	0.2
									-0.1	-17.5	0.2
									-0.3	-17.5	0.2
									-0.3	-12.5	0.2
									-0.1	-7.5	0.55
									-0.1	-12.5	0.55
									-0.3	-12.5	0.55
									-0.3	-7.5	0.55
									-0.1	-7.5	0
									-0.1	-2.5	0
									-0.3	-2.5	0
									-0.3	-7.5	0
									-0.1	2.5	0.233333
									-0.1	-2.5	0.233333
									-0.3	-2.5	0.233333
									-0.3	2.5	0.233333
									-0.175	7.5	0.35
									-0.125	7.3	0.35
									-0.1	7.1	0.35
									-0.1	2.5	0.35
									-0.3	2.5	0.35
									-0.3	7.1	0.35
									-0.275	7.3	0.35
									-0.225	7.5	0.35
									-0.175	12.5	0.3875
									-0.175	7.5	0.3875
									-0.225	7.5	0.3875
									-0.225	12.5	0.3875
									-0.175	12.5	0.6
									-0.125	12.7	0.6
									-0.1	12.9	0.6
									-0.1	17.1	0.6
									-0.125	17.3	0.6
									-0.175	17.5	0.6
									-0.225	17.5	0.6
									-0.275	17.3	0.6
									-0.3	17.1	0.6
									-0.3	12.9	0.6
									-0.275	12.7	0.6
									-0.225	12.5	0.6
									-0.175	12.5	0.1
									-0.125	12.7	0.1
									-0.125	7.3	0.1
									-0.175	7.5	0.1
									-0.075	12.7	0
									-0.1	12.9	0
									-0.125	12.7	0
									-0.125	7.3	0
									-0.1	7.1	0
									-0.075	7.3	0
									-0.025	12.5	0
									-0.025	7.5	0
									-0.075	7.3	0
									-0.075	12.7	0
									0.1	-17.5	0.775
									-0.1	-17.5	0.775
									-0.1	-25	0.775
									0.1	-25	0.775
									0.1	-12.5	0.25
									0.1	-17.5	0.25
									-0.1	-17.5	0.25
									-0.1	-12.5	0.25
									-0.1	-12.5	0.3
									-0.1	-7.5	0.3
									0.1	-7.5	0.3
									0.1	-12.5	0.3
									-0.1	-7.5	0.15
									-0.1	-2.5	0.15
									0.1	-2.5	0.15
									0.1	-7.5	0.15
									0.1	2.5	0.1
									0.1	-2.5	0.1
									-0.1	-2.5	0.1
									-0.1	2.5	0.1
									-0.025	7.5	0.05
									0.025	7.5	0.05
									0.075	7.3	0.05
									0.1	7.1	0.05
									0.1	2.5	0.05
									-0.1	2.5	0.05
									-0.1	7.1	0.05
									-0.075	7.3	0.05
									-0.025	12.5	0.05
									0.025	12.5	0.05
									0.025	7.5	0.05
									-0.025	7.5	0.05
									-0.025	12.5	0.05
									0.025	12.5	0.05
									0.075	12.7	0.05
									0.1	12.9	0.05
									0.1	17.1	0.05
									0.075	17.3	0.05
									0.025	17.5	0.05
									-0.025	17.5	0.05
									-0.075	17.3	0.05
									-0.1	17.1	0.05
									-0.1	12.9	0.05
									-0.075	12.7	0.05
									0.025	12.5	0
									0.075	12.7	0
									0.075	7.3	0
									0.025	7.5	0
									0.125	12.7	0
									0.1	12.9	0
									0.075	12.7	0
									0.075	7.3	0
									0.1	7.1	0
									0.125	7.3	0
									0.175	12.5	0.05
									0.125	12.7	0.05
									0.125	7.3	0.05
									0.175	7.5	0.05
									0.3	-17.5	0.675
									0.3	-25	0.675
									0.1	-25	0.675
									0.1	-17.5	0.675
									0.3	-12.5	0.25
									0.1	-12.5	0.25
									0.1	-17.5	0.25
									0.3	-17.5	0.25
									0.3	-12.5	0.3
									0.3	-7.5	0.3
									0.1	-7.5	0.3
									0.1	-12.5	0.3
									0.3	-7.5	0.05
									0.1	-7.5	0.05
									0.1	-2.5	0.05
									0.3	-2.5	0.05
									0.3	2.5	0.5
									0.1	2.5	0.5
									0.1	-2.5	0.5
									0.3	-2.5	0.5
									0.175	7.5	0
									0.125	7.3	0
									0.1	7.1	0
									0.1	2.5	0
									0.3	2.5	0
									0.3	7.1	0
									0.275	7.3	0
									0.225	7.5	0
									0.175	12.5	0.025
									0.175	7.5	0.025
									0.225	7.5	0.025
									0.225	12.5	0.025
									0.175	12.5	0
									0.125	12.7	0
									0.1	12.9	0
									0.1	17.1	0
									0.125	17.3	0
									0.175	17.5	0
									0.225	17.5	0
									0.275	17.3	0
									0.3	17.1	0
									0.3	12.9	0
									0.275	12.7	0
									0.225	12.5	0
									0.225	12.5	0.1
									0.275	12.7	0.1
									0.275	7.3	0.1
									0.225	7.5	0.1
									0.325	12.7	0
									0.3	12.9	0
									0.275	12.7	0
									0.275	7.3	0
									0.3	7.1	0
									0.325	7.3	0
									0.375	12.5	0.05
									0.375	7.5	0.05
									0.325	7.3	0.05
									0.325	12.7	0.05
									0.3	-17.5	1.1
									0.3	-25	1.1
									0.5	-25	1.1
									0.5	-17.5	1.1
									0.3	-12.5	0.7
									0.3	-17.5	0.7
									0.5	-17.5	0.7
									0.5	-12.5	0.7
									0.5	-7.5	0.55
									0.3	-7.5	0.55
									0.3	-12.5	0.55
									0.5	-12.5	0.55
									0.5	-2.5	0.25
									0.3	-2.5	0.25
									0.3	-7.5	0.25
									0.5	-7.5	0.25
									0.5	-2.5	0.483333
									0.3	-2.5	0.483333
									0.3	2.5	0.483333
									0.5	2.5	0.483333
									0.375	7.5	0.05
									0.425	7.5	0.05
									0.475	7.3	0.05
									0.5	7.1	0.05
									0.5	2.5	0.05
									0.3	2.5	0.05
									0.3	7.1	0.05
									0.325	7.3	0.05
									0.375	12.5	0.0125
									0.425	12.5	0.0125
									0.425	7.5	0.0125
									0.375	7.5	0.0125
									0.375	12.5	0.05
									0.425	12.5	0.05
									0.475	12.7	0.05
									0.5	12.9	0.05
									0.5	17.1	0.05
									0.475	17.3	0.05
									0.425	17.5	0.05
									0.375	17.5	0.05
									0.325	17.3	0.05
									0.3	17.1	0.05
									0.3	12.9	0.05
									0.325	12.7	0.05
									0.425	12.5	0.05
									0.475	12.7	0.05
									0.475	7.3	0.05
									0.425	7.5	0.05
									0.525	12.7	0.1
									0.5	12.9	0.1
									0.475	12.7	0.1
									0.475	7.3	0.1
									0.5	7.1	0.1
									0.525	7.3	0.1
									0.575	12.5	0.1
									0.575	7.5	0.1
									0.525	7.3	0.1
									0.525	12.7	0.1
									0.7	-17.5	1.275
									0.5	-17.5	1.275
									0.5	-25	1.275
									0.7	-25	1.275
									0.7	-17.5	0.85
									0.5	-17.5	0.85
									0.5	-12.5	0.85
									0.7	-12.5	0.85
									0.5	-7.5	1.05
									0.5	-12.5	1.05
									0.7	-12.5	1.05
									0.7	-7.5	1.05
									0.5	-7.5	0.3
									0.5	-2.5	0.3
									0.7	-2.5	0.3
									0.7	-7.5	0.3
									0.5	2.5	0.666667
									0.5	-2.5	0.666667
									0.7	-2.5	0.666667
									0.7	2.5	0.666667
									0.575	7.5	0.1
									0.625	7.5	0.1
									0.675	7.3	0.1
									0.7	7.1	0.1
									0.7	2.5	0.1
									0.5	2.5	0.1
									0.5	7.1	0.1
									0.525	7.3	0.1
									0.575	12.5	0.075
									0.625	12.5	0.075
									0.625	7.5	0.075
									0.575	7.5	0.075
									0.575	12.5	0
									0.625	12.5	0
									0.675	12.7	0
									0.7	12.9	0
									0.7	17.1	0
									0.675	17.3	0
									0.625	17.5	0
									0.575	17.5	0
									0.525	17.3	0
									0.5	17.1	0
									0.5	12.9	0
									0.525	12.7	0
									0.625	12.5	0.15
									0.625	7.5	0.15
									0.675	7.3	0.15
									0.675	12.7	0.15
									0.725	12.7	0.2
									0.7	12.9	0.2
									0.675	12.7	0.2
									0.675	7.3	0.2
									0.7	7.1	0.2
									0.725	7.3	0.2
									0.775	12.5	0.2
									0.775	7.5	0.2
									0.725	7.3	0.2
									0.725	12.7	0.2
									0.7	-25	1.8
									0.7	-17.5	1.8
									0.9	-17.5	1.8
									0.9	-25	1.8
									0.9	-17.5	1.65
									0.7	-17.5	1.65
									0.7	-12.5	1.65
									0.9	-12.5	1.65
									0.7	-7.5	1.6
									0.9	-7.5	1.6
									0.9	-12.5	1.6
									0.7	-12.5	1.6
									0.7	-2.5	0.7
									0.7	-7.5	0.7
									0.9	-7.5	0.7
									0.9	-2.5	0.7
									0.7	-2.5	0.733333
									0.9	-2.5	0.733333
									0.9	2.5	0.733333
									0.7	2.5	0.733333
									0.825	7.5	0.5
									0.775	7.5	0.5
									0.725	7.3	0.5
									0.7	7.1	0.5
									0.7	2.5	0.5
									0.9	2.5	0.5
									0.9	7.1	0.5
									0.875	7.3	0.5
									0.825	7.5	0.15
									0.775	7.5	0.15
									0.775	12.5	0.15
									0.825	12.5	0.15
									0.825	12.5	0.15
									0.775	12.5	0.15
									0.725	12.7	0.15
									0.7	12.9	0.15
									0.7	17.1	0.15
									0.725	17.3	0.15
									0.775	17.5	0.15
									0.825	17.5	0.15
									0.875	17.3	0.15
									0.9	17.1	0.15
									0.9	12.9	0.15
									0.875	12.7	0.15
									0.825	7.5	0.3
									0.825	12.5	0.3
									0.875	12.7	0.3
									0.875	7.3	0.3
									0.875	7.3	0.15
									0.9	7.1	0.15
									0.925	7.3	0.15
									0.925	12.7	0.15
									0.9	12.9	0.15
									0.875	12.7	0.15
									0.925	7.3	0.4
									0.975	7.5	0.4
									0.975	12.5	0.4
									0.925	12.7	0.4
									0.9	-17.5	1.65
									0.9	-25	1.65
									1.1	-25	1.65
									1.1	-17.5	1.65
									0.9	-17.5	1.7
									1.1	-17.5	1.7
									1.1	-12.5	1.7
									0.9	-12.5	1.7
									0.9	-12.5	1.7
									0.9	-7.5	1.7
									1.1	-7.5	1.7
									1.1	-12.5	1.7
									1.1	-7.5	1
									1.1	-2.5	1
									0.9	-2.5	1
									0.9	-7.5	1
									0.9	-2.5	1.03333
									0.9	2.5	1.03333
									1.1	2.5	1.03333
									1.1	-2.5	1.03333
									0.9	7.1	0.4
									0.9	2.5	0.4
									1.1	2.5	0.4
									1.1	7.5	0.4
									0.975	7.5	0.4
									0.925	7.3	0.4
									0.975	7.5	0.17
									0.975	12.5	0.17
									1.1	12.5	0.17
									1.1	7.5	0.17
									0.9	17.1	0
									0.9	12.9	0
									0.925	12.7	0
									0.975	12.5	0
									1.1	12.5	0
									1.1	17.5	0
									0.975	17.5	0
									0.925	17.3	0
									1.1	-25	2.05
									1.3	-26.6	2.05
									1.3	-17.5	2.05
									1.1	-17.5	2.05
									1.1	-17.5	1.7
									1.3	-17.5	1.7
									1.3	-12.5	1.7
									1.1	-12.5	1.7
									1.3	-7.5	1.85
									1.3	-12.5	1.85
									1.1	-12.5	1.85
									1.1	-7.5	1.85
									1.3	-7.5	1.25
									1.3	-2.5	1.25
									1.1	-2.5	1.25
									1.1	-7.5	1.25
									1.3	-2.5	1.45
									1.3	2.5	1.45
									1.1	2.5	1.45
									1.1	-2.5	1.45
									1.3	7.5	0.65
									1.3	2.5	0.65
									1.1	2.5	0.65
									1.1	7.5	0.65
									1.1	12.5	0.2875
									1.1	7.5	0.2875
									1.3	7.5	0.2875
									1.3	12.5	0.2875
									1.1	17.5	0.1
									1.1	12.5	0.1
									1.3	12.5	0.1
									1.3	17.5	0.1
									1.3	-17.5	2.05
									1.5	-17.5	2.05
									1.5	-29.8	2.05
									1.3	-26.6	2.05
									1.3	-17.5	1.75
									1.3	-12.5	1.75
									1.5	-12.5	1.75
									1.5	-17.5	1.75
									1.3	-7.5	1.8
									1.5	-7.5	1.8
									1.5	-12.5	1.8
									1.3	-12.5	1.8
									1.3	-7.5	1.1
									1.3	-2.5	1.1
									1.5	-2.5	1.1
									1.5	-7.5	1.1
									1.3	-2.5	1.45
									1.3	2.5	1.45
									1.5	2.5	1.45
									1.5	-2.5	1.45
									1.5	7.5	0.4
									1.3	7.5	0.4
									1.3	2.5	0.4
									1.5	2.5	0.4
									1.5	7.5	0.4625
									1.5	12.5	0.4625
									1.3	12.5	0.4625
									1.3	7.5	0.4625
									1.5	12.5	0
									1.5	17.5	0
									1.3	17.5	0
									1.3	12.5	0
									1.5	-29.8	2.1
									1.7	-34.6	2.1
									1.7	-17.5	2.1
									1.5	-17.5	2.1
									1.5	-17.5	1.65
									1.7	-17.5	1.65
									1.7	-12.5	1.65
									1.5	-12.5	1.65
									1.5	-12.5	1.7
									1.5	-7.5	1.7
									1.7	-7.5	1.7
									1.7	-12.5	1.7
									1.5	-2.5	1
									1.7	-2.5	1
									1.7	-7.5	1
									1.5	-7.5	1
									1.5	2.5	1.5
									1.5	-2.5	1.5
									1.7	-2.5	1.5
									1.7	2.5	1.5
									1.5	7.5	0.3
									1.5	2.5	0.3
									1.7	2.5	0.3
									1.7	7.5	0.3
									1.5	12.5	0.2
									1.7	12.5	0.2
									1.7	7.5	0.2
									1.5	7.5	0.2
									1.5	12.5	0.15
									1.5	17.5	0.15
									1.7	17.5	0.15
									1.7	12.5	0.15
									1.7	-34.6	2
									1.7	-17.5	2
									1.9	-17.5	2
									1.9	-41	2
									1.9	-17.5	1.6
									1.9	-12.5	1.6
									1.7	-12.5	1.6
									1.7	-17.5	1.6
									1.7	-7.5	1.35
									1.9	-7.5	1.35
									1.9	-12.5	1.35
									1.7	-12.5	1.35
									1.7	-2.5	1.05
									1.7	-7.5	1.05
									1.9	-7.5	1.05
									1.9	-2.5	1.05
									1.9	2.5	1.55
									1.9	-2.5	1.55
									1.7	-2.5	1.55
									1.7	2.5	1.55
									1.9	2.5	0.2
									1.7	2.5	0.2
									1.7	7.5	0.2
									1.9	7.5	0.2
									1.9	7.5	0.175
									1.9	12.5	0.175
									1.7	12.5	0.175
									1.7	7.5	0.175
									1.7	12.5	0.15
									1.9	12.5	0.15
									1.9	17.5	0.15
									1.7	17.5	0.15
