# Supplementary material for: Glycinergic axonal inhibition subserves acute spatial sensitivity to sudden increases in sound intensity
Source: eLife journal article supplement (doi:10.7554/elife.62183), 2021-06-14
Supplement: supp [file elife-62183-supp-v1.zip › elife_poa_e62183_Figure_8_source_data_1.xlsx]

## Sheet: panel D
	Top panel				Bottom panel
	Sound level (dB)	Post-stimulus time (ms)	Vm rel (mV)		Sound level (dB)	Post-stimulus time (ms)	Vm rel (mV)
	0	3.00768	-0.0372963		0	3.00768	0.082077
	0	3.01792	-0.0083046		0	3.01792	0.0862122
	0	3.02816	-0.00265121		0	3.02816	0.0899124
	0	3.0384	-0.00550842		0	3.0384	0.0807877
	0	3.04864	0.0123177		0	3.04864	0.0459518
	0	3.05888	0.000175476		0	3.05888	0.0276108
	0	3.06912	-0.0175323		0	3.06912	0.0120125
	0	3.07936	-0.0426102		0	3.07936	0.0130081
	0	3.0896	-0.0444183		0	3.0896	-0.000770569
	0	3.09984	-0.0357094		0	3.09984	0.0102921
	0	3.11008	-0.04039		0	3.11008	-0.0124054
	0	3.12032	-0.0156631		0	3.12032	0.0144501
	0	3.13056	0.0179672		0	3.13056	0.0182877
	0	3.1408	0.0285339		0	3.1408	0.00988007
	0	3.15104	0.00337219		0	3.15104	0.0129433
	0	3.16128	0.0353699		0	3.16128	-0.00284576
	0	3.17152	0.0538216		0	3.17152	0.00431442
	0	3.18176	0.0220947		0	3.18176	0.0141907
	0	3.192	0.0285492		0	3.192	0.0208664
	0	3.20224	0.0122757		0	3.20224	-0.0176086
	0	3.21248	0.0368958		0	3.21248	-0.0548935
	0	3.22272	0.0472374		0	3.22272	-0.0675468
	0	3.23296	0.0407867		0	3.23296	-0.0422935
	0	3.2432	0.0508347		0	3.2432	-0.0294876
	0	3.25344	0.0426521		0	3.25344	-0.0421791
	0	3.26368	-0.00475693		0	3.26368	-0.0394516
	0	3.27392	-0.0228882		0	3.27392	-0.0145645
	0	3.28416	-0.0197678		0	3.28416	0.00678253
	0	3.2944	0.00140762		0	3.2944	-0.0237503
	0	3.30464	0.0132141		0	3.30464	-0.0292435
	0	3.31488	0.0480537		0	3.31488	-0.0389633
	0	3.32512	0.0416946		0	3.32512	-0.0604668
	0	3.33536	0.013855		0	3.33536	-0.0581055
	0	3.3456	0.0375214		0	3.3456	-0.0569382
	0	3.35584	0.0377312		0	3.35584	-0.049736
	0	3.36608	0.0397835		0	3.36608	-0.0669937
	0	3.37632	0.0557861		0	3.37632	-0.0544853
	0	3.38656	0.0837517		0	3.38656	-0.0458565
	0	3.3968	0.0726852		0	3.3968	-0.0411835
	0	3.40704	0.0662918		0	3.40704	-0.0393829
	0	3.41728	0.0795288		0	3.41728	-0.0505753
	0	3.42752	0.114365		0	3.42752	-0.0521851
	0	3.43776	0.0868073		0	3.43776	-0.0303993
	0	3.448	0.0768433		0	3.448	-0.0417557
	0	3.45824	0.0654755		0	3.45824	-0.0736847
	0	3.46848	0.109894		0	3.46848	-0.0794945
	0	3.47872	0.121796		0	3.47872	-0.0802231
	0	3.48896	0.11742		0	3.48896	-0.0807953
	0	3.4992	0.147427		0	3.4992	-0.0977859
	0	3.50944	0.157642		0	3.50944	-0.073082
	0	3.51968	0.165565		0	3.51968	-0.0535011
	0	3.52992	0.166805		0	3.52992	-0.0589104
	0	3.54016	0.165077		0	3.54016	-0.0871201
	0	3.5504	0.133873		0	3.5504	-0.0997696
	0	3.56064	0.144329		0	3.56064	-0.102276
	0	3.57088	0.153		0	3.57088	-0.122829
	0	3.58112	0.185471		0	3.58112	-0.135582
	0	3.59136	0.179199		0	3.59136	-0.157158
	0	3.6016	0.173294		0	3.6016	-0.167313
	0	3.61184	0.182011		0	3.61184	-0.174423
	0	3.62208	0.20002		0	3.62208	-0.155621
	0	3.63232	0.224808		0	3.63232	-0.162621
	0	3.64256	0.242188		0	3.64256	-0.170734
	0	3.6528	0.226917		0	3.6528	-0.1483
	0	3.66304	0.222404		0	3.66304	-0.153263
	0	3.67328	0.219013		0	3.67328	-0.163891
	0	3.68352	0.233704		0	3.68352	-0.18153
	0	3.69376	0.23851		0	3.69376	-0.207443
	0	3.704	0.24474		0	3.704	-0.234299
	0	3.71424	0.214371		0	3.71424	-0.206528
	0	3.72448	0.178383		0	3.72448	-0.235889
	0	3.73472	0.161022		0	3.73472	-0.274952
	0	3.74496	0.159336		0	3.74496	-0.257061
	0	3.7552	0.173397		0	3.7552	-0.243095
	0	3.76544	0.130188		0	3.76544	-0.237793
	0	3.77568	0.141006		0	3.77568	-0.281181
	0	3.78592	0.179604		0	3.78592	-0.317539
	0	3.79616	0.201035		0	3.79616	-0.328506
	0	3.8064	0.201527		0	3.8064	-0.313606
	0	3.81664	0.194813		0	3.81664	-0.31678
	0	3.82688	0.207333		0	3.82688	-0.295677
	0	3.83712	0.196941		0	3.83712	-0.316654
	0	3.84736	0.184498		0	3.84736	-0.289207
	0	3.8576	0.184589		0	3.8576	-0.272209
	0	3.86784	0.137241		0	3.86784	-0.29287
	0	3.87808	0.14539		0	3.87808	-0.283119
	0	3.88832	0.149979		0	3.88832	-0.278526
	0	3.89856	0.157166		0	3.89856	-0.283142
	0	3.9088	0.137478		0	3.9088	-0.320129
	0	3.91904	0.119225		0	3.91904	-0.333366
	0	3.92928	0.148487		0	3.92928	-0.315376
	0	3.93952	0.169632		0	3.93952	-0.316422
	0	3.94976	0.134296		0	3.94976	-0.372532
	0	3.96	0.140511		0	3.96	-0.410889
	0	3.97024	0.116653		0	3.97024	-0.385033
	0	3.98048	0.103077		0	3.98048	-0.383102
	0	3.99072	0.0674133		0	3.99072	-0.350376
	0	4.00096	0.0747643		0	4.00096	-0.35038
	0	4.0112	0.092823		0	4.0112	-0.323784
	0	4.02144	0.079895		0	4.02144	-0.345783
	0	4.03168	0.0855103		0	4.03168	-0.338806
	0	4.04192	0.0900459		0	4.04192	-0.327194
	0	4.05216	0.0633469		0	4.05216	-0.358727
	0	4.0624	0.0310745		0	4.0624	-0.355003
	0	4.07264	-0.00105286		0	4.07264	-0.360558
	0	4.08288	-0.00503922		0	4.08288	-0.322426
	0	4.09312	-0.0133896		0	4.09312	-0.346306
	0	4.10336	-0.0118523		0	4.10336	-0.346214
	0	4.1136	0.0306244		0	4.1136	-0.35046
	0	4.12384	0.051384		0	4.12384	-0.375908
	0	4.13408	0.0284119		0	4.13408	-0.42189
	0	4.14432	0.0121574		0	4.14432	-0.448692
	0	4.15456	0.00205994		0	4.15456	-0.442928
	0	4.1648	0.000305176		0	4.1648	-0.446964
	0	4.17504	-0.00641251		0	4.17504	-0.439541
	0	4.18528	-0.0167236		0	4.18528	-0.450264
	0	4.19552	-0.033371		0	4.19552	-0.491882
	0	4.20576	-0.025528		0	4.20576	-0.52356
	0	4.216	-0.0256577		0	4.216	-0.500137
	0	4.22624	-0.00838089		0	4.22624	-0.452526
	0	4.23648	0.00805283		0	4.23648	-0.475002
	0	4.24672	-0.0142937		0	4.24672	-0.52914
	0	4.25696	-0.000808716		0	4.25696	-0.542553
	0	4.2672	-0.0201607		0	4.2672	-0.534935
	0	4.27744	-0.0609703		0	4.27744	-0.554161
	0	4.28768	-0.0700531		0	4.28768	-0.556087
	0	4.29792	-0.104481		0	4.29792	-0.546364
	0	4.30816	-0.0849457		0	4.30816	-0.553078
	0	4.3184	-0.0898552		0	4.3184	-0.609768
	0	4.32864	-0.112717		0	4.32864	-0.646946
	0	4.33888	-0.12962		0	4.33888	-0.624428
	0	4.34912	-0.157787		0	4.34912	-0.592918
	0	4.35936	-0.163589		0	4.35936	-0.596123
	0	4.3696	-0.17487		0	4.3696	-0.596378
	0	4.37984	-0.18726		0	4.37984	-0.591251
	0	4.39008	-0.182587		0	4.39008	-0.571922
	0	4.40032	-0.188408		0	4.40032	-0.598625
	0	4.41056	-0.199394		0	4.41056	-0.612007
	0	4.4208	-0.195164		0	4.4208	-0.611439
	0	4.43104	-0.192932		0	4.43104	-0.630333
	0	4.44128	-0.211349		0	4.44128	-0.625198
	0	4.45152	-0.201897		0	4.45152	-0.647697
	0	4.46176	-0.190559		0	4.46176	-0.674725
	0	4.472	-0.201969		0	4.472	-0.696384
	0	4.48224	-0.237644		0	4.48224	-0.677437
	0	4.49248	-0.270844		0	4.49248	-0.676506
	0	4.50272	-0.263779		0	4.50272	-0.729561
	0	4.51296	-0.256424		0	4.51296	-0.740883
	0	4.5232	-0.29734		0	4.5232	-0.726067
	0	4.53344	-0.30669		0	4.53344	-0.689724
	0	4.54368	-0.282322		0	4.54368	-0.667049
	0	4.55392	-0.270596		0	4.55392	-0.673927
	0	4.56416	-0.278946		0	4.56416	-0.664379
	0	4.5744	-0.304493		0	4.5744	-0.616611
	0	4.58464	-0.318516		0	4.58464	-0.563251
	0	4.59488	-0.306107		0	4.59488	-0.54483
	0	4.60512	-0.313984		0	4.60512	-0.519775
	0	4.61536	-0.285843		0	4.61536	-0.483547
	0	4.6256	-0.290169		0	4.6256	-0.466656
	0	4.63584	-0.301109		0	4.63584	-0.466137
	0	4.64608	-0.319077		0	4.64608	-0.450584
	0	4.65632	-0.335457		0	4.65632	-0.450737
	0	4.66656	-0.333923		0	4.66656	-0.479588
	0	4.6768	-0.323898		0	4.6768	-0.480564
	0	4.68704	-0.332214		0	4.68704	-0.4487
	0	4.69728	-0.35535		0	4.69728	-0.434959
	0	4.70752	-0.360439		0	4.70752	-0.427567
	0	4.71776	-0.359436		0	4.71776	-0.404011
	0	4.728	-0.360245		0	4.728	-0.384743
	0	4.73824	-0.385406		0	4.73824	-0.391277
	0	4.74848	-0.400215		0	4.74848	-0.384159
	0	4.75872	-0.403709		0	4.75872	-0.329323
	0	4.76896	-0.400364		0	4.76896	-0.321999
	0	4.7792	-0.429779		0	4.7792	-0.317612
	0	4.78944	-0.404476		0	4.78944	-0.312016
	0	4.79968	-0.386238		0	4.79968	-0.307503
	0	4.80992	-0.380215		0	4.80992	-0.280853
	0	4.82016	-0.42131		0	4.82016	-0.242683
	0	4.8304	-0.44548		0	4.8304	-0.233162
	0	4.84064	-0.46312		0	4.84064	-0.220562
	0	4.85088	-0.49102		0	4.85088	-0.206367
	0	4.86112	-0.489426		0	4.86112	-0.189529
	0	4.87136	-0.448544		0	4.87136	-0.165894
	0	4.8816	-0.454254		0	4.8816	-0.146721
	0	4.89184	-0.480503		0	4.89184	-0.130508
	0	4.90208	-0.5163		0	4.90208	-0.123455
	0	4.91232	-0.503281		0	4.91232	-0.104881
	0	4.92256	-0.505249		0	4.92256	-0.10252
	0	4.9328	-0.516315		0	4.9328	-0.0847092
	0	4.94304	-0.540123		0	4.94304	-0.0846329
	0	4.95328	-0.566528		0	4.95328	-0.0751495
	0	4.96352	-0.561516		0	4.96352	-0.0761528
	0	4.97376	-0.570633		0	4.97376	-0.0892487
	0	4.984	-0.565247		0	4.984	-0.071846
	0	4.99424	-0.587921		0	4.99424	-0.0534248
	0	5.00448	-0.60289		0	5.00448	-0.0326309
	0	5.01472	-0.60088		0	5.01472	-0.0317001
	0	5.02496	-0.57439		0	5.02496	0.0149307
	0	5.0352	-0.561523		0	5.0352	0.0253258
	0	5.04544	-0.570457		0	5.04544	0.0243912
	0	5.05568	-0.566803		0	5.05568	0.0106239
	0	5.06592	-0.520828		0	5.06592	0.00421143
	0	5.07616	-0.530602		0	5.07616	-0.00411224
	0	5.0864	-0.564407		0	5.0864	-0.0036087
	0	5.09664	-0.563019		0	5.09664	-0.00237656
	0	5.10688	-0.581158		0	5.10688	0.0271301
	0	5.11712	-0.583721		0	5.11712	0.0119133
	0	5.12736	-0.604084		0	5.12736	0.0348434
	0	5.1376	-0.610153		0	5.1376	0.0710335
	0	5.14784	-0.604443		0	5.14784	0.0555344
	0	5.15808	-0.616661		0	5.15808	0.035183
	0	5.16832	-0.58215		0	5.16832	0.0299644
	0	5.17856	-0.549408		0	5.17856	0.0460968
	0	5.1888	-0.545135		0	5.1888	0.0774689
	0	5.19904	-0.542816		0	5.19904	0.0556221
	0	5.20928	-0.517117		0	5.20928	0.0516663
	0	5.21952	-0.536919		0	5.21952	0.0137863
	0	5.22976	-0.529587		0	5.22976	-0.0176468
	0	5.24	-0.483063		0	5.24	-0.0186844
	0	5.25024	-0.457092		0	5.25024	0.0209732
	0	5.26048	-0.480991		0	5.26048	0.0268631
	0	5.27072	-0.480972		0	5.27072	0.000171661
	0	5.28096	-0.460346		0	5.28096	-0.0102501
	0	5.2912	-0.442902		0	5.2912	-0.0274124
	0	5.30144	-0.447178		0	5.30144	-0.0255013
	0	5.31168	-0.445038		0	5.31168	-0.0079422
	0	5.32192	-0.405033		0	5.32192	-0.0399437
	0	5.33216	-0.383846		0	5.33216	-0.0360489
	0	5.3424	-0.358189		0	5.3424	-0.0259514
	0	5.35264	-0.319378		0	5.35264	-0.0347252
	0	5.36288	-0.298332		0	5.36288	-0.0460777
	0	5.37312	-0.288147		0	5.37312	-0.0246162
	0	5.38336	-0.290394		0	5.38336	-0.0287933
	0	5.3936	-0.270023		0	5.3936	-0.040493
	0	5.40384	-0.280045		0	5.40384	-0.0551796
	0	5.41408	-0.259048		0	5.41408	-0.0290375
	0	5.42432	-0.225658		0	5.42432	-0.0245476
	0	5.43456	-0.193916		0	5.43456	-0.0503616
	0	5.4448	-0.162224		0	5.4448	-0.0520477
	0	5.45504	-0.120407		0	5.45504	-0.0218773
	0	5.46528	-0.112007		0	5.46528	0.0266151
	0	5.47552	-0.115231		0	5.47552	0.0238533
	0	5.48576	-0.142246		0	5.48576	-0.0144234
	0	5.496	-0.155884		0	5.496	-0.0189972
	0	5.50624	-0.116699		0	5.50624	-0.0234184
	0	5.51648	-0.112991		0	5.51648	-0.0114441
	0	5.52672	-0.111877		0	5.52672	0.00123215
	0	5.53696	-0.109798		0	5.53696	0.0165634
	0	5.5472	-0.0750275		0	5.5472	-0.000263214
	0	5.55744	-0.0372734		0	5.55744	0.0100021
	0	5.56768	-0.0188751		0	5.56768	0.0349159
	0	5.57792	-0.0174561		0	5.57792	0.0356827
	0	5.58816	-0.00609589		0	5.58816	0.0479965
	0	5.5984	0.0206146		0	5.5984	0.0286903
	0	5.60864	0.027523		0	5.60864	0.036705
	0	5.61888	0.0514984		0	5.61888	0.0329666
	0	5.62912	0.0481873		0	5.62912	0.0123138
	0	5.63936	0.057621		0	5.63936	0.00791168
	0	5.6496	0.0731697		0	5.6496	0.035675
	0	5.65984	0.0740051		0	5.65984	0.0089035
	0	5.67008	0.0858917		0	5.67008	0.01297
	0	5.68032	0.0651131		0	5.68032	0.0364189
	0	5.69056	0.0186615		0	5.69056	0.0133018
	0	5.7008	0.0226402		0	5.7008	0.0122681
	0	5.71104	0.0454559		0	5.71104	0.00525665
	0	5.72128	0.0709534		0	5.72128	0.0337563
	0	5.73152	0.0892258		0	5.73152	0.0467606
	0	5.74176	0.0821457		0	5.74176	0.0401993
	0	5.752	0.110352		0	5.752	0.0818481
	0	5.76224	0.121262		0	5.76224	0.0461655
	0	5.77248	0.125244		0	5.77248	0.0788193
	0	5.78272	0.142426		0	5.78272	0.0916443
	0	5.79296	0.150814		0	5.79296	0.0909767
	0	5.8032	0.179329		0	5.8032	0.11253
	0	5.81344	0.175556		0	5.81344	0.0988998
	0	5.82368	0.182236		0	5.82368	0.0768089
	0	5.83392	0.191967		0	5.83392	0.112301
	0	5.84416	0.183823		0	5.84416	0.141891
	0	5.8544	0.173706		0	5.8544	0.151455
	0	5.86464	0.171875		0	5.86464	0.105331
	0	5.87488	0.187191		0	5.87488	0.080883
	0	5.88512	0.223282		0	5.88512	0.103352
	0	5.89536	0.213562		0	5.89536	0.112053
	0	5.9056	0.18425		0	5.9056	0.113762
	0	5.91584	0.204914		0	5.91584	0.0882912
	0	5.92608	0.231384		0	5.92608	0.0733948
	0	5.93632	0.215523		0	5.93632	0.0658035
	0	5.94656	0.172878		0	5.94656	0.0449448
	0	5.9568	0.18037		0	5.9568	0.0662193
	0	5.96704	0.196148		0	5.96704	0.109985
	0	5.97728	0.224743		0	5.97728	0.121563
	0	5.98752	0.211742		0	5.98752	0.107155
	0	5.99776	0.205006		0	5.99776	0.121067
	0	6.008	0.199802		0	6.008	0.118538
	0	6.01824	0.183239		0	6.01824	0.130611
	0	6.02848	0.18898		0	6.02848	0.0704689
	0	6.03872	0.182632		0	6.03872	0.0361366
	0	6.04896	0.216202		0	6.04896	0.0551567
	0	6.0592	0.239349		0	6.0592	0.0835876
	0	6.06944	0.216488		0	6.06944	0.116444
	0	6.07968	0.18663		0	6.07968	0.113182
	0	6.08992	0.168072		0	6.08992	0.103752
	0	6.10016	0.195351		0	6.10016	0.104301
	0	6.1104	0.249557		0	6.1104	0.0992203
	0	6.12064	0.257202		0	6.12064	0.0874863
	0	6.13088	0.265945		0	6.13088	0.105858
	0	6.14112	0.245049		0	6.14112	0.0789795
	0	6.15136	0.245354		0	6.15136	0.0625458
	0	6.1616	0.206997		0	6.1616	0.0583229
	0	6.17184	0.192509		0	6.17184	0.0667
	0	6.18208	0.173203		0	6.18208	0.0763206
	0	6.19232	0.165817		0	6.19232	0.106758
	0	6.20256	0.16671		0	6.20256	0.128872
	0	6.2128	0.173546		0	6.2128	0.153507
	0	6.22304	0.170853		0	6.22304	0.13681
	0	6.23328	0.175392		0	6.23328	0.113285
	0	6.24352	0.230911		0	6.24352	0.117363
	0	6.25376	0.209766		0	6.25376	0.117638
	0	6.264	0.208359		0	6.264	0.126343
	0	6.27424	0.228958		0	6.27424	0.117973
	0	6.28448	0.217422		0	6.28448	0.118023
	0	6.29472	0.220062		0	6.29472	0.0783195
	0	6.30496	0.221493		0	6.30496	0.0735626
	0	6.3152	0.21637		0	6.3152	0.0803795
	0	6.32544	0.219856		0	6.32544	0.109081
	0	6.33568	0.19199		0	6.33568	0.0919418
	0	6.34592	0.174835		0	6.34592	0.0967331
	0	6.35616	0.165421		0	6.35616	0.0645447
	0	6.3664	0.191315		0	6.3664	0.0760422
	0	6.37664	0.186871		0	6.37664	0.0715103
	0	6.38688	0.188709		0	6.38688	0.0693512
	0	6.39712	0.183174		0	6.39712	0.0589027
	0	6.40736	0.1912		0	6.40736	0.0502052
	0	6.4176	0.174976		0	6.4176	0.0217819
	0	6.42784	0.167812		0	6.42784	0.036293
	0	6.43808	0.157742		0	6.43808	0.0814133
	0	6.44832	0.161747		0	6.44832	0.0733604
	0	6.45856	0.208561		0	6.45856	0.071907
	0	6.4688	0.229698		0	6.4688	0.100258
	0	6.47904	0.224754		0	6.47904	0.122604
	0	6.48928	0.234188		0	6.48928	0.135117
	0	6.49952	0.274994		0	6.49952	0.105995
	0	6.50976	0.264309		0	6.50976	0.0884933
	0	6.52	0.263443		0	6.52	0.0895042
	0	6.53024	0.266479		0	6.53024	0.0923119
	0	6.54048	0.245228		0	6.54048	0.081459
	0	6.55072	0.221325		0	6.55072	0.0709152
	0	6.56096	0.195267		0	6.56096	0.0686874
	0	6.5712	0.166885		0	6.5712	0.0575905
	0	6.58144	0.178589		0	6.58144	0.0629807
	0	6.59168	0.196548		0	6.59168	0.0607567
	0	6.60192	0.200233		0	6.60192	0.0497856
	0	6.61216	0.178772		0	6.61216	0.0636826
	0	6.6224	0.181576		0	6.6224	0.0684128
	0	6.63264	0.196838		0	6.63264	0.0620956
	0	6.64288	0.215874		0	6.64288	0.0806808
	0	6.65312	0.196724		0	6.65312	0.109947
	0	6.66336	0.222851		0	6.66336	0.125259
	0	6.6736	0.214497		0	6.6736	0.0851402
	0	6.68384	0.216026		0	6.68384	0.0995216
	0	6.69408	0.215858		0	6.69408	0.101513
	0	6.70432	0.189041		0	6.70432	0.124699
	0	6.71456	0.21394		0	6.71456	0.102768
	0	6.7248	0.230091		0	6.7248	0.0931358
	0	6.73504	0.214813		0	6.73504	0.0789642
	0	6.74528	0.202995		0	6.74528	0.0738754
	0	6.75552	0.207905		0	6.75552	0.103722
	0	6.76576	0.211185		0	6.76576	0.0984879
	0	6.776	0.182346		0	6.776	0.121849
	0	6.78624	0.178955		0	6.78624	0.126728
	0	6.79648	0.202084		0	6.79648	0.105305
	0	6.80672	0.242489		0	6.80672	0.0608406
	0	6.81696	0.263714		0	6.81696	0.048584
	0	6.8272	0.221672		0	6.8272	0.0540924
	0	6.83744	0.207077		0	6.83744	0.0605888
	0	6.84768	0.218708		0	6.84768	0.0650101
	0	6.85792	0.183327		0	6.85792	0.057972
	0	6.86816	0.136978		0	6.86816	0.0610733
	0	6.8784	0.125973		0	6.8784	0.0499077
	0	6.88864	0.127686		0	6.88864	0.060688
	0	6.89888	0.102783		0	6.89888	0.0636826
	0	6.90912	0.119011		0	6.90912	0.0728722
	0	6.91936	0.12442		0	6.91936	0.0905495
	0	6.9296	0.108063		0	6.9296	0.110603
	0	6.93984	0.133942		0	6.93984	0.130455
	0	6.95008	0.166885		0	6.95008	0.120758
	0	6.96032	0.162403		0	6.96032	0.150654
	0	6.97056	0.172279		0	6.97056	0.168114
	0	6.9808	0.167999		0	6.9808	0.148735
	0	6.99104	0.179138		0	6.99104	0.133492
	0	7.00128	0.176826		0	7.00128	0.128754
	0	7.01152	0.168301		0	7.01152	0.153038
	0	7.02176	0.172226		0	7.02176	0.121975
	0	7.032	0.160725		0	7.032	0.104961
	0	7.04224	0.168369		0	7.04224	0.0920792
	0	7.05248	0.187534		0	7.05248	0.109337
	0	7.06272	0.166779		0	7.06272	0.129665
	0	7.07296	0.140114		0	7.07296	0.136364
	0	7.0832	0.140564		0	7.0832	0.157402
	0	7.09344	0.162643		0	7.09344	0.1674
	0	7.10368	0.166405		0	7.10368	0.14283
	0	7.11392	0.127991		0	7.11392	0.159245
	0	7.12416	0.146469		0	7.12416	0.145393
	0	7.1344	0.140537		0	7.1344	0.11734
	0	7.14464	0.153595		0	7.14464	0.122646
	0	7.15488	0.131763		0	7.15488	0.103832
	0	7.16512	0.0945549		0	7.16512	0.0896797
	0	7.17536	0.0759315		0	7.17536	0.075161
	0	7.1856	0.0969849		0	7.1856	0.0848618
	0	7.19584	0.133614		0	7.19584	0.0902252
	0	7.20608	0.146126		0	7.20608	0.0620041
	0	7.21632	0.172531		0	7.21632	0.0136452
	0	7.22656	0.181454		0	7.22656	-0.00776291
	0	7.2368	0.157448		0	7.2368	-0.031456
	0	7.24704	0.126408		0	7.24704	-0.0546799
	0	7.25728	0.14814		0	7.25728	-0.0467682
	0	7.26752	0.145859		0	7.26752	-0.0504074
	0	7.27776	0.139015		0	7.27776	-0.0706444
	0	7.288	0.126732		0	7.288	-0.0917587
	0	7.29824	0.124763		0	7.29824	-0.122379
	0	7.30848	0.126724		0	7.30848	-0.154087
	0	7.31872	0.161835		0	7.31872	-0.167007
	0	7.32896	0.127655		0	7.32896	-0.175468
	0	7.3392	0.0703545		0	7.3392	-0.188206
	0	7.34944	0.0979271		0	7.34944	-0.20335
	0	7.35968	0.144726		0	7.35968	-0.209911
	0	7.36992	0.134129		0	7.36992	-0.219261
	0	7.38016	0.0869179		0	7.38016	-0.235767
	0	7.3904	0.0762291		0	7.3904	-0.249947
	0	7.40064	0.0741959		0	7.40064	-0.230156
	0	7.41088	0.0429993		0	7.41088	-0.206192
	0	7.42112	0.0456657		0	7.42112	-0.209435
	0	7.43136	0.0596619		0	7.43136	-0.173401
	0	7.4416	0.0752563		0	7.4416	-0.143166
	0	7.45184	0.0744133		0	7.45184	-0.139248
	0	7.46208	0.0400391		0	7.46208	-0.119995
	0	7.47232	0.0624275		0	7.47232	-0.129215
	0	7.48256	0.110458		0	7.48256	-0.083107
	0	7.4928	0.129379		0	7.4928	-0.0257034
	0	7.50304	0.0633812		0	7.50304	-0.00681305
	0	7.51328	0.0603638		0	7.51328	0.0237923
	0	7.52352	0.114174		0	7.52352	0.0656929
	0	7.53376	0.125305		0	7.53376	0.0917778
	0	7.544	0.126186		0	7.544	0.0989532
	0	7.55424	0.159019		0	7.55424	0.0910149
	0	7.56448	0.133812		0	7.56448	0.112698
	0	7.57472	0.144089		0	7.57472	0.115162
	0	7.58496	0.142792		0	7.58496	0.133476
	0	7.5952	0.130295		0	7.5952	0.138687
	0	7.60544	0.126369		0	7.60544	0.148434
	0	7.61568	0.140842		0	7.61568	0.157234
	0	7.62592	0.121796		0	7.62592	0.175362
	0	7.63616	0.0930748		0	7.63616	0.170033
	0	7.6464	0.0883026		0	7.6464	0.183628
	0	7.65664	0.110123		0	7.65664	0.13369
	0	7.66688	0.108917		0	7.66688	0.123627
	0	7.67712	0.0775299		0	7.67712	0.167404
	0	7.68736	0.0923615		0	7.68736	0.168343
	0	7.6976	0.13028		0	7.6976	0.161079
	0	7.70784	0.108414		0	7.70784	0.161842
	0	7.71808	0.0853577		0	7.71808	0.14608
	0	7.72832	0.0810242		0	7.72832	0.128025
	0	7.73856	0.0949554		0	7.73856	0.143738
	0	7.7488	0.08395		0	7.7488	0.155628
	0	7.75904	0.0722809		0	7.75904	0.179577
	0	7.76928	0.0582504		0	7.76928	0.183868
	0	7.77952	0.0436172		0	7.77952	0.201244
	0	7.78976	0.00110245		0	7.78976	0.193882
	0	7.8	-0.0391045		0	7.8	0.162014
	0	7.81024	-0.036911		0	7.81024	0.159225
	0	7.82048	-0.0190086		0	7.82048	0.182297
	0	7.83072	-0.0351677		0	7.83072	0.190052
	0	7.84096	-0.0498466		0	7.84096	0.188953
	0	7.8512	-0.0549164		0	7.8512	0.19392
	0	7.86144	-0.0714531		0	7.86144	0.176205
	0	7.87168	-0.104172		0	7.87168	0.151154
	0	7.88192	-0.116741		0	7.88192	0.135857
	0	7.89216	-0.0988922		0	7.89216	0.127785
	0	7.9024	-0.094101		0	7.9024	0.135574
	0	7.91264	-0.0968742		0	7.91264	0.144981
	0	7.92288	-0.09021		0	7.92288	0.131676
	0	7.93312	-0.0827675		0	7.93312	0.150742
	0	7.94336	-0.0508957		0	7.94336	0.164497
	0	7.9536	-0.0538254		0	7.9536	0.146122
	0	7.96384	-0.0929222		0	7.96384	0.123386
	0	7.97408	-0.110519		0	7.97408	0.0958557
	0	7.98432	-0.0647621		0	7.98432	0.0575943
	0	7.99456	-0.067749		0	7.99456	0.0356674
	0	8.0048	-0.100403		0	8.0048	0.0567474
	0	8.01504	-0.0952148		0	8.01504	0.0659142
	0	8.02528	-0.0818253		0	8.02528	0.0948868
	0	8.03552	-0.0776825		0	8.03552	0.113525
	0	8.04576	-0.0760231		0	8.04576	0.0828819
	0	8.056	-0.0670013		0	8.056	0.0790062
	0	8.06624	-0.0502014		0	8.06624	0.0704041
	0	8.07648	-0.0286598		0	8.07648	0.0623131
	0	8.08672	-0.0714417		0	8.08672	0.0500145
	0	8.09696	-0.0634575		0	8.09696	0.0458755
	0	8.1072	-0.0675392		0	8.1072	0.0156822
	0	8.11744	-0.017189		0	8.11744	0.0426559
	0	8.12768	0.0271492		0	8.12768	0.0601654
	0	8.13792	0.0362206		0	8.13792	0.0588608
	0	8.14816	0.0757561		0	8.14816	0.045845
	0	8.1584	0.063549		0	8.1584	0.0147743
	0	8.16864	0.0752487		0	8.16864	0.0264511
	0	8.17888	0.0726585		0	8.17888	0.0502663
	0	8.18912	0.118366		0	8.18912	0.0630875
	0	8.19936	0.121395		0	8.19936	0.0622559
	0	8.2096	0.121845		0	8.2096	0.0230293
	0	8.21984	0.158489		0	8.21984	0.0143051
	0	8.23008	0.182083		0	8.23008	-0.0137825
	0	8.24032	0.19083		0	8.24032	-0.0127487
	0	8.25056	0.184097		0	8.25056	-0.0161896
	0	8.2608	0.186398		0	8.2608	0.00543976
	0	8.27104	0.163967		0	8.27104	0.0283318
	0	8.28128	0.167877		0	8.28128	0.0187912
	0	8.29152	0.17691		0	8.29152	0.0102806
	0	8.30176	0.208992		0	8.30176	-0.00613403
	0	8.312	0.191029		0	8.312	-0.0341644
	0	8.32224	0.198128		0	8.32224	-0.0382843
	0	8.33248	0.152626		0	8.33248	-0.041935
	0	8.34272	0.167027		0	8.34272	-0.0539589
	0	8.35296	0.162735		0	8.35296	-0.040554
	0	8.3632	0.142471		0	8.3632	-0.0642929
	0	8.37344	0.145901		0	8.37344	-0.0800247
	0	8.38368	0.182053		0	8.38368	-0.0621414
	0	8.39392	0.191574		0	8.39392	-0.0569878
	0	8.40416	0.191765		0	8.40416	-0.0743332
	0	8.4144	0.198914		0	8.4144	-0.073143
	0	8.42464	0.194851		0	8.42464	-0.0664368
	0	8.43488	0.192692		0	8.43488	-0.047699
	0	8.44512	0.195206		0	8.44512	-0.0186462
	0	8.45536	0.183784		0	8.45536	-0.0499306
	0	8.4656	0.161041		0	8.4656	-0.0403481
	0	8.47584	0.153461		0	8.47584	-0.0346184
	0	8.48608	0.154423		0	8.48608	-0.0594406
	0	8.49632	0.150642		0	8.49632	-0.0752983
	0	8.50656	0.134895		0	8.50656	-0.100822
	0	8.5168	0.169422		0	8.5168	-0.134869
	0	8.52704	0.216064		0	8.52704	-0.129967
	0	8.53728	0.216095		0	8.53728	-0.124546
	0	8.54752	0.198383		0	8.54752	-0.10424
	0	8.55776	0.168079		0	8.55776	-0.106655
	0	8.568	0.197929		0	8.568	-0.0968056
	0	8.57824	0.205231		0	8.57824	-0.123348
	0	8.58848	0.196869		0	8.58848	-0.151512
	0	8.59872	0.173401		0	8.59872	-0.157986
	0	8.60896	0.207203		0	8.60896	-0.169983
	0	8.6192	0.20187		0	8.6192	-0.147465
	0	8.62944	0.173813		0	8.62944	-0.153206
	0	8.63968	0.171577		0	8.63968	-0.121353
	0	8.64992	0.160004		0	8.64992	-0.0886879
	0	8.66016	0.13047		0	8.66016	-0.0851097
	0	8.6704	0.0837097		0	8.6704	-0.0752182
	0	8.68064	0.0895271		0	8.68064	-0.094532
	0	8.69088	0.0884743		0	8.69088	-0.0926399
	0	8.70112	0.0864258		0	8.70112	-0.0661812
	0	8.71136	0.115841		0	8.71136	-0.0541954
	0	8.7216	0.116257		0	8.7216	-0.0691452
	0	8.73184	0.115395		0	8.73184	-0.0883827
	0	8.74208	0.103519		0	8.74208	-0.0916176
	0	8.75232	0.107449		0	8.75232	-0.0795822
	0	8.76256	0.100086		0	8.76256	-0.077446
	0	8.7728	0.0859337		0	8.7728	-0.0996857
	0	8.78304	0.109257		0	8.78304	-0.107193
	0	8.79328	0.0974464		0	8.79328	-0.112007
	0	8.80352	0.121002		0	8.80352	-0.0713234
	0	8.81376	0.0950623		0	8.81376	-0.0804329
	0	8.824	0.118107		0	8.824	-0.0731049
	0	8.83424	0.11866		0	8.83424	-0.0802994
	0	8.84448	0.10154		0	8.84448	-0.0822334
	0	8.85472	0.0843658		0	8.85472	-0.0696297
	0	8.86496	0.0949402		0	8.86496	-0.0983582
	0	8.8752	0.0799484		0	8.8752	-0.0927544
	0	8.88544	0.073391		0	8.88544	-0.100975
	0	8.89568	0.0854073		0	8.89568	-0.0793571
	0	8.90592	0.11496		0	8.90592	-0.0652237
	0	8.91616	0.103546		0	8.91616	-0.0384674
	0	8.9264	0.101288		0	8.9264	-0.0431557
	0	8.93664	0.107864		0	8.93664	-0.0639992
	0	8.94688	0.0915718		0	8.94688	-0.0809174
	0	8.95712	0.0991058		0	8.95712	-0.0834427
	0	8.96736	0.084095		0	8.96736	-0.0866852
	0	8.9776	0.0762711		0	8.9776	-0.0777359
	0	8.98784	0.0664024		0	8.98784	-0.084465
	0	8.99808	0.0855293		0	8.99808	-0.0689163
	0	9.00832	0.0851707		0	9.00832	-0.053215
	0	9.01856	0.0632477		0	9.01856	-0.0396233
	0	9.0288	0.0243568		0	9.0288	-0.0278206
	0	9.03904	0.0155792		0	9.03904	-0.0621109
	0	9.04928	0.0414124		0	9.04928	-0.125637
	0	9.05952	0.0457687		0	9.05952	-0.126472
	0	9.06976	0.0316696		0	9.06976	-0.099865
	0	9.08	0.0149956		0	9.08	-0.109924
	0	9.09024	0.0230598		0	9.09024	-0.101219
	0	9.10048	0.0479889		0	9.10048	-0.0479355
	0	9.11072	0.0470581		0	9.11072	-0.036396
	0	9.12096	0.047451		0	9.12096	-0.0625687
	0	9.1312	0.0481567		0	9.1312	-0.0659294
	0	9.14144	0.0493202		0	9.14144	-0.0809364
	0	9.15168	0.0477715		0	9.15168	-0.110931
	0	9.16192	0.0444984		0	9.16192	-0.144085
	0	9.17216	0.0527687		0	9.17216	-0.161205
	0	9.1824	0.0541153		0	9.1824	-0.13525
	0	9.19264	0.0388031		0	9.19264	-0.158455
	0	9.20288	0.0395889		0	9.20288	-0.135273
	0	9.21312	0.0334435		0	9.21312	-0.107407
	0	9.22336	0.0720787		0	9.22336	-0.113655
	0	9.2336	0.0999107		0	9.2336	-0.123421
	0	9.24384	0.0958595		0	9.24384	-0.160042
	0	9.25408	0.0797005		0	9.25408	-0.122276
	0	9.26432	0.0768585		0	9.26432	-0.110703
	0	9.27456	0.0760994		0	9.27456	-0.110451
	0	9.2848	0.0808525		0	9.2848	-0.139404
	0	9.29504	0.062252		0	9.29504	-0.146107
	0	9.30528	0.0662918		0	9.30528	-0.136478
	0	9.31552	0.0424042		0	9.31552	-0.124249
	0	9.32576	0.0289803		0	9.32576	-0.134914
	0	9.336	0.0300293		0	9.336	-0.12603
	0	9.34624	0.0204926		0	9.34624	-0.122353
	0	9.35648	0.055233		0	9.35648	-0.127457
	0	9.36672	0.0469322		0	9.36672	-0.203503
	0	9.37696	0.0569229		0	9.37696	-0.206429
	0	9.3872	0.0737915		0	9.3872	-0.178371
	0	9.39744	0.0845947		0	9.39744	-0.13895
	0	9.40768	0.0674438		0	9.40768	-0.0818787
	0	9.41792	0.0492401		0	9.41792	-0.0660667
	0	9.42816	0.0643616		0	9.42816	-0.0663223
	0	9.4384	0.0762939		0	9.4384	-0.0931854
	0	9.44864	0.0804329		0	9.44864	-0.103607
	0	9.45888	0.0824699		0	9.45888	-0.114552
	0	9.46912	0.0981674		0	9.46912	-0.119335
	0	9.47936	0.107742		0	9.47936	-0.110435
	0	9.4896	0.0918655		0	9.4896	-0.0984383
	0	9.49984	0.0599365		0	9.49984	-0.0965652
	0	9.51008	0.0510101		0	9.51008	-0.0768661
	0	9.52032	0.0632706		0	9.52032	-0.0708733
	0	9.53056	0.0677223		0	9.53056	-0.052803
	0	9.5408	0.0536385		0	9.5408	-0.0605087
	0	9.55104	0.0421524		0	9.55104	-0.0488472
	0	9.56128	0.0517769		0	9.56128	-0.0305367
	0	9.57152	0.0773163		0	9.57152	-0.0442238
	0	9.58176	0.0721588		0	9.58176	-0.0533218
	0	9.592	0.0467682		0	9.592	-0.0254974
	0	9.60224	0.0476837		0	9.60224	0.0191879
	0	9.61248	0.025013		0	9.61248	0.0346909
	0	9.62272	-0.0246277		0	9.62272	0.0403099
	0	9.63296	-0.0186119		0	9.63296	0.0349274
	0	9.6432	0.00991821		0	9.6432	0.0303307
	0	9.65344	0.0460167		0	9.65344	0.0232124
	0	9.66368	0.0457191		0	9.66368	0.0259781
	0	9.67392	0.024231		0	9.67392	0.0297966
	0	9.68416	0.0143852		0	9.68416	0.0751724
	0	9.6944	0.025135		0	9.6944	0.0769119
	0	9.70464	0.0404358		0	9.70464	0.0581093
	0	9.71488	0.0580139		0	9.71488	0.052475
	0	9.72512	0.0577202		0	9.72512	0.0650253
	0	9.73536	0.0623627		0	9.73536	0.0608711
	0	9.7456	0.0747375		0	9.7456	0.0659142
	0	9.75584	0.0485191		0	9.75584	0.0515442
	0	9.76608	0.0494843		0	9.76608	0.0685196
	0	9.77632	0.0522308		0	9.77632	0.0822105
	0	9.78656	0.0308113		0	9.78656	0.068428
	0	9.7968	0.0291862		0	9.7968	0.0586472
	0	9.80704	0.0169258		0	9.80704	0.0187073
	0	9.81728	0.035656		0	9.81728	0.0127335
	0	9.82752	0.0239525		0	9.82752	0.0140572
	0	9.83776	0.0265961		0	9.83776	0.0358047
	0	9.848	0.0458717		0	9.848	0.03582
	0	9.85824	0.0475159		0	9.85824	0.0528336
	0	9.86848	0.0408745		0	9.86848	0.05439
	0	9.87872	0.0371361		0	9.87872	0.0560226
	0	9.88896	0.014534		0	9.88896	0.0625381
	0	9.8992	-0.00950623		0	9.8992	0.0873146
	0	9.90944	0.0373077		0	9.90944	0.0517197
	0	9.91968	0.0423431		0	9.91968	0.0408669
	0	9.92992	0.0343895		0	9.92992	0.0417442
	0	9.94016	0.00770569		0	9.94016	0.0516167
	0	9.9504	0.000900269		0	9.9504	0.0744553
	0	9.96064	0.0143356		0	9.96064	0.0802078
	0	9.97088	0.0142059		0	9.97088	0.0744553
	0	9.98112	0.0102501		0	9.98112	0.0545197
	0	9.99136	0.00802231		0	9.99136	0.0649681
	0	10.0016	0.011734		0	10.0016	0.100502
	0	10.0118	0.0418282		0	10.0118	0.13776
	0	10.0221	0.058403		0	10.0221	0.160179
	0	10.0323	0.0296326		0	10.0323	0.149471
	0	10.0426	-0.00280762		0	10.0426	0.128544
	0	10.0528	0.0299835		0	10.0528	0.127968
	0	10.063	0.041069		0	10.063	0.138226
	0	10.0733	-0.00195312		0	10.0733	0.121475
	0	10.0835	0.0145721		0	10.0835	0.10601
	0	10.0938	0.0294952		0	10.0938	0.0739822
	0	10.104	0.0694695		0	10.104	0.11586
	0	10.1142	0.0653458		0	10.1142	0.110611
	0	10.1245	0.0650749		0	10.1245	0.122448
	0	10.1347	0.0736618		0	10.1347	0.106869
	0	10.145	0.0894203		0	10.145	0.0901031
	0	10.1552	0.11631		0	10.1552	0.08004
	0	10.1654	0.130135		0	10.1654	0.0790062
	0	10.1757	0.130192		0	10.1757	0.0575142
	0	10.1859	0.146545		0	10.1859	0.0483055
	0	10.1962	0.116684		0	10.1962	0.0328789
	0	10.2064	0.132572		0	10.2064	0.022892
	0	10.2166	0.146439		0	10.2166	0.0324821
	0	10.2269	0.160137		0	10.2269	0.0360146
	0	10.2371	0.110744		0	10.2371	0.0419884
	0	10.2474	0.087101		0	10.2474	0.061058
	0	10.2576	0.10535		0	10.2576	0.0505714
	0	10.2678	0.106903		0	10.2678	0.0683212
	0	10.2781	0.1208		0	10.2781	0.0952454
	0	10.2883	0.143074		0	10.2883	0.0554008
	0	10.2986	0.12149		0	10.2986	0.0113373
	0	10.3088	0.085968		0	10.3088	0.0290565
	0	10.319	0.0872269		0	10.319	0.0367966
	0	10.3293	0.126358		0	10.3293	0.0427399
	0	10.3395	0.132252		0	10.3395	0.0685043
	0	10.3498	0.146255		0	10.3498	0.0693893
	0	10.36	0.128078		0	10.36	0.0766068
	0	10.3702	0.11647		0	10.3702	0.0607071
	0	10.3805	0.128284		0	10.3805	0.061676
	0	10.3907	0.139664		0	10.3907	0.0482063
	0	10.401	0.137192		0	10.401	0.0631943
	0	10.4112	0.114773		0	10.4112	0.046196
	0	10.4214	0.0895882		0	10.4214	0.0806351
	0	10.4317	0.090416		0	10.4317	0.100071
	0	10.4419	0.0902443		0	10.4419	0.0893936
	0	10.4522	0.114487		0	10.4522	0.0844498
	0	10.4624	0.119923		0	10.4624	0.0586891
	0	10.4726	0.127705		0	10.4726	0.0677681
	0	10.4829	0.156776		0	10.4829	0.0738297
	0	10.4931	0.168808		0	10.4931	0.0674362
	0	10.5034	0.161144		0	10.5034	0.0424271
	0	10.5136	0.156322		0	10.5136	0.0167694
	0	10.5238	0.142052		0	10.5238	0.00934601
	0	10.5341	0.156269		0	10.5341	0.0100708
	0	10.5443	0.143803		0	10.5443	-0.00595474
	0	10.5546	0.142933		0	10.5546	-0.0709457
	0	10.5648	0.157211		0	10.5648	-0.111233
	0	10.575	0.154068		0	10.575	-0.122082
	0	10.5853	0.155891		0	10.5853	-0.132565
	0	10.5955	0.149506		0	10.5955	-0.154766
	0	10.6058	0.156937		0	10.6058	-0.204517
	0	10.616	0.162018		0	10.616	-0.215397
	0	10.6262	0.158028		0	10.6262	-0.196579
	0	10.6365	0.168476		0	10.6365	-0.209251
	0	10.6467	0.17474		0	10.6467	-0.229691
	0	10.657	0.188438		0	10.657	-0.215359
	0	10.6672	0.193687		0	10.6672	-0.213799
	0	10.6774	0.187363		0	10.6774	-0.24435
	0	10.6877	0.184967		0	10.6877	-0.278252
	0	10.6979	0.152592		0	10.6979	-0.285259
	0	10.7082	0.106441		0	10.7082	-0.274437
	0	10.7184	0.112862		0	10.7184	-0.250725
	0	10.7286	0.155903		0	10.7286	-0.239861
	0	10.7389	0.186462		0	10.7389	-0.258663
	0	10.7491	0.199703		0	10.7491	-0.288242
	0	10.7594	0.182095		0	10.7594	-0.311905
	0	10.7696	0.171406		0	10.7696	-0.294617
	0	10.7798	0.176926		0	10.7798	-0.260414
	0	10.7901	0.176174		0	10.7901	-0.239521
	0	10.8003	0.170029		0	10.8003	-0.238834
	0	10.8106	0.185333		0	10.8106	-0.216782
	0	10.8208	0.203918		0	10.8208	-0.189125
	0	10.831	0.20805		0	10.831	-0.170021
	0	10.8413	0.163483		0	10.8413	-0.178352
	0	10.8515	0.132835		0	10.8515	-0.175785
	0	10.8618	0.156387		0	10.8618	-0.14019
	0	10.872	0.156139		0	10.872	-0.11533
	0	10.8822	0.160191		0	10.8822	-0.124889
	0	10.8925	0.18774		0	10.8925	-0.150726
	0	10.9027	0.253571		0	10.9027	-0.156139
	0	10.913	0.258293		0	10.913	-0.125469
	0	10.9232	0.245842		0	10.9232	-0.106396
	0	10.9334	0.226425		0	10.9334	-0.0764847
	0	10.9437	0.188885		0	10.9437	-0.0186691
	0	10.9539	0.174164		0	10.9539	-0.039463
	0	10.9642	0.190315		0	10.9642	-0.0246811
	0	10.9744	0.191223		0	10.9744	-0.00679779
	0	10.9846	0.193081		0	10.9846	-0.0178566
	0	10.9949	0.18256		0	10.9949	0.0166359
	0	11.0051	0.200619		0	11.0051	0.0367889
	0	11.0154	0.173782		0	11.0154	0.0473862
	0	11.0256	0.186459		0	11.0256	0.0394211
	0	11.0358	0.206722		0	11.0358	0.0965614
	0	11.0461	0.216801		0	11.0461	0.0753326
	0	11.0563	0.193893		0	11.0563	0.0586472
	0	11.0666	0.168671		0	11.0666	0.0482635
	0	11.0768	0.164204		0	11.0768	0.0333633
	0	11.087	0.197872		0	11.087	0.0194473
	0	11.0973	0.18671		0	11.0973	0.00810242
	0	11.1075	0.166645		0	11.1075	0.00862122
	0	11.1178	0.146465		0	11.1178	0.00328827
	0	11.128	0.139988		0	11.128	-0.00948334
	0	11.1382	0.117271		0	11.1382	-0.0229492
	0	11.1485	0.110909		0	11.1485	-0.0574188
	0	11.1587	0.107391		0	11.1587	-0.0515862
	0	11.169	0.11224		0	11.169	-0.0445938
	0	11.1792	0.127304		0	11.1792	-0.0316124
	0	11.1894	0.132748		0	11.1894	-0.019825
	0	11.1997	0.113998		0	11.1997	0.0095787
	0	11.2099	0.0807915		0	11.2099	-0.00529099
	0	11.2202	0.0618744		0	11.2202	-0.0100937
	0	11.2304	0.0477905		0	11.2304	-0.0296478
	0	11.2406	0.0314178		0	11.2406	-0.0396652
	0	11.2509	0.0371971		0	11.2509	-0.0518608
	0	11.2611	0.00212479		0	11.2611	-0.0496902
	0	11.2714	-0.00780487		0	11.2714	-0.0500107
	0	11.2816	0.00680923		0	11.2816	-0.0731201
	0	11.2918	-0.000213623		0	11.2918	-0.0757523
	0	11.3021	-0.021347		0	11.3021	-0.100418
	0	11.3123	-0.057682		0	11.3123	-0.10685
	0	11.3226	-0.0859756		0	11.3226	-0.0835342
	0	11.3328	-0.0892181		0	11.3328	-0.100658
	0	11.343	-0.0784569		0	11.343	-0.125546
	0	11.3533	-0.0626183		0	11.3533	-0.163002
	0	11.3635	-0.0483131		0	11.3635	-0.178947
	0	11.3738	-0.0521545		0	11.3738	-0.178185
	0	11.384	-0.0825768		0	11.384	-0.167202
	0	11.3942	-0.0534897		0	11.3942	-0.156807
	0	11.4045	-0.0350418		0	11.4045	-0.166801
	0	11.4147	-0.0128326		0	11.4147	-0.176353
	0	11.425	-0.00886154		0	11.425	-0.204636
	0	11.4352	-0.0100746		0	11.4352	-0.224297
	0	11.4454	-0.0130424		0	11.4454	-0.234337
	0	11.4557	0.00224304		0	11.4557	-0.212612
	0	11.4659	0.0276489		0	11.4659	-0.222488
	0	11.4762	0.0214844		0	11.4762	-0.191479
	0	11.4864	0.0523376		0	11.4864	-0.189293
	0	11.4966	0.0664825		0	11.4966	-0.189766
	0	11.5069	0.0392609		0	11.5069	-0.206779
	0	11.5171	0.0568237		0	11.5171	-0.251183
	0	11.5274	0.108604		0	11.5274	-0.290127
	0	11.5376	0.135208		0	11.5376	-0.262833
	0	11.5478	0.120869		0	11.5478	-0.258781
	0	11.5581	0.0776443		0	11.5581	-0.242416
	0	11.5683	0.0829048		0	11.5683	-0.245823
	0	11.5786	0.12344		0	11.5786	-0.245689
	0	11.5888	0.158886		0	11.5888	-0.237255
	0	11.599	0.15836		0	11.599	-0.222206
	0	11.6093	0.147858		0	11.6093	-0.2061
	0	11.6195	0.135551		0	11.6195	-0.211338
	0	11.6298	0.144482		0	11.6298	-0.223255
	0	11.64	0.145538		0	11.64	-0.215618
	0	11.6502	0.129135		0	11.6502	-0.212734
	0	11.6605	0.152321		0	11.6605	-0.231621
	0	11.6707	0.172604		0	11.6707	-0.220932
	0	11.681	0.200928		0	11.681	-0.230118
	0	11.6912	0.220184		0	11.6912	-0.216896
	0	11.7014	0.211567		0	11.7014	-0.238319
	0	11.7117	0.187954		0	11.7117	-0.251167
	0	11.7219	0.195194		0	11.7219	-0.25193
	0	11.7322	0.188683		0	11.7322	-0.189079
	0	11.7424	0.218941		0	11.7424	-0.163895
	0	11.7526	0.195618		0	11.7526	-0.177761
	0	11.7629	0.195747		0	11.7629	-0.19445
	0	11.7731	0.213188		0	11.7731	-0.157555
	0	11.7834	0.206436		0	11.7834	-0.128662
	0	11.7936	0.192863		0	11.7936	-0.136299
	0	11.8038	0.162701		0	11.8038	-0.117069
	0	11.8141	0.147346		0	11.8141	-0.123997
	0	11.8243	0.118111		0	11.8243	-0.156113
	0	11.8346	0.0995979		0	11.8346	-0.179485
	0	11.8448	0.119148		0	11.8448	-0.168915
	0	11.855	0.123299		0	11.855	-0.16967
	0	11.8653	0.0997276		0	11.8653	-0.154305
	0	11.8755	0.0783157		0	11.8755	-0.158939
	0	11.8858	0.0802536		0	11.8858	-0.140862
	0	11.896	0.0774536		0	11.896	-0.11552
	0	11.9062	0.107674		0	11.9062	-0.121117
	0	11.9165	0.111679		0	11.9165	-0.119827
	0	11.9267	0.0975533		0	11.9267	-0.131126
	0	11.937	0.0906525		0	11.937	-0.114601
	0	11.9472	0.0987778		0	11.9472	-0.111927
	0	11.9574	0.102924		0	11.9574	-0.0984116
	0	11.9677	0.0900192		0	11.9677	-0.096138
	0	11.9779	0.0835571		0	11.9779	-0.0985413
	0	11.9882	0.118973		0	11.9882	-0.0738297
	0	11.9984	0.092392		0	11.9984	-0.0809631
	2	3.00768	0.269745		2	3.00768	-0.0367928
	2	3.01792	0.294132		2	3.01792	-0.0406837
	2	3.02816	0.323837		2	3.02816	-0.029438
	2	3.0384	0.305157		2	3.0384	-0.0572815
	2	3.04864	0.311363		2	3.04864	-0.0656166
	2	3.05888	0.277298		2	3.05888	-0.0938835
	2	3.06912	0.299747		2	3.06912	-0.125591
	2	3.07936	0.296036		2	3.07936	-0.120014
	2	3.0896	0.257896		2	3.0896	-0.141914
	2	3.09984	0.277466		2	3.09984	-0.166328
	2	3.11008	0.279713		2	3.11008	-0.174236
	2	3.12032	0.31266		2	3.12032	-0.198376
	2	3.13056	0.306484		2	3.13056	-0.228977
	2	3.1408	0.301868		2	3.1408	-0.26619
	2	3.15104	0.26392		2	3.15104	-0.291462
	2	3.16128	0.262508		2	3.16128	-0.309914
	2	3.17152	0.279678		2	3.17152	-0.315132
	2	3.18176	0.303947		2	3.18176	-0.265778
	2	3.192	0.307125		2	3.192	-0.281582
	2	3.20224	0.318432		2	3.20224	-0.303638
	2	3.21248	0.321346		2	3.21248	-0.324177
	2	3.22272	0.336651		2	3.22272	-0.314224
	2	3.23296	0.340279		2	3.23296	-0.322803
	2	3.2432	0.324684		2	3.2432	-0.328339
	2	3.25344	0.316658		2	3.25344	-0.352356
	2	3.26368	0.30323		2	3.26368	-0.363537
	2	3.27392	0.293983		2	3.27392	-0.374622
	2	3.28416	0.281418		2	3.28416	-0.372543
	2	3.2944	0.247902		2	3.2944	-0.35273
	2	3.30464	0.238808		2	3.30464	-0.335602
	2	3.31488	0.207878		2	3.31488	-0.307686
	2	3.32512	0.191448		2	3.32512	-0.281544
	2	3.33536	0.202007		2	3.33536	-0.258648
	2	3.3456	0.188713		2	3.3456	-0.253056
	2	3.35584	0.197411		2	3.35584	-0.236362
	2	3.36608	0.224678		2	3.36608	-0.234798
	2	3.37632	0.210854		2	3.37632	-0.231922
	2	3.38656	0.20314		2	3.38656	-0.187527
	2	3.3968	0.201122		2	3.3968	-0.14542
	2	3.40704	0.213997		2	3.40704	-0.125687
	2	3.41728	0.220592		2	3.41728	-0.106152
	2	3.42752	0.156197		2	3.42752	-0.0892372
	2	3.43776	0.140553		2	3.43776	-0.0522957
	2	3.448	0.0981064		2	3.448	-0.0345192
	2	3.45824	0.0768623		2	3.45824	-0.0494461
	2	3.46848	0.117691		2	3.46848	-0.0508766
	2	3.47872	0.131786		2	3.47872	-0.0548744
	2	3.48896	0.117561		2	3.48896	-0.0298958
	2	3.4992	0.0950737		2	3.4992	-0.0313644
	2	3.50944	0.08881		2	3.50944	-0.00677109
	2	3.51968	0.0780296		2	3.51968	0.0124664
	2	3.52992	0.112095		2	3.52992	0.0154533
	2	3.54016	0.12722		2	3.54016	0.00915146
	2	3.5504	0.10022		2	3.5504	-0.0258751
	2	3.56064	0.0724869		2	3.56064	-0.039093
	2	3.57088	0.0515594		2	3.57088	-0.0315399
	2	3.58112	0.0508881		2	3.58112	-0.00195694
	2	3.59136	0.00419998		2	3.59136	0.00468445
	2	3.6016	0.00945282		2	3.6016	-0.00835037
	2	3.61184	0.0209732		2	3.61184	-0.00566483
	2	3.62208	0.00705719		2	3.62208	-0.00276566
	2	3.63232	0.0149269		2	3.63232	-0.0147781
	2	3.64256	0.0280342		2	3.64256	0.00318909
	2	3.6528	0.00668716		2	3.6528	-6.10352e-05
	2	3.66304	0.0188103		2	3.66304	-0.00535202
	2	3.67328	0.0366859		2	3.67328	0.0121384
	2	3.68352	0.0189743		2	3.68352	-0.00127029
	2	3.69376	0.0137062		2	3.69376	0.00267029
	2	3.704	-0.0114059		2	3.704	-0.0115242
	2	3.71424	-0.00840759		2	3.71424	-0.012413
	2	3.72448	-0.0105629		2	3.72448	-0.0330048
	2	3.73472	-0.000705719		2	3.73472	-0.0558548
	2	3.74496	-0.00983429		2	3.74496	-0.0780945
	2	3.7552	-0.0377388		2	3.7552	-0.056591
	2	3.76544	-0.0310745		2	3.76544	-0.0207062
	2	3.77568	-0.0250587		2	3.77568	-0.0383759
	2	3.78592	-0.023735		2	3.78592	-0.104298
	2	3.79616	-0.053154		2	3.79616	-0.163307
	2	3.8064	-0.0456772		2	3.8064	-0.156113
	2	3.81664	-0.0442886		2	3.81664	-0.122257
	2	3.82688	-0.0149002		2	3.82688	-0.129589
	2	3.83712	-0.0239716		2	3.83712	-0.129482
	2	3.84736	-0.0581512		2	3.84736	-0.133213
	2	3.8576	-0.0486641		2	3.8576	-0.15551
	2	3.86784	-0.0508881		2	3.86784	-0.172901
	2	3.87808	-0.0573654		2	3.87808	-0.152561
	2	3.88832	-0.0710983		2	3.88832	-0.13929
	2	3.89856	-0.0577545		2	3.89856	-0.139194
	2	3.9088	-0.0527077		2	3.9088	-0.140175
	2	3.91904	-0.0218544		2	3.91904	-0.133163
	2	3.92928	-0.0412064		2	3.92928	-0.130054
	2	3.93952	-0.0578308		2	3.93952	-0.143505
	2	3.94976	-0.0635757		2	3.94976	-0.136269
	2	3.96	-0.0716705		2	3.96	-0.160488
	2	3.97024	-0.0670662		2	3.97024	-0.190983
	2	3.98048	-0.0695038		2	3.98048	-0.191902
	2	3.99072	-0.0622101		2	3.99072	-0.215374
	2	4.00096	-0.0316429		2	4.00096	-0.166245
	2	4.0112	-0.0335236		2	4.0112	-0.134239
	2	4.02144	-0.0385017		2	4.02144	-0.130234
	2	4.03168	-0.0407944		2	4.03168	-0.155972
	2	4.04192	-0.039669		2	4.04192	-0.164906
	2	4.05216	-0.0134354		2	4.05216	-0.161575
	2	4.0624	-0.00976944		2	4.0624	-0.140636
	2	4.07264	-0.00529099		2	4.07264	-0.122585
	2	4.08288	0.011528		2	4.08288	-0.122589
	2	4.09312	0.0116959		2	4.09312	-0.145466
	2	4.10336	-0.0227585		2	4.10336	-0.136868
	2	4.1136	-0.0494919		2	4.1136	-0.145573
	2	4.12384	-0.0425415		2	4.12384	-0.171329
	2	4.13408	-0.017807		2	4.13408	-0.186813
	2	4.14432	0.0113297		2	4.14432	-0.137814
	2	4.15456	0.0254478		2	4.15456	-0.108917
	2	4.1648	0.0402641		2	4.1648	-0.0935097
	2	4.17504	0.0256691		2	4.17504	-0.0915146
	2	4.18528	0.0324707		2	4.18528	-0.102814
	2	4.19552	0.0264664		2	4.19552	-0.103348
	2	4.20576	-0.00572968		2	4.20576	-0.128231
	2	4.216	0.00245667		2	4.216	-0.121319
	2	4.22624	0.0207901		2	4.22624	-0.107449
	2	4.23648	0.0252457		2	4.23648	-0.0961533
	2	4.24672	0.0100479		2	4.24672	-0.111557
	2	4.25696	-0.000553131		2	4.25696	-0.130497
	2	4.2672	0.0111465		2	4.2672	-0.101303
	2	4.27744	0.0182686		2	4.27744	0.00226212
	2	4.28768	0.0224724		2	4.28768	0.0324364
	2	4.29792	0.0522728		2	4.29792	0.0172119
	2	4.30816	0.0548553		2	4.30816	0.0273247
	2	4.3184	0.011776		2	4.3184	0.0295448
	2	4.32864	0.018734		2	4.32864	0.0225296
	2	4.33888	0.0238991		2	4.33888	0.0298729
	2	4.34912	0.0225105		2	4.34912	0.04879
	2	4.35936	6.48499e-05		2	4.35936	0.0739059
	2	4.3696	0.00641632		2	4.3696	0.07201
	2	4.37984	0.0356369		2	4.37984	0.0534019
	2	4.39008	0.05159		2	4.39008	0.041317
	2	4.40032	0.0804062		2	4.40032	0.0464439
	2	4.41056	0.0587654		2	4.41056	0.0524406
	2	4.4208	0.0341721		2	4.4208	0.0388451
	2	4.43104	0.0352783		2	4.43104	0.0337372
	2	4.44128	0.0034523		2	4.44128	0.055645
	2	4.45152	-0.0145264		2	4.45152	0.0747032
	2	4.46176	-0.0211334		2	4.46176	0.0946808
	2	4.472	-0.0161896		2	4.472	0.0938644
	2	4.48224	-0.0319786		2	4.48224	0.0860329
	2	4.49248	-0.0232315		2	4.49248	0.0793457
	2	4.50272	-0.0201454		2	4.50272	0.106152
	2	4.51296	-0.0192719		2	4.51296	0.10997
	2	4.5232	-0.041069		2	4.5232	0.140652
	2	4.53344	-0.0693893		2	4.53344	0.103088
	2	4.54368	-0.0861969		2	4.54368	0.0907631
	2	4.55392	-0.0954514		2	4.55392	0.0804596
	2	4.56416	-0.0702362		2	4.56416	0.100529
	2	4.5744	-0.0816612		2	4.5744	0.131069
	2	4.58464	-0.0791702		2	4.58464	0.140457
	2	4.59488	-0.0700378		2	4.59488	0.0931282
	2	4.60512	-0.0414352		2	4.60512	0.0549126
	2	4.61536	-0.0253067		2	4.61536	0.0312881
	2	4.6256	-0.0468369		2	4.6256	0.0547562
	2	4.63584	-0.0736542		2	4.63584	0.0903473
	2	4.64608	-0.0731468		2	4.64608	0.116135
	2	4.65632	-0.0883102		2	4.65632	0.110348
	2	4.66656	-0.0638504		2	4.66656	0.112732
	2	4.6768	-0.0563202		2	4.6768	0.131954
	2	4.68704	-0.0345764		2	4.68704	0.12376
	2	4.69728	-0.0249176		2	4.69728	0.134953
	2	4.70752	-0.0361137		2	4.70752	0.124973
	2	4.71776	-0.052742		2	4.71776	0.133564
	2	4.728	-0.0370865		2	4.728	0.121944
	2	4.73824	-0.0406914		2	4.73824	0.12928
	2	4.74848	-0.0363503		2	4.74848	0.147243
	2	4.75872	-0.0194511		2	4.75872	0.107338
	2	4.76896	-0.0342522		2	4.76896	0.0861931
	2	4.7792	-0.0352516		2	4.7792	0.0613937
	2	4.78944	-0.0462532		2	4.78944	0.0753403
	2	4.79968	-0.0461502		2	4.79968	0.0345726
	2	4.80992	-0.0539169		2	4.80992	0.0192833
	2	4.82016	-0.0455666		2	4.82016	0.00440979
	2	4.8304	-0.0470238		2	4.8304	0.0433807
	2	4.84064	-0.0293198		2	4.84064	0.0462456
	2	4.85088	-0.0261765		2	4.85088	0.0553246
	2	4.86112	-0.00157928		2	4.86112	0.0590324
	2	4.87136	-0.00121307		2	4.87136	0.0370293
	2	4.8816	-0.0136795		2	4.8816	0.0462189
	2	4.89184	-0.00789642		2	4.89184	0.0505333
	2	4.90208	-0.0176277		2	4.90208	0.0378075
	2	4.91232	0.0166397		2	4.91232	0.0298653
	2	4.92256	0.0239944		2	4.92256	0.029583
	2	4.9328	0.0380211		2	4.9328	0.0387993
	2	4.94304	0.0319443		2	4.94304	0.0127983
	2	4.95328	0.0444984		2	4.95328	0.00461197
	2	4.96352	0.029808		2	4.96352	0.0214348
	2	4.97376	0.0266914		2	4.97376	0.0216866
	2	4.984	0.0369949		2	4.984	0.035778
	2	4.99424	0.0416565		2	4.99424	0.0198936
	2	5.00448	0.0439987		2	5.00448	0.00273895
	2	5.01472	0.0621376		2	5.01472	-0.00429153
	2	5.02496	0.0674744		2	5.02496	0.0231247
	2	5.0352	0.0447464		2	5.0352	-0.000671387
	2	5.04544	0.0587769		2	5.04544	-0.00858307
	2	5.05568	0.0885429		2	5.05568	0.00827408
	2	5.06592	0.077198		2	5.06592	0.0227814
	2	5.07616	0.0557175		2	5.07616	0.018856
	2	5.0864	0.0814438		2	5.0864	-0.0387459
	2	5.09664	0.0998459		2	5.09664	-0.0343399
	2	5.10688	0.113701		2	5.10688	-0.0125389
	2	5.11712	0.142509		2	5.11712	-0.0125465
	2	5.12736	0.131882		2	5.12736	-0.0243378
	2	5.1376	0.146019		2	5.1376	-0.0262146
	2	5.14784	0.140396		2	5.14784	-0.0320663
	2	5.15808	0.13905		2	5.15808	-0.0228767
	2	5.16832	0.155468		2	5.16832	-0.0425758
	2	5.17856	0.163834		2	5.17856	-0.0621529
	2	5.1888	0.149879		2	5.1888	-0.0495377
	2	5.19904	0.122444		2	5.19904	-0.0326462
	2	5.20928	0.11409		2	5.20928	-0.0490837
	2	5.21952	0.0948219		2	5.21952	-0.0635643
	2	5.22976	0.102951		2	5.22976	-0.0757637
	2	5.24	0.119987		2	5.24	-0.103451
	2	5.25024	0.100483		2	5.25024	-0.0940437
	2	5.26048	0.105263		2	5.26048	-0.100956
	2	5.27072	0.126183		2	5.27072	-0.107533
	2	5.28096	0.124973		2	5.28096	-0.153908
	2	5.2912	0.121933		2	5.2912	-0.130726
	2	5.30144	0.104263		2	5.30144	-0.152531
	2	5.31168	0.0940247		2	5.31168	-0.167736
	2	5.32192	0.10305		2	5.32192	-0.192875
	2	5.33216	0.0734406		2	5.33216	-0.196255
	2	5.3424	0.100105		2	5.3424	-0.181629
	2	5.35264	0.118736		2	5.35264	-0.199768
	2	5.36288	0.130241		2	5.36288	-0.21809
	2	5.37312	0.120335		2	5.37312	-0.245163
	2	5.38336	0.114845		2	5.38336	-0.238201
	2	5.3936	0.0966225		2	5.3936	-0.261063
	2	5.40384	0.104347		2	5.40384	-0.266937
	2	5.41408	0.120041		2	5.41408	-0.29454
	2	5.42432	0.0961189		2	5.42432	-0.299397
	2	5.43456	0.0966454		2	5.43456	-0.293293
	2	5.4448	0.110661		2	5.4448	-0.307358
	2	5.45504	0.130989		2	5.45504	-0.301033
	2	5.46528	0.132179		2	5.46528	-0.298576
	2	5.47552	0.100925		2	5.47552	-0.302296
	2	5.48576	0.122681		2	5.48576	-0.291866
	2	5.496	0.131126		2	5.496	-0.304882
	2	5.50624	0.104443		2	5.50624	-0.301533
	2	5.51648	0.101757		2	5.51648	-0.269447
	2	5.52672	0.0904846		2	5.52672	-0.261559
	2	5.53696	0.0938492		2	5.53696	-0.244091
	2	5.5472	0.0930748		2	5.5472	-0.234444
	2	5.55744	0.0717697		2	5.55744	-0.236275
	2	5.56768	0.070961		2	5.56768	-0.221577
	2	5.57792	0.0886574		2	5.57792	-0.216099
	2	5.58816	0.0885048		2	5.58816	-0.203243
	2	5.5984	0.121254		2	5.5984	-0.198792
	2	5.60864	0.108757		2	5.60864	-0.2024
	2	5.61888	0.11525		2	5.61888	-0.202717
	2	5.62912	0.0897408		2	5.62912	-0.189953
	2	5.63936	0.07864		2	5.63936	-0.174469
	2	5.6496	0.101429		2	5.6496	-0.167244
	2	5.65984	0.108078		2	5.65984	-0.185421
	2	5.67008	0.121063		2	5.67008	-0.153862
	2	5.68032	0.133171		2	5.68032	-0.162243
	2	5.69056	0.136318		2	5.69056	-0.191807
	2	5.7008	0.126965		2	5.7008	-0.184673
	2	5.71104	0.104458		2	5.71104	-0.156696
	2	5.72128	0.124542		2	5.72128	-0.100254
	2	5.73152	0.165222		2	5.73152	-0.114178
	2	5.74176	0.14983		2	5.74176	-0.13039
	2	5.752	0.100204		2	5.752	-0.151943
	2	5.76224	0.112617		2	5.76224	-0.138565
	2	5.77248	0.079258		2	5.77248	-0.133469
	2	5.78272	0.0634155		2	5.78272	-0.135036
	2	5.79296	0.0591087		2	5.79296	-0.155956
	2	5.8032	0.0580902		2	5.8032	-0.179966
	2	5.81344	0.0505257		2	5.81344	-0.164761
	2	5.82368	0.0464249		2	5.82368	-0.160889
	2	5.83392	0.0434265		2	5.83392	-0.154171
	2	5.84416	0.0303726		2	5.84416	-0.133331
	2	5.8544	0.0319595		2	5.8544	-0.12138
	2	5.86464	0.0348434		2	5.86464	-0.128716
	2	5.87488	0.0314445		2	5.87488	-0.111107
	2	5.88512	0.0885086		2	5.88512	-0.0770607
	2	5.89536	0.110493		2	5.89536	-0.0321312
	2	5.9056	0.0744896		2	5.9056	-0.0251923
	2	5.91584	0.0280533		2	5.91584	-0.0114479
	2	5.92608	-0.00400543		2	5.92608	-0.0596542
	2	5.93632	-0.0129089		2	5.93632	-0.100605
	2	5.94656	0.0210571		2	5.94656	-0.108067
	2	5.9568	0.019043		2	5.9568	-0.0980377
	2	5.96704	-0.0288925		2	5.96704	-0.0921364
	2	5.97728	-0.0235672		2	5.97728	-0.0807533
	2	5.98752	-0.0337296		2	5.98752	-0.0984039
	2	5.99776	-0.0434952		2	5.99776	-0.119881
	2	6.008	-0.0836716		2	6.008	-0.127941
	2	6.01824	-0.118412		2	6.01824	-0.101921
	2	6.02848	-0.139244		2	6.02848	-0.0979462
	2	6.03872	-0.134811		2	6.03872	-0.0932426
	2	6.04896	-0.125511		2	6.04896	-0.0878868
	2	6.0592	-0.0898705		2	6.0592	-0.0925064
	2	6.06944	-0.0886879		2	6.06944	-0.0922699
	2	6.07968	-0.0943146		2	6.07968	-0.090641
	2	6.08992	-0.118862		2	6.08992	-0.0974426
	2	6.10016	-0.13409		2	6.10016	-0.113651
	2	6.1104	-0.104546		2	6.1104	-0.132591
	2	6.12064	-0.0765152		2	6.12064	-0.131454
	2	6.13088	-0.0755844		2	6.13088	-0.117542
	2	6.14112	-0.0724792		2	6.14112	-0.0962677
	2	6.15136	-0.07901		2	6.15136	-0.0925674
	2	6.1616	-0.0787659		2	6.1616	-0.100719
	2	6.17184	-0.073967		2	6.17184	-0.132271
	2	6.18208	-0.0728378		2	6.18208	-0.14233
	2	6.19232	-0.0698547		2	6.19232	-0.139484
	2	6.20256	-0.0427628		2	6.20256	-0.110703
	2	6.2128	-0.0344124		2	6.2128	-0.0922928
	2	6.22304	-0.0485764		2	6.22304	-0.0953712
	2	6.23328	-0.0239792		2	6.23328	-0.102543
	2	6.24352	-0.00130463		2	6.24352	-0.0851021
	2	6.25376	0.0249786		2	6.25376	-0.0937347
	2	6.264	0.0277939		2	6.264	-0.0942078
	2	6.27424	0.000747681		2	6.27424	-0.0780754
	2	6.28448	-0.00514984		2	6.28448	-0.090229
	2	6.29472	0.0326233		2	6.29472	-0.0726051
	2	6.30496	0.0852089		2	6.30496	-0.0557594
	2	6.3152	0.0939407		2	6.3152	-0.0167542
	2	6.32544	0.0807114		2	6.32544	-0.0245056
	2	6.33568	0.082962		2	6.33568	-0.0262527
	2	6.34592	0.095356		2	6.34592	-0.0267448
	2	6.35616	0.0873528		2	6.35616	-0.0522423
	2	6.3664	0.082756		2	6.3664	-0.0661354
	2	6.37664	0.090065		2	6.37664	-0.0607338
	2	6.38688	0.10289		2	6.38688	-0.0940018
	2	6.39712	0.1133		2	6.39712	-0.116898
	2	6.40736	0.100735		2	6.40736	-0.143223
	2	6.4176	0.0905952		2	6.4176	-0.163036
	2	6.42784	0.109867		2	6.42784	-0.149441
	2	6.43808	0.0981674		2	6.43808	-0.121754
	2	6.44832	0.114487		2	6.44832	-0.135418
	2	6.45856	0.102531		2	6.45856	-0.126335
	2	6.4688	0.0929489		2	6.4688	-0.132767
	2	6.47904	0.10825		2	6.47904	-0.167576
	2	6.48928	0.127869		2	6.48928	-0.197971
	2	6.49952	0.102715		2	6.49952	-0.178211
	2	6.50976	0.0751724		2	6.50976	-0.172649
	2	6.52	0.0999374		2	6.52	-0.216114
	2	6.53024	0.111591		2	6.53024	-0.234238
	2	6.54048	0.101631		2	6.54048	-0.245934
	2	6.55072	0.0825195		2	6.55072	-0.22554
	2	6.56096	0.114799		2	6.56096	-0.220928
	2	6.5712	0.10825		2	6.5712	-0.228069
	2	6.58144	0.11718		2	6.58144	-0.20705
	2	6.59168	0.107632		2	6.59168	-0.200733
	2	6.60192	0.0767326		2	6.60192	-0.217136
	2	6.61216	0.0588951		2	6.61216	-0.210106
	2	6.6224	0.0395737		2	6.6224	-0.200317
	2	6.63264	0.0194054		2	6.63264	-0.222439
	2	6.64288	0.00822449		2	6.64288	-0.227001
	2	6.65312	0.0214615		2	6.65312	-0.201534
	2	6.66336	0.026825		2	6.66336	-0.211342
	2	6.6736	0.0259476		2	6.6736	-0.237057
	2	6.68384	-0.00537872		2	6.68384	-0.233162
	2	6.69408	0.0136681		2	6.69408	-0.199181
	2	6.70432	-0.0029335		2	6.70432	-0.183205
	2	6.71456	-0.000667572		2	6.71456	-0.185566
	2	6.7248	0.00153351		2	6.7248	-0.157593
	2	6.73504	-0.00231171		2	6.73504	-0.13641
	2	6.74528	-0.0267372		2	6.74528	-0.13802
	2	6.75552	-0.057724		2	6.75552	-0.109554
	2	6.76576	-0.0689163		2	6.76576	-0.0800667
	2	6.776	-0.0942917		2	6.776	-0.090992
	2	6.78624	-0.135338		2	6.78624	-0.0838661
	2	6.79648	-0.158375		2	6.79648	-0.0542336
	2	6.80672	-0.13694		2	6.80672	-0.0230484
	2	6.81696	-0.0966225		2	6.81696	-0.0269928
	2	6.8272	-0.101585		2	6.8272	-0.0353317
	2	6.83744	-0.0790482		2	6.83744	-0.0442657
	2	6.84768	-0.0658951		2	6.84768	-0.037014
	2	6.85792	-0.0660133		2	6.85792	0.00567245
	2	6.86816	-0.0790253		2	6.86816	0.071476
	2	6.8784	-0.0802765		2	6.8784	0.104477
	2	6.88864	-0.059063		2	6.88864	0.106335
	2	6.89888	-0.0550728		2	6.89888	0.0839996
	2	6.90912	-0.0589981		2	6.90912	0.109245
	2	6.91936	-0.0584259		2	6.91936	0.142281
	2	6.9296	-0.0728455		2	6.9296	0.118542
	2	6.93984	-0.0769997		2	6.93984	0.116879
	2	6.95008	-0.0754585		2	6.95008	0.137569
	2	6.96032	-0.0883865		2	6.96032	0.1721
	2	6.97056	-0.0738068		2	6.97056	0.211819
	2	6.9808	-0.0666771		2	6.9808	0.231651
	2	6.99104	-0.0778885		2	6.99104	0.229935
	2	7.00128	-0.0835762		2	7.00128	0.209846
	2	7.01152	-0.0654373		2	7.01152	0.240906
	2	7.02176	-0.0552025		2	7.02176	0.269001
	2	7.032	-0.0596733		2	7.032	0.253811
	2	7.04224	-0.0398331		2	7.04224	0.252449
	2	7.05248	-0.0195656		2	7.05248	0.244839
	2	7.06272	-0.0371208		2	7.06272	0.236961
	2	7.07296	-0.0401878		2	7.07296	0.223293
	2	7.0832	-0.0179329		2	7.0832	0.207836
	2	7.09344	0.0105858		2	7.09344	0.14452
	2	7.10368	0.0112381		2	7.10368	0.117184
	2	7.11392	-0.00734711		2	7.11392	0.102074
	2	7.12416	-0.0207901		2	7.12416	0.0943336
	2	7.1344	-0.0291824		2	7.1344	0.0746346
	2	7.14464	0.00379944		2	7.14464	0.0659065
	2	7.15488	0.0295982		2	7.15488	0.0565758
	2	7.16512	0.0165367		2	7.16512	0.0642548
	2	7.17536	0.00859833		2	7.17536	0.0956917
	2	7.1856	0.00263596		2	7.1856	0.0840721
	2	7.19584	0.00806427		2	7.19584	0.0667877
	2	7.20608	0.00948715		2	7.20608	0.0677032
	2	7.21632	-0.0220184		2	7.21632	0.0651627
	2	7.22656	-0.0265541		2	7.22656	0.0668182
	2	7.2368	-0.0109673		2	7.2368	0.0556335
	2	7.24704	0.0176163		2	7.24704	0.0803947
	2	7.25728	0.0348625		2	7.25728	0.0412102
	2	7.26752	0.0474358		2	7.26752	0.0049324
	2	7.27776	0.0381813		2	7.27776	-0.0140839
	2	7.288	0.0114708		2	7.288	-0.0280342
	2	7.29824	0.0410118		2	7.29824	0.0118866
	2	7.30848	0.061058		2	7.30848	0.0159416
	2	7.31872	0.088974		2	7.31872	-0.0085144
	2	7.32896	0.0895042		2	7.32896	-0.0281258
	2	7.3392	0.0776482		2	7.3392	-0.0437164
	2	7.34944	0.0590134		2	7.34944	-0.0388908
	2	7.35968	0.0363045		2	7.35968	-0.0546417
	2	7.36992	0.0504913		2	7.36992	-0.0543137
	2	7.38016	0.0825577		2	7.38016	-0.0533638
	2	7.3904	0.103828		2	7.3904	-0.0705643
	2	7.40064	0.128769		2	7.40064	-0.052021
	2	7.41088	0.141659		2	7.41088	-0.0685043
	2	7.42112	0.103767		2	7.42112	-0.0888634
	2	7.43136	0.0609207		2	7.43136	-0.0908661
	2	7.4416	0.025753		2	7.4416	-0.0918884
	2	7.45184	0.00775146		2	7.45184	-0.0916634
	2	7.46208	0.00656891		2	7.46208	-0.0740318
	2	7.47232	0.0322952		2	7.47232	-0.0816116
	2	7.48256	0.0652885		2	7.48256	-0.119442
	2	7.4928	0.0704346		2	7.4928	-0.123119
	2	7.50304	0.0887413		2	7.50304	-0.0957108
	2	7.51328	0.0911484		2	7.51328	-0.0922508
	2	7.52352	0.0768089		2	7.52352	-0.117165
	2	7.53376	0.0652847		2	7.53376	-0.128452
	2	7.544	0.0696793		2	7.544	-0.0943642
	2	7.55424	0.0648766		2	7.55424	-0.126591
	2	7.56448	0.0736618		2	7.56448	-0.102093
	2	7.57472	0.0663681		2	7.57472	-0.0758286
	2	7.58496	0.0712242		2	7.58496	-0.091114
	2	7.5952	0.113899		2	7.5952	-0.0989914
	2	7.60544	0.140957		2	7.60544	-0.0768433
	2	7.61568	0.0713425		2	7.61568	-0.059803
	2	7.62592	0.0357933		2	7.62592	-0.0502815
	2	7.63616	0.0689468		2	7.63616	-0.0720482
	2	7.6464	0.0876846		2	7.6464	-0.104351
	2	7.65664	0.0558357		2	7.65664	-0.122585
	2	7.66688	0.0461655		2	7.66688	-0.128395
	2	7.67712	0.0680008		2	7.67712	-0.127777
	2	7.68736	0.0754814		2	7.68736	-0.0886497
	2	7.6976	0.0689545		2	7.6976	-0.0648842
	2	7.70784	0.0578575		2	7.70784	-0.0660172
	2	7.71808	0.054348		2	7.71808	-0.0777664
	2	7.72832	0.040184		2	7.72832	-0.0994339
	2	7.73856	0.0406761		2	7.73856	-0.109764
	2	7.7488	0.0261345		2	7.7488	-0.11684
	2	7.75904	0.0368118		2	7.75904	-0.0634041
	2	7.76928	0.019722		2	7.76928	-0.0216408
	2	7.77952	0.0254784		2	7.77952	-0.0148506
	2	7.78976	0.0509682		2	7.78976	-0.0275841
	2	7.8	0.0518036		2	7.8	-0.0315666
	2	7.81024	0.0317764		2	7.81024	-0.0125198
	2	7.82048	0.059864		2	7.82048	-0.0113869
	2	7.83072	0.0882492		2	7.83072	-0.0203819
	2	7.84096	0.07938		2	7.84096	-0.0405006
	2	7.8512	0.0931473		2	7.8512	-0.00582886
	2	7.86144	0.122555		2	7.86144	-0.003685
	2	7.87168	0.0910759		2	7.87168	0.00582504
	2	7.88192	0.0884247		2	7.88192	0.00645065
	2	7.89216	0.0838547		2	7.89216	0.0385399
	2	7.9024	0.0495033		2	7.9024	0.0603371
	2	7.91264	0.0123291		2	7.91264	0.0267563
	2	7.92288	0.0265617		2	7.92288	0.0131531
	2	7.93312	0.0571365		2	7.93312	-0.0022049
	2	7.94336	0.0695038		2	7.94336	0.0240288
	2	7.9536	0.083828		2	7.9536	0.0280075
	2	7.96384	0.0678139		2	7.96384	0.0549507
	2	7.97408	0.0531044		2	7.97408	0.0748138
	2	7.98432	0.0414352		2	7.98432	0.0594368
	2	7.99456	0.047596		2	7.99456	0.023922
	2	8.0048	0.0403938		2	8.0048	0.0393867
	2	8.01504	0.0590858		2	8.01504	0.0433235
	2	8.02528	0.0457077		2	8.02528	0.0383644
	2	8.03552	0.0649033		2	8.03552	0.0198479
	2	8.04576	0.0466805		2	8.04576	0.00922012
	2	8.056	0.0448494		2	8.056	0.00369644
	2	8.06624	0.0615005		2	8.06624	-0.00249863
	2	8.07648	0.0695763		2	8.07648	0.00219345
	2	8.08672	0.0599251		2	8.08672	0.0106316
	2	8.09696	0.00780106		2	8.09696	0.0142708
	2	8.1072	-0.000545502		2	8.1072	0.0235825
	2	8.11744	-0.0228653		2	8.11744	0.0426445
	2	8.12768	0.00206757		2	8.12768	0.0344009
	2	8.13792	0.00012207		2	8.13792	0.053772
	2	8.14816	-0.0179787		2	8.14816	0.0507774
	2	8.1584	-0.0445862		2	8.1584	0.0249519
	2	8.16864	-0.0701256		2	8.16864	0.0122719
	2	8.17888	-0.0504074		2	8.17888	-0.015461
	2	8.18912	-0.0737648		2	8.18912	-0.0169449
	2	8.19936	-0.0871811		2	8.19936	-0.0194397
	2	8.2096	-0.0766983		2	8.2096	-0.0192833
	2	8.21984	-0.0764847		2	8.21984	0.00875854
	2	8.23008	-0.0600929		2	8.23008	0.0358543
	2	8.24032	-0.0761795		2	8.24032	0.0282249
	2	8.25056	-0.107418		2	8.25056	-0.00282669
	2	8.2608	-0.103355		2	8.2608	0.00111008
	2	8.27104	-0.10696		2	8.27104	-0.00122452
	2	8.28128	-0.116169		2	8.28128	-0.0100975
	2	8.29152	-0.112099		2	8.29152	-0.0166092
	2	8.30176	-0.115166		2	8.30176	0.0100327
	2	8.312	-0.12693		2	8.312	-0.00839615
	2	8.32224	-0.129044		2	8.32224	-0.0197296
	2	8.33248	-0.143402		2	8.33248	-0.0390053
	2	8.34272	-0.142139		2	8.34272	-0.0342751
	2	8.35296	-0.130417		2	8.35296	-0.0721016
	2	8.3632	-0.139603		2	8.3632	-0.0969658
	2	8.37344	-0.129753		2	8.37344	-0.0860977
	2	8.38368	-0.0943985		2	8.38368	-0.0531998
	2	8.39392	-0.0880852		2	8.39392	-0.0332718
	2	8.40416	-0.0918503		2	8.40416	-0.0678864
	2	8.4144	-0.130074		2	8.4144	-0.0778084
	2	8.42464	-0.107796		2	8.42464	-0.0821419
	2	8.43488	-0.0775261		2	8.43488	-0.0659218
	2	8.44512	-0.059166		2	8.44512	-0.0657768
	2	8.45536	-0.0515366		2	8.45536	-0.0845718
	2	8.4656	-0.0819016		2	8.4656	-0.0448418
	2	8.47584	-0.0950012		2	8.47584	-0.00687408
	2	8.48608	-0.103424		2	8.48608	-0.0235252
	2	8.49632	-0.0613022		2	8.49632	-0.0255852
	2	8.50656	-0.0380821		2	8.50656	-0.0280647
	2	8.5168	-0.00901031		2	8.5168	-0.0128098
	2	8.52704	0.00493622		2	8.52704	0.0051918
	2	8.53728	0.0141144		2	8.53728	-0.00835037
	2	8.54752	-0.0174637		2	8.54752	0.000637054
	2	8.55776	-0.0218887		2	8.55776	0.0346184
	2	8.568	-0.0101433		2	8.568	0.00679016
	2	8.57824	-0.00580597		2	8.57824	-0.0207558
	2	8.58848	0.00585556		2	8.58848	-0.00614548
	2	8.59872	0.00756073		2	8.59872	0.0173607
	2	8.60896	-0.0180588		2	8.60896	0.0206413
	2	8.6192	-0.0513687		2	8.6192	0.000904083
	2	8.62944	-0.0774155		2	8.62944	-0.012619
	2	8.63968	-0.0608521		2	8.63968	-0.042141
	2	8.64992	-0.0462761		2	8.64992	-0.035347
	2	8.66016	-0.0215416		2	8.66016	-0.014225
	2	8.6704	0.00504684		2	8.6704	-0.00898743
	2	8.68064	0.00439072		2	8.68064	-0.0307655
	2	8.69088	0.00265884		2	8.69088	-0.0491905
	2	8.70112	0.0467186		2	8.70112	-0.0639191
	2	8.71136	0.0446892		2	8.71136	-0.0243301
	2	8.7216	0.023735		2	8.7216	-0.0226631
	2	8.73184	0.0138321		2	8.73184	-0.0196953
	2	8.74208	0.0167389		2	8.74208	-0.0225525
	2	8.75232	0.00724792		2	8.75232	-0.0188026
	2	8.76256	-0.00615692		2	8.76256	-0.0334625
	2	8.7728	-0.0056839		2	8.7728	-0.0352173
	2	8.78304	-0.00960159		2	8.78304	-0.0620384
	2	8.79328	-0.0158157		2	8.79328	-0.0496635
	2	8.80352	0.021431		2	8.80352	-0.054081
	2	8.81376	-0.000392914		2	8.81376	-0.0793648
	2	8.824	0.00428009		2	8.824	-0.082058
	2	8.83424	-0.00836945		2	8.83424	-0.0926819
	2	8.84448	-0.0307236		2	8.84448	-0.0742989
	2	8.85472	-0.0096283		2	8.85472	-0.0713692
	2	8.86496	0.0267105		2	8.86496	-0.0735435
	2	8.8752	0.0407524		2	8.8752	-0.0859108
	2	8.88544	0.00895309		2	8.88544	-0.0731392
	2	8.89568	0.0104599		2	8.89568	-0.0809326
	2	8.90592	-0.0118027		2	8.90592	-0.0751915
	2	8.91616	-0.0353241		2	8.91616	-0.0730286
	2	8.9264	-0.022995		2	8.9264	-0.0902939
	2	8.93664	-0.00764084		2	8.93664	-0.0972786
	2	8.94688	0.00952911		2	8.94688	-0.0856895
	2	8.95712	0.0238495		2	8.95712	-0.0944824
	2	8.96736	0.0233154		2	8.96736	-0.0890846
	2	8.9776	-0.00075531		2	8.9776	-0.0576019
	2	8.98784	0.00224686		2	8.98784	-0.0443497
	2	8.99808	0.0332336		2	8.99808	-0.0468178
	2	9.00832	0.0514908		2	9.00832	-0.0469475
	2	9.01856	0.0560722		2	9.01856	-0.0690994
	2	9.0288	0.0623245		2	9.0288	-0.0455551
	2	9.03904	0.0716057		2	9.03904	-0.0743332
	2	9.04928	0.0508385		2	9.04928	-0.0952568
	2	9.05952	0.0264359		2	9.05952	-0.113041
	2	9.06976	0.00688553		2	9.06976	-0.0968781
	2	9.08	0.0360985		2	9.08	-0.08498
	2	9.09024	0.0367508		2	9.09024	-0.0884323
	2	9.10048	0.0235443		2	9.10048	-0.110722
	2	9.11072	-0.000617981		2	9.11072	-0.122719
	2	9.12096	0.0394058		2	9.12096	-0.108944
	2	9.1312	0.0326309		2	9.1312	-0.0891609
	2	9.14144	0.0315475		2	9.14144	-0.0351067
	2	9.15168	0.0352097		2	9.15168	-0.0253067
	2	9.16192	0.0517044		2	9.16192	-0.040226
	2	9.17216	0.0774651		2	9.17216	-0.0448647
	2	9.1824	0.0795364		2	9.1824	-0.0681343
	2	9.19264	0.0606766		2	9.19264	-0.0801659
	2	9.20288	0.0496788		2	9.20288	-0.0834084
	2	9.21312	0.0497246		2	9.21312	-0.0947609
	2	9.22336	0.0771561		2	9.22336	-0.0933609
	2	9.2336	0.063282		2	9.2336	-0.111469
	2	9.24384	0.0128708		2	9.24384	-0.0970573
	2	9.25408	-0.0203476		2	9.25408	-0.113941
	2	9.26432	-0.0231819		2	9.26432	-0.139072
	2	9.27456	-0.0635452		2	9.27456	-0.144051
	2	9.2848	-0.0941505		2	9.2848	-0.136581
	2	9.29504	-0.0794487		2	9.29504	-0.14716
	2	9.30528	-0.0618439		2	9.30528	-0.152355
	2	9.31552	-0.0236702		2	9.31552	-0.108971
	2	9.32576	-0.0381699		2	9.32576	-0.077137
	2	9.336	-0.0684242		2	9.336	-0.0907021
	2	9.34624	-0.067421		2	9.34624	-0.07901
	2	9.35648	-0.0416107		2	9.35648	-0.065937
	2	9.36672	-0.0646591		2	9.36672	-0.053463
	2	9.37696	-0.0688057		2	9.37696	-0.063282
	2	9.3872	-0.0919075		2	9.3872	-0.0904884
	2	9.39744	-0.09478		2	9.39744	-0.0818176
	2	9.40768	-0.10466		2	9.40768	-0.0987282
	2	9.41792	-0.105782		2	9.41792	-0.101875
	2	9.42816	-0.11676		2	9.42816	-0.0928688
	2	9.4384	-0.0908394		2	9.4384	-0.105267
	2	9.44864	-0.092247		2	9.44864	-0.112438
	2	9.45888	-0.103935		2	9.45888	-0.124519
	2	9.46912	-0.134743		2	9.46912	-0.144295
	2	9.47936	-0.138905		2	9.47936	-0.133564
	2	9.4896	-0.117462		2	9.4896	-0.125446
	2	9.49984	-0.0893631		2	9.49984	-0.114475
	2	9.51008	-0.0749016		2	9.51008	-0.134651
	2	9.52032	-0.0440865		2	9.52032	-0.134365
	2	9.53056	-0.00754929		2	9.53056	-0.126514
	2	9.5408	0.0237961		2	9.5408	-0.149239
	2	9.55104	0.0178795		2	9.55104	-0.166889
	2	9.56128	0.0345421		2	9.56128	-0.193825
	2	9.57152	0.0195351		2	9.57152	-0.214279
	2	9.58176	0.0127792		2	9.58176	-0.199265
	2	9.592	0.016243		2	9.592	-0.175034
	2	9.60224	0.0487747		2	9.60224	-0.192852
	2	9.61248	0.0598412		2	9.61248	-0.197212
	2	9.62272	0.0580177		2	9.62272	-0.172058
	2	9.63296	0.0770836		2	9.63296	-0.166969
	2	9.6432	0.0898247		2	9.6432	-0.130733
	2	9.65344	0.0606346		2	9.65344	-0.148563
	2	9.66368	0.0789566		2	9.66368	-0.127907
	2	9.67392	0.13456		2	9.67392	-0.105991
	2	9.68416	0.15139		2	9.68416	-0.0925446
	2	9.6944	0.159809		2	9.6944	-0.103081
	2	9.70464	0.153713		2	9.70464	-0.0718155
	2	9.71488	0.162388		2	9.71488	-0.0397339
	2	9.72512	0.178074		2	9.72512	-0.0245552
	2	9.73536	0.22353		2	9.73536	-0.0287628
	2	9.7456	0.245728		2	9.7456	-0.00695038
	2	9.75584	0.255478		2	9.75584	0.00628281
	2	9.76608	0.227654		2	9.76608	0.00819397
	2	9.77632	0.234554		2	9.77632	0.001297
	2	9.78656	0.27359		2	9.78656	0.00724411
	2	9.7968	0.293415		2	9.7968	0.00365067
	2	9.80704	0.286148		2	9.80704	0.0295372
	2	9.81728	0.267246		2	9.81728	0.0447617
	2	9.82752	0.279778		2	9.82752	0.0602684
	2	9.83776	0.270214		2	9.83776	0.0763168
	2	9.848	0.265224		2	9.848	0.081646
	2	9.85824	0.253826		2	9.85824	0.103649
	2	9.86848	0.260273		2	9.86848	0.119816
	2	9.87872	0.288521		2	9.87872	0.107361
	2	9.88896	0.276787		2	9.88896	0.0772362
	2	9.8992	0.290447		2	9.8992	0.0901146
	2	9.90944	0.306099		2	9.90944	0.0653496
	2	9.91968	0.323425		2	9.91968	0.0166893
	2	9.92992	0.315067		2	9.92992	0.00466919
	2	9.94016	0.29911		2	9.94016	-0.0109138
	2	9.9504	0.275494		2	9.9504	-0.0235939
	2	9.96064	0.265903		2	9.96064	-0.0322342
	2	9.97088	0.253178		2	9.97088	-0.051693
	2	9.98112	0.262917		2	9.98112	-0.0779762
	2	9.99136	0.274544		2	9.99136	-0.138756
	2	10.0016	0.253757		2	10.0016	-0.150242
	2	10.0118	0.244301		2	10.0118	-0.169758
	2	10.0221	0.24424		2	10.0221	-0.194221
	2	10.0323	0.230621		2	10.0323	-0.204475
	2	10.0426	0.157169		2	10.0426	-0.222355
	2	10.0528	0.16576		2	10.0528	-0.266544
	2	10.063	0.138252		2	10.063	-0.305977
	2	10.0733	0.133045		2	10.0733	-0.301483
	2	10.0835	0.131168		2	10.0835	-0.319599
	2	10.0938	0.139458		2	10.0938	-0.354305
	2	10.104	0.131683		2	10.104	-0.390892
	2	10.1142	0.144814		2	10.1142	-0.362217
	2	10.1245	0.108505		2	10.1245	-0.350704
	2	10.1347	0.0850754		2	10.1347	-0.308964
	2	10.145	0.0828323		2	10.145	-0.32085
	2	10.1552	0.0496597		2	10.1552	-0.349789
	2	10.1654	0.0432968		2	10.1654	-0.365891
	2	10.1757	0.0806122		2	10.1757	-0.349686
	2	10.1859	0.113808		2	10.1859	-0.337727
	2	10.1962	0.128513		2	10.1962	-0.362259
	2	10.2064	0.0987358		2	10.2064	-0.367271
	2	10.2166	0.067955		2	10.2166	-0.393719
	2	10.2269	0.0850296		2	10.2269	-0.40099
	2	10.2371	0.091671		2	10.2371	-0.40007
	2	10.2474	0.0935097		2	10.2474	-0.370029
	2	10.2576	0.0910187		2	10.2576	-0.362106
	2	10.2678	0.0776749		2	10.2678	-0.356598
	2	10.2781	0.080574		2	10.2781	-0.358814
	2	10.2883	0.0436745		2	10.2883	-0.382778
	2	10.2986	0.0111618		2	10.2986	-0.380421
	2	10.3088	0.0305061		2	10.3088	-0.390553
	2	10.319	0.0320396		2	10.319	-0.380947
	2	10.3293	0.0552902		2	10.3293	-0.375591
	2	10.3395	0.053093		2	10.3395	-0.380878
	2	10.3498	0.0400085		2	10.3498	-0.38549
	2	10.36	0.0553627		2	10.36	-0.384754
	2	10.3702	0.0647888		2	10.3702	-0.366566
	2	10.3805	0.0657005		2	10.3805	-0.387119
	2	10.3907	0.0696297		2	10.3907	-0.42791
	2	10.401	0.0290527		2	10.401	-0.446144
	2	10.4112	-0.0021286		2	10.4112	-0.444744
	2	10.4214	-0.019207		2	10.4214	-0.410965
	2	10.4317	0.00276947		2	10.4317	-0.406876
	2	10.4419	0.0138321		2	10.4419	-0.405437
	2	10.4522	0.0110474		2	10.4522	-0.401051
	2	10.4624	-0.0094986		2	10.4624	-0.378414
	2	10.4726	-0.00673676		2	10.4726	-0.366051
	2	10.4829	0.0132103		2	10.4829	-0.369602
	2	10.4931	0.0211067		2	10.4931	-0.365295
	2	10.5034	-0.00698853		2	10.5034	-0.387875
	2	10.5136	-0.0431976		2	10.5136	-0.384254
	2	10.5238	-0.0288467		2	10.5238	-0.374546
	2	10.5341	0.0232468		2	10.5341	-0.334183
	2	10.5443	0.0324783		2	10.5443	-0.313541
	2	10.5546	0.0527763		2	10.5546	-0.327591
	2	10.5648	0.0360336		2	10.5648	-0.344105
	2	10.575	0.0216599		2	10.575	-0.319782
	2	10.5853	0.0219765		2	10.5853	-0.338833
	2	10.5955	0.0198097		2	10.5955	-0.323025
	2	10.6058	0.00922012		2	10.6058	-0.298222
	2	10.616	0.00437164		2	10.616	-0.295765
	2	10.6262	0.035038		2	10.6262	-0.308235
	2	10.6365	0.0697136		2	10.6365	-0.331791
	2	10.6467	0.0758286		2	10.6467	-0.301659
	2	10.657	0.044857		2	10.657	-0.289494
	2	10.6672	0.0462074		2	10.6672	-0.293301
	2	10.6774	0.0607681		2	10.6774	-0.295029
	2	10.6877	0.0483322		2	10.6877	-0.288795
	2	10.6979	0.0426102		2	10.6979	-0.283302
	2	10.7082	0.0387077		2	10.7082	-0.256992
	2	10.7184	0.0396996		2	10.7184	-0.216732
	2	10.7286	0.0558205		2	10.7286	-0.213535
	2	10.7389	0.054657		2	10.7389	-0.241196
	2	10.7491	0.0862732		2	10.7491	-0.251293
	2	10.7594	0.073204		2	10.7594	-0.244614
	2	10.7696	0.0875702		2	10.7696	-0.221661
	2	10.7798	0.127541		2	10.7798	-0.241653
	2	10.7901	0.143242		2	10.7901	-0.257927
	2	10.8003	0.133125		2	10.8003	-0.265644
	2	10.8106	0.118374		2	10.8106	-0.25346
	2	10.8208	0.124496		2	10.8208	-0.235142
	2	10.831	0.160423		2	10.831	-0.236328
	2	10.8413	0.131279		2	10.8413	-0.210701
	2	10.8515	0.135574		2	10.8515	-0.209015
	2	10.8618	0.164196		2	10.8618	-0.183769
	2	10.872	0.15802		2	10.872	-0.215256
	2	10.8822	0.126179		2	10.8822	-0.201897
	2	10.8925	0.0793648		2	10.8925	-0.16898
	2	10.9027	0.074337		2	10.9027	-0.105759
	2	10.913	0.0752335		2	10.913	-0.119724
	2	10.9232	0.0874557		2	10.9232	-0.117722
	2	10.9334	0.0951653		2	10.9334	-0.156078
	2	10.9437	0.103848		2	10.9437	-0.176689
	2	10.9539	0.0942879		2	10.9539	-0.175186
	2	10.9642	0.0769691		2	10.9642	-0.167439
	2	10.9744	0.0957184		2	10.9744	-0.187077
	2	10.9846	0.0875626		2	10.9846	-0.189613
	2	10.9949	0.0447388		2	10.9949	-0.180069
	2	11.0051	0.0407028		2	11.0051	-0.17662
	2	11.0154	0.0842361		2	11.0154	-0.181114
	2	11.0256	0.0838776		2	11.0256	-0.192951
	2	11.0358	0.0388603		2	11.0358	-0.158314
	2	11.0461	0.036171		2	11.0461	-0.137901
	2	11.0563	0.0574303		2	11.0563	-0.166058
	2	11.0666	0.0804787		2	11.0666	-0.180332
	2	11.0768	0.0739555		2	11.0768	-0.186283
	2	11.087	0.0876579		2	11.087	-0.185757
	2	11.0973	0.130989		2	11.0973	-0.15844
	2	11.1075	0.12669		2	11.1075	-0.146423
	2	11.1178	0.0832367		2	11.1178	-0.137421
	2	11.128	0.0770416		2	11.128	-0.163223
	2	11.1382	0.0880508		2	11.1382	-0.175556
	2	11.1485	0.0678368		2	11.1485	-0.151447
	2	11.1587	0.0710907		2	11.1587	-0.162872
	2	11.169	0.065567		2	11.169	-0.15604
	2	11.1792	0.114258		2	11.1792	-0.155014
	2	11.1894	0.145866		2	11.1894	-0.166637
	2	11.1997	0.146343		2	11.1997	-0.188908
	2	11.2099	0.125252		2	11.2099	-0.173771
	2	11.2202	0.104401		2	11.2202	-0.169384
	2	11.2304	0.109642		2	11.2304	-0.141117
	2	11.2406	0.0872078		2	11.2406	-0.155411
	2	11.2509	0.120415		2	11.2509	-0.150978
	2	11.2611	0.121407		2	11.2611	-0.150928
	2	11.2714	0.114872		2	11.2714	-0.148888
	2	11.2816	0.0998611		2	11.2816	-0.148296
	2	11.2918	0.0898933		2	11.2918	-0.152519
	2	11.3021	0.0940208		2	11.3021	-0.169762
	2	11.3123	0.11478		2	11.3123	-0.162109
	2	11.3226	0.100445		2	11.3226	-0.110641
	2	11.3328	0.105133		2	11.3328	-0.100613
	2	11.343	0.105083		2	11.343	-0.08992
	2	11.3533	0.102921		2	11.3533	-0.104286
	2	11.3635	0.110943		2	11.3635	-0.111332
	2	11.3738	0.104912		2	11.3738	-0.087925
	2	11.384	0.114967		2	11.384	-0.0844917
	2	11.3942	0.114742		2	11.3942	-0.0956917
	2	11.4045	0.103527		2	11.4045	-0.106205
	2	11.4147	0.0868645		2	11.4147	-0.0873184
	2	11.425	0.0703163		2	11.425	-0.0762978
	2	11.4352	0.0878372		2	11.4352	-0.0346107
	2	11.4454	0.133823		2	11.4454	-0.0399055
	2	11.4557	0.124622		2	11.4557	-0.0629311
	2	11.4659	0.128395		2	11.4659	-0.0757446
	2	11.4762	0.135471		2	11.4762	-0.0828743
	2	11.4864	0.153831		2	11.4864	-0.0864677
	2	11.4966	0.163792		2	11.4966	-0.0509109
	2	11.5069	0.143826		2	11.5069	-0.0251122
	2	11.5171	0.126125		2	11.5171	-0.00723648
	2	11.5274	0.116306		2	11.5274	-0.0213013
	2	11.5376	0.12418		2	11.5376	-0.0492439
	2	11.5478	0.113243		2	11.5478	-0.0311317
	2	11.5581	0.101234		2	11.5581	-0.0129585
	2	11.5683	0.0894547		2	11.5683	-0.0155106
	2	11.5786	0.0823898		2	11.5786	-0.0213356
	2	11.5888	0.0747261		2	11.5888	-0.025589
	2	11.599	0.0871048		2	11.599	-0.0246162
	2	11.6093	0.0937805		2	11.6093	0.00834274
	2	11.6195	0.0728378		2	11.6195	0.0205879
	2	11.6298	0.0496712		2	11.6298	0.0165062
	2	11.64	0.0462036		2	11.64	0.039444
	2	11.6502	0.0507393		2	11.6502	0.00069809
	2	11.6605	0.0602379		2	11.6605	-0.0131264
	2	11.6707	0.0547791		2	11.6707	-0.00379181
	2	11.681	0.0429764		2	11.681	-0.00630569
	2	11.6912	0.0443344		2	11.6912	0.0156555
	2	11.7014	0.0429115		2	11.7014	0.02911
	2	11.7117	-0.00867081		2	11.7117	0.0535316
	2	11.7219	-0.00223541		2	11.7219	0.0397034
	2	11.7322	-0.000259399		2	11.7322	0.016655
	2	11.7424	0.00603485		2	11.7424	0.0321465
	2	11.7526	-0.0103302		2	11.7526	0.0253105
	2	11.7629	-0.00217438		2	11.7629	0.0455894
	2	11.7731	0.0282516		2	11.7731	0.0366554
	2	11.7834	0.0340996		2	11.7834	0.0729904
	2	11.7936	0.0249443		2	11.7936	0.0777855
	2	11.8038	0.0177231		2	11.8038	0.0440483
	2	11.8141	-0.00126648		2	11.8141	0.0265007
	2	11.8243	0.00967789		2	11.8243	0.0391998
	2	11.8346	0.0205574		2	11.8346	0.0271454
	2	11.8448	0.052433		2	11.8448	0.0497055
	2	11.855	0.0533066		2	11.855	0.0522003
	2	11.8653	0.0307999		2	11.8653	0.0807915
	2	11.8755	0.045681		2	11.8755	0.0798035
	2	11.8858	0.0419312		2	11.8858	0.0875282
	2	11.896	0.0289612		2	11.896	0.0762596
	2	11.9062	0.0135727		2	11.9062	0.0555687
	2	11.9165	0.00357056		2	11.9165	0.0605278
	2	11.9267	0.0264053		2	11.9267	0.074295
	2	11.937	0.0567894		2	11.937	0.094902
	2	11.9472	0.0472984		2	11.9472	0.0983505
	2	11.9574	0.0278625		2	11.9574	0.0915489
	2	11.9677	0.0415802		2	11.9677	0.0961571
	2	11.9779	0.0511017		2	11.9779	0.0964088
	2	11.9882	-0.00194168		2	11.9882	0.0685539
	2	11.9984	-0.00559235		2	11.9984	0.0764084
	4	3.00768	-0.000923157		4	3.00768	0.139908
	4	3.01792	0.00429535		4	3.01792	0.139343
	4	3.02816	0.0364304		4	3.02816	0.127766
	4	3.0384	0.0428696		4	3.0384	0.133026
	4	3.04864	0.0459251		4	3.04864	0.135452
	4	3.05888	0.045002		4	3.05888	0.13615
	4	3.06912	0.0666275		4	3.06912	0.13512
	4	3.07936	0.0909309		4	3.07936	0.139713
	4	3.0896	0.084259		4	3.0896	0.149906
	4	3.09984	0.0848312		4	3.09984	0.128277
	4	3.11008	0.115273		4	3.11008	0.10144
	4	3.12032	0.112267		4	3.12032	0.10648
	4	3.13056	0.127468		4	3.13056	0.101566
	4	3.1408	0.131989		4	3.1408	0.0767021
	4	3.15104	0.106049		4	3.15104	0.0981483
	4	3.16128	0.091404		4	3.16128	0.0883713
	4	3.17152	0.101616		4	3.17152	0.0725288
	4	3.18176	0.0807571		4	3.18176	0.0645218
	4	3.192	0.0547409		4	3.192	0.0635796
	4	3.20224	0.0378075		4	3.20224	0.063633
	4	3.21248	0.0250015		4	3.21248	0.0559044
	4	3.22272	0.0311127		4	3.22272	0.0506592
	4	3.23296	0.0215302		4	3.23296	0.0382919
	4	3.2432	0.00134659		4	3.2432	0.0471954
	4	3.25344	-0.0237045		4	3.25344	0.0171509
	4	3.26368	-0.0307159		4	3.26368	-0.000759125
	4	3.27392	-0.0445328		4	3.27392	0.00254059
	4	3.28416	-0.041153		4	3.28416	0.00741959
	4	3.2944	-0.0715599		4	3.2944	0.0262642
	4	3.30464	-0.0973129		4	3.30464	0.0428352
	4	3.31488	-0.0985336		4	3.31488	0.0125122
	4	3.32512	-0.0735664		4	3.32512	0.0140724
	4	3.33536	-0.0720482		4	3.33536	0.0313416
	4	3.3456	-0.0968704		4	3.3456	0.00934219
	4	3.35584	-0.129311		4	3.35584	-0.0398102
	4	3.36608	-0.1479		4	3.36608	-0.0533752
	4	3.37632	-0.1605		4	3.37632	-0.0307922
	4	3.38656	-0.194633		4	3.38656	-0.0292931
	4	3.3968	-0.192265		4	3.3968	-0.0128326
	4	3.40704	-0.184578		4	3.40704	-0.0280571
	4	3.41728	-0.179642		4	3.41728	-0.0431252
	4	3.42752	-0.211517		4	3.42752	-0.0688744
	4	3.43776	-0.208324		4	3.43776	-0.0727692
	4	3.448	-0.191006		4	3.448	-0.0391731
	4	3.45824	-0.232658		4	3.45824	-0.044754
	4	3.46848	-0.264103		4	3.46848	-0.0472527
	4	3.47872	-0.287903		4	3.47872	-0.0216522
	4	3.48896	-0.285229		4	3.48896	-0.0380859
	4	3.4992	-0.318687		4	3.4992	-0.060276
	4	3.50944	-0.353825		4	3.50944	-0.0714264
	4	3.51968	-0.348026		4	3.51968	-0.0868607
	4	3.52992	-0.313622		4	3.52992	-0.0781174
	4	3.54016	-0.255596		4	3.54016	-0.0714951
	4	3.5504	-0.233997		4	3.5504	-0.085247
	4	3.56064	-0.230453		4	3.56064	-0.0560837
	4	3.57088	-0.289322		4	3.57088	-0.0571098
	4	3.58112	-0.326618		4	3.58112	-0.0584564
	4	3.59136	-0.347862		4	3.59136	-0.0879822
	4	3.6016	-0.353947		4	3.6016	-0.11536
	4	3.61184	-0.341946		4	3.61184	-0.0915527
	4	3.62208	-0.319164		4	3.62208	-0.0905304
	4	3.63232	-0.317448		4	3.63232	-0.0988083
	4	3.64256	-0.334023		4	3.64256	-0.0916367
	4	3.6528	-0.324215		4	3.6528	-0.0919266
	4	3.66304	-0.2826		4	3.66304	-0.0498619
	4	3.67328	-0.264549		4	3.67328	-0.0244904
	4	3.68352	-0.288765		4	3.68352	-0.0252228
	4	3.69376	-0.30275		4	3.69376	-0.0575867
	4	3.704	-0.317272		4	3.704	-0.0575066
	4	3.71424	-0.31773		4	3.71424	-0.0651703
	4	3.72448	-0.307472		4	3.72448	-0.119751
	4	3.73472	-0.282715		4	3.73472	-0.134056
	4	3.74496	-0.256691		4	3.74496	-0.117416
	4	3.7552	-0.252293		4	3.7552	-0.098381
	4	3.76544	-0.266743		4	3.76544	-0.108734
	4	3.77568	-0.270882		4	3.77568	-0.0933876
	4	3.78592	-0.260727		4	3.78592	-0.116753
	4	3.79616	-0.260971		4	3.79616	-0.118061
	4	3.8064	-0.261436		4	3.8064	-0.124767
	4	3.81664	-0.274212		4	3.81664	-0.128971
	4	3.82688	-0.265396		4	3.82688	-0.108715
	4	3.83712	-0.287327		4	3.83712	-0.0867157
	4	3.84736	-0.295151		4	3.84736	-0.096344
	4	3.8576	-0.289986		4	3.8576	-0.0696144
	4	3.86784	-0.248875		4	3.86784	-0.0529518
	4	3.87808	-0.215096		4	3.87808	-0.048912
	4	3.88832	-0.200733		4	3.88832	-0.0644875
	4	3.89856	-0.227634		4	3.89856	-0.054657
	4	3.9088	-0.265976		4	3.9088	-0.0519905
	4	3.91904	-0.294708		4	3.91904	-0.0356331
	4	3.92928	-0.296993		4	3.92928	-0.0276718
	4	3.93952	-0.258308		4	3.93952	-0.0267448
	4	3.94976	-0.252495		4	3.94976	-0.0263214
	4	3.96	-0.267067		4	3.96	-0.0419731
	4	3.97024	-0.239265		4	3.97024	-0.0202789
	4	3.98048	-0.21904		4	3.98048	-0.0315704
	4	3.99072	-0.202305		4	3.99072	-0.0656929
	4	4.00096	-0.180557		4	4.00096	-0.0472755
	4	4.0112	-0.166168		4	4.0112	-0.0247421
	4	4.02144	-0.14547		4	4.02144	-0.010994
	4	4.03168	-0.116699		4	4.03168	-0.0164795
	4	4.04192	-0.125099		4	4.04192	-0.0548477
	4	4.05216	-0.113411		4	4.05216	-0.0710449
	4	4.0624	-0.116581		4	4.0624	-0.05019
	4	4.07264	-0.145889		4	4.07264	-0.0635529
	4	4.08288	-0.189053		4	4.08288	-0.0698547
	4	4.09312	-0.195778		4	4.09312	-0.0787277
	4	4.10336	-0.178551		4	4.10336	-0.0704575
	4	4.1136	-0.169407		4	4.1136	-0.0590744
	4	4.12384	-0.145691		4	4.12384	-0.0580139
	4	4.13408	-0.12463		4	4.13408	-0.0384979
	4	4.14432	-0.138939		4	4.14432	-0.0522614
	4	4.15456	-0.141014		4	4.15456	-0.0476952
	4	4.1648	-0.135086		4	4.1648	-0.0523643
	4	4.17504	-0.153976		4	4.17504	-0.0581017
	4	4.18528	-0.156418		4	4.18528	-0.0621643
	4	4.19552	-0.153862		4	4.19552	-0.04842
	4	4.20576	-0.153687		4	4.20576	-0.0383453
	4	4.216	-0.144585		4	4.216	-0.020504
	4	4.22624	-0.118057		4	4.22624	-0.0109863
	4	4.23648	-0.117867		4	4.23648	-0.0242538
	4	4.24672	-0.127205		4	4.24672	0.00531387
	4	4.25696	-0.133965		4	4.25696	0.0156517
	4	4.2672	-0.135555		4	4.2672	0.0372276
	4	4.27744	-0.120583		4	4.27744	0.052372
	4	4.28768	-0.11076		4	4.28768	0.067215
	4	4.29792	-0.144344		4	4.29792	0.128086
	4	4.30816	-0.151787		4	4.30816	0.155258
	4	4.3184	-0.111893		4	4.3184	0.134033
	4	4.32864	-0.115337		4	4.32864	0.14888
	4	4.33888	-0.104088		4	4.33888	0.191105
	4	4.34912	-0.0878372		4	4.34912	0.224922
	4	4.35936	-0.081028		4	4.35936	0.241959
	4	4.3696	-0.115772		4	4.3696	0.266953
	4	4.37984	-0.164253		4	4.37984	0.279636
	4	4.39008	-0.170921		4	4.39008	0.263382
	4	4.40032	-0.142052		4	4.40032	0.252735
	4	4.41056	-0.0831375		4	4.41056	0.237381
	4	4.4208	-0.11681		4	4.4208	0.243401
	4	4.43104	-0.128242		4	4.43104	0.221527
	4	4.44128	-0.129784		4	4.44128	0.214146
	4	4.45152	-0.129936		4	4.45152	0.205166
	4	4.46176	-0.160103		4	4.46176	0.219162
	4	4.472	-0.175171		4	4.472	0.189606
	4	4.48224	-0.179436		4	4.48224	0.170822
	4	4.49248	-0.181675		4	4.49248	0.199043
	4	4.50272	-0.193611		4	4.50272	0.215828
	4	4.51296	-0.170513		4	4.51296	0.218292
	4	4.5232	-0.151398		4	4.5232	0.202625
	4	4.53344	-0.153542		4	4.53344	0.170059
	4	4.54368	-0.159199		4	4.54368	0.160023
	4	4.55392	-0.116844		4	4.55392	0.146908
	4	4.56416	-0.127674		4	4.56416	0.102768
	4	4.5744	-0.12455		4	4.5744	0.0796051
	4	4.58464	-0.126194		4	4.58464	0.0744934
	4	4.59488	-0.13879		4	4.59488	0.0689392
	4	4.60512	-0.114388		4	4.60512	0.0399933
	4	4.61536	-0.11739		4	4.61536	0.0602264
	4	4.6256	-0.125179		4	4.6256	0.0357742
	4	4.63584	-0.130692		4	4.63584	0.00489426
	4	4.64608	-0.152382		4	4.64608	-0.0384026
	4	4.65632	-0.173546		4	4.65632	-0.0524178
	4	4.66656	-0.179775		4	4.66656	-0.0359993
	4	4.6768	-0.174721		4	4.6768	-0.0445633
	4	4.68704	-0.190044		4	4.68704	-0.0557137
	4	4.69728	-0.190865		4	4.69728	-0.0640869
	4	4.70752	-0.172379		4	4.70752	-0.108444
	4	4.71776	-0.15435		4	4.71776	-0.120853
	4	4.728	-0.139042		4	4.728	-0.130646
	4	4.73824	-0.153576		4	4.73824	-0.0998688
	4	4.74848	-0.166862		4	4.74848	-0.0898438
	4	4.75872	-0.184345		4	4.75872	-0.109268
	4	4.76896	-0.203392		4	4.76896	-0.100376
	4	4.7792	-0.195229		4	4.7792	-0.112656
	4	4.78944	-0.182991		4	4.78944	-0.136551
	4	4.79968	-0.202362		4	4.79968	-0.148346
	4	4.80992	-0.204926		4	4.80992	-0.14978
	4	4.82016	-0.174965		4	4.82016	-0.150818
	4	4.8304	-0.176399		4	4.8304	-0.167332
	4	4.84064	-0.165131		4	4.84064	-0.158306
	4	4.85088	-0.168003		4	4.85088	-0.131718
	4	4.86112	-0.17894		4	4.86112	-0.155987
	4	4.87136	-0.181099		4	4.87136	-0.15535
	4	4.8816	-0.168785		4	4.8816	-0.165417
	4	4.89184	-0.173515		4	4.89184	-0.15065
	4	4.90208	-0.170113		4	4.90208	-0.100506
	4	4.91232	-0.170952		4	4.91232	-0.0801392
	4	4.92256	-0.150146		4	4.92256	-0.0958023
	4	4.9328	-0.166595		4	4.9328	-0.111012
	4	4.94304	-0.178047		4	4.94304	-0.107662
	4	4.95328	-0.169289		4	4.95328	-0.0796242
	4	4.96352	-0.171452		4	4.96352	-0.0642395
	4	4.97376	-0.15781		4	4.97376	-0.0721779
	4	4.984	-0.167366		4	4.984	-0.0801201
	4	4.99424	-0.159355		4	4.99424	-0.0746803
	4	5.00448	-0.146721		4	5.00448	-0.0671196
	4	5.01472	-0.145538		4	5.01472	-0.0582619
	4	5.02496	-0.144096		4	5.02496	-0.0843201
	4	5.0352	-0.118076		4	5.0352	-0.037632
	4	5.04544	-0.130714		4	5.04544	-0.0259705
	4	5.05568	-0.124634		4	5.05568	-0.0605011
	4	5.06592	-0.132824		4	5.06592	-0.0749054
	4	5.07616	-0.14748		4	5.07616	-0.0432358
	4	5.0864	-0.139633		4	5.0864	-0.0498123
	4	5.09664	-0.134605		4	5.09664	-0.025692
	4	5.10688	-0.122421		4	5.10688	0.0212593
	4	5.11712	-0.107677		4	5.11712	0.042099
	4	5.12736	-0.0899773		4	5.12736	0.0224686
	4	5.1376	-0.0893364		4	5.1376	-0.000614166
	4	5.14784	-0.0984535		4	5.14784	-0.00557327
	4	5.15808	-0.103222		4	5.15808	-0.0119743
	4	5.16832	-0.132523		4	5.16832	-0.00616837
	4	5.17856	-0.13224		4	5.17856	0.00444031
	4	5.1888	-0.125587		4	5.1888	-0.018692
	4	5.19904	-0.107384		4	5.19904	-0.0492096
	4	5.20928	-0.146107		4	5.20928	-0.0412216
	4	5.21952	-0.179737		4	5.21952	-0.033783
	4	5.22976	-0.182743		4	5.22976	-0.0108948
	4	5.24	-0.165592		4	5.24	0.00209045
	4	5.25024	-0.15836		4	5.25024	0.0338898
	4	5.26048	-0.193325		4	5.26048	0.0204315
	4	5.27072	-0.182423		4	5.27072	0.00688171
	4	5.28096	-0.167442		4	5.28096	0.0141296
	4	5.2912	-0.1679		4	5.2912	-0.0157166
	4	5.30144	-0.145058		4	5.30144	-0.0271149
	4	5.31168	-0.123661		4	5.31168	-0.0331917
	4	5.32192	-0.159969		4	5.32192	-0.0183411
	4	5.33216	-0.177021		4	5.33216	-0.0209541
	4	5.3424	-0.149086		4	5.3424	-0.0589981
	4	5.35264	-0.147495		4	5.35264	-0.0650368
	4	5.36288	-0.13868		4	5.36288	-0.0522614
	4	5.37312	-0.155354		4	5.37312	-0.0176926
	4	5.38336	-0.172375		4	5.38336	-0.0170441
	4	5.3936	-0.193253		4	5.3936	-0.0475922
	4	5.40384	-0.205101		4	5.40384	-0.0388184
	4	5.41408	-0.203026		4	5.41408	-0.0454559
	4	5.42432	-0.209679		4	5.42432	-0.0383949
	4	5.43456	-0.215687		4	5.43456	-0.0318222
	4	5.4448	-0.193443		4	5.4448	-0.0468025
	4	5.45504	-0.19352		4	5.45504	-0.0754433
[truncated: 34,041 more rows]

## Sheet: panel E
		Top panel				Bottom panel
		Sound level (dB)	Post-stimulus time (ms)	Vm rel (mV)		Sound level (dB)	Post-stimulus time (ms)	Vm rel (mV)
		-10	3.00768	-0.0118179		-10	3.00768	-0.226799
		-10	3.01792	-0.0455856		-10	3.01792	-0.228691
		-10	3.02816	-0.0513916		-10	3.02816	-0.220844
		-10	3.0384	-0.040081		-10	3.0384	-0.203785
		-10	3.04864	0.00243759		-10	3.04864	-0.198261
		-10	3.05888	0.0325584		-10	3.05888	-0.218224
		-10	3.06912	0.0621719		-10	3.06912	-0.237804
		-10	3.07936	0.0585518		-10	3.07936	-0.226158
		-10	3.0896	0.0339622		-10	3.0896	-0.230946
		-10	3.09984	0.0129204		-10	3.09984	-0.23114
		-10	3.11008	0.0253906		-10	3.11008	-0.234276
		-10	3.12032	0.0150223		-10	3.12032	-0.24313
		-10	3.13056	0.00595856		-10	3.13056	-0.240582
		-10	3.1408	-0.0337486		-10	3.1408	-0.265545
		-10	3.15104	-0.0464554		-10	3.15104	-0.257713
		-10	3.16128	-0.0390778		-10	3.16128	-0.267796
		-10	3.17152	-0.0193787		-10	3.17152	-0.275101
		-10	3.18176	0.00865173		-10	3.18176	-0.288101
		-10	3.192	0.0206337		-10	3.192	-0.278282
		-10	3.20224	0.0162125		-10	3.20224	-0.270874
		-10	3.21248	0.0315857		-10	3.21248	-0.283215
		-10	3.22272	0.0293465		-10	3.22272	-0.291397
		-10	3.23296	0.0202866		-10	3.23296	-0.280773
		-10	3.2432	0.026741		-10	3.2432	-0.281235
		-10	3.25344	0.0065918		-10	3.25344	-0.291805
		-10	3.26368	-0.00706482		-10	3.26368	-0.294632
		-10	3.27392	-0.0297432		-10	3.27392	-0.288136
		-10	3.28416	-0.0415764		-10	3.28416	-0.287338
		-10	3.2944	-0.0613747		-10	3.2944	-0.29958
		-10	3.30464	-0.0642281		-10	3.30464	-0.305073
		-10	3.31488	-0.0635033		-10	3.31488	-0.306911
		-10	3.32512	-0.0670624		-10	3.32512	-0.309303
		-10	3.33536	-0.0695724		-10	3.33536	-0.304897
		-10	3.3456	-0.0709648		-10	3.3456	-0.313667
		-10	3.35584	-0.0700302		-10	3.35584	-0.314651
		-10	3.36608	-0.0739937		-10	3.36608	-0.308804
		-10	3.37632	-0.0829163		-10	3.37632	-0.303089
		-10	3.38656	-0.080864		-10	3.38656	-0.315994
		-10	3.3968	-0.0700607		-10	3.3968	-0.33997
		-10	3.40704	-0.0732651		-10	3.40704	-0.352219
		-10	3.41728	-0.0863228		-10	3.41728	-0.360283
		-10	3.42752	-0.0897369		-10	3.42752	-0.340176
		-10	3.43776	-0.087616		-10	3.43776	-0.328537
		-10	3.448	-0.0854912		-10	3.448	-0.320129
		-10	3.45824	-0.0926476		-10	3.45824	-0.357433
		-10	3.46848	-0.0991592		-10	3.46848	-0.392006
		-10	3.47872	-0.119438		-10	3.47872	-0.399803
		-10	3.48896	-0.107952		-10	3.48896	-0.399982
		-10	3.4992	-0.117504		-10	3.4992	-0.408363
		-10	3.50944	-0.147675		-10	3.50944	-0.404221
		-10	3.51968	-0.147339		-10	3.51968	-0.405174
		-10	3.52992	-0.128521		-10	3.52992	-0.39954
		-10	3.54016	-0.138165		-10	3.54016	-0.407242
		-10	3.5504	-0.137699		-10	3.5504	-0.430382
		-10	3.56064	-0.130226		-10	3.56064	-0.462246
		-10	3.57088	-0.117428		-10	3.57088	-0.47678
		-10	3.58112	-0.100048		-10	3.58112	-0.461315
		-10	3.59136	-0.108425		-10	3.59136	-0.440567
		-10	3.6016	-0.125603		-10	3.6016	-0.42487
		-10	3.61184	-0.16724		-10	3.61184	-0.40654
		-10	3.62208	-0.192989		-10	3.62208	-0.399014
		-10	3.63232	-0.193623		-10	3.63232	-0.390137
		-10	3.64256	-0.203262		-10	3.64256	-0.409531
		-10	3.6528	-0.229729		-10	3.6528	-0.42136
		-10	3.66304	-0.243614		-10	3.66304	-0.422134
		-10	3.67328	-0.208096		-10	3.67328	-0.434139
		-10	3.68352	-0.189613		-10	3.68352	-0.42614
		-10	3.69376	-0.171383		-10	3.69376	-0.428776
		-10	3.704	-0.176483		-10	3.704	-0.448006
		-10	3.71424	-0.178787		-10	3.71424	-0.463406
		-10	3.72448	-0.195248		-10	3.72448	-0.463699
		-10	3.73472	-0.198635		-10	3.73472	-0.468887
		-10	3.74496	-0.197884		-10	3.74496	-0.455578
		-10	3.7552	-0.210094		-10	3.7552	-0.415279
		-10	3.76544	-0.225399		-10	3.76544	-0.388428
		-10	3.77568	-0.222107		-10	3.77568	-0.384716
		-10	3.78592	-0.219345		-10	3.78592	-0.400944
		-10	3.79616	-0.227631		-10	3.79616	-0.410694
		-10	3.8064	-0.218048		-10	3.8064	-0.405544
		-10	3.81664	-0.214706		-10	3.81664	-0.415901
		-10	3.82688	-0.198929		-10	3.82688	-0.413929
		-10	3.83712	-0.216179		-10	3.83712	-0.417709
		-10	3.84736	-0.212448		-10	3.84736	-0.416389
		-10	3.8576	-0.207207		-10	3.8576	-0.41457
		-10	3.86784	-0.196442		-10	3.86784	-0.412395
		-10	3.87808	-0.184391		-10	3.87808	-0.412743
		-10	3.88832	-0.178341		-10	3.88832	-0.410458
		-10	3.89856	-0.185139		-10	3.89856	-0.39867
		-10	3.9088	-0.204929		-10	3.9088	-0.397373
		-10	3.91904	-0.206909		-10	3.91904	-0.398823
		-10	3.92928	-0.220676		-10	3.92928	-0.391384
		-10	3.93952	-0.205509		-10	3.93952	-0.390606
		-10	3.94976	-0.186466		-10	3.94976	-0.410007
		-10	3.96	-0.186882		-10	3.96	-0.427917
		-10	3.97024	-0.190567		-10	3.97024	-0.440502
		-10	3.98048	-0.193249		-10	3.98048	-0.452206
		-10	3.99072	-0.18935		-10	3.99072	-0.468227
		-10	4.00096	-0.203751		-10	4.00096	-0.472355
		-10	4.0112	-0.203381		-10	4.0112	-0.468853
		-10	4.02144	-0.208202		-10	4.02144	-0.453186
		-10	4.03168	-0.205227		-10	4.03168	-0.439346
		-10	4.04192	-0.20755		-10	4.04192	-0.432636
		-10	4.05216	-0.231899		-10	4.05216	-0.422474
		-10	4.0624	-0.240265		-10	4.0624	-0.425426
		-10	4.07264	-0.233322		-10	4.07264	-0.438286
		-10	4.08288	-0.236237		-10	4.08288	-0.437073
		-10	4.09312	-0.256004		-10	4.09312	-0.417416
		-10	4.10336	-0.267178		-10	4.10336	-0.401463
		-10	4.1136	-0.27383		-10	4.1136	-0.405441
		-10	4.12384	-0.268211		-10	4.12384	-0.431267
		-10	4.13408	-0.27095		-10	4.13408	-0.424358
		-10	4.14432	-0.267719		-10	4.14432	-0.428787
		-10	4.15456	-0.271286		-10	4.15456	-0.442146
		-10	4.1648	-0.268951		-10	4.1648	-0.448097
		-10	4.17504	-0.26759		-10	4.17504	-0.444252
		-10	4.18528	-0.265759		-10	4.18528	-0.44149
		-10	4.19552	-0.276653		-10	4.19552	-0.430637
		-10	4.20576	-0.301525		-10	4.20576	-0.433338
		-10	4.216	-0.328625		-10	4.216	-0.444218
		-10	4.22624	-0.336895		-10	4.22624	-0.445992
		-10	4.23648	-0.337662		-10	4.23648	-0.442242
		-10	4.24672	-0.329765		-10	4.24672	-0.437168
		-10	4.25696	-0.318916		-10	4.25696	-0.431988
		-10	4.2672	-0.314701		-10	4.2672	-0.422142
		-10	4.27744	-0.303398		-10	4.27744	-0.434227
		-10	4.28768	-0.32753		-10	4.28768	-0.455135
		-10	4.29792	-0.374638		-10	4.29792	-0.456104
		-10	4.30816	-0.4203		-10	4.30816	-0.444706
		-10	4.3184	-0.424007		-10	4.3184	-0.435795
		-10	4.32864	-0.421326		-10	4.32864	-0.42281
		-10	4.33888	-0.436272		-10	4.33888	-0.421459
		-10	4.34912	-0.43457		-10	4.34912	-0.431034
		-10	4.35936	-0.433212		-10	4.35936	-0.403198
		-10	4.3696	-0.419151		-10	4.3696	-0.373821
		-10	4.37984	-0.412361		-10	4.37984	-0.368935
		-10	4.39008	-0.399704		-10	4.39008	-0.362297
		-10	4.40032	-0.400875		-10	4.40032	-0.375984
		-10	4.41056	-0.428352		-10	4.41056	-0.399349
		-10	4.4208	-0.436546		-10	4.4208	-0.417347
		-10	4.43104	-0.427628		-10	4.43104	-0.424915
		-10	4.44128	-0.432575		-10	4.44128	-0.445332
		-10	4.45152	-0.424004		-10	4.45152	-0.43755
		-10	4.46176	-0.408337		-10	4.46176	-0.428066
		-10	4.472	-0.413574		-10	4.472	-0.430523
		-10	4.48224	-0.413193		-10	4.48224	-0.431435
		-10	4.49248	-0.439323		-10	4.49248	-0.440075
		-10	4.50272	-0.464214		-10	4.50272	-0.43401
		-10	4.51296	-0.469013		-10	4.51296	-0.433994
		-10	4.5232	-0.473553		-10	4.5232	-0.438133
		-10	4.53344	-0.46743		-10	4.53344	-0.422226
		-10	4.54368	-0.466923		-10	4.54368	-0.407963
		-10	4.55392	-0.500366		-10	4.55392	-0.405441
		-10	4.56416	-0.532631		-10	4.56416	-0.382942
		-10	4.5744	-0.51646		-10	4.5744	-0.367405
		-10	4.58464	-0.501461		-10	4.58464	-0.348442
		-10	4.59488	-0.488018		-10	4.59488	-0.362072
		-10	4.60512	-0.490021		-10	4.60512	-0.373405
		-10	4.61536	-0.492752		-10	4.61536	-0.36694
		-10	4.6256	-0.476181		-10	4.6256	-0.355991
		-10	4.63584	-0.460728		-10	4.63584	-0.367493
		-10	4.64608	-0.451073		-10	4.64608	-0.377426
		-10	4.65632	-0.45575		-10	4.65632	-0.36182
		-10	4.66656	-0.459015		-10	4.66656	-0.355728
		-10	4.6768	-0.469204		-10	4.6768	-0.356125
		-10	4.68704	-0.481823		-10	4.68704	-0.345474
		-10	4.69728	-0.512161		-10	4.69728	-0.34119
		-10	4.70752	-0.517864		-10	4.70752	-0.365807
		-10	4.71776	-0.516838		-10	4.71776	-0.38995
		-10	4.728	-0.524323		-10	4.728	-0.408916
		-10	4.73824	-0.523888		-10	4.73824	-0.419918
		-10	4.74848	-0.506733		-10	4.74848	-0.417133
		-10	4.75872	-0.476162		-10	4.75872	-0.402893
		-10	4.76896	-0.466057		-10	4.76896	-0.383907
		-10	4.7792	-0.454018		-10	4.7792	-0.354179
		-10	4.78944	-0.449944		-10	4.78944	-0.353291
		-10	4.79968	-0.457954		-10	4.79968	-0.373402
		-10	4.80992	-0.469315		-10	4.80992	-0.370583
		-10	4.82016	-0.459129		-10	4.82016	-0.371574
		-10	4.8304	-0.465702		-10	4.8304	-0.373226
		-10	4.84064	-0.46978		-10	4.84064	-0.369297
		-10	4.85088	-0.474602		-10	4.85088	-0.348629
		-10	4.86112	-0.491539		-10	4.86112	-0.346664
		-10	4.87136	-0.497501		-10	4.87136	-0.352528
		-10	4.8816	-0.478649		-10	4.8816	-0.350395
		-10	4.89184	-0.473629		-10	4.89184	-0.358963
		-10	4.90208	-0.468689		-10	4.90208	-0.330986
		-10	4.91232	-0.477566		-10	4.91232	-0.332401
		-10	4.92256	-0.479214		-10	4.92256	-0.33844
		-10	4.9328	-0.466869		-10	4.9328	-0.348587
		-10	4.94304	-0.470211		-10	4.94304	-0.331806
		-10	4.95328	-0.466587		-10	4.95328	-0.33799
		-10	4.96352	-0.4631		-10	4.96352	-0.354408
		-10	4.97376	-0.464626		-10	4.97376	-0.374256
		-10	4.984	-0.447693		-10	4.984	-0.371487
		-10	4.99424	-0.419308		-10	4.99424	-0.363045
		-10	5.00448	-0.409489		-10	5.00448	-0.370342
		-10	5.01472	-0.4081		-10	5.01472	-0.388611
		-10	5.02496	-0.40427		-10	5.02496	-0.389553
		-10	5.0352	-0.394855		-10	5.0352	-0.377964
		-10	5.04544	-0.375828		-10	5.04544	-0.353279
		-10	5.05568	-0.35487		-10	5.05568	-0.35881
		-10	5.06592	-0.369255		-10	5.06592	-0.371803
		-10	5.07616	-0.37413		-10	5.07616	-0.368423
		-10	5.0864	-0.392456		-10	5.0864	-0.375866
		-10	5.09664	-0.402111		-10	5.09664	-0.377499
		-10	5.10688	-0.40123		-10	5.10688	-0.389332
		-10	5.11712	-0.418335		-10	5.11712	-0.398899
		-10	5.12736	-0.444954		-10	5.12736	-0.391804
		-10	5.1376	-0.433315		-10	5.1376	-0.395287
		-10	5.14784	-0.432114		-10	5.14784	-0.413872
		-10	5.15808	-0.415321		-10	5.15808	-0.446678
		-10	5.16832	-0.389595		-10	5.16832	-0.468796
		-10	5.17856	-0.376579		-10	5.17856	-0.473446
		-10	5.1888	-0.387959		-10	5.1888	-0.471333
		-10	5.19904	-0.372261		-10	5.19904	-0.459908
		-10	5.20928	-0.335125		-10	5.20928	-0.464451
		-10	5.21952	-0.303085		-10	5.21952	-0.458317
		-10	5.22976	-0.303337		-10	5.22976	-0.458469
		-10	5.24	-0.297344		-10	5.24	-0.467663
		-10	5.25024	-0.30151		-10	5.25024	-0.450195
		-10	5.26048	-0.306442		-10	5.26048	-0.44759
		-10	5.27072	-0.31628		-10	5.27072	-0.448982
		-10	5.28096	-0.330933		-10	5.28096	-0.458569
		-10	5.2912	-0.336113		-10	5.2912	-0.457279
		-10	5.30144	-0.31398		-10	5.30144	-0.444553
		-10	5.31168	-0.31171		-10	5.31168	-0.442245
		-10	5.32192	-0.329372		-10	5.32192	-0.439384
		-10	5.33216	-0.340744		-10	5.33216	-0.467964
		-10	5.3424	-0.331985		-10	5.3424	-0.481873
		-10	5.35264	-0.302094		-10	5.35264	-0.488407
		-10	5.36288	-0.298233		-10	5.36288	-0.495712
		-10	5.37312	-0.301403		-10	5.37312	-0.494347
		-10	5.38336	-0.328709		-10	5.38336	-0.485176
		-10	5.3936	-0.349529		-10	5.3936	-0.48344
		-10	5.40384	-0.340939		-10	5.40384	-0.485935
		-10	5.41408	-0.320953		-10	5.41408	-0.489361
		-10	5.42432	-0.323708		-10	5.42432	-0.476128
		-10	5.43456	-0.302429		-10	5.43456	-0.451237
		-10	5.4448	-0.314781		-10	5.4448	-0.439304
		-10	5.45504	-0.314819		-10	5.45504	-0.434681
		-10	5.46528	-0.289974		-10	5.46528	-0.459438
		-10	5.47552	-0.252987		-10	5.47552	-0.479885
		-10	5.48576	-0.20787		-10	5.48576	-0.475845
		-10	5.496	-0.185776		-10	5.496	-0.445694
		-10	5.50624	-0.192844		-10	5.50624	-0.422478
		-10	5.51648	-0.211143		-10	5.51648	-0.432514
		-10	5.52672	-0.222385		-10	5.52672	-0.433079
		-10	5.53696	-0.235634		-10	5.53696	-0.409565
		-10	5.5472	-0.230896		-10	5.5472	-0.397987
		-10	5.55744	-0.198257		-10	5.55744	-0.387169
		-10	5.56768	-0.174789		-10	5.56768	-0.403008
		-10	5.57792	-0.183414		-10	5.57792	-0.410423
		-10	5.58816	-0.181175		-10	5.58816	-0.422325
		-10	5.5984	-0.171352		-10	5.5984	-0.444153
		-10	5.60864	-0.143963		-10	5.60864	-0.457863
		-10	5.61888	-0.152203		-10	5.61888	-0.466377
		-10	5.62912	-0.154507		-10	5.62912	-0.457802
		-10	5.63936	-0.161728		-10	5.63936	-0.445152
		-10	5.6496	-0.132668		-10	5.6496	-0.40942
		-10	5.65984	-0.0902748		-10	5.65984	-0.390781
		-10	5.67008	-0.0754395		-10	5.67008	-0.389549
		-10	5.68032	-0.0597038		-10	5.68032	-0.399242
		-10	5.69056	-0.0616302		-10	5.69056	-0.402981
		-10	5.7008	-0.0565338		-10	5.7008	-0.416447
		-10	5.71104	-0.0441093		-10	5.71104	-0.414005
		-10	5.72128	-0.0252495		-10	5.72128	-0.399403
		-10	5.73152	-0.0240669		-10	5.73152	-0.398476
		-10	5.74176	-0.0309715		-10	5.74176	-0.414856
		-10	5.752	-0.0391541		-10	5.752	-0.394642
		-10	5.76224	-0.0299072		-10	5.76224	-0.395561
		-10	5.77248	-0.022438		-10	5.77248	-0.397503
		-10	5.78272	-0.0198097		-10	5.78272	-0.398235
		-10	5.79296	-0.0100365		-10	5.79296	-0.380657
		-10	5.8032	-0.00437927		-10	5.8032	-0.362759
		-10	5.81344	-0.000564575		-10	5.81344	-0.355408
		-10	5.82368	0.0101204		-10	5.82368	-0.362354
		-10	5.83392	0.00876617		-10	5.83392	-0.369541
		-10	5.84416	0.0203819		-10	5.84416	-0.345982
		-10	5.8544	0.0319977		-10	5.8544	-0.350952
		-10	5.86464	0.0623131		-10	5.86464	-0.367065
		-10	5.87488	0.0769691		-10	5.87488	-0.389393
		-10	5.88512	0.0949287		-10	5.88512	-0.40086
		-10	5.89536	0.106098		-10	5.89536	-0.390026
		-10	5.9056	0.0962563		-10	5.9056	-0.393414
		-10	5.91584	0.0873337		-10	5.91584	-0.380569
		-10	5.92608	0.078392		-10	5.92608	-0.377357
		-10	5.93632	0.0853195		-10	5.93632	-0.357307
		-10	5.94656	0.0879898		-10	5.94656	-0.339176
		-10	5.9568	0.101959		-10	5.9568	-0.324966
		-10	5.96704	0.118439		-10	5.96704	-0.335571
		-10	5.97728	0.139359		-10	5.97728	-0.327248
		-10	5.98752	0.155109		-10	5.98752	-0.317646
		-10	5.99776	0.150383		-10	5.99776	-0.319714
		-10	6.008	0.153782		-10	6.008	-0.348282
		-10	6.01824	0.143764		-10	6.01824	-0.368427
		-10	6.02848	0.155697		-10	6.02848	-0.355991
		-10	6.03872	0.184139		-10	6.03872	-0.342834
		-10	6.04896	0.195778		-10	6.04896	-0.331203
		-10	6.0592	0.206558		-10	6.0592	-0.320621
		-10	6.06944	0.230122		-10	6.06944	-0.315258
		-10	6.07968	0.233742		-10	6.07968	-0.293465
		-10	6.08992	0.217697		-10	6.08992	-0.270664
		-10	6.10016	0.200527		-10	6.10016	-0.263386
		-10	6.1104	0.19833		-10	6.1104	-0.265862
		-10	6.12064	0.220184		-10	6.12064	-0.272171
		-10	6.13088	0.25272		-10	6.13088	-0.285255
		-10	6.14112	0.275654		-10	6.14112	-0.278442
		-10	6.15136	0.28793		-10	6.15136	-0.276695
		-10	6.1616	0.293629		-10	6.1616	-0.279137
		-10	6.17184	0.306385		-10	6.17184	-0.284668
		-10	6.18208	0.307541		-10	6.18208	-0.286915
		-10	6.19232	0.291763		-10	6.19232	-0.296196
		-10	6.20256	0.279549		-10	6.20256	-0.287674
		-10	6.2128	0.271378		-10	6.2128	-0.26199
		-10	6.22304	0.253414		-10	6.22304	-0.248512
		-10	6.23328	0.2547		-10	6.23328	-0.258915
		-10	6.24352	0.265446		-10	6.24352	-0.261448
		-10	6.25376	0.285927		-10	6.25376	-0.247433
		-10	6.264	0.301186		-10	6.264	-0.242031
		-10	6.27424	0.300327		-10	6.27424	-0.265743
		-10	6.28448	0.303341		-10	6.28448	-0.262432
		-10	6.29472	0.300831		-10	6.29472	-0.274483
		-10	6.30496	0.282742		-10	6.30496	-0.302689
		-10	6.3152	0.255295		-10	6.3152	-0.31105
		-10	6.32544	0.252567		-10	6.32544	-0.301872
		-10	6.33568	0.256851		-10	6.33568	-0.286739
		-10	6.34592	0.272987		-10	6.34592	-0.274441
		-10	6.35616	0.266788		-10	6.35616	-0.267769
		-10	6.3664	0.251152		-10	6.3664	-0.243595
		-10	6.37664	0.257599		-10	6.37664	-0.217796
		-10	6.38688	0.268661		-10	6.38688	-0.224751
		-10	6.39712	0.273636		-10	6.39712	-0.238045
		-10	6.40736	0.263634		-10	6.40736	-0.227848
		-10	6.4176	0.258823		-10	6.4176	-0.224812
		-10	6.42784	0.240051		-10	6.42784	-0.223343
		-10	6.43808	0.228382		-10	6.43808	-0.22802
		-10	6.44832	0.229187		-10	6.44832	-0.254787
		-10	6.45856	0.246475		-10	6.45856	-0.25877
		-10	6.4688	0.275539		-10	6.4688	-0.24852
		-10	6.47904	0.290745		-10	6.47904	-0.234638
		-10	6.48928	0.30587		-10	6.48928	-0.235508
		-10	6.49952	0.31522		-10	6.49952	-0.222942
		-10	6.50976	0.30801		-10	6.50976	-0.195152
		-10	6.52	0.305168		-10	6.52	-0.185863
		-10	6.53024	0.311775		-10	6.53024	-0.197403
		-10	6.54048	0.307369		-10	6.54048	-0.227947
		-10	6.55072	0.316639		-10	6.55072	-0.223576
		-10	6.56096	0.324562		-10	6.56096	-0.209633
		-10	6.5712	0.343964		-10	6.5712	-0.219181
		-10	6.58144	0.323528		-10	6.58144	-0.248875
		-10	6.59168	0.323353		-10	6.59168	-0.252895
		-10	6.60192	0.326405		-10	6.60192	-0.241749
		-10	6.61216	0.328678		-10	6.61216	-0.229252
		-10	6.6224	0.314686		-10	6.6224	-0.200588
		-10	6.63264	0.29871		-10	6.63264	-0.198017
		-10	6.64288	0.278706		-10	6.64288	-0.212341
		-10	6.65312	0.27211		-10	6.65312	-0.230022
		-10	6.66336	0.284595		-10	6.66336	-0.215603
		-10	6.6736	0.272511		-10	6.6736	-0.202934
		-10	6.68384	0.261528		-10	6.68384	-0.21978
		-10	6.69408	0.250408		-10	6.69408	-0.24065
		-10	6.70432	0.257023		-10	6.70432	-0.262878
		-10	6.71456	0.236656		-10	6.71456	-0.268173
		-10	6.7248	0.228775		-10	6.7248	-0.260628
		-10	6.73504	0.220554		-10	6.73504	-0.232372
		-10	6.74528	0.216099		-10	6.74528	-0.225204
		-10	6.75552	0.220642		-10	6.75552	-0.242596
		-10	6.76576	0.241581		-10	6.76576	-0.237072
		-10	6.776	0.26141		-10	6.776	-0.239254
		-10	6.78624	0.28598		-10	6.78624	-0.262184
		-10	6.79648	0.268055		-10	6.79648	-0.247311
		-10	6.80672	0.222733		-10	6.80672	-0.227779
		-10	6.81696	0.178177		-10	6.81696	-0.212593
		-10	6.8272	0.157337		-10	6.8272	-0.207573
		-10	6.83744	0.166111		-10	6.83744	-0.208172
		-10	6.84768	0.182613		-10	6.84768	-0.23011
		-10	6.85792	0.186916		-10	6.85792	-0.238026
		-10	6.86816	0.194244		-10	6.86816	-0.225201
		-10	6.8784	0.192204		-10	6.8784	-0.21862
		-10	6.88864	0.178886		-10	6.88864	-0.233105
		-10	6.89888	0.177895		-10	6.89888	-0.259605
		-10	6.90912	0.155304		-10	6.90912	-0.271172
		-10	6.91936	0.149277		-10	6.91936	-0.266674
		-10	6.9296	0.161854		-10	6.9296	-0.25515
		-10	6.93984	0.157982		-10	6.93984	-0.243416
		-10	6.95008	0.144051		-10	6.95008	-0.248497
		-10	6.96032	0.134094		-10	6.96032	-0.253029
		-10	6.97056	0.140434		-10	6.97056	-0.261463
		-10	6.9808	0.138515		-10	6.9808	-0.25219
		-10	6.99104	0.145027		-10	6.99104	-0.257584
		-10	7.00128	0.146793		-10	7.00128	-0.268742
		-10	7.01152	0.138577		-10	7.01152	-0.270626
		-10	7.02176	0.126007		-10	7.02176	-0.262661
		-10	7.032	0.0967216		-10	7.032	-0.253052
		-10	7.04224	0.0885162		-10	7.04224	-0.267353
		-10	7.05248	0.0815887		-10	7.05248	-0.270798
		-10	7.06272	0.0736351		-10	7.06272	-0.301231
		-10	7.07296	0.077961		-10	7.07296	-0.308811
		-10	7.0832	0.0749931		-10	7.0832	-0.293102
		-10	7.09344	0.0691795		-10	7.09344	-0.286728
		-10	7.10368	0.0424385		-10	7.10368	-0.274773
		-10	7.11392	0.0481834		-10	7.11392	-0.264893
		-10	7.12416	0.0484886		-10	7.12416	-0.263977
		-10	7.1344	0.0290222		-10	7.1344	-0.310612
		-10	7.14464	0.0387878		-10	7.14464	-0.334328
		-10	7.15488	0.0489426		-10	7.15488	-0.346947
		-10	7.16512	0.0522156		-10	7.16512	-0.333782
		-10	7.17536	0.0608711		-10	7.17536	-0.321362
		-10	7.1856	0.0653305		-10	7.1856	-0.310024
		-10	7.19584	0.0473595		-10	7.19584	-0.302353
		-10	7.20608	0.0249023		-10	7.20608	-0.278015
		-10	7.21632	0.00381088		-10	7.21632	-0.258648
		-10	7.22656	-0.00424957		-10	7.22656	-0.237003
		-10	7.2368	0.000331879		-10	7.2368	-0.229679
		-10	7.24704	-0.0175629		-10	7.24704	-0.249767
		-10	7.25728	-0.0494308		-10	7.25728	-0.26067
		-10	7.26752	-0.0633698		-10	7.26752	-0.257763
		-10	7.27776	-0.0654221		-10	7.27776	-0.265278
		-10	7.288	-0.0604286		-10	7.288	-0.292736
		-10	7.29824	-0.076973		-10	7.29824	-0.320702
		-10	7.30848	-0.0835266		-10	7.30848	-0.356674
		-10	7.31872	-0.0659332		-10	7.31872	-0.361828
		-10	7.32896	-0.0768051		-10	7.32896	-0.349834
		-10	7.3392	-0.0924988		-10	7.3392	-0.322159
		-10	7.34944	-0.12315		-10	7.34944	-0.298805
		-10	7.35968	-0.116158		-10	7.35968	-0.277737
		-10	7.36992	-0.124954		-10	7.36992	-0.260422
		-10	7.38016	-0.132076		-10	7.38016	-0.257935
		-10	7.3904	-0.148777		-10	7.3904	-0.263115
		-10	7.40064	-0.153713		-10	7.40064	-0.27557
		-10	7.41088	-0.147884		-10	7.41088	-0.268425
		-10	7.42112	-0.133724		-10	7.42112	-0.26363
		-10	7.43136	-0.124741		-10	7.43136	-0.272217
		-10	7.4416	-0.124268		-10	7.4416	-0.281303
		-10	7.45184	-0.137398		-10	7.45184	-0.290634
		-10	7.46208	-0.156639		-10	7.46208	-0.274799
		-10	7.47232	-0.156174		-10	7.47232	-0.263771
		-10	7.48256	-0.151039		-10	7.48256	-0.258537
		-10	7.4928	-0.151306		-10	7.4928	-0.235836
		-10	7.50304	-0.150978		-10	7.50304	-0.226604
		-10	7.51328	-0.120991		-10	7.51328	-0.230515
		-10	7.52352	-0.0867233		-10	7.52352	-0.220406
		-10	7.53376	-0.0878487		-10	7.53376	-0.210819
		-10	7.544	-0.101383		-10	7.544	-0.191174
		-10	7.55424	-0.115723		-10	7.55424	-0.183372
		-10	7.56448	-0.126019		-10	7.56448	-0.195545
		-10	7.57472	-0.137722		-10	7.57472	-0.19873
		-10	7.58496	-0.144089		-10	7.58496	-0.198261
		-10	7.5952	-0.156864		-10	7.5952	-0.205769
		-10	7.60544	-0.178509		-10	7.60544	-0.207565
		-10	7.61568	-0.177448		-10	7.61568	-0.194298
		-10	7.62592	-0.163216		-10	7.62592	-0.176022
		-10	7.63616	-0.157982		-10	7.63616	-0.178123
		-10	7.6464	-0.144287		-10	7.6464	-0.180302
		-10	7.65664	-0.141422		-10	7.65664	-0.164349
		-10	7.66688	-0.148422		-10	7.66688	-0.165848
		-10	7.67712	-0.141949		-10	7.67712	-0.193104
		-10	7.68736	-0.129662		-10	7.68736	-0.199993
		-10	7.6976	-0.143391		-10	7.6976	-0.218769
		-10	7.70784	-0.154217		-10	7.70784	-0.235622
		-10	7.71808	-0.169552		-10	7.71808	-0.241657
		-10	7.72832	-0.176098		-10	7.72832	-0.225883
		-10	7.73856	-0.144146		-10	7.73856	-0.208729
		-10	7.7488	-0.133312		-10	7.7488	-0.209282
		-10	7.75904	-0.121994		-10	7.75904	-0.218742
		-10	7.76928	-0.105263		-10	7.76928	-0.226131
		-10	7.77952	-0.119083		-10	7.77952	-0.219761
		-10	7.78976	-0.13501		-10	7.78976	-0.186924
		-10	7.8	-0.133568		-10	7.8	-0.15712
		-10	7.81024	-0.134594		-10	7.81024	-0.15609
		-10	7.82048	-0.155121		-10	7.82048	-0.165382
		-10	7.83072	-0.190487		-10	7.83072	-0.165531
		-10	7.84096	-0.208054		-10	7.84096	-0.19392
		-10	7.8512	-0.19455		-10	7.8512	-0.178982
		-10	7.86144	-0.158974		-10	7.86144	-0.160137
		-10	7.87168	-0.123028		-10	7.87168	-0.130562
		-10	7.88192	-0.137344		-10	7.88192	-0.142437
		-10	7.89216	-0.152603		-10	7.89216	-0.141903
		-10	7.9024	-0.13958		-10	7.9024	-0.133137
		-10	7.91264	-0.11763		-10	7.91264	-0.13316
		-10	7.92288	-0.11903		-10	7.92288	-0.146255
		-10	7.93312	-0.120365		-10	7.93312	-0.152493
		-10	7.94336	-0.0953827		-10	7.94336	-0.140312
		-10	7.9536	-0.079567		-10	7.9536	-0.137554
		-10	7.96384	-0.0861969		-10	7.96384	-0.132389
		-10	7.97408	-0.0996475		-10	7.97408	-0.115314
		-10	7.98432	-0.092804		-10	7.98432	-0.126133
		-10	7.99456	-0.091217		-10	7.99456	-0.157188
		-10	8.0048	-0.115692		-10	8.0048	-0.16819
		-10	8.01504	-0.123356		-10	8.01504	-0.160954
		-10	8.02528	-0.135151		-10	8.02528	-0.162037
		-10	8.03552	-0.154209		-10	8.03552	-0.165489
		-10	8.04576	-0.154648		-10	8.04576	-0.168465
		-10	8.056	-0.162716		-10	8.056	-0.160866
		-10	8.06624	-0.15197		-10	8.06624	-0.144157
		-10	8.07648	-0.150211		-10	8.07648	-0.105644
		-10	8.08672	-0.148624		-10	8.08672	-0.083477
		-10	8.09696	-0.168678		-10	8.09696	-0.0791473
		-10	8.1072	-0.207321		-10	8.1072	-0.0892944
		-10	8.11744	-0.236027		-10	8.11744	-0.104671
		-10	8.12768	-0.235344		-10	8.12768	-0.114605
		-10	8.13792	-0.238194		-10	8.13792	-0.127403
		-10	8.14816	-0.22683		-10	8.14816	-0.147816
		-10	8.1584	-0.218124		-10	8.1584	-0.166698
		-10	8.16864	-0.214119		-10	8.16864	-0.159885
		-10	8.17888	-0.211185		-10	8.17888	-0.148495
		-10	8.18912	-0.213989		-10	8.18912	-0.141773
		-10	8.19936	-0.225368		-10	8.19936	-0.128841
		-10	8.2096	-0.230865		-10	8.2096	-0.119499
		-10	8.21984	-0.234901		-10	8.21984	-0.12875
		-10	8.23008	-0.247826		-10	8.23008	-0.11787
		-10	8.24032	-0.270756		-10	8.24032	-0.11422
		-10	8.25056	-0.292328		-10	8.25056	-0.12051
		-10	8.2608	-0.303101		-10	8.2608	-0.118641
		-10	8.27104	-0.3372		-10	8.27104	-0.136093
		-10	8.28128	-0.360649		-10	8.28128	-0.147568
		-10	8.29152	-0.343826		-10	8.29152	-0.157314
		-10	8.30176	-0.333183		-10	8.30176	-0.166557
		-10	8.312	-0.330666		-10	8.312	-0.179745
		-10	8.32224	-0.352291		-10	8.32224	-0.156185
		-10	8.33248	-0.336006		-10	8.33248	-0.171177
		-10	8.34272	-0.325947		-10	8.34272	-0.177567
		-10	8.35296	-0.329792		-10	8.35296	-0.166763
		-10	8.3632	-0.339996		-10	8.3632	-0.157455
		-10	8.37344	-0.361469		-10	8.37344	-0.125771
		-10	8.38368	-0.371323		-10	8.38368	-0.119045
		-10	8.39392	-0.348228		-10	8.39392	-0.130199
		-10	8.40416	-0.325897		-10	8.40416	-0.132973
		-10	8.4144	-0.340576		-10	8.4144	-0.133057
		-10	8.42464	-0.370258		-10	8.42464	-0.138386
		-10	8.43488	-0.39418		-10	8.43488	-0.15918
		-10	8.44512	-0.400364		-10	8.44512	-0.170918
		-10	8.45536	-0.410496		-10	8.45536	-0.188259
		-10	8.4656	-0.414158		-10	8.4656	-0.214977
		-10	8.47584	-0.378731		-10	8.47584	-0.215649
		-10	8.48608	-0.349888		-10	8.48608	-0.20314
		-10	8.49632	-0.353111		-10	8.49632	-0.198479
		-10	8.50656	-0.367741		-10	8.50656	-0.193165
		-10	8.5168	-0.383591		-10	8.5168	-0.188755
		-10	8.52704	-0.387699		-10	8.52704	-0.199112
		-10	8.53728	-0.38134		-10	8.53728	-0.198044
		-10	8.54752	-0.365978		-10	8.54752	-0.182232
		-10	8.55776	-0.366131		-10	8.55776	-0.174461
		-10	8.568	-0.384235		-10	8.568	-0.185448
		-10	8.57824	-0.4049		-10	8.57824	-0.201424
		-10	8.58848	-0.39856		-10	8.58848	-0.227238
		-10	8.59872	-0.374592		-10	8.59872	-0.253613
		-10	8.60896	-0.375072		-10	8.60896	-0.238731
		-10	8.6192	-0.368614		-10	8.6192	-0.220291
		-10	8.62944	-0.345352		-10	8.62944	-0.230953
		-10	8.63968	-0.340008		-10	8.63968	-0.224464
		-10	8.64992	-0.353737		-10	8.64992	-0.210735
		-10	8.66016	-0.377975		-10	8.66016	-0.202457
		-10	8.6704	-0.367947		-10	8.6704	-0.206341
		-10	8.68064	-0.374454		-10	8.68064	-0.184105
		-10	8.69088	-0.371365		-10	8.69088	-0.170986
		-10	8.70112	-0.379917		-10	8.70112	-0.179611
		-10	8.71136	-0.383583		-10	8.71136	-0.153965
		-10	8.7216	-0.368542		-10	8.7216	-0.160107
		-10	8.73184	-0.369987		-10	8.73184	-0.18401
		-10	8.74208	-0.379459		-10	8.74208	-0.217342
		-10	8.75232	-0.390862		-10	8.75232	-0.22665
		-10	8.76256	-0.390789		-10	8.76256	-0.22015
		-10	8.7728	-0.377804		-10	8.7728	-0.212654
		-10	8.78304	-0.37067		-10	8.78304	-0.185921
		-10	8.79328	-0.36179		-10	8.79328	-0.174053
		-10	8.80352	-0.356354		-10	8.80352	-0.171753
		-10	8.81376	-0.351166		-10	8.81376	-0.197338
		-10	8.824	-0.356884		-10	8.824	-0.213406
		-10	8.83424	-0.340736		-10	8.83424	-0.223885
		-10	8.84448	-0.322433		-10	8.84448	-0.216183
		-10	8.85472	-0.313385		-10	8.85472	-0.218349
		-10	8.86496	-0.318844		-10	8.86496	-0.221729
		-10	8.8752	-0.326015		-10	8.8752	-0.199059
		-10	8.88544	-0.329018		-10	8.88544	-0.18811
		-10	8.89568	-0.33186		-10	8.89568	-0.168896
		-10	8.90592	-0.317604		-10	8.90592	-0.181396
		-10	8.91616	-0.291649		-10	8.91616	-0.188194
		-10	8.9264	-0.288548		-10	8.9264	-0.187752
		-10	8.93664	-0.294331		-10	8.93664	-0.204327
		-10	8.94688	-0.287533		-10	8.94688	-0.208206
		-10	8.95712	-0.283386		-10	8.95712	-0.214432
		-10	8.96736	-0.285538		-10	8.96736	-0.213482
		-10	8.9776	-0.289825		-10	8.9776	-0.208931
		-10	8.98784	-0.289024		-10	8.98784	-0.236526
		-10	8.99808	-0.29208		-10	8.99808	-0.238235
		-10	9.00832	-0.295998		-10	9.00832	-0.22443
		-10	9.01856	-0.293247		-10	9.01856	-0.205391
		-10	9.0288	-0.278233		-10	9.0288	-0.188358
		-10	9.03904	-0.283459		-10	9.03904	-0.172485
		-10	9.04928	-0.297085		-10	9.04928	-0.163105
		-10	9.05952	-0.320198		-10	9.05952	-0.161831
		-10	9.06976	-0.338707		-10	9.06976	-0.14603
		-10	9.08	-0.34354		-10	9.08	-0.169544
		-10	9.09024	-0.331829		-10	9.09024	-0.203575
		-10	9.10048	-0.315956		-10	9.10048	-0.238903
		-10	9.11072	-0.308159		-10	9.11072	-0.255127
		-10	9.12096	-0.306335		-10	9.12096	-0.253532
		-10	9.1312	-0.311008		-10	9.1312	-0.252987
		-10	9.14144	-0.317478		-10	9.14144	-0.263542
		-10	9.15168	-0.310558		-10	9.15168	-0.290302
		-10	9.16192	-0.28664		-10	9.16192	-0.303635
		-10	9.17216	-0.278435		-10	9.17216	-0.289669
		-10	9.1824	-0.282501		-10	9.1824	-0.297031
		-10	9.19264	-0.30146		-10	9.19264	-0.308422
		-10	9.20288	-0.300274		-10	9.20288	-0.320072
		-10	9.21312	-0.329418		-10	9.21312	-0.315132
		-10	9.22336	-0.346863		-10	9.22336	-0.340763
		-10	9.2336	-0.372967		-10	9.2336	-0.355816
		-10	9.24384	-0.373001		-10	9.24384	-0.342758
		-10	9.25408	-0.354744		-10	9.25408	-0.327641
		-10	9.26432	-0.334736		-10	9.26432	-0.309895
		-10	9.27456	-0.329739		-10	9.27456	-0.292534
		-10	9.2848	-0.319965		-10	9.2848	-0.270012
		-10	9.29504	-0.315792		-10	9.29504	-0.259617
		-10	9.30528	-0.304951		-10	9.30528	-0.254501
		-10	9.31552	-0.307194		-10	9.31552	-0.219765
		-10	9.32576	-0.322159		-10	9.32576	-0.219028
		-10	9.336	-0.332302		-10	9.336	-0.224125
		-10	9.34624	-0.337917		-10	9.34624	-0.216293
		-10	9.35648	-0.321587		-10	9.35648	-0.213562
		-10	9.36672	-0.295574		-10	9.36672	-0.216728
		-10	9.37696	-0.287453		-10	9.37696	-0.222652
		-10	9.3872	-0.285801		-10	9.3872	-0.222031
		-10	9.39744	-0.271545		-10	9.39744	-0.21632
		-10	9.40768	-0.290485		-10	9.40768	-0.202602
		-10	9.41792	-0.326626		-10	9.41792	-0.187916
		-10	9.42816	-0.32856		-10	9.42816	-0.155117
		-10	9.4384	-0.326252		-10	9.4384	-0.137836
		-10	9.44864	-0.313461		-10	9.44864	-0.145287
		-10	9.45888	-0.295197		-10	9.45888	-0.144005
		-10	9.46912	-0.281639		-10	9.46912	-0.142197
		-10	9.47936	-0.278011		-10	9.47936	-0.134201
		-10	9.4896	-0.258343		-10	9.4896	-0.143703
		-10	9.49984	-0.264683		-10	9.49984	-0.14159
		-10	9.51008	-0.267281		-10	9.51008	-0.138573
		-10	9.52032	-0.281452		-10	9.52032	-0.130253
		-10	9.53056	-0.292236		-10	9.53056	-0.122627
		-10	9.5408	-0.29694		-10	9.5408	-0.101448
		-10	9.55104	-0.300072		-10	9.55104	-0.105442
		-10	9.56128	-0.305202		-10	9.56128	-0.0913658
		-10	9.57152	-0.324467		-10	9.57152	-0.0676384
		-10	9.58176	-0.332558		-10	9.58176	-0.0720482
		-10	9.592	-0.343918		-10	9.592	-0.0791512
		-10	9.60224	-0.341072		-10	9.60224	-0.0976715
		-10	9.61248	-0.323315		-10	9.61248	-0.0993042
		-10	9.62272	-0.330414		-10	9.62272	-0.091465
		-10	9.63296	-0.337112		-10	9.63296	-0.0928726
		-10	9.6432	-0.323318		-10	9.6432	-0.10865
		-10	9.65344	-0.323265		-10	9.65344	-0.127705
		-10	9.66368	-0.318386		-10	9.66368	-0.133816
		-10	9.67392	-0.314842		-10	9.67392	-0.13834
		-10	9.68416	-0.294277		-10	9.68416	-0.163567
		-10	9.6944	-0.293087		-10	9.6944	-0.181259
		-10	9.70464	-0.315788		-10	9.70464	-0.176319
		-10	9.71488	-0.319344		-10	9.71488	-0.182507
		-10	9.72512	-0.32338		-10	9.72512	-0.172535
		-10	9.73536	-0.342541		-10	9.73536	-0.174107
		-10	9.7456	-0.327946		-10	9.7456	-0.181015
		-10	9.75584	-0.312466		-10	9.75584	-0.174809
		-10	9.76608	-0.292736		-10	9.76608	-0.147411
		-10	9.77632	-0.282257		-10	9.77632	-0.145702
		-10	9.78656	-0.279858		-10	9.78656	-0.151257
		-10	9.7968	-0.27718		-10	9.7968	-0.160854
		-10	9.80704	-0.257854		-10	9.80704	-0.168484
		-10	9.81728	-0.242928		-10	9.81728	-0.164734
		-10	9.82752	-0.246906		-10	9.82752	-0.192684
		-10	9.83776	-0.261497		-10	9.83776	-0.214165
		-10	9.848	-0.285702		-10	9.848	-0.214794
		-10	9.85824	-0.295792		-10	9.85824	-0.195503
		-10	9.86848	-0.299667		-10	9.86848	-0.177876
		-10	9.87872	-0.291336		-10	9.87872	-0.188686
		-10	9.88896	-0.278759		-10	9.88896	-0.198818
		-10	9.8992	-0.266815		-10	9.8992	-0.187466
		-10	9.90944	-0.275116		-10	9.90944	-0.181717
		-10	9.91968	-0.285538		-10	9.91968	-0.171021
		-10	9.92992	-0.301052		-10	9.92992	-0.178909
		-10	9.94016	-0.290661		-10	9.94016	-0.163891
		-10	9.9504	-0.278801		-10	9.9504	-0.15601
		-10	9.96064	-0.276737		-10	9.96064	-0.161221
		-10	9.97088	-0.269745		-10	9.97088	-0.185043
		-10	9.98112	-0.259621		-10	9.98112	-0.195919
		-10	9.99136	-0.253487		-10	9.99136	-0.205185
		-10	10.0016	-0.272526		-10	10.0016	-0.223202
		-10	10.0118	-0.257416		-10	10.0118	-0.248856
		-10	10.0221	-0.243198		-10	10.0221	-0.257217
		-10	10.0323	-0.213394		-10	10.0323	-0.239304
		-10	10.0426	-0.201496		-10	10.0426	-0.22765
		-10	10.0528	-0.202		-10	10.0528	-0.216412
		-10	10.063	-0.214195		-10	10.063	-0.189678
		-10	10.0733	-0.222187		-10	10.0733	-0.164574
		-10	10.0835	-0.236797		-10	10.0835	-0.163639
		-10	10.0938	-0.242294		-10	10.0938	-0.151894
		-10	10.104	-0.24276		-10	10.104	-0.146896
		-10	10.1142	-0.229996		-10	10.1142	-0.164246
		-10	10.1245	-0.194664		-10	10.1245	-0.180519
		-10	10.1347	-0.169552		-10	10.1347	-0.20715
		-10	10.145	-0.17329		-10	10.145	-0.218132
		-10	10.1552	-0.192539		-10	10.1552	-0.212357
		-10	10.1654	-0.224731		-10	10.1654	-0.21299
		-10	10.1757	-0.236538		-10	10.1757	-0.19846
		-10	10.1859	-0.23941		-10	10.1859	-0.184769
		-10	10.1962	-0.238499		-10	10.1962	-0.167793
		-10	10.2064	-0.235199		-10	10.2064	-0.136982
		-10	10.2166	-0.241806		-10	10.2166	-0.121529
		-10	10.2269	-0.227131		-10	10.2269	-0.120327
		-10	10.2371	-0.233383		-10	10.2371	-0.126648
		-10	10.2474	-0.232388		-10	10.2474	-0.137417
		-10	10.2576	-0.210026		-10	10.2576	-0.1665
		-10	10.2678	-0.181828		-10	10.2678	-0.176407
		-10	10.2781	-0.175274		-10	10.2781	-0.169556
		-10	10.2883	-0.179974		-10	10.2883	-0.16201
		-10	10.2986	-0.186386		-10	10.2986	-0.155205
		-10	10.3088	-0.189518		-10	10.3088	-0.143623
		-10	10.319	-0.189842		-10	10.319	-0.127888
		-10	10.3293	-0.200211		-10	10.3293	-0.110622
		-10	10.3395	-0.205196		-10	10.3395	-0.122639
		-10	10.3498	-0.196083		-10	10.3498	-0.141769
		-10	10.36	-0.216755		-10	10.36	-0.167709
		-10	10.3702	-0.220455		-10	10.3702	-0.190384
		-10	10.3805	-0.218113		-10	10.3805	-0.210667
		-10	10.3907	-0.225494		-10	10.3907	-0.203423
		-10	10.401	-0.237362		-10	10.401	-0.197624
		-10	10.4112	-0.24641		-10	10.4112	-0.208874
		-10	10.4214	-0.262276		-10	10.4214	-0.213188
		-10	10.4317	-0.267857		-10	10.4317	-0.203789
		-10	10.4419	-0.243328		-10	10.4419	-0.191944
		-10	10.4522	-0.187199		-10	10.4522	-0.202675
		-10	10.4624	-0.160336		-10	10.4624	-0.230354
		-10	10.4726	-0.177269		-10	10.4726	-0.227982
		-10	10.4829	-0.219421		-10	10.4829	-0.226814
		-10	10.4931	-0.242493		-10	10.4931	-0.206909
		-10	10.5034	-0.270897		-10	10.5034	-0.184074
		-10	10.5136	-0.3139		-10	10.5136	-0.175735
		-10	10.5238	-0.344807		-10	10.5238	-0.185207
		-10	10.5341	-0.35733		-10	10.5341	-0.212551
		-10	10.5443	-0.338158		-10	10.5443	-0.219231
		-10	10.5546	-0.319778		-10	10.5546	-0.238834
		-10	10.5648	-0.324158		-10	10.5648	-0.26334
		-10	10.575	-0.326878		-10	10.575	-0.274616
		-10	10.5853	-0.325653		-10	10.5853	-0.284737
		-10	10.5955	-0.320114		-10	10.5955	-0.267559
		-10	10.6058	-0.317863		-10	10.6058	-0.255814
		-10	10.616	-0.334045		-10	10.616	-0.251396
		-10	10.6262	-0.346848		-10	10.6262	-0.254631
		-10	10.6365	-0.348911		-10	10.6365	-0.258797
		-10	10.6467	-0.345657		-10	10.6467	-0.239578
		-10	10.657	-0.354279		-10	10.657	-0.234543
		-10	10.6672	-0.376556		-10	10.6672	-0.21682
		-10	10.6774	-0.372166		-10	10.6774	-0.211308
		-10	10.6877	-0.377789		-10	10.6877	-0.208958
		-10	10.6979	-0.365158		-10	10.6979	-0.206787
		-10	10.7082	-0.351574		-10	10.7082	-0.21624
		-10	10.7184	-0.345436		-10	10.7184	-0.226036
		-10	10.7286	-0.338638		-10	10.7286	-0.222301
		-10	10.7389	-0.343426		-10	10.7389	-0.230209
		-10	10.7491	-0.360382		-10	10.7491	-0.221615
		-10	10.7594	-0.350029		-10	10.7594	-0.211201
		-10	10.7696	-0.348309		-10	10.7696	-0.216873
		-10	10.7798	-0.356449		-10	10.7798	-0.205151
		-10	10.7901	-0.366558		-10	10.7901	-0.184589
		-10	10.8003	-0.376808		-10	10.8003	-0.18158
		-10	10.8106	-0.373699		-10	10.8106	-0.187561
		-10	10.8208	-0.361107		-10	10.8208	-0.196205
		-10	10.831	-0.367405		-10	10.831	-0.208138
		-10	10.8413	-0.357307		-10	10.8413	-0.220707
		-10	10.8515	-0.348167		-10	10.8515	-0.220135
		-10	10.8618	-0.351681		-10	10.8618	-0.220787
		-10	10.872	-0.376938		-10	10.872	-0.217525
		-10	10.8822	-0.397728		-10	10.8822	-0.216908
		-10	10.8925	-0.381161		-10	10.8925	-0.22559
		-10	10.9027	-0.357658		-10	10.9027	-0.234463
		-10	10.913	-0.35825		-10	10.913	-0.23222
		-10	10.9232	-0.336411		-10	10.9232	-0.260201
		-10	10.9334	-0.32724		-10	10.9334	-0.282726
		-10	10.9437	-0.358166		-10	10.9437	-0.27417
		-10	10.9539	-0.380241		-10	10.9539	-0.278477
		-10	10.9642	-0.394814		-10	10.9642	-0.280346
		-10	10.9744	-0.395683		-10	10.9744	-0.281277
		-10	10.9846	-0.383858		-10	10.9846	-0.276768
		-10	10.9949	-0.364815		-10	10.9949	-0.26659
		-10	11.0051	-0.375351		-10	11.0051	-0.253635
		-10	11.0154	-0.368385		-10	11.0154	-0.250935
		-10	11.0256	-0.335415		-10	11.0256	-0.253544
		-10	11.0358	-0.330421		-10	11.0358	-0.258324
		-10	11.0461	-0.329231		-10	11.0461	-0.268692
		-10	11.0563	-0.351562		-10	11.0563	-0.261517
		-10	11.0666	-0.352947		-10	11.0666	-0.275379
		-10	11.0768	-0.339287		-10	11.0768	-0.277821
		-10	11.087	-0.352295		-10	11.087	-0.285156
		-10	11.0973	-0.386589		-10	11.0973	-0.269341
		-10	11.1075	-0.407917		-10	11.1075	-0.25848
		-10	11.1178	-0.39933		-10	11.1178	-0.248573
		-10	11.128	-0.357304		-10	11.128	-0.24453
		-10	11.1382	-0.315693		-10	11.1382	-0.257225
		-10	11.1485	-0.283207		-10	11.1485	-0.259689
		-10	11.1587	-0.268318		-10	11.1587	-0.269184
		-10	11.169	-0.275654		-10	11.169	-0.281136
		-10	11.1792	-0.28701		-10	11.1792	-0.279057
		-10	11.1894	-0.30048		-10	11.1894	-0.276237
		-10	11.1997	-0.303379		-10	11.1997	-0.283436
		-10	11.2099	-0.317287		-10	11.2099	-0.290161
		-10	11.2202	-0.291691		-10	11.2202	-0.268852
		-10	11.2304	-0.283707		-10	11.2304	-0.255569
		-10	11.2406	-0.296726		-10	11.2406	-0.260548
		-10	11.2509	-0.305115		-10	11.2509	-0.256844
		-10	11.2611	-0.297546		-10	11.2611	-0.257137
		-10	11.2714	-0.27927		-10	11.2714	-0.252632
		-10	11.2816	-0.285706		-10	11.2816	-0.273624
		-10	11.2918	-0.303909		-10	11.2918	-0.29237
		-10	11.3021	-0.297859		-10	11.3021	-0.29253
		-10	11.3123	-0.265789		-10	11.3123	-0.281418
		-10	11.3226	-0.266571		-10	11.3226	-0.302845
		-10	11.3328	-0.249435		-10	11.3328	-0.349545
		-10	11.343	-0.244431		-10	11.343	-0.369816
		-10	11.3533	-0.253601		-10	11.3533	-0.36068
		-10	11.3635	-0.263046		-10	11.3635	-0.335537
		-10	11.3738	-0.278873		-10	11.3738	-0.307178
		-10	11.384	-0.301342		-10	11.384	-0.289997
		-10	11.3942	-0.303989		-10	11.3942	-0.288986
		-10	11.4045	-0.299343		-10	11.4045	-0.315357
		-10	11.4147	-0.296078		-10	11.4147	-0.32798
		-10	11.425	-0.282265		-10	11.425	-0.343742
		-10	11.4352	-0.277184		-10	11.4352	-0.351612
		-10	11.4454	-0.271545		-10	11.4454	-0.342983
		-10	11.4557	-0.27742		-10	11.4557	-0.332684
		-10	11.4659	-0.287373		-10	11.4659	-0.332451
		-10	11.4762	-0.295502		-10	11.4762	-0.340569
		-10	11.4864	-0.295971		-10	11.4864	-0.355736
		-10	11.4966	-0.282063		-10	11.4966	-0.365299
		-10	11.5069	-0.290909		-10	11.5069	-0.34515
		-10	11.5171	-0.29995		-10	11.5171	-0.324379
		-10	11.5274	-0.302277		-10	11.5274	-0.335011
		-10	11.5376	-0.300339		-10	11.5376	-0.343201
		-10	11.5478	-0.295944		-10	11.5478	-0.336674
		-10	11.5581	-0.288296		-10	11.5581	-0.349087
		-10	11.5683	-0.277912		-10	11.5683	-0.344601
		-10	11.5786	-0.270039		-10	11.5786	-0.341389
		-10	11.5888	-0.281719		-10	11.5888	-0.320786
		-10	11.599	-0.302422		-10	11.599	-0.315258
		-10	11.6093	-0.323135		-10	11.6093	-0.308323
		-10	11.6195	-0.30965		-10	11.6195	-0.304134
		-10	11.6298	-0.289894		-10	11.6298	-0.317066
		-10	11.64	-0.293224		-10	11.64	-0.330349
		-10	11.6502	-0.289349		-10	11.6502	-0.358658
		-10	11.6605	-0.293053		-10	11.6605	-0.353947
		-10	11.6707	-0.280636		-10	11.6707	-0.36076
		-10	11.681	-0.292442		-10	11.681	-0.353153
		-10	11.6912	-0.291374		-10	11.6912	-0.343025
		-10	11.7014	-0.290077		-10	11.7014	-0.347569
		-10	11.7117	-0.293285		-10	11.7117	-0.334568
		-10	11.7219	-0.304901		-10	11.7219	-0.322495
		-10	11.7322	-0.315201		-10	11.7322	-0.327404
		-10	11.7424	-0.340256		-10	11.7424	-0.33416
		-10	11.7526	-0.347973		-10	11.7526	-0.320488
		-10	11.7629	-0.352436		-10	11.7629	-0.28194
		-10	11.7731	-0.36916		-10	11.7731	-0.257103
		-10	11.7834	-0.383278		-10	11.7834	-0.25293
		-10	11.7936	-0.36137		-10	11.7936	-0.25843
		-10	11.8038	-0.331963		-10	11.8038	-0.267693
		-10	11.8141	-0.302029		-10	11.8141	-0.266243
		-10	11.8243	-0.284924		-10	11.8243	-0.280132
		-10	11.8346	-0.264324		-10	11.8346	-0.281696
		-10	11.8448	-0.255886		-10	11.8448	-0.299187
		-10	11.855	-0.246933		-10	11.855	-0.2943
		-10	11.8653	-0.237179		-10	11.8653	-0.293701
		-10	11.8755	-0.24733		-10	11.8755	-0.304153
		-10	11.8858	-0.278027		-10	11.8858	-0.330894
		-10	11.896	-0.282223		-10	11.896	-0.345222
		-10	11.9062	-0.265388		-10	11.9062	-0.358864
		-10	11.9165	-0.249249		-10	11.9165	-0.368259
		-10	11.9267	-0.25642		-10	11.9267	-0.355244
		-10	11.937	-0.27285		-10	11.937	-0.341549
		-10	11.9472	-0.266621		-10	11.9472	-0.331902
		-10	11.9574	-0.291901		-10	11.9574	-0.294083
		-10	11.9677	-0.3228		-10	11.9677	-0.288502
		-10	11.9779	-0.323059		-10	11.9779	-0.283798
		-10	11.9882	-0.308865		-10	11.9882	-0.272079
		-10	11.9984	-0.292904		-10	11.9984	-0.277416
		-10	12.0086	-0.297283		-10	12.0086	-0.295513
		-10	12.0189	-0.290215		-10	12.0189	-0.311089
		-10	12.0291	-0.263496		-10	12.0291	-0.282959
		-10	12.0394	-0.218044		-10	12.0394	-0.276512
		-10	12.0496	-0.238216		-10	12.0496	-0.291237
		-10	12.0598	-0.245514		-10	12.0598	-0.313381
		-10	12.0701	-0.249454		-10	12.0701	-0.326099
		-10	12.0803	-0.242374		-10	12.0803	-0.327305
		-10	12.0906	-0.250385		-10	12.0906	-0.327377
		-10	12.1008	-0.260605		-10	12.1008	-0.306828
		-10	12.111	-0.259769		-10	12.111	-0.273411
		-10	12.1213	-0.273743		-10	12.1213	-0.271931
		-10	12.1315	-0.285419		-10	12.1315	-0.271721
		-10	12.1418	-0.277996		-10	12.1418	-0.277485
		-10	12.152	-0.268303		-10	12.152	-0.286068
		-10	12.1622	-0.274071		-10	12.1622	-0.281231
		-10	12.1725	-0.253155		-10	12.1725	-0.286022
		-10	12.1827	-0.239338		-10	12.1827	-0.286377
		-10	12.193	-0.222977		-10	12.193	-0.293446
		-10	12.2032	-0.201935		-10	12.2032	-0.313992
		-10	12.2134	-0.181259		-10	12.2134	-0.327938
		-10	12.2237	-0.182827		-10	12.2237	-0.320545
		-10	12.2339	-0.176674		-10	12.2339	-0.30455
		-10	12.2442	-0.182262		-10	12.2442	-0.309162
		-10	12.2544	-0.205471		-10	12.2544	-0.308228
		-10	12.2646	-0.205814		-10	12.2646	-0.29855
		-10	12.2749	-0.202011		-10	12.2749	-0.291321
		-10	12.2851	-0.193943		-10	12.2851	-0.277214
		-10	12.2954	-0.194065		-10	12.2954	-0.248352
		-10	12.3056	-0.19511		-10	12.3056	-0.245773
		-10	12.3158	-0.210289		-10	12.3158	-0.266472
		-10	12.3261	-0.210178		-10	12.3261	-0.297436
		-10	12.3363	-0.2145		-10	12.3363	-0.299679
		-10	12.3466	-0.2197		-10	12.3466	-0.30022
		-10	12.3568	-0.202953		-10	12.3568	-0.292576
		-10	12.367	-0.197311		-10	12.367	-0.300732
		-10	12.3773	-0.183811		-10	12.3773	-0.308384
		-10	12.3875	-0.166313		-10	12.3875	-0.324764
		-10	12.3978	-0.157665		-10	12.3978	-0.348354
		-10	12.408	-0.162552		-10	12.408	-0.350029
		-10	12.4182	-0.165035		-10	12.4182	-0.349808
		-10	12.4285	-0.18586		-10	12.4285	-0.358444
		-10	12.4387	-0.210732		-10	12.4387	-0.378613
		-10	12.449	-0.22863		-10	12.449	-0.368881
		-10	12.4592	-0.249905		-10	12.4592	-0.351604
		-10	12.4694	-0.256802		-10	12.4694	-0.329472
		-10	12.4797	-0.222546		-10	12.4797	-0.315315
		-10	12.4899	-0.212833		-10	12.4899	-0.303642
		-10	12.5002	-0.209991		-10	12.5002	-0.29454
		-10	12.5104	-0.187218		-10	12.5104	-0.288448
		-10	12.5206	-0.177402		-10	12.5206	-0.295719
		-10	12.5309	-0.158352		-10	12.5309	-0.313377
		-10	12.5411	-0.148033		-10	12.5411	-0.315029
		-10	12.5514	-0.1623		-10	12.5514	-0.309326
		-10	12.5616	-0.173046		-10	12.5616	-0.305565
		-10	12.5718	-0.177593		-10	12.5718	-0.300541
		-10	12.5821	-0.177681		-10	12.5821	-0.300182
		-10	12.5923	-0.174614		-10	12.5923	-0.29493
		-10	12.6026	-0.163548		-10	12.6026	-0.292175
		-10	12.6128	-0.150955		-10	12.6128	-0.294056
		-10	12.623	-0.152187		-10	12.623	-0.307652
		-10	12.6333	-0.156277		-10	12.6333	-0.334446
		-10	12.6435	-0.146339		-10	12.6435	-0.359364
		-10	12.6538	-0.145794		-10	12.6538	-0.362492
		-10	12.664	-0.157131		-10	12.664	-0.341957
		-10	12.6742	-0.158325		-10	12.6742	-0.323307
		-10	12.6845	-0.164253		-10	12.6845	-0.311401
		-10	12.6947	-0.173218		-10	12.6947	-0.30521
		-10	12.705	-0.168453		-10	12.705	-0.30946
		-10	12.7152	-0.168377		-10	12.7152	-0.321579
		-10	12.7254	-0.183937		-10	12.7254	-0.314518
		-10	12.7357	-0.190247		-10	12.7357	-0.303623
		-10	12.7459	-0.198006		-10	12.7459	-0.274048
		-10	12.7562	-0.212852		-10	12.7562	-0.242542
		-10	12.7664	-0.215462		-10	12.7664	-0.242115
		-10	12.7766	-0.204735		-10	12.7766	-0.224682
		-10	12.7869	-0.211575		-10	12.7869	-0.232853
		-10	12.7971	-0.207966		-10	12.7971	-0.245399
		-10	12.8074	-0.208519		-10	12.8074	-0.233952
		-10	12.8176	-0.220463		-10	12.8176	-0.234428
		-10	12.8278	-0.232853		-10	12.8278	-0.228374
		-10	12.8381	-0.245659		-10	12.8381	-0.239414
		-10	12.8483	-0.243355		-10	12.8483	-0.243031
		-10	12.8586	-0.231613		-10	12.8586	-0.235779
		-10	12.8688	-0.228397		-10	12.8688	-0.229366
		-10	12.879	-0.237804		-10	12.879	-0.230274
		-10	12.8893	-0.243263		-10	12.8893	-0.210873
		-10	12.8995	-0.231354		-10	12.8995	-0.201839
		-10	12.9098	-0.224312		-10	12.9098	-0.187119
		-10	12.92	-0.238186		-10	12.92	-0.174217
		-10	12.9302	-0.252476		-10	12.9302	-0.161526
		-10	12.9405	-0.260941		-10	12.9405	-0.157593
		-10	12.9507	-0.266132		-10	12.9507	-0.155098
		-10	12.961	-0.241039		-10	12.961	-0.172138
		-10	12.9712	-0.223461		-10	12.9712	-0.186829
		-10	12.9814	-0.25288		-10	12.9814	-0.192879
		-10	12.9917	-0.260208		-10	12.9917	-0.19841
		-10	13.0019	-0.260902		-10	13.0019	-0.19854
		-10	13.0122	-0.247005		-10	13.0122	-0.184921
		-10	13.0224	-0.240639		-10	13.0224	-0.182205
		-10	13.0326	-0.246376		-10	13.0326	-0.189812
		-10	13.0429	-0.237999		-10	13.0429	-0.184231
		-10	13.0531	-0.237358		-10	13.0531	-0.162708
		-10	13.0634	-0.244457		-10	13.0634	-0.149372
		-10	13.0736	-0.251709		-10	13.0736	-0.157646
		-10	13.0838	-0.246323		-10	13.0838	-0.158016
		-10	13.0941	-0.242363		-10	13.0941	-0.15765
		-10	13.1043	-0.234581		-10	13.1043	-0.142643
		-10	13.1146	-0.239803		-10	13.1146	-0.14698
		-10	13.1248	-0.239658		-10	13.1248	-0.148998
		-10	13.135	-0.230606		-10	13.135	-0.151802
		-10	13.1453	-0.244724		-10	13.1453	-0.146191
		-10	13.1555	-0.252716		-10	13.1555	-0.138672
		-10	13.1658	-0.256863		-10	13.1658	-0.110722
		-10	13.176	-0.257954		-10	13.176	-0.104057
		-10	13.1862	-0.264		-10	13.1862	-0.102375
		-10	13.1965	-0.256142		-10	13.1965	-0.0980339
		-10	13.2067	-0.23996		-10	13.2067	-0.105873
		-10	13.217	-0.229916		-10	13.217	-0.13221
		-10	13.2272	-0.244095		-10	13.2272	-0.152874
		-10	13.2374	-0.272617		-10	13.2374	-0.150002
		-10	13.2477	-0.29034		-10	13.2477	-0.123829
		-10	13.2579	-0.305641		-10	13.2579	-0.116386
		-10	13.2682	-0.288193		-10	13.2682	-0.110889
		-10	13.2784	-0.287926		-10	13.2784	-0.110622
		-10	13.2886	-0.299644		-10	13.2886	-0.109234
		-10	13.2989	-0.324585		-10	13.2989	-0.103848
		-10	13.3091	-0.343704		-10	13.3091	-0.0821075
		-10	13.3194	-0.352402		-10	13.3194	-0.0553932
		-10	13.3296	-0.339745		-10	13.3296	-0.0578194
		-10	13.3398	-0.341896		-10	13.3398	-0.0543556
		-10	13.3501	-0.343788		-10	13.3501	-0.0630569
		-10	13.3603	-0.340618		-10	13.3603	-0.0680084
		-10	13.3706	-0.332897		-10	13.3706	-0.0814934
		-10	13.3808	-0.328094		-10	13.3808	-0.0963058
		-10	13.391	-0.317886		-10	13.391	-0.112854
		-10	13.4013	-0.324375		-10	13.4013	-0.119678
		-10	13.4115	-0.352936		-10	13.4115	-0.115597
		-10	13.4218	-0.376358		-10	13.4218	-0.102211
		-10	13.432	-0.38768		-10	13.432	-0.0962448
		-10	13.4422	-0.392952		-10	13.4422	-0.0966721
		-10	13.4525	-0.369404		-10	13.4525	-0.0785065
		-10	13.4627	-0.339165		-10	13.4627	-0.0590553
		-10	13.473	-0.346123		-10	13.473	-0.0470238
		-10	13.4832	-0.351494		-10	13.4832	-0.0239792
		-10	13.4934	-0.362892		-10	13.4934	-0.0232582
		-10	13.5037	-0.381557		-10	13.5037	-0.0185127
		-10	13.5139	-0.387848		-10	13.5139	-0.0170631
		-10	13.5242	-0.362419		-10	13.5242	-0.0199203
		-10	13.5344	-0.342548		-10	13.5344	-0.022995
		-10	13.5446	-0.335075		-10	13.5446	-0.0229645
		-10	13.5549	-0.340233		-10	13.5549	-0.0394859
		-10	13.5651	-0.33638		-10	13.5651	-0.0397873
		-10	13.5754	-0.300861		-10	13.5754	-0.0652618
		-10	13.5856	-0.270664		-10	13.5856	-0.0930748
		-10	13.5958	-0.284756		-10	13.5958	-0.102684
		-10	13.6061	-0.306274		-10	13.6061	-0.0922699
		-10	13.6163	-0.307705		-10	13.6163	-0.0857925
		-10	13.6266	-0.322353		-10	13.6266	-0.0627556
		-10	13.6368	-0.331394		-10	13.6368	-0.0496979
		-10	13.647	-0.340355		-10	13.647	-0.0417671
		-10	13.6573	-0.359615		-10	13.6573	-0.0483017
		-10	13.6675	-0.367001		-10	13.6675	-0.047966
		-10	13.6778	-0.367882		-10	13.6778	-0.0372963
		-10	13.688	-0.345432		-10	13.688	-0.039444
		-10	13.6982	-0.329735		-10	13.6982	-0.0512962
		-10	13.7085	-0.341457		-10	13.7085	-0.0667229
		-10	13.7187	-0.317879		-10	13.7187	-0.0657272
		-10	13.729	-0.281193		-10	13.729	-0.0442696
		-10	13.7392	-0.251743		-10	13.7392	-0.0400925
		-10	13.7494	-0.25312		-10	13.7494	-0.0470352
		-10	13.7597	-0.253975		-10	13.7597	-0.0512695
		-10	13.7699	-0.275845		-10	13.7699	-0.0567513
		-10	13.7802	-0.297981		-10	13.7802	-0.0520439
		-10	13.7904	-0.30402		-10	13.7904	-0.0469017
		-10	13.8006	-0.304199		-10	13.8006	-0.0453415
		-10	13.8109	-0.310696		-10	13.8109	-0.0382767
		-10	13.8211	-0.318489		-10	13.8211	-0.0327873
		-10	13.8314	-0.320332		-10	13.8314	-0.0450096
		-10	13.8416	-0.309856		-10	13.8416	-0.0546379
		-10	13.8518	-0.280098		-10	13.8518	-0.0474586
		-10	13.8621	-0.253155		-10	13.8621	-0.0622711
		-10	13.8723	-0.257622		-10	13.8723	-0.0949097
		-10	13.8826	-0.287285		-10	13.8826	-0.115623
		-10	13.8928	-0.293041		-10	13.8928	-0.118931
		-10	13.903	-0.286064		-10	13.903	-0.128899
		-10	13.9133	-0.28582		-10	13.9133	-0.127285
		-10	13.9235	-0.264542		-10	13.9235	-0.124096
		-10	13.9338	-0.264675		-10	13.9338	-0.137527
		-10	13.944	-0.267414		-10	13.944	-0.149048
		-10	13.9542	-0.27322		-10	13.9542	-0.153103
		-10	13.9645	-0.282536		-10	13.9645	-0.129559
		-10	13.9747	-0.276409		-10	13.9747	-0.110901
		-10	13.985	-0.287582		-10	13.985	-0.105232
		-10	13.9952	-0.296703		-10	13.9952	-0.105888
		-10	14.0054	-0.298843		-10	14.0054	-0.0873909
		-10	14.0157	-0.277756		-10	14.0157	-0.0840912
		-10	14.0259	-0.265793		-10	14.0259	-0.0845757
		-10	14.0362	-0.281425		-10	14.0362	-0.0876312
		-10	14.0464	-0.293728		-10	14.0464	-0.104378
		-10	14.0566	-0.302998		-10	14.0566	-0.115585
		-10	14.0669	-0.297642		-10	14.0669	-0.113892
		-10	14.0771	-0.296726		-10	14.0771	-0.102791
		-10	14.0874	-0.299164		-10	14.0874	-0.0881119
		-10	14.0976	-0.305378		-10	14.0976	-0.073082
		-10	14.1078	-0.31348		-10	14.1078	-0.0639763
		-10	14.1181	-0.300571		-10	14.1181	-0.0582542
		-10	14.1283	-0.300491		-10	14.1283	-0.0599174
		-10	14.1386	-0.296322		-10	14.1386	-0.0524483
		-10	14.1488	-0.28957		-10	14.1488	-0.0644569
		-10	14.159	-0.297062		-10	14.159	-0.0619125
		-10	14.1693	-0.291618		-10	14.1693	-0.0561752
		-10	14.1795	-0.29092		-10	14.1795	-0.0621719
		-10	14.1898	-0.282932		-10	14.1898	-0.0953636
		-10	14.2	-0.274998		-10	14.2	-0.0887642
		-10	14.2102	-0.263592		-10	14.2102	-0.0820503
		-10	14.2205	-0.254387		-10	14.2205	-0.0848007
		-10	14.2307	-0.272324		-10	14.2307	-0.07267
		-10	14.241	-0.282925		-10	14.241	-0.0614281
		-10	14.2512	-0.302277		-10	14.2512	-0.0434113
		-10	14.2614	-0.300659		-10	14.2614	-0.0420151
		-10	14.2717	-0.30761		-10	14.2717	-0.0443687
		-10	14.2819	-0.284878		-10	14.2819	-0.0428581
		-10	14.2922	-0.25666		-10	14.2922	-0.0488434
		-10	14.3024	-0.253738		-10	14.3024	-0.0558434
		-10	14.3126	-0.261848		-10	14.3126	-0.0495415
		-10	14.3229	-0.261913		-10	14.3229	-0.0181541
		-10	14.3331	-0.282001		-10	14.3331	-0.00960541
		-10	14.3434	-0.287361		-10	14.3434	-0.0388184
		-10	14.3536	-0.288841		-10	14.3536	-0.0613136
		-10	14.3638	-0.307884		-10	14.3638	-0.08815
		-10	14.3741	-0.317585		-10	14.3741	-0.10791
		-10	14.3843	-0.322712		-10	14.3843	-0.112953
		-10	14.3946	-0.311253		-10	14.3946	-0.104469
		-10	14.4048	-0.319023		-10	14.4048	-0.0896759
		-10	14.415	-0.317154		-10	14.415	-0.0808449
		-10	14.4253	-0.305176		-10	14.4253	-0.0892181
		-10	14.4355	-0.307285		-10	14.4355	-0.116741
		-10	14.4458	-0.320026		-10	14.4458	-0.12038
		-10	14.456	-0.324688		-10	14.456	-0.117428
		-10	14.4662	-0.323578		-10	14.4662	-0.121693
		-10	14.4765	-0.321182		-10	14.4765	-0.123203
		-10	14.4867	-0.325405		-10	14.4867	-0.119041
		-10	14.497	-0.322598		-10	14.497	-0.134899
		-10	14.5072	-0.327126		-10	14.5072	-0.142387
		-10	14.5174	-0.355305		-10	14.5174	-0.149456
		-10	14.5277	-0.368515		-10	14.5277	-0.135494
		-10	14.5379	-0.351692		-10	14.5379	-0.129463
		-10	14.5482	-0.339504		-10	14.5482	-0.139305
		-10	14.5584	-0.314968		-10	14.5584	-0.140789
		-10	14.5686	-0.309395		-10	14.5686	-0.138046
		-10	14.5789	-0.317074		-10	14.5789	-0.13839
		-10	14.5891	-0.299911		-10	14.5891	-0.140583
		-10	14.5994	-0.303745		-10	14.5994	-0.132603
		-10	14.6096	-0.30114		-10	14.6096	-0.136562
		-10	14.6198	-0.300011		-10	14.6198	-0.129539
		-10	14.6301	-0.302105		-10	14.6301	-0.116055
		-10	14.6403	-0.308716		-10	14.6403	-0.104145
		-10	14.6506	-0.31588		-10	14.6506	-0.0958061
		-10	14.6608	-0.346287		-10	14.6608	-0.0978279
		-10	14.671	-0.355572		-10	14.671	-0.102024
		-10	14.6813	-0.360947		-10	14.6813	-0.112549
		-10	14.6915	-0.352737		-10	14.6915	-0.138233
		-10	14.7018	-0.352104		-10	14.7018	-0.168274
		-10	14.712	-0.350693		-10	14.712	-0.202675
		-10	14.7222	-0.34074		-10	14.7222	-0.228863
		-10	14.7325	-0.328842		-10	14.7325	-0.232388
		-10	14.7427	-0.314777		-10	14.7427	-0.238853
		-10	14.753	-0.325844		-10	14.753	-0.235874
		-10	14.7632	-0.341026		-10	14.7632	-0.218315
		-10	14.7734	-0.363712		-10	14.7734	-0.201275
		-10	14.7837	-0.370136		-10	14.7837	-0.189098
		-10	14.7939	-0.376251		-10	14.7939	-0.17424
		-10	14.8042	-0.357559		-10	14.8042	-0.169178
		-10	14.8144	-0.359478		-10	14.8144	-0.170818
		-10	14.8246	-0.362137		-10	14.8246	-0.211605
		-10	14.8349	-0.341843		-10	14.8349	-0.238182
		-10	14.8451	-0.336716		-10	14.8451	-0.2342
		-10	14.8554	-0.329651		-10	14.8554	-0.217628
		-10	14.8656	-0.353966		-10	14.8656	-0.193886
		-10	14.8758	-0.369972		-10	14.8758	-0.173618
		-10	14.8861	-0.377289		-10	14.8861	-0.176086
		-10	14.8963	-0.372692		-10	14.8963	-0.19648
		-10	14.9066	-0.366207		-10	14.9066	-0.209854
		-10	14.9168	-0.36512		-10	14.9168	-0.210522
		-10	14.927	-0.373146		-10	14.927	-0.212147
		-10	14.9373	-0.38715		-10	14.9373	-0.201157
		-10	14.9475	-0.400242		-10	14.9475	-0.202637
		-10	14.9578	-0.408043		-10	14.9578	-0.216316
		-10	14.968	-0.409641		-10	14.968	-0.200253
		-10	14.9782	-0.387142		-10	14.9782	-0.179409
		-10	14.9885	-0.336834		-10	14.9885	-0.174911
		-10	14.9987	-0.316662		-10	14.9987	-0.184685
		0	3.00768	-0.00102997		0	3.00768	-0.0838852
		0	3.01792	-0.00044632		0	3.01792	-0.0800667
		0	3.02816	0.00310516		0	3.02816	-0.0695992
		0	3.0384	0.011158		0	3.0384	-0.0706177
		0	3.04864	0.0179291		0	3.04864	-0.0700417
		0	3.05888	0.00772858		0	3.05888	-0.0689964
		0	3.06912	0.0145874		0	3.06912	-0.0648384
		0	3.07936	0.0313797		0	3.07936	-0.0469856
		0	3.0896	0.024395		0	3.0896	-0.0351295
		0	3.09984	0.0309753		0	3.09984	-0.017704
		0	3.11008	0.0563698		0	3.11008	-0.0176125
		0	3.12032	0.0768776		0	3.12032	-0.0046196
		0	3.13056	0.0811119		0	3.13056	-0.0133705
		0	3.1408	0.0917664		0	3.1408	0.00301743
		0	3.15104	0.0892029		0	3.15104	0.0155754
		0	3.16128	0.0985832		0	3.16128	0.0231171
		0	3.17152	0.0951271		0	3.17152	0.042305
		0	3.18176	0.0930214		0	3.18176	0.056797
		0	3.192	0.0975876		0	3.192	0.058918
		0	3.20224	0.0875587		0	3.20224	0.0510902
		0	3.21248	0.0655289		0	3.21248	0.0561905
		0	3.22272	0.0397606		0	3.22272	0.0563583
		0	3.23296	0.0113716		0	3.23296	0.0451241
		0	3.2432	-0.00440598		0	3.2432	0.0394974
		0	3.25344	-0.00582886		0	3.25344	0.0325089
		0	3.26368	0.0108757		0	3.26368	0.0347176
		0	3.27392	0.0284348		0	3.27392	0.0349464
		0	3.28416	0.0365524		0	3.28416	0.0294647
		0	3.2944	0.0462799		0	3.2944	0.00795746
		0	3.30464	0.0663872		0	3.30464	-0.00926208
		0	3.31488	0.0766602		0	3.31488	-0.0193329
		0	3.32512	0.0800056		0	3.32512	-0.00182724
		0	3.33536	0.0725479		0	3.33536	0.00182724
		0	3.3456	0.0710716		0	3.3456	0.0140038
		0	3.35584	0.0604935		0	3.35584	0.0129051
		0	3.36608	0.0714798		0	3.36608	0.0253487
		0	3.37632	0.0770073		0	3.37632	0.0332794
		0	3.38656	0.0685272		0	3.38656	0.027607
		0	3.3968	0.0730438		0	3.3968	0.0158157
		0	3.40704	0.0696335		0	3.40704	0.0163765
		0	3.41728	0.0578041		0	3.41728	0.000881195
		0	3.42752	0.0523224		0	3.42752	-0.0140114
		0	3.43776	0.0560493		0	3.43776	-0.0217209
		0	3.448	0.0494347		0	3.448	-0.0189247
		0	3.45824	0.0514679		0	3.45824	-0.0046463
		0	3.46848	0.0608215		0	3.46848	0.000999451
		0	3.47872	0.0678978		0	3.47872	0.00124741
		0	3.48896	0.0786438		0	3.48896	0.0378418
		0	3.4992	0.0743179		0	3.4992	0.0752068
		0	3.50944	0.0730133		0	3.50944	0.0849266
		0	3.51968	0.0495491		0	3.51968	0.0775108
		0	3.52992	0.0545425		0	3.52992	0.0743599
		0	3.54016	0.0668716		0	3.54016	0.0601273
		0	3.5504	0.071022		0	3.5504	0.0401077
		0	3.56064	0.0751648		0	3.56064	0.0352325
		0	3.57088	0.0986214		0	3.57088	0.0365143
		0	3.58112	0.116531		0	3.58112	0.0370293
		0	3.59136	0.123749		0	3.59136	0.0548019
		0	3.6016	0.106155		0	3.6016	0.0343475
		0	3.61184	0.100937		0	3.61184	0.00868988
		0	3.62208	0.0881729		0	3.62208	0.0120316
		0	3.63232	0.0756798		0	3.63232	0.037796
		0	3.64256	0.0799866		0	3.64256	0.0545654
		0	3.6528	0.0719414		0	3.6528	0.0628204
		0	3.66304	0.0677986		0	3.66304	0.0743256
		0	3.67328	0.074543		0	3.67328	0.0698357
		0	3.68352	0.091301		0	3.68352	0.0600662
		0	3.69376	0.0942879		0	3.69376	0.0416756
		0	3.704	0.0882339		0	3.704	0.0410118
		0	3.71424	0.0686798		0	3.71424	0.0278778
		0	3.72448	0.039917		0	3.72448	0.00825882
		0	3.73472	0.0383492		0	3.73472	-0.00165939
		0	3.74496	0.0297623		0	3.74496	0.0100441
		0	3.7552	0.0340118		0	3.7552	0.0165367
		0	3.76544	0.0456009		0	3.76544	0.0321198
		0	3.77568	0.0470695		0	3.77568	0.0248032
		0	3.78592	0.0540924		0	3.78592	0.0337906
		0	3.79616	0.0651894		0	3.79616	0.0413475
		0	3.8064	0.0793724		0	3.8064	0.0546684
		0	3.81664	0.0928802		0	3.81664	0.0766411
		0	3.82688	0.0708084		0	3.82688	0.0661774
		0	3.83712	0.0434418		0	3.83712	0.0679893
		0	3.84736	0.0210381		0	3.84736	0.0617104
		0	3.8576	0.00804901		0	3.8576	0.0616646
		0	3.86784	0.0107574		0	3.86784	0.0525627
		0	3.87808	0.0227013		0	3.87808	0.0606079
		0	3.88832	0.0632401		0	3.88832	0.0677605
		0	3.89856	0.0877876		0	3.89856	0.0668983
		0	3.9088	0.0913773		0	3.9088	0.0719795
		0	3.91904	0.0863724		0	3.91904	0.0944633
		0	3.92928	0.0678596		0	3.92928	0.10989
		0	3.93952	0.0522308		0	3.93952	0.102833
		0	3.94976	0.0298805		0	3.94976	0.10305
		0	3.96	0.0117073		0	3.96	0.120903
		0	3.97024	0.0103683		0	3.97024	0.126778
		0	3.98048	0.0283966		0	3.98048	0.128181
		0	3.99072	0.0443726		0	3.99072	0.116604
		0	4.00096	0.060173		0	4.00096	0.105381
		0	4.0112	0.0617523		0	4.0112	0.107925
		0	4.02144	0.0542336		0	4.02144	0.11108
		0	4.03168	0.0811272		0	4.03168	0.0941925
		0	4.04192	0.0988045		0	4.04192	0.0936127
		0	4.05216	0.107464		0	4.05216	0.103165
		0	4.0624	0.108528		0	4.0624	0.113342
		0	4.07264	0.0892525		0	4.07264	0.104626
		0	4.08288	0.0628319		0	4.08288	0.0905914
		0	4.09312	0.0680084		0	4.09312	0.0569916
		0	4.10336	0.0708961		0	4.10336	0.0418777
		0	4.1136	0.0544434		0	4.1136	0.0271988
		0	4.12384	0.0594139		0	4.12384	0.00905991
		0	4.13408	0.0587769		0	4.13408	0.00864029
		0	4.14432	0.0650787		0	4.14432	0.0142097
		0	4.15456	0.0642776		0	4.15456	0.0298843
		0	4.1648	0.0520897		0	4.1648	0.0212784
		0	4.17504	0.0715752		0	4.17504	0.0294418
		0	4.18528	0.11298		0	4.18528	0.0429306
		0	4.19552	0.119587		0	4.19552	0.0418434
		0	4.20576	0.116409		0	4.20576	0.0501556
		0	4.216	0.119621		0	4.216	0.0602417
		0	4.22624	0.0902023		0	4.22624	0.0818291
		0	4.23648	0.0630798		0	4.23648	0.0816574
		0	4.24672	0.0659676		0	4.24672	0.0895615
		0	4.25696	0.0870094		0	4.25696	0.0892296
		0	4.2672	0.11348		0	4.2672	0.0841484
		0	4.27744	0.0879784		0	4.27744	0.0789719
		0	4.28768	0.0824242		0	4.28768	0.0685196
		0	4.29792	0.0806847		0	4.29792	0.0582848
		0	4.30816	0.0925598		0	4.30816	0.0853958
		0	4.3184	0.0863953		0	4.3184	0.0849419
		0	4.32864	0.0898933		0	4.32864	0.100704
		0	4.33888	0.0988579		0	4.33888	0.113827
		0	4.34912	0.0934143		0	4.34912	0.11763
		0	4.35936	0.0913391		0	4.35936	0.113708
		0	4.3696	0.094101		0	4.3696	0.103226
		0	4.37984	0.0840874		0	4.37984	0.100391
		0	4.39008	0.0845146		0	4.39008	0.100586
		0	4.40032	0.0829735		0	4.40032	0.106815
		0	4.41056	0.0636444		0	4.41056	0.0895653
		0	4.4208	0.0700722		0	4.4208	0.0932732
		0	4.43104	0.0869446		0	4.43104	0.0678787
		0	4.44128	0.090271		0	4.44128	0.0880394
		0	4.45152	0.081543		0	4.45152	0.109398
		0	4.46176	0.0913849		0	4.46176	0.110336
		0	4.472	0.0910721		0	4.472	0.101395
		0	4.48224	0.0977974		0	4.48224	0.105312
		0	4.49248	0.091629		0	4.49248	0.107555
		0	4.50272	0.0773277		0	4.50272	0.11095
		0	4.51296	0.0818558		0	4.51296	0.119865
		0	4.5232	0.0934944		0	4.5232	0.120213
		0	4.53344	0.112087		0	4.53344	0.131065
		0	4.54368	0.118511		0	4.54368	0.125366
		0	4.55392	0.0988541		0	4.55392	0.121651
		0	4.56416	0.0805588		0	4.56416	0.128384
		0	4.5744	0.0904884		0	4.5744	0.114277
		0	4.58464	0.104084		0	4.58464	0.101978
		0	4.59488	0.11668		0	4.59488	0.104713
		0	4.60512	0.0930367		0	4.60512	0.103954
		0	4.61536	0.0516853		0	4.61536	0.107361
		0	4.6256	0.0374947		0	4.6256	0.11684
		0	4.63584	0.071064		0	4.63584	0.1199
		0	4.64608	0.080658		0	4.64608	0.0966797
		0	4.65632	0.0721397		0	4.65632	0.0821953
		0	4.66656	0.0604134		0	4.66656	0.0676689
		0	4.6768	0.0289078		0	4.6768	0.0600052
		0	4.68704	0.0173912		0	4.68704	0.0544662
		0	4.69728	0.0319557		0	4.69728	0.0542641
		0	4.70752	0.0541191		0	4.70752	0.0399208
		0	4.71776	0.0788422		0	4.71776	0.0283165
		0	4.728	0.102287		0	4.728	0.0273209
		0	4.73824	0.0942421		0	4.73824	0.0256119
		0	4.74848	0.0727577		0	4.74848	0.0264053
		0	4.75872	0.0715752		0	4.75872	0.021843
		0	4.76896	0.0677834		0	4.76896	0.0165482
		0	4.7792	0.0725403		0	4.7792	-0.000270844
		0	4.78944	0.0762482		0	4.78944	-0.0051384
		0	4.79968	0.0959244		0	4.79968	-0.0140533
		0	4.80992	0.118366		0	4.80992	-0.0462265
		0	4.82016	0.131874		0	4.82016	-0.0739746
		0	4.8304	0.120518		0	4.8304	-0.105854
		0	4.84064	0.143047		0	4.84064	-0.13073
		0	4.85088	0.146919		0	4.85088	-0.141235
		0	4.86112	0.139572		0	4.86112	-0.143253
		0	4.87136	0.153477		0	4.87136	-0.178703
		0	4.8816	0.16637		0	4.8816	-0.211475
		0	4.89184	0.201202		0	4.89184	-0.251625
		0	4.90208	0.239681		0	4.90208	-0.278648
		0	4.91232	0.257885		0	4.91232	-0.284939
		0	4.92256	0.232895		0	4.92256	-0.281319
		0	4.9328	0.226406		0	4.9328	-0.290897
		0	4.94304	0.246696		0	4.94304	-0.3256
		0	4.95328	0.261337		0	4.95328	-0.361572
		0	4.96352	0.287937		0	4.96352	-0.395008
		0	4.97376	0.32201		0	4.97376	-0.439251
		0	4.984	0.351627		0	4.984	-0.485054
		0	4.99424	0.390373		0	4.99424	-0.508064
		0	5.00448	0.435276		0	5.00448	-0.521679
		0	5.01472	0.469898		0	5.01472	-0.521194
		0	5.02496	0.489002		0	5.02496	-0.55101
		0	5.0352	0.518425		0	5.0352	-0.59713
		0	5.04544	0.542778		0	5.04544	-0.647522
		0	5.05568	0.585884		0	5.05568	-0.691757
		0	5.06592	0.643547		0	5.06592	-0.7411
		0	5.07616	0.696976		0	5.07616	-0.775326
		0	5.0864	0.73711		0	5.0864	-0.829292
		0	5.09664	0.789444		0	5.09664	-0.885193
		0	5.10688	0.858444		0	5.10688	-0.924503
		0	5.11712	0.938202		0	5.11712	-0.982422
		0	5.12736	1.00377		0	5.12736	-1.04852
		0	5.1376	1.07725		0	5.1376	-1.1023
		0	5.14784	1.16684		0	5.14784	-1.1445
		0	5.15808	1.28167		0	5.15808	-1.18393
		0	5.16832	1.36613		0	5.16832	-1.22582
		0	5.17856	1.45783		0	5.17856	-1.27387
		0	5.1888	1.5313		0	5.1888	-1.31259
		0	5.19904	1.64179		0	5.19904	-1.35284
		0	5.20928	1.75035		0	5.20928	-1.40779
		0	5.21952	1.86599		0	5.21952	-1.46363
		0	5.22976	1.99733		0	5.22976	-1.50965
		0	5.24	2.1009		0	5.24	-1.56034
		0	5.25024	2.19641		0	5.25024	-1.60205
		0	5.26048	2.32323		0	5.26048	-1.65944
		0	5.27072	2.4669		0	5.27072	-1.71202
		0	5.28096	2.62974		0	5.28096	-1.78835
		0	5.2912	2.80039		0	5.2912	-1.8568
		0	5.30144	2.94597		0	5.30144	-1.91421
		0	5.31168	3.07331		0	5.31168	-1.95959
		0	5.32192	3.2127		0	5.32192	-2.02217
		0	5.33216	3.3625		0	5.33216	-2.08463
		0	5.3424	3.5272		0	5.3424	-2.13483
		0	5.35264	3.68487		0	5.35264	-2.17173
		0	5.36288	3.83928		0	5.36288	-2.23719
		0	5.37312	4.01814		0	5.37312	-2.30076
		0	5.38336	4.22626		0	5.38336	-2.35088
		0	5.3936	4.45221		0	5.3936	-2.39034
		0	5.40384	4.63727		0	5.40384	-2.42579
		0	5.41408	4.83236		0	5.41408	-2.47723
		0	5.42432	5.02356		0	5.42432	-2.52506
		0	5.43456	5.24727		0	5.43456	-2.57979
		0	5.4448	5.52788		0	5.4448	-2.65216
		0	5.45504	5.83578		0	5.45504	-2.71048
		0	5.46528	6.16278		0	5.46528	-2.75135
		0	5.47552	6.51628		0	5.47552	-2.78056
		0	5.48576	6.96268		0	5.48576	-2.81598
		0	5.496	7.4671		0	5.496	-2.85524
		0	5.50624	8.02383		0	5.50624	-2.88418
		0	5.51648	8.64709		0	5.51648	-2.9311
		0	5.52672	9.37128		0	5.52672	-2.99117
		0	5.53696	10.1873		0	5.53696	-3.04248
		0	5.5472	11.1175		0	5.5472	-3.0983
		0	5.55744	12.1982		0	5.55744	-3.15245
		0	5.56768	13.4057		0	5.56768	-3.19189
		0	5.57792	14.716		0	5.57792	-3.22955
		0	5.58816	16.1401		0	5.58816	-3.28764
		0	5.5984	17.6528		0	5.5984	-3.33417
		0	5.60864	19.2889		0	5.60864	-3.378
		0	5.61888	21.0055		0	5.61888	-3.42509
		0	5.62912	22.7927		0	5.62912	-3.46678
		0	5.63936	24.6414		0	5.63936	-3.50284
		0	5.6496	26.5535		0	5.6496	-3.53877
		0	5.65984	28.4707		0	5.65984	-3.57083
		0	5.67008	30.3454		0	5.67008	-3.60558
		0	5.68032	32.1345		0	5.68032	-3.66227
		0	5.69056	33.8408		0	5.69056	-3.69709
		0	5.7008	35.4735		0	5.7008	-3.72951
		0	5.71104	36.9874		0	5.71104	-3.7593
		0	5.72128	38.3699		0	5.72128	-3.76862
		0	5.73152	39.6106		0	5.73152	-3.8017
		0	5.74176	40.7041		0	5.74176	-3.84089
		0	5.752	41.6312		0	5.752	-3.88996
		0	5.76224	42.3936		0	5.76224	-3.92163
		0	5.77248	42.9519		0	5.77248	-3.93255
		0	5.78272	43.3501		0	5.78272	-3.94979
		0	5.79296	43.6066		0	5.79296	-3.96427
		0	5.8032	43.6977		0	5.8032	-3.97821
		0	5.81344	43.5897		0	5.81344	-4.01152
		0	5.82368	43.3022		0	5.82368	-4.0577
		0	5.83392	42.8275		0	5.83392	-4.08541
		0	5.84416	42.1915		0	5.84416	-4.11277
		0	5.8544	41.4181		0	5.8544	-4.13442
		0	5.86464	40.5338		0	5.86464	-4.13372
		0	5.87488	39.5372		0	5.87488	-4.14376
		0	5.88512	38.4219		0	5.88512	-4.16446
		0	5.89536	37.2516		0	5.89536	-4.16523
		0	5.9056	36.0053		0	5.9056	-4.15959
		0	5.91584	34.7467		0	5.91584	-4.16496
		0	5.92608	33.4592		0	5.92608	-4.18444
		0	5.93632	32.157		0	5.93632	-4.21192
		0	5.94656	30.8597		0	5.94656	-4.25862
		0	5.9568	29.5841		0	5.9568	-4.31354
		0	5.96704	28.3094		0	5.96704	-4.3645
		0	5.97728	27.0406		0	5.97728	-4.36948
		0	5.98752	25.801		0	5.98752	-4.34104
		0	5.99776	24.5914		0	5.99776	-4.30579
		0	6.008	23.4176		0	6.008	-4.29655
		0	6.01824	22.2635		0	6.01824	-4.28325
		0	6.02848	21.1359		0	6.02848	-4.276
		0	6.03872	20.0588		0	6.03872	-4.2895
		0	6.04896	18.9902		0	6.04896	-4.29501
		0	6.0592	17.9113		0	6.0592	-4.34106
		0	6.06944	16.8653		0	6.06944	-4.3721
		0	6.07968	15.8698		0	6.07968	-4.40372
		0	6.08992	14.917		0	6.08992	-4.41397
		0	6.10016	14.0187		0	6.10016	-4.4236
		0	6.1104	13.1589		0	6.1104	-4.43141
		0	6.12064	12.3145		0	6.12064	-4.41603
		0	6.13088	11.5012		0	6.13088	-4.41192
		0	6.14112	10.7657		0	6.14112	-4.40678
		0	6.15136	10.0854		0	6.15136	-4.38789
		0	6.1616	9.4355		0	6.1616	-4.38103
		0	6.17184	8.84184		0	6.17184	-4.39068
		0	6.18208	8.27026		0	6.18208	-4.39595
		0	6.19232	7.73937		0	6.19232	-4.4069
		0	6.20256	7.25851		0	6.20256	-4.42151
		0	6.2128	6.79974		0	6.2128	-4.42935
		0	6.22304	6.37007		0	6.22304	-4.40283
		0	6.23328	5.98059		0	6.23328	-4.40762
		0	6.24352	5.6438		0	6.24352	-4.3987
		0	6.25376	5.35009		0	6.25376	-4.40366
		0	6.264	5.10113		0	6.264	-4.4063
		0	6.27424	4.88071		0	6.27424	-4.38645
		0	6.28448	4.67468		0	6.28448	-4.3676
		0	6.29472	4.48581		0	6.29472	-4.36678
		0	6.30496	4.35113		0	6.30496	-4.3701
		0	6.3152	4.22502		0	6.3152	-4.35771
		0	6.32544	4.13798		0	6.32544	-4.35473
		0	6.33568	4.06543		0	6.33568	-4.33871
		0	6.34592	3.97789		0	6.34592	-4.34105
		0	6.35616	3.86746		0	6.35616	-4.35531
		0	6.3664	3.76965		0	6.3664	-4.36187
		0	6.37664	3.72074		0	6.37664	-4.36321
		0	6.38688	3.72601		0	6.38688	-4.34469
		0	6.39712	3.76348		0	6.39712	-4.3409
		0	6.40736	3.78834		0	6.40736	-4.32477
		0	6.4176	3.83392		0	6.4176	-4.31112
		0	6.42784	3.87149		0	6.42784	-4.29721
		0	6.43808	3.91327		0	6.43808	-4.27486
		0	6.44832	3.94334		0	6.44832	-4.25241
		0	6.45856	3.96567		0	6.45856	-4.2337
		0	6.4688	4.00436		0	6.4688	-4.23075
		0	6.47904	4.02513		0	6.47904	-4.22131
		0	6.48928	4.07236		0	6.48928	-4.22569
		0	6.49952	4.12419		0	6.49952	-4.2316
		0	6.50976	4.17402		0	6.50976	-4.22026
		0	6.52	4.21674		0	6.52	-4.19466
		0	6.53024	4.28227		0	6.53024	-4.18335
		0	6.54048	4.37278		0	6.54048	-4.17954
		0	6.55072	4.45572		0	6.55072	-4.20166
		0	6.56096	4.5252		0	6.56096	-4.21061
		0	6.5712	4.60481		0	6.5712	-4.19773
		0	6.58144	4.70317		0	6.58144	-4.1919
		0	6.59168	4.78198		0	6.59168	-4.17859
		0	6.60192	4.83936		0	6.60192	-4.16661
		0	6.61216	4.896		0	6.61216	-4.16033
		0	6.6224	4.96787		0	6.6224	-4.16542
		0	6.63264	5.04771		0	6.63264	-4.17543
		0	6.64288	5.11577		0	6.64288	-4.15664
		0	6.65312	5.16765		0	6.65312	-4.11939
		0	6.66336	5.20566		0	6.66336	-4.08874
		0	6.6736	5.25609		0	6.6736	-4.06056
		0	6.68384	5.30787		0	6.68384	-4.02307
		0	6.69408	5.37243		0	6.69408	-4.00743
		0	6.70432	5.43696		0	6.70432	-3.9982
		0	6.71456	5.50301		0	6.71456	-3.98084
		0	6.7248	5.55751		0	6.7248	-3.9631
		0	6.73504	5.60411		0	6.73504	-3.95225
		0	6.74528	5.64273		0	6.74528	-3.92049
		0	6.75552	5.69448		0	6.75552	-3.90215
		0	6.76576	5.75013		0	6.76576	-3.91916
		0	6.776	5.79302		0	6.776	-3.92981
		0	6.78624	5.82711		0	6.78624	-3.9301
		0	6.79648	5.85927		0	6.79648	-3.91793
		0	6.80672	5.90523		0	6.80672	-3.90631
		0	6.81696	5.94458		0	6.81696	-3.87166
		0	6.8272	5.99063		0	6.8272	-3.84772
		0	6.83744	6.03254		0	6.83744	-3.82953
		0	6.84768	6.05919		0	6.84768	-3.82331
		0	6.85792	6.11438		0	6.85792	-3.79647
		0	6.86816	6.15416		0	6.86816	-3.75969
		0	6.8784	6.16651		0	6.8784	-3.73349
		0	6.88864	6.18905		0	6.88864	-3.72365
		0	6.89888	6.22292		0	6.89888	-3.70274
		0	6.90912	6.25446		0	6.90912	-3.68435
		0	6.91936	6.27559		0	6.91936	-3.66555
		0	6.9296	6.30207		0	6.9296	-3.64777
		0	6.93984	6.35368		0	6.93984	-3.65831
		0	6.95008	6.38635		0	6.95008	-3.66418
		0	6.96032	6.40091		0	6.96032	-3.6758
		0	6.97056	6.39356		0	6.97056	-3.65458
		0	6.9808	6.42023		0	6.9808	-3.61615
		0	6.99104	6.444		0	6.99104	-3.5827
		0	7.00128	6.46204		0	7.00128	-3.5597
		0	7.01152	6.48581		0	7.01152	-3.5545
		0	7.02176	6.51477		0	7.02176	-3.52707
		0	7.032	6.51542		0	7.032	-3.52513
		0	7.04224	6.5254		0	7.04224	-3.50369
		0	7.05248	6.53735		0	7.05248	-3.47096
		0	7.06272	6.549		0	7.06272	-3.45082
		0	7.07296	6.54862		0	7.07296	-3.43425
		0	7.0832	6.53968		0	7.0832	-3.4191
		0	7.09344	6.55458		0	7.09344	-3.39885
		0	7.10368	6.55931		0	7.10368	-3.39574
		0	7.11392	6.56966		0	7.11392	-3.39185
		0	7.12416	6.58008		0	7.12416	-3.38131
		0	7.1344	6.55582		0	7.1344	-3.36022
		0	7.14464	6.51926		0	7.14464	-3.339
		0	7.15488	6.51529		0	7.15488	-3.31841
		0	7.16512	6.51425		0	7.16512	-3.29451
		0	7.17536	6.50142		0	7.17536	-3.26009
		0	7.1856	6.49554		0	7.1856	-3.24419
		0	7.19584	6.48511		0	7.19584	-3.21019
		0	7.20608	6.4751		0	7.20608	-3.19009
		0	7.21632	6.46889		0	7.21632	-3.18432
		0	7.22656	6.47439		0	7.22656	-3.1713
		0	7.2368	6.46423		0	7.2368	-3.156
		0	7.24704	6.46597		0	7.24704	-3.15489
		0	7.25728	6.46737		0	7.25728	-3.13823
		0	7.26752	6.46831		0	7.26752	-3.14465
		0	7.27776	6.46281		0	7.27776	-3.14775
		0	7.288	6.44247		0	7.288	-3.14262
		0	7.29824	6.44744		0	7.29824	-3.12695
		0	7.30848	6.42284		0	7.30848	-3.08108
		0	7.31872	6.39715		0	7.31872	-3.05106
		0	7.32896	6.35399		0	7.32896	-3.03437
		0	7.3392	6.29329		0	7.3392	-3.04046
		0	7.34944	6.24117		0	7.34944	-3.01817
		0	7.35968	6.21286		0	7.35968	-2.973
		0	7.36992	6.20403		0	7.36992	-2.96367
		0	7.38016	6.18591		0	7.38016	-2.95598
		0	7.3904	6.17904		0	7.3904	-2.93478
		0	7.40064	6.1803		0	7.40064	-2.91639
		0	7.41088	6.14923		0	7.41088	-2.91414
		0	7.42112	6.10841		0	7.42112	-2.91771
		0	7.43136	6.0968		0	7.43136	-2.90211
		0	7.4416	6.08089		0	7.4416	-2.88229
		0	7.45184	6.05217		0	7.45184	-2.86145
		0	7.46208	6.0379		0	7.46208	-2.84273
		0	7.47232	6.0096		0	7.47232	-2.8428
		0	7.48256	5.96748		0	7.48256	-2.82423
		0	7.4928	5.9254		0	7.4928	-2.79423
		0	7.50304	5.90564		0	7.50304	-2.76233
		0	7.51328	5.89009		0	7.51328	-2.73787
		0	7.52352	5.87436		0	7.52352	-2.73892
		0	7.53376	5.82299		0	7.53376	-2.73769
		0	7.544	5.79309		0	7.544	-2.74511
		0	7.55424	5.75568		0	7.55424	-2.75997
		0	7.56448	5.7218		0	7.56448	-2.77412
		0	7.57472	5.68515		0	7.57472	-2.77785
		0	7.58496	5.64016		0	7.58496	-2.75375
		0	7.5952	5.60198		0	7.5952	-2.69567
		0	7.60544	5.56613		0	7.60544	-2.64816
		0	7.61568	5.53337		0	7.61568	-2.62648
		0	7.62592	5.52785		0	7.62592	-2.61219
		0	7.63616	5.48621		0	7.63616	-2.59795
		0	7.6464	5.45026		0	7.6464	-2.59333
		0	7.65664	5.41566		0	7.65664	-2.59415
		0	7.66688	5.37239		0	7.66688	-2.60598
		0	7.67712	5.32288		0	7.67712	-2.58763
		0	7.68736	5.28828		0	7.68736	-2.56984
		0	7.6976	5.28063		0	7.6976	-2.57215
		0	7.70784	5.26587		0	7.70784	-2.57323
		0	7.71808	5.22839		0	7.71808	-2.55248
		0	7.72832	5.20617		0	7.72832	-2.53465
		0	7.73856	5.20544		0	7.73856	-2.519
		0	7.7488	5.17878		0	7.7488	-2.48375
		0	7.75904	5.12727		0	7.75904	-2.47705
		0	7.76928	5.09706		0	7.76928	-2.44712
		0	7.77952	5.07473		0	7.77952	-2.42126
		0	7.78976	5.04184		0	7.78976	-2.39881
		0	7.8	5.00833		0	7.8	-2.38116
		0	7.81024	4.97658		0	7.81024	-2.36969
		0	7.82048	4.93843		0	7.82048	-2.38243
		0	7.83072	4.8844		0	7.83072	-2.36275
		0	7.84096	4.85168		0	7.84096	-2.33095
		0	7.8512	4.81188		0	7.8512	-2.3079
		0	7.86144	4.76804		0	7.86144	-2.29599
		0	7.87168	4.74235		0	7.87168	-2.27886
		0	7.88192	4.7208		0	7.88192	-2.26863
		0	7.89216	4.69062		0	7.89216	-2.27464
		0	7.9024	4.63117		0	7.9024	-2.28438
		0	7.91264	4.55252		0	7.91264	-2.2889
		0	7.92288	4.49727		0	7.92288	-2.26127
		0	7.93312	4.45589		0	7.93312	-2.25804
		0	7.94336	4.41072		0	7.94336	-2.25568
		0	7.9536	4.3821		0	7.9536	-2.26892
		0	7.96384	4.35692		0	7.96384	-2.25667
		0	7.97408	4.32381		0	7.97408	-2.22871
		0	7.98432	4.28642		0	7.98432	-2.21635
		0	7.99456	4.23214		0	7.99456	-2.20005
		0	8.0048	4.20213		0	8.0048	-2.19869
		0	8.01504	4.18461		0	8.01504	-2.19209
		0	8.02528	4.17088		0	8.02528	-2.20636
		0	8.03552	4.14951		0	8.03552	-2.19588
		0	8.04576	4.11731		0	8.04576	-2.17031
		0	8.056	4.06153		0	8.056	-2.14669
		0	8.06624	4.03507		0	8.06624	-2.12476
		0	8.07648	4.02712		0	8.07648	-2.09948
		0	8.08672	4.01099		0	8.08672	-2.07872
		0	8.09696	3.98119		0	8.09696	-2.07024
		0	8.1072	3.96009		0	8.1072	-2.05878
		0	8.11744	3.89782		0	8.11744	-2.05935
		0	8.12768	3.85736		0	8.12768	-2.05632
		0	8.13792	3.81136		0	8.13792	-2.03019
		0	8.14816	3.77803		0	8.14816	-2.00097
		0	8.1584	3.76495		0	8.1584	-1.96528
		0	8.16864	3.73603		0	8.16864	-1.94062
		0	8.17888	3.7056		0	8.17888	-1.91282
		0	8.18912	3.65494		0	8.18912	-1.90289
		0	8.19936	3.62383		0	8.19936	-1.89138
		0	8.2096	3.61757		0	8.2096	-1.87307
		0	8.21984	3.61102		0	8.21984	-1.86469
		0	8.23008	3.58585		0	8.23008	-1.87167
		0	8.24032	3.57127		0	8.24032	-1.87885
		0	8.25056	3.54578		0	8.25056	-1.87385
		0	8.2608	3.52355		0	8.2608	-1.85675
		0	8.27104	3.49084		0	8.27104	-1.83844
		0	8.28128	3.45879		0	8.28128	-1.82149
		0	8.29152	3.43916		0	8.29152	-1.80351
		0	8.30176	3.4149		0	8.30176	-1.7966
		0	8.312	3.38306		0	8.312	-1.79754
		0	8.32224	3.33798		0	8.32224	-1.79429
		0	8.33248	3.31494		0	8.33248	-1.80169
		0	8.34272	3.27709		0	8.34272	-1.80529
		0	8.35296	3.26391		0	8.35296	-1.81048
		0	8.3632	3.25346		0	8.3632	-1.78894
		0	8.37344	3.23442		0	8.37344	-1.75935
		0	8.38368	3.20496		0	8.38368	-1.74834
		0	8.39392	3.20512		0	8.39392	-1.73507
		0	8.40416	3.19172		0	8.40416	-1.71989
		0	8.4144	3.17112		0	8.4144	-1.71534
		0	8.42464	3.15887		0	8.42464	-1.72459
		0	8.43488	3.1396		0	8.43488	-1.7075
		0	8.44512	3.15313		0	8.44512	-1.67164
		0	8.45536	3.13798		0	8.45536	-1.65943
		0	8.4656	3.12333		0	8.4656	-1.65799
		0	8.47584	3.0785		0	8.47584	-1.66008
		0	8.48608	3.04833		0	8.48608	-1.64181
		0	8.49632	3.02658		0	8.49632	-1.59739
		0	8.50656	3.00632		0	8.50656	-1.57947
		0	8.5168	2.98108		0	8.5168	-1.54116
		0	8.52704	2.94683		0	8.52704	-1.51028
		0	8.53728	2.92842		0	8.53728	-1.51708
		0	8.54752	2.90533		0	8.54752	-1.53556
		0	8.55776	2.88373		0	8.55776	-1.54039
		0	8.568	2.86251		0	8.568	-1.54211
		0	8.57824	2.84552		0	8.57824	-1.51819
		0	8.58848	2.85147		0	8.58848	-1.51085
		0	8.59872	2.84227		0	8.59872	-1.50169
		0	8.60896	2.81678		0	8.60896	-1.50433
		0	8.6192	2.78165		0	8.6192	-1.48164
		0	8.62944	2.7682		0	8.62944	-1.4503
		0	8.63968	2.74454		0	8.63968	-1.41539
		0	8.64992	2.71852		0	8.64992	-1.37788
		0	8.66016	2.68391		0	8.66016	-1.36009
		0	8.6704	2.6454		0	8.6704	-1.37171
		0	8.68064	2.64113		0	8.68064	-1.38491
		0	8.69088	2.65234		0	8.69088	-1.37108
		0	8.70112	2.63172		0	8.70112	-1.3642
		0	8.71136	2.59583		0	8.71136	-1.34997
		0	8.7216	2.55429		0	8.7216	-1.3497
		0	8.73184	2.51096		0	8.73184	-1.38747
		0	8.74208	2.46239		0	8.74208	-1.39684
		0	8.75232	2.42705		0	8.75232	-1.38292
		0	8.76256	2.40925		0	8.76256	-1.34031
		0	8.7728	2.40398		0	8.7728	-1.30488
		0	8.78304	2.42079		0	8.78304	-1.27909
		0	8.79328	2.40057		0	8.79328	-1.26992
		0	8.80352	2.35484		0	8.80352	-1.28216
		0	8.81376	2.29716		0	8.81376	-1.2697
		0	8.824	2.25158		0	8.824	-1.25489
		0	8.83424	2.22651		0	8.83424	-1.24409
		0	8.84448	2.22265		0	8.84448	-1.24974
		0	8.85472	2.22767		0	8.85472	-1.24802
		0	8.86496	2.20507		0	8.86496	-1.25403
		0	8.8752	2.1692		0	8.8752	-1.24205
		0	8.88544	2.12969		0	8.88544	-1.22543
		0	8.89568	2.09842		0	8.89568	-1.2146
		0	8.90592	2.09007		0	8.90592	-1.22032
		0	8.91616	2.06724		0	8.91616	-1.21807
		0	8.9264	2.04103		0	8.9264	-1.2156
		0	8.93664	2.02855		0	8.93664	-1.22298
		0	8.94688	2.01421		0	8.94688	-1.21705
		0	8.95712	2.00557		0	8.95712	-1.22275
		0	8.96736	2.00635		0	8.96736	-1.20184
		0	8.9776	1.99199		0	8.9776	-1.17585
		0	8.98784	1.95155		0	8.98784	-1.15958
		0	8.99808	1.91395		0	8.99808	-1.14065
		0	9.00832	1.8998		0	9.00832	-1.12956
		0	9.01856	1.8757		0	9.01856	-1.12535
		0	9.0288	1.83105		0	9.0288	-1.12761
		0	9.03904	1.79367		0	9.03904	-1.14433
		0	9.04928	1.7645		0	9.04928	-1.16351
		0	9.05952	1.70966		0	9.05952	-1.18838
		0	9.06976	1.67365		0	9.06976	-1.18077
		0	9.08	1.65363		0	9.08	-1.18559
		0	9.09024	1.64281		0	9.09024	-1.17972
		0	9.10048	1.64076		0	9.10048	-1.15877
		0	9.11072	1.63275		0	9.11072	-1.13752
		0	9.12096	1.62932		0	9.12096	-1.13542
		0	9.1312	1.62693		0	9.1312	-1.13562
		0	9.14144	1.62819		0	9.14144	-1.11795
		0	9.15168	1.61958		0	9.15168	-1.11843
		0	9.16192	1.60472		0	9.16192	-1.11089
		0	9.17216	1.5688		0	9.17216	-1.10752
		0	9.1824	1.51746		0	9.1824	-1.11411
		0	9.19264	1.48309		0	9.19264	-1.123
		0	9.20288	1.47258		0	9.20288	-1.13207
		0	9.21312	1.46189		0	9.21312	-1.13647
		0	9.22336	1.44334		0	9.22336	-1.15199
		0	9.2336	1.42423		0	9.2336	-1.13999
		0	9.24384	1.41387		0	9.24384	-1.11986
		0	9.25408	1.40468		0	9.25408	-1.11745
		0	9.26432	1.39075		0	9.26432	-1.12564
		0	9.27456	1.34608		0	9.27456	-1.11742
		0	9.2848	1.32102		0	9.2848	-1.10582
		0	9.29504	1.30803		0	9.29504	-1.09707
		0	9.30528	1.31168		0	9.30528	-1.11002
		0	9.31552	1.34031		0	9.31552	-1.1155
		0	9.32576	1.3339		0	9.32576	-1.10766
		0	9.336	1.33626		0	9.336	-1.10036
		0	9.34624	1.33286		0	9.34624	-1.10553
		0	9.35648	1.33036		0	9.35648	-1.10706
		0	9.36672	1.32101		0	9.36672	-1.08751
		0	9.37696	1.29829		0	9.37696	-1.08101
		0	9.3872	1.27893		0	9.3872	-1.06581
		0	9.39744	1.26218		0	9.39744	-1.07073
		0	9.40768	1.2373		0	9.40768	-1.05672
		0	9.41792	1.20949		0	9.41792	-1.04149
		0	9.42816	1.17801		0	9.42816	-1.0436
		0	9.4384	1.16065		0	9.4384	-1.03705
		0	9.44864	1.14632		0	9.44864	-1.03638
		0	9.45888	1.13086		0	9.45888	-1.0316
		0	9.46912	1.14259		0	9.46912	-1.01395
		0	9.47936	1.14949		0	9.47936	-1.00588
		0	9.4896	1.16159		0	9.4896	-0.981308
		0	9.49984	1.16186		0	9.49984	-0.967628
		0	9.51008	1.1437		0	9.51008	-0.956429
		0	9.52032	1.12558		0	9.52032	-0.946606
		0	9.53056	1.1109		0	9.53056	-0.946178
		0	9.5408	1.08414		0	9.5408	-0.93853
		0	9.55104	1.04243		0	9.55104	-0.94281
		0	9.56128	1.01532		0	9.56128	-0.948208
		0	9.57152	0.981335		0	9.57152	-0.944717
		0	9.58176	0.962948		0	9.58176	-0.927872
		0	9.592	0.951958		0	9.592	-0.916515
		0	9.60224	0.932289		0	9.60224	-0.913242
		0	9.61248	0.89407		0	9.61248	-0.903683
		0	9.62272	0.907501		0	9.62272	-0.896519
		0	9.63296	0.918739		0	9.63296	-0.882397
		0	9.6432	0.887074		0	9.6432	-0.888115
		0	9.65344	0.846634		0	9.65344	-0.904827
		0	9.66368	0.815769		0	9.66368	-0.905899
		0	9.67392	0.820538		0	9.67392	-0.908779
		0	9.68416	0.82703		0	9.68416	-0.90099
		0	9.6944	0.844437		0	9.6944	-0.90847
		0	9.70464	0.829296		0	9.70464	-0.90855
		0	9.71488	0.82098		0	9.71488	-0.903664
		0	9.72512	0.820892		0	9.72512	-0.886868
		0	9.73536	0.801701		0	9.73536	-0.870667
		0	9.7456	0.770271		0	9.7456	-0.868534
		0	9.75584	0.752316		0	9.75584	-0.849617
		0	9.76608	0.731289		0	9.76608	-0.83543
		0	9.77632	0.715485		0	9.77632	-0.801071
		0	9.78656	0.676636		0	9.78656	-0.780388
		0	9.7968	0.656559		0	9.7968	-0.773342
		0	9.80704	0.652878		0	9.80704	-0.75713
		0	9.81728	0.653664		0	9.81728	-0.760738
		0	9.82752	0.652893		0	9.82752	-0.762589
		0	9.83776	0.640476		0	9.83776	-0.763348
		0	9.848	0.63586		0	9.848	-0.771778
		0	9.85824	0.614235		0	9.85824	-0.769897
		0	9.86848	0.602242		0	9.86848	-0.770962
		0	9.87872	0.577606		0	9.87872	-0.780846
		0	9.88896	0.557865		0	9.88896	-0.7868
		0	9.8992	0.535915		0	9.8992	-0.770016
		0	9.90944	0.529335		0	9.90944	-0.747158
		0	9.91968	0.520168		0	9.91968	-0.733231
		0	9.92992	0.528316		0	9.92992	-0.708469
		0	9.94016	0.505772		0	9.94016	-0.7048
		0	9.9504	0.469128		0	9.9504	-0.687069
		0	9.96064	0.439541		0	9.96064	-0.675991
		0	9.97088	0.406986		0	9.97088	-0.664165
		0	9.98112	0.384018		0	9.98112	-0.666553
		0	9.99136	0.409847		0	9.99136	-0.648705
		0	10.0016	0.427849		0	10.0016	-0.629139
		0	10.0118	0.426022		0	10.0118	-0.609859
		0	10.0221	0.411556		0	10.0221	-0.583015
		0	10.0323	0.385235		0	10.0323	-0.568119
		0	10.0426	0.369278		0	10.0426	-0.555538
		0	10.0528	0.361008		0	10.0528	-0.53529
		0	10.063	0.34856		0	10.063	-0.528305
		0	10.0733	0.316216		0	10.0733	-0.531849
		0	10.0835	0.29768		0	10.0835	-0.550087
		0	10.0938	0.306164		0	10.0938	-0.569695
		0	10.104	0.325344		0	10.104	-0.565166
		0	10.1142	0.332348		0	10.1142	-0.554405
		0	10.1245	0.319378		0	10.1245	-0.544205
		0	10.1347	0.308075		0	10.1347	-0.507835
		0	10.145	0.298573		0	10.145	-0.502522
		0	10.1552	0.27858		0	10.1552	-0.497784
		0	10.1654	0.247616		0	10.1654	-0.49836
		0	10.1757	0.22694		0	10.1757	-0.485325
		0	10.1859	0.200966		0	10.1859	-0.470482
		0	10.1962	0.179218		0	10.1962	-0.466255
		0	10.2064	0.159317		0	10.2064	-0.471752
		0	10.2166	0.160767		0	10.2166	-0.497807
		0	10.2269	0.15012		0	10.2269	-0.522652
		0	10.2371	0.132782		0	10.2371	-0.511215
		0	10.2474	0.12711		0	10.2474	-0.489395
		0	10.2576	0.136589		0	10.2576	-0.492863
		0	10.2678	0.13858		0	10.2678	-0.491493
		0	10.2781	0.122425		0	10.2781	-0.47509
		0	10.2883	0.107533		0	10.2883	-0.456188
		0	10.2986	0.10355		0	10.2986	-0.449661
		0	10.3088	0.115963		0	10.3088	-0.450211
		0	10.319	0.122669		0	10.319	-0.46611
		0	10.3293	0.131443		0	10.3293	-0.461006
		0	10.3395	0.127617		0	10.3395	-0.469059
		0	10.3498	0.113056		0	10.3498	-0.480614
		0	10.36	0.097477		0	10.36	-0.473824
		0	10.3702	0.105576		0	10.3702	-0.463707
		0	10.3805	0.105526		0	10.3805	-0.452255
		0	10.3907	0.108181		0	10.3907	-0.443245
		0	10.401	0.108109		0	10.401	-0.447941
		0	10.4112	0.0965538		0	10.4112	-0.441273
		0	10.4214	0.0899162		0	10.4214	-0.441845
		0	10.4317	0.0768433		0	10.4317	-0.440388
		0	10.4419	0.064743		0	10.4419	-0.430214
		0	10.4522	0.0635376		0	10.4522	-0.429638
		0	10.4624	0.0653992		0	10.4624	-0.427959
		0	10.4726	0.0643196		0	10.4726	-0.428738
		0	10.4829	0.0598526		0	10.4829	-0.429985
		0	10.4931	0.0599174		0	10.4931	-0.43084
		0	10.5034	0.0431023		0	10.5034	-0.429028
		0	10.5136	0.036274		0	10.5136	-0.448437
		0	10.5238	0.0456009		0	10.5238	-0.451408
		0	10.5341	0.0374451		0	10.5341	-0.446705
		0	10.5443	0.0124626		0	10.5443	-0.426964
		0	10.5546	-0.00353622		0	10.5546	-0.393749
		0	10.5648	0.000514984		0	10.5648	-0.383415
		0	10.575	-0.0160179		0	10.575	-0.386818
		0	10.5853	-0.0354767		0	10.5853	-0.398815
		0	10.5955	-0.0444946		0	10.5955	-0.398621
		0	10.6058	-0.0584641		0	10.6058	-0.415176
		0	10.616	-0.0714378		0	10.616	-0.410297
		0	10.6262	-0.0827217		0	10.6262	-0.422691
		0	10.6365	-0.0701981		0	10.6365	-0.44677
		0	10.6467	-0.0528526		0	10.6467	-0.451469
		0	10.657	-0.0503082		0	10.657	-0.452827
		0	10.6672	-0.0653763		0	10.6672	-0.441471
		0	10.6774	-0.0898895		0	10.6774	-0.433346
		0	10.6877	-0.0940018		0	10.6877	-0.419559
		0	10.6979	-0.0985069		0	10.6979	-0.412853
		0	10.7082	-0.13253		0	10.7082	-0.404659
		0	10.7184	-0.158966		0	10.7184	-0.384563
		0	10.7286	-0.167866		0	10.7286	-0.379684
		0	10.7389	-0.158569		0	10.7389	-0.378105
		0	10.7491	-0.161877		0	10.7491	-0.37899
		0	10.7594	-0.18996		0	10.7594	-0.365662
		0	10.7696	-0.211018		0	10.7696	-0.353382
		0	10.7798	-0.227531		0	10.7798	-0.346821
		0	10.7901	-0.227543		0	10.7901	-0.345455
		0	10.8003	-0.250916		0	10.8003	-0.343403
		0	10.8106	-0.263611		0	10.8106	-0.365952
		0	10.8208	-0.254185		0	10.8208	-0.358082
		0	10.831	-0.229679		0	10.831	-0.34227
		0	10.8413	-0.241837		0	10.8413	-0.357323
		0	10.8515	-0.239635		0	10.8515	-0.363113
		0	10.8618	-0.223076		0	10.8618	-0.374123
		0	10.872	-0.215153		0	10.872	-0.366283
		0	10.8822	-0.22401		0	10.8822	-0.374294
		0	10.8925	-0.248478		0	10.8925	-0.394241
		0	10.9027	-0.247696		0	10.9027	-0.397884
		0	10.913	-0.262878		0	10.913	-0.377502
		0	10.9232	-0.261345		0	10.9232	-0.375149
		0	10.9334	-0.259224		0	10.9334	-0.377739
		0	10.9437	-0.2435		0	10.9437	-0.390682
		0	10.9539	-0.256741		0	10.9539	-0.413872
		0	10.9642	-0.262943		0	10.9642	-0.424767
		0	10.9744	-0.290543		0	10.9744	-0.443832
		0	10.9846	-0.320114		0	10.9846	-0.444046
		0	10.9949	-0.352509		0	10.9949	-0.445213
		0	11.0051	-0.364574		0	11.0051	-0.434158
		0	11.0154	-0.3643		0	11.0154	-0.42881
		0	11.0256	-0.37014		0	11.0256	-0.445805
		0	11.0358	-0.377068		0	11.0358	-0.441471
		0	11.0461	-0.400162		0	11.0461	-0.430313
		0	11.0563	-0.40332		0	11.0563	-0.416138
		0	11.0666	-0.426327		0	11.0666	-0.40012
		0	11.0768	-0.433468		0	11.0768	-0.381119
		0	11.087	-0.406342		0	11.087	-0.374199
		0	11.0973	-0.390278		0	11.0973	-0.355587
		0	11.1075	-0.380806		0	11.1075	-0.373764
		0	11.1178	-0.395584		0	11.1178	-0.375614
		0	11.128	-0.408379		0	11.128	-0.35305
		0	11.1382	-0.40377		0	11.1382	-0.335518
		0	11.1485	-0.408897		0	11.1485	-0.322483
		0	11.1587	-0.429253		0	11.1587	-0.329674
		0	11.169	-0.415863		0	11.169	-0.33075
		0	11.1792	-0.397839		0	11.1792	-0.329868
		0	11.1894	-0.381683		0	11.1894	-0.335644
		0	11.1997	-0.379936		0	11.1997	-0.334602
		0	11.2099	-0.387676		0	11.2099	-0.322762
		0	11.2202	-0.387257		0	11.2202	-0.333748
		0	11.2304	-0.397923		0	11.2304	-0.336098
		0	11.2406	-0.38829		0	11.2406	-0.337852
		0	11.2509	-0.38092		0	11.2509	-0.351032
		0	11.2611	-0.391251		0	11.2611	-0.370659
		0	11.2714	-0.398647		0	11.2714	-0.396
		0	11.2816	-0.416313		0	11.2816	-0.408699
		0	11.2918	-0.420544		0	11.2918	-0.391933
		0	11.3021	-0.421925		0	11.3021	-0.368946
		0	11.3123	-0.410503		0	11.3123	-0.359592
		0	11.3226	-0.425728		0	11.3226	-0.353554
		0	11.3328	-0.430313		0	11.3328	-0.351704
		0	11.343	-0.428745		0	11.343	-0.341228
		0	11.3533	-0.429718		0	11.3533	-0.335484
		0	11.3635	-0.431339		0	11.3635	-0.34343
		0	11.3738	-0.433674		0	11.3738	-0.33622
		0	11.384	-0.441429		0	11.384	-0.355881
		0	11.3942	-0.447845		0	11.3942	-0.355717
		0	11.4045	-0.45676		0	11.4045	-0.329613
		0	11.4147	-0.462936		0	11.4147	-0.307549
		0	11.425	-0.458984		0	11.425	-0.287663
		0	11.4352	-0.439457		0	11.4352	-0.275524
		0	11.4454	-0.450527		0	11.4454	-0.265503
		0	11.4557	-0.451511		0	11.4557	-0.262653
[truncated: 9,722 more rows]

## Sheet: panel F
	Ipsi				Contra				Ipsi			Contra
	Sound intensity (dB)	Time (ms)	Vm rel (mV)		Sound intensity (dB)	Time (ms)	Vm rel (mV)		Sound intensity (dB SPL)	Latency (ms)		Sound intensity (dB SPL)	Latency (ms)
	28	3.50944	0.200821		28	3.50944	0.145687		28	5.38336		28	5.38336
	28	3.51968	0.222588		28	3.51968	0.141357		30	5.25024		30	5.5472
	28	3.52992	0.209999		28	3.52992	0.0915413		32	5.17856		32	5.0864
	28	3.54016	0.18586		28	3.54016	0.165356		34	5.21952		34	5.17856
	28	3.5504	0.16589		28	3.5504	0.206547		36	5.24		36	5.22976
	28	3.56064	0.175354		28	3.56064	0.214428		38	5.1888		38	5.1888
	28	3.57088	0.182972		28	3.57088	0.21571		40	5.16832		40	5.07616
	28	3.58112	0.215092		28	3.58112	0.225132		42	5.1376		42	5.09664
	28	3.59136	0.184086		28	3.59136	0.24387		44	5.1376		44	4.99424
	28	3.6016	0.184174		28	3.6016	0.250156		46	5.14784		46	4.97376
	28	3.61184	0.170097		28	3.61184	0.22258		48	5.12736		48	4.94304
	28	3.62208	0.119148		28	3.62208	0.212013		50	5.05568		50	4.92256
	28	3.63232	0.113663		28	3.63232	0.235798		52	5.06592		52	4.89184
	28	3.64256	0.0985107		28	3.64256	0.1978		54	4.96352		54	4.84064
	28	3.6528	0.09552		28	3.6528	0.211857		56	4.91232		56	4.78944
	28	3.66304	0.140469		28	3.66304	0.291542		58	4.91232		58	4.74848
	28	3.67328	0.162521		28	3.67328	0.271343		60	4.89184		60	4.74848
	28	3.68352	0.191917		28	3.68352	0.179073
	28	3.69376	0.200203		28	3.69376	0.184093
	28	3.704	0.184437		28	3.704	0.259045
	28	3.71424	0.262787		28	3.71424	0.165306
	28	3.72448	0.20573		28	3.72448	0.191807
	28	3.73472	0.181381		28	3.73472	0.209888
	28	3.74496	0.165756		28	3.74496	0.238976
	28	3.7552	0.196949		28	3.7552	0.18314
	28	3.76544	0.215832		28	3.76544	0.228161
	28	3.77568	0.245781		28	3.77568	0.235504
	28	3.78592	0.191948		28	3.78592	0.26598
	28	3.79616	0.198891		28	3.79616	0.259296
	28	3.8064	0.165977		28	3.8064	0.258087
	28	3.81664	0.176811		28	3.81664	0.265942
	28	3.82688	0.168724		28	3.82688	0.268833
	28	3.83712	0.150978		28	3.83712	0.21291
	28	3.84736	0.190857		28	3.84736	0.204712
	28	3.8576	0.176804		28	3.8576	0.26041
	28	3.86784	0.163006		28	3.86784	0.245403
	28	3.87808	0.15683		28	3.87808	0.191067
	28	3.88832	0.158394		28	3.88832	0.150658
	28	3.89856	0.128716		28	3.89856	0.15855
	28	3.9088	0.0756989		28	3.9088	0.171684
	28	3.91904	0.0811157		28	3.91904	0.210499
	28	3.92928	0.0811958		28	3.92928	0.288197
	28	3.93952	0.100113		28	3.93952	0.299236
	28	3.94976	0.115074		28	3.94976	0.330109
	28	3.96	0.146835		28	3.96	0.328907
	28	3.97024	0.16177		28	3.97024	0.26828
	28	3.98048	0.104919		28	3.98048	0.293407
	28	3.99072	0.162651		28	3.99072	0.318089
	28	4.00096	0.240055		28	4.00096	0.34676
	28	4.0112	0.179939		28	4.0112	0.38876
	28	4.02144	0.151367		28	4.02144	0.387836
	28	4.03168	0.117416		28	4.03168	0.384789
	28	4.04192	0.153183		28	4.04192	0.380207
	28	4.05216	0.139145		28	4.05216	0.387615
	28	4.0624	0.118073		28	4.0624	0.401562
	28	4.07264	0.073494		28	4.07264	0.358582
	28	4.08288	0.0461082		28	4.08288	0.385426
	28	4.09312	0.0909271		28	4.09312	0.36657
	28	4.10336	0.122742		28	4.10336	0.376205
	28	4.1136	0.208618		28	4.1136	0.428661
	28	4.12384	0.182827		28	4.12384	0.392532
	28	4.13408	0.172558		28	4.13408	0.407337
	28	4.14432	0.0389099		28	4.14432	0.403988
	28	4.15456	0.0288696		28	4.15456	0.399315
	28	4.1648	0.0791931		28	4.1648	0.423313
	28	4.17504	0.106522		28	4.17504	0.398647
	28	4.18528	0.101349		28	4.18528	0.313076
	28	4.19552	0.136383		28	4.19552	0.249596
	28	4.20576	0.155525		28	4.20576	0.300926
	28	4.216	0.100319		28	4.216	0.272923
	28	4.22624	0.1213		28	4.22624	0.235012
	28	4.23648	0.11747		28	4.23648	0.264011
	28	4.24672	0.150494		28	4.24672	0.269352
	28	4.25696	0.10722		28	4.25696	0.251438
	28	4.2672	0.109711		28	4.2672	0.273182
	28	4.27744	0.0981598		28	4.27744	0.293945
	28	4.28768	0.107338		28	4.28768	0.25383
	28	4.29792	0.120148		28	4.29792	0.251484
	28	4.30816	0.0983582		28	4.30816	0.243717
	28	4.3184	0.0642166		28	4.3184	0.23135
	28	4.32864	0.00266266		28	4.32864	0.265812
	28	4.33888	0.0357513		28	4.33888	0.260735
	28	4.34912	0.0499115		28	4.34912	0.228489
	28	4.35936	0.0249939		28	4.35936	0.27446
	28	4.3696	0.0579987		28	4.3696	0.240608
	28	4.37984	0.0350952		28	4.37984	0.212955
	28	4.39008	0.015625		28	4.39008	0.168797
	28	4.40032	-0.00603485		28	4.40032	0.156418
	28	4.41056	0.0293655		28	4.41056	0.177616
	28	4.4208	0.0272903		28	4.4208	0.222557
	28	4.43104	0.0569458		28	4.43104	0.200779
	28	4.44128	0.092701		28	4.44128	0.167213
	28	4.45152	0.0815735		28	4.45152	0.0948524
	28	4.46176	0.096405		28	4.46176	0.107746
	28	4.472	0.0654984		28	4.472	0.131683
	28	4.48224	0.0386505		28	4.48224	0.153194
	28	4.49248	-0.00782394		28	4.49248	0.186481
	28	4.50272	0.0307312		28	4.50272	0.190235
	28	4.51296	0.00108719		28	4.51296	0.208668
	28	4.5232	0.0204582		28	4.5232	0.130024
	28	4.53344	0.0271149		28	4.53344	0.126945
	28	4.54368	0.0533752		28	4.54368	0.133121
	28	4.55392	0.0543747		28	4.55392	0.139835
	28	4.56416	-0.0210838		28	4.56416	0.149105
	28	4.5744	-0.0622902		28	4.5744	0.15506
	28	4.58464	-0.00222015		28	4.58464	0.186985
	28	4.59488	-0.0230103		28	4.59488	0.168888
	28	4.60512	0.00777435		28	4.60512	0.174412
	28	4.61536	-0.038475		28	4.61536	0.230904
	28	4.6256	-0.0207748		28	4.6256	0.209499
	28	4.63584	-0.0531082		28	4.63584	0.201332
	28	4.64608	-0.0297546		28	4.64608	0.153049
	28	4.65632	-0.0096283		28	4.65632	0.185394
	28	4.66656	0.0349083		28	4.66656	0.151325
	28	4.6768	-0.00180817		28	4.6768	0.130844
	28	4.68704	0.0331573		28	4.68704	0.0963936
	28	4.69728	-0.0238991		28	4.69728	0.101086
	28	4.70752	-0.0507965		28	4.70752	0.0841103
	28	4.71776	-0.0554962		28	4.71776	0.119621
	28	4.728	-0.0771179		28	4.728	0.157932
	28	4.73824	-0.0865021		28	4.73824	0.135178
	28	4.74848	-0.0760345		28	4.74848	0.144627
	28	4.75872	-0.0864639		28	4.75872	0.0953903
	28	4.76896	-0.0434608		28	4.76896	0.106167
	28	4.7792	-0.00710678		28	4.7792	0.0827065
	28	4.78944	-0.0787659		28	4.78944	0.0503235
	28	4.79968	-0.0639496		28	4.79968	0.0743446
	28	4.80992	-0.0428162		28	4.80992	0.0408516
	28	4.82016	-0.088562		28	4.82016	0.0459557
	28	4.8304	-0.0318756		28	4.8304	-0.00408173
	28	4.84064	-0.0531731		28	4.84064	0.0582733
	28	4.85088	-0.0887718		28	4.85088	0.0304565
	28	4.86112	-0.078373		28	4.86112	0.0436516
	28	4.87136	-0.0879288		28	4.87136	0.0375824
	28	4.8816	-0.103188		28	4.8816	8.39233e-05
	28	4.89184	-0.107956		28	4.89184	0.00931168
	28	4.90208	-0.0417747		28	4.90208	-0.00487137
	28	4.91232	-0.0625038		28	4.91232	-0.0297394
	28	4.92256	-0.113426		28	4.92256	-0.0904427
	28	4.9328	-0.0724297		28	4.9328	-0.0771751
	28	4.94304	-0.049511		28	4.94304	-0.0725403
	28	4.95328	-0.0290794		28	4.95328	-0.0188599
	28	4.96352	-0.000656128		28	4.96352	-0.0776138
	28	4.97376	-0.0402298		28	4.97376	-0.138355
	28	4.984	-0.0186653		28	4.984	-0.132168
	28	4.99424	-0.0101929		28	4.99424	-0.150043
	28	5.00448	-0.00880432		28	5.00448	-0.172287
	28	5.01472	0.0414658		28	5.01472	-0.183929
	28	5.02496	0.0208282		28	5.02496	-0.15263
	28	5.0352	0.0195541		28	5.0352	-0.226521
	28	5.04544	-0.00720596		28	5.04544	-0.252003
	28	5.05568	0.0381088		28	5.05568	-0.304951
	28	5.06592	0.0666084		28	5.06592	-0.315273
	28	5.07616	0.0723152		28	5.07616	-0.337212
	28	5.0864	0.0954666		28	5.0864	-0.345703
	28	5.09664	0.0410461		28	5.09664	-0.426235
	28	5.10688	0.0526199		28	5.10688	-0.447758
	28	5.11712	0.0475769		28	5.11712	-0.497379
	28	5.12736	0.0682144		28	5.12736	-0.542889
	28	5.1376	0.0760231		28	5.1376	-0.567986
	28	5.14784	0.115547		28	5.14784	-0.635731
	28	5.15808	0.167122		28	5.15808	-0.686127
	28	5.16832	0.204994		28	5.16832	-0.755108
	28	5.17856	0.184235		28	5.17856	-0.760765
	28	5.1888	0.245419		28	5.1888	-0.787777
	28	5.19904	0.317497		28	5.19904	-0.854969
	28	5.20928	0.395958		28	5.20928	-0.879307
	28	5.21952	0.423725		28	5.21952	-0.815552
	28	5.22976	0.436451		28	5.22976	-0.7915
	28	5.24	0.450928		28	5.24	-0.77734
	28	5.25024	0.510715		28	5.25024	-0.878986
	28	5.26048	0.48333		28	5.26048	-0.981564
	28	5.27072	0.526588		28	5.27072	-0.998844
	28	5.28096	0.622959		28	5.28096	-0.947929
	28	5.2912	0.672104		28	5.2912	-0.956436
	28	5.30144	0.695057		28	5.30144	-0.961399
	28	5.31168	0.766666		28	5.31168	-0.963459
	28	5.32192	0.83416		28	5.32192	-0.951527
	28	5.33216	0.893505		28	5.33216	-1.01054
	28	5.3424	0.924782		28	5.3424	-1.0831
	28	5.35264	0.948105		28	5.35264	-1.10398
	28	5.36288	1.04112		28	5.36288	-1.13192
	28	5.37312	1.10751		28	5.37312	-1.18081
	28	5.38336	1.22093		28	5.38336	-1.22676
	28	5.3936	1.32498		28	5.3936	-1.224
	28	5.40384	1.39768		28	5.40384	-1.18574
	28	5.41408	1.3838		28	5.41408	-1.21146
	28	5.42432	1.45338		28	5.42432	-1.26211
	28	5.43456	1.51227		28	5.43456	-1.31865
	28	5.4448	1.57973		28	5.4448	-1.36438
	28	5.45504	1.65856		28	5.45504	-1.35275
	28	5.46528	1.66922		28	5.46528	-1.34391
	28	5.47552	1.61158		28	5.47552	-1.3702
	28	5.48576	1.69081		28	5.48576	-1.34224
	28	5.496	1.75922		28	5.496	-1.37223
	28	5.50624	1.73063		28	5.50624	-1.34407
	28	5.51648	1.82706		28	5.51648	-1.36908
	28	5.52672	1.89705		28	5.52672	-1.41698
	28	5.53696	1.91357		28	5.53696	-1.40591
	28	5.5472	2.03176		28	5.5472	-1.35013
	28	5.55744	2.14823		28	5.55744	-1.29078
	28	5.56768	2.11407		28	5.56768	-1.30645
	28	5.57792	2.07988		28	5.57792	-1.33548
	28	5.58816	2.09332		28	5.58816	-1.3232
	28	5.5984	2.05887		28	5.5984	-1.39074
	28	5.60864	2.07019		28	5.60864	-1.44137
	28	5.61888	2.03907		28	5.61888	-1.38642
	28	5.62912	2.06001		28	5.62912	-1.40965
	28	5.63936	2.04251		28	5.63936	-1.42662
	28	5.6496	2.03192		28	5.6496	-1.4734
	28	5.65984	2.09774		28	5.65984	-1.52544
	28	5.67008	2.096		28	5.67008	-1.57038
	28	5.68032	2.11601		28	5.68032	-1.5456
	28	5.69056	2.10659		28	5.69056	-1.4919
	28	5.7008	2.1354		28	5.7008	-1.53443
	28	5.71104	2.17126		28	5.71104	-1.59365
	28	5.72128	2.18058		28	5.72128	-1.59876
	28	5.73152	2.11397		28	5.73152	-1.49694
	28	5.74176	2.12037		28	5.74176	-1.51114
	28	5.752	2.22351		28	5.752	-1.51963
	28	5.76224	2.27162		28	5.76224	-1.47643
	28	5.77248	2.2326		28	5.77248	-1.47068
	28	5.78272	2.19368		28	5.78272	-1.53255
	28	5.79296	2.13448		28	5.79296	-1.52441
	28	5.8032	2.19451		28	5.8032	-1.53517
	28	5.81344	2.2417		28	5.81344	-1.55623
	28	5.82368	2.23536		28	5.82368	-1.62466
	28	5.83392	2.15293		28	5.83392	-1.63855
	28	5.84416	2.086		28	5.84416	-1.63369
	28	5.8544	2.17683		28	5.8544	-1.63229
	28	5.86464	2.27666		28	5.86464	-1.65358
	28	5.87488	2.27229		28	5.87488	-1.78447
	28	5.88512	2.20502		28	5.88512	-1.75774
	28	5.89536	2.12568		28	5.89536	-1.72673
	28	5.9056	2.13586		28	5.9056	-1.71785
	28	5.91584	2.15731		28	5.91584	-1.70714
	28	5.92608	2.21172		28	5.92608	-1.7885
	28	5.93632	2.10976		28	5.93632	-1.79654
	28	5.94656	2.16745		28	5.94656	-1.7804
	28	5.9568	2.1861		28	5.9568	-1.72407
	28	5.96704	2.19059		28	5.96704	-1.72671
	28	5.97728	2.11717		28	5.97728	-1.80188
	28	5.98752	2.09328		28	5.98752	-1.77291
	28	5.99776	2.13591		28	5.99776	-1.77033
	30	3.50944	-0.293945		30	3.50944	-0.0721588
	30	3.51968	-0.338058		30	3.51968	-0.0256577
	30	3.52992	-0.326729		30	3.52992	-0.0509415
	30	3.54016	-0.31675		30	3.54016	-0.0293694
	30	3.5504	-0.376373		30	3.5504	-0.0460815
	30	3.56064	-0.407433		30	3.56064	-0.107666
	30	3.57088	-0.390892		30	3.57088	-0.0381317
	30	3.58112	-0.327309		30	3.58112	-0.0633087
	30	3.59136	-0.348682		30	3.59136	-0.0593262
	30	3.6016	-0.375229		30	3.6016	-0.103512
	30	3.61184	-0.379421		30	3.61184	-0.0709686
	30	3.62208	-0.334175		30	3.62208	-0.0835571
	30	3.63232	-0.359222		30	3.63232	-0.108376
	30	3.64256	-0.370247		30	3.64256	-0.0961075
	30	3.6528	-0.428032		30	3.6528	-0.112839
	30	3.66304	-0.444378		30	3.66304	-0.0926437
	30	3.67328	-0.428799		30	3.67328	-0.0877495
	30	3.68352	-0.419701		30	3.68352	-0.101498
	30	3.69376	-0.410511		30	3.69376	-0.0989227
	30	3.704	-0.418518		30	3.704	-0.129631
	30	3.71424	-0.429443		30	3.71424	-0.137108
	30	3.72448	-0.434414		30	3.72448	-0.134018
	30	3.73472	-0.459435		30	3.73472	-0.13237
	30	3.74496	-0.411064		30	3.74496	-0.178482
	30	3.7552	-0.43116		30	3.7552	-0.179104
	30	3.76544	-0.378906		30	3.76544	-0.153717
	30	3.77568	-0.357689		30	3.77568	-0.127579
	30	3.78592	-0.380707		30	3.78592	-0.112915
	30	3.79616	-0.448189		30	3.79616	-0.145065
	30	3.8064	-0.460045		30	3.8064	-0.153515
	30	3.81664	-0.426361		30	3.81664	-0.132084
	30	3.82688	-0.452545		30	3.82688	-0.155102
	30	3.83712	-0.493843		30	3.83712	-0.130531
	30	3.84736	-0.473064		30	3.84736	-0.131626
	30	3.8576	-0.43502		30	3.8576	-0.069397
	30	3.86784	-0.436478		30	3.86784	-0.120193
	30	3.87808	-0.422722		30	3.87808	-0.0793304
	30	3.88832	-0.457718		30	3.88832	-0.0696106
	30	3.89856	-0.502335		30	3.89856	-0.0271225
	30	3.9088	-0.490032		30	3.9088	0.0899429
	30	3.91904	-0.497646		30	3.91904	0.0310402
	30	3.92928	-0.587807		30	3.92928	-0.00740433
	30	3.93952	-0.576733		30	3.93952	0.0163994
	30	3.94976	-0.615711		30	3.94976	0.132294
	30	3.96	-0.609566		30	3.96	0.170654
	30	3.97024	-0.60479		30	3.97024	0.18161
	30	3.98048	-0.630032		30	3.98048	0.20089
	30	3.99072	-0.595242		30	3.99072	0.233093
	30	4.00096	-0.597263		30	4.00096	0.267956
	30	4.0112	-0.575829		30	4.0112	0.280869
	30	4.02144	-0.555965		30	4.02144	0.315781
	30	4.03168	-0.543354		30	4.03168	0.287601
	30	4.04192	-0.544815		30	4.04192	0.334499
	30	4.05216	-0.556263		30	4.05216	0.345222
	30	4.0624	-0.523224		30	4.0624	0.387363
	30	4.07264	-0.494244		30	4.07264	0.434593
	30	4.08288	-0.47839		30	4.08288	0.497059
	30	4.09312	-0.492657		30	4.09312	0.459129
	30	4.10336	-0.492672		30	4.10336	0.441078
	30	4.1136	-0.478027		30	4.1136	0.4188
	30	4.12384	-0.420685		30	4.12384	0.386738
	30	4.13408	-0.423679		30	4.13408	0.421795
	30	4.14432	-0.4352		30	4.14432	0.422707
	30	4.15456	-0.461929		30	4.15456	0.453888
	30	4.1648	-0.512329		30	4.1648	0.408142
	30	4.17504	-0.468662		30	4.17504	0.379166
	30	4.18528	-0.459061		30	4.18528	0.344048
	30	4.19552	-0.414516		30	4.19552	0.384567
	30	4.20576	-0.353207		30	4.20576	0.381149
	30	4.216	-0.3741		30	4.216	0.357979
	30	4.22624	-0.414635		30	4.22624	0.355885
	30	4.23648	-0.375366		30	4.23648	0.373165
	30	4.24672	-0.306953		30	4.24672	0.312271
	30	4.25696	-0.271729		30	4.25696	0.2827
	30	4.2672	-0.294716		30	4.2672	0.298206
	30	4.27744	-0.27277		30	4.27744	0.216057
	30	4.28768	-0.192268		30	4.28768	0.186157
	30	4.29792	-0.129898		30	4.29792	0.229134
	30	4.30816	-0.132172		30	4.30816	0.228493
	30	4.3184	-0.106129		30	4.3184	0.25024
	30	4.32864	-0.120537		30	4.32864	0.236969
	30	4.33888	-0.231384		30	4.33888	0.215523
	30	4.34912	-0.264061		30	4.34912	0.17366
	30	4.35936	-0.278679		30	4.35936	0.133381
	30	4.3696	-0.180969		30	4.3696	0.177261
	30	4.37984	-0.12801		30	4.37984	0.192913
	30	4.39008	-0.10276		30	4.39008	0.174896
	30	4.40032	-0.0739594		30	4.40032	0.133858
	30	4.41056	-0.0308685		30	4.41056	0.12825
	30	4.4208	-0.0319443		30	4.4208	0.0510712
	30	4.43104	-0.0599174		30	4.43104	0.0432091
	30	4.44128	-0.0531693		30	4.44128	0.140335
	30	4.45152	-0.0727501		30	4.45152	0.13298
	30	4.46176	-0.0171776		30	4.46176	0.107994
	30	4.472	-0.0248947		30	4.472	0.112118
	30	4.48224	0.010437		30	4.48224	0.0955582
	30	4.49248	0.016098		30	4.49248	0.071434
	30	4.50272	0.0136223		30	4.50272	0.103882
	30	4.51296	-0.0250359		30	4.51296	0.0851593
	30	4.5232	-0.00731659		30	4.5232	0.110706
	30	4.53344	0.0281906		30	4.53344	0.0756302
	30	4.54368	-0.0158806		30	4.54368	0.0490112
	30	4.55392	-0.0498199		30	4.55392	-0.0163498
	30	4.56416	-0.0125046		30	4.56416	-0.0609283
	30	4.5744	-0.00898743		30	4.5744	-0.0652237
	30	4.58464	-0.0197678		30	4.58464	0.0011673
	30	4.59488	-0.0280037		30	4.59488	0.0355988
	30	4.60512	-0.0198097		30	4.60512	0.0727272
	30	4.61536	-0.0136261		30	4.61536	0.0718918
	30	4.6256	-0.0289001		30	4.6256	0.0356941
	30	4.63584	0.0154533		30	4.63584	0.00334167
	30	4.64608	0.00816345		30	4.64608	-0.015007
	30	4.65632	0.00282288		30	4.65632	0.00488281
	30	4.66656	0.0225067		30	4.66656	0.0270386
	30	4.6768	-0.00430679		30	4.6768	0.0236893
	30	4.68704	-0.0459671		30	4.68704	0.0424805
	30	4.69728	0.0267334		30	4.69728	-0.00971985
	30	4.70752	0.0290184		30	4.70752	-0.0914993
	30	4.71776	0.00907135		30	4.71776	-0.0870857
	30	4.728	-0.0535393		30	4.728	-0.054493
	30	4.73824	-0.0260849		30	4.73824	-0.0352821
	30	4.74848	-0.00549316		30	4.74848	-0.0285568
	30	4.75872	0.0554047		30	4.75872	-0.0284042
	30	4.76896	0.0835724		30	4.76896	-0.0383072
	30	4.7792	0.0520782		30	4.7792	-0.0322647
	30	4.78944	0.0324478		30	4.78944	-0.0413399
	30	4.79968	0.0217743		30	4.79968	-0.000610352
	30	4.80992	0.0112762		30	4.80992	-0.0398636
	30	4.82016	0.0354233		30	4.82016	-0.0463257
	30	4.8304	-0.0096283		30	4.8304	-0.0556679
	30	4.84064	0.00727844		30	4.84064	-0.0703583
	30	4.85088	0.044632		30	4.85088	-0.0425949
	30	4.86112	0.106571		30	4.86112	-0.00725555
	30	4.87136	0.0499573		30	4.87136	0.0158463
	30	4.8816	-0.0262985		30	4.8816	-0.0741882
	30	4.89184	-0.0575562		30	4.89184	-0.0658302
	30	4.90208	0.0285606		30	4.90208	-0.0758133
	30	4.91232	0.0619965		30	4.91232	-0.140312
	30	4.92256	0.0981712		30	4.92256	-0.19043
	30	4.9328	0.0947723		30	4.9328	-0.192829
	30	4.94304	0.092514		30	4.94304	-0.117725
	30	4.95328	0.148026		30	4.95328	-0.0832787
	30	4.96352	0.112007		30	4.96352	-0.0200882
	30	4.97376	0.128075		30	4.97376	0.0482864
	30	4.984	0.151604		30	4.984	0.0425911
	30	4.99424	0.192513		30	4.99424	-0.0322609
	30	5.00448	0.250389		30	5.00448	-0.0930519
	30	5.01472	0.264671		30	5.01472	-0.124252
	30	5.02496	0.332626		30	5.02496	-0.149731
	30	5.0352	0.352608		30	5.0352	-0.200092
	30	5.04544	0.28056		30	5.04544	-0.260208
	30	5.05568	0.296032		30	5.05568	-0.205299
	30	5.06592	0.333275		30	5.06592	-0.174789
	30	5.07616	0.445656		30	5.07616	-0.175331
	30	5.0864	0.435097		30	5.0864	-0.243149
	30	5.09664	0.507244		30	5.09664	-0.321007
	30	5.10688	0.545517		30	5.10688	-0.329224
	30	5.11712	0.544205		30	5.11712	-0.337074
	30	5.12736	0.535698		30	5.12736	-0.307297
	30	5.1376	0.579857		30	5.1376	-0.372837
	30	5.14784	0.685997		30	5.14784	-0.414932
	30	5.15808	0.719086		30	5.15808	-0.439919
	30	5.16832	0.728111		30	5.16832	-0.464622
	30	5.17856	0.775757		30	5.17856	-0.467838
	30	5.1888	0.884933		30	5.1888	-0.56398
	30	5.19904	0.901703		30	5.19904	-0.553192
	30	5.20928	0.903893		30	5.20928	-0.526482
	30	5.21952	1.02955		30	5.21952	-0.529709
	30	5.22976	1.10439		30	5.22976	-0.596718
	30	5.24	1.1841		30	5.24	-0.612419
	30	5.25024	1.28798		30	5.25024	-0.712105
	30	5.26048	1.29787		30	5.26048	-0.69915
	30	5.27072	1.26028		30	5.27072	-0.70446
	30	5.28096	1.32462		30	5.28096	-0.766846
	30	5.2912	1.40735		30	5.2912	-0.754711
	30	5.30144	1.46578		30	5.30144	-0.736435
	30	5.31168	1.58937		30	5.31168	-0.685562
	30	5.32192	1.67997		30	5.32192	-0.674755
	30	5.33216	1.74079		30	5.33216	-0.746021
	30	5.3424	1.74964		30	5.3424	-0.728409
	30	5.35264	1.85123		30	5.35264	-0.738678
	30	5.36288	1.95557		30	5.36288	-0.739052
	30	5.37312	2.1254		30	5.37312	-0.762932
	30	5.38336	2.20192		30	5.38336	-0.821201
	30	5.3936	2.24097		30	5.3936	-0.824585
	30	5.40384	2.26076		30	5.40384	-0.815567
	30	5.41408	2.3321		30	5.41408	-0.826614
	30	5.42432	2.41547		30	5.42432	-0.857361
	30	5.43456	2.47458		30	5.43456	-0.876736
	30	5.4448	2.54005		30	5.4448	-0.899925
	30	5.45504	2.6664		30	5.45504	-0.925446
	30	5.46528	2.66113		30	5.46528	-0.97221
	30	5.47552	2.85051		30	5.47552	-1.03603
	30	5.48576	3.0395		30	5.48576	-1.06913
	30	5.496	3.07825		30	5.496	-1.05032
	30	5.50624	3.07644		30	5.50624	-1.12364
	30	5.51648	3.05064		30	5.51648	-1.13662
	30	5.52672	3.03888		30	5.52672	-1.14083
	30	5.53696	3.13765		30	5.53696	-1.18652
	30	5.5472	3.22535		30	5.5472	-1.26212
	30	5.55744	3.23878		30	5.55744	-1.26308
	30	5.56768	3.29401		30	5.56768	-1.17493
	30	5.57792	3.38039		30	5.57792	-1.19549
	30	5.58816	3.53079		30	5.58816	-1.20842
	30	5.5984	3.58957		30	5.5984	-1.2374
	30	5.60864	3.57064		30	5.60864	-1.22767
	30	5.61888	3.62955		30	5.61888	-1.19709
	30	5.62912	3.71391		30	5.62912	-1.21767
	30	5.63936	3.75514		30	5.63936	-1.2452
	30	5.6496	3.75636		30	5.6496	-1.25465
	30	5.65984	3.76649		30	5.65984	-1.28763
	30	5.67008	3.79488		30	5.67008	-1.33206
	30	5.68032	3.84637		30	5.68032	-1.40032
	30	5.69056	3.85239		30	5.69056	-1.42296
	30	5.7008	3.83464		30	5.7008	-1.43491
	30	5.71104	3.86282		30	5.71104	-1.44444
	30	5.72128	3.87432		30	5.72128	-1.527
	30	5.73152	3.87886		30	5.73152	-1.49748
	30	5.74176	3.86521		30	5.74176	-1.40662
	30	5.752	3.82359		30	5.752	-1.43676
	30	5.76224	3.89985		30	5.76224	-1.5071
	30	5.77248	3.92213		30	5.77248	-1.54025
	30	5.78272	3.9902		30	5.78272	-1.49634
	30	5.79296	4.04303		30	5.79296	-1.58963
	30	5.8032	4.03899		30	5.8032	-1.69254
	30	5.81344	4.04483		30	5.81344	-1.74924
	30	5.82368	4.00813		30	5.82368	-1.68813
	30	5.83392	4.06355		30	5.83392	-1.64492
	30	5.84416	4.00663		30	5.84416	-1.68252
	30	5.8544	3.94456		30	5.8544	-1.69286
	30	5.86464	3.90943		30	5.86464	-1.71273
	30	5.87488	3.90716		30	5.87488	-1.70426
	30	5.88512	3.98251		30	5.88512	-1.7634
	30	5.89536	3.99186		30	5.89536	-1.76356
	30	5.9056	3.99456		30	5.9056	-1.78622
	30	5.91584	3.92297		30	5.91584	-1.88411
	30	5.92608	3.92316		30	5.92608	-1.96262
	30	5.93632	3.82585		30	5.93632	-1.9794
	30	5.94656	3.85065		30	5.94656	-1.93426
	30	5.9568	3.87956		30	5.9568	-1.85065
	30	5.96704	3.93306		30	5.96704	-1.84869
	30	5.97728	3.99207		30	5.97728	-1.89214
	30	5.98752	4.00205		30	5.98752	-1.88583
	30	5.99776	3.94269		30	5.99776	-1.82555
	32	3.50944	0.00534058		32	3.50944	-0.0836754
	32	3.51968	0.0450439		32	3.51968	-0.100002
	32	3.52992	0.0463181		32	3.52992	-0.0780067
	32	3.54016	0.0202942		32	3.54016	-0.0305672
	32	3.5504	0.0450706		32	3.5504	-0.0671158
	32	3.56064	0.0857697		32	3.56064	-0.0929298
	32	3.57088	0.0630722		32	3.57088	-0.0704994
	32	3.58112	0.058197		32	3.58112	-0.106731
	32	3.59136	0.118103		32	3.59136	-0.108387
	32	3.6016	0.133232		32	3.6016	-0.0781021
	32	3.61184	0.0819321		32	3.61184	-0.111588
	32	3.62208	0.0994797		32	3.62208	-0.0749092
	32	3.63232	0.110622		32	3.63232	-0.0133896
	32	3.64256	0.133621		32	3.64256	-0.0615044
	32	3.6528	0.18438		32	3.6528	-0.0746346
	32	3.66304	0.219078		32	3.66304	-0.0765419
	32	3.67328	0.214424		32	3.67328	-0.0440712
	32	3.68352	0.201042		32	3.68352	-0.0517006
	32	3.69376	0.222157		32	3.69376	-0.0309029
	32	3.704	0.214134		32	3.704	-0.0577431
	32	3.71424	0.215225		32	3.71424	-0.0656013
	32	3.72448	0.145504		32	3.72448	-0.0806313
	32	3.73472	0.212315		32	3.73472	-0.0872269
	32	3.74496	0.22403		32	3.74496	-0.00436783
	32	3.7552	0.23946		32	3.7552	-0.00025177
	32	3.76544	0.264389		32	3.76544	-0.0328407
	32	3.77568	0.220333		32	3.77568	-0.0540657
	32	3.78592	0.232979		32	3.78592	-0.0652733
	32	3.79616	0.27998		32	3.79616	-0.0792923
	32	3.8064	0.334297		32	3.8064	-0.0562439
	32	3.81664	0.286919		32	3.81664	-0.0327568
	32	3.82688	0.291042		32	3.82688	-0.0308876
	32	3.83712	0.284241		32	3.83712	-0.0194016
	32	3.84736	0.328777		32	3.84736	-0.0212021
	32	3.8576	0.336121		32	3.8576	0.00301743
	32	3.86784	0.307823		32	3.86784	0.0897408
	32	3.87808	0.245724		32	3.87808	0.146168
	32	3.88832	0.246086		32	3.88832	0.139317
	32	3.89856	0.257		32	3.89856	0.0987129
	32	3.9088	0.218109		32	3.9088	0.175884
	32	3.91904	0.287491		32	3.91904	0.223896
	32	3.92928	0.250542		32	3.92928	0.235531
	32	3.93952	0.183311		32	3.93952	0.251137
	32	3.94976	0.195766		32	3.94976	0.181232
	32	3.96	0.22937		32	3.96	0.134075
	32	3.97024	0.183556		32	3.97024	0.182526
	32	3.98048	0.154198		32	3.98048	0.173271
	32	3.99072	0.183121		32	3.99072	0.241375
	32	4.00096	0.15136		32	4.00096	0.262604
	32	4.0112	0.164753		32	4.0112	0.321918
	32	4.02144	0.188702		32	4.02144	0.327499
	32	4.03168	0.159821		32	4.03168	0.339428
	32	4.04192	0.141003		32	4.04192	0.340511
	32	4.05216	0.149895		32	4.05216	0.391453
	32	4.0624	0.108032		32	4.0624	0.444485
	32	4.07264	0.0680847		32	4.07264	0.431805
	32	4.08288	0.135273		32	4.08288	0.475475
	32	4.09312	0.102814		32	4.09312	0.48666
	32	4.10336	0.142082		32	4.10336	0.435535
	32	4.1136	0.102989		32	4.1136	0.425831
	32	4.12384	0.0879288		32	4.12384	0.409824
	32	4.13408	0.0945396		32	4.13408	0.410698
	32	4.14432	0.126808		32	4.14432	0.406948
	32	4.15456	0.166073		32	4.15456	0.329926
	32	4.1648	0.118454		32	4.1648	0.3363
	32	4.17504	0.124596		32	4.17504	0.306698
	32	4.18528	0.126274		32	4.18528	0.285717
	32	4.19552	0.0747185		32	4.19552	0.290504
	32	4.20576	0.0663071		32	4.20576	0.278835
	32	4.216	0.133904		32	4.216	0.276836
	32	4.22624	0.113953		32	4.22624	0.244492
	32	4.23648	0.0564423		32	4.23648	0.266556
	32	4.24672	0.0404434		32	4.24672	0.250217
	32	4.25696	0.0740967		32	4.25696	0.256466
	32	4.2672	0.144932		32	4.2672	0.207069
	32	4.27744	0.100372		32	4.27744	0.193672
	32	4.28768	0.131783		32	4.28768	0.194046
	32	4.29792	0.154518		32	4.29792	0.104458
	32	4.30816	0.185486		32	4.30816	0.0748329
	32	4.3184	0.21175		32	4.3184	0.132233
	32	4.32864	0.113647		32	4.32864	0.110538
	32	4.33888	0.137589		32	4.33888	0.0931854
	32	4.34912	0.134003		32	4.34912	0.0792885
	32	4.35936	0.0789948		32	4.35936	0.0722046
	32	4.3696	0.0507202		32	4.3696	0.1082
	32	4.37984	0.0629425		32	4.37984	0.0552521
	32	4.39008	0.114685		32	4.39008	0.12273
	32	4.40032	0.104301		32	4.40032	0.0902596
	32	4.41056	0.0667992		32	4.41056	0.0717583
	32	4.4208	0.0609856		32	4.4208	0.0705261
	32	4.43104	0.0690384		32	4.43104	0.0631332
	32	4.44128	0.161003		32	4.44128	0.0264091
	32	4.45152	0.196159		32	4.45152	0.0269775
	32	4.46176	0.247856		32	4.46176	-0.0210686
	32	4.472	0.215111		32	4.472	0.051075
	32	4.48224	0.222721		32	4.48224	0.00874329
	32	4.49248	0.213665		32	4.49248	-0.0138245
	32	4.50272	0.120739		32	4.50272	-0.0372658
	32	4.51296	0.109756		32	4.51296	-0.0448952
	32	4.5232	0.107651		32	4.5232	-0.0199699
	32	4.53344	0.103172		32	4.53344	-0.035305
	32	4.54368	0.131157		32	4.54368	-0.0366898
	32	4.55392	0.11343		32	4.55392	-0.0319939
	32	4.56416	0.148247		32	4.56416	-0.0725288
	32	4.5744	0.190407		32	4.5744	-0.13129
	32	4.58464	0.162514		32	4.58464	-0.132839
	32	4.59488	0.146591		32	4.59488	-0.0833664
	32	4.60512	0.146065		32	4.60512	-0.033741
	32	4.61536	0.205364		32	4.61536	-0.0559158
	32	4.6256	0.173744		32	4.6256	-0.0478592
	32	4.63584	0.156864		32	4.63584	-0.0344582
	32	4.64608	0.176804		32	4.64608	-0.0269508
	32	4.65632	0.201145		32	4.65632	-0.0685654
	32	4.66656	0.184166		32	4.66656	-0.0953484
	32	4.6768	0.210903		32	4.6768	-0.0620537
	32	4.68704	0.155586		32	4.68704	-0.0729446
	32	4.69728	0.097126		32	4.69728	-0.105343
	32	4.70752	0.078022		32	4.70752	-0.148251
	32	4.71776	0.135345		32	4.71776	-0.228886
	32	4.728	0.191307		32	4.728	-0.248051
	32	4.73824	0.190331		32	4.73824	-0.208088
	32	4.74848	0.206928		32	4.74848	-0.199188
	32	4.75872	0.238392		32	4.75872	-0.177395
	32	4.76896	0.262318		32	4.76896	-0.178516
	32	4.7792	0.207535		32	4.7792	-0.207985
	32	4.78944	0.176834		32	4.78944	-0.192074
	32	4.79968	0.192177		32	4.79968	-0.203056
	32	4.80992	0.209686		32	4.80992	-0.21011
	32	4.82016	0.173874		32	4.82016	-0.266171
	32	4.8304	0.201714		32	4.8304	-0.340332
	32	4.84064	0.251968		32	4.84064	-0.316776
	32	4.85088	0.230896		32	4.85088	-0.378349
	32	4.86112	0.23967		32	4.86112	-0.416924
	32	4.87136	0.239731		32	4.87136	-0.446369
	32	4.8816	0.258896		32	4.8816	-0.420662
	32	4.89184	0.23069		32	4.89184	-0.460308
	32	4.90208	0.234947		32	4.90208	-0.542614
	32	4.91232	0.268528		32	4.91232	-0.623333
	32	4.92256	0.298477		32	4.92256	-0.65443
	32	4.9328	0.270985		32	4.9328	-0.708725
	32	4.94304	0.313721		32	4.94304	-0.781269
	32	4.95328	0.279358		32	4.95328	-0.838661
	32	4.96352	0.281982		32	4.96352	-0.833691
	32	4.97376	0.330635		32	4.97376	-0.837543
	32	4.984	0.396515		32	4.984	-0.836628
	32	4.99424	0.41634		32	4.99424	-0.836903
	32	5.00448	0.441162		32	5.00448	-0.902843
	32	5.01472	0.480778		32	5.01472	-0.967335
	32	5.02496	0.495098		32	5.02496	-1.00864
	32	5.0352	0.463348		32	5.0352	-1.07813
	32	5.04544	0.500092		32	5.04544	-1.06417
	32	5.05568	0.609806		32	5.05568	-1.10431
	32	5.06592	0.643066		32	5.06592	-1.10845
	32	5.07616	0.609135		32	5.07616	-1.14573
	32	5.0864	0.658997		32	5.0864	-1.2685
	32	5.09664	0.748741		32	5.09664	-1.34492
	32	5.10688	0.810966		32	5.10688	-1.35737
	32	5.11712	0.837578		32	5.11712	-1.38342
	32	5.12736	0.954788		32	5.12736	-1.4298
	32	5.1376	1.09074		32	5.1376	-1.44353
	32	5.14784	1.14008		32	5.14784	-1.58416
	32	5.15808	1.10988		32	5.15808	-1.53205
	32	5.16832	1.19415		32	5.16832	-1.56681
	32	5.17856	1.29074		32	5.17856	-1.63345
	32	5.1888	1.34139		32	5.1888	-1.64709
	32	5.19904	1.33779		32	5.19904	-1.63229
	32	5.20928	1.42813		32	5.20928	-1.67386
	32	5.21952	1.52454		32	5.21952	-1.71763
	32	5.22976	1.64348		32	5.22976	-1.79889
	32	5.24	1.80114		32	5.24	-1.84087
	32	5.25024	1.86678		32	5.25024	-1.90306
	32	5.26048	1.96425		32	5.26048	-1.90485
	32	5.27072	2.05977		32	5.27072	-1.93559
	32	5.28096	2.06904		32	5.28096	-1.90416
	32	5.2912	2.18325		32	5.2912	-1.9179
	32	5.30144	2.27253		32	5.30144	-2.08969
	32	5.31168	2.29788		32	5.31168	-2.22409
	32	5.32192	2.38557		32	5.32192	-2.34245
	32	5.33216	2.45901		32	5.33216	-2.3275
	32	5.3424	2.52507		32	5.3424	-2.34779
	32	5.35264	2.63271		32	5.35264	-2.41166
	32	5.36288	2.69991		32	5.36288	-2.48026
	32	5.37312	2.80108		32	5.37312	-2.51686
	32	5.38336	3.00432		32	5.38336	-2.53319
	32	5.3936	3.07008		32	5.3936	-2.59954
	32	5.40384	3.09204		32	5.40384	-2.59455
	32	5.41408	3.17441		32	5.41408	-2.66642
	32	5.42432	3.28486		32	5.42432	-2.75102
	32	5.43456	3.32224		32	5.43456	-2.71454
	32	5.4448	3.46411		32	5.4448	-2.78117
	32	5.45504	3.62965		32	5.45504	-2.84094
	32	5.46528	3.67738		32	5.46528	-2.88173
	32	5.47552	3.7119		32	5.47552	-2.92656
	32	5.48576	3.7578		32	5.48576	-2.86889
	32	5.496	3.88568		32	5.496	-2.81839
	32	5.50624	3.94482		32	5.50624	-2.88068
	32	5.51648	4.04968		32	5.51648	-2.9471
	32	5.52672	4.11208		32	5.52672	-2.98674
	32	5.53696	4.14135		32	5.53696	-3.02773
	32	5.5472	4.21885		32	5.5472	-3.09433
	32	5.55744	4.2091		32	5.55744	-3.24093
	32	5.56768	4.28389		32	5.56768	-3.25983
	32	5.57792	4.39333		32	5.57792	-3.22972
	32	5.58816	4.48486		32	5.58816	-3.25962
	32	5.5984	4.49457		32	5.5984	-3.26839
	32	5.60864	4.32963		32	5.60864	-3.29551
	32	5.61888	4.42074		32	5.61888	-3.29097
	32	5.62912	4.41377		32	5.62912	-3.25016
	32	5.63936	4.61746		32	5.63936	-3.1992
	32	5.6496	4.69128		32	5.6496	-3.13285
	32	5.65984	4.69175		32	5.65984	-3.09539
	32	5.67008	4.65419		32	5.67008	-3.07137
	32	5.68032	4.67838		32	5.68032	-3.06295
	32	5.69056	4.71769		32	5.69056	-3.08876
	32	5.7008	4.73749		32	5.7008	-3.13458
	32	5.71104	4.73109		32	5.71104	-3.21804
	32	5.72128	4.72847		32	5.72128	-3.30614
	32	5.73152	4.6895		32	5.73152	-3.30521
	32	5.74176	4.6921		32	5.74176	-3.34705
	32	5.752	4.66906		32	5.752	-3.36032
	32	5.76224	4.72625		32	5.76224	-3.3382
	32	5.77248	4.74471		32	5.77248	-3.30671
	32	5.78272	4.7481		32	5.78272	-3.30279
	32	5.79296	4.76792		32	5.79296	-3.28242
	32	5.8032	4.76656		32	5.8032	-3.273
	32	5.81344	4.80145		32	5.81344	-3.32486
	32	5.82368	4.8789		32	5.82368	-3.37302
	32	5.83392	4.92848		32	5.83392	-3.3586
	32	5.84416	4.90675		32	5.84416	-3.30339
	32	5.8544	4.95402		32	5.8544	-3.31477
	32	5.86464	4.96082		32	5.86464	-3.30141
	32	5.87488	4.87929		32	5.87488	-3.27406
	32	5.88512	4.88317		32	5.88512	-3.28288
	32	5.89536	4.93844		32	5.89536	-3.215
	32	5.9056	4.92798		32	5.9056	-3.22424
	32	5.91584	4.93409		32	5.91584	-3.18898
	32	5.92608	4.96315		32	5.92608	-3.14396
	32	5.93632	4.95685		32	5.93632	-3.1321
	32	5.94656	4.97723		32	5.94656	-3.1466
	32	5.9568	4.95278		32	5.9568	-3.15479
	32	5.96704	4.9387		32	5.96704	-3.16851
	32	5.97728	4.85167		32	5.97728	-3.15475
	32	5.98752	4.88592		32	5.98752	-3.14325
	32	5.99776	4.8572		32	5.99776	-3.13706
	34	3.50944	0.167061		34	3.50944	-0.130768
	34	3.51968	0.149673		34	3.51968	-0.126747
	34	3.52992	0.131901		34	3.52992	-0.124054
	34	3.54016	0.068512		34	3.54016	-0.15242
	34	3.5504	0.104614		34	3.5504	-0.114216
	34	3.56064	0.12278		34	3.56064	-0.08992
	34	3.57088	0.160286		34	3.57088	-0.076973
	34	3.58112	0.153824		34	3.58112	-0.0385056
	34	3.59136	0.14782		34	3.59136	-0.0405693
	34	3.6016	0.177658		34	3.6016	-0.0195694
	34	3.61184	0.197479		34	3.61184	-0.0325584
	34	3.62208	0.213055		34	3.62208	-0.0486984
	34	3.63232	0.205975		34	3.63232	-0.0484314
	34	3.64256	0.23341		34	3.64256	-0.0146027
	34	3.6528	0.276009		34	3.6528	-0.0231857
	34	3.66304	0.321148		34	3.66304	-0.0136719
	34	3.67328	0.312649		34	3.67328	0.0418243
	34	3.68352	0.273388		34	3.68352	0.0486145
	34	3.69376	0.24847		34	3.69376	0.0339661
	34	3.704	0.259865		34	3.704	0.0425949
	34	3.71424	0.327225		34	3.71424	0.0276718
	34	3.72448	0.282589		34	3.72448	0.0297775
	34	3.73472	0.346581		34	3.73472	0.0303497
	34	3.74496	0.33498		34	3.74496	-0.0213203
	34	3.7552	0.297058		34	3.7552	-0.0296326
	34	3.76544	0.335602		34	3.76544	0.0356598
	34	3.77568	0.287125		34	3.77568	0.063961
	34	3.78592	0.332848		34	3.78592	0.0395737
	34	3.79616	0.314827		34	3.79616	0.0853767
	34	3.8064	0.269161		34	3.8064	0.0591927
	34	3.81664	0.264946		34	3.81664	0.0583496
	34	3.82688	0.278191		34	3.82688	0.096611
	34	3.83712	0.223946		34	3.83712	0.0618896
	34	3.84736	0.21072		34	3.84736	0.0921555
	34	3.8576	0.216568		34	3.8576	0.0811005
	34	3.86784	0.309418		34	3.86784	0.0565338
	34	3.87808	0.347584		34	3.87808	0.0747833
	34	3.88832	0.290894		34	3.88832	0.119804
	34	3.89856	0.269707		34	3.89856	0.123241
	34	3.9088	0.291534		34	3.9088	0.114365
	34	3.91904	0.289276		34	3.91904	0.0814819
	34	3.92928	0.270454		34	3.92928	0.115936
	34	3.93952	0.236591		34	3.93952	0.0934067
	34	3.94976	0.243095		34	3.94976	0.140182
	34	3.96	0.193901		34	3.96	0.154869
	34	3.97024	0.186684		34	3.97024	0.139534
	34	3.98048	0.231018		34	3.98048	0.18008
	34	3.99072	0.226295		34	3.99072	0.169731
	34	4.00096	0.189442		34	4.00096	0.142723
	34	4.0112	0.140274		34	4.0112	0.162041
	34	4.02144	0.151249		34	4.02144	0.217346
	34	4.03168	0.172028		34	4.03168	0.2388
	34	4.04192	0.152611		34	4.04192	0.206837
	34	4.05216	0.138809		34	4.05216	0.201973
	34	4.0624	0.209381		34	4.0624	0.167194
	34	4.07264	0.193249		34	4.07264	0.187851
	34	4.08288	0.177814		34	4.08288	0.15683
	34	4.09312	0.195335		34	4.09312	0.138245
	34	4.10336	0.193359		34	4.10336	0.166378
	34	4.1136	0.162209		34	4.1136	0.171726
	34	4.12384	0.143517		34	4.12384	0.22538
	34	4.13408	0.174091		34	4.13408	0.195942
	34	4.14432	0.113602		34	4.14432	0.183952
	34	4.15456	0.141357		34	4.15456	0.144558
	34	4.1648	0.15564		34	4.1648	0.126575
	34	4.17504	0.140598		34	4.17504	0.104729
	34	4.18528	0.0954742		34	4.18528	0.100357
	34	4.19552	0.12471		34	4.19552	0.0825806
	34	4.20576	0.163864		34	4.20576	0.114738
	34	4.216	0.125061		34	4.216	0.09235
	34	4.22624	0.0784302		34	4.22624	0.0730515
	34	4.23648	0.0780182		34	4.23648	0.00761414
	34	4.24672	0.0845642		34	4.24672	-0.0451469
	34	4.25696	0.0873642		34	4.25696	-0.019371
	34	4.2672	0.0972595		34	4.2672	-0.0591888
	34	4.27744	0.126102		34	4.27744	-0.0407562
	34	4.28768	0.116966		34	4.28768	-0.0347824
	34	4.29792	0.182007		34	4.29792	-0.0531273
	34	4.30816	0.0554886		34	4.30816	-0.0746994
	34	4.3184	0.0557251		34	4.3184	-0.0727081
	34	4.32864	0.0576591		34	4.32864	-0.0763321
	34	4.33888	0.0784607		34	4.33888	-0.113045
	34	4.34912	0.00872803		34	4.34912	-0.0792542
	34	4.35936	-0.0080719		34	4.35936	-0.114166
	34	4.3696	0.0226707		34	4.3696	-0.0650902
	34	4.37984	0.0498314		34	4.37984	-0.0445213
	34	4.39008	0.0194321		34	4.39008	-0.0754776
	34	4.40032	0.0552864		34	4.40032	-0.0502396
	34	4.41056	0.0793495		34	4.41056	-0.0704842
	34	4.4208	0.0325394		34	4.4208	-0.0664978
	34	4.43104	0.0190887		34	4.43104	-0.0312996
	34	4.44128	-0.0345154		34	4.44128	-0.0140076
	34	4.45152	0.0197144		34	4.45152	-0.0446281
	34	4.46176	0.044487		34	4.46176	-0.0359077
	34	4.472	0.0413055		34	4.472	-0.0501823
	34	4.48224	0.060318		34	4.48224	0.012085
	34	4.49248	-0.0107231		34	4.49248	0.0735207
	34	4.50272	-0.0649414		34	4.50272	0.0462418
	34	4.51296	-0.0778694		34	4.51296	0.0198936
	34	4.5232	-0.0830421		34	4.5232	0.0262375
	34	4.53344	-0.0839691		34	4.53344	0.0432663
	34	4.54368	-0.0662613		34	4.54368	-0.0436935
	34	4.55392	-0.115501		34	4.55392	-0.0109749
	34	4.56416	-0.167816		34	4.56416	-0.0631943
	34	4.5744	-0.179008		34	4.5744	-0.137737
	34	4.58464	-0.139168		34	4.58464	-0.0532608
	34	4.59488	-0.160278		34	4.59488	-0.013237
	34	4.60512	-0.148315		34	4.60512	-0.0259399
	34	4.61536	-0.12381		34	4.61536	-0.0187073
	34	4.6256	-0.16037		34	4.6256	0.0117493
	34	4.63584	-0.214905		34	4.63584	-0.0196304
	34	4.64608	-0.16853		34	4.64608	-0.0241852
	34	4.65632	-0.163345		34	4.65632	-0.00901413
	34	4.66656	-0.207321		34	4.66656	0.0071373
	34	4.6768	-0.218643		34	4.6768	-0.0206795
	34	4.68704	-0.227024		34	4.68704	-0.0344238
	34	4.69728	-0.204517		34	4.69728	-0.0762367
	34	4.70752	-0.220188		34	4.70752	-0.0196228
	34	4.71776	-0.248787		34	4.71776	0.00176239
	34	4.728	-0.265182		34	4.728	-0.0223236
	34	4.73824	-0.263229		34	4.73824	-0.0188293
	34	4.74848	-0.28772		34	4.74848	-0.0579033
	34	4.75872	-0.271961		34	4.75872	-0.0577507
	34	4.76896	-0.288857		34	4.76896	-0.0228653
	34	4.7792	-0.313374		34	4.7792	-0.0886841
	34	4.78944	-0.282455		34	4.78944	-0.0650673
	34	4.79968	-0.304901		34	4.79968	-0.0706711
	34	4.80992	-0.320381		34	4.80992	-0.10302
	34	4.82016	-0.274254		34	4.82016	-0.151054
	34	4.8304	-0.287567		34	4.8304	-0.189186
	34	4.84064	-0.276573		34	4.84064	-0.209084
	34	4.85088	-0.312019		34	4.85088	-0.232574
	34	4.86112	-0.326069		34	4.86112	-0.272499
	34	4.87136	-0.309338		34	4.87136	-0.286903
	34	4.8816	-0.237415		34	4.8816	-0.329384
	34	4.89184	-0.238457		34	4.89184	-0.317665
	34	4.90208	-0.251755		34	4.90208	-0.257023
	34	4.91232	-0.279778		34	4.91232	-0.285614
	34	4.92256	-0.21476		34	4.92256	-0.33213
	34	4.9328	-0.194366		34	4.9328	-0.366756
	34	4.94304	-0.216702		34	4.94304	-0.339081
	34	4.95328	-0.139801		34	4.95328	-0.348099
	34	4.96352	-0.106277		34	4.96352	-0.43718
	34	4.97376	-0.0402298		34	4.97376	-0.405746
	34	4.984	-0.04076		34	4.984	-0.395882
	34	4.99424	0.019165		34	4.99424	-0.460648
	34	5.00448	0.0671844		34	5.00448	-0.554523
	34	5.01472	0.0205231		34	5.01472	-0.565502
	34	5.02496	0.0171394		34	5.02496	-0.57555
	34	5.0352	0.0317383		34	5.0352	-0.591816
	34	5.04544	0.0764389		34	5.04544	-0.640511
	34	5.05568	0.13958		34	5.05568	-0.636627
	34	5.06592	0.248592		34	5.06592	-0.714703
	34	5.07616	0.251984		34	5.07616	-0.750778
	34	5.0864	0.300476		34	5.0864	-0.762466
	34	5.09664	0.334381		34	5.09664	-0.822289
	34	5.10688	0.377811		34	5.10688	-0.89109
	34	5.11712	0.357494		34	5.11712	-0.929947
	34	5.12736	0.408943		34	5.12736	-0.954308
	34	5.1376	0.460407		34	5.1376	-1.05186
	34	5.14784	0.556473		34	5.14784	-1.08106
	34	5.15808	0.710602		34	5.15808	-1.13969
	34	5.16832	0.822887		34	5.16832	-1.20218
	34	5.17856	0.885448		34	5.17856	-1.29952
	34	5.1888	0.949257		34	5.1888	-1.33863
	34	5.19904	1.08267		34	5.19904	-1.35101
	34	5.20928	1.17869		34	5.20928	-1.37708
	34	5.21952	1.28761		34	5.21952	-1.4155
	34	5.22976	1.48983		34	5.22976	-1.42915
	34	5.24	1.6377		34	5.24	-1.49321
	34	5.25024	1.76135		34	5.25024	-1.55182
	34	5.26048	1.83647		34	5.26048	-1.58233
	34	5.27072	1.88548		34	5.27072	-1.69361
	34	5.28096	2.02018		34	5.28096	-1.77855
	34	5.2912	2.08577		34	5.2912	-1.85919
	34	5.30144	2.17775		34	5.30144	-1.91708
	34	5.31168	2.36845		34	5.31168	-1.9265
	34	5.32192	2.54911		34	5.32192	-1.93082
	34	5.33216	2.67677		34	5.33216	-1.95681
	34	5.3424	2.84319		34	5.3424	-1.99069
	34	5.35264	2.93042		34	5.35264	-2.03913
	34	5.36288	3.04729		34	5.36288	-2.07345
	34	5.37312	3.14626		34	5.37312	-2.11323
	34	5.38336	3.22707		34	5.38336	-2.21188
	34	5.3936	3.2985		34	5.3936	-2.39627
	34	5.40384	3.37177		34	5.40384	-2.39411
	34	5.41408	3.50008		34	5.41408	-2.42289
	34	5.42432	3.53696		34	5.42432	-2.4903
	34	5.43456	3.66044		34	5.43456	-2.56736
	34	5.4448	3.79646		34	5.4448	-2.54166
	34	5.45504	3.87414		34	5.45504	-2.57048
	34	5.46528	3.95576		34	5.46528	-2.65298
	34	5.47552	3.96597		34	5.47552	-2.68906
	34	5.48576	4.09669		34	5.48576	-2.75045
	34	5.496	4.22416		34	5.496	-2.82151
	34	5.50624	4.25622		34	5.50624	-2.81147
	34	5.51648	4.34679		34	5.51648	-2.82127
	34	5.52672	4.43569		34	5.52672	-2.97034
	34	5.53696	4.49327		34	5.53696	-2.97633
	34	5.5472	4.55254		34	5.5472	-2.97955
	34	5.55744	4.66006		34	5.55744	-2.95341
	34	5.56768	4.69791		34	5.56768	-3.03236
	34	5.57792	4.78266		34	5.57792	-3.09048
	34	5.58816	4.8172		34	5.58816	-3.07718
	34	5.5984	4.91342		34	5.5984	-3.17986
	34	5.60864	5.01891		34	5.60864	-3.20031
	34	5.61888	5.05547		34	5.61888	-3.23402
	34	5.62912	5.10777		34	5.62912	-3.29796
	34	5.63936	5.09675		34	5.63936	-3.30813
	34	5.6496	5.17184		34	5.6496	-3.36876
	34	5.65984	5.18532		34	5.65984	-3.3828
	34	5.67008	5.23441		34	5.67008	-3.35794
	34	5.68032	5.20186		34	5.68032	-3.39417
	34	5.69056	5.19365		34	5.69056	-3.45403
	34	5.7008	5.22433		34	5.7008	-3.48161
	34	5.71104	5.25749		34	5.71104	-3.4919
	34	5.72128	5.31154		34	5.72128	-3.47458
	34	5.73152	5.30246		34	5.73152	-3.53323
	34	5.74176	5.29691		34	5.74176	-3.54387
	34	5.752	5.30333		34	5.752	-3.60734
	34	5.76224	5.34342		34	5.76224	-3.57908
	34	5.77248	5.41273		34	5.77248	-3.52061
	34	5.78272	5.34063		34	5.78272	-3.54932
	34	5.79296	5.298		34	5.79296	-3.59904
	34	5.8032	5.34348		34	5.8032	-3.62065
	34	5.81344	5.40982		34	5.81344	-3.65893
	34	5.82368	5.36595		34	5.82368	-3.62475
	34	5.83392	5.29966		34	5.83392	-3.62388
	34	5.84416	5.31355		34	5.84416	-3.6387
	34	5.8544	5.29964		34	5.8544	-3.63426
	34	5.86464	5.2924		34	5.86464	-3.61837
	34	5.87488	5.24022		34	5.87488	-3.67509
	34	5.88512	5.13464		34	5.88512	-3.71232
	34	5.89536	5.0199		34	5.89536	-3.67997
	34	5.9056	5.03902		34	5.9056	-3.68978
	34	5.91584	5.04118		34	5.91584	-3.64375
	34	5.92608	5.01256		34	5.92608	-3.63876
	34	5.93632	4.99076		34	5.93632	-3.67655
	34	5.94656	5.01551		34	5.94656	-3.72556
	34	5.9568	5.05225		34	5.9568	-3.80599
	34	5.96704	5.03838		34	5.96704	-3.78901
	34	5.97728	4.999		34	5.97728	-3.74724
	34	5.98752	4.94206		34	5.98752	-3.75025
	34	5.99776	4.95016		34	5.99776	-3.7561
	36	3.50944	0.0788879		36	3.50944	0.0811996
	36	3.51968	0.0402145		36	3.51968	0.0996017
	36	3.52992	-0.0183296		36	3.52992	0.0509186
	36	3.54016	0.0147514		36	3.54016	0.0772934
	36	3.5504	0.0148354		36	3.5504	0.0774384
	36	3.56064	-0.00157547		36	3.56064	0.0960503
	36	3.57088	-0.0463638		36	3.57088	0.136978
	36	3.58112	-0.026474		36	3.58112	0.0758743
	36	3.59136	-0.0205307		36	3.59136	0.052536
	36	3.6016	-0.0438347		36	3.6016	0.124252
	36	3.61184	-0.0584602		36	3.61184	0.102592
	36	3.62208	-0.00701523		36	3.62208	0.0297813
	36	3.63232	0.0292892		36	3.63232	0.0667572
	36	3.64256	0.0145874		36	3.64256	0.0726814
	36	3.6528	-0.0233154		36	3.6528	0.0281601
	36	3.66304	-0.00564957		36	3.66304	0.0281258
	36	3.67328	-0.0183411		36	3.67328	0.0666466
	36	3.68352	0.0182381		36	3.68352	-0.00827789
	36	3.69376	0.0343323		36	3.69376	-0.023571
	36	3.704	-0.039917		36	3.704	-0.0578384
	36	3.71424	-0.0257874		36	3.71424	0.00763702
	36	3.72448	0.0162354		36	3.72448	0.0295105
	36	3.73472	0.0106163		36	3.73472	0.081913
	36	3.74496	0.0670967		36	3.74496	0.0711784
	36	3.7552	0.041153		36	3.7552	0.0790672
	36	3.76544	0.0756073		36	3.76544	0.0817337
	36	3.77568	0.138535		36	3.77568	0.109032
	36	3.78592	0.108082		36	3.78592	0.0837631
	36	3.79616	0.0795708		36	3.79616	0.0742188
	36	3.8064	0.108498		36	3.8064	0.137409
	36	3.81664	0.144478		36	3.81664	0.111626
	36	3.82688	0.126186		36	3.82688	0.0686646
	36	3.83712	0.135803		36	3.83712	0.112434
	36	3.84736	0.131569		36	3.84736	0.0385628
	36	3.8576	0.120842		36	3.8576	0.0829659
	36	3.86784	0.109051		36	3.86784	0.14436
	36	3.87808	0.0675545		36	3.87808	0.198349
	36	3.88832	0.0702133		36	3.88832	0.220909
	36	3.89856	0.107239		36	3.89856	0.185539
	36	3.9088	0.0585327		36	3.9088	0.209644
	36	3.91904	0.0577393		36	3.91904	0.244019
	36	3.92928	-0.0112915		36	3.92928	0.279579
	36	3.93952	0.0310173		36	3.93952	0.315239
	36	3.94976	0.0167465		36	3.94976	0.357517
	36	3.96	-0.0268326		36	3.96	0.35463
	36	3.97024	-0.0620956		36	3.97024	0.391975
	36	3.98048	-0.00492477		36	3.98048	0.424034
	36	3.99072	-0.0650406		36	3.99072	0.43457
	36	4.00096	-0.0121307		36	4.00096	0.504669
	36	4.0112	0.0646057		36	4.0112	0.50436
	36	4.02144	0.0562897		36	4.02144	0.543358
	36	4.03168	0.025116		36	4.03168	0.560226
	36	4.04192	-0.00644684		36	4.04192	0.590137
	36	4.05216	-0.0439262		36	4.05216	0.636101
	36	4.0624	-0.0347824		36	4.0624	0.610603
	36	4.07264	-0.070652		36	4.07264	0.631889
	36	4.08288	-0.0651894		36	4.08288	0.626293
	36	4.09312	-0.0467186		36	4.09312	0.626625
	36	4.10336	-0.0531158		36	4.10336	0.592247
	36	4.1136	-0.0838585		36	4.1136	0.620064
	36	4.12384	-0.113945		36	4.12384	0.612869
	36	4.13408	-0.104019		36	4.13408	0.616489
	36	4.14432	-0.177383		36	4.14432	0.539639
	36	4.15456	-0.20599		36	4.15456	0.561367
	36	4.1648	-0.23811		36	4.1648	0.538586
	36	4.17504	-0.235771		36	4.17504	0.519554
	36	4.18528	-0.189377		36	4.18528	0.534103
	36	4.19552	-0.244354		36	4.19552	0.513088
	36	4.20576	-0.197746		36	4.20576	0.505287
	36	4.216	-0.174561		36	4.216	0.473324
	36	4.22624	-0.16824		36	4.22624	0.467167
	36	4.23648	-0.140694		36	4.23648	0.428043
	36	4.24672	-0.151382		36	4.24672	0.356674
	36	4.25696	-0.182293		36	4.25696	0.367104
	36	4.2672	-0.17733		36	4.2672	0.327126
	36	4.27744	-0.165596		36	4.27744	0.310982
	36	4.28768	-0.122108		36	4.28768	0.241173
	36	4.29792	-0.11161		36	4.29792	0.238747
	36	4.30816	-0.0814209		36	4.30816	0.273102
	36	4.3184	-0.116802		36	4.3184	0.257561
	36	4.32864	-0.125851		36	4.32864	0.259583
	36	4.33888	-0.103943		36	4.33888	0.266006
	36	4.34912	-0.0929794		36	4.34912	0.246563
	36	4.35936	-0.0842628		36	4.35936	0.198425
	36	4.3696	-0.08181		36	4.3696	0.194458
	36	4.37984	-0.0879211		36	4.37984	0.230385
	36	4.39008	-0.136585		36	4.39008	0.248131
	36	4.40032	-0.181461		36	4.40032	0.247036
	36	4.41056	-0.150734		36	4.41056	0.181892
	36	4.4208	-0.107464		36	4.4208	0.191811
	36	4.43104	-0.0632858		36	4.43104	0.169518
	36	4.44128	-0.0990295		36	4.44128	0.161797
	36	4.45152	-0.0903702		36	4.45152	0.194321
	36	4.46176	-0.0748138		36	4.46176	0.139072
	36	4.472	-0.0760193		36	4.472	0.138107
	36	4.48224	-0.0257149		36	4.48224	0.211594
	36	4.49248	-0.00846481		36	4.49248	0.206223
	36	4.50272	-0.046627		36	4.50272	0.218132
	36	4.51296	0.00680161		36	4.51296	0.171547
	36	4.5232	-0.014801		36	4.5232	0.131462
	36	4.53344	-0.0951424		36	4.53344	0.11385
	36	4.54368	-0.142586		36	4.54368	0.190861
	36	4.55392	-0.170059		36	4.55392	0.195465
	36	4.56416	-0.142845		36	4.56416	0.183258
	36	4.5744	-0.152267		36	4.5744	0.189453
	36	4.58464	-0.19561		36	4.58464	0.166763
	36	4.59488	-0.178413		36	4.59488	0.161507
	36	4.60512	-0.15501		36	4.60512	0.150505
	36	4.61536	-0.156395		36	4.61536	0.116508
	36	4.6256	-0.149368		36	4.6256	0.103813
	36	4.63584	-0.166412		36	4.63584	0.111832
	36	4.64608	-0.17524		36	4.64608	0.0763206
	36	4.65632	-0.156593		36	4.65632	0.0733223
	36	4.66656	-0.109055		36	4.66656	0.123375
	36	4.6768	-0.0897522		36	4.6768	0.160538
	36	4.68704	-0.0858231		36	4.68704	0.183228
	36	4.69728	-0.0499916		36	4.69728	0.167435
	36	4.70752	-0.0242004		36	4.70752	0.179008
	36	4.71776	-0.014946		36	4.71776	0.219978
	36	4.728	-0.0813446		36	4.728	0.194786
	36	4.73824	-0.0890045		36	4.73824	0.142059
	36	4.74848	-0.0721245		36	4.74848	0.129761
	36	4.75872	-0.0488014		36	4.75872	0.106094
	36	4.76896	-0.0485611		36	4.76896	0.113598
	36	4.7792	-0.0583458		36	4.7792	0.0875397
	36	4.78944	-0.0834427		36	4.78944	0.113426
	36	4.79968	-0.119705		36	4.79968	0.0369873
	36	4.80992	-0.134445		36	4.80992	-0.0102158
	36	4.82016	-0.124763		36	4.82016	0.0631714
	36	4.8304	-0.0803299		36	4.8304	0.0342789
	36	4.84064	-0.0466232		36	4.84064	0.0252686
	36	4.85088	-0.0270538		36	4.85088	0.0174866
	36	4.86112	-0.0696793		36	4.86112	0.0278435
	36	4.87136	-0.0607834		36	4.87136	0.0174332
	36	4.8816	-0.0428314		36	4.8816	0.0156555
	36	4.89184	0.0180511		36	4.89184	-0.0151215
	36	4.90208	-0.050148		36	4.90208	-0.0635719
	36	4.91232	-0.0942192		36	4.91232	-0.0899124
	36	4.92256	-0.0862923		36	4.92256	-0.145634
	36	4.9328	-0.0609512		36	4.9328	-0.205177
	36	4.94304	-0.0228958		36	4.94304	-0.199539
	36	4.95328	-0.0139542		36	4.95328	-0.22068
	36	4.96352	0.0245819		36	4.96352	-0.208832
	36	4.97376	0.0605545		36	4.97376	-0.20076
	36	4.984	0.048851		36	4.984	-0.24324
	36	4.99424	0.0569534		36	4.99424	-0.268097
	36	5.00448	0.0442696		36	5.00448	-0.323044
	36	5.01472	0.129593		36	5.01472	-0.412258
	36	5.02496	0.112801		36	5.02496	-0.439606
	36	5.0352	0.173157		36	5.0352	-0.46468
	36	5.04544	0.196518		36	5.04544	-0.46492
	36	5.05568	0.286884		36	5.05568	-0.497612
	36	5.06592	0.283302		36	5.06592	-0.603645
	36	5.07616	0.32481		36	5.07616	-0.678524
	36	5.0864	0.410583		36	5.0864	-0.690594
	36	5.09664	0.412453		36	5.09664	-0.70644
	36	5.10688	0.41153		36	5.10688	-0.74588
	36	5.11712	0.518333		36	5.11712	-0.803848
	36	5.12736	0.496849		36	5.12736	-0.859497
	36	5.1376	0.556747		36	5.1376	-0.920376
	36	5.14784	0.657063		36	5.14784	-0.915321
	36	5.15808	0.717606		36	5.15808	-0.911625
	36	5.16832	0.804375		36	5.16832	-1.01785
	36	5.17856	0.871269		36	5.17856	-1.18258
	36	5.1888	0.892971		36	5.1888	-1.17375
	36	5.19904	0.972618		36	5.19904	-1.15171
	36	5.20928	1.04364		36	5.20928	-1.13995
	36	5.21952	1.1353		36	5.21952	-1.1927
	36	5.22976	1.22089		36	5.22976	-1.25827
	36	5.24	1.31995		36	5.24	-1.27434
	36	5.25024	1.38797		36	5.25024	-1.38906
	36	5.26048	1.52396		36	5.26048	-1.43026
	36	5.27072	1.59041		36	5.27072	-1.48946
	36	5.28096	1.65335		36	5.28096	-1.58041
	36	5.2912	1.79622		36	5.2912	-1.64753
	36	5.30144	1.94248		36	5.30144	-1.74648
	36	5.31168	2.01791		36	5.31168	-1.61991
	36	5.32192	2.15986		36	5.32192	-1.62761
	36	5.33216	2.2632		36	5.33216	-1.70781
	36	5.3424	2.3952		36	5.3424	-1.9039
	36	5.35264	2.452		36	5.35264	-1.96602
	36	5.36288	2.53291		36	5.36288	-2.05312
	36	5.37312	2.54564		36	5.37312	-2.11716
	36	5.38336	2.65187		36	5.38336	-2.24772
	36	5.3936	2.78814		36	5.3936	-2.29707
	36	5.40384	2.89317		36	5.40384	-2.28214
	36	5.41408	2.97207		36	5.41408	-2.29388
	36	5.42432	3.12626		36	5.42432	-2.38002
	36	5.43456	3.22416		36	5.43456	-2.4644
	36	5.4448	3.26832		36	5.4448	-2.55803
	36	5.45504	3.36047		36	5.45504	-2.66938
	36	5.46528	3.44328		36	5.46528	-2.74861
	36	5.47552	3.54664		36	5.47552	-2.76419
	36	5.48576	3.73035		36	5.48576	-2.73944
	36	5.496	3.81827		36	5.496	-2.73324
	36	5.50624	3.90714		36	5.50624	-2.77219
	36	5.51648	4.03278		36	5.51648	-2.81287
	36	5.52672	4.14414		36	5.52672	-2.81353
	36	5.53696	4.21729		36	5.53696	-2.88555
	36	5.5472	4.31366		36	5.5472	-2.93533
	36	5.55744	4.36938		36	5.55744	-3.00097
	36	5.56768	4.47893		36	5.56768	-3.00758
	36	5.57792	4.60874		36	5.57792	-3.03925
	36	5.58816	4.71667		36	5.58816	-3.05383
	36	5.5984	4.83743		36	5.5984	-3.10658
	36	5.60864	4.93943		36	5.60864	-3.10421
	36	5.61888	5.06242		36	5.61888	-3.17987
	36	5.62912	5.15051		36	5.62912	-3.25455
	36	5.63936	5.18242		36	5.63936	-3.31126
	36	5.6496	5.27695		36	5.6496	-3.3292
	36	5.65984	5.34885		36	5.65984	-3.36851
	36	5.67008	5.49469		36	5.67008	-3.42868
	36	5.68032	5.5342		36	5.68032	-3.45174
	36	5.69056	5.54972		36	5.69056	-3.49224
	36	5.7008	5.5955		36	5.7008	-3.45942
	36	5.71104	5.64947		36	5.71104	-3.47063
	36	5.72128	5.74876		36	5.72128	-3.42764
	36	5.73152	5.79315		36	5.73152	-3.45639
	36	5.74176	5.77399		36	5.74176	-3.48306
	36	5.752	5.84752		36	5.752	-3.62435
	36	5.76224	5.91724		36	5.76224	-3.62706
	36	5.77248	5.97987		36	5.77248	-3.68642
	36	5.78272	5.97668		36	5.78272	-3.6107
	36	5.79296	5.94555		36	5.79296	-3.56954
	36	5.8032	6.01069		36	5.8032	-3.64113
	36	5.81344	5.99366		36	5.81344	-3.72923
	36	5.82368	6.04251		36	5.82368	-3.7647
	36	5.83392	6.0969		36	5.83392	-3.73034
	36	5.84416	6.09662		36	5.84416	-3.74639
	36	5.8544	6.10719		36	5.8544	-3.76476
	36	5.86464	6.06471		36	5.86464	-3.82246
	36	5.87488	6.02896		36	5.87488	-3.85069
	36	5.88512	5.94464		36	5.88512	-3.91227
	36	5.89536	5.92838		36	5.89536	-3.92778
	36	5.9056	5.97962		36	5.9056	-3.8758
	36	5.91584	5.98849		36	5.91584	-3.90939
	36	5.92608	5.96608		36	5.92608	-3.89976
	36	5.93632	5.88655		36	5.93632	-3.87391
	36	5.94656	5.79855		36	5.94656	-3.85699
	36	5.9568	5.7305		36	5.9568	-3.88204
	36	5.96704	5.73507		36	5.96704	-3.93564
	36	5.97728	5.68559		36	5.97728	-3.99129
	36	5.98752	5.66061		36	5.98752	-3.98533
	36	5.99776	5.66845		36	5.99776	-3.95082
	38	3.50944	0.224609		38	3.50944	0.0716934
	38	3.51968	0.223236		38	3.51968	0.108967
	38	3.52992	0.218399		38	3.52992	0.0895386
	38	3.54016	0.187931		38	3.54016	0.0327225
	38	3.5504	0.212799		38	3.5504	0.00337601
	38	3.56064	0.199043		38	3.56064	0.0216522
	38	3.57088	0.221329		38	3.57088	0.0831642
	38	3.58112	0.224281		38	3.58112	0.0100784
	38	3.59136	0.260719		38	3.59136	0.0215302
	38	3.6016	0.274513		38	3.6016	0.0561028
	38	3.61184	0.266693		38	3.61184	0.0384064
	38	3.62208	0.227432		38	3.62208	0.0435181
	38	3.63232	0.200768		38	3.63232	0.0310669
	38	3.64256	0.198971		38	3.64256	-0.00313187
	38	3.6528	0.1698		38	3.6528	0.00417328
	38	3.66304	0.169731		38	3.66304	0.0722275
	38	3.67328	0.194988		38	3.67328	-0.0217209
	38	3.68352	0.232475		38	3.68352	0.0362015
	38	3.69376	0.228142		38	3.69376	0.0524216
	38	3.704	0.242355		38	3.704	0.0297775
	38	3.71424	0.229675		38	3.71424	0.0177307
	38	3.72448	0.233154		38	3.72448	0.0256348
	38	3.73472	0.229916		38	3.73472	0.0381775
	38	3.74496	0.152725		38	3.74496	0.0427628
	38	3.7552	0.0878143		38	3.7552	0.0716057
	38	3.76544	0.129841		38	3.76544	0.0478096
	38	3.77568	0.0793915		38	3.77568	0.0556526
	38	3.78592	0.14756		38	3.78592	0.104996
	38	3.79616	0.139317		38	3.79616	0.10738
	38	3.8064	0.0787735		38	3.8064	0.123173
	38	3.81664	0.0568962		38	3.81664	0.0714149
	38	3.82688	0.0390015		38	3.82688	0.0193863
	38	3.83712	0.0242615		38	3.83712	0.0289993
	38	3.84736	0.0206833		38	3.84736	0.0712738
	38	3.8576	0.0430908		38	3.8576	0.0989914
	38	3.86784	0.069313		38	3.86784	0.120941
	38	3.87808	0.0743866		38	3.87808	0.0838699
	38	3.88832	0.153152		38	3.88832	0.0563431
	38	3.89856	0.0928879		38	3.89856	-0.063633
	38	3.9088	0.0707245		38	3.9088	-0.00737
	38	3.91904	0.0946045		38	3.91904	0.012722
	38	3.92928	0.10915		38	3.92928	0.0345764
	38	3.93952	0.108456		38	3.93952	0.0608139
	38	3.94976	0.107327		38	3.94976	0.111084
	38	3.96	0.131218		38	3.96	0.221458
	38	3.97024	0.0506058		38	3.97024	0.207817
	38	3.98048	0.0865555		38	3.98048	0.204929
	38	3.99072	0.0862503		38	3.99072	0.247124
	38	4.00096	0.105949		38	4.00096	0.23436
	38	4.0112	0.104858		38	4.0112	0.256805
	38	4.02144	0.0690536		38	4.02144	0.303066
	38	4.03168	0.0230865		38	4.03168	0.243607
	38	4.04192	0.095829		38	4.04192	0.19725
	38	4.05216	0.103054		38	4.05216	0.248444
	38	4.0624	0.112961		38	4.0624	0.281494
	38	4.07264	0.106453		38	4.07264	0.290878
	38	4.08288	0.121979		38	4.08288	0.251907
	38	4.09312	0.115005		38	4.09312	0.24762
	38	4.10336	0.133488		38	4.10336	0.3013
	38	4.1136	0.10046		38	4.1136	0.317341
	38	4.12384	0.104065		38	4.12384	0.219276
	38	4.13408	0.131832		38	4.13408	0.22023
	38	4.14432	0.150879		38	4.14432	0.22744
	38	4.15456	0.153938		38	4.15456	0.212585
	38	4.1648	0.195839		38	4.1648	0.167595
	38	4.17504	0.151169		38	4.17504	0.157352
	38	4.18528	0.155979		38	4.18528	0.103569
	38	4.19552	0.145149		38	4.19552	0.155151
	38	4.20576	0.17049		38	4.20576	0.190536
	38	4.216	0.170193		38	4.216	0.236191
	38	4.22624	0.188126		38	4.22624	0.215828
	38	4.23648	0.192902		38	4.23648	0.178028
	38	4.24672	0.214073		38	4.24672	0.188278
	38	4.25696	0.233875		38	4.25696	0.170815
	38	4.2672	0.268867		38	4.2672	0.16502
	38	4.27744	0.278072		38	4.27744	0.152992
	38	4.28768	0.261139		38	4.28768	0.120323
	38	4.29792	0.219879		38	4.29792	0.0964279
	38	4.30816	0.240768		38	4.30816	0.11145
	38	4.3184	0.207787		38	4.3184	0.141838
	38	4.32864	0.249496		38	4.32864	0.105507
	38	4.33888	0.205009		38	4.33888	0.0537186
	38	4.34912	0.226368		38	4.34912	0.0799904
	38	4.35936	0.21505		38	4.35936	0.177376
	38	4.3696	0.164734		38	4.3696	0.159851
	38	4.37984	0.18272		38	4.37984	0.133011
	38	4.39008	0.198357		38	4.39008	0.108082
	38	4.40032	0.225349		38	4.40032	0.124695
	38	4.41056	0.240467		38	4.41056	0.0806274
	38	4.4208	0.279961		38	4.4208	0.111977
	38	4.43104	0.334129		38	4.43104	0.107185
	38	4.44128	0.305969		38	4.44128	0.146072
	38	4.45152	0.24131		38	4.45152	0.138786
	38	4.46176	0.215637		38	4.46176	0.153461
	38	4.472	0.230301		38	4.472	0.171997
	38	4.48224	0.178406		38	4.48224	0.165138
	38	4.49248	0.148949		38	4.49248	0.121407
	38	4.50272	0.131771		38	4.50272	0.143375
	38	4.51296	0.134617		38	4.51296	0.135193
	38	4.5232	0.11351		38	4.5232	0.126976
	38	4.53344	0.0940056		38	4.53344	0.104183
	38	4.54368	0.0837593		38	4.54368	0.0861969
	38	4.55392	0.104401		38	4.55392	0.0744858
	38	4.56416	0.0778503		38	4.56416	0.0665092
	38	4.5744	0.0320511		38	4.5744	0.00980377
	38	4.58464	0.0347748		38	4.58464	0.00131989
	38	4.59488	-0.0306282		38	4.59488	0.0112457
	38	4.60512	-0.0279312		38	4.60512	-0.0261078
	38	4.61536	0.0252419		38	4.61536	0.00354004
	38	4.6256	0.0133743		38	4.6256	-0.00668335
	38	4.63584	-0.00903702		38	4.63584	-0.0466309
	38	4.64608	0.0496292		38	4.64608	-0.0854225
	38	4.65632	0.0414124		38	4.65632	-0.0618362
	38	4.66656	0.032959		38	4.66656	-0.0924454
	38	4.6768	0.0363617		38	4.6768	-0.0992661
	38	4.68704	0.0228577		38	4.68704	-0.082489
	38	4.69728	-0.00138855		38	4.69728	-0.103432
	38	4.70752	-0.0453873		38	4.70752	-0.113274
	38	4.71776	-0.0589638		38	4.71776	-0.132309
	38	4.728	-0.11731		38	4.728	-0.164421
	38	4.73824	-0.0919571		38	4.73824	-0.161163
	38	4.74848	-0.130566		38	4.74848	-0.155663
	38	4.75872	-0.123306		38	4.75872	-0.119713
	38	4.76896	-0.0610619		38	4.76896	-0.162613
	38	4.7792	-0.0805664		38	4.7792	-0.148216
	38	4.78944	-0.0557251		38	4.78944	-0.130959
	38	4.79968	-0.0642967		38	4.79968	-0.16468
	38	4.80992	-0.0700607		38	4.80992	-0.102016
	38	4.82016	-0.0644035		38	4.82016	-0.143097
	38	4.8304	-0.0688477		38	4.8304	-0.199387
	38	4.84064	-0.0770187		38	4.84064	-0.224586
	38	4.85088	-0.057045		38	4.85088	-0.211727
	38	4.86112	-0.0470619		38	4.86112	-0.246796
	38	4.87136	-0.131088		38	4.87136	-0.291046
	38	4.8816	-0.156471		38	4.8816	-0.296844
	38	4.89184	-0.0619049		38	4.89184	-0.276531
	38	4.90208	-0.0236778		38	4.90208	-0.320606
	38	4.91232	0.0144653		38	4.91232	-0.338306
	38	4.92256	-0.0380936		38	4.92256	-0.345612
	38	4.9328	-0.0290451		38	4.9328	-0.328579
	38	4.94304	0.0647888		38	4.94304	-0.390903
	38	4.95328	0.074192		38	4.95328	-0.468384
	38	4.96352	0.128124		38	4.96352	-0.471352
	38	4.97376	0.192234		38	4.97376	-0.506111
	38	4.984	0.206017		38	4.984	-0.565506
	38	4.99424	0.194859		38	4.99424	-0.58017
	38	5.00448	0.246635		38	5.00448	-0.574165
	38	5.01472	0.227169		38	5.01472	-0.588242
	38	5.02496	0.22673		38	5.02496	-0.595688
	38	5.0352	0.316696		38	5.0352	-0.674606
	38	5.04544	0.352356		38	5.04544	-0.715588
	38	5.05568	0.450836		38	5.05568	-0.711052
	38	5.06592	0.458687		38	5.06592	-0.739784
	38	5.07616	0.494843		38	5.07616	-0.82608
	38	5.0864	0.518738		38	5.0864	-0.854519
	38	5.09664	0.604504		38	5.09664	-0.890961
	38	5.10688	0.734016		38	5.10688	-0.919678
	38	5.11712	0.834679		38	5.11712	-0.931561
	38	5.12736	0.857117		38	5.12736	-0.991985
	38	5.1376	0.885864		38	5.1376	-1.03786
	38	5.14784	0.95776		38	5.14784	-1.14425
	38	5.15808	1.01411		38	5.15808	-1.16868
	38	5.16832	1.09045		38	5.16832	-1.19575
	38	5.17856	1.23923		38	5.17856	-1.17634
	38	5.1888	1.29607		38	5.1888	-1.24389
	38	5.19904	1.37527		38	5.19904	-1.30989
	38	5.20928	1.45356		38	5.20928	-1.32213
	38	5.21952	1.54203		38	5.21952	-1.34168
	38	5.22976	1.67493		38	5.22976	-1.37608
	38	5.24	1.80246		38	5.24	-1.40324
	38	5.25024	1.89517		38	5.25024	-1.50725
	38	5.26048	1.98103		38	5.26048	-1.54779
	38	5.27072	2.08852		38	5.27072	-1.64167
	38	5.28096	2.20876		38	5.28096	-1.71648
	38	5.2912	2.32202		38	5.2912	-1.71743
	38	5.30144	2.40237		38	5.30144	-1.76963
	38	5.31168	2.52864		38	5.31168	-1.8647
	38	5.32192	2.62821		38	5.32192	-1.92147
	38	5.33216	2.71143		38	5.33216	-1.8975
	38	5.3424	2.77573		38	5.3424	-1.96548
	38	5.35264	2.88502		38	5.35264	-2.02461
	38	5.36288	2.92809		38	5.36288	-2.0846
	38	5.37312	3.02773		38	5.37312	-2.09983
	38	5.38336	3.13624		38	5.38336	-2.14698
	38	5.3936	3.21355		38	5.3936	-2.17961
	38	5.40384	3.30619		38	5.40384	-2.22958
	38	5.41408	3.41541		38	5.41408	-2.29781
	38	5.42432	3.46226		38	5.42432	-2.35818
	38	5.43456	3.57801		38	5.43456	-2.42801
	38	5.4448	3.67807		38	5.4448	-2.49445
	38	5.45504	3.78636		38	5.45504	-2.5429
	38	5.46528	3.8319		38	5.46528	-2.64153
	38	5.47552	3.94432		38	5.47552	-2.67675
	38	5.48576	4.06697		38	5.48576	-2.74013
	38	5.496	4.18121		38	5.496	-2.83809
	38	5.50624	4.19701		38	5.50624	-2.94032
	38	5.51648	4.26271		38	5.51648	-2.94344
	38	5.52672	4.34879		38	5.52672	-2.96317
	38	5.53696	4.44769		38	5.53696	-2.91168
	38	5.5472	4.56166		38	5.5472	-2.94437
	38	5.55744	4.62277		38	5.55744	-3.07549
	38	5.56768	4.65958		38	5.56768	-3.16726
	38	5.57792	4.71603		38	5.57792	-3.23183
	38	5.58816	4.79718		38	5.58816	-3.23047
	38	5.5984	4.90134		38	5.5984	-3.18312
	38	5.60864	5.02132		38	5.60864	-3.23577
	38	5.61888	5.11053		38	5.61888	-3.25114
	38	5.62912	5.10789		38	5.62912	-3.20813
	38	5.63936	5.22871		38	5.63936	-3.23827
	38	5.6496	5.24123		38	5.6496	-3.30179
	38	5.65984	5.30091		38	5.65984	-3.32848
	38	5.67008	5.32984		38	5.67008	-3.37189
	38	5.68032	5.36527		38	5.68032	-3.35408
	38	5.69056	5.33667		38	5.69056	-3.34329
	38	5.7008	5.3308		38	5.7008	-3.39598
	38	5.71104	5.41224		38	5.71104	-3.44798
	38	5.72128	5.44141		38	5.72128	-3.42347
	38	5.73152	5.50155		38	5.73152	-3.43809
	38	5.74176	5.51083		38	5.74176	-3.48084
	38	5.752	5.44159		38	5.752	-3.50787
	38	5.76224	5.43164		38	5.76224	-3.49371
	38	5.77248	5.49287		38	5.77248	-3.52591
	38	5.78272	5.47246		38	5.78272	-3.54413
	38	5.79296	5.48395		38	5.79296	-3.54863
	38	5.8032	5.61094		38	5.8032	-3.56869
	38	5.81344	5.61697		38	5.81344	-3.5825
	38	5.82368	5.65508		38	5.82368	-3.59661
	38	5.83392	5.59717		38	5.83392	-3.61977
	38	5.84416	5.58204		38	5.84416	-3.62997
	38	5.8544	5.54558		38	5.8544	-3.56406
	38	5.86464	5.54198		38	5.86464	-3.50495
	38	5.87488	5.50975		38	5.87488	-3.53413
	38	5.88512	5.42751		38	5.88512	-3.4585
	38	5.89536	5.42026		38	5.89536	-3.44539
	38	5.9056	5.40268		38	5.9056	-3.53667
	38	5.91584	5.3788		38	5.91584	-3.57244
	38	5.92608	5.43704		38	5.92608	-3.60857
	38	5.93632	5.4504		38	5.93632	-3.5924
	38	5.94656	5.39		38	5.94656	-3.56744
	38	5.9568	5.3317		38	5.9568	-3.60644
	38	5.96704	5.26955		38	5.96704	-3.65401
	38	5.97728	5.30183		38	5.97728	-3.75203
	38	5.98752	5.19896		38	5.98752	-3.70729
	38	5.99776	5.07445		38	5.99776	-3.70259
	40	3.50944	-0.0642319		40	3.50944	0.0598679
	40	3.51968	-0.129375		40	3.51968	0.120415
	40	3.52992	-0.133106		40	3.52992	0.0965805
	40	3.54016	-0.134598		40	3.54016	0.120888
	40	3.5504	-0.110527		40	3.5504	0.155258
	40	3.56064	-0.115097		40	3.56064	0.117462
	40	3.57088	-0.079174		40	3.57088	0.145355
	40	3.58112	-0.0881882		40	3.58112	0.140011
	40	3.59136	-0.118988		40	3.59136	0.140831
	40	3.6016	-0.13953		40	3.6016	0.190044
	40	3.61184	-0.154682		40	3.61184	0.193264
	40	3.62208	-0.100163		40	3.62208	0.237591
	40	3.63232	-0.0892258		40	3.63232	0.220261
	40	3.64256	-0.0471573		40	3.64256	0.246513
	40	3.6528	-0.0717163		40	3.6528	0.264488
	40	3.66304	-0.0861626		40	3.66304	0.310444
	40	3.67328	-0.0600853		40	3.67328	0.281555
	40	3.68352	-0.066597		40	3.68352	0.305527
	40	3.69376	-0.0490227		40	3.69376	0.270164
	40	3.704	-0.0376282		40	3.704	0.269604
	40	3.71424	-0.0418434		40	3.71424	0.306
	40	3.72448	-0.0488129		40	3.72448	0.344479
	40	3.73472	-0.0435715		40	3.73472	0.292892
	40	3.74496	-0.0464897		40	3.74496	0.244797
	40	3.7552	-0.0119019		40	3.7552	0.168098
	40	3.76544	-0.0454979		40	3.76544	0.226509
	40	3.77568	-0.0372505		40	3.77568	0.243507
	40	3.78592	0.0239944		40	3.78592	0.294983
	40	3.79616	-0.0207062		40	3.79616	0.26828
	40	3.8064	-0.0310287		40	3.8064	0.175995
	40	3.81664	0.0243988		40	3.81664	0.196907
	40	3.82688	0.00280762		40	3.82688	0.222908
	40	3.83712	-0.000831604		40	3.83712	0.173092
	40	3.84736	0.0181503		40	3.84736	0.0904694
	40	3.8576	0.0345001		40	3.8576	0.0807419
	40	3.86784	0.0186157		40	3.86784	0.119194
	40	3.87808	0.0228729		40	3.87808	0.0995903
	40	3.88832	0.0421143		40	3.88832	0.102348
	40	3.89856	0.0784912		40	3.89856	0.0844002
	40	3.9088	0.0616226		40	3.9088	0.0791016
	40	3.91904	0.0653877		40	3.91904	0.106941
	40	3.92928	0.0729103		40	3.92928	0.156654
	40	3.93952	0.0701752		40	3.93952	0.158379
	40	3.94976	0.0234833		40	3.94976	0.14994
	40	3.96	-0.0143738		40	3.96	0.206276
	40	3.97024	-0.00902176		40	3.97024	0.210892
	40	3.98048	0.0118256		40	3.98048	0.278786
	40	3.99072	0.0138206		40	3.99072	0.266575
	40	4.00096	0.0672531		40	4.00096	0.232708
	40	4.0112	0.112675		40	4.0112	0.230717
	40	4.02144	0.0645447		40	4.02144	0.273041
	40	4.03168	0.0255089		40	4.03168	0.28397
	40	4.04192	-0.0414581		40	4.04192	0.261616
	40	4.05216	-0.0701981		40	4.05216	0.249535
	40	4.0624	-0.0794373		40	4.0624	0.255211
	40	4.07264	-0.0832977		40	4.07264	0.275875
	40	4.08288	-0.0664291		40	4.08288	0.273315
	40	4.09312	-0.0701752		40	4.09312	0.270485
	40	4.10336	-0.0719299		40	4.10336	0.308502
	40	4.1136	-0.0917435		40	4.1136	0.334572
	40	4.12384	-0.126671		40	4.12384	0.253105
	40	4.13408	-0.0828667		40	4.13408	0.259041
	40	4.14432	-0.0704575		40	4.14432	0.259453
	40	4.15456	-0.0404053		40	4.15456	0.205185
	40	4.1648	0.0265579		40	4.1648	0.221455
	40	4.17504	0.042881		40	4.17504	0.255577
	40	4.18528	-0.043972		40	4.18528	0.214832
	40	4.19552	-0.0679855		40	4.19552	0.229248
	40	4.20576	-0.0759659		40	4.20576	0.245926
	40	4.216	-0.082283		40	4.216	0.254753
	40	4.22624	-0.0483932		40	4.22624	0.206181
	40	4.23648	-0.0182114		40	4.23648	0.194729
	40	4.24672	-0.0541382		40	4.24672	0.196224
	40	4.25696	-0.0477638		40	4.25696	0.210175
	40	4.2672	-0.0631638		40	4.2672	0.235542
	40	4.27744	-0.013279		40	4.27744	0.202648
	40	4.28768	0.00556183		40	4.28768	0.193802
	40	4.29792	0.0199089		40	4.29792	0.255043
	40	4.30816	0.0630569		40	4.30816	0.204266
	40	4.3184	0.0695496		40	4.3184	0.190067
	40	4.32864	0.0752831		40	4.32864	0.240501
	40	4.33888	0.0288048		40	4.33888	0.213451
	40	4.34912	0.000152588		40	4.34912	0.220276
	40	4.35936	-0.0321808		40	4.35936	0.232029
	40	4.3696	-0.0230255		40	4.3696	0.118523
	40	4.37984	-0.0348358		40	4.37984	0.117683
	40	4.39008	-0.0746574		40	4.39008	0.107754
	40	4.40032	-0.109669		40	4.40032	0.104832
	40	4.41056	-0.0931778		40	4.41056	0.126183
	40	4.4208	-0.10527		40	4.4208	0.119286
	40	4.43104	-0.054554		40	4.43104	0.14035
	40	4.44128	-0.0631256		40	4.44128	0.132584
	40	4.45152	-0.103821		40	4.45152	0.0998726
	40	4.46176	-0.117191		40	4.46176	0.0363464
	40	4.472	-0.0462837		40	4.472	0.0487137
	40	4.48224	-0.0517693		40	4.48224	0.0447807
	40	4.49248	-0.0986595		40	4.49248	0.0104065
	40	4.50272	-0.149918		40	4.50272	0.0722656
	40	4.51296	-0.131081		40	4.51296	0.0730286
	40	4.5232	-0.103001		40	4.5232	0.0305138
	40	4.53344	-0.0826683		40	4.53344	-0.0220871
	40	4.54368	-0.042942		40	4.54368	0.0164261
	40	4.55392	-0.0600815		40	4.55392	-0.0172348
	40	4.56416	-0.062561		40	4.56416	-0.0241432
	40	4.5744	-0.0774078		40	4.5744	0.00423431
	40	4.58464	-0.0683594		40	4.58464	0.00590134
	40	4.59488	-0.0225372		40	4.59488	-0.0469742
	40	4.60512	-0.0275269		40	4.60512	-0.0606918
	40	4.61536	-0.0804062		40	4.61536	-0.0579643
	40	4.6256	-0.0840912		40	4.6256	-0.121353
	40	4.63584	-0.0497742		40	4.63584	-0.125656
	40	4.64608	-0.0143814		40	4.64608	-0.0630112
	40	4.65632	0.0360451		40	4.65632	-0.0014534
	40	4.66656	-0.00419998		40	4.66656	-0.0020256
	40	4.6768	-0.0226135		40	4.6768	-0.0576019
	40	4.68704	-0.0190811		40	4.68704	-0.0906639
	40	4.69728	-0.0140152		40	4.69728	-0.0436172
	40	4.70752	0.0430603		40	4.70752	-0.0367661
	40	4.71776	0.0149803		40	4.71776	-0.0620537
	40	4.728	-0.00809479		40	4.728	-0.0615921
	40	4.73824	-0.0405655		40	4.73824	-0.108887
	40	4.74848	-0.0380478		40	4.74848	-0.0749168
	40	4.75872	-0.0390091		40	4.75872	-0.141212
	40	4.76896	-0.073349		40	4.76896	-0.114708
	40	4.7792	-0.056488		40	4.7792	-0.0985489
	40	4.78944	-0.0029335		40	4.78944	-0.12912
	40	4.79968	0.003479		40	4.79968	-0.178185
	40	4.80992	0.0127106		40	4.80992	-0.19883
	40	4.82016	0.0386925		40	4.82016	-0.192169
	40	4.8304	0.0391998		40	4.8304	-0.142502
	40	4.84064	0.0210648		40	4.84064	-0.206802
	40	4.85088	0.0474358		40	4.85088	-0.32579
	40	4.86112	0.083847		40	4.86112	-0.31501
	40	4.87136	0.113533		40	4.87136	-0.346336
	40	4.8816	0.140846		40	4.8816	-0.306988
	40	4.89184	0.118652		40	4.89184	-0.373775
	40	4.90208	0.0668678		40	4.90208	-0.332619
	40	4.91232	0.107422		40	4.91232	-0.333275
	40	4.92256	0.140842		40	4.92256	-0.43354
	40	4.9328	0.152966		40	4.9328	-0.444328
	40	4.94304	0.176811		40	4.94304	-0.436054
	40	4.95328	0.190594		40	4.95328	-0.464535
	40	4.96352	0.254337		40	4.96352	-0.558655
	40	4.97376	0.280247		40	4.97376	-0.6772
	40	4.984	0.314411		40	4.984	-0.782742
	40	4.99424	0.300484		40	4.99424	-0.821091
	40	5.00448	0.350014		40	5.00448	-0.860756
	40	5.01472	0.390694		40	5.01472	-0.919365
	40	5.02496	0.406273		40	5.02496	-0.918488
	40	5.0352	0.525997		40	5.0352	-1.01979
	40	5.04544	0.542641		40	5.04544	-1.11053
	40	5.05568	0.55233		40	5.05568	-1.19636
	40	5.06592	0.572296		40	5.06592	-1.17723
	40	5.07616	0.621666		40	5.07616	-1.22849
	40	5.0864	0.743366		40	5.0864	-1.29328
	40	5.09664	0.795563		40	5.09664	-1.39098
	40	5.10688	0.832687		40	5.10688	-1.44448
	40	5.11712	0.916859		40	5.11712	-1.44291
	40	5.12736	1.01094		40	5.12736	-1.43143
	40	5.1376	1.06332		40	5.1376	-1.49738
	40	5.14784	1.10014		40	5.14784	-1.54198
	40	5.15808	1.18781		40	5.15808	-1.62415
	40	5.16832	1.2843		40	5.16832	-1.71879
	40	5.17856	1.33494		40	5.17856	-1.82475
	40	5.1888	1.42287		40	5.1888	-1.87634
	40	5.19904	1.49305		40	5.19904	-1.98135
	40	5.20928	1.5661		40	5.20928	-2.086
	40	5.21952	1.6276		40	5.21952	-2.11185
	40	5.22976	1.69155		40	5.22976	-2.18029
	40	5.24	1.71144		40	5.24	-2.29022
	40	5.25024	1.80942		40	5.25024	-2.37266
	40	5.26048	1.88698		40	5.26048	-2.35418
	40	5.27072	1.91656		40	5.27072	-2.39606
	40	5.28096	2.01266		40	5.28096	-2.46959
	40	5.2912	2.08178		40	5.2912	-2.56623
	40	5.30144	2.17844		40	5.30144	-2.58586
	40	5.31168	2.27488		40	5.31168	-2.71142
	40	5.32192	2.38333		40	5.32192	-2.74209
	40	5.33216	2.41483		40	5.33216	-2.78074
	40	5.3424	2.48089		40	5.3424	-2.79214
	40	5.35264	2.5981		40	5.35264	-2.86076
	40	5.36288	2.66503		40	5.36288	-2.93886
	40	5.37312	2.77078		40	5.37312	-2.92052
	40	5.38336	2.86083		40	5.38336	-2.89347
	40	5.3936	3.0401		40	5.3936	-2.99007
	40	5.40384	3.14147		40	5.40384	-3.10525
	40	5.41408	3.259		40	5.41408	-3.20941
	40	5.42432	3.33788		40	5.42432	-3.2865
	40	5.43456	3.27594		40	5.43456	-3.30305
	40	5.4448	3.31927		40	5.4448	-3.32695
	40	5.45504	3.39123		40	5.45504	-3.34982
	40	5.46528	3.48139		40	5.46528	-3.37623
	40	5.47552	3.57838		40	5.47552	-3.46642
	40	5.48576	3.65466		40	5.48576	-3.5659
	40	5.496	3.79345		40	5.496	-3.60858
	40	5.50624	3.8809		40	5.50624	-3.6452
	40	5.51648	3.93893		40	5.51648	-3.69892
	40	5.52672	4.00313		40	5.52672	-3.77136
	40	5.53696	4.06745		40	5.53696	-3.75861
	40	5.5472	4.11262		40	5.5472	-3.8422
	40	5.55744	4.1806		40	5.55744	-3.80055
	40	5.56768	4.2793		40	5.56768	-3.75089
	40	5.57792	4.36731		40	5.57792	-3.7817
	40	5.58816	4.4925		40	5.58816	-3.88309
	40	5.5984	4.61208		40	5.5984	-3.93062
	40	5.60864	4.63002		40	5.60864	-3.98457
	40	5.61888	4.68277		40	5.61888	-4.05146
	40	5.62912	4.67019		40	5.62912	-4.06673
	40	5.63936	4.75217		40	5.63936	-4.14639
	40	5.6496	4.85798		40	5.6496	-4.16915
	40	5.65984	4.88006		40	5.65984	-4.16263
	40	5.67008	4.84737		40	5.67008	-4.18144
	40	5.68032	4.86889		40	5.68032	-4.23692
	40	5.69056	4.8485		40	5.69056	-4.24447
	40	5.7008	4.85079		40	5.7008	-4.2914
	40	5.71104	4.87165		40	5.71104	-4.33937
	40	5.72128	4.89321		40	5.72128	-4.27854
	40	5.73152	4.89304		40	5.73152	-4.30326
	40	5.74176	4.94372		40	5.74176	-4.33209
	40	5.752	5.01445		40	5.752	-4.33031
	40	5.76224	5.07699		40	5.76224	-4.34286
	40	5.77248	5.02666		40	5.77248	-4.32755
	40	5.78272	4.90111		40	5.78272	-4.36833
	40	5.79296	4.83038		40	5.79296	-4.43866
	40	5.8032	4.85224		40	5.8032	-4.4714
	40	5.81344	4.92421		40	5.81344	-4.4294
	40	5.82368	4.89585		40	5.82368	-4.40634
	40	5.83392	4.88237		40	5.83392	-4.49017
	40	5.84416	4.85921		40	5.84416	-4.51648
	40	5.8544	4.85618		40	5.8544	-4.49946
	40	5.86464	4.83212		40	5.86464	-4.5187
	40	5.87488	4.76486		40	5.87488	-4.54776
	40	5.88512	4.72909		40	5.88512	-4.55619
	40	5.89536	4.72367		40	5.89536	-4.50959
	40	5.9056	4.71712		40	5.9056	-4.5896
	40	5.91584	4.60255		40	5.91584	-4.64536
	40	5.92608	4.5235		40	5.92608	-4.63962
	40	5.93632	4.5295		40	5.93632	-4.57936
	40	5.94656	4.52905		40	5.94656	-4.49075
	40	5.9568	4.6151		40	5.9568	-4.52196
	40	5.96704	4.61744		40	5.96704	-4.59319
	40	5.97728	4.50267		40	5.97728	-4.72729
	40	5.98752	4.40557		40	5.98752	-4.68603
	40	5.99776	4.57811		40	5.99776	-4.69085
	42	3.50944	0.0536575		42	3.50944	-0.387329
	42	3.51968	-0.0242004		42	3.51968	-0.357384
	42	3.52992	-0.0622635		42	3.52992	-0.364433
	42	3.54016	-0.0712051		42	3.54016	-0.376736
	42	3.5504	-0.0110512		42	3.5504	-0.358215
	42	3.56064	-0.0196686		42	3.56064	-0.336823
	42	3.57088	-0.0205956		42	3.57088	-0.270775
	42	3.58112	-0.00850677		42	3.58112	-0.279579
	42	3.59136	0.0221672		42	3.59136	-0.280212
	42	3.6016	-0.00759888		42	3.6016	-0.245235
	42	3.61184	0.0291977		42	3.61184	-0.215191
	42	3.62208	0.0625763		42	3.62208	-0.189369
	42	3.63232	0.0201302		42	3.63232	-0.165474
	42	3.64256	0.0259933		42	3.64256	-0.21402
	42	3.6528	0.0393257		42	3.6528	-0.204887
	42	3.66304	0.0613365		42	3.66304	-0.242733
	42	3.67328	0.0707626		42	3.67328	-0.157722
	42	3.68352	0.0728607		42	3.68352	-0.0934372
	42	3.69376	0.0538864		42	3.69376	-0.116604
	42	3.704	0.0686798		42	3.704	-0.0991821
	42	3.71424	0.0231857		42	3.71424	-0.0521927
	42	3.72448	0.0467453		42	3.72448	-0.0320053
	42	3.73472	0.0756836		42	3.73472	0.0161324
	42	3.74496	0.123058		42	3.74496	0.00565338
	42	3.7552	0.0949326		42	3.7552	0.0154991
	42	3.76544	0.0317688		42	3.76544	0.0603256
	42	3.77568	0.0376053		42	3.77568	0.0562057
	42	3.78592	0.0647697		42	3.78592	0.0185318
	42	3.79616	0.0932007		42	3.79616	0.0492172
	42	3.8064	0.0737991		42	3.8064	-0.00582886
	42	3.81664	0.0695343		42	3.81664	0.00242615
	42	3.82688	0.115913		42	3.82688	0.0679398
	42	3.83712	0.140614		42	3.83712	0.0401154
	42	3.84736	0.124775		42	3.84736	0.0646057
	42	3.8576	0.150002		42	3.8576	0.106651
	42	3.86784	0.12455		42	3.86784	0.13195
	42	3.87808	0.148705		42	3.87808	0.125256
	42	3.88832	0.192596		42	3.88832	0.0902557
	42	3.89856	0.166306		42	3.89856	0.123878
	42	3.9088	0.114571		42	3.9088	0.200912
	42	3.91904	0.129585		42	3.91904	0.200417
	42	3.92928	0.153336		42	3.92928	0.248955
	42	3.93952	0.228428		42	3.93952	0.245029
	42	3.94976	0.261787		42	3.94976	0.309967
	42	3.96	0.220436		42	3.96	0.310989
	42	3.97024	0.142185		42	3.97024	0.349571
	42	3.98048	0.1959		42	3.98048	0.433781
	42	3.99072	0.219963		42	3.99072	0.481873
	42	4.00096	0.299889		42	4.00096	0.529945
	42	4.0112	0.316486		42	4.0112	0.481598
	42	4.02144	0.305889		42	4.02144	0.511948
	42	4.03168	0.326878		42	4.03168	0.589005
	42	4.04192	0.337807		42	4.04192	0.629211
	42	4.05216	0.41153		42	4.05216	0.660439
	42	4.0624	0.429737		42	4.0624	0.6642
	42	4.07264	0.376171		42	4.07264	0.647644
	42	4.08288	0.340508		42	4.08288	0.635437
	42	4.09312	0.366146		42	4.09312	0.608585
	42	4.10336	0.281658		42	4.10336	0.582855
	42	4.1136	0.280457		42	4.1136	0.618095
	42	4.12384	0.247925		42	4.12384	0.63121
	42	4.13408	0.251457		42	4.13408	0.631203
	42	4.14432	0.228752		42	4.14432	0.665222
	42	4.15456	0.191124		42	4.15456	0.645
	42	4.1648	0.181877		42	4.1648	0.614128
	42	4.17504	0.208351		42	4.17504	0.592758
	42	4.18528	0.21513		42	4.18528	0.61602
	42	4.19552	0.207066		42	4.19552	0.632477
	42	4.20576	0.18718		42	4.20576	0.604645
	42	4.216	0.15221		42	4.216	0.587334
	42	4.22624	0.163284		42	4.22624	0.563904
	42	4.23648	0.153664		42	4.23648	0.53717
	42	4.24672	0.165428		42	4.24672	0.525425
	42	4.25696	0.153908		42	4.25696	0.574844
	42	4.2672	0.0992203		42	4.2672	0.520355
	42	4.27744	0.105019		42	4.27744	0.470543
	42	4.28768	0.100708		42	4.28768	0.455719
	42	4.29792	0.116241		42	4.29792	0.478287
	42	4.30816	0.069313		42	4.30816	0.496204
	42	4.3184	0.0105324		42	4.3184	0.472862
	42	4.32864	0.0135193		42	4.32864	0.453102
	42	4.33888	0.0135422		42	4.33888	0.48542
	42	4.34912	-0.0849838		42	4.34912	0.46677
	42	4.35936	-0.0458183		42	4.35936	0.469704
	42	4.3696	-0.0544281		42	4.3696	0.425072
	42	4.37984	-0.0582161		42	4.37984	0.415081
	42	4.39008	0.00609589		42	4.39008	0.337769
	42	4.40032	0.0244675		42	4.40032	0.305511
	42	4.41056	-0.00030899		42	4.41056	0.327946
	42	4.4208	0.00679398		42	4.4208	0.304596
	42	4.43104	0.0507278		42	4.43104	0.287106
	42	4.44128	0.0326042		42	4.44128	0.293217
	42	4.45152	-0.00443268		42	4.45152	0.334389
	42	4.46176	-0.0596771		42	4.46176	0.301659
	42	4.472	-0.0906219		42	4.472	0.2812
	42	4.48224	-0.0867767		42	4.48224	0.295036
	42	4.49248	-0.0508194		42	4.49248	0.246941
	42	4.50272	-0.0754166		42	4.50272	0.263344
	42	4.51296	-0.063961		42	4.51296	0.228676
	42	4.5232	-0.0617447		42	4.5232	0.214447
	42	4.53344	-0.0749054		42	4.53344	0.196381
	42	4.54368	-0.152767		42	4.54368	0.13562
	42	4.55392	-0.188793		42	4.55392	0.14484
	42	4.56416	-0.148224		42	4.56416	0.222031
	42	4.5744	-0.142593		42	4.5744	0.182663
	42	4.58464	-0.101288		42	4.58464	0.171371
	42	4.59488	-0.0682602		42	4.59488	0.157089
	42	4.60512	-0.107258		42	4.60512	0.145058
	42	4.61536	-0.127804		42	4.61536	0.113388
	42	4.6256	-0.129799		42	4.6256	0.158371
	42	4.63584	-0.118084		42	4.63584	0.159348
	42	4.64608	-0.111801		42	4.64608	0.149719
	42	4.65632	-0.126358		42	4.65632	0.158615
	42	4.66656	-0.136719		42	4.66656	0.147125
	42	4.6768	-0.21949		42	4.6768	0.110073
	42	4.68704	-0.20433		42	4.68704	0.110527
	42	4.69728	-0.197113		42	4.69728	0.154636
	42	4.70752	-0.208248		42	4.70752	0.167473
	42	4.71776	-0.166595		42	4.71776	0.127472
	42	4.728	-0.174171		42	4.728	0.0574722
	42	4.73824	-0.106342		42	4.73824	0.059227
	42	4.74848	-0.16568		42	4.74848	0.0406418
	42	4.75872	-0.138229		42	4.75872	-0.043129
	42	4.76896	-0.136829		42	4.76896	-0.0285378
	42	4.7792	-0.127434		42	4.7792	-0.0342178
	42	4.78944	-0.193127		42	4.78944	-0.0698662
	42	4.79968	-0.168083		42	4.79968	-0.075592
	42	4.80992	-0.153431		42	4.80992	-0.0901642
	42	4.82016	-0.10778		42	4.82016	-0.110321
	42	4.8304	-0.0815163		42	4.8304	-0.122772
	42	4.84064	-0.0174484		42	4.84064	-0.179977
	42	4.85088	-0.0115738		42	4.85088	-0.155773
	42	4.86112	-0.0461235		42	4.86112	-0.185555
	42	4.87136	-0.0690918		42	4.87136	-0.199883
	42	4.8816	-0.0740204		42	4.8816	-0.23761
	42	4.89184	-0.106758		42	4.89184	-0.271797
	42	4.90208	-0.0955276		42	4.90208	-0.287155
	42	4.91232	-0.0516663		42	4.91232	-0.302837
	42	4.92256	0.00510025		42	4.92256	-0.382767
	42	4.9328	-0.00063324		42	4.9328	-0.405014
	42	4.94304	0.0754776		42	4.94304	-0.401688
	42	4.95328	0.174797		42	4.95328	-0.4548
	42	4.96352	0.188351		42	4.96352	-0.528763
	42	4.97376	0.204182		42	4.97376	-0.547684
	42	4.984	0.218857		42	4.984	-0.639702
	42	4.99424	0.290249		42	4.99424	-0.677849
	42	5.00448	0.412685		42	5.00448	-0.700241
	42	5.01472	0.418243		42	5.01472	-0.781013
	42	5.02496	0.465004		42	5.02496	-0.776253
	42	5.0352	0.589405		42	5.0352	-0.910049
	42	5.04544	0.694191		42	5.04544	-0.962181
	42	5.05568	0.745476		42	5.05568	-0.956669
	42	5.06592	0.763176		42	5.06592	-1.01248
	42	5.07616	0.774124		42	5.07616	-1.08303
	42	5.0864	0.804829		42	5.0864	-1.17642
	42	5.09664	0.887123		42	5.09664	-1.22128
	42	5.10688	0.961586		42	5.10688	-1.27142
	42	5.11712	1.03427		42	5.11712	-1.33103
	42	5.12736	1.14143		42	5.12736	-1.39981
	42	5.1376	1.29054		42	5.1376	-1.49521
	42	5.14784	1.32571		42	5.14784	-1.50728
	42	5.15808	1.43881		42	5.15808	-1.57365
	42	5.16832	1.45055		42	5.16832	-1.66986
	42	5.17856	1.4907		42	5.17856	-1.79229
	42	5.1888	1.6799		42	5.1888	-1.86568
	42	5.19904	1.73889		42	5.19904	-1.93797
	42	5.20928	1.81938		42	5.20928	-1.9985
	42	5.21952	1.96288		42	5.21952	-2.01917
	42	5.22976	2.05982		42	5.22976	-2.0689
	42	5.24	2.10677		42	5.24	-2.12364
	42	5.25024	2.16412		42	5.25024	-2.25259
	42	5.26048	2.27322		42	5.26048	-2.3484
	42	5.27072	2.3756		42	5.27072	-2.4021
	42	5.28096	2.4395		42	5.28096	-2.43155
	42	5.2912	2.48802		42	5.2912	-2.38692
	42	5.30144	2.59833		42	5.30144	-2.48889
	42	5.31168	2.73744		42	5.31168	-2.5797
	42	5.32192	2.84406		42	5.32192	-2.62664
	42	5.33216	2.94204		42	5.33216	-2.65449
	42	5.3424	3.01314		42	5.3424	-2.76138
	42	5.35264	3.07714		42	5.35264	-2.85678
	42	5.36288	3.13353		42	5.36288	-2.97456
	42	5.37312	3.25405		42	5.37312	-3.06813
	42	5.38336	3.29438		42	5.38336	-3.11747
	42	5.3936	3.35085		42	5.3936	-3.12189
	42	5.40384	3.42809		42	5.40384	-3.12579
	42	5.41408	3.5078		42	5.41408	-3.24042
	42	5.42432	3.53892		42	5.42432	-3.36355
	42	5.43456	3.67626		42	5.43456	-3.33058
	42	5.4448	3.80418		42	5.4448	-3.30079
	42	5.45504	3.93906		42	5.45504	-3.31192
	42	5.46528	4.0497		42	5.46528	-3.38768
	42	5.47552	4.10764		42	5.47552	-3.46079
	42	5.48576	4.12748		42	5.48576	-3.53657
	42	5.496	4.21866		42	5.496	-3.5448
	42	5.50624	4.35677		42	5.50624	-3.56742
	42	5.51648	4.43118		42	5.51648	-3.61878
	42	5.52672	4.54842		42	5.52672	-3.63763
	42	5.53696	4.59561		42	5.53696	-3.67731
	42	5.5472	4.64984		42	5.5472	-3.80207
	42	5.55744	4.64872		42	5.55744	-3.88193
	42	5.56768	4.75809		42	5.56768	-3.925
	42	5.57792	4.86724		42	5.57792	-3.92517
	42	5.58816	4.95042		42	5.58816	-3.93845
	42	5.5984	4.98779		42	5.5984	-3.99014
	42	5.60864	4.99198		42	5.60864	-4.01024
	42	5.61888	5.06496		42	5.61888	-4.05998
	42	5.62912	5.11718		42	5.62912	-4.01371
	42	5.63936	5.19739		42	5.63936	-4.01018
	42	5.6496	5.30108		42	5.6496	-4.03483
	42	5.65984	5.35102		42	5.65984	-4.02236
	42	5.67008	5.44574		42	5.67008	-4.06159
	42	5.68032	5.52984		42	5.68032	-4.09259
	42	5.69056	5.54744		42	5.69056	-4.17199
	42	5.7008	5.55719		42	5.7008	-4.16597
	42	5.71104	5.63544		42	5.71104	-4.15266
	42	5.72128	5.66228		42	5.72128	-4.25013
	42	5.73152	5.67782		42	5.73152	-4.1977
	42	5.74176	5.68377		42	5.74176	-4.2342
	42	5.752	5.73343		42	5.752	-4.19408
	42	5.76224	5.7542		42	5.76224	-4.175
	42	5.77248	5.8614		42	5.77248	-4.32252
	42	5.78272	5.94849		42	5.78272	-4.37192
	42	5.79296	5.9531		42	5.79296	-4.33736
	42	5.8032	5.94036		42	5.8032	-4.35233
	42	5.81344	5.96197		42	5.81344	-4.44923
	42	5.82368	6.01782		42	5.82368	-4.52056
	42	5.83392	6.04829		42	5.83392	-4.51753
	42	5.84416	6.114		42	5.84416	-4.494
	42	5.8544	6.10325		42	5.8544	-4.48817
	42	5.86464	6.11662		42	5.86464	-4.41368
	42	5.87488	6.15942		42	5.87488	-4.4674
	42	5.88512	6.09057		42	5.88512	-4.48941
	42	5.89536	6.08624		42	5.89536	-4.51908
	42	5.9056	6.07891		42	5.9056	-4.59254
	42	5.91584	6.05592		42	5.91584	-4.58934
	42	5.92608	5.94608		42	5.92608	-4.56527
	42	5.93632	5.969		42	5.93632	-4.5526
	42	5.94656	5.95578		42	5.94656	-4.53894
	42	5.9568	5.95689		42	5.9568	-4.50316
	42	5.96704	5.98228		42	5.96704	-4.50863
	42	5.97728	5.91781		42	5.97728	-4.53204
	42	5.98752	5.85976		42	5.98752	-4.56776
	42	5.99776	5.83963		42	5.99776	-4.67628
	44	3.50944	-0.632008		44	3.50944	0.116596
	44	3.51968	-0.641495		44	3.51968	0.0533371
	44	3.52992	-0.679092		44	3.52992	0.100761
	44	3.54016	-0.681385		44	3.54016	0.171005
	44	3.5504	-0.67337		44	3.5504	0.123856
	44	3.56064	-0.67347		44	3.56064	0.12006
	44	3.57088	-0.710262		44	3.57088	0.0718117
	44	3.58112	-0.709953		44	3.58112	0.0750198
	44	3.59136	-0.732399		44	3.59136	0.0755997
	44	3.6016	-0.726887		44	3.6016	0.111023
	44	3.61184	-0.760345		44	3.61184	0.0574493
	44	3.62208	-0.751587		44	3.62208	0.101562
	44	3.63232	-0.766121		44	3.63232	0.118031
	44	3.64256	-0.733849		44	3.64256	0.0790939
	44	3.6528	-0.734844		44	3.6528	0.0943909
	44	3.66304	-0.694519		44	3.66304	0.121742
	44	3.67328	-0.648643		44	3.67328	0.114845
	44	3.68352	-0.568737		44	3.68352	0.109856
	44	3.69376	-0.561577		44	3.69376	0.0986862
	44	3.704	-0.622047		44	3.704	0.126457
	44	3.71424	-0.592854		44	3.71424	0.106842
	44	3.72448	-0.617493		44	3.72448	0.112961
	44	3.73472	-0.597481		44	3.73472	0.0736771
	44	3.74496	-0.563957		44	3.74496	0.0808105
	44	3.7552	-0.521591		44	3.7552	0.121056
	44	3.76544	-0.629456		44	3.76544	0.178024
	44	3.77568	-0.631958		44	3.77568	0.14212
	44	3.78592	-0.60487		44	3.78592	0.0687256
	44	3.79616	-0.49789		44	3.79616	0.0879326
	44	3.8064	-0.503475		44	3.8064	0.0919189
	44	3.81664	-0.508194		44	3.81664	0.0749207
	44	3.82688	-0.470268		44	3.82688	0.0871277
	44	3.83712	-0.482388		44	3.83712	0.067749
	44	3.84736	-0.557274		44	3.84736	0.103798
	44	3.8576	-0.46402		44	3.8576	0.110146
	44	3.86784	-0.381996		44	3.86784	0.168198
	44	3.87808	-0.357651		44	3.87808	0.217812
	44	3.88832	-0.384262		44	3.88832	0.213982
	44	3.89856	-0.412926		44	3.89856	0.17775
	44	3.9088	-0.422543		44	3.9088	0.204472
	44	3.91904	-0.436363		44	3.91904	0.262871
	44	3.92928	-0.429535		44	3.92928	0.283638
	44	3.93952	-0.363976		44	3.93952	0.342636
	44	3.94976	-0.362053		44	3.94976	0.395554
	44	3.96	-0.341465		44	3.96	0.412395
	44	3.97024	-0.324322		44	3.97024	0.419838
[truncated: 2,150 more rows]

## Sheet: panel G
	Ipsi				Contra				Ipsi			Contra
	Sound intensity (dB)	Time (ms)	Vm rel (mV)		Sound intensity (dB)	Time (ms)	Vm rel (mV)		Sound intensity (dB SPL)	Latency (ms)		Sound intensity (dB SPL)	Latency (ms)
	10	3.50944	0.10096		10	3.50944	-0.0555305		10	4.984		10	4.74848
	10	3.51968	0.0758591		10	3.51968	-0.0230751		20	4.85088		20	4.54368
	10	3.52992	0.0101776		10	3.52992	-0.0431099		30	4.7792		30	4.50272
	10	3.54016	0.051342		10	3.54016	-0.063694		40	4.68704		40	4.44128
	10	3.5504	0.118294		10	3.5504	-0.0765572
	10	3.56064	0.0541458		10	3.56064	-0.0524597
	10	3.57088	0.00393295		10	3.57088	-0.0552711
	10	3.58112	-0.0768204		10	3.58112	0.0246391
	10	3.59136	-0.156914		10	3.59136	0.0272446
	10	3.6016	-0.135712		10	3.6016	0.0443039
	10	3.61184	-0.0999451		10	3.61184	0.0329323
	10	3.62208	-0.0356064		10	3.62208	0.0545082
	10	3.63232	-0.0928879		10	3.63232	0.0560188
	10	3.64256	-0.128006		10	3.64256	-0.019783
	10	3.6528	-0.0858307		10	3.6528	-0.0797386
	10	3.66304	-0.00284195		10	3.66304	-0.0583725
	10	3.67328	-0.010704		10	3.67328	-0.0497398
	10	3.68352	-0.0160522		10	3.68352	-0.0913658
	10	3.69376	-0.0463791		10	3.69376	-0.129391
	10	3.704	0.00658417		10	3.704	-0.110584
	10	3.71424	-0.00963974		10	3.71424	-0.0947456
	10	3.72448	-0.025856		10	3.72448	-0.16856
	10	3.73472	0.0174484		10	3.73472	-0.142719
	10	3.74496	-0.00281906		10	3.74496	-0.030304
	10	3.7552	-0.0424194		10	3.7552	0.0271263
	10	3.76544	-0.114834		10	3.76544	0.121426
	10	3.77568	-0.0721817		10	3.77568	0.107662
	10	3.78592	-0.0817642		10	3.78592	0.0733757
	10	3.79616	-0.103073		10	3.79616	0.0400276
	10	3.8064	-0.0370636		10	3.8064	0.132793
	10	3.81664	0.119141		10	3.81664	0.160183
	10	3.82688	0.195206		10	3.82688	0.11409
	10	3.83712	0.142647		10	3.83712	0.0663872
	10	3.84736	0.0978088		10	3.84736	0.0443001
	10	3.8576	-0.00462341		10	3.8576	0.0525818
	10	3.86784	0.0339737		10	3.86784	0.0155373
	10	3.87808	0.0918427		10	3.87808	-0.0258904
	10	3.88832	0.0706253		10	3.88832	-0.0291824
	10	3.89856	0.0445709		10	3.89856	-0.0592308
	10	3.9088	0.0556335		10	3.9088	-0.0712395
	10	3.91904	0.130474		10	3.91904	-0.0771294
	10	3.92928	0.0847702		10	3.92928	-0.0424385
	10	3.93952	0.113495		10	3.93952	-0.0125351
	10	3.94976	0.164925		10	3.94976	-0.0023613
	10	3.96	0.184448		10	3.96	-0.0235939
	10	3.97024	0.179977		10	3.97024	-0.0673485
	10	3.98048	0.197563		10	3.98048	-0.0571136
	10	3.99072	0.252014		10	3.99072	0.0056572
	10	4.00096	0.260941		10	4.00096	0.0109291
	10	4.0112	0.165028		10	4.0112	-0.000545502
	10	4.02144	0.173012		10	4.02144	0.111282
	10	4.03168	0.153465		10	4.03168	0.191784
	10	4.04192	0.151657		10	4.04192	0.31609
	10	4.05216	0.156593		10	4.05216	0.351406
	10	4.0624	0.0932083		10	4.0624	0.341656
	10	4.07264	0.0681458		10	4.07264	0.315922
	10	4.08288	0.0717392		10	4.08288	0.329433
	10	4.09312	0.0459366		10	4.09312	0.35939
	10	4.10336	0.00656128		10	4.10336	0.395226
	10	4.1136	0.0493584		10	4.1136	0.45583
	10	4.12384	-0.026989		10	4.12384	0.483181
	10	4.13408	-0.0307503		10	4.13408	0.522316
	10	4.14432	-0.0777512		10	4.14432	0.497562
	10	4.15456	-0.0987053		10	4.15456	0.41563
	10	4.1648	-0.0268593		10	4.1648	0.407787
	10	4.17504	0.0857353		10	4.17504	0.372295
	10	4.18528	0.205761		10	4.18528	0.442402
	10	4.19552	0.21666		10	4.19552	0.465034
	10	4.20576	0.188942		10	4.20576	0.391926
	10	4.216	0.178974		10	4.216	0.406231
	10	4.22624	0.119835		10	4.22624	0.359859
	10	4.23648	0.117832		10	4.23648	0.360218
	10	4.24672	0.112427		10	4.24672	0.413418
	10	4.25696	0.193222		10	4.25696	0.400349
	10	4.2672	0.215385		10	4.2672	0.37933
	10	4.27744	0.18441		10	4.27744	0.374466
	10	4.28768	0.179718		10	4.28768	0.314869
	10	4.29792	0.220829		10	4.29792	0.327168
	10	4.30816	0.175243		10	4.30816	0.277233
	10	4.3184	0.156052		10	4.3184	0.302311
	10	4.32864	0.15377		10	4.32864	0.276272
	10	4.33888	0.179359		10	4.33888	0.217129
	10	4.34912	0.154137		10	4.34912	0.216019
	10	4.35936	0.154568		10	4.35936	0.2197
	10	4.3696	0.218349		10	4.3696	0.163563
	10	4.37984	0.161449		10	4.37984	0.155972
	10	4.39008	0.0942841		10	4.39008	0.10297
	10	4.40032	0.0571442		10	4.40032	0.0893593
	10	4.41056	0.0498428		10	4.41056	0.0847435
	10	4.4208	0.152863		10	4.4208	0.0449524
	10	4.43104	0.200699		10	4.43104	-0.0180092
	10	4.44128	0.267944		10	4.44128	-0.0561295
	10	4.45152	0.295563		10	4.45152	-0.124119
	10	4.46176	0.261513		10	4.46176	-0.152618
	10	4.472	0.266716		10	4.472	-0.120979
	10	4.48224	0.263039		10	4.48224	-0.124878
	10	4.49248	0.401741		10	4.49248	-0.183594
	10	4.50272	0.392597		10	4.50272	-0.151638
	10	4.51296	0.273102		10	4.51296	-0.146973
	10	4.5232	0.189007		10	4.5232	-0.123188
	10	4.53344	0.218513		10	4.53344	-0.104572
	10	4.54368	0.260689		10	4.54368	-0.147434
	10	4.55392	0.27636		10	4.55392	-0.33297
	10	4.56416	0.231289		10	4.56416	-0.402538
	10	4.5744	0.182301		10	4.5744	-0.465763
	10	4.58464	0.26403		10	4.58464	-0.564762
	10	4.59488	0.265923		10	4.59488	-0.632866
	10	4.60512	0.258446		10	4.60512	-0.732883
	10	4.61536	0.272202		10	4.61536	-0.895329
	10	4.6256	0.132401		10	4.6256	-1.00467
	10	4.63584	0.148212		10	4.63584	-1.13417
	10	4.64608	0.216084		10	4.64608	-1.27174
	10	4.65632	0.20153		10	4.65632	-1.41804
	10	4.66656	0.273125		10	4.66656	-1.47974
	10	4.6768	0.427155		10	4.6768	-1.61275
	10	4.68704	0.525326		10	4.68704	-1.88102
	10	4.69728	0.455212		10	4.69728	-2.13676
	10	4.70752	0.455177		10	4.70752	-2.2957
	10	4.71776	0.451012		10	4.71776	-2.47679
	10	4.728	0.546371		10	4.728	-2.61689
	10	4.73824	0.594414		10	4.73824	-2.92843
	10	4.74848	0.604916		10	4.74848	-3.1944
	10	4.75872	0.620918		10	4.75872	-3.47998
	10	4.76896	0.686485		10	4.76896	-3.67914
	10	4.7792	0.773666		10	4.7792	-3.96145
	10	4.78944	0.902813		10	4.78944	-4.26159
	10	4.79968	1.00793		10	4.79968	-4.50692
	10	4.80992	1.11148		10	4.80992	-4.64672
	10	4.82016	1.18983		10	4.82016	-4.9225
	10	4.8304	1.17271		10	4.8304	-5.24257
	10	4.84064	1.228		10	4.84064	-5.53379
	10	4.85088	1.29775		10	4.85088	-5.80804
	10	4.86112	1.34507		10	4.86112	-6.14188
	10	4.87136	1.4304		10	4.87136	-6.4705
	10	4.8816	1.55295		10	4.8816	-6.70142
	10	4.89184	1.67367		10	4.89184	-6.93468
	10	4.90208	1.74522		10	4.90208	-7.29539
	10	4.91232	1.85162		10	4.91232	-7.60399
	10	4.92256	2.05577		10	4.92256	-7.81945
	10	4.9328	2.2588		10	4.9328	-8.03563
	10	4.94304	2.41526		10	4.94304	-8.25002
	10	4.95328	2.5843		10	4.95328	-8.59497
	10	4.96352	2.73534		10	4.96352	-8.87688
	10	4.97376	2.91315		10	4.97376	-9.04454
	10	4.984	3.14925		10	4.984	-9.31884
	10	4.99424	3.20425		10	4.99424	-9.5127
	10	5.00448	3.3129		10	5.00448	-9.73861
	10	5.01472	3.47988		10	5.01472	-9.92183
	10	5.02496	3.67412		10	5.02496	-10.1495
	10	5.0352	3.89199		10	5.0352	-10.4063
	10	5.04544	4.14333		10	5.04544	-10.6605
	10	5.05568	4.4274		10	5.05568	-10.889
	10	5.06592	4.78992		10	5.06592	-11.0375
	10	5.07616	5.09299		10	5.07616	-11.1794
	10	5.0864	5.32517		10	5.0864	-11.3629
	10	5.09664	5.64803		10	5.09664	-11.4737
	10	5.10688	5.86661		10	5.10688	-11.5744
	10	5.11712	6.2098		10	5.11712	-11.6986
	10	5.12736	6.64007		10	5.12736	-11.8566
	10	5.1376	7.20057		10	5.1376	-11.9662
	10	5.14784	7.80853		10	5.14784	-12.1011
	10	5.15808	8.43816		10	5.15808	-12.2304
	10	5.16832	9.15228		10	5.16832	-12.3358
	10	5.17856	10.0846		10	5.17856	-12.5354
	10	5.1888	11.1164		10	5.1888	-12.6426
	10	5.19904	12.2791		10	5.19904	-12.6299
	10	5.20928	13.7207		10	5.20928	-12.7048
	10	5.21952	15.3495		10	5.21952	-12.8275
	10	5.22976	17.197		10	5.22976	-12.9175
	10	5.24	19.369		10	5.24	-13.0371
	10	5.25024	21.7915		10	5.25024	-13.1045
	10	5.26048	24.4287		10	5.26048	-13.2473
	10	5.27072	27.3521		10	5.27072	-13.3348
	10	5.28096	30.5868		10	5.28096	-13.3956
	10	5.2912	33.967		10	5.2912	-13.5241
	10	5.30144	37.3727		10	5.30144	-13.6251
	10	5.31168	40.7494		10	5.31168	-13.6651
	10	5.32192	44.0049		10	5.32192	-13.6526
	10	5.33216	46.986		10	5.33216	-13.6806
	10	5.3424	49.6603		10	5.3424	-13.7551
	10	5.35264	51.9857		10	5.35264	-13.7856
	10	5.36288	53.3832		10	5.36288	-13.8743
	10	5.37312	53.4584		10	5.37312	-13.9133
	10	5.38336	53.0776		10	5.38336	-14.0406
	10	5.3936	53.8827		10	5.3936	-14.0898
	10	5.40384	54.4916		10	5.40384	-14.13
	10	5.41408	54.5482		10	5.41408	-14.1912
	10	5.42432	53.4982		10	5.42432	-14.2086
	10	5.43456	52.0655		10	5.43456	-14.219
	10	5.4448	50.5382		10	5.4448	-14.2053
	10	5.45504	48.7337		10	5.45504	-14.2225
	10	5.46528	46.7447		10	5.46528	-14.2861
	10	5.47552	45.3424		10	5.47552	-14.3831
	10	5.48576	43.0805		10	5.48576	-14.4255
	10	5.496	41.7836		10	5.496	-14.4424
	10	5.50624	40.1274		10	5.50624	-14.4409
	10	5.51648	37.7302		10	5.51648	-14.4529
	10	5.52672	35.4013		10	5.52672	-14.4764
	10	5.53696	33.0734		10	5.53696	-14.4496
	10	5.5472	30.854		10	5.5472	-14.4951
	10	5.55744	28.6176		10	5.55744	-14.4905
	10	5.56768	26.5636		10	5.56768	-14.5434
	10	5.57792	24.6427		10	5.57792	-14.5746
	10	5.58816	22.6425		10	5.58816	-14.5291
	10	5.5984	20.7421		10	5.5984	-14.4293
	10	5.60864	19.0324		10	5.60864	-14.3917
	10	5.61888	17.4436		10	5.61888	-14.3937
	10	5.62912	16.0084		10	5.62912	-14.3966
	10	5.63936	14.6398		10	5.63936	-14.4503
	10	5.6496	13.3108		10	5.6496	-14.4598
	10	5.65984	12.1976		10	5.65984	-14.4589
	10	5.67008	11.1294		10	5.67008	-14.5168
	10	5.68032	10.2285		10	5.68032	-14.5225
	10	5.69056	9.41326		10	5.69056	-14.5138
	10	5.7008	8.58689		10	5.7008	-14.4738
	10	5.71104	7.87618		10	5.71104	-14.4733
	10	5.72128	7.22643		10	5.72128	-14.5131
	10	5.73152	6.84045		10	5.73152	-14.4946
	10	5.74176	6.45858		10	5.74176	-14.4607
	10	5.752	6.07364		10	5.752	-14.4671
	10	5.76224	5.66303		10	5.76224	-14.4464
	10	5.77248	5.33431		10	5.77248	-14.4378
	10	5.78272	5.10503		10	5.78272	-14.3546
	10	5.79296	4.84244		10	5.79296	-14.2612
	10	5.8032	4.71564		10	5.8032	-14.2305
	10	5.81344	4.591		10	5.81344	-14.2257
	10	5.82368	4.41457		10	5.82368	-14.2637
	10	5.83392	4.35051		10	5.83392	-14.3022
	10	5.84416	4.28167		10	5.84416	-14.2988
	10	5.8544	4.22144		10	5.8544	-14.2219
	10	5.86464	4.13558		10	5.86464	-14.2006
	10	5.87488	4.07776		10	5.87488	-14.1703
	10	5.88512	4.02876		10	5.88512	-14.1257
	10	5.89536	3.94688		10	5.89536	-14.1474
	10	5.9056	3.94937		10	5.9056	-14.1524
	10	5.91584	3.90967		10	5.91584	-14.0961
	10	5.92608	4.02502		10	5.92608	-14.0569
	10	5.93632	4.09542		10	5.93632	-13.9328
	10	5.94656	4.05301		10	5.94656	-13.8434
	10	5.9568	4.06579		10	5.9568	-13.8853
	10	5.96704	4.15463		10	5.96704	-13.9321
	10	5.97728	4.25476		10	5.97728	-13.9295
	10	5.98752	4.18834		10	5.98752	-13.8426
	10	5.99776	4.20615		10	5.99776	-13.739
	20	3.50944	0.146172		20	3.50944	-0.0885391
	20	3.51968	0.163708		20	3.51968	-0.0771713
	20	3.52992	0.0791817		20	3.52992	-0.0417709
	20	3.54016	-0.0812721		20	3.54016	-0.0421867
	20	3.5504	-0.115265		20	3.5504	-0.0830879
	20	3.56064	-0.020546		20	3.56064	-0.0307922
	20	3.57088	0.0576897		20	3.57088	0.00858307
	20	3.58112	0.0108833		20	3.58112	0.0334854
	20	3.59136	-0.0165253		20	3.59136	0.0119553
	20	3.6016	-0.0785904		20	3.6016	-0.137001
	20	3.61184	-0.0621262		20	3.61184	-0.161682
	20	3.62208	-0.0351486		20	3.62208	-0.113541
	20	3.63232	0.0151596		20	3.63232	-0.107365
	20	3.64256	0.0388107		20	3.64256	-0.101196
	20	3.6528	-0.0150375		20	3.6528	-0.0573845
	20	3.66304	-0.0260887		20	3.66304	-0.012413
	20	3.67328	0.0050354		20	3.67328	-0.0401993
	20	3.68352	0.0857925		20	3.68352	-0.0552444
	20	3.69376	0.0844498		20	3.69376	-0.0579948
	20	3.704	0.1315		20	3.704	-0.00258636
	20	3.71424	0.165543		20	3.71424	0.0344658
	20	3.72448	0.161415		20	3.72448	0.0481033
	20	3.73472	0.152763		20	3.73472	0.0986786
	20	3.74496	0.0852661		20	3.74496	0.0895844
	20	3.7552	0.0080452		20	3.7552	0.0989761
	20	3.76544	0.0123672		20	3.76544	0.0436096
	20	3.77568	0.0612869		20	3.77568	0.00465012
	20	3.78592	0.0372047		20	3.78592	0.0519524
	20	3.79616	-0.0217285		20	3.79616	-0.0285492
	20	3.8064	-0.104946		20	3.8064	-0.0457878
	20	3.81664	-0.0777817		20	3.81664	-0.084404
	20	3.82688	-0.00457764		20	3.82688	-0.0851135
	20	3.83712	0.0492744		20	3.83712	-0.091713
	20	3.84736	0.0437927		20	3.84736	-0.128784
	20	3.8576	-0.0410767		20	3.8576	-0.116638
	20	3.86784	0.0955925		20	3.86784	-0.130688
	20	3.87808	0.0863762		20	3.87808	-0.0499001
	20	3.88832	0.0239716		20	3.88832	0.130943
	20	3.89856	0.0353851		20	3.89856	0.117214
	20	3.9088	0.0377808		20	3.9088	0.206047
	20	3.91904	0.00362396		20	3.91904	0.21286
	20	3.92928	-0.0815506		20	3.92928	0.198746
	20	3.93952	-0.127769		20	3.93952	0.102242
	20	3.94976	-0.0324135		20	3.94976	0.0635223
	20	3.96	-0.0213394		20	3.96	0.120171
	20	3.97024	-0.052269		20	3.97024	0.113213
	20	3.98048	0.00273132		20	3.98048	0.186028
	20	3.99072	-0.0168457		20	3.99072	0.201458
	20	4.00096	-0.0765915		20	4.00096	0.231743
	20	4.0112	-0.151165		20	4.0112	0.251461
	20	4.02144	-0.0308647		20	4.02144	0.250076
	20	4.03168	-0.0754128		20	4.03168	0.287151
	20	4.04192	-0.107025		20	4.04192	0.305534
	20	4.05216	-0.0880966		20	4.05216	0.249062
	20	4.0624	-0.0178719		20	4.0624	0.195129
	20	4.07264	-0.0697327		20	4.07264	0.185623
	20	4.08288	-0.134117		20	4.08288	0.217743
	20	4.09312	-0.153		20	4.09312	0.23922
	20	4.10336	-0.16066		20	4.10336	0.264763
	20	4.1136	-0.193687		20	4.1136	0.271679
	20	4.12384	-0.141106		20	4.12384	0.306129
	20	4.13408	-0.125893		20	4.13408	0.249634
	20	4.14432	-0.163643		20	4.14432	0.147545
	20	4.15456	-0.109924		20	4.15456	0.162529
	20	4.1648	-0.073822		20	4.1648	0.213982
	20	4.17504	-0.131893		20	4.17504	0.25045
	20	4.18528	-0.163155		20	4.18528	0.198467
	20	4.19552	-0.177979		20	4.19552	0.171494
	20	4.20576	-0.190826		20	4.20576	0.133194
	20	4.216	-0.115879		20	4.216	0.114128
	20	4.22624	-0.0818634		20	4.22624	0.0343742
	20	4.23648	-0.0485802		20	4.23648	0.00419617
	20	4.24672	-0.142159		20	4.24672	-0.0378952
	20	4.25696	-0.12352		20	4.25696	-0.064476
	20	4.2672	-0.120071		20	4.2672	-0.0821457
	20	4.27744	-0.0944748		20	4.27744	-0.0806198
	20	4.28768	-0.134243		20	4.28768	-0.10289
	20	4.29792	-0.0765305		20	4.29792	-0.0579529
	20	4.30816	-0.128555		20	4.30816	-0.0249481
	20	4.3184	-0.0874481		20	4.3184	-0.023262
	20	4.32864	-0.0315933		20	4.32864	-0.0175247
	20	4.33888	-0.018013		20	4.33888	-0.109642
	20	4.34912	-0.0154037		20	4.34912	-0.108871
	20	4.35936	0.0260086		20	4.35936	-0.143105
	20	4.3696	-0.0236168		20	4.3696	-0.148148
	20	4.37984	-0.0553894		20	4.37984	-0.174908
	20	4.39008	-0.0230637		20	4.39008	-0.260033
	20	4.40032	-0.0173225		20	4.40032	-0.342758
	20	4.41056	-0.0382538		20	4.41056	-0.500267
	20	4.4208	-0.0170479		20	4.4208	-0.683464
	20	4.43104	-0.0929108		20	4.43104	-0.798779
	20	4.44128	-0.117531		20	4.44128	-0.925598
	20	4.45152	-0.114517		20	4.45152	-1.05825
	20	4.46176	-0.0158768		20	4.46176	-1.26459
	20	4.472	-0.0135002		20	4.472	-1.48252
	20	4.48224	-0.0301552		20	4.48224	-1.64253
	20	4.49248	0.0802803		20	4.49248	-1.80313
	20	4.50272	0.0651779		20	4.50272	-1.98509
	20	4.51296	0.0308266		20	4.51296	-2.25412
	20	4.5232	0.0246391		20	4.5232	-2.45481
	20	4.53344	0.0307884		20	4.53344	-2.75613
	20	4.54368	0.0324249		20	4.54368	-3.13356
	20	4.55392	0.0798416		20	4.55392	-3.40855
	20	4.56416	0.0678177		20	4.56416	-3.69151
	20	4.5744	0.0910492		20	4.5744	-3.94188
	20	4.58464	0.11879		20	4.58464	-4.18746
	20	4.59488	0.17804		20	4.59488	-4.39293
	20	4.60512	0.217293		20	4.60512	-4.6628
	20	4.61536	0.337288		20	4.61536	-4.94543
	20	4.6256	0.39492		20	4.6256	-5.25352
	20	4.63584	0.45108		20	4.63584	-5.56165
	20	4.64608	0.559109		20	4.64608	-5.85261
	20	4.65632	0.599342		20	4.65632	-6.09487
	20	4.66656	0.631496		20	4.66656	-6.41563
	20	4.6768	0.62001		20	4.6768	-6.72181
	20	4.68704	0.744232		20	4.68704	-7.05347
	20	4.69728	0.940147		20	4.69728	-7.34084
	20	4.70752	1.06635		20	4.70752	-7.50053
	20	4.71776	1.09542		20	4.71776	-7.70413
	20	4.728	1.23109		20	4.728	-7.97492
	20	4.73824	1.32243		20	4.73824	-8.24581
	20	4.74848	1.42497		20	4.74848	-8.48849
	20	4.75872	1.58813		20	4.75872	-8.77851
	20	4.76896	1.82049		20	4.76896	-9.0909
	20	4.7792	1.9782		20	4.7792	-9.26502
	20	4.78944	2.1482		20	4.78944	-9.53815
	20	4.79968	2.36826		20	4.79968	-9.74612
	20	4.80992	2.43453		20	4.80992	-10.0112
	20	4.82016	2.62827		20	4.82016	-10.2241
	20	4.8304	2.81517		20	4.8304	-10.3819
	20	4.84064	3.0172		20	4.84064	-10.5448
	20	4.85088	3.20456		20	4.85088	-10.7226
	20	4.86112	3.41814		20	4.86112	-10.9057
	20	4.87136	3.66194		20	4.87136	-11.0924
	20	4.8816	3.82631		20	4.8816	-11.267
	20	4.89184	3.99731		20	4.89184	-11.4737
	20	4.90208	4.29528		20	4.90208	-11.6361
	20	4.91232	4.50811		20	4.91232	-11.6871
	20	4.92256	4.82209		20	4.92256	-11.7514
	20	4.9328	5.06107		20	4.9328	-11.8931
	20	4.94304	5.3685		20	4.94304	-11.9933
	20	4.95328	5.73261		20	4.95328	-12.1443
	20	4.96352	6.20591		20	4.96352	-12.2975
	20	4.97376	6.75049		20	4.97376	-12.4398
	20	4.984	7.36378		20	4.984	-12.537
	20	4.99424	7.80874		20	4.99424	-12.5663
	20	5.00448	8.40747		20	5.00448	-12.6826
	20	5.01472	9.16096		20	5.01472	-12.856
	20	5.02496	9.93889		20	5.02496	-12.8691
	20	5.0352	10.6537		20	5.0352	-12.9848
	20	5.04544	11.4018		20	5.04544	-13.0614
	20	5.05568	12.4386		20	5.05568	-13.1646
	20	5.06592	13.6454		20	5.06592	-13.2809
	20	5.07616	14.9971		20	5.07616	-13.3449
	20	5.0864	16.5966		20	5.0864	-13.3803
	20	5.09664	18.5223		20	5.09664	-13.4747
	20	5.10688	20.821		20	5.10688	-13.5286
	20	5.11712	23.4529		20	5.11712	-13.5651
	20	5.12736	26.3841		20	5.12736	-13.6656
	20	5.1376	29.5801		20	5.1376	-13.7401
	20	5.14784	32.9996		20	5.14784	-13.7747
	20	5.15808	36.4654		20	5.15808	-13.8719
	20	5.16832	39.8984		20	5.16832	-13.8825
	20	5.17856	43.0559		20	5.17856	-13.9167
	20	5.1888	46.0651		20	5.1888	-13.9561
	20	5.19904	48.6207		20	5.19904	-14.0097
	20	5.20928	50.7696		20	5.20928	-14.0418
	20	5.21952	51.4795		20	5.21952	-14.0499
	20	5.22976	52.4473		20	5.22976	-14.0659
	20	5.24	53.4374		20	5.24	-14.1635
	20	5.25024	54.058		20	5.25024	-14.2464
	20	5.26048	53.0933		20	5.26048	-14.2812
	20	5.27072	52.5379		20	5.27072	-14.2914
	20	5.28096	51.3183		20	5.28096	-14.2342
	20	5.2912	50.1842		20	5.2912	-14.2412
	20	5.30144	49.9294		20	5.30144	-14.2952
	20	5.31168	49.4119		20	5.31168	-14.3729
	20	5.32192	47.6967		20	5.32192	-14.3687
	20	5.33216	45.8215		20	5.33216	-14.3904
	20	5.3424	43.7544		20	5.3424	-14.3802
	20	5.35264	41.5484		20	5.35264	-14.3859
	20	5.36288	39.682		20	5.36288	-14.3995
	20	5.37312	37.43		20	5.37312	-14.4275
	20	5.38336	35.1243		20	5.38336	-14.4489
	20	5.3936	32.9212		20	5.3936	-14.3818
	20	5.40384	30.739		20	5.40384	-14.391
	20	5.41408	28.5816		20	5.41408	-14.4737
	20	5.42432	26.4139		20	5.42432	-14.4869
	20	5.43456	24.3775		20	5.43456	-14.4883
	20	5.4448	22.4415		20	5.4448	-14.4807
	20	5.45504	20.6455		20	5.45504	-14.4496
	20	5.46528	18.9961		20	5.46528	-14.4482
	20	5.47552	17.5535		20	5.47552	-14.477
	20	5.48576	16.2085		20	5.48576	-14.4417
	20	5.496	14.9244		20	5.496	-14.3877
	20	5.50624	13.6623		20	5.50624	-14.4295
	20	5.51648	12.5012		20	5.51648	-14.4022
	20	5.52672	11.5165		20	5.52672	-14.3971
	20	5.53696	10.5776		20	5.53696	-14.379
	20	5.5472	9.72485		20	5.5472	-14.3926
	20	5.55744	8.90573		20	5.55744	-14.3966
	20	5.56768	8.15456		20	5.56768	-14.343
	20	5.57792	7.49845		20	5.57792	-14.4219
	20	5.58816	6.95163		20	5.58816	-14.3355
	20	5.5984	6.482		20	5.5984	-14.2597
	20	5.60864	5.96291		20	5.60864	-14.2364
	20	5.61888	5.59145		20	5.61888	-14.274
	20	5.62912	5.32492		20	5.62912	-14.2791
	20	5.63936	5.04441		20	5.63936	-14.3218
	20	5.6496	4.83099		20	5.6496	-14.3181
	20	5.65984	4.69646		20	5.65984	-14.2364
	20	5.67008	4.55882		20	5.67008	-14.186
	20	5.68032	4.47808		20	5.68032	-14.1658
	20	5.69056	4.41971		20	5.69056	-14.2203
	20	5.7008	4.31397		20	5.7008	-14.1971
	20	5.71104	4.25601		20	5.71104	-14.1444
	20	5.72128	4.24785		20	5.72128	-14.1426
	20	5.73152	4.16711		20	5.73152	-14.1331
	20	5.74176	4.19872		20	5.74176	-14.1026
	20	5.752	4.25479		20	5.752	-14.0517
	20	5.76224	4.23995		20	5.76224	-13.9317
	20	5.77248	4.16507		20	5.77248	-13.8927
	20	5.78272	4.18594		20	5.78272	-13.8262
	20	5.79296	4.26382		20	5.79296	-13.7615
	20	5.8032	4.32418		20	5.8032	-13.7053
	20	5.81344	4.34094		20	5.81344	-13.6889
	20	5.82368	4.34383		20	5.82368	-13.7092
	20	5.83392	4.42287		20	5.83392	-13.7661
	20	5.84416	4.55051		20	5.84416	-13.7651
	20	5.8544	4.55077		20	5.8544	-13.7122
	20	5.86464	4.60423		20	5.86464	-13.6721
	20	5.87488	4.67715		20	5.87488	-13.684
	20	5.88512	4.80664		20	5.88512	-13.5873
	20	5.89536	4.94047		20	5.89536	-13.5707
	20	5.9056	5.00608		20	5.9056	-13.6056
	20	5.91584	5.14668		20	5.91584	-13.5086
	20	5.92608	5.26009		20	5.92608	-13.429
	20	5.93632	5.26787		20	5.93632	-13.3763
	20	5.94656	5.35011		20	5.94656	-13.3773
	20	5.9568	5.5085		20	5.9568	-13.3786
	20	5.96704	5.61137		20	5.96704	-13.2958
	20	5.97728	5.69286		20	5.97728	-13.2271
	20	5.98752	5.76467		20	5.98752	-13.1555
	20	5.99776	5.88224		20	5.99776	-13.1406
	30	3.50944	0.160088		30	3.50944	0.37138
	30	3.51968	0.233025		30	3.51968	0.428185
	30	3.52992	0.223518		30	3.52992	0.383133
	30	3.54016	0.140068		30	3.54016	0.339218
	30	3.5504	0.144257		30	3.5504	0.38723
	30	3.56064	0.137764		30	3.56064	0.409668
	30	3.57088	0.172333		30	3.57088	0.416359
	30	3.58112	0.118		30	3.58112	0.377815
	30	3.59136	0.0876083		30	3.59136	0.378738
	30	3.6016	0.160965		30	3.6016	0.328083
	30	3.61184	0.115627		30	3.61184	0.320374
	30	3.62208	0.0834999		30	3.62208	0.317009
	30	3.63232	0.143177		30	3.63232	0.353722
	30	3.64256	0.146561		30	3.64256	0.387306
	30	3.6528	0.12933		30	3.6528	0.468002
	30	3.66304	0.126816		30	3.66304	0.46772
	30	3.67328	0.173332		30	3.67328	0.447182
	30	3.68352	0.21553		30	3.68352	0.459637
	30	3.69376	0.130119		30	3.69376	0.438583
	30	3.704	0.0782089		30	3.704	0.452827
	30	3.71424	0.111794		30	3.71424	0.483997
	30	3.72448	0.108677		30	3.72448	0.490845
	30	3.73472	0.14642		30	3.73472	0.436058
	30	3.74496	0.144871		30	3.74496	0.436707
	30	3.7552	0.106472		30	3.7552	0.478851
	30	3.76544	0.149307		30	3.76544	0.486694
	30	3.77568	0.118576		30	3.77568	0.493301
	30	3.78592	0.0720558		30	3.78592	0.446877
	30	3.79616	0.0576744		30	3.79616	0.42997
	30	3.8064	0.00846863		30	3.8064	0.430794
	30	3.81664	-0.0782013		30	3.81664	0.494072
	30	3.82688	-0.0515671		30	3.82688	0.49836
	30	3.83712	-0.111359		30	3.83712	0.52861
	30	3.84736	0.00617981		30	3.84736	0.566341
	30	3.8576	0.0655136		30	3.8576	0.603447
	30	3.86784	0.0752487		30	3.86784	0.62933
	30	3.87808	0.144905		30	3.87808	0.651981
	30	3.88832	0.0881729		30	3.88832	0.636482
	30	3.89856	0.0269165		30	3.89856	0.565414
	30	3.9088	-0.00408936		30	3.9088	0.590042
	30	3.91904	0.0159225		30	3.91904	0.691452
	30	3.92928	0.0565796		30	3.92928	0.746494
	30	3.93952	0.0295563		30	3.93952	0.78669
	30	3.94976	0.0190659		30	3.94976	0.821781
	30	3.96	0.1031		30	3.96	0.788376
	30	3.97024	0.147736		30	3.97024	0.77647
	30	3.98048	0.172771		30	3.98048	0.842876
	30	3.99072	0.0980682		30	3.99072	0.79015
	30	4.00096	0.0639191		30	4.00096	0.7659
	30	4.0112	0.106503		30	4.0112	0.698227
	30	4.02144	0.038105		30	4.02144	0.616867
	30	4.03168	-0.0463905		30	4.03168	0.675953
	30	4.04192	-0.0802803		30	4.04192	0.589111
	30	4.05216	-0.122314		30	4.05216	0.512207
	30	4.0624	-0.248383		30	4.0624	0.510345
	30	4.07264	-0.237717		30	4.07264	0.525398
	30	4.08288	-0.202709		30	4.08288	0.551247
	30	4.09312	-0.174419		30	4.09312	0.543373
	30	4.10336	-0.163452		30	4.10336	0.460266
	30	4.1136	-0.197357		30	4.1136	0.420944
	30	4.12384	-0.15657		30	4.12384	0.440933
	30	4.13408	-0.152061		30	4.13408	0.440567
	30	4.14432	-0.110958		30	4.14432	0.377533
	30	4.15456	-0.087204		30	4.15456	0.372963
	30	4.1648	-0.0892754		30	4.1648	0.351913
	30	4.17504	-0.126629		30	4.17504	0.287758
	30	4.18528	-0.128296		30	4.18528	0.221313
	30	4.19552	-0.0643539		30	4.19552	0.252716
	30	4.20576	-0.0547295		30	4.20576	0.26178
	30	4.216	-0.0947113		30	4.216	0.239887
	30	4.22624	-0.107063		30	4.22624	0.257885
	30	4.23648	-0.0845718		30	4.23648	0.301086
	30	4.24672	-0.144455		30	4.24672	0.324837
	30	4.25696	-0.152176		30	4.25696	0.365868
	30	4.2672	-0.159943		30	4.2672	0.323692
	30	4.27744	-0.143456		30	4.27744	0.298923
	30	4.28768	-0.156082		30	4.28768	0.284096
	30	4.29792	-0.163219		30	4.29792	0.261974
	30	4.30816	-0.164322		30	4.30816	0.141373
	30	4.3184	-0.100479		30	4.3184	0.0511551
	30	4.32864	-0.0438843		30	4.32864	-0.040802
	30	4.33888	-0.0708771		30	4.33888	-0.124184
	30	4.34912	-0.139687		30	4.34912	-0.150829
	30	4.35936	-0.187592		30	4.35936	-0.234753
	30	4.3696	-0.171112		30	4.3696	-0.297783
	30	4.37984	-0.212246		30	4.37984	-0.458878
	30	4.39008	-0.144485		30	4.39008	-0.586212
	30	4.40032	-0.187958		30	4.40032	-0.847679
	30	4.41056	-0.234562		30	4.41056	-0.983475
	30	4.4208	-0.169575		30	4.4208	-1.09049
	30	4.43104	-0.0687943		30	4.43104	-1.24047
	30	4.44128	-0.00856781		30	4.44128	-1.43521
	30	4.45152	0.0376358		30	4.45152	-1.61528
	30	4.46176	0.0962524		30	4.46176	-1.92668
	30	4.472	0.0977936		30	4.472	-2.22389
	30	4.48224	0.0854378		30	4.48224	-2.52628
	30	4.49248	0.119705		30	4.49248	-2.84182
	30	4.50272	0.188721		30	4.50272	-3.15314
	30	4.51296	0.252556		30	4.51296	-3.40818
	30	4.5232	0.263237		30	4.5232	-3.69068
	30	4.53344	0.291973		30	4.53344	-3.91664
	30	4.54368	0.396675		30	4.54368	-4.17593
	30	4.55392	0.377487		30	4.55392	-4.4559
	30	4.56416	0.428391		30	4.56416	-4.75569
	30	4.5744	0.493317		30	4.5744	-5.02296
	30	4.58464	0.54073		30	4.58464	-5.32773
	30	4.59488	0.623901		30	4.59488	-5.63075
	30	4.60512	0.698704		30	4.60512	-5.93674
	30	4.61536	0.807102		30	4.61536	-6.21766
	30	4.6256	0.891296		30	4.6256	-6.50902
	30	4.63584	1.03941		30	4.63584	-6.80424
	30	4.64608	1.12202		30	4.64608	-7.06818
	30	4.65632	1.29692		30	4.65632	-7.37439
	30	4.66656	1.42199		30	4.66656	-7.67466
	30	4.6768	1.57738		30	4.6768	-7.88595
	30	4.68704	1.70096		30	4.68704	-8.16074
	30	4.69728	1.79987		30	4.69728	-8.45756
	30	4.70752	1.91393		30	4.70752	-8.70822
	30	4.71776	2.09777		30	4.71776	-8.87645
	30	4.728	2.26779		30	4.728	-9.06058
	30	4.73824	2.43819		30	4.73824	-9.31249
	30	4.74848	2.68701		30	4.74848	-9.55686
	30	4.75872	2.87622		30	4.75872	-9.81718
	30	4.76896	2.99548		30	4.76896	-10.0376
	30	4.7792	3.16154		30	4.7792	-10.2457
	30	4.78944	3.42567		30	4.78944	-10.4369
	30	4.79968	3.61342		30	4.79968	-10.6133
	30	4.80992	3.76411		30	4.80992	-10.8335
	30	4.82016	3.97791		30	4.82016	-10.9884
	30	4.8304	4.24474		30	4.8304	-11.1343
	30	4.84064	4.54526		30	4.84064	-11.2441
	30	4.85088	4.90599		30	4.85088	-11.4068
	30	4.86112	5.17738		30	4.86112	-11.5596
	30	4.87136	5.47646		30	4.87136	-11.7603
	30	4.8816	5.77623		30	4.8816	-11.8666
	30	4.89184	6.08694		30	4.89184	-11.9557
	30	4.90208	6.46184		30	4.90208	-12.0974
	30	4.91232	6.91748		30	4.91232	-12.2577
	30	4.92256	7.38488		30	4.92256	-12.4097
	30	4.9328	8.00836		30	4.9328	-12.5875
	30	4.94304	8.68721		30	4.94304	-12.6444
	30	4.95328	9.35477		30	4.95328	-12.7031
	30	4.96352	10.0505		30	4.96352	-12.7363
	30	4.97376	10.9295		30	4.97376	-12.7821
	30	4.984	11.9693		30	4.984	-12.919
	30	4.99424	13.2803		30	4.99424	-13.0261
	30	5.00448	14.6516		30	5.00448	-13.0976
	30	5.01472	16.1823		30	5.01472	-13.1182
	30	5.02496	17.9267		30	5.02496	-13.1821
	30	5.0352	19.9068		30	5.0352	-13.2446
	30	5.04544	22.3677		30	5.04544	-13.357
	30	5.05568	25.1008		30	5.05568	-13.4573
	30	5.06592	28.2251		30	5.06592	-13.5394
	30	5.07616	31.4809		30	5.07616	-13.6453
	30	5.0864	34.7055		30	5.0864	-13.7418
	30	5.09664	37.9789		30	5.09664	-13.8011
	30	5.10688	41.1337		30	5.10688	-13.8657
	30	5.11712	44.1957		30	5.11712	-13.9212
	30	5.12736	46.9164		30	5.12736	-13.9207
	30	5.1376	49.2871		30	5.1376	-14.0183
	30	5.14784	51.2187		30	5.14784	-14.0196
	30	5.15808	52.6552		30	5.15808	-14.0456
	30	5.16832	53.5233		30	5.16832	-14.0355
	30	5.17856	53.8325		30	5.17856	-14.0647
	30	5.1888	53.5694		30	5.1888	-14.1125
	30	5.19904	52.9738		30	5.19904	-14.1495
	30	5.20928	52.4329		30	5.20928	-14.1847
	30	5.21952	52.4154		30	5.21952	-14.1975
	30	5.22976	51.5795		30	5.22976	-14.2154
	30	5.24	50.0514		30	5.24	-14.2532
	30	5.25024	48.3904		30	5.25024	-14.2995
	30	5.26048	46.4977		30	5.26048	-14.2736
	30	5.27072	44.4016		30	5.27072	-14.2834
	30	5.28096	42.1869		30	5.28096	-14.2849
	30	5.2912	39.9759		30	5.2912	-14.3209
	30	5.30144	37.7914		30	5.30144	-14.3893
	30	5.31168	35.5319		30	5.31168	-14.3619
	30	5.32192	33.3484		30	5.32192	-14.3555
	30	5.33216	31.1951		30	5.33216	-14.3654
	30	5.3424	29.0044		30	5.3424	-14.4126
	30	5.35264	27.2342		30	5.35264	-14.3781
	30	5.36288	25.2422		30	5.36288	-14.4005
	30	5.37312	23.3326		30	5.37312	-14.4598
	30	5.38336	21.4785		30	5.38336	-14.4845
	30	5.3936	19.7481		30	5.3936	-14.4912
	30	5.40384	18.0801		30	5.40384	-14.4153
	30	5.41408	16.5798		30	5.41408	-14.3897
	30	5.42432	15.1706		30	5.42432	-14.3625
	30	5.43456	13.9537		30	5.43456	-14.3635
	30	5.4448	12.793		30	5.4448	-14.3604
	30	5.45504	11.793		30	5.45504	-14.3158
	30	5.46528	10.8991		30	5.46528	-14.2934
	30	5.47552	10.0186		30	5.47552	-14.2519
	30	5.48576	9.17386		30	5.48576	-14.2784
	30	5.496	8.43412		30	5.496	-14.2187
	30	5.50624	7.70139		30	5.50624	-14.242
	30	5.51648	6.99311		30	5.51648	-14.1954
	30	5.52672	6.4575		30	5.52672	-14.1925
	30	5.53696	6.11547		30	5.53696	-14.1876
	30	5.5472	5.80421		30	5.5472	-14.1883
	30	5.55744	5.49401		30	5.55744	-14.1313
	30	5.56768	5.15585		30	5.56768	-14.1114
	30	5.57792	4.90528		30	5.57792	-13.9813
	30	5.58816	4.63293		30	5.58816	-13.9428
	30	5.5984	4.43243		30	5.5984	-13.9686
	30	5.60864	4.35521		30	5.60864	-13.9642
	30	5.61888	4.24027		30	5.61888	-13.88
	30	5.62912	4.1693		30	5.62912	-13.868
	30	5.63936	4.09098		30	5.63936	-13.8046
	30	5.6496	3.98471		30	5.6496	-13.7317
	30	5.65984	3.91645		30	5.65984	-13.7206
	30	5.67008	3.88939		30	5.67008	-13.6323
	30	5.68032	3.8427		30	5.68032	-13.5894
	30	5.69056	3.81934		30	5.69056	-13.5836
	30	5.7008	3.75446		30	5.7008	-13.578
	30	5.71104	3.76785		30	5.71104	-13.5719
	30	5.72128	3.73678		30	5.72128	-13.4478
	30	5.73152	3.71581		30	5.73152	-13.468
	30	5.74176	3.74532		30	5.74176	-13.448
	30	5.752	3.71254		30	5.752	-13.3877
	30	5.76224	3.70965		30	5.76224	-13.3988
	30	5.77248	3.73376		30	5.77248	-13.4853
	30	5.78272	3.73817		30	5.78272	-13.4469
	30	5.79296	3.72536		30	5.79296	-13.4437
	30	5.8032	3.78558		30	5.8032	-13.3437
	30	5.81344	3.86624		30	5.81344	-13.2817
	30	5.82368	3.88696		30	5.82368	-13.178
	30	5.83392	3.85669		30	5.83392	-13.1564
	30	5.84416	3.9042		30	5.84416	-13.1469
	30	5.8544	3.98748		30	5.8544	-13.0984
	30	5.86464	4.03481		30	5.86464	-13.0572
	30	5.87488	4.16277		30	5.87488	-13.0649
	30	5.88512	4.07797		30	5.88512	-13.084
	30	5.89536	4.14938		30	5.89536	-12.9504
	30	5.9056	4.2048		30	5.9056	-12.8438
	30	5.91584	4.29855		30	5.91584	-12.8241
	30	5.92608	4.37547		30	5.92608	-12.8084
	30	5.93632	4.4621		30	5.93632	-12.7029
	30	5.94656	4.49736		30	5.94656	-12.6698
	30	5.9568	4.5059		30	5.9568	-12.5949
	30	5.96704	4.53428		30	5.96704	-12.6131
	30	5.97728	4.53267		30	5.97728	-12.67
	30	5.98752	4.6116		30	5.98752	-12.6597
	30	5.99776	4.62764		30	5.99776	-12.6096
	40	3.50944	-0.0234985		40	3.50944	0.0941772
	40	3.51968	0.0418358		40	3.51968	0.0720291
	40	3.52992	0.110966		40	3.52992	0.0277519
	40	3.54016	0.145893		40	3.54016	-0.11652
	40	3.5504	0.150497		40	3.5504	-0.12603
	40	3.56064	0.0451584		40	3.56064	-0.0244217
	40	3.57088	0.0371513		40	3.57088	0.0458488
	40	3.58112	-0.0363541		40	3.58112	0.00723267
	40	3.59136	-0.0964737		40	3.59136	-0.0331421
	40	3.6016	-0.0910835		40	3.6016	-0.034584
	40	3.61184	-0.0945473		40	3.61184	-0.0731392
	40	3.62208	-0.133774		40	3.62208	-0.114357
	40	3.63232	-0.113197		40	3.63232	-0.137787
	40	3.64256	-0.107834		40	3.64256	-0.140984
	40	3.6528	-0.0300827		40	3.6528	-0.132244
	40	3.66304	-0.0645599		40	3.66304	-0.0601959
	40	3.67328	-0.0662842		40	3.67328	-0.0246429
	40	3.68352	-0.0564194		40	3.68352	-0.00493622
	40	3.69376	-0.110592		40	3.69376	0.0389481
	40	3.704	-0.173645		40	3.704	0.0614471
	40	3.71424	-0.158897		40	3.71424	0.044384
	40	3.72448	-0.243202		40	3.72448	0.0565414
	40	3.73472	-0.170433		40	3.73472	0.107521
	40	3.74496	-0.187347		40	3.74496	0.20047
	40	3.7552	-0.216961		40	3.7552	0.176891
	40	3.76544	-0.119251		40	3.76544	0.181652
	40	3.77568	-0.0995026		40	3.77568	0.177078
	40	3.78592	-0.162727		40	3.78592	0.0974426
	40	3.79616	-0.155441		40	3.79616	0.0501022
	40	3.8064	-0.203484		40	3.8064	0.0627136
	40	3.81664	-0.182087		40	3.81664	0.0919647
	40	3.82688	-0.227715		40	3.82688	0.121338
	40	3.83712	-0.188293		40	3.83712	0.0731506
	40	3.84736	-0.201012		40	3.84736	0.0748711
	40	3.8576	-0.234032		40	3.8576	0.110497
	40	3.86784	-0.213142		40	3.86784	0.108765
	40	3.87808	-0.22776		40	3.87808	0.121315
	40	3.88832	-0.215187		40	3.88832	0.14431
	40	3.89856	-0.208824		40	3.89856	0.184235
	40	3.9088	-0.174339		40	3.9088	0.2365
	40	3.91904	-0.195801		40	3.91904	0.273598
	40	3.92928	-0.140038		40	3.92928	0.292618
	40	3.93952	-0.0922012		40	3.93952	0.294697
	40	3.94976	-0.0800133		40	3.94976	0.300659
	40	3.96	-0.111015		40	3.96	0.22551
	40	3.97024	-0.0666351		40	3.97024	0.246773
	40	3.98048	-0.0959778		40	3.98048	0.187073
	40	3.99072	-0.126572		40	3.99072	0.158615
	40	4.00096	-0.071373		40	4.00096	0.0808144
	40	4.0112	-0.0456848		40	4.0112	0.0620193
	40	4.02144	-0.0462341		40	4.02144	0.0229607
	40	4.03168	-0.0555458		40	4.03168	-0.0608177
	40	4.04192	-0.00484085		40	4.04192	-0.0737648
	40	4.05216	0.00632858		40	4.05216	-0.0357437
	40	4.0624	0.0297661		40	4.0624	-0.00108337
	40	4.07264	0.073288		40	4.07264	-0.00981903
	40	4.08288	0.0973129		40	4.08288	-0.0672073
	40	4.09312	0.0489426		40	4.09312	-0.103615
	40	4.10336	0.0449905		40	4.10336	-0.147335
	40	4.1136	0.0313377		40	4.1136	-0.180145
	40	4.12384	0.0109901		40	4.12384	-0.272003
	40	4.13408	-0.0266724		40	4.13408	-0.337711
	40	4.14432	-0.0610428		40	4.14432	-0.37748
	40	4.15456	-0.096611		40	4.15456	-0.341324
	40	4.1648	-0.0643158		40	4.1648	-0.368042
	40	4.17504	-0.00666809		40	4.17504	-0.339729
	40	4.18528	0.00376511		40	4.18528	-0.362389
	40	4.19552	0.0145607		40	4.19552	-0.357113
	40	4.20576	0.0587997		40	4.20576	-0.432919
	40	4.216	0.145851		40	4.216	-0.560413
	40	4.22624	0.17762		40	4.22624	-0.615883
	40	4.23648	0.211845		40	4.23648	-0.613899
	40	4.24672	0.186935		40	4.24672	-0.574394
	40	4.25696	0.218376		40	4.25696	-0.594799
	40	4.2672	0.266655		40	4.2672	-0.654793
	40	4.27744	0.211128		40	4.27744	-0.758617
	40	4.28768	0.237267		40	4.28768	-0.813713
	40	4.29792	0.243057		40	4.29792	-0.95578
	40	4.30816	0.184689		40	4.30816	-1.11883
	40	4.3184	0.20787		40	4.3184	-1.21025
	40	4.32864	0.270805		40	4.32864	-1.34903
	40	4.33888	0.26973		40	4.33888	-1.45878
	40	4.34912	0.318321		40	4.34912	-1.51097
	40	4.35936	0.309898		40	4.35936	-1.57725
	40	4.3696	0.374584		40	4.3696	-1.71534
	40	4.37984	0.402779		40	4.37984	-1.8876
	40	4.39008	0.461601		40	4.39008	-2.09754
	40	4.40032	0.52224		40	4.40032	-2.25617
	40	4.41056	0.604366		40	4.41056	-2.53862
	40	4.4208	0.629215		40	4.4208	-2.72297
	40	4.43104	0.758171		40	4.43104	-2.90854
	40	4.44128	0.817589		40	4.44128	-3.25803
	40	4.45152	0.881058		40	4.45152	-3.59807
	40	4.46176	1.02988		40	4.46176	-3.79585
	40	4.472	1.04937		40	4.472	-4.07902
	40	4.48224	1.05867		40	4.48224	-4.36594
	40	4.49248	1.10144		40	4.49248	-4.59664
	40	4.50272	1.22611		40	4.50272	-4.78299
	40	4.51296	1.3149		40	4.51296	-5.0422
	40	4.5232	1.41275		40	4.5232	-5.33666
	40	4.53344	1.53901		40	4.53344	-5.63575
	40	4.54368	1.68903		40	4.54368	-5.91908
	40	4.55392	1.77352		40	4.55392	-6.21889
	40	4.56416	1.7982		40	4.56416	-6.45682
	40	4.5744	1.89111		40	4.5744	-6.65859
	40	4.58464	2.01691		40	4.58464	-6.99807
	40	4.59488	2.14843		40	4.59488	-7.26787
	40	4.60512	2.2616		40	4.60512	-7.52286
	40	4.61536	2.32339		40	4.61536	-7.78632
	40	4.6256	2.42602		40	4.6256	-8.05515
	40	4.63584	2.53896		40	4.63584	-8.27549
	40	4.64608	2.64339		40	4.64608	-8.47183
	40	4.65632	2.76817		40	4.65632	-8.57053
	40	4.66656	2.92486		40	4.66656	-8.79874
	40	4.6768	3.09661		40	4.6768	-9.09348
	40	4.68704	3.20689		40	4.68704	-9.38374
	40	4.69728	3.2728		40	4.69728	-9.53946
	40	4.70752	3.388		40	4.70752	-9.68997
	40	4.71776	3.57871		40	4.71776	-9.85067
	40	4.728	3.75079		40	4.728	-10.0802
	40	4.73824	3.93647		40	4.73824	-10.2878
	40	4.74848	4.10896		40	4.74848	-10.5251
	40	4.75872	4.34966		40	4.75872	-10.743
	40	4.76896	4.57713		40	4.76896	-10.9029
	40	4.7792	4.86295		40	4.7792	-11.0317
	40	4.78944	5.09069		40	4.78944	-11.2399
	40	4.79968	5.33002		40	4.79968	-11.3847
	40	4.80992	5.56651		40	4.80992	-11.5546
	40	4.82016	5.92945		40	4.82016	-11.6848
	40	4.8304	6.23737		40	4.8304	-11.822
	40	4.84064	6.60108		40	4.84064	-11.8307
	40	4.85088	7.02663		40	4.85088	-11.8616
	40	4.86112	7.55687		40	4.86112	-11.9775
	40	4.87136	8.19576		40	4.87136	-12.0937
	40	4.8816	8.82882		40	4.8816	-12.1792
	40	4.89184	9.40034		40	4.89184	-12.2614
	40	4.90208	10.1197		40	4.90208	-12.3423
	40	4.91232	10.9901		40	4.91232	-12.5215
	40	4.92256	11.9328		40	4.92256	-12.6352
	40	4.9328	13.0555		40	4.9328	-12.6944
	40	4.94304	14.3818		40	4.94304	-12.7303
	40	4.95328	15.5846		40	4.95328	-12.8403
	40	4.96352	17.2104		40	4.96352	-12.8306
	40	4.97376	19.0055		40	4.97376	-12.9718
	40	4.984	20.9266		40	4.984	-13.0358
	40	4.99424	22.9971		40	4.99424	-13.0787
	40	5.00448	25.3009		40	5.00448	-13.1947
	40	5.01472	27.75		40	5.01472	-13.3079
	40	5.02496	30.3081		40	5.02496	-13.4144
	40	5.0352	32.8031		40	5.0352	-13.4346
	40	5.04544	35.4965		40	5.04544	-13.5015
	40	5.05568	38.1649		40	5.05568	-13.5902
	40	5.06592	40.6464		40	5.06592	-13.6284
	40	5.07616	42.9065		40	5.07616	-13.6488
	40	5.0864	44.9285		40	5.0864	-13.6189
	40	5.09664	46.5724		40	5.09664	-13.6594
	40	5.10688	47.4901		40	5.10688	-13.6571
	40	5.11712	47.4196		40	5.11712	-13.6693
	40	5.12736	47.3761		40	5.12736	-13.6903
	40	5.1376	47.533		40	5.1376	-13.7017
	40	5.14784	46.1734		40	5.14784	-13.676
	40	5.15808	45.5725		40	5.15808	-13.6982
	40	5.16832	43.8694		40	5.16832	-13.7128
	40	5.17856	43.0672		40	5.17856	-13.7462
	40	5.1888	41.763		40	5.1888	-13.7529
	40	5.19904	40.765		40	5.19904	-13.7674
	40	5.20928	40.3281		40	5.20928	-13.7815
	40	5.21952	39.5267		40	5.21952	-13.821
	40	5.22976	39.5872		40	5.22976	-13.7681
	40	5.24	37.5925		40	5.24	-13.7484
	40	5.25024	35.4936		40	5.25024	-13.6688
	40	5.26048	33.4675		40	5.26048	-13.6107
	40	5.27072	31.4371		40	5.27072	-13.6607
	40	5.28096	29.3667		40	5.28096	-13.6319
	40	5.2912	27.3766		40	5.2912	-13.5598
	40	5.30144	25.4573		40	5.30144	-13.4574
	40	5.31168	23.6035		40	5.31168	-13.4226
	40	5.32192	21.804		40	5.32192	-13.3485
	40	5.33216	19.9388		40	5.33216	-13.3
	40	5.3424	18.0759		40	5.3424	-13.2243
	40	5.35264	16.3277		40	5.35264	-13.2335
	40	5.36288	14.6973		40	5.36288	-13.0983
	40	5.37312	13.2366		40	5.37312	-12.9595
	40	5.38336	11.8851		40	5.38336	-12.8503
	40	5.3936	10.5853		40	5.3936	-12.7501
	40	5.40384	9.31545		40	5.40384	-12.7759
	40	5.41408	8.08014		40	5.41408	-12.6361
	40	5.42432	6.97243		40	5.42432	-12.4726
	40	5.43456	6.01698		40	5.43456	-12.3278
	40	5.4448	5.15078		40	5.4448	-12.2449
	40	5.45504	4.31757		40	5.45504	-12.1639
	40	5.46528	3.51746		40	5.46528	-12.1461
	40	5.47552	2.75997		40	5.47552	-12
	40	5.48576	2.03582		40	5.48576	-11.8541
	40	5.496	1.36248		40	5.496	-11.697
	40	5.50624	0.718254		40	5.50624	-11.5197
	40	5.51648	0.0709305		40	5.51648	-11.3872
	40	5.52672	-0.470497		40	5.52672	-11.3182
	40	5.53696	-0.924141		40	5.53696	-11.1818
	40	5.5472	-1.36026		40	5.5472	-11.054
	40	5.55744	-1.92574		40	5.55744	-10.8489
	40	5.56768	-2.39774		40	5.56768	-10.668
	40	5.57792	-2.85416		40	5.57792	-10.4856
	40	5.58816	-3.21182		40	5.58816	-10.3039
	40	5.5984	-3.57493		40	5.5984	-10.175
	40	5.60864	-3.78479		40	5.60864	-10.054
	40	5.61888	-4.00912		40	5.61888	-9.91268
	40	5.62912	-4.275		40	5.62912	-9.73145
	40	5.63936	-4.50743		40	5.63936	-9.52563
	40	5.6496	-4.71874		40	5.6496	-9.38921
	40	5.65984	-4.94181		40	5.65984	-9.19853
	40	5.67008	-5.1807		40	5.67008	-9.01646
	40	5.68032	-5.38936		40	5.68032	-8.83321
	40	5.69056	-5.5592		40	5.69056	-8.65385
	40	5.7008	-5.75789		40	5.7008	-8.52351
	40	5.71104	-6.03507		40	5.71104	-8.28194
	40	5.72128	-6.10378		40	5.72128	-8.06172
	40	5.73152	-6.40696		40	5.73152	-7.88503
	40	5.74176	-6.54295		40	5.74176	-7.72659
	40	5.752	-6.7495		40	5.752	-7.59761
	40	5.76224	-6.90028		40	5.76224	-7.44498
	40	5.77248	-7.0406		40	5.77248	-7.2101
	40	5.78272	-7.1685		40	5.78272	-7.05212
	40	5.79296	-7.18232		40	5.79296	-6.91142
	40	5.8032	-7.16769		40	5.8032	-6.68726
	40	5.81344	-7.26183		40	5.81344	-6.50269
	40	5.82368	-7.3642		40	5.82368	-6.32869
	40	5.83392	-7.46702		40	5.83392	-6.15937
	40	5.84416	-7.50561		40	5.84416	-6.043
	40	5.8544	-7.62566		40	5.8544	-5.8365
	40	5.86464	-7.72115		40	5.86464	-5.70589
	40	5.87488	-7.7193		40	5.87488	-5.56887
	40	5.88512	-7.85752		40	5.88512	-5.35481
	40	5.89536	-8.01338		40	5.89536	-5.26122
	40	5.9056	-8.0687		40	5.9056	-5.20914
	40	5.91584	-8.13638		40	5.91584	-5.15352
	40	5.92608	-8.27482		40	5.92608	-5.09782
	40	5.93632	-8.2663		40	5.93632	-5.17155
	40	5.94656	-8.28789		40	5.94656	-5.15255
	40	5.9568	-8.36706		40	5.9568	-4.99319
	40	5.96704	-8.45992		40	5.96704	-4.97136
	40	5.97728	-8.58089		40	5.97728	-4.90747
	40	5.98752	-8.63456		40	5.98752	-4.9188
	40	5.99776	-8.68744		40	5.99776	-4.91844

## Sheet: panel H
	left panel					middle panel					right panel
	Ipsi		Contra			Ipsi		Contra			Ipsi		Contra
	Time (ms)	Vm rel (mV)	Time (ms)	Vm rel (mV)		Time (ms)	Vm rel (mV)	Time (ms)	Vm rel (mV)		Time (ms)	Vm rel (mV)	Time (ms)	Vm rel (mV)
	2.9974	0.0445	2.9974	0.0699		2.9974	-0.0137	2.9974	-0.7004		2.9974	-0.2157	2.9974	0.4674
	3.0077	0.021	3.0077	0.0729		3.0077	-0.0202	3.0077	-0.7247		3.0077	-0.1892	3.0077	0.4254
	3.0179	-0.014	3.0179	0.0612		3.0179	-0.0367	3.0179	-0.753		3.0179	-0.1667	3.0179	0.4003
	3.0282	-0.0417	3.0282	0.0564		3.0282	-0.0501	3.0282	-0.7587		3.0282	-0.1211	3.0282	0.408
	3.0384	-0.0426	3.0384	0.0661		3.0384	-0.033	3.0384	-0.7563		3.0384	-0.1011	3.0384	0.4014
	3.0486	-0.0306	3.0486	0.0905		3.0486	-0.0554	3.0486	-0.732		3.0486	-0.0811	3.0486	0.382
	3.0589	-0.0149	3.0589	0.0966		3.0589	-0.0544	3.0589	-0.7386		3.0589	-0.0649	3.0589	0.3258
	3.0691	-0.0217	3.0691	0.0778		3.0691	-0.0742	3.0691	-0.7384		3.0691	-0.0687	3.0691	0.3072
	3.0794	-0.0417	3.0794	0.0528		3.0794	-0.0775	3.0794	-0.7588		3.0794	-0.0516	3.0794	0.3153
	3.0896	-0.074	3.0896	0.0308		3.0896	-0.1037	3.0896	-0.7652		3.0896	-0.0022	3.0896	0.3114
	3.0998	-0.0747	3.0998	0.0466		3.0998	-0.115	3.0998	-0.7299		3.0998	0.0324	3.0998	0.3007
	3.1101	-0.0641	3.1101	0.0637		3.1101	-0.1106	3.1101	-0.6859		3.1101	0.0338	3.1101	0.2791
	3.1203	-0.0811	3.1203	0.0695		3.1203	-0.1179	3.1203	-0.7141		3.1203	0.044	3.1203	0.2421
	3.1306	-0.0912	3.1306	0.0408		3.1306	-0.1167	3.1306	-0.7085		3.1306	0.0395	3.1306	0.2268
	3.1408	-0.1266	3.1408	-0.0006		3.1408	-0.1297	3.1408	-0.6996		3.1408	0.0428	3.1408	0.2123
	3.151	-0.1544	3.151	-0.0201		3.151	-0.1502	3.151	-0.6675		3.151	0.0711	3.151	0.2083
	3.1613	-0.1411	3.1613	-0.0165		3.1613	-0.1515	3.1613	-0.6578		3.1613	0.0968	3.1613	0.2138
	3.1715	-0.1522	3.1715	-0.0337		3.1715	-0.1475	3.1715	-0.6715		3.1715	0.1126	3.1715	0.1963
	3.1818	-0.1656	3.1818	-0.0322		3.1818	-0.1605	3.1818	-0.6311		3.1818	0.1365	3.1818	0.1861
	3.192	-0.1828	3.192	-0.0387		3.192	-0.1481	3.192	-0.5876		3.192	0.1661	3.192	0.1907
	3.2022	-0.178	3.2022	-0.0164		3.2022	-0.1403	3.2022	-0.5855		3.2022	0.1781	3.2022	0.1577
	3.2125	-0.1919	3.2125	-0.0059		3.2125	-0.1764	3.2125	-0.5944		3.2125	0.2119	3.2125	0.1497
	3.2227	-0.2063	3.2227	-0.0197		3.2227	-0.1736	3.2227	-0.5901		3.2227	0.1977	3.2227	0.1399
	3.233	-0.2256	3.233	-0.0371		3.233	-0.1852	3.233	-0.593		3.233	0.1494	3.233	0.1387
	3.2432	-0.2441	3.2432	-0.0524		3.2432	-0.2131	3.2432	-0.5596		3.2432	0.1388	3.2432	0.1174
	3.2534	-0.2722	3.2534	-0.0667		3.2534	-0.214	3.2534	-0.5067		3.2534	0.1571	3.2534	0.0908
	3.2637	-0.2935	3.2637	-0.0836		3.2637	-0.207	3.2637	-0.5032		3.2637	0.1581	3.2637	0.068
	3.2739	-0.3	3.2739	-0.096		3.2739	-0.185	3.2739	-0.5127		3.2739	0.1454	3.2739	0.0398
	3.2842	-0.3081	3.2842	-0.1059		3.2842	-0.1927	3.2842	-0.5088		3.2842	0.147	3.2842	0.0224
	3.2944	-0.3198	3.2944	-0.1271		3.2944	-0.2006	3.2944	-0.4743		3.2944	0.1274	3.2944	0.0061
	3.3046	-0.3257	3.3046	-0.1046		3.3046	-0.1857	3.3046	-0.453		3.3046	0.1313	3.3046	-0.0107
	3.3149	-0.3055	3.3149	-0.0872		3.3149	-0.1762	3.3149	-0.4431		3.3149	0.1217	3.3149	-0.0231
	3.3251	-0.3261	3.3251	-0.0975		3.3251	-0.1765	3.3251	-0.4303		3.3251	0.1538	3.3251	-0.0161
	3.3354	-0.3528	3.3354	-0.1116		3.3354	-0.1771	3.3354	-0.4152		3.3354	0.1413	3.3354	-0.0293
	3.3456	-0.3542	3.3456	-0.1242		3.3456	-0.1598	3.3456	-0.4112		3.3456	0.1294	3.3456	-0.0453
	3.3558	-0.3508	3.3558	-0.1317		3.3558	-0.1465	3.3558	-0.4023		3.3558	0.1099	3.3558	-0.0489
	3.3661	-0.3631	3.3661	-0.1206		3.3661	-0.1524	3.3661	-0.3853		3.3661	0.1412	3.3661	-0.0651
	3.3763	-0.364	3.3763	-0.1257		3.3763	-0.1495	3.3763	-0.3759		3.3763	0.1306	3.3763	-0.0604
	3.3866	-0.3451	3.3866	-0.0647		3.3866	-0.143	3.3866	-0.4021		3.3866	0.1326	3.3866	-0.0499
	3.3968	-0.3251	3.3968	-0.0043		3.3968	-0.1417	3.3968	-0.3958		3.3968	0.1243	3.3968	-0.0686
	3.407	-0.3178	3.407	0.0179		3.407	-0.1186	3.407	-0.3891		3.407	0.1136	3.407	-0.0721
	3.4173	-0.341	3.4173	0.0042		3.4173	-0.1035	3.4173	-0.3998		3.4173	0.1362	3.4173	-0.0769
	3.4275	-0.3642	3.4275	-0.0263		3.4275	-0.0791	3.4275	-0.4108		3.4275	0.1447	3.4275	-0.066
	3.4378	-0.3706	3.4378	-0.0252		3.4378	-0.0886	3.4378	-0.4424		3.4378	0.1912	3.4378	-0.069
	3.448	-0.3413	3.448	-0.0434		3.448	-0.0744	3.448	-0.4584		3.448	0.2169	3.448	-0.0746
	3.4582	-0.3129	3.4582	-0.0532		3.4582	-0.0456	3.4582	-0.4706		3.4582	0.204	3.4582	-0.0745
	3.4685	-0.2992	3.4685	-0.0555		3.4685	-0.0354	3.4685	-0.4751		3.4685	0.2117	3.4685	-0.0866
	3.4787	-0.2586	3.4787	-0.0368		3.4787	-0.003	3.4787	-0.4764		3.4787	0.2369	3.4787	-0.0887
	3.489	-0.2105	3.489	-0.0381		3.489	0.0381	3.489	-0.5043		3.489	0.2252	3.489	-0.1019
	3.4992	-0.1852	3.4992	-0.0222		3.4992	0.0709	3.4992	-0.5074		3.4992	0.2469	3.4992	-0.1489
	3.5094	-0.1768	3.5094	-0.0244		3.5094	0.0748	3.5094	-0.4992		3.5094	0.269	3.5094	-0.1711
	3.5197	-0.1702	3.5197	-0.0554		3.5197	0.072	3.5197	-0.4889		3.5197	0.2878	3.5197	-0.169
	3.5299	-0.124	3.5299	-0.0689		3.5299	0.065	3.5299	-0.4898		3.5299	0.2893	3.5299	-0.1379
	3.5402	-0.0885	3.5402	-0.035		3.5402	0.0669	3.5402	-0.4692		3.5402	0.2781	3.5402	-0.1274
	3.5504	-0.0528	3.5504	-0.0157		3.5504	0.0866	3.5504	-0.4627		3.5504	0.2966	3.5504	-0.1369
	3.5606	-0.0287	3.5606	0.0147		3.5606	0.1009	3.5606	-0.4632		3.5606	0.3106	3.5606	-0.1504
	3.5709	0.0199	3.5709	0.0262		3.5709	0.1153	3.5709	-0.4566		3.5709	0.2921	3.5709	-0.1598
	3.5811	0.0721	3.5811	0.0445		3.5811	0.1395	3.5811	-0.4057		3.5811	0.2861	3.5811	-0.1639
	3.5914	0.1074	3.5914	0.0464		3.5914	0.1645	3.5914	-0.369		3.5914	0.3209	3.5914	-0.1567
	3.6016	0.1336	3.6016	0.0529		3.6016	0.1842	3.6016	-0.3671		3.6016	0.3268	3.6016	-0.1677
	3.6118	0.1603	3.6118	0.051		3.6118	0.2041	3.6118	-0.3971		3.6118	0.3239	3.6118	-0.1897
	3.6221	0.1965	3.6221	0.0545		3.6221	0.2156	3.6221	-0.4204		3.6221	0.3349	3.6221	-0.2068
	3.6323	0.1871	3.6323	0.0933		3.6323	0.2441	3.6323	-0.4418		3.6323	0.3031	3.6323	-0.2052
	3.6426	0.208	3.6426	0.0857		3.6426	0.2638	3.6426	-0.4649		3.6426	0.2819	3.6426	-0.226
	3.6528	0.2426	3.6528	0.0913		3.6528	0.2689	3.6528	-0.4828		3.6528	0.2571	3.6528	-0.2591
	3.663	0.3036	3.663	0.0862		3.663	0.285	3.663	-0.4554		3.663	0.2401	3.663	-0.2898
	3.6733	0.3599	3.6733	0.0975		3.6733	0.2977	3.6733	-0.4203		3.6733	0.2231	3.6733	-0.3404
	3.6835	0.3805	3.6835	0.1286		3.6835	0.3065	3.6835	-0.3914		3.6835	0.2336	3.6835	-0.4016
	3.6938	0.4109	3.6938	0.1288		3.6938	0.3276	3.6938	-0.3762		3.6938	0.2186	3.6938	-0.412
	3.704	0.409	3.704	0.1467		3.704	0.3338	3.704	-0.3879		3.704	0.2187	3.704	-0.3811
	3.7142	0.4246	3.7142	0.1656		3.7142	0.3484	3.7142	-0.3739		3.7142	0.2193	3.7142	-0.3559
	3.7245	0.4528	3.7245	0.1999		3.7245	0.3504	3.7245	-0.3554		3.7245	0.2255	3.7245	-0.3928
	3.7347	0.4691	3.7347	0.1979		3.7347	0.3223	3.7347	-0.3464		3.7347	0.1986	3.7347	-0.408
	3.745	0.4804	3.745	0.1833		3.745	0.322	3.745	-0.3128		3.745	0.2018	3.745	-0.378
	3.7552	0.5187	3.7552	0.2113		3.7552	0.3148	3.7552	-0.3114		3.7552	0.1742	3.7552	-0.3242
	3.7654	0.5275	3.7654	0.208		3.7654	0.353	3.7654	-0.3022		3.7654	0.1331	3.7654	-0.3109
	3.7757	0.5048	3.7757	0.2203		3.7757	0.3567	3.7757	-0.2753		3.7757	0.1408	3.7757	-0.3209
	3.7859	0.5111	3.7859	0.2408		3.7859	0.375	3.7859	-0.2456		3.7859	0.1576	3.7859	-0.3222
	3.7962	0.5744	3.7962	0.254		3.7962	0.3916	3.7962	-0.2158		3.7962	0.165	3.7962	-0.339
	3.8064	0.6066	3.8064	0.2432		3.8064	0.3934	3.8064	-0.2231		3.8064	0.1494	3.8064	-0.3458
	3.8166	0.6204	3.8166	0.2218		3.8166	0.4168	3.8166	-0.2037		3.8166	0.1237	3.8166	-0.3496
	3.8269	0.6248	3.8269	0.2156		3.8269	0.4482	3.8269	-0.1833		3.8269	0.1206	3.8269	-0.3641
	3.8371	0.6517	3.8371	0.2261		3.8371	0.4438	3.8371	-0.1565		3.8371	0.1077	3.8371	-0.3529
	3.8474	0.6703	3.8474	0.249		3.8474	0.4356	3.8474	-0.1202		3.8474	0.0971	3.8474	-0.351
	3.8576	0.6805	3.8576	0.2331		3.8576	0.4314	3.8576	-0.0995		3.8576	0.1151	3.8576	-0.3687
	3.8678	0.7024	3.8678	0.2273		3.8678	0.4304	3.8678	-0.0974		3.8678	0.0955	3.8678	-0.3868
	3.8781	0.7502	3.8781	0.2338		3.8781	0.4287	3.8781	-0.0874		3.8781	0.085	3.8781	-0.3826
	3.8883	0.7537	3.8883	0.2468		3.8883	0.4604	3.8883	-0.075		3.8883	0.0835	3.8883	-0.365
	3.8986	0.7407	3.8986	0.2478		3.8986	0.4676	3.8986	-0.0452		3.8986	0.0881	3.8986	-0.3624
	3.9088	0.7308	3.9088	0.2577		3.9088	0.4779	3.9088	-0.0115		3.9088	0.0835	3.9088	-0.3763
	3.919	0.7139	3.919	0.2611		3.919	0.4933	3.919	0.0333		3.919	0.0767	3.919	-0.3824
	3.9293	0.7224	3.9293	0.2288		3.9293	0.5009	3.9293	0.0523		3.9293	0.0801	3.9293	-0.3581
	3.9395	0.722	3.9395	0.1997		3.9395	0.5042	3.9395	0.079		3.9395	0.0905	3.9395	-0.3389
	3.9498	0.7199	3.9498	0.1418		3.9498	0.5255	3.9498	0.114		3.9498	0.0812	3.9498	-0.312
	3.96	0.7162	3.96	0.1611		3.96	0.5716	3.96	0.1655		3.96	0.0582	3.96	-0.2898
	3.9702	0.701	3.9702	0.1602		3.9702	0.6013	3.9702	0.1917		3.9702	0.095	3.9702	-0.3025
	3.9805	0.7299	3.9805	0.1668		3.9805	0.6075	3.9805	0.193		3.9805	0.1059	3.9805	-0.3188
	3.9907	0.7831	3.9907	0.1705		3.9907	0.6135	3.9907	0.2184		3.9907	0.1062	3.9907	-0.3303
	4.001	0.8078	4.001	0.1608		4.001	0.645	4.001	0.2406		4.001	0.1239	4.001	-0.3381
	4.0112	0.8283	4.0112	0.1489		4.0112	0.6692	4.0112	0.2583		4.0112	0.1355	4.0112	-0.3316
	4.0214	0.8186	4.0214	0.1289		4.0214	0.6706	4.0214	0.2996		4.0214	0.1388	4.0214	-0.3286
	4.0317	0.8355	4.0317	0.1258		4.0317	0.6419	4.0317	0.3245		4.0317	0.1363	4.0317	-0.3053
	4.0419	0.8702	4.0419	0.1326		4.0419	0.6412	4.0419	0.3433		4.0419	0.1575	4.0419	-0.2857
	4.0522	0.8892	4.0522	0.145		4.0522	0.6347	4.0522	0.3631		4.0522	0.2071	4.0522	-0.277
	4.0624	0.9198	4.0624	0.1478		4.0624	0.6467	4.0624	0.3861		4.0624	0.2312	4.0624	-0.2602
	4.0726	0.9434	4.0726	0.1291		4.0726	0.6509	4.0726	0.413		4.0726	0.2044	4.0726	-0.239
	4.0829	0.9479	4.0829	0.1089		4.0829	0.6793	4.0829	0.4557		4.0829	0.1917	4.0829	-0.1957
	4.0931	0.9383	4.0931	0.1		4.0931	0.6678	4.0931	0.532		4.0931	0.1845	4.0931	-0.1635
	4.1034	0.9343	4.1034	0.0847		4.1034	0.6622	4.1034	0.5969		4.1034	0.1743	4.1034	-0.1765
	4.1136	0.9571	4.1136	0.0836		4.1136	0.6755	4.1136	0.6461		4.1136	0.1758	4.1136	-0.152
	4.1238	0.9737	4.1238	0.0932		4.1238	0.6905	4.1238	0.6777		4.1238	0.2035	4.1238	-0.1085
	4.1341	0.9697	4.1341	0.1359		4.1341	0.7004	4.1341	0.668		4.1341	0.2125	4.1341	-0.0772
	4.1443	0.9898	4.1443	0.1391		4.1443	0.6967	4.1443	0.6666		4.1443	0.2053	4.1443	-0.0713
	4.1546	1.0152	4.1546	0.1291		4.1546	0.6938	4.1546	0.682		4.1546	0.2087	4.1546	-0.0215
	4.1648	1.0208	4.1648	0.1081		4.1648	0.7098	4.1648	0.7213		4.1648	0.2377	4.1648	0.0093
	4.175	1.0221	4.175	0.1116		4.175	0.7243	4.175	0.7603		4.175	0.2641	4.175	0.0074
	4.1853	1.0452	4.1853	0.1495		4.1853	0.7209	4.1853	0.7626		4.1853	0.2916	4.1853	0.0237
	4.1955	1.0436	4.1955	0.1854		4.1955	0.72	4.1955	0.7734		4.1955	0.2898	4.1955	0.0186
	4.2058	1.0524	4.2058	0.1596		4.2058	0.7002	4.2058	0.7973		4.2058	0.2912	4.2058	0.0243
	4.216	1.0737	4.216	0.1594		4.216	0.7294	4.216	0.8298		4.216	0.2976	4.216	0.0655
	4.2262	1.0931	4.2262	0.1904		4.2262	0.7486	4.2262	0.8588		4.2262	0.3116	4.2262	0.0794
	4.2365	1.1028	4.2365	0.2339		4.2365	0.7306	4.2365	0.8437		4.2365	0.3299	4.2365	0.0506
	4.2467	1.1398	4.2467	0.2411		4.2467	0.7413	4.2467	0.8403		4.2467	0.3526	4.2467	0.0566
	4.257	1.1587	4.257	0.2327		4.257	0.7352	4.257	0.866		4.257	0.3654	4.257	0.0534
	4.2672	1.1402	4.2672	0.229		4.2672	0.7492	4.2672	0.8589		4.2672	0.3961	4.2672	0.0415
	4.2774	1.1647	4.2774	0.2388		4.2774	0.7844	4.2774	0.8822		4.2774	0.4146	4.2774	0.0351
	4.2877	1.2071	4.2877	0.2672		4.2877	0.7932	4.2877	0.8879		4.2877	0.4688	4.2877	0.0515
	4.2979	1.2474	4.2979	0.2874		4.2979	0.8089	4.2979	0.9134		4.2979	0.4833	4.2979	0.069
	4.3082	1.2428	4.3082	0.3152		4.3082	0.8158	4.3082	0.9172		4.3082	0.4724	4.3082	0.0667
	4.3184	1.26	4.3184	0.2936		4.3184	0.8178	4.3184	0.9207		4.3184	0.466	4.3184	0.0615
	4.3286	1.2785	4.3286	0.2779		4.3286	0.7848	4.3286	0.9255		4.3286	0.482	4.3286	0.0636
	4.3389	1.2968	4.3389	0.2881		4.3389	0.7711	4.3389	0.9343		4.3389	0.5133	4.3389	0.0386
	4.3491	1.3125	4.3491	0.2995		4.3491	0.7655	4.3491	0.9415		4.3491	0.526	4.3491	0.0071
	4.3594	1.3127	4.3594	0.3072		4.3594	0.7586	4.3594	0.9167		4.3594	0.5726	4.3594	0.0096
	4.3696	1.3316	4.3696	0.2925		4.3696	0.7647	4.3696	0.9022		4.3696	0.6034	4.3696	0.0152
	4.3798	1.3409	4.3798	0.2855		4.3798	0.7527	4.3798	0.8961		4.3798	0.6126	4.3798	0.0252
	4.3901	1.3441	4.3901	0.3227		4.3901	0.7385	4.3901	0.8902		4.3901	0.6269	4.3901	0.03
	4.4003	1.3542	4.4003	0.3512		4.4003	0.7209	4.4003	0.8658		4.4003	0.6461	4.4003	0.0402
	4.4106	1.347	4.4106	0.3121		4.4106	0.7288	4.4106	0.9008		4.4106	0.6438	4.4106	0.017
	4.4208	1.329	4.4208	0.2891		4.4208	0.7431	4.4208	0.9254		4.4208	0.6574	4.4208	-0.0036
	4.431	1.3182	4.431	0.2778		4.431	0.7303	4.431	0.904		4.431	0.6696	4.431	-0.0188
	4.4413	1.3219	4.4413	0.2809		4.4413	0.6926	4.4413	0.8873		4.4413	0.668	4.4413	-0.0505
	4.4515	1.3395	4.4515	0.2681		4.4515	0.6695	4.4515	0.888		4.4515	0.6637	4.4515	-0.0571
	4.4618	1.3301	4.4618	0.2412		4.4618	0.6815	4.4618	0.8607		4.4618	0.6786	4.4618	-0.0545
	4.472	1.3414	4.472	0.2455		4.472	0.6979	4.472	0.8258		4.472	0.6906	4.472	-0.0576
	4.4822	1.3503	4.4822	0.2594		4.4822	0.6932	4.4822	0.7717		4.4822	0.6879	4.4822	-0.0614
	4.4925	1.3611	4.4925	0.2746		4.4925	0.711	4.4925	0.7497		4.4925	0.6987	4.4925	-0.027
	4.5027	1.3782	4.5027	0.2875		4.5027	0.7098	4.5027	0.7186		4.5027	0.7118	4.5027	0.024
	4.513	1.3735	4.513	0.2767		4.513	0.6863	4.513	0.7		4.513	0.7012	4.513	0.0353
	4.5232	1.3875	4.5232	0.2276		4.5232	0.6455	4.5232	0.6655		4.5232	0.7107	4.5232	0.0261
	4.5334	1.3439	4.5334	0.232		4.5334	0.6223	4.5334	0.6616		4.5334	0.7087	4.5334	0.0124
	4.5437	1.3527	4.5437	0.2076		4.5437	0.6192	4.5437	0.6276		4.5437	0.7018	4.5437	0.0229
	4.5539	1.372	4.5539	0.196		4.5539	0.5964	4.5539	0.5816		4.5539	0.7211	4.5539	0.0537
	4.5642	1.3801	4.5642	0.1757		4.5642	0.5977	4.5642	0.556		4.5642	0.7474	4.5642	0.0671
	4.5744	1.4016	4.5744	0.2019		4.5744	0.5968	4.5744	0.5223		4.5744	0.746	4.5744	0.0655
	4.5846	1.4104	4.5846	0.222		4.5846	0.5815	4.5846	0.5015		4.5846	0.7412	4.5846	0.0911
	4.5949	1.4056	4.5949	0.2133		4.5949	0.5752	4.5949	0.444		4.5949	0.7133	4.5949	0.1114
	4.6051	1.4107	4.6051	0.196		4.6051	0.5387	4.6051	0.4144		4.6051	0.7128	4.6051	0.165
	4.6154	1.3854	4.6154	0.2053		4.6154	0.4998	4.6154	0.3977		4.6154	0.7083	4.6154	0.1965
	4.6256	1.3932	4.6256	0.1765		4.6256	0.4553	4.6256	0.3711		4.6256	0.7183	4.6256	0.2304
	4.6358	1.399	4.6358	0.115		4.6358	0.3777	4.6358	0.3581		4.6358	0.7379	4.6358	0.253
	4.6461	1.3874	4.6461	0.1082		4.6461	0.3293	4.6461	0.3119		4.6461	0.7537	4.6461	0.2502
	4.6563	1.3945	4.6563	0.1359		4.6563	0.3155	4.6563	0.2788		4.6563	0.7508	4.6563	0.2839
	4.6666	1.397	4.6666	0.1253		4.6666	0.3042	4.6666	0.2635		4.6666	0.7548	4.6666	0.2782
	4.6768	1.4035	4.6768	0.1179		4.6768	0.2565	4.6768	0.241		4.6768	0.7729	4.6768	0.3269
	4.687	1.403	4.687	0.1538		4.687	0.2517	4.687	0.2413		4.687	0.7592	4.687	0.3893
	4.6973	1.3939	4.6973	0.1605		4.6973	0.2219	4.6973	0.2236		4.6973	0.755	4.6973	0.4254
	4.7075	1.3955	4.7075	0.1648		4.7075	0.1827	4.7075	0.2004		4.7075	0.7491	4.7075	0.4143
	4.7178	1.4158	4.7178	0.1662		4.7178	0.1732	4.7178	0.1768		4.7178	0.7289	4.7178	0.4139
	4.728	1.4273	4.728	0.1403		4.728	0.1602	4.728	0.1475		4.728	0.7266	4.728	0.4148
	4.7382	1.4414	4.7382	0.1365		4.7382	0.1132	4.7382	0.1308		4.7382	0.7435	4.7382	0.422
	4.7485	1.4469	4.7485	0.1579		4.7485	0.0981	4.7485	0.1282		4.7485	0.7212	4.7485	0.4128
	4.7587	1.4515	4.7587	0.1696		4.7587	0.0997	4.7587	0.1239		4.7587	0.7064	4.7587	0.3913
	4.769	1.4346	4.769	0.1712		4.769	0.0829	4.769	0.0931		4.769	0.6669	4.769	0.4004
	4.7792	1.4703	4.7792	0.1767		4.7792	0.0353	4.7792	0.0891		4.7792	0.6667	4.7792	0.4182
	4.7894	1.5119	4.7894	0.162		4.7894	0.0107	4.7894	0.07		4.7894	0.6382	4.7894	0.4232
	4.7997	1.4968	4.7997	0.1479		4.7997	-0.0089	4.7997	0.0572		4.7997	0.6327	4.7997	0.3926
	4.8099	1.4879	4.8099	0.1525		4.8099	-0.0338	4.8099	0.0577		4.8099	0.633	4.8099	0.3939
	4.8202	1.4638	4.8202	0.1579		4.8202	-0.0676	4.8202	0.0567		4.8202	0.6428	4.8202	0.3887
	4.8304	1.4426	4.8304	0.1461		4.8304	-0.1191	4.8304	0.0553		4.8304	0.6273	4.8304	0.4046
	4.8406	1.4257	4.8406	0.1327		4.8406	-0.1279	4.8406	0.0419		4.8406	0.6212	4.8406	0.4245
	4.8509	1.438	4.8509	0.1201		4.8509	-0.1347	4.8509	0.0117		4.8509	0.6076	4.8509	0.4066
	4.8611	1.4339	4.8611	0.121		4.8611	-0.1652	4.8611	-0.0107		4.8611	0.6042	4.8611	0.3932
	4.8714	1.4423	4.8714	0.1187		4.8714	-0.1832	4.8714	-0.0198		4.8714	0.6174	4.8714	0.3706
	4.8816	1.4583	4.8816	0.0845		4.8816	-0.1849	4.8816	-0.0431		4.8816	0.6321	4.8816	0.3317
	4.8918	1.4735	4.8918	0.0637		4.8918	-0.1939	4.8918	-0.0831		4.8918	0.6199	4.8918	0.2975
	4.9021	1.4633	4.9021	0.0748		4.9021	-0.2122	4.9021	-0.0949		4.9021	0.6274	4.9021	0.2754
	4.9123	1.463	4.9123	0.0849		4.9123	-0.2385	4.9123	-0.11		4.9123	0.6496	4.9123	0.2471
	4.9226	1.4528	4.9226	0.0746		4.9226	-0.2181	4.9226	-0.1463		4.9226	0.6457	4.9226	0.2138
	4.9328	1.4464	4.9328	0.0772		4.9328	-0.2332	4.9328	-0.1814		4.9328	0.6481	4.9328	0.1817
	4.943	1.4514	4.943	0.0687		4.943	-0.2353	4.943	-0.2191		4.943	0.6501	4.943	0.1193
	4.9533	1.44	4.9533	0.0386		4.9533	-0.2538	4.9533	-0.2504		4.9533	0.6274	4.9533	0.0427
	4.9635	1.4712	4.9635	0.0417		4.9635	-0.2399	4.9635	-0.2586		4.9635	0.6409	4.9635	-0.0474
	4.9738	1.4508	4.9738	0.0184		4.9738	-0.2534	4.9738	-0.2932		4.9738	0.6391	4.9738	-0.1228
	4.984	1.4683	4.984	0.0147		4.984	-0.2614	4.984	-0.3116		4.984	0.6368	4.984	-0.1958
	4.9942	1.474	4.9942	-0.0044		4.9942	-0.2478	4.9942	-0.3298		4.9942	0.6585	4.9942	-0.2785
	5.0045	1.4891	5.0045	0.0011		5.0045	-0.2208	5.0045	-0.3196		5.0045	0.6827	5.0045	-0.3967
	5.0147	1.4795	5.0147	0.0596		5.0147	-0.1939	5.0147	-0.356		5.0147	0.6898	5.0147	-0.5089
	5.025	1.4685	5.025	0.0879		5.025	-0.1885	5.025	-0.3911		5.025	0.6957	5.025	-0.6458
	5.0352	1.4803	5.0352	0.0769		5.0352	-0.1788	5.0352	-0.4063		5.0352	0.731	5.0352	-0.7775
	5.0454	1.495	5.0454	0.0632		5.0454	-0.1803	5.0454	-0.4609		5.0454	0.7326	5.0454	-0.9291
	5.0557	1.5285	5.0557	0.0166		5.0557	-0.1677	5.0557	-0.5003		5.0557	0.7127	5.0557	-1.0659
	5.0659	1.5495	5.0659	0.0001		5.0659	-0.1192	5.0659	-0.5365		5.0659	0.7048	5.0659	-1.2146
	5.0762	1.5614	5.0762	-0.0304		5.0762	-0.1051	5.0762	-0.5737		5.0762	0.7016	5.0762	-1.3537
	5.0864	1.5775	5.0864	-0.0396		5.0864	-0.0975	5.0864	-0.6268		5.0864	0.7441	5.0864	-1.4864
	5.0966	1.5889	5.0966	-0.0219		5.0966	-0.0914	5.0966	-0.6903		5.0966	0.7515	5.0966	-1.6726
	5.1069	1.6168	5.1069	-0.0266		5.1069	-0.0636	5.1069	-0.7738		5.1069	0.7618	5.1069	-1.8782
	5.1171	1.6516	5.1171	-0.0506		5.1171	-0.0104	5.1171	-0.8558		5.1171	0.749	5.1171	-2.0707
	5.1274	1.7033	5.1274	-0.0827		5.1274	0.0198	5.1274	-0.9042		5.1274	0.7483	5.1274	-2.2244
	5.1376	1.7546	5.1376	-0.1113		5.1376	0.0554	5.1376	-0.9322		5.1376	0.7514	5.1376	-2.4163
	5.1478	1.7958	5.1478	-0.1263		5.1478	0.0961	5.1478	-0.9947		5.1478	0.7522	5.1478	-2.593
	5.1581	1.8552	5.1581	-0.132		5.1581	0.1376	5.1581	-1.1115		5.1581	0.758	5.1581	-2.7697
	5.1683	1.9024	5.1683	-0.155		5.1683	0.2118	5.1683	-1.2167		5.1683	0.7748	5.1683	-2.9973
	5.1786	1.9732	5.1786	-0.1563		5.1786	0.2591	5.1786	-1.3417		5.1786	0.7893	5.1786	-3.2073
	5.1888	2.0973	5.1888	-0.1895		5.1888	0.312	5.1888	-1.4791		5.1888	0.8023	5.1888	-3.3966
	5.199	2.1998	5.199	-0.1845		5.199	0.37	5.199	-1.6275		5.199	0.8313	5.199	-3.5437
	5.2093	2.3003	5.2093	-0.1848		5.2093	0.4577	5.2093	-1.7551		5.2093	0.8445	5.2093	-3.7074
	5.2195	2.4126	5.2195	-0.1969		5.2195	0.5456	5.2195	-1.8333		5.2195	0.867	5.2195	-3.8756
	5.2298	2.5396	5.2298	-0.1958		5.2298	0.6373	5.2298	-1.9412		5.2298	0.8728	5.2298	-3.9995
	5.24	2.671	5.24	-0.1985		5.24	0.7542	5.24	-2.0777		5.24	0.8488	5.24	-4.1153
	5.2502	2.8159	5.2502	-0.2258		5.2502	0.86	5.2502	-2.2228		5.2502	0.8415	5.2502	-4.2312
	5.2605	2.9576	5.2605	-0.2742		5.2605	0.9911	5.2605	-2.3716		5.2605	0.8709	5.2605	-4.3587
	5.2707	3.1053	5.2707	-0.2964		5.2707	1.1067	5.2707	-2.5187		5.2707	0.8777	5.2707	-4.4997
	5.281	3.2665	5.281	-0.3008		5.281	1.208	5.281	-2.6347		5.281	0.8865	5.281	-4.6128
	5.2912	3.4464	5.2912	-0.307		5.2912	1.283	5.2912	-2.746		5.2912	0.898	5.2912	-4.7079
	5.3014	3.6323	5.3014	-0.3199		5.3014	1.4233	5.3014	-2.8448		5.3014	0.9025	5.3014	-4.8449
	5.3117	3.8374	5.3117	-0.3268		5.3117	1.5612	5.3117	-2.9526		5.3117	0.9358	5.3117	-4.9729
	5.3219	4.0412	5.3219	-0.3458		5.3219	1.7141	5.3219	-3.101		5.3219	0.944	5.3219	-5.049
	5.3322	4.2387	5.3322	-0.4065		5.3322	1.8765	5.3322	-3.2902		5.3322	0.9788	5.3322	-5.118
	5.3424	4.4403	5.3424	-0.412		5.3424	2.0364	5.3424	-3.4649		5.3424	0.9983	5.3424	-5.2013
	5.3526	4.6379	5.3526	-0.4251		5.3526	2.2222	5.3526	-3.6187		5.3526	1.0334	5.3526	-5.2711
	5.3629	4.8191	5.3629	-0.4312		5.3629	2.3937	5.3629	-3.7794		5.3629	1.0454	5.3629	-5.3375
	5.3731	5.0019	5.3731	-0.4387		5.3731	2.5649	5.3731	-3.8807		5.3731	1.0616	5.3731	-5.3972
	5.3834	5.2132	5.3834	-0.433		5.3834	2.7674	5.3834	-4.0033		5.3834	1.1	5.3834	-5.4626
	5.3936	5.4534	5.3936	-0.4643		5.3936	2.9702	5.3936	-4.1243		5.3936	1.1433	5.3936	-5.5426
	5.4038	5.7017	5.4038	-0.4516		5.4038	3.1915	5.4038	-4.2409		5.4038	1.175	5.4038	-5.5681
	5.4141	5.948	5.4141	-0.4597		5.4141	3.3831	5.4141	-4.3301		5.4141	1.2004	5.4141	-5.5992
	5.4243	6.1734	5.4243	-0.5026		5.4243	3.6164	5.4243	-4.4305		5.4243	1.224	5.4243	-5.6533
	5.4346	6.4119	5.4346	-0.5482		5.4346	3.8413	5.4346	-4.5426		5.4346	1.2311	5.4346	-5.7082
	5.4448	6.6884	5.4448	-0.6023		5.4448	4.0676	5.4448	-4.6467		5.4448	1.2633	5.4448	-5.753
	5.455	6.9825	5.455	-0.662		5.455	4.3227	5.455	-4.7562		5.455	1.2956	5.455	-5.7762
	5.4653	7.2719	5.4653	-0.7112		5.4653	4.5735	5.4653	-4.874		5.4653	1.329	5.4653	-5.7693
	5.4755	7.5886	5.4755	-0.7321		5.4755	4.8188	5.4755	-4.9828		5.4755	1.3383	5.4755	-5.7736
	5.4858	7.9068	5.4858	-0.7769		5.4858	5.0514	5.4858	-5.0726		5.4858	1.4018	5.4858	-5.7818
	5.496	8.2536	5.496	-0.8329		5.496	5.2946	5.496	-5.1621		5.496	1.4217	5.496	-5.8221
	5.5062	8.6332	5.5062	-0.87		5.5062	5.5494	5.5062	-5.2624		5.5062	1.4683	5.5062	-5.8438
	5.5165	9.0174	5.5165	-0.9262		5.5165	5.8125	5.5165	-5.3556		5.5165	1.5267	5.5165	-5.8395
	5.5267	9.4001	5.5267	-0.9601		5.5267	6.0891	5.5267	-5.4081		5.5267	1.5695	5.5267	-5.803
	5.537	9.78	5.537	-1.0061		5.537	6.3726	5.537	-5.4629		5.537	1.6268	5.537	-5.7999
	5.5472	10.1965	5.5472	-1.0299		5.5472	6.6719	5.5472	-5.5433		5.5472	1.69	5.5472	-5.7945
	5.5574	10.5828	5.5574	-1.0795		5.5574	6.9581	5.5574	-5.643		5.5574	1.7316	5.5574	-5.7835
	5.5677	10.9718	5.5677	-1.1159		5.5677	7.293	5.5677	-5.7254		5.5677	1.7754	5.5677	-5.8077
	5.5779	11.3838	5.5779	-1.1623		5.5779	7.6651	5.5779	-5.7461		5.5779	1.8312	5.5779	-5.8166
	5.5882	11.8094	5.5882	-1.2165		5.5882	8.0518	5.5882	-5.7985		5.5882	1.8923	5.5882	-5.8215
	5.5984	12.183	5.5984	-1.2795		5.5984	8.4819	5.5984	-5.8278		5.5984	1.9484	5.5984	-5.8306
	5.6086	12.6105	5.6086	-1.3347		5.6086	8.9098	5.6086	-5.8883		5.6086	2.0367	5.6086	-5.8232
	5.6189	13.0728	5.6189	-1.4187		5.6189	9.3709	5.6189	-5.9517		5.6189	2.1043	5.6189	-5.836
	5.6291	13.5168	5.6291	-1.4763		5.6291	9.8251	5.6291	-6.0139		5.6291	2.1925	5.6291	-5.8256
	5.6394	13.9923	5.6394	-1.5063		5.6394	10.3256	5.6394	-6.0722		5.6394	2.2792	5.6394	-5.8136
	5.6496	14.4603	5.6496	-1.5553		5.6496	10.8402	5.6496	-6.075		5.6496	2.3488	5.6496	-5.8131
	5.6598	14.908	5.6598	-1.6147		5.6598	11.3424	5.6598	-6.1007		5.6598	2.4263	5.6598	-5.809
	5.6701	15.3387	5.6701	-1.6553		5.6701	11.8672	5.6701	-6.1198		5.6701	2.5125	5.6701	-5.7932
	5.6803	15.7306	5.6803	-1.6821		5.6803	12.4006	5.6803	-6.1342		5.6803	2.5959	5.6803	-5.7734
	5.6906	16.1024	5.6906	-1.7361		5.6906	12.9491	5.6906	-6.171		5.6906	2.7106	5.6906	-5.7076
	5.7008	16.4363	5.7008	-1.7974		5.7008	13.4989	5.7008	-6.1742		5.7008	2.8248	5.7008	-5.6383
	5.711	16.7321	5.711	-1.8369		5.711	14.0325	5.711	-6.1565		5.711	2.9194	5.711	-5.6034
	5.7213	17.0164	5.7213	-1.8868		5.7213	14.5507	5.7213	-6.1591		5.7213	3.0302	5.7213	-5.5876
	5.7315	17.2517	5.7315	-1.9389		5.7315	15.0273	5.7315	-6.1695		5.7315	3.1534	5.7315	-5.5508
	5.7418	17.467	5.7418	-1.9949		5.7418	15.4748	5.7418	-6.1911		5.7418	3.2777	5.7418	-5.5237
	5.752	17.5938	5.752	-2.0674		5.752	15.9391	5.752	-6.2255		5.752	3.3717	5.752	-5.4744
	5.7622	17.6932	5.7622	-2.1101		5.7622	16.3602	5.7622	-6.2881		5.7622	3.4808	5.7622	-5.4689
	5.7725	17.731	5.7725	-2.1619		5.7725	16.7555	5.7725	-6.2987		5.7725	3.6428	5.7725	-5.4412
	5.7827	17.7417	5.7827	-2.191		5.7827	17.1395	5.7827	-6.3055		5.7827	3.7538	5.7827	-5.4148
	5.793	17.6881	5.793	-2.2447		5.793	17.5072	5.793	-6.3152		5.793	3.8454	5.793	-5.4226
	5.8032	17.5886	5.8032	-2.3108		5.8032	17.8447	5.8032	-6.2959		5.8032	3.9548	5.8032	-5.3794
	5.8134	17.4749	5.8134	-2.3597		5.8134	18.1337	5.8134	-6.2823		5.8134	4.0497	5.8134	-5.3303
	5.8237	17.3002	5.8237	-2.4188		5.8237	18.3824	5.8237	-6.28		5.8237	4.1752	5.8237	-5.3185
	5.8339	17.0898	5.8339	-2.4612		5.8339	18.5598	5.8339	-6.2676		5.8339	4.3077	5.8339	-5.2742
	5.8442	16.8337	5.8442	-2.4948		5.8442	18.7184	5.8442	-6.2523		5.8442	4.4198	5.8442	-5.2281
	5.8544	16.5059	5.8544	-2.4871		5.8544	18.8585	5.8544	-6.2303		5.8544	4.5123	5.8544	-5.2045
	5.8646	16.1983	5.8646	-2.4945		5.8646	18.9124	5.8646	-6.1936		5.8646	4.6314	5.8646	-5.1903
	5.8749	15.8732	5.8749	-2.5329		5.8749	18.895	5.8749	-6.1668		5.8749	4.7445	5.8749	-5.1217
	5.8851	15.5004	5.8851	-2.559		5.8851	18.8107	5.8851	-6.1535		5.8851	4.8822	5.8851	-5.068
	5.8954	15.0955	5.8954	-2.601		5.8954	18.7099	5.8954	-6.1213		5.8954	4.9951	5.8954	-5.0418
	5.9056	14.6856	5.9056	-2.6416		5.9056	18.5514	5.9056	-6.1046		5.9056	5.1	5.9056	-5.0087
	5.9158	14.2599	5.9158	-2.6724		5.9158	18.3523	5.9158	-6.0661		5.9158	5.2068	5.9158	-4.967
	5.9261	13.8293	5.9261	-2.7289		5.9261	18.0811	5.9261	-6.031		5.9261	5.3214	5.9261	-4.9383
	5.9363	13.403	5.9363	-2.7578		5.9363	17.7787	5.9363	-6.0093		5.9363	5.4406	5.9363	-4.9057
	5.9466	12.9413	5.9466	-2.7826		5.9466	17.4573	5.9466	-6.0062		5.9466	5.5954	5.9466	-4.8836
	5.9568	12.4866	5.9568	-2.8088		5.9568	17.1025	5.9568	-5.9818		5.9568	5.7516	5.9568	-4.8323
	5.967	12.0401	5.967	-2.8151		5.967	16.6946	5.967	-5.9547		5.967	5.9192	5.967	-4.7915
	5.9773	11.5948	5.9773	-2.8106		5.9773	16.2346	5.9773	-5.9363		5.9773	6.0971	5.9773	-4.7336
	5.9875	11.1364	5.9875	-2.8167		5.9875	15.7974	5.9875	-5.9231		5.9875	6.2911	5.9875	-4.7071
	5.9978	10.684	5.9978	-2.8507		5.9978	15.3207	5.9978	-5.8849		5.9978	6.4874	5.9978	-4.6529
	6.008	10.2303	6.008	-2.8426		6.008	14.8081	6.008	-5.8294		6.008	6.6708	6.008	-4.5916
	6.0182	9.7796	6.0182	-2.8465		6.0182	14.27	6.0182	-5.8377		6.0182	6.8667	6.0182	-4.5332
	6.0285	9.3394	6.0285	-2.8651		6.0285	13.7563	6.0285	-5.8083		6.0285	7.066	6.0285	-4.4758
	6.0387	8.9504	6.0387	-2.8706		6.0387	13.2406	6.0387	-5.7976		6.0387	7.2686	6.0387	-4.4757
	6.049	8.5351	6.049	-2.8979		6.049	12.7177	6.049	-5.7551		6.049	7.44	6.049	-4.4495
	6.0592	8.1358	6.0592	-2.9345		6.0592	12.2071	6.0592	-5.6864		6.0592	7.6103	6.0592	-4.3963
	6.0694	7.7442	6.0694	-2.9526		6.0694	11.6712	6.0694	-5.6327		6.0694	7.7662	6.0694	-4.3569
	6.0797	7.3445	6.0797	-2.965		6.0797	11.1456	6.0797	-5.563		6.0797	7.9266	6.0797	-4.2939
	6.0899	6.9492	6.0899	-3.0029		6.0899	10.6117	6.0899	-5.5701		6.0899	8.0643	6.0899	-4.2314
	6.1002	6.5751	6.1002	-3.0102		6.1002	10.1065	6.1002	-5.5643		6.1002	8.1934	6.1002	-4.1722
	6.1104	6.2207	6.1104	-3.0204		6.1104	9.5906	6.1104	-5.5356		6.1104	8.2908	6.1104	-4.0949
	6.1206	5.8823	6.1206	-3.032		6.1206	9.0784	6.1206	-5.4921		6.1206	8.3605	6.1206	-4.0244
	6.1309	5.5422	6.1309	-2.9735		6.1309	8.6079	6.1309	-5.4519		6.1309	8.4676	6.1309	-3.9369
	6.1411	5.2154	6.1411	-2.9597		6.1411	8.1369	6.1411	-5.4173		6.1411	8.5436	6.1411	-3.8963
	6.1514	4.9041	6.1514	-2.9577		6.1514	7.6895	6.1514	-5.3667		6.1514	8.5864	6.1514	-3.8403
	6.1616	4.5637	6.1616	-2.9887		6.1616	7.2713	6.1616	-5.2758		6.1616	8.622	6.1616	-3.8001
	6.1718	4.2277	6.1718	-2.9976		6.1718	6.8493	6.1718	-5.2233		6.1718	8.6326	6.1718	-3.7927
	6.1821	3.9177	6.1821	-2.9699		6.1821	6.4498	6.1821	-5.1895		6.1821	8.6601	6.1821	-3.7629
	6.1923	3.6523	6.1923	-2.9458		6.1923	6.0623	6.1923	-5.1254		6.1923	8.6893	6.1923	-3.748
	6.2026	3.3805	6.2026	-2.9484		6.2026	5.6673	6.2026	-5.0642		6.2026	8.6966	6.2026	-3.6958
	6.2128	3.1286	6.2128	-2.9557		6.2128	5.2857	6.2128	-5.025		6.2128	8.7102	6.2128	-3.6262
	6.223	2.8904	6.223	-2.9428		6.223	4.9238	6.223	-4.9853		6.223	8.7197	6.223	-3.5796
	6.2333	2.6556	6.2333	-2.9298		6.2333	4.5861	6.2333	-4.9282		6.2333	8.6877	6.2333	-3.5308
	6.2435	2.4197	6.2435	-2.9467		6.2435	4.2606	6.2435	-4.8728		6.2435	8.6455	6.2435	-3.4932
	6.2538	2.1798	6.2538	-2.9239		6.2538	3.96	6.2538	-4.8501		6.2538	8.5945	6.2538	-3.4424
	6.264	1.9643	6.264	-2.8921		6.264	3.6267	6.264	-4.8189		6.264	8.5072	6.264	-3.4139
	6.2742	1.7635	6.2742	-2.8522		6.2742	3.3291	6.2742	-4.7676		6.2742	8.4497	6.2742	-3.3611
	6.2845	1.5375	6.2845	-2.8007		6.2845	3.0733	6.2845	-4.7193		6.2845	8.3438	6.2845	-3.3331
	6.2947	1.3355	6.2947	-2.8086		6.2947	2.8183	6.2947	-4.6774		6.2947	8.2507	6.2947	-3.2734
	6.305	1.1739	6.305	-2.8156		6.305	2.557	6.305	-4.6261		6.305	8.1272	6.305	-3.2043
	6.3152	1.0105	6.3152	-2.7882		6.3152	2.3023	6.3152	-4.584		6.3152	8.0027	6.3152	-3.1322
	6.3254	0.8524	6.3254	-2.7597		6.3254	2.0814	6.3254	-4.5774		6.3254	7.8675	6.3254	-3.087
	6.3357	0.6791	6.3357	-2.7449		6.3357	1.8417	6.3357	-4.556		6.3357	7.7712	6.3357	-3.0453
	6.3459	0.5146	6.3459	-2.7546		6.3459	1.6	6.3459	-4.4855		6.3459	7.6463	6.3459	-3.0174
	6.3562	0.37	6.3562	-2.7454		6.3562	1.3767	6.3562	-4.4125		6.3562	7.517	6.3562	-2.9861
	6.3664	0.2274	6.3664	-2.6723		6.3664	1.1731	6.3664	-4.3715		6.3664	7.4016	6.3664	-2.9624
	6.3766	0.0908	6.3766	-2.6455		6.3766	0.9889	6.3766	-4.3315		6.3766	7.2769	6.3766	-2.9276
	6.3869	-0.0481	6.3869	-2.6355		6.3869	0.7968	6.3869	-4.3043		6.3869	7.1702	6.3869	-2.9012
	6.3971	-0.1693	6.3971	-2.6303		6.3971	0.5942	6.3971	-4.318		6.3971	7.0331	6.3971	-2.8803
	6.4074	-0.2923	6.4074	-2.5976		6.4074	0.4212	6.4074	-4.2996		6.4074	6.9236	6.4074	-2.8334
	6.4176	-0.3711	6.4176	-2.5851		6.4176	0.2526	6.4176	-4.2584		6.4176	6.8075	6.4176	-2.7537
	6.4278	-0.4631	6.4278	-2.5884		6.4278	0.0745	6.4278	-4.1995		6.4278	6.6772	6.4278	-2.6851
	6.4381	-0.5688	6.4381	-2.6036		6.4381	-0.0811	6.4381	-4.1577		6.4381	6.5387	6.4381	-2.6541
	6.4483	-0.6763	6.4483	-2.6029		6.4483	-0.2376	6.4483	-4.1419		6.4483	6.3991	6.4483	-2.6497
	6.4586	-0.7513	6.4586	-2.5684		6.4586	-0.3839	6.4586	-4.1124		6.4586	6.2511	6.4586	-2.6178
	6.4688	-0.8389	6.4688	-2.5007		6.4688	-0.5193	6.4688	-4.0758		6.4688	6.1121	6.4688	-2.5748
	6.479	-0.9229	6.479	-2.451		6.479	-0.6591	6.479	-3.9964		6.479	5.9706	6.479	-2.5533
	6.4893	-1.0091	6.4893	-2.414		6.4893	-0.7735	6.4893	-3.959		6.4893	5.8155	6.4893	-2.5241
	6.4995	-1.0887	6.4995	-2.3591		6.4995	-0.9044	6.4995	-3.9048		6.4995	5.6434	6.4995	-2.4895
	6.5098	-1.1738	6.5098	-2.3029		6.5098	-1.0291	6.5098	-3.8682		6.5098	5.4825	6.5098	-2.4592
	6.52	-1.2466	6.52	-2.2744		6.52	-1.1499	6.52	-3.859		6.52	5.3305	6.52	-2.452
	6.5302	-1.3321	6.5302	-2.2566		6.5302	-1.2723	6.5302	-3.8411		6.5302	5.1649	6.5302	-2.4135
	6.5405	-1.3961	6.5405	-2.2358		6.5405	-1.3663	6.5405	-3.8429		6.5405	5.0012	6.5405	-2.3608
	6.5507	-1.4601	6.5507	-2.2332		6.5507	-1.4714	6.5507	-3.8391		6.5507	4.8358	6.5507	-2.303
	6.561	-1.5209	6.561	-2.2006		6.561	-1.574	6.561	-3.8187		6.561	4.6521	6.561	-2.2743
	6.5712	-1.5781	6.5712	-2.1919		6.5712	-1.6642	6.5712	-3.7748		6.5712	4.493	6.5712	-2.2629
	6.5814	-1.6276	6.5814	-2.1572		6.5814	-1.746	6.5814	-3.7203		6.5814	4.2973	6.5814	-2.2312
	6.5917	-1.6888	6.5917	-2.1285		6.5917	-1.8381	6.5917	-3.6442		6.5917	4.1024	6.5917	-2.1924
	6.6019	-1.7092	6.6019	-2.1078		6.6019	-1.9203	6.6019	-3.6066		6.6019	3.9367	6.6019	-2.1752
	6.6122	-1.7447	6.6122	-2.0908		6.6122	-1.9838	6.6122	-3.609		6.6122	3.7744	6.6122	-2.1687
	6.6224	-1.7742	6.6224	-2.0854		6.6224	-2.0439	6.6224	-3.5861		6.6224	3.603	6.6224	-2.1621
	6.6326	-1.7858	6.6326	-2.0668		6.6326	-2.1262	6.6326	-3.5761		6.6326	3.4143	6.6326	-2.1566
	6.6429	-1.8358	6.6429	-2.056		6.6429	-2.19	6.6429	-3.5483		6.6429	3.2396	6.6429	-2.1162
	6.6531	-1.8828	6.6531	-1.9893		6.6531	-2.2232	6.6531	-3.5191		6.6531	3.0789	6.6531	-2.1167
	6.6634	-1.908	6.6634	-1.9112		6.6634	-2.2872	6.6634	-3.4676		6.6634	2.9116	6.6634	-2.097
	6.6736	-1.9158	6.6736	-1.8574		6.6736	-2.3637	6.6736	-3.3971		6.6736	2.7594	6.6736	-2.0733
	6.6838	-1.9354	6.6838	-1.837		6.6838	-2.4427	6.6838	-3.3469		6.6838	2.5721	6.6838	-2.043
	6.6941	-1.9445	6.6941	-1.846		6.6941	-2.4669	6.6941	-3.3088		6.6941	2.3968	6.6941	-2.0295
	6.7043	-1.9954	6.7043	-1.843		6.7043	-2.476	6.7043	-3.269		6.7043	2.2356	6.7043	-1.9982
	6.7146	-2.0278	6.7146	-1.8708		6.7146	-2.5059	6.7146	-3.2398		6.7146	2.048	6.7146	-1.9504
	6.7248	-2.0603	6.7248	-1.8327		6.7248	-2.5735	6.7248	-3.2268		6.7248	1.9017	6.7248	-1.9558
	6.735	-2.0771	6.735	-1.8138		6.735	-2.6263	6.735	-3.1998		6.735	1.7639	6.735	-1.9616
	6.7453	-2.0852	6.7453	-1.8043		6.7453	-2.657	6.7453	-3.185		6.7453	1.6091	6.7453	-1.9477
	6.7555	-2.0999	6.7555	-1.7931		6.7555	-2.6984	6.7555	-3.1237		6.7555	1.4541	6.7555	-1.8986
	6.7658	-2.1114	6.7658	-1.7757		6.7658	-2.7271	6.7658	-3.0956		6.7658	1.3132	6.7658	-1.857
	6.776	-2.122	6.776	-1.7437		6.776	-2.78	6.776	-3.0668		6.776	1.1737	6.776	-1.8458
	6.7862	-2.1301	6.7862	-1.6905		6.7862	-2.8392	6.7862	-3.0437		6.7862	1.0304	6.7862	-1.8133
	6.7965	-2.1489	6.7965	-1.635		6.7965	-2.8654	6.7965	-3.0482		6.7965	0.8759	6.7965	-1.7836
	6.8067	-2.1591	6.8067	-1.606		6.8067	-2.8953	6.8067	-3.0104		6.8067	0.7225	6.8067	-1.7349
	6.817	-2.1536	6.817	-1.6062		6.817	-2.9358	6.817	-2.9482		6.817	0.6005	6.817	-1.6831
	6.8272	-2.1347	6.8272	-1.6167		6.8272	-2.9769	6.8272	-2.9261		6.8272	0.4985	6.8272	-1.6552
	6.8374	-2.163	6.8374	-1.6		6.8374	-3.0187	6.8374	-2.9328		6.8374	0.4145	6.8374	-1.6142
	6.8477	-2.1831	6.8477	-1.566		6.8477	-3.0252	6.8477	-2.91		6.8477	0.3051	6.8477	-1.5549
	6.8579	-2.1889	6.8579	-1.5302		6.8579	-3.0254	6.8579	-2.8688		6.8579	0.1829	6.8579	-1.5077
	6.8682	-2.1954	6.8682	-1.4958		6.8682	-3.0594	6.8682	-2.8098		6.8682	0.0442	6.8682	-1.4414
	6.8784	-2.1964	6.8784	-1.4972		6.8784	-3.0555	6.8784	-2.7584		6.8784	-0.0682	6.8784	-1.4294
	6.8886	-2.2185	6.8886	-1.5044		6.8886	-3.0352	6.8886	-2.6983		6.8886	-0.1568	6.8886	-1.4209
	6.8989	-2.2453	6.8989	-1.538		6.8989	-3.0303	6.8989	-2.6685		6.8989	-0.2673	6.8989	-1.4163
	6.9091	-2.2595	6.9091	-1.5209		6.9091	-3.0701	6.9091	-2.6537		6.9091	-0.3656	6.9091	-1.4004
	6.9194	-2.252	6.9194	-1.4948		6.9194	-3.0701	6.9194	-2.6353		6.9194	-0.447	6.9194	-1.3233
	6.9296	-2.2365	6.9296	-1.4528		6.9296	-3.0672	6.9296	-2.5889		6.9296	-0.5361	6.9296	-1.3049
	6.9398	-2.2449	6.9398	-1.412		6.9398	-3.0727	6.9398	-2.5739		6.9398	-0.6185	6.9398	-1.3127
	6.9501	-2.2378	6.9501	-1.3738		6.9501	-3.0883	6.9501	-2.563		6.9501	-0.7131	6.9501	-1.3184
	6.9603	-2.2183	6.9603	-1.3454		6.9603	-3.0687	6.9603	-2.5422		6.9603	-0.7683	6.9603	-1.2864
	6.9706	-2.2281	6.9706	-1.3184		6.9706	-3.0731	6.9706	-2.545		6.9706	-0.8507	6.9706	-1.2743
	6.9808	-2.2424	6.9808	-1.2808		6.9808	-3.0618	6.9808	-2.5129		6.9808	-0.9369	6.9808	-1.2422
	6.991	-2.2497	6.991	-1.2695		6.991	-3.0276	6.991	-2.4564		6.991	-0.9895	6.991	-1.1832
	7.0013	-2.231	7.0013	-1.2481		7.0013	-3.0084	7.0013	-2.3654		7.0013	-1.0456	7.0013	-1.1574
	7.0115	-2.2134	7.0115	-1.2332		7.0115	-2.9951	7.0115	-2.3248		7.0115	-1.0924	7.0115	-1.1476
	7.0218	-2.2018	7.0218	-1.25		7.0218	-2.9981	7.0218	-2.2852		7.0218	-1.1576	7.0218	-1.1519
	7.032	-2.2104	7.032	-1.2561		7.032	-2.9769	7.032	-2.2416		7.032	-1.2047	7.032	-1.1523
	7.0422	-2.2055	7.0422	-1.2219		7.0422	-2.9471	7.0422	-2.2291		7.0422	-1.2641	7.0422	-1.1161
	7.0525	-2.1863	7.0525	-1.234		7.0525	-2.9378	7.0525	-2.2067		7.0525	-1.3005	7.0525	-1.0899
	7.0627	-2.1539	7.0627	-1.1924		7.0627	-2.9198	7.0627	-2.183		7.0627	-1.3436	7.0627	-1.0329
	7.073	-2.131	7.073	-1.1481		7.073	-2.9099	7.073	-2.1508		7.073	-1.4103	7.073	-0.9871
	7.0832	-2.1329	7.0832	-1.0869		7.0832	-2.9244	7.0832	-2.102		7.0832	-1.4579	7.0832	-0.9763
	7.0934	-2.1167	7.0934	-1.0582		7.0934	-2.9074	7.0934	-2.0782		7.0934	-1.4732	7.0934	-0.9437
	7.1037	-2.1078	7.1037	-1.0193		7.1037	-2.8938	7.1037	-2.0719		7.1037	-1.5249	7.1037	-0.9203
	7.1139	-2.0987	7.1139	-1.0122		7.1139	-2.8919	7.1139	-2.0561		7.1139	-1.5795	7.1139	-0.9255
	7.1242	-2.0805	7.1242	-1.0235		7.1242	-2.8897	7.1242	-2.0289		7.1242	-1.6211	7.1242	-0.9337
	7.1344	-2.0917	7.1344	-1.0095		7.1344	-2.8879	7.1344	-1.9845		7.1344	-1.6442	7.1344	-0.8635
	7.1446	-2.0903	7.1446	-0.974		7.1446	-2.8867	7.1446	-1.9525		7.1446	-1.675	7.1446	-0.8454
	7.1549	-2.0864	7.1549	-0.975		7.1549	-2.8725	7.1549	-1.9002		7.1549	-1.7069	7.1549	-0.8795
	7.1651	-2.0938	7.1651	-0.9507		7.1651	-2.8356	7.1651	-1.8581		7.1651	-1.7308	7.1651	-0.8735
	7.1754	-2.0973	7.1754	-0.9303		7.1754	-2.797	7.1754	-1.8258		7.1754	-1.7466	7.1754	-0.8723
	7.1856	-2.0704	7.1856	-0.9354		7.1856	-2.7657	7.1856	-1.7859		7.1856	-1.7847	7.1856	-0.8565
	7.1958	-2.0681	7.1958	-0.8808		7.1958	-2.7408	7.1958	-1.761		7.1958	-1.7945	7.1958	-0.8317
	7.2061	-2.053	7.2061	-0.8395		7.2061	-2.7288	7.2061	-1.7288		7.2061	-1.8113	7.2061	-0.8268
	7.2163	-2.0509	7.2163	-0.848		7.2163	-2.7222	7.2163	-1.7029		7.2163	-1.8528	7.2163	-0.8141
	7.2266	-2.0834	7.2266	-0.8256		7.2266	-2.7174	7.2266	-1.6911		7.2266	-1.8776	7.2266	-0.7695
	7.2368	-2.0656	7.2368	-0.7854		7.2368	-2.7013	7.2368	-1.6292		7.2368	-1.9129	7.2368	-0.7605
	7.247	-2.0444	7.247	-0.7811		7.247	-2.6878	7.247	-1.5683		7.247	-1.9344	7.247	-0.7748
	7.2573	-2.0538	7.2573	-0.7734		7.2573	-2.6988	7.2573	-1.5201		7.2573	-1.9701	7.2573	-0.7652
	7.2675	-2.0389	7.2675	-0.7685		7.2675	-2.6887	7.2675	-1.4597		7.2675	-1.9815	7.2675	-0.7605
	7.2778	-2.0326	7.2778	-0.758		7.2778	-2.6553	7.2778	-1.4437		7.2778	-1.975	7.2778	-0.75
	7.288	-2.0166	7.288	-0.7376		7.288	-2.6576	7.288	-1.4298		7.288	-1.9581	7.288	-0.7023
	7.2982	-1.9947	7.2982	-0.7256		7.2982	-2.6231	7.2982	-1.4439		7.2982	-1.9836	7.2982	-0.699
	7.3085	-1.9773	7.3085	-0.7429		7.3085	-2.5986	7.3085	-1.4305		7.3085	-2.0087	7.3085	-0.7014
	7.3187	-1.9747	7.3187	-0.7471		7.3187	-2.5982	7.3187	-1.3919		7.3187	-2.0387	7.3187	-0.6576
	7.329	-1.9818	7.329	-0.7129		7.329	-2.6006	7.329	-1.3619		7.329	-2.0582	7.329	-0.647
	7.3392	-1.965	7.3392	-0.6723		7.3392	-2.5741	7.3392	-1.3441		7.3392	-2.0727	7.3392	-0.6093
	7.3494	-1.9216	7.3494	-0.6476		7.3494	-2.5471	7.3494	-1.2814		7.3494	-2.0667	7.3494	-0.5667
	7.3597	-1.8777	7.3597	-0.6249		7.3597	-2.5331	7.3597	-1.2362		7.3597	-2.0759	7.3597	-0.5206
	7.3699	-1.8457	7.3699	-0.5577		7.3699	-2.5054	7.3699	-1.2106		7.3699	-2.0836	7.3699	-0.4827
	7.3802	-1.8321	7.3802	-0.5493		7.3802	-2.4608	7.3802	-1.1873		7.3802	-2.0864	7.3802	-0.4385
	7.3904	-1.8224	7.3904	-0.5485		7.3904	-2.4192	7.3904	-1.1261		7.3904	-2.109	7.3904	-0.4271
	7.4006	-1.8286	7.4006	-0.5288		7.4006	-2.4351	7.4006	-1.0631		7.4006	-2.0672	7.4006	-0.4071
	7.4109	-1.8219	7.4109	-0.4987		7.4109	-2.4389	7.4109	-1.0303		7.4109	-2.0722	7.4109	-0.3668
	7.4211	-1.7947	7.4211	-0.5038		7.4211	-2.4114	7.4211	-1.0344		7.4211	-2.06	7.4211	-0.3236
	7.4314	-1.7672	7.4314	-0.5203		7.4314	-2.3977	7.4314	-1.0176		7.4314	-2.0725	7.4314	-0.3228
	7.4416	-1.7315	7.4416	-0.5016		7.4416	-2.3925	7.4416	-0.9784		7.4416	-2.1111	7.4416	-0.2895
	7.4518	-1.7335	7.4518	-0.4777		7.4518	-2.3741	7.4518	-0.9233		7.4518	-2.1076	7.4518	-0.2384
	7.4621	-1.7041	7.4621	-0.4395		7.4621	-2.3324	7.4621	-0.9104		7.4621	-2.1236	7.4621	-0.2235
	7.4723	-1.667	7.4723	-0.4528		7.4723	-2.3146	7.4723	-0.8726		7.4723	-2.1171	7.4723	-0.1716
	7.4826	-1.6464	7.4826	-0.4798		7.4826	-2.3044	7.4826	-0.8525		7.4826	-2.1168	7.4826	-0.1354
	7.4928	-1.6313	7.4928	-0.4283		7.4928	-2.2962	7.4928	-0.8389		7.4928	-2.1071	7.4928	-0.094
	7.503	-1.5997	7.503	-0.3714		7.503	-2.2765	7.503	-0.805		7.503	-2.1098	7.503	-0.0581
	7.5133	-1.6127	7.5133	-0.3367		7.5133	-2.2578	7.5133	-0.7813		7.5133	-2.134	7.5133	0.0066
	7.5235	-1.6013	7.5235	-0.2948		7.5235	-2.225	7.5235	-0.7499		7.5235	-2.1534	7.5235	0.0597
	7.5338	-1.5754	7.5338	-0.2668		7.5338	-2.2009	7.5338	-0.7427		7.5338	-2.156	7.5338	0.0975
	7.544	-1.5556	7.544	-0.2599		7.544	-2.1756	7.544	-0.6942		7.544	-2.1296	7.544	0.1499
	7.5542	-1.5318	7.5542	-0.2463		7.5542	-2.1676	7.5542	-0.6415		7.5542	-2.146	7.5542	0.202
	7.5645	-1.4964	7.5645	-0.2316		7.5645	-2.1454	7.5645	-0.5618		7.5645	-2.1707	7.5645	0.231
	7.5747	-1.4612	7.5747	-0.185		7.5747	-2.1246	7.5747	-0.5051		7.5747	-2.1663	7.5747	0.2644
	7.585	-1.4059	7.585	-0.1915		7.585	-2.141	7.585	-0.4711		7.585	-2.1669	7.585	0.2783
	7.5952	-1.3786	7.5952	-0.2158		7.5952	-2.149	7.5952	-0.4295		7.5952	-2.1664	7.5952	0.3095
	7.6054	-1.3113	7.6054	-0.2136		7.6054	-2.1132	7.6054	-0.4274		7.6054	-2.1716	7.6054	0.3253
	7.6157	-1.2138	7.6157	-0.226		7.6157	-2.0902	7.6157	-0.4026		7.6157	-2.1468	7.6157	0.3493
	7.6259	-1.1362	7.6259	-0.1988		7.6259	-2.0828	7.6259	-0.3887		7.6259	-2.1645	7.6259	0.3733
	7.6362	-1.0778	7.6362	-0.198		7.6362	-2.1006	7.6362	-0.3448		7.6362	-2.1605	7.6362	0.4112
	7.6464	-1.0243	7.6464	-0.1863		7.6464	-2.0955	7.6464	-0.3172		7.6464	-2.1706	7.6464	0.4434
	7.6566	-0.9721	7.6566	-0.1998		7.6566	-2.0893	7.6566	-0.2865		7.6566	-2.1773	7.6566	0.4582
	7.6669	-0.8978	7.6669	-0.194		7.6669	-2.0743	7.6669	-0.2627		7.6669	-2.1745	7.6669	0.5276
	7.6771	-0.8176	7.6771	-0.2242		7.6771	-2.0347	7.6771	-0.2649		7.6771	-2.163	7.6771	0.5525
	7.6874	-0.7473	7.6874	-0.233		7.6874	-2.0113	7.6874	-0.2432		7.6874	-2.1746	7.6874	0.5903
	7.6976	-0.6934	7.6976	-0.2103		7.6976	-2.0039	7.6976	-0.2091		7.6976	-2.2006	7.6976	0.5993
	7.7078	-0.6183	7.7078	-0.2024		7.7078	-2.0306	7.7078	-0.1506		7.7078	-2.1807	7.7078	0.6303
	7.7181	-0.5364	7.7181	-0.1764		7.7181	-2.0166	7.7181	-0.1042		7.7181	-2.1651	7.7181	0.6727
	7.7283	-0.4272	7.7283	-0.2003		7.7283	-1.9812	7.7283	-0.1076		7.7283	-2.169	7.7283	0.6851
	7.7386	-0.3447	7.7386	-0.2061		7.7386	-1.9654	7.7386	-0.0688		7.7386	-2.168	7.7386	0.7156
	7.7488	-0.2773	7.7488	-0.2008		7.7488	-1.9535	7.7488	-0.022		7.7488	-2.182	7.7488	0.7451
	7.759	-0.199	7.759	-0.1728		7.759	-1.936	7.759	0.0085		7.759	-2.174	7.759	0.7795
	7.7693	-0.1051	7.7693	-0.141		7.7693	-1.9104	7.7693	0.0374		7.7693	-2.1774	7.7693	0.8036
	7.7795	-0.0245	7.7795	-0.1049		7.7795	-1.9053	7.7795	0.061		7.7795	-2.19	7.7795	0.8198
	7.7898	0.0389	7.7898	-0.1006		7.7898	-1.8744	7.7898	0.072		7.7898	-2.176	7.7898	0.8304
	7.8	0.098	7.8	-0.108		7.8	-1.8503	7.8	0.0979		7.8	-2.1551	7.8	0.8773
	7.8102	0.1748	7.8102	-0.1199		7.8102	-1.8352	7.8102	0.1557		7.8102	-2.1288	7.8102	0.9165
	7.8205	0.2365	7.8205	-0.0963		7.8205	-1.8504	7.8205	0.1927		7.8205	-2.1432	7.8205	0.9347
	7.8307	0.2917	7.8307	-0.0639		7.8307	-1.8519	7.8307	0.1768		7.8307	-2.1529	7.8307	0.9415
	7.841	0.3605	7.841	-0.0368		7.841	-1.8302	7.841	0.1879		7.841	-2.1549	7.841	0.9565
	7.8512	0.4402	7.8512	-0.0109		7.8512	-1.7892	7.8512	0.2225		7.8512	-2.1347	7.8512	0.9968
	7.8614	0.5125	7.8614	0.0061		7.8614	-1.7547	7.8614	0.2354		7.8614	-2.1488	7.8614	1.0116
	7.8717	0.5988	7.8717	0.0307		7.8717	-1.7221	7.8717	0.2581		7.8717	-2.147	7.8717	1.0118
	7.8819	0.672	7.8819	0.0604		7.8819	-1.6787	7.8819	0.2593		7.8819	-2.1543	7.8819	1.0338
	7.8922	0.7182	7.8922	0.0901		7.8922	-1.6787	7.8922	0.2744		7.8922	-2.1385	7.8922	1.0583
	7.9024	0.7648	7.9024	0.0968		7.9024	-1.6696	7.9024	0.295		7.9024	-2.1135	7.9024	1.0559
	7.9126	0.8168	7.9126	0.0962		7.9126	-1.6771	7.9126	0.3118		7.9126	-2.0915	7.9126	1.0441
	7.9229	0.8758	7.9229	0.1418		7.9229	-1.6923	7.9229	0.3325		7.9229	-2.0893	7.9229	1.0755
	7.9331	0.912	7.9331	0.186		7.9331	-1.695	7.9331	0.3458		7.9331	-2.0635	7.9331	1.1017
	7.9434	0.9412	7.9434	0.1823		7.9434	-1.6696	7.9434	0.3674		7.9434	-2.033	7.9434	1.1466
	7.9536	0.962	7.9536	0.1757		7.9536	-1.6071	7.9536	0.4152		7.9536	-2.0245	7.9536	1.1655
	7.9638	1.0272	7.9638	0.204		7.9638	-1.59	7.9638	0.4308		7.9638	-1.9889	7.9638	1.1644
	7.9741	1.0854	7.9741	0.253		7.9741	-1.5428	7.9741	0.4394		7.9741	-1.9626	7.9741	1.1834
	7.9843	1.1304	7.9843	0.2587		7.9843	-1.5079	7.9843	0.4633		7.9843	-1.9426	7.9843	1.1823
	7.9946	1.1749	7.9946	0.2824		7.9946	-1.4949	7.9946	0.4898		7.9946	-1.9022	7.9946	1.1897
	8.0048	1.2032	8.0048	0.3183		8.0048	-1.4573	8.0048	0.5048		8.0048	-1.8748	8.0048	1.2107
	8.015	1.2802	8.015	0.3252		8.015	-1.4248	8.015	0.4946		8.015	-1.846	8.015	1.2504
	8.0253	1.3355	8.0253	0.3254		8.0253	-1.3761	8.0253	0.5116		8.0253	-1.8261	8.0253	1.2706
	8.0355	1.379	8.0355	0.3652		8.0355	-1.3721	8.0355	0.5483		8.0355	-1.8075	8.0355	1.2752
	8.0458	1.4157	8.0458	0.3857		8.0458	-1.3684	8.0458	0.5523		8.0458	-1.7938	8.0458	1.2914
	8.056	1.4669	8.056	0.3821		8.056	-1.326	8.056	0.5604		8.056	-1.7829	8.056	1.3044
	8.0662	1.5035	8.0662	0.3787		8.0662	-1.332	8.0662	0.5365		8.0662	-1.7874	8.0662	1.3245
	8.0765	1.5464	8.0765	0.3818		8.0765	-1.2981	8.0765	0.5255		8.0765	-1.7817	8.0765	1.2989
	8.0867	1.5871	8.0867	0.3828		8.0867	-1.2391	8.0867	0.5102		8.0867	-1.7447	8.0867	1.3233
	8.097	1.6367	8.097	0.4315		8.097	-1.2196	8.097	0.51		8.097	-1.723	8.097	1.3495
	8.1072	1.672	8.1072	0.4703		8.1072	-1.2129	8.1072	0.5209		8.1072	-1.6859	8.1072	1.317
	8.1174	1.7091	8.1174	0.4552		8.1174	-1.1865	8.1174	0.5341		8.1174	-1.6449	8.1174	1.2602
	8.1277	1.7092	8.1277	0.446		8.1277	-1.1623	8.1277	0.5571		8.1277	-1.6275	8.1277	1.2455
	8.1379	1.7576	8.1379	0.4651		8.1379	-1.1215	8.1379	0.5608		8.1379	-1.6272	8.1379	1.2513
	8.1482	1.8199	8.1482	0.4847		8.1482	-1.0717	8.1482	0.5649		8.1482	-1.5986	8.1482	1.261
	8.1584	1.8391	8.1584	0.5033		8.1584	-1.0527	8.1584	0.5737		8.1584	-1.5781	8.1584	1.2708
	8.1686	1.8557	8.1686	0.5658		8.1686	-1.01	8.1686	0.567		8.1686	-1.5572	8.1686	1.3094
	8.1789	1.8721	8.1789	0.5947		8.1789	-0.9838	8.1789	0.5569		8.1789	-1.5246	8.1789	1.3428
	8.1891	1.9048	8.1891	0.5956		8.1891	-0.9988	8.1891	0.5622		8.1891	-1.5145	8.1891	1.3306
	8.1994	1.9326	8.1994	0.6139		8.1994	-0.9796	8.1994	0.5465		8.1994	-1.4737	8.1994	1.3298
	8.2096	1.9891	8.2096	0.642		8.2096	-0.9611	8.2096	0.5439		8.2096	-1.4686	8.2096	1.3158
	8.2198	2.024	8.2198	0.6985		8.2198	-0.9529	8.2198	0.5692		8.2198	-1.4373	8.2198	1.2844
	8.2301	2.0728	8.2301	0.7413		8.2301	-0.9395	8.2301	0.6016		8.2301	-1.4177	8.2301	1.233
	8.2403	2.1058	8.2403	0.7929		8.2403	-0.9294	8.2403	0.5778		8.2403	-1.4044	8.2403	1.2068
	8.2506	2.132	8.2506	0.8063		8.2506	-0.9197	8.2506	0.5506		8.2506	-1.3899	8.2506	1.1585
	8.2608	2.1608	8.2608	0.8292		8.2608	-0.9188	8.2608	0.5744		8.2608	-1.4031	8.2608	1.1193
	8.271	2.191	8.271	0.8203		8.271	-0.8808	8.271	0.6035		8.271	-1.4056	8.271	1.126
	8.2813	2.2282	8.2813	0.8432		8.2813	-0.8442	8.2813	0.5975		8.2813	-1.3601	8.2813	1.1284
	8.2915	2.2442	8.2915	0.9112		8.2915	-0.8258	8.2915	0.5892		8.2915	-1.328	8.2915	1.113
	8.3018	2.256	8.3018	0.9356		8.3018	-0.8202	8.3018	0.6158		8.3018	-1.3001	8.3018	1.1232
	8.312	2.2767	8.312	0.9394		8.312	-0.8265	8.312	0.6154		8.312	-1.2871	8.312	1.1137
	8.3222	2.2827	8.3222	0.9274		8.3222	-0.8164	8.3222	0.6062		8.3222	-1.3015	8.3222	1.1015
	8.3325	2.2879	8.3325	0.918		8.3325	-0.7852	8.3325	0.604		8.3325	-1.3151	8.3325	1.0852
	8.3427	2.3013	8.3427	0.9192		8.3427	-0.7723	8.3427	0.6179		8.3427	-1.3165	8.3427	1.068
	8.353	2.2994	8.353	0.9805		8.353	-0.787	8.353	0.6171		8.353	-1.3118	8.353	1.0556
	8.3632	2.3069	8.3632	1.003		8.3632	-0.7875	8.3632	0.629		8.3632	-1.2833	8.3632	1.0358
	8.3734	2.3042	8.3734	1.0194		8.3734	-0.7537	8.3734	0.6282		8.3734	-1.2511	8.3734	1.0199
	8.3837	2.308	8.3837	0.9898		8.3837	-0.7381	8.3837	0.625		8.3837	-1.2613	8.3837	0.9986
	8.3939	2.3177	8.3939	0.9677		8.3939	-0.7028	8.3939	0.6327		8.3939	-1.2729	8.3939	0.9473
	8.4042	2.3199	8.4042	0.9385		8.4042	-0.7011	8.4042	0.6575		8.4042	-1.2485	8.4042	0.8985
	8.4144	2.321	8.4144	0.9589		8.4144	-0.7238	8.4144	0.6713		8.4144	-1.2317	8.4144	0.8695
	8.4246	2.3304	8.4246	0.9673		8.4246	-0.7094	8.4246	0.7017		8.4246	-1.2381	8.4246	0.8485
	8.4349	2.3383	8.4349	0.9693		8.4349	-0.6889	8.4349	0.7084		8.4349	-1.2135	8.4349	0.8426
	8.4451	2.3263	8.4451	1.006		8.4451	-0.6833	8.4451	0.7196		8.4451	-1.1778	8.4451	0.8237
	8.4554	2.3391	8.4554	1.0646		8.4554	-0.6601	8.4554	0.7172		8.4554	-1.1835	8.4554	0.8176
	8.4656	2.3272	8.4656	1.1083		8.4656	-0.6502	8.4656	0.7187		8.4656	-1.1583	8.4656	0.7488
	8.4758	2.316	8.4758	1.1308		8.4758	-0.6148	8.4758	0.7509		8.4758	-1.1619	8.4758	0.7294
	8.4861	2.2929	8.4861	1.1229		8.4861	-0.5919	8.4861	0.7463		8.4861	-1.1337	8.4861	0.7278
	8.4963	2.2694	8.4963	1.1174		8.4963	-0.5785	8.4963	0.745		8.4963	-1.1197	8.4963	0.7221
	8.5066	2.2213	8.5066	1.138		8.5066	-0.5537	8.5066	0.746		8.5066	-1.1237	8.5066	0.6905
	8.5168	2.2121	8.5168	1.1403		8.5168	-0.5533	8.5168	0.7534		8.5168	-1.1146	8.5168	0.6727
	8.527	2.1769	8.527	1.1347		8.527	-0.5544	8.527	0.7514		8.527	-1.1211	8.527	0.6495
	8.5373	2.1516	8.5373	1.1217		8.5373	-0.5607	8.5373	0.7662		8.5373	-1.102	8.5373	0.6224
	8.5475	2.1387	8.5475	1.1088		8.5475	-0.5621	8.5475	0.7742		8.5475	-1.096	8.5475	0.6198
	8.5578	2.146	8.5578	1.114		8.5578	-0.5367	8.5578	0.782		8.5578	-1.0801	8.5578	0.6059
	8.568	2.1295	8.568	1.0936		8.568	-0.504	8.568	0.7522		8.568	-1.105	8.568	0.5945
	8.5782	2.0782	8.5782	1.1044		8.5782	-0.4847	8.5782	0.7656		8.5782	-1.1176	8.5782	0.5823
	8.5885	2.0455	8.5885	1.1		8.5885	-0.4674	8.5885	0.8317		8.5885	-1.1112	8.5885	0.5959
	8.5987	2.0276	8.5987	1.1082		8.5987	-0.4562	8.5987	0.87		8.5987	-1.1038	8.5987	0.5984
	8.609	1.9873	8.609	1.1202		8.609	-0.4679	8.609	0.8507		8.609	-1.0994	8.609	0.5967
	8.6192	1.9553	8.6192	1.1199		8.6192	-0.4845	8.6192	0.792		8.6192	-1.1091	8.6192	0.5934
	8.6294	1.9293	8.6294	1.1085		8.6294	-0.4615	8.6294	0.7493		8.6294	-1.129	8.6294	0.5812
	8.6397	1.8833	8.6397	1.0864		8.6397	-0.4242	8.6397	0.7412		8.6397	-1.1117	8.6397	0.592
	8.6499	1.8533	8.6499	1.0655		8.6499	-0.4219	8.6499	0.7785		8.6499	-1.1088	8.6499	0.5636
	8.6602	1.791	8.6602	1.0353		8.6602	-0.423	8.6602	0.7893		8.6602	-1.0863	8.6602	0.5113
	8.6704	1.753	8.6704	1.038		8.6704	-0.404	8.6704	0.8062		8.6704	-1.0845	8.6704	0.4997
	8.6806	1.713	8.6806	1.0509		8.6806	-0.3861	8.6806	0.8022		8.6806	-1.0677	8.6806	0.5097
	8.6909	1.7032	8.6909	1.0829		8.6909	-0.3891	8.6909	0.8153		8.6909	-1.0176	8.6909	0.4751
	8.7011	1.6556	8.7011	1.1105		8.7011	-0.376	8.7011	0.8194		8.7011	-0.9934	8.7011	0.4606
	8.7114	1.6146	8.7114	1.1382		8.7114	-0.3724	8.7114	0.8055		8.7114	-0.9776	8.7114	0.4731
	8.7216	1.5683	8.7216	1.1476		8.7216	-0.3725	8.7216	0.7817		8.7216	-0.9852	8.7216	0.4604
	8.7318	1.5277	8.7318	1.1182		8.7318	-0.3735	8.7318	0.756		8.7318	-0.9927	8.7318	0.4406
	8.7421	1.4708	8.7421	1.0827		8.7421	-0.3477	8.7421	0.7433		8.7421	-0.9706	8.7421	0.3987
	8.7523	1.4193	8.7523	1.0397		8.7523	-0.3226	8.7523	0.7216		8.7523	-0.9595	8.7523	0.4307
	8.7626	1.3712	8.7626	1.0618		8.7626	-0.3128	8.7626	0.6991		8.7626	-0.9546	8.7626	0.4301
	8.7728	1.3154	8.7728	1.0869		8.7728	-0.3183	8.7728	0.6555		8.7728	-0.9582	8.7728	0.4209
	8.783	1.2695	8.783	1.117		8.783	-0.3013	8.783	0.6498		8.783	-0.9591	8.783	0.4061
	8.7933	1.2549	8.7933	1.1327		8.7933	-0.2914	8.7933	0.6798		8.7933	-0.9377	8.7933	0.3689
	8.8035	1.2146	8.8035	1.1044		8.8035	-0.2774	8.8035	0.6765		8.8035	-0.912	8.8035	0.3297
	8.8138	1.1825	8.8138	1.0585		8.8138	-0.2722	8.8138	0.6777		8.8138	-0.8829	8.8138	0.3306
	8.824	1.1164	8.824	1.0757		8.824	-0.2662	8.824	0.6666		8.824	-0.8848	8.824	0.3208
	8.8342	1.0565	8.8342	1.0932		8.8342	-0.2496	8.8342	0.6365		8.8342	-0.8875	8.8342	0.3187
	8.8445	1.0183	8.8445	1.0713		8.8445	-0.2354	8.8445	0.6144		8.8445	-0.8805	8.8445	0.3155
	8.8547	0.9827	8.8547	0.9955		8.8547	-0.2255	8.8547	0.6404		8.8547	-0.8693	8.8547	0.316
	8.865	0.9575	8.865	0.9417		8.865	-0.2154	8.865	0.6566		8.865	-0.832	8.865	0.313
	8.8752	0.9233	8.8752	0.9385		8.8752	-0.2042	8.8752	0.6418		8.8752	-0.7827	8.8752	0.3006
	8.8854	0.8551	8.8854	0.9261		8.8854	-0.2198	8.8854	0.6079		8.8854	-0.7535	8.8854	0.2773
	8.8957	0.8191	8.8957	0.9265		8.8957	-0.2136	8.8957	0.6068		8.8957	-0.729	8.8957	0.2719
	8.9059	0.7794	8.9059	0.9122		8.9059	-0.1912	8.9059	0.5824		8.9059	-0.6998	8.9059	0.2687
	8.9162	0.7459	8.9162	0.9022		8.9162	-0.1883	8.9162	0.5434		8.9162	-0.6873	8.9162	0.2523
	8.9264	0.7014	8.9264	0.9052		8.9264	-0.1773	8.9264	0.5208		8.9264	-0.6493	8.9264	0.2484
	8.9366	0.6794	8.9366	0.916		8.9366	-0.1735	8.9366	0.5382		8.9366	-0.6178	8.9366	0.2326
	8.9469	0.626	8.9469	0.9087		8.9469	-0.187	8.9469	0.5317		8.9469	-0.5644	8.9469	0.2238
	8.9571	0.5627	8.9571	0.8691		8.9571	-0.1811	8.9571	0.523		8.9571	-0.519	8.9571	0.2438
	8.9674	0.5362	8.9674	0.8464		8.9674	-0.1743	8.9674	0.5708		8.9674	-0.5067	8.9674	0.256
	8.9776	0.4779	8.9776	0.8323		8.9776	-0.1761	8.9776	0.5546		8.9776	-0.4999	8.9776	0.2594
	8.9878	0.4411	8.9878	0.8185		8.9878	-0.1752	8.9878	0.5056		8.9878	-0.4831	8.9878	0.2613
	8.9981	0.4133	8.9981	0.7951		8.9981	-0.1919	8.9981	0.4653		8.9981	-0.4621	8.9981	0.249
	9.0083	0.3534	9.0083	0.7685		9.0083	-0.2034	9.0083	0.4506		9.0083	-0.4485	9.0083	0.2269
	9.0186	0.3382	9.0186	0.7155		9.0186	-0.2169	9.0186	0.4433		9.0186	-0.439	9.0186	0.2305
	9.0288	0.307	9.0288	0.668		9.0288	-0.2268	9.0288	0.4351		9.0288	-0.4398	9.0288	0.2104
	9.039	0.2956	9.039	0.6424		9.039	-0.238	9.039	0.4175		9.039	-0.4159	9.039	0.1895
	9.0493	0.2607	9.0493	0.6447		9.0493	-0.2495	9.0493	0.3979		9.0493	-0.361	9.0493	0.1657
	9.0595	0.2302	9.0595	0.6329		9.0595	-0.263	9.0595	0.3728		9.0595	-0.3504	9.0595	0.1212
	9.0698	0.2005	9.0698	0.5974		9.0698	-0.2663	9.0698	0.345		9.0698	-0.3477	9.0698	0.095
	9.08	0.168	9.08	0.5565		9.08	-0.2512	9.08	0.337		9.08	-0.3219	9.08	0.0887
	9.0902	0.1183	9.0902	0.5293		9.0902	-0.2859	9.0902	0.3129		9.0902	-0.3205	9.0902	0.0738
	9.1005	0.0568	9.1005	0.4985		9.1005	-0.2907	9.1005	0.2533		9.1005	-0.3248	9.1005	0.0383
	9.1107	0.0128	9.1107	0.4663		9.1107	-0.2989	9.1107	0.2371		9.1107	-0.3285	9.1107	0.016
	9.121	-0.0241	9.121	0.4603		9.121	-0.3398	9.121	0.2049		9.121	-0.3179	9.121	0.0092
	9.1312	-0.0596	9.1312	0.4517		9.1312	-0.3534	9.1312	0.1644		9.1312	-0.3217	9.1312	-0.0223
	9.1414	-0.0923	9.1414	0.4528		9.1414	-0.3527	9.1414	0.1607		9.1414	-0.3056	9.1414	-0.0346
	9.1517	-0.1186	9.1517	0.4363		9.1517	-0.3506	9.1517	0.1346		9.1517	-0.2669	9.1517	-0.0489
	9.1619	-0.1664	9.1619	0.4286		9.1619	-0.3714	9.1619	0.0866		9.1619	-0.234	9.1619	-0.1115
	9.1722	-0.1744	9.1722	0.4235		9.1722	-0.3908	9.1722	0.0562		9.1722	-0.2328	9.1722	-0.1404
	9.1824	-0.1884	9.1824	0.4089		9.1824	-0.4247	9.1824	0.0598		9.1824	-0.2462	9.1824	-0.1456
	9.1926	-0.2392	9.1926	0.3825		9.1926	-0.433	9.1926	0.03		9.1926	-0.2584	9.1926	-0.1681
	9.2029	-0.258	9.2029	0.3547		9.2029	-0.4451	9.2029	0.0006		9.2029	-0.2371	9.2029	-0.1923
	9.2131	-0.2959	9.2131	0.3512		9.2131	-0.451	9.2131	-0.0334		9.2131	-0.228	9.2131	-0.2157
	9.2234	-0.3405	9.2234	0.3621		9.2234	-0.4563	9.2234	-0.0523		9.2234	-0.213	9.2234	-0.265
	9.2336	-0.3945	9.2336	0.3565		9.2336	-0.4752	9.2336	-0.1157		9.2336	-0.1897	9.2336	-0.3097
	9.2438	-0.4094	9.2438	0.3429		9.2438	-0.5079	9.2438	-0.1863		9.2438	-0.1616	9.2438	-0.3213
	9.2541	-0.4136	9.2541	0.3426		9.2541	-0.5234	9.2541	-0.2294		9.2541	-0.1477	9.2541	-0.3463
	9.2643	-0.4079	9.2643	0.3452		9.2643	-0.5318	9.2643	-0.2305		9.2643	-0.1577	9.2643	-0.3867
	9.2746	-0.4301	9.2746	0.3387		9.2746	-0.5573	9.2746	-0.2172		9.2746	-0.1471	9.2746	-0.3832
	9.2848	-0.4703	9.2848	0.334		9.2848	-0.5663	9.2848	-0.2414		9.2848	-0.1098	9.2848	-0.387
	9.295	-0.5117	9.295	0.3043		9.295	-0.5963	9.295	-0.2689		9.295	-0.0957	9.295	-0.3883
	9.3053	-0.5425	9.3053	0.2533		9.3053	-0.6113	9.3053	-0.2965		9.3053	-0.091	9.3053	-0.4073
	9.3155	-0.5569	9.3155	0.2455		9.3155	-0.6143	9.3155	-0.3221		9.3155	-0.0697	9.3155	-0.4316
	9.3258	-0.5872	9.3258	0.2305		9.3258	-0.6161	9.3258	-0.344		9.3258	-0.0466	9.3258	-0.4612
	9.336	-0.5929	9.336	0.2121		9.336	-0.6398	9.336	-0.3204		9.336	-0.0377	9.336	-0.4805
	9.3462	-0.6032	9.3462	0.1945		9.3462	-0.6703	9.3462	-0.3257		9.3462	-0.0305	9.3462	-0.488
	9.3565	-0.591	9.3565	0.1919		9.3565	-0.7051	9.3565	-0.326		9.3565	-0.0208	9.3565	-0.5222
	9.3667	-0.6218	9.3667	0.1983		9.3667	-0.7233	9.3667	-0.3287		9.3667	-0.0149	9.3667	-0.5323
	9.377	-0.6628	9.377	0.2026		9.377	-0.7245	9.377	-0.3141		9.377	0.0103	9.377	-0.5407
	9.3872	-0.6988	9.3872	0.2189		9.3872	-0.7383	9.3872	-0.3031		9.3872	0.0228	9.3872	-0.5292
	9.3974	-0.7173	9.3974	0.2177		9.3974	-0.7755	9.3974	-0.3763		9.3974	0.0378	9.3974	-0.5435
	9.4077	-0.7337	9.4077	0.1877		9.4077	-0.7946	9.4077	-0.4019		9.4077	0.0259	9.4077	-0.6076
	9.4179	-0.7331	9.4179	0.1443		9.4179	-0.8142	9.4179	-0.4017		9.4179	0.0462	9.4179	-0.6429
	9.4282	-0.735	9.4282	0.1416		9.4282	-0.8163	9.4282	-0.4073		9.4282	0.057	9.4282	-0.6609
	9.4384	-0.7532	9.4384	0.0927		9.4384	-0.8399	9.4384	-0.4069		9.4384	0.0808	9.4384	-0.6507
	9.4486	-0.7624	9.4486	0.0939		9.4486	-0.8308	9.4486	-0.4106		9.4486	0.1107	9.4486	-0.668
	9.4589	-0.8008	9.4589	0.0765		9.4589	-0.8211	9.4589	-0.4008		9.4589	0.119	9.4589	-0.6746
	9.4691	-0.8141	9.4691	0.0563		9.4691	-0.8267	9.4691	-0.399		9.4691	0.132	9.4691	-0.6738
	9.4794	-0.8141	9.4794	0.0459		9.4794	-0.8632	9.4794	-0.3686		9.4794	0.1477	9.4794	-0.6647
	9.4896	-0.8375	9.4896	0.059		9.4896	-0.8591	9.4896	-0.35		9.4896	0.1544	9.4896	-0.649
	9.4998	-0.8409	9.4998	0.0377		9.4998	-0.8641	9.4998	-0.3487		9.4998	0.1648	9.4998	-0.6685
	9.5101	-0.8175	9.5101	0.0212		9.5101	-0.8621	9.5101	-0.3767		9.5101	0.17	9.5101	-0.7024
	9.5203	-0.8321	9.5203	0.0261		9.5203	-0.8713	9.5203	-0.3996		9.5203	0.1612	9.5203	-0.7112
	9.5306	-0.8498	9.5306	0.0147		9.5306	-0.8693	9.5306	-0.4094		9.5306	0.1813	9.5306	-0.7145
	9.5408	-0.8884	9.5408	0.033		9.5408	-0.864	9.5408	-0.4401		9.5408	0.1777	9.5408	-0.7077
	9.551	-0.914	9.551	0.057		9.551	-0.8456	9.551	-0.4415		9.551	0.1611	9.551	-0.7033
	9.5613	-0.913	9.5613	0.0462		9.5613	-0.838	9.5613	-0.4263		9.5613	0.1916	9.5613	-0.6841
	9.5715	-0.9232	9.5715	0.0232		9.5715	-0.8181	9.5715	-0.4225		9.5715	0.2147	9.5715	-0.6591
	9.5818	-0.9299	9.5818	0.016		9.5818	-0.7782	9.5818	-0.4375		9.5818	0.2218	9.5818	-0.6418
	9.592	-0.9587	9.592	0.0216		9.592	-0.7641	9.592	-0.4419		9.592	0.2314	9.592	-0.6519
	9.6022	-0.966	9.6022	0.0182		9.6022	-0.7643	9.6022	-0.446		9.6022	0.2308	9.6022	-0.6605
	9.6125	-0.9832	9.6125	0.0185		9.6125	-0.7573	9.6125	-0.439		9.6125	0.2312	9.6125	-0.6739
	9.6227	-0.9971	9.6227	0.0023		9.6227	-0.7279	9.6227	-0.4319		9.6227	0.2022	9.6227	-0.6556
	9.633	-1.0196	9.633	-0.0249		9.633	-0.7116	9.633	-0.4433		9.633	0.1806	9.633	-0.623
	9.6432	-1.044	9.6432	-0.0314		9.6432	-0.6968	9.6432	-0.4554		9.6432	0.1891	9.6432	-0.5868
	9.6534	-1.0623	9.6534	-0.046		9.6534	-0.6929	9.6534	-0.4654		9.6534	0.2104	9.6534	-0.5969
	9.6637	-1.0742	9.6637	-0.0485		9.6637	-0.6893	9.6637	-0.4627		9.6637	0.2097	9.6637	-0.6051
	9.6739	-1.0822	9.6739	-0.0337		9.6739	-0.6741	9.6739	-0.4643		9.6739	0.1803	9.6739	-0.5852
	9.6842	-1.103	9.6842	-0.029		9.6842	-0.6505	9.6842	-0.4596		9.6842	0.1724	9.6842	-0.5593
	9.6944	-1.0714	9.6944	-0.0386		9.6944	-0.6396	9.6944	-0.4308		9.6944	0.2071	9.6944	-0.5356
	9.7046	-1.0921	9.7046	-0.0626		9.7046	-0.6229	9.7046	-0.4042		9.7046	0.1927	9.7046	-0.5312
	9.7149	-1.0944	9.7149	-0.0575		9.7149	-0.6025	9.7149	-0.4153		9.7149	0.2038	9.7149	-0.4931
	9.7251	-1.1152	9.7251	-0.0463		9.7251	-0.5949	9.7251	-0.4332		9.7251	0.2202	9.7251	-0.4988
	9.7354	-1.1344	9.7354	-0.0296		9.7354	-0.552	9.7354	-0.4205		9.7354	0.2149	9.7354	-0.5206
	9.7456	-1.1321	9.7456	-0.0513		9.7456	-0.537	9.7456	-0.4148		9.7456	0.1861	9.7456	-0.4946
	9.7558	-1.1271	9.7558	-0.0531		9.7558	-0.5224	9.7558	-0.4413		9.7558	0.183	9.7558	-0.4728
	9.7661	-1.082	9.7661	-0.0357		9.7661	-0.5095	9.7661	-0.4134		9.7661	0.179	9.7661	-0.4701
	9.7763	-1.0547	9.7763	-0.0156		9.7763	-0.4837	9.7763	-0.3771		9.7763	0.1761	9.7763	-0.435
	9.7866	-1.0546	9.7866	0.0207		9.7866	-0.46	9.7866	-0.346		9.7866	0.1651	9.7866	-0.4093
	9.7968	-1.0679	9.7968	0.0536		9.7968	-0.4419	9.7968	-0.3081		9.7968	0.1559	9.7968	-0.3954
	9.807	-1.0824	9.807	0.0642		9.807	-0.4179	9.807	-0.3346		9.807	0.1598	9.807	-0.4024
	9.8173	-1.0813	9.8173	0.0885		9.8173	-0.4114	9.8173	-0.3562		9.8173	0.1515	9.8173	-0.3656
	9.8275	-1.0752	9.8275	0.1184		9.8275	-0.3697	9.8275	-0.3792		9.8275	0.1343	9.8275	-0.3331
	9.8378	-1.0138	9.8378	0.137		9.8378	-0.335	9.8378	-0.3696		9.8378	0.1344	9.8378	-0.3269
	9.848	-1.0082	9.848	0.1643		9.848	-0.3318	9.848	-0.3543		9.848	0.1143	9.848	-0.3304
	9.8582	-0.9989	9.8582	0.1925		9.8582	-0.3145	9.8582	-0.3319		9.8582	0.0816	9.8582	-0.3231
	9.8685	-0.9915	9.8685	0.2382		9.8685	-0.3045	9.8685	-0.3332		9.8685	0.0617	9.8685	-0.3171
	9.8787	-0.9988	9.8787	0.3041		9.8787	-0.2994	9.8787	-0.3147		9.8787	0.0831	9.8787	-0.3033
	9.889	-0.9891	9.889	0.36		9.889	-0.2599	9.889	-0.2921		9.889	0.0823	9.889	-0.3039
	9.8992	-0.9471	9.8992	0.3943		9.8992	-0.2558	9.8992	-0.302		9.8992	0.0997	9.8992	-0.2545
	9.9094	-0.9459	9.9094	0.3971		9.9094	-0.2489	9.9094	-0.3169		9.9094	0.104	9.9094	-0.2363
	9.9197	-0.8987	9.9197	0.4257		9.9197	-0.2059	9.9197	-0.3171		9.9197	0.1092	9.9197	-0.2195
	9.9299	-0.8416	9.9299	0.4303		9.9299	-0.1641	9.9299	-0.3135		9.9299	0.0966	9.9299	-0.1985
	9.9402	-0.8099	9.9402	0.4499		9.9402	-0.158	9.9402	-0.3341		9.9402	0.0903	9.9402	-0.1777
	9.9504	-0.795	9.9504	0.4909		9.9504	-0.186	9.9504	-0.3178		9.9504	0.0802	9.9504	-0.1632
	9.9606	-0.7737	9.9606	0.4954		9.9606	-0.1989	9.9606	-0.3326		9.9606	0.0894	9.9606	-0.1725
	9.9709	-0.7467	9.9709	0.4912		9.9709	-0.1781	9.9709	-0.3583		9.9709	0.089	9.9709	-0.1637
	9.9811	-0.7404	9.9811	0.5146		9.9811	-0.1817	9.9811	-0.3604		9.9811	0.0825	9.9811	-0.1579
	9.9914	-0.7354	9.9914	0.5529		9.9914	-0.173	9.9914	-0.3588		9.9914	0.0635	9.9914	-0.1242
	10.0016	-0.7141	10.0016	0.5826		10.0016	-0.1667	10.0016	-0.3711		10.0016	0.0803	10.0016	-0.0703

## Sheet: panel I
	left panel					middle panel					right panel
	Ipsi		Contra			Ipsi		Contra			Ipsi		Contra
	Time (ms)	Vm rel (mV)	Time (ms)	Vm rel (mV)		Time (ms)	Vm rel (mV)	Time (ms)	Vm rel (mV)		Time (ms)	Vm rel (mV)	Time (ms)	Vm rel (mV)
	2.9974	-0.0137	3.2944	-0.7004		2.9974	-0.0137	2.9974	-0.7004		2.9974	-0.0137	2.7005	-0.7004
	3.0077	-0.0202	3.3046	-0.7247		3.0077	-0.0202	3.0077	-0.7247		3.0077	-0.0202	2.7107	-0.7247
	3.0179	-0.0367	3.3149	-0.753		3.0179	-0.0367	3.0179	-0.753		3.0179	-0.0367	2.721	-0.753
	3.0282	-0.0501	3.3251	-0.7587		3.0282	-0.0501	3.0282	-0.7587		3.0282	-0.0501	2.7312	-0.7587
	3.0384	-0.033	3.3354	-0.7563		3.0384	-0.033	3.0384	-0.7563		3.0384	-0.033	2.7414	-0.7563
	3.0486	-0.0554	3.3456	-0.732		3.0486	-0.0554	3.0486	-0.732		3.0486	-0.0554	2.7517	-0.732
	3.0589	-0.0544	3.3558	-0.7386		3.0589	-0.0544	3.0589	-0.7386		3.0589	-0.0544	2.7619	-0.7386
	3.0691	-0.0742	3.3661	-0.7384		3.0691	-0.0742	3.0691	-0.7384		3.0691	-0.0742	2.7722	-0.7384
	3.0794	-0.0775	3.3763	-0.7588		3.0794	-0.0775	3.0794	-0.7588		3.0794	-0.0775	2.7824	-0.7588
	3.0896	-0.1037	3.3866	-0.7652		3.0896	-0.1037	3.0896	-0.7652		3.0896	-0.1037	2.7926	-0.7652
	3.0998	-0.115	3.3968	-0.7299		3.0998	-0.115	3.0998	-0.7299		3.0998	-0.115	2.8029	-0.7299
	3.1101	-0.1106	3.407	-0.6859		3.1101	-0.1106	3.1101	-0.6859		3.1101	-0.1106	2.8131	-0.6859
	3.1203	-0.1179	3.4173	-0.7141		3.1203	-0.1179	3.1203	-0.7141		3.1203	-0.1179	2.8234	-0.7141
	3.1306	-0.1167	3.4275	-0.7085		3.1306	-0.1167	3.1306	-0.7085		3.1306	-0.1167	2.8336	-0.7085
	3.1408	-0.1297	3.4378	-0.6996		3.1408	-0.1297	3.1408	-0.6996		3.1408	-0.1297	2.8438	-0.6996
	3.151	-0.1502	3.448	-0.6675		3.151	-0.1502	3.151	-0.6675		3.151	-0.1502	2.8541	-0.6675
	3.1613	-0.1515	3.4582	-0.6578		3.1613	-0.1515	3.1613	-0.6578		3.1613	-0.1515	2.8643	-0.6578
	3.1715	-0.1475	3.4685	-0.6715		3.1715	-0.1475	3.1715	-0.6715		3.1715	-0.1475	2.8746	-0.6715
	3.1818	-0.1605	3.4787	-0.6311		3.1818	-0.1605	3.1818	-0.6311		3.1818	-0.1605	2.8848	-0.6311
	3.192	-0.1481	3.489	-0.5876		3.192	-0.1481	3.192	-0.5876		3.192	-0.1481	2.895	-0.5876
	3.2022	-0.1403	3.4992	-0.5855		3.2022	-0.1403	3.2022	-0.5855		3.2022	-0.1403	2.9053	-0.5855
	3.2125	-0.1764	3.5094	-0.5944		3.2125	-0.1764	3.2125	-0.5944		3.2125	-0.1764	2.9155	-0.5944
	3.2227	-0.1736	3.5197	-0.5901		3.2227	-0.1736	3.2227	-0.5901		3.2227	-0.1736	2.9258	-0.5901
	3.233	-0.1852	3.5299	-0.593		3.233	-0.1852	3.233	-0.593		3.233	-0.1852	2.936	-0.593
	3.2432	-0.2131	3.5402	-0.5596		3.2432	-0.2131	3.2432	-0.5596		3.2432	-0.2131	2.9462	-0.5596
	3.2534	-0.214	3.5504	-0.5067		3.2534	-0.214	3.2534	-0.5067		3.2534	-0.214	2.9565	-0.5067
	3.2637	-0.207	3.5606	-0.5032		3.2637	-0.207	3.2637	-0.5032		3.2637	-0.207	2.9667	-0.5032
	3.2739	-0.185	3.5709	-0.5127		3.2739	-0.185	3.2739	-0.5127		3.2739	-0.185	2.977	-0.5127
	3.2842	-0.1927	3.5811	-0.5088		3.2842	-0.1927	3.2842	-0.5088		3.2842	-0.1927	2.9872	-0.5088
	3.2944	-0.2006	3.5914	-0.4743		3.2944	-0.2006	3.2944	-0.4743		3.2944	-0.2006	2.9974	-0.4743
	3.3046	-0.1857	3.6016	-0.453		3.3046	-0.1857	3.3046	-0.453		3.3046	-0.1857	3.0077	-0.453
	3.3149	-0.1762	3.6118	-0.4431		3.3149	-0.1762	3.3149	-0.4431		3.3149	-0.1762	3.0179	-0.4431
	3.3251	-0.1765	3.6221	-0.4303		3.3251	-0.1765	3.3251	-0.4303		3.3251	-0.1765	3.0282	-0.4303
	3.3354	-0.1771	3.6323	-0.4152		3.3354	-0.1771	3.3354	-0.4152		3.3354	-0.1771	3.0384	-0.4152
	3.3456	-0.1598	3.6426	-0.4112		3.3456	-0.1598	3.3456	-0.4112		3.3456	-0.1598	3.0486	-0.4112
	3.3558	-0.1465	3.6528	-0.4023		3.3558	-0.1465	3.3558	-0.4023		3.3558	-0.1465	3.0589	-0.4023
	3.3661	-0.1524	3.663	-0.3853		3.3661	-0.1524	3.3661	-0.3853		3.3661	-0.1524	3.0691	-0.3853
	3.3763	-0.1495	3.6733	-0.3759		3.3763	-0.1495	3.3763	-0.3759		3.3763	-0.1495	3.0794	-0.3759
	3.3866	-0.143	3.6835	-0.4021		3.3866	-0.143	3.3866	-0.4021		3.3866	-0.143	3.0896	-0.4021
	3.3968	-0.1417	3.6938	-0.3958		3.3968	-0.1417	3.3968	-0.3958		3.3968	-0.1417	3.0998	-0.3958
	3.407	-0.1186	3.704	-0.3891		3.407	-0.1186	3.407	-0.3891		3.407	-0.1186	3.1101	-0.3891
	3.4173	-0.1035	3.7142	-0.3998		3.4173	-0.1035	3.4173	-0.3998		3.4173	-0.1035	3.1203	-0.3998
	3.4275	-0.0791	3.7245	-0.4108		3.4275	-0.0791	3.4275	-0.4108		3.4275	-0.0791	3.1306	-0.4108
	3.4378	-0.0886	3.7347	-0.4424		3.4378	-0.0886	3.4378	-0.4424		3.4378	-0.0886	3.1408	-0.4424
	3.448	-0.0744	3.745	-0.4584		3.448	-0.0744	3.448	-0.4584		3.448	-0.0744	3.151	-0.4584
	3.4582	-0.0456	3.7552	-0.4706		3.4582	-0.0456	3.4582	-0.4706		3.4582	-0.0456	3.1613	-0.4706
	3.4685	-0.0354	3.7654	-0.4751		3.4685	-0.0354	3.4685	-0.4751		3.4685	-0.0354	3.1715	-0.4751
	3.4787	-0.003	3.7757	-0.4764		3.4787	-0.003	3.4787	-0.4764		3.4787	-0.003	3.1818	-0.4764
	3.489	0.0381	3.7859	-0.5043		3.489	0.0381	3.489	-0.5043		3.489	0.0381	3.192	-0.5043
	3.4992	0.0709	3.7962	-0.5074		3.4992	0.0709	3.4992	-0.5074		3.4992	0.0709	3.2022	-0.5074
	3.5094	0.0748	3.8064	-0.4992		3.5094	0.0748	3.5094	-0.4992		3.5094	0.0748	3.2125	-0.4992
	3.5197	0.072	3.8166	-0.4889		3.5197	0.072	3.5197	-0.4889		3.5197	0.072	3.2227	-0.4889
	3.5299	0.065	3.8269	-0.4898		3.5299	0.065	3.5299	-0.4898		3.5299	0.065	3.233	-0.4898
	3.5402	0.0669	3.8371	-0.4692		3.5402	0.0669	3.5402	-0.4692		3.5402	0.0669	3.2432	-0.4692
	3.5504	0.0866	3.8474	-0.4627		3.5504	0.0866	3.5504	-0.4627		3.5504	0.0866	3.2534	-0.4627
	3.5606	0.1009	3.8576	-0.4632		3.5606	0.1009	3.5606	-0.4632		3.5606	0.1009	3.2637	-0.4632
	3.5709	0.1153	3.8678	-0.4566		3.5709	0.1153	3.5709	-0.4566		3.5709	0.1153	3.2739	-0.4566
	3.5811	0.1395	3.8781	-0.4057		3.5811	0.1395	3.5811	-0.4057		3.5811	0.1395	3.2842	-0.4057
	3.5914	0.1645	3.8883	-0.369		3.5914	0.1645	3.5914	-0.369		3.5914	0.1645	3.2944	-0.369
	3.6016	0.1842	3.8986	-0.3671		3.6016	0.1842	3.6016	-0.3671		3.6016	0.1842	3.3046	-0.3671
	3.6118	0.2041	3.9088	-0.3971		3.6118	0.2041	3.6118	-0.3971		3.6118	0.2041	3.3149	-0.3971
	3.6221	0.2156	3.919	-0.4204		3.6221	0.2156	3.6221	-0.4204		3.6221	0.2156	3.3251	-0.4204
	3.6323	0.2441	3.9293	-0.4418		3.6323	0.2441	3.6323	-0.4418		3.6323	0.2441	3.3354	-0.4418
	3.6426	0.2638	3.9395	-0.4649		3.6426	0.2638	3.6426	-0.4649		3.6426	0.2638	3.3456	-0.4649
	3.6528	0.2689	3.9498	-0.4828		3.6528	0.2689	3.6528	-0.4828		3.6528	0.2689	3.3558	-0.4828
	3.663	0.285	3.96	-0.4554		3.663	0.285	3.663	-0.4554		3.663	0.285	3.3661	-0.4554
	3.6733	0.2977	3.9702	-0.4203		3.6733	0.2977	3.6733	-0.4203		3.6733	0.2977	3.3763	-0.4203
	3.6835	0.3065	3.9805	-0.3914		3.6835	0.3065	3.6835	-0.3914		3.6835	0.3065	3.3866	-0.3914
	3.6938	0.3276	3.9907	-0.3762		3.6938	0.3276	3.6938	-0.3762		3.6938	0.3276	3.3968	-0.3762
	3.704	0.3338	4.001	-0.3879		3.704	0.3338	3.704	-0.3879		3.704	0.3338	3.407	-0.3879
	3.7142	0.3484	4.0112	-0.3739		3.7142	0.3484	3.7142	-0.3739		3.7142	0.3484	3.4173	-0.3739
	3.7245	0.3504	4.0214	-0.3554		3.7245	0.3504	3.7245	-0.3554		3.7245	0.3504	3.4275	-0.3554
	3.7347	0.3223	4.0317	-0.3464		3.7347	0.3223	3.7347	-0.3464		3.7347	0.3223	3.4378	-0.3464
	3.745	0.322	4.0419	-0.3128		3.745	0.322	3.745	-0.3128		3.745	0.322	3.448	-0.3128
	3.7552	0.3148	4.0522	-0.3114		3.7552	0.3148	3.7552	-0.3114		3.7552	0.3148	3.4582	-0.3114
	3.7654	0.353	4.0624	-0.3022		3.7654	0.353	3.7654	-0.3022		3.7654	0.353	3.4685	-0.3022
	3.7757	0.3567	4.0726	-0.2753		3.7757	0.3567	3.7757	-0.2753		3.7757	0.3567	3.4787	-0.2753
	3.7859	0.375	4.0829	-0.2456		3.7859	0.375	3.7859	-0.2456		3.7859	0.375	3.489	-0.2456
	3.7962	0.3916	4.0931	-0.2158		3.7962	0.3916	3.7962	-0.2158		3.7962	0.3916	3.4992	-0.2158
	3.8064	0.3934	4.1034	-0.2231		3.8064	0.3934	3.8064	-0.2231		3.8064	0.3934	3.5094	-0.2231
	3.8166	0.4168	4.1136	-0.2037		3.8166	0.4168	3.8166	-0.2037		3.8166	0.4168	3.5197	-0.2037
	3.8269	0.4482	4.1238	-0.1833		3.8269	0.4482	3.8269	-0.1833		3.8269	0.4482	3.5299	-0.1833
	3.8371	0.4438	4.1341	-0.1565		3.8371	0.4438	3.8371	-0.1565		3.8371	0.4438	3.5402	-0.1565
	3.8474	0.4356	4.1443	-0.1202		3.8474	0.4356	3.8474	-0.1202		3.8474	0.4356	3.5504	-0.1202
	3.8576	0.4314	4.1546	-0.0995		3.8576	0.4314	3.8576	-0.0995		3.8576	0.4314	3.5606	-0.0995
	3.8678	0.4304	4.1648	-0.0974		3.8678	0.4304	3.8678	-0.0974		3.8678	0.4304	3.5709	-0.0974
	3.8781	0.4287	4.175	-0.0874		3.8781	0.4287	3.8781	-0.0874		3.8781	0.4287	3.5811	-0.0874
	3.8883	0.4604	4.1853	-0.075		3.8883	0.4604	3.8883	-0.075		3.8883	0.4604	3.5914	-0.075
	3.8986	0.4676	4.1955	-0.0452		3.8986	0.4676	3.8986	-0.0452		3.8986	0.4676	3.6016	-0.0452
	3.9088	0.4779	4.2058	-0.0115		3.9088	0.4779	3.9088	-0.0115		3.9088	0.4779	3.6118	-0.0115
	3.919	0.4933	4.216	0.0333		3.919	0.4933	3.919	0.0333		3.919	0.4933	3.6221	0.0333
	3.9293	0.5009	4.2262	0.0523		3.9293	0.5009	3.9293	0.0523		3.9293	0.5009	3.6323	0.0523
	3.9395	0.5042	4.2365	0.079		3.9395	0.5042	3.9395	0.079		3.9395	0.5042	3.6426	0.079
	3.9498	0.5255	4.2467	0.114		3.9498	0.5255	3.9498	0.114		3.9498	0.5255	3.6528	0.114
	3.96	0.5716	4.257	0.1655		3.96	0.5716	3.96	0.1655		3.96	0.5716	3.663	0.1655
	3.9702	0.6013	4.2672	0.1917		3.9702	0.6013	3.9702	0.1917		3.9702	0.6013	3.6733	0.1917
	3.9805	0.6075	4.2774	0.193		3.9805	0.6075	3.9805	0.193		3.9805	0.6075	3.6835	0.193
	3.9907	0.6135	4.2877	0.2184		3.9907	0.6135	3.9907	0.2184		3.9907	0.6135	3.6938	0.2184
	4.001	0.645	4.2979	0.2406		4.001	0.645	4.001	0.2406		4.001	0.645	3.704	0.2406
	4.0112	0.6692	4.3082	0.2583		4.0112	0.6692	4.0112	0.2583		4.0112	0.6692	3.7142	0.2583
	4.0214	0.6706	4.3184	0.2996		4.0214	0.6706	4.0214	0.2996		4.0214	0.6706	3.7245	0.2996
	4.0317	0.6419	4.3286	0.3245		4.0317	0.6419	4.0317	0.3245		4.0317	0.6419	3.7347	0.3245
	4.0419	0.6412	4.3389	0.3433		4.0419	0.6412	4.0419	0.3433		4.0419	0.6412	3.745	0.3433
	4.0522	0.6347	4.3491	0.3631		4.0522	0.6347	4.0522	0.3631		4.0522	0.6347	3.7552	0.3631
	4.0624	0.6467	4.3594	0.3861		4.0624	0.6467	4.0624	0.3861		4.0624	0.6467	3.7654	0.3861
	4.0726	0.6509	4.3696	0.413		4.0726	0.6509	4.0726	0.413		4.0726	0.6509	3.7757	0.413
	4.0829	0.6793	4.3798	0.4557		4.0829	0.6793	4.0829	0.4557		4.0829	0.6793	3.7859	0.4557
	4.0931	0.6678	4.3901	0.532		4.0931	0.6678	4.0931	0.532		4.0931	0.6678	3.7962	0.532
	4.1034	0.6622	4.4003	0.5969		4.1034	0.6622	4.1034	0.5969		4.1034	0.6622	3.8064	0.5969
	4.1136	0.6755	4.4106	0.6461		4.1136	0.6755	4.1136	0.6461		4.1136	0.6755	3.8166	0.6461
	4.1238	0.6905	4.4208	0.6777		4.1238	0.6905	4.1238	0.6777		4.1238	0.6905	3.8269	0.6777
	4.1341	0.7004	4.431	0.668		4.1341	0.7004	4.1341	0.668		4.1341	0.7004	3.8371	0.668
	4.1443	0.6967	4.4413	0.6666		4.1443	0.6967	4.1443	0.6666		4.1443	0.6967	3.8474	0.6666
	4.1546	0.6938	4.4515	0.682		4.1546	0.6938	4.1546	0.682		4.1546	0.6938	3.8576	0.682
	4.1648	0.7098	4.4618	0.7213		4.1648	0.7098	4.1648	0.7213		4.1648	0.7098	3.8678	0.7213
	4.175	0.7243	4.472	0.7603		4.175	0.7243	4.175	0.7603		4.175	0.7243	3.8781	0.7603
	4.1853	0.7209	4.4822	0.7626		4.1853	0.7209	4.1853	0.7626		4.1853	0.7209	3.8883	0.7626
	4.1955	0.72	4.4925	0.7734		4.1955	0.72	4.1955	0.7734		4.1955	0.72	3.8986	0.7734
	4.2058	0.7002	4.5027	0.7973		4.2058	0.7002	4.2058	0.7973		4.2058	0.7002	3.9088	0.7973
	4.216	0.7294	4.513	0.8298		4.216	0.7294	4.216	0.8298		4.216	0.7294	3.919	0.8298
	4.2262	0.7486	4.5232	0.8588		4.2262	0.7486	4.2262	0.8588		4.2262	0.7486	3.9293	0.8588
	4.2365	0.7306	4.5334	0.8437		4.2365	0.7306	4.2365	0.8437		4.2365	0.7306	3.9395	0.8437
	4.2467	0.7413	4.5437	0.8403		4.2467	0.7413	4.2467	0.8403		4.2467	0.7413	3.9498	0.8403
	4.257	0.7352	4.5539	0.866		4.257	0.7352	4.257	0.866		4.257	0.7352	3.96	0.866
	4.2672	0.7492	4.5642	0.8589		4.2672	0.7492	4.2672	0.8589		4.2672	0.7492	3.9702	0.8589
	4.2774	0.7844	4.5744	0.8822		4.2774	0.7844	4.2774	0.8822		4.2774	0.7844	3.9805	0.8822
	4.2877	0.7932	4.5846	0.8879		4.2877	0.7932	4.2877	0.8879		4.2877	0.7932	3.9907	0.8879
	4.2979	0.8089	4.5949	0.9134		4.2979	0.8089	4.2979	0.9134		4.2979	0.8089	4.001	0.9134
	4.3082	0.8158	4.6051	0.9172		4.3082	0.8158	4.3082	0.9172		4.3082	0.8158	4.0112	0.9172
	4.3184	0.8178	4.6154	0.9207		4.3184	0.8178	4.3184	0.9207		4.3184	0.8178	4.0214	0.9207
	4.3286	0.7848	4.6256	0.9255		4.3286	0.7848	4.3286	0.9255		4.3286	0.7848	4.0317	0.9255
	4.3389	0.7711	4.6358	0.9343		4.3389	0.7711	4.3389	0.9343		4.3389	0.7711	4.0419	0.9343
	4.3491	0.7655	4.6461	0.9415		4.3491	0.7655	4.3491	0.9415		4.3491	0.7655	4.0522	0.9415
	4.3594	0.7586	4.6563	0.9167		4.3594	0.7586	4.3594	0.9167		4.3594	0.7586	4.0624	0.9167
	4.3696	0.7647	4.6666	0.9022		4.3696	0.7647	4.3696	0.9022		4.3696	0.7647	4.0726	0.9022
	4.3798	0.7527	4.6768	0.8961		4.3798	0.7527	4.3798	0.8961		4.3798	0.7527	4.0829	0.8961
	4.3901	0.7385	4.687	0.8902		4.3901	0.7385	4.3901	0.8902		4.3901	0.7385	4.0931	0.8902
	4.4003	0.7209	4.6973	0.8658		4.4003	0.7209	4.4003	0.8658		4.4003	0.7209	4.1034	0.8658
	4.4106	0.7288	4.7075	0.9008		4.4106	0.7288	4.4106	0.9008		4.4106	0.7288	4.1136	0.9008
	4.4208	0.7431	4.7178	0.9254		4.4208	0.7431	4.4208	0.9254		4.4208	0.7431	4.1238	0.9254
	4.431	0.7303	4.728	0.904		4.431	0.7303	4.431	0.904		4.431	0.7303	4.1341	0.904
	4.4413	0.6926	4.7382	0.8873		4.4413	0.6926	4.4413	0.8873		4.4413	0.6926	4.1443	0.8873
	4.4515	0.6695	4.7485	0.888		4.4515	0.6695	4.4515	0.888		4.4515	0.6695	4.1546	0.888
	4.4618	0.6815	4.7587	0.8607		4.4618	0.6815	4.4618	0.8607		4.4618	0.6815	4.1648	0.8607
	4.472	0.6979	4.769	0.8258		4.472	0.6979	4.472	0.8258		4.472	0.6979	4.175	0.8258
	4.4822	0.6932	4.7792	0.7717		4.4822	0.6932	4.4822	0.7717		4.4822	0.6932	4.1853	0.7717
	4.4925	0.711	4.7894	0.7497		4.4925	0.711	4.4925	0.7497		4.4925	0.711	4.1955	0.7497
	4.5027	0.7098	4.7997	0.7186		4.5027	0.7098	4.5027	0.7186		4.5027	0.7098	4.2058	0.7186
	4.513	0.6863	4.8099	0.7		4.513	0.6863	4.513	0.7		4.513	0.6863	4.216	0.7
	4.5232	0.6455	4.8202	0.6655		4.5232	0.6455	4.5232	0.6655		4.5232	0.6455	4.2262	0.6655
	4.5334	0.6223	4.8304	0.6616		4.5334	0.6223	4.5334	0.6616		4.5334	0.6223	4.2365	0.6616
	4.5437	0.6192	4.8406	0.6276		4.5437	0.6192	4.5437	0.6276		4.5437	0.6192	4.2467	0.6276
	4.5539	0.5964	4.8509	0.5816		4.5539	0.5964	4.5539	0.5816		4.5539	0.5964	4.257	0.5816
	4.5642	0.5977	4.8611	0.556		4.5642	0.5977	4.5642	0.556		4.5642	0.5977	4.2672	0.556
	4.5744	0.5968	4.8714	0.5223		4.5744	0.5968	4.5744	0.5223		4.5744	0.5968	4.2774	0.5223
	4.5846	0.5815	4.8816	0.5015		4.5846	0.5815	4.5846	0.5015		4.5846	0.5815	4.2877	0.5015
	4.5949	0.5752	4.8918	0.444		4.5949	0.5752	4.5949	0.444		4.5949	0.5752	4.2979	0.444
	4.6051	0.5387	4.9021	0.4144		4.6051	0.5387	4.6051	0.4144		4.6051	0.5387	4.3082	0.4144
	4.6154	0.4998	4.9123	0.3977		4.6154	0.4998	4.6154	0.3977		4.6154	0.4998	4.3184	0.3977
	4.6256	0.4553	4.9226	0.3711		4.6256	0.4553	4.6256	0.3711		4.6256	0.4553	4.3286	0.3711
	4.6358	0.3777	4.9328	0.3581		4.6358	0.3777	4.6358	0.3581		4.6358	0.3777	4.3389	0.3581
	4.6461	0.3293	4.943	0.3119		4.6461	0.3293	4.6461	0.3119		4.6461	0.3293	4.3491	0.3119
	4.6563	0.3155	4.9533	0.2788		4.6563	0.3155	4.6563	0.2788		4.6563	0.3155	4.3594	0.2788
	4.6666	0.3042	4.9635	0.2635		4.6666	0.3042	4.6666	0.2635		4.6666	0.3042	4.3696	0.2635
	4.6768	0.2565	4.9738	0.241		4.6768	0.2565	4.6768	0.241		4.6768	0.2565	4.3798	0.241
	4.687	0.2517	4.984	0.2413		4.687	0.2517	4.687	0.2413		4.687	0.2517	4.3901	0.2413
	4.6973	0.2219	4.9942	0.2236		4.6973	0.2219	4.6973	0.2236		4.6973	0.2219	4.4003	0.2236
	4.7075	0.1827	5.0045	0.2004		4.7075	0.1827	4.7075	0.2004		4.7075	0.1827	4.4106	0.2004
	4.7178	0.1732	5.0147	0.1768		4.7178	0.1732	4.7178	0.1768		4.7178	0.1732	4.4208	0.1768
	4.728	0.1602	5.025	0.1475		4.728	0.1602	4.728	0.1475		4.728	0.1602	4.431	0.1475
	4.7382	0.1132	5.0352	0.1308		4.7382	0.1132	4.7382	0.1308		4.7382	0.1132	4.4413	0.1308
	4.7485	0.0981	5.0454	0.1282		4.7485	0.0981	4.7485	0.1282		4.7485	0.0981	4.4515	0.1282
	4.7587	0.0997	5.0557	0.1239		4.7587	0.0997	4.7587	0.1239		4.7587	0.0997	4.4618	0.1239
	4.769	0.0829	5.0659	0.0931		4.769	0.0829	4.769	0.0931		4.769	0.0829	4.472	0.0931
	4.7792	0.0353	5.0762	0.0891		4.7792	0.0353	4.7792	0.0891		4.7792	0.0353	4.4822	0.0891
	4.7894	0.0107	5.0864	0.07		4.7894	0.0107	4.7894	0.07		4.7894	0.0107	4.4925	0.07
	4.7997	-0.0089	5.0966	0.0572		4.7997	-0.0089	4.7997	0.0572		4.7997	-0.0089	4.5027	0.0572
	4.8099	-0.0338	5.1069	0.0577		4.8099	-0.0338	4.8099	0.0577		4.8099	-0.0338	4.513	0.0577
	4.8202	-0.0676	5.1171	0.0567		4.8202	-0.0676	4.8202	0.0567		4.8202	-0.0676	4.5232	0.0567
	4.8304	-0.1191	5.1274	0.0553		4.8304	-0.1191	4.8304	0.0553		4.8304	-0.1191	4.5334	0.0553
	4.8406	-0.1279	5.1376	0.0419		4.8406	-0.1279	4.8406	0.0419		4.8406	-0.1279	4.5437	0.0419
	4.8509	-0.1347	5.1478	0.0117		4.8509	-0.1347	4.8509	0.0117		4.8509	-0.1347	4.5539	0.0117
	4.8611	-0.1652	5.1581	-0.0107		4.8611	-0.1652	4.8611	-0.0107		4.8611	-0.1652	4.5642	-0.0107
	4.8714	-0.1832	5.1683	-0.0198		4.8714	-0.1832	4.8714	-0.0198		4.8714	-0.1832	4.5744	-0.0198
	4.8816	-0.1849	5.1786	-0.0431		4.8816	-0.1849	4.8816	-0.0431		4.8816	-0.1849	4.5846	-0.0431
	4.8918	-0.1939	5.1888	-0.0831		4.8918	-0.1939	4.8918	-0.0831		4.8918	-0.1939	4.5949	-0.0831
	4.9021	-0.2122	5.199	-0.0949		4.9021	-0.2122	4.9021	-0.0949		4.9021	-0.2122	4.6051	-0.0949
	4.9123	-0.2385	5.2093	-0.11		4.9123	-0.2385	4.9123	-0.11		4.9123	-0.2385	4.6154	-0.11
	4.9226	-0.2181	5.2195	-0.1463		4.9226	-0.2181	4.9226	-0.1463		4.9226	-0.2181	4.6256	-0.1463
	4.9328	-0.2332	5.2298	-0.1814		4.9328	-0.2332	4.9328	-0.1814		4.9328	-0.2332	4.6358	-0.1814
	4.943	-0.2353	5.24	-0.2191		4.943	-0.2353	4.943	-0.2191		4.943	-0.2353	4.6461	-0.2191
	4.9533	-0.2538	5.2502	-0.2504		4.9533	-0.2538	4.9533	-0.2504		4.9533	-0.2538	4.6563	-0.2504
	4.9635	-0.2399	5.2605	-0.2586		4.9635	-0.2399	4.9635	-0.2586		4.9635	-0.2399	4.6666	-0.2586
	4.9738	-0.2534	5.2707	-0.2932		4.9738	-0.2534	4.9738	-0.2932		4.9738	-0.2534	4.6768	-0.2932
	4.984	-0.2614	5.281	-0.3116		4.984	-0.2614	4.984	-0.3116		4.984	-0.2614	4.687	-0.3116
	4.9942	-0.2478	5.2912	-0.3298		4.9942	-0.2478	4.9942	-0.3298		4.9942	-0.2478	4.6973	-0.3298
	5.0045	-0.2208	5.3014	-0.3196		5.0045	-0.2208	5.0045	-0.3196		5.0045	-0.2208	4.7075	-0.3196
	5.0147	-0.1939	5.3117	-0.356		5.0147	-0.1939	5.0147	-0.356		5.0147	-0.1939	4.7178	-0.356
	5.025	-0.1885	5.3219	-0.3911		5.025	-0.1885	5.025	-0.3911		5.025	-0.1885	4.728	-0.3911
	5.0352	-0.1788	5.3322	-0.4063		5.0352	-0.1788	5.0352	-0.4063		5.0352	-0.1788	4.7382	-0.4063
	5.0454	-0.1803	5.3424	-0.4609		5.0454	-0.1803	5.0454	-0.4609		5.0454	-0.1803	4.7485	-0.4609
	5.0557	-0.1677	5.3526	-0.5003		5.0557	-0.1677	5.0557	-0.5003		5.0557	-0.1677	4.7587	-0.5003
	5.0659	-0.1192	5.3629	-0.5365		5.0659	-0.1192	5.0659	-0.5365		5.0659	-0.1192	4.769	-0.5365
	5.0762	-0.1051	5.3731	-0.5737		5.0762	-0.1051	5.0762	-0.5737		5.0762	-0.1051	4.7792	-0.5737
	5.0864	-0.0975	5.3834	-0.6268		5.0864	-0.0975	5.0864	-0.6268		5.0864	-0.0975	4.7894	-0.6268
	5.0966	-0.0914	5.3936	-0.6903		5.0966	-0.0914	5.0966	-0.6903		5.0966	-0.0914	4.7997	-0.6903
	5.1069	-0.0636	5.4038	-0.7738		5.1069	-0.0636	5.1069	-0.7738		5.1069	-0.0636	4.8099	-0.7738
	5.1171	-0.0104	5.4141	-0.8558		5.1171	-0.0104	5.1171	-0.8558		5.1171	-0.0104	4.8202	-0.8558
	5.1274	0.0198	5.4243	-0.9042		5.1274	0.0198	5.1274	-0.9042		5.1274	0.0198	4.8304	-0.9042
	5.1376	0.0554	5.4346	-0.9322		5.1376	0.0554	5.1376	-0.9322		5.1376	0.0554	4.8406	-0.9322
	5.1478	0.0961	5.4448	-0.9947		5.1478	0.0961	5.1478	-0.9947		5.1478	0.0961	4.8509	-0.9947
	5.1581	0.1376	5.455	-1.1115		5.1581	0.1376	5.1581	-1.1115		5.1581	0.1376	4.8611	-1.1115
	5.1683	0.2118	5.4653	-1.2167		5.1683	0.2118	5.1683	-1.2167		5.1683	0.2118	4.8714	-1.2167
	5.1786	0.2591	5.4755	-1.3417		5.1786	0.2591	5.1786	-1.3417		5.1786	0.2591	4.8816	-1.3417
	5.1888	0.312	5.4858	-1.4791		5.1888	0.312	5.1888	-1.4791		5.1888	0.312	4.8918	-1.4791
	5.199	0.37	5.496	-1.6275		5.199	0.37	5.199	-1.6275		5.199	0.37	4.9021	-1.6275
	5.2093	0.4577	5.5062	-1.7551		5.2093	0.4577	5.2093	-1.7551		5.2093	0.4577	4.9123	-1.7551
	5.2195	0.5456	5.5165	-1.8333		5.2195	0.5456	5.2195	-1.8333		5.2195	0.5456	4.9226	-1.8333
	5.2298	0.6373	5.5267	-1.9412		5.2298	0.6373	5.2298	-1.9412		5.2298	0.6373	4.9328	-1.9412
	5.24	0.7542	5.537	-2.0777		5.24	0.7542	5.24	-2.0777		5.24	0.7542	4.943	-2.0777
	5.2502	0.86	5.5472	-2.2228		5.2502	0.86	5.2502	-2.2228		5.2502	0.86	4.9533	-2.2228
	5.2605	0.9911	5.5574	-2.3716		5.2605	0.9911	5.2605	-2.3716		5.2605	0.9911	4.9635	-2.3716
	5.2707	1.1067	5.5677	-2.5187		5.2707	1.1067	5.2707	-2.5187		5.2707	1.1067	4.9738	-2.5187
	5.281	1.208	5.5779	-2.6347		5.281	1.208	5.281	-2.6347		5.281	1.208	4.984	-2.6347
	5.2912	1.283	5.5882	-2.746		5.2912	1.283	5.2912	-2.746		5.2912	1.283	4.9942	-2.746
	5.3014	1.4233	5.5984	-2.8448		5.3014	1.4233	5.3014	-2.8448		5.3014	1.4233	5.0045	-2.8448
	5.3117	1.5612	5.6086	-2.9526		5.3117	1.5612	5.3117	-2.9526		5.3117	1.5612	5.0147	-2.9526
	5.3219	1.7141	5.6189	-3.101		5.3219	1.7141	5.3219	-3.101		5.3219	1.7141	5.025	-3.101
	5.3322	1.8765	5.6291	-3.2902		5.3322	1.8765	5.3322	-3.2902		5.3322	1.8765	5.0352	-3.2902
	5.3424	2.0364	5.6394	-3.4649		5.3424	2.0364	5.3424	-3.4649		5.3424	2.0364	5.0454	-3.4649
	5.3526	2.2222	5.6496	-3.6187		5.3526	2.2222	5.3526	-3.6187		5.3526	2.2222	5.0557	-3.6187
	5.3629	2.3937	5.6598	-3.7794		5.3629	2.3937	5.3629	-3.7794		5.3629	2.3937	5.0659	-3.7794
	5.3731	2.5649	5.6701	-3.8807		5.3731	2.5649	5.3731	-3.8807		5.3731	2.5649	5.0762	-3.8807
	5.3834	2.7674	5.6803	-4.0033		5.3834	2.7674	5.3834	-4.0033		5.3834	2.7674	5.0864	-4.0033
	5.3936	2.9702	5.6906	-4.1243		5.3936	2.9702	5.3936	-4.1243		5.3936	2.9702	5.0966	-4.1243
	5.4038	3.1915	5.7008	-4.2409		5.4038	3.1915	5.4038	-4.2409		5.4038	3.1915	5.1069	-4.2409
	5.4141	3.3831	5.711	-4.3301		5.4141	3.3831	5.4141	-4.3301		5.4141	3.3831	5.1171	-4.3301
	5.4243	3.6164	5.7213	-4.4305		5.4243	3.6164	5.4243	-4.4305		5.4243	3.6164	5.1274	-4.4305
	5.4346	3.8413	5.7315	-4.5426		5.4346	3.8413	5.4346	-4.5426		5.4346	3.8413	5.1376	-4.5426
	5.4448	4.0676	5.7418	-4.6467		5.4448	4.0676	5.4448	-4.6467		5.4448	4.0676	5.1478	-4.6467
	5.455	4.3227	5.752	-4.7562		5.455	4.3227	5.455	-4.7562		5.455	4.3227	5.1581	-4.7562
	5.4653	4.5735	5.7622	-4.874		5.4653	4.5735	5.4653	-4.874		5.4653	4.5735	5.1683	-4.874
	5.4755	4.8188	5.7725	-4.9828		5.4755	4.8188	5.4755	-4.9828		5.4755	4.8188	5.1786	-4.9828
	5.4858	5.0514	5.7827	-5.0726		5.4858	5.0514	5.4858	-5.0726		5.4858	5.0514	5.1888	-5.0726
	5.496	5.2946	5.793	-5.1621		5.496	5.2946	5.496	-5.1621		5.496	5.2946	5.199	-5.1621
	5.5062	5.5494	5.8032	-5.2624		5.5062	5.5494	5.5062	-5.2624		5.5062	5.5494	5.2093	-5.2624
	5.5165	5.8125	5.8134	-5.3556		5.5165	5.8125	5.5165	-5.3556		5.5165	5.8125	5.2195	-5.3556
	5.5267	6.0891	5.8237	-5.4081		5.5267	6.0891	5.5267	-5.4081		5.5267	6.0891	5.2298	-5.4081
	5.537	6.3726	5.8339	-5.4629		5.537	6.3726	5.537	-5.4629		5.537	6.3726	5.24	-5.4629
	5.5472	6.6719	5.8442	-5.5433		5.5472	6.6719	5.5472	-5.5433		5.5472	6.6719	5.2502	-5.5433
	5.5574	6.9581	5.8544	-5.643		5.5574	6.9581	5.5574	-5.643		5.5574	6.9581	5.2605	-5.643
	5.5677	7.293	5.8646	-5.7254		5.5677	7.293	5.5677	-5.7254		5.5677	7.293	5.2707	-5.7254
	5.5779	7.6651	5.8749	-5.7461		5.5779	7.6651	5.5779	-5.7461		5.5779	7.6651	5.281	-5.7461
	5.5882	8.0518	5.8851	-5.7985		5.5882	8.0518	5.5882	-5.7985		5.5882	8.0518	5.2912	-5.7985
	5.5984	8.4819	5.8954	-5.8278		5.5984	8.4819	5.5984	-5.8278		5.5984	8.4819	5.3014	-5.8278
	5.6086	8.9098	5.9056	-5.8883		5.6086	8.9098	5.6086	-5.8883		5.6086	8.9098	5.3117	-5.8883
	5.6189	9.3709	5.9158	-5.9517		5.6189	9.3709	5.6189	-5.9517		5.6189	9.3709	5.3219	-5.9517
	5.6291	9.8251	5.9261	-6.0139		5.6291	9.8251	5.6291	-6.0139		5.6291	9.8251	5.3322	-6.0139
	5.6394	10.3256	5.9363	-6.0722		5.6394	10.3256	5.6394	-6.0722		5.6394	10.3256	5.3424	-6.0722
	5.6496	10.8402	5.9466	-6.075		5.6496	10.8402	5.6496	-6.075		5.6496	10.8402	5.3526	-6.075
	5.6598	11.3424	5.9568	-6.1007		5.6598	11.3424	5.6598	-6.1007		5.6598	11.3424	5.3629	-6.1007
	5.6701	11.8672	5.967	-6.1198		5.6701	11.8672	5.6701	-6.1198		5.6701	11.8672	5.3731	-6.1198
	5.6803	12.4006	5.9773	-6.1342		5.6803	12.4006	5.6803	-6.1342		5.6803	12.4006	5.3834	-6.1342
	5.6906	12.9491	5.9875	-6.171		5.6906	12.9491	5.6906	-6.171		5.6906	12.9491	5.3936	-6.171
	5.7008	13.4989	5.9978	-6.1742		5.7008	13.4989	5.7008	-6.1742		5.7008	13.4989	5.4038	-6.1742
	5.711	14.0325	6.008	-6.1565		5.711	14.0325	5.711	-6.1565		5.711	14.0325	5.4141	-6.1565
	5.7213	14.5507	6.0182	-6.1591		5.7213	14.5507	5.7213	-6.1591		5.7213	14.5507	5.4243	-6.1591
	5.7315	15.0273	6.0285	-6.1695		5.7315	15.0273	5.7315	-6.1695		5.7315	15.0273	5.4346	-6.1695
	5.7418	15.4748	6.0387	-6.1911		5.7418	15.4748	5.7418	-6.1911		5.7418	15.4748	5.4448	-6.1911
	5.752	15.9391	6.049	-6.2255		5.752	15.9391	5.752	-6.2255		5.752	15.9391	5.455	-6.2255
	5.7622	16.3602	6.0592	-6.2881		5.7622	16.3602	5.7622	-6.2881		5.7622	16.3602	5.4653	-6.2881
	5.7725	16.7555	6.0694	-6.2987		5.7725	16.7555	5.7725	-6.2987		5.7725	16.7555	5.4755	-6.2987
	5.7827	17.1395	6.0797	-6.3055		5.7827	17.1395	5.7827	-6.3055		5.7827	17.1395	5.4858	-6.3055
	5.793	17.5072	6.0899	-6.3152		5.793	17.5072	5.793	-6.3152		5.793	17.5072	5.496	-6.3152
	5.8032	17.8447	6.1002	-6.2959		5.8032	17.8447	5.8032	-6.2959		5.8032	17.8447	5.5062	-6.2959
	5.8134	18.1337	6.1104	-6.2823		5.8134	18.1337	5.8134	-6.2823		5.8134	18.1337	5.5165	-6.2823
	5.8237	18.3824	6.1206	-6.28		5.8237	18.3824	5.8237	-6.28		5.8237	18.3824	5.5267	-6.28
	5.8339	18.5598	6.1309	-6.2676		5.8339	18.5598	5.8339	-6.2676		5.8339	18.5598	5.537	-6.2676
	5.8442	18.7184	6.1411	-6.2523		5.8442	18.7184	5.8442	-6.2523		5.8442	18.7184	5.5472	-6.2523
	5.8544	18.8585	6.1514	-6.2303		5.8544	18.8585	5.8544	-6.2303		5.8544	18.8585	5.5574	-6.2303
	5.8646	18.9124	6.1616	-6.1936		5.8646	18.9124	5.8646	-6.1936		5.8646	18.9124	5.5677	-6.1936
	5.8749	18.895	6.1718	-6.1668		5.8749	18.895	5.8749	-6.1668		5.8749	18.895	5.5779	-6.1668
	5.8851	18.8107	6.1821	-6.1535		5.8851	18.8107	5.8851	-6.1535		5.8851	18.8107	5.5882	-6.1535
	5.8954	18.7099	6.1923	-6.1213		5.8954	18.7099	5.8954	-6.1213		5.8954	18.7099	5.5984	-6.1213
	5.9056	18.5514	6.2026	-6.1046		5.9056	18.5514	5.9056	-6.1046		5.9056	18.5514	5.6086	-6.1046
	5.9158	18.3523	6.2128	-6.0661		5.9158	18.3523	5.9158	-6.0661		5.9158	18.3523	5.6189	-6.0661
	5.9261	18.0811	6.223	-6.031		5.9261	18.0811	5.9261	-6.031		5.9261	18.0811	5.6291	-6.031
	5.9363	17.7787	6.2333	-6.0093		5.9363	17.7787	5.9363	-6.0093		5.9363	17.7787	5.6394	-6.0093
	5.9466	17.4573	6.2435	-6.0062		5.9466	17.4573	5.9466	-6.0062		5.9466	17.4573	5.6496	-6.0062
	5.9568	17.1025	6.2538	-5.9818		5.9568	17.1025	5.9568	-5.9818		5.9568	17.1025	5.6598	-5.9818
	5.967	16.6946	6.264	-5.9547		5.967	16.6946	5.967	-5.9547		5.967	16.6946	5.6701	-5.9547
	5.9773	16.2346	6.2742	-5.9363		5.9773	16.2346	5.9773	-5.9363		5.9773	16.2346	5.6803	-5.9363
	5.9875	15.7974	6.2845	-5.9231		5.9875	15.7974	5.9875	-5.9231		5.9875	15.7974	5.6906	-5.9231
	5.9978	15.3207	6.2947	-5.8849		5.9978	15.3207	5.9978	-5.8849		5.9978	15.3207	5.7008	-5.8849
	6.008	14.8081	6.305	-5.8294		6.008	14.8081	6.008	-5.8294		6.008	14.8081	5.711	-5.8294
	6.0182	14.27	6.3152	-5.8377		6.0182	14.27	6.0182	-5.8377		6.0182	14.27	5.7213	-5.8377
	6.0285	13.7563	6.3254	-5.8083		6.0285	13.7563	6.0285	-5.8083		6.0285	13.7563	5.7315	-5.8083
	6.0387	13.2406	6.3357	-5.7976		6.0387	13.2406	6.0387	-5.7976		6.0387	13.2406	5.7418	-5.7976
	6.049	12.7177	6.3459	-5.7551		6.049	12.7177	6.049	-5.7551		6.049	12.7177	5.752	-5.7551
	6.0592	12.2071	6.3562	-5.6864		6.0592	12.2071	6.0592	-5.6864		6.0592	12.2071	5.7622	-5.6864
	6.0694	11.6712	6.3664	-5.6327		6.0694	11.6712	6.0694	-5.6327		6.0694	11.6712	5.7725	-5.6327
	6.0797	11.1456	6.3766	-5.563		6.0797	11.1456	6.0797	-5.563		6.0797	11.1456	5.7827	-5.563
	6.0899	10.6117	6.3869	-5.5701		6.0899	10.6117	6.0899	-5.5701		6.0899	10.6117	5.793	-5.5701
	6.1002	10.1065	6.3971	-5.5643		6.1002	10.1065	6.1002	-5.5643		6.1002	10.1065	5.8032	-5.5643
	6.1104	9.5906	6.4074	-5.5356		6.1104	9.5906	6.1104	-5.5356		6.1104	9.5906	5.8134	-5.5356
	6.1206	9.0784	6.4176	-5.4921		6.1206	9.0784	6.1206	-5.4921		6.1206	9.0784	5.8237	-5.4921
	6.1309	8.6079	6.4278	-5.4519		6.1309	8.6079	6.1309	-5.4519		6.1309	8.6079	5.8339	-5.4519
	6.1411	8.1369	6.4381	-5.4173		6.1411	8.1369	6.1411	-5.4173		6.1411	8.1369	5.8442	-5.4173
	6.1514	7.6895	6.4483	-5.3667		6.1514	7.6895	6.1514	-5.3667		6.1514	7.6895	5.8544	-5.3667
	6.1616	7.2713	6.4586	-5.2758		6.1616	7.2713	6.1616	-5.2758		6.1616	7.2713	5.8646	-5.2758
	6.1718	6.8493	6.4688	-5.2233		6.1718	6.8493	6.1718	-5.2233		6.1718	6.8493	5.8749	-5.2233
	6.1821	6.4498	6.479	-5.1895		6.1821	6.4498	6.1821	-5.1895		6.1821	6.4498	5.8851	-5.1895
	6.1923	6.0623	6.4893	-5.1254		6.1923	6.0623	6.1923	-5.1254		6.1923	6.0623	5.8954	-5.1254
	6.2026	5.6673	6.4995	-5.0642		6.2026	5.6673	6.2026	-5.0642		6.2026	5.6673	5.9056	-5.0642
	6.2128	5.2857	6.5098	-5.025		6.2128	5.2857	6.2128	-5.025		6.2128	5.2857	5.9158	-5.025
	6.223	4.9238	6.52	-4.9853		6.223	4.9238	6.223	-4.9853		6.223	4.9238	5.9261	-4.9853
	6.2333	4.5861	6.5302	-4.9282		6.2333	4.5861	6.2333	-4.9282		6.2333	4.5861	5.9363	-4.9282
	6.2435	4.2606	6.5405	-4.8728		6.2435	4.2606	6.2435	-4.8728		6.2435	4.2606	5.9466	-4.8728
	6.2538	3.96	6.5507	-4.8501		6.2538	3.96	6.2538	-4.8501		6.2538	3.96	5.9568	-4.8501
	6.264	3.6267	6.561	-4.8189		6.264	3.6267	6.264	-4.8189		6.264	3.6267	5.967	-4.8189
	6.2742	3.3291	6.5712	-4.7676		6.2742	3.3291	6.2742	-4.7676		6.2742	3.3291	5.9773	-4.7676
	6.2845	3.0733	6.5814	-4.7193		6.2845	3.0733	6.2845	-4.7193		6.2845	3.0733	5.9875	-4.7193
	6.2947	2.8183	6.5917	-4.6774		6.2947	2.8183	6.2947	-4.6774		6.2947	2.8183	5.9978	-4.6774
	6.305	2.557	6.6019	-4.6261		6.305	2.557	6.305	-4.6261		6.305	2.557	6.008	-4.6261
	6.3152	2.3023	6.6122	-4.584		6.3152	2.3023	6.3152	-4.584		6.3152	2.3023	6.0182	-4.584
	6.3254	2.0814	6.6224	-4.5774		6.3254	2.0814	6.3254	-4.5774		6.3254	2.0814	6.0285	-4.5774
	6.3357	1.8417	6.6326	-4.556		6.3357	1.8417	6.3357	-4.556		6.3357	1.8417	6.0387	-4.556
	6.3459	1.6	6.6429	-4.4855		6.3459	1.6	6.3459	-4.4855		6.3459	1.6	6.049	-4.4855
	6.3562	1.3767	6.6531	-4.4125		6.3562	1.3767	6.3562	-4.4125		6.3562	1.3767	6.0592	-4.4125
	6.3664	1.1731	6.6634	-4.3715		6.3664	1.1731	6.3664	-4.3715		6.3664	1.1731	6.0694	-4.3715
	6.3766	0.9889	6.6736	-4.3315		6.3766	0.9889	6.3766	-4.3315		6.3766	0.9889	6.0797	-4.3315
	6.3869	0.7968	6.6838	-4.3043		6.3869	0.7968	6.3869	-4.3043		6.3869	0.7968	6.0899	-4.3043
	6.3971	0.5942	6.6941	-4.318		6.3971	0.5942	6.3971	-4.318		6.3971	0.5942	6.1002	-4.318
	6.4074	0.4212	6.7043	-4.2996		6.4074	0.4212	6.4074	-4.2996		6.4074	0.4212	6.1104	-4.2996
	6.4176	0.2526	6.7146	-4.2584		6.4176	0.2526	6.4176	-4.2584		6.4176	0.2526	6.1206	-4.2584
	6.4278	0.0745	6.7248	-4.1995		6.4278	0.0745	6.4278	-4.1995		6.4278	0.0745	6.1309	-4.1995
	6.4381	-0.0811	6.735	-4.1577		6.4381	-0.0811	6.4381	-4.1577		6.4381	-0.0811	6.1411	-4.1577
	6.4483	-0.2376	6.7453	-4.1419		6.4483	-0.2376	6.4483	-4.1419		6.4483	-0.2376	6.1514	-4.1419
	6.4586	-0.3839	6.7555	-4.1124		6.4586	-0.3839	6.4586	-4.1124		6.4586	-0.3839	6.1616	-4.1124
	6.4688	-0.5193	6.7658	-4.0758		6.4688	-0.5193	6.4688	-4.0758		6.4688	-0.5193	6.1718	-4.0758
	6.479	-0.6591	6.776	-3.9964		6.479	-0.6591	6.479	-3.9964		6.479	-0.6591	6.1821	-3.9964
	6.4893	-0.7735	6.7862	-3.959		6.4893	-0.7735	6.4893	-3.959		6.4893	-0.7735	6.1923	-3.959
	6.4995	-0.9044	6.7965	-3.9048		6.4995	-0.9044	6.4995	-3.9048		6.4995	-0.9044	6.2026	-3.9048
	6.5098	-1.0291	6.8067	-3.8682		6.5098	-1.0291	6.5098	-3.8682		6.5098	-1.0291	6.2128	-3.8682
	6.52	-1.1499	6.817	-3.859		6.52	-1.1499	6.52	-3.859		6.52	-1.1499	6.223	-3.859
	6.5302	-1.2723	6.8272	-3.8411		6.5302	-1.2723	6.5302	-3.8411		6.5302	-1.2723	6.2333	-3.8411
	6.5405	-1.3663	6.8374	-3.8429		6.5405	-1.3663	6.5405	-3.8429		6.5405	-1.3663	6.2435	-3.8429
	6.5507	-1.4714	6.8477	-3.8391		6.5507	-1.4714	6.5507	-3.8391		6.5507	-1.4714	6.2538	-3.8391
	6.561	-1.574	6.8579	-3.8187		6.561	-1.574	6.561	-3.8187		6.561	-1.574	6.264	-3.8187
	6.5712	-1.6642	6.8682	-3.7748		6.5712	-1.6642	6.5712	-3.7748		6.5712	-1.6642	6.2742	-3.7748
	6.5814	-1.746	6.8784	-3.7203		6.5814	-1.746	6.5814	-3.7203		6.5814	-1.746	6.2845	-3.7203
	6.5917	-1.8381	6.8886	-3.6442		6.5917	-1.8381	6.5917	-3.6442		6.5917	-1.8381	6.2947	-3.6442
	6.6019	-1.9203	6.8989	-3.6066		6.6019	-1.9203	6.6019	-3.6066		6.6019	-1.9203	6.305	-3.6066
	6.6122	-1.9838	6.9091	-3.609		6.6122	-1.9838	6.6122	-3.609		6.6122	-1.9838	6.3152	-3.609
	6.6224	-2.0439	6.9194	-3.5861		6.6224	-2.0439	6.6224	-3.5861		6.6224	-2.0439	6.3254	-3.5861
	6.6326	-2.1262	6.9296	-3.5761		6.6326	-2.1262	6.6326	-3.5761		6.6326	-2.1262	6.3357	-3.5761
	6.6429	-2.19	6.9398	-3.5483		6.6429	-2.19	6.6429	-3.5483		6.6429	-2.19	6.3459	-3.5483
	6.6531	-2.2232	6.9501	-3.5191		6.6531	-2.2232	6.6531	-3.5191		6.6531	-2.2232	6.3562	-3.5191
	6.6634	-2.2872	6.9603	-3.4676		6.6634	-2.2872	6.6634	-3.4676		6.6634	-2.2872	6.3664	-3.4676
	6.6736	-2.3637	6.9706	-3.3971		6.6736	-2.3637	6.6736	-3.3971		6.6736	-2.3637	6.3766	-3.3971
	6.6838	-2.4427	6.9808	-3.3469		6.6838	-2.4427	6.6838	-3.3469		6.6838	-2.4427	6.3869	-3.3469
	6.6941	-2.4669	6.991	-3.3088		6.6941	-2.4669	6.6941	-3.3088		6.6941	-2.4669	6.3971	-3.3088
	6.7043	-2.476	7.0013	-3.269		6.7043	-2.476	6.7043	-3.269		6.7043	-2.476	6.4074	-3.269
	6.7146	-2.5059	7.0115	-3.2398		6.7146	-2.5059	6.7146	-3.2398		6.7146	-2.5059	6.4176	-3.2398
	6.7248	-2.5735	7.0218	-3.2268		6.7248	-2.5735	6.7248	-3.2268		6.7248	-2.5735	6.4278	-3.2268
	6.735	-2.6263	7.032	-3.1998		6.735	-2.6263	6.735	-3.1998		6.735	-2.6263	6.4381	-3.1998
	6.7453	-2.657	7.0422	-3.185		6.7453	-2.657	6.7453	-3.185		6.7453	-2.657	6.4483	-3.185
	6.7555	-2.6984	7.0525	-3.1237		6.7555	-2.6984	6.7555	-3.1237		6.7555	-2.6984	6.4586	-3.1237
	6.7658	-2.7271	7.0627	-3.0956		6.7658	-2.7271	6.7658	-3.0956		6.7658	-2.7271	6.4688	-3.0956
	6.776	-2.78	7.073	-3.0668		6.776	-2.78	6.776	-3.0668		6.776	-2.78	6.479	-3.0668
	6.7862	-2.8392	7.0832	-3.0437		6.7862	-2.8392	6.7862	-3.0437		6.7862	-2.8392	6.4893	-3.0437
	6.7965	-2.8654	7.0934	-3.0482		6.7965	-2.8654	6.7965	-3.0482		6.7965	-2.8654	6.4995	-3.0482
	6.8067	-2.8953	7.1037	-3.0104		6.8067	-2.8953	6.8067	-3.0104		6.8067	-2.8953	6.5098	-3.0104
	6.817	-2.9358	7.1139	-2.9482		6.817	-2.9358	6.817	-2.9482		6.817	-2.9358	6.52	-2.9482
	6.8272	-2.9769	7.1242	-2.9261		6.8272	-2.9769	6.8272	-2.9261		6.8272	-2.9769	6.5302	-2.9261
	6.8374	-3.0187	7.1344	-2.9328		6.8374	-3.0187	6.8374	-2.9328		6.8374	-3.0187	6.5405	-2.9328
	6.8477	-3.0252	7.1446	-2.91		6.8477	-3.0252	6.8477	-2.91		6.8477	-3.0252	6.5507	-2.91
	6.8579	-3.0254	7.1549	-2.8688		6.8579	-3.0254	6.8579	-2.8688		6.8579	-3.0254	6.561	-2.8688
	6.8682	-3.0594	7.1651	-2.8098		6.8682	-3.0594	6.8682	-2.8098		6.8682	-3.0594	6.5712	-2.8098
	6.8784	-3.0555	7.1754	-2.7584		6.8784	-3.0555	6.8784	-2.7584		6.8784	-3.0555	6.5814	-2.7584
	6.8886	-3.0352	7.1856	-2.6983		6.8886	-3.0352	6.8886	-2.6983		6.8886	-3.0352	6.5917	-2.6983
	6.8989	-3.0303	7.1958	-2.6685		6.8989	-3.0303	6.8989	-2.6685		6.8989	-3.0303	6.6019	-2.6685
	6.9091	-3.0701	7.2061	-2.6537		6.9091	-3.0701	6.9091	-2.6537		6.9091	-3.0701	6.6122	-2.6537
	6.9194	-3.0701	7.2163	-2.6353		6.9194	-3.0701	6.9194	-2.6353		6.9194	-3.0701	6.6224	-2.6353
	6.9296	-3.0672	7.2266	-2.5889		6.9296	-3.0672	6.9296	-2.5889		6.9296	-3.0672	6.6326	-2.5889
	6.9398	-3.0727	7.2368	-2.5739		6.9398	-3.0727	6.9398	-2.5739		6.9398	-3.0727	6.6429	-2.5739
	6.9501	-3.0883	7.247	-2.563		6.9501	-3.0883	6.9501	-2.563		6.9501	-3.0883	6.6531	-2.563
	6.9603	-3.0687	7.2573	-2.5422		6.9603	-3.0687	6.9603	-2.5422		6.9603	-3.0687	6.6634	-2.5422
	6.9706	-3.0731	7.2675	-2.545		6.9706	-3.0731	6.9706	-2.545		6.9706	-3.0731	6.6736	-2.545
	6.9808	-3.0618	7.2778	-2.5129		6.9808	-3.0618	6.9808	-2.5129		6.9808	-3.0618	6.6838	-2.5129
	6.991	-3.0276	7.288	-2.4564		6.991	-3.0276	6.991	-2.4564		6.991	-3.0276	6.6941	-2.4564
	7.0013	-3.0084	7.2982	-2.3654		7.0013	-3.0084	7.0013	-2.3654		7.0013	-3.0084	6.7043	-2.3654
	7.0115	-2.9951	7.3085	-2.3248		7.0115	-2.9951	7.0115	-2.3248		7.0115	-2.9951	6.7146	-2.3248
	7.0218	-2.9981	7.3187	-2.2852		7.0218	-2.9981	7.0218	-2.2852		7.0218	-2.9981	6.7248	-2.2852
	7.032	-2.9769	7.329	-2.2416		7.032	-2.9769	7.032	-2.2416		7.032	-2.9769	6.735	-2.2416
	7.0422	-2.9471	7.3392	-2.2291		7.0422	-2.9471	7.0422	-2.2291		7.0422	-2.9471	6.7453	-2.2291
	7.0525	-2.9378	7.3494	-2.2067		7.0525	-2.9378	7.0525	-2.2067		7.0525	-2.9378	6.7555	-2.2067
	7.0627	-2.9198	7.3597	-2.183		7.0627	-2.9198	7.0627	-2.183		7.0627	-2.9198	6.7658	-2.183
	7.073	-2.9099	7.3699	-2.1508		7.073	-2.9099	7.073	-2.1508		7.073	-2.9099	6.776	-2.1508
	7.0832	-2.9244	7.3802	-2.102		7.0832	-2.9244	7.0832	-2.102		7.0832	-2.9244	6.7862	-2.102
	7.0934	-2.9074	7.3904	-2.0782		7.0934	-2.9074	7.0934	-2.0782		7.0934	-2.9074	6.7965	-2.0782
	7.1037	-2.8938	7.4006	-2.0719		7.1037	-2.8938	7.1037	-2.0719		7.1037	-2.8938	6.8067	-2.0719
	7.1139	-2.8919	7.4109	-2.0561		7.1139	-2.8919	7.1139	-2.0561		7.1139	-2.8919	6.817	-2.0561
	7.1242	-2.8897	7.4211	-2.0289		7.1242	-2.8897	7.1242	-2.0289		7.1242	-2.8897	6.8272	-2.0289
	7.1344	-2.8879	7.4314	-1.9845		7.1344	-2.8879	7.1344	-1.9845		7.1344	-2.8879	6.8374	-1.9845
	7.1446	-2.8867	7.4416	-1.9525		7.1446	-2.8867	7.1446	-1.9525		7.1446	-2.8867	6.8477	-1.9525
	7.1549	-2.8725	7.4518	-1.9002		7.1549	-2.8725	7.1549	-1.9002		7.1549	-2.8725	6.8579	-1.9002
	7.1651	-2.8356	7.4621	-1.8581		7.1651	-2.8356	7.1651	-1.8581		7.1651	-2.8356	6.8682	-1.8581
	7.1754	-2.797	7.4723	-1.8258		7.1754	-2.797	7.1754	-1.8258		7.1754	-2.797	6.8784	-1.8258
	7.1856	-2.7657	7.4826	-1.7859		7.1856	-2.7657	7.1856	-1.7859		7.1856	-2.7657	6.8886	-1.7859
	7.1958	-2.7408	7.4928	-1.761		7.1958	-2.7408	7.1958	-1.761		7.1958	-2.7408	6.8989	-1.761
	7.2061	-2.7288	7.503	-1.7288		7.2061	-2.7288	7.2061	-1.7288		7.2061	-2.7288	6.9091	-1.7288
	7.2163	-2.7222	7.5133	-1.7029		7.2163	-2.7222	7.2163	-1.7029		7.2163	-2.7222	6.9194	-1.7029
	7.2266	-2.7174	7.5235	-1.6911		7.2266	-2.7174	7.2266	-1.6911		7.2266	-2.7174	6.9296	-1.6911
	7.2368	-2.7013	7.5338	-1.6292		7.2368	-2.7013	7.2368	-1.6292		7.2368	-2.7013	6.9398	-1.6292
	7.247	-2.6878	7.544	-1.5683		7.247	-2.6878	7.247	-1.5683		7.247	-2.6878	6.9501	-1.5683
	7.2573	-2.6988	7.5542	-1.5201		7.2573	-2.6988	7.2573	-1.5201		7.2573	-2.6988	6.9603	-1.5201
	7.2675	-2.6887	7.5645	-1.4597		7.2675	-2.6887	7.2675	-1.4597		7.2675	-2.6887	6.9706	-1.4597
	7.2778	-2.6553	7.5747	-1.4437		7.2778	-2.6553	7.2778	-1.4437		7.2778	-2.6553	6.9808	-1.4437
	7.288	-2.6576	7.585	-1.4298		7.288	-2.6576	7.288	-1.4298		7.288	-2.6576	6.991	-1.4298
	7.2982	-2.6231	7.5952	-1.4439		7.2982	-2.6231	7.2982	-1.4439		7.2982	-2.6231	7.0013	-1.4439
	7.3085	-2.5986	7.6054	-1.4305		7.3085	-2.5986	7.3085	-1.4305		7.3085	-2.5986	7.0115	-1.4305
	7.3187	-2.5982	7.6157	-1.3919		7.3187	-2.5982	7.3187	-1.3919		7.3187	-2.5982	7.0218	-1.3919
	7.329	-2.6006	7.6259	-1.3619		7.329	-2.6006	7.329	-1.3619		7.329	-2.6006	7.032	-1.3619
	7.3392	-2.5741	7.6362	-1.3441		7.3392	-2.5741	7.3392	-1.3441		7.3392	-2.5741	7.0422	-1.3441
[truncated: 260 more rows]

## Sheet: panel J
	left panel					middle panel					right panel
[truncated: 687 more rows]

## Sheet: panel K
	The figure is generated using the MATLAB function patch to plot filled polygons with the following x and y coordinates, and coloring each polygon according to the spike rate (see colorbar)
[truncated: 2,316 more rows]

[truncated: 1 more sheets: panel L]
