# Supplementary figures and images for: Glycinergic axonal inhibition subserves acute spatial sensitivity to sudden increases in sound intensity
Source: eLife journal article supplement (doi:10.7554/elife.62183), 2021-06-14

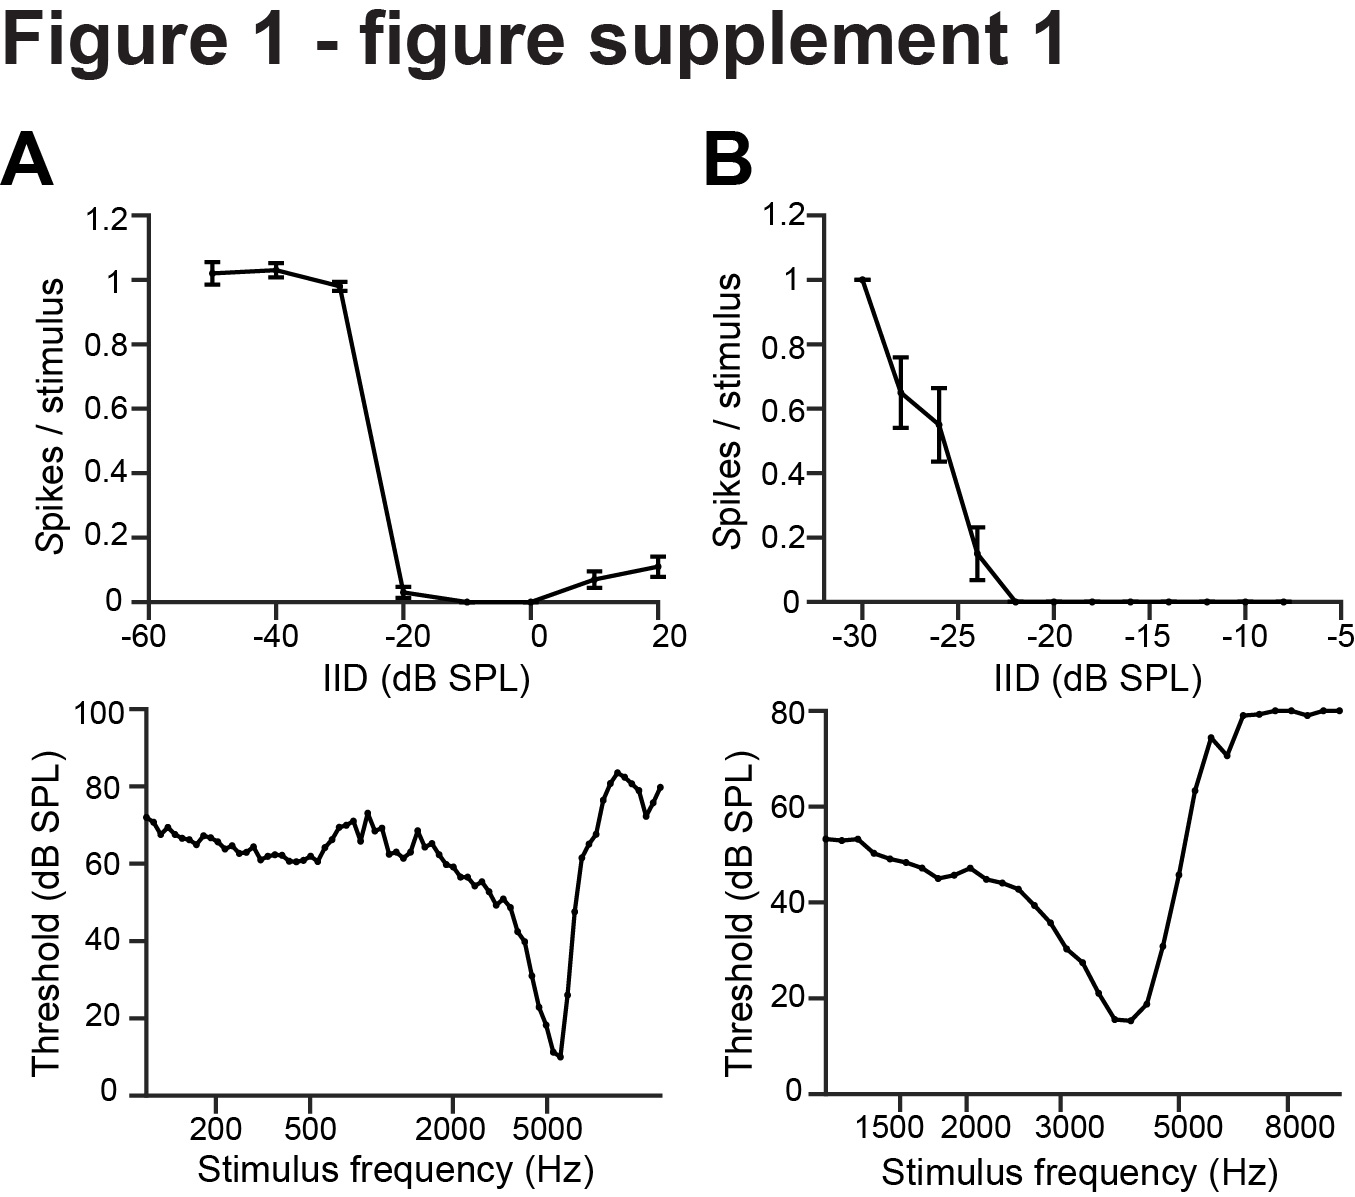

Supplement: supp [file elife-62183-supp-v1.zip › elife_poa_e62183_Figure_1_figure_supplement_1.jpg]

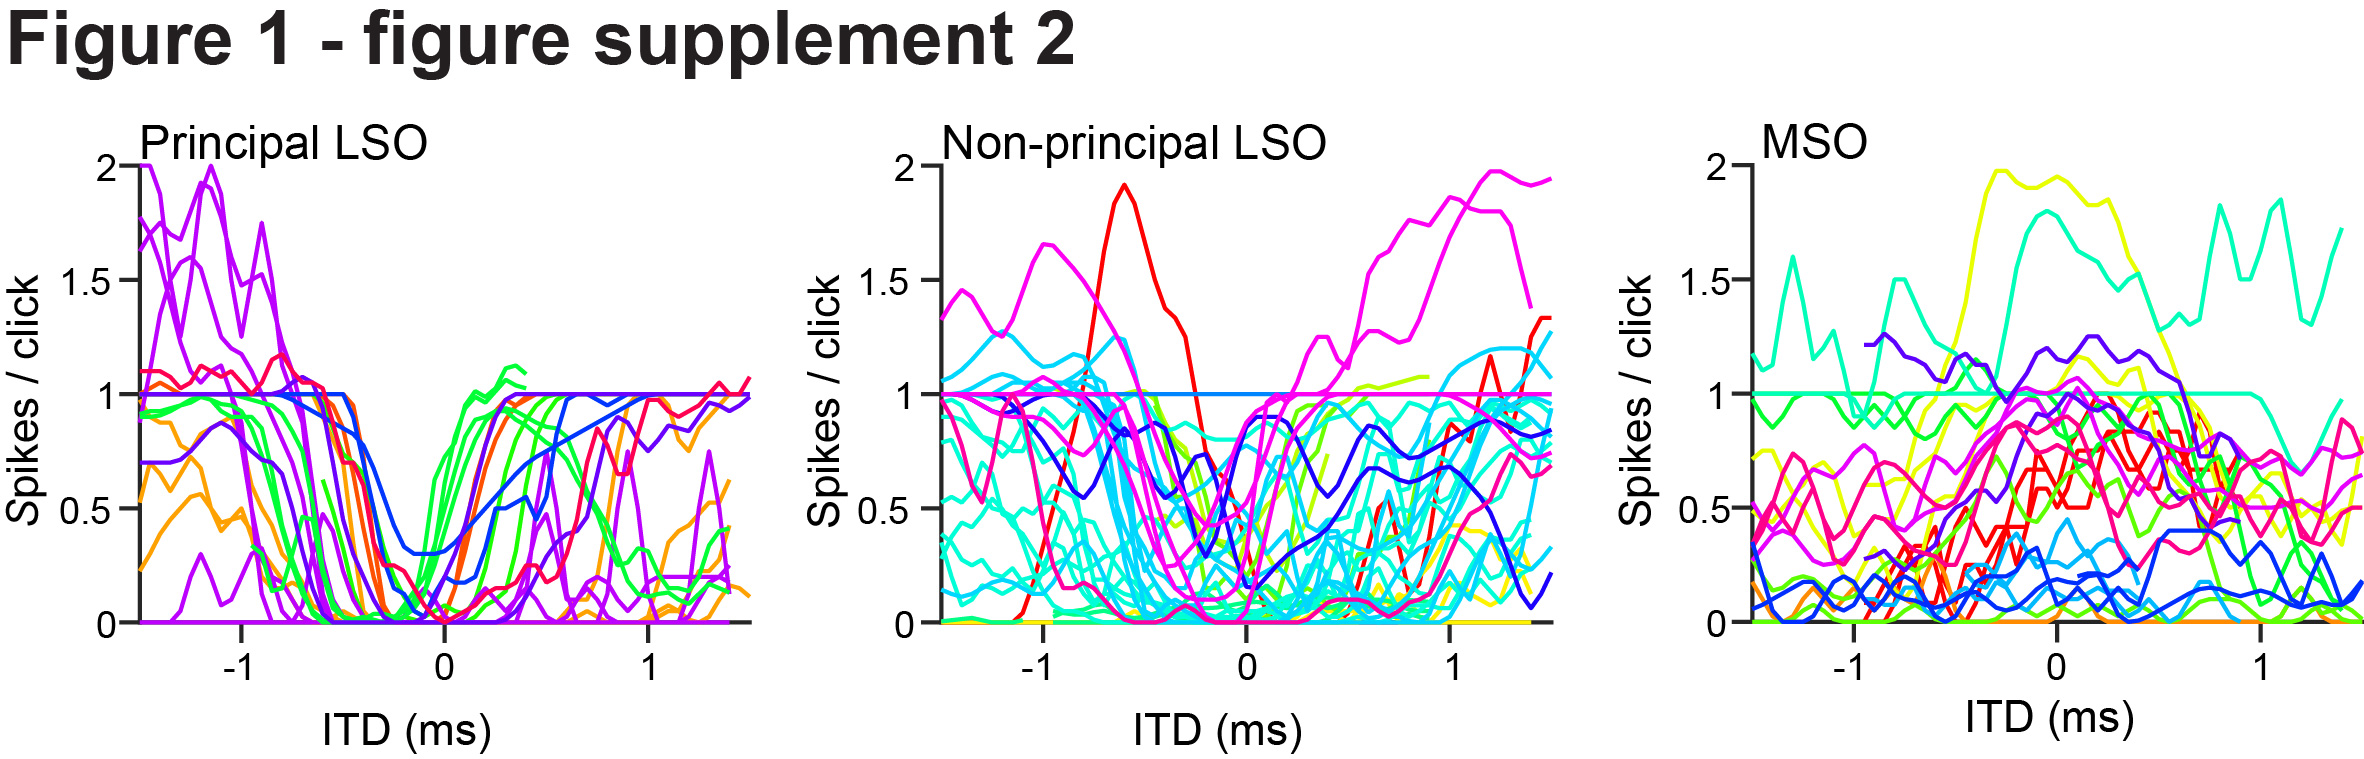

Supplement: supp [file elife-62183-supp-v1.zip › elife_poa_e62183_Figure_1_figure_supplement_2.jpg]

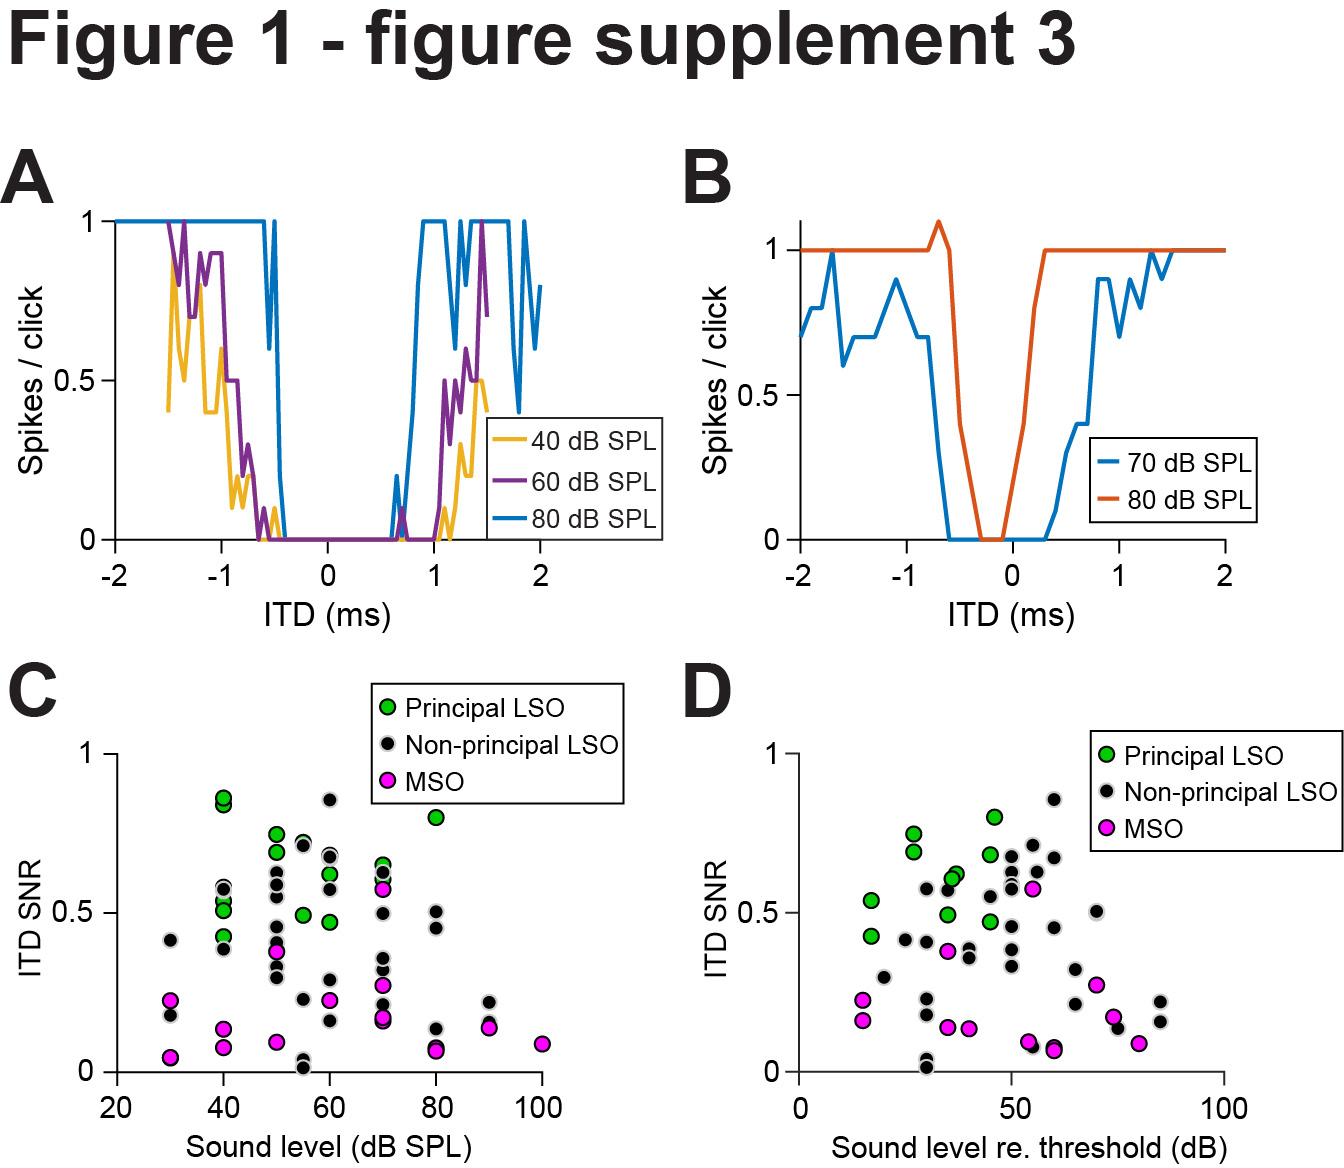

Supplement: supp [file elife-62183-supp-v1.zip › elife_poa_e62183_Figure_1_figure_supplement_3.jpg]

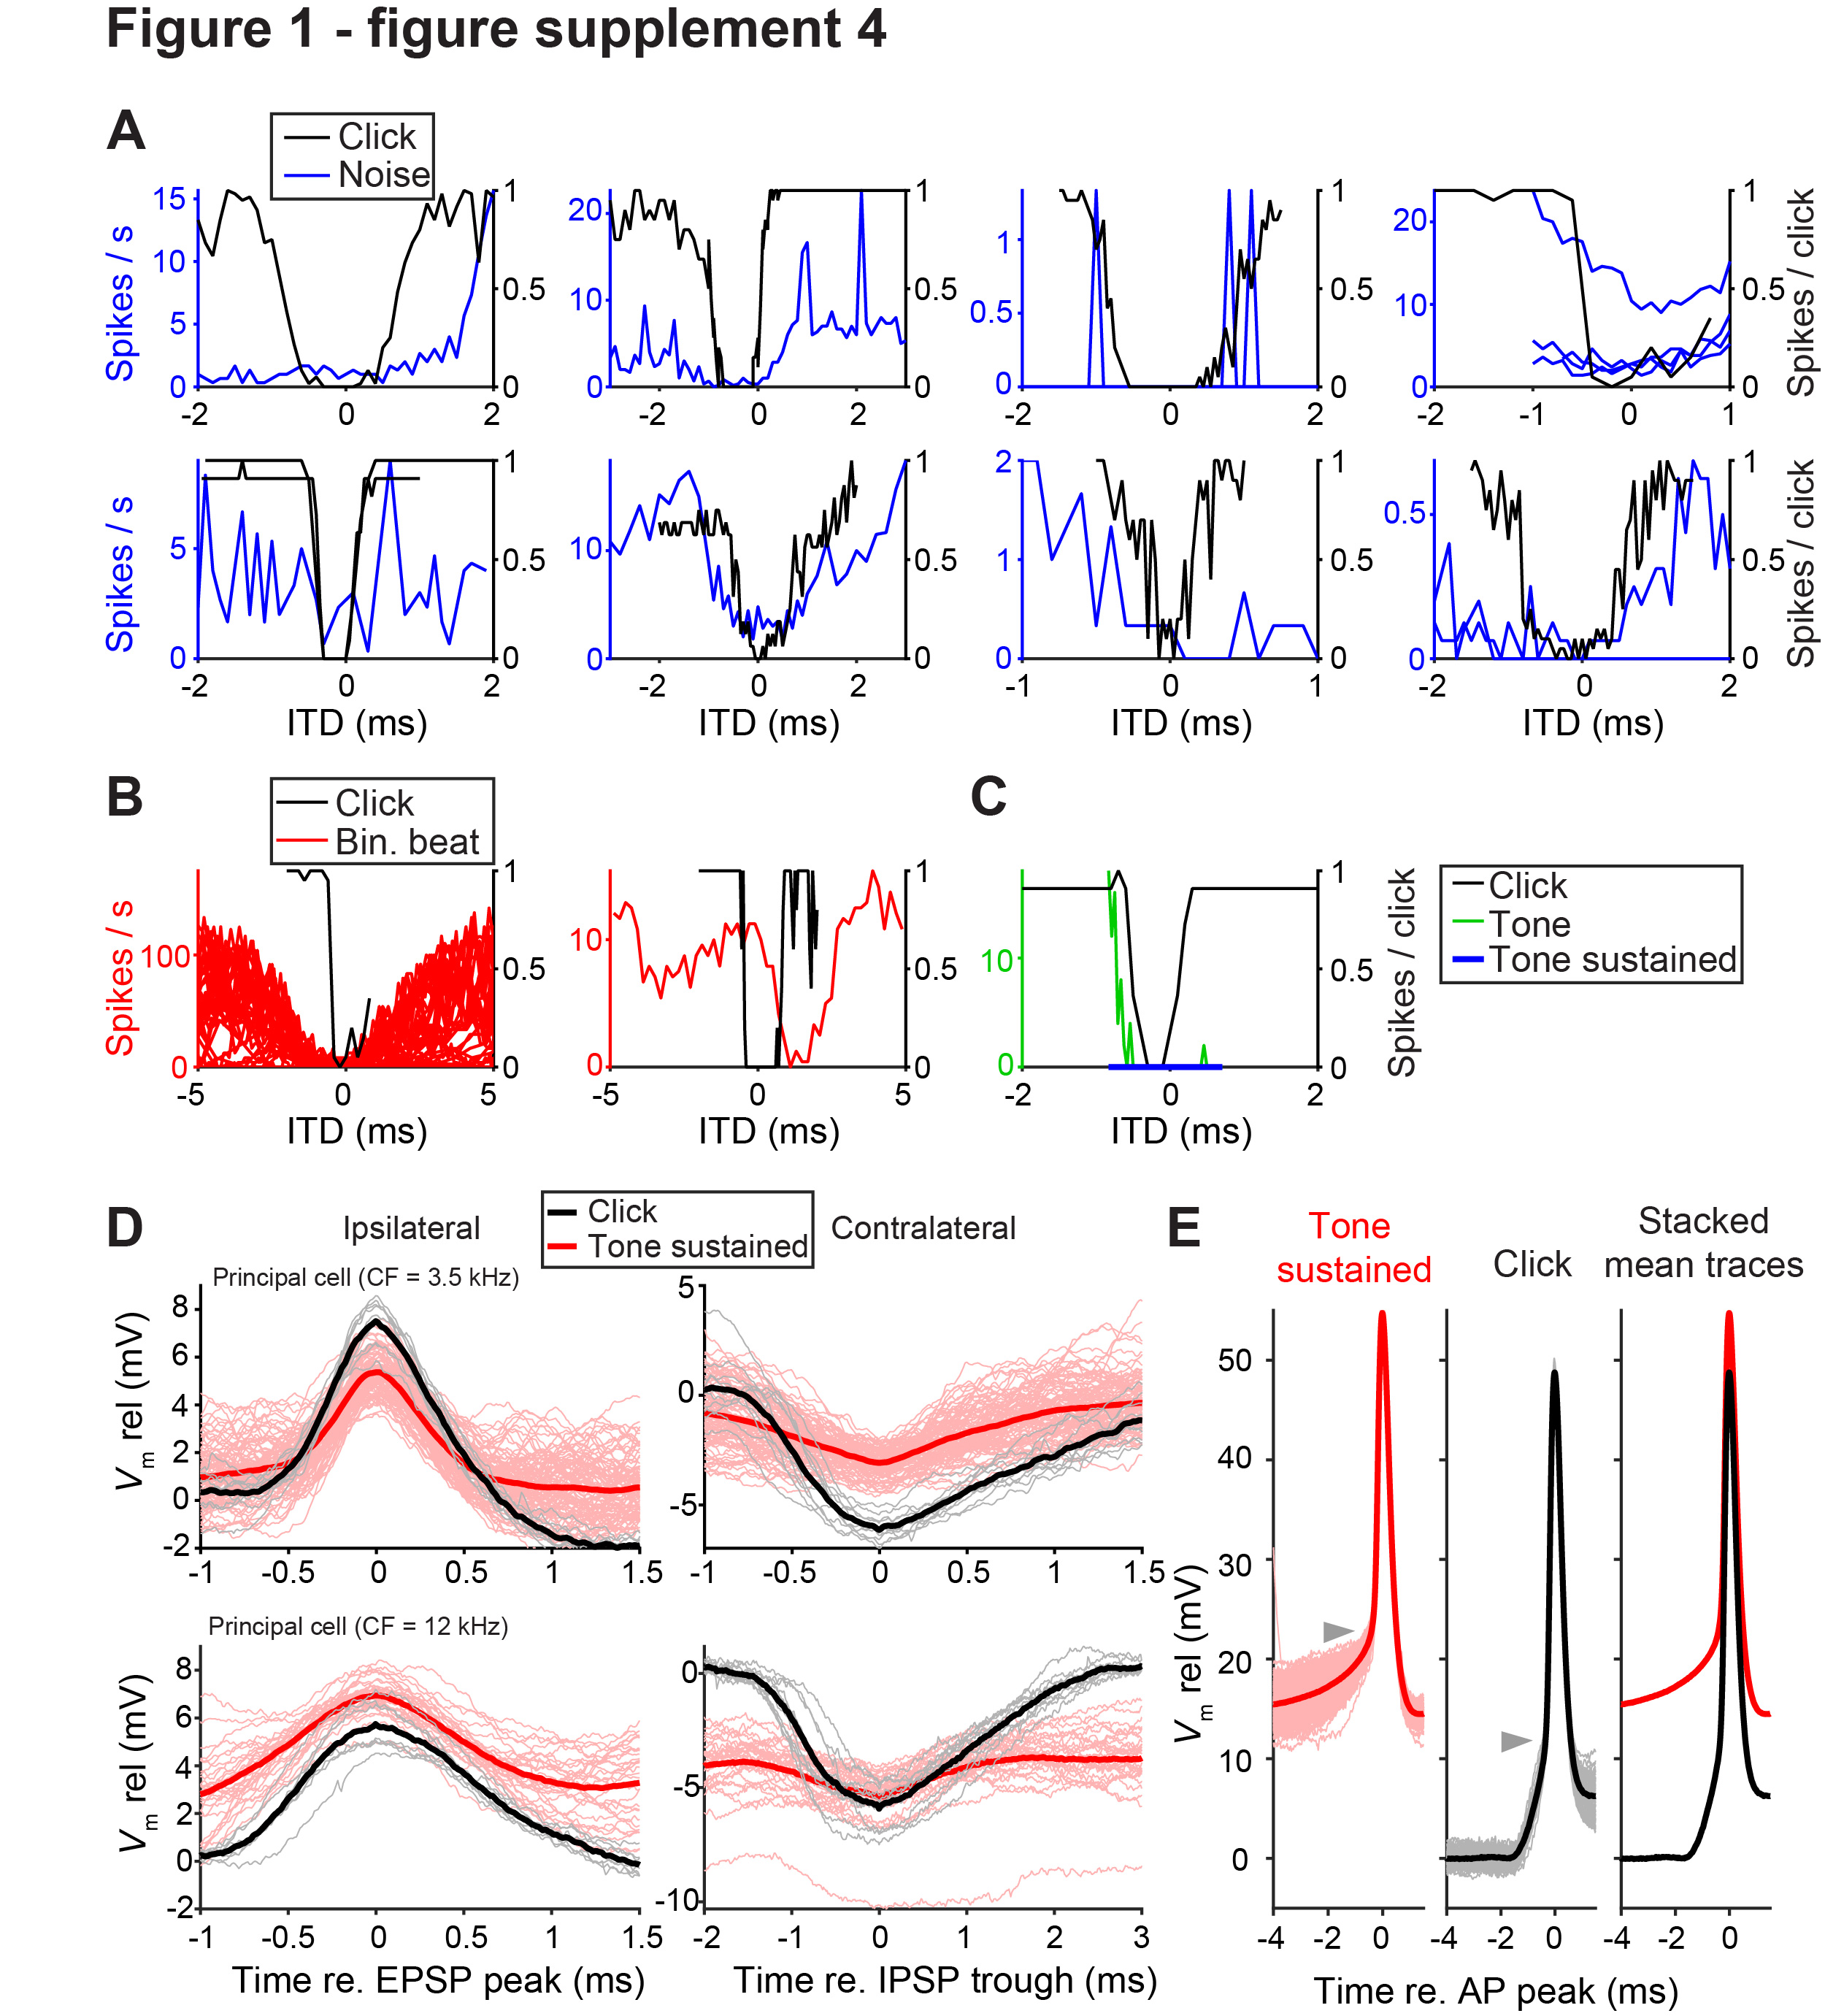

Supplement: supp [file elife-62183-supp-v1.zip › elife_poa_e62183_Figure_1_figure_supplement_4.jpg]

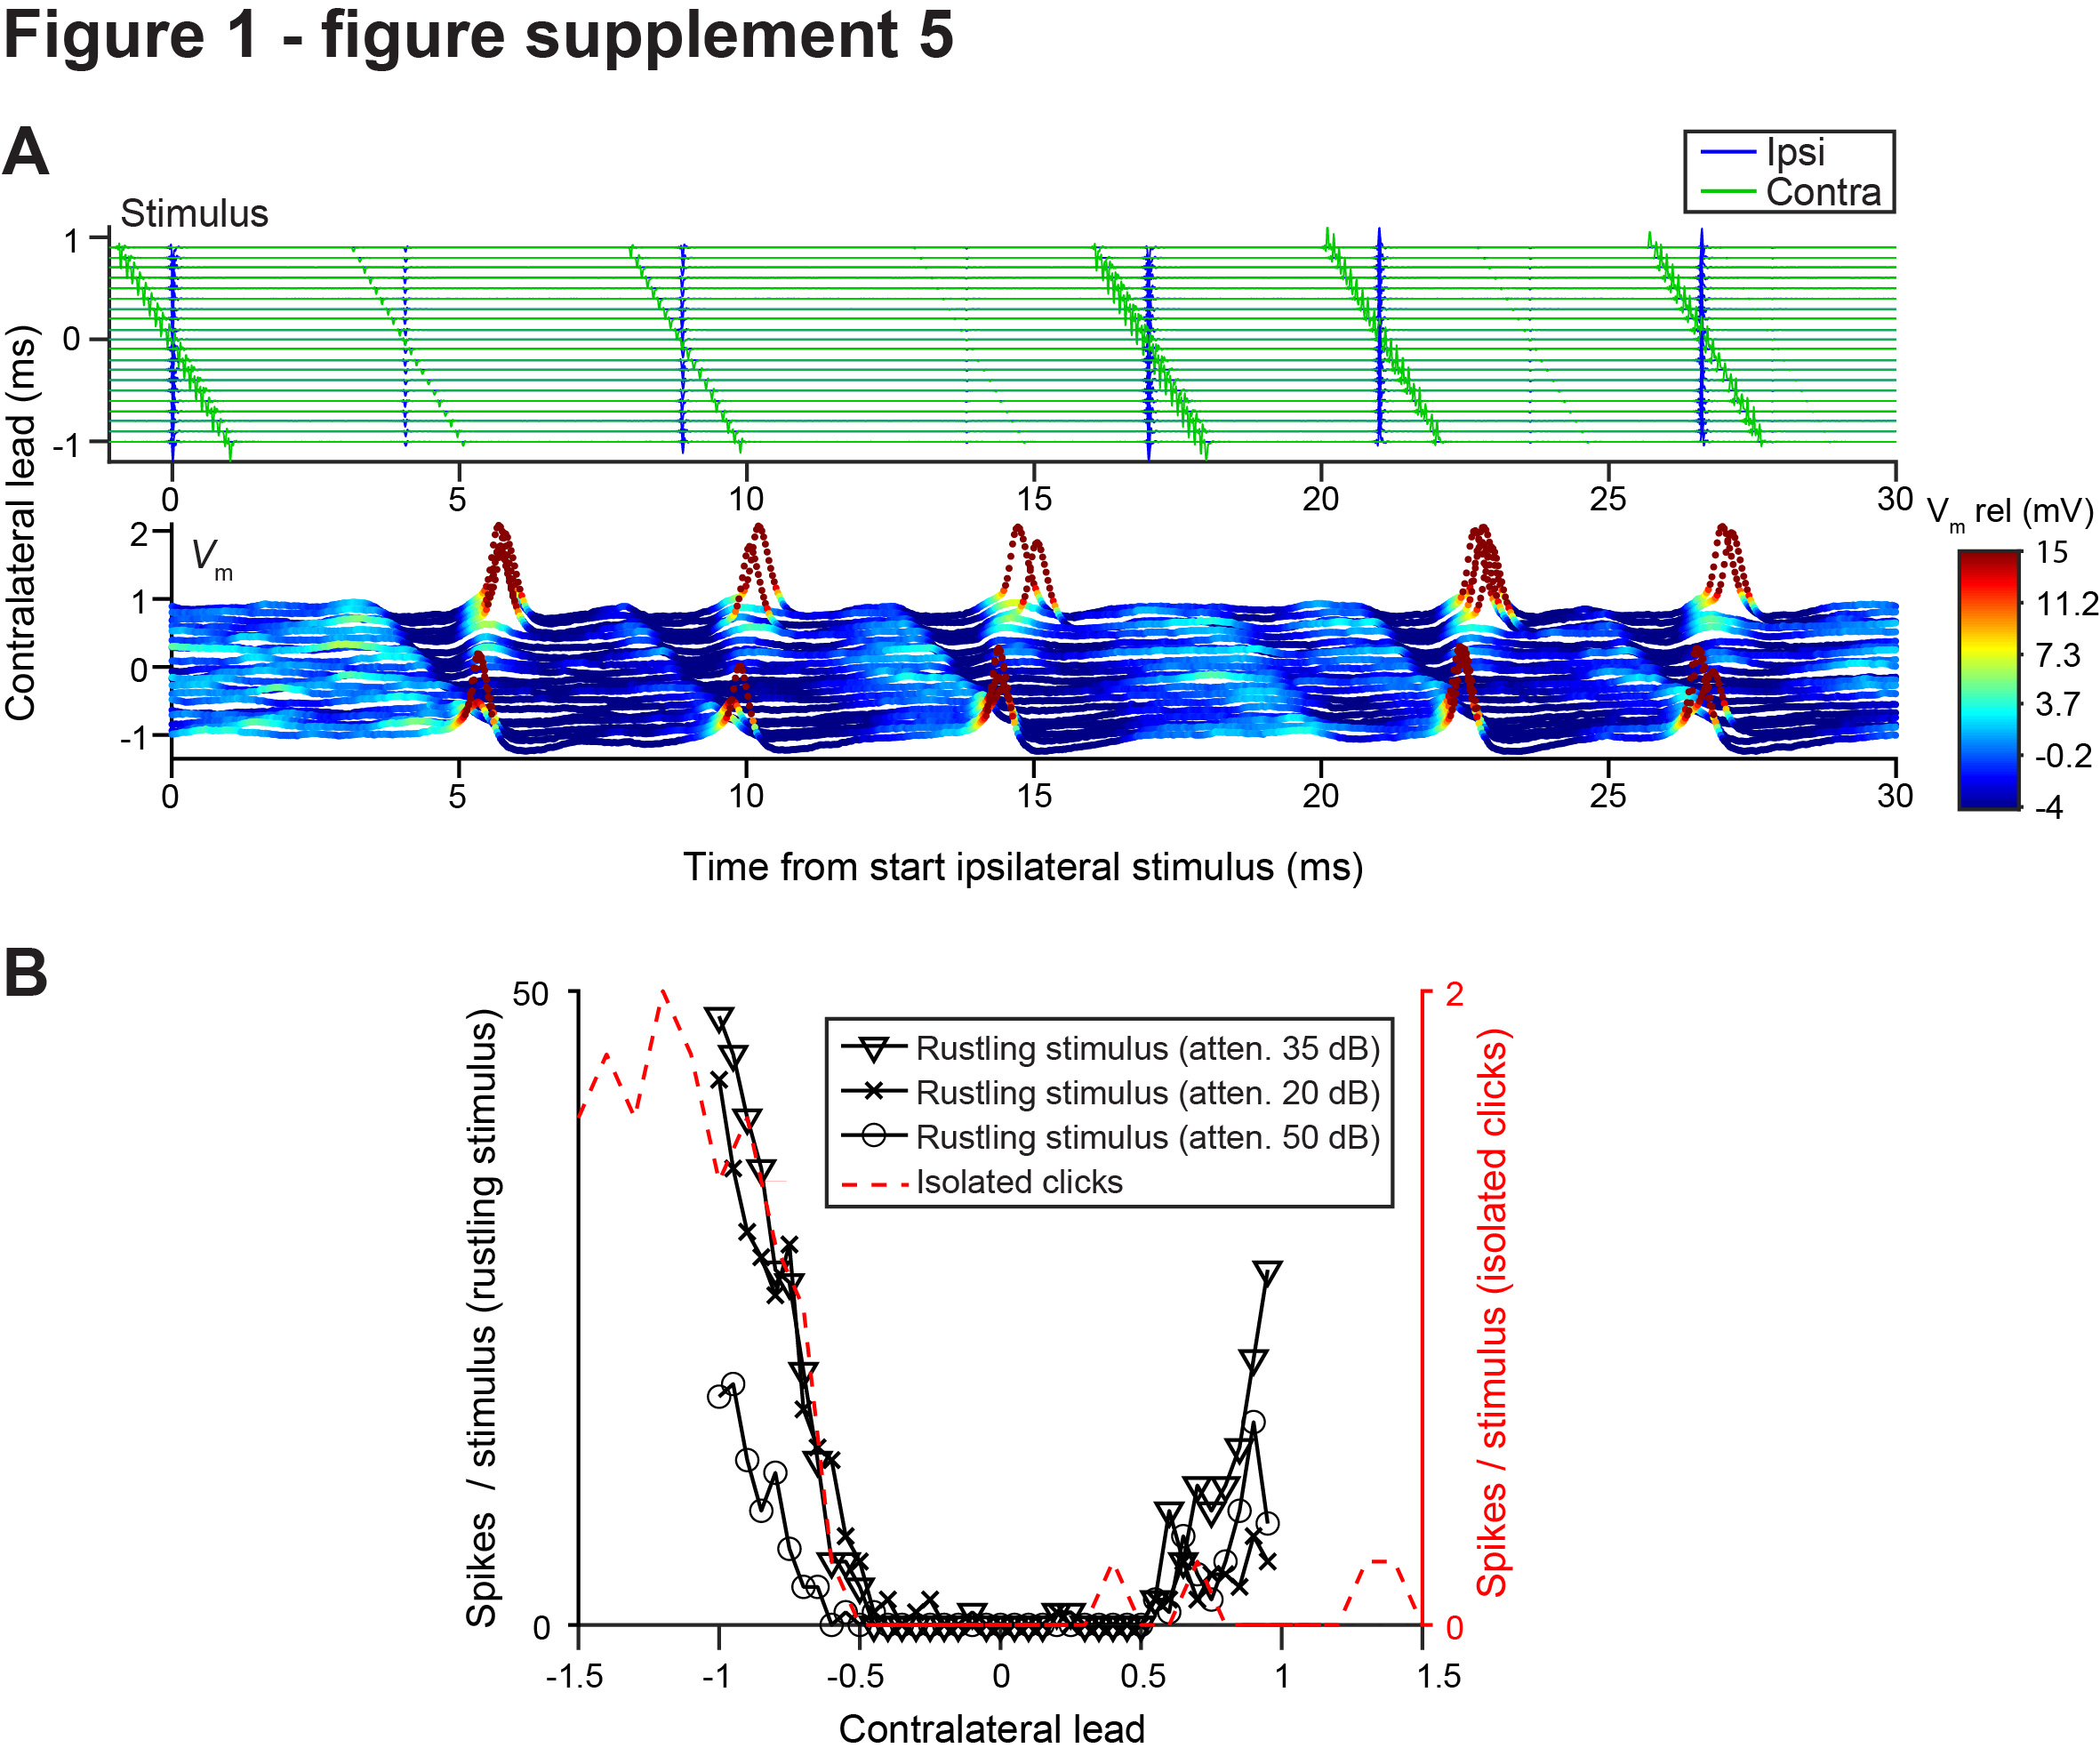

Supplement: supp [file elife-62183-supp-v1.zip › elife_poa_e62183_Figure_1_figure_supplement_5.jpg]

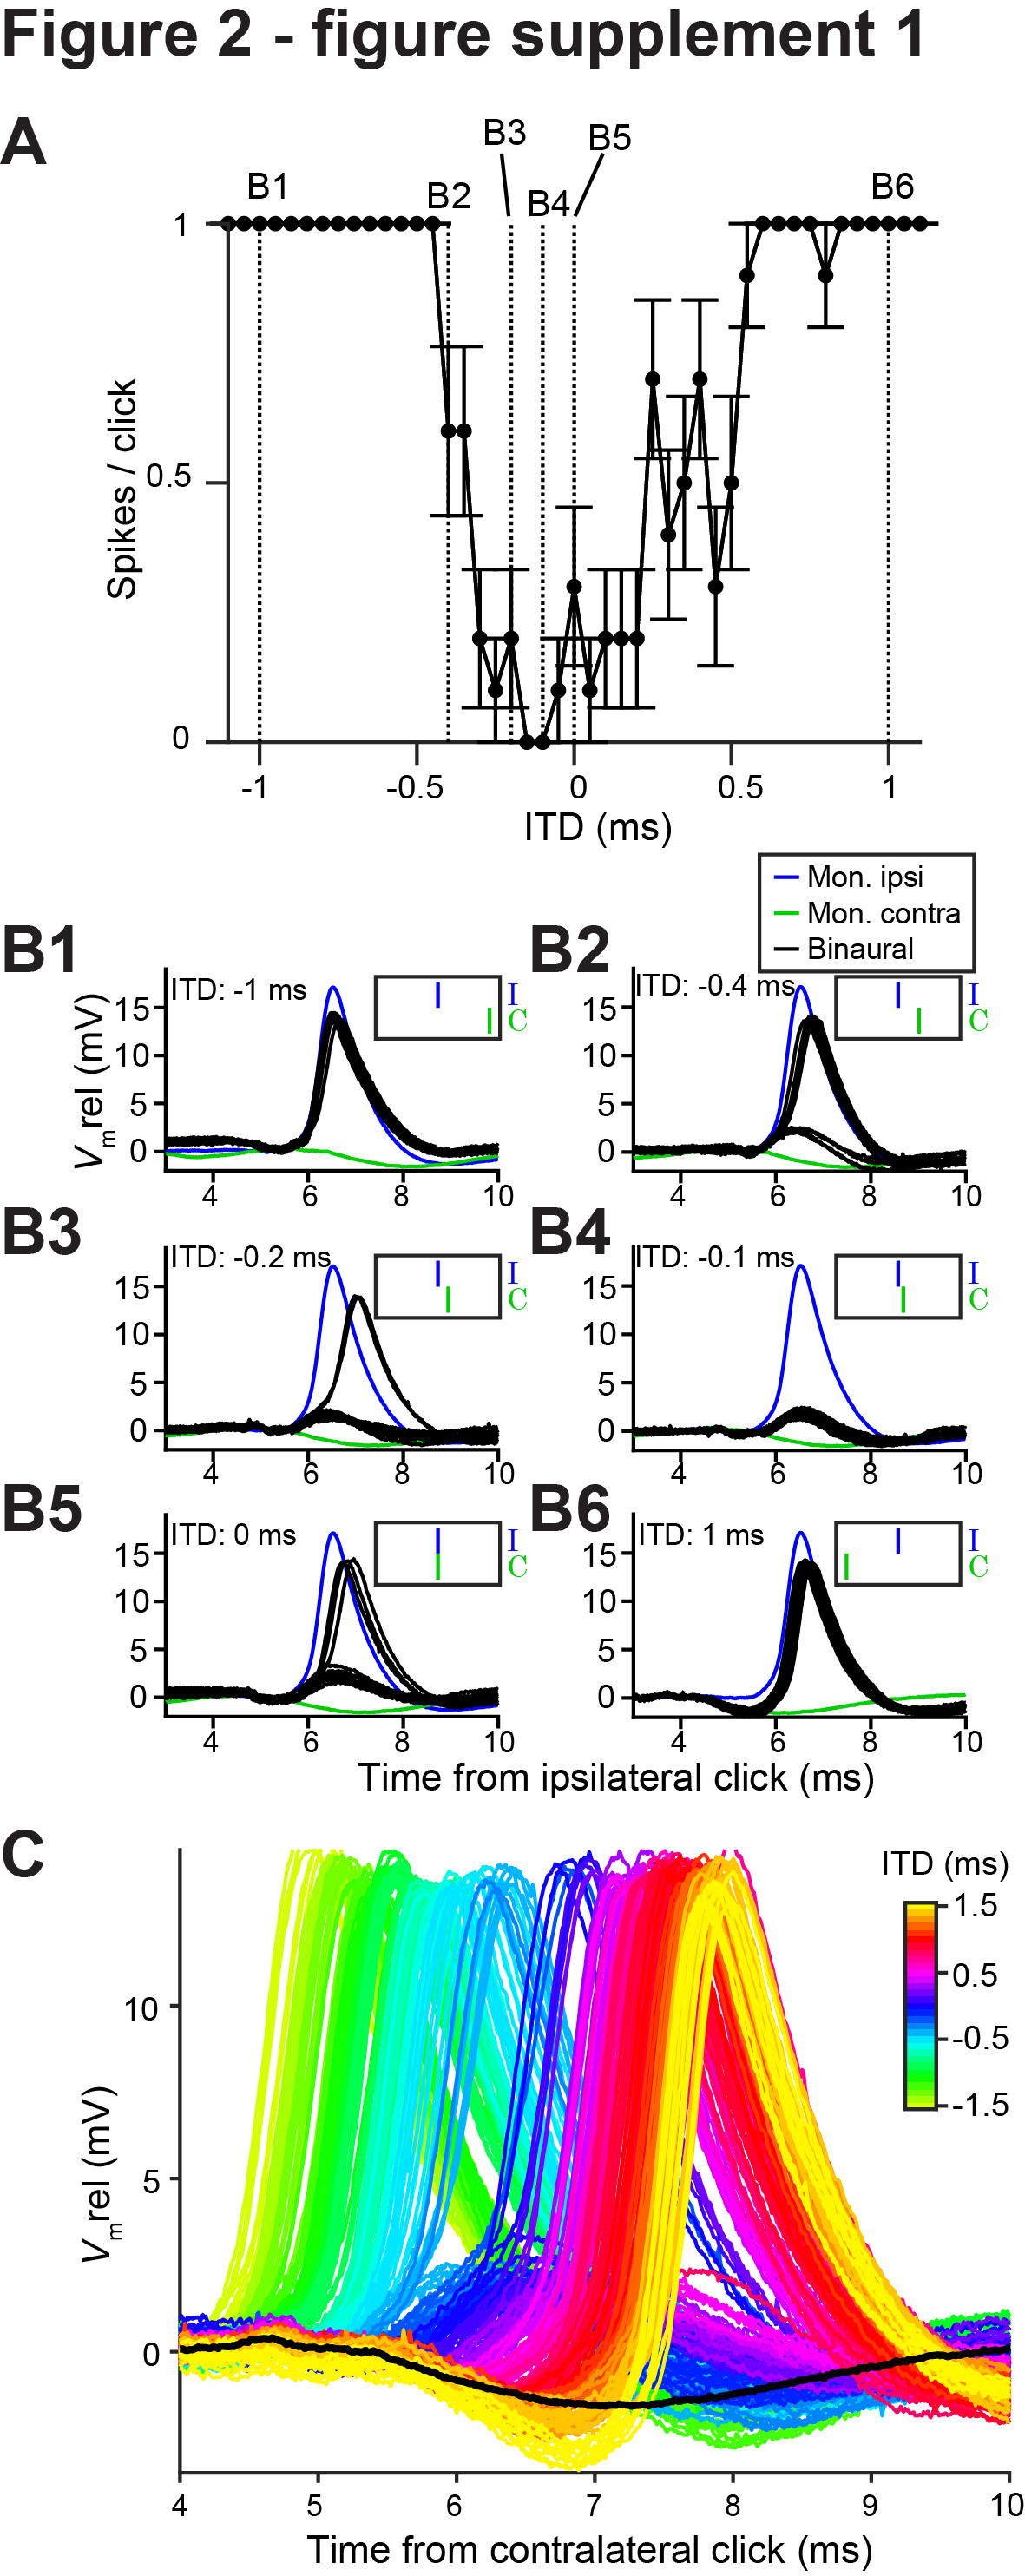

Supplement: supp [file elife-62183-supp-v1.zip › elife_poa_e62183_Figure_2_figure_supplement_1.jpg]

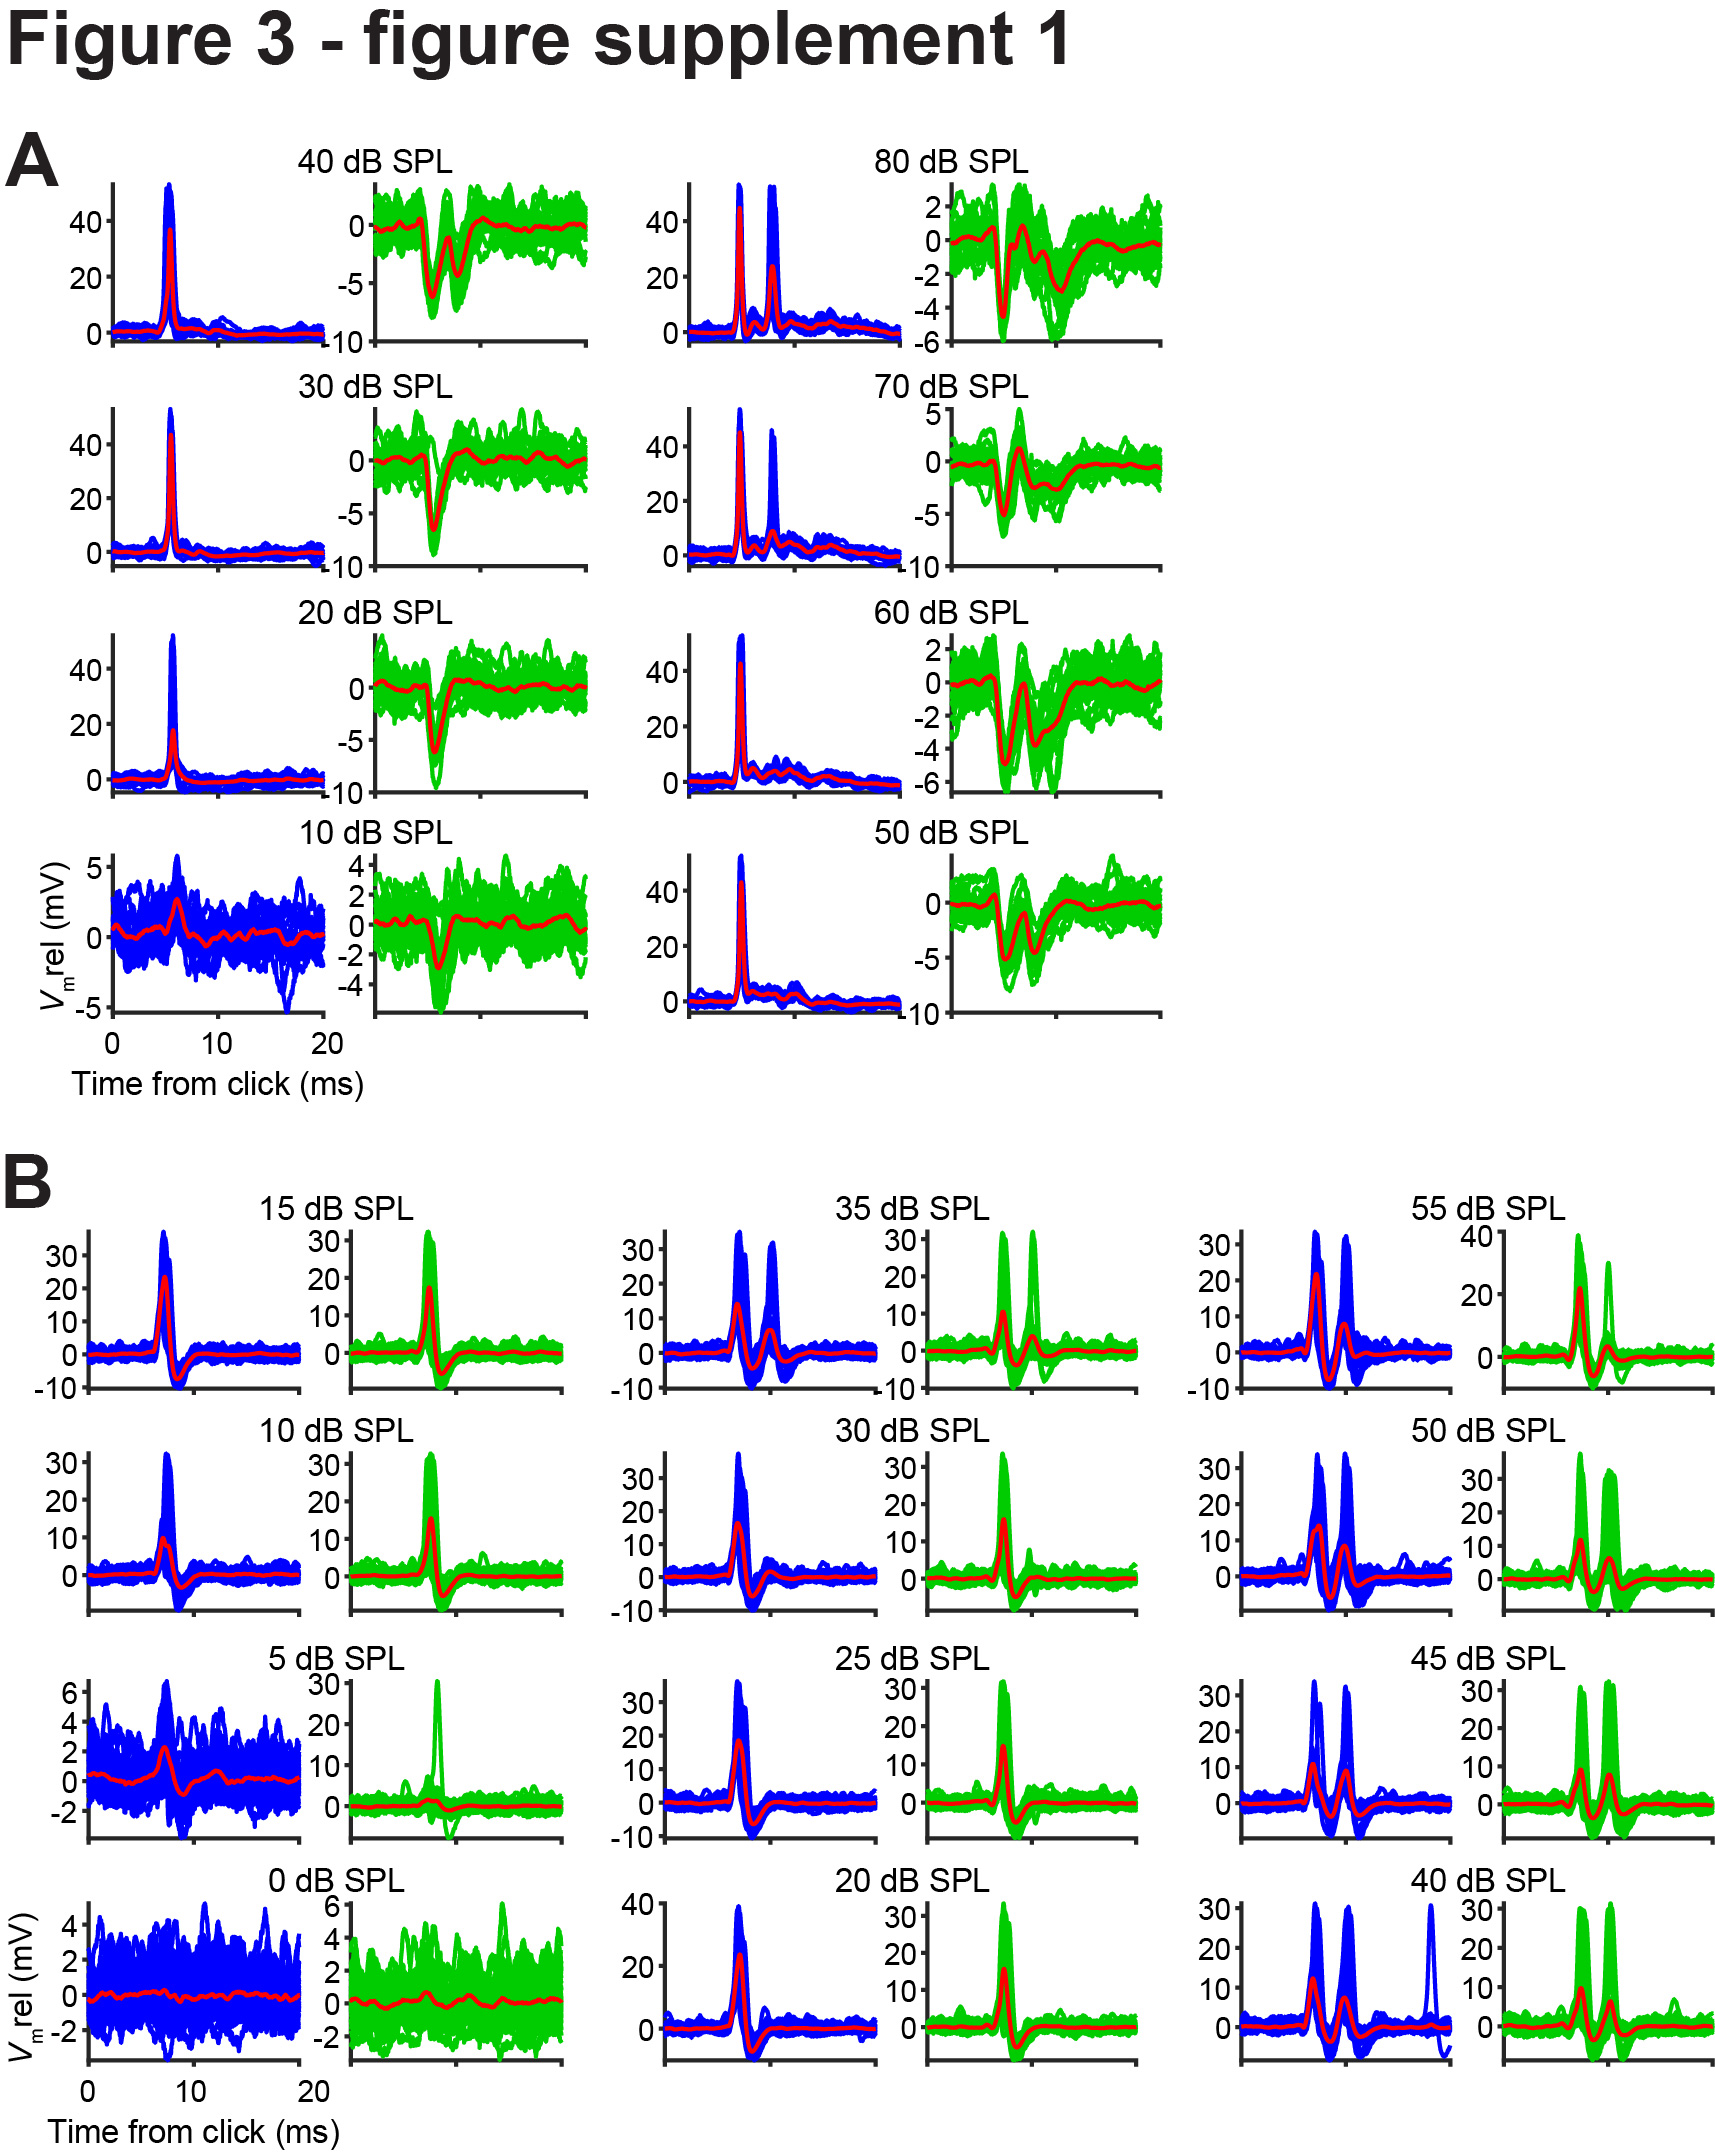

Supplement: supp [file elife-62183-supp-v1.zip › elife_poa_e62183_Figure_3_figure_supplement_1.jpg]

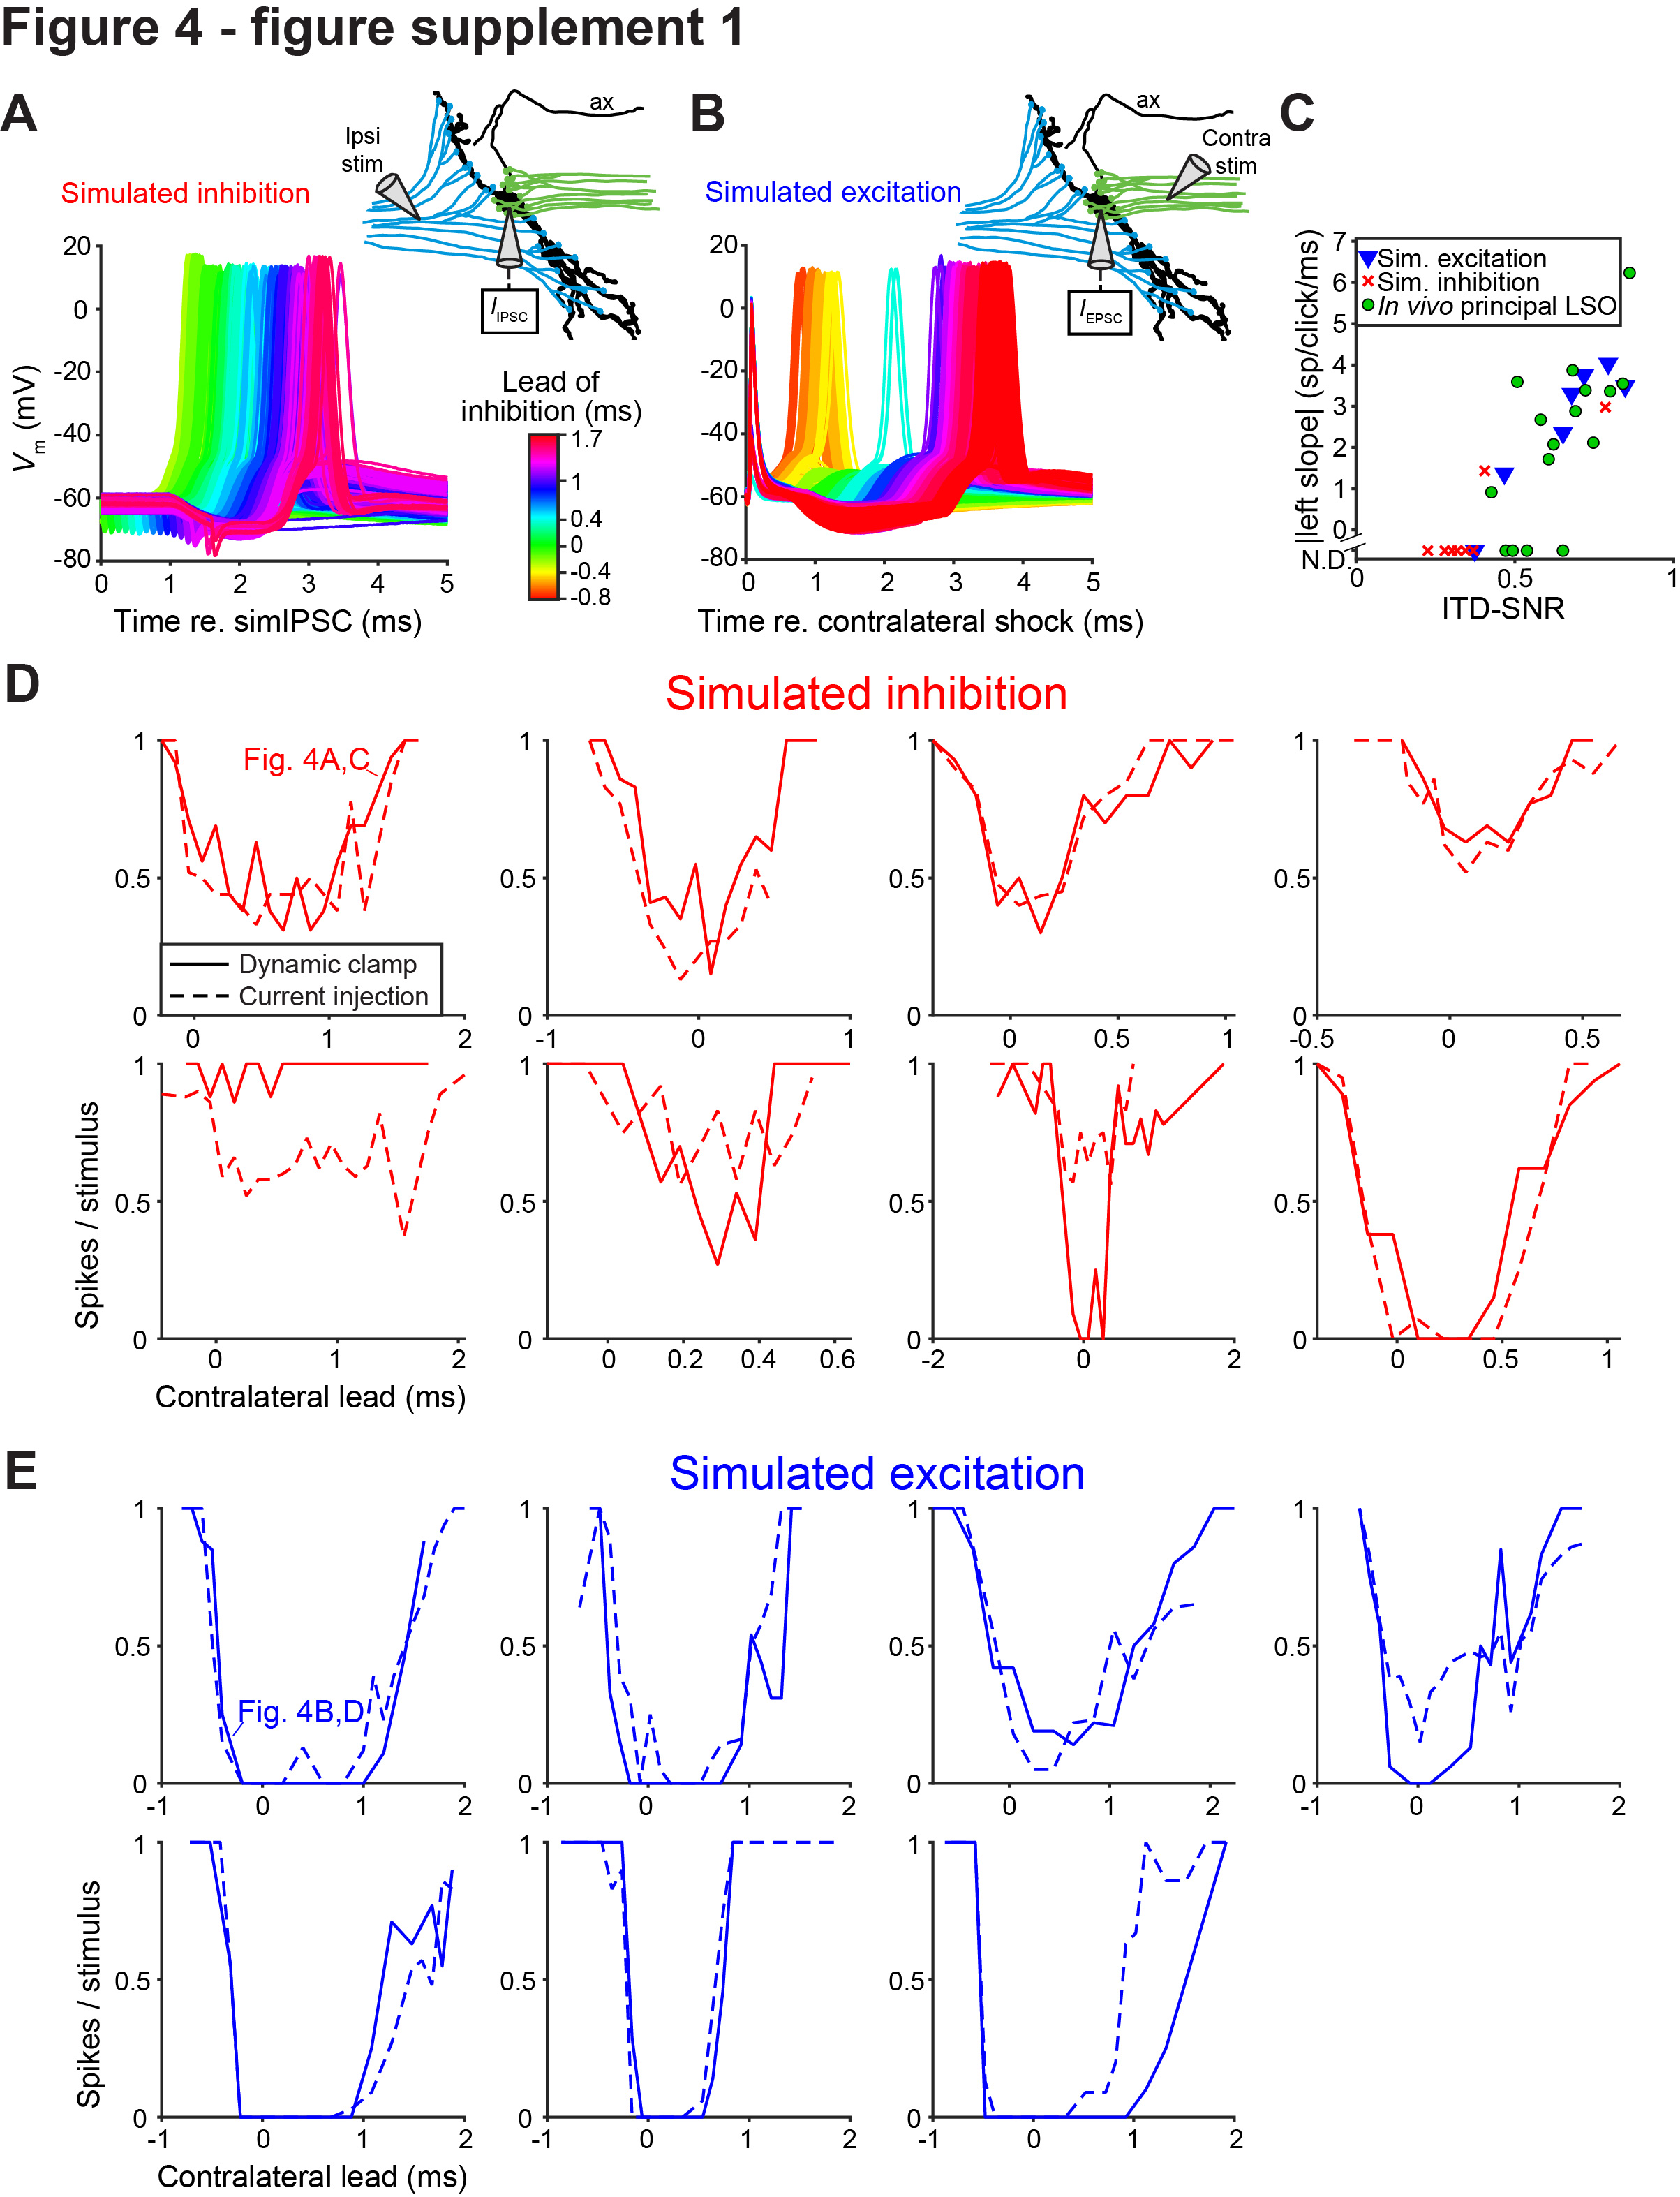

Supplement: supp [file elife-62183-supp-v1.zip › elife_poa_e62183_Figure_4_figure_supplement_1.jpg]

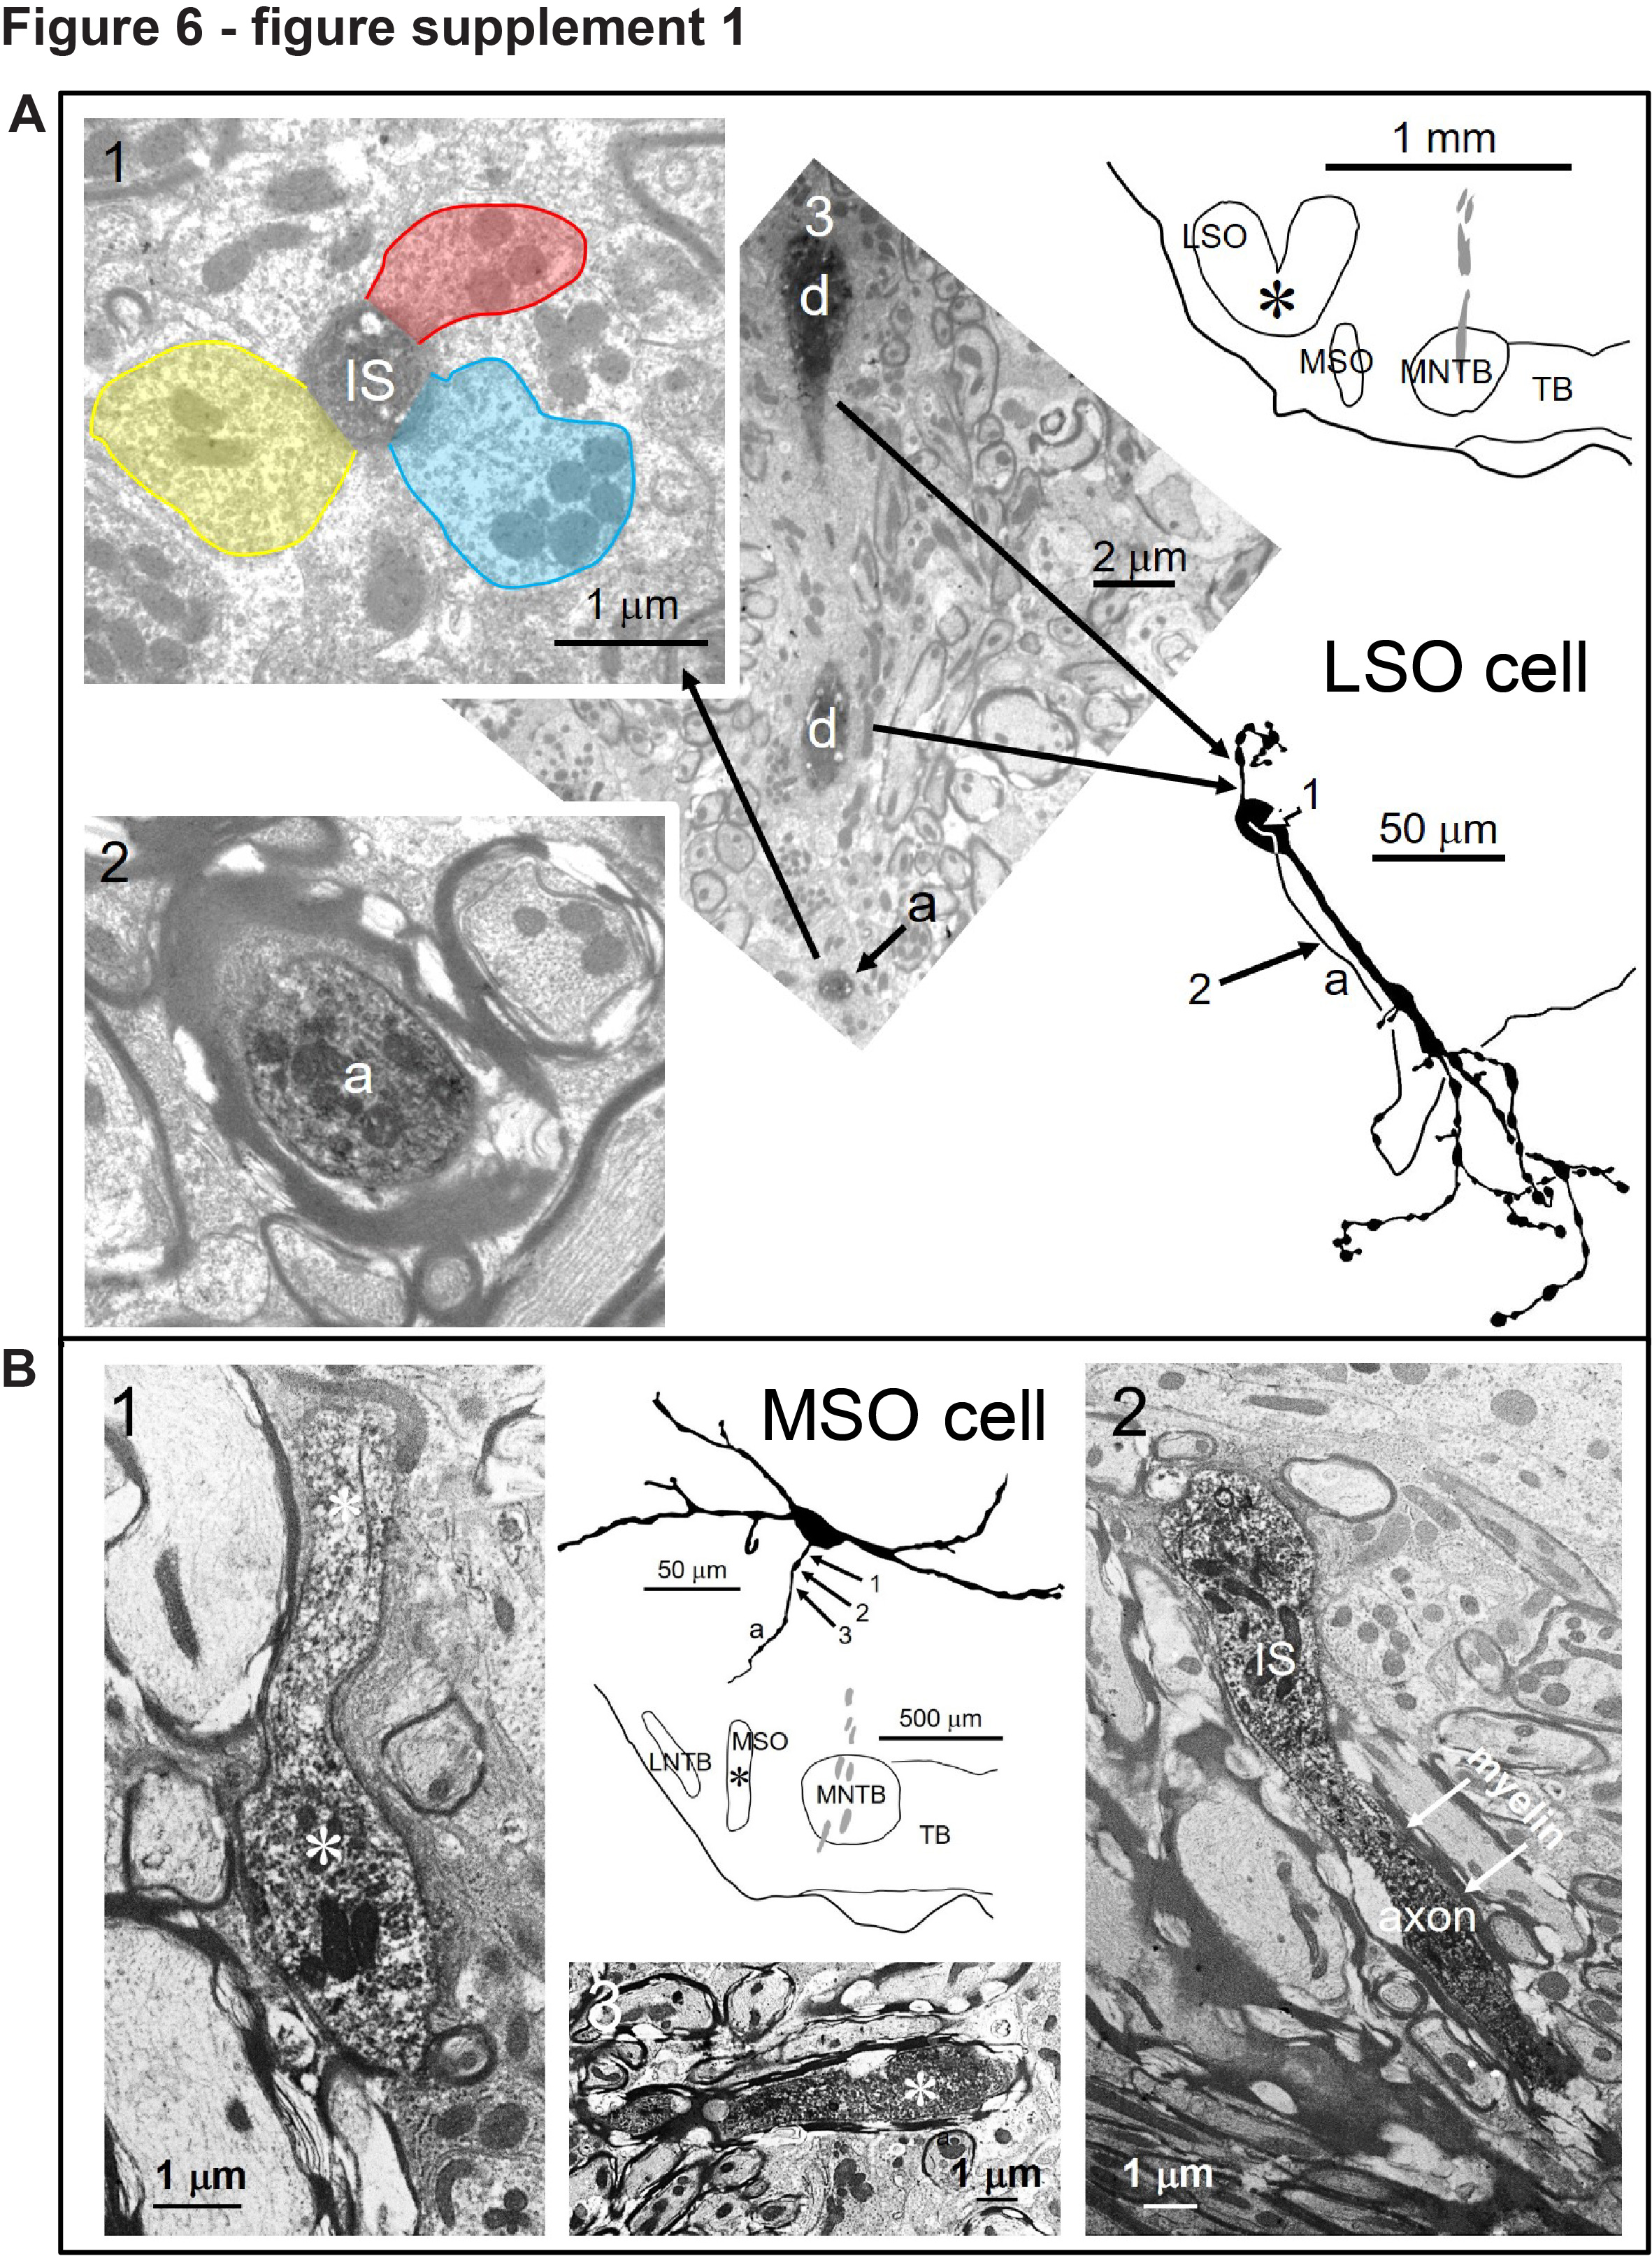

Supplement: supp [file elife-62183-supp-v1.zip › elife_poa_e62183_Figure_6_figure_supplement_1.jpg]

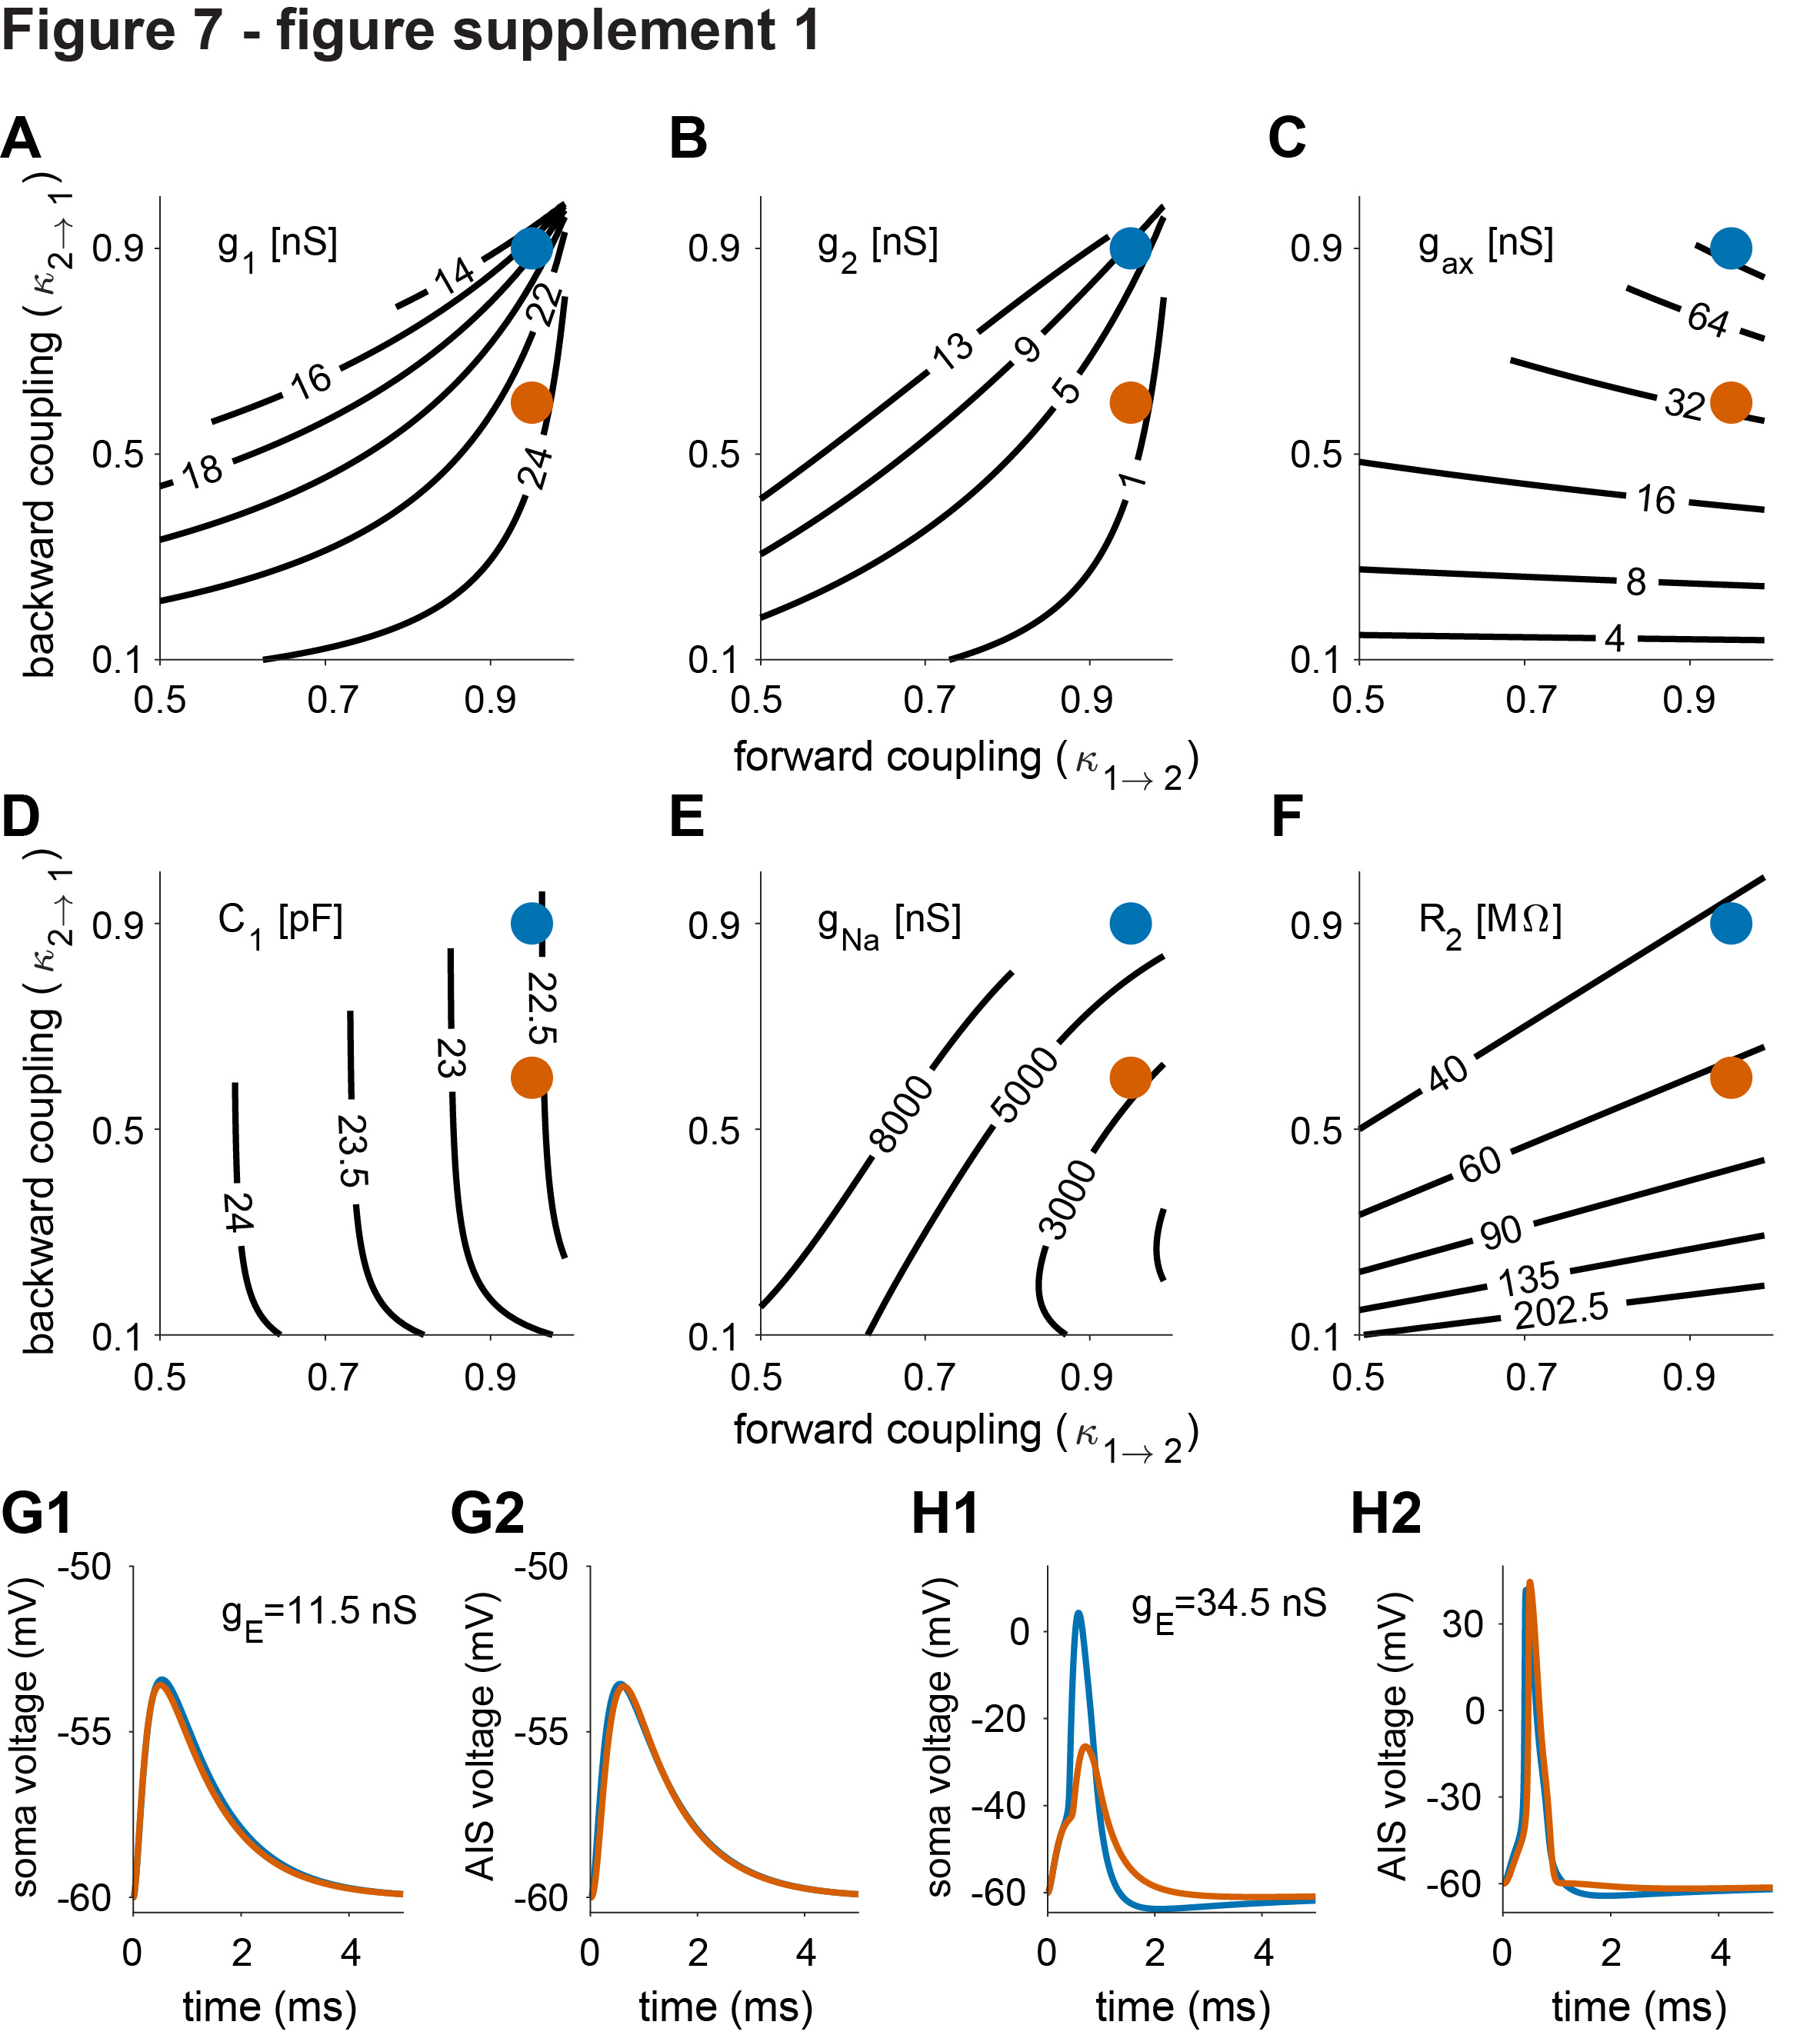

Supplement: supp [file elife-62183-supp-v1.zip › elife_poa_e62183_Figure_7_figure_supplement_1.jpg]

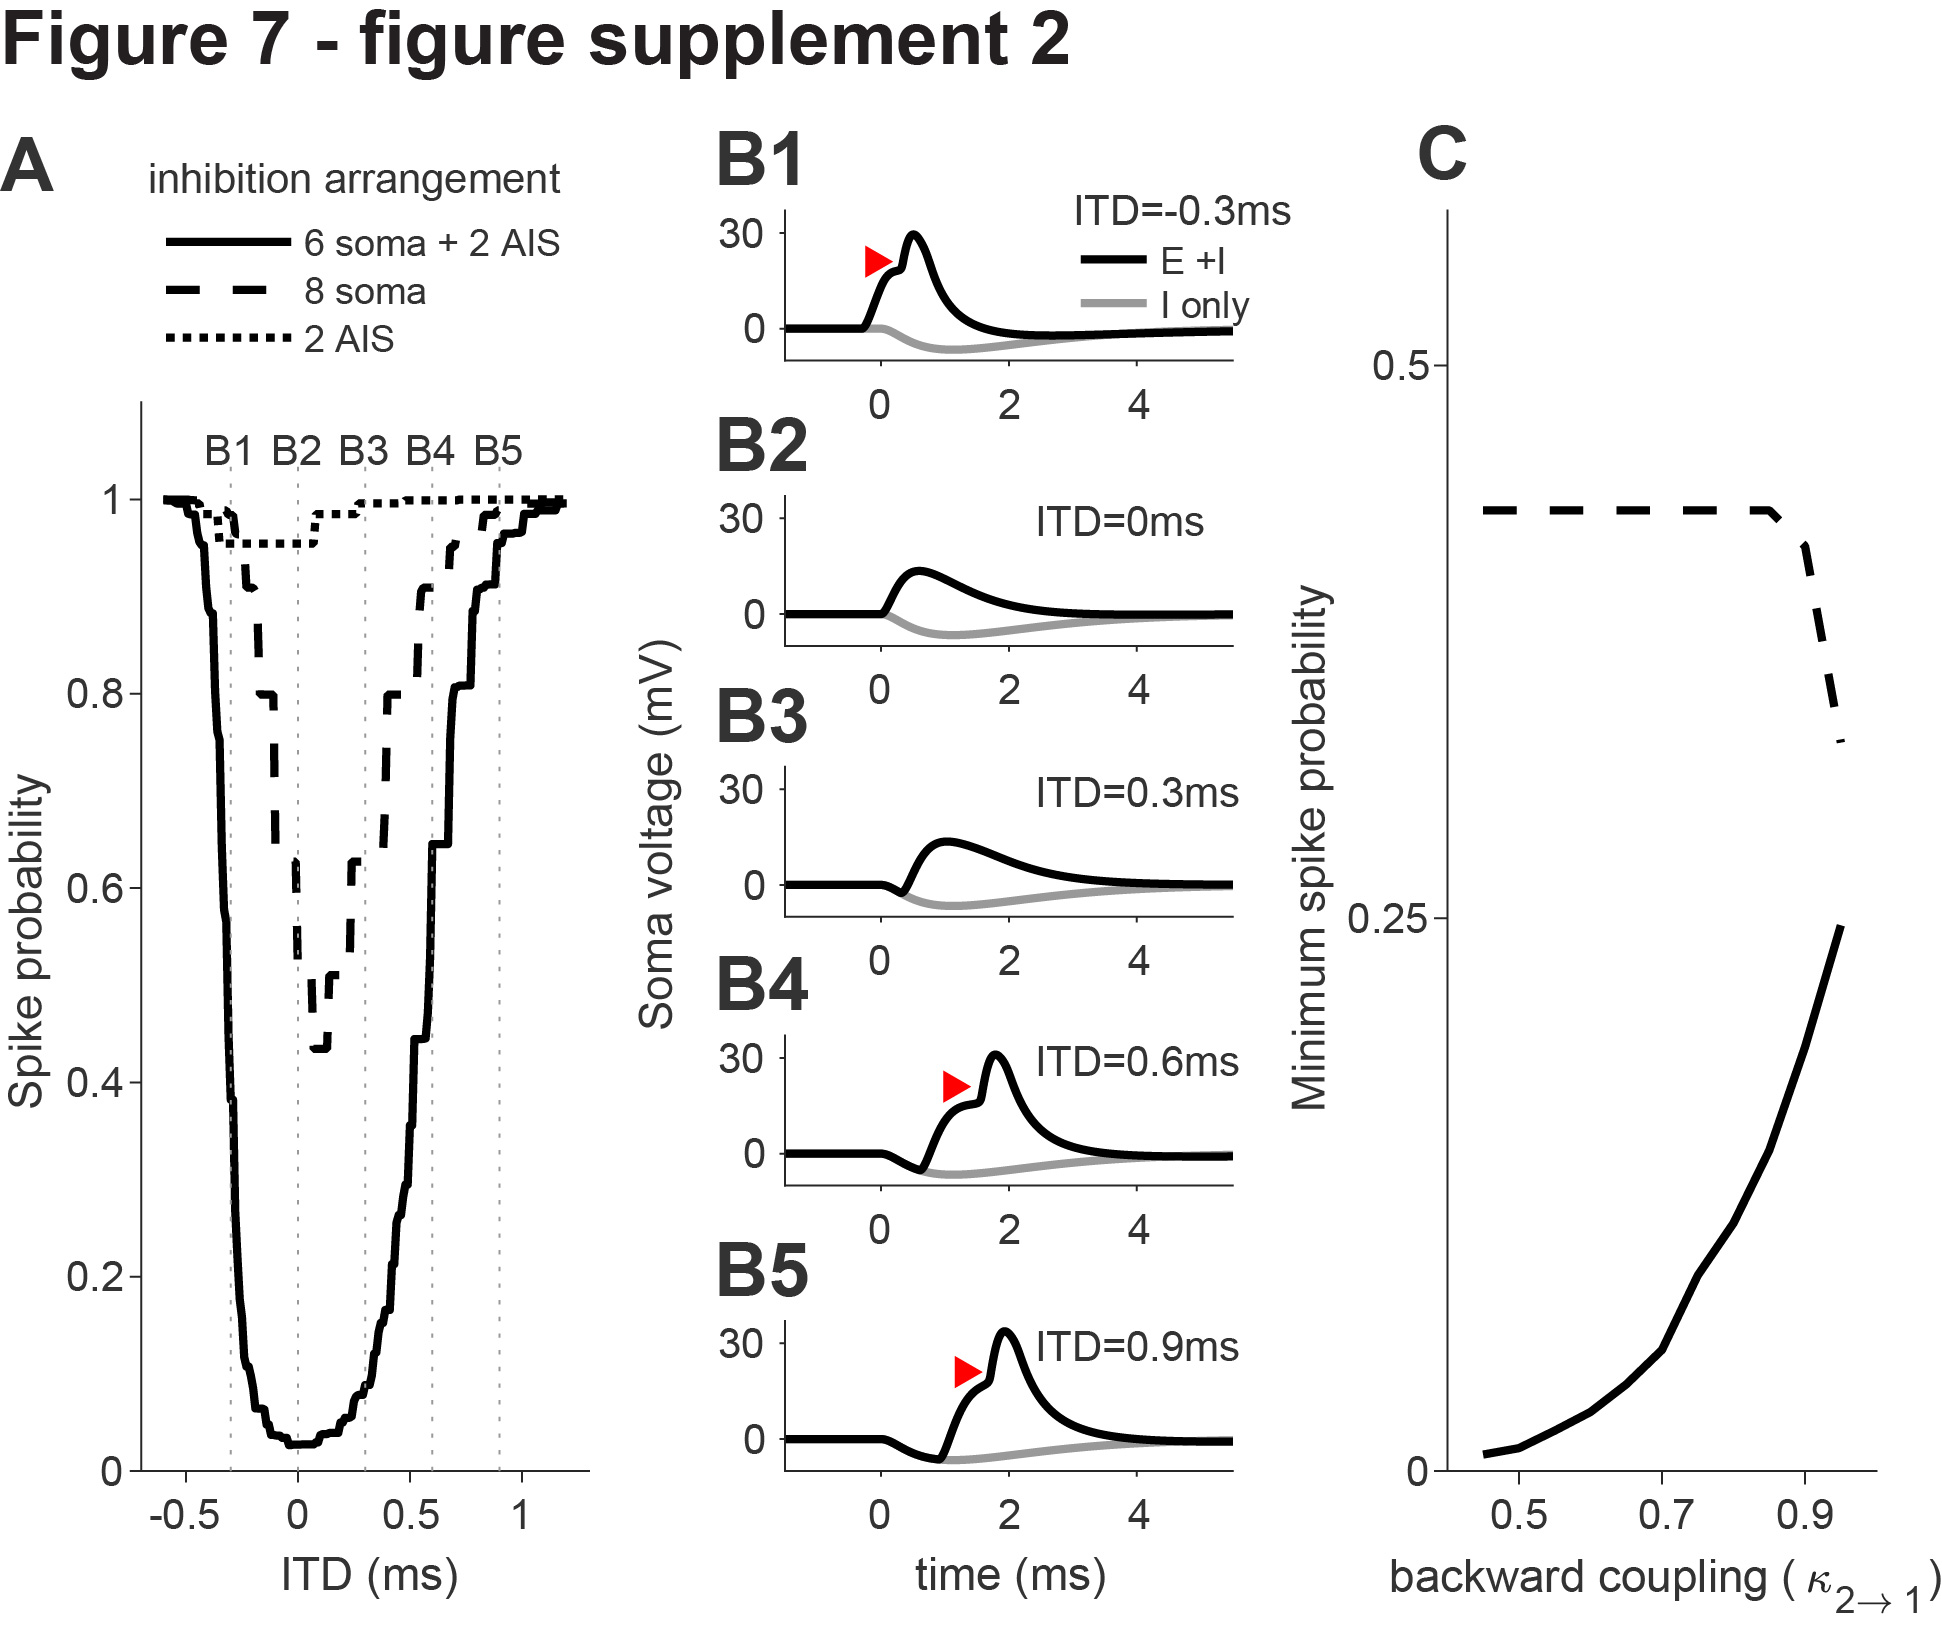

Supplement: supp [file elife-62183-supp-v1.zip › elife_poa_e62183_Figure_7_figure_supplement_2.jpg]

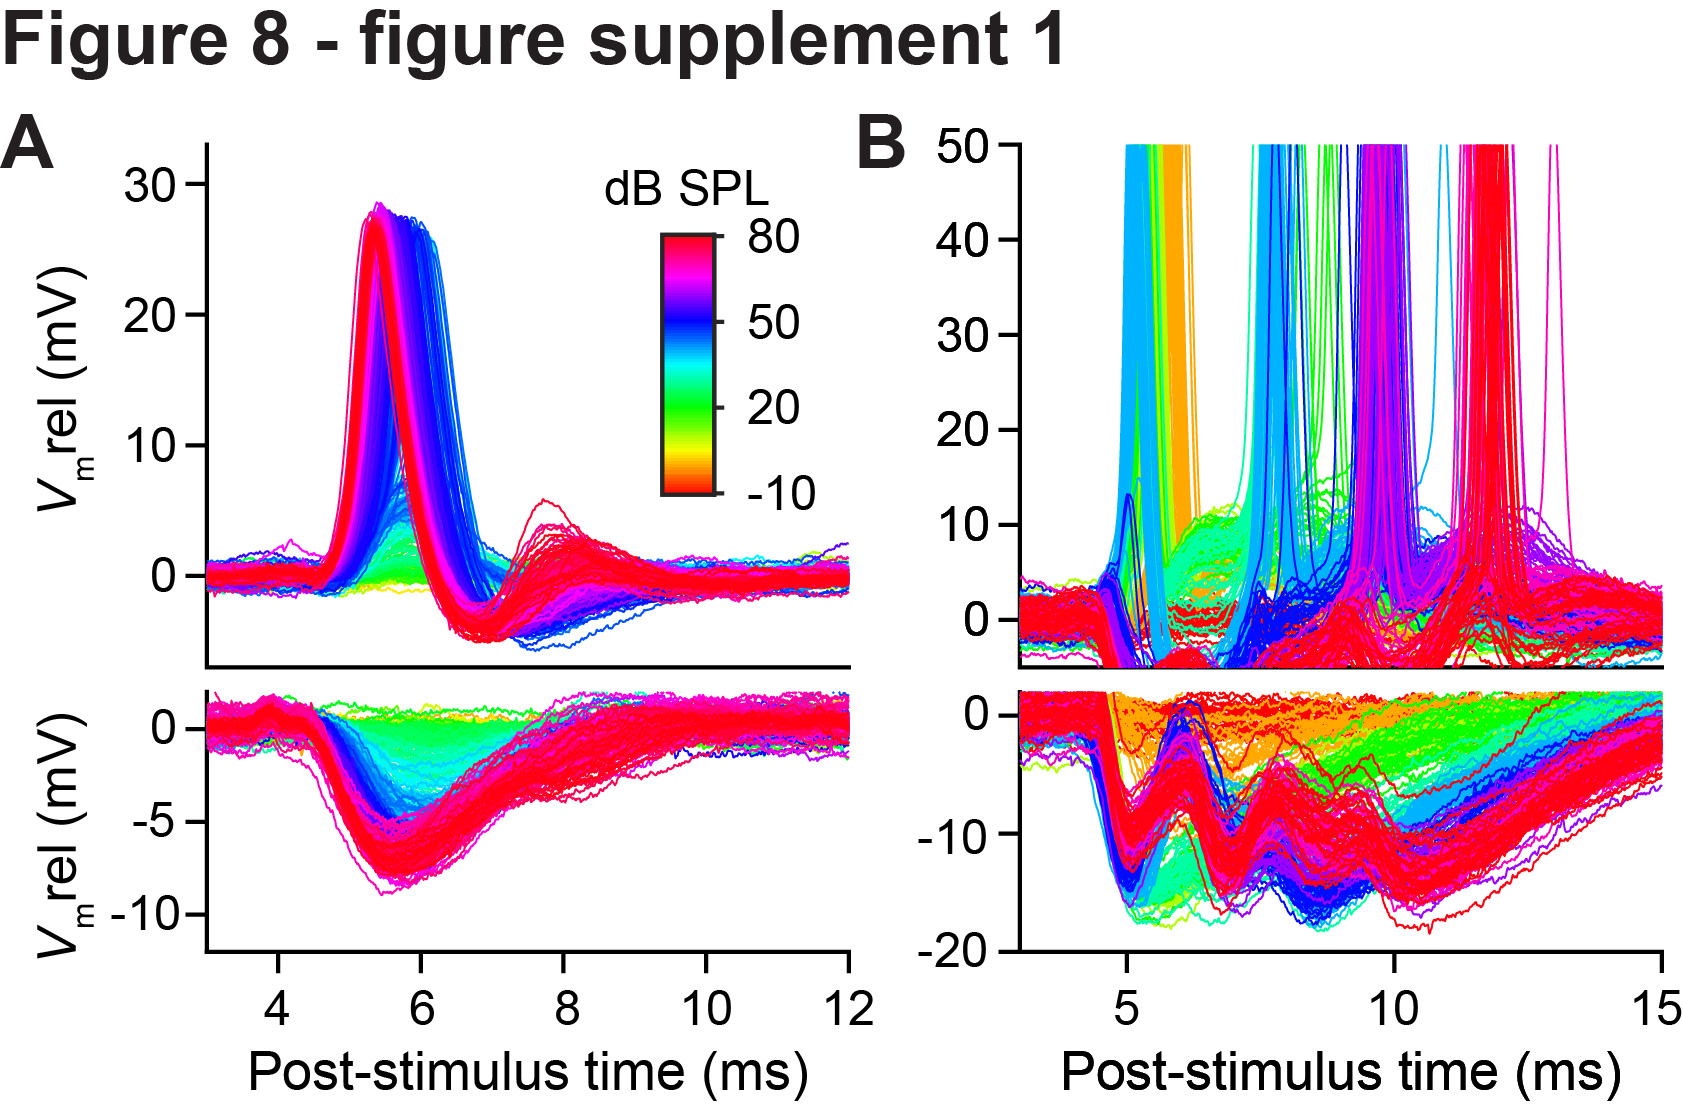

Supplement: supp [file elife-62183-supp-v1.zip › elife_poa_e62183_Figure_8_figure_supplement_1.jpg]

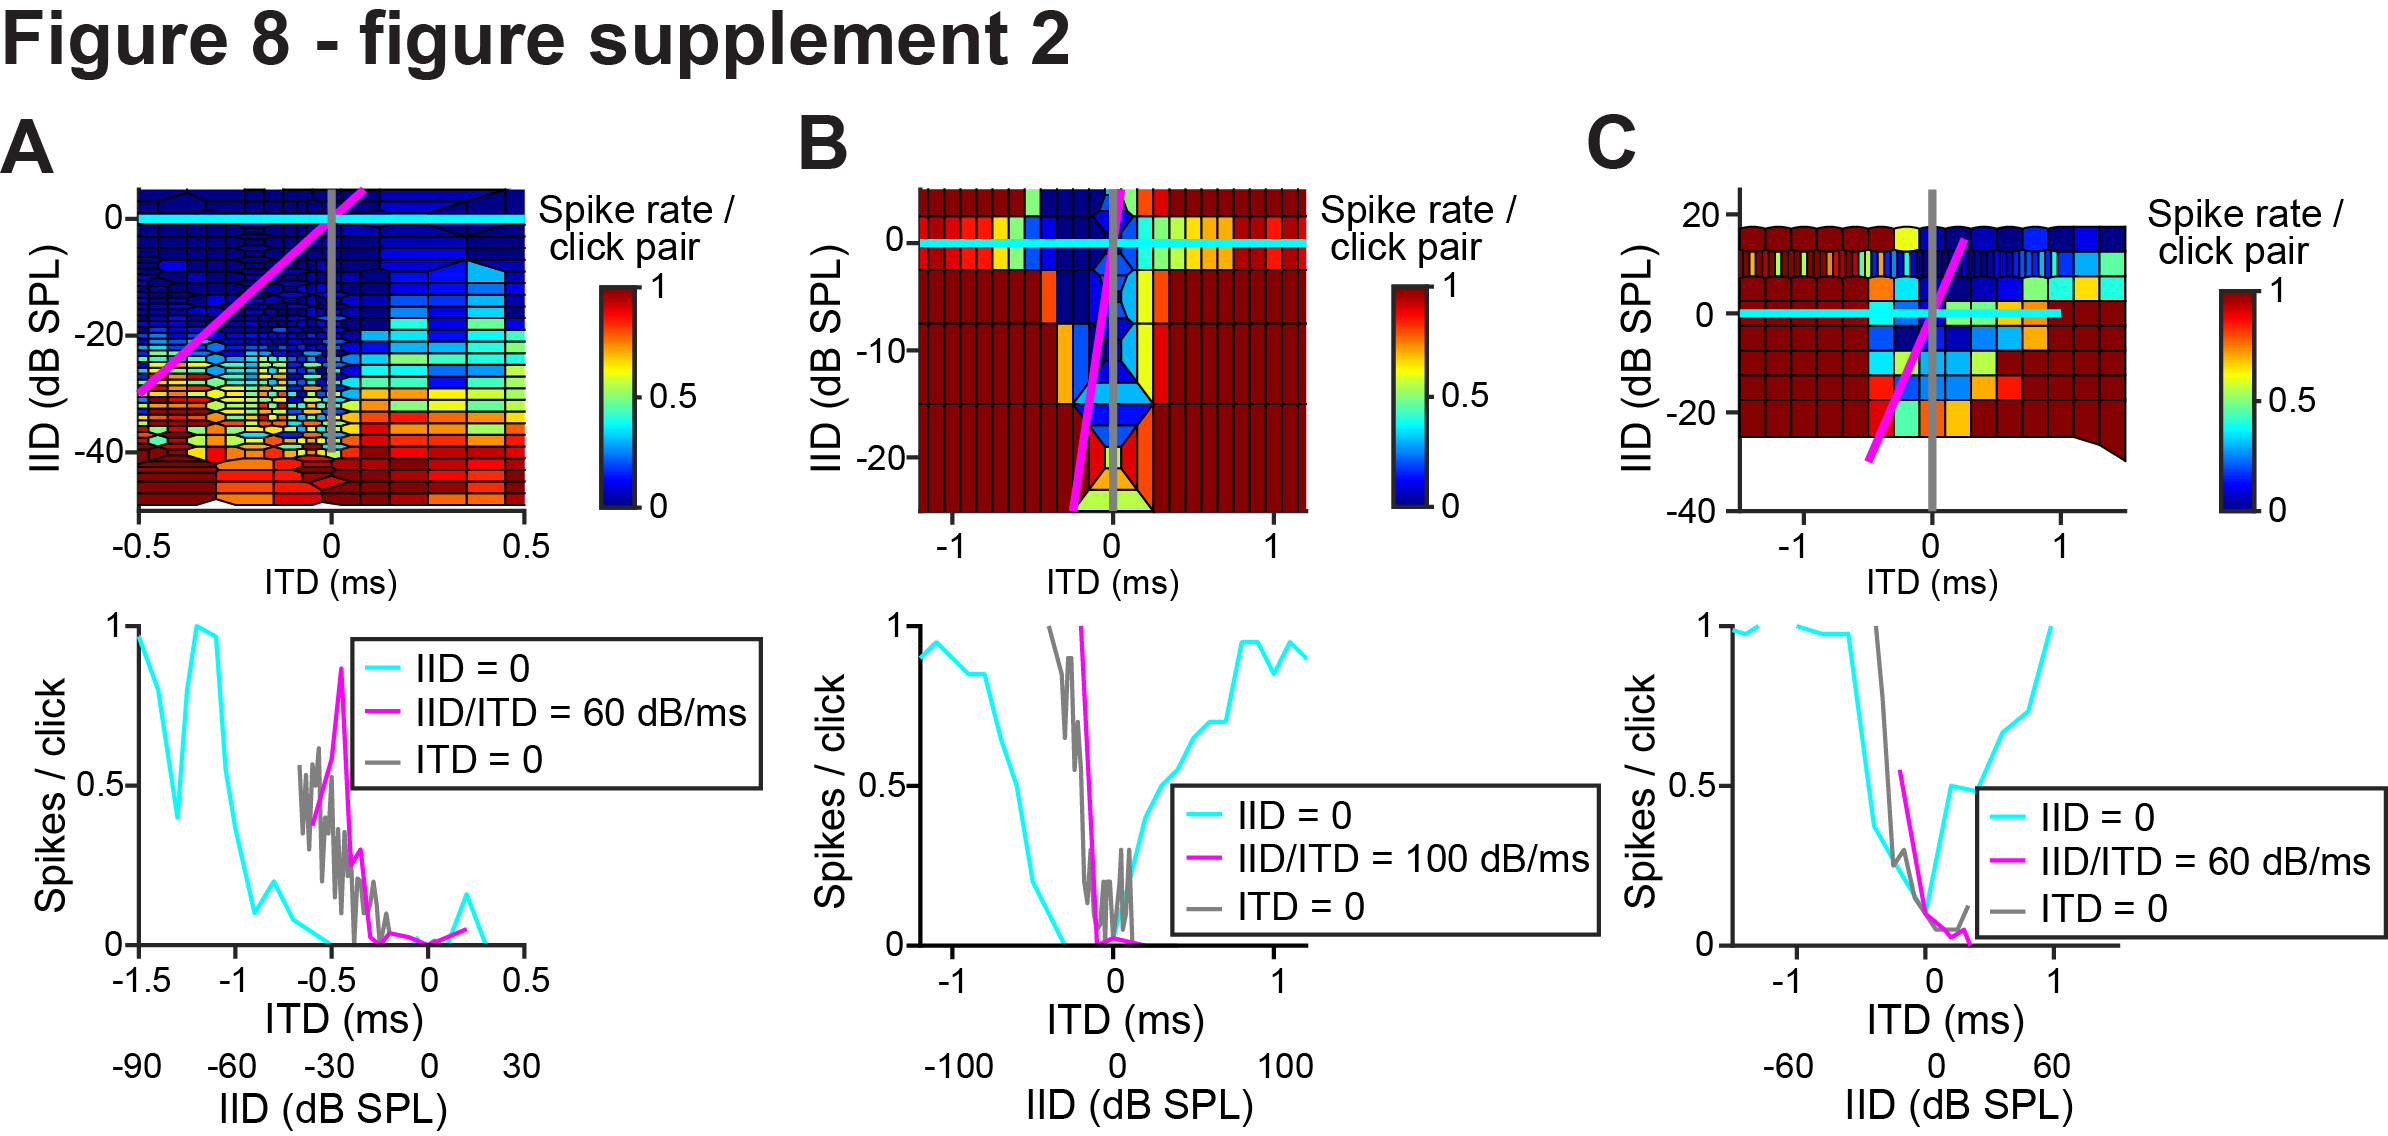

Supplement: supp [file elife-62183-supp-v1.zip › elife_poa_e62183_Figure_8_figure_supplement_2.jpg]
